# Supplementary material for: Retracted Article: Investigation of yellow horn (Xanthoceras sorbifoliaBunge) transcriptome in response to different abiotic stresses: a comparative RNA-Seq study
Source: Royal Society of Chemistry journal article supplement (doi:10.1039/c9ra09535g), 2020-01-01
Supplement: c9ra09535g2.xlsx [file c9ra09535g2.xlsx]

## Sheet: Salt  24h
id	description	q-value	namespace	genes_in_study
GO:0051082	unfolded protein binding	0	molecular_function	EVM0003460;EVM0022547;EVM0019432;EVM0003283;EVM0010674;EVM0005725;EVM0007729;EVM0015281;EVM0021781
GO:0006983	ER overload response	0	biological_process	EVM0019432;EVM0003283;EVM0007171;EVM0015281
GO:0009642	response to light intensity	0	biological_process	EVM0019763;EVM0020785;EVM0003460;EVM0003138;EVM0006954;EVM0023381;EVM0021498;EVM0021002;EVM0009859;EVM0010683;EVM0006448;EVM0015640;EVM0005619;EVM0008012;EVM0021781
GO:0005788	endoplasmic reticulum lumen	0	cellular_component	EVM0022547;EVM0008567;EVM0019432;EVM0007916;EVM0003283;EVM0017015;EVM0014186;EVM0003037;EVM0015281
GO:0042542	response to hydrogen peroxide	0	biological_process	EVM0013186;EVM0020785;EVM0003460;EVM0003138;EVM0006954;EVM0021498;EVM0017982;EVM0021002;EVM0009859;EVM0006448;EVM0015640;EVM0005619;EVM0021781;EVM0000941
GO:0009535	chloroplast thylakoid membrane	0	cellular_component	EVM0003564;EVM0017271;EVM0021298;EVM0001584;EVM0007787;EVM0004774;EVM0012145;EVM0010341;EVM0008786;EVM0004216;EVM0020609;EVM0009426;EVM0011102;EVM0011960;EVM0023381;EVM0007572;EVM0002170;EVM0019546;EVM0018530;EVM0024661;EVM0000854;EVM0010517;EVM0012878;EVM0012979;EVM0013600;EVM0013604;EVM0017312;EVM0002009;EVM0022879;EVM0001844;EVM0017589;EVM0006280;EVM0002121;EVM0023121;EVM0010368;EVM0010386;EVM…
GO:0055035	plastid thylakoid membrane	0	cellular_component	EVM0003564;EVM0017271;EVM0021298;EVM0001584;EVM0007787;EVM0004774;EVM0012145;EVM0010341;EVM0008786;EVM0004216;EVM0020609;EVM0009426;EVM0011102;EVM0011960;EVM0023381;EVM0007572;EVM0002170;EVM0019546;EVM0018530;EVM0024661;EVM0000854;EVM0010517;EVM0012878;EVM0012979;EVM0013600;EVM0013604;EVM0017312;EVM0002009;EVM0022879;EVM0001844;EVM0017589;EVM0006280;EVM0002121;EVM0023121;EVM0010368;EVM0010386;EVM…
GO:0031977	thylakoid lumen	0	cellular_component	EVM0004774;EVM0022985;EVM0000432;EVM0011102;EVM0023381;EVM0002170;EVM0021756;EVM0012979;EVM0023121;EVM0014582;EVM0021583
GO:0009314	response to radiation	0	biological_process	EVM0019763;EVM0020785;EVM0003460;EVM0007787;EVM0012145;EVM0020609;EVM0003138;EVM0006954;EVM0023381;EVM0021498;EVM0010517;EVM0021002;EVM0012979;EVM0019225;EVM0013600;EVM0013604;EVM0009859;EVM0013488;EVM0012252;EVM0017589;EVM0010683;EVM0023121;EVM0006448;EVM0015640;EVM0023007;EVM0014397;EVM0005619;EVM0005615;EVM0008012;EVM0021781;EVM0022215;EVM0006185
GO:0006986	response to unfolded protein	0	biological_process	EVM0003460;EVM0019432;EVM0003283;EVM0007950;EVM0005619;EVM0007729;EVM0015281
GO:0019684	photosynthesis, light reaction	0	biological_process	EVM0010341;EVM0023381;EVM0002170;EVM0013604;EVM0010386;EVM0005722;EVM0014397;EVM0014099;EVM0021583;EVM0006811;EVM0006185
GO:0042651	thylakoid membrane	0	cellular_component	EVM0003564;EVM0017271;EVM0021298;EVM0001584;EVM0007787;EVM0004774;EVM0012145;EVM0010341;EVM0008786;EVM0004216;EVM0020609;EVM0009426;EVM0011102;EVM0011960;EVM0023381;EVM0007572;EVM0002170;EVM0019546;EVM0018530;EVM0024661;EVM0000854;EVM0010517;EVM0012878;EVM0012979;EVM0013600;EVM0013604;EVM0017312;EVM0002009;EVM0022879;EVM0001844;EVM0017589;EVM0006280;EVM0002121;EVM0023121;EVM0010368;EVM0010386;EVM…
GO:0034357	photosynthetic membrane	0	cellular_component	EVM0003564;EVM0017271;EVM0021298;EVM0001584;EVM0007787;EVM0004774;EVM0012145;EVM0010341;EVM0008786;EVM0004216;EVM0020609;EVM0009426;EVM0011102;EVM0011960;EVM0023381;EVM0007572;EVM0002170;EVM0019546;EVM0018530;EVM0024661;EVM0000854;EVM0010517;EVM0012878;EVM0012979;EVM0013600;EVM0013604;EVM0017312;EVM0002009;EVM0022879;EVM0001844;EVM0017589;EVM0006280;EVM0002121;EVM0023121;EVM0010368;EVM0010386;EVM…
GO:0010287	plastoglobule	0	cellular_component	EVM0003564;EVM0021298;EVM0012145;EVM0020609;EVM0023381;EVM0021756;EVM0010517;EVM0012878;EVM0013604;EVM0004163;EVM0022879;EVM0017589;EVM0014582;EVM0003473;EVM0005722;EVM0011506;EVM0006185
GO:0010038	response to metal ion	0	biological_process	EVM0013186;EVM0006179;EVM0003764;EVM0020785;EVM0022547;EVM0008305;EVM0008567;EVM0021756;EVM0018344;EVM0021498;EVM0003679;EVM0009637;EVM0001459;EVM0002980;EVM0017982;EVM0000034;EVM0017015;EVM0014754;EVM0019225;EVM0017312;EVM0012199;EVM0018355;EVM0005239;EVM0023121;EVM0009331;EVM0020276;EVM0016092
GO:0015979	photosynthesis	0	biological_process	EVM0012145;EVM0010341;EVM0023381;EVM0002170;EVM0012979;EVM0013604;EVM0017589;EVM0010386;EVM0005722;EVM0014397;EVM0014099;EVM0017932;EVM0021583;EVM0006811;EVM0006185
GO:0031976	plastid thylakoid	0	cellular_component	EVM0003564;EVM0019763;EVM0017271;EVM0021298;EVM0001584;EVM0007787;EVM0004774;EVM0022985;EVM0012145;EVM0000432;EVM0010341;EVM0008786;EVM0004216;EVM0020609;EVM0009426;EVM0011102;EVM0011960;EVM0023381;EVM0007572;EVM0002170;EVM0019546;EVM0018530;EVM0021756;EVM0003679;EVM0024661;EVM0000854;EVM0010517;EVM0012878;EVM0012979;EVM0013600;EVM0013604;EVM0017312;EVM0013829;EVM0002009;EVM0022879;EVM0001844;EVM…
GO:0009534	chloroplast thylakoid	0	cellular_component	EVM0003564;EVM0019763;EVM0017271;EVM0021298;EVM0001584;EVM0007787;EVM0004774;EVM0022985;EVM0012145;EVM0000432;EVM0010341;EVM0008786;EVM0004216;EVM0020609;EVM0009426;EVM0011102;EVM0011960;EVM0023381;EVM0007572;EVM0002170;EVM0019546;EVM0018530;EVM0021756;EVM0003679;EVM0024661;EVM0000854;EVM0010517;EVM0012878;EVM0012979;EVM0013600;EVM0013604;EVM0017312;EVM0013829;EVM0002009;EVM0022879;EVM0001844;EVM…
GO:0042470	melanosome	0	cellular_component	EVM0019432;EVM0003283;EVM0010674;EVM0007729;EVM0015281
GO:0048770	pigment granule	0	cellular_component	EVM0019432;EVM0003283;EVM0010674;EVM0007729;EVM0015281
GO:0071353	cellular response to interleukin-4	0	biological_process	EVM0019432;EVM0003283;EVM0007729;EVM0015281
GO:0016168	chlorophyll binding	0	molecular_function	EVM0007572;EVM0013600;EVM0017589;EVM0006185
GO:0070670	response to interleukin-4	0	biological_process	EVM0019432;EVM0003283;EVM0007729;EVM0015281
GO:0046686	response to cadmium ion	0	biological_process	EVM0013186;EVM0003764;EVM0020785;EVM0022547;EVM0008305;EVM0008567;EVM0021756;EVM0018344;EVM0021498;EVM0003679;EVM0009637;EVM0001459;EVM0002980;EVM0017982;EVM0000034;EVM0017015;EVM0014754;EVM0019225;EVM0017312;EVM0012199;EVM0018355;EVM0005239;EVM0009331;EVM0020276;EVM0016092
GO:0009941	chloroplast envelope	0	cellular_component	EVM0003564;EVM0019763;EVM0021298;EVM0002554;EVM0023697;EVM0004216;EVM0020609;EVM0000371;EVM0019546;EVM0021756;EVM0003679;EVM0024661;EVM0000854;EVM0001459;EVM0010517;EVM0011174;EVM0012979;EVM0013604;EVM0017312;EVM0022879;EVM0001844;EVM0017589;EVM0010683;EVM0002121;EVM0012360;EVM0010368;EVM0014582;EVM0015247;EVM0023007;EVM0005722;EVM0014397;EVM0009331;EVM0014099;EVM0008012;EVM0000221;EVM0011506;EVM…
GO:0009644	response to high light intensity	0	biological_process	EVM0020785;EVM0003460;EVM0003138;EVM0006954;EVM0023381;EVM0021498;EVM0021002;EVM0009859;EVM0010683;EVM0006448;EVM0015640;EVM0005619;EVM0008012;EVM0021781
GO:0009416	response to light stimulus	0	biological_process	EVM0019763;EVM0020785;EVM0003460;EVM0007787;EVM0012145;EVM0020609;EVM0003138;EVM0006954;EVM0023381;EVM0021498;EVM0010517;EVM0021002;EVM0012979;EVM0019225;EVM0013600;EVM0013604;EVM0009859;EVM0013488;EVM0012252;EVM0017589;EVM0010683;EVM0023121;EVM0006448;EVM0015640;EVM0023007;EVM0014397;EVM0005619;EVM0005615;EVM0008012;EVM0021781;EVM0022215;EVM0006185
GO:0044436	thylakoid part	0	cellular_component	EVM0003564;EVM0017271;EVM0021298;EVM0001584;EVM0007787;EVM0004774;EVM0022985;EVM0012145;EVM0000432;EVM0010341;EVM0008786;EVM0004216;EVM0020609;EVM0009426;EVM0011102;EVM0011960;EVM0023381;EVM0007572;EVM0002170;EVM0019546;EVM0018530;EVM0021756;EVM0024661;EVM0000854;EVM0010517;EVM0012878;EVM0012979;EVM0013600;EVM0013604;EVM0017312;EVM0002009;EVM0022879;EVM0001844;EVM0017589;EVM0006280;EVM0002121;EVM…
GO:0009266	response to temperature stimulus	0	biological_process	EVM0013186;EVM0003764;EVM0020785;EVM0003460;EVM0003138;EVM0008567;EVM0004448;EVM0006954;EVM0000577;EVM0004828;EVM0016562;EVM0021498;EVM0003283;EVM0009637;EVM0001459;EVM0010517;EVM0010674;EVM0017982;EVM0017015;EVM0014754;EVM0021002;EVM0019998;EVM0012979;EVM0002943;EVM0017312;EVM0009859;EVM0018355;EVM0013488;EVM0002121;EVM0006448;EVM0004060;EVM0015640;EVM0005722;EVM0005619;EVM0020276;EVM0001830;EVM…
GO:0070271	protein complex biogenesis	0	biological_process	EVM0003138;EVM0006954;EVM0023381;EVM0017865;EVM0021002;EVM0012979;EVM0009859;EVM0006448;EVM0015640;EVM0005725;EVM0007729;EVM0012077;EVM0006811
GO:0006457	protein folding	0	biological_process	EVM0003460;EVM0010341;EVM0003138;EVM0006954;EVM0003283;EVM0010674;EVM0014186;EVM0021002;EVM0009859;EVM0000411;EVM0012360;EVM0006448;EVM0015640;EVM0005725;EVM0003656;EVM0007729;EVM0015281;EVM0021781
GO:0009408	response to heat	0	biological_process	EVM0013186;EVM0003764;EVM0020785;EVM0003460;EVM0003138;EVM0006954;EVM0000577;EVM0004828;EVM0021498;EVM0003283;EVM0009637;EVM0010674;EVM0017982;EVM0014754;EVM0021002;EVM0019998;EVM0002943;EVM0009859;EVM0018355;EVM0006448;EVM0015640;EVM0005619;EVM0020276;EVM0007729;EVM0015281;EVM0021781;EVM0003010;EVM0016092
GO:0009579	thylakoid	0	cellular_component	EVM0003564;EVM0019763;EVM0017271;EVM0021298;EVM0001584;EVM0007787;EVM0004774;EVM0022985;EVM0012145;EVM0000432;EVM0010341;EVM0008786;EVM0004216;EVM0020609;EVM0009426;EVM0011102;EVM0011960;EVM0023381;EVM0007572;EVM0002170;EVM0019546;EVM0018530;EVM0021756;EVM0003679;EVM0024661;EVM0000854;EVM0001459;EVM0010517;EVM0012878;EVM0012979;EVM0013600;EVM0013604;EVM0017312;EVM0013829;EVM0002009;EVM0022879;EVM…
GO:0031975	envelope	0	cellular_component	EVM0003564;EVM0019763;EVM0021298;EVM0002554;EVM0023697;EVM0004216;EVM0020609;EVM0017865;EVM0000371;EVM0019546;EVM0021756;EVM0003679;EVM0024661;EVM0012834;EVM0000854;EVM0001459;EVM0010517;EVM0011174;EVM0012979;EVM0013604;EVM0017312;EVM0022879;EVM0007171;EVM0001844;EVM0017589;EVM0010683;EVM0002121;EVM0012360;EVM0010368;EVM0014582;EVM0016428;EVM0015247;EVM0023007;EVM0005722;EVM0014397;EVM0009331;EVM…
GO:0031967	organelle envelope	0	cellular_component	EVM0003564;EVM0019763;EVM0021298;EVM0002554;EVM0023697;EVM0004216;EVM0020609;EVM0017865;EVM0000371;EVM0019546;EVM0021756;EVM0003679;EVM0024661;EVM0012834;EVM0000854;EVM0001459;EVM0010517;EVM0011174;EVM0012979;EVM0013604;EVM0017312;EVM0022879;EVM0007171;EVM0001844;EVM0017589;EVM0010683;EVM0002121;EVM0012360;EVM0010368;EVM0014582;EVM0016428;EVM0015247;EVM0023007;EVM0005722;EVM0014397;EVM0009331;EVM…
GO:0009532	plastid stroma	0	cellular_component	EVM0003564;EVM0021298;EVM0022985;EVM0012145;EVM0010341;EVM0020609;EVM0011102;EVM0023381;EVM0021756;EVM0018344;EVM0003679;EVM0001459;EVM0010517;EVM0002980;EVM0012878;EVM0012979;EVM0013604;EVM0017312;EVM0012199;EVM0004163;EVM0013829;EVM0022879;EVM0000375;EVM0017589;EVM0002121;EVM0023121;EVM0012360;EVM0014582;EVM0006653;EVM0015247;EVM0003473;EVM0023007;EVM0005722;EVM0009331;EVM0008012;EVM0000221;EVM…
GO:0035966	response to topologically incorrect protein	0	biological_process	EVM0003460;EVM0019432;EVM0003283;EVM0007950;EVM0005619;EVM0007729;EVM0015281
GO:0051259	protein oligomerization	0	biological_process	EVM0003138;EVM0006954;EVM0017865;EVM0021002;EVM0009859;EVM0006448;EVM0015640
GO:0009526	plastid envelope	0	cellular_component	EVM0003564;EVM0019763;EVM0021298;EVM0002554;EVM0023697;EVM0004216;EVM0020609;EVM0000371;EVM0019546;EVM0021756;EVM0003679;EVM0024661;EVM0000854;EVM0001459;EVM0010517;EVM0011174;EVM0012979;EVM0013604;EVM0017312;EVM0022879;EVM0001844;EVM0017589;EVM0010683;EVM0002121;EVM0012360;EVM0010368;EVM0014582;EVM0015247;EVM0023007;EVM0005722;EVM0014397;EVM0009331;EVM0014099;EVM0008012;EVM0000221;EVM0011506;EVM…
GO:0048046	apoplast	0	cellular_component	EVM0016170;EVM0020785;EVM0000349;EVM0022547;EVM0008567;EVM0023381;EVM0006465;EVM0021756;EVM0018344;EVM0021498;EVM0003679;EVM0001459;EVM0010517;EVM0002980;EVM0017015;EVM0014754;EVM0012979;EVM0017312;EVM0012199;EVM0018355;EVM0008248;EVM0017589;EVM0002121;EVM0012360;EVM0014560;EVM0009331;EVM0020276;EVM0000221;EVM0021583;EVM0006525;EVM0009470;EVM0016092;EVM0005487
GO:0031984	organelle subcompartment	0	cellular_component	EVM0003564;EVM0019763;EVM0017271;EVM0021298;EVM0001584;EVM0007787;EVM0004774;EVM0022985;EVM0012145;EVM0000432;EVM0010341;EVM0008786;EVM0004216;EVM0004356;EVM0020609;EVM0009426;EVM0011102;EVM0011960;EVM0023381;EVM0007572;EVM0002170;EVM0019546;EVM0018530;EVM0021756;EVM0003679;EVM0007932;EVM0024661;EVM0000854;EVM0010517;EVM0012628;EVM0000034;EVM0007336;EVM0012878;EVM0012979;EVM0013600;EVM0013604;EVM…
GO:0000302	response to reactive oxygen species	0	biological_process	EVM0013186;EVM0020785;EVM0003460;EVM0007787;EVM0003138;EVM0006954;EVM0021498;EVM0017982;EVM0021002;EVM0009859;EVM0006448;EVM0015640;EVM0005619;EVM0021781;EVM0000941
GO:0010035	response to inorganic substance	0	biological_process	EVM0013186;EVM0006179;EVM0003764;EVM0011755;EVM0020785;EVM0003460;EVM0007787;EVM0022547;EVM0003138;EVM0008305;EVM0007188;EVM0008567;EVM0006954;EVM0016562;EVM0021756;EVM0018344;EVM0021498;EVM0003679;EVM0009637;EVM0001459;EVM0002980;EVM0017982;EVM0000034;EVM0017015;EVM0014754;EVM0021002;EVM0019225;EVM0017312;EVM0012199;EVM0009859;EVM0007171;EVM0018355;EVM0005239;EVM0023121;EVM0006448;EVM0015640;EVM…
GO:0034620	cellular response to unfolded protein	0	biological_process	EVM0003460;EVM0019432;EVM0003283;EVM0007950;EVM0005619;EVM0015281
GO:0035967	cellular response to topologically incorrect protein	0	biological_process	EVM0003460;EVM0019432;EVM0003283;EVM0007950;EVM0005619;EVM0015281
GO:0005576	extracellular region	0	cellular_component	EVM0016170;EVM0020785;EVM0000349;EVM0022547;EVM0010346;EVM0008567;EVM0019432;EVM0023381;EVM0006465;EVM0021756;EVM0018344;EVM0021498;EVM0003679;EVM0003283;EVM0001459;EVM0010517;EVM0002980;EVM0017015;EVM0014754;EVM0012979;EVM0017312;EVM0012199;EVM0018355;EVM0008248;EVM0017589;EVM0002121;EVM0012360;EVM0014560;EVM0009331;EVM0020276;EVM0000221;EVM0015281;EVM0021583;EVM0006525;EVM0009470;EVM0016092;EVM…
GO:0044434	chloroplast part	0	cellular_component	EVM0003564;EVM0019763;EVM0017271;EVM0021298;EVM0001584;EVM0002554;EVM0007787;EVM0004774;EVM0022985;EVM0012145;EVM0000432;EVM0023697;EVM0010341;EVM0008786;EVM0004216;EVM0020609;EVM0009426;EVM0011102;EVM0011960;EVM0023381;EVM0007572;EVM0002170;EVM0000371;EVM0019546;EVM0018530;EVM0021756;EVM0018344;EVM0003679;EVM0024661;EVM0000854;EVM0001459;EVM0010517;EVM0002980;EVM0011174;EVM0012878;EVM0012979;EVM…
GO:0009628	response to abiotic stimulus	0	biological_process	EVM0013186;EVM0003764;EVM0011755;EVM0019763;EVM0020588;EVM0021298;EVM0020785;EVM0003460;EVM0007787;EVM0012145;EVM0022547;EVM0020609;EVM0003138;EVM0007188;EVM0008567;EVM0004448;EVM0006954;EVM0023381;EVM0000577;EVM0004828;EVM0016562;EVM0021498;EVM0003283;EVM0009637;EVM0001459;EVM0010517;EVM0002980;EVM0010674;EVM0017982;EVM0017015;EVM0014754;EVM0021002;EVM0019998;EVM0012979;EVM0016432;EVM0019225;EVM…
GO:0009570	chloroplast stroma	0	cellular_component	EVM0003564;EVM0021298;EVM0022985;EVM0012145;EVM0010341;EVM0020609;EVM0011102;EVM0023381;EVM0021756;EVM0018344;EVM0003679;EVM0001459;EVM0010517;EVM0002980;EVM0012878;EVM0012979;EVM0013604;EVM0017312;EVM0012199;EVM0004163;EVM0013829;EVM0022879;EVM0000375;EVM0017589;EVM0002121;EVM0023121;EVM0012360;EVM0014582;EVM0006653;EVM0015247;EVM0003473;EVM0023007;EVM0005722;EVM0009331;EVM0008012;EVM0000221;EVM…
GO:0044435	plastid part	0	cellular_component	EVM0003564;EVM0019763;EVM0017271;EVM0021298;EVM0001584;EVM0002554;EVM0007787;EVM0004774;EVM0022985;EVM0012145;EVM0000432;EVM0023697;EVM0010341;EVM0008786;EVM0004216;EVM0020609;EVM0009426;EVM0011102;EVM0011960;EVM0023381;EVM0007572;EVM0002170;EVM0000371;EVM0019546;EVM0018530;EVM0021756;EVM0018344;EVM0003679;EVM0024661;EVM0000854;EVM0001459;EVM0010517;EVM0002980;EVM0011174;EVM0012878;EVM0012979;EVM…
GO:0009507	chloroplast	0	cellular_component	EVM0006179;EVM0003564;EVM0019763;EVM0017271;EVM0021298;EVM0001584;EVM0002554;EVM0007787;EVM0004774;EVM0022985;EVM0012145;EVM0000349;EVM0022547;EVM0000432;EVM0023697;EVM0010341;EVM0008786;EVM0004216;EVM0020609;EVM0009426;EVM0011102;EVM0007188;EVM0011960;EVM0008567;EVM0023381;EVM0007572;EVM0013566;EVM0002170;EVM0000371;EVM0019546;EVM0016967;EVM0018530;EVM0021756;EVM0018344;EVM0003679;EVM0024661;EVM…
GO:0006950	response to stress	0	biological_process	EVM0013186;EVM0003764;EVM0011755;EVM0017271;EVM0020588;EVM0020785;EVM0003460;EVM0007787;EVM0022547;EVM0010346;EVM0003138;EVM0007188;EVM0008567;EVM0006954;EVM0019432;EVM0023381;EVM0000577;EVM0000274;EVM0007346;EVM0004828;EVM0016562;EVM0021498;EVM0003283;EVM0009637;EVM0001459;EVM0010517;EVM0002980;EVM0010674;EVM0017982;EVM0017015;EVM0019923;EVM0014186;EVM0014754;EVM0021002;EVM0019998;EVM0012979;EVM…
GO:0044446	intracellular organelle part	0	cellular_component	EVM0001262;EVM0003564;EVM0019763;EVM0017271;EVM0021298;EVM0012920;EVM0020785;EVM0001584;EVM0002554;EVM0007787;EVM0004774;EVM0010507;EVM0022985;EVM0012145;EVM0022547;EVM0000432;EVM0023697;EVM0010341;EVM0008786;EVM0004216;EVM0004356;EVM0020609;EVM0006989;EVM0009426;EVM0011102;EVM0011960;EVM0008567;EVM0019432;EVM0023381;EVM0007572;EVM0007916;EVM0010817;EVM0002170;EVM0017865;EVM0000371;EVM0019546;EVM…
GO:0044422	organelle part	0	cellular_component	EVM0001262;EVM0003564;EVM0019763;EVM0017271;EVM0021298;EVM0012920;EVM0020785;EVM0001584;EVM0002554;EVM0007787;EVM0004774;EVM0010507;EVM0022985;EVM0012145;EVM0022547;EVM0000432;EVM0023697;EVM0010341;EVM0008786;EVM0004216;EVM0004356;EVM0020609;EVM0006989;EVM0009426;EVM0011102;EVM0011960;EVM0008567;EVM0019432;EVM0023381;EVM0007572;EVM0007916;EVM0010817;EVM0002170;EVM0017865;EVM0000371;EVM0019546;EVM…
GO:0016020	membrane	0	cellular_component	EVM0004250;EVM0015770;EVM0001262;EVM0003564;EVM0019763;EVM0017271;EVM0021298;EVM0022647;EVM0012920;EVM0008269;EVM0020785;EVM0012336;EVM0001584;EVM0002554;EVM0007787;EVM0004774;EVM0010507;EVM0012145;EVM0022547;EVM0023697;EVM0007153;EVM0010341;EVM0008786;EVM0004216;EVM0004356;EVM0020609;EVM0006989;EVM0009426;EVM0011102;EVM0015617;EVM0001953;EVM0007188;EVM0011960;EVM0008567;EVM0019432;EVM0023381;EVM…
GO:0009536	plastid	0	cellular_component	EVM0006179;EVM0003564;EVM0019763;EVM0017271;EVM0021298;EVM0001584;EVM0002554;EVM0007787;EVM0004774;EVM0022985;EVM0012145;EVM0000349;EVM0022547;EVM0000432;EVM0023697;EVM0010341;EVM0008786;EVM0004216;EVM0020609;EVM0009426;EVM0011102;EVM0007188;EVM0011960;EVM0008567;EVM0023381;EVM0007572;EVM0013566;EVM0002170;EVM0000371;EVM0019546;EVM0016967;EVM0018530;EVM0021756;EVM0018344;EVM0003679;EVM0024661;EVM…
GO:0005737	cytoplasm	0	cellular_component	EVM0013186;EVM0001640;EVM0022431;EVM0006179;EVM0003764;EVM0001262;EVM0003561;EVM0003564;EVM0019763;EVM0017271;EVM0020588;EVM0021298;EVM0022646;EVM0016170;EVM0012920;EVM0005950;EVM0009602;EVM0020785;EVM0003460;EVM0012336;EVM0001584;EVM0002554;EVM0014649;EVM0007787;EVM0004774;EVM0010507;EVM0005326;EVM0022985;EVM0012145;EVM0000349;EVM0022547;EVM0000432;EVM0023697;EVM0020160;EVM0010346;EVM0014316;EVM…
GO:0044444	cytoplasmic part	0	cellular_component	EVM0001640;EVM0006179;EVM0003764;EVM0001262;EVM0003564;EVM0019763;EVM0017271;EVM0020588;EVM0021298;EVM0016170;EVM0012920;EVM0005950;EVM0020785;EVM0003460;EVM0012336;EVM0001584;EVM0002554;EVM0014649;EVM0007787;EVM0004774;EVM0010507;EVM0022985;EVM0012145;EVM0000349;EVM0022547;EVM0000432;EVM0023697;EVM0020160;EVM0010346;EVM0014316;EVM0010341;EVM0008786;EVM0004216;EVM0004356;EVM0020609;EVM0006989;EVM…
GO:0043229	intracellular organelle	0	cellular_component	EVM0013186;EVM0001640;EVM0001086;EVM0009694;EVM0006179;EVM0003764;EVM0001262;EVM0003561;EVM0003564;EVM0019763;EVM0017271;EVM0021298;EVM0012920;EVM0005950;EVM0009602;EVM0020785;EVM0003460;EVM0012336;EVM0001584;EVM0002554;EVM0004676;EVM0007787;EVM0004774;EVM0010507;EVM0022822;EVM0005326;EVM0022985;EVM0012145;EVM0000349;EVM0022547;EVM0000432;EVM0023697;EVM0014086;EVM0010346;EVM0010341;EVM0008786;EVM…
GO:0043226	organelle	0	cellular_component	EVM0013186;EVM0001640;EVM0001086;EVM0009694;EVM0006179;EVM0003764;EVM0001262;EVM0003561;EVM0003564;EVM0019763;EVM0017271;EVM0021298;EVM0012920;EVM0005950;EVM0009602;EVM0020785;EVM0003460;EVM0012336;EVM0001584;EVM0002554;EVM0004676;EVM0007787;EVM0004774;EVM0010507;EVM0022822;EVM0005326;EVM0022985;EVM0012145;EVM0000349;EVM0022547;EVM0000432;EVM0023697;EVM0014086;EVM0010346;EVM0010341;EVM0008786;EVM…
GO:0050896	response to stimulus	0	biological_process	EVM0013186;EVM0009694;EVM0006179;EVM0003764;EVM0011755;EVM0003561;EVM0019763;EVM0017271;EVM0020588;EVM0021298;EVM0005950;EVM0020785;EVM0003460;EVM0007787;EVM0012145;EVM0022547;EVM0010346;EVM0020609;EVM0003138;EVM0008305;EVM0007188;EVM0008567;EVM0004448;EVM0006954;EVM0019432;EVM0023381;EVM0000577;EVM0020208;EVM0006465;EVM0017881;EVM0007916;EVM0000274;EVM0007346;EVM0004828;EVM0016562;EVM0021756;EVM…
GO:0006984	ER-nucleus signaling pathway	0	biological_process	EVM0019432;EVM0003283;EVM0007171;EVM0007950;EVM0015281
GO:0005575	cellular_component	0	cellular_component	EVM0013186;EVM0001640;EVM0001086;EVM0004250;EVM0009694;EVM0015770;EVM0022431;EVM0006179;EVM0003764;EVM0001262;EVM0003561;EVM0003564;EVM0019763;EVM0017271;EVM0020588;EVM0021298;EVM0022646;EVM0022647;EVM0016170;EVM0012920;EVM0005950;EVM0008269;EVM0009602;EVM0020785;EVM0003460;EVM0012336;EVM0001584;EVM0002554;EVM0014649;EVM0004676;EVM0007787;EVM0004774;EVM0010507;EVM0022822;EVM0005326;EVM0022985;EVM…
GO:0043231	intracellular membrane-bounded organelle	0	cellular_component	EVM0013186;EVM0001640;EVM0001086;EVM0009694;EVM0006179;EVM0003764;EVM0001262;EVM0003561;EVM0003564;EVM0019763;EVM0017271;EVM0021298;EVM0012920;EVM0005950;EVM0009602;EVM0020785;EVM0003460;EVM0012336;EVM0001584;EVM0002554;EVM0004676;EVM0007787;EVM0004774;EVM0010507;EVM0022822;EVM0005326;EVM0022985;EVM0012145;EVM0000349;EVM0022547;EVM0000432;EVM0023697;EVM0014086;EVM0010346;EVM0010341;EVM0008786;EVM…
GO:0043227	membrane-bounded organelle	0	cellular_component	EVM0013186;EVM0001640;EVM0001086;EVM0009694;EVM0006179;EVM0003764;EVM0001262;EVM0003561;EVM0003564;EVM0019763;EVM0017271;EVM0021298;EVM0012920;EVM0005950;EVM0009602;EVM0020785;EVM0003460;EVM0012336;EVM0001584;EVM0002554;EVM0004676;EVM0007787;EVM0004774;EVM0010507;EVM0022822;EVM0005326;EVM0022985;EVM0012145;EVM0000349;EVM0022547;EVM0000432;EVM0023697;EVM0014086;EVM0010346;EVM0010341;EVM0008786;EVM…
GO:0006461	protein complex assembly	0	biological_process	EVM0003138;EVM0006954;EVM0023381;EVM0017865;EVM0021002;EVM0009859;EVM0006448;EVM0015640;EVM0005725;EVM0007729;EVM0012077;EVM0006811
GO:0005623	cell	0	cellular_component	EVM0013186;EVM0001640;EVM0001086;EVM0004250;EVM0009694;EVM0015770;EVM0022431;EVM0006179;EVM0003764;EVM0001262;EVM0003561;EVM0003564;EVM0019763;EVM0017271;EVM0020588;EVM0021298;EVM0022646;EVM0022647;EVM0016170;EVM0012920;EVM0005950;EVM0009602;EVM0020785;EVM0003460;EVM0012336;EVM0001584;EVM0002554;EVM0014649;EVM0004676;EVM0007787;EVM0004774;EVM0010507;EVM0022822;EVM0005326;EVM0022985;EVM0012145;EVM…
GO:0044464	cell part	0	cellular_component	EVM0013186;EVM0001640;EVM0001086;EVM0004250;EVM0009694;EVM0015770;EVM0022431;EVM0006179;EVM0003764;EVM0001262;EVM0003561;EVM0003564;EVM0019763;EVM0017271;EVM0020588;EVM0021298;EVM0022646;EVM0022647;EVM0016170;EVM0012920;EVM0005950;EVM0009602;EVM0020785;EVM0003460;EVM0012336;EVM0001584;EVM0002554;EVM0014649;EVM0004676;EVM0007787;EVM0004774;EVM0010507;EVM0022822;EVM0005326;EVM0022985;EVM0012145;EVM…
GO:0005622	intracellular	0	cellular_component	EVM0013186;EVM0001640;EVM0001086;EVM0009694;EVM0022431;EVM0006179;EVM0003764;EVM0001262;EVM0003561;EVM0003564;EVM0019763;EVM0017271;EVM0020588;EVM0021298;EVM0022646;EVM0016170;EVM0012920;EVM0005950;EVM0009602;EVM0020785;EVM0003460;EVM0012336;EVM0001584;EVM0002554;EVM0014649;EVM0004676;EVM0007787;EVM0004774;EVM0010507;EVM0022822;EVM0005326;EVM0022985;EVM0012145;EVM0000349;EVM0022547;EVM0000432;EVM…
GO:0044424	intracellular part	0	cellular_component	EVM0013186;EVM0001640;EVM0001086;EVM0009694;EVM0022431;EVM0006179;EVM0003764;EVM0001262;EVM0003561;EVM0003564;EVM0019763;EVM0017271;EVM0020588;EVM0021298;EVM0022646;EVM0016170;EVM0012920;EVM0005950;EVM0009602;EVM0020785;EVM0003460;EVM0012336;EVM0001584;EVM0002554;EVM0014649;EVM0004676;EVM0007787;EVM0004774;EVM0010507;EVM0022822;EVM0005326;EVM0022985;EVM0012145;EVM0000349;EVM0022547;EVM0000432;EVM…
GO:0010187	negative regulation of seed germination	0.002	biological_process	EVM0014754;EVM0019998;EVM0018355;EVM0020276;EVM0016092
GO:0065003	macromolecular complex assembly	0.004	biological_process	EVM0003138;EVM0006954;EVM0023381;EVM0017865;EVM0021002;EVM0009859;EVM0006448;EVM0015640;EVM0005725;EVM0013354;EVM0007729;EVM0012077;EVM0006811
GO:0060904	regulation of protein folding in endoplasmic reticulum	0.006	biological_process	EVM0019432;EVM0003283;EVM0015281
GO:0021680	cerebellar Purkinje cell layer development	0.006	biological_process	EVM0019432;EVM0003283;EVM0015281
GO:0030902	hindbrain development	0.006	biological_process	EVM0019432;EVM0003283;EVM0015281
GO:0021577	hindbrain structural organization	0.006	biological_process	EVM0019432;EVM0003283;EVM0015281
GO:0021575	hindbrain morphogenesis	0.006	biological_process	EVM0019432;EVM0003283;EVM0015281
GO:0034663	endoplasmic reticulum chaperone complex	0.006	cellular_component	EVM0019432;EVM0003283;EVM0015281
GO:0021695	cerebellar cortex development	0.006	biological_process	EVM0019432;EVM0003283;EVM0015281
GO:0021587	cerebellum morphogenesis	0.006	biological_process	EVM0019432;EVM0003283;EVM0015281
GO:0021589	cerebellum structural organization	0.006	biological_process	EVM0019432;EVM0003283;EVM0015281
GO:0021549	cerebellum development	0.006	biological_process	EVM0019432;EVM0003283;EVM0015281
GO:0022037	metencephalon development	0.006	biological_process	EVM0019432;EVM0003283;EVM0015281
GO:0010218	response to far red light	0.008	biological_process	EVM0012145;EVM0020609;EVM0012979;EVM0013604;EVM0012252;EVM0017589;EVM0006185
GO:0042221	response to chemical	0.008	biological_process	EVM0013186;EVM0009694;EVM0006179;EVM0003764;EVM0011755;EVM0003561;EVM0005950;EVM0020785;EVM0003460;EVM0007787;EVM0022547;EVM0003138;EVM0008305;EVM0007188;EVM0008567;EVM0006954;EVM0019432;EVM0020208;EVM0016562;EVM0021756;EVM0018344;EVM0021498;EVM0003679;EVM0003283;EVM0009637;EVM0001459;EVM0010517;EVM0002980;EVM0017982;EVM0000034;EVM0017015;EVM0003108;EVM0014754;EVM0021002;EVM0019998;EVM0019225;EVM…
GO:0006091	generation of precursor metabolites and energy	0.008	biological_process	EVM0014316;EVM0010341;EVM0023381;EVM0002170;EVM0013604;EVM0010386;EVM0005722;EVM0014397;EVM0014099;EVM0021583;EVM0006811;EVM0006185
GO:0009521	photosystem	0.008	cellular_component	EVM0012145;EVM0023381;EVM0014099;EVM0018982
GO:0009986	cell surface	0.008	cellular_component	EVM0019432;EVM0007346;EVM0003283;EVM0007729;EVM0015281
GO:0044403	symbiosis, encompassing mutualism through parasitism	0.01	biological_process	EVM0020785;EVM0010346;EVM0007916;EVM0000274;EVM0021498;EVM0014754;EVM0005843;EVM0018355;EVM0004060;EVM0020276;EVM0016092
GO:0044432	endoplasmic reticulum part	0.012	cellular_component	EVM0012920;EVM0022547;EVM0004356;EVM0006989;EVM0008567;EVM0019432;EVM0007916;EVM0003283;EVM0017015;EVM0014186;EVM0017098;EVM0003037;EVM0000564;EVM0004717;EVM0007171;EVM0015065;EVM0023316;EVM0007950;EVM0015281
GO:0009615	response to virus	0.014	biological_process	EVM0020785;EVM0000274;EVM0021498;EVM0014754;EVM0018355;EVM0004060;EVM0020276;EVM0016092
GO:0044419	interspecies interaction between organisms	0.018	biological_process	EVM0020785;EVM0010346;EVM0007916;EVM0000274;EVM0021498;EVM0014754;EVM0005843;EVM0018355;EVM0004060;EVM0020276;EVM0016092
GO:0071216	cellular response to biotic stimulus	0.018	biological_process	EVM0019432;EVM0003283;EVM0007171;EVM0015281
GO:0044425	membrane part	0.024	cellular_component	EVM0004250;EVM0015770;EVM0012920;EVM0012145;EVM0007153;EVM0004356;EVM0006989;EVM0001953;EVM0019432;EVM0023381;EVM0010817;EVM0017865;EVM0007346;EVM0007932;EVM0003283;EVM0008471;EVM0014186;EVM0013600;EVM0017098;EVM0000564;EVM0004717;EVM0007171;EVM0012252;EVM0015065;EVM0016946;EVM0023316;EVM0007950;EVM0014099;EVM0007729;EVM0015281;EVM0021583;EVM0002293;EVM0012077;EVM0018982;EVM0013026;EVM0006185
GO:0042742	defense response to bacterium	0.024	biological_process	EVM0010346;EVM0023381;EVM0000274;EVM0010517;EVM0019923;EVM0014186;EVM0014754;EVM0019998;EVM0018355;EVM0002121;EVM0000252;EVM0005722;EVM0014397;EVM0020276;EVM0021583;EVM0016092
GO:0006979	response to oxidative stress	0.024	biological_process	EVM0013186;EVM0017271;EVM0020785;EVM0003460;EVM0007787;EVM0022547;EVM0003138;EVM0006954;EVM0021498;EVM0002980;EVM0017982;EVM0021002;EVM0009859;EVM0006448;EVM0015640;EVM0023007;EVM0005619;EVM0021781;EVM0000941
GO:0090332	stomatal closure	0.026	biological_process	EVM0014754;EVM0018355;EVM0020276;EVM0016092
GO:0098807	chloroplast thylakoid membrane protein complex	0.026	cellular_component	EVM0012145;EVM0013600;EVM0014099;EVM0006185
GO:0002576	platelet degranulation	0.034	biological_process	EVM0019432;EVM0003283;EVM0015281
GO:0030168	platelet activation	0.034	biological_process	EVM0019432;EVM0003283;EVM0015281
GO:1903332	regulation of protein folding	0.034	biological_process	EVM0019432;EVM0003283;EVM0015281
GO:0009523	photosystem II	0.034	cellular_component	EVM0012145;EVM0023381;EVM0018982
GO:0006970	response to osmotic stress	0.048	biological_process	EVM0003764;EVM0011755;EVM0020588;EVM0022547;EVM0003138;EVM0008567;EVM0006954;EVM0000577;EVM0004828;EVM0016562;EVM0017015;EVM0021002;EVM0019225;EVM0000564;EVM0009859;EVM0006448;EVM0009581;EVM0022426;EVM0015640;EVM0023007;EVM0005725;EVM0007729;EVM0021781;EVM0000941
GO:0010114	response to red light	0.05	biological_process	EVM0012145;EVM0020609;EVM0012979;EVM0013604;EVM0012252;EVM0017589;EVM0006185
GO:0005488	binding	0.05	molecular_function	EVM0003561;EVM0020785;EVM0003460;EVM0022822;EVM0022547;EVM0020160;EVM0015617;EVM0004448;EVM0019432;EVM0023381;EVM0000577;EVM0006465;EVM0007572;EVM0010817;EVM0007346;EVM0019546;EVM0016562;EVM0021498;EVM0003679;EVM0003283;EVM0009637;EVM0010517;EVM0002980;EVM0004440;EVM0004768;EVM0016615;EVM0010674;EVM0011000;EVM0012979;EVM0019225;EVM0013600;EVM0017312;EVM0013827;EVM0005590;EVM0013488;EVM0017589;EVM…
GO:0009306	protein secretion	0.052	biological_process	EVM0008567;EVM0003283;EVM0017015;EVM0015281
GO:0046906	tetrapyrrole binding	0.052	molecular_function	EVM0007572;EVM0013600;EVM0017589;EVM0006185
GO:0002790	peptide secretion	0.052	biological_process	EVM0008567;EVM0003283;EVM0017015;EVM0015281
GO:0044237	cellular metabolic process	0.054	biological_process	EVM0020588;EVM0012920;EVM0020785;EVM0003460;EVM0002554;EVM0014649;EVM0012145;EVM0020160;EVM0014316;EVM0010341;EVM0003138;EVM0013332;EVM0006954;EVM0019432;EVM0023381;EVM0010817;EVM0002170;EVM0000274;EVM0017865;EVM0016562;EVM0018344;EVM0004852;EVM0024461;EVM0021498;EVM0003679;EVM0003283;EVM0002457;EVM0002980;EVM0007794;EVM0002517;EVM0004768;EVM0016615;EVM0010674;EVM0019923;EVM0014186;EVM0024542;EVM…
GO:0032940	secretion by cell	0.054	biological_process	EVM0008567;EVM0019432;EVM0003283;EVM0017015;EVM0015281
GO:0031978	plastid thylakoid lumen	0.056	cellular_component	EVM0004774;EVM0022985;EVM0000432;EVM0023381;EVM0023121;EVM0014582;EVM0021583
GO:0009543	chloroplast thylakoid lumen	0.056	cellular_component	EVM0004774;EVM0022985;EVM0000432;EVM0023381;EVM0023121;EVM0014582;EVM0021583
GO:1901363	heterocyclic compound binding	0.056	molecular_function	EVM0020785;EVM0003460;EVM0022822;EVM0020160;EVM0015617;EVM0004448;EVM0023381;EVM0007572;EVM0019546;EVM0016562;EVM0021498;EVM0003679;EVM0009637;EVM0010517;EVM0004440;EVM0016615;EVM0010674;EVM0011000;EVM0019225;EVM0013600;EVM0005590;EVM0013488;EVM0017589;EVM0022630;EVM0013354;EVM0007729;EVM0021583;EVM0006811;EVM0006185;EVM0001889
GO:0030968	endoplasmic reticulum unfolded protein response	0.066	biological_process	EVM0019432;EVM0003283;EVM0007950;EVM0015281
GO:0030176	integral component of endoplasmic reticulum membrane	0.066	cellular_component	EVM0019432;EVM0003283;EVM0007950;EVM0015281
GO:0031227	intrinsic component of endoplasmic reticulum membrane	0.066	cellular_component	EVM0019432;EVM0003283;EVM0007950;EVM0015281
GO:0030674	protein binding, bridging	0.072	molecular_function	EVM0019432;EVM0003283;EVM0015281
GO:0017015	regulation of transforming growth factor beta receptor signaling pathway	0.072	biological_process	EVM0019432;EVM0003283;EVM0015281
GO:0006887	exocytosis	0.072	biological_process	EVM0019432;EVM0003283;EVM0015281
GO:0030512	negative regulation of transforming growth factor beta receptor signaling pathway	0.072	biological_process	EVM0019432;EVM0003283;EVM0015281
GO:0040019	positive regulation of embryonic development	0.072	biological_process	EVM0019432;EVM0003283;EVM0015281
GO:1903845	negative regulation of cellular response to transforming growth factor beta stimulus	0.072	biological_process	EVM0019432;EVM0003283;EVM0015281
GO:1903844	regulation of cellular response to transforming growth factor beta stimulus	0.072	biological_process	EVM0019432;EVM0003283;EVM0015281
GO:0010196	nonphotochemical quenching	0.072	biological_process	EVM0012145;EVM0013600;EVM0014397
GO:0090101	negative regulation of transmembrane receptor protein serine/threonine kinase signaling pathway	0.072	biological_process	EVM0019432;EVM0003283;EVM0015281
GO:0030076	light-harvesting complex	0.072	cellular_component	EVM0012145;EVM0013600;EVM0006185
GO:0043022	ribosome binding	0.072	molecular_function	EVM0019432;EVM0003283;EVM0015281
GO:0009503	thylakoid light-harvesting complex	0.072	cellular_component	EVM0012145;EVM0013600;EVM0006185
GO:1990066	energy quenching	0.072	biological_process	EVM0012145;EVM0013600;EVM0014397
GO:0042149	cellular response to glucose starvation	0.072	biological_process	EVM0019432;EVM0003283;EVM0015281
GO:0045055	regulated exocytosis	0.072	biological_process	EVM0019432;EVM0003283;EVM0015281
GO:0097159	organic cyclic compound binding	0.082	molecular_function	EVM0020785;EVM0003460;EVM0022822;EVM0020160;EVM0015617;EVM0004448;EVM0023381;EVM0007572;EVM0019546;EVM0016562;EVM0021498;EVM0003679;EVM0009637;EVM0010517;EVM0004440;EVM0016615;EVM0010674;EVM0011000;EVM0019225;EVM0013600;EVM0005590;EVM0013488;EVM0017589;EVM0022630;EVM0013354;EVM0007729;EVM0021583;EVM0006811;EVM0006185;EVM0001889
GO:0046903	secretion	0.086	biological_process	EVM0008567;EVM0019432;EVM0003283;EVM0017015;EVM0015281
GO:0008150	biological_process	0.088	biological_process	EVM0013186;EVM0001086;EVM0004250;EVM0009694;EVM0006179;EVM0003764;EVM0011755;EVM0003561;EVM0019763;EVM0017271;EVM0020588;EVM0021298;EVM0012920;EVM0005950;EVM0020785;EVM0003460;EVM0002554;EVM0014649;EVM0004676;EVM0007787;EVM0010507;EVM0005326;EVM0012145;EVM0000349;EVM0022547;EVM0020160;EVM0010346;EVM0014316;EVM0010341;EVM0020609;EVM0001167;EVM0003138;EVM0001953;EVM0008305;EVM0007188;EVM0013332;EVM…
GO:0043933	macromolecular complex subunit organization	0.102	biological_process	EVM0003138;EVM0006954;EVM0023381;EVM0017865;EVM0024542;EVM0021002;EVM0009859;EVM0006448;EVM0015640;EVM0005725;EVM0013354;EVM0007729;EVM0012077;EVM0006811
GO:0034976	response to endoplasmic reticulum stress	0.104	biological_process	EVM0019432;EVM0003283;EVM0007171;EVM0007950;EVM0015281
GO:0071822	protein complex subunit organization	0.11	biological_process	EVM0003138;EVM0006954;EVM0023381;EVM0017865;EVM0024542;EVM0021002;EVM0009859;EVM0006448;EVM0015640;EVM0005725;EVM0007729;EVM0012077;EVM0006811
GO:0008152	metabolic process	0.11	biological_process	EVM0020588;EVM0012920;EVM0020785;EVM0003460;EVM0002554;EVM0014649;EVM0005326;EVM0012145;EVM0000349;EVM0020160;EVM0014316;EVM0010341;EVM0003138;EVM0013332;EVM0006954;EVM0019432;EVM0023381;EVM0010817;EVM0002170;EVM0000274;EVM0017865;EVM0019546;EVM0016967;EVM0016562;EVM0021756;EVM0018344;EVM0004852;EVM0024461;EVM0021498;EVM0003679;EVM0007932;EVM0024661;EVM0003283;EVM0002457;EVM0002980;EVM0007794;EVM…
GO:0009987	cellular process	0.11	biological_process	EVM0004250;EVM0003561;EVM0019763;EVM0020588;EVM0012920;EVM0020785;EVM0003460;EVM0002554;EVM0014649;EVM0010507;EVM0012145;EVM0020160;EVM0014316;EVM0010341;EVM0003138;EVM0001953;EVM0007188;EVM0013332;EVM0008567;EVM0004448;EVM0006954;EVM0019432;EVM0023381;EVM0020208;EVM0006465;EVM0017881;EVM0010817;EVM0002170;EVM0000274;EVM0017865;EVM0007346;EVM0009327;EVM0016562;EVM0018344;EVM0004852;EVM0024461;EVM…
GO:0090092	regulation of transmembrane receptor protein serine/threonine kinase signaling pathway	0.144	biological_process	EVM0019432;EVM0003283;EVM0015281
GO:0043021	ribonucleoprotein complex binding	0.144	molecular_function	EVM0019432;EVM0003283;EVM0015281
GO:0060090	binding, bridging	0.144	molecular_function	EVM0019432;EVM0003283;EVM0015281
GO:0009617	response to bacterium	0.172	biological_process	EVM0020785;EVM0010346;EVM0023381;EVM0000274;EVM0021498;EVM0010517;EVM0019923;EVM0014186;EVM0014754;EVM0019998;EVM0018355;EVM0002121;EVM0000252;EVM0005722;EVM0014397;EVM0020276;EVM0021583;EVM0016092
GO:0016032	viral process	0.178	biological_process	EVM0020785;EVM0000274;EVM0021498;EVM0014754;EVM0005843;EVM0018355;EVM0004060;EVM0020276;EVM0016092
GO:0043069	negative regulation of programmed cell death	0.206	biological_process	EVM0019432;EVM0003283;EVM0007171;EVM0019370;EVM0007729;EVM0015281
GO:0090287	regulation of cellular response to growth factor stimulus	0.236	biological_process	EVM0019432;EVM0003283;EVM0015281
GO:0090288	negative regulation of cellular response to growth factor stimulus	0.236	biological_process	EVM0019432;EVM0003283;EVM0015281
GO:0007420	brain development	0.236	biological_process	EVM0019432;EVM0003283;EVM0015281
GO:0051297	centrosome organization	0.278	biological_process	EVM0003283;EVM0011000;EVM0007729;EVM0015281
GO:0007098	centrosome cycle	0.278	biological_process	EVM0003283;EVM0011000;EVM0007729;EVM0015281
GO:0009765	photosynthesis, light harvesting	0.278	biological_process	EVM0010341;EVM0002170;EVM0013604;EVM0006185
GO:0031023	microtubule organizing center organization	0.278	biological_process	EVM0003283;EVM0011000;EVM0007729;EVM0015281
GO:0009637	response to blue light	0.288	biological_process	EVM0012145;EVM0020609;EVM0012979;EVM0013604;EVM0017589;EVM0006185
GO:0005774	vacuolar membrane	0.298	cellular_component	EVM0001262;EVM0020785;EVM0010507;EVM0022547;EVM0020609;EVM0008567;EVM0010817;EVM0018344;EVM0021498;EVM0002980;EVM0002517;EVM0012628;EVM0010674;EVM0017015;EVM0014754;EVM0012199;EVM0003037;EVM0004717;EVM0018355;EVM0017589;EVM0008861;EVM0008448;EVM0023316;EVM0020276;EVM0018529;EVM0016092
GO:0052510	positive regulation by organism of defense response of other organism involved in symbiotic interaction	0.308	biological_process	EVM0010346;EVM0007916
GO:0006880	intracellular sequestering of iron ion	0.308	biological_process	EVM0010507;EVM0008448
GO:0097577	sequestering of iron ion	0.308	biological_process	EVM0010507;EVM0008448
GO:0052257	pathogen-associated molecular pattern dependent induction by organism of innate immune response of other organism involved in symbiotic interaction	0.308	biological_process	EVM0010346;EVM0007916
GO:0052033	pathogen-associated molecular pattern dependent induction by symbiont of host innate immune response	0.308	biological_process	EVM0010346;EVM0007916
GO:0052306	modulation by organism of innate immune response in other organism involved in symbiotic interaction	0.308	biological_process	EVM0010346;EVM0007916
GO:0052305	positive regulation by organism of innate immune response in other organism involved in symbiotic interaction	0.308	biological_process	EVM0010346;EVM0007916
GO:0052308	pathogen-associated molecular pattern dependent modulation by organism of innate immune response in other organism involved in symbiotic interaction	0.308	biological_process	EVM0010346;EVM0007916
GO:0052509	positive regulation by symbiont of host defense response	0.308	biological_process	EVM0010346;EVM0007916
GO:0052166	positive regulation by symbiont of host innate immune response	0.308	biological_process	EVM0010346;EVM0007916
GO:0052167	modulation by symbiont of host innate immune response	0.308	biological_process	EVM0010346;EVM0007916
GO:0052169	pathogen-associated molecular pattern dependent modulation by symbiont of host innate immune response	0.308	biological_process	EVM0010346;EVM0007916
GO:0060548	negative regulation of cell death	0.5	biological_process	EVM0019432;EVM0003283;EVM0007171;EVM0019370;EVM0007729;EVM0015281
GO:0050817	coagulation	0.5	biological_process	EVM0019432;EVM0003283;EVM0015281
GO:0001775	cell activation	0.5	biological_process	EVM0019432;EVM0003283;EVM0015281
GO:0032075	positive regulation of nuclease activity	0.5	biological_process	EVM0019432;EVM0003283;EVM0015281
GO:0006987	activation of signaling protein activity involved in unfolded protein response	0.5	biological_process	EVM0019432;EVM0003283;EVM0015281
GO:0032069	regulation of nuclease activity	0.5	biological_process	EVM0019432;EVM0003283;EVM0015281
GO:0007599	hemostasis	0.5	biological_process	EVM0019432;EVM0003283;EVM0015281
GO:0007596	blood coagulation	0.5	biological_process	EVM0019432;EVM0003283;EVM0015281
GO:0007417	central nervous system development	0.5	biological_process	EVM0019432;EVM0003283;EVM0015281
GO:0045995	regulation of embryonic development	0.5	biological_process	EVM0019432;EVM0003283;EVM0015281
GO:0051235	maintenance of location	0.532	biological_process	EVM0010507;EVM0003283;EVM0008448;EVM0009581;EVM0015281
GO:0009409	response to cold	0.54	biological_process	EVM0008567;EVM0016562;EVM0001459;EVM0010517;EVM0017015;EVM0014754;EVM0012979;EVM0017312;EVM0018355;EVM0002121;EVM0004060;EVM0005722;EVM0020276;EVM0001830;EVM0007729;EVM0016092
GO:0009651	response to salt stress	0.556	biological_process	EVM0011755;EVM0020588;EVM0022547;EVM0003138;EVM0008567;EVM0006954;EVM0000577;EVM0016562;EVM0017015;EVM0021002;EVM0019225;EVM0000564;EVM0009859;EVM0006448;EVM0009581;EVM0022426;EVM0015640;EVM0023007;EVM0007729;EVM0000941
GO:0051787	misfolded protein binding	0.558	molecular_function	EVM0019432;EVM0003283;EVM0015281
GO:1903322	positive regulation of protein modification by small protein conjugation or removal	0.558	biological_process	EVM0019432;EVM0003283;EVM0015281
GO:0042060	wound healing	0.558	biological_process	EVM0019432;EVM0003283;EVM0015281
GO:0030496	midbody	0.558	cellular_component	EVM0019432;EVM0003283;EVM0015281
GO:0031398	positive regulation of protein ubiquitination	0.558	biological_process	EVM0019432;EVM0003283;EVM0015281
GO:0044437	vacuolar part	0.588	cellular_component	EVM0001262;EVM0020785;EVM0010507;EVM0022547;EVM0020609;EVM0008567;EVM0010817;EVM0018344;EVM0021498;EVM0002980;EVM0002517;EVM0012628;EVM0010674;EVM0017015;EVM0014754;EVM0012199;EVM0003037;EVM0004717;EVM0018355;EVM0017589;EVM0008861;EVM0008448;EVM0023316;EVM0020276;EVM0018529;EVM0016092
GO:0005829	cytosol	0.62	cellular_component	EVM0006179;EVM0020588;EVM0016170;EVM0020785;EVM0003460;EVM0014649;EVM0014316;EVM0008305;EVM0013332;EVM0002950;EVM0021756;EVM0010884;EVM0018344;EVM0004852;EVM0021498;EVM0009637;EVM0002457;EVM0001459;EVM0002980;EVM0007794;EVM0010674;EVM0008471;EVM0014754;EVM0019998;EVM0012979;EVM0015976;EVM0012199;EVM0013784;EVM0000564;EVM0018355;EVM0005239;EVM0008248;EVM0012252;EVM0000411;EVM0002121;EVM0012360;EVM…
GO:0044764	multi-organism cellular process	0.62	biological_process	EVM0020785;EVM0000274;EVM0021498;EVM0014754;EVM0005843;EVM0018355;EVM0004060;EVM0020276;EVM0016092
GO:0031090	organelle membrane	0.622	cellular_component	EVM0001262;EVM0019763;EVM0012920;EVM0020785;EVM0010507;EVM0022547;EVM0023697;EVM0004356;EVM0020609;EVM0006989;EVM0008567;EVM0019432;EVM0010817;EVM0017865;EVM0019546;EVM0018344;EVM0021498;EVM0007932;EVM0012834;EVM0003283;EVM0002980;EVM0002517;EVM0012628;EVM0010674;EVM0017015;EVM0014186;EVM0011174;EVM0014754;EVM0012979;EVM0017098;EVM0012199;EVM0003037;EVM0000564;EVM0004717;EVM0007171;EVM0018355;EVM…
GO:0050878	regulation of body fluid levels	0.632	biological_process	EVM0019432;EVM0003283;EVM0015281
GO:0052546	cell wall pectin metabolic process	0.632	biological_process	EVM0002293;EVM0009470;EVM0022812
GO:0005793	endoplasmic reticulum-Golgi intermediate compartment	0.632	cellular_component	EVM0019432;EVM0003283;EVM0015281
GO:0031410	cytoplasmic vesicle	0.644	cellular_component	EVM0012920;EVM0012920;EVM0004356;EVM0019432;EVM0019432;EVM0007932;EVM0003283;EVM0003283;EVM0012628;EVM0010674;EVM0010674;EVM0007336;EVM0004717;EVM0012252;EVM0012252;EVM0003082;EVM0007729;EVM0007729;EVM0015281;EVM0015281;EVM0002293;EVM0022812
GO:0044267	cellular protein metabolic process	0.662	biological_process	EVM0020785;EVM0003460;EVM0020160;EVM0010341;EVM0003138;EVM0006954;EVM0019432;EVM0002170;EVM0021498;EVM0003283;EVM0010674;EVM0019923;EVM0014186;EVM0024542;EVM0021002;EVM0019998;EVM0000564;EVM0021572;EVM0009859;EVM0005590;EVM0000411;EVM0012360;EVM0006448;EVM0000252;EVM0015640;EVM0015247;EVM0005725;EVM0003656;EVM0003082;EVM0007729;EVM0015281;EVM0021781;EVM0006811;EVM0022812
GO:0043066	negative regulation of apoptotic process	0.666	biological_process	EVM0019432;EVM0003283;EVM0007729;EVM0015281
GO:0031982	vesicle	0.676	cellular_component	EVM0012920;EVM0012920;EVM0004356;EVM0019432;EVM0019432;EVM0007932;EVM0003283;EVM0003283;EVM0012628;EVM0010674;EVM0010674;EVM0007336;EVM0004717;EVM0012252;EVM0012252;EVM0003082;EVM0007729;EVM0007729;EVM0015281;EVM0015281;EVM0002293;EVM0022812
GO:0009517	PSII associated light-harvesting complex II	0.678	cellular_component	EVM0012145;EVM0013600
GO:0030155	regulation of cell adhesion	0.678	biological_process	EVM0019923;EVM0007729
GO:2000379	positive regulation of reactive oxygen species metabolic process	0.678	biological_process	EVM0017312;EVM0007729
GO:0005773	vacuole	0.768	cellular_component	EVM0001262;EVM0020785;EVM0010507;EVM0022547;EVM0020609;EVM0008567;EVM0010817;EVM0009327;EVM0018344;EVM0021498;EVM0010199;EVM0002980;EVM0002517;EVM0012628;EVM0010674;EVM0017015;EVM0008471;EVM0014754;EVM0020530;EVM0012199;EVM0003037;EVM0000564;EVM0004717;EVM0018355;EVM0022707;EVM0017589;EVM0008861;EVM0008448;EVM0016946;EVM0023316;EVM0020276;EVM0018529;EVM0015454;EVM0016092
GO:0019915	lipid storage	0.772	biological_process	EVM0003283;EVM0009581;EVM0015281
GO:0009773	photosynthetic electron transport in photosystem I	0.772	biological_process	EVM0010386;EVM0005722;EVM0014099
GO:0010029	regulation of seed germination	0.782	biological_process	EVM0014754;EVM0019998;EVM0018355;EVM0020276;EVM0016092
GO:0022603	regulation of anatomical structure morphogenesis	0.786	biological_process	EVM0008567;EVM0004768;EVM0017015;EVM0019923;EVM0000564;EVM0007729
GO:0071345	cellular response to cytokine stimulus	0.79	biological_process	EVM0019432;EVM0003283;EVM0007729;EVM0015281
GO:0019538	protein metabolic process	0.8	biological_process	EVM0020785;EVM0003460;EVM0020160;EVM0010341;EVM0003138;EVM0006954;EVM0019432;EVM0002170;EVM0021498;EVM0003283;EVM0010674;EVM0019923;EVM0014186;EVM0024542;EVM0021002;EVM0019998;EVM0000564;EVM0021572;EVM0009859;EVM0005590;EVM0000411;EVM0012360;EVM0006448;EVM0000252;EVM0015640;EVM0015247;EVM0005725;EVM0003656;EVM0003082;EVM0007729;EVM0015281;EVM0021781;EVM0006811;EVM0022812
GO:1900140	regulation of seedling development	0.802	biological_process	EVM0014754;EVM0019998;EVM0018355;EVM0020276;EVM0016092
GO:0005789	endoplasmic reticulum membrane	0.808	cellular_component	EVM0012920;EVM0004356;EVM0006989;EVM0019432;EVM0003283;EVM0014186;EVM0017098;EVM0000564;EVM0004717;EVM0007171;EVM0015065;EVM0023316;EVM0007950;EVM0015281
GO:0010109	regulation of photosynthesis	0.808	biological_process	EVM0023381;EVM0005843;EVM0010683;EVM0014099
GO:0034097	response to cytokine	0.808	biological_process	EVM0019432;EVM0003283;EVM0007729;EVM0015281
GO:0042175	nuclear outer membrane-endoplasmic reticulum membrane network	0.824	cellular_component	EVM0012920;EVM0004356;EVM0006989;EVM0019432;EVM0003283;EVM0014186;EVM0017098;EVM0000564;EVM0004717;EVM0007171;EVM0015065;EVM0023316;EVM0007950;EVM0015281
GO:0009767	photosynthetic electron transport chain	0.826	biological_process	EVM0010386;EVM0005722;EVM0014397;EVM0014099
GO:0065008	regulation of biological quality	0.836	biological_process	EVM0011755;EVM0010507;EVM0022547;EVM0010346;EVM0013332;EVM0019432;EVM0007916;EVM0010817;EVM0000274;EVM0003283;EVM0014186;EVM0005843;EVM0023121;EVM0008448;EVM0009581;EVM0005725;EVM0014099;EVM0007729;EVM0015281;EVM0000941
GO:0042548	regulation of photosynthesis, light reaction	0.84	biological_process	EVM0023381;EVM0010683;EVM0014099
GO:1903320	regulation of protein modification by small protein conjugation or removal	0.84	biological_process	EVM0019432;EVM0003283;EVM0015281
GO:0051298	centrosome duplication	0.84	biological_process	EVM0003283;EVM0011000;EVM0015281
GO:0031396	regulation of protein ubiquitination	0.84	biological_process	EVM0019432;EVM0003283;EVM0015281
GO:0042026	protein refolding	0.84	biological_process	EVM0010674;EVM0005725;EVM0007729
GO:0051087	chaperone binding	0.84	molecular_function	EVM0019432;EVM0003283;EVM0015281
GO:0022607	cellular component assembly	0.856	biological_process	EVM0003138;EVM0006954;EVM0023381;EVM0017865;EVM0021002;EVM0009859;EVM0006448;EVM0015640;EVM0005725;EVM0013354;EVM0007729;EVM0012077;EVM0006811
GO:0005524	ATP binding	0.86	molecular_function	EVM0020785;EVM0021498;EVM0003679;EVM0009637;EVM0010517;EVM0010674;EVM0007729
GO:0043167	ion binding	0.86	molecular_function	EVM0003561;EVM0020785;EVM0022547;EVM0015617;EVM0019432;EVM0021498;EVM0003679;EVM0003283;EVM0009637;EVM0010517;EVM0002980;EVM0004768;EVM0010674;EVM0012979;EVM0017312;EVM0005590;EVM0001654;EVM0007729;EVM0015281;EVM0003234;EVM0001889
GO:0052555	positive regulation by organism of immune response of other organism involved in symbiotic interaction	0.864	biological_process	EVM0010346;EVM0007916
GO:0052556	positive regulation by symbiont of host immune response	0.864	biological_process	EVM0010346;EVM0007916
GO:0052553	modulation by symbiont of host immune response	0.864	biological_process	EVM0010346;EVM0007916
GO:0052552	modulation by organism of immune response of other organism involved in symbiotic interaction	0.864	biological_process	EVM0010346;EVM0007916
GO:0052255	modulation by organism of defense response of other organism involved in symbiotic interaction	0.864	biological_process	EVM0010346;EVM0007916
GO:0052031	modulation by symbiont of host defense response	0.864	biological_process	EVM0010346;EVM0007916
GO:0051341	regulation of oxidoreductase activity	0.864	biological_process	EVM0017312;EVM0007729
GO:0030554	adenyl nucleotide binding	0.914	molecular_function	EVM0020785;EVM0021498;EVM0003679;EVM0009637;EVM0010517;EVM0010674;EVM0007729
GO:0032559	adenyl ribonucleotide binding	0.914	molecular_function	EVM0020785;EVM0021498;EVM0003679;EVM0009637;EVM0010517;EVM0010674;EVM0007729
GO:0036503	ERAD pathway	0.918	biological_process	EVM0019432;EVM0003283;EVM0015281
GO:0030433	ubiquitin-dependent ERAD pathway	0.918	biological_process	EVM0019432;EVM0003283;EVM0015281
GO:0043467	regulation of generation of precursor metabolites and energy	0.918	biological_process	EVM0023381;EVM0010683;EVM0014099
GO:0046688	response to copper ion	0.918	biological_process	EVM0013186;EVM0017982;EVM0023121
GO:0035639	purine ribonucleoside triphosphate binding	0.926	molecular_function	EVM0020785;EVM0015617;EVM0021498;EVM0003679;EVM0009637;EVM0010517;EVM0010674;EVM0007729;EVM0001889
GO:0045088	regulation of innate immune response	0.926	biological_process	EVM0010346;EVM0007916;EVM0014186;EVM0019998;EVM0007729
GO:0043067	regulation of programmed cell death	0.928	biological_process	EVM0019432;EVM0003283;EVM0007171;EVM0019370;EVM0007729;EVM0015281
GO:0033674	positive regulation of kinase activity	0.93	biological_process	EVM0019432;EVM0003283;EVM0007729;EVM0015281
GO:0045860	positive regulation of protein kinase activity	0.93	biological_process	EVM0019432;EVM0003283;EVM0007729;EVM0015281
GO:0001883	purine nucleoside binding	0.93	molecular_function	EVM0020785;EVM0015617;EVM0021498;EVM0003679;EVM0009637;EVM0010517;EVM0010674;EVM0007729;EVM0001889
GO:0032549	ribonucleoside binding	0.93	molecular_function	EVM0020785;EVM0015617;EVM0021498;EVM0003679;EVM0009637;EVM0010517;EVM0010674;EVM0007729;EVM0001889
GO:0032550	purine ribonucleoside binding	0.93	molecular_function	EVM0020785;EVM0015617;EVM0021498;EVM0003679;EVM0009637;EVM0010517;EVM0010674;EVM0007729;EVM0001889
GO:0017076	purine nucleotide binding	0.93	molecular_function	EVM0020785;EVM0015617;EVM0021498;EVM0003679;EVM0009637;EVM0010517;EVM0010674;EVM0007729;EVM0001889
GO:0001882	nucleoside binding	0.93	molecular_function	EVM0020785;EVM0015617;EVM0021498;EVM0003679;EVM0009637;EVM0010517;EVM0010674;EVM0007729;EVM0001889
GO:0032555	purine ribonucleotide binding	0.93	molecular_function	EVM0020785;EVM0015617;EVM0021498;EVM0003679;EVM0009637;EVM0010517;EVM0010674;EVM0007729;EVM0001889
GO:0003674	molecular_function	0.932	molecular_function	EVM0001086;EVM0004250;EVM0009694;EVM0003561;EVM0019763;EVM0020588;EVM0012920;EVM0020785;EVM0003460;EVM0002554;EVM0014649;EVM0004676;EVM0010507;EVM0022822;EVM0005326;EVM0000349;EVM0022547;EVM0020160;EVM0014316;EVM0010341;EVM0001167;EVM0015617;EVM0001953;EVM0007188;EVM0013332;EVM0004448;EVM0019432;EVM0023381;EVM0000577;EVM0020208;EVM0006465;EVM0007572;EVM0017881;EVM0010817;EVM0002170;EVM0000274;EVM…
GO:0005509	calcium ion binding	0.932	molecular_function	EVM0022547;EVM0019432;EVM0003283;EVM0015281;EVM0003234
GO:0032553	ribonucleotide binding	0.932	molecular_function	EVM0020785;EVM0015617;EVM0021498;EVM0003679;EVM0009637;EVM0010517;EVM0010674;EVM0007729;EVM0001889
GO:0072657	protein localization to membrane	0.932	biological_process	EVM0001953;EVM0010674;EVM0008012;EVM0007729
GO:0042981	regulation of apoptotic process	0.932	biological_process	EVM0019432;EVM0003283;EVM0007729;EVM0015281
GO:0090150	establishment of protein localization to membrane	0.932	biological_process	EVM0001953;EVM0010674;EVM0008012;EVM0007729
GO:0005783	endoplasmic reticulum	0.936	cellular_component	EVM0012920;EVM0012336;EVM0022547;EVM0010346;EVM0004356;EVM0006989;EVM0015617;EVM0001953;EVM0008567;EVM0019432;EVM0007916;EVM0024461;EVM0003283;EVM0017015;EVM0014186;EVM0017098;EVM0003037;EVM0000564;EVM0004717;EVM0007171;EVM0015065;EVM0023316;EVM0007950;EVM0015281
GO:0035821	modification of morphology or physiology of other organism	0.938	biological_process	EVM0010346;EVM0007916;EVM0005843
GO:0044003	modification by symbiont of host morphology or physiology	0.938	biological_process	EVM0010346;EVM0007916;EVM0005843
GO:0051817	modification of morphology or physiology of other organism involved in symbiotic interaction	0.938	biological_process	EVM0010346;EVM0007916;EVM0005843
GO:0051239	regulation of multicellular organismal process	0.944	biological_process	EVM0005326;EVM0008567;EVM0004448;EVM0019432;EVM0003283;EVM0004768;EVM0017015;EVM0019923;EVM0014754;EVM0019998;EVM0000564;EVM0018355;EVM0020276;EVM0007729;EVM0015281;EVM0016092
GO:0042327	positive regulation of phosphorylation	0.944	biological_process	EVM0019432;EVM0003283;EVM0007729;EVM0015281
GO:0001934	positive regulation of protein phosphorylation	0.944	biological_process	EVM0019432;EVM0003283;EVM0007729;EVM0015281
GO:0043168	anion binding	0.95	molecular_function	EVM0003561;EVM0020785;EVM0015617;EVM0021498;EVM0003679;EVM0009637;EVM0010517;EVM0002980;EVM0004768;EVM0010674;EVM0005590;EVM0007729;EVM0001889
GO:0061077	chaperone-mediated protein folding	0.95	biological_process	EVM0003460;EVM0010674;EVM0005725
GO:0046653	tetrahydrofolate metabolic process	0.954	biological_process	EVM0014649;EVM0005082
GO:0075136	response to host	0.954	biological_process	EVM0010346;EVM0007916
GO:0052572	response to host immune response	0.954	biological_process	EVM0010346;EVM0007916
GO:0052173	response to defenses of other organism involved in symbiotic interaction	0.954	biological_process	EVM0010346;EVM0007916
GO:0030431	sleep	0.954	biological_process	EVM0003283;EVM0015281
GO:0052564	response to immune response of other organism involved in symbiotic interaction	0.954	biological_process	EVM0010346;EVM0007916
GO:0052200	response to host defenses	0.954	biological_process	EVM0010346;EVM0007916
GO:0005811	lipid particle	0.978	cellular_component	EVM0003283;EVM0011000;EVM0007729;EVM0015281
GO:2000026	regulation of multicellular organismal development	0.978	biological_process	EVM0005326;EVM0008567;EVM0004448;EVM0019432;EVM0003283;EVM0004768;EVM0017015;EVM0019923;EVM0014754;EVM0019998;EVM0018355;EVM0020276;EVM0007729;EVM0015281;EVM0016092
GO:0050776	regulation of immune response	0.98	biological_process	EVM0010346;EVM0007916;EVM0014186;EVM0019998;EVM0007729
GO:0097367	carbohydrate derivative binding	0.982	molecular_function	EVM0020785;EVM0015617;EVM0021498;EVM0003679;EVM0009637;EVM0010517;EVM0010674;EVM0007729;EVM0001889
GO:0015031	protein transport	0.986	biological_process	EVM0001953;EVM0008567;EVM0003283;EVM0010674;EVM0017015;EVM0005725;EVM0008012;EVM0007729;EVM0015281
GO:0045184	establishment of protein localization	0.986	biological_process	EVM0001953;EVM0008567;EVM0003283;EVM0010674;EVM0017015;EVM0005725;EVM0008012;EVM0007729;EVM0015281
GO:0045937	positive regulation of phosphate metabolic process	0.986	biological_process	EVM0019432;EVM0003283;EVM0007729;EVM0015281
GO:0002684	positive regulation of immune system process	0.986	biological_process	EVM0010346;EVM0007916;EVM0014186;EVM0007729
GO:0010562	positive regulation of phosphorus metabolic process	0.986	biological_process	EVM0019432;EVM0003283;EVM0007729;EVM0015281
GO:0044093	positive regulation of molecular function	0.986	biological_process	EVM0019432;EVM0003283;EVM0010517;EVM0017312;EVM0007729;EVM0015281
GO:0009639	response to red or far red light	0.986	biological_process	EVM0012145;EVM0020609;EVM0012979;EVM0013604;EVM0013488;EVM0012252;EVM0017589;EVM0006185
GO:0003723	RNA binding	0.986	molecular_function	EVM0003460;EVM0020160;EVM0023381;EVM0016562;EVM0016615;EVM0013354;EVM0007729;EVM0021583;EVM0006811
GO:1901265	nucleoside phosphate binding	0.99	molecular_function	EVM0020785;EVM0015617;EVM0021498;EVM0003679;EVM0009637;EVM0010517;EVM0010674;EVM0005590;EVM0007729;EVM0001889
GO:0000166	nucleotide binding	0.99	molecular_function	EVM0020785;EVM0015617;EVM0021498;EVM0003679;EVM0009637;EVM0010517;EVM0010674;EVM0005590;EVM0007729;EVM0001889
GO:0006626	protein targeting to mitochondrion	0.99	biological_process	EVM0010674;EVM0005725;EVM0007729
GO:0072655	establishment of protein localization to mitochondrion	0.99	biological_process	EVM0010674;EVM0005725;EVM0007729
GO:0070585	protein localization to mitochondrion	0.99	biological_process	EVM0010674;EVM0005725;EVM0007729
GO:0010118	stomatal movement	0.99	biological_process	EVM0014754;EVM0018355;EVM0020276;EVM0016092
GO:0048581	negative regulation of post-embryonic development	0.99	biological_process	EVM0004448;EVM0014754;EVM0019998;EVM0018355;EVM0020276;EVM0016092
GO:0043085	positive regulation of catalytic activity	0.99	biological_process	EVM0019432;EVM0003283;EVM0010517;EVM0017312;EVM0007729;EVM0015281
GO:0002682	regulation of immune system process	0.99	biological_process	EVM0010346;EVM0007916;EVM0014186;EVM0019998;EVM0007729
GO:0006879	cellular iron ion homeostasis	0.99	biological_process	EVM0010507;EVM0008448
GO:0016021	integral component of membrane	0.99	cellular_component	EVM0004250;EVM0001953;EVM0019432;EVM0010817;EVM0007932;EVM0003283;EVM0016946;EVM0007950;EVM0015281;EVM0002293
GO:0048519	negative regulation of biological process	0.992	biological_process	EVM0009694;EVM0020160;EVM0004448;EVM0019432;EVM0023381;EVM0003283;EVM0004768;EVM0010674;EVM0014754;EVM0019998;EVM0019225;EVM0017877;EVM0007171;EVM0018355;EVM0013488;EVM0019370;EVM0010683;EVM0023121;EVM0020276;EVM0007729;EVM0015281;EVM0016092
GO:0009893	positive regulation of metabolic process	0.992	biological_process	EVM0013332;EVM0019432;EVM0003283;EVM0004440;EVM0017312;EVM0017877;EVM0016772;EVM0005725;EVM0005619;EVM0007729;EVM0015281;EVM0013783
GO:0009934	regulation of meristem structural organization	0.994	biological_process	EVM0008567;EVM0004768;EVM0017015
GO:0019220	regulation of phosphate metabolic process	0.996	biological_process	EVM0019432;EVM0023381;EVM0003283;EVM0009581;EVM0007729;EVM0015281
GO:0051174	regulation of phosphorus metabolic process	0.996	biological_process	EVM0019432;EVM0023381;EVM0003283;EVM0009581;EVM0007729;EVM0015281
GO:0048523	negative regulation of cellular process	0.996	biological_process	EVM0009694;EVM0020160;EVM0004448;EVM0019432;EVM0023381;EVM0003283;EVM0004768;EVM0010674;EVM0019225;EVM0017877;EVM0007171;EVM0013488;EVM0019370;EVM0010683;EVM0023121;EVM0007729;EVM0015281
GO:0022900	electron transport chain	0.996	biological_process	EVM0010386;EVM0005722;EVM0014397;EVM0014099
GO:0051347	positive regulation of transferase activity	0.996	biological_process	EVM0019432;EVM0003283;EVM0007729;EVM0015281
GO:1901700	response to oxygen-containing compound	0.996	biological_process	EVM0013186;EVM0009694;EVM0011755;EVM0003561;EVM0005950;EVM0020785;EVM0003460;EVM0007787;EVM0003138;EVM0007188;EVM0008567;EVM0006954;EVM0016562;EVM0021756;EVM0021498;EVM0010517;EVM0002980;EVM0017982;EVM0017015;EVM0003108;EVM0021002;EVM0019998;EVM0019225;EVM0000564;EVM0009859;EVM0007171;EVM0022707;EVM0017589;EVM0002121;EVM0006448;EVM0004060;EVM0015640;EVM0005619;EVM0001830;EVM0021781;EVM0000941;EVM…
GO:0007399	nervous system development	0.996	biological_process	EVM0019432;EVM0003283;EVM0007729;EVM0015281
GO:0044877	macromolecular complex binding	0.996	molecular_function	EVM0019432;EVM0003283;EVM0015281
GO:0045488	pectin metabolic process	0.996	biological_process	EVM0002293;EVM0009470;EVM0022812
GO:0010393	galacturonan metabolic process	0.996	biological_process	EVM0002293;EVM0009470;EVM0022812
GO:0051173	positive regulation of nitrogen compound metabolic process	0.996	biological_process	EVM0019432;EVM0003283;EVM0004440;EVM0017877;EVM0016772;EVM0005725;EVM0005619;EVM0007729;EVM0015281;EVM0013783
GO:0050832	defense response to fungus	0.996	biological_process	EVM0010346;EVM0000274;EVM0019923;EVM0014754;EVM0019998;EVM0018355;EVM0002121;EVM0020276;EVM0016092
GO:0010941	regulation of cell death	0.996	biological_process	EVM0019432;EVM0003283;EVM0007171;EVM0019370;EVM0007729;EVM0015281
GO:0043155	negative regulation of photosynthesis, light reaction	0.996	biological_process	EVM0023381;EVM0010683
GO:0010264	myo-inositol hexakisphosphate biosynthetic process	0.996	biological_process	EVM0000274;EVM0004852
GO:0010205	photoinhibition	0.996	biological_process	EVM0023381;EVM0010683
GO:0032958	inositol phosphate biosynthetic process	0.996	biological_process	EVM0000274;EVM0004852
GO:0033517	myo-inositol hexakisphosphate metabolic process	0.996	biological_process	EVM0000274;EVM0004852
GO:0005381	iron ion transmembrane transporter activity	0.996	molecular_function	EVM0010507;EVM0008448
GO:0034755	iron ion transmembrane transport	0.996	biological_process	EVM0010507;EVM0008448
GO:0016043	cellular component organization	0.998	biological_process	EVM0012920;EVM0003460;EVM0003138;EVM0006954;EVM0023381;EVM0010817;EVM0017865;EVM0016562;EVM0003283;EVM0010674;EVM0011000;EVM0019923;EVM0024542;EVM0021002;EVM0013600;EVM0009859;EVM0017877;EVM0005590;EVM0015441;EVM0012360;EVM0006448;EVM0015640;EVM0019952;EVM0005725;EVM0013354;EVM0007729;EVM0015281;EVM0013783;EVM0011972;EVM0002293;EVM0012077;EVM0009470;EVM0006811;EVM0001889;EVM0022812
GO:0098542	defense response to other organism	0.998	biological_process	EVM0010346;EVM0023381;EVM0000274;EVM0010517;EVM0019923;EVM0014186;EVM0014754;EVM0019998;EVM0018355;EVM0002121;EVM0000252;EVM0004060;EVM0005722;EVM0014397;EVM0020276;EVM0021583;EVM0016092
GO:0051345	positive regulation of hydrolase activity	0.998	biological_process	EVM0019432;EVM0003283;EVM0015281
GO:0080134	regulation of response to stress	1	biological_process	EVM0010346;EVM0007916;EVM0014186;EVM0019998;EVM0017312;EVM0005590;EVM0007729;EVM0013783
GO:0098771	inorganic ion homeostasis	1	biological_process	EVM0010507;EVM0022547;EVM0000274;EVM0014186;EVM0023121;EVM0008448
GO:0044085	cellular component biogenesis	1	biological_process	EVM0003138;EVM0006954;EVM0023381;EVM0010817;EVM0017865;EVM0021002;EVM0012979;EVM0009859;EVM0006448;EVM0015640;EVM0005725;EVM0013354;EVM0007729;EVM0012077;EVM0006811;EVM0022812
GO:0010608	posttranscriptional regulation of gene expression	1	biological_process	EVM0020160;EVM0004448;EVM0003283;EVM0002943;EVM0023121;EVM0014099;EVM0015281
GO:0031224	intrinsic component of membrane	1	cellular_component	EVM0004250;EVM0015770;EVM0007153;EVM0001953;EVM0019432;EVM0010817;EVM0007346;EVM0007932;EVM0003283;EVM0016946;EVM0007950;EVM0015281;EVM0002293;EVM0013026
GO:0042886	amide transport	1	biological_process	EVM0001953;EVM0008567;EVM0020208;EVM0003283;EVM0010674;EVM0017015;EVM0005725;EVM0008012;EVM0007729;EVM0015281
GO:0009607	response to biotic stimulus	1	biological_process	EVM0020785;EVM0010346;EVM0019432;EVM0023381;EVM0017881;EVM0007916;EVM0000274;EVM0021498;EVM0003283;EVM0010517;EVM0019923;EVM0014186;EVM0014754;EVM0019998;EVM0007171;EVM0018355;EVM0002121;EVM0000252;EVM0004060;EVM0005722;EVM0014397;EVM0020276;EVM0015281;EVM0021583;EVM0016092
GO:0031325	positive regulation of cellular metabolic process	1	biological_process	EVM0019432;EVM0003283;EVM0004440;EVM0017312;EVM0017877;EVM0016772;EVM0005725;EVM0005619;EVM0007729;EVM0015281;EVM0013783
GO:0010319	stromule	1	cellular_component	EVM0001459;EVM0010517;EVM0002121;EVM0005722
GO:0051641	cellular localization	1	biological_process	EVM0003460;EVM0010507;EVM0001953;EVM0008567;EVM0019432;EVM0003283;EVM0010674;EVM0017015;EVM0008448;EVM0005725;EVM0008012;EVM0007729;EVM0015281
GO:0009069	serine family amino acid metabolic process	1	biological_process	EVM0018344;EVM0003679;EVM0012199
GO:0098805	whole membrane	1	cellular_component	EVM0001262;EVM0020785;EVM0010507;EVM0022547;EVM0020609;EVM0008567;EVM0010817;EVM0018344;EVM0021498;EVM0002980;EVM0002517;EVM0012628;EVM0010674;EVM0017015;EVM0014754;EVM0012199;EVM0003037;EVM0000564;EVM0004717;EVM0018355;EVM0017589;EVM0008861;EVM0008448;EVM0023316;EVM0020276;EVM0018529;EVM0016092
GO:0051651	maintenance of location in cell	1	biological_process	EVM0010507;EVM0008448
GO:0045935	positive regulation of nucleobase-containing compound metabolic process	1	biological_process	EVM0019432;EVM0003283;EVM0004440;EVM0017877;EVM0016772;EVM0005725;EVM0005619;EVM0015281;EVM0013783
GO:0051701	interaction with host	1	biological_process	EVM0010346;EVM0007916;EVM0005843
GO:0031401	positive regulation of protein modification process	1	biological_process	EVM0019432;EVM0003283;EVM0007729;EVM0015281
GO:0044238	primary metabolic process	1	biological_process	EVM0020588;EVM0020785;EVM0003460;EVM0002554;EVM0014649;EVM0020160;EVM0014316;EVM0010341;EVM0003138;EVM0006954;EVM0019432;EVM0010817;EVM0002170;EVM0016562;EVM0018344;EVM0004852;EVM0024461;EVM0021498;EVM0003679;EVM0003283;EVM0002517;EVM0016615;EVM0010674;EVM0019923;EVM0014186;EVM0024542;EVM0021002;EVM0019998;EVM0016432;EVM0013605;EVM0010324;EVM0012199;EVM0000564;EVM0021572;EVM0009859;EVM0013827;EVM…
GO:0036094	small molecule binding	1	molecular_function	EVM0003561;EVM0020785;EVM0015617;EVM0021498;EVM0003679;EVM0009637;EVM0010517;EVM0002980;EVM0010674;EVM0005590;EVM0007729;EVM0001889
GO:0008104	protein localization	1	biological_process	EVM0001953;EVM0008567;EVM0003283;EVM0010674;EVM0017015;EVM0005725;EVM0008012;EVM0007729;EVM0015281
GO:0050793	regulation of developmental process	1	biological_process	EVM0005326;EVM0008567;EVM0004448;EVM0019432;EVM0003283;EVM0004768;EVM0017015;EVM0019923;EVM0014754;EVM0019998;EVM0000564;EVM0018355;EVM0020276;EVM0007729;EVM0015281;EVM0016092
GO:0006535	cysteine biosynthetic process from serine	1	biological_process	EVM0018344;EVM0012199
GO:0004124	cysteine synthase activity	1	molecular_function	EVM0018344;EVM0012199
GO:0043647	inositol phosphate metabolic process	1	biological_process	EVM0000274;EVM0004852
GO:0006826	iron ion transport	1	biological_process	EVM0010507;EVM0008448
GO:0055065	metal ion homeostasis	1	biological_process	EVM0010507;EVM0022547;EVM0014186;EVM0023121;EVM0008448
GO:0006839	mitochondrial transport	1	biological_process	EVM0010674;EVM0005725;EVM0007729
GO:0015833	peptide transport	1	biological_process	EVM0001953;EVM0008567;EVM0003283;EVM0010674;EVM0017015;EVM0005725;EVM0008012;EVM0007729;EVM0015281
GO:0019637	organophosphate metabolic process	1	biological_process	EVM0014316;EVM0019432;EVM0000274;EVM0004852;EVM0003283;EVM0010674;EVM0016432;EVM0005239;EVM0008248;EVM0015441;EVM0009581;EVM0006653;EVM0005725;EVM0014099;EVM0007729;EVM0015281;EVM0001889
GO:0032268	regulation of cellular protein metabolic process	1	biological_process	EVM0020160;EVM0004448;EVM0019432;EVM0023381;EVM0003283;EVM0023121;EVM0007729;EVM0015281
GO:0044710	single-organism metabolic process	1	biological_process	EVM0020588;EVM0002554;EVM0014649;EVM0014316;EVM0013332;EVM0019432;EVM0023381;EVM0010817;EVM0000274;EVM0019546;EVM0018344;EVM0004852;EVM0024461;EVM0003679;EVM0024661;EVM0003283;EVM0002980;EVM0007794;EVM0002517;EVM0010674;EVM0014186;EVM0005843;EVM0016432;EVM0013605;EVM0012199;EVM0013784;EVM0013827;EVM0017877;EVM0007171;EVM0005590;EVM0005239;EVM0008248;EVM0015441;EVM0010683;EVM0009718;EVM0010386;EVM…
GO:0007005	mitochondrion organization	1	biological_process	EVM0010674;EVM0019952;EVM0005725;EVM0007729
GO:0031301	integral component of organelle membrane	1	cellular_component	EVM0019432;EVM0003283;EVM0007950;EVM0015281
GO:0006612	protein targeting to membrane	1	biological_process	EVM0001953;EVM0010674;EVM0008012
GO:0098588	bounding membrane of organelle	1	cellular_component	EVM0001262;EVM0020785;EVM0010507;EVM0022547;EVM0004356;EVM0020609;EVM0008567;EVM0010817;EVM0018344;EVM0021498;EVM0007932;EVM0002980;EVM0002517;EVM0012628;EVM0010674;EVM0017015;EVM0014754;EVM0012199;EVM0003037;EVM0000564;EVM0004717;EVM0018355;EVM0017589;EVM0008861;EVM0008448;EVM0023316;EVM0007950;EVM0020276;EVM0003082;EVM0018529;EVM0002293;EVM0016092
GO:0051241	negative regulation of multicellular organismal process	1	biological_process	EVM0004448;EVM0014754;EVM0019998;EVM0018355;EVM0020276;EVM0016092
GO:0071840	cellular component organization or biogenesis	1	biological_process	EVM0012920;EVM0003460;EVM0003138;EVM0006954;EVM0023381;EVM0010817;EVM0017865;EVM0016562;EVM0003283;EVM0010674;EVM0011000;EVM0019923;EVM0024542;EVM0021002;EVM0012979;EVM0013600;EVM0009859;EVM0017877;EVM0005590;EVM0015441;EVM0012360;EVM0006448;EVM0015640;EVM0019952;EVM0005725;EVM0013354;EVM0003082;EVM0007729;EVM0015281;EVM0013783;EVM0011972;EVM0002293;EVM0012077;EVM0009470;EVM0006811;EVM0001889;EVM…
GO:0097708	intracellular vesicle	1	cellular_component	EVM0012920;EVM0004356;EVM0019432;EVM0007932;EVM0003283;EVM0012628;EVM0010674;EVM0007336;EVM0004717;EVM0012252;EVM0003082;EVM0007729;EVM0015281;EVM0002293;EVM0022812
GO:0016790	thiolester hydrolase activity	1	molecular_function	EVM0013827;EVM0001654
GO:0098661	inorganic anion transmembrane transport	1	biological_process	EVM0020208;EVM0011174
GO:1905156	negative regulation of photosynthesis	1	biological_process	EVM0023381;EVM0010683
GO:0009664	plant-type cell wall organization	1	biological_process	EVM0019923;EVM0002293;EVM0009470;EVM0022812
GO:0031324	negative regulation of cellular metabolic process	1	biological_process	EVM0009694;EVM0020160;EVM0004448;EVM0023381;EVM0010674;EVM0019225;EVM0017877;EVM0013488;EVM0010683;EVM0023121;EVM0007729
GO:0005515	protein binding	1	molecular_function	EVM0003561;EVM0003460;EVM0022547;EVM0019432;EVM0000577;EVM0006465;EVM0010817;EVM0003283;EVM0010674;EVM0016946;EVM0005725;EVM0007729;EVM0015281;EVM0021781;EVM0001889
GO:0071944	cell periphery	1	cellular_component	EVM0004250;EVM0015770;EVM0022647;EVM0012920;EVM0005950;EVM0020785;EVM0012336;EVM0015617;EVM0001953;EVM0007188;EVM0008567;EVM0014285;EVM0020208;EVM0017881;EVM0007916;EVM0010817;EVM0007346;EVM0009327;EVM0018344;EVM0024461;EVM0021498;EVM0007065;EVM0009637;EVM0001459;EVM0010517;EVM0002980;EVM0002517;EVM0012628;EVM0004768;EVM0010674;EVM0000034;EVM0009258;EVM0017015;EVM0008471;EVM0024542;EVM0014754;EVM…
GO:0031300	intrinsic component of organelle membrane	1	cellular_component	EVM0019432;EVM0003283;EVM0007950;EVM0015281
GO:0051093	negative regulation of developmental process	1	biological_process	EVM0004448;EVM0004768;EVM0014754;EVM0019998;EVM0018355;EVM0020276;EVM0016092
GO:0044281	small molecule metabolic process	1	biological_process	EVM0020588;EVM0002554;EVM0014649;EVM0014316;EVM0019432;EVM0010817;EVM0000274;EVM0018344;EVM0004852;EVM0003679;EVM0003283;EVM0007794;EVM0010674;EVM0016432;EVM0012199;EVM0013827;EVM0007171;EVM0005239;EVM0008248;EVM0015441;EVM0010683;EVM0009581;EVM0006653;EVM0005082;EVM0005725;EVM0014099;EVM0007729;EVM0015281;EVM0000941;EVM0001889
GO:0051649	establishment of localization in cell	1	biological_process	EVM0003460;EVM0001953;EVM0008567;EVM0019432;EVM0003283;EVM0010674;EVM0017015;EVM0005725;EVM0008012;EVM0007729;EVM0015281
GO:0034605	cellular response to heat	1	biological_process	EVM0003460;EVM0010674;EVM0005619
GO:0045859	regulation of protein kinase activity	1	biological_process	EVM0019432;EVM0003283;EVM0007729;EVM0015281
GO:0043549	regulation of kinase activity	1	biological_process	EVM0019432;EVM0003283;EVM0007729;EVM0015281
GO:0043170	macromolecule metabolic process	1	biological_process	EVM0020785;EVM0003460;EVM0020160;EVM0010341;EVM0003138;EVM0006954;EVM0019432;EVM0002170;EVM0016562;EVM0021498;EVM0003283;EVM0016615;EVM0010674;EVM0019923;EVM0014186;EVM0024542;EVM0021002;EVM0019998;EVM0010324;EVM0000564;EVM0021572;EVM0009859;EVM0017877;EVM0005590;EVM0015441;EVM0000411;EVM0012360;EVM0006448;EVM0000252;EVM0015640;EVM0015247;EVM0005725;EVM0014419;EVM0013354;EVM0005615;EVM0003656;EVM…
GO:0033036	macromolecule localization	1	biological_process	EVM0003460;EVM0001953;EVM0008567;EVM0003283;EVM0010674;EVM0017015;EVM0009581;EVM0005725;EVM0008012;EVM0007729;EVM0015281
GO:0047350	glucuronate-1-phosphate uridylyltransferase activity	1	molecular_function	EVM0005239
GO:0048730	epidermis morphogenesis	1	biological_process	EVM0011972
GO:0052746	inositol phosphorylation	1	biological_process	EVM0004852
GO:0090409	malonyl-CoA synthetase activity	1	molecular_function	EVM0007794
GO:0003959	NADPH dehydrogenase activity	1	molecular_function	EVM0024661
GO:0047184	1-acylglycerophosphocholine O-acyltransferase activity	1	molecular_function	EVM0024461
GO:0043812	phosphatidylinositol-4-phosphate phosphatase activity	1	molecular_function	EVM0012920
GO:0009512	cytochrome b6f complex	1	cellular_component	EVM0014397
GO:0052573	UDP-D-galactose metabolic process	1	biological_process	EVM0005239
GO:0034596	phosphatidylinositol phosphate 4-phosphatase activity	1	molecular_function	EVM0012920
GO:0052725	inositol-1,3,4-trisphosphate 6-kinase activity	1	molecular_function	EVM0004852
GO:0051765	inositol tetrakisphosphate kinase activity	1	molecular_function	EVM0000274
GO:1901033	positive regulation of response to reactive oxygen species	1	biological_process	EVM0017312
GO:0043589	skin morphogenesis	1	biological_process	EVM0011972
GO:0031520	plasma membrane of cell tip	1	cellular_component	EVM0012920
GO:0005844	polysome	1	cellular_component	EVM0010674
GO:0000974	Prp19 complex	1	cellular_component	EVM0010674
GO:0010242	oxygen evolving activity	1	molecular_function	EVM0023381
GO:0009783	photosystem II antenna complex	1	cellular_component	EVM0012145
GO:0009780	photosynthetic NADP+ reduction	1	biological_process	EVM0014099
GO:1901668	regulation of superoxide dismutase activity	1	biological_process	EVM0017312
GO:0004168	dolichol kinase activity	1	molecular_function	EVM0000360
GO:0008113	peptide-methionine (S)-S-oxide reductase activity	1	molecular_function	EVM0023007
GO:0000492	box C/D snoRNP assembly	1	biological_process	EVM0005725
GO:0004615	phosphomannomutase activity	1	molecular_function	EVM0020588
GO:0042083	5,10-methylenetetrahydrofolate-dependent methyltransferase activity	1	molecular_function	EVM0014649
GO:0006376	mRNA splice site selection	1	biological_process	EVM0013354
GO:1900371	regulation of purine nucleotide biosynthetic process	1	biological_process	EVM0009581
GO:0090410	malonate catabolic process	1	biological_process	EVM0007794
GO:0048529	magnesium-protoporphyrin IX monomethyl ester (oxidative) cyclase activity	1	molecular_function	EVM0019546
GO:0030808	regulation of nucleotide biosynthetic process	1	biological_process	EVM0009581
GO:1900409	positive regulation of cellular response to oxidative stress	1	biological_process	EVM0017312
GO:0051738	xanthophyll binding	1	molecular_function	EVM0013600
GO:0035299	inositol pentakisphosphate 2-kinase activity	1	molecular_function	EVM0000274
GO:0004416	hydroxyacylglutathione hydrolase activity	1	molecular_function	EVM0001654
GO:0046028	electron transporter, transferring electrons from cytochrome b6/f complex of photosystem II activity	1	molecular_function	EVM0014397
GO:0004595	pantetheine-phosphate adenylyltransferase activity	1	molecular_function	EVM0009581
GO:1902884	positive regulation of response to oxidative stress	1	biological_process	EVM0017312
GO:0017103	UTP:galactose-1-phosphate uridylyltransferase activity	1	molecular_function	EVM0005239
GO:0009277	fungal-type cell wall	1	cellular_component	EVM0010674
GO:0004146	dihydrofolate reductase activity	1	molecular_function	EVM0014649
GO:0009256	10-formyltetrahydrofolate metabolic process	1	biological_process	EVM0014649
GO:0009257	10-formyltetrahydrofolate biosynthetic process	1	biological_process	EVM0014649
GO:0042973	glucan endo-1,3-beta-D-glucosidase activity	1	molecular_function	EVM0000349
GO:0030272	5-formyltetrahydrofolate cyclo-ligase activity	1	molecular_function	EVM0005082
GO:0052636	arabinosyltransferase activity	1	molecular_function	EVM0022812
GO:0004799	thymidylate synthase activity	1	molecular_function	EVM0014649
GO:0035061	interchromatin granule	1	cellular_component	EVM0013354
GO:1904833	positive regulation of removal of superoxide radicals	1	biological_process	EVM0017312
GO:1901671	positive regulation of superoxide dismutase activity	1	biological_process	EVM0017312
GO:0047338	UTP:xylose-1-phosphate uridylyltransferase activity	1	molecular_function	EVM0005239
GO:0032942	inositol tetrakisphosphate 2-kinase activity	1	molecular_function	EVM0000274
GO:0052726	inositol-1,3,4-trisphosphate 5-kinase activity	1	molecular_function	EVM0004852
GO:0080020	regulation of coenzyme A biosynthetic process	1	biological_process	EVM0009581
GO:0009673	low-affinity phosphate transmembrane transporter activity	1	molecular_function	EVM0011174
GO:0010491	UTP:arabinose-1-phosphate uridylyltransferase activity	1	molecular_function	EVM0005239
GO:0050518	2-C-methyl-D-erythritol 4-phosphate cytidylyltransferase activity	1	molecular_function	EVM0006653
GO:0008831	dTDP-4-dehydrorhamnose reductase activity	1	molecular_function	EVM0008248
GO:0008830	dTDP-4-dehydrorhamnose 3,5-epimerase activity	1	molecular_function	EVM0008248
GO:0051246	regulation of protein metabolic process	1	biological_process	EVM0020160;EVM0004448;EVM0019432;EVM0023381;EVM0003283;EVM0023121;EVM0007729;EVM0015281
GO:0019344	cysteine biosynthetic process	1	biological_process	EVM0018344;EVM0012199
GO:0008187	poly-pyrimidine tract binding	1	molecular_function	EVM0023381;EVM0021583
GO:0046173	polyol biosynthetic process	1	biological_process	EVM0000274;EVM0004852
GO:0008266	poly(U) RNA binding	1	molecular_function	EVM0023381;EVM0021583
GO:0045089	positive regulation of innate immune response	1	biological_process	EVM0010346;EVM0007916;EVM0014186
GO:0006413	translational initiation	1	biological_process	EVM0020160;EVM0015247;EVM0006811
GO:0050801	ion homeostasis	1	biological_process	EVM0010507;EVM0022547;EVM0000274;EVM0014186;EVM0023121;EVM0008448
GO:0034622	cellular macromolecular complex assembly	1	biological_process	EVM0023381;EVM0005725;EVM0013354;EVM0007729;EVM0012077;EVM0006811
GO:0071704	organic substance metabolic process	1	biological_process	EVM0020588;EVM0020785;EVM0003460;EVM0002554;EVM0014649;EVM0020160;EVM0014316;EVM0010341;EVM0003138;EVM0013332;EVM0006954;EVM0019432;EVM0010817;EVM0002170;EVM0000274;EVM0016562;EVM0018344;EVM0004852;EVM0024461;EVM0021498;EVM0003679;EVM0003283;EVM0007794;EVM0002517;EVM0016615;EVM0010674;EVM0019923;EVM0014186;EVM0024542;EVM0021002;EVM0019998;EVM0016432;EVM0013605;EVM0010324;EVM0012199;EVM0013784;EVM…
GO:0043623	cellular protein complex assembly	1	biological_process	EVM0023381;EVM0005725;EVM0007729;EVM0012077;EVM0006811
GO:0051336	regulation of hydrolase activity	1	biological_process	EVM0019432;EVM0003283;EVM0015281
GO:0046915	transition metal ion transmembrane transporter activity	1	molecular_function	EVM0010507;EVM0008448;EVM0016946
GO:0006732	coenzyme metabolic process	1	biological_process	EVM0014649;EVM0014316;EVM0009581;EVM0005082;EVM0002091;EVM0014099
GO:0000226	microtubule cytoskeleton organization	1	biological_process	EVM0003283;EVM0011000;EVM0024542;EVM0007729;EVM0015281
GO:0006952	defense response	1	biological_process	EVM0010346;EVM0023381;EVM0000274;EVM0010517;EVM0019923;EVM0014186;EVM0014754;EVM0019998;EVM0018355;EVM0002121;EVM0000252;EVM0004060;EVM0005722;EVM0014397;EVM0020276;EVM0007729;EVM0021583;EVM0016092
GO:0010206	photosystem II repair	1	biological_process	EVM0010341;EVM0002170
GO:0030091	protein repair	1	biological_process	EVM0010341;EVM0002170
GO:0005618	cell wall	1	cellular_component	EVM0005950;EVM0020785;EVM0014285;EVM0021498;EVM0009637;EVM0001459;EVM0010517;EVM0012628;EVM0010674;EVM0009258;EVM0014754;EVM0012979;EVM0001811;EVM0002943;EVM0018355;EVM0014560;EVM0020276;EVM0003088;EVM0006456;EVM0016092
GO:0019752	carboxylic acid metabolic process	1	biological_process	EVM0020588;EVM0002554;EVM0014649;EVM0014316;EVM0018344;EVM0003679;EVM0007794;EVM0016432;EVM0012199;EVM0013827;EVM0007171;EVM0005239;EVM0010683;EVM0006653;EVM0005082;EVM0000941
GO:0030312	external encapsulating structure	1	cellular_component	EVM0005950;EVM0020785;EVM0014285;EVM0021498;EVM0009637;EVM0001459;EVM0010517;EVM0012628;EVM0010674;EVM0009258;EVM0014754;EVM0012979;EVM0001811;EVM0002943;EVM0018355;EVM0014560;EVM0020276;EVM0003088;EVM0006456;EVM0016092
GO:0010876	lipid localization	1	biological_process	EVM0003283;EVM0009581;EVM0015281
GO:0031349	positive regulation of defense response	1	biological_process	EVM0010346;EVM0007916;EVM0014186
GO:0001932	regulation of protein phosphorylation	1	biological_process	EVM0019432;EVM0003283;EVM0007729;EVM0015281
GO:2000113	negative regulation of cellular macromolecule biosynthetic process	1	biological_process	EVM0009694;EVM0020160;EVM0004448;EVM0010674;EVM0019225;EVM0017877;EVM0013488;EVM0023121
GO:0010558	negative regulation of macromolecule biosynthetic process	1	biological_process	EVM0009694;EVM0020160;EVM0004448;EVM0010674;EVM0019225;EVM0017877;EVM0013488;EVM0023121
GO:0007017	microtubule-based process	1	biological_process	EVM0003283;EVM0011000;EVM0024542;EVM0007729;EVM0015281
GO:0043161	proteasome-mediated ubiquitin-dependent protein catabolic process	1	biological_process	EVM0019432;EVM0003283;EVM0015281
GO:0050778	positive regulation of immune response	1	biological_process	EVM0010346;EVM0007916;EVM0014186
GO:0046685	response to arsenic-containing substance	1	biological_process	EVM0013186;EVM0017982;EVM0013927
GO:0010604	positive regulation of macromolecule metabolic process	1	biological_process	EVM0019432;EVM0003283;EVM0004440;EVM0017877;EVM0016772;EVM0005725;EVM0005619;EVM0007729;EVM0015281;EVM0013783
GO:0009892	negative regulation of metabolic process	1	biological_process	EVM0009694;EVM0020160;EVM0004448;EVM0023381;EVM0003283;EVM0010674;EVM0019225;EVM0017877;EVM0013488;EVM0010683;EVM0023121;EVM0007729;EVM0015281
GO:0006534	cysteine metabolic process	1	biological_process	EVM0018344;EVM0012199
GO:0006760	folic acid-containing compound metabolic process	1	biological_process	EVM0014649;EVM0005082
GO:0042558	pteridine-containing compound metabolic process	1	biological_process	EVM0014649;EVM0005082
GO:0045471	response to ethanol	1	biological_process	EVM0013186;EVM0017982
GO:0006793	phosphorus metabolic process	1	biological_process	EVM0012920;EVM0014316;EVM0019432;EVM0000274;EVM0004852;EVM0003283;EVM0002457;EVM0004768;EVM0010674;EVM0019923;EVM0024542;EVM0016432;EVM0013605;EVM0000564;EVM0000360;EVM0005239;EVM0019370;EVM0008248;EVM0015441;EVM0009581;EVM0006653;EVM0022426;EVM0002091;EVM0005725;EVM0014099;EVM0007729;EVM0015281;EVM0001889
GO:0003676	nucleic acid binding	1	molecular_function	EVM0003460;EVM0022822;EVM0020160;EVM0004448;EVM0023381;EVM0019546;EVM0016562;EVM0004440;EVM0016615;EVM0011000;EVM0019225;EVM0013488;EVM0022630;EVM0013354;EVM0007729;EVM0021583;EVM0006811
GO:0051240	positive regulation of multicellular organismal process	1	biological_process	EVM0019432;EVM0003283;EVM0007729;EVM0015281
GO:0098796	membrane protein complex	1	cellular_component	EVM0012145;EVM0023381;EVM0017865;EVM0013600;EVM0014099;EVM0012077;EVM0018982;EVM0006185
GO:0005794	Golgi apparatus	1	cellular_component	EVM0005950;EVM0020785;EVM0004356;EVM0015617;EVM0021498;EVM0007932;EVM0002517;EVM0012628;EVM0000034;EVM0007336;EVM0014754;EVM0003037;EVM0004717;EVM0018355;EVM0012252;EVM0007950;EVM0020276;EVM0003082;EVM0003088;EVM0002293;EVM0004731;EVM0016092;EVM0022812
GO:0031399	regulation of protein modification process	1	biological_process	EVM0019432;EVM0023381;EVM0003283;EVM0007729;EVM0015281
GO:0055080	cation homeostasis	1	biological_process	EVM0010507;EVM0022547;EVM0014186;EVM0023121;EVM0008448
GO:0071806	protein transmembrane transport	1	biological_process	EVM0010674;EVM0008012;EVM0007729
GO:0065002	intracellular protein transmembrane transport	1	biological_process	EVM0010674;EVM0008012;EVM0007729
GO:0055076	transition metal ion homeostasis	1	biological_process	EVM0010507;EVM0023121;EVM0008448
GO:0034249	negative regulation of cellular amide metabolic process	1	biological_process	EVM0020160;EVM0004448;EVM0023121
GO:0017148	negative regulation of translation	1	biological_process	EVM0020160;EVM0004448;EVM0023121
GO:0010498	proteasomal protein catabolic process	1	biological_process	EVM0019432;EVM0003283;EVM0015281
GO:0071826	ribonucleoprotein complex subunit organization	1	biological_process	EVM0005725;EVM0013354
GO:0010207	photosystem II assembly	1	biological_process	EVM0023381;EVM0006811
GO:0010171	body morphogenesis	1	biological_process	EVM0003283;EVM0015281
GO:0022618	ribonucleoprotein complex assembly	1	biological_process	EVM0005725;EVM0013354
GO:0006563	L-serine metabolic process	1	biological_process	EVM0018344;EVM0012199
GO:0009117	nucleotide metabolic process	1	biological_process	EVM0014316;EVM0019432;EVM0003283;EVM0010674;EVM0005239;EVM0008248;EVM0015441;EVM0009581;EVM0005725;EVM0014099;EVM0007729;EVM0015281;EVM0001889
GO:0065009	regulation of molecular function	1	biological_process	EVM0020160;EVM0019432;EVM0003283;EVM0010517;EVM0017312;EVM0000564;EVM0007729;EVM0015281
GO:0071705	nitrogen compound transport	1	biological_process	EVM0004250;EVM0003460;EVM0001953;EVM0008567;EVM0020208;EVM0003283;EVM0010674;EVM0017015;EVM0007950;EVM0005725;EVM0008012;EVM0007729;EVM0015281
GO:0031347	regulation of defense response	1	biological_process	EVM0010346;EVM0007916;EVM0014186;EVM0019998;EVM0007729;EVM0013783
GO:0051172	negative regulation of nitrogen compound metabolic process	1	biological_process	EVM0009694;EVM0020160;EVM0004448;EVM0010674;EVM0019225;EVM0017877;EVM0013488;EVM0023121
GO:0010629	negative regulation of gene expression	1	biological_process	EVM0009694;EVM0020160;EVM0004448;EVM0003283;EVM0010674;EVM0019225;EVM0017877;EVM0013488;EVM0023121;EVM0015281
GO:0006753	nucleoside phosphate metabolic process	1	biological_process	EVM0014316;EVM0019432;EVM0003283;EVM0010674;EVM0005239;EVM0008248;EVM0015441;EVM0009581;EVM0005725;EVM0014099;EVM0007729;EVM0015281;EVM0001889
GO:0071702	organic substance transport	1	biological_process	EVM0004250;EVM0019763;EVM0003460;EVM0001953;EVM0008567;EVM0020208;EVM0003283;EVM0010674;EVM0017015;EVM0016946;EVM0007950;EVM0005725;EVM0008012;EVM0007729;EVM0015281
GO:0006915	apoptotic process	1	biological_process	EVM0003283;EVM0007729;EVM0015281
GO:0051094	positive regulation of developmental process	1	biological_process	EVM0019432;EVM0003283;EVM0007729;EVM0015281
GO:0051338	regulation of transferase activity	1	biological_process	EVM0019432;EVM0003283;EVM0007729;EVM0015281
GO:0032270	positive regulation of cellular protein metabolic process	1	biological_process	EVM0019432;EVM0003283;EVM0007729;EVM0015281
GO:0009605	response to external stimulus	1	biological_process	EVM0020785;EVM0003460;EVM0010346;EVM0019432;EVM0023381;EVM0020208;EVM0017881;EVM0007916;EVM0000274;EVM0021498;EVM0003283;EVM0010517;EVM0002980;EVM0019923;EVM0014186;EVM0014754;EVM0019998;EVM0018355;EVM0002121;EVM0000252;EVM0004060;EVM0005722;EVM0014397;EVM0020276;EVM0007729;EVM0015281;EVM0000941;EVM0021583;EVM0016092
GO:0044260	cellular macromolecule metabolic process	1	biological_process	EVM0020785;EVM0003460;EVM0020160;EVM0010341;EVM0003138;EVM0006954;EVM0019432;EVM0002170;EVM0016562;EVM0021498;EVM0003283;EVM0016615;EVM0010674;EVM0019923;EVM0014186;EVM0024542;EVM0021002;EVM0019998;EVM0010324;EVM0000564;EVM0021572;EVM0009859;EVM0017877;EVM0005590;EVM0015441;EVM0000411;EVM0012360;EVM0006448;EVM0000252;EVM0015640;EVM0015247;EVM0005725;EVM0014419;EVM0013354;EVM0005615;EVM0003656;EVM…
GO:0043581	obsolete mycelium development	1	biological_process	EVM0010674;EVM0005725
GO:0009070	serine family amino acid biosynthetic process	1	biological_process	EVM0018344;EVM0012199
GO:0055072	iron ion homeostasis	1	biological_process	EVM0010507;EVM0008448
GO:0051247	positive regulation of protein metabolic process	1	biological_process	EVM0019432;EVM0003283;EVM0007729;EVM0015281
GO:0007010	cytoskeleton organization	1	biological_process	EVM0003460;EVM0003283;EVM0011000;EVM0024542;EVM0007729;EVM0015281
GO:0003727	single-stranded RNA binding	1	molecular_function	EVM0023381;EVM0016615;EVM0021583
GO:0006796	phosphate-containing compound metabolic process	1	biological_process	EVM0012920;EVM0014316;EVM0019432;EVM0000274;EVM0004852;EVM0003283;EVM0002457;EVM0004768;EVM0010674;EVM0019923;EVM0024542;EVM0016432;EVM0013605;EVM0000564;EVM0000360;EVM0005239;EVM0019370;EVM0008248;EVM0015441;EVM0009581;EVM0006653;EVM0022426;EVM0005725;EVM0014099;EVM0007729;EVM0015281;EVM0001889
GO:0071496	cellular response to external stimulus	1	biological_process	EVM0003460;EVM0019432;EVM0020208;EVM0003283;EVM0002980;EVM0015281;EVM0000941
GO:0031668	cellular response to extracellular stimulus	1	biological_process	EVM0003460;EVM0019432;EVM0020208;EVM0003283;EVM0002980;EVM0015281;EVM0000941
GO:0042325	regulation of phosphorylation	1	biological_process	EVM0019432;EVM0003283;EVM0007729;EVM0015281
GO:0048878	chemical homeostasis	1	biological_process	EVM0010507;EVM0022547;EVM0013332;EVM0000274;EVM0014186;EVM0023121;EVM0008448
GO:0031226	intrinsic component of plasma membrane	1	cellular_component	EVM0004250;EVM0015770;EVM0007346;EVM0016946;EVM0013026
GO:0046863	ribulose-1,5-bisphosphate carboxylase/oxygenase activator activity	1	molecular_function	EVM0010517
GO:0042549	photosystem II stabilization	1	biological_process	EVM0023381
GO:0031526	brush border membrane	1	cellular_component	EVM0007729
GO:0045466	R7 cell differentiation	1	biological_process	EVM0007729
GO:0052744	phosphatidylinositol monophosphate phosphatase activity	1	molecular_function	EVM0012920
GO:0015793	glycerol transport	1	biological_process	EVM0020208
GO:0001752	compound eye photoreceptor fate commitment	1	biological_process	EVM0007729
GO:2000121	regulation of removal of superoxide radicals	1	biological_process	EVM0017312
GO:0050870	positive regulation of T cell activation	1	biological_process	EVM0007729
GO:0006936	muscle contraction	1	biological_process	EVM0007729
GO:0006937	regulation of muscle contraction	1	biological_process	EVM0007729
GO:0098519	nucleotide phosphatase activity, acting on free nucleotides	1	molecular_function	EVM0007932
GO:0060491	regulation of cell projection assembly	1	biological_process	EVM0007729
GO:0010657	muscle cell apoptotic process	1	biological_process	EVM0007729
GO:0045583	regulation of cytotoxic T cell differentiation	1	biological_process	EVM0007729
GO:0018258	protein O-linked glycosylation via hydroxyproline	1	biological_process	EVM0003082
GO:0003979	UDP-glucose 6-dehydrogenase activity	1	molecular_function	EVM0009470
GO:0030235	nitric-oxide synthase regulator activity	1	molecular_function	EVM0007729
GO:0031936	negative regulation of chromatin silencing	1	biological_process	EVM0017877
GO:0051353	positive regulation of oxidoreductase activity	1	biological_process	EVM0017312
GO:0051766	inositol trisphosphate kinase activity	1	molecular_function	EVM0004852
GO:0033160	positive regulation of protein import into nucleus, translocation	1	biological_process	EVM0007729
GO:0017136	NAD-dependent histone deacetylase activity	1	molecular_function	EVM0005590
GO:1901031	regulation of response to reactive oxygen species	1	biological_process	EVM0017312
GO:0030320	cellular monovalent inorganic anion homeostasis	1	biological_process	EVM0000274
GO:0017110	nucleoside-diphosphatase activity	1	molecular_function	EVM0007932
GO:0001890	placenta development	1	biological_process	EVM0007729
GO:0008016	regulation of heart contraction	1	biological_process	EVM0007729
GO:0031253	cell projection membrane	1	cellular_component	EVM0007729
GO:0070403	NAD+ binding	1	molecular_function	EVM0005590
GO:0044620	ACP phosphopantetheine attachment site binding	1	molecular_function	EVM0013827
GO:0022410	circadian sleep/wake cycle process	1	biological_process	EVM0007729
GO:0008293	torso signaling pathway	1	biological_process	EVM0007729
GO:0005903	brush border	1	cellular_component	EVM0007729
GO:0060452	positive regulation of cardiac muscle contraction	1	biological_process	EVM0007729
GO:0048663	neuron fate commitment	1	biological_process	EVM0007729
GO:0015603	iron chelate transmembrane transporter activity	1	molecular_function	EVM0017881
GO:1904407	positive regulation of nitric oxide metabolic process	1	biological_process	EVM0007729
GO:0045815	positive regulation of gene expression, epigenetic	1	biological_process	EVM0017877
GO:0010384	cell wall proteoglycan metabolic process	1	biological_process	EVM0003082
GO:0098862	cluster of actin-based cell projections	1	cellular_component	EVM0007729
GO:0010405	arabinogalactan protein metabolic process	1	biological_process	EVM0003082
GO:0010404	cell wall hydroxyproline-rich glycoprotein metabolic process	1	biological_process	EVM0003082
GO:0015168	glycerol transmembrane transporter activity	1	molecular_function	EVM0020208
GO:0030241	skeletal muscle myosin thick filament assembly	1	biological_process	EVM0007729
GO:0030240	skeletal muscle thin filament assembly	1	biological_process	EVM0007729
GO:0010658	striated muscle cell apoptotic process	1	biological_process	EVM0007729
GO:0010659	cardiac muscle cell apoptotic process	1	biological_process	EVM0007729
GO:0030643	cellular phosphate ion homeostasis	1	biological_process	EVM0000274
GO:0008840	4-hydroxy-tetrahydrodipicolinate synthase	1	molecular_function	EVM0016967
GO:0019103	pyrimidine nucleotide binding	1	molecular_function	EVM0007729
GO:0009945	radial axis specification	1	biological_process	EVM0001830
GO:0005506	iron ion binding	1	molecular_function	EVM0001654
GO:0001884	pyrimidine nucleoside binding	1	molecular_function	EVM0007729
GO:0016730	oxidoreductase activity, acting on iron-sulfur proteins as donors	1	molecular_function	EVM0010386
GO:0045785	positive regulation of cell adhesion	1	biological_process	EVM0007729
GO:0032206	positive regulation of telomere maintenance	1	biological_process	EVM0005725
GO:0050881	musculoskeletal movement	1	biological_process	EVM0007729
GO:0007465	R7 cell fate commitment	1	biological_process	EVM0007729
GO:0004373	glycogen (starch) synthase activity	1	molecular_function	EVM0010324
GO:1902745	positive regulation of lamellipodium organization	1	biological_process	EVM0007729
GO:1902743	regulation of lamellipodium organization	1	biological_process	EVM0007729
GO:0070932	histone H3 deacetylation	1	biological_process	EVM0005590
GO:0000036	ACP phosphopantetheine attachment site binding involved in fatty acid biosynthetic process	1	molecular_function	EVM0013827
GO:0000491	small nucleolar ribonucleoprotein complex assembly	1	biological_process	EVM0005725
GO:0004496	mevalonate kinase activity	1	molecular_function	EVM0002457
GO:0046969	NAD-dependent histone deacetylase activity (H3-K9 specific)	1	molecular_function	EVM0005590
GO:0051249	regulation of lymphocyte activation	1	biological_process	EVM0007729
GO:0032564	dATP binding	1	molecular_function	EVM0007729
GO:0045989	positive regulation of striated muscle contraction	1	biological_process	EVM0007729
GO:0048769	sarcomerogenesis	1	biological_process	EVM0007729
GO:0045187	regulation of circadian sleep/wake cycle, sleep	1	biological_process	EVM0007729
GO:1903708	positive regulation of hemopoiesis	1	biological_process	EVM0007729
GO:0005705	polytene chromosome interband	1	cellular_component	EVM0007729
GO:0045040	protein import into mitochondrial outer membrane	1	biological_process	EVM0007729
GO:0006942	regulation of striated muscle contraction	1	biological_process	EVM0007729
GO:0034979	NAD-dependent protein deacetylase activity	1	molecular_function	EVM0005590
GO:1903524	positive regulation of blood circulation	1	biological_process	EVM0007729
GO:1903522	regulation of blood circulation	1	biological_process	EVM0007729
GO:0009643	photosynthetic acclimation	1	biological_process	EVM0019763
GO:0050795	regulation of behavior	1	biological_process	EVM0007729
GO:0050863	regulation of T cell activation	1	biological_process	EVM0007729
GO:0045933	positive regulation of muscle contraction	1	biological_process	EVM0007729
GO:0002134	UTP binding	1	molecular_function	EVM0007729
GO:0002135	CTP binding	1	molecular_function	EVM0007729
GO:0051196	regulation of coenzyme metabolic process	1	biological_process	EVM0009581
GO:0051192	prosthetic group binding	1	molecular_function	EVM0013827
GO:0032092	positive regulation of protein binding	1	biological_process	EVM0007729
GO:0097285	obsolete cell-type specific apoptotic process	1	biological_process	EVM0007729
GO:0090257	regulation of muscle system process	1	biological_process	EVM0007729
GO:0060338	regulation of type I interferon-mediated signaling pathway	1	biological_process	EVM0007729
GO:0001764	neuron migration	1	biological_process	EVM0007729
GO:1900407	regulation of cellular response to oxidative stress	1	biological_process	EVM0017312
GO:0050865	regulation of cell activation	1	biological_process	EVM0007729
GO:0050867	positive regulation of cell activation	1	biological_process	EVM0007729
GO:0048500	signal recognition particle	1	cellular_component	EVM0008012
GO:0003956	NAD(P)+-protein-arginine ADP-ribosyltransferase activity	1	molecular_function	EVM0005590
GO:0033158	regulation of protein import into nucleus, translocation	1	biological_process	EVM0007729
GO:0045621	positive regulation of lymphocyte differentiation	1	biological_process	EVM0007729
GO:0002694	regulation of leukocyte activation	1	biological_process	EVM0007729
GO:0002696	positive regulation of leukocyte activation	1	biological_process	EVM0007729
GO:1903039	positive regulation of leukocyte cell-cell adhesion	1	biological_process	EVM0007729
GO:1903037	regulation of leukocyte cell-cell adhesion	1	biological_process	EVM0007729
GO:0046552	photoreceptor cell fate commitment	1	biological_process	EVM0007729
GO:0045947	negative regulation of translational initiation	1	biological_process	EVM0020160
GO:1990003	IDP phosphatase activity	1	molecular_function	EVM0007932
GO:0050999	regulation of nitric-oxide synthase activity	1	biological_process	EVM0007729
GO:0004382	guanosine-diphosphatase activity	1	molecular_function	EVM0007932
GO:1902882	regulation of response to oxidative stress	1	biological_process	EVM0017312
GO:0031674	I band	1	cellular_component	EVM0007729
GO:0033356	UDP-L-arabinose metabolic process	1	biological_process	EVM0005239
GO:0051131	chaperone-mediated protein complex assembly	1	biological_process	EVM0007729
GO:0032129	histone deacetylase activity (H3-K9 specific)	1	molecular_function	EVM0005590
GO:0022407	regulation of cell-cell adhesion	1	biological_process	EVM0007729
GO:0022409	positive regulation of cell-cell adhesion	1	biological_process	EVM0007729
GO:0010591	regulation of lamellipodium assembly	1	biological_process	EVM0007729
GO:0010592	positive regulation of lamellipodium assembly	1	biological_process	EVM0007729
GO:0016297	acyl-[acyl-carrier-protein] hydrolase activity	1	molecular_function	EVM0013827
GO:0046398	UDP-glucuronate metabolic process	1	biological_process	EVM0005239
GO:0080085	signal recognition particle, chloroplast targeting	1	cellular_component	EVM0008012
GO:0040024	dauer larval development	1	biological_process	EVM0007729
GO:0030018	Z disc	1	cellular_component	EVM0007729
GO:0042706	eye photoreceptor cell fate commitment	1	biological_process	EVM0007729
GO:1903428	positive regulation of reactive oxygen species biosynthetic process	1	biological_process	EVM0007729
GO:1903426	regulation of reactive oxygen species biosynthetic process	1	biological_process	EVM0007729
GO:0045134	uridine-diphosphatase activity	1	molecular_function	EVM0007932
GO:0051980	iron-nicotianamine transmembrane transporter activity	1	molecular_function	EVM0017881
GO:0030002	cellular anion homeostasis	1	biological_process	EVM0000274
GO:0031409	pigment binding	1	molecular_function	EVM0013600
GO:0045580	regulation of T cell differentiation	1	biological_process	EVM0007729
GO:0045582	positive regulation of T cell differentiation	1	biological_process	EVM0007729
GO:0045585	positive regulation of cytotoxic T cell differentiation	1	biological_process	EVM0007729
GO:1904358	positive regulation of telomere maintenance via telomere lengthening	1	biological_process	EVM0005725
GO:0010489	UDP-4-keto-6-deoxy-glucose-3,5-epimerase activity	1	molecular_function	EVM0008248
GO:0042745	circadian sleep/wake cycle	1	biological_process	EVM0007729
GO:0042749	regulation of circadian sleep/wake cycle	1	biological_process	EVM0007729
GO:0030911	TPR domain binding	1	molecular_function	EVM0007729
GO:0032212	positive regulation of telomere maintenance via telomerase	1	biological_process	EVM0005725
GO:0007008	outer mitochondrial membrane organization	1	biological_process	EVM0007729
GO:0003009	skeletal muscle contraction	1	biological_process	EVM0007729
GO:0090151	establishment of protein localization to mitochondrial membrane	1	biological_process	EVM0007729
GO:0072502	cellular trivalent inorganic anion homeostasis	1	biological_process	EVM0000274
GO:0072501	cellular divalent inorganic anion homeostasis	1	biological_process	EVM0000274
GO:0060969	negative regulation of gene silencing	1	biological_process	EVM0017877
GO:0030093	chloroplast photosystem I	1	cellular_component	EVM0014099
GO:0032558	adenyl deoxyribonucleotide binding	1	molecular_function	EVM0007729
GO:0032554	purine deoxyribonucleotide binding	1	molecular_function	EVM0007729
GO:0032557	pyrimidine ribonucleotide binding	1	molecular_function	EVM0007729
GO:0032551	pyrimidine ribonucleoside binding	1	molecular_function	EVM0007729
GO:0032552	deoxyribonucleotide binding	1	molecular_function	EVM0007729
GO:0055117	regulation of cardiac muscle contraction	1	biological_process	EVM0007729
GO:0006941	striated muscle contraction	1	biological_process	EVM0007729
GO:0010490	UDP-4-keto-rhamnose-4-keto-reductase activity	1	molecular_function	EVM0008248
GO:0045619	regulation of lymphocyte differentiation	1	biological_process	EVM0007729
GO:1902107	positive regulation of leukocyte differentiation	1	biological_process	EVM0007729
GO:1902105	regulation of leukocyte differentiation	1	biological_process	EVM0007729
GO:0045429	positive regulation of nitric oxide biosynthetic process	1	biological_process	EVM0007729
GO:0045428	regulation of nitric oxide biosynthetic process	1	biological_process	EVM0007729
GO:0045823	positive regulation of heart contraction	1	biological_process	EVM0007729
GO:0051251	positive regulation of lymphocyte activation	1	biological_process	EVM0007729
GO:0009654	photosystem II oxygen evolving complex	1	cellular_component	EVM0023381
GO:0014866	skeletal myofibril assembly	1	biological_process	EVM0007729
GO:0043436	oxoacid metabolic process	1	biological_process	EVM0020588;EVM0002554;EVM0014649;EVM0014316;EVM0018344;EVM0003679;EVM0007794;EVM0016432;EVM0012199;EVM0013827;EVM0007171;EVM0005239;EVM0010683;EVM0006653;EVM0005082;EVM0000941
GO:0046835	carbohydrate phosphorylation	1	biological_process	EVM0014316;EVM0004852
GO:0006082	organic acid metabolic process	1	biological_process	EVM0020588;EVM0002554;EVM0014649;EVM0014316;EVM0018344;EVM0003679;EVM0007794;EVM0016432;EVM0012199;EVM0013827;EVM0007171;EVM0005239;EVM0010683;EVM0006653;EVM0005082;EVM0000941
GO:0050790	regulation of catalytic activity	1	biological_process	EVM0020160;EVM0019432;EVM0003283;EVM0010517;EVM0017312;EVM0007729;EVM0015281
GO:0048518	positive regulation of biological process	1	biological_process	EVM0010346;EVM0013332;EVM0019432;EVM0007916;EVM0003283;EVM0004440;EVM0016615;EVM0014186;EVM0017312;EVM0017877;EVM0016772;EVM0005725;EVM0005619;EVM0007729;EVM0015281;EVM0013783
GO:0005886	plasma membrane	1	cellular_component	EVM0004250;EVM0015770;EVM0022647;EVM0012920;EVM0020785;EVM0012336;EVM0015617;EVM0001953;EVM0007188;EVM0008567;EVM0020208;EVM0017881;EVM0007916;EVM0010817;EVM0007346;EVM0009327;EVM0018344;EVM0024461;EVM0021498;EVM0007065;EVM0009637;EVM0002980;EVM0002517;EVM0004768;EVM0010674;EVM0000034;EVM0017015;EVM0008471;EVM0014754;EVM0012199;EVM0000564;EVM0018355;EVM0016772;EVM0019370;EVM0008248;EVM0012252;EVM…
GO:0009706	chloroplast inner membrane	1	cellular_component	EVM0023697;EVM0019546;EVM0011174;EVM0010683;EVM0014297
GO:0005975	carbohydrate metabolic process	1	biological_process	EVM0020588;EVM0014316;EVM0004852;EVM0013605;EVM0010324;EVM0005590;EVM0003082;EVM0002293;EVM0009470;EVM0022812
GO:0065007	biological regulation	1	biological_process	EVM0001086;EVM0009694;EVM0011755;EVM0003561;EVM0004676;EVM0010507;EVM0005326;EVM0022547;EVM0020160;EVM0010346;EVM0001167;EVM0013332;EVM0008567;EVM0004448;EVM0019432;EVM0023381;EVM0006465;EVM0007916;EVM0010817;EVM0000274;EVM0015947;EVM0003283;EVM0010517;EVM0002980;EVM0004440;EVM0004768;EVM0016615;EVM0010674;EVM0017015;EVM0019923;EVM0014186;EVM0003108;EVM0014754;EVM0019998;EVM0005843;EVM0019225;EVM…
GO:0009528	plastid inner membrane	1	cellular_component	EVM0023697;EVM0019546;EVM0011174;EVM0010683;EVM0014297

## Sheet: Salt  48h
id	description	q-value	namespace	genes_in_study
GO:0042470	melanosome	0	cellular_component	EVM0015281;EVM0021211;EVM0003283;EVM0010674;EVM0007729;EVM0019432
GO:0048770	pigment granule	0	cellular_component	EVM0015281;EVM0021211;EVM0003283;EVM0010674;EVM0007729;EVM0019432
GO:0005788	endoplasmic reticulum lumen	0	cellular_component	EVM0015281;EVM0021211;EVM0022547;EVM0003283;EVM0007916;EVM0017015;EVM0019244;EVM0019432
GO:0071353	cellular response to interleukin-4	0	biological_process	EVM0015281;EVM0003283;EVM0007729;EVM0019432
GO:0070670	response to interleukin-4	0	biological_process	EVM0015281;EVM0003283;EVM0007729;EVM0019432
GO:0009644	response to high light intensity	0	biological_process	EVM0005619;EVM0015798;EVM0021498;EVM0020785;EVM0003460;EVM0004853;EVM0008012;EVM0021781;EVM0003138;EVM0006448;EVM0006954
GO:0006986	response to unfolded protein	0.002	biological_process	EVM0015281;EVM0005619;EVM0003460;EVM0003283;EVM0007729;EVM0019432
GO:0000302	response to reactive oxygen species	0.002	biological_process	EVM0013186;EVM0005619;EVM0015798;EVM0019286;EVM0021498;EVM0020785;EVM0003460;EVM0002152;EVM0004853;EVM0017982;EVM0021781;EVM0003138;EVM0006448;EVM0000941;EVM0006954;EVM0003457
GO:0006457	protein folding	0.002	biological_process	EVM0015281;EVM0021211;EVM0019286;EVM0005725;EVM0003460;EVM0003283;EVM0010674;EVM0007729;EVM0021781;EVM0003138;EVM0012360;EVM0006448;EVM0006954;EVM0000411
GO:0009314	response to radiation	0.002	biological_process	EVM0004395;EVM0005619;EVM0023007;EVM0015798;EVM0021498;EVM0020785;EVM0003460;EVM0002152;EVM0004853;EVM0005615;EVM0008012;EVM0021781;EVM0003138;EVM0023121;EVM0006448;EVM0019225;EVM0017589;EVM0005161;EVM0006954;EVM0003457
GO:0009642	response to light intensity	0.004	biological_process	EVM0005619;EVM0015798;EVM0021498;EVM0020785;EVM0003460;EVM0004853;EVM0008012;EVM0021781;EVM0003138;EVM0006448;EVM0006954
GO:0006979	response to oxidative stress	0.006	biological_process	EVM0013186;EVM0005619;EVM0023007;EVM0015798;EVM0021211;EVM0019286;EVM0021498;EVM0020785;EVM0003460;EVM0002152;EVM0004853;EVM0022547;EVM0017982;EVM0021781;EVM0003138;EVM0006448;EVM0000941;EVM0022009;EVM0006954;EVM0003457
GO:0051082	unfolded protein binding	0.006	molecular_function	EVM0015281;EVM0021211;EVM0019286;EVM0005725;EVM0003460;EVM0022547;EVM0003283;EVM0010674;EVM0007729;EVM0021781;EVM0019432
GO:0035966	response to topologically incorrect protein	0.006	biological_process	EVM0015281;EVM0005619;EVM0003460;EVM0003283;EVM0007729;EVM0019432
GO:0009986	cell surface	0.006	cellular_component	EVM0015281;EVM0021211;EVM0003283;EVM0007729;EVM0019432
GO:0042542	response to hydrogen peroxide	0.006	biological_process	EVM0013186;EVM0005619;EVM0015798;EVM0021498;EVM0020785;EVM0003460;EVM0002152;EVM0004853;EVM0017982;EVM0021781;EVM0003138;EVM0006448;EVM0000941;EVM0006954;EVM0003457
GO:0010035	response to inorganic substance	0.006	biological_process	EVM0013186;EVM0004395;EVM0003764;EVM0020411;EVM0005619;EVM0015798;EVM0006179;EVM0013457;EVM0021211;EVM0021498;EVM0020785;EVM0003460;EVM0002152;EVM0006603;EVM0011755;EVM0004853;EVM0012305;EVM0022547;EVM0017982;EVM0023199;EVM0021781;EVM0012502;EVM0003138;EVM0017015;EVM0023121;EVM0014754;EVM0006448;EVM0008305;EVM0009637;EVM0000941;EVM0019225;EVM0006954;EVM0003457;EVM0017312
GO:1901700	response to oxygen-containing compound	0.006	biological_process	EVM0006657;EVM0013186;EVM0002997;EVM0009694;EVM0004395;EVM0020411;EVM0005619;EVM0015798;EVM0004060;EVM0005950;EVM0013457;EVM0019286;EVM0021498;EVM0020785;EVM0003460;EVM0002152;EVM0006603;EVM0011755;EVM0004853;EVM0012305;EVM0009160;EVM0003121;EVM0017982;EVM0023199;EVM0021781;EVM0012502;EVM0003138;EVM0017015;EVM0015454;EVM0002121;EVM0014856;EVM0006448;EVM0000941;EVM0019225;EVM0017589;EVM0005161;EVM…
GO:0009408	response to heat	0.008	biological_process	EVM0013186;EVM0015281;EVM0003764;EVM0004828;EVM0005619;EVM0015798;EVM0019286;EVM0021498;EVM0020785;EVM0003460;EVM0004853;EVM0003283;EVM0010674;EVM0002943;EVM0007729;EVM0017982;EVM0021781;EVM0012502;EVM0003138;EVM0014754;EVM0006448;EVM0009637;EVM0006954
GO:0051297	centrosome organization	0.008	biological_process	EVM0015281;EVM0003283;EVM0007729;EVM0011000;EVM0014457
GO:0007098	centrosome cycle	0.008	biological_process	EVM0015281;EVM0003283;EVM0007729;EVM0011000;EVM0014457
GO:0031023	microtubule organizing center organization	0.008	biological_process	EVM0015281;EVM0003283;EVM0007729;EVM0011000;EVM0014457
GO:0009416	response to light stimulus	0.012	biological_process	EVM0004395;EVM0005619;EVM0023007;EVM0015798;EVM0021498;EVM0020785;EVM0003460;EVM0002152;EVM0004853;EVM0005615;EVM0008012;EVM0021781;EVM0003138;EVM0023121;EVM0006448;EVM0019225;EVM0017589;EVM0005161;EVM0006954;EVM0003457
GO:0009266	response to temperature stimulus	0.012	biological_process	EVM0013186;EVM0004395;EVM0015281;EVM0003764;EVM0004828;EVM0005619;EVM0015798;EVM0004060;EVM0019286;EVM0021498;EVM0020785;EVM0003460;EVM0002152;EVM0004853;EVM0003283;EVM0010674;EVM0002943;EVM0007729;EVM0017982;EVM0021781;EVM0012502;EVM0003138;EVM0017015;EVM0002121;EVM0014754;EVM0006448;EVM0009637;EVM0004448;EVM0005161;EVM0006954;EVM0003457;EVM0017312
GO:0006950	response to stress	0.012	biological_process	EVM0013186;EVM0004395;EVM0015281;EVM0003764;EVM0020411;EVM0004828;EVM0005619;EVM0023007;EVM0015798;EVM0004060;EVM0013457;EVM0021211;EVM0019286;EVM0021498;EVM0005725;EVM0020785;EVM0003460;EVM0002152;EVM0011755;EVM0004853;EVM0005615;EVM0012305;EVM0022547;EVM0003283;EVM0010346;EVM0003121;EVM0010674;EVM0002943;EVM0007729;EVM0017982;EVM0023199;EVM0021781;EVM0012502;EVM0003138;EVM0017015;EVM0006282;EVM…
GO:0005811	lipid particle	0.014	cellular_component	EVM0004395;EVM0015281;EVM0003283;EVM0007729;EVM0011000;EVM0014457
GO:0060904	regulation of protein folding in endoplasmic reticulum	0.014	biological_process	EVM0015281;EVM0003283;EVM0019432
GO:0021680	cerebellar Purkinje cell layer development	0.014	biological_process	EVM0015281;EVM0003283;EVM0019432
GO:0030902	hindbrain development	0.014	biological_process	EVM0015281;EVM0003283;EVM0019432
GO:0021577	hindbrain structural organization	0.014	biological_process	EVM0015281;EVM0003283;EVM0019432
GO:0021575	hindbrain morphogenesis	0.014	biological_process	EVM0015281;EVM0003283;EVM0019432
GO:0034663	endoplasmic reticulum chaperone complex	0.014	cellular_component	EVM0015281;EVM0003283;EVM0019432
GO:0021695	cerebellar cortex development	0.014	biological_process	EVM0015281;EVM0003283;EVM0019432
GO:0021587	cerebellum morphogenesis	0.014	biological_process	EVM0015281;EVM0003283;EVM0019432
GO:0021589	cerebellum structural organization	0.014	biological_process	EVM0015281;EVM0003283;EVM0019432
GO:0021549	cerebellum development	0.014	biological_process	EVM0015281;EVM0003283;EVM0019432
GO:0022037	metencephalon development	0.014	biological_process	EVM0015281;EVM0003283;EVM0019432
GO:0010038	response to metal ion	0.014	biological_process	EVM0013186;EVM0004395;EVM0003764;EVM0006179;EVM0021211;EVM0021498;EVM0020785;EVM0002152;EVM0022547;EVM0017982;EVM0017015;EVM0023121;EVM0014754;EVM0008305;EVM0009637;EVM0019225;EVM0003457;EVM0017312
GO:0043167	ion binding	0.014	molecular_function	EVM0004395;EVM0015281;EVM0019286;EVM0021498;EVM0020785;EVM0002152;EVM0022547;EVM0003283;EVM0009160;EVM0010674;EVM0007729;EVM0009637;EVM0011091;EVM0005161;EVM0001654;EVM0011317;EVM0003457;EVM0019432;EVM0003561;EVM0017312
GO:0031982	vesicle	0.014	cellular_component	EVM0011829;EVM0004395;EVM0004395;EVM0015281;EVM0015281;EVM0019120;EVM0018866;EVM0021211;EVM0021211;EVM0003283;EVM0003283;EVM0010674;EVM0010674;EVM0003082;EVM0007729;EVM0007729;EVM0004356;EVM0022812;EVM0007336;EVM0019432;EVM0019432
GO:0050896	response to stimulus	0.014	biological_process	EVM0006657;EVM0013186;EVM0002997;EVM0009694;EVM0004395;EVM0022630;EVM0015281;EVM0003764;EVM0020411;EVM0004828;EVM0005619;EVM0023007;EVM0015798;EVM0021293;EVM0006179;EVM0008348;EVM0004060;EVM0005950;EVM0013457;EVM0021211;EVM0019286;EVM0021498;EVM0005725;EVM0020785;EVM0003460;EVM0002152;EVM0006603;EVM0011755;EVM0004853;EVM0005615;EVM0016809;EVM0012305;EVM0022547;EVM0003283;EVM0009160;EVM0010346;EVM…
GO:0009628	response to abiotic stimulus	0.014	biological_process	EVM0013186;EVM0004395;EVM0015281;EVM0003764;EVM0020411;EVM0004828;EVM0005619;EVM0023007;EVM0015798;EVM0004060;EVM0013457;EVM0019286;EVM0021498;EVM0005725;EVM0020785;EVM0003460;EVM0002152;EVM0011755;EVM0004853;EVM0005615;EVM0016809;EVM0012305;EVM0022547;EVM0003283;EVM0003121;EVM0010674;EVM0002943;EVM0007729;EVM0017982;EVM0023199;EVM0008012;EVM0021781;EVM0012502;EVM0003138;EVM0017015;EVM0002121;EVM…
GO:0034620	cellular response to unfolded protein	0.014	biological_process	EVM0015281;EVM0005619;EVM0003460;EVM0003283;EVM0019432
GO:0035967	cellular response to topologically incorrect protein	0.014	biological_process	EVM0015281;EVM0005619;EVM0003460;EVM0003283;EVM0019432
GO:0042060	wound healing	0.014	biological_process	EVM0004395;EVM0015281;EVM0003283;EVM0019432
GO:0046686	response to cadmium ion	0.014	biological_process	EVM0013186;EVM0004395;EVM0003764;EVM0021211;EVM0021498;EVM0020785;EVM0002152;EVM0022547;EVM0017982;EVM0017015;EVM0014754;EVM0008305;EVM0009637;EVM0019225;EVM0003457;EVM0017312
GO:0042221	response to chemical	0.014	biological_process	EVM0006657;EVM0013186;EVM0002997;EVM0009694;EVM0004395;EVM0022630;EVM0015281;EVM0003764;EVM0020411;EVM0005619;EVM0023007;EVM0015798;EVM0021293;EVM0006179;EVM0004060;EVM0005950;EVM0013457;EVM0021211;EVM0019286;EVM0021498;EVM0005725;EVM0020785;EVM0003460;EVM0002152;EVM0006603;EVM0011755;EVM0004853;EVM0012305;EVM0022547;EVM0003283;EVM0009160;EVM0003121;EVM0007729;EVM0017982;EVM0023199;EVM0021781;EVM…
GO:0005793	endoplasmic reticulum-Golgi intermediate compartment	0.014	cellular_component	EVM0015281;EVM0021211;EVM0003283;EVM0019432
GO:0005737	cytoplasm	0.018	cellular_component	EVM0001640;EVM0013186;EVM0020514;EVM0014947;EVM0017865;EVM0011829;EVM0015976;EVM0004395;EVM0015281;EVM0019120;EVM0019421;EVM0003764;EVM0020411;EVM0018866;EVM0004828;EVM0005619;EVM0023007;EVM0010333;EVM0015798;EVM0015655;EVM0002457;EVM0008946;EVM0021293;EVM0006179;EVM0010884;EVM0008348;EVM0022646;EVM0015947;EVM0005950;EVM0009602;EVM0021211;EVM0021881;EVM0024461;EVM0019286;EVM0021498;EVM0005725;EVM…
GO:0031410	cytoplasmic vesicle	0.018	cellular_component	EVM0011829;EVM0015281;EVM0015281;EVM0019120;EVM0018866;EVM0021211;EVM0021211;EVM0003283;EVM0003283;EVM0010674;EVM0010674;EVM0003082;EVM0007729;EVM0007729;EVM0004356;EVM0022812;EVM0007336;EVM0019432;EVM0019432
GO:0002576	platelet degranulation	0.018	biological_process	EVM0015281;EVM0003283;EVM0019432
GO:0030168	platelet activation	0.018	biological_process	EVM0015281;EVM0003283;EVM0019432
GO:0006983	ER overload response	0.018	biological_process	EVM0015281;EVM0003283;EVM0019432
GO:1903332	regulation of protein folding	0.018	biological_process	EVM0015281;EVM0003283;EVM0019432
GO:0042044	fluid transport	0.018	biological_process	EVM0019421;EVM0020411;EVM0013457;EVM0001335;EVM0013704
GO:0006833	water transport	0.018	biological_process	EVM0019421;EVM0020411;EVM0013457;EVM0001335;EVM0013704
GO:0008150	biological_process	0.024	biological_process	EVM0006657;EVM0001485;EVM0004312;EVM0013186;EVM0020514;EVM0002997;EVM0017865;EVM0011829;EVM0009694;EVM0021572;EVM0015976;EVM0004395;EVM0022630;EVM0015281;EVM0019421;EVM0003764;EVM0020411;EVM0018866;EVM0004828;EVM0005619;EVM0023007;EVM0015798;EVM0015655;EVM0020184;EVM0002457;EVM0008946;EVM0021293;EVM0006179;EVM0008348;EVM0004060;EVM0015947;EVM0005950;EVM0013457;EVM0021211;EVM0024461;EVM0019286;EVM…
GO:0005488	binding	0.028	molecular_function	EVM0002997;EVM0004395;EVM0022630;EVM0015281;EVM0021211;EVM0019286;EVM0021498;EVM0005725;EVM0020785;EVM0003460;EVM0002152;EVM0012305;EVM0022547;EVM0003283;EVM0009160;EVM0016615;EVM0010674;EVM0007729;EVM0023199;EVM0021781;EVM0011000;EVM0009637;EVM0011091;EVM0019225;EVM0017589;EVM0004448;EVM0005161;EVM0001654;EVM0011317;EVM0003457;EVM0019432;EVM0003561;EVM0017312;EVM0014457
GO:0071705	nitrogen compound transport	0.028	biological_process	EVM0015281;EVM0019421;EVM0008348;EVM0005725;EVM0003460;EVM0006603;EVM0008480;EVM0003283;EVM0010674;EVM0007729;EVM0001335;EVM0008012;EVM0017015;EVM0009560;EVM0013704
GO:0051298	centrosome duplication	0.028	biological_process	EVM0015281;EVM0003283;EVM0011000;EVM0014457
GO:0042026	protein refolding	0.028	biological_process	EVM0019286;EVM0005725;EVM0010674;EVM0007729
GO:0051087	chaperone binding	0.028	molecular_function	EVM0015281;EVM0019286;EVM0003283;EVM0019432
GO:0030674	protein binding, bridging	0.03	molecular_function	EVM0015281;EVM0003283;EVM0019432
GO:0017015	regulation of transforming growth factor beta receptor signaling pathway	0.03	biological_process	EVM0015281;EVM0003283;EVM0019432
GO:0042807	central vacuole	0.03	cellular_component	EVM0019421;EVM0001335;EVM0001262
GO:0006887	exocytosis	0.03	biological_process	EVM0015281;EVM0003283;EVM0019432
GO:0030512	negative regulation of transforming growth factor beta receptor signaling pathway	0.03	biological_process	EVM0015281;EVM0003283;EVM0019432
GO:0040019	positive regulation of embryonic development	0.03	biological_process	EVM0015281;EVM0003283;EVM0019432
GO:1903845	negative regulation of cellular response to transforming growth factor beta stimulus	0.03	biological_process	EVM0015281;EVM0003283;EVM0019432
GO:1903844	regulation of cellular response to transforming growth factor beta stimulus	0.03	biological_process	EVM0015281;EVM0003283;EVM0019432
GO:0090101	negative regulation of transmembrane receptor protein serine/threonine kinase signaling pathway	0.03	biological_process	EVM0015281;EVM0003283;EVM0019432
GO:0043022	ribosome binding	0.03	molecular_function	EVM0015281;EVM0003283;EVM0019432
GO:0042149	cellular response to glucose starvation	0.03	biological_process	EVM0015281;EVM0003283;EVM0019432
GO:0045055	regulated exocytosis	0.03	biological_process	EVM0015281;EVM0003283;EVM0019432
GO:0044765	single-organism transport	0.042	biological_process	EVM0015281;EVM0019421;EVM0020411;EVM0021293;EVM0008348;EVM0013457;EVM0005725;EVM0003460;EVM0006603;EVM0011755;EVM0008480;EVM0003283;EVM0010674;EVM0007729;EVM0001335;EVM0008012;EVM0017015;EVM0008448;EVM0024139;EVM0009560;EVM0008373;EVM0013704;EVM0019432;EVM0017881
GO:1902578	single-organism localization	0.046	biological_process	EVM0015281;EVM0019421;EVM0020411;EVM0021293;EVM0008348;EVM0013457;EVM0005725;EVM0003460;EVM0006603;EVM0011755;EVM0008480;EVM0003283;EVM0010674;EVM0007729;EVM0001335;EVM0008012;EVM0017015;EVM0008448;EVM0024139;EVM0009560;EVM0008373;EVM0013704;EVM0019432;EVM0017881
GO:0043581	obsolete mycelium development	0.046	biological_process	EVM0004395;EVM0019286;EVM0005725;EVM0010674
GO:0042886	amide transport	0.046	biological_process	EVM0015281;EVM0019421;EVM0005725;EVM0003283;EVM0010674;EVM0007729;EVM0001335;EVM0008012;EVM0017015;EVM0009560;EVM0013704
GO:0046034	ATP metabolic process	0.048	biological_process	EVM0020514;EVM0004395;EVM0015281;EVM0019286;EVM0005725;EVM0015441;EVM0003283;EVM0014316;EVM0010674;EVM0007729;EVM0019432
GO:0061077	chaperone-mediated protein folding	0.05	biological_process	EVM0019286;EVM0005725;EVM0003460;EVM0010674
GO:0043021	ribonucleoprotein complex binding	0.052	molecular_function	EVM0015281;EVM0003283;EVM0019432
GO:0060090	binding, bridging	0.052	molecular_function	EVM0015281;EVM0003283;EVM0019432
GO:0090092	regulation of transmembrane receptor protein serine/threonine kinase signaling pathway	0.052	biological_process	EVM0015281;EVM0003283;EVM0019432
GO:0005576	extracellular region	0.054	cellular_component	EVM0002997;EVM0004395;EVM0015281;EVM0018866;EVM0021211;EVM0021498;EVM0020785;EVM0002152;EVM0006525;EVM0022547;EVM0003283;EVM0010346;EVM0017015;EVM0002121;EVM0012360;EVM0014754;EVM0019244;EVM0017589;EVM0005161;EVM0003457;EVM0019432;EVM0017312
GO:0009167	purine ribonucleoside monophosphate metabolic process	0.054	biological_process	EVM0020514;EVM0004395;EVM0015281;EVM0019286;EVM0005725;EVM0015441;EVM0003283;EVM0014316;EVM0010674;EVM0007729;EVM0019432
GO:0009126	purine nucleoside monophosphate metabolic process	0.054	biological_process	EVM0020514;EVM0004395;EVM0015281;EVM0019286;EVM0005725;EVM0015441;EVM0003283;EVM0014316;EVM0010674;EVM0007729;EVM0019432
GO:0009161	ribonucleoside monophosphate metabolic process	0.056	biological_process	EVM0020514;EVM0004395;EVM0015281;EVM0019286;EVM0005725;EVM0015441;EVM0003283;EVM0014316;EVM0010674;EVM0007729;EVM0019432
GO:0009123	nucleoside monophosphate metabolic process	0.058	biological_process	EVM0020514;EVM0004395;EVM0015281;EVM0019286;EVM0005725;EVM0015441;EVM0003283;EVM0014316;EVM0010674;EVM0007729;EVM0019432
GO:0005515	protein binding	0.058	molecular_function	EVM0002997;EVM0004395;EVM0015281;EVM0021211;EVM0019286;EVM0005725;EVM0003460;EVM0022547;EVM0003283;EVM0009160;EVM0010674;EVM0007729;EVM0021781;EVM0019432;EVM0003561
GO:0090287	regulation of cellular response to growth factor stimulus	0.058	biological_process	EVM0015281;EVM0003283;EVM0019432
GO:0090288	negative regulation of cellular response to growth factor stimulus	0.058	biological_process	EVM0015281;EVM0003283;EVM0019432
GO:0007420	brain development	0.058	biological_process	EVM0015281;EVM0003283;EVM0019432
GO:0005739	mitochondrion	0.062	cellular_component	EVM0001640;EVM0020514;EVM0017865;EVM0004395;EVM0003764;EVM0004828;EVM0023007;EVM0008946;EVM0021498;EVM0005725;EVM0020785;EVM0005729;EVM0003460;EVM0002152;EVM0008480;EVM0015441;EVM0022547;EVM0010674;EVM0007729;EVM0021536;EVM0017015;EVM0012360;EVM0004427;EVM0022936;EVM0017589;EVM0001654;EVM0003457;EVM0017312
GO:0071496	cellular response to external stimulus	0.072	biological_process	EVM0015281;EVM0003460;EVM0002152;EVM0012305;EVM0003283;EVM0000966;EVM0000941;EVM0003457;EVM0019432
GO:0031668	cellular response to extracellular stimulus	0.072	biological_process	EVM0015281;EVM0003460;EVM0002152;EVM0012305;EVM0003283;EVM0000966;EVM0000941;EVM0003457;EVM0019432
GO:0044444	cytoplasmic part	0.074	cellular_component	EVM0001640;EVM0020514;EVM0014947;EVM0017865;EVM0011829;EVM0015976;EVM0004395;EVM0015281;EVM0019120;EVM0019421;EVM0003764;EVM0020411;EVM0018866;EVM0004828;EVM0023007;EVM0010333;EVM0015655;EVM0002457;EVM0008946;EVM0021293;EVM0006179;EVM0010884;EVM0008348;EVM0005950;EVM0021211;EVM0021881;EVM0024461;EVM0019286;EVM0021498;EVM0005725;EVM0020785;EVM0005729;EVM0003460;EVM0012336;EVM0002152;EVM0016771;EVM…
GO:0051179	localization	0.074	biological_process	EVM0004395;EVM0015281;EVM0019421;EVM0020411;EVM0021293;EVM0008348;EVM0013457;EVM0019286;EVM0005725;EVM0003460;EVM0006603;EVM0011755;EVM0008480;EVM0003283;EVM0010674;EVM0007729;EVM0001335;EVM0008012;EVM0017015;EVM0008448;EVM0024139;EVM0009560;EVM0008373;EVM0013704;EVM0019432;EVM0017881
GO:0048046	apoplast	0.074	cellular_component	EVM0002997;EVM0004395;EVM0021498;EVM0020785;EVM0002152;EVM0006525;EVM0022547;EVM0017015;EVM0002121;EVM0012360;EVM0014754;EVM0017589;EVM0005161;EVM0003457;EVM0017312
GO:0005524	ATP binding	0.074	molecular_function	EVM0019286;EVM0021498;EVM0020785;EVM0010674;EVM0007729;EVM0009637;EVM0005161
GO:0005372	water transmembrane transporter activity	0.074	molecular_function	EVM0019421;EVM0020411;EVM0001335;EVM0013704
GO:0044877	macromolecular complex binding	0.074	molecular_function	EVM0015281;EVM0003283;EVM0023199;EVM0019432
GO:0015250	water channel activity	0.074	molecular_function	EVM0019421;EVM0020411;EVM0001335;EVM0013704
GO:0006810	transport	0.082	biological_process	EVM0004395;EVM0015281;EVM0019421;EVM0020411;EVM0021293;EVM0008348;EVM0013457;EVM0005725;EVM0003460;EVM0006603;EVM0011755;EVM0008480;EVM0003283;EVM0010674;EVM0007729;EVM0001335;EVM0008012;EVM0017015;EVM0008448;EVM0024139;EVM0009560;EVM0008373;EVM0013704;EVM0019432;EVM0017881
GO:0030554	adenyl nucleotide binding	0.084	molecular_function	EVM0019286;EVM0021498;EVM0020785;EVM0010674;EVM0007729;EVM0009637;EVM0005161
GO:0032559	adenyl ribonucleotide binding	0.084	molecular_function	EVM0019286;EVM0021498;EVM0020785;EVM0010674;EVM0007729;EVM0009637;EVM0005161
GO:0051234	establishment of localization	0.084	biological_process	EVM0004395;EVM0015281;EVM0019421;EVM0020411;EVM0021293;EVM0008348;EVM0013457;EVM0005725;EVM0003460;EVM0006603;EVM0011755;EVM0008480;EVM0003283;EVM0010674;EVM0007729;EVM0001335;EVM0008012;EVM0017015;EVM0008448;EVM0024139;EVM0009560;EVM0008373;EVM0013704;EVM0019432;EVM0017881
GO:0009267	cellular response to starvation	0.084	biological_process	EVM0015281;EVM0003460;EVM0002152;EVM0003283;EVM0000966;EVM0003457;EVM0019432
GO:0050817	coagulation	0.084	biological_process	EVM0015281;EVM0003283;EVM0019432
GO:0001775	cell activation	0.084	biological_process	EVM0015281;EVM0003283;EVM0019432
GO:0032075	positive regulation of nuclease activity	0.084	biological_process	EVM0015281;EVM0003283;EVM0019432
GO:0006987	activation of signaling protein activity involved in unfolded protein response	0.084	biological_process	EVM0015281;EVM0003283;EVM0019432
GO:0032069	regulation of nuclease activity	0.084	biological_process	EVM0015281;EVM0003283;EVM0019432
GO:0007599	hemostasis	0.084	biological_process	EVM0015281;EVM0003283;EVM0019432
GO:0007596	blood coagulation	0.084	biological_process	EVM0015281;EVM0003283;EVM0019432
GO:0045995	regulation of embryonic development	0.084	biological_process	EVM0015281;EVM0003283;EVM0019432
GO:0007417	central nervous system development	0.084	biological_process	EVM0015281;EVM0003283;EVM0019432
GO:0033554	cellular response to stress	0.11	biological_process	EVM0015281;EVM0005619;EVM0023007;EVM0004060;EVM0021211;EVM0019286;EVM0005725;EVM0003460;EVM0002152;EVM0005615;EVM0012305;EVM0003283;EVM0010674;EVM0000966;EVM0000941;EVM0003457;EVM0019432
GO:0032940	secretion by cell	0.11	biological_process	EVM0015281;EVM0003283;EVM0017015;EVM0019432
GO:0003674	molecular_function	0.114	molecular_function	EVM0006657;EVM0001485;EVM0004312;EVM0020514;EVM0002997;EVM0017865;EVM0011829;EVM0009694;EVM0021572;EVM0015976;EVM0004395;EVM0022630;EVM0015281;EVM0019421;EVM0020411;EVM0018866;EVM0005619;EVM0023007;EVM0015655;EVM0020184;EVM0002457;EVM0021293;EVM0008348;EVM0004060;EVM0015947;EVM0021211;EVM0024461;EVM0019286;EVM0021498;EVM0005725;EVM0020785;EVM0003460;EVM0002152;EVM0006603;EVM0016771;EVM0016772;EVM…
GO:0006970	response to osmotic stress	0.114	biological_process	EVM0004395;EVM0003764;EVM0004828;EVM0023007;EVM0005725;EVM0011755;EVM0022547;EVM0003121;EVM0007729;EVM0021781;EVM0003138;EVM0017015;EVM0006448;EVM0000941;EVM0019225;EVM0006954
GO:0071702	organic substance transport	0.114	biological_process	EVM0015281;EVM0019421;EVM0008348;EVM0005725;EVM0003460;EVM0008480;EVM0003283;EVM0010674;EVM0007729;EVM0001335;EVM0008012;EVM0017015;EVM0009560;EVM0008373;EVM0013704
GO:0051787	misfolded protein binding	0.12	molecular_function	EVM0015281;EVM0003283;EVM0019432
GO:1903322	positive regulation of protein modification by small protein conjugation or removal	0.12	biological_process	EVM0015281;EVM0003283;EVM0019432
GO:0030496	midbody	0.12	cellular_component	EVM0015281;EVM0003283;EVM0019432
GO:0031398	positive regulation of protein ubiquitination	0.12	biological_process	EVM0015281;EVM0003283;EVM0019432
GO:0071216	cellular response to biotic stimulus	0.12	biological_process	EVM0015281;EVM0003283;EVM0019432
GO:0006995	cellular response to nitrogen starvation	0.12	biological_process	EVM0002152;EVM0000966;EVM0003457
GO:1901135	carbohydrate derivative metabolic process	0.142	biological_process	EVM0020514;EVM0004395;EVM0015281;EVM0021293;EVM0019286;EVM0005725;EVM0005729;EVM0015441;EVM0003283;EVM0014316;EVM0010674;EVM0003082;EVM0007729;EVM0022812;EVM0019244;EVM0019432
GO:0046903	secretion	0.142	biological_process	EVM0015281;EVM0003283;EVM0017015;EVM0019432
GO:0043066	negative regulation of apoptotic process	0.142	biological_process	EVM0015281;EVM0003283;EVM0007729;EVM0019432
GO:0031669	cellular response to nutrient levels	0.142	biological_process	EVM0015281;EVM0003460;EVM0002152;EVM0003283;EVM0000966;EVM0003457;EVM0019432
GO:0042594	response to starvation	0.142	biological_process	EVM0015281;EVM0003460;EVM0002152;EVM0003283;EVM0000966;EVM0003457;EVM0019432
GO:0052510	positive regulation by organism of defense response of other organism involved in symbiotic interaction	0.144	biological_process	EVM0010346;EVM0007916
GO:0052257	pathogen-associated molecular pattern dependent induction by organism of innate immune response of other organism involved in symbiotic interaction	0.144	biological_process	EVM0010346;EVM0007916
GO:0052033	pathogen-associated molecular pattern dependent induction by symbiont of host innate immune response	0.144	biological_process	EVM0010346;EVM0007916
GO:0052306	modulation by organism of innate immune response in other organism involved in symbiotic interaction	0.144	biological_process	EVM0010346;EVM0007916
GO:0052305	positive regulation by organism of innate immune response in other organism involved in symbiotic interaction	0.144	biological_process	EVM0010346;EVM0007916
GO:0052308	pathogen-associated molecular pattern dependent modulation by organism of innate immune response in other organism involved in symbiotic interaction	0.144	biological_process	EVM0010346;EVM0007916
GO:0052509	positive regulation by symbiont of host defense response	0.144	biological_process	EVM0010346;EVM0007916
GO:0052166	positive regulation by symbiont of host innate immune response	0.144	biological_process	EVM0010346;EVM0007916
GO:0052167	modulation by symbiont of host innate immune response	0.144	biological_process	EVM0010346;EVM0007916
GO:0052169	pathogen-associated molecular pattern dependent modulation by symbiont of host innate immune response	0.144	biological_process	EVM0010346;EVM0007916
GO:0010033	response to organic substance	0.212	biological_process	EVM0006657;EVM0013186;EVM0002997;EVM0009694;EVM0004395;EVM0022630;EVM0015281;EVM0005619;EVM0021293;EVM0004060;EVM0005950;EVM0003460;EVM0002152;EVM0003283;EVM0009160;EVM0003121;EVM0007729;EVM0017982;EVM0012502;EVM0015454;EVM0002121;EVM0014856;EVM0000941;EVM0019225;EVM0017589;EVM0005161;EVM0003457;EVM0019432;EVM0003561
GO:0044267	cellular protein metabolic process	0.212	biological_process	EVM0004312;EVM0021572;EVM0015281;EVM0018866;EVM0021211;EVM0019286;EVM0021498;EVM0005725;EVM0020785;EVM0003460;EVM0013093;EVM0003283;EVM0010674;EVM0003082;EVM0007729;EVM0022812;EVM0021781;EVM0003138;EVM0012360;EVM0006448;EVM0019244;EVM0006954;EVM0019432;EVM0000411
GO:0009991	response to extracellular stimulus	0.212	biological_process	EVM0015281;EVM0003460;EVM0002152;EVM0012305;EVM0003283;EVM0000966;EVM0000941;EVM0003457;EVM0019432
GO:0034976	response to endoplasmic reticulum stress	0.212	biological_process	EVM0015281;EVM0021211;EVM0003283;EVM0019432
GO:0071345	cellular response to cytokine stimulus	0.212	biological_process	EVM0015281;EVM0003283;EVM0007729;EVM0019432
GO:0009144	purine nucleoside triphosphate metabolic process	0.212	biological_process	EVM0020514;EVM0004395;EVM0015281;EVM0019286;EVM0005725;EVM0015441;EVM0003283;EVM0014316;EVM0010674;EVM0007729;EVM0019432
GO:0009205	purine ribonucleoside triphosphate metabolic process	0.212	biological_process	EVM0020514;EVM0004395;EVM0015281;EVM0019286;EVM0005725;EVM0015441;EVM0003283;EVM0014316;EVM0010674;EVM0007729;EVM0019432
GO:0009199	ribonucleoside triphosphate metabolic process	0.212	biological_process	EVM0020514;EVM0004395;EVM0015281;EVM0019286;EVM0005725;EVM0015441;EVM0003283;EVM0014316;EVM0010674;EVM0007729;EVM0019432
GO:0050878	regulation of body fluid levels	0.212	biological_process	EVM0015281;EVM0003283;EVM0019432
GO:0015204	urea transmembrane transporter activity	0.212	molecular_function	EVM0019421;EVM0001335;EVM0013704
GO:0015840	urea transport	0.212	biological_process	EVM0019421;EVM0001335;EVM0013704
GO:0071918	urea transmembrane transport	0.212	biological_process	EVM0019421;EVM0001335;EVM0013704
GO:0009141	nucleoside triphosphate metabolic process	0.22	biological_process	EVM0020514;EVM0004395;EVM0015281;EVM0019286;EVM0005725;EVM0015441;EVM0003283;EVM0014316;EVM0010674;EVM0007729;EVM0019432
GO:0034097	response to cytokine	0.22	biological_process	EVM0015281;EVM0003283;EVM0007729;EVM0019432
GO:0005623	cell	0.222	cellular_component	EVM0006657;EVM0001640;EVM0001485;EVM0013186;EVM0020514;EVM0014947;EVM0002997;EVM0017865;EVM0011829;EVM0009694;EVM0015976;EVM0004395;EVM0022630;EVM0015281;EVM0009505;EVM0019120;EVM0019421;EVM0003764;EVM0020411;EVM0018866;EVM0004828;EVM0005619;EVM0023007;EVM0010333;EVM0015798;EVM0015655;EVM0004116;EVM0002457;EVM0008946;EVM0021293;EVM0006179;EVM0010884;EVM0008348;EVM0022646;EVM0004060;EVM0015947;EVM…
GO:0044464	cell part	0.222	cellular_component	EVM0006657;EVM0001640;EVM0001485;EVM0013186;EVM0020514;EVM0014947;EVM0002997;EVM0017865;EVM0011829;EVM0009694;EVM0015976;EVM0004395;EVM0022630;EVM0015281;EVM0009505;EVM0019120;EVM0019421;EVM0003764;EVM0020411;EVM0018866;EVM0004828;EVM0005619;EVM0023007;EVM0010333;EVM0015798;EVM0015655;EVM0004116;EVM0002457;EVM0008946;EVM0021293;EVM0006179;EVM0010884;EVM0008348;EVM0022646;EVM0004060;EVM0015947;EVM…
GO:0009169	purine ribonucleoside monophosphate catabolic process	0.222	biological_process	EVM0020514;EVM0015281;EVM0019286;EVM0005725;EVM0015441;EVM0003283;EVM0010674;EVM0007729;EVM0019432
GO:0009158	ribonucleoside monophosphate catabolic process	0.222	biological_process	EVM0020514;EVM0015281;EVM0019286;EVM0005725;EVM0015441;EVM0003283;EVM0010674;EVM0007729;EVM0019432
GO:0006200	obsolete ATP catabolic process	0.222	biological_process	EVM0020514;EVM0015281;EVM0019286;EVM0005725;EVM0015441;EVM0003283;EVM0010674;EVM0007729;EVM0019432
GO:0009125	nucleoside monophosphate catabolic process	0.222	biological_process	EVM0020514;EVM0015281;EVM0019286;EVM0005725;EVM0015441;EVM0003283;EVM0010674;EVM0007729;EVM0019432
GO:0009128	purine nucleoside monophosphate catabolic process	0.222	biological_process	EVM0020514;EVM0015281;EVM0019286;EVM0005725;EVM0015441;EVM0003283;EVM0010674;EVM0007729;EVM0019432
GO:0005622	intracellular	0.222	cellular_component	EVM0006657;EVM0001640;EVM0013186;EVM0020514;EVM0014947;EVM0017865;EVM0011829;EVM0009694;EVM0015976;EVM0004395;EVM0022630;EVM0015281;EVM0019120;EVM0019421;EVM0003764;EVM0020411;EVM0018866;EVM0004828;EVM0005619;EVM0023007;EVM0010333;EVM0015798;EVM0015655;EVM0002457;EVM0008946;EVM0021293;EVM0006179;EVM0010884;EVM0008348;EVM0022646;EVM0004060;EVM0015947;EVM0005950;EVM0009602;EVM0021211;EVM0021881;EVM…
GO:0044424	intracellular part	0.222	cellular_component	EVM0006657;EVM0001640;EVM0013186;EVM0020514;EVM0014947;EVM0017865;EVM0011829;EVM0009694;EVM0015976;EVM0004395;EVM0022630;EVM0015281;EVM0019120;EVM0019421;EVM0003764;EVM0020411;EVM0018866;EVM0004828;EVM0005619;EVM0023007;EVM0010333;EVM0015798;EVM0015655;EVM0002457;EVM0008946;EVM0021293;EVM0006179;EVM0010884;EVM0008348;EVM0022646;EVM0004060;EVM0015947;EVM0005950;EVM0009602;EVM0021211;EVM0021881;EVM…
GO:0019538	protein metabolic process	0.228	biological_process	EVM0004312;EVM0021572;EVM0015281;EVM0018866;EVM0021211;EVM0019286;EVM0021498;EVM0005725;EVM0020785;EVM0003460;EVM0013093;EVM0003283;EVM0010674;EVM0003082;EVM0007729;EVM0022812;EVM0021781;EVM0003138;EVM0012360;EVM0006448;EVM0019244;EVM0006954;EVM0019432;EVM0000411
GO:0005509	calcium ion binding	0.228	molecular_function	EVM0015281;EVM0022547;EVM0003283;EVM0011317;EVM0019432
GO:0008104	protein localization	0.238	biological_process	EVM0015281;EVM0019286;EVM0005725;EVM0003283;EVM0010674;EVM0007729;EVM0008012;EVM0017015;EVM0009560
GO:0009306	protein secretion	0.238	biological_process	EVM0015281;EVM0003283;EVM0017015
GO:0019755	one-carbon compound transport	0.238	biological_process	EVM0019421;EVM0001335;EVM0013704
GO:0002790	peptide secretion	0.238	biological_process	EVM0015281;EVM0003283;EVM0017015
GO:0044403	symbiosis, encompassing mutualism through parasitism	0.25	biological_process	EVM0004395;EVM0004060;EVM0021498;EVM0020785;EVM0010346;EVM0007916;EVM0014754
GO:0016887	ATPase activity	0.252	molecular_function	EVM0020514;EVM0015281;EVM0019286;EVM0005725;EVM0015441;EVM0003283;EVM0010674;EVM0007729;EVM0019432
GO:0044093	positive regulation of molecular function	0.254	biological_process	EVM0015281;EVM0003283;EVM0007729;EVM0005161;EVM0019432;EVM0017312
GO:0009605	response to external stimulus	0.254	biological_process	EVM0004395;EVM0015281;EVM0008348;EVM0004060;EVM0021211;EVM0021498;EVM0020785;EVM0003460;EVM0002152;EVM0012305;EVM0003283;EVM0010346;EVM0007916;EVM0007729;EVM0006282;EVM0002121;EVM0000966;EVM0014754;EVM0000941;EVM0005161;EVM0003457;EVM0019432;EVM0017881;EVM0016833
GO:0034605	cellular response to heat	0.254	biological_process	EVM0005619;EVM0019286;EVM0003460;EVM0010674
GO:0051259	protein oligomerization	0.254	biological_process	EVM0017865;EVM0003138;EVM0006448;EVM0006954
GO:0070887	cellular response to chemical stimulus	0.262	biological_process	EVM0015281;EVM0005619;EVM0023007;EVM0021293;EVM0021211;EVM0019286;EVM0005725;EVM0003460;EVM0002152;EVM0012305;EVM0003283;EVM0009160;EVM0007729;EVM0012502;EVM0000941;EVM0003457;EVM0019432;EVM0003561
GO:0044419	interspecies interaction between organisms	0.266	biological_process	EVM0004395;EVM0004060;EVM0021498;EVM0020785;EVM0010346;EVM0007916;EVM0014754
GO:0043085	positive regulation of catalytic activity	0.266	biological_process	EVM0015281;EVM0003283;EVM0007729;EVM0005161;EVM0019432;EVM0017312
GO:0030968	endoplasmic reticulum unfolded protein response	0.266	biological_process	EVM0015281;EVM0003283;EVM0019432
GO:0030176	integral component of endoplasmic reticulum membrane	0.266	cellular_component	EVM0015281;EVM0003283;EVM0019432
GO:0031227	intrinsic component of endoplasmic reticulum membrane	0.266	cellular_component	EVM0015281;EVM0003283;EVM0019432
GO:0000322	storage vacuole	0.276	cellular_component	EVM0004395;EVM0019421;EVM0010674;EVM0001335
GO:0033674	positive regulation of kinase activity	0.276	biological_process	EVM0015281;EVM0003283;EVM0007729;EVM0019432
GO:0045860	positive regulation of protein kinase activity	0.276	biological_process	EVM0015281;EVM0003283;EVM0007729;EVM0019432
GO:0031667	response to nutrient levels	0.284	biological_process	EVM0015281;EVM0003460;EVM0002152;EVM0003283;EVM0000966;EVM0003457;EVM0019432
GO:0072657	protein localization to membrane	0.296	biological_process	EVM0010674;EVM0007729;EVM0008012;EVM0009560
GO:0042981	regulation of apoptotic process	0.296	biological_process	EVM0015281;EVM0003283;EVM0007729;EVM0019432
GO:0090150	establishment of protein localization to membrane	0.296	biological_process	EVM0010674;EVM0007729;EVM0008012;EVM0009560
GO:0005618	cell wall	0.3	cellular_component	EVM0001485;EVM0002997;EVM0005950;EVM0021211;EVM0021498;EVM0020785;EVM0001811;EVM0002152;EVM0014285;EVM0010674;EVM0002943;EVM0013798;EVM0009258;EVM0014754;EVM0009637;EVM0005161;EVM0003457
GO:1903320	regulation of protein modification by small protein conjugation or removal	0.306	biological_process	EVM0015281;EVM0003283;EVM0019432
GO:0043562	cellular response to nitrogen levels	0.306	biological_process	EVM0002152;EVM0000966;EVM0003457
GO:0006984	ER-nucleus signaling pathway	0.306	biological_process	EVM0015281;EVM0003283;EVM0019432
GO:0031396	regulation of protein ubiquitination	0.306	biological_process	EVM0015281;EVM0003283;EVM0019432
GO:0042743	hydrogen peroxide metabolic process	0.306	biological_process	EVM0005729;EVM0002152;EVM0003457
GO:0043627	response to estrogen	0.312	biological_process	EVM0004395;EVM0007729
GO:0030016	myofibril	0.312	cellular_component	EVM0004395;EVM0007729
GO:0030017	sarcomere	0.312	cellular_component	EVM0004395;EVM0007729
GO:0004096	catalase activity	0.312	molecular_function	EVM0002152;EVM0003457
GO:2000379	positive regulation of reactive oxygen species metabolic process	0.312	biological_process	EVM0007729;EVM0017312
GO:0030312	external encapsulating structure	0.382	cellular_component	EVM0001485;EVM0002997;EVM0005950;EVM0021211;EVM0021498;EVM0020785;EVM0001811;EVM0002152;EVM0014285;EVM0010674;EVM0002943;EVM0013798;EVM0009258;EVM0014754;EVM0009637;EVM0005161;EVM0003457
GO:0015031	protein transport	0.382	biological_process	EVM0015281;EVM0005725;EVM0003283;EVM0010674;EVM0007729;EVM0008012;EVM0017015;EVM0009560
GO:0034599	cellular response to oxidative stress	0.382	biological_process	EVM0023007;EVM0021211;EVM0019286;EVM0002152;EVM0000941;EVM0003457
GO:0042327	positive regulation of phosphorylation	0.382	biological_process	EVM0015281;EVM0003283;EVM0007729;EVM0019432
GO:0001934	positive regulation of protein phosphorylation	0.382	biological_process	EVM0015281;EVM0003283;EVM0007729;EVM0019432
GO:0045184	establishment of protein localization	0.394	biological_process	EVM0015281;EVM0005725;EVM0003283;EVM0010674;EVM0007729;EVM0008012;EVM0017015;EVM0009560
GO:0009150	purine ribonucleotide metabolic process	0.398	biological_process	EVM0020514;EVM0004395;EVM0015281;EVM0019286;EVM0005725;EVM0015441;EVM0003283;EVM0014316;EVM0010674;EVM0007729;EVM0019432
GO:0009987	cellular process	0.398	biological_process	EVM0004312;EVM0020514;EVM0002997;EVM0017865;EVM0011829;EVM0021572;EVM0004395;EVM0015281;EVM0019421;EVM0020411;EVM0018866;EVM0005619;EVM0023007;EVM0015655;EVM0002457;EVM0008946;EVM0021293;EVM0008348;EVM0004060;EVM0021211;EVM0024461;EVM0019286;EVM0021498;EVM0005725;EVM0020785;EVM0005729;EVM0003460;EVM0002152;EVM0006603;EVM0016771;EVM0005615;EVM0008480;EVM0013093;EVM0012305;EVM0015441;EVM0003283;EVM…
GO:0097305	response to alcohol	0.398	biological_process	EVM0006657;EVM0013186;EVM0002997;EVM0004395;EVM0005950;EVM0002152;EVM0009160;EVM0003121;EVM0017982;EVM0012502;EVM0014856;EVM0000941;EVM0019225;EVM0003457;EVM0003561
GO:0009615	response to virus	0.398	biological_process	EVM0004395;EVM0004060;EVM0021498;EVM0020785;EVM0014754
GO:0005575	cellular_component	0.41	cellular_component	EVM0006657;EVM0001640;EVM0001485;EVM0013186;EVM0020514;EVM0014947;EVM0002997;EVM0017865;EVM0011829;EVM0009694;EVM0015976;EVM0004395;EVM0022630;EVM0015281;EVM0009505;EVM0019120;EVM0019421;EVM0003764;EVM0020411;EVM0018866;EVM0004828;EVM0005619;EVM0023007;EVM0010333;EVM0015798;EVM0002002;EVM0015655;EVM0004116;EVM0002457;EVM0008946;EVM0021293;EVM0006179;EVM0010884;EVM0008348;EVM0022646;EVM0004060;EVM…
GO:0097708	intracellular vesicle	0.422	cellular_component	EVM0011829;EVM0015281;EVM0019120;EVM0018866;EVM0021211;EVM0003283;EVM0010674;EVM0003082;EVM0007729;EVM0004356;EVM0022812;EVM0007336;EVM0019432
GO:0051240	positive regulation of multicellular organismal process	0.422	biological_process	EVM0004395;EVM0015281;EVM0003283;EVM0007729;EVM0019432
GO:0019637	organophosphate metabolic process	0.424	biological_process	EVM0020514;EVM0004395;EVM0015281;EVM0021293;EVM0019286;EVM0005725;EVM0015441;EVM0003283;EVM0014316;EVM0010674;EVM0002135;EVM0007729;EVM0016432;EVM0019432
GO:0006163	purine nucleotide metabolic process	0.424	biological_process	EVM0020514;EVM0004395;EVM0015281;EVM0019286;EVM0005725;EVM0015441;EVM0003283;EVM0014316;EVM0010674;EVM0007729;EVM0019432
GO:0036503	ERAD pathway	0.424	biological_process	EVM0015281;EVM0003283;EVM0019432
GO:0030433	ubiquitin-dependent ERAD pathway	0.424	biological_process	EVM0015281;EVM0003283;EVM0019432
GO:0046688	response to copper ion	0.424	biological_process	EVM0013186;EVM0017982;EVM0023121
GO:0009259	ribonucleotide metabolic process	0.438	biological_process	EVM0020514;EVM0004395;EVM0015281;EVM0019286;EVM0005725;EVM0015441;EVM0003283;EVM0014316;EVM0010674;EVM0007729;EVM0019432
GO:0051641	cellular localization	0.438	biological_process	EVM0015281;EVM0005725;EVM0003460;EVM0003283;EVM0010674;EVM0007729;EVM0008012;EVM0017015;EVM0008448;EVM0009560;EVM0019432
GO:0051649	establishment of localization in cell	0.438	biological_process	EVM0015281;EVM0005725;EVM0003460;EVM0003283;EVM0010674;EVM0007729;EVM0008012;EVM0017015;EVM0009560;EVM0019432
GO:0005774	vacuolar membrane	0.438	cellular_component	EVM0014947;EVM0019421;EVM0008946;EVM0021211;EVM0021498;EVM0020785;EVM0022547;EVM0010674;EVM0001335;EVM0017015;EVM0014754;EVM0022936;EVM0008448;EVM0024139;EVM0017589;EVM0013704;EVM0001262
GO:0071806	protein transmembrane transport	0.446	biological_process	EVM0010674;EVM0007729;EVM0008012;EVM0009560
GO:0045937	positive regulation of phosphate metabolic process	0.446	biological_process	EVM0015281;EVM0003283;EVM0007729;EVM0019432
GO:0010562	positive regulation of phosphorus metabolic process	0.446	biological_process	EVM0015281;EVM0003283;EVM0007729;EVM0019432
GO:0065002	intracellular protein transmembrane transport	0.446	biological_process	EVM0010674;EVM0007729;EVM0008012;EVM0009560
GO:0009117	nucleotide metabolic process	0.448	biological_process	EVM0020514;EVM0004395;EVM0015281;EVM0021293;EVM0019286;EVM0005725;EVM0015441;EVM0003283;EVM0014316;EVM0010674;EVM0007729;EVM0019432
GO:1901363	heterocyclic compound binding	0.46	molecular_function	EVM0004395;EVM0022630;EVM0019286;EVM0021498;EVM0020785;EVM0003460;EVM0012305;EVM0016615;EVM0010674;EVM0007729;EVM0023199;EVM0011000;EVM0009637;EVM0019225;EVM0017589;EVM0004448;EVM0005161;EVM0014457
GO:0051094	positive regulation of developmental process	0.46	biological_process	EVM0004395;EVM0015281;EVM0003283;EVM0007729;EVM0019432
GO:0033036	macromolecule localization	0.466	biological_process	EVM0015281;EVM0019286;EVM0005725;EVM0003460;EVM0003283;EVM0010674;EVM0007729;EVM0008012;EVM0017015;EVM0009560
GO:0019693	ribose phosphate metabolic process	0.466	biological_process	EVM0020514;EVM0004395;EVM0015281;EVM0019286;EVM0005725;EVM0015441;EVM0003283;EVM0014316;EVM0010674;EVM0007729;EVM0019432
GO:0044437	vacuolar part	0.468	cellular_component	EVM0014947;EVM0019421;EVM0008946;EVM0021211;EVM0021498;EVM0020785;EVM0022547;EVM0010674;EVM0001335;EVM0017015;EVM0014754;EVM0022936;EVM0008448;EVM0024139;EVM0017589;EVM0013704;EVM0001262
GO:0006753	nucleoside phosphate metabolic process	0.468	biological_process	EVM0020514;EVM0004395;EVM0015281;EVM0021293;EVM0019286;EVM0005725;EVM0015441;EVM0003283;EVM0014316;EVM0010674;EVM0007729;EVM0019432
GO:0046872	metal ion binding	0.478	molecular_function	EVM0004395;EVM0015281;EVM0002152;EVM0022547;EVM0003283;EVM0011091;EVM0001654;EVM0011317;EVM0003457;EVM0019432;EVM0017312
GO:0055085	transmembrane transport	0.48	biological_process	EVM0019421;EVM0020411;EVM0008348;EVM0006603;EVM0008480;EVM0010674;EVM0007729;EVM0001335;EVM0008012;EVM0008448;EVM0024139;EVM0009560;EVM0008373;EVM0013704;EVM0017881
GO:0072593	reactive oxygen species metabolic process	0.48	biological_process	EVM0005729;EVM0002152;EVM0007729;EVM0003457
GO:0065008	regulation of biological quality	0.486	biological_process	EVM0015281;EVM0021293;EVM0005725;EVM0011755;EVM0012305;EVM0022547;EVM0003283;EVM0010346;EVM0007916;EVM0007729;EVM0023121;EVM0008448;EVM0000941;EVM0019432
GO:0072521	purine-containing compound metabolic process	0.486	biological_process	EVM0020514;EVM0004395;EVM0015281;EVM0019286;EVM0005725;EVM0015441;EVM0003283;EVM0014316;EVM0010674;EVM0007729;EVM0019432
GO:0044421	extracellular region part	0.488	cellular_component	EVM0004395;EVM0015281;EVM0021211;EVM0003283;EVM0007729
GO:0052555	positive regulation by organism of immune response of other organism involved in symbiotic interaction	0.492	biological_process	EVM0010346;EVM0007916
GO:0052556	positive regulation by symbiont of host immune response	0.492	biological_process	EVM0010346;EVM0007916
GO:0052553	modulation by symbiont of host immune response	0.492	biological_process	EVM0010346;EVM0007916
GO:0052552	modulation by organism of immune response of other organism involved in symbiotic interaction	0.492	biological_process	EVM0010346;EVM0007916
GO:0052255	modulation by organism of defense response of other organism involved in symbiotic interaction	0.492	biological_process	EVM0010346;EVM0007916
GO:0052031	modulation by symbiont of host defense response	0.492	biological_process	EVM0010346;EVM0007916
GO:0043292	contractile fiber	0.492	cellular_component	EVM0004395;EVM0007729
GO:0051341	regulation of oxidoreductase activity	0.492	biological_process	EVM0007729;EVM0017312
GO:0044449	contractile fiber part	0.492	cellular_component	EVM0004395;EVM0007729
GO:0043169	cation binding	0.558	molecular_function	EVM0004395;EVM0015281;EVM0002152;EVM0022547;EVM0003283;EVM0011091;EVM0001654;EVM0011317;EVM0003457;EVM0019432;EVM0017312
GO:0048518	positive regulation of biological process	0.56	biological_process	EVM0004395;EVM0015281;EVM0005619;EVM0005725;EVM0016772;EVM0003283;EVM0010346;EVM0016615;EVM0007916;EVM0007729;EVM0012502;EVM0019244;EVM0019432;EVM0017312
GO:0051347	positive regulation of transferase activity	0.56	biological_process	EVM0015281;EVM0003283;EVM0007729;EVM0019432
GO:0016684	oxidoreductase activity, acting on peroxide as acceptor	0.572	molecular_function	EVM0002152;EVM0022009;EVM0003457
GO:0004601	peroxidase activity	0.572	molecular_function	EVM0002152;EVM0022009;EVM0003457
GO:0007399	nervous system development	0.576	biological_process	EVM0015281;EVM0003283;EVM0007729;EVM0019432
GO:0009166	nucleotide catabolic process	0.586	biological_process	EVM0020514;EVM0015281;EVM0019286;EVM0005725;EVM0015441;EVM0003283;EVM0010674;EVM0007729;EVM0019432
GO:0009143	nucleoside triphosphate catabolic process	0.586	biological_process	EVM0020514;EVM0015281;EVM0019286;EVM0005725;EVM0015441;EVM0003283;EVM0010674;EVM0007729;EVM0019432
GO:0009146	purine nucleoside triphosphate catabolic process	0.586	biological_process	EVM0020514;EVM0015281;EVM0019286;EVM0005725;EVM0015441;EVM0003283;EVM0010674;EVM0007729;EVM0019432
GO:0009261	ribonucleotide catabolic process	0.586	biological_process	EVM0020514;EVM0015281;EVM0019286;EVM0005725;EVM0015441;EVM0003283;EVM0010674;EVM0007729;EVM0019432
GO:0009207	purine ribonucleoside triphosphate catabolic process	0.586	biological_process	EVM0020514;EVM0015281;EVM0019286;EVM0005725;EVM0015441;EVM0003283;EVM0010674;EVM0007729;EVM0019432
GO:0009203	ribonucleoside triphosphate catabolic process	0.586	biological_process	EVM0020514;EVM0015281;EVM0019286;EVM0005725;EVM0015441;EVM0003283;EVM0010674;EVM0007729;EVM0019432
GO:1901292	nucleoside phosphate catabolic process	0.586	biological_process	EVM0020514;EVM0015281;EVM0019286;EVM0005725;EVM0015441;EVM0003283;EVM0010674;EVM0007729;EVM0019432
GO:0009154	purine ribonucleotide catabolic process	0.586	biological_process	EVM0020514;EVM0015281;EVM0019286;EVM0005725;EVM0015441;EVM0003283;EVM0010674;EVM0007729;EVM0019432
GO:0006195	purine nucleotide catabolic process	0.586	biological_process	EVM0020514;EVM0015281;EVM0019286;EVM0005725;EVM0015441;EVM0003283;EVM0010674;EVM0007729;EVM0019432
GO:0006626	protein targeting to mitochondrion	0.59	biological_process	EVM0005725;EVM0010674;EVM0007729
GO:0072655	establishment of protein localization to mitochondrion	0.59	biological_process	EVM0005725;EVM0010674;EVM0007729
GO:0070585	protein localization to mitochondrion	0.59	biological_process	EVM0005725;EVM0010674;EVM0007729
GO:0046130	purine ribonucleoside catabolic process	0.608	biological_process	EVM0020514;EVM0015281;EVM0019286;EVM0005725;EVM0015441;EVM0003283;EVM0010674;EVM0007729;EVM0019432
GO:0055086	nucleobase-containing small molecule metabolic process	0.608	biological_process	EVM0020514;EVM0004395;EVM0015281;EVM0021293;EVM0019286;EVM0005725;EVM0015441;EVM0003283;EVM0014316;EVM0010674;EVM0007729;EVM0019432
GO:0006152	purine nucleoside catabolic process	0.608	biological_process	EVM0020514;EVM0015281;EVM0019286;EVM0005725;EVM0015441;EVM0003283;EVM0010674;EVM0007729;EVM0019432
GO:0097159	organic cyclic compound binding	0.608	molecular_function	EVM0004395;EVM0022630;EVM0019286;EVM0021498;EVM0020785;EVM0003460;EVM0012305;EVM0016615;EVM0010674;EVM0007729;EVM0023199;EVM0011000;EVM0009637;EVM0019225;EVM0017589;EVM0004448;EVM0005161;EVM0014457
GO:0016818	hydrolase activity, acting on acid anhydrides, in phosphorus-containing anhydrides	0.608	molecular_function	EVM0020514;EVM0015281;EVM0019286;EVM0005725;EVM0016771;EVM0015441;EVM0003283;EVM0010674;EVM0007729;EVM0019432
GO:0016462	pyrophosphatase activity	0.608	molecular_function	EVM0020514;EVM0015281;EVM0019286;EVM0005725;EVM0016771;EVM0015441;EVM0003283;EVM0010674;EVM0007729;EVM0019432
GO:0009164	nucleoside catabolic process	0.608	biological_process	EVM0020514;EVM0015281;EVM0019286;EVM0005725;EVM0015441;EVM0003283;EVM0010674;EVM0007729;EVM0019432
GO:0042454	ribonucleoside catabolic process	0.608	biological_process	EVM0020514;EVM0015281;EVM0019286;EVM0005725;EVM0015441;EVM0003283;EVM0010674;EVM0007729;EVM0019432
GO:0005773	vacuole	0.608	cellular_component	EVM0014947;EVM0004395;EVM0019421;EVM0008946;EVM0021211;EVM0021498;EVM0020785;EVM0002152;EVM0022547;EVM0010674;EVM0001335;EVM0017015;EVM0015454;EVM0014754;EVM0022936;EVM0008448;EVM0020530;EVM0024139;EVM0017589;EVM0013704;EVM0003457;EVM0001262
GO:0035639	purine ribonucleoside triphosphate binding	0.608	molecular_function	EVM0019286;EVM0021498;EVM0020785;EVM0010674;EVM0007729;EVM0009637;EVM0005161
GO:0072523	purine-containing compound catabolic process	0.608	biological_process	EVM0020514;EVM0015281;EVM0019286;EVM0005725;EVM0015441;EVM0003283;EVM0010674;EVM0007729;EVM0019432
GO:0001883	purine nucleoside binding	0.626	molecular_function	EVM0019286;EVM0021498;EVM0020785;EVM0010674;EVM0007729;EVM0009637;EVM0005161
GO:0001882	nucleoside binding	0.626	molecular_function	EVM0019286;EVM0021498;EVM0020785;EVM0010674;EVM0007729;EVM0009637;EVM0005161
GO:0032549	ribonucleoside binding	0.626	molecular_function	EVM0019286;EVM0021498;EVM0020785;EVM0010674;EVM0007729;EVM0009637;EVM0005161
GO:0017076	purine nucleotide binding	0.626	molecular_function	EVM0019286;EVM0021498;EVM0020785;EVM0010674;EVM0007729;EVM0009637;EVM0005161
GO:0032555	purine ribonucleotide binding	0.626	molecular_function	EVM0019286;EVM0021498;EVM0020785;EVM0010674;EVM0007729;EVM0009637;EVM0005161
GO:0032550	purine ribonucleoside binding	0.626	molecular_function	EVM0019286;EVM0021498;EVM0020785;EVM0010674;EVM0007729;EVM0009637;EVM0005161
GO:0075136	response to host	0.626	biological_process	EVM0010346;EVM0007916
GO:0052572	response to host immune response	0.626	biological_process	EVM0010346;EVM0007916
GO:0052173	response to defenses of other organism involved in symbiotic interaction	0.626	biological_process	EVM0010346;EVM0007916
GO:0030431	sleep	0.626	biological_process	EVM0015281;EVM0003283
GO:0052564	response to immune response of other organism involved in symbiotic interaction	0.626	biological_process	EVM0010346;EVM0007916
GO:0052200	response to host defenses	0.626	biological_process	EVM0010346;EVM0007916
GO:0015833	peptide transport	0.684	biological_process	EVM0015281;EVM0005725;EVM0003283;EVM0010674;EVM0007729;EVM0008012;EVM0017015;EVM0009560
GO:0043069	negative regulation of programmed cell death	0.69	biological_process	EVM0015281;EVM0003283;EVM0007729;EVM0019432
GO:0032553	ribonucleotide binding	0.694	molecular_function	EVM0019286;EVM0021498;EVM0020785;EVM0010674;EVM0007729;EVM0009637;EVM0005161
GO:0046434	organophosphate catabolic process	0.694	biological_process	EVM0020514;EVM0015281;EVM0019286;EVM0005725;EVM0015441;EVM0003283;EVM0010674;EVM0007729;EVM0019432
GO:0016817	hydrolase activity, acting on acid anhydrides	0.694	molecular_function	EVM0020514;EVM0015281;EVM0019286;EVM0005725;EVM0016771;EVM0015441;EVM0003283;EVM0010674;EVM0007729;EVM0019432
GO:0031401	positive regulation of protein modification process	0.696	biological_process	EVM0015281;EVM0003283;EVM0007729;EVM0019432
GO:0031325	positive regulation of cellular metabolic process	0.702	biological_process	EVM0015281;EVM0005619;EVM0005725;EVM0016772;EVM0003283;EVM0007729;EVM0012502;EVM0019432;EVM0017312
GO:0005829	cytosol	0.706	cellular_component	EVM0015976;EVM0004395;EVM0018866;EVM0023007;EVM0002457;EVM0021293;EVM0006179;EVM0010884;EVM0021881;EVM0019286;EVM0021498;EVM0005725;EVM0020785;EVM0003460;EVM0002152;EVM0023062;EVM0009306;EVM0014316;EVM0010674;EVM0002135;EVM0007729;EVM0021781;EVM0002121;EVM0012360;EVM0009714;EVM0014754;EVM0008305;EVM0013784;EVM0009637;EVM0022009;EVM0001282;EVM0003457;EVM0000411
GO:0051345	positive regulation of hydrolase activity	0.708	biological_process	EVM0015281;EVM0003283;EVM0019432
GO:1901658	glycosyl compound catabolic process	0.716	biological_process	EVM0020514;EVM0015281;EVM0019286;EVM0005725;EVM0015441;EVM0003283;EVM0010674;EVM0007729;EVM0019432
GO:0017111	nucleoside-triphosphatase activity	0.718	molecular_function	EVM0020514;EVM0015281;EVM0019286;EVM0005725;EVM0015441;EVM0003283;EVM0010674;EVM0007729;EVM0019432
GO:0010629	negative regulation of gene expression	0.718	biological_process	EVM0009694;EVM0004395;EVM0015281;EVM0012305;EVM0003283;EVM0010674;EVM0023121;EVM0019225;EVM0004448
GO:1901136	carbohydrate derivative catabolic process	0.722	biological_process	EVM0020514;EVM0015281;EVM0019286;EVM0005725;EVM0015441;EVM0003283;EVM0010674;EVM0007729;EVM0019432
GO:0097367	carbohydrate derivative binding	0.722	molecular_function	EVM0019286;EVM0021498;EVM0020785;EVM0010674;EVM0007729;EVM0009637;EVM0005161
GO:0051173	positive regulation of nitrogen compound metabolic process	0.722	biological_process	EVM0015281;EVM0005619;EVM0005725;EVM0016772;EVM0003283;EVM0007729;EVM0012502;EVM0019432
GO:0010605	negative regulation of macromolecule metabolic process	0.786	biological_process	EVM0009694;EVM0004395;EVM0015281;EVM0012305;EVM0003283;EVM0010674;EVM0007729;EVM0023121;EVM0019225;EVM0004448
GO:0051716	cellular response to stimulus	0.786	biological_process	EVM0002997;EVM0015281;EVM0005619;EVM0023007;EVM0021293;EVM0004060;EVM0021211;EVM0019286;EVM0005725;EVM0003460;EVM0002152;EVM0005615;EVM0012305;EVM0003283;EVM0009160;EVM0010674;EVM0007729;EVM0012502;EVM0000966;EVM0019244;EVM0000941;EVM0003457;EVM0019432;EVM0003561
GO:0006461	protein complex assembly	0.79	biological_process	EVM0017865;EVM0005725;EVM0007729;EVM0003138;EVM0006448;EVM0006954
GO:0044260	cellular macromolecule metabolic process	0.792	biological_process	EVM0004312;EVM0020514;EVM0011829;EVM0021572;EVM0015281;EVM0018866;EVM0021211;EVM0019286;EVM0021498;EVM0005725;EVM0020785;EVM0003460;EVM0005615;EVM0013093;EVM0012305;EVM0015441;EVM0003283;EVM0016615;EVM0010674;EVM0003082;EVM0007729;EVM0022812;EVM0021781;EVM0003138;EVM0012360;EVM0006448;EVM0019244;EVM0006954;EVM0019432;EVM0000411
GO:0000226	microtubule cytoskeleton organization	0.796	biological_process	EVM0015281;EVM0003283;EVM0007729;EVM0011000;EVM0014457
GO:0048522	positive regulation of cellular process	0.796	biological_process	EVM0015281;EVM0005619;EVM0005725;EVM0016772;EVM0003283;EVM0016615;EVM0007729;EVM0012502;EVM0019244;EVM0019432;EVM0017312
GO:0044270	cellular nitrogen compound catabolic process	0.796	biological_process	EVM0020514;EVM0015281;EVM0019286;EVM0005725;EVM0015441;EVM0003283;EVM0010674;EVM0007729;EVM0000966;EVM0019432
GO:0060548	negative regulation of cell death	0.796	biological_process	EVM0015281;EVM0003283;EVM0007729;EVM0019432
GO:0003712	transcription cofactor activity	0.798	molecular_function	EVM0004395;EVM0004060;EVM0012502
GO:0000989	transcription factor activity, transcription factor binding	0.798	molecular_function	EVM0004395;EVM0004060;EVM0012502
GO:0070271	protein complex biogenesis	0.804	biological_process	EVM0017865;EVM0005725;EVM0007729;EVM0003138;EVM0006448;EVM0006954
GO:0044432	endoplasmic reticulum part	0.804	cellular_component	EVM0015281;EVM0021211;EVM0022547;EVM0003283;EVM0007916;EVM0004356;EVM0017015;EVM0015469;EVM0019244;EVM0019432
GO:0046128	purine ribonucleoside metabolic process	0.81	biological_process	EVM0020514;EVM0015281;EVM0019286;EVM0005725;EVM0015441;EVM0003283;EVM0010674;EVM0007729;EVM0019432
GO:0009409	response to cold	0.81	biological_process	EVM0004395;EVM0004060;EVM0002152;EVM0007729;EVM0017015;EVM0002121;EVM0014754;EVM0005161;EVM0003457;EVM0017312
GO:0042278	purine nucleoside metabolic process	0.81	biological_process	EVM0020514;EVM0015281;EVM0019286;EVM0005725;EVM0015441;EVM0003283;EVM0010674;EVM0007729;EVM0019432
GO:0009893	positive regulation of metabolic process	0.81	biological_process	EVM0015281;EVM0005619;EVM0005725;EVM0016772;EVM0003283;EVM0007729;EVM0012502;EVM0019432;EVM0017312
GO:0048523	negative regulation of cellular process	0.81	biological_process	EVM0009694;EVM0004395;EVM0015281;EVM0012305;EVM0003283;EVM0010674;EVM0007729;EVM0023121;EVM0019244;EVM0019225;EVM0004448;EVM0019432
GO:0007010	cytoskeleton organization	0.81	biological_process	EVM0015281;EVM0003460;EVM0003283;EVM0007729;EVM0011000;EVM0014457
GO:0007017	microtubule-based process	0.812	biological_process	EVM0015281;EVM0003283;EVM0007729;EVM0011000;EVM0014457
GO:0045926	negative regulation of growth	0.816	biological_process	EVM0002997;EVM0004395;EVM0012305
GO:0045859	regulation of protein kinase activity	0.824	biological_process	EVM0015281;EVM0003283;EVM0007729;EVM0019432
GO:0043549	regulation of kinase activity	0.824	biological_process	EVM0015281;EVM0003283;EVM0007729;EVM0019432
GO:0005783	endoplasmic reticulum	0.828	cellular_component	EVM0015281;EVM0018866;EVM0010333;EVM0021211;EVM0024461;EVM0012336;EVM0022547;EVM0003283;EVM0010346;EVM0007916;EVM0004356;EVM0017015;EVM0000966;EVM0015469;EVM0019244;EVM0019432
GO:0045038	protein import into chloroplast thylakoid membrane	0.828	biological_process	EVM0008012;EVM0009560
GO:1903409	reactive oxygen species biosynthetic process	0.828	biological_process	EVM0005729;EVM0007729
GO:0006265	DNA topological change	0.828	biological_process	EVM0020514;EVM0015441
GO:0044763	single-organism cellular process	0.874	biological_process	EVM0020514;EVM0002997;EVM0011829;EVM0004395;EVM0015281;EVM0019421;EVM0020411;EVM0005619;EVM0023007;EVM0015655;EVM0021293;EVM0008348;EVM0004060;EVM0021211;EVM0024461;EVM0019286;EVM0005725;EVM0005729;EVM0003460;EVM0002152;EVM0006603;EVM0016771;EVM0005615;EVM0008480;EVM0012305;EVM0015441;EVM0003283;EVM0009160;EVM0014316;EVM0010674;EVM0002135;EVM0003082;EVM0007729;EVM0001335;EVM0008012;EVM0022812;EVM…
GO:0017038	protein import	0.874	biological_process	EVM0010674;EVM0007729;EVM0008012;EVM0009560
GO:0009116	nucleoside metabolic process	0.874	biological_process	EVM0020514;EVM0015281;EVM0019286;EVM0005725;EVM0015441;EVM0003283;EVM0010674;EVM0007729;EVM0019432
GO:0009119	ribonucleoside metabolic process	0.874	biological_process	EVM0020514;EVM0015281;EVM0019286;EVM0005725;EVM0015441;EVM0003283;EVM0010674;EVM0007729;EVM0019432
GO:0006839	mitochondrial transport	0.874	biological_process	EVM0005725;EVM0010674;EVM0007729
GO:0036094	small molecule binding	0.88	molecular_function	EVM0019286;EVM0021498;EVM0020785;EVM0009160;EVM0010674;EVM0007729;EVM0009637;EVM0005161;EVM0003561
GO:0016209	antioxidant activity	0.88	molecular_function	EVM0002152;EVM0022009;EVM0003457
GO:0006612	protein targeting to membrane	0.88	biological_process	EVM0010674;EVM0008012;EVM0009560
GO:0009651	response to salt stress	0.89	biological_process	EVM0004395;EVM0023007;EVM0011755;EVM0022547;EVM0003121;EVM0007729;EVM0003138;EVM0017015;EVM0006448;EVM0000941;EVM0019225;EVM0006954
GO:0009607	response to biotic stimulus	0.898	biological_process	EVM0004395;EVM0015281;EVM0008348;EVM0004060;EVM0021211;EVM0021498;EVM0020785;EVM0003283;EVM0010346;EVM0007916;EVM0006282;EVM0002121;EVM0014754;EVM0005161;EVM0019432;EVM0017881;EVM0016833
GO:0003918	DNA topoisomerase type II (ATP-hydrolyzing) activity	0.9	molecular_function	EVM0020514;EVM0015441
GO:0061505	DNA topoisomerase II activity	0.9	molecular_function	EVM0020514;EVM0015441
GO:0000326	protein storage vacuole	0.9	cellular_component	EVM0019421;EVM0001335
GO:0000786	nucleosome	0.9	cellular_component	EVM0011000;EVM0014457
GO:0043531	ADP binding	0.9	molecular_function	EVM0019286;EVM0005161
GO:0010286	heat acclimation	0.92	biological_process	EVM0005619;EVM0019286;EVM0002943
GO:0001932	regulation of protein phosphorylation	0.924	biological_process	EVM0015281;EVM0003283;EVM0007729;EVM0019432
GO:0043168	anion binding	0.924	molecular_function	EVM0019286;EVM0021498;EVM0020785;EVM0009160;EVM0010674;EVM0007729;EVM0009637;EVM0005161;EVM0003561
GO:0010558	negative regulation of macromolecule biosynthetic process	0.924	biological_process	EVM0009694;EVM0004395;EVM0012305;EVM0010674;EVM0023121;EVM0019225;EVM0004448
GO:2000113	negative regulation of cellular macromolecule biosynthetic process	0.924	biological_process	EVM0009694;EVM0004395;EVM0012305;EVM0010674;EVM0023121;EVM0019225;EVM0004448
GO:0040008	regulation of growth	0.926	biological_process	EVM0002997;EVM0004395;EVM0015281;EVM0012305;EVM0003283;EVM0017015
GO:0009941	chloroplast envelope	0.93	cellular_component	EVM0019421;EVM0023007;EVM0002152;EVM0008480;EVM0023697;EVM0000371;EVM0001335;EVM0008012;EVM0002121;EVM0012360;EVM0011091;EVM0017589;EVM0005161;EVM0011317;EVM0003457;EVM0017312
GO:0043170	macromolecule metabolic process	0.93	biological_process	EVM0004312;EVM0020514;EVM0011829;EVM0021572;EVM0015281;EVM0018866;EVM0021211;EVM0019286;EVM0021498;EVM0005725;EVM0020785;EVM0003460;EVM0005615;EVM0013093;EVM0012305;EVM0015441;EVM0003283;EVM0016615;EVM0010674;EVM0003082;EVM0007729;EVM0022812;EVM0021781;EVM0003138;EVM0012360;EVM0006448;EVM0019244;EVM0006954;EVM0019432;EVM0000411
GO:0045935	positive regulation of nucleobase-containing compound metabolic process	0.93	biological_process	EVM0015281;EVM0005619;EVM0005725;EVM0016772;EVM0003283;EVM0012502;EVM0019432
GO:0034655	nucleobase-containing compound catabolic process	0.93	biological_process	EVM0020514;EVM0015281;EVM0019286;EVM0005725;EVM0015441;EVM0003283;EVM0010674;EVM0007729;EVM0019432
GO:0001101	response to acid chemical	0.93	biological_process	EVM0006657;EVM0004395;EVM0020411;EVM0013457;EVM0002152;EVM0006603;EVM0011755;EVM0012305;EVM0009160;EVM0003121;EVM0023199;EVM0012502;EVM0017015;EVM0014856;EVM0000941;EVM0019225;EVM0005161;EVM0003457;EVM0003561
GO:0044238	primary metabolic process	0.932	biological_process	EVM0004312;EVM0020514;EVM0011829;EVM0021572;EVM0004395;EVM0015281;EVM0018866;EVM0015655;EVM0008946;EVM0021293;EVM0021211;EVM0024461;EVM0019286;EVM0021498;EVM0005725;EVM0020785;EVM0005729;EVM0003460;EVM0016771;EVM0005615;EVM0013093;EVM0012305;EVM0015441;EVM0003283;EVM0014316;EVM0016615;EVM0010674;EVM0002135;EVM0003082;EVM0007729;EVM0022812;EVM0021781;EVM0003138;EVM0012360;EVM0006448;EVM0015469;EVM…
GO:0010604	positive regulation of macromolecule metabolic process	0.932	biological_process	EVM0015281;EVM0005619;EVM0005725;EVM0016772;EVM0003283;EVM0007729;EVM0012502;EVM0019432
GO:0006493	protein O-linked glycosylation	0.932	biological_process	EVM0003082;EVM0019244
GO:0003916	DNA topoisomerase activity	0.932	molecular_function	EVM0020514;EVM0015441
GO:0009970	cellular response to sulfate starvation	0.932	biological_process	EVM0002152;EVM0003457
GO:0031975	envelope	0.94	cellular_component	EVM0017865;EVM0004395;EVM0019421;EVM0023007;EVM0008946;EVM0019286;EVM0005729;EVM0002152;EVM0008480;EVM0023697;EVM0000371;EVM0001335;EVM0008012;EVM0002121;EVM0012360;EVM0011091;EVM0017589;EVM0005161;EVM0011317;EVM0003457;EVM0017312
GO:0031967	organelle envelope	0.94	cellular_component	EVM0017865;EVM0004395;EVM0019421;EVM0023007;EVM0008946;EVM0019286;EVM0005729;EVM0002152;EVM0008480;EVM0023697;EVM0000371;EVM0001335;EVM0008012;EVM0002121;EVM0012360;EVM0011091;EVM0017589;EVM0005161;EVM0011317;EVM0003457;EVM0017312
GO:0009892	negative regulation of metabolic process	0.946	biological_process	EVM0009694;EVM0004395;EVM0015281;EVM0012305;EVM0003283;EVM0010674;EVM0007729;EVM0023121;EVM0019225;EVM0004448
GO:0051172	negative regulation of nitrogen compound metabolic process	0.946	biological_process	EVM0009694;EVM0004395;EVM0012305;EVM0010674;EVM0023121;EVM0019225;EVM0004448
GO:0051336	regulation of hydrolase activity	0.946	biological_process	EVM0015281;EVM0003283;EVM0019432
GO:0044743	protein transmembrane import into intracellular organelle	0.946	biological_process	EVM0007729;EVM0008012;EVM0009560
GO:0032270	positive regulation of cellular protein metabolic process	0.95	biological_process	EVM0015281;EVM0003283;EVM0007729;EVM0019432
GO:0051338	regulation of transferase activity	0.95	biological_process	EVM0015281;EVM0003283;EVM0007729;EVM0019432
GO:0009526	plastid envelope	0.95	cellular_component	EVM0019421;EVM0023007;EVM0002152;EVM0008480;EVM0023697;EVM0000371;EVM0001335;EVM0008012;EVM0002121;EVM0012360;EVM0011091;EVM0017589;EVM0005161;EVM0011317;EVM0003457;EVM0017312
GO:0045892	negative regulation of transcription, DNA-templated	0.95	biological_process	EVM0009694;EVM0004395;EVM0012305;EVM0010674;EVM0019225;EVM0004448
GO:1903507	negative regulation of nucleic acid-templated transcription	0.95	biological_process	EVM0009694;EVM0004395;EVM0012305;EVM0010674;EVM0019225;EVM0004448
GO:1902679	negative regulation of RNA biosynthetic process	0.95	biological_process	EVM0009694;EVM0004395;EVM0012305;EVM0010674;EVM0019225;EVM0004448
GO:0051253	negative regulation of RNA metabolic process	0.95	biological_process	EVM0009694;EVM0004395;EVM0012305;EVM0010674;EVM0019225;EVM0004448
GO:0044237	cellular metabolic process	0.95	biological_process	EVM0004312;EVM0020514;EVM0017865;EVM0011829;EVM0021572;EVM0004395;EVM0015281;EVM0018866;EVM0015655;EVM0002457;EVM0008946;EVM0021293;EVM0021211;EVM0024461;EVM0019286;EVM0021498;EVM0005725;EVM0020785;EVM0005729;EVM0003460;EVM0002152;EVM0016771;EVM0005615;EVM0013093;EVM0012305;EVM0015441;EVM0003283;EVM0014316;EVM0016615;EVM0010674;EVM0002135;EVM0003082;EVM0007729;EVM0022812;EVM0021781;EVM0003138;EVM…
GO:0016032	viral process	0.95	biological_process	EVM0004395;EVM0004060;EVM0021498;EVM0020785;EVM0014754
GO:0051247	positive regulation of protein metabolic process	0.95	biological_process	EVM0015281;EVM0003283;EVM0007729;EVM0019432
GO:0098805	whole membrane	0.95	cellular_component	EVM0014947;EVM0019421;EVM0008946;EVM0021211;EVM0021498;EVM0020785;EVM0005729;EVM0022547;EVM0010674;EVM0001335;EVM0017015;EVM0014754;EVM0022936;EVM0008448;EVM0024139;EVM0017589;EVM0013704;EVM0001262
GO:0042325	regulation of phosphorylation	0.95	biological_process	EVM0015281;EVM0003283;EVM0007729;EVM0019432
GO:0016790	thiolester hydrolase activity	0.952	molecular_function	EVM0015655;EVM0001654
GO:0042744	hydrogen peroxide catabolic process	0.952	biological_process	EVM0002152;EVM0003457
GO:1901265	nucleoside phosphate binding	0.968	molecular_function	EVM0019286;EVM0021498;EVM0020785;EVM0010674;EVM0007729;EVM0009637;EVM0005161
GO:0000166	nucleotide binding	0.968	molecular_function	EVM0019286;EVM0021498;EVM0020785;EVM0010674;EVM0007729;EVM0009637;EVM0005161
GO:0031327	negative regulation of cellular biosynthetic process	0.968	biological_process	EVM0009694;EVM0004395;EVM0012305;EVM0010674;EVM0023121;EVM0019225;EVM0004448
GO:0065003	macromolecular complex assembly	0.972	biological_process	EVM0017865;EVM0005725;EVM0007729;EVM0003138;EVM0006448;EVM0006954
GO:0042887	amide transmembrane transporter activity	0.974	molecular_function	EVM0019421;EVM0001335;EVM0013704
GO:0043161	proteasome-mediated ubiquitin-dependent protein catabolic process	0.974	biological_process	EVM0015281;EVM0003283;EVM0019432
GO:0000988	transcription factor activity, protein binding	0.974	molecular_function	EVM0004395;EVM0004060;EVM0012502
GO:0015267	channel activity	0.978	molecular_function	EVM0019421;EVM0020411;EVM0001335;EVM0013704
GO:0022838	substrate-specific channel activity	0.978	molecular_function	EVM0019421;EVM0020411;EVM0001335;EVM0013704
GO:0022803	passive transmembrane transporter activity	0.978	molecular_function	EVM0019421;EVM0020411;EVM0001335;EVM0013704
GO:0019439	aromatic compound catabolic process	0.98	biological_process	EVM0020514;EVM0015281;EVM0019286;EVM0005725;EVM0015441;EVM0003283;EVM0010674;EVM0007729;EVM0019432
GO:0031324	negative regulation of cellular metabolic process	0.98	biological_process	EVM0009694;EVM0004395;EVM0012305;EVM0010674;EVM0007729;EVM0023121;EVM0019225;EVM0004448
GO:0044446	intracellular organelle part	0.98	cellular_component	EVM0014947;EVM0017865;EVM0011829;EVM0004395;EVM0015281;EVM0019120;EVM0019421;EVM0018866;EVM0023007;EVM0008946;EVM0021211;EVM0019286;EVM0021498;EVM0020785;EVM0005729;EVM0002152;EVM0016576;EVM0016771;EVM0008480;EVM0023697;EVM0022547;EVM0003283;EVM0000371;EVM0004603;EVM0007916;EVM0010674;EVM0003082;EVM0007729;EVM0001335;EVM0004356;EVM0008012;EVM0022812;EVM0012502;EVM0011000;EVM0017015;EVM0002121;EVM…
GO:0051235	maintenance of location	0.98	biological_process	EVM0015281;EVM0003283;EVM0008448
GO:0018208	peptidyl-proline modification	0.98	biological_process	EVM0018866;EVM0021211;EVM0003082
GO:0044422	organelle part	0.98	cellular_component	EVM0014947;EVM0017865;EVM0011829;EVM0004395;EVM0015281;EVM0019120;EVM0019421;EVM0018866;EVM0023007;EVM0008946;EVM0021211;EVM0019286;EVM0021498;EVM0020785;EVM0005729;EVM0002152;EVM0016576;EVM0016771;EVM0008480;EVM0023697;EVM0022547;EVM0003283;EVM0000371;EVM0004603;EVM0007916;EVM0010674;EVM0003082;EVM0007729;EVM0001335;EVM0004356;EVM0008012;EVM0022812;EVM0012502;EVM0011000;EVM0017015;EVM0002121;EVM…
GO:0033993	response to lipid	0.98	biological_process	EVM0006657;EVM0002997;EVM0004395;EVM0005950;EVM0002152;EVM0009160;EVM0003121;EVM0007729;EVM0012502;EVM0014856;EVM0000941;EVM0019225;EVM0003457;EVM0003561
GO:0009890	negative regulation of biosynthetic process	0.98	biological_process	EVM0009694;EVM0004395;EVM0012305;EVM0010674;EVM0023121;EVM0019225;EVM0004448
GO:0009414	response to water deprivation	0.98	biological_process	EVM0020411;EVM0013457;EVM0011755;EVM0012305;EVM0023199;EVM0012502;EVM0017015;EVM0000941
GO:0019915	lipid storage	0.98	biological_process	EVM0015281;EVM0003283
GO:0002684	positive regulation of immune system process	0.99	biological_process	EVM0010346;EVM0007916;EVM0007729
GO:0010498	proteasomal protein catabolic process	0.99	biological_process	EVM0015281;EVM0003283;EVM0019432
GO:0072594	establishment of protein localization to organelle	0.99	biological_process	EVM0005725;EVM0010674;EVM0007729;EVM0008012;EVM0009560
GO:0046700	heterocycle catabolic process	0.99	biological_process	EVM0020514;EVM0015281;EVM0019286;EVM0005725;EVM0015441;EVM0003283;EVM0010674;EVM0007729;EVM0019432
GO:0042803	protein homodimerization activity	0.99	molecular_function	EVM0004395;EVM0009160;EVM0007729;EVM0003561
GO:0050793	regulation of developmental process	0.99	biological_process	EVM0006657;EVM0004395;EVM0015281;EVM0012305;EVM0003283;EVM0007729;EVM0017015;EVM0014754;EVM0009560;EVM0004448;EVM0019432
GO:1902582	single-organism intracellular transport	0.99	biological_process	EVM0010674;EVM0007729;EVM0008012;EVM0009560
GO:0002119	nematode larval development	0.99	biological_process	EVM0004395;EVM0015281;EVM0003283;EVM0007729
GO:0009415	response to water	0.99	biological_process	EVM0020411;EVM0013457;EVM0011755;EVM0012305;EVM0023199;EVM0012502;EVM0017015;EVM0000941
GO:0048583	regulation of response to stimulus	0.99	biological_process	EVM0006657;EVM0015281;EVM0021293;EVM0003283;EVM0010346;EVM0007916;EVM0007729;EVM0019244;EVM0019432;EVM0017312
GO:0048519	negative regulation of biological process	0.99	biological_process	EVM0002997;EVM0009694;EVM0004395;EVM0015281;EVM0012305;EVM0003283;EVM0010674;EVM0007729;EVM0023121;EVM0014754;EVM0019244;EVM0019225;EVM0004448;EVM0019432
GO:0006915	apoptotic process	0.99	biological_process	EVM0015281;EVM0003283;EVM0007729
GO:1901361	organic cyclic compound catabolic process	0.992	biological_process	EVM0020514;EVM0015281;EVM0019286;EVM0005725;EVM0015441;EVM0003283;EVM0010674;EVM0007729;EVM0019432
GO:0051239	regulation of multicellular organismal process	0.992	biological_process	EVM0006657;EVM0004395;EVM0015281;EVM0012305;EVM0003283;EVM0007729;EVM0017015;EVM0014754;EVM0004448;EVM0019432
GO:0009737	response to abscisic acid	0.992	biological_process	EVM0006657;EVM0004395;EVM0002152;EVM0009160;EVM0003121;EVM0012502;EVM0014856;EVM0000941;EVM0019225;EVM0003457;EVM0003561
GO:1902580	single-organism cellular localization	0.992	biological_process	EVM0010674;EVM0007729;EVM0008012;EVM0009560
GO:0002164	larval development	0.992	biological_process	EVM0004395;EVM0015281;EVM0003283;EVM0007729
GO:0009968	negative regulation of signal transduction	0.992	biological_process	EVM0015281;EVM0003283;EVM0019244;EVM0019432
GO:0023057	negative regulation of signaling	0.992	biological_process	EVM0015281;EVM0003283;EVM0019244;EVM0019432
GO:0043067	regulation of programmed cell death	0.992	biological_process	EVM0015281;EVM0003283;EVM0007729;EVM0019432
GO:0010648	negative regulation of cell communication	0.992	biological_process	EVM0015281;EVM0003283;EVM0019244;EVM0019432
GO:0043229	intracellular organelle	0.992	cellular_component	EVM0006657;EVM0001640;EVM0013186;EVM0020514;EVM0014947;EVM0017865;EVM0011829;EVM0009694;EVM0004395;EVM0022630;EVM0015281;EVM0019120;EVM0019421;EVM0003764;EVM0020411;EVM0018866;EVM0004828;EVM0005619;EVM0023007;EVM0010333;EVM0015655;EVM0008946;EVM0006179;EVM0008348;EVM0004060;EVM0015947;EVM0005950;EVM0009602;EVM0021211;EVM0024461;EVM0012091;EVM0019286;EVM0021498;EVM0005725;EVM0020785;EVM0005729;EVM…
GO:1901565	organonitrogen compound catabolic process	0.992	biological_process	EVM0020514;EVM0015281;EVM0019286;EVM0005725;EVM0015441;EVM0003283;EVM0010674;EVM0007729;EVM0019432
GO:0045934	negative regulation of nucleobase-containing compound metabolic process	0.992	biological_process	EVM0009694;EVM0004395;EVM0012305;EVM0010674;EVM0019225;EVM0004448
GO:1901657	glycosyl compound metabolic process	0.992	biological_process	EVM0020514;EVM0015281;EVM0019286;EVM0005725;EVM0015441;EVM0003283;EVM0010674;EVM0007729;EVM0019432
GO:0044036	cell wall macromolecule metabolic process	0.992	biological_process	EVM0011829;EVM0003082;EVM0022812
GO:0030308	negative regulation of cell growth	0.992	biological_process	EVM0004395;EVM0012305
GO:0044815	DNA packaging complex	0.992	cellular_component	EVM0011000;EVM0014457
GO:0006605	protein targeting	0.992	biological_process	EVM0005725;EVM0010674;EVM0007729;EVM0008012;EVM0009560
GO:0016482	cytosolic transport	0.992	biological_process	EVM0005725;EVM0003460;EVM0010674;EVM0007729;EVM0008012;EVM0009560
GO:0009505	plant-type cell wall	0.992	cellular_component	EVM0001485;EVM0002997;EVM0005950;EVM0021211;EVM0001811;EVM0013798;EVM0009258
GO:0098588	bounding membrane of organelle	0.992	cellular_component	EVM0014947;EVM0011829;EVM0019421;EVM0008946;EVM0021211;EVM0021498;EVM0020785;EVM0005729;EVM0022547;EVM0010674;EVM0003082;EVM0001335;EVM0004356;EVM0017015;EVM0014754;EVM0022936;EVM0008448;EVM0024139;EVM0017589;EVM0013704;EVM0001262
GO:0032268	regulation of cellular protein metabolic process	0.992	biological_process	EVM0015281;EVM0003283;EVM0007729;EVM0023121;EVM0004448;EVM0019432
GO:0033365	protein localization to organelle	0.992	biological_process	EVM0005725;EVM0010674;EVM0007729;EVM0008012;EVM0009560
GO:0043231	intracellular membrane-bounded organelle	0.992	cellular_component	EVM0006657;EVM0001640;EVM0013186;EVM0020514;EVM0014947;EVM0017865;EVM0011829;EVM0009694;EVM0004395;EVM0022630;EVM0015281;EVM0019120;EVM0019421;EVM0003764;EVM0020411;EVM0018866;EVM0004828;EVM0005619;EVM0023007;EVM0010333;EVM0015655;EVM0008946;EVM0006179;EVM0008348;EVM0004060;EVM0015947;EVM0005950;EVM0009602;EVM0021211;EVM0024461;EVM0012091;EVM0019286;EVM0021498;EVM0005725;EVM0020785;EVM0005729;EVM…
GO:0043227	membrane-bounded organelle	0.992	cellular_component	EVM0006657;EVM0001640;EVM0013186;EVM0020514;EVM0014947;EVM0017865;EVM0011829;EVM0009694;EVM0004395;EVM0022630;EVM0015281;EVM0019120;EVM0019421;EVM0003764;EVM0020411;EVM0018866;EVM0004828;EVM0005619;EVM0023007;EVM0010333;EVM0015655;EVM0008946;EVM0006179;EVM0008348;EVM0004060;EVM0015947;EVM0005950;EVM0009602;EVM0021211;EVM0024461;EVM0012091;EVM0019286;EVM0021498;EVM0005725;EVM0020785;EVM0005729;EVM…
GO:0009719	response to endogenous stimulus	0.992	biological_process	EVM0006657;EVM0002997;EVM0009694;EVM0004395;EVM0022630;EVM0005619;EVM0021293;EVM0004060;EVM0005950;EVM0002152;EVM0009160;EVM0003121;EVM0007729;EVM0012502;EVM0015454;EVM0014856;EVM0000941;EVM0019225;EVM0005161;EVM0003457;EVM0003561
GO:0050790	regulation of catalytic activity	0.992	biological_process	EVM0015281;EVM0003283;EVM0007729;EVM0005161;EVM0019432;EVM0017312
GO:0043226	organelle	0.992	cellular_component	EVM0006657;EVM0001640;EVM0013186;EVM0020514;EVM0014947;EVM0017865;EVM0011829;EVM0009694;EVM0004395;EVM0022630;EVM0015281;EVM0019120;EVM0019421;EVM0003764;EVM0020411;EVM0018866;EVM0004828;EVM0005619;EVM0023007;EVM0010333;EVM0015655;EVM0008946;EVM0006179;EVM0008348;EVM0004060;EVM0015947;EVM0005950;EVM0009602;EVM0021211;EVM0024461;EVM0012091;EVM0019286;EVM0021498;EVM0005725;EVM0020785;EVM0005729;EVM…
GO:0045471	response to ethanol	0.994	biological_process	EVM0013186;EVM0017982
GO:0007154	cell communication	0.998	biological_process	EVM0002997;EVM0015281;EVM0021293;EVM0003460;EVM0002152;EVM0012305;EVM0003283;EVM0009160;EVM0007729;EVM0012502;EVM0000966;EVM0019244;EVM0000941;EVM0003457;EVM0019432;EVM0003561
GO:0005975	carbohydrate metabolic process	0.998	biological_process	EVM0011829;EVM0004395;EVM0008946;EVM0019286;EVM0014316;EVM0003082;EVM0022812;EVM0019244
GO:0010608	posttranscriptional regulation of gene expression	0.998	biological_process	EVM0015281;EVM0003283;EVM0002943;EVM0023121;EVM0004448
GO:0031090	organelle membrane	0.998	cellular_component	EVM0014947;EVM0017865;EVM0011829;EVM0015281;EVM0019421;EVM0008946;EVM0021211;EVM0021498;EVM0020785;EVM0005729;EVM0008480;EVM0023697;EVM0022547;EVM0003283;EVM0010674;EVM0003082;EVM0001335;EVM0004356;EVM0017015;EVM0002121;EVM0014754;EVM0022936;EVM0015469;EVM0008448;EVM0024139;EVM0017589;EVM0013704;EVM0019432;EVM0001262
GO:0046983	protein dimerization activity	0.998	molecular_function	EVM0004395;EVM0009160;EVM0007729;EVM0003561
GO:0034614	cellular response to reactive oxygen species	0.998	biological_process	EVM0019286;EVM0002152;EVM0000941;EVM0003457
GO:0009514	glyoxysome	0.998	cellular_component	EVM0002152;EVM0003457
GO:0010171	body morphogenesis	0.998	biological_process	EVM0015281;EVM0003283
GO:0031984	organelle subcompartment	0.998	cellular_component	EVM0011829;EVM0019120;EVM0018866;EVM0021211;EVM0003082;EVM0004356;EVM0008012;EVM0022812;EVM0002121;EVM0023121;EVM0018530;EVM0007336;EVM0009560;EVM0017589;EVM0005161;EVM0017312
GO:0016020	membrane	0.998	cellular_component	EVM0001485;EVM0014947;EVM0017865;EVM0011829;EVM0004395;EVM0015281;EVM0009505;EVM0019421;EVM0020411;EVM0018866;EVM0002002;EVM0004116;EVM0008946;EVM0008348;EVM0004060;EVM0013457;EVM0021211;EVM0024461;EVM0013730;EVM0021498;EVM0005725;EVM0020785;EVM0005729;EVM0019328;EVM0001811;EVM0012336;EVM0021636;EVM0002152;EVM0022647;EVM0006603;EVM0016772;EVM0016779;EVM0008480;EVM0024476;EVM0023697;EVM0022547;EVM…
GO:0051246	regulation of protein metabolic process	0.998	biological_process	EVM0015281;EVM0003283;EVM0007729;EVM0023121;EVM0004448;EVM0019432
GO:0042802	identical protein binding	0.998	molecular_function	EVM0004395;EVM0009160;EVM0007729;EVM0003561
GO:0048532	anatomical structure arrangement	0.998	biological_process	EVM0015281;EVM0003283;EVM0019432
GO:0070301	cellular response to hydrogen peroxide	0.998	biological_process	EVM0002152;EVM0000941;EVM0003457
GO:0032889	regulation of vacuole fusion, non-autophagic	0.998	biological_process	EVM0004395
GO:0047184	1-acylglycerophosphocholine O-acyltransferase activity	0.998	molecular_function	EVM0024461
GO:0042246	tissue regeneration	0.998	biological_process	EVM0004395
GO:0043204	perikaryon	0.998	cellular_component	EVM0004395
GO:0000015	phosphopyruvate hydratase complex	0.998	cellular_component	EVM0004395
GO:1901033	positive regulation of response to reactive oxygen species	0.998	biological_process	EVM0017312
GO:0005844	polysome	0.998	cellular_component	EVM0010674
GO:0000974	Prp19 complex	0.998	cellular_component	EVM0010674
GO:0010240	plastid pyruvate dehydrogenase complex	0.998	cellular_component	EVM0011091
GO:0031672	A band	0.998	cellular_component	EVM0004395
GO:0031430	M band	0.998	cellular_component	EVM0004395
GO:1901668	regulation of superoxide dismutase activity	0.998	biological_process	EVM0017312
GO:0008113	peptide-methionine (S)-S-oxide reductase activity	0.998	molecular_function	EVM0023007
GO:0000492	box C/D snoRNP assembly	0.998	biological_process	EVM0005725
GO:0004635	phosphoribosyl-AMP cyclohydrolase activity	0.998	molecular_function	EVM0016771
GO:0004636	phosphoribosyl-ATP diphosphatase activity	0.998	molecular_function	EVM0016771
GO:0031492	nucleosomal DNA binding	0.998	molecular_function	EVM0023199
GO:0001917	photoreceptor inner segment	0.998	cellular_component	EVM0004395
GO:0043403	skeletal muscle tissue regeneration	0.998	biological_process	EVM0004395
GO:1900409	positive regulation of cellular response to oxidative stress	0.998	biological_process	EVM0017312
GO:0004416	hydroxyacylglutathione hydrolase activity	0.998	molecular_function	EVM0001654
GO:0004038	allantoinase activity	0.998	molecular_function	EVM0000966
GO:1902884	positive regulation of response to oxidative stress	0.998	biological_process	EVM0017312
GO:0009277	fungal-type cell wall	0.998	cellular_component	EVM0010674
GO:0032355	response to estradiol	0.998	biological_process	EVM0004395
GO:0052636	arabinosyltransferase activity	0.998	molecular_function	EVM0022812
GO:1904833	positive regulation of removal of superoxide radicals	0.998	biological_process	EVM0017312
GO:1901671	positive regulation of superoxide dismutase activity	0.998	biological_process	EVM0017312
GO:2000026	regulation of multicellular organismal development	1	biological_process	EVM0006657;EVM0015281;EVM0012305;EVM0003283;EVM0007729;EVM0017015;EVM0014754;EVM0004448;EVM0019432
GO:0005615	extracellular space	1	cellular_component	EVM0015281;EVM0021211;EVM0003283
GO:0040010	positive regulation of growth rate	1	biological_process	EVM0004395;EVM0015281;EVM0003283
GO:0044764	multi-organism cellular process	1	biological_process	EVM0004395;EVM0004060;EVM0021498;EVM0020785;EVM0014754
GO:0035821	modification of morphology or physiology of other organism	1	biological_process	EVM0010346;EVM0007916
GO:0010427	abscisic acid binding	1	molecular_function	EVM0009160;EVM0003561
GO:0044003	modification by symbiont of host morphology or physiology	1	biological_process	EVM0010346;EVM0007916
GO:0051817	modification of morphology or physiology of other organism involved in symbiotic interaction	1	biological_process	EVM0010346;EVM0007916
GO:0098791	Golgi subcompartment	1	cellular_component	EVM0011829;EVM0019120;EVM0018866;EVM0021211;EVM0003082;EVM0004356;EVM0022812;EVM0007336
GO:0043413	macromolecule glycosylation	1	biological_process	EVM0003082;EVM0022812;EVM0019244
GO:0006486	protein glycosylation	1	biological_process	EVM0003082;EVM0022812;EVM0019244
GO:0040009	regulation of growth rate	1	biological_process	EVM0004395;EVM0015281;EVM0003283
GO:0009966	regulation of signal transduction	1	biological_process	EVM0015281;EVM0021293;EVM0003283;EVM0007729;EVM0019244;EVM0019432
GO:0009100	glycoprotein metabolic process	1	biological_process	EVM0003082;EVM0022812;EVM0019244
GO:0009101	glycoprotein biosynthetic process	1	biological_process	EVM0003082;EVM0022812;EVM0019244
GO:0019220	regulation of phosphate metabolic process	1	biological_process	EVM0015281;EVM0003283;EVM0007729;EVM0019432
GO:0051174	regulation of phosphorus metabolic process	1	biological_process	EVM0015281;EVM0003283;EVM0007729;EVM0019432
GO:0023051	regulation of signaling	1	biological_process	EVM0015281;EVM0021293;EVM0003283;EVM0007729;EVM0019244;EVM0019432
GO:0070085	glycosylation	1	biological_process	EVM0003082;EVM0022812;EVM0019244
GO:0008152	metabolic process	1	biological_process	EVM0001485;EVM0004312;EVM0020514;EVM0017865;EVM0011829;EVM0021572;EVM0015976;EVM0004395;EVM0015281;EVM0018866;EVM0023007;EVM0015655;EVM0002457;EVM0008946;EVM0021293;EVM0021211;EVM0024461;EVM0019286;EVM0021498;EVM0005725;EVM0020785;EVM0005729;EVM0003460;EVM0002152;EVM0016771;EVM0005615;EVM0013093;EVM0012305;EVM0015441;EVM0003283;EVM0009306;EVM0014316;EVM0016615;EVM0010674;EVM0002943;EVM0002135;EVM…
GO:0044723	single-organism carbohydrate metabolic process	1	biological_process	EVM0011829;EVM0004395;EVM0019286;EVM0014316;EVM0003082;EVM0022812;EVM0019244
GO:0005802	trans-Golgi network	1	cellular_component	EVM0011829;EVM0019120;EVM0021211;EVM0003082;EVM0004356;EVM0022812;EVM0007336
GO:0016836	hydro-lyase activity	1	molecular_function	EVM0017865;EVM0004395;EVM0021293
GO:0010941	regulation of cell death	1	biological_process	EVM0015281;EVM0003283;EVM0007729;EVM0019432
GO:0003713	transcription coactivator activity	1	molecular_function	EVM0004060;EVM0012502
GO:0044297	cell body	1	cellular_component	EVM0004395;EVM0007729
GO:0043025	neuronal cell body	1	cellular_component	EVM0004395;EVM0007729
GO:0031399	regulation of protein modification process	1	biological_process	EVM0015281;EVM0003283;EVM0007729;EVM0019432
GO:0045088	regulation of innate immune response	1	biological_process	EVM0010346;EVM0007916;EVM0007729
GO:0007005	mitochondrion organization	1	biological_process	EVM0005725;EVM0010674;EVM0007729
GO:0031301	integral component of organelle membrane	1	cellular_component	EVM0015281;EVM0003283;EVM0019432
GO:0010646	regulation of cell communication	1	biological_process	EVM0015281;EVM0021293;EVM0003283;EVM0007729;EVM0019244;EVM0019432
GO:0071840	cellular component organization or biogenesis	1	biological_process	EVM0020514;EVM0017865;EVM0011829;EVM0015281;EVM0021211;EVM0005725;EVM0003460;EVM0012305;EVM0015441;EVM0003283;EVM0010674;EVM0003082;EVM0007729;EVM0022812;EVM0011000;EVM0003138;EVM0012360;EVM0006448;EVM0019244;EVM0009560;EVM0006954;EVM0019239;EVM0014457
GO:0065009	regulation of molecular function	1	biological_process	EVM0015281;EVM0003283;EVM0007729;EVM0005161;EVM0019432;EVM0017312
GO:0044281	small molecule metabolic process	1	biological_process	EVM0020514;EVM0004395;EVM0015281;EVM0015655;EVM0021293;EVM0021211;EVM0019286;EVM0005725;EVM0016771;EVM0015441;EVM0003283;EVM0014316;EVM0010674;EVM0007729;EVM0015469;EVM0011091;EVM0000941;EVM0016432;EVM0019432
GO:0009507	chloroplast	1	cellular_component	EVM0020514;EVM0004395;EVM0019421;EVM0020411;EVM0018866;EVM0023007;EVM0015655;EVM0006179;EVM0021211;EVM0002152;EVM0016771;EVM0008480;EVM0023697;EVM0015441;EVM0022547;EVM0000371;EVM0004603;EVM0003082;EVM0001335;EVM0008012;EVM0017015;EVM0016941;EVM0002121;EVM0023121;EVM0012360;EVM0014754;EVM0018530;EVM0011091;EVM0009560;EVM0016432;EVM0017589;EVM0015690;EVM0005161;EVM0001654;EVM0011317;EVM0003457;EVM…
GO:0016043	cellular component organization	1	biological_process	EVM0020514;EVM0017865;EVM0015281;EVM0021211;EVM0005725;EVM0003460;EVM0012305;EVM0015441;EVM0003283;EVM0010674;EVM0007729;EVM0022812;EVM0011000;EVM0003138;EVM0012360;EVM0006448;EVM0019244;EVM0009560;EVM0006954;EVM0019239;EVM0014457
GO:0009185	ribonucleoside diphosphate metabolic process	1	biological_process	EVM0004395;EVM0014316
GO:0046031	ADP metabolic process	1	biological_process	EVM0004395;EVM0014316
GO:0098590	plasma membrane region	1	cellular_component	EVM0004395;EVM0007729
GO:0006333	chromatin assembly or disassembly	1	biological_process	EVM0011000;EVM0014457
GO:0006096	glycolytic process	1	biological_process	EVM0004395;EVM0014316
GO:0009135	purine nucleoside diphosphate metabolic process	1	biological_process	EVM0004395;EVM0014316
GO:0009179	purine ribonucleoside diphosphate metabolic process	1	biological_process	EVM0004395;EVM0014316
GO:0006757	ATP generation from ADP	1	biological_process	EVM0004395;EVM0014316
GO:0043005	neuron projection	1	cellular_component	EVM0004395;EVM0007729
GO:0031300	intrinsic component of organelle membrane	1	cellular_component	EVM0015281;EVM0003283;EVM0019432
GO:0071822	protein complex subunit organization	1	biological_process	EVM0017865;EVM0005725;EVM0007729;EVM0003138;EVM0006448;EVM0006954
GO:0065007	biological regulation	1	biological_process	EVM0006657;EVM0002997;EVM0009694;EVM0004395;EVM0022630;EVM0015281;EVM0005619;EVM0020184;EVM0021293;EVM0004060;EVM0015947;EVM0005725;EVM0016772;EVM0011755;EVM0012305;EVM0022547;EVM0003283;EVM0009160;EVM0010346;EVM0016615;EVM0007916;EVM0003121;EVM0010674;EVM0002943;EVM0007729;EVM0012502;EVM0001167;EVM0017015;EVM0002121;EVM0023121;EVM0014856;EVM0014754;EVM0019244;EVM0008448;EVM0000941;EVM0009560;EVM…
GO:0005768	endosome	1	cellular_component	EVM0011829;EVM0019120;EVM0018866;EVM0021211;EVM0003082;EVM0004356;EVM0022812;EVM0007336
GO:0044699	single-organism process	1	biological_process	EVM0006657;EVM0020514;EVM0002997;EVM0011829;EVM0004395;EVM0015281;EVM0019421;EVM0020411;EVM0018866;EVM0005619;EVM0023007;EVM0015655;EVM0021293;EVM0008348;EVM0004060;EVM0013457;EVM0021211;EVM0024461;EVM0019286;EVM0005725;EVM0005729;EVM0003460;EVM0002152;EVM0006603;EVM0016771;EVM0011755;EVM0005615;EVM0008480;EVM0012305;EVM0015441;EVM0022547;EVM0003283;EVM0009160;EVM0014316;EVM0010674;EVM0002135;EVM…
GO:0009792	embryo development ending in birth or egg hatching	1	biological_process	EVM0004395;EVM0015281;EVM0003283;EVM0007729
GO:0044710	single-organism metabolic process	1	biological_process	EVM0020514;EVM0011829;EVM0004395;EVM0015281;EVM0023007;EVM0015655;EVM0021293;EVM0021211;EVM0024461;EVM0019286;EVM0005725;EVM0005729;EVM0002152;EVM0016771;EVM0015441;EVM0003283;EVM0014316;EVM0010674;EVM0002135;EVM0003082;EVM0007729;EVM0022812;EVM0013784;EVM0015469;EVM0019244;EVM0011091;EVM0000941;EVM0022009;EVM0016432;EVM0003457;EVM0019432
GO:0022857	transmembrane transporter activity	1	molecular_function	EVM0019421;EVM0020411;EVM0008348;EVM0006603;EVM0008480;EVM0001335;EVM0008448;EVM0024139;EVM0008373;EVM0013704;EVM0017881
GO:0006886	intracellular protein transport	1	biological_process	EVM0005725;EVM0010674;EVM0007729;EVM0008012;EVM0009560
GO:0050776	regulation of immune response	1	biological_process	EVM0010346;EVM0007916;EVM0007729
GO:0006633	fatty acid biosynthetic process	1	biological_process	EVM0015655;EVM0011091;EVM0016432
GO:0009132	nucleoside diphosphate metabolic process	1	biological_process	EVM0004395;EVM0014316
GO:0070592	cell wall polysaccharide biosynthetic process	1	biological_process	EVM0011829;EVM0022812
GO:0006165	nucleoside diphosphate phosphorylation	1	biological_process	EVM0004395;EVM0014316
GO:0071704	organic substance metabolic process	1	biological_process	EVM0004312;EVM0020514;EVM0011829;EVM0021572;EVM0004395;EVM0015281;EVM0018866;EVM0015655;EVM0008946;EVM0021293;EVM0021211;EVM0024461;EVM0019286;EVM0021498;EVM0005725;EVM0020785;EVM0005729;EVM0003460;EVM0016771;EVM0005615;EVM0013093;EVM0012305;EVM0015441;EVM0003283;EVM0014316;EVM0016615;EVM0010674;EVM0002135;EVM0003082;EVM0007729;EVM0022812;EVM0021781;EVM0003138;EVM0012360;EVM0006448;EVM0013784;EVM…
GO:0008610	lipid biosynthetic process	1	biological_process	EVM0015655;EVM0024461;EVM0005729;EVM0002135;EVM0015469;EVM0011091;EVM0016432
GO:0080134	regulation of response to stress	1	biological_process	EVM0006657;EVM0010346;EVM0007916;EVM0007729;EVM0017312
GO:0046863	ribulose-1,5-bisphosphate carboxylase/oxygenase activator activity	1	molecular_function	EVM0005161
GO:0016624	oxidoreductase activity, acting on the aldehyde or oxo group of donors, disulfide as acceptor	1	molecular_function	EVM0011091
GO:0031526	brush border membrane	1	cellular_component	EVM0007729
GO:0045466	R7 cell differentiation	1	biological_process	EVM0007729
GO:0050665	hydrogen peroxide biosynthetic process	1	biological_process	EVM0005729
GO:0001752	compound eye photoreceptor fate commitment	1	biological_process	EVM0007729
GO:2000121	regulation of removal of superoxide radicals	1	biological_process	EVM0017312
GO:0050870	positive regulation of T cell activation	1	biological_process	EVM0007729
GO:0006936	muscle contraction	1	biological_process	EVM0007729
GO:0006937	regulation of muscle contraction	1	biological_process	EVM0007729
GO:1903708	positive regulation of hemopoiesis	1	biological_process	EVM0007729
GO:0060491	regulation of cell projection assembly	1	biological_process	EVM0007729
GO:0018258	protein O-linked glycosylation via hydroxyproline	1	biological_process	EVM0003082
GO:0055117	regulation of cardiac muscle contraction	1	biological_process	EVM0007729
GO:0051353	positive regulation of oxidoreductase activity	1	biological_process	EVM0017312
GO:0033160	positive regulation of protein import into nucleus, translocation	1	biological_process	EVM0007729
GO:0006880	intracellular sequestering of iron ion	1	biological_process	EVM0008448
GO:1901031	regulation of response to reactive oxygen species	1	biological_process	EVM0017312
GO:0097577	sequestering of iron ion	1	biological_process	EVM0008448
GO:0008016	regulation of heart contraction	1	biological_process	EVM0007729
GO:0031253	cell projection membrane	1	cellular_component	EVM0007729
GO:0022410	circadian sleep/wake cycle process	1	biological_process	EVM0007729
GO:0008293	torso signaling pathway	1	biological_process	EVM0007729
GO:0005903	brush border	1	cellular_component	EVM0007729
GO:0060452	positive regulation of cardiac muscle contraction	1	biological_process	EVM0007729
GO:0048663	neuron fate commitment	1	biological_process	EVM0007729
GO:0015603	iron chelate transmembrane transporter activity	1	molecular_function	EVM0017881
GO:1904407	positive regulation of nitric oxide metabolic process	1	biological_process	EVM0007729
GO:0010384	cell wall proteoglycan metabolic process	1	biological_process	EVM0003082
GO:0098862	cluster of actin-based cell projections	1	cellular_component	EVM0007729
GO:0010405	arabinogalactan protein metabolic process	1	biological_process	EVM0003082
GO:0010404	cell wall hydroxyproline-rich glycoprotein metabolic process	1	biological_process	EVM0003082
GO:0030241	skeletal muscle myosin thick filament assembly	1	biological_process	EVM0007729
GO:0030240	skeletal muscle thin filament assembly	1	biological_process	EVM0007729
GO:0010658	striated muscle cell apoptotic process	1	biological_process	EVM0007729
GO:0010659	cardiac muscle cell apoptotic process	1	biological_process	EVM0007729
GO:0010657	muscle cell apoptotic process	1	biological_process	EVM0007729
GO:0019103	pyrimidine nucleotide binding	1	molecular_function	EVM0007729
GO:0005506	iron ion binding	1	molecular_function	EVM0001654
GO:0001884	pyrimidine nucleoside binding	1	molecular_function	EVM0007729
GO:0045785	positive regulation of cell adhesion	1	biological_process	EVM0007729
GO:0032206	positive regulation of telomere maintenance	1	biological_process	EVM0005725
GO:0050881	musculoskeletal movement	1	biological_process	EVM0007729
GO:0007465	R7 cell fate commitment	1	biological_process	EVM0007729
GO:1902745	positive regulation of lamellipodium organization	1	biological_process	EVM0007729
GO:1902743	regulation of lamellipodium organization	1	biological_process	EVM0007729
GO:0000491	small nucleolar ribonucleoprotein complex assembly	1	biological_process	EVM0005725
GO:0004496	mevalonate kinase activity	1	molecular_function	EVM0002457
GO:0051249	regulation of lymphocyte activation	1	biological_process	EVM0007729
GO:0032564	dATP binding	1	molecular_function	EVM0007729
GO:0045989	positive regulation of striated muscle contraction	1	biological_process	EVM0007729
GO:0048769	sarcomerogenesis	1	biological_process	EVM0007729
GO:0045187	regulation of circadian sleep/wake cycle, sleep	1	biological_process	EVM0007729
GO:0005705	polytene chromosome interband	1	cellular_component	EVM0007729
GO:0045040	protein import into mitochondrial outer membrane	1	biological_process	EVM0007729
GO:0006941	striated muscle contraction	1	biological_process	EVM0007729
GO:0006942	regulation of striated muscle contraction	1	biological_process	EVM0007729
GO:1903524	positive regulation of blood circulation	1	biological_process	EVM0007729
GO:1903522	regulation of blood circulation	1	biological_process	EVM0007729
GO:0031491	nucleosome binding	1	molecular_function	EVM0023199
GO:0050795	regulation of behavior	1	biological_process	EVM0007729
GO:0050863	regulation of T cell activation	1	biological_process	EVM0007729
GO:0045933	positive regulation of muscle contraction	1	biological_process	EVM0007729
GO:0002134	UTP binding	1	molecular_function	EVM0007729
GO:0002135	CTP binding	1	molecular_function	EVM0007729
GO:0032092	positive regulation of protein binding	1	biological_process	EVM0007729
GO:0097285	obsolete cell-type specific apoptotic process	1	biological_process	EVM0007729
GO:0090257	regulation of muscle system process	1	biological_process	EVM0007729
GO:0060338	regulation of type I interferon-mediated signaling pathway	1	biological_process	EVM0007729
GO:0010136	ureide catabolic process	1	biological_process	EVM0000966
GO:0010135	ureide metabolic process	1	biological_process	EVM0000966
GO:0001764	neuron migration	1	biological_process	EVM0007729
GO:1900407	regulation of cellular response to oxidative stress	1	biological_process	EVM0017312
GO:0050865	regulation of cell activation	1	biological_process	EVM0007729
GO:0050867	positive regulation of cell activation	1	biological_process	EVM0007729
GO:0048500	signal recognition particle	1	cellular_component	EVM0008012
GO:0044088	regulation of vacuole organization	1	biological_process	EVM0004395
GO:0033158	regulation of protein import into nucleus, translocation	1	biological_process	EVM0007729
GO:0045621	positive regulation of lymphocyte differentiation	1	biological_process	EVM0007729
GO:0002694	regulation of leukocyte activation	1	biological_process	EVM0007729
GO:0002696	positive regulation of leukocyte activation	1	biological_process	EVM0007729
GO:1903039	positive regulation of leukocyte cell-cell adhesion	1	biological_process	EVM0007729
GO:1903037	regulation of leukocyte cell-cell adhesion	1	biological_process	EVM0007729
GO:0046552	photoreceptor cell fate commitment	1	biological_process	EVM0007729
GO:0050999	regulation of nitric-oxide synthase activity	1	biological_process	EVM0007729
GO:1902882	regulation of response to oxidative stress	1	biological_process	EVM0017312
GO:0004738	pyruvate dehydrogenase activity	1	molecular_function	EVM0011091
GO:0004739	pyruvate dehydrogenase (acetyl-transferring) activity	1	molecular_function	EVM0011091
GO:0031674	I band	1	cellular_component	EVM0007729
GO:0003714	transcription corepressor activity	1	molecular_function	EVM0004395
GO:0051131	chaperone-mediated protein complex assembly	1	biological_process	EVM0007729
GO:0022407	regulation of cell-cell adhesion	1	biological_process	EVM0007729
GO:0022409	positive regulation of cell-cell adhesion	1	biological_process	EVM0007729
GO:0010591	regulation of lamellipodium assembly	1	biological_process	EVM0007729
GO:0010592	positive regulation of lamellipodium assembly	1	biological_process	EVM0007729
GO:0016297	acyl-[acyl-carrier-protein] hydrolase activity	1	molecular_function	EVM0015655
GO:0080085	signal recognition particle, chloroplast targeting	1	cellular_component	EVM0008012
GO:0040024	dauer larval development	1	biological_process	EVM0007729
GO:0030018	Z disc	1	cellular_component	EVM0007729
GO:0042706	eye photoreceptor cell fate commitment	1	biological_process	EVM0007729
GO:1903428	positive regulation of reactive oxygen species biosynthetic process	1	biological_process	EVM0007729
GO:1903426	regulation of reactive oxygen species biosynthetic process	1	biological_process	EVM0007729
GO:0045254	pyruvate dehydrogenase complex	1	cellular_component	EVM0011091
GO:0051980	iron-nicotianamine transmembrane transporter activity	1	molecular_function	EVM0017881
GO:1902107	positive regulation of leukocyte differentiation	1	biological_process	EVM0007729
GO:0045580	regulation of T cell differentiation	1	biological_process	EVM0007729
GO:0045582	positive regulation of T cell differentiation	1	biological_process	EVM0007729
GO:0045583	regulation of cytotoxic T cell differentiation	1	biological_process	EVM0007729
GO:0045585	positive regulation of cytotoxic T cell differentiation	1	biological_process	EVM0007729
GO:1904358	positive regulation of telomere maintenance via telomere lengthening	1	biological_process	EVM0005725
GO:0030235	nitric-oxide synthase regulator activity	1	molecular_function	EVM0007729
GO:0042745	circadian sleep/wake cycle	1	biological_process	EVM0007729
GO:0042749	regulation of circadian sleep/wake cycle	1	biological_process	EVM0007729
GO:0001890	placenta development	1	biological_process	EVM0007729
GO:0030911	TPR domain binding	1	molecular_function	EVM0007729
GO:0032212	positive regulation of telomere maintenance via telomerase	1	biological_process	EVM0005725
GO:0007008	outer mitochondrial membrane organization	1	biological_process	EVM0007729
GO:0003009	skeletal muscle contraction	1	biological_process	EVM0007729
GO:0090151	establishment of protein localization to mitochondrial membrane	1	biological_process	EVM0007729
GO:0032558	adenyl deoxyribonucleotide binding	1	molecular_function	EVM0007729
GO:0032554	purine deoxyribonucleotide binding	1	molecular_function	EVM0007729
GO:0032557	pyrimidine ribonucleotide binding	1	molecular_function	EVM0007729
GO:0032551	pyrimidine ribonucleoside binding	1	molecular_function	EVM0007729
GO:0032552	deoxyribonucleotide binding	1	molecular_function	EVM0007729
GO:0045619	regulation of lymphocyte differentiation	1	biological_process	EVM0007729
GO:1902105	regulation of leukocyte differentiation	1	biological_process	EVM0007729
GO:0045429	positive regulation of nitric oxide biosynthetic process	1	biological_process	EVM0007729
GO:0045428	regulation of nitric oxide biosynthetic process	1	biological_process	EVM0007729
GO:0045823	positive regulation of heart contraction	1	biological_process	EVM0007729
GO:0051251	positive regulation of lymphocyte activation	1	biological_process	EVM0007729
GO:0014866	skeletal myofibril assembly	1	biological_process	EVM0007729
GO:0019375	galactolipid biosynthetic process	1	biological_process	EVM0005729
GO:0003676	nucleic acid binding	1	molecular_function	EVM0004395;EVM0022630;EVM0003460;EVM0012305;EVM0016615;EVM0007729;EVM0023199;EVM0011000;EVM0019225;EVM0004448;EVM0014457
GO:0009056	catabolic process	1	biological_process	EVM0020514;EVM0004395;EVM0015281;EVM0019286;EVM0005725;EVM0002152;EVM0015441;EVM0003283;EVM0014316;EVM0010674;EVM0007729;EVM0000966;EVM0003457;EVM0019432
GO:0070589	cellular component macromolecule biosynthetic process	1	biological_process	EVM0011829;EVM0022812
GO:0008094	DNA-dependent ATPase activity	1	molecular_function	EVM0020514;EVM0015441
GO:0044038	cell wall macromolecule biosynthetic process	1	biological_process	EVM0011829;EVM0022812
GO:0000324	fungal-type vacuole	1	cellular_component	EVM0004395;EVM0010674
GO:0006458	'de novo' protein folding	1	biological_process	EVM0019286;EVM0005725
GO:0044249	cellular biosynthetic process	1	biological_process	EVM0020514;EVM0017865;EVM0011829;EVM0015655;EVM0008946;EVM0021293;EVM0024461;EVM0005729;EVM0016771;EVM0012305;EVM0015441;EVM0010674;EVM0002135;EVM0003082;EVM0007729;EVM0022812;EVM0013784;EVM0019244;EVM0011091;EVM0016432
GO:0006972	hyperosmotic response	1	biological_process	EVM0011755;EVM0021781;EVM0000941
GO:0009058	biosynthetic process	1	biological_process	EVM0020514;EVM0017865;EVM0011829;EVM0004395;EVM0015655;EVM0008946;EVM0021293;EVM0024461;EVM0005729;EVM0016771;EVM0012305;EVM0015441;EVM0010674;EVM0002135;EVM0003082;EVM0007729;EVM0022812;EVM0013784;EVM0015469;EVM0019244;EVM0011091;EVM0016432
GO:0042623	ATPase activity, coupled	1	molecular_function	EVM0020514;EVM0019286;EVM0005725;EVM0015441;EVM0007729
GO:0048584	positive regulation of response to stimulus	1	biological_process	EVM0010346;EVM0007916;EVM0019244;EVM0017312
GO:0044712	single-organism catabolic process	1	biological_process	EVM0020514;EVM0004395;EVM0015281;EVM0019286;EVM0005725;EVM0015441;EVM0003283;EVM0014316;EVM0010674;EVM0007729;EVM0019432
GO:0042562	hormone binding	1	molecular_function	EVM0009160;EVM0003561
GO:0080170	hydrogen peroxide transmembrane transport	1	biological_process	EVM0019421;EVM0001335
GO:0046939	nucleotide phosphorylation	1	biological_process	EVM0004395;EVM0014316
GO:0061024	membrane organization	1	biological_process	EVM0007729;EVM0007729;EVM0009560;EVM0009560
GO:0002682	regulation of immune system process	1	biological_process	EVM0010346;EVM0007916;EVM0007729
GO:0045927	positive regulation of growth	1	biological_process	EVM0004395;EVM0015281;EVM0003283
GO:0071310	cellular response to organic substance	1	biological_process	EVM0015281;EVM0005619;EVM0021293;EVM0003460;EVM0003283;EVM0009160;EVM0007729;EVM0012502;EVM0000941;EVM0019432;EVM0003561
GO:0010200	response to chitin	1	biological_process	EVM0009694;EVM0005619;EVM0004060;EVM0015454
GO:0022891	substrate-specific transmembrane transporter activity	1	molecular_function	EVM0019421;EVM0020411;EVM0008348;EVM0006603;EVM0008480;EVM0001335;EVM0008448;EVM0024139;EVM0008373;EVM0013704
GO:0051701	interaction with host	1	biological_process	EVM0010346;EVM0007916
GO:0006007	glucose catabolic process	1	biological_process	EVM0004395;EVM0014316
GO:1901137	carbohydrate derivative biosynthetic process	1	biological_process	EVM0021293;EVM0005729;EVM0003082;EVM0022812;EVM0019244
GO:0008194	UDP-glycosyltransferase activity	1	molecular_function	EVM0011829;EVM0015976;EVM0003082;EVM0019244;EVM0000941
GO:0097458	neuron part	1	cellular_component	EVM0004395;EVM0007729
GO:0019840	isoprenoid binding	1	molecular_function	EVM0009160;EVM0003561
GO:0032993	protein-DNA complex	1	cellular_component	EVM0011000;EVM0014457
GO:0015215	nucleotide transmembrane transporter activity	1	molecular_function	EVM0008348;EVM0008480
GO:0006006	glucose metabolic process	1	biological_process	EVM0004395;EVM0014316
GO:0043933	macromolecular complex subunit organization	1	biological_process	EVM0017865;EVM0005725;EVM0007729;EVM0003138;EVM0006448;EVM0006954
GO:0006796	phosphate-containing compound metabolic process	1	biological_process	EVM0004312;EVM0020514;EVM0004395;EVM0015281;EVM0002457;EVM0021293;EVM0019286;EVM0005725;EVM0013093;EVM0015441;EVM0003283;EVM0014316;EVM0010674;EVM0002135;EVM0007729;EVM0016432;EVM0019432
GO:0009536	plastid	1	cellular_component	EVM0020514;EVM0004395;EVM0019421;EVM0020411;EVM0018866;EVM0023007;EVM0015655;EVM0006179;EVM0021211;EVM0002152;EVM0016771;EVM0008480;EVM0023697;EVM0015441;EVM0022547;EVM0000371;EVM0004603;EVM0003082;EVM0001335;EVM0008012;EVM0017015;EVM0016941;EVM0002121;EVM0023121;EVM0012360;EVM0014754;EVM0018530;EVM0011091;EVM0009560;EVM0016432;EVM0017589;EVM0015690;EVM0005161;EVM0001654;EVM0011317;EVM0003457;EVM…
GO:1990204	oxidoreductase complex	1	cellular_component	EVM0017865;EVM0008946;EVM0011091
GO:0034613	cellular protein localization	1	biological_process	EVM0005725;EVM0010674;EVM0007729;EVM0008012;EVM0009560
GO:1901799	negative regulation of proteasomal protein catabolic process	1	biological_process	EVM0007729
GO:0035872	nucleotide-binding domain, leucine rich repeat containing receptor signaling pathway	1	biological_process	EVM0007729
GO:0005457	GDP-fucose transmembrane transporter activity	1	molecular_function	EVM0008348
GO:0032435	negative regulation of proteasomal ubiquitin-dependent protein catabolic process	1	biological_process	EVM0007729
GO:1900182	positive regulation of protein localization to nucleus	1	biological_process	EVM0007729
GO:0031990	mRNA export from nucleus in response to heat stress	1	biological_process	EVM0003460
GO:0001754	eye photoreceptor cell differentiation	1	biological_process	EVM0007729
GO:0001751	compound eye photoreceptor cell differentiation	1	biological_process	EVM0007729
GO:0004421	hydroxymethylglutaryl-CoA synthase activity	1	molecular_function	EVM0002135
GO:0010528	regulation of transposition	1	biological_process	EVM0007729
GO:0010529	negative regulation of transposition	1	biological_process	EVM0007729
GO:1904356	regulation of telomere maintenance via telomere lengthening	1	biological_process	EVM0005725
GO:0032846	positive regulation of homeostatic process	1	biological_process	EVM0005725
GO:0051099	positive regulation of binding	1	biological_process	EVM0007729
GO:0045740	positive regulation of DNA replication	1	biological_process	EVM0005725
GO:0097060	synaptic membrane	1	cellular_component	EVM0004395
GO:0003012	muscle system process	1	biological_process	EVM0007729
GO:0042307	positive regulation of protein import into nucleus	1	biological_process	EVM0007729
GO:0070207	protein homotrimerization	1	biological_process	EVM0017865
GO:0070206	protein trimerization	1	biological_process	EVM0017865
GO:0015688	iron chelate transport	1	biological_process	EVM0017881
GO:0015689	molybdate ion transport	1	biological_process	EVM0024139
GO:0006616	SRP-dependent cotranslational protein targeting to membrane, translocation	1	biological_process	EVM0010674
GO:1903051	negative regulation of proteolysis involved in cellular protein catabolic process	1	biological_process	EVM0007729
GO:0043393	regulation of protein binding	1	biological_process	EVM0007729
GO:0060330	regulation of response to interferon-gamma	1	biological_process	EVM0007729
GO:0060334	regulation of interferon-gamma-mediated signaling pathway	1	biological_process	EVM0007729
GO:0001959	regulation of cytokine-mediated signaling pathway	1	biological_process	EVM0007729
GO:1904591	positive regulation of protein import	1	biological_process	EVM0007729
GO:0000060	protein import into nucleus, translocation	1	biological_process	EVM0010674
GO:0019904	protein domain specific binding	1	molecular_function	EVM0007729
GO:0030155	regulation of cell adhesion	1	biological_process	EVM0007729
GO:0015783	GDP-fucose transport	1	biological_process	EVM0008348
GO:0032768	regulation of monooxygenase activity	1	biological_process	EVM0007729
GO:0006029	proteoglycan metabolic process	1	biological_process	EVM0003082
GO:0046530	photoreceptor cell differentiation	1	biological_process	EVM0007729
GO:0015098	molybdate ion transmembrane transporter activity	1	molecular_function	EVM0024139
GO:0031346	positive regulation of cell projection organization	1	biological_process	EVM0007729
GO:0080045	quercetin 3'-O-glucosyltransferase activity	1	molecular_function	EVM0015976
GO:0032210	regulation of telomere maintenance via telomerase	1	biological_process	EVM0005725
GO:1901678	iron coordination entity transport	1	biological_process	EVM0017881
GO:0090322	regulation of superoxide metabolic process	1	biological_process	EVM0017312
GO:0060759	regulation of response to cytokine stimulus	1	biological_process	EVM0007729
GO:0016688	L-ascorbate peroxidase activity	1	molecular_function	EVM0022009
GO:1903363	negative regulation of cellular protein catabolic process	1	biological_process	EVM0007729
GO:0031344	regulation of cell projection organization	1	biological_process	EVM0007729
GO:0006793	phosphorus metabolic process	1	biological_process	EVM0004312;EVM0020514;EVM0004395;EVM0015281;EVM0002457;EVM0021293;EVM0019286;EVM0005725;EVM0013093;EVM0015441;EVM0003283;EVM0014316;EVM0010674;EVM0002135;EVM0007729;EVM0016432;EVM0019432
GO:0008361	regulation of cell size	1	biological_process	EVM0012305;EVM0007729
GO:0045036	protein targeting to chloroplast	1	biological_process	EVM0008012;EVM0009560
GO:0072598	protein localization to chloroplast	1	biological_process	EVM0008012;EVM0009560
GO:0072596	establishment of protein localization to chloroplast	1	biological_process	EVM0008012;EVM0009560
GO:0010287	plastoglobule	1	cellular_component	EVM0004603;EVM0017589;EVM0005161
GO:0034645	cellular macromolecule biosynthetic process	1	biological_process	EVM0020514;EVM0011829;EVM0012305;EVM0015441;EVM0010674;EVM0003082;EVM0022812;EVM0019244
GO:0022892	substrate-specific transporter activity	1	molecular_function	EVM0019421;EVM0020411;EVM0008348;EVM0006603;EVM0008480;EVM0001335;EVM0008448;EVM0024139;EVM0008373;EVM0013704
GO:0016192	vesicle-mediated transport	1	biological_process	EVM0004395;EVM0015281;EVM0003283;EVM0019432
GO:0019219	regulation of nucleobase-containing compound metabolic process	1	biological_process	EVM0006657;EVM0009694;EVM0004395;EVM0022630;EVM0015281;EVM0005619;EVM0020184;EVM0004060;EVM0015947;EVM0005725;EVM0016772;EVM0012305;EVM0003283;EVM0003121;EVM0010674;EVM0007729;EVM0012502;EVM0001167;EVM0014856;EVM0019225;EVM0004448;EVM0019432
GO:0032991	macromolecular complex	1	cellular_component	EVM0017865;EVM0004395;EVM0015281;EVM0008946;EVM0019286;EVM0005729;EVM0002152;EVM0005615;EVM0023062;EVM0003283;EVM0010674;EVM0007729;EVM0008012;EVM0011000;EVM0012360;EVM0014754;EVM0011091;EVM0003457;EVM0019432;EVM0014457
GO:0009705	plant-type vacuole membrane	1	cellular_component	EVM0019421;EVM0001335;EVM0001262
GO:0046907	intracellular transport	1	biological_process	EVM0005725;EVM0003460;EVM0010674;EVM0007729;EVM0008012;EVM0009560
GO:0010383	cell wall polysaccharide metabolic process	1	biological_process	EVM0011829;EVM0022812
GO:0006275	regulation of DNA replication	1	biological_process	EVM0005725;EVM0012305
GO:0006403	RNA localization	1	biological_process	EVM0003460;EVM0007729
GO:0007568	aging	1	biological_process	EVM0004395;EVM0019286;EVM0007729;EVM0005161
GO:0050789	regulation of biological process	1	biological_process	EVM0006657;EVM0002997;EVM0009694;EVM0004395;EVM0022630;EVM0015281;EVM0005619;EVM0020184;EVM0021293;EVM0004060;EVM0015947;EVM0005725;EVM0016772;EVM0012305;EVM0003283;EVM0009160;EVM0010346;EVM0016615;EVM0007916;EVM0003121;EVM0010674;EVM0002943;EVM0007729;EVM0012502;EVM0001167;EVM0017015;EVM0002121;EVM0023121;EVM0014856;EVM0014754;EVM0019244;EVM0009560;EVM0019225;EVM0004448;EVM0005161;EVM0019432;EVM…
GO:0051171	regulation of nitrogen compound metabolic process	1	biological_process	EVM0006657;EVM0009694;EVM0004395;EVM0022630;EVM0015281;EVM0005619;EVM0020184;EVM0004060;EVM0015947;EVM0005725;EVM0016772;EVM0012305;EVM0003283;EVM0003121;EVM0010674;EVM0007729;EVM0012502;EVM0001167;EVM0023121;EVM0014856;EVM0019225;EVM0004448;EVM0019432
GO:0016787	hydrolase activity	1	molecular_function	EVM0001485;EVM0020514;EVM0015281;EVM0015655;EVM0019286;EVM0005725;EVM0016771;EVM0015441;EVM0003283;EVM0009306;EVM0010674;EVM0002943;EVM0007729;EVM0000966;EVM0001654;EVM0019432
GO:0045089	positive regulation of innate immune response	1	biological_process	EVM0010346;EVM0007916
GO:0008340	determination of adult lifespan	1	biological_process	EVM0004395;EVM0007729
GO:0051707	response to other organism	1	biological_process	EVM0004395;EVM0008348;EVM0004060;EVM0021211;EVM0021498;EVM0020785;EVM0010346;EVM0007916;EVM0006282;EVM0002121;EVM0014754;EVM0005161;EVM0017881;EVM0016833
GO:0043207	response to external biotic stimulus	1	biological_process	EVM0004395;EVM0008348;EVM0004060;EVM0021211;EVM0021498;EVM0020785;EVM0010346;EVM0007916;EVM0006282;EVM0002121;EVM0014754;EVM0005161;EVM0017881;EVM0016833
GO:0031347	regulation of defense response	1	biological_process	EVM0006657;EVM0010346;EVM0007916;EVM0007729
GO:0055065	metal ion homeostasis	1	biological_process	EVM0022547;EVM0023121;EVM0008448
GO:0005794	Golgi apparatus	1	cellular_component	EVM0011829;EVM0019120;EVM0018866;EVM0008348;EVM0005950;EVM0021211;EVM0021498;EVM0020785;EVM0003082;EVM0004356;EVM0022812;EVM0014754;EVM0007336;EVM0004731
GO:0070062	extracellular exosome	1	cellular_component	EVM0004395
GO:0032434	regulation of proteasomal ubiquitin-dependent protein catabolic process	1	biological_process	EVM0007729
GO:1900180	regulation of protein localization to nucleus	1	biological_process	EVM0007729
GO:0018126	protein hydroxylation	1	biological_process	EVM0021211
GO:1903706	regulation of hemopoiesis	1	biological_process	EVM0007729
GO:0090079	translation regulator activity, nucleic acid binding	1	molecular_function	EVM0004448
GO:1904589	regulation of protein import	1	biological_process	EVM0007729
GO:0031545	peptidyl-proline 4-dioxygenase activity	1	molecular_function	EVM0021211
GO:0043248	proteasome assembly	1	biological_process	EVM0005725
GO:0061136	regulation of proteasomal protein catabolic process	1	biological_process	EVM0007729
GO:0040018	positive regulation of multicellular organism growth	1	biological_process	EVM0004395
GO:0004089	carbonate dehydratase activity	1	molecular_function	EVM0017865
GO:0043524	negative regulation of neuron apoptotic process	1	biological_process	EVM0007729
GO:0042306	regulation of protein import into nucleus	1	biological_process	EVM0007729
GO:0032204	regulation of telomere maintenance	1	biological_process	EVM0005725
GO:1903561	extracellular vesicle	1	cellular_component	EVM0004395
GO:0006094	gluconeogenesis	1	biological_process	EVM0004395
GO:0004634	phosphopyruvate hydratase activity	1	molecular_function	EVM0004395
GO:0019798	procollagen-proline dioxygenase activity	1	molecular_function	EVM0021211
GO:0008515	sucrose transmembrane transporter activity	1	molecular_function	EVM0008373
GO:0010280	UDP-L-rhamnose synthase activity	1	molecular_function	EVM0021293
GO:0004656	procollagen-proline 4-dioxygenase activity	1	molecular_function	EVM0021211
GO:0019471	4-hydroxyproline metabolic process	1	biological_process	EVM0021211
GO:0015035	protein disulfide oxidoreductase activity	1	molecular_function	EVM0021211
GO:0043230	extracellular organelle	1	cellular_component	EVM0004395
GO:0050377	UDP-glucose 4,6-dehydratase activity	1	molecular_function	EVM0021293
GO:0007411	axon guidance	1	biological_process	EVM0007729
GO:2000573	positive regulation of DNA biosynthetic process	1	biological_process	EVM0005725
GO:1901215	negative regulation of neuron death	1	biological_process	EVM0007729
GO:0097485	neuron projection guidance	1	biological_process	EVM0007729
GO:0007169	transmembrane receptor protein tyrosine kinase signaling pathway	1	biological_process	EVM0007729
GO:0019511	peptidyl-proline hydroxylation	1	biological_process	EVM0021211
GO:0036080	purine nucleotide-sugar transmembrane transporter activity	1	molecular_function	EVM0008348
GO:0065010	extracellular membrane-bounded organelle	1	cellular_component	EVM0004395
GO:0018401	peptidyl-proline hydroxylation to 4-hydroxy-L-proline	1	biological_process	EVM0021211
GO:0031543	peptidyl-proline dioxygenase activity	1	molecular_function	EVM0021211
GO:0000900	translation repressor activity, nucleic acid binding	1	molecular_function	EVM0004448
GO:0090480	purine nucleotide-sugar transmembrane transport	1	biological_process	EVM0008348
GO:0010148	transpiration	1	biological_process	EVM0013457
GO:0043178	alcohol binding	1	molecular_function	EVM0009160;EVM0003561
GO:0010259	multicellular organism aging	1	biological_process	EVM0004395;EVM0007729
GO:0032269	negative regulation of cellular protein metabolic process	1	biological_process	EVM0007729;EVM0023121;EVM0004448
GO:0032787	monocarboxylic acid metabolic process	1	biological_process	EVM0004395;EVM0015655;EVM0021211;EVM0014316;EVM0011091;EVM0016432
GO:0044248	cellular catabolic process	1	biological_process	EVM0020514;EVM0015281;EVM0019286;EVM0005725;EVM0002152;EVM0015441;EVM0003283;EVM0010674;EVM0007729;EVM0000966;EVM0003457;EVM0019432
GO:0040035	hermaphrodite genitalia development	1	biological_process	EVM0004395;EVM0007729
GO:0015605	organophosphate ester transmembrane transporter activity	1	molecular_function	EVM0008348;EVM0008480
GO:0033293	monocarboxylic acid binding	1	molecular_function	EVM0009160;EVM0003561
GO:0019320	hexose catabolic process	1	biological_process	EVM0004395;EVM0014316
GO:0006357	regulation of transcription from RNA polymerase II promoter	1	biological_process	EVM0004395;EVM0007729
GO:0010876	lipid localization	1	biological_process	EVM0015281;EVM0003283
GO:0048806	genitalia development	1	biological_process	EVM0004395;EVM0007729
GO:0005875	microtubule associated complex	1	cellular_component	EVM0015281;EVM0003283
GO:0031349	positive regulation of defense response	1	biological_process	EVM0010346;EVM0007916
GO:0016757	transferase activity, transferring glycosyl groups	1	molecular_function	EVM0011829;EVM0015976;EVM0003082;EVM0022812;EVM0019244;EVM0000941

## Sheet: ABA  24h
id	description	q-value	namespace	genes_in_study
GO:0071353	cellular response to interleukin-4	0	biological_process	EVM0003283;EVM0012067;EVM0019432;EVM0007729;EVM0015281
GO:0070670	response to interleukin-4	0	biological_process	EVM0003283;EVM0012067;EVM0019432;EVM0007729;EVM0015281
GO:0000398	mRNA splicing, via spliceosome	0	biological_process	EVM0006441;EVM0010431;EVM0020662;EVM0008114;EVM0008235;EVM0006905;EVM0013354;EVM0005479;EVM0008185;EVM0019863
GO:0000375	RNA splicing, via transesterification reactions	0	biological_process	EVM0006441;EVM0010431;EVM0024555;EVM0020662;EVM0008114;EVM0008235;EVM0006905;EVM0013354;EVM0005479;EVM0008185;EVM0019863
GO:0000377	RNA splicing, via transesterification reactions with bulged adenosine as nucleophile	0	biological_process	EVM0006441;EVM0010431;EVM0024555;EVM0020662;EVM0008114;EVM0008235;EVM0006905;EVM0013354;EVM0005479;EVM0008185;EVM0019863
GO:0051082	unfolded protein binding	0	molecular_function	EVM0003283;EVM0003460;EVM0022547;EVM0012067;EVM0019432;EVM0010674;EVM0019668;EVM0019286;EVM0005725;EVM0007729;EVM0015281;EVM0021781
GO:0005524	ATP binding	0	molecular_function	EVM0015227;EVM0012067;EVM0008114;EVM0010674;EVM0021498;EVM0009637;EVM0019668;EVM0019286;EVM0010017;EVM0008366;EVM0008597;EVM0007047;EVM0011111;EVM0000299;EVM0007729;EVM0014635;EVM0012170;EVM0005161
GO:0030554	adenyl nucleotide binding	0	molecular_function	EVM0015227;EVM0012067;EVM0008114;EVM0010674;EVM0021498;EVM0009637;EVM0019668;EVM0019286;EVM0010017;EVM0008366;EVM0008597;EVM0007047;EVM0011111;EVM0000299;EVM0007729;EVM0014635;EVM0012170;EVM0005161
GO:0032559	adenyl ribonucleotide binding	0	molecular_function	EVM0015227;EVM0012067;EVM0008114;EVM0010674;EVM0021498;EVM0009637;EVM0019668;EVM0019286;EVM0010017;EVM0008366;EVM0008597;EVM0007047;EVM0011111;EVM0000299;EVM0007729;EVM0014635;EVM0012170;EVM0005161
GO:0042470	melanosome	0	cellular_component	EVM0003283;EVM0012067;EVM0019432;EVM0010674;EVM0007729;EVM0015281
GO:0048770	pigment granule	0	cellular_component	EVM0003283;EVM0012067;EVM0019432;EVM0010674;EVM0007729;EVM0015281
GO:1902582	single-organism intracellular transport	0	biological_process	EVM0019059;EVM0012067;EVM0010674;EVM0002650;EVM0002319;EVM0023313;EVM0000741;EVM0024064;EVM0023989;EVM0015217;EVM0007729;EVM0006139;EVM0008896
GO:0035194	posttranscriptional gene silencing by RNA	0	biological_process	EVM0023675;EVM0010431;EVM0003283;EVM0021361;EVM0003526;EVM0001180;EVM0007250;EVM0023989;EVM0010888;EVM0018978;EVM0003978;EVM0015281
GO:1902580	single-organism cellular localization	0	biological_process	EVM0019059;EVM0012067;EVM0010674;EVM0002650;EVM0002319;EVM0023313;EVM0000741;EVM0024064;EVM0023989;EVM0015217;EVM0007729;EVM0006139;EVM0008896
GO:0008380	RNA splicing	0	biological_process	EVM0006441;EVM0010431;EVM0024555;EVM0020662;EVM0008114;EVM0008235;EVM0016615;EVM0006905;EVM0012962;EVM0013354;EVM0022236;EVM0005479;EVM0010888;EVM0008185;EVM0019863
GO:0032553	ribonucleotide binding	0	molecular_function	EVM0015227;EVM0012067;EVM0008114;EVM0010674;EVM0021498;EVM0009637;EVM0002650;EVM0019668;EVM0020895;EVM0019286;EVM0010017;EVM0008366;EVM0008597;EVM0007047;EVM0011111;EVM0000299;EVM0007729;EVM0014635;EVM0013645;EVM0012170;EVM0005161
GO:0072594	establishment of protein localization to organelle	0	biological_process	EVM0019059;EVM0010865;EVM0012067;EVM0020503;EVM0010674;EVM0002319;EVM0023313;EVM0000741;EVM0024064;EVM0023989;EVM0008366;EVM0005725;EVM0015217;EVM0007729;EVM0006139;EVM0012170;EVM0008896
GO:0044451	nucleoplasm part	0	cellular_component	EVM0023675;EVM0006441;EVM0021361;EVM0024420;EVM0020662;EVM0008114;EVM0015946;EVM0006905;EVM0022697;EVM0013354;EVM0022236;EVM0016576;EVM0001202;EVM0023101;EVM0022952;EVM0011797;EVM0010888;EVM0003476;EVM0004207;EVM0013327;EVM0017806
GO:0046034	ATP metabolic process	0	biological_process	EVM0010959;EVM0000162;EVM0003283;EVM0014316;EVM0012067;EVM0019432;EVM0008114;EVM0010674;EVM0015439;EVM0006860;EVM0011776;EVM0023231;EVM0011390;EVM0019668;EVM0019286;EVM0005879;EVM0014049;EVM0010017;EVM0011386;EVM0008185;EVM0005725;EVM0007729;EVM0015281;EVM0013575;EVM0019863;EVM0006083
GO:0009986	cell surface	0	cellular_component	EVM0003283;EVM0012067;EVM0019432;EVM0001669;EVM0007346;EVM0007729;EVM0015281;EVM0013645
GO:0006396	RNA processing	0	biological_process	EVM0016827;EVM0023675;EVM0006441;EVM0010431;EVM0021361;EVM0024555;EVM0020662;EVM0008114;EVM0001180;EVM0008235;EVM0021370;EVM0016615;EVM0006905;EVM0011776;EVM0012962;EVM0013354;EVM0022236;EVM0005309;EVM0007250;EVM0015062;EVM0005479;EVM0010888;EVM0008185;EVM0014419;EVM0002803;EVM0019863
GO:0009125	nucleoside monophosphate catabolic process	0	biological_process	EVM0010959;EVM0000162;EVM0003283;EVM0012067;EVM0019432;EVM0008114;EVM0010674;EVM0015439;EVM0006860;EVM0011776;EVM0023231;EVM0011390;EVM0019668;EVM0019286;EVM0005879;EVM0014049;EVM0011386;EVM0008185;EVM0005725;EVM0007729;EVM0015281;EVM0013575;EVM0019863;EVM0006083
GO:0009169	purine ribonucleoside monophosphate catabolic process	0	biological_process	EVM0010959;EVM0000162;EVM0003283;EVM0012067;EVM0019432;EVM0008114;EVM0010674;EVM0015439;EVM0006860;EVM0011776;EVM0023231;EVM0011390;EVM0019668;EVM0019286;EVM0005879;EVM0014049;EVM0011386;EVM0008185;EVM0005725;EVM0007729;EVM0015281;EVM0013575;EVM0019863;EVM0006083
GO:0009158	ribonucleoside monophosphate catabolic process	0	biological_process	EVM0010959;EVM0000162;EVM0003283;EVM0012067;EVM0019432;EVM0008114;EVM0010674;EVM0015439;EVM0006860;EVM0011776;EVM0023231;EVM0011390;EVM0019668;EVM0019286;EVM0005879;EVM0014049;EVM0011386;EVM0008185;EVM0005725;EVM0007729;EVM0015281;EVM0013575;EVM0019863;EVM0006083
GO:0006200	obsolete ATP catabolic process	0	biological_process	EVM0010959;EVM0000162;EVM0003283;EVM0012067;EVM0019432;EVM0008114;EVM0010674;EVM0015439;EVM0006860;EVM0011776;EVM0023231;EVM0011390;EVM0019668;EVM0019286;EVM0005879;EVM0014049;EVM0011386;EVM0008185;EVM0005725;EVM0007729;EVM0015281;EVM0013575;EVM0019863;EVM0006083
GO:0009128	purine nucleoside monophosphate catabolic process	0	biological_process	EVM0010959;EVM0000162;EVM0003283;EVM0012067;EVM0019432;EVM0008114;EVM0010674;EVM0015439;EVM0006860;EVM0011776;EVM0023231;EVM0011390;EVM0019668;EVM0019286;EVM0005879;EVM0014049;EVM0011386;EVM0008185;EVM0005725;EVM0007729;EVM0015281;EVM0013575;EVM0019863;EVM0006083
GO:1901658	glycosyl compound catabolic process	0	biological_process	EVM0010959;EVM0000162;EVM0003283;EVM0012067;EVM0019432;EVM0020662;EVM0008114;EVM0010674;EVM0015439;EVM0006860;EVM0011776;EVM0023231;EVM0019142;EVM0011390;EVM0019668;EVM0019286;EVM0005879;EVM0014049;EVM0011386;EVM0008185;EVM0005725;EVM0007729;EVM0015281;EVM0013575;EVM0019863;EVM0006083
GO:0010629	negative regulation of gene expression	0	biological_process	EVM0009694;EVM0023675;EVM0010431;EVM0003283;EVM0021361;EVM0020160;EVM0013200;EVM0003526;EVM0008114;EVM0010674;EVM0001180;EVM0017877;EVM0013488;EVM0007250;EVM0003939;EVM0023989;EVM0010888;EVM0014427;EVM0018978;EVM0007823;EVM0003978;EVM0004207;EVM0015286;EVM0015281;EVM0012359;EVM0022508
GO:0046130	purine ribonucleoside catabolic process	0	biological_process	EVM0010959;EVM0000162;EVM0003283;EVM0012067;EVM0019432;EVM0020662;EVM0008114;EVM0010674;EVM0015439;EVM0006860;EVM0011776;EVM0023231;EVM0011390;EVM0019668;EVM0019286;EVM0005879;EVM0014049;EVM0011386;EVM0008185;EVM0005725;EVM0007729;EVM0015281;EVM0013575;EVM0019863;EVM0006083
GO:0006457	protein folding	0	biological_process	EVM0003283;EVM0003460;EVM0006954;EVM0012067;EVM0010674;EVM0021002;EVM0019668;EVM0009859;EVM0019286;EVM0000411;EVM0012360;EVM0006448;EVM0015640;EVM0005725;EVM0007729;EVM0015281;EVM0021781
GO:1901136	carbohydrate derivative catabolic process	0	biological_process	EVM0010959;EVM0000162;EVM0003283;EVM0012067;EVM0019432;EVM0020662;EVM0008114;EVM0010674;EVM0015439;EVM0006860;EVM0011776;EVM0023231;EVM0019142;EVM0011390;EVM0019668;EVM0019286;EVM0005879;EVM0014049;EVM0011386;EVM0008185;EVM0005725;EVM0007729;EVM0015281;EVM0013575;EVM0019863;EVM0006083
GO:0006152	purine nucleoside catabolic process	0	biological_process	EVM0010959;EVM0000162;EVM0003283;EVM0012067;EVM0019432;EVM0020662;EVM0008114;EVM0010674;EVM0015439;EVM0006860;EVM0011776;EVM0023231;EVM0011390;EVM0019668;EVM0019286;EVM0005879;EVM0014049;EVM0011386;EVM0008185;EVM0005725;EVM0007729;EVM0015281;EVM0013575;EVM0019863;EVM0006083
GO:0051641	cellular localization	0	biological_process	EVM0010431;EVM0021117;EVM0003283;EVM0019059;EVM0003460;EVM0013142;EVM0010865;EVM0012067;EVM0019432;EVM0008114;EVM0020503;EVM0010674;EVM0004184;EVM0002650;EVM0021375;EVM0002319;EVM0009312;EVM0023313;EVM0019142;EVM0000741;EVM0024064;EVM0008567;EVM0023989;EVM0017015;EVM0008366;EVM0005725;EVM0015217;EVM0007729;EVM0006139;EVM0015281;EVM0013645;EVM0012170;EVM0008896
GO:0046686	response to cadmium ion	0	biological_process	EVM0013186;EVM0003764;EVM0000162;EVM0015227;EVM0022547;EVM0008305;EVM0011369;EVM0007887;EVM0003824;EVM0002075;EVM0021498;EVM0004184;EVM0009637;EVM0024003;EVM0006860;EVM0017982;EVM0007120;EVM0014242;EVM0016332;EVM0007444;EVM0000327;EVM0014754;EVM0015699;EVM0003835;EVM0017312;EVM0005239;EVM0008247;EVM0016059;EVM0010017;EVM0008567;EVM0017015;EVM0008366;EVM0008597;EVM0007047;EVM0011111;EVM0000299;EVM…
GO:0051246	regulation of protein metabolic process	0	biological_process	EVM0010431;EVM0003283;EVM0020160;EVM0007731;EVM0015490;EVM0007887;EVM0012067;EVM0019432;EVM0008114;EVM0023248;EVM0008669;EVM0022208;EVM0007250;EVM0023989;EVM0010888;EVM0018978;EVM0003978;EVM0007729;EVM0015286;EVM0015281
GO:0009408	response to heat	0	biological_process	EVM0013186;EVM0016555;EVM0003764;EVM0015227;EVM0015798;EVM0003283;EVM0003460;EVM0013984;EVM0006954;EVM0012067;EVM0004828;EVM0010674;EVM0004853;EVM0021498;EVM0009637;EVM0021375;EVM0017982;EVM0014754;EVM0021002;EVM0002943;EVM0019668;EVM0009859;EVM0019286;EVM0023101;EVM0006448;EVM0008366;EVM0008597;EVM0015640;EVM0012502;EVM0000299;EVM0005619;EVM0007729;EVM0015281;EVM0021781;EVM0012170;EVM0016092
GO:0071705	nitrogen compound transport	0	biological_process	EVM0010431;EVM0003283;EVM0019059;EVM0003460;EVM0005554;EVM0013142;EVM0010865;EVM0002453;EVM0012067;EVM0020503;EVM0010674;EVM0004184;EVM0002650;EVM0002319;EVM0009312;EVM0023313;EVM0000741;EVM0024064;EVM0008567;EVM0023989;EVM0017015;EVM0008366;EVM0007950;EVM0005725;EVM0015217;EVM0007729;EVM0006139;EVM0015281;EVM0012170;EVM0019421;EVM0008896;EVM0006083
GO:0010605	negative regulation of macromolecule metabolic process	0	biological_process	EVM0019582;EVM0009694;EVM0023675;EVM0010431;EVM0003283;EVM0021361;EVM0020160;EVM0013200;EVM0003526;EVM0012067;EVM0008114;EVM0010674;EVM0001180;EVM0017877;EVM0013488;EVM0007250;EVM0003939;EVM0023989;EVM0010888;EVM0014427;EVM0018978;EVM0007823;EVM0003978;EVM0004207;EVM0007729;EVM0015286;EVM0015281;EVM0012359;EVM0022508
GO:0009164	nucleoside catabolic process	0	biological_process	EVM0010959;EVM0000162;EVM0003283;EVM0012067;EVM0019432;EVM0020662;EVM0008114;EVM0010674;EVM0015439;EVM0006860;EVM0011776;EVM0023231;EVM0011390;EVM0019668;EVM0019286;EVM0005879;EVM0014049;EVM0011386;EVM0008185;EVM0005725;EVM0007729;EVM0015281;EVM0013575;EVM0019863;EVM0006083
GO:0042454	ribonucleoside catabolic process	0	biological_process	EVM0010959;EVM0000162;EVM0003283;EVM0012067;EVM0019432;EVM0020662;EVM0008114;EVM0010674;EVM0015439;EVM0006860;EVM0011776;EVM0023231;EVM0011390;EVM0019668;EVM0019286;EVM0005879;EVM0014049;EVM0011386;EVM0008185;EVM0005725;EVM0007729;EVM0015281;EVM0013575;EVM0019863;EVM0006083
GO:0010604	positive regulation of macromolecule metabolic process	0	biological_process	EVM0006441;EVM0003283;EVM0017298;EVM0023073;EVM0007731;EVM0015490;EVM0012067;EVM0019432;EVM0008114;EVM0002036;EVM0006905;EVM0022697;EVM0017877;EVM0016772;EVM0008669;EVM0022208;EVM0012502;EVM0005725;EVM0005752;EVM0005619;EVM0001115;EVM0002705;EVM0007729;EVM0015281;EVM0012359
GO:0010467	gene expression	0	biological_process	EVM0016827;EVM0023675;EVM0006441;EVM0010431;EVM0021361;EVM0020160;EVM0024555;EVM0020662;EVM0008114;EVM0010674;EVM0001180;EVM0008235;EVM0002650;EVM0021370;EVM0016615;EVM0006905;EVM0011776;EVM0007120;EVM0012962;EVM0013354;EVM0022236;EVM0019450;EVM0020895;EVM0005309;EVM0007250;EVM0015062;EVM0005479;EVM0010888;EVM0001879;EVM0008185;EVM0014419;EVM0005752;EVM0003583;EVM0002803;EVM0019863
GO:0008104	protein localization	0	biological_process	EVM0003283;EVM0019059;EVM0013142;EVM0010865;EVM0012067;EVM0020503;EVM0010674;EVM0004184;EVM0002650;EVM0002319;EVM0009312;EVM0023313;EVM0019668;EVM0019286;EVM0000741;EVM0024064;EVM0008567;EVM0023989;EVM0017015;EVM0008366;EVM0005725;EVM0015217;EVM0007729;EVM0006139;EVM0015281;EVM0012170;EVM0008896
GO:0072523	purine-containing compound catabolic process	0	biological_process	EVM0010959;EVM0000162;EVM0003283;EVM0012067;EVM0019432;EVM0020662;EVM0008114;EVM0010674;EVM0015439;EVM0006860;EVM0011776;EVM0023231;EVM0011390;EVM0019668;EVM0019286;EVM0005879;EVM0014049;EVM0011386;EVM0008185;EVM0005725;EVM0007729;EVM0015281;EVM0013575;EVM0019863;EVM0006083
GO:0048522	positive regulation of cellular process	0	biological_process	EVM0006441;EVM0003283;EVM0017298;EVM0023073;EVM0007731;EVM0015490;EVM0012067;EVM0019432;EVM0008114;EVM0002036;EVM0021375;EVM0016615;EVM0006905;EVM0022697;EVM0012902;EVM0017312;EVM0012288;EVM0017877;EVM0016772;EVM0008669;EVM0022208;EVM0008184;EVM0012502;EVM0005725;EVM0005752;EVM0005619;EVM0001115;EVM0002705;EVM0007729;EVM0015286;EVM0015281;EVM0012359
GO:0051173	positive regulation of nitrogen compound metabolic process	0	biological_process	EVM0006441;EVM0003283;EVM0017298;EVM0023073;EVM0012067;EVM0019432;EVM0008114;EVM0002036;EVM0006905;EVM0022697;EVM0017877;EVM0016772;EVM0022208;EVM0012502;EVM0005725;EVM0005752;EVM0005619;EVM0001115;EVM0002705;EVM0007729;EVM0015281;EVM0012359
GO:0006605	protein targeting	0	biological_process	EVM0019059;EVM0010865;EVM0012067;EVM0020503;EVM0010674;EVM0002650;EVM0002319;EVM0023313;EVM0000741;EVM0024064;EVM0023989;EVM0008366;EVM0005725;EVM0015217;EVM0007729;EVM0006139;EVM0012170;EVM0008896
GO:0070647	protein modification by small protein conjugation or removal	0	biological_process	EVM0001082;EVM0011882;EVM0021086;EVM0021498;EVM0012449;EVM0013638;EVM0014242;EVM0012902;EVM0011127;EVM0023101;EVM0024152;EVM0008662;EVM0000252;EVM0006216;EVM0020030;EVM0006711;EVM0023317;EVM0018295;EVM0017024;EVM0015286;EVM0017482
GO:0016887	ATPase activity	0	molecular_function	EVM0010959;EVM0000162;EVM0003283;EVM0012067;EVM0019432;EVM0008114;EVM0010674;EVM0015439;EVM0006860;EVM0011776;EVM0023231;EVM0011390;EVM0019668;EVM0019286;EVM0005879;EVM0014049;EVM0011386;EVM0008185;EVM0005725;EVM0007729;EVM0015281;EVM0013575;EVM0019863;EVM0006083
GO:0046700	heterocycle catabolic process	0	biological_process	EVM0010959;EVM0000162;EVM0003283;EVM0013200;EVM0003526;EVM0012067;EVM0019432;EVM0020662;EVM0008114;EVM0010674;EVM0015439;EVM0006860;EVM0011776;EVM0023231;EVM0019142;EVM0011390;EVM0019668;EVM0019286;EVM0005879;EVM0014049;EVM0003939;EVM0011386;EVM0008185;EVM0005725;EVM0007729;EVM0015281;EVM0013575;EVM0019863;EVM0006083
GO:0006886	intracellular protein transport	0	biological_process	EVM0019059;EVM0013142;EVM0010865;EVM0012067;EVM0020503;EVM0010674;EVM0002650;EVM0002319;EVM0009312;EVM0023313;EVM0000741;EVM0024064;EVM0023989;EVM0008366;EVM0005725;EVM0015217;EVM0007729;EVM0006139;EVM0012170;EVM0008896
GO:0009167	purine ribonucleoside monophosphate metabolic process	0	biological_process	EVM0010959;EVM0000162;EVM0003283;EVM0014316;EVM0012067;EVM0019432;EVM0008114;EVM0010674;EVM0015439;EVM0006860;EVM0011776;EVM0023231;EVM0011390;EVM0019668;EVM0019286;EVM0005879;EVM0014049;EVM0010017;EVM0011386;EVM0008185;EVM0005725;EVM0007729;EVM0015281;EVM0013575;EVM0019863;EVM0006083
GO:0009126	purine nucleoside monophosphate metabolic process	0	biological_process	EVM0010959;EVM0000162;EVM0003283;EVM0014316;EVM0012067;EVM0019432;EVM0008114;EVM0010674;EVM0015439;EVM0006860;EVM0011776;EVM0023231;EVM0011390;EVM0019668;EVM0019286;EVM0005879;EVM0014049;EVM0010017;EVM0011386;EVM0008185;EVM0005725;EVM0007729;EVM0015281;EVM0013575;EVM0019863;EVM0006083
GO:0017038	protein import	0	biological_process	EVM0019059;EVM0012067;EVM0010674;EVM0002319;EVM0023313;EVM0000741;EVM0024064;EVM0023989;EVM0015217;EVM0007729;EVM0006139;EVM0008896
GO:0009644	response to high light intensity	0	biological_process	EVM0015798;EVM0003460;EVM0006954;EVM0004853;EVM0021498;EVM0021002;EVM0009859;EVM0006448;EVM0015640;EVM0005619;EVM0021781;EVM0022508
GO:0033365	protein localization to organelle	0	biological_process	EVM0019059;EVM0010865;EVM0012067;EVM0020503;EVM0010674;EVM0002319;EVM0023313;EVM0000741;EVM0024064;EVM0023989;EVM0008366;EVM0005725;EVM0015217;EVM0007729;EVM0006139;EVM0012170;EVM0008896
GO:0044270	cellular nitrogen compound catabolic process	0	biological_process	EVM0010959;EVM0000162;EVM0003283;EVM0013200;EVM0003526;EVM0012067;EVM0019432;EVM0020662;EVM0008114;EVM0010674;EVM0015439;EVM0006860;EVM0011776;EVM0023231;EVM0019142;EVM0011390;EVM0019668;EVM0000966;EVM0019286;EVM0005879;EVM0014049;EVM0003939;EVM0011386;EVM0008185;EVM0005725;EVM0007729;EVM0015281;EVM0013575;EVM0019863;EVM0006083
GO:0051649	establishment of localization in cell	0	biological_process	EVM0010431;EVM0021117;EVM0003283;EVM0019059;EVM0003460;EVM0013142;EVM0010865;EVM0012067;EVM0019432;EVM0020503;EVM0010674;EVM0004184;EVM0002650;EVM0002319;EVM0009312;EVM0023313;EVM0000741;EVM0024064;EVM0008567;EVM0023989;EVM0017015;EVM0008366;EVM0005725;EVM0015217;EVM0007729;EVM0006139;EVM0015281;EVM0013645;EVM0012170;EVM0008896
GO:0097367	carbohydrate derivative binding	0	molecular_function	EVM0015227;EVM0012067;EVM0008114;EVM0010674;EVM0021498;EVM0009637;EVM0002650;EVM0019668;EVM0020895;EVM0019286;EVM0010017;EVM0008366;EVM0008597;EVM0007047;EVM0011111;EVM0000299;EVM0007729;EVM0014635;EVM0013645;EVM0012170;EVM0005161
GO:0009642	response to light intensity	0	biological_process	EVM0015798;EVM0003460;EVM0008309;EVM0006954;EVM0004853;EVM0021498;EVM0021002;EVM0009859;EVM0006448;EVM0014049;EVM0015640;EVM0005619;EVM0021781;EVM0022508
GO:0006325	chromatin organization	0	biological_process	EVM0010590;EVM0010590;EVM0023073;EVM0023073;EVM0022138;EVM0022138;EVM0007731;EVM0007731;EVM0016969;EVM0016969;EVM0022697;EVM0022697;EVM0017877;EVM0005879;EVM0005879;EVM0007250;EVM0010888;EVM0010888;EVM0007823;EVM0007823;EVM0005686;EVM0005686;EVM0004207;EVM0014351;EVM0014351;EVM0012359
GO:0009161	ribonucleoside monophosphate metabolic process	0	biological_process	EVM0010959;EVM0000162;EVM0003283;EVM0014316;EVM0012067;EVM0019432;EVM0008114;EVM0010674;EVM0015439;EVM0006860;EVM0011776;EVM0023231;EVM0011390;EVM0019668;EVM0019286;EVM0005879;EVM0014049;EVM0010017;EVM0011386;EVM0008185;EVM0005725;EVM0007729;EVM0015281;EVM0013575;EVM0019863;EVM0006083
GO:0070727	cellular macromolecule localization	0	biological_process	EVM0019059;EVM0013142;EVM0010865;EVM0012067;EVM0008114;EVM0020503;EVM0010674;EVM0002650;EVM0021375;EVM0002319;EVM0009312;EVM0023313;EVM0019142;EVM0000741;EVM0024064;EVM0023989;EVM0008366;EVM0005725;EVM0015217;EVM0007729;EVM0006139;EVM0012170;EVM0008896
GO:0019787	ubiquitin-like protein transferase activity	0	molecular_function	EVM0001082;EVM0021086;EVM0012449;EVM0013638;EVM0014242;EVM0012902;EVM0011127;EVM0023101;EVM0024152;EVM0008662;EVM0000252;EVM0006216;EVM0006711;EVM0023317;EVM0018295;EVM0017024;EVM0017482
GO:0040029	regulation of gene expression, epigenetic	0	biological_process	EVM0023675;EVM0010431;EVM0003283;EVM0021361;EVM0003526;EVM0007731;EVM0001180;EVM0017877;EVM0005879;EVM0007250;EVM0023989;EVM0010888;EVM0018978;EVM0003978;EVM0020274;EVM0004207;EVM0015281;EVM0014351;EVM0012359
GO:0046434	organophosphate catabolic process	0	biological_process	EVM0010959;EVM0000162;EVM0003283;EVM0012067;EVM0019432;EVM0020662;EVM0008114;EVM0010674;EVM0015439;EVM0006860;EVM0011776;EVM0023231;EVM0011390;EVM0019668;EVM0019286;EVM0005879;EVM0014049;EVM0011386;EVM0008185;EVM0005725;EVM0007729;EVM0015281;EVM0013575;EVM0019863;EVM0006083
GO:0016482	cytosolic transport	0	biological_process	EVM0010431;EVM0021117;EVM0019059;EVM0003460;EVM0013142;EVM0010865;EVM0012067;EVM0020503;EVM0010674;EVM0002650;EVM0002319;EVM0023313;EVM0000741;EVM0024064;EVM0023989;EVM0008366;EVM0005725;EVM0015217;EVM0007729;EVM0006139;EVM0012170;EVM0008896
GO:1901361	organic cyclic compound catabolic process	0	biological_process	EVM0010959;EVM0000162;EVM0003283;EVM0013200;EVM0003526;EVM0012067;EVM0019432;EVM0020662;EVM0008114;EVM0010674;EVM0015439;EVM0006860;EVM0011776;EVM0023231;EVM0019142;EVM0011390;EVM0019668;EVM0019286;EVM0005879;EVM0014049;EVM0003939;EVM0011386;EVM0008185;EVM0005725;EVM0007729;EVM0015281;EVM0013575;EVM0019863;EVM0006083
GO:0005654	nucleoplasm	0	cellular_component	EVM0023675;EVM0006441;EVM0021117;EVM0019769;EVM0021361;EVM0011313;EVM0024420;EVM0020662;EVM0008114;EVM0015946;EVM0006905;EVM0022697;EVM0013354;EVM0022236;EVM0016576;EVM0001202;EVM0023101;EVM0022952;EVM0011797;EVM0010888;EVM0008185;EVM0003476;EVM0013327;EVM0017806
GO:0032268	regulation of cellular protein metabolic process	0	biological_process	EVM0010431;EVM0003283;EVM0020160;EVM0007731;EVM0015490;EVM0007887;EVM0012067;EVM0019432;EVM0008114;EVM0008669;EVM0022208;EVM0007250;EVM0023989;EVM0010888;EVM0018978;EVM0003978;EVM0007729;EVM0015286;EVM0015281
GO:0015031	protein transport	0	biological_process	EVM0003283;EVM0019059;EVM0013142;EVM0010865;EVM0012067;EVM0020503;EVM0010674;EVM0004184;EVM0002650;EVM0002319;EVM0009312;EVM0023313;EVM0000741;EVM0024064;EVM0008567;EVM0023989;EVM0017015;EVM0008366;EVM0005725;EVM0015217;EVM0007729;EVM0006139;EVM0015281;EVM0012170;EVM0008896
GO:0032446	protein modification by small protein conjugation	0	biological_process	EVM0001082;EVM0011882;EVM0021086;EVM0021498;EVM0012449;EVM0013638;EVM0014242;EVM0012902;EVM0011127;EVM0023101;EVM0024152;EVM0008662;EVM0000252;EVM0006216;EVM0006711;EVM0023317;EVM0018295;EVM0017024;EVM0017482
GO:0015833	peptide transport	0	biological_process	EVM0003283;EVM0019059;EVM0005554;EVM0013142;EVM0010865;EVM0012067;EVM0020503;EVM0010674;EVM0004184;EVM0002650;EVM0002319;EVM0009312;EVM0023313;EVM0000741;EVM0024064;EVM0008567;EVM0023989;EVM0017015;EVM0008366;EVM0005725;EVM0015217;EVM0007729;EVM0006139;EVM0015281;EVM0012170;EVM0008896;EVM0006083
GO:0006986	response to unfolded protein	0	biological_process	EVM0003283;EVM0003460;EVM0012067;EVM0019432;EVM0007950;EVM0005619;EVM0007729;EVM0015281
GO:0009123	nucleoside monophosphate metabolic process	0	biological_process	EVM0010959;EVM0000162;EVM0003283;EVM0014316;EVM0012067;EVM0019432;EVM0008114;EVM0010674;EVM0015439;EVM0006860;EVM0011776;EVM0023231;EVM0011390;EVM0019668;EVM0019286;EVM0005879;EVM0014049;EVM0010017;EVM0011386;EVM0008185;EVM0005725;EVM0007729;EVM0015281;EVM0013575;EVM0019863;EVM0006083
GO:0006970	response to osmotic stress	0	biological_process	EVM0003764;EVM0022547;EVM0008428;EVM0009837;EVM0015490;EVM0006954;EVM0012067;EVM0023248;EVM0004828;EVM0004184;EVM0006017;EVM0021375;EVM0014054;EVM0021002;EVM0024306;EVM0015699;EVM0009859;EVM0003666;EVM0009144;EVM0022208;EVM0006448;EVM0010366;EVM0008567;EVM0014427;EVM0017015;EVM0008597;EVM0007045;EVM0007047;EVM0015640;EVM0011111;EVM0005725;EVM0000299;EVM0007729;EVM0022776;EVM0021781;EVM0002960;EVM…
GO:0033036	macromolecule localization	0	biological_process	EVM0010431;EVM0003283;EVM0019059;EVM0003460;EVM0013142;EVM0010865;EVM0012067;EVM0008114;EVM0020503;EVM0010674;EVM0004184;EVM0002650;EVM0021375;EVM0002319;EVM0009312;EVM0023313;EVM0014021;EVM0019142;EVM0019668;EVM0019286;EVM0000741;EVM0024064;EVM0008567;EVM0023989;EVM0017015;EVM0008366;EVM0005725;EVM0015217;EVM0007729;EVM0006139;EVM0015281;EVM0012170;EVM0008896
GO:1901565	organonitrogen compound catabolic process	0	biological_process	EVM0010959;EVM0000162;EVM0003283;EVM0012067;EVM0019432;EVM0020662;EVM0008114;EVM0010674;EVM0015439;EVM0006860;EVM0011776;EVM0023231;EVM0019142;EVM0011390;EVM0019668;EVM0019286;EVM0005879;EVM0009715;EVM0014049;EVM0011386;EVM0008185;EVM0005725;EVM0007729;EVM0005980;EVM0015281;EVM0013575;EVM0019863;EVM0006083
GO:0016070	RNA metabolic process	0	biological_process	EVM0016827;EVM0023675;EVM0006441;EVM0010431;EVM0021361;EVM0013200;EVM0024555;EVM0003526;EVM0020662;EVM0008114;EVM0001180;EVM0008235;EVM0002650;EVM0021370;EVM0016615;EVM0006905;EVM0011776;EVM0014054;EVM0012962;EVM0013354;EVM0022236;EVM0005309;EVM0007250;EVM0015062;EVM0003939;EVM0005479;EVM0010888;EVM0008185;EVM0014419;EVM0005752;EVM0002803;EVM0019863
GO:0045184	establishment of protein localization	0	biological_process	EVM0003283;EVM0019059;EVM0013142;EVM0010865;EVM0012067;EVM0020503;EVM0010674;EVM0004184;EVM0002650;EVM0002319;EVM0009312;EVM0023313;EVM0000741;EVM0024064;EVM0008567;EVM0023989;EVM0017015;EVM0008366;EVM0005725;EVM0015217;EVM0007729;EVM0006139;EVM0015281;EVM0012170;EVM0008896
GO:0009150	purine ribonucleotide metabolic process	0	biological_process	EVM0010959;EVM0000162;EVM0003283;EVM0014316;EVM0012067;EVM0019432;EVM0020662;EVM0008114;EVM0010674;EVM0015439;EVM0006860;EVM0011776;EVM0023231;EVM0011390;EVM0019668;EVM0019286;EVM0005879;EVM0014049;EVM0010017;EVM0011386;EVM0008185;EVM0005725;EVM0007729;EVM0015281;EVM0013575;EVM0019863;EVM0006083
GO:0010608	posttranscriptional regulation of gene expression	0.002	biological_process	EVM0023675;EVM0010431;EVM0003283;EVM0021361;EVM0020160;EVM0003526;EVM0007887;EVM0008114;EVM0001180;EVM0002943;EVM0007250;EVM0023989;EVM0010888;EVM0018978;EVM0003978;EVM0015286;EVM0015281
GO:0035639	purine ribonucleoside triphosphate binding	0.002	molecular_function	EVM0015227;EVM0012067;EVM0008114;EVM0010674;EVM0021498;EVM0009637;EVM0002650;EVM0019668;EVM0020895;EVM0019286;EVM0010017;EVM0008366;EVM0008597;EVM0007047;EVM0011111;EVM0000299;EVM0007729;EVM0014635;EVM0012170;EVM0005161
GO:0016567	protein ubiquitination	0.002	biological_process	EVM0001082;EVM0011882;EVM0021086;EVM0021498;EVM0012449;EVM0013638;EVM0014242;EVM0012902;EVM0011127;EVM0024152;EVM0008662;EVM0000252;EVM0006216;EVM0006711;EVM0023317;EVM0018295;EVM0017024;EVM0017482
GO:0016441	posttranscriptional gene silencing	0.002	biological_process	EVM0023675;EVM0010431;EVM0003283;EVM0021361;EVM0003526;EVM0001180;EVM0007250;EVM0023989;EVM0010888;EVM0018978;EVM0003978;EVM0015281
GO:0009144	purine nucleoside triphosphate metabolic process	0.002	biological_process	EVM0010959;EVM0000162;EVM0003283;EVM0014316;EVM0012067;EVM0019432;EVM0020662;EVM0008114;EVM0010674;EVM0015439;EVM0006860;EVM0011776;EVM0023231;EVM0011390;EVM0019668;EVM0019286;EVM0005879;EVM0014049;EVM0010017;EVM0011386;EVM0008185;EVM0005725;EVM0007729;EVM0015281;EVM0013575;EVM0019863;EVM0006083
GO:0009205	purine ribonucleoside triphosphate metabolic process	0.002	biological_process	EVM0010959;EVM0000162;EVM0003283;EVM0014316;EVM0012067;EVM0019432;EVM0020662;EVM0008114;EVM0010674;EVM0015439;EVM0006860;EVM0011776;EVM0023231;EVM0011390;EVM0019668;EVM0019286;EVM0005879;EVM0014049;EVM0010017;EVM0011386;EVM0008185;EVM0005725;EVM0007729;EVM0015281;EVM0013575;EVM0019863;EVM0006083
GO:0046128	purine ribonucleoside metabolic process	0.002	biological_process	EVM0010959;EVM0000162;EVM0003283;EVM0012067;EVM0019432;EVM0020662;EVM0008114;EVM0010674;EVM0015439;EVM0006860;EVM0011776;EVM0023231;EVM0011390;EVM0019668;EVM0019286;EVM0005879;EVM0014049;EVM0010017;EVM0011386;EVM0008185;EVM0005725;EVM0007729;EVM0015281;EVM0013575;EVM0019863;EVM0006083
GO:0009199	ribonucleoside triphosphate metabolic process	0.002	biological_process	EVM0010959;EVM0000162;EVM0003283;EVM0014316;EVM0012067;EVM0019432;EVM0020662;EVM0008114;EVM0010674;EVM0015439;EVM0006860;EVM0011776;EVM0023231;EVM0011390;EVM0019668;EVM0019286;EVM0005879;EVM0014049;EVM0010017;EVM0011386;EVM0008185;EVM0005725;EVM0007729;EVM0015281;EVM0013575;EVM0019863;EVM0006083
GO:1901265	nucleoside phosphate binding	0.002	molecular_function	EVM0015227;EVM0010590;EVM0011369;EVM0012067;EVM0008114;EVM0010674;EVM0021498;EVM0009637;EVM0002650;EVM0019668;EVM0020895;EVM0019286;EVM0010017;EVM0008366;EVM0008597;EVM0007047;EVM0011111;EVM0000299;EVM0007729;EVM0014635;EVM0013645;EVM0012170;EVM0005161
GO:0000166	nucleotide binding	0.002	molecular_function	EVM0015227;EVM0010590;EVM0011369;EVM0012067;EVM0008114;EVM0010674;EVM0021498;EVM0009637;EVM0002650;EVM0019668;EVM0020895;EVM0019286;EVM0010017;EVM0008366;EVM0008597;EVM0007047;EVM0011111;EVM0000299;EVM0007729;EVM0014635;EVM0013645;EVM0012170;EVM0005161
GO:0031325	positive regulation of cellular metabolic process	0.002	biological_process	EVM0006441;EVM0003283;EVM0017298;EVM0023073;EVM0007731;EVM0015490;EVM0012067;EVM0019432;EVM0008114;EVM0002036;EVM0006905;EVM0022697;EVM0017312;EVM0017877;EVM0016772;EVM0008669;EVM0022208;EVM0012502;EVM0005725;EVM0005752;EVM0005619;EVM0001115;EVM0002705;EVM0007729;EVM0015281;EVM0012359
GO:0034613	cellular protein localization	0.002	biological_process	EVM0019059;EVM0013142;EVM0010865;EVM0012067;EVM0020503;EVM0010674;EVM0002650;EVM0002319;EVM0009312;EVM0023313;EVM0000741;EVM0024064;EVM0023989;EVM0008366;EVM0005725;EVM0015217;EVM0007729;EVM0006139;EVM0012170;EVM0008896
GO:0003723	RNA binding	0.002	molecular_function	EVM0010431;EVM0003460;EVM0020160;EVM0012067;EVM0020662;EVM0008114;EVM0004184;EVM0002650;EVM0016615;EVM0011776;EVM0014054;EVM0004372;EVM0013354;EVM0020895;EVM0007250;EVM0010017;EVM0005479;EVM0001879;EVM0023585;EVM0007045;EVM0007729;EVM0003583
GO:0042886	amide transport	0.002	biological_process	EVM0003283;EVM0019059;EVM0005554;EVM0013142;EVM0010865;EVM0012067;EVM0020503;EVM0010674;EVM0004184;EVM0002650;EVM0002319;EVM0009312;EVM0023313;EVM0000741;EVM0024064;EVM0008567;EVM0023989;EVM0017015;EVM0008366;EVM0005725;EVM0015217;EVM0007729;EVM0006139;EVM0015281;EVM0012170;EVM0019421;EVM0008896;EVM0006083
GO:0071806	protein transmembrane transport	0.002	biological_process	EVM0019059;EVM0012067;EVM0010674;EVM0002319;EVM0023313;EVM0024064;EVM0015217;EVM0007729;EVM0006139
GO:0065002	intracellular protein transmembrane transport	0.002	biological_process	EVM0019059;EVM0012067;EVM0010674;EVM0002319;EVM0023313;EVM0024064;EVM0015217;EVM0007729;EVM0006139
GO:0042278	purine nucleoside metabolic process	0.002	biological_process	EVM0010959;EVM0000162;EVM0003283;EVM0012067;EVM0019432;EVM0020662;EVM0008114;EVM0010674;EVM0015439;EVM0006860;EVM0011776;EVM0023231;EVM0011390;EVM0019668;EVM0019286;EVM0005879;EVM0014049;EVM0010017;EVM0011386;EVM0008185;EVM0005725;EVM0007729;EVM0015281;EVM0013575;EVM0019863;EVM0006083
GO:0009893	positive regulation of metabolic process	0.002	biological_process	EVM0006441;EVM0003283;EVM0017298;EVM0023073;EVM0007731;EVM0015490;EVM0007887;EVM0012067;EVM0019432;EVM0008114;EVM0002036;EVM0006905;EVM0022697;EVM0017312;EVM0017877;EVM0016772;EVM0008669;EVM0022208;EVM0012502;EVM0005725;EVM0005752;EVM0005619;EVM0001115;EVM0002705;EVM0007729;EVM0015281;EVM0012359
GO:0016458	gene silencing	0.002	biological_process	EVM0023675;EVM0010431;EVM0003283;EVM0021361;EVM0003526;EVM0001180;EVM0017877;EVM0007250;EVM0023989;EVM0010888;EVM0018978;EVM0003978;EVM0004207;EVM0015281;EVM0012359
GO:0003676	nucleic acid binding	0.002	molecular_function	EVM0006441;EVM0010431;EVM0017298;EVM0010590;EVM0003460;EVM0020160;EVM0015490;EVM0012067;EVM0020662;EVM0008114;EVM0004184;EVM0002650;EVM0016615;EVM0006905;EVM0011776;EVM0014054;EVM0022697;EVM0004372;EVM0013354;EVM0020895;EVM0013488;EVM0007250;EVM0010017;EVM0005479;EVM0010888;EVM0014427;EVM0001879;EVM0023585;EVM0007045;EVM0007823;EVM0005752;EVM0001115;EVM0002705;EVM0007729;EVM0003583;EVM0014351;EVM…
GO:0001883	purine nucleoside binding	0.002	molecular_function	EVM0015227;EVM0012067;EVM0008114;EVM0010674;EVM0021498;EVM0009637;EVM0002650;EVM0019668;EVM0020895;EVM0019286;EVM0010017;EVM0008366;EVM0008597;EVM0007047;EVM0011111;EVM0000299;EVM0007729;EVM0014635;EVM0012170;EVM0005161
GO:0032549	ribonucleoside binding	0.002	molecular_function	EVM0015227;EVM0012067;EVM0008114;EVM0010674;EVM0021498;EVM0009637;EVM0002650;EVM0019668;EVM0020895;EVM0019286;EVM0010017;EVM0008366;EVM0008597;EVM0007047;EVM0011111;EVM0000299;EVM0007729;EVM0014635;EVM0012170;EVM0005161
GO:0017076	purine nucleotide binding	0.002	molecular_function	EVM0015227;EVM0012067;EVM0008114;EVM0010674;EVM0021498;EVM0009637;EVM0002650;EVM0019668;EVM0020895;EVM0019286;EVM0010017;EVM0008366;EVM0008597;EVM0007047;EVM0011111;EVM0000299;EVM0007729;EVM0014635;EVM0012170;EVM0005161
GO:0001882	nucleoside binding	0.002	molecular_function	EVM0015227;EVM0012067;EVM0008114;EVM0010674;EVM0021498;EVM0009637;EVM0002650;EVM0019668;EVM0020895;EVM0019286;EVM0010017;EVM0008366;EVM0008597;EVM0007047;EVM0011111;EVM0000299;EVM0007729;EVM0014635;EVM0012170;EVM0005161
GO:0032555	purine ribonucleotide binding	0.002	molecular_function	EVM0015227;EVM0012067;EVM0008114;EVM0010674;EVM0021498;EVM0009637;EVM0002650;EVM0019668;EVM0020895;EVM0019286;EVM0010017;EVM0008366;EVM0008597;EVM0007047;EVM0011111;EVM0000299;EVM0007729;EVM0014635;EVM0012170;EVM0005161
GO:0032550	purine ribonucleoside binding	0.002	molecular_function	EVM0015227;EVM0012067;EVM0008114;EVM0010674;EVM0021498;EVM0009637;EVM0002650;EVM0019668;EVM0020895;EVM0019286;EVM0010017;EVM0008366;EVM0008597;EVM0007047;EVM0011111;EVM0000299;EVM0007729;EVM0014635;EVM0012170;EVM0005161
GO:0005774	vacuolar membrane	0.002	cellular_component	EVM0016559;EVM0015227;EVM0022547;EVM0016210;EVM0022382;EVM0023801;EVM0024650;EVM0024425;EVM0008764;EVM0010865;EVM0012628;EVM0013685;EVM0010674;EVM0021498;EVM0024003;EVM0003252;EVM0020551;EVM0006860;EVM0020437;EVM0014754;EVM0019142;EVM0003037;EVM0015677;EVM0004839;EVM0022549;EVM0008567;EVM0011337;EVM0017015;EVM0008597;EVM0007047;EVM0022141;EVM0016164;EVM0011111;EVM0000299;EVM0000146;EVM0015217;EVM…
GO:0046907	intracellular transport	0.002	biological_process	EVM0010431;EVM0021117;EVM0019059;EVM0003460;EVM0013142;EVM0010865;EVM0012067;EVM0020503;EVM0010674;EVM0002650;EVM0002319;EVM0009312;EVM0023313;EVM0000741;EVM0024064;EVM0023989;EVM0008366;EVM0005725;EVM0015217;EVM0007729;EVM0006139;EVM0012170;EVM0008896
GO:1901363	heterocyclic compound binding	0.002	molecular_function	EVM0015227;EVM0006441;EVM0010431;EVM0017298;EVM0010590;EVM0003460;EVM0020160;EVM0011369;EVM0015490;EVM0012067;EVM0020662;EVM0008114;EVM0010674;EVM0021498;EVM0004184;EVM0009637;EVM0002650;EVM0016615;EVM0006905;EVM0011776;EVM0014054;EVM0022697;EVM0004372;EVM0013354;EVM0019668;EVM0020895;EVM0019286;EVM0013488;EVM0007250;EVM0010017;EVM0005479;EVM0010888;EVM0014427;EVM0001879;EVM0023585;EVM0008366;EVM…
GO:2000026	regulation of multicellular organismal development	0.002	biological_process	EVM0003283;EVM0023073;EVM0007731;EVM0008309;EVM0011882;EVM0012067;EVM0005326;EVM0019432;EVM0023248;EVM0002036;EVM0016969;EVM0015946;EVM0002650;EVM0014754;EVM0004372;EVM0018997;EVM0001669;EVM0021489;EVM0023101;EVM0016059;EVM0008567;EVM0010888;EVM0017015;EVM0007823;EVM0005752;EVM0007729;EVM0015281;EVM0017806;EVM0016092
GO:0010035	response to inorganic substance	0.002	biological_process	EVM0013186;EVM0003764;EVM0000162;EVM0015227;EVM0015798;EVM0003460;EVM0022547;EVM0008305;EVM0011369;EVM0007887;EVM0006954;EVM0003824;EVM0002075;EVM0004853;EVM0021498;EVM0004184;EVM0009637;EVM0024003;EVM0015439;EVM0021375;EVM0006860;EVM0017982;EVM0007120;EVM0014242;EVM0014054;EVM0016332;EVM0007444;EVM0000327;EVM0014754;EVM0021002;EVM0015699;EVM0017383;EVM0003835;EVM0017312;EVM0011127;EVM0009859;EVM…
GO:0009166	nucleotide catabolic process	0.002	biological_process	EVM0010959;EVM0000162;EVM0003283;EVM0012067;EVM0019432;EVM0020662;EVM0008114;EVM0010674;EVM0015439;EVM0006860;EVM0011776;EVM0023231;EVM0011390;EVM0019668;EVM0019286;EVM0005879;EVM0014049;EVM0011386;EVM0008185;EVM0005725;EVM0007729;EVM0015281;EVM0013575;EVM0019863;EVM0006083
GO:0009143	nucleoside triphosphate catabolic process	0.002	biological_process	EVM0010959;EVM0000162;EVM0003283;EVM0012067;EVM0019432;EVM0020662;EVM0008114;EVM0010674;EVM0015439;EVM0006860;EVM0011776;EVM0023231;EVM0011390;EVM0019668;EVM0019286;EVM0005879;EVM0014049;EVM0011386;EVM0008185;EVM0005725;EVM0007729;EVM0015281;EVM0013575;EVM0019863;EVM0006083
GO:0009146	purine nucleoside triphosphate catabolic process	0.002	biological_process	EVM0010959;EVM0000162;EVM0003283;EVM0012067;EVM0019432;EVM0020662;EVM0008114;EVM0010674;EVM0015439;EVM0006860;EVM0011776;EVM0023231;EVM0011390;EVM0019668;EVM0019286;EVM0005879;EVM0014049;EVM0011386;EVM0008185;EVM0005725;EVM0007729;EVM0015281;EVM0013575;EVM0019863;EVM0006083
GO:0009261	ribonucleotide catabolic process	0.002	biological_process	EVM0010959;EVM0000162;EVM0003283;EVM0012067;EVM0019432;EVM0020662;EVM0008114;EVM0010674;EVM0015439;EVM0006860;EVM0011776;EVM0023231;EVM0011390;EVM0019668;EVM0019286;EVM0005879;EVM0014049;EVM0011386;EVM0008185;EVM0005725;EVM0007729;EVM0015281;EVM0013575;EVM0019863;EVM0006083
GO:0009207	purine ribonucleoside triphosphate catabolic process	0.002	biological_process	EVM0010959;EVM0000162;EVM0003283;EVM0012067;EVM0019432;EVM0020662;EVM0008114;EVM0010674;EVM0015439;EVM0006860;EVM0011776;EVM0023231;EVM0011390;EVM0019668;EVM0019286;EVM0005879;EVM0014049;EVM0011386;EVM0008185;EVM0005725;EVM0007729;EVM0015281;EVM0013575;EVM0019863;EVM0006083
GO:0009203	ribonucleoside triphosphate catabolic process	0.002	biological_process	EVM0010959;EVM0000162;EVM0003283;EVM0012067;EVM0019432;EVM0020662;EVM0008114;EVM0010674;EVM0015439;EVM0006860;EVM0011776;EVM0023231;EVM0011390;EVM0019668;EVM0019286;EVM0005879;EVM0014049;EVM0011386;EVM0008185;EVM0005725;EVM0007729;EVM0015281;EVM0013575;EVM0019863;EVM0006083
GO:1901292	nucleoside phosphate catabolic process	0.002	biological_process	EVM0010959;EVM0000162;EVM0003283;EVM0012067;EVM0019432;EVM0020662;EVM0008114;EVM0010674;EVM0015439;EVM0006860;EVM0011776;EVM0023231;EVM0011390;EVM0019668;EVM0019286;EVM0005879;EVM0014049;EVM0011386;EVM0008185;EVM0005725;EVM0007729;EVM0015281;EVM0013575;EVM0019863;EVM0006083
GO:0009154	purine ribonucleotide catabolic process	0.002	biological_process	EVM0010959;EVM0000162;EVM0003283;EVM0012067;EVM0019432;EVM0020662;EVM0008114;EVM0010674;EVM0015439;EVM0006860;EVM0011776;EVM0023231;EVM0011390;EVM0019668;EVM0019286;EVM0005879;EVM0014049;EVM0011386;EVM0008185;EVM0005725;EVM0007729;EVM0015281;EVM0013575;EVM0019863;EVM0006083
GO:0006195	purine nucleotide catabolic process	0.002	biological_process	EVM0010959;EVM0000162;EVM0003283;EVM0012067;EVM0019432;EVM0020662;EVM0008114;EVM0010674;EVM0015439;EVM0006860;EVM0011776;EVM0023231;EVM0011390;EVM0019668;EVM0019286;EVM0005879;EVM0014049;EVM0011386;EVM0008185;EVM0005725;EVM0007729;EVM0015281;EVM0013575;EVM0019863;EVM0006083
GO:0006163	purine nucleotide metabolic process	0.002	biological_process	EVM0010959;EVM0000162;EVM0003283;EVM0014316;EVM0012067;EVM0019432;EVM0020662;EVM0008114;EVM0010674;EVM0015439;EVM0006860;EVM0011776;EVM0023231;EVM0011390;EVM0019668;EVM0019286;EVM0005879;EVM0014049;EVM0010017;EVM0011386;EVM0008185;EVM0005725;EVM0007729;EVM0015281;EVM0013575;EVM0019863;EVM0006083
GO:0009141	nucleoside triphosphate metabolic process	0.002	biological_process	EVM0010959;EVM0000162;EVM0003283;EVM0014316;EVM0012067;EVM0019432;EVM0020662;EVM0008114;EVM0010674;EVM0015439;EVM0006860;EVM0011776;EVM0023231;EVM0011390;EVM0019668;EVM0019286;EVM0005879;EVM0014049;EVM0010017;EVM0011386;EVM0008185;EVM0005725;EVM0007729;EVM0015281;EVM0013575;EVM0019863;EVM0006083
GO:0042542	response to hydrogen peroxide	0.002	biological_process	EVM0013186;EVM0015798;EVM0003460;EVM0006954;EVM0004853;EVM0021498;EVM0017982;EVM0021002;EVM0017383;EVM0009859;EVM0008247;EVM0006448;EVM0015640;EVM0005619;EVM0021781
GO:0019439	aromatic compound catabolic process	0.002	biological_process	EVM0010959;EVM0000162;EVM0003283;EVM0013200;EVM0003526;EVM0012067;EVM0019432;EVM0020662;EVM0008114;EVM0010674;EVM0015439;EVM0006860;EVM0011776;EVM0023231;EVM0019142;EVM0011390;EVM0019668;EVM0019286;EVM0005879;EVM0014049;EVM0003939;EVM0011386;EVM0008185;EVM0005725;EVM0007729;EVM0015281;EVM0013575;EVM0019863;EVM0006083
GO:0009506	plasmodesma	0.002	cellular_component	EVM0000845;EVM0005267;EVM0016559;EVM0019769;EVM0004150;EVM0010590;EVM0022547;EVM0016210;EVM0019937;EVM0018179;EVM0023801;EVM0003526;EVM0024425;EVM0012628;EVM0001416;EVM0011681;EVM0006166;EVM0004184;EVM0009637;EVM0019267;EVM0003493;EVM0024003;EVM0015439;EVM0020551;EVM0014242;EVM0011486;EVM0013470;EVM0020437;EVM0014754;EVM0002825;EVM0009456;EVM0001669;EVM0023877;EVM0008247;EVM0012434;EVM0024153;EVM…
GO:0055044	symplast	0.002	cellular_component	EVM0000845;EVM0005267;EVM0016559;EVM0019769;EVM0004150;EVM0010590;EVM0022547;EVM0016210;EVM0019937;EVM0018179;EVM0023801;EVM0003526;EVM0024425;EVM0012628;EVM0001416;EVM0011681;EVM0006166;EVM0004184;EVM0009637;EVM0019267;EVM0003493;EVM0024003;EVM0015439;EVM0020551;EVM0014242;EVM0011486;EVM0013470;EVM0020437;EVM0014754;EVM0002825;EVM0009456;EVM0001669;EVM0023877;EVM0008247;EVM0012434;EVM0024153;EVM…
GO:0098805	whole membrane	0.002	cellular_component	EVM0016559;EVM0015227;EVM0008639;EVM0022547;EVM0003945;EVM0016210;EVM0022382;EVM0023801;EVM0024650;EVM0008309;EVM0024425;EVM0008764;EVM0010865;EVM0012628;EVM0013685;EVM0003852;EVM0020503;EVM0010674;EVM0021498;EVM0024003;EVM0003252;EVM0020551;EVM0006860;EVM0009312;EVM0000862;EVM0020437;EVM0014754;EVM0019142;EVM0011390;EVM0003037;EVM0017383;EVM0015677;EVM0004839;EVM0006094;EVM0022549;EVM0008567;EVM…
GO:0019538	protein metabolic process	0.002	biological_process	EVM0001082;EVM0016559;EVM0000162;EVM0006441;EVM0003283;EVM0010590;EVM0023073;EVM0003460;EVM0020160;EVM0022138;EVM0007731;EVM0008309;EVM0015490;EVM0011882;EVM0021086;EVM0006954;EVM0012067;EVM0019432;EVM0020662;EVM0008114;EVM0016732;EVM0016969;EVM0010674;EVM0021498;EVM0012449;EVM0006017;EVM0002650;EVM0013638;EVM0006905;EVM0007120;EVM0014242;EVM0021002;EVM0022697;EVM0024306;EVM0019668;EVM0012902;EVM…
GO:0016818	hydrolase activity, acting on acid anhydrides, in phosphorus-containing anhydrides	0.002	molecular_function	EVM0010959;EVM0000162;EVM0003283;EVM0012067;EVM0019432;EVM0020662;EVM0008114;EVM0010674;EVM0015439;EVM0006860;EVM0011776;EVM0023231;EVM0011390;EVM0019668;EVM0019286;EVM0005879;EVM0014049;EVM0011386;EVM0008185;EVM0015972;EVM0005725;EVM0007729;EVM0015281;EVM0013575;EVM0019863;EVM0006083
GO:0016462	pyrophosphatase activity	0.002	molecular_function	EVM0010959;EVM0000162;EVM0003283;EVM0012067;EVM0019432;EVM0020662;EVM0008114;EVM0010674;EVM0015439;EVM0006860;EVM0011776;EVM0023231;EVM0011390;EVM0019668;EVM0019286;EVM0005879;EVM0014049;EVM0011386;EVM0008185;EVM0015972;EVM0005725;EVM0007729;EVM0015281;EVM0013575;EVM0019863;EVM0006083
GO:0034655	nucleobase-containing compound catabolic process	0.002	biological_process	EVM0010959;EVM0000162;EVM0003283;EVM0013200;EVM0003526;EVM0012067;EVM0019432;EVM0020662;EVM0008114;EVM0010674;EVM0015439;EVM0006860;EVM0011776;EVM0023231;EVM0011390;EVM0019668;EVM0019286;EVM0005879;EVM0014049;EVM0003939;EVM0011386;EVM0008185;EVM0005725;EVM0007729;EVM0015281;EVM0013575;EVM0019863;EVM0006083
GO:0005911	cell-cell junction	0.002	cellular_component	EVM0000845;EVM0005267;EVM0016559;EVM0019769;EVM0004150;EVM0010590;EVM0022547;EVM0016210;EVM0019937;EVM0018179;EVM0023801;EVM0003526;EVM0024425;EVM0012628;EVM0001416;EVM0011681;EVM0006166;EVM0004184;EVM0009637;EVM0019267;EVM0003493;EVM0024003;EVM0015439;EVM0020551;EVM0014242;EVM0011486;EVM0013470;EVM0020437;EVM0014754;EVM0002825;EVM0009456;EVM0001669;EVM0023877;EVM0008247;EVM0012434;EVM0024153;EVM…
GO:0031981	nuclear lumen	0.002	cellular_component	EVM0016559;EVM0023675;EVM0006441;EVM0021117;EVM0019769;EVM0021361;EVM0000022;EVM0023801;EVM0011313;EVM0011366;EVM0024420;EVM0007887;EVM0013331;EVM0020662;EVM0022341;EVM0008114;EVM0010674;EVM0015946;EVM0020683;EVM0001180;EVM0019267;EVM0012306;EVM0024003;EVM0003252;EVM0020551;EVM0023287;EVM0006905;EVM0011776;EVM0014754;EVM0022697;EVM0013354;EVM0022236;EVM0018033;EVM0016576;EVM0001202;EVM0023101;EVM…
GO:0044437	vacuolar part	0.002	cellular_component	EVM0016559;EVM0015227;EVM0022547;EVM0016210;EVM0022382;EVM0023801;EVM0024650;EVM0024425;EVM0008764;EVM0010865;EVM0012628;EVM0013685;EVM0010674;EVM0021498;EVM0024003;EVM0003252;EVM0020551;EVM0006860;EVM0020437;EVM0014754;EVM0019142;EVM0003037;EVM0015677;EVM0004839;EVM0022549;EVM0008567;EVM0011337;EVM0017015;EVM0008597;EVM0007047;EVM0022141;EVM0016164;EVM0011111;EVM0000299;EVM0000146;EVM0015217;EVM…
GO:0009266	response to temperature stimulus	0.002	biological_process	EVM0013186;EVM0008058;EVM0016555;EVM0003764;EVM0015227;EVM0015798;EVM0003283;EVM0003460;EVM0013984;EVM0016210;EVM0023801;EVM0015490;EVM0006954;EVM0012067;EVM0004828;EVM0010674;EVM0004853;EVM0021498;EVM0008235;EVM0009637;EVM0021375;EVM0017982;EVM0014054;EVM0014754;EVM0021002;EVM0023304;EVM0002943;EVM0019668;EVM0017312;EVM0009859;EVM0019286;EVM0013488;EVM0008247;EVM0023101;EVM0006448;EVM0008567;EVM…
GO:0006996	organelle organization	0.002	biological_process	EVM0006276;EVM0000162;EVM0015227;EVM0006441;EVM0019769;EVM0003283;EVM0019059;EVM0010590;EVM0023073;EVM0003460;EVM0000022;EVM0024650;EVM0022138;EVM0007731;EVM0008309;EVM0011366;EVM0010865;EVM0012067;EVM0020662;EVM0016969;EVM0010674;EVM0023340;EVM0020116;EVM0002319;EVM0014054;EVM0023313;EVM0017130;EVM0022697;EVM0020895;EVM0005879;EVM0012360;EVM0024064;EVM0010888;EVM0014427;EVM0005715;EVM0008185;EVM…
GO:0030054	cell junction	0.002	cellular_component	EVM0000845;EVM0005267;EVM0016559;EVM0019769;EVM0004150;EVM0010590;EVM0022547;EVM0016210;EVM0019937;EVM0018179;EVM0023801;EVM0003526;EVM0024425;EVM0012628;EVM0001416;EVM0011681;EVM0006166;EVM0004184;EVM0009637;EVM0019267;EVM0003493;EVM0024003;EVM0015439;EVM0020551;EVM0014242;EVM0011486;EVM0013470;EVM0020437;EVM0014754;EVM0002825;EVM0009456;EVM0001669;EVM0023877;EVM0008247;EVM0012434;EVM0024153;EVM…
GO:0044428	nuclear part	0.002	cellular_component	EVM0016559;EVM0023675;EVM0006441;EVM0010431;EVM0021117;EVM0019769;EVM0021361;EVM0000022;EVM0023801;EVM0011313;EVM0011366;EVM0024420;EVM0007887;EVM0013331;EVM0020662;EVM0022341;EVM0008114;EVM0010674;EVM0015946;EVM0004184;EVM0020683;EVM0001180;EVM0019267;EVM0002650;EVM0012306;EVM0024003;EVM0003252;EVM0020551;EVM0023287;EVM0006905;EVM0011776;EVM0014754;EVM0022697;EVM0013354;EVM0019668;EVM0022236;EVM…
GO:0017111	nucleoside-triphosphatase activity	0.002	molecular_function	EVM0010959;EVM0000162;EVM0003283;EVM0012067;EVM0019432;EVM0020662;EVM0008114;EVM0010674;EVM0015439;EVM0006860;EVM0011776;EVM0023231;EVM0011390;EVM0019668;EVM0019286;EVM0005879;EVM0014049;EVM0011386;EVM0008185;EVM0005725;EVM0007729;EVM0015281;EVM0013575;EVM0019863;EVM0006083
GO:0009259	ribonucleotide metabolic process	0.002	biological_process	EVM0010959;EVM0000162;EVM0003283;EVM0014316;EVM0012067;EVM0019432;EVM0020662;EVM0008114;EVM0010674;EVM0015439;EVM0006860;EVM0011776;EVM0023231;EVM0011390;EVM0019668;EVM0019286;EVM0005879;EVM0014049;EVM0010017;EVM0011386;EVM0008185;EVM0005725;EVM0007729;EVM0015281;EVM0013575;EVM0019863;EVM0006083
GO:0009116	nucleoside metabolic process	0.002	biological_process	EVM0010959;EVM0000162;EVM0003283;EVM0012067;EVM0019432;EVM0020662;EVM0008114;EVM0010674;EVM0015439;EVM0006860;EVM0011776;EVM0023231;EVM0011390;EVM0019668;EVM0019286;EVM0005879;EVM0014049;EVM0010017;EVM0011386;EVM0008185;EVM0005725;EVM0007729;EVM0015281;EVM0013575;EVM0019863;EVM0006083
GO:0009119	ribonucleoside metabolic process	0.002	biological_process	EVM0010959;EVM0000162;EVM0003283;EVM0012067;EVM0019432;EVM0020662;EVM0008114;EVM0010674;EVM0015439;EVM0006860;EVM0011776;EVM0023231;EVM0011390;EVM0019668;EVM0019286;EVM0005879;EVM0014049;EVM0010017;EVM0011386;EVM0008185;EVM0005725;EVM0007729;EVM0015281;EVM0013575;EVM0019863;EVM0006083
GO:0097159	organic cyclic compound binding	0.002	molecular_function	EVM0015227;EVM0006441;EVM0010431;EVM0017298;EVM0010590;EVM0003460;EVM0020160;EVM0008309;EVM0011369;EVM0015490;EVM0012067;EVM0020662;EVM0008114;EVM0010674;EVM0021498;EVM0004184;EVM0009637;EVM0002650;EVM0016615;EVM0006905;EVM0011776;EVM0014054;EVM0022697;EVM0004372;EVM0013354;EVM0019668;EVM0020895;EVM0019286;EVM0013488;EVM0007250;EVM0010017;EVM0005479;EVM0010888;EVM0014427;EVM0001879;EVM0023585;EVM…
GO:0031982	vesicle	0.002	cellular_component	EVM0008639;EVM0003283;EVM0003283;EVM0001748;EVM0001748;EVM0008309;EVM0010865;EVM0012628;EVM0012067;EVM0012067;EVM0019432;EVM0019432;EVM0003852;EVM0003852;EVM0010674;EVM0010674;EVM0015536;EVM0009312;EVM0000862;EVM0000862;EVM0020437;EVM0020437;EVM0011390;EVM0021578;EVM0001669;EVM0001669;EVM0011199;EVM0006216;EVM0018091;EVM0007768;EVM0015972;EVM0024534;EVM0024534;EVM0007729;EVM0007729;EVM0015281;EVM…
GO:0043412	macromolecule modification	0.002	biological_process	EVM0001082;EVM0016559;EVM0016827;EVM0006441;EVM0010590;EVM0023073;EVM0021361;EVM0022138;EVM0007731;EVM0008309;EVM0015490;EVM0011882;EVM0021086;EVM0012067;EVM0016732;EVM0016969;EVM0021498;EVM0012449;EVM0006017;EVM0013638;EVM0006905;EVM0014242;EVM0022697;EVM0024306;EVM0012902;EVM0011127;EVM0017877;EVM0019450;EVM0011199;EVM0008404;EVM0023101;EVM0024152;EVM0008669;EVM0008662;EVM0014448;EVM0022208;EVM…
GO:0031974	membrane-enclosed lumen	0.002	cellular_component	EVM0016559;EVM0023675;EVM0015227;EVM0006441;EVM0021117;EVM0019769;EVM0003283;EVM0021361;EVM0022547;EVM0000022;EVM0023801;EVM0011313;EVM0011366;EVM0024420;EVM0007887;EVM0013331;EVM0019432;EVM0020662;EVM0022341;EVM0008114;EVM0010674;EVM0015946;EVM0020683;EVM0001180;EVM0019267;EVM0012306;EVM0024003;EVM0003252;EVM0020551;EVM0023287;EVM0006905;EVM0020150;EVM0011776;EVM0007120;EVM0014754;EVM0022697;EVM…
GO:0070013	intracellular organelle lumen	0.002	cellular_component	EVM0016559;EVM0023675;EVM0015227;EVM0006441;EVM0021117;EVM0019769;EVM0003283;EVM0021361;EVM0022547;EVM0000022;EVM0023801;EVM0011313;EVM0011366;EVM0024420;EVM0007887;EVM0013331;EVM0019432;EVM0020662;EVM0022341;EVM0008114;EVM0010674;EVM0015946;EVM0020683;EVM0001180;EVM0019267;EVM0012306;EVM0024003;EVM0003252;EVM0020551;EVM0023287;EVM0006905;EVM0020150;EVM0011776;EVM0007120;EVM0014754;EVM0022697;EVM…
GO:0043233	organelle lumen	0.002	cellular_component	EVM0016559;EVM0023675;EVM0015227;EVM0006441;EVM0021117;EVM0019769;EVM0003283;EVM0021361;EVM0022547;EVM0000022;EVM0023801;EVM0011313;EVM0011366;EVM0024420;EVM0007887;EVM0013331;EVM0019432;EVM0020662;EVM0022341;EVM0008114;EVM0010674;EVM0015946;EVM0020683;EVM0001180;EVM0019267;EVM0012306;EVM0024003;EVM0003252;EVM0020551;EVM0023287;EVM0006905;EVM0020150;EVM0011776;EVM0007120;EVM0014754;EVM0022697;EVM…
GO:0006979	response to oxidative stress	0.002	biological_process	EVM0013186;EVM0015798;EVM0003460;EVM0022547;EVM0008428;EVM0006954;EVM0004853;EVM0021498;EVM0017982;EVM0021002;EVM0017383;EVM0003626;EVM0019668;EVM0007884;EVM0009859;EVM0020266;EVM0019286;EVM0006094;EVM0008247;EVM0006448;EVM0007047;EVM0015640;EVM0011111;EVM0005619;EVM0001115;EVM0002705;EVM0021781;EVM0022508
GO:1902578	single-organism localization	0.002	biological_process	EVM0000162;EVM0021117;EVM0003283;EVM0019059;EVM0003460;EVM0004109;EVM0005554;EVM0013142;EVM0010865;EVM0002453;EVM0012067;EVM0019432;EVM0013685;EVM0023248;EVM0022534;EVM0020503;EVM0010674;EVM0004184;EVM0002650;EVM0015439;EVM0015536;EVM0021375;EVM0002319;EVM0006860;EVM0023313;EVM0023231;EVM0011486;EVM0014021;EVM0019142;EVM0011390;EVM0002825;EVM0015677;EVM0000963;EVM0001669;EVM0000741;EVM0022208;EVM…
GO:0051234	establishment of localization	0.002	biological_process	EVM0000162;EVM0010431;EVM0021117;EVM0003283;EVM0019059;EVM0003460;EVM0004109;EVM0020165;EVM0005554;EVM0013142;EVM0010865;EVM0002453;EVM0012067;EVM0019432;EVM0013685;EVM0023248;EVM0022534;EVM0020503;EVM0010674;EVM0004184;EVM0002650;EVM0015439;EVM0015536;EVM0021375;EVM0002319;EVM0006860;EVM0009312;EVM0023313;EVM0023231;EVM0011486;EVM0007444;EVM0014021;EVM0020437;EVM0019142;EVM0011390;EVM0002825;EVM…
GO:0042026	protein refolding	0.002	biological_process	EVM0012067;EVM0010674;EVM0019668;EVM0019286;EVM0005725;EVM0007729
GO:0031047	gene silencing by RNA	0.002	biological_process	EVM0023675;EVM0010431;EVM0003283;EVM0021361;EVM0003526;EVM0001180;EVM0007250;EVM0023989;EVM0010888;EVM0018978;EVM0003978;EVM0015281
GO:0048518	positive regulation of biological process	0.002	biological_process	EVM0006441;EVM0010431;EVM0003283;EVM0017298;EVM0023073;EVM0007731;EVM0008309;EVM0015490;EVM0007887;EVM0012067;EVM0019432;EVM0008114;EVM0002036;EVM0002650;EVM0021375;EVM0016615;EVM0006905;EVM0022697;EVM0012902;EVM0017312;EVM0012288;EVM0017877;EVM0016772;EVM0008669;EVM0022208;EVM0008184;EVM0012502;EVM0003115;EVM0005725;EVM0005752;EVM0005619;EVM0001115;EVM0002705;EVM0007729;EVM0015286;EVM0015281;EVM…
GO:0071840	cellular component organization or biogenesis	0.002	biological_process	EVM0016559;EVM0006276;EVM0000162;EVM0015227;EVM0006441;EVM0019769;EVM0003283;EVM0019059;EVM0004150;EVM0010590;EVM0023073;EVM0003460;EVM0001748;EVM0000022;EVM0024650;EVM0022138;EVM0007731;EVM0008309;EVM0013142;EVM0011366;EVM0007887;EVM0010865;EVM0006954;EVM0012067;EVM0020662;EVM0003824;EVM0021236;EVM0008114;EVM0016969;EVM0010674;EVM0003493;EVM0002650;EVM0023340;EVM0020116;EVM0021375;EVM0021370;EVM…
GO:0005488	binding	0.002	molecular_function	EVM0010959;EVM0015227;EVM0006441;EVM0010431;EVM0003283;EVM0017298;EVM0010590;EVM0003460;EVM0022547;EVM0020160;EVM0023801;EVM0011317;EVM0008309;EVM0011369;EVM0015490;EVM0012067;EVM0019432;EVM0020662;EVM0008114;EVM0010674;EVM0021498;EVM0004184;EVM0009637;EVM0002650;EVM0015439;EVM0016615;EVM0006905;EVM0011776;EVM0014054;EVM0016332;EVM0017130;EVM0014021;EVM0022697;EVM0004372;EVM0013354;EVM0019668;EVM…
GO:0016043	cellular component organization	0.002	biological_process	EVM0016559;EVM0006276;EVM0000162;EVM0015227;EVM0006441;EVM0019769;EVM0003283;EVM0019059;EVM0004150;EVM0010590;EVM0023073;EVM0003460;EVM0001748;EVM0000022;EVM0024650;EVM0022138;EVM0007731;EVM0008309;EVM0013142;EVM0011366;EVM0010865;EVM0006954;EVM0012067;EVM0020662;EVM0003824;EVM0021236;EVM0008114;EVM0016969;EVM0010674;EVM0003493;EVM0002650;EVM0023340;EVM0020116;EVM0021375;EVM0002319;EVM0020093;EVM…
GO:0009892	negative regulation of metabolic process	0.002	biological_process	EVM0019582;EVM0009694;EVM0023675;EVM0010431;EVM0003283;EVM0021361;EVM0020160;EVM0013200;EVM0003526;EVM0012067;EVM0008114;EVM0010674;EVM0001180;EVM0017877;EVM0013488;EVM0007250;EVM0003939;EVM0023989;EVM0010888;EVM0014427;EVM0018978;EVM0007823;EVM0003978;EVM0005752;EVM0004207;EVM0007729;EVM0015286;EVM0015281;EVM0012359;EVM0022508
GO:0004842	ubiquitin-protein transferase activity	0.002	molecular_function	EVM0001082;EVM0021086;EVM0012449;EVM0013638;EVM0014242;EVM0012902;EVM0011127;EVM0024152;EVM0008662;EVM0000252;EVM0006216;EVM0006711;EVM0023317;EVM0018295;EVM0017024;EVM0017482
GO:0043234	protein complex	0.002	cellular_component	EVM0016559;EVM0023675;EVM0006441;EVM0010431;EVM0003283;EVM0004150;EVM0021361;EVM0003418;EVM0020160;EVM0008309;EVM0011882;EVM0024420;EVM0012067;EVM0019432;EVM0008114;EVM0014780;EVM0010674;EVM0006166;EVM0015946;EVM0002650;EVM0006905;EVM0023313;EVM0022697;EVM0019668;EVM0022236;EVM0008858;EVM0019286;EVM0000741;EVM0001202;EVM0016059;EVM0022708;EVM0022952;EVM0011797;EVM0015062;EVM0024064;EVM0010017;EVM…
GO:0071702	organic substance transport	0.002	biological_process	EVM0010431;EVM0003283;EVM0019059;EVM0003460;EVM0005554;EVM0013142;EVM0010865;EVM0012067;EVM0020503;EVM0010674;EVM0004184;EVM0002650;EVM0002319;EVM0009312;EVM0023313;EVM0014021;EVM0019142;EVM0000963;EVM0000741;EVM0024064;EVM0008567;EVM0023989;EVM0017015;EVM0008366;EVM0007950;EVM0005725;EVM0015217;EVM0007729;EVM0006139;EVM0015281;EVM0012170;EVM0019421;EVM0008896;EVM0006083
GO:0048519	negative regulation of biological process	0.002	biological_process	EVM0019582;EVM0009694;EVM0023675;EVM0006441;EVM0010431;EVM0003283;EVM0023073;EVM0021361;EVM0004109;EVM0020160;EVM0013200;EVM0003526;EVM0007731;EVM0008309;EVM0011882;EVM0008764;EVM0012067;EVM0019432;EVM0021236;EVM0008114;EVM0023248;EVM0002036;EVM0010674;EVM0001180;EVM0002650;EVM0021375;EVM0019929;EVM0014754;EVM0019142;EVM0017877;EVM0013488;EVM0023101;EVM0016059;EVM0007250;EVM0003939;EVM0006216;EVM…
GO:0006464	cellular protein modification process	0.002	biological_process	EVM0001082;EVM0016559;EVM0006441;EVM0010590;EVM0023073;EVM0022138;EVM0007731;EVM0008309;EVM0015490;EVM0011882;EVM0021086;EVM0012067;EVM0016732;EVM0016969;EVM0021498;EVM0012449;EVM0006017;EVM0013638;EVM0006905;EVM0014242;EVM0022697;EVM0024306;EVM0012902;EVM0011127;EVM0019450;EVM0011199;EVM0008404;EVM0023101;EVM0024152;EVM0008669;EVM0008662;EVM0014448;EVM0022208;EVM0000252;EVM0006216;EVM0020030;EVM…
GO:0036211	protein modification process	0.002	biological_process	EVM0001082;EVM0016559;EVM0006441;EVM0010590;EVM0023073;EVM0022138;EVM0007731;EVM0008309;EVM0015490;EVM0011882;EVM0021086;EVM0012067;EVM0016732;EVM0016969;EVM0021498;EVM0012449;EVM0006017;EVM0013638;EVM0006905;EVM0014242;EVM0022697;EVM0024306;EVM0012902;EVM0011127;EVM0019450;EVM0011199;EVM0008404;EVM0023101;EVM0024152;EVM0008669;EVM0008662;EVM0014448;EVM0022208;EVM0000252;EVM0006216;EVM0020030;EVM…
GO:0010038	response to metal ion	0.002	biological_process	EVM0013186;EVM0003764;EVM0000162;EVM0015227;EVM0022547;EVM0008305;EVM0011369;EVM0007887;EVM0003824;EVM0002075;EVM0021498;EVM0004184;EVM0009637;EVM0024003;EVM0021375;EVM0006860;EVM0017982;EVM0007120;EVM0014242;EVM0016332;EVM0007444;EVM0000327;EVM0014754;EVM0015699;EVM0003835;EVM0017312;EVM0005239;EVM0008247;EVM0016059;EVM0010017;EVM0008567;EVM0017015;EVM0008366;EVM0008597;EVM0007047;EVM0011111;EVM…
GO:0032991	macromolecular complex	0.002	cellular_component	EVM0016559;EVM0023675;EVM0015227;EVM0006441;EVM0010431;EVM0003283;EVM0004150;EVM0021361;EVM0003418;EVM0020160;EVM0013200;EVM0003526;EVM0008309;EVM0011882;EVM0024420;EVM0007887;EVM0012067;EVM0019432;EVM0020662;EVM0008114;EVM0014780;EVM0010674;EVM0006166;EVM0015946;EVM0002650;EVM0003252;EVM0020551;EVM0006905;EVM0011776;EVM0023313;EVM0021717;EVM0014754;EVM0022697;EVM0019668;EVM0022236;EVM0008858;EVM…
GO:0016817	hydrolase activity, acting on acid anhydrides	0.002	molecular_function	EVM0010959;EVM0000162;EVM0003283;EVM0012067;EVM0019432;EVM0020662;EVM0008114;EVM0010674;EVM0015439;EVM0006860;EVM0011776;EVM0023231;EVM0011390;EVM0019668;EVM0019286;EVM0005879;EVM0014049;EVM0011386;EVM0008185;EVM0015972;EVM0005725;EVM0007729;EVM0015281;EVM0013575;EVM0019863;EVM0006083
GO:0005829	cytosol	0.002	cellular_component	EVM0015227;EVM0006441;EVM0010431;EVM0021117;EVM0003168;EVM0004150;EVM0012513;EVM0003460;EVM0001748;EVM0008127;EVM0018887;EVM0018280;EVM0000022;EVM0014316;EVM0019937;EVM0018179;EVM0023801;EVM0009837;EVM0003526;EVM0008305;EVM0013142;EVM0011882;EVM0007887;EVM0002950;EVM0012067;EVM0020662;EVM0022341;EVM0017147;EVM0008114;EVM0002075;EVM0016732;EVM0010674;EVM0010884;EVM0021498;EVM0004184;EVM0009637;EVM…
GO:0042221	response to chemical	0.002	biological_process	EVM0013186;EVM0001903;EVM0009694;EVM0003764;EVM0000162;EVM0015227;EVM0015798;EVM0010431;EVM0003283;EVM0003460;EVM0022313;EVM0021361;EVM0022547;EVM0009837;EVM0009831;EVM0003526;EVM0008309;EVM0008305;EVM0011369;EVM0011882;EVM0007887;EVM0006954;EVM0012067;EVM0019432;EVM0003824;EVM0008114;EVM0002075;EVM0023248;EVM0004853;EVM0021498;EVM0004184;EVM0001180;EVM0009637;EVM0024003;EVM0015439;EVM0021375;EVM…
GO:0031410	cytoplasmic vesicle	0.002	cellular_component	EVM0008639;EVM0003283;EVM0003283;EVM0001748;EVM0001748;EVM0008309;EVM0010865;EVM0012628;EVM0012067;EVM0012067;EVM0019432;EVM0019432;EVM0003852;EVM0003852;EVM0010674;EVM0010674;EVM0015536;EVM0009312;EVM0000862;EVM0000862;EVM0020437;EVM0020437;EVM0011390;EVM0021578;EVM0011199;EVM0006216;EVM0018091;EVM0007768;EVM0015972;EVM0024534;EVM0024534;EVM0007729;EVM0007729;EVM0015281;EVM0015281;EVM0018065;EVM…
GO:0019693	ribose phosphate metabolic process	0.002	biological_process	EVM0010959;EVM0000162;EVM0003283;EVM0014316;EVM0012067;EVM0019432;EVM0020662;EVM0008114;EVM0010674;EVM0015439;EVM0006860;EVM0011776;EVM0023231;EVM0011390;EVM0019668;EVM0019286;EVM0005879;EVM0014049;EVM0010017;EVM0011386;EVM0008185;EVM0005725;EVM0007729;EVM0015281;EVM0013575;EVM0019863;EVM0006083
GO:0009651	response to salt stress	0.002	biological_process	EVM0022547;EVM0008428;EVM0009837;EVM0015490;EVM0006954;EVM0012067;EVM0023248;EVM0004184;EVM0006017;EVM0021375;EVM0014054;EVM0021002;EVM0024306;EVM0015699;EVM0009859;EVM0003666;EVM0009144;EVM0022208;EVM0006448;EVM0010366;EVM0008567;EVM0014427;EVM0017015;EVM0008597;EVM0007045;EVM0007047;EVM0015640;EVM0011111;EVM0000299;EVM0007729;EVM0022776;EVM0002960;EVM0013575;EVM0022508
GO:0051179	localization	0.002	biological_process	EVM0000162;EVM0010431;EVM0021117;EVM0003283;EVM0019059;EVM0003460;EVM0004109;EVM0020165;EVM0005554;EVM0013142;EVM0010865;EVM0002453;EVM0012067;EVM0019432;EVM0013685;EVM0008114;EVM0023248;EVM0022534;EVM0020503;EVM0010674;EVM0004184;EVM0002650;EVM0015439;EVM0015536;EVM0021375;EVM0002319;EVM0006860;EVM0006905;EVM0009312;EVM0023313;EVM0023231;EVM0011486;EVM0007444;EVM0014021;EVM0020437;EVM0019142;EVM…
GO:0035966	response to topologically incorrect protein	0.002	biological_process	EVM0003283;EVM0003460;EVM0012067;EVM0019432;EVM0007950;EVM0005619;EVM0007729;EVM0015281
GO:0007275	multicellular organism development	0.002	biological_process	EVM0019582;EVM0000162;EVM0006441;EVM0010431;EVM0021182;EVM0003283;EVM0004150;EVM0010590;EVM0021555;EVM0001748;EVM0004109;EVM0003418;EVM0022547;EVM0022138;EVM0007731;EVM0008309;EVM0013142;EVM0011366;EVM0011882;EVM0007887;EVM0010865;EVM0012067;EVM0019432;EVM0020662;EVM0022341;EVM0013685;EVM0021236;EVM0008114;EVM0014780;EVM0016969;EVM0000733;EVM0010674;EVM0015946;EVM0004184;EVM0002650;EVM0012306;EVM…
GO:0006810	transport	0.002	biological_process	EVM0000162;EVM0010431;EVM0021117;EVM0003283;EVM0019059;EVM0003460;EVM0004109;EVM0020165;EVM0005554;EVM0013142;EVM0010865;EVM0002453;EVM0012067;EVM0019432;EVM0013685;EVM0023248;EVM0022534;EVM0020503;EVM0010674;EVM0004184;EVM0002650;EVM0015439;EVM0015536;EVM0021375;EVM0002319;EVM0006860;EVM0009312;EVM0023313;EVM0023231;EVM0011486;EVM0007444;EVM0014021;EVM0020437;EVM0019142;EVM0011390;EVM0002825;EVM…
GO:0044260	cellular macromolecule metabolic process	0.002	biological_process	EVM0001082;EVM0016559;EVM0016827;EVM0023675;EVM0000162;EVM0006441;EVM0010431;EVM0003283;EVM0010590;EVM0023073;EVM0003460;EVM0021361;EVM0013984;EVM0020160;EVM0013200;EVM0024555;EVM0003526;EVM0022138;EVM0007731;EVM0008309;EVM0015490;EVM0011882;EVM0021086;EVM0006954;EVM0012067;EVM0019432;EVM0020662;EVM0003824;EVM0008114;EVM0016732;EVM0016969;EVM0010674;EVM0021498;EVM0001180;EVM0008235;EVM0012449;EVM…
GO:0048731	system development	0.002	biological_process	EVM0019582;EVM0000162;EVM0003283;EVM0004150;EVM0010590;EVM0021555;EVM0001748;EVM0004109;EVM0003418;EVM0022138;EVM0007731;EVM0008309;EVM0011882;EVM0007887;EVM0010865;EVM0012067;EVM0019432;EVM0022341;EVM0021236;EVM0008114;EVM0016969;EVM0000733;EVM0015946;EVM0002650;EVM0012306;EVM0020116;EVM0021375;EVM0002319;EVM0006905;EVM0023231;EVM0018450;EVM0011486;EVM0011078;EVM0003100;EVM0022697;EVM0011390;EVM…
GO:0044267	cellular protein metabolic process	0.002	biological_process	EVM0001082;EVM0016559;EVM0000162;EVM0006441;EVM0003283;EVM0010590;EVM0023073;EVM0003460;EVM0020160;EVM0022138;EVM0007731;EVM0008309;EVM0015490;EVM0011882;EVM0021086;EVM0006954;EVM0012067;EVM0019432;EVM0020662;EVM0008114;EVM0016732;EVM0016969;EVM0010674;EVM0021498;EVM0012449;EVM0006017;EVM0002650;EVM0013638;EVM0006905;EVM0014242;EVM0021002;EVM0022697;EVM0024306;EVM0019668;EVM0012902;EVM0011127;EVM…
GO:0009628	response to abiotic stimulus	0.002	biological_process	EVM0013186;EVM0008058;EVM0016555;EVM0003764;EVM0015227;EVM0015798;EVM0003283;EVM0010590;EVM0003460;EVM0013984;EVM0022547;EVM0016210;EVM0008428;EVM0023801;EVM0009837;EVM0003526;EVM0005554;EVM0008309;EVM0015490;EVM0011882;EVM0010865;EVM0006954;EVM0012067;EVM0023248;EVM0004828;EVM0010674;EVM0004853;EVM0021498;EVM0004184;EVM0008235;EVM0009637;EVM0006017;EVM0015439;EVM0021375;EVM0017982;EVM0014054;EVM…
GO:0034641	cellular nitrogen compound metabolic process	0.002	biological_process	EVM0010959;EVM0016827;EVM0023675;EVM0000162;EVM0006441;EVM0010431;EVM0003283;EVM0021361;EVM0013984;EVM0020160;EVM0014316;EVM0013200;EVM0024555;EVM0003526;EVM0020541;EVM0011882;EVM0012067;EVM0019432;EVM0020662;EVM0008114;EVM0010674;EVM0001180;EVM0008235;EVM0002650;EVM0015439;EVM0021370;EVM0016615;EVM0006860;EVM0006905;EVM0011776;EVM0014054;EVM0023231;EVM0012962;EVM0019142;EVM0011390;EVM0013354;EVM…
GO:0006139	nucleobase-containing compound metabolic process	0.002	biological_process	EVM0010959;EVM0016827;EVM0023675;EVM0000162;EVM0006441;EVM0010431;EVM0003283;EVM0021361;EVM0013984;EVM0014316;EVM0013200;EVM0024555;EVM0003526;EVM0020541;EVM0011882;EVM0012067;EVM0019432;EVM0020662;EVM0008114;EVM0010674;EVM0001180;EVM0008235;EVM0002650;EVM0015439;EVM0021370;EVM0016615;EVM0006860;EVM0006905;EVM0011776;EVM0014054;EVM0023231;EVM0012962;EVM0011390;EVM0013354;EVM0019668;EVM0022236;EVM…
GO:0032501	multicellular organismal process	0.002	biological_process	EVM0019582;EVM0000162;EVM0006441;EVM0010431;EVM0021182;EVM0003283;EVM0004150;EVM0010590;EVM0021555;EVM0001748;EVM0004109;EVM0003418;EVM0022547;EVM0008428;EVM0022138;EVM0007731;EVM0008309;EVM0013142;EVM0011366;EVM0011882;EVM0007887;EVM0010865;EVM0012067;EVM0019432;EVM0020662;EVM0022341;EVM0013685;EVM0021236;EVM0008114;EVM0023248;EVM0014780;EVM0016969;EVM0000733;EVM0010674;EVM0015946;EVM0004184;EVM…
GO:0044765	single-organism transport	0.002	biological_process	EVM0000162;EVM0021117;EVM0003283;EVM0019059;EVM0003460;EVM0004109;EVM0005554;EVM0013142;EVM0010865;EVM0002453;EVM0012067;EVM0019432;EVM0013685;EVM0023248;EVM0022534;EVM0020503;EVM0010674;EVM0004184;EVM0002650;EVM0015439;EVM0015536;EVM0021375;EVM0002319;EVM0006860;EVM0023313;EVM0023231;EVM0011486;EVM0014021;EVM0019142;EVM0011390;EVM0002825;EVM0015677;EVM0000963;EVM0001669;EVM0000741;EVM0022208;EVM…
GO:0044707	single-multicellular organism process	0.002	biological_process	EVM0019582;EVM0000162;EVM0006441;EVM0010431;EVM0021182;EVM0003283;EVM0004150;EVM0010590;EVM0021555;EVM0001748;EVM0004109;EVM0003418;EVM0022547;EVM0022138;EVM0007731;EVM0008309;EVM0013142;EVM0011366;EVM0011882;EVM0007887;EVM0010865;EVM0012067;EVM0019432;EVM0020662;EVM0022341;EVM0013685;EVM0021236;EVM0008114;EVM0023248;EVM0014780;EVM0016969;EVM0000733;EVM0010674;EVM0015946;EVM0004184;EVM0003493;EVM…
GO:0005730	nucleolus	0.002	cellular_component	EVM0016559;EVM0019769;EVM0021361;EVM0023801;EVM0011313;EVM0011366;EVM0007887;EVM0022341;EVM0010674;EVM0020683;EVM0001180;EVM0019267;EVM0012306;EVM0024003;EVM0003252;EVM0020551;EVM0023287;EVM0011776;EVM0014754;EVM0018033;EVM0022952;EVM0011797;EVM0005309;EVM0015062;EVM0010017;EVM0010888;EVM0001874;EVM0019983;EVM0012502;EVM0014766;EVM0004207;EVM0008709;EVM0002803;EVM0016092
GO:0009790	embryo development	0.002	biological_process	EVM0019582;EVM0006441;EVM0010431;EVM0021182;EVM0003283;EVM0021555;EVM0004109;EVM0003418;EVM0011882;EVM0010865;EVM0012067;EVM0020662;EVM0008114;EVM0015946;EVM0002650;EVM0012306;EVM0020116;EVM0002319;EVM0006905;EVM0007691;EVM0001669;EVM0012360;EVM0003939;EVM0008185;EVM0019124;EVM0005752;EVM0001830;EVM0015217;EVM0007729;EVM0014635;EVM0015281;EVM0021600;EVM0017154;EVM0008896
GO:0032502	developmental process	0.002	biological_process	EVM0019582;EVM0016559;EVM0000162;EVM0006441;EVM0010431;EVM0021182;EVM0003283;EVM0004150;EVM0010590;EVM0021555;EVM0001748;EVM0004109;EVM0003418;EVM0022547;EVM0008428;EVM0022138;EVM0007731;EVM0008309;EVM0013142;EVM0011366;EVM0011882;EVM0007887;EVM0010865;EVM0012067;EVM0019432;EVM0020662;EVM0022341;EVM0003824;EVM0013685;EVM0021236;EVM0008114;EVM0014780;EVM0016969;EVM0000733;EVM0010674;EVM0015946;EVM…
GO:0043170	macromolecule metabolic process	0.002	biological_process	EVM0001082;EVM0016559;EVM0016827;EVM0023675;EVM0000162;EVM0006441;EVM0010431;EVM0003283;EVM0010590;EVM0023073;EVM0003460;EVM0021361;EVM0013984;EVM0020160;EVM0013200;EVM0024555;EVM0003526;EVM0022138;EVM0007731;EVM0020541;EVM0008309;EVM0015490;EVM0011882;EVM0021086;EVM0006954;EVM0012067;EVM0019432;EVM0020662;EVM0003824;EVM0008114;EVM0016732;EVM0016969;EVM0010674;EVM0021498;EVM0001180;EVM0008235;EVM…
GO:0006725	cellular aromatic compound metabolic process	0.002	biological_process	EVM0010959;EVM0016827;EVM0023675;EVM0000162;EVM0006441;EVM0010431;EVM0003283;EVM0021361;EVM0013984;EVM0014316;EVM0013200;EVM0024555;EVM0003526;EVM0020541;EVM0011882;EVM0024420;EVM0012067;EVM0019432;EVM0020662;EVM0008114;EVM0010674;EVM0001180;EVM0008235;EVM0002650;EVM0015439;EVM0021370;EVM0016615;EVM0006860;EVM0006905;EVM0011776;EVM0014054;EVM0023231;EVM0012962;EVM0019142;EVM0011390;EVM0013354;EVM…
GO:0098588	bounding membrane of organelle	0.002	cellular_component	EVM0016559;EVM0006276;EVM0015227;EVM0008639;EVM0022547;EVM0003945;EVM0016210;EVM0022382;EVM0023801;EVM0024650;EVM0008309;EVM0024425;EVM0008764;EVM0010865;EVM0012628;EVM0013685;EVM0003852;EVM0020503;EVM0010674;EVM0021498;EVM0024003;EVM0003252;EVM0020551;EVM0006860;EVM0009312;EVM0000862;EVM0020437;EVM0014754;EVM0019142;EVM0011390;EVM0003037;EVM0017383;EVM0015677;EVM0020266;EVM0004839;EVM0006094;EVM…
GO:0090304	nucleic acid metabolic process	0.002	biological_process	EVM0016827;EVM0023675;EVM0006441;EVM0010431;EVM0021361;EVM0013984;EVM0013200;EVM0024555;EVM0003526;EVM0020541;EVM0011882;EVM0020662;EVM0008114;EVM0001180;EVM0008235;EVM0002650;EVM0021370;EVM0016615;EVM0006905;EVM0011776;EVM0014054;EVM0012962;EVM0013354;EVM0022236;EVM0017877;EVM0022708;EVM0024152;EVM0005309;EVM0007250;EVM0015062;EVM0003939;EVM0005479;EVM0010888;EVM0014427;EVM0008185;EVM0005725;EVM…
GO:0016881	acid-amino acid ligase activity	0.002	molecular_function	EVM0001082;EVM0021086;EVM0012449;EVM0013638;EVM0014242;EVM0012902;EVM0011127;EVM0023101;EVM0024152;EVM0008662;EVM0000252;EVM0006216;EVM0006711;EVM0023317;EVM0018295;EVM0017024;EVM0017482
GO:0048856	anatomical structure development	0.002	biological_process	EVM0019582;EVM0016559;EVM0000162;EVM0006441;EVM0010431;EVM0021182;EVM0003283;EVM0004150;EVM0010590;EVM0021555;EVM0001748;EVM0004109;EVM0003418;EVM0022547;EVM0008428;EVM0022138;EVM0007731;EVM0008309;EVM0013142;EVM0011366;EVM0011882;EVM0007887;EVM0010865;EVM0012067;EVM0019432;EVM0020662;EVM0022341;EVM0003824;EVM0013685;EVM0021236;EVM0008114;EVM0014780;EVM0016969;EVM0000733;EVM0010674;EVM0015946;EVM…
GO:0048523	negative regulation of cellular process	0.002	biological_process	EVM0019582;EVM0009694;EVM0006441;EVM0010431;EVM0003283;EVM0004109;EVM0020160;EVM0008309;EVM0008764;EVM0012067;EVM0019432;EVM0021236;EVM0008114;EVM0023248;EVM0010674;EVM0002650;EVM0019929;EVM0017877;EVM0013488;EVM0007250;EVM0006216;EVM0023989;EVM0010888;EVM0014427;EVM0018978;EVM0007823;EVM0003978;EVM0005752;EVM0004207;EVM0007729;EVM0015286;EVM0015281;EVM0012359;EVM0022508
GO:0033674	positive regulation of kinase activity	0.002	biological_process	EVM0003283;EVM0015490;EVM0012067;EVM0019432;EVM0008669;EVM0022208;EVM0007729;EVM0015281
GO:0045860	positive regulation of protein kinase activity	0.002	biological_process	EVM0003283;EVM0015490;EVM0012067;EVM0019432;EVM0008669;EVM0022208;EVM0007729;EVM0015281
GO:0044767	single-organism developmental process	0.002	biological_process	EVM0019582;EVM0016559;EVM0000162;EVM0006441;EVM0010431;EVM0021182;EVM0003283;EVM0004150;EVM0010590;EVM0021555;EVM0001748;EVM0004109;EVM0003418;EVM0022547;EVM0022138;EVM0007731;EVM0008309;EVM0013142;EVM0011366;EVM0011882;EVM0007887;EVM0010865;EVM0012067;EVM0019432;EVM0020662;EVM0022341;EVM0003824;EVM0013685;EVM0021236;EVM0008114;EVM0014780;EVM0016969;EVM0000733;EVM0010674;EVM0015946;EVM0004184;EVM…
GO:0044238	primary metabolic process	0.002	biological_process	EVM0001082;EVM0016559;EVM0010959;EVM0016827;EVM0023675;EVM0000162;EVM0006441;EVM0010431;EVM0003283;EVM0019059;EVM0010590;EVM0023073;EVM0003460;EVM0001748;EVM0021361;EVM0013984;EVM0020160;EVM0014316;EVM0013200;EVM0024555;EVM0003526;EVM0022138;EVM0007731;EVM0020541;EVM0008309;EVM0015490;EVM0011882;EVM0008764;EVM0021086;EVM0006954;EVM0012067;EVM0019432;EVM0020662;EVM0003824;EVM0008114;EVM0016732;EVM…
GO:1901657	glycosyl compound metabolic process	0.002	biological_process	EVM0010959;EVM0000162;EVM0003283;EVM0012067;EVM0019432;EVM0020662;EVM0008114;EVM0010674;EVM0015439;EVM0006860;EVM0011776;EVM0023231;EVM0019142;EVM0011390;EVM0019668;EVM0019286;EVM0005879;EVM0014049;EVM0010017;EVM0011386;EVM0008185;EVM0005725;EVM0007729;EVM0015281;EVM0013575;EVM0019863;EVM0006083
GO:0043167	ion binding	0.002	molecular_function	EVM0015227;EVM0003283;EVM0022547;EVM0023801;EVM0011317;EVM0011369;EVM0012067;EVM0019432;EVM0008114;EVM0010674;EVM0021498;EVM0009637;EVM0002650;EVM0015439;EVM0016332;EVM0014021;EVM0019668;EVM0017312;EVM0020895;EVM0019286;EVM0008247;EVM0009715;EVM0010017;EVM0009564;EVM0014427;EVM0008366;EVM0008597;EVM0007045;EVM0007047;EVM0011111;EVM0000299;EVM0007729;EVM0014635;EVM0015281;EVM0013645;EVM0007064;EVM…
GO:0050793	regulation of developmental process	0.002	biological_process	EVM0019582;EVM0010431;EVM0003283;EVM0023073;EVM0004109;EVM0007731;EVM0008309;EVM0011882;EVM0012067;EVM0005326;EVM0019432;EVM0021236;EVM0023248;EVM0002036;EVM0016969;EVM0015946;EVM0002650;EVM0014754;EVM0004372;EVM0018997;EVM0001669;EVM0021489;EVM0023101;EVM0016059;EVM0008567;EVM0010888;EVM0017015;EVM0007823;EVM0005752;EVM0007729;EVM0015281;EVM0017806;EVM0016092
GO:0071704	organic substance metabolic process	0.002	biological_process	EVM0001082;EVM0016559;EVM0010959;EVM0016827;EVM0023675;EVM0000162;EVM0006441;EVM0010431;EVM0003283;EVM0019059;EVM0010590;EVM0023073;EVM0003460;EVM0001748;EVM0021361;EVM0013984;EVM0020160;EVM0014316;EVM0013200;EVM0024555;EVM0003526;EVM0022138;EVM0007731;EVM0020541;EVM0008309;EVM0015490;EVM0011882;EVM0024420;EVM0008764;EVM0021086;EVM0006954;EVM0012067;EVM0019432;EVM0020662;EVM0003824;EVM0008114;EVM…
GO:0005634	nucleus	0.002	cellular_component	EVM0013186;EVM0001082;EVM0016559;EVM0009694;EVM0023675;EVM0006441;EVM0010431;EVM0022077;EVM0021117;EVM0019769;EVM0003283;EVM0009602;EVM0012513;EVM0017298;EVM0010590;EVM0003460;EVM0021555;EVM0002649;EVM0001748;EVM0021361;EVM0004109;EVM0008127;EVM0013984;EVM0000022;EVM0006307;EVM0014086;EVM0009490;EVM0019937;EVM0009115;EVM0000338;EVM0023801;EVM0011313;EVM0022138;EVM0007731;EVM0020541;EVM0010960;EVM…
GO:0072521	purine-containing compound metabolic process	0.002	biological_process	EVM0010959;EVM0000162;EVM0003283;EVM0014316;EVM0012067;EVM0019432;EVM0020662;EVM0008114;EVM0010674;EVM0015439;EVM0006860;EVM0011776;EVM0023231;EVM0011390;EVM0019668;EVM0019286;EVM0005879;EVM0014049;EVM0010017;EVM0011386;EVM0008185;EVM0005725;EVM0007729;EVM0015281;EVM0013575;EVM0019863;EVM0006083
GO:0006950	response to stress	0.004	biological_process	EVM0013186;EVM0008058;EVM0016555;EVM0003764;EVM0015227;EVM0015798;EVM0006441;EVM0022077;EVM0003283;EVM0003460;EVM0013984;EVM0022547;EVM0016210;EVM0008428;EVM0000338;EVM0023801;EVM0009837;EVM0009831;EVM0003526;EVM0015490;EVM0011882;EVM0007887;EVM0010865;EVM0006954;EVM0012067;EVM0019432;EVM0003824;EVM0008114;EVM0023248;EVM0004828;EVM0010674;EVM0004853;EVM0021498;EVM0004184;EVM0001180;EVM0008235;EVM…
GO:0044446	intracellular organelle part	0.004	cellular_component	EVM0008058;EVM0016559;EVM0010959;EVM0006276;EVM0023675;EVM0000162;EVM0015227;EVM0006441;EVM0005216;EVM0010431;EVM0008639;EVM0021117;EVM0019769;EVM0011866;EVM0003283;EVM0001748;EVM0021361;EVM0022547;EVM0003945;EVM0016210;EVM0000022;EVM0022382;EVM0023801;EVM0009426;EVM0024555;EVM0011313;EVM0024650;EVM0011317;EVM0007731;EVM0008309;EVM0024425;EVM0011369;EVM0011366;EVM0024420;EVM0007887;EVM0013331;EVM…
GO:0044422	organelle part	0.004	cellular_component	EVM0008058;EVM0016559;EVM0010959;EVM0006276;EVM0023675;EVM0000162;EVM0015227;EVM0006441;EVM0005216;EVM0010431;EVM0008639;EVM0021117;EVM0019769;EVM0011866;EVM0003283;EVM0001748;EVM0021361;EVM0022547;EVM0003945;EVM0016210;EVM0000022;EVM0022382;EVM0023801;EVM0009426;EVM0024555;EVM0011313;EVM0024650;EVM0011317;EVM0007731;EVM0008309;EVM0024425;EVM0011369;EVM0011366;EVM0024420;EVM0007887;EVM0013331;EVM…
GO:0009987	cellular process	0.004	biological_process	EVM0019582;EVM0001082;EVM0016559;EVM0016555;EVM0010959;EVM0016827;EVM0006276;EVM0023675;EVM0000162;EVM0015227;EVM0006441;EVM0010431;EVM0021117;EVM0019769;EVM0003283;EVM0019059;EVM0004150;EVM0010590;EVM0023073;EVM0003460;EVM0001748;EVM0021361;EVM0004109;EVM0013984;EVM0003418;EVM0000022;EVM0020160;EVM0014316;EVM0013200;EVM0009831;EVM0024555;EVM0003526;EVM0024650;EVM0022138;EVM0007731;EVM0020541;EVM…
GO:0046483	heterocycle metabolic process	0.004	biological_process	EVM0010959;EVM0016827;EVM0023675;EVM0000162;EVM0006441;EVM0010431;EVM0003283;EVM0021361;EVM0013984;EVM0014316;EVM0013200;EVM0024555;EVM0003526;EVM0020541;EVM0011882;EVM0012067;EVM0019432;EVM0020662;EVM0008114;EVM0010674;EVM0001180;EVM0008235;EVM0002650;EVM0015439;EVM0021370;EVM0016615;EVM0006860;EVM0006905;EVM0011776;EVM0014054;EVM0023231;EVM0012962;EVM0019142;EVM0011390;EVM0013354;EVM0019668;EVM…
GO:0050896	response to stimulus	0.004	biological_process	EVM0013186;EVM0001903;EVM0008058;EVM0009694;EVM0016555;EVM0003764;EVM0000162;EVM0015227;EVM0015798;EVM0006441;EVM0010431;EVM0022077;EVM0003283;EVM0010590;EVM0003460;EVM0022313;EVM0021361;EVM0013984;EVM0022547;EVM0016210;EVM0008428;EVM0000338;EVM0023801;EVM0009837;EVM0009831;EVM0003526;EVM0005554;EVM0008309;EVM0008305;EVM0011369;EVM0015490;EVM0011882;EVM0007887;EVM0010865;EVM0006954;EVM0012067;EVM…
GO:1901575	organic substance catabolic process	0.004	biological_process	EVM0001082;EVM0010959;EVM0000162;EVM0003283;EVM0019059;EVM0014316;EVM0013200;EVM0003526;EVM0012067;EVM0019432;EVM0020662;EVM0008114;EVM0010674;EVM0015439;EVM0013638;EVM0006860;EVM0011776;EVM0023231;EVM0019142;EVM0011390;EVM0019668;EVM0019286;EVM0001199;EVM0005879;EVM0024152;EVM0009715;EVM0014049;EVM0003939;EVM0006711;EVM0011386;EVM0023317;EVM0008185;EVM0005725;EVM0018295;EVM0007729;EVM0005980;EVM…
GO:0044237	cellular metabolic process	0.004	biological_process	EVM0001082;EVM0016559;EVM0010959;EVM0016827;EVM0023675;EVM0000162;EVM0006441;EVM0010431;EVM0003283;EVM0019059;EVM0004150;EVM0010590;EVM0023073;EVM0003460;EVM0001748;EVM0021361;EVM0013984;EVM0020160;EVM0014316;EVM0013200;EVM0024555;EVM0003526;EVM0022138;EVM0007731;EVM0020541;EVM0008309;EVM0015490;EVM0011882;EVM0024420;EVM0008764;EVM0021086;EVM0006954;EVM0012067;EVM0019432;EVM0020662;EVM0003824;EVM…
GO:0044743	protein transmembrane import into intracellular organelle	0.004	biological_process	EVM0019059;EVM0012067;EVM0002319;EVM0023313;EVM0024064;EVM0015217;EVM0007729;EVM0006139
GO:0044763	single-organism cellular process	0.01	biological_process	EVM0019582;EVM0016559;EVM0010959;EVM0006276;EVM0023675;EVM0000162;EVM0015227;EVM0006441;EVM0010431;EVM0021117;EVM0019769;EVM0003283;EVM0019059;EVM0004150;EVM0010590;EVM0023073;EVM0003460;EVM0001748;EVM0021361;EVM0004109;EVM0013984;EVM0003418;EVM0000022;EVM0014316;EVM0009831;EVM0003526;EVM0024650;EVM0022138;EVM0007731;EVM0008309;EVM0013142;EVM0011366;EVM0015490;EVM0011882;EVM0024420;EVM0007887;EVM…
GO:2000113	negative regulation of cellular macromolecule biosynthetic process	0.01	biological_process	EVM0019582;EVM0009694;EVM0010431;EVM0020160;EVM0008114;EVM0010674;EVM0017877;EVM0013488;EVM0007250;EVM0023989;EVM0010888;EVM0014427;EVM0018978;EVM0007823;EVM0003978;EVM0004207;EVM0015286;EVM0012359;EVM0022508
GO:0010558	negative regulation of macromolecule biosynthetic process	0.01	biological_process	EVM0019582;EVM0009694;EVM0010431;EVM0020160;EVM0008114;EVM0010674;EVM0017877;EVM0013488;EVM0007250;EVM0023989;EVM0010888;EVM0014427;EVM0018978;EVM0007823;EVM0003978;EVM0004207;EVM0015286;EVM0012359;EVM0022508
GO:0006807	nitrogen compound metabolic process	0.01	biological_process	EVM0010959;EVM0016827;EVM0023675;EVM0000162;EVM0006441;EVM0010431;EVM0003283;EVM0021361;EVM0013984;EVM0020160;EVM0014316;EVM0013200;EVM0024555;EVM0003526;EVM0020541;EVM0011882;EVM0012067;EVM0019432;EVM0020662;EVM0008114;EVM0010674;EVM0001180;EVM0008235;EVM0002650;EVM0015439;EVM0021370;EVM0016615;EVM0006860;EVM0006905;EVM0011776;EVM0014054;EVM0023231;EVM0012962;EVM0019142;EVM0011390;EVM0013354;EVM…
GO:0044699	single-organism process	0.01	biological_process	EVM0019582;EVM0016559;EVM0010959;EVM0006276;EVM0023675;EVM0000162;EVM0015227;EVM0006441;EVM0010431;EVM0021117;EVM0019769;EVM0021182;EVM0003283;EVM0019059;EVM0004150;EVM0010590;EVM0023073;EVM0003460;EVM0021555;EVM0001748;EVM0021361;EVM0004109;EVM0013984;EVM0003418;EVM0022547;EVM0000022;EVM0014316;EVM0008428;EVM0009831;EVM0003526;EVM0024650;EVM0022138;EVM0007731;EVM0005554;EVM0008309;EVM0013142;EVM…
GO:0035195	gene silencing by miRNA	0.01	biological_process	EVM0010431;EVM0007250;EVM0023989;EVM0010888;EVM0018978;EVM0003978
GO:0008150	biological_process	0.01	biological_process	EVM0013186;EVM0001903;EVM0019582;EVM0001084;EVM0001082;EVM0008058;EVM0016559;EVM0009694;EVM0016555;EVM0010959;EVM0016827;EVM0006276;EVM0023675;EVM0003764;EVM0000162;EVM0015227;EVM0015798;EVM0006441;EVM0010431;EVM0022077;EVM0021117;EVM0019769;EVM0021182;EVM0003283;EVM0019059;EVM0004150;EVM0017298;EVM0010590;EVM0023073;EVM0003460;EVM0022313;EVM0021555;EVM0002649;EVM0001748;EVM0021361;EVM0004109;EVM…
GO:0005622	intracellular	0.01	cellular_component	EVM0000845;EVM0013186;EVM0001640;EVM0001084;EVM0001082;EVM0008058;EVM0016559;EVM0009694;EVM0016555;EVM0010959;EVM0016827;EVM0006276;EVM0023675;EVM0003764;EVM0000162;EVM0015497;EVM0000609;EVM0024451;EVM0015227;EVM0015798;EVM0006441;EVM0005216;EVM0010431;EVM0022077;EVM0008639;EVM0019764;EVM0021117;EVM0019769;EVM0011866;EVM0003283;EVM0003168;EVM0009602;EVM0019059;EVM0004150;EVM0012513;EVM0017298;EVM…
GO:0044424	intracellular part	0.01	cellular_component	EVM0000845;EVM0013186;EVM0001640;EVM0001084;EVM0001082;EVM0008058;EVM0016559;EVM0009694;EVM0016555;EVM0010959;EVM0016827;EVM0006276;EVM0023675;EVM0003764;EVM0000162;EVM0015497;EVM0000609;EVM0024451;EVM0015227;EVM0015798;EVM0006441;EVM0005216;EVM0010431;EVM0022077;EVM0008639;EVM0019764;EVM0021117;EVM0019769;EVM0011866;EVM0003283;EVM0003168;EVM0009602;EVM0019059;EVM0004150;EVM0012513;EVM0017298;EVM…
GO:0043229	intracellular organelle	0.01	cellular_component	EVM0000845;EVM0013186;EVM0001640;EVM0001084;EVM0001082;EVM0008058;EVM0016559;EVM0009694;EVM0016555;EVM0010959;EVM0016827;EVM0006276;EVM0023675;EVM0003764;EVM0000162;EVM0015497;EVM0024451;EVM0015227;EVM0006441;EVM0005216;EVM0010431;EVM0022077;EVM0008639;EVM0019764;EVM0021117;EVM0019769;EVM0011866;EVM0003283;EVM0009602;EVM0012513;EVM0017298;EVM0010590;EVM0003460;EVM0016865;EVM0021555;EVM0002649;EVM…
GO:0043226	organelle	0.01	cellular_component	EVM0000845;EVM0013186;EVM0001640;EVM0001084;EVM0001082;EVM0008058;EVM0016559;EVM0009694;EVM0016555;EVM0010959;EVM0016827;EVM0006276;EVM0023675;EVM0003764;EVM0000162;EVM0015497;EVM0024451;EVM0015227;EVM0006441;EVM0005216;EVM0010431;EVM0022077;EVM0008639;EVM0019764;EVM0021117;EVM0019769;EVM0011866;EVM0003283;EVM0009602;EVM0012513;EVM0017298;EVM0010590;EVM0003460;EVM0016865;EVM0021555;EVM0002649;EVM…
GO:0044444	cytoplasmic part	0.01	cellular_component	EVM0000845;EVM0001640;EVM0001084;EVM0008058;EVM0016559;EVM0016555;EVM0010959;EVM0016827;EVM0006276;EVM0003764;EVM0000162;EVM0015497;EVM0024451;EVM0015227;EVM0006441;EVM0005216;EVM0010431;EVM0008639;EVM0019764;EVM0021117;EVM0011866;EVM0003283;EVM0003168;EVM0004150;EVM0012513;EVM0003460;EVM0016865;EVM0001748;EVM0008127;EVM0018887;EVM0022547;EVM0018280;EVM0003945;EVM0016210;EVM0000022;EVM0006307;EVM…
GO:0005575	cellular_component	0.01	cellular_component	EVM0000845;EVM0013186;EVM0005267;EVM0001640;EVM0001084;EVM0001082;EVM0008058;EVM0016559;EVM0009694;EVM0016555;EVM0010959;EVM0016827;EVM0006276;EVM0023675;EVM0003764;EVM0000162;EVM0015497;EVM0000609;EVM0024451;EVM0015227;EVM0015798;EVM0006441;EVM0005216;EVM0010431;EVM0022077;EVM0008639;EVM0019764;EVM0021117;EVM0019769;EVM0022647;EVM0011866;EVM0003283;EVM0003168;EVM0009602;EVM0019059;EVM0004150;EVM…
GO:0008152	metabolic process	0.01	biological_process	EVM0001084;EVM0001082;EVM0016559;EVM0010959;EVM0016827;EVM0023675;EVM0000162;EVM0006441;EVM0010431;EVM0003283;EVM0019059;EVM0004150;EVM0010590;EVM0023073;EVM0003460;EVM0001748;EVM0021361;EVM0013984;EVM0020160;EVM0014316;EVM0013200;EVM0024555;EVM0003526;EVM0022138;EVM0007731;EVM0020541;EVM0008309;EVM0015490;EVM0011882;EVM0024420;EVM0008764;EVM0021086;EVM0006954;EVM0012067;EVM0005326;EVM0019432;EVM…
GO:0043231	intracellular membrane-bounded organelle	0.01	cellular_component	EVM0000845;EVM0013186;EVM0001640;EVM0001084;EVM0001082;EVM0008058;EVM0016559;EVM0009694;EVM0016555;EVM0010959;EVM0016827;EVM0006276;EVM0023675;EVM0003764;EVM0000162;EVM0015497;EVM0024451;EVM0015227;EVM0006441;EVM0005216;EVM0010431;EVM0022077;EVM0008639;EVM0019764;EVM0021117;EVM0019769;EVM0011866;EVM0003283;EVM0009602;EVM0012513;EVM0017298;EVM0010590;EVM0003460;EVM0016865;EVM0021555;EVM0002649;EVM…
GO:0043227	membrane-bounded organelle	0.01	cellular_component	EVM0000845;EVM0013186;EVM0001640;EVM0001084;EVM0001082;EVM0008058;EVM0016559;EVM0009694;EVM0016555;EVM0010959;EVM0016827;EVM0006276;EVM0023675;EVM0003764;EVM0000162;EVM0015497;EVM0024451;EVM0015227;EVM0006441;EVM0005216;EVM0010431;EVM0022077;EVM0008639;EVM0019764;EVM0021117;EVM0019769;EVM0011866;EVM0003283;EVM0009602;EVM0012513;EVM0017298;EVM0010590;EVM0003460;EVM0016865;EVM0021555;EVM0002649;EVM…
GO:0005623	cell	0.01	cellular_component	EVM0000845;EVM0013186;EVM0001640;EVM0001084;EVM0001082;EVM0008058;EVM0016559;EVM0009694;EVM0016555;EVM0010959;EVM0016827;EVM0006276;EVM0023675;EVM0003764;EVM0000162;EVM0015497;EVM0000609;EVM0024451;EVM0015227;EVM0015798;EVM0006441;EVM0005216;EVM0010431;EVM0022077;EVM0008639;EVM0019764;EVM0021117;EVM0019769;EVM0022647;EVM0011866;EVM0003283;EVM0003168;EVM0009602;EVM0019059;EVM0004150;EVM0012513;EVM…
GO:0044464	cell part	0.01	cellular_component	EVM0000845;EVM0013186;EVM0001640;EVM0001084;EVM0001082;EVM0008058;EVM0016559;EVM0009694;EVM0016555;EVM0010959;EVM0016827;EVM0006276;EVM0023675;EVM0003764;EVM0000162;EVM0015497;EVM0000609;EVM0024451;EVM0015227;EVM0015798;EVM0006441;EVM0005216;EVM0010431;EVM0022077;EVM0008639;EVM0019764;EVM0021117;EVM0019769;EVM0022647;EVM0011866;EVM0003283;EVM0003168;EVM0009602;EVM0019059;EVM0004150;EVM0012513;EVM…
GO:0042327	positive regulation of phosphorylation	0.01	biological_process	EVM0003283;EVM0015490;EVM0012067;EVM0019432;EVM0008669;EVM0022208;EVM0007729;EVM0015281
GO:0001934	positive regulation of protein phosphorylation	0.01	biological_process	EVM0003283;EVM0015490;EVM0012067;EVM0019432;EVM0008669;EVM0022208;EVM0007729;EVM0015281
GO:0042623	ATPase activity, coupled	0.01	molecular_function	EVM0000162;EVM0012067;EVM0008114;EVM0015439;EVM0006860;EVM0011776;EVM0023231;EVM0011390;EVM0019668;EVM0019286;EVM0014049;EVM0008185;EVM0005725;EVM0007729;EVM0013575;EVM0019863;EVM0006083
GO:0040019	positive regulation of embryonic development	0.01	biological_process	EVM0003283;EVM0019432;EVM0005752;EVM0015281
GO:0042149	cellular response to glucose starvation	0.01	biological_process	EVM0003283;EVM0019432;EVM0008669;EVM0015281
GO:0005737	cytoplasm	0.012	cellular_component	EVM0000845;EVM0013186;EVM0001640;EVM0001084;EVM0001082;EVM0008058;EVM0016559;EVM0016555;EVM0010959;EVM0016827;EVM0006276;EVM0003764;EVM0000162;EVM0015497;EVM0000609;EVM0024451;EVM0015227;EVM0015798;EVM0006441;EVM0005216;EVM0010431;EVM0008639;EVM0019764;EVM0021117;EVM0011866;EVM0003283;EVM0003168;EVM0009602;EVM0019059;EVM0004150;EVM0012513;EVM0003460;EVM0016865;EVM0001748;EVM0008127;EVM0018887;EVM…
GO:0009791	post-embryonic development	0.012	biological_process	EVM0019582;EVM0010431;EVM0003283;EVM0004150;EVM0010590;EVM0021555;EVM0003418;EVM0022138;EVM0007731;EVM0008309;EVM0011882;EVM0007887;EVM0010865;EVM0012067;EVM0020662;EVM0013685;EVM0008114;EVM0016969;EVM0015946;EVM0004184;EVM0002650;EVM0012306;EVM0023340;EVM0020116;EVM0002319;EVM0006905;EVM0011486;EVM0011078;EVM0003100;EVM0022697;EVM0018997;EVM0007691;EVM0005690;EVM0001669;EVM0023877;EVM0003666;EVM…
GO:0044248	cellular catabolic process	0.012	biological_process	EVM0001082;EVM0010959;EVM0000162;EVM0003283;EVM0019059;EVM0013200;EVM0003526;EVM0012067;EVM0019432;EVM0020662;EVM0008114;EVM0010674;EVM0015439;EVM0013638;EVM0006860;EVM0011776;EVM0023231;EVM0019142;EVM0011390;EVM0017383;EVM0019668;EVM0000966;EVM0019286;EVM0008247;EVM0001199;EVM0005879;EVM0024152;EVM0009715;EVM0014049;EVM0003939;EVM0011386;EVM0023317;EVM0008185;EVM0005725;EVM0018295;EVM0007729;EVM…
GO:0045935	positive regulation of nucleobase-containing compound metabolic process	0.012	biological_process	EVM0006441;EVM0003283;EVM0017298;EVM0023073;EVM0019432;EVM0002036;EVM0006905;EVM0022697;EVM0017877;EVM0016772;EVM0022208;EVM0012502;EVM0005725;EVM0005752;EVM0005619;EVM0001115;EVM0002705;EVM0015281;EVM0012359
GO:0000302	response to reactive oxygen species	0.014	biological_process	EVM0013186;EVM0015798;EVM0003460;EVM0006954;EVM0004853;EVM0021498;EVM0017982;EVM0021002;EVM0017383;EVM0019668;EVM0009859;EVM0019286;EVM0006094;EVM0008247;EVM0006448;EVM0015640;EVM0005619;EVM0021781
GO:0005788	endoplasmic reticulum lumen	0.014	cellular_component	EVM0003283;EVM0022547;EVM0019432;EVM0003037;EVM0016653;EVM0008567;EVM0017015;EVM0015281
GO:0005793	endoplasmic reticulum-Golgi intermediate compartment	0.014	cellular_component	EVM0006276;EVM0003283;EVM0019432;EVM0020266;EVM0015281
GO:0065009	regulation of molecular function	0.014	biological_process	EVM0000162;EVM0010431;EVM0003283;EVM0020160;EVM0015490;EVM0012067;EVM0019432;EVM0024306;EVM0017312;EVM0008669;EVM0022208;EVM0001115;EVM0002705;EVM0007729;EVM0015286;EVM0015281;EVM0013645;EVM0014713;EVM0005161
GO:0009653	anatomical structure morphogenesis	0.014	biological_process	EVM0019582;EVM0016559;EVM0006441;EVM0010431;EVM0003283;EVM0004150;EVM0010590;EVM0021555;EVM0001748;EVM0007731;EVM0008309;EVM0013142;EVM0012067;EVM0019432;EVM0020662;EVM0022341;EVM0003824;EVM0021236;EVM0008114;EVM0000733;EVM0003493;EVM0002650;EVM0021375;EVM0011486;EVM0022697;EVM0001669;EVM0016059;EVM0005879;EVM0024152;EVM0009718;EVM0002756;EVM0003939;EVM0009564;EVM0007768;EVM0015217;EVM0007729;EVM…
GO:0051172	negative regulation of nitrogen compound metabolic process	0.014	biological_process	EVM0019582;EVM0009694;EVM0010431;EVM0020160;EVM0008114;EVM0010674;EVM0017877;EVM0013488;EVM0007250;EVM0023989;EVM0010888;EVM0014427;EVM0018978;EVM0007823;EVM0003978;EVM0004207;EVM0015286;EVM0012359;EVM0022508
GO:0031401	positive regulation of protein modification process	0.014	biological_process	EVM0003283;EVM0007731;EVM0015490;EVM0012067;EVM0019432;EVM0008669;EVM0022208;EVM0007729;EVM0015281
GO:0043168	anion binding	0.014	molecular_function	EVM0015227;EVM0011369;EVM0012067;EVM0008114;EVM0010674;EVM0021498;EVM0009637;EVM0002650;EVM0014021;EVM0019668;EVM0020895;EVM0019286;EVM0010017;EVM0008366;EVM0008597;EVM0007047;EVM0011111;EVM0000299;EVM0007729;EVM0014635;EVM0013645;EVM0007064;EVM0012170;EVM0005161
GO:0031090	organelle membrane	0.014	cellular_component	EVM0016559;EVM0006276;EVM0000162;EVM0015227;EVM0008639;EVM0011866;EVM0003283;EVM0001748;EVM0022547;EVM0003945;EVM0016210;EVM0022382;EVM0023801;EVM0024650;EVM0008309;EVM0024425;EVM0008764;EVM0010865;EVM0012628;EVM0019432;EVM0013685;EVM0003852;EVM0020503;EVM0010674;EVM0021498;EVM0012449;EVM0024003;EVM0003252;EVM0020551;EVM0002319;EVM0006860;EVM0009312;EVM0023313;EVM0000862;EVM0020437;EVM0014754;EVM…
GO:0009056	catabolic process	0.014	biological_process	EVM0001082;EVM0010959;EVM0000162;EVM0003283;EVM0019059;EVM0014316;EVM0013200;EVM0003526;EVM0012067;EVM0019432;EVM0020662;EVM0008114;EVM0010674;EVM0015439;EVM0013638;EVM0006860;EVM0011776;EVM0023231;EVM0019142;EVM0011390;EVM0017383;EVM0019668;EVM0000966;EVM0019286;EVM0008247;EVM0001199;EVM0005879;EVM0024152;EVM0009715;EVM0014049;EVM0003939;EVM0006711;EVM0011386;EVM0023317;EVM0008185;EVM0005725;EVM…
GO:1901360	organic cyclic compound metabolic process	0.014	biological_process	EVM0010959;EVM0016827;EVM0023675;EVM0000162;EVM0006441;EVM0010431;EVM0003283;EVM0021361;EVM0013984;EVM0014316;EVM0013200;EVM0024555;EVM0003526;EVM0020541;EVM0011882;EVM0024420;EVM0012067;EVM0019432;EVM0020662;EVM0008114;EVM0010674;EVM0001180;EVM0008235;EVM0002650;EVM0015439;EVM0021370;EVM0016615;EVM0006860;EVM0006905;EVM0011776;EVM0014054;EVM0023231;EVM0012962;EVM0019142;EVM0011390;EVM0013354;EVM…
GO:0010562	positive regulation of phosphorus metabolic process	0.014	biological_process	EVM0003283;EVM0015490;EVM0012067;EVM0019432;EVM0008669;EVM0022208;EVM0007729;EVM0015281
GO:0034249	negative regulation of cellular amide metabolic process	0.014	biological_process	EVM0010431;EVM0020160;EVM0008114;EVM0007250;EVM0023989;EVM0010888;EVM0018978;EVM0003978
GO:0045937	positive regulation of phosphate metabolic process	0.014	biological_process	EVM0003283;EVM0015490;EVM0012067;EVM0019432;EVM0008669;EVM0022208;EVM0007729;EVM0015281
GO:0017148	negative regulation of translation	0.014	biological_process	EVM0010431;EVM0020160;EVM0008114;EVM0007250;EVM0023989;EVM0010888;EVM0018978;EVM0003978
GO:0005739	mitochondrion	0.014	cellular_component	EVM0001640;EVM0001084;EVM0003764;EVM0000162;EVM0015497;EVM0024451;EVM0015227;EVM0006441;EVM0005216;EVM0011866;EVM0003460;EVM0016865;EVM0022547;EVM0016210;EVM0008428;EVM0019937;EVM0024425;EVM0011369;EVM0012067;EVM0007673;EVM0004828;EVM0010674;EVM0021498;EVM0023340;EVM0024003;EVM0011914;EVM0013638;EVM0004769;EVM0020150;EVM0021536;EVM0007120;EVM0016332;EVM0011078;EVM0019142;EVM0007691;EVM0017312;EVM…
GO:1901135	carbohydrate derivative metabolic process	0.016	biological_process	EVM0016559;EVM0010959;EVM0000162;EVM0003283;EVM0014316;EVM0012067;EVM0019432;EVM0020662;EVM0008114;EVM0010674;EVM0015439;EVM0006860;EVM0011776;EVM0023231;EVM0019142;EVM0011390;EVM0019668;EVM0019286;EVM0011199;EVM0005239;EVM0001199;EVM0005879;EVM0014448;EVM0014049;EVM0010017;EVM0011386;EVM0008185;EVM0005725;EVM0007729;EVM0022776;EVM0015281;EVM0013575;EVM0019863;EVM0006083;EVM0022812
GO:0006397	mRNA processing	0.016	biological_process	EVM0006441;EVM0010431;EVM0020662;EVM0008114;EVM0008235;EVM0006905;EVM0013354;EVM0005479;EVM0008185;EVM0019863
GO:0051239	regulation of multicellular organismal process	0.016	biological_process	EVM0003283;EVM0023073;EVM0007731;EVM0008309;EVM0011882;EVM0012067;EVM0005326;EVM0019432;EVM0023248;EVM0002036;EVM0016969;EVM0015946;EVM0002650;EVM0014754;EVM0004372;EVM0018997;EVM0001669;EVM0021489;EVM0023101;EVM0016059;EVM0008567;EVM0010888;EVM0017015;EVM0007823;EVM0005752;EVM0007729;EVM0015281;EVM0017806;EVM0016092
GO:0031327	negative regulation of cellular biosynthetic process	0.016	biological_process	EVM0019582;EVM0009694;EVM0010431;EVM0020160;EVM0008114;EVM0010674;EVM0017877;EVM0013488;EVM0007250;EVM0023989;EVM0010888;EVM0014427;EVM0018978;EVM0007823;EVM0003978;EVM0004207;EVM0015286;EVM0012359;EVM0022508
GO:0016879	ligase activity, forming carbon-nitrogen bonds	0.016	molecular_function	EVM0001082;EVM0021086;EVM0012449;EVM0013638;EVM0014242;EVM0012902;EVM0011127;EVM0023101;EVM0024152;EVM0008662;EVM0000252;EVM0006216;EVM0006711;EVM0023317;EVM0018295;EVM0017024;EVM0017482
GO:0009306	protein secretion	0.016	biological_process	EVM0003283;EVM0004184;EVM0008567;EVM0017015;EVM0015281
GO:0002790	peptide secretion	0.016	biological_process	EVM0003283;EVM0004184;EVM0008567;EVM0017015;EVM0015281
GO:0031324	negative regulation of cellular metabolic process	0.02	biological_process	EVM0019582;EVM0009694;EVM0010431;EVM0020160;EVM0012067;EVM0008114;EVM0010674;EVM0017877;EVM0013488;EVM0007250;EVM0023989;EVM0010888;EVM0014427;EVM0018978;EVM0007823;EVM0003978;EVM0005752;EVM0004207;EVM0007729;EVM0015286;EVM0012359;EVM0022508
GO:0045036	protein targeting to chloroplast	0.02	biological_process	EVM0020503;EVM0002319;EVM0023313;EVM0024064;EVM0008366;EVM0015217;EVM0012170
GO:0072598	protein localization to chloroplast	0.02	biological_process	EVM0020503;EVM0002319;EVM0023313;EVM0024064;EVM0008366;EVM0015217;EVM0012170
GO:0072596	establishment of protein localization to chloroplast	0.02	biological_process	EVM0020503;EVM0002319;EVM0023313;EVM0024064;EVM0008366;EVM0015217;EVM0012170
GO:0031328	positive regulation of cellular biosynthetic process	0.022	biological_process	EVM0006441;EVM0017298;EVM0023073;EVM0012067;EVM0008114;EVM0002036;EVM0006905;EVM0022697;EVM0017877;EVM0016772;EVM0022208;EVM0012502;EVM0005725;EVM0005752;EVM0005619;EVM0001115;EVM0002705;EVM0007729;EVM0012359
GO:0071944	cell periphery	0.022	cellular_component	EVM0016559;EVM0016555;EVM0016827;EVM0022647;EVM0004150;EVM0012513;EVM0016865;EVM0016210;EVM0016359;EVM0022382;EVM0007518;EVM0023801;EVM0009831;EVM0003526;EVM0008309;EVM0024425;EVM0011369;EVM0003224;EVM0007887;EVM0011962;EVM0008764;EVM0012628;EVM0002453;EVM0012067;EVM0019536;EVM0013685;EVM0021565;EVM0011136;EVM0019871;EVM0016732;EVM0022534;EVM0013824;EVM0008296;EVM0010674;EVM0006166;EVM0021498;EVM…
GO:0043228	non-membrane-bounded organelle	0.022	cellular_component	EVM0016559;EVM0015227;EVM0006441;EVM0019769;EVM0003283;EVM0003460;EVM0021361;EVM0013200;EVM0023801;EVM0003526;EVM0011313;EVM0007731;EVM0011366;EVM0007887;EVM0012067;EVM0022341;EVM0010674;EVM0020683;EVM0001180;EVM0019267;EVM0012306;EVM0024003;EVM0003252;EVM0020551;EVM0023287;EVM0011776;EVM0021717;EVM0017130;EVM0014754;EVM0018033;EVM0008247;EVM0022708;EVM0022952;EVM0011797;EVM0005309;EVM0012360;EVM…
GO:0043232	intracellular non-membrane-bounded organelle	0.022	cellular_component	EVM0016559;EVM0015227;EVM0006441;EVM0019769;EVM0003283;EVM0003460;EVM0021361;EVM0013200;EVM0023801;EVM0003526;EVM0011313;EVM0007731;EVM0011366;EVM0007887;EVM0012067;EVM0022341;EVM0010674;EVM0020683;EVM0001180;EVM0019267;EVM0012306;EVM0024003;EVM0003252;EVM0020551;EVM0023287;EVM0011776;EVM0021717;EVM0017130;EVM0014754;EVM0018033;EVM0008247;EVM0022708;EVM0022952;EVM0011797;EVM0005309;EVM0012360;EVM…
GO:0032269	negative regulation of cellular protein metabolic process	0.022	biological_process	EVM0010431;EVM0020160;EVM0012067;EVM0008114;EVM0007250;EVM0023989;EVM0010888;EVM0018978;EVM0003978;EVM0007729;EVM0015286
GO:0036094	small molecule binding	0.022	molecular_function	EVM0015227;EVM0010590;EVM0011369;EVM0012067;EVM0008114;EVM0010674;EVM0021498;EVM0009637;EVM0002650;EVM0019668;EVM0020895;EVM0019286;EVM0010017;EVM0008366;EVM0008597;EVM0007047;EVM0011111;EVM0000299;EVM0007729;EVM0014635;EVM0013645;EVM0012170;EVM0005161
GO:0009117	nucleotide metabolic process	0.022	biological_process	EVM0010959;EVM0000162;EVM0003283;EVM0014316;EVM0012067;EVM0019432;EVM0020662;EVM0008114;EVM0010674;EVM0015439;EVM0006860;EVM0011776;EVM0023231;EVM0011390;EVM0019668;EVM0019286;EVM0005239;EVM0005879;EVM0014049;EVM0010017;EVM0011386;EVM0008185;EVM0005725;EVM0007729;EVM0015281;EVM0013575;EVM0019863;EVM0006083
GO:0009880	embryonic pattern specification	0.022	biological_process	EVM0010865;EVM0012067;EVM0008114;EVM0012306;EVM0001669;EVM0001830;EVM0007729
GO:0009890	negative regulation of biosynthetic process	0.022	biological_process	EVM0019582;EVM0009694;EVM0010431;EVM0020160;EVM0008114;EVM0010674;EVM0017877;EVM0013488;EVM0007250;EVM0023989;EVM0010888;EVM0014427;EVM0018978;EVM0007823;EVM0003978;EVM0004207;EVM0015286;EVM0012359;EVM0022508
GO:0006753	nucleoside phosphate metabolic process	0.022	biological_process	EVM0010959;EVM0000162;EVM0003283;EVM0014316;EVM0012067;EVM0019432;EVM0020662;EVM0008114;EVM0010674;EVM0015439;EVM0006860;EVM0011776;EVM0023231;EVM0011390;EVM0019668;EVM0019286;EVM0005239;EVM0005879;EVM0014049;EVM0010017;EVM0011386;EVM0008185;EVM0005725;EVM0007729;EVM0015281;EVM0013575;EVM0019863;EVM0006083
GO:0051347	positive regulation of transferase activity	0.022	biological_process	EVM0003283;EVM0015490;EVM0012067;EVM0019432;EVM0008669;EVM0022208;EVM0007729;EVM0015281
GO:0009891	positive regulation of biosynthetic process	0.022	biological_process	EVM0006441;EVM0017298;EVM0023073;EVM0012067;EVM0008114;EVM0002036;EVM0006905;EVM0022697;EVM0017877;EVM0016772;EVM0022208;EVM0012502;EVM0005725;EVM0005752;EVM0005619;EVM0001115;EVM0002705;EVM0007729;EVM0012359
GO:0000003	reproduction	0.022	biological_process	EVM0019582;EVM0006441;EVM0010431;EVM0003283;EVM0004150;EVM0010590;EVM0001748;EVM0003418;EVM0008428;EVM0022138;EVM0007731;EVM0008309;EVM0013142;EVM0011882;EVM0010865;EVM0012067;EVM0020662;EVM0008114;EVM0014780;EVM0016969;EVM0015946;EVM0003493;EVM0002650;EVM0012306;EVM0020116;EVM0002319;EVM0006905;EVM0007844;EVM0023231;EVM0011486;EVM0011078;EVM0022697;EVM0018997;EVM0007691;EVM0001669;EVM0023877;EVM…
GO:0035967	cellular response to topologically incorrect protein	0.022	biological_process	EVM0003283;EVM0003460;EVM0019432;EVM0007950;EVM0005619;EVM0015281
GO:0034620	cellular response to unfolded protein	0.022	biological_process	EVM0003283;EVM0003460;EVM0019432;EVM0007950;EVM0005619;EVM0015281
GO:0030176	integral component of endoplasmic reticulum membrane	0.022	cellular_component	EVM0003283;EVM0019432;EVM0006860;EVM0007950;EVM0015281
GO:0031227	intrinsic component of endoplasmic reticulum membrane	0.022	cellular_component	EVM0003283;EVM0019432;EVM0006860;EVM0007950;EVM0015281
GO:0032270	positive regulation of cellular protein metabolic process	0.024	biological_process	EVM0003283;EVM0007731;EVM0015490;EVM0012067;EVM0019432;EVM0008114;EVM0008669;EVM0022208;EVM0007729;EVM0015281
GO:0016071	mRNA metabolic process	0.024	biological_process	EVM0006441;EVM0010431;EVM0013200;EVM0003526;EVM0020662;EVM0008114;EVM0008235;EVM0006905;EVM0013354;EVM0003939;EVM0005479;EVM0008185;EVM0019863
GO:0065007	biological regulation	0.026	biological_process	EVM0019582;EVM0009694;EVM0023675;EVM0000162;EVM0006441;EVM0010431;EVM0003283;EVM0017298;EVM0010590;EVM0023073;EVM0021555;EVM0002649;EVM0021361;EVM0004109;EVM0022547;EVM0020160;EVM0000338;EVM0013200;EVM0003526;EVM0007731;EVM0008309;EVM0015490;EVM0011882;EVM0024420;EVM0007887;EVM0008764;EVM0012067;EVM0005326;EVM0019432;EVM0013685;EVM0021236;EVM0008114;EVM0023248;EVM0022534;EVM0002036;EVM0016969;EVM…
GO:0051247	positive regulation of protein metabolic process	0.026	biological_process	EVM0003283;EVM0007731;EVM0015490;EVM0012067;EVM0019432;EVM0008114;EVM0008669;EVM0022208;EVM0007729;EVM0015281
GO:0050789	regulation of biological process	0.028	biological_process	EVM0019582;EVM0009694;EVM0023675;EVM0000162;EVM0006441;EVM0010431;EVM0003283;EVM0017298;EVM0010590;EVM0023073;EVM0021555;EVM0002649;EVM0021361;EVM0004109;EVM0020160;EVM0000338;EVM0013200;EVM0003526;EVM0007731;EVM0008309;EVM0015490;EVM0011882;EVM0024420;EVM0007887;EVM0008764;EVM0012067;EVM0005326;EVM0019432;EVM0013685;EVM0021236;EVM0008114;EVM0023248;EVM0002036;EVM0016969;EVM0000733;EVM0020503;EVM…
GO:0000578	embryonic axis specification	0.028	biological_process	EVM0010865;EVM0012067;EVM0008114;EVM0001669;EVM0001830;EVM0007729
GO:0060904	regulation of protein folding in endoplasmic reticulum	0.034	biological_process	EVM0003283;EVM0019432;EVM0015281
GO:0021680	cerebellar Purkinje cell layer development	0.034	biological_process	EVM0003283;EVM0019432;EVM0015281
GO:0030902	hindbrain development	0.034	biological_process	EVM0003283;EVM0019432;EVM0015281
GO:0021577	hindbrain structural organization	0.034	biological_process	EVM0003283;EVM0019432;EVM0015281
GO:0021575	hindbrain morphogenesis	0.034	biological_process	EVM0003283;EVM0019432;EVM0015281
GO:0034663	endoplasmic reticulum chaperone complex	0.034	cellular_component	EVM0003283;EVM0019432;EVM0015281
GO:0021695	cerebellar cortex development	0.034	biological_process	EVM0003283;EVM0019432;EVM0015281
GO:0021587	cerebellum morphogenesis	0.034	biological_process	EVM0003283;EVM0019432;EVM0015281
GO:0021589	cerebellum structural organization	0.034	biological_process	EVM0003283;EVM0019432;EVM0015281
GO:2000379	positive regulation of reactive oxygen species metabolic process	0.034	biological_process	EVM0012067;EVM0017312;EVM0007729
GO:0021549	cerebellum development	0.034	biological_process	EVM0003283;EVM0019432;EVM0015281
GO:0022037	metencephalon development	0.034	biological_process	EVM0003283;EVM0019432;EVM0015281
GO:0051087	chaperone binding	0.052	molecular_function	EVM0003283;EVM0019432;EVM0019668;EVM0019286;EVM0015281
GO:0006913	nucleocytoplasmic transport	0.054	biological_process	EVM0010431;EVM0021117;EVM0003460;EVM0013142;EVM0010674;EVM0002650;EVM0000741;EVM0023989;EVM0008896
GO:0051169	nuclear transport	0.054	biological_process	EVM0010431;EVM0021117;EVM0003460;EVM0013142;EVM0010674;EVM0002650;EVM0000741;EVM0023989;EVM0008896
GO:0016874	ligase activity	0.054	molecular_function	EVM0001082;EVM0021086;EVM0012449;EVM0002650;EVM0013638;EVM0014242;EVM0012902;EVM0011127;EVM0006094;EVM0023101;EVM0024152;EVM0008662;EVM0009715;EVM0000252;EVM0006216;EVM0006711;EVM0023317;EVM0018295;EVM0017024;EVM0017482
GO:0009792	embryo development ending in birth or egg hatching	0.054	biological_process	EVM0006441;EVM0010431;EVM0021182;EVM0003283;EVM0012067;EVM0020662;EVM0008114;EVM0002650;EVM0006905;EVM0008185;EVM0007729;EVM0015281
GO:0040007	growth	0.054	biological_process	EVM0016559;EVM0010431;EVM0003283;EVM0004150;EVM0021555;EVM0001748;EVM0003418;EVM0013142;EVM0020662;EVM0003824;EVM0021236;EVM0008114;EVM0003493;EVM0002650;EVM0011486;EVM0001669;EVM0023101;EVM0006216;EVM0007346;EVM0008185;EVM0007768;EVM0015281;EVM0000754;EVM0022508
GO:0051248	negative regulation of protein metabolic process	0.054	biological_process	EVM0010431;EVM0020160;EVM0012067;EVM0008114;EVM0007250;EVM0023989;EVM0010888;EVM0018978;EVM0003978;EVM0007729;EVM0015286
GO:0044764	multi-organism cellular process	0.054	biological_process	EVM0016555;EVM0006441;EVM0021498;EVM0006905;EVM0021717;EVM0014754;EVM0013822;EVM0009131;EVM0006711;EVM0008597;EVM0000299;EVM0020636;EVM0004060;EVM0016092
GO:0032940	secretion by cell	0.054	biological_process	EVM0003283;EVM0019432;EVM0004184;EVM0008567;EVM0017015;EVM0015281
GO:0048513	animal organ development	0.056	biological_process	EVM0019582;EVM0000162;EVM0003283;EVM0021555;EVM0001748;EVM0004109;EVM0022138;EVM0007731;EVM0008309;EVM0007887;EVM0012067;EVM0019432;EVM0022341;EVM0021236;EVM0008114;EVM0000733;EVM0021375;EVM0006905;EVM0023231;EVM0011486;EVM0011078;EVM0003100;EVM0022697;EVM0011390;EVM0001669;EVM0023877;EVM0016059;EVM0005879;EVM0024152;EVM0002756;EVM0008567;EVM0003939;EVM0017015;EVM0008185;EVM0007768;EVM0007823;EVM…
GO:0055086	nucleobase-containing small molecule metabolic process	0.056	biological_process	EVM0010959;EVM0000162;EVM0003283;EVM0014316;EVM0012067;EVM0019432;EVM0020662;EVM0008114;EVM0010674;EVM0015439;EVM0006860;EVM0011776;EVM0023231;EVM0011390;EVM0019668;EVM0019286;EVM0005239;EVM0005879;EVM0014049;EVM0010017;EVM0011386;EVM0008185;EVM0005725;EVM0007729;EVM0015281;EVM0013575;EVM0019863;EVM0006083
GO:0019222	regulation of metabolic process	0.058	biological_process	EVM0019582;EVM0009694;EVM0023675;EVM0000162;EVM0006441;EVM0010431;EVM0003283;EVM0017298;EVM0010590;EVM0023073;EVM0021361;EVM0020160;EVM0000338;EVM0013200;EVM0003526;EVM0007731;EVM0015490;EVM0024420;EVM0007887;EVM0012067;EVM0005326;EVM0019432;EVM0013685;EVM0021236;EVM0008114;EVM0023248;EVM0002036;EVM0000733;EVM0010674;EVM0015946;EVM0001180;EVM0006905;EVM0019929;EVM0022697;EVM0019142;EVM0023304;EVM…
GO:0061458	reproductive system development	0.06	biological_process	EVM0019582;EVM0004150;EVM0010590;EVM0003418;EVM0022138;EVM0007731;EVM0008309;EVM0011882;EVM0010865;EVM0012067;EVM0008114;EVM0016969;EVM0015946;EVM0012306;EVM0020116;EVM0002319;EVM0006905;EVM0011486;EVM0011078;EVM0022697;EVM0018997;EVM0007691;EVM0001669;EVM0023877;EVM0003666;EVM0016059;EVM0005879;EVM0011797;EVM0003939;EVM0023903;EVM0008185;EVM0019124;EVM0014766;EVM0005686;EVM0005752;EVM0001830;EVM…
GO:0048608	reproductive structure development	0.06	biological_process	EVM0019582;EVM0004150;EVM0010590;EVM0003418;EVM0022138;EVM0007731;EVM0008309;EVM0011882;EVM0010865;EVM0012067;EVM0008114;EVM0016969;EVM0015946;EVM0012306;EVM0020116;EVM0002319;EVM0006905;EVM0011486;EVM0011078;EVM0022697;EVM0018997;EVM0007691;EVM0001669;EVM0023877;EVM0003666;EVM0016059;EVM0005879;EVM0011797;EVM0003939;EVM0023903;EVM0008185;EVM0019124;EVM0014766;EVM0005686;EVM0005752;EVM0001830;EVM…
GO:0071407	cellular response to organic cyclic compound	0.06	biological_process	EVM0010431;EVM0021361;EVM0009831;EVM0003526;EVM0008309;EVM0012067;EVM0023248;EVM0001180;EVM0019142;EVM0022208;EVM0007250;EVM0010888;EVM0007729
GO:0071826	ribonucleoprotein complex subunit organization	0.06	biological_process	EVM0013354;EVM0023989;EVM0008185;EVM0005725;EVM0019863
GO:0000932	P-body	0.06	cellular_component	EVM0013200;EVM0003526;EVM0003939;EVM0018978;EVM0003978
GO:0042787	protein ubiquitination involved in ubiquitin-dependent protein catabolic process	0.06	biological_process	EVM0001082;EVM0013638;EVM0024152;EVM0023317;EVM0018295
GO:0022618	ribonucleoprotein complex assembly	0.06	biological_process	EVM0013354;EVM0023989;EVM0008185;EVM0005725;EVM0019863
GO:0080134	regulation of response to stress	0.068	biological_process	EVM0007731;EVM0015490;EVM0012067;EVM0021375;EVM0019142;EVM0018997;EVM0012902;EVM0017312;EVM0023101;EVM0009144;EVM0003115;EVM0001115;EVM0002705;EVM0007729;EVM0017806
GO:0002119	nematode larval development	0.068	biological_process	EVM0010431;EVM0003283;EVM0012067;EVM0020662;EVM0008114;EVM0002650;EVM0006905;EVM0008185;EVM0007729;EVM0015281
GO:0045995	regulation of embryonic development	0.07	biological_process	EVM0003283;EVM0019432;EVM0005752;EVM0015281
GO:0002164	larval development	0.082	biological_process	EVM0010431;EVM0003283;EVM0012067;EVM0020662;EVM0008114;EVM0002650;EVM0006905;EVM0008185;EVM0007729;EVM0015281
GO:0009416	response to light stimulus	0.082	biological_process	EVM0015798;EVM0010590;EVM0003460;EVM0013984;EVM0003526;EVM0008309;EVM0011882;EVM0010865;EVM0006954;EVM0023248;EVM0004853;EVM0021498;EVM0011486;EVM0014021;EVM0021002;EVM0022697;EVM0009859;EVM0001669;EVM0013488;EVM0008247;EVM0006448;EVM0014049;EVM0024441;EVM0015640;EVM0019124;EVM0005619;EVM0015286;EVM0021781;EVM0013645;EVM0005161;EVM0000301;EVM0022508
GO:0046903	secretion	0.082	biological_process	EVM0003283;EVM0019432;EVM0004184;EVM0008567;EVM0017015;EVM0015281
GO:0043066	negative regulation of apoptotic process	0.082	biological_process	EVM0003283;EVM0012067;EVM0019432;EVM0007729;EVM0015286;EVM0015281
GO:0045927	positive regulation of growth	0.092	biological_process	EVM0006441;EVM0010431;EVM0003283;EVM0008114;EVM0002650;EVM0012288;EVM0005752;EVM0015286;EVM0015281
GO:0009615	response to virus	0.092	biological_process	EVM0016555;EVM0021498;EVM0021717;EVM0014754;EVM0006711;EVM0008597;EVM0000299;EVM0004060;EVM0016092
GO:0051716	cellular response to stimulus	0.092	biological_process	EVM0006441;EVM0010431;EVM0003283;EVM0003460;EVM0021361;EVM0013984;EVM0009831;EVM0003526;EVM0008309;EVM0015490;EVM0011882;EVM0007887;EVM0012067;EVM0019432;EVM0013685;EVM0008114;EVM0023248;EVM0020503;EVM0010674;EVM0001180;EVM0021375;EVM0006905;EVM0019929;EVM0023231;EVM0019142;EVM0024306;EVM0017383;EVM0023304;EVM0019668;EVM0000966;EVM0017877;EVM0019286;EVM0001669;EVM0021489;EVM0013488;EVM0008247;EVM…
GO:0043581	obsolete mycelium development	0.092	biological_process	EVM0006441;EVM0010674;EVM0019668;EVM0019286;EVM0005725
GO:0005681	spliceosomal complex	0.092	cellular_component	EVM0020662;EVM0008114;EVM0005479;EVM0008185;EVM0019863
GO:0003674	molecular_function	0.098	molecular_function	EVM0001084;EVM0001082;EVM0009694;EVM0010959;EVM0016827;EVM0000162;EVM0015227;EVM0006441;EVM0010431;EVM0003283;EVM0017298;EVM0010590;EVM0003460;EVM0001748;EVM0021361;EVM0022547;EVM0020165;EVM0020160;EVM0014316;EVM0000338;EVM0023801;EVM0011317;EVM0022138;EVM0007731;EVM0020541;EVM0005554;EVM0008309;EVM0013142;EVM0011369;EVM0015490;EVM0008764;EVM0021086;EVM0002453;EVM0012067;EVM0005326;EVM0019432;EVM…
GO:0010557	positive regulation of macromolecule biosynthetic process	0.098	biological_process	EVM0006441;EVM0017298;EVM0023073;EVM0008114;EVM0002036;EVM0006905;EVM0022697;EVM0017877;EVM0016772;EVM0022208;EVM0012502;EVM0005725;EVM0005752;EVM0005619;EVM0001115;EVM0002705;EVM0012359
GO:0071345	cellular response to cytokine stimulus	0.102	biological_process	EVM0003283;EVM0012067;EVM0019432;EVM0008114;EVM0007729;EVM0015281
GO:0009409	response to cold	0.104	biological_process	EVM0008058;EVM0016210;EVM0023801;EVM0015490;EVM0012067;EVM0008235;EVM0014054;EVM0014754;EVM0023304;EVM0017312;EVM0008247;EVM0023101;EVM0008567;EVM0014427;EVM0017015;EVM0008366;EVM0007768;EVM0001830;EVM0007729;EVM0012170;EVM0004060;EVM0005161;EVM0016092;EVM0022508
GO:0005773	vacuole	0.104	cellular_component	EVM0000845;EVM0016559;EVM0015227;EVM0022547;EVM0016210;EVM0006307;EVM0022382;EVM0023801;EVM0024650;EVM0024425;EVM0008764;EVM0010865;EVM0012628;EVM0013685;EVM0010674;EVM0021498;EVM0024003;EVM0015439;EVM0003252;EVM0020551;EVM0006860;EVM0020437;EVM0014754;EVM0019142;EVM0003037;EVM0024306;EVM0015677;EVM0004839;EVM0008247;EVM0022549;EVM0008567;EVM0011337;EVM0017015;EVM0008597;EVM0007045;EVM0007047;EVM…
GO:0040008	regulation of growth	0.108	biological_process	EVM0006441;EVM0010431;EVM0003283;EVM0008114;EVM0002650;EVM0012288;EVM0001669;EVM0000741;EVM0023101;EVM0008567;EVM0017015;EVM0005752;EVM0015286;EVM0015281
GO:0009314	response to radiation	0.108	biological_process	EVM0015798;EVM0010590;EVM0003460;EVM0013984;EVM0003526;EVM0008309;EVM0011882;EVM0010865;EVM0006954;EVM0023248;EVM0004853;EVM0021498;EVM0011486;EVM0014021;EVM0021002;EVM0022697;EVM0009859;EVM0001669;EVM0013488;EVM0008247;EVM0006448;EVM0014049;EVM0024441;EVM0015640;EVM0019124;EVM0005619;EVM0015286;EVM0021781;EVM0013645;EVM0005161;EVM0000301;EVM0022508
GO:0097708	intracellular vesicle	0.114	cellular_component	EVM0008639;EVM0003283;EVM0001748;EVM0008309;EVM0010865;EVM0012628;EVM0012067;EVM0019432;EVM0003852;EVM0010674;EVM0015536;EVM0009312;EVM0000862;EVM0020437;EVM0011390;EVM0021578;EVM0011199;EVM0006216;EVM0018091;EVM0007768;EVM0015972;EVM0024534;EVM0007729;EVM0015281;EVM0018065;EVM0002293;EVM0002060;EVM0022812
GO:0061077	chaperone-mediated protein folding	0.114	biological_process	EVM0003460;EVM0010674;EVM0019668;EVM0019286;EVM0005725
GO:0031347	regulation of defense response	0.124	biological_process	EVM0007731;EVM0015490;EVM0012067;EVM0021375;EVM0019142;EVM0018997;EVM0012902;EVM0023101;EVM0003115;EVM0001115;EVM0002705;EVM0007729;EVM0017806
GO:0034097	response to cytokine	0.13	biological_process	EVM0003283;EVM0012067;EVM0019432;EVM0008114;EVM0007729;EVM0015281
GO:0002576	platelet degranulation	0.134	biological_process	EVM0003283;EVM0019432;EVM0015281
GO:0030168	platelet activation	0.134	biological_process	EVM0003283;EVM0019432;EVM0015281
GO:0003994	aconitate hydratase activity	0.134	molecular_function	EVM0007045;EVM0007047;EVM0011111
GO:0006983	ER overload response	0.134	biological_process	EVM0003283;EVM0019432;EVM0015281
GO:1903332	regulation of protein folding	0.134	biological_process	EVM0003283;EVM0019432;EVM0015281
GO:0051341	regulation of oxidoreductase activity	0.134	biological_process	EVM0012067;EVM0017312;EVM0007729
GO:0051128	regulation of cellular component organization	0.16	biological_process	EVM0007731;EVM0012067;EVM0008114;EVM0012288;EVM0017877;EVM0000741;EVM0008185;EVM0008184;EVM0005725;EVM0005752;EVM0020274;EVM0007729;EVM0015286;EVM0012359
GO:0070887	cellular response to chemical stimulus	0.16	biological_process	EVM0010431;EVM0003283;EVM0003460;EVM0021361;EVM0009831;EVM0003526;EVM0008309;EVM0011882;EVM0007887;EVM0012067;EVM0019432;EVM0008114;EVM0023248;EVM0001180;EVM0021375;EVM0019929;EVM0019142;EVM0024306;EVM0017383;EVM0023304;EVM0019668;EVM0019286;EVM0001669;EVM0008247;EVM0022208;EVM0007250;EVM0003939;EVM0006216;EVM0010888;EVM0007950;EVM0012502;EVM0019124;EVM0005725;EVM0007823;EVM0005619;EVM0001115;EVM…
GO:1990234	transferase complex	0.16	cellular_component	EVM0016559;EVM0006441;EVM0021361;EVM0003418;EVM0011882;EVM0014780;EVM0006905;EVM0022697;EVM0008858;EVM0022952;EVM0015062;EVM0015286;EVM0002803;EVM0000540;EVM0017154;EVM0006722;EVM0002069
GO:0009966	regulation of signal transduction	0.186	biological_process	EVM0003283;EVM0015490;EVM0008764;EVM0012067;EVM0019432;EVM0023248;EVM0021375;EVM0019929;EVM0001669;EVM0023101;EVM0022208;EVM0006216;EVM0007823;EVM0007729;EVM0015281;EVM0017806
GO:0019637	organophosphate metabolic process	0.186	biological_process	EVM0010959;EVM0000162;EVM0003283;EVM0001748;EVM0014316;EVM0012067;EVM0019432;EVM0020662;EVM0008114;EVM0010674;EVM0015439;EVM0006860;EVM0011776;EVM0023231;EVM0011390;EVM0019668;EVM0019286;EVM0005239;EVM0005879;EVM0014049;EVM0010017;EVM0011386;EVM0008185;EVM0005725;EVM0005752;EVM0007729;EVM0015281;EVM0013575;EVM0019863;EVM0006083
GO:0006508	proteolysis	0.192	biological_process	EVM0001082;EVM0003283;EVM0019432;EVM0013638;EVM0007120;EVM0019450;EVM0001199;EVM0024152;EVM0020030;EVM0023317;EVM0018295;EVM0015286;EVM0015281;EVM0023601
GO:0048469	cell maturation	0.194	biological_process	EVM0001748;EVM0012067;EVM0021236;EVM0008114;EVM0021375;EVM0001669;EVM0007768;EVM0007729;EVM0022812
GO:0006417	regulation of translation	0.194	biological_process	EVM0010431;EVM0020160;EVM0007887;EVM0008114;EVM0007250;EVM0023989;EVM0010888;EVM0018978;EVM0003978
GO:0023051	regulation of signaling	0.196	biological_process	EVM0003283;EVM0015490;EVM0008764;EVM0012067;EVM0019432;EVM0023248;EVM0021375;EVM0019929;EVM0001669;EVM0023101;EVM0022208;EVM0006216;EVM0007823;EVM0007729;EVM0015281;EVM0017806
GO:0050790	regulation of catalytic activity	0.204	biological_process	EVM0000162;EVM0010431;EVM0003283;EVM0020160;EVM0015490;EVM0012067;EVM0019432;EVM0017312;EVM0008669;EVM0022208;EVM0007729;EVM0015286;EVM0015281;EVM0014713;EVM0005161
GO:0071013	catalytic step 2 spliceosome	0.204	cellular_component	EVM0020662;EVM0008114;EVM0008185;EVM0019863
GO:0048583	regulation of response to stimulus	0.226	biological_process	EVM0003283;EVM0007731;EVM0015490;EVM0011882;EVM0008764;EVM0012067;EVM0019432;EVM0023248;EVM0021375;EVM0019929;EVM0019142;EVM0018997;EVM0012902;EVM0017312;EVM0001669;EVM0023101;EVM0009144;EVM0022208;EVM0006216;EVM0003115;EVM0007823;EVM0001115;EVM0002705;EVM0007729;EVM0015281;EVM0017806
GO:0016020	membrane	0.228	cellular_component	EVM0016559;EVM0016555;EVM0010959;EVM0016827;EVM0006276;EVM0000162;EVM0015227;EVM0005216;EVM0008639;EVM0022647;EVM0011866;EVM0003283;EVM0004150;EVM0012513;EVM0023073;EVM0016865;EVM0001748;EVM0022547;EVM0003945;EVM0016210;EVM0016359;EVM0022382;EVM0007518;EVM0023801;EVM0009426;EVM0009831;EVM0003526;EVM0024650;EVM0005554;EVM0008309;EVM0012808;EVM0024425;EVM0003224;EVM0024420;EVM0007887;EVM0011962;EVM…
GO:0045859	regulation of protein kinase activity	0.23	biological_process	EVM0003283;EVM0015490;EVM0012067;EVM0019432;EVM0008669;EVM0022208;EVM0007729;EVM0015281
GO:0043549	regulation of kinase activity	0.23	biological_process	EVM0003283;EVM0015490;EVM0012067;EVM0019432;EVM0008669;EVM0022208;EVM0007729;EVM0015281
GO:0034248	regulation of cellular amide metabolic process	0.23	biological_process	EVM0010431;EVM0020160;EVM0007887;EVM0008114;EVM0007250;EVM0023989;EVM0010888;EVM0018978;EVM0003978
GO:0044093	positive regulation of molecular function	0.23	biological_process	EVM0003283;EVM0015490;EVM0012067;EVM0019432;EVM0017312;EVM0008669;EVM0022208;EVM0007729;EVM0015281;EVM0005161
GO:0044712	single-organism catabolic process	0.232	biological_process	EVM0010959;EVM0000162;EVM0003283;EVM0019059;EVM0014316;EVM0012067;EVM0019432;EVM0020662;EVM0008114;EVM0010674;EVM0015439;EVM0006860;EVM0011776;EVM0023231;EVM0019142;EVM0011390;EVM0019668;EVM0019286;EVM0001199;EVM0005879;EVM0009715;EVM0014049;EVM0011386;EVM0008185;EVM0005725;EVM0007729;EVM0005980;EVM0006139;EVM0015281;EVM0013575;EVM0019863;EVM0006083
GO:0022613	ribonucleoprotein complex biogenesis	0.236	biological_process	EVM0007887;EVM0021370;EVM0011776;EVM0013354;EVM0005309;EVM0015062;EVM0023989;EVM0008185;EVM0005725;EVM0002803;EVM0019863
GO:0071310	cellular response to organic substance	0.236	biological_process	EVM0010431;EVM0003283;EVM0003460;EVM0021361;EVM0009831;EVM0003526;EVM0008309;EVM0011882;EVM0007887;EVM0012067;EVM0019432;EVM0008114;EVM0023248;EVM0001180;EVM0021375;EVM0019929;EVM0019142;EVM0024306;EVM0023304;EVM0001669;EVM0022208;EVM0007250;EVM0003939;EVM0006216;EVM0010888;EVM0007950;EVM0012502;EVM0019124;EVM0007823;EVM0005619;EVM0007729;EVM0015281
GO:0010628	positive regulation of gene expression	0.246	biological_process	EVM0006441;EVM0017298;EVM0023073;EVM0008114;EVM0002036;EVM0006905;EVM0022697;EVM0017877;EVM0016772;EVM0022208;EVM0012502;EVM0005752;EVM0005619;EVM0001115;EVM0002705;EVM0012359
GO:1901700	response to oxygen-containing compound	0.25	biological_process	EVM0013186;EVM0001903;EVM0009694;EVM0015798;EVM0003460;EVM0022313;EVM0009831;EVM0003526;EVM0008309;EVM0011882;EVM0007887;EVM0006954;EVM0023248;EVM0004853;EVM0021498;EVM0015439;EVM0021375;EVM0017982;EVM0014054;EVM0019929;EVM0021717;EVM0014021;EVM0021002;EVM0019142;EVM0024306;EVM0017383;EVM0023304;EVM0003626;EVM0018997;EVM0019668;EVM0007884;EVM0011127;EVM0009859;EVM0022240;EVM0019286;EVM0006094;EVM…
GO:0060255	regulation of macromolecule metabolic process	0.25	biological_process	EVM0019582;EVM0009694;EVM0023675;EVM0006441;EVM0010431;EVM0003283;EVM0017298;EVM0010590;EVM0023073;EVM0021361;EVM0020160;EVM0000338;EVM0013200;EVM0003526;EVM0007731;EVM0015490;EVM0007887;EVM0012067;EVM0005326;EVM0019432;EVM0021236;EVM0008114;EVM0023248;EVM0002036;EVM0000733;EVM0010674;EVM0015946;EVM0001180;EVM0006905;EVM0022697;EVM0023304;EVM0013354;EVM0010051;EVM0002943;EVM0018997;EVM0020807;EVM…
GO:0065003	macromolecular complex assembly	0.252	biological_process	EVM0006954;EVM0012067;EVM0020662;EVM0020116;EVM0021002;EVM0013354;EVM0009859;EVM0006448;EVM0023989;EVM0015640;EVM0008185;EVM0005725;EVM0007729;EVM0019863
GO:1902680	positive regulation of RNA biosynthetic process	0.254	biological_process	EVM0006441;EVM0017298;EVM0023073;EVM0002036;EVM0006905;EVM0022697;EVM0017877;EVM0016772;EVM0022208;EVM0012502;EVM0005752;EVM0005619;EVM0001115;EVM0002705;EVM0012359
GO:0051254	positive regulation of RNA metabolic process	0.254	biological_process	EVM0006441;EVM0017298;EVM0023073;EVM0002036;EVM0006905;EVM0022697;EVM0017877;EVM0016772;EVM0022208;EVM0012502;EVM0005752;EVM0005619;EVM0001115;EVM0002705;EVM0012359
GO:0008135	translation factor activity, RNA binding	0.254	molecular_function	EVM0020160;EVM0020662;EVM0008114;EVM0020895;EVM0001879;EVM0003583
GO:0006403	RNA localization	0.254	biological_process	EVM0010431;EVM0003460;EVM0012067;EVM0008114;EVM0002650;EVM0007729
GO:0022607	cellular component assembly	0.26	biological_process	EVM0008309;EVM0006954;EVM0012067;EVM0020662;EVM0008114;EVM0020116;EVM0017130;EVM0021002;EVM0013354;EVM0009859;EVM0006448;EVM0009564;EVM0023989;EVM0005715;EVM0015640;EVM0008185;EVM0005725;EVM0007729;EVM0013010;EVM0019863
GO:0010468	regulation of gene expression	0.26	biological_process	EVM0009694;EVM0023675;EVM0006441;EVM0010431;EVM0003283;EVM0017298;EVM0010590;EVM0023073;EVM0021361;EVM0020160;EVM0000338;EVM0013200;EVM0003526;EVM0007731;EVM0007887;EVM0012067;EVM0005326;EVM0021236;EVM0008114;EVM0023248;EVM0002036;EVM0000733;EVM0010674;EVM0015946;EVM0001180;EVM0006905;EVM0022697;EVM0023304;EVM0013354;EVM0010051;EVM0002943;EVM0018997;EVM0020807;EVM0017877;EVM0016772;EVM0013488;EVM…
GO:0003006	developmental process involved in reproduction	0.26	biological_process	EVM0019582;EVM0004150;EVM0010590;EVM0001748;EVM0003418;EVM0008428;EVM0022138;EVM0007731;EVM0008309;EVM0013142;EVM0011882;EVM0010865;EVM0012067;EVM0008114;EVM0016969;EVM0015946;EVM0003493;EVM0012306;EVM0020116;EVM0002319;EVM0006905;EVM0011486;EVM0011078;EVM0022697;EVM0018997;EVM0007691;EVM0001669;EVM0023877;EVM0003666;EVM0016059;EVM0005879;EVM0011797;EVM0003939;EVM0023903;EVM0008185;EVM0019124;EVM…
GO:0043085	positive regulation of catalytic activity	0.26	biological_process	EVM0003283;EVM0015490;EVM0012067;EVM0019432;EVM0017312;EVM0008669;EVM0022208;EVM0007729;EVM0015281;EVM0005161
GO:0051704	multi-organism process	0.264	biological_process	EVM0016555;EVM0006441;EVM0022077;EVM0004150;EVM0001748;EVM0008428;EVM0000338;EVM0009831;EVM0003526;EVM0013142;EVM0007887;EVM0012067;EVM0003824;EVM0008114;EVM0014780;EVM0021498;EVM0001180;EVM0003493;EVM0015536;EVM0021375;EVM0006905;EVM0014242;EVM0021717;EVM0023231;EVM0011486;EVM0007444;EVM0014754;EVM0019142;EVM0003626;EVM0000963;EVM0013822;EVM0023877;EVM0009131;EVM0016059;EVM0008662;EVM0022208;EVM…
GO:0010646	regulation of cell communication	0.264	biological_process	EVM0003283;EVM0015490;EVM0008764;EVM0012067;EVM0019432;EVM0023248;EVM0021375;EVM0019929;EVM0001669;EVM0023101;EVM0022208;EVM0006216;EVM0007823;EVM0007729;EVM0015281;EVM0017806
GO:1902275	regulation of chromatin organization	0.264	biological_process	EVM0007731;EVM0017877;EVM0020274;EVM0015286;EVM0012359
GO:0045037	protein import into chloroplast stroma	0.272	biological_process	EVM0002319;EVM0023313;EVM0024064;EVM0015217
GO:0005886	plasma membrane	0.278	cellular_component	EVM0016555;EVM0016827;EVM0022647;EVM0004150;EVM0012513;EVM0016865;EVM0016210;EVM0016359;EVM0022382;EVM0007518;EVM0023801;EVM0009831;EVM0003526;EVM0008309;EVM0024425;EVM0003224;EVM0007887;EVM0011962;EVM0008764;EVM0002453;EVM0012067;EVM0019536;EVM0013685;EVM0011136;EVM0019871;EVM0016732;EVM0022534;EVM0013824;EVM0008296;EVM0010674;EVM0006166;EVM0021498;EVM0020683;EVM0009637;EVM0006017;EVM0003493;EVM…
GO:0030674	protein binding, bridging	0.278	molecular_function	EVM0003283;EVM0019432;EVM0015281
GO:0055001	muscle cell development	0.278	biological_process	EVM0012067;EVM0020662;EVM0007729
GO:0055002	striated muscle cell development	0.278	biological_process	EVM0012067;EVM0020662;EVM0007729
GO:0017015	regulation of transforming growth factor beta receptor signaling pathway	0.278	biological_process	EVM0003283;EVM0019432;EVM0015281
GO:0051146	striated muscle cell differentiation	0.278	biological_process	EVM0012067;EVM0020662;EVM0007729
GO:0006887	exocytosis	0.278	biological_process	EVM0003283;EVM0019432;EVM0015281
GO:0090596	sensory organ morphogenesis	0.278	biological_process	EVM0012067;EVM0007729;EVM0015286
GO:0030512	negative regulation of transforming growth factor beta receptor signaling pathway	0.278	biological_process	EVM0003283;EVM0019432;EVM0015281
GO:0031034	myosin filament assembly	0.278	biological_process	EVM0012067;EVM0020662;EVM0007729
GO:0031033	myosin filament organization	0.278	biological_process	EVM0012067;EVM0020662;EVM0007729
GO:1903845	negative regulation of cellular response to transforming growth factor beta stimulus	0.278	biological_process	EVM0003283;EVM0019432;EVM0015281
GO:1903844	regulation of cellular response to transforming growth factor beta stimulus	0.278	biological_process	EVM0003283;EVM0019432;EVM0015281
GO:0090101	negative regulation of transmembrane receptor protein serine/threonine kinase signaling pathway	0.278	biological_process	EVM0003283;EVM0019432;EVM0015281
GO:0001745	compound eye morphogenesis	0.278	biological_process	EVM0012067;EVM0007729;EVM0015286
GO:0043022	ribosome binding	0.278	molecular_function	EVM0003283;EVM0019432;EVM0015281
GO:0071688	striated muscle myosin thick filament assembly	0.278	biological_process	EVM0012067;EVM0020662;EVM0007729
GO:0045055	regulated exocytosis	0.278	biological_process	EVM0003283;EVM0019432;EVM0015281
GO:0030239	myofibril assembly	0.278	biological_process	EVM0012067;EVM0020662;EVM0007729
GO:0048592	eye morphogenesis	0.278	biological_process	EVM0012067;EVM0007729;EVM0015286
GO:0040011	locomotion	0.318	biological_process	EVM0010431;EVM0003283;EVM0012067;EVM0020662;EVM0008114;EVM0002650;EVM0006905;EVM0008185;EVM0007729;EVM0015281
GO:0031323	regulation of cellular metabolic process	0.324	biological_process	EVM0019582;EVM0009694;EVM0000162;EVM0006441;EVM0010431;EVM0003283;EVM0017298;EVM0010590;EVM0023073;EVM0020160;EVM0000338;EVM0007731;EVM0015490;EVM0024420;EVM0007887;EVM0012067;EVM0005326;EVM0019432;EVM0013685;EVM0021236;EVM0008114;EVM0023248;EVM0002036;EVM0000733;EVM0010674;EVM0015946;EVM0006905;EVM0019929;EVM0022697;EVM0019142;EVM0023304;EVM0013354;EVM0010051;EVM0018997;EVM0017312;EVM0020807;EVM…
GO:0009846	pollen germination	0.332	biological_process	EVM0004150;EVM0013142;EVM0014780;EVM0003493;EVM0023231;EVM0023877;EVM0001830
GO:0016032	viral process	0.332	biological_process	EVM0016555;EVM0006441;EVM0021498;EVM0006905;EVM0021717;EVM0014754;EVM0006711;EVM0008597;EVM0000299;EVM0004060;EVM0016092
GO:0042981	regulation of apoptotic process	0.338	biological_process	EVM0003283;EVM0012067;EVM0019432;EVM0007729;EVM0015286;EVM0015281
GO:0003729	mRNA binding	0.348	molecular_function	EVM0003460;EVM0012067;EVM0008114;EVM0013354;EVM0023585;EVM0007045;EVM0007729
GO:0001932	regulation of protein phosphorylation	0.36	biological_process	EVM0003283;EVM0015490;EVM0012067;EVM0019432;EVM0008669;EVM0022208;EVM0007729;EVM0015281
GO:0055065	metal ion homeostasis	0.36	biological_process	EVM0000162;EVM0022547;EVM0022534;EVM0006860;EVM0023231;EVM0011390;EVM0015677;EVM0014049;EVM0013575
GO:0010015	root morphogenesis	0.36	biological_process	EVM0021555;EVM0001748;EVM0022341;EVM0021236;EVM0021375;EVM0011486;EVM0022697;EVM0001669;EVM0002756;EVM0003939;EVM0007768;EVM0022812
GO:0031935	regulation of chromatin silencing	0.37	biological_process	EVM0017877;EVM0020274;EVM0015286;EVM0012359
GO:0030968	endoplasmic reticulum unfolded protein response	0.37	biological_process	EVM0003283;EVM0019432;EVM0007950;EVM0015281
GO:0045137	development of primary sexual characteristics	0.37	biological_process	EVM0012067;EVM0006905;EVM0008185;EVM0007729
GO:0005783	endoplasmic reticulum	0.386	cellular_component	EVM0016559;EVM0006276;EVM0003283;EVM0022547;EVM0016210;EVM0022382;EVM0024425;EVM0020866;EVM0008764;EVM0010865;EVM0019432;EVM0003824;EVM0004184;EVM0012449;EVM0006860;EVM0014051;EVM0023231;EVM0012336;EVM0003037;EVM0016653;EVM0000966;EVM0020266;EVM0001199;EVM0009144;EVM0012763;EVM0008567;EVM0009564;EVM0011337;EVM0017015;EVM0006062;EVM0007950;EVM0022141;EVM0007768;EVM0013495;EVM0022776;EVM0015281;EVM…
GO:0009798	axis specification	0.386	biological_process	EVM0010865;EVM0012067;EVM0008114;EVM0000733;EVM0001669;EVM0001830;EVM0007729
GO:0050794	regulation of cellular process	0.392	biological_process	EVM0019582;EVM0009694;EVM0000162;EVM0006441;EVM0010431;EVM0003283;EVM0017298;EVM0010590;EVM0023073;EVM0004109;EVM0020160;EVM0000338;EVM0003526;EVM0007731;EVM0008309;EVM0015490;EVM0011882;EVM0024420;EVM0007887;EVM0008764;EVM0012067;EVM0005326;EVM0019432;EVM0013685;EVM0021236;EVM0008114;EVM0023248;EVM0002036;EVM0000733;EVM0020503;EVM0010674;EVM0015946;EVM0002650;EVM0015439;EVM0021375;EVM0016615;EVM…
GO:0030662	coated vesicle membrane	0.394	cellular_component	EVM0003852;EVM0000862;EVM0024534;EVM0018065;EVM0002060
GO:0012506	vesicle membrane	0.41	cellular_component	EVM0001748;EVM0003852;EVM0000862;EVM0020437;EVM0001669;EVM0024534;EVM0018065;EVM0002060
GO:0009793	embryo development ending in seed dormancy	0.416	biological_process	EVM0019582;EVM0003418;EVM0011882;EVM0010865;EVM0015946;EVM0012306;EVM0020116;EVM0002319;EVM0007691;EVM0001669;EVM0003939;EVM0019124;EVM0005752;EVM0001830;EVM0014635;EVM0021600;EVM0017154;EVM0008896
GO:0080008	Cul4-RING E3 ubiquitin ligase complex	0.416	cellular_component	EVM0003418;EVM0011882;EVM0014780;EVM0008858;EVM0015062;EVM0002803;EVM0000540;EVM0017154;EVM0006722;EVM0002069
GO:0044265	cellular macromolecule catabolic process	0.424	biological_process	EVM0001082;EVM0003283;EVM0013200;EVM0003526;EVM0019432;EVM0008114;EVM0013638;EVM0001199;EVM0024152;EVM0003939;EVM0023317;EVM0018295;EVM0015281
GO:0022414	reproductive process	0.446	biological_process	EVM0019582;EVM0004150;EVM0010590;EVM0001748;EVM0003418;EVM0008428;EVM0022138;EVM0007731;EVM0008309;EVM0013142;EVM0011882;EVM0010865;EVM0012067;EVM0008114;EVM0014780;EVM0016969;EVM0015946;EVM0003493;EVM0012306;EVM0020116;EVM0002319;EVM0006905;EVM0023231;EVM0018450;EVM0011486;EVM0011078;EVM0022697;EVM0018997;EVM0007691;EVM0001669;EVM0023877;EVM0003666;EVM0016059;EVM0005879;EVM0011797;EVM0003939;EVM…
GO:0006102	isocitrate metabolic process	0.446	biological_process	EVM0007045;EVM0007047;EVM0011111
GO:0015086	cadmium ion transmembrane transporter activity	0.446	molecular_function	EVM0022534;EVM0019142;EVM0014049
GO:0055071	manganese ion homeostasis	0.446	biological_process	EVM0022534;EVM0006860;EVM0011390
GO:0070574	cadmium ion transmembrane transport	0.446	biological_process	EVM0022534;EVM0019142;EVM0014049
GO:0043021	ribonucleoprotein complex binding	0.446	molecular_function	EVM0003283;EVM0019432;EVM0015281
GO:0060090	binding, bridging	0.446	molecular_function	EVM0003283;EVM0019432;EVM0015281
GO:0090092	regulation of transmembrane receptor protein serine/threonine kinase signaling pathway	0.446	biological_process	EVM0003283;EVM0019432;EVM0015281
GO:0006984	ER-nucleus signaling pathway	0.496	biological_process	EVM0003283;EVM0019432;EVM0007950;EVM0015281
GO:0016607	nuclear speck	0.506	cellular_component	EVM0020662;EVM0008114;EVM0013354;EVM0016576;EVM0023101;EVM0010888
GO:0016246	RNA interference	0.506	biological_process	EVM0003283;EVM0021361;EVM0003526;EVM0001180;EVM0010888;EVM0015281
GO:2000377	regulation of reactive oxygen species metabolic process	0.506	biological_process	EVM0012067;EVM0023248;EVM0019929;EVM0017312;EVM0010366;EVM0007729
GO:0016787	hydrolase activity	0.524	molecular_function	EVM0010959;EVM0016827;EVM0000162;EVM0003283;EVM0020541;EVM0012067;EVM0005326;EVM0019432;EVM0020662;EVM0003824;EVM0021565;EVM0008114;EVM0010674;EVM0015439;EVM0021370;EVM0006860;EVM0011776;EVM0007120;EVM0023231;EVM0017795;EVM0011390;EVM0002943;EVM0019668;EVM0000966;EVM0017877;EVM0019286;EVM0011199;EVM0021489;EVM0005879;EVM0014049;EVM0006217;EVM0020030;EVM0011386;EVM0008185;EVM0015972;EVM0005725;EVM…
GO:0006511	ubiquitin-dependent protein catabolic process	0.526	biological_process	EVM0001082;EVM0003283;EVM0019432;EVM0013638;EVM0001199;EVM0024152;EVM0023317;EVM0018295;EVM0015281
GO:0048364	root development	0.526	biological_process	EVM0000162;EVM0021555;EVM0001748;EVM0004109;EVM0007887;EVM0022341;EVM0021236;EVM0021375;EVM0011486;EVM0003100;EVM0022697;EVM0011390;EVM0001669;EVM0002756;EVM0003939;EVM0007768;EVM0007823;EVM0008896;EVM0022812
GO:0051338	regulation of transferase activity	0.526	biological_process	EVM0003283;EVM0015490;EVM0012067;EVM0019432;EVM0008669;EVM0022208;EVM0007729;EVM0015281
GO:0055076	transition metal ion homeostasis	0.528	biological_process	EVM0000162;EVM0022534;EVM0006860;EVM0011390;EVM0015677;EVM0014049
GO:0022622	root system development	0.53	biological_process	EVM0000162;EVM0021555;EVM0001748;EVM0004109;EVM0007887;EVM0022341;EVM0021236;EVM0021375;EVM0011486;EVM0003100;EVM0022697;EVM0011390;EVM0001669;EVM0002756;EVM0003939;EVM0007768;EVM0007823;EVM0008896;EVM0022812
GO:0033043	regulation of organelle organization	0.53	biological_process	EVM0007731;EVM0008114;EVM0012288;EVM0017877;EVM0008185;EVM0008184;EVM0005725;EVM0020274;EVM0015286;EVM0012359
GO:0035770	ribonucleoprotein granule	0.534	cellular_component	EVM0013200;EVM0003526;EVM0003939;EVM0018978;EVM0003978
GO:0036464	cytoplasmic ribonucleoprotein granule	0.534	cellular_component	EVM0013200;EVM0003526;EVM0003939;EVM0018978;EVM0003978
GO:0048585	negative regulation of response to stimulus	0.542	biological_process	EVM0003283;EVM0011882;EVM0008764;EVM0019432;EVM0023248;EVM0021375;EVM0019929;EVM0019142;EVM0023101;EVM0006216;EVM0007823;EVM0015281
GO:0045088	regulation of innate immune response	0.548	biological_process	EVM0007731;EVM0012067;EVM0012902;EVM0023101;EVM0003115;EVM0007729;EVM0017806
GO:0007005	mitochondrion organization	0.548	biological_process	EVM0015227;EVM0012067;EVM0010674;EVM0023340;EVM0020895;EVM0005725;EVM0007729
GO:0031301	integral component of organelle membrane	0.548	cellular_component	EVM0003283;EVM0019432;EVM0006860;EVM0007950;EVM0007768;EVM0015217;EVM0015281
GO:0044403	symbiosis, encompassing mutualism through parasitism	0.552	biological_process	EVM0016555;EVM0006441;EVM0021498;EVM0006905;EVM0021717;EVM0014754;EVM0006711;EVM0008597;EVM0000299;EVM0004060;EVM0016092
GO:0043632	modification-dependent macromolecule catabolic process	0.554	biological_process	EVM0001082;EVM0003283;EVM0019432;EVM0013638;EVM0001199;EVM0024152;EVM0023317;EVM0018295;EVM0015281
GO:0019941	modification-dependent protein catabolic process	0.554	biological_process	EVM0001082;EVM0003283;EVM0019432;EVM0013638;EVM0001199;EVM0024152;EVM0023317;EVM0018295;EVM0015281
GO:0036503	ERAD pathway	0.554	biological_process	EVM0003283;EVM0019432;EVM0001199;EVM0015281
GO:0030433	ubiquitin-dependent ERAD pathway	0.554	biological_process	EVM0003283;EVM0019432;EVM0001199;EVM0015281
GO:0033044	regulation of chromosome organization	0.57	biological_process	EVM0007731;EVM0017877;EVM0005725;EVM0020274;EVM0015286;EVM0012359
GO:0031461	cullin-RING ubiquitin ligase complex	0.574	cellular_component	EVM0003418;EVM0011882;EVM0014780;EVM0008858;EVM0015062;EVM0015286;EVM0002803;EVM0000540;EVM0017154;EVM0006722;EVM0002069
GO:0060548	negative regulation of cell death	0.574	biological_process	EVM0003283;EVM0008309;EVM0012067;EVM0019432;EVM0007729;EVM0015286;EVM0015281
GO:0042325	regulation of phosphorylation	0.576	biological_process	EVM0003283;EVM0015490;EVM0012067;EVM0019432;EVM0008669;EVM0022208;EVM0007729;EVM0015281
GO:0034976	response to endoplasmic reticulum stress	0.58	biological_process	EVM0003283;EVM0019432;EVM0001199;EVM0007950;EVM0015281
GO:0044700	single organism signaling	0.598	biological_process	EVM0010431;EVM0003283;EVM0003526;EVM0008309;EVM0015490;EVM0011882;EVM0007887;EVM0012067;EVM0019432;EVM0013685;EVM0008114;EVM0023248;EVM0020503;EVM0001180;EVM0021375;EVM0019929;EVM0024306;EVM0023304;EVM0001669;EVM0021489;EVM0013488;EVM0022208;EVM0006216;EVM0007950;EVM0024441;EVM0012502;EVM0019124;EVM0003115;EVM0007823;EVM0007729;EVM0015281;EVM0013645;EVM0013575
GO:0023052	signaling	0.6	biological_process	EVM0010431;EVM0003283;EVM0003526;EVM0008309;EVM0015490;EVM0011882;EVM0007887;EVM0012067;EVM0019432;EVM0013685;EVM0008114;EVM0023248;EVM0020503;EVM0001180;EVM0021375;EVM0019929;EVM0024306;EVM0023304;EVM0001669;EVM0021489;EVM0013488;EVM0022208;EVM0006216;EVM0007950;EVM0024441;EVM0012502;EVM0019124;EVM0003115;EVM0007823;EVM0007729;EVM0015281;EVM0013645;EVM0013575
GO:0099402	plant organ development	0.602	biological_process	EVM0000162;EVM0021555;EVM0001748;EVM0004109;EVM0022138;EVM0007731;EVM0008309;EVM0011882;EVM0007887;EVM0022341;EVM0021236;EVM0021375;EVM0018450;EVM0011486;EVM0011078;EVM0003100;EVM0022697;EVM0011390;EVM0001669;EVM0023877;EVM0016059;EVM0002756;EVM0003939;EVM0024441;EVM0007768;EVM0007823;EVM0001830;EVM0022776;EVM0017154;EVM0008896;EVM0005161;EVM0022812
GO:0031526	brush border membrane	0.602	cellular_component	EVM0012067;EVM0007729
GO:0045466	R7 cell differentiation	0.602	biological_process	EVM0012067;EVM0007729
GO:0052742	phosphatidylinositol kinase activity	0.602	molecular_function	EVM0001748;EVM0005752
GO:0001752	compound eye photoreceptor fate commitment	0.602	biological_process	EVM0012067;EVM0007729
GO:0050870	positive regulation of T cell activation	0.602	biological_process	EVM0012067;EVM0007729
GO:0006936	muscle contraction	0.602	biological_process	EVM0012067;EVM0007729
GO:0060491	regulation of cell projection assembly	0.602	biological_process	EVM0012067;EVM0007729
GO:0030235	nitric-oxide synthase regulator activity	0.602	molecular_function	EVM0012067;EVM0007729
GO:0031897	Tic complex	0.602	cellular_component	EVM0023313;EVM0024064
GO:0009530	primary cell wall	0.602	cellular_component	EVM0007944;EVM0004830
GO:0060969	negative regulation of gene silencing	0.602	biological_process	EVM0017877;EVM0012359
GO:0055117	regulation of cardiac muscle contraction	0.602	biological_process	EVM0012067;EVM0007729
GO:0031936	negative regulation of chromatin silencing	0.602	biological_process	EVM0017877;EVM0012359
GO:0045974	regulation of translation, ncRNA-mediated	0.602	biological_process	EVM0018978;EVM0003978
GO:0033160	positive regulation of protein import into nucleus, translocation	0.602	biological_process	EVM0012067;EVM0007729
GO:0001890	placenta development	0.602	biological_process	EVM0012067;EVM0007729
GO:0008016	regulation of heart contraction	0.602	biological_process	EVM0012067;EVM0007729
GO:0031253	cell projection membrane	0.602	cellular_component	EVM0012067;EVM0007729
GO:0022410	circadian sleep/wake cycle process	0.602	biological_process	EVM0012067;EVM0007729
GO:0008293	torso signaling pathway	0.602	biological_process	EVM0012067;EVM0007729
GO:0040033	negative regulation of translation, ncRNA-mediated	0.602	biological_process	EVM0018978;EVM0003978
GO:0005903	brush border	0.602	cellular_component	EVM0012067;EVM0007729
GO:0060452	positive regulation of cardiac muscle contraction	0.602	biological_process	EVM0012067;EVM0007729
GO:0048663	neuron fate commitment	0.602	biological_process	EVM0012067;EVM0007729
GO:1904407	positive regulation of nitric oxide metabolic process	0.602	biological_process	EVM0012067;EVM0007729
GO:0045815	positive regulation of gene expression, epigenetic	0.602	biological_process	EVM0017877;EVM0012359
GO:0005049	nuclear export signal receptor activity	0.602	molecular_function	EVM0002650;EVM0002650
GO:0098862	cluster of actin-based cell projections	0.602	cellular_component	EVM0012067;EVM0007729
GO:0030241	skeletal muscle myosin thick filament assembly	0.602	biological_process	EVM0012067;EVM0007729
GO:0030240	skeletal muscle thin filament assembly	0.602	biological_process	EVM0012067;EVM0007729
GO:0010658	striated muscle cell apoptotic process	0.602	biological_process	EVM0012067;EVM0007729
GO:0010659	cardiac muscle cell apoptotic process	0.602	biological_process	EVM0012067;EVM0007729
GO:0010657	muscle cell apoptotic process	0.602	biological_process	EVM0012067;EVM0007729
GO:0019103	pyrimidine nucleotide binding	0.602	molecular_function	EVM0012067;EVM0007729
GO:0001884	pyrimidine nucleoside binding	0.602	molecular_function	EVM0012067;EVM0007729
GO:0045785	positive regulation of cell adhesion	0.602	biological_process	EVM0012067;EVM0007729
GO:0007465	R7 cell fate commitment	0.602	biological_process	EVM0012067;EVM0007729
GO:0050881	musculoskeletal movement	0.602	biological_process	EVM0012067;EVM0007729
GO:1902745	positive regulation of lamellipodium organization	0.602	biological_process	EVM0012067;EVM0007729
GO:1902743	regulation of lamellipodium organization	0.602	biological_process	EVM0012067;EVM0007729
GO:0045621	positive regulation of lymphocyte differentiation	0.602	biological_process	EVM0012067;EVM0007729
GO:0051249	regulation of lymphocyte activation	0.602	biological_process	EVM0012067;EVM0007729
GO:0032564	dATP binding	0.602	molecular_function	EVM0012067;EVM0007729
GO:0045989	positive regulation of striated muscle contraction	0.602	biological_process	EVM0012067;EVM0007729
GO:0048769	sarcomerogenesis	0.602	biological_process	EVM0012067;EVM0007729
GO:0045187	regulation of circadian sleep/wake cycle, sleep	0.602	biological_process	EVM0012067;EVM0007729
GO:1903708	positive regulation of hemopoiesis	0.602	biological_process	EVM0012067;EVM0007729
GO:0005705	polytene chromosome interband	0.602	cellular_component	EVM0012067;EVM0007729
GO:0045040	protein import into mitochondrial outer membrane	0.602	biological_process	EVM0012067;EVM0007729
GO:0006942	regulation of striated muscle contraction	0.602	biological_process	EVM0012067;EVM0007729
GO:1903524	positive regulation of blood circulation	0.602	biological_process	EVM0012067;EVM0007729
GO:1903522	regulation of blood circulation	0.602	biological_process	EVM0012067;EVM0007729
GO:0050829	defense response to Gram-negative bacterium	0.602	biological_process	EVM0015536;EVM0018091
GO:0050795	regulation of behavior	0.602	biological_process	EVM0012067;EVM0007729
GO:0050863	regulation of T cell activation	0.602	biological_process	EVM0012067;EVM0007729
GO:0045933	positive regulation of muscle contraction	0.602	biological_process	EVM0012067;EVM0007729
GO:0002134	UTP binding	0.602	molecular_function	EVM0012067;EVM0007729
GO:0002135	CTP binding	0.602	molecular_function	EVM0012067;EVM0007729
GO:0043044	ATP-dependent chromatin remodeling	0.602	biological_process	EVM0005879;EVM0014351
GO:0032092	positive regulation of protein binding	0.602	biological_process	EVM0012067;EVM0007729
GO:0006937	regulation of muscle contraction	0.602	biological_process	EVM0012067;EVM0007729
GO:0097285	obsolete cell-type specific apoptotic process	0.602	biological_process	EVM0012067;EVM0007729
GO:0090257	regulation of muscle system process	0.602	biological_process	EVM0012067;EVM0007729
GO:0060338	regulation of type I interferon-mediated signaling pathway	0.602	biological_process	EVM0012067;EVM0007729
GO:0005684	U2-type spliceosomal complex	0.602	cellular_component	EVM0005479;EVM0019863
GO:0005682	U5 snRNP	0.602	cellular_component	EVM0020662;EVM0008185
GO:0001764	neuron migration	0.602	biological_process	EVM0012067;EVM0007729
GO:0050865	regulation of cell activation	0.602	biological_process	EVM0012067;EVM0007729
GO:0050867	positive regulation of cell activation	0.602	biological_process	EVM0012067;EVM0007729
GO:0033158	regulation of protein import into nucleus, translocation	0.602	biological_process	EVM0012067;EVM0007729
GO:0035278	miRNA mediated inhibition of translation	0.602	biological_process	EVM0018978;EVM0003978
GO:0002694	regulation of leukocyte activation	0.602	biological_process	EVM0012067;EVM0007729
GO:0002696	positive regulation of leukocyte activation	0.602	biological_process	EVM0012067;EVM0007729
GO:1903039	positive regulation of leukocyte cell-cell adhesion	0.602	biological_process	EVM0012067;EVM0007729
GO:1903037	regulation of leukocyte cell-cell adhesion	0.602	biological_process	EVM0012067;EVM0007729
GO:0046552	photoreceptor cell fate commitment	0.602	biological_process	EVM0012067;EVM0007729
GO:0050999	regulation of nitric-oxide synthase activity	0.602	biological_process	EVM0012067;EVM0007729
GO:0031674	I band	0.602	cellular_component	EVM0012067;EVM0007729
GO:0051131	chaperone-mediated protein complex assembly	0.602	biological_process	EVM0012067;EVM0007729
GO:0022407	regulation of cell-cell adhesion	0.602	biological_process	EVM0012067;EVM0007729
GO:0022409	positive regulation of cell-cell adhesion	0.602	biological_process	EVM0012067;EVM0007729
GO:0010591	regulation of lamellipodium assembly	0.602	biological_process	EVM0012067;EVM0007729
GO:0010592	positive regulation of lamellipodium assembly	0.602	biological_process	EVM0012067;EVM0007729
GO:0040024	dauer larval development	0.602	biological_process	EVM0012067;EVM0007729
GO:0030018	Z disc	0.602	cellular_component	EVM0012067;EVM0007729
GO:0042706	eye photoreceptor cell fate commitment	0.602	biological_process	EVM0012067;EVM0007729
GO:1903428	positive regulation of reactive oxygen species biosynthetic process	0.602	biological_process	EVM0012067;EVM0007729
GO:1903426	regulation of reactive oxygen species biosynthetic process	0.602	biological_process	EVM0012067;EVM0007729
GO:0045580	regulation of T cell differentiation	0.602	biological_process	EVM0012067;EVM0007729
GO:0045582	positive regulation of T cell differentiation	0.602	biological_process	EVM0012067;EVM0007729
GO:0045583	regulation of cytotoxic T cell differentiation	0.602	biological_process	EVM0012067;EVM0007729
GO:0045585	positive regulation of cytotoxic T cell differentiation	0.602	biological_process	EVM0012067;EVM0007729
GO:0042745	circadian sleep/wake cycle	0.602	biological_process	EVM0012067;EVM0007729
GO:0042749	regulation of circadian sleep/wake cycle	0.602	biological_process	EVM0012067;EVM0007729
GO:0030911	TPR domain binding	0.602	molecular_function	EVM0012067;EVM0007729
GO:0003746	translation elongation factor activity	0.602	molecular_function	EVM0020662;EVM0020895
GO:0007008	outer mitochondrial membrane organization	0.602	biological_process	EVM0012067;EVM0007729
GO:0003009	skeletal muscle contraction	0.602	biological_process	EVM0012067;EVM0007729
GO:0090151	establishment of protein localization to mitochondrial membrane	0.602	biological_process	EVM0012067;EVM0007729
GO:0032558	adenyl deoxyribonucleotide binding	0.602	molecular_function	EVM0012067;EVM0007729
GO:0032554	purine deoxyribonucleotide binding	0.602	molecular_function	EVM0012067;EVM0007729
GO:0032557	pyrimidine ribonucleotide binding	0.602	molecular_function	EVM0012067;EVM0007729
GO:0032551	pyrimidine ribonucleoside binding	0.602	molecular_function	EVM0012067;EVM0007729
GO:0032552	deoxyribonucleotide binding	0.602	molecular_function	EVM0012067;EVM0007729
GO:0006941	striated muscle contraction	0.602	biological_process	EVM0012067;EVM0007729
GO:0045619	regulation of lymphocyte differentiation	0.602	biological_process	EVM0012067;EVM0007729
GO:1902107	positive regulation of leukocyte differentiation	0.602	biological_process	EVM0012067;EVM0007729
GO:1902105	regulation of leukocyte differentiation	0.602	biological_process	EVM0012067;EVM0007729
GO:0045429	positive regulation of nitric oxide biosynthetic process	0.602	biological_process	EVM0012067;EVM0007729
GO:0045428	regulation of nitric oxide biosynthetic process	0.602	biological_process	EVM0012067;EVM0007729
GO:0045823	positive regulation of heart contraction	0.602	biological_process	EVM0012067;EVM0007729
GO:0051251	positive regulation of lymphocyte activation	0.602	biological_process	EVM0012067;EVM0007729
GO:0014866	skeletal myofibril assembly	0.602	biological_process	EVM0012067;EVM0007729
GO:0051130	positive regulation of cellular component organization	0.794	biological_process	EVM0007731;EVM0012067;EVM0012288;EVM0008184;EVM0005725;EVM0007729
GO:0042742	defense response to bacterium	0.8	biological_process	EVM0022077;EVM0003526;EVM0003824;EVM0015536;EVM0021375;EVM0007444;EVM0014754;EVM0019142;EVM0003626;EVM0016059;EVM0008662;EVM0022208;EVM0000252;EVM0018091;EVM0003115;EVM0007064;EVM0005161;EVM0016092
GO:0018205	peptidyl-lysine modification	0.8	biological_process	EVM0010590;EVM0022138;EVM0007731;EVM0016969;EVM0022697;EVM0023101;EVM0020030;EVM0005686
GO:0031300	intrinsic component of organelle membrane	0.802	cellular_component	EVM0003283;EVM0019432;EVM0006860;EVM0007950;EVM0007768;EVM0015217;EVM0015281
GO:0090287	regulation of cellular response to growth factor stimulus	0.802	biological_process	EVM0003283;EVM0019432;EVM0015281
GO:0090288	negative regulation of cellular response to growth factor stimulus	0.802	biological_process	EVM0003283;EVM0019432;EVM0015281
GO:0001654	eye development	0.802	biological_process	EVM0012067;EVM0007729;EVM0015286
GO:0031330	negative regulation of cellular catabolic process	0.802	biological_process	EVM0012067;EVM0005752;EVM0007729
GO:0048749	compound eye development	0.802	biological_process	EVM0012067;EVM0007729;EVM0015286
GO:0007420	brain development	0.802	biological_process	EVM0003283;EVM0019432;EVM0015281
GO:0044702	single organism reproductive process	0.814	biological_process	EVM0019582;EVM0004150;EVM0001748;EVM0003418;EVM0008428;EVM0022138;EVM0007731;EVM0008309;EVM0013142;EVM0011882;EVM0010865;EVM0012067;EVM0008114;EVM0014780;EVM0015946;EVM0003493;EVM0012306;EVM0020116;EVM0002319;EVM0006905;EVM0023231;EVM0018450;EVM0011486;EVM0011078;EVM0022697;EVM0018997;EVM0007691;EVM0001669;EVM0023877;EVM0003666;EVM0016059;EVM0005879;EVM0003939;EVM0008185;EVM0019124;EVM0014766;EVM…
GO:0044419	interspecies interaction between organisms	0.814	biological_process	EVM0016555;EVM0006441;EVM0021498;EVM0006905;EVM0021717;EVM0014754;EVM0006711;EVM0008597;EVM0000299;EVM0004060;EVM0016092
GO:0044085	cellular component biogenesis	0.814	biological_process	EVM0007887;EVM0006954;EVM0012067;EVM0020662;EVM0008114;EVM0020116;EVM0021370;EVM0011776;EVM0017130;EVM0021002;EVM0013354;EVM0009859;EVM0005309;EVM0006448;EVM0015062;EVM0023989;EVM0005715;EVM0015640;EVM0008185;EVM0005725;EVM0007729;EVM0013010;EVM0002803;EVM0019863;EVM0022812
GO:0051170	nuclear import	0.814	biological_process	EVM0021117;EVM0010674;EVM0000741;EVM0023989;EVM0008896
GO:0048581	negative regulation of post-embryonic development	0.822	biological_process	EVM0023073;EVM0007731;EVM0011882;EVM0023248;EVM0002036;EVM0014754;EVM0023101;EVM0016059;EVM0016092
GO:0004004	ATP-dependent RNA helicase activity	0.822	molecular_function	EVM0008114;EVM0011776;EVM0008185;EVM0019863
GO:0007165	signal transduction	0.836	biological_process	EVM0010431;EVM0003283;EVM0003526;EVM0008309;EVM0015490;EVM0011882;EVM0007887;EVM0012067;EVM0019432;EVM0013685;EVM0008114;EVM0023248;EVM0020503;EVM0021375;EVM0019929;EVM0024306;EVM0023304;EVM0001669;EVM0021489;EVM0013488;EVM0022208;EVM0006216;EVM0007950;EVM0024441;EVM0012502;EVM0019124;EVM0003115;EVM0007823;EVM0007729;EVM0015281;EVM0013645;EVM0013575
GO:0051603	proteolysis involved in cellular protein catabolic process	0.836	biological_process	EVM0001082;EVM0003283;EVM0019432;EVM0013638;EVM0001199;EVM0024152;EVM0023317;EVM0018295;EVM0015281
GO:0051093	negative regulation of developmental process	0.836	biological_process	EVM0019582;EVM0023073;EVM0004109;EVM0007731;EVM0011882;EVM0021236;EVM0023248;EVM0002036;EVM0014754;EVM0023101;EVM0016059;EVM0016092
GO:0048646	anatomical structure formation involved in morphogenesis	0.836	biological_process	EVM0010590;EVM0021555;EVM0007731;EVM0008309;EVM0012067;EVM0020662;EVM0011486;EVM0016059;EVM0005879;EVM0009718;EVM0009564;EVM0007729;EVM0014351
GO:0030163	protein catabolic process	0.838	biological_process	EVM0001082;EVM0003283;EVM0019432;EVM0013638;EVM0001199;EVM0024152;EVM0006711;EVM0023317;EVM0018295;EVM0015281
GO:0042594	response to starvation	0.838	biological_process	EVM0003283;EVM0003460;EVM0010865;EVM0019432;EVM0023231;EVM0000966;EVM0008247;EVM0023101;EVM0008669;EVM0015281
GO:0071359	cellular response to dsRNA	0.838	biological_process	EVM0010431;EVM0021361;EVM0001180;EVM0007250;EVM0010888
GO:0043331	response to dsRNA	0.838	biological_process	EVM0010431;EVM0021361;EVM0001180;EVM0007250;EVM0010888
GO:0031050	dsRNA fragmentation	0.838	biological_process	EVM0010431;EVM0021361;EVM0001180;EVM0007250;EVM0010888
GO:0070918	production of small RNA involved in gene silencing by RNA	0.838	biological_process	EVM0010431;EVM0021361;EVM0001180;EVM0007250;EVM0010888
GO:0007399	nervous system development	0.842	biological_process	EVM0003283;EVM0012067;EVM0019432;EVM0002650;EVM0007729;EVM0015281
GO:1902494	catalytic complex	0.844	cellular_component	EVM0016559;EVM0006441;EVM0021361;EVM0003418;EVM0011882;EVM0020662;EVM0008114;EVM0014780;EVM0006905;EVM0022697;EVM0008858;EVM0022952;EVM0015062;EVM0010017;EVM0008185;EVM0015286;EVM0002803;EVM0000540;EVM0017154;EVM0019863;EVM0006722;EVM0002069
GO:0048468	cell development	0.844	biological_process	EVM0019582;EVM0004150;EVM0001748;EVM0004109;EVM0013142;EVM0012067;EVM0020662;EVM0021236;EVM0008114;EVM0003493;EVM0002650;EVM0021375;EVM0001669;EVM0024152;EVM0008185;EVM0007768;EVM0007729;EVM0000754;EVM0022812
GO:0044433	cytoplasmic vesicle part	0.844	cellular_component	EVM0008639;EVM0001748;EVM0008309;EVM0010865;EVM0003852;EVM0009312;EVM0000862;EVM0020437;EVM0011390;EVM0024534;EVM0018065;EVM0002060
GO:0045893	positive regulation of transcription, DNA-templated	0.844	biological_process	EVM0017298;EVM0023073;EVM0002036;EVM0022697;EVM0017877;EVM0016772;EVM0022208;EVM0012502;EVM0005752;EVM0005619;EVM0001115;EVM0002705;EVM0012359
GO:1903508	positive regulation of nucleic acid-templated transcription	0.844	biological_process	EVM0017298;EVM0023073;EVM0002036;EVM0022697;EVM0017877;EVM0016772;EVM0022208;EVM0012502;EVM0005752;EVM0005619;EVM0001115;EVM0002705;EVM0012359
GO:0009605	response to external stimulus	0.844	biological_process	EVM0016555;EVM0022077;EVM0003283;EVM0003460;EVM0000338;EVM0009831;EVM0003526;EVM0007887;EVM0010865;EVM0012067;EVM0019432;EVM0003824;EVM0021498;EVM0001180;EVM0015536;EVM0021375;EVM0014242;EVM0021717;EVM0023231;EVM0011486;EVM0007444;EVM0014754;EVM0019142;EVM0003626;EVM0000966;EVM0000963;EVM0001669;EVM0008247;EVM0023101;EVM0016059;EVM0008669;EVM0008662;EVM0022208;EVM0002756;EVM0000252;EVM0018091;EVM…
GO:0016604	nuclear body	0.844	cellular_component	EVM0021361;EVM0020662;EVM0008114;EVM0013354;EVM0016576;EVM0023101;EVM0010888
GO:0050776	regulation of immune response	0.844	biological_process	EVM0007731;EVM0012067;EVM0012902;EVM0023101;EVM0003115;EVM0007729;EVM0017806
GO:0016477	cell migration	0.844	biological_process	EVM0012067;EVM0006905;EVM0008185;EVM0007729
GO:0010033	response to organic substance	0.852	biological_process	EVM0013186;EVM0001903;EVM0009694;EVM0010431;EVM0003283;EVM0003460;EVM0022313;EVM0021361;EVM0009837;EVM0009831;EVM0003526;EVM0008309;EVM0011882;EVM0007887;EVM0012067;EVM0019432;EVM0008114;EVM0023248;EVM0001180;EVM0015439;EVM0021375;EVM0017982;EVM0019929;EVM0021717;EVM0011486;EVM0014021;EVM0019142;EVM0024306;EVM0023304;EVM0003626;EVM0018997;EVM0007884;EVM0011127;EVM0001669;EVM0008247;EVM0001199;EVM…
GO:0019829	cation-transporting ATPase activity	0.856	molecular_function	EVM0015439;EVM0006860;EVM0023231;EVM0011390;EVM0014049;EVM0006083
GO:0021700	developmental maturation	0.858	biological_process	EVM0001748;EVM0012067;EVM0021236;EVM0008114;EVM0021375;EVM0023231;EVM0001669;EVM0003666;EVM0007768;EVM0007729;EVM0022812
GO:0044257	cellular protein catabolic process	0.858	biological_process	EVM0001082;EVM0003283;EVM0019432;EVM0013638;EVM0001199;EVM0024152;EVM0023317;EVM0018295;EVM0015281
GO:0007154	cell communication	0.858	biological_process	EVM0010431;EVM0003283;EVM0003460;EVM0003526;EVM0008309;EVM0015490;EVM0011882;EVM0007887;EVM0012067;EVM0019432;EVM0013685;EVM0008114;EVM0023248;EVM0020503;EVM0001180;EVM0021375;EVM0019929;EVM0023231;EVM0024306;EVM0023304;EVM0000966;EVM0001669;EVM0021489;EVM0013488;EVM0008247;EVM0023101;EVM0008669;EVM0022208;EVM0006216;EVM0007950;EVM0024441;EVM0012502;EVM0019124;EVM0003115;EVM0007823;EVM0007729;EVM…
GO:0010286	heat acclimation	0.858	biological_process	EVM0002943;EVM0019668;EVM0019286;EVM0023101;EVM0005619
GO:0050817	coagulation	0.86	biological_process	EVM0003283;EVM0019432;EVM0015281
GO:0019094	pole plasm mRNA localization	0.86	biological_process	EVM0012067;EVM0008114;EVM0007729
GO:0001775	cell activation	0.86	biological_process	EVM0003283;EVM0019432;EVM0015281
GO:0007315	pole plasm assembly	0.86	biological_process	EVM0012067;EVM0008114;EVM0007729
GO:0032075	positive regulation of nuclease activity	0.86	biological_process	EVM0003283;EVM0019432;EVM0015281
GO:0060811	intracellular mRNA localization involved in anterior/posterior axis specification	0.86	biological_process	EVM0012067;EVM0008114;EVM0007729
GO:0060810	intracellular mRNA localization involved in pattern specification process	0.86	biological_process	EVM0012067;EVM0008114;EVM0007729
GO:0006987	activation of signaling protein activity involved in unfolded protein response	0.86	biological_process	EVM0003283;EVM0019432;EVM0015281
GO:0007316	pole plasm RNA localization	0.86	biological_process	EVM0012067;EVM0008114;EVM0007729
GO:0032069	regulation of nuclease activity	0.86	biological_process	EVM0003283;EVM0019432;EVM0015281
GO:0007028	cytoplasm organization	0.86	biological_process	EVM0012067;EVM0008114;EVM0007729
GO:0043531	ADP binding	0.86	molecular_function	EVM0019668;EVM0019286;EVM0005161
GO:0007599	hemostasis	0.86	biological_process	EVM0003283;EVM0019432;EVM0015281
GO:0007596	blood coagulation	0.86	biological_process	EVM0003283;EVM0019432;EVM0015281
GO:0007417	central nervous system development	0.86	biological_process	EVM0003283;EVM0019432;EVM0015281
GO:0009968	negative regulation of signal transduction	0.878	biological_process	EVM0003283;EVM0008764;EVM0019432;EVM0023248;EVM0019929;EVM0006216;EVM0007823;EVM0015281
GO:0023057	negative regulation of signaling	0.878	biological_process	EVM0003283;EVM0008764;EVM0019432;EVM0023248;EVM0019929;EVM0006216;EVM0007823;EVM0015281
GO:0043067	regulation of programmed cell death	0.878	biological_process	EVM0003283;EVM0007731;EVM0012067;EVM0019432;EVM0012902;EVM0007729;EVM0015286;EVM0015281
GO:0010648	negative regulation of cell communication	0.878	biological_process	EVM0003283;EVM0008764;EVM0019432;EVM0023248;EVM0019929;EVM0006216;EVM0007823;EVM0015281
GO:0010941	regulation of cell death	0.878	biological_process	EVM0003283;EVM0007731;EVM0008309;EVM0012067;EVM0019432;EVM0012902;EVM0007729;EVM0015286;EVM0015281
GO:0042625	ATPase coupled ion transmembrane transporter activity	0.88	molecular_function	EVM0015439;EVM0006860;EVM0023231;EVM0011390;EVM0014049;EVM0006083
GO:0000151	ubiquitin ligase complex	0.882	cellular_component	EVM0003418;EVM0011882;EVM0014780;EVM0008858;EVM0015062;EVM0015286;EVM0002803;EVM0000540;EVM0017154;EVM0006722;EVM0002069
GO:0044706	multi-multicellular organism process	0.882	biological_process	EVM0004150;EVM0001748;EVM0008428;EVM0013142;EVM0008114;EVM0014780;EVM0003493;EVM0023231;EVM0023877;EVM0008185;EVM0001830
GO:0007389	pattern specification process	0.882	biological_process	EVM0021555;EVM0004109;EVM0010865;EVM0012067;EVM0008114;EVM0000733;EVM0012306;EVM0018450;EVM0001669;EVM0005879;EVM0001830;EVM0007729;EVM0014351
GO:0030529	intracellular ribonucleoprotein complex	0.882	cellular_component	EVM0015227;EVM0013200;EVM0003526;EVM0007887;EVM0020662;EVM0008114;EVM0010674;EVM0003252;EVM0020551;EVM0011776;EVM0021717;EVM0014754;EVM0008247;EVM0012360;EVM0009715;EVM0003939;EVM0005479;EVM0008185;EVM0018978;EVM0003978;EVM0023601;EVM0019863;EVM0016092
GO:1990904	ribonucleoprotein complex	0.882	cellular_component	EVM0015227;EVM0013200;EVM0003526;EVM0007887;EVM0020662;EVM0008114;EVM0010674;EVM0003252;EVM0020551;EVM0011776;EVM0021717;EVM0014754;EVM0008247;EVM0012360;EVM0009715;EVM0003939;EVM0005479;EVM0008185;EVM0018978;EVM0003978;EVM0023601;EVM0019863;EVM0016092
GO:0006796	phosphate-containing compound metabolic process	0.882	biological_process	EVM0010959;EVM0000162;EVM0006441;EVM0003283;EVM0001748;EVM0014316;EVM0008309;EVM0015490;EVM0012067;EVM0019432;EVM0020662;EVM0008114;EVM0016732;EVM0010674;EVM0006017;EVM0015439;EVM0006860;EVM0006905;EVM0011776;EVM0023231;EVM0011390;EVM0024306;EVM0019668;EVM0019286;EVM0021489;EVM0008404;EVM0005239;EVM0005879;EVM0008669;EVM0022208;EVM0014049;EVM0010017;EVM0006216;EVM0011386;EVM0018639;EVM0008185;EVM…
GO:0030659	cytoplasmic vesicle membrane	0.882	cellular_component	EVM0001748;EVM0003852;EVM0000862;EVM0020437;EVM0024534;EVM0018065;EVM0002060
GO:0051297	centrosome organization	0.886	biological_process	EVM0003283;EVM0012067;EVM0007729;EVM0015281
GO:0007098	centrosome cycle	0.886	biological_process	EVM0003283;EVM0012067;EVM0007729;EVM0015281
GO:0031023	microtubule organizing center organization	0.886	biological_process	EVM0003283;EVM0012067;EVM0007729;EVM0015281
GO:0043414	macromolecule methylation	0.892	biological_process	EVM0006441;EVM0023073;EVM0021361;EVM0022138;EVM0007731;EVM0016969;EVM0017877;EVM0020274;EVM0012359
GO:0031399	regulation of protein modification process	0.892	biological_process	EVM0003283;EVM0007731;EVM0015490;EVM0012067;EVM0019432;EVM0008669;EVM0022208;EVM0007729;EVM0015281
GO:0055080	cation homeostasis	0.892	biological_process	EVM0000162;EVM0022547;EVM0022534;EVM0006860;EVM0023231;EVM0011390;EVM0015677;EVM0014049;EVM0013575
GO:0034605	cellular response to heat	0.892	biological_process	EVM0003460;EVM0010674;EVM0019668;EVM0019286;EVM0005619
GO:0051259	protein oligomerization	0.892	biological_process	EVM0006954;EVM0021002;EVM0009859;EVM0006448;EVM0015640
GO:0048532	anatomical structure arrangement	0.894	biological_process	EVM0019582;EVM0003283;EVM0019432;EVM0000733;EVM0003939;EVM0015281
GO:0009057	macromolecule catabolic process	0.898	biological_process	EVM0001082;EVM0003283;EVM0013200;EVM0003526;EVM0019432;EVM0008114;EVM0013638;EVM0001199;EVM0024152;EVM0003939;EVM0006711;EVM0023317;EVM0018295;EVM0015281
GO:0098771	inorganic ion homeostasis	0.898	biological_process	EVM0000162;EVM0022547;EVM0022534;EVM0006860;EVM0023231;EVM0011390;EVM0015677;EVM0014049;EVM0013575
GO:0033554	cellular response to stress	0.898	biological_process	EVM0006441;EVM0003283;EVM0003460;EVM0013984;EVM0011882;EVM0019432;EVM0008114;EVM0010674;EVM0021375;EVM0006905;EVM0023231;EVM0019142;EVM0017383;EVM0019668;EVM0000966;EVM0017877;EVM0019286;EVM0008247;EVM0001199;EVM0023101;EVM0008669;EVM0007950;EVM0005725;EVM0005619;EVM0001115;EVM0002705;EVM0015286;EVM0015281;EVM0012359;EVM0004060
GO:0043933	macromolecular complex subunit organization	0.9	biological_process	EVM0006441;EVM0006954;EVM0012067;EVM0020662;EVM0020116;EVM0017130;EVM0021002;EVM0013354;EVM0009859;EVM0006448;EVM0023989;EVM0015640;EVM0008185;EVM0005725;EVM0007729;EVM0019863
GO:0002682	regulation of immune system process	0.9	biological_process	EVM0007731;EVM0012067;EVM0012902;EVM0023101;EVM0003115;EVM0007729;EVM0017806
GO:0051171	regulation of nitrogen compound metabolic process	0.902	biological_process	EVM0019582;EVM0009694;EVM0000162;EVM0006441;EVM0010431;EVM0003283;EVM0017298;EVM0010590;EVM0023073;EVM0020160;EVM0000338;EVM0007887;EVM0012067;EVM0005326;EVM0019432;EVM0021236;EVM0008114;EVM0023248;EVM0002036;EVM0000733;EVM0010674;EVM0015946;EVM0006905;EVM0022697;EVM0023304;EVM0013354;EVM0010051;EVM0018997;EVM0020807;EVM0017877;EVM0016772;EVM0013488;EVM0023101;EVM0022208;EVM0007250;EVM0023989;EVM…
GO:0040010	positive regulation of growth rate	0.904	biological_process	EVM0006441;EVM0010431;EVM0003283;EVM0008114;EVM0002650;EVM0015281
GO:0016592	mediator complex	0.904	cellular_component	EVM0024420;EVM0022236;EVM0001202;EVM0003476;EVM0013327;EVM0017806
GO:0043069	negative regulation of programmed cell death	0.904	biological_process	EVM0003283;EVM0012067;EVM0019432;EVM0007729;EVM0015286;EVM0015281
GO:0006626	protein targeting to mitochondrion	0.906	biological_process	EVM0012067;EVM0010674;EVM0005725;EVM0007729
GO:0072655	establishment of protein localization to mitochondrion	0.906	biological_process	EVM0012067;EVM0010674;EVM0005725;EVM0007729
GO:0070585	protein localization to mitochondrion	0.906	biological_process	EVM0012067;EVM0010674;EVM0005725;EVM0007729
GO:0046916	cellular transition metal ion homeostasis	0.906	biological_process	EVM0000162;EVM0006860;EVM0015677;EVM0014049
GO:0051787	misfolded protein binding	0.912	molecular_function	EVM0003283;EVM0019432;EVM0015281
GO:1903322	positive regulation of protein modification by small protein conjugation or removal	0.912	biological_process	EVM0003283;EVM0019432;EVM0015281
GO:0042060	wound healing	0.912	biological_process	EVM0003283;EVM0019432;EVM0015281
GO:0007308	oocyte construction	0.912	biological_process	EVM0012067;EVM0008114;EVM0007729
GO:0007309	oocyte axis specification	0.912	biological_process	EVM0012067;EVM0008114;EVM0007729
GO:0008358	maternal determination of anterior/posterior axis, embryo	0.912	biological_process	EVM0012067;EVM0008114;EVM0007729
GO:0030496	midbody	0.912	cellular_component	EVM0003283;EVM0019432;EVM0015281
GO:0007423	sensory organ development	0.912	biological_process	EVM0012067;EVM0007729;EVM0015286
GO:0030665	clathrin-coated vesicle membrane	0.912	cellular_component	EVM0003852;EVM0000862;EVM0024534
GO:0031398	positive regulation of protein ubiquitination	0.912	biological_process	EVM0003283;EVM0019432;EVM0015281
GO:0007351	tripartite regional subdivision	0.912	biological_process	EVM0012067;EVM0008114;EVM0007729
GO:0008595	anterior/posterior axis specification, embryo	0.912	biological_process	EVM0012067;EVM0008114;EVM0007729
GO:0071216	cellular response to biotic stimulus	0.912	biological_process	EVM0003283;EVM0019432;EVM0015281
GO:0007314	oocyte anterior/posterior axis specification	0.912	biological_process	EVM0012067;EVM0008114;EVM0007729
GO:0042692	muscle cell differentiation	0.912	biological_process	EVM0012067;EVM0020662;EVM0007729
GO:0051240	positive regulation of multicellular organismal process	0.926	biological_process	EVM0003283;EVM0008309;EVM0012067;EVM0019432;EVM0005752;EVM0007729;EVM0015281
GO:0040009	regulation of growth rate	0.926	biological_process	EVM0006441;EVM0010431;EVM0003283;EVM0008114;EVM0002650;EVM0015281
GO:0044432	endoplasmic reticulum part	0.928	cellular_component	EVM0016559;EVM0006276;EVM0003283;EVM0022547;EVM0016210;EVM0019432;EVM0012449;EVM0006860;EVM0003037;EVM0016653;EVM0020266;EVM0001199;EVM0009144;EVM0012763;EVM0008567;EVM0011337;EVM0017015;EVM0006062;EVM0007950;EVM0015281
GO:0046915	transition metal ion transmembrane transporter activity	0.93	molecular_function	EVM0022534;EVM0019142;EVM0011390;EVM0015677;EVM0014049
GO:0005618	cell wall	0.932	cellular_component	EVM0016559;EVM0016555;EVM0016210;EVM0011369;EVM0012628;EVM0021565;EVM0010674;EVM0021498;EVM0009637;EVM0020551;EVM0017437;EVM0020028;EVM0014754;EVM0017795;EVM0001811;EVM0007944;EVM0002943;EVM0022240;EVM0004830;EVM0008247;EVM0016059;EVM0022549;EVM0011337;EVM0008597;EVM0018637;EVM0007047;EVM0011111;EVM0000299;EVM0011311;EVM0014821;EVM0002960;EVM0005161;EVM0016092
GO:0006793	phosphorus metabolic process	0.932	biological_process	EVM0010959;EVM0000162;EVM0006441;EVM0003283;EVM0001748;EVM0014316;EVM0008309;EVM0015490;EVM0012067;EVM0019432;EVM0020662;EVM0008114;EVM0016732;EVM0010674;EVM0006017;EVM0015439;EVM0006860;EVM0006905;EVM0011776;EVM0023231;EVM0011390;EVM0024306;EVM0019668;EVM0019286;EVM0021489;EVM0008404;EVM0005239;EVM0005879;EVM0008669;EVM0022208;EVM0014049;EVM0010017;EVM0006216;EVM0011386;EVM0018639;EVM0008185;EVM…
GO:0009267	cellular response to starvation	0.936	biological_process	EVM0003283;EVM0003460;EVM0019432;EVM0023231;EVM0000966;EVM0008247;EVM0023101;EVM0008669;EVM0015281
GO:0030312	external encapsulating structure	0.936	cellular_component	EVM0016559;EVM0016555;EVM0016210;EVM0011369;EVM0012628;EVM0021565;EVM0010674;EVM0021498;EVM0009637;EVM0020551;EVM0017437;EVM0020028;EVM0014754;EVM0017795;EVM0001811;EVM0007944;EVM0002943;EVM0022240;EVM0004830;EVM0008247;EVM0016059;EVM0022549;EVM0011337;EVM0008597;EVM0018637;EVM0007047;EVM0011111;EVM0000299;EVM0011311;EVM0014821;EVM0002960;EVM0005161;EVM0016092
GO:0060968	regulation of gene silencing	0.938	biological_process	EVM0017877;EVM0020274;EVM0015286;EVM0012359
GO:0008186	RNA-dependent ATPase activity	0.938	molecular_function	EVM0008114;EVM0011776;EVM0008185;EVM0019863
GO:1901799	negative regulation of proteasomal protein catabolic process	0.946	biological_process	EVM0012067;EVM0007729
GO:0032435	negative regulation of proteasomal ubiquitin-dependent protein catabolic process	0.946	biological_process	EVM0012067;EVM0007729
GO:1900182	positive regulation of protein localization to nucleus	0.946	biological_process	EVM0012067;EVM0007729
GO:0001754	eye photoreceptor cell differentiation	0.946	biological_process	EVM0012067;EVM0007729
GO:0001751	compound eye photoreceptor cell differentiation	0.946	biological_process	EVM0012067;EVM0007729
GO:0042800	histone methyltransferase activity (H3-K4 specific)	0.946	molecular_function	EVM0022138;EVM0007731
GO:0010528	regulation of transposition	0.946	biological_process	EVM0012067;EVM0007729
GO:0010529	negative regulation of transposition	0.946	biological_process	EVM0012067;EVM0007729
GO:0000245	spliceosomal complex assembly	0.946	biological_process	EVM0013354;EVM0008185
GO:0043619	regulation of transcription from RNA polymerase II promoter in response to oxidative stress	0.946	biological_process	EVM0001115;EVM0002705
GO:0051099	positive regulation of binding	0.946	biological_process	EVM0012067;EVM0007729
GO:0003012	muscle system process	0.946	biological_process	EVM0012067;EVM0007729
GO:0042307	positive regulation of protein import into nucleus	0.946	biological_process	EVM0012067;EVM0007729
GO:1903051	negative regulation of proteolysis involved in cellular protein catabolic process	0.946	biological_process	EVM0012067;EVM0007729
GO:0043393	regulation of protein binding	0.946	biological_process	EVM0012067;EVM0007729
GO:0060330	regulation of response to interferon-gamma	0.946	biological_process	EVM0012067;EVM0007729
GO:0060334	regulation of interferon-gamma-mediated signaling pathway	0.946	biological_process	EVM0012067;EVM0007729
GO:0001959	regulation of cytokine-mediated signaling pathway	0.946	biological_process	EVM0012067;EVM0007729
GO:1904591	positive regulation of protein import	0.946	biological_process	EVM0012067;EVM0007729
GO:0060759	regulation of response to cytokine stimulus	0.946	biological_process	EVM0012067;EVM0007729
GO:0019904	protein domain specific binding	0.946	molecular_function	EVM0012067;EVM0007729
GO:0030155	regulation of cell adhesion	0.946	biological_process	EVM0012067;EVM0007729
GO:0032768	regulation of monooxygenase activity	0.946	biological_process	EVM0012067;EVM0007729
GO:0046530	photoreceptor cell differentiation	0.946	biological_process	EVM0012067;EVM0007729
GO:0043627	response to estrogen	0.946	biological_process	EVM0012067;EVM0007729
GO:0030016	myofibril	0.946	cellular_component	EVM0012067;EVM0007729
GO:0030017	sarcomere	0.946	cellular_component	EVM0012067;EVM0007729
GO:0009938	negative regulation of gibberellic acid mediated signaling pathway	0.946	biological_process	EVM0023248;EVM0019929
GO:0031346	positive regulation of cell projection organization	0.946	biological_process	EVM0012067;EVM0007729
GO:0035872	nucleotide-binding domain, leucine rich repeat containing receptor signaling pathway	0.946	biological_process	EVM0012067;EVM0007729
GO:0080045	quercetin 3'-O-glucosyltransferase activity	0.946	molecular_function	EVM0015976;EVM0005765
GO:1903363	negative regulation of cellular protein catabolic process	0.946	biological_process	EVM0012067;EVM0007729
[truncated: 574 more rows]

## Sheet: ABA  48h
id	description	q-value	namespace	genes_in_study
[truncated: 980 more rows]

## Sheet: Low temperature  24h
id	description	q-value	namespace	genes_in_study
[truncated: 768 more rows]

[truncated: 1 more sheets: Low temperature  48h]
