# Supplementary material for: Retracted Article: Investigation of yellow horn (Xanthoceras sorbifoliaBunge) transcriptome in response to different abiotic stresses: a comparative RNA-Seq study
Source: Royal Society of Chemistry journal article supplement (doi:10.1039/c9ra09535g), 2020-01-01
Supplement: c9ra09535g3.xlsx [file c9ra09535g3.xlsx]

## Sheet: Salt  24h_
id	description	p_fdr	namespace	genes_in_study
GO:0009628	response to abiotic stimulus	0.008	biological_process	EVM0003043;EVM0008050;EVM0002087;EVM0022317;EVM0010139;EVM0010829;EVM0006853;EVM0001120;EVM0016858;EVM0021069;EVM0008414;EVM0003526;EVM0019723;EVM0006148;EVM0001258;EVM0023416;EVM0003450;EVM0015503;EVM0015096;EVM0001078;EVM0003671;EVM0010429;EVM0008849;EVM0022838;EVM0023117;EVM0021530;EVM0020757;EVM0020029;EVM0012773;EVM0018311;EVM0008295;EVM0002664;EVM0015155;EVM0019356;EVM0013826;EVM0005699;EVM…
GO:0016070	RNA metabolic process	0.022	biological_process	EVM0005040;EVM0003526;EVM0011085;EVM0017392;EVM0024137;EVM0014443;EVM0011451;EVM0024468;EVM0017049;EVM0019356;EVM0005699;EVM0009322;EVM0015936;EVM0013260;EVM0015369;EVM0016011;EVM0017117;EVM0011187;EVM0023180;EVM0023616;EVM0015510;EVM0023138;EVM0013836;EVM0000265
GO:0050502	cis-zeatin O-beta-D-glucosyltransferase activity	0.022	molecular_function	EVM0008050;EVM0022317;EVM0010139;EVM0002664;EVM0013826;EVM0013544
GO:0050403	trans-zeatin O-beta-D-glucosyltransferase activity	0.022	molecular_function	EVM0008050;EVM0022317;EVM0010139;EVM0002664;EVM0013826;EVM0013544
GO:0009414	response to water deprivation	0.022	biological_process	EVM0003043;EVM0010829;EVM0001120;EVM0016858;EVM0008414;EVM0010429;EVM0023117;EVM0020757;EVM0018311;EVM0008295;EVM0019356;EVM0003666;EVM0012387;EVM0013310;EVM0000296;EVM0005782;EVM0009843;EVM0004329;EVM0006281
GO:0009415	response to water	0.022	biological_process	EVM0003043;EVM0010829;EVM0001120;EVM0016858;EVM0008414;EVM0010429;EVM0023117;EVM0020757;EVM0018311;EVM0008295;EVM0019356;EVM0003666;EVM0012387;EVM0013310;EVM0000296;EVM0005782;EVM0009843;EVM0004329;EVM0006281
GO:0001101	response to acid chemical	0.046	biological_process	EVM0003043;EVM0019200;EVM0008228;EVM0010829;EVM0006853;EVM0023104;EVM0001120;EVM0016858;EVM0017531;EVM0005423;EVM0008414;EVM0003526;EVM0002603;EVM0001258;EVM0023416;EVM0003450;EVM0003671;EVM0010429;EVM0023117;EVM0021530;EVM0020757;EVM0020029;EVM0018311;EVM0008295;EVM0019356;EVM0022797;EVM0003666;EVM0000626;EVM0012387;EVM0013310;EVM0004016;EVM0000705;EVM0021860;EVM0000296;EVM0005782;EVM0018808;EVM…
GO:0009411	response to UV	0.06	biological_process	EVM0008050;EVM0022317;EVM0010139;EVM0008849;EVM0002664;EVM0015155;EVM0013826;EVM0013544;EVM0015304;EVM0022891;EVM0020810
GO:0009451	RNA modification	0.062	biological_process	EVM0011451;EVM0024468;EVM0017049;EVM0005699;EVM0013260;EVM0016011;EVM0023180;EVM0015510
GO:0080046	quercetin 4'-O-glucosyltransferase activity	0.076	molecular_function	EVM0008050;EVM0022317;EVM0010139;EVM0002664;EVM0013826;EVM0013544
GO:0010224	response to UV-B	0.08	biological_process	EVM0008050;EVM0022317;EVM0010139;EVM0008849;EVM0002664;EVM0013826;EVM0013544;EVM0015304;EVM0020810
GO:1901700	response to oxygen-containing compound	0.112	biological_process	EVM0003043;EVM0019200;EVM0008228;EVM0010829;EVM0006853;EVM0023104;EVM0001120;EVM0016858;EVM0017531;EVM0005423;EVM0008414;EVM0003526;EVM0006148;EVM0000806;EVM0002603;EVM0001258;EVM0023416;EVM0003450;EVM0006730;EVM0015392;EVM0003671;EVM0010429;EVM0023117;EVM0021530;EVM0020757;EVM0020029;EVM0018311;EVM0008295;EVM0004371;EVM0019356;EVM0022797;EVM0003666;EVM0000626;EVM0006619;EVM0012387;EVM0013310;EVM…
GO:0009788	negative regulation of abscisic acid-activated signaling pathway	0.116	biological_process	EVM0021069;EVM0008414;EVM0013817;EVM0008295;EVM0008398
GO:1905958	negative regulation of cellular response to alcohol	0.116	biological_process	EVM0021069;EVM0008414;EVM0013817;EVM0008295;EVM0008398
GO:1901420	negative regulation of response to alcohol	0.116	biological_process	EVM0021069;EVM0008414;EVM0013817;EVM0008295;EVM0008398
GO:0080044	quercetin 7-O-glucosyltransferase activity	0.126	molecular_function	EVM0008050;EVM0022317;EVM0010139;EVM0002533;EVM0002664;EVM0013826;EVM0013544
GO:0006396	RNA processing	0.178	biological_process	EVM0011085;EVM0017392;EVM0024137;EVM0014443;EVM0011451;EVM0019356;EVM0009322;EVM0016011;EVM0017117;EVM0011187;EVM0023616;EVM0015510;EVM0023138;EVM0013836;EVM0000265
GO:0080043	quercetin 3-O-glucosyltransferase activity	0.192	molecular_function	EVM0008050;EVM0022317;EVM0010139;EVM0002533;EVM0002664;EVM0013826;EVM0013544
GO:1905957	regulation of cellular response to alcohol	0.298	biological_process	EVM0021069;EVM0008414;EVM0013817;EVM0008295;EVM0014270;EVM0008398
GO:0009787	regulation of abscisic acid-activated signaling pathway	0.298	biological_process	EVM0021069;EVM0008414;EVM0013817;EVM0008295;EVM0014270;EVM0008398
GO:1901419	regulation of response to alcohol	0.314	biological_process	EVM0021069;EVM0008414;EVM0013817;EVM0008295;EVM0014270;EVM0008398
GO:0051554	flavonol metabolic process	0.314	biological_process	EVM0008050;EVM0022317;EVM0010139;EVM0002664;EVM0013826;EVM0013544
GO:0051555	flavonol biosynthetic process	0.314	biological_process	EVM0008050;EVM0022317;EVM0010139;EVM0002664;EVM0013826;EVM0013544
GO:0009719	response to endogenous stimulus	0.39	biological_process	EVM0003043;EVM0019200;EVM0010829;EVM0006853;EVM0023104;EVM0017531;EVM0008414;EVM0003526;EVM0006148;EVM0000806;EVM0002603;EVM0001258;EVM0023416;EVM0003450;EVM0006828;EVM0015392;EVM0003671;EVM0010429;EVM0024167;EVM0022838;EVM0023117;EVM0021530;EVM0020029;EVM0022128;EVM0018311;EVM0008295;EVM0004371;EVM0022797;EVM0000626;EVM0006619;EVM0012387;EVM0004016;EVM0020223;EVM0005019;EVM0022891;EVM0000705;EVM…
GO:0034470	ncRNA processing	0.394	biological_process	EVM0011085;EVM0017392;EVM0014443;EVM0011451;EVM0016011;EVM0015510;EVM0013836;EVM0000265
GO:0005732	small nucleolar ribonucleoprotein complex	0.406	cellular_component	EVM0017392;EVM0013836
GO:0008843	endochitinase activity	0.406	molecular_function	EVM0005659;EVM0004016
GO:0009737	response to abscisic acid	0.576	biological_process	EVM0003043;EVM0019200;EVM0010829;EVM0006853;EVM0008414;EVM0002603;EVM0001258;EVM0023416;EVM0003450;EVM0003671;EVM0010429;EVM0023117;EVM0008295;EVM0022797;EVM0012387;EVM0004016;EVM0000705;EVM0021860;EVM0009843;EVM0004329;EVM0016685;EVM0014170
GO:0051552	flavone metabolic process	0.59	biological_process	EVM0008050;EVM0022317;EVM0010139;EVM0002664;EVM0013826;EVM0013544
GO:0051553	flavone biosynthetic process	0.59	biological_process	EVM0008050;EVM0022317;EVM0010139;EVM0002664;EVM0013826;EVM0013544
GO:0035251	UDP-glucosyltransferase activity	0.592	molecular_function	EVM0008050;EVM0022317;EVM0010139;EVM0016858;EVM0003779;EVM0002533;EVM0002664;EVM0013826;EVM0013544
GO:0033993	response to lipid	0.594	biological_process	EVM0003043;EVM0019200;EVM0010829;EVM0006853;EVM0023104;EVM0008414;EVM0002603;EVM0001258;EVM0023416;EVM0003450;EVM0003671;EVM0010429;EVM0023117;EVM0021530;EVM0008295;EVM0004371;EVM0022797;EVM0000626;EVM0012387;EVM0004016;EVM0000705;EVM0021860;EVM0018808;EVM0009843;EVM0004329;EVM0016685;EVM0014170
GO:0034660	ncRNA metabolic process	0.656	biological_process	EVM0011085;EVM0017392;EVM0014443;EVM0011451;EVM0015936;EVM0016011;EVM0015510;EVM0013836;EVM0000265
GO:0046527	glucosyltransferase activity	0.738	molecular_function	EVM0008050;EVM0022317;EVM0010139;EVM0016858;EVM0003779;EVM0002533;EVM0002664;EVM0013826;EVM0013544
GO:0008380	RNA splicing	0.74	biological_process	EVM0011085;EVM0017392;EVM0019356;EVM0009322;EVM0017117;EVM0011187;EVM0023616
GO:0097305	response to alcohol	0.742	biological_process	EVM0003043;EVM0019200;EVM0010829;EVM0006853;EVM0008414;EVM0002603;EVM0001258;EVM0023416;EVM0003450;EVM0003671;EVM0010429;EVM0023117;EVM0021530;EVM0008295;EVM0004371;EVM0022797;EVM0012387;EVM0004016;EVM0000705;EVM0021860;EVM0009843;EVM0004329;EVM0016685;EVM0014170
GO:0090304	nucleic acid metabolic process	0.79	biological_process	EVM0005040;EVM0011705;EVM0003526;EVM0011085;EVM0017392;EVM0024137;EVM0014443;EVM0011451;EVM0024468;EVM0017049;EVM0015155;EVM0019356;EVM0005699;EVM0009322;EVM0015936;EVM0013260;EVM0015304;EVM0015369;EVM0016011;EVM0017117;EVM0011187;EVM0023180;EVM0023616;EVM0015510;EVM0023138;EVM0013836;EVM0000265
GO:0006561	proline biosynthetic process	0.792	biological_process	EVM0020998;EVM0004329
GO:0010033	response to organic substance	0.884	biological_process	EVM0003043;EVM0019200;EVM0010829;EVM0006853;EVM0023104;EVM0016858;EVM0017531;EVM0005423;EVM0008414;EVM0003526;EVM0006148;EVM0000806;EVM0002603;EVM0001258;EVM0023416;EVM0003450;EVM0006828;EVM0015392;EVM0003671;EVM0010429;EVM0024167;EVM0022838;EVM0023117;EVM0021530;EVM0020029;EVM0022128;EVM0018311;EVM0008295;EVM0004371;EVM0022797;EVM0000626;EVM0006619;EVM0012387;EVM0004016;EVM0020223;EVM0005019;EVM…
GO:0006807	nitrogen compound metabolic process	0.898	biological_process	EVM0015310;EVM0005040;EVM0008555;EVM0011705;EVM0017531;EVM0003526;EVM0011085;EVM0000806;EVM0017392;EVM0024137;EVM0021849;EVM0023416;EVM0014443;EVM0011451;EVM0015096;EVM0024468;EVM0003779;EVM0006011;EVM0017049;EVM0010210;EVM0008800;EVM0012773;EVM0015155;EVM0019356;EVM0005699;EVM0009322;EVM0015936;EVM0013260;EVM0013262;EVM0020998;EVM0004016;EVM0011542;EVM0015304;EVM0022891;EVM0015369;EVM0016011;EVM…
GO:0010467	gene expression	0.904	biological_process	EVM0005040;EVM0011085;EVM0017392;EVM0024137;EVM0014443;EVM0011451;EVM0006011;EVM0019356;EVM0009322;EVM0015369;EVM0016011;EVM0017117;EVM0011187;EVM0023616;EVM0015510;EVM0023138;EVM0013836;EVM0000265
GO:0009725	response to hormone	0.918	biological_process	EVM0003043;EVM0019200;EVM0010829;EVM0006853;EVM0023104;EVM0017531;EVM0008414;EVM0003526;EVM0000806;EVM0002603;EVM0001258;EVM0023416;EVM0003450;EVM0006828;EVM0003671;EVM0010429;EVM0024167;EVM0022838;EVM0023117;EVM0021530;EVM0022128;EVM0018311;EVM0008295;EVM0004371;EVM0022797;EVM0000626;EVM0012387;EVM0004016;EVM0005019;EVM0022891;EVM0000705;EVM0021860;EVM0018808;EVM0009843;EVM0004329;EVM0016685;EVM…
GO:0006970	response to osmotic stress	0.924	biological_process	EVM0010829;EVM0021069;EVM0019723;EVM0006148;EVM0001258;EVM0023416;EVM0003450;EVM0015096;EVM0003671;EVM0023117;EVM0018311;EVM0019356;EVM0000219;EVM0022797;EVM0003666;EVM0012387;EVM0020998;EVM0004016;EVM0005019;EVM0000296;EVM0004329;EVM0006134
GO:0003674	molecular_function	0.924	molecular_function	EVM0003043;EVM0016487;EVM0015310;EVM0021183;EVM0021741;EVM0019200;EVM0008050;EVM0006174;EVM0015555;EVM0002087;EVM0007078;EVM0008228;EVM0002563;EVM0013937;EVM0022317;EVM0022319;EVM0024588;EVM0010139;EVM0013983;EVM0005040;EVM0006853;EVM0007586;EVM0023104;EVM0002099;EVM0001120;EVM0008555;EVM0011705;EVM0016858;EVM0017531;EVM0008465;EVM0014031;EVM0008414;EVM0019723;EVM0011085;EVM0005850;EVM0006148;EVM…
GO:0000400	four-way junction DNA binding	0.924	molecular_function	EVM0015155;EVM0015304
GO:0032301	MutSalpha complex	0.924	cellular_component	EVM0015155;EVM0015304
GO:0090599	alpha-glucosidase activity	0.924	molecular_function	EVM0006730;EVM0013639
GO:0032138	single base insertion or deletion binding	0.924	molecular_function	EVM0015155;EVM0015304
GO:0032137	guanine/thymine mispair binding	0.924	molecular_function	EVM0015155;EVM0015304
GO:0004575	sucrose alpha-glucosidase activity	0.924	molecular_function	EVM0006730;EVM0013639
GO:0004558	alpha-1,4-glucosidase activity	0.924	molecular_function	EVM0006730;EVM0013639
GO:0010358	leaf shaping	0.924	biological_process	EVM0006460;EVM0022257
GO:0048657	anther wall tapetum cell differentiation	0.924	biological_process	EVM0008849;EVM0021316
GO:0048656	anther wall tapetum formation	0.924	biological_process	EVM0008849;EVM0021316
GO:0048655	anther wall tapetum morphogenesis	0.924	biological_process	EVM0008849;EVM0021316
GO:0048654	anther morphogenesis	0.924	biological_process	EVM0008849;EVM0021316
GO:0051983	regulation of chromosome segregation	0.974	biological_process	EVM0012271;EVM0015369;EVM0023138
GO:0045893	positive regulation of transcription, DNA-templated	0.986	biological_process	EVM0003043;EVM0002087;EVM0015503;EVM0006828;EVM0015392;EVM0020029;EVM0006619;EVM0012387;EVM0007680;EVM0014170
GO:1903508	positive regulation of nucleic acid-templated transcription	0.986	biological_process	EVM0003043;EVM0002087;EVM0015503;EVM0006828;EVM0015392;EVM0020029;EVM0006619;EVM0012387;EVM0007680;EVM0014170
GO:0045935	positive regulation of nucleobase-containing compound metabolic process	0.986	biological_process	EVM0003043;EVM0002087;EVM0015503;EVM0006828;EVM0015392;EVM0020029;EVM0006619;EVM0012387;EVM0007680;EVM0014634;EVM0014170
GO:0004568	chitinase activity	0.988	molecular_function	EVM0002563;EVM0005659;EVM0004016
GO:1901615	organic hydroxy compound metabolic process	0.992	biological_process	EVM0008050;EVM0022317;EVM0010139;EVM0003702;EVM0008849;EVM0021530;EVM0002664;EVM0013826;EVM0003666;EVM0013544;EVM0021860
GO:1901617	organic hydroxy compound biosynthetic process	0.992	biological_process	EVM0008050;EVM0022317;EVM0010139;EVM0003702;EVM0008849;EVM0002664;EVM0013826;EVM0003666;EVM0013544
GO:0009416	response to light stimulus	0.992	biological_process	EVM0008050;EVM0022317;EVM0010139;EVM0006853;EVM0003526;EVM0008849;EVM0022838;EVM0021530;EVM0018311;EVM0002664;EVM0015155;EVM0013826;EVM0005699;EVM0022797;EVM0000626;EVM0013544;EVM0015304;EVM0022891;EVM0004520;EVM0021860;EVM0020810
GO:0046483	heterocycle metabolic process	0.992	biological_process	EVM0015310;EVM0005040;EVM0008555;EVM0011705;EVM0017531;EVM0003526;EVM0011085;EVM0017392;EVM0024137;EVM0023416;EVM0014443;EVM0011451;EVM0015096;EVM0024468;EVM0017049;EVM0010210;EVM0008800;EVM0003702;EVM0015155;EVM0019356;EVM0005699;EVM0009322;EVM0015936;EVM0013260;EVM0020998;EVM0015304;EVM0022891;EVM0015369;EVM0016011;EVM0011944;EVM0001779;EVM0017117;EVM0011187;EVM0023180;EVM0004329;EVM0023616;EVM…
GO:0005634	nucleus	0.992	cellular_component	EVM0003043;EVM0021183;EVM0021741;EVM0019200;EVM0006174;EVM0004190;EVM0002087;EVM0007078;EVM0008228;EVM0013937;EVM0021412;EVM0005040;EVM0006853;EVM0023104;EVM0001120;EVM0008555;EVM0005423;EVM0021069;EVM0008414;EVM0011085;EVM0005850;EVM0006148;EVM0008304;EVM0000806;EVM0017392;EVM0021129;EVM0006460;EVM0005334;EVM0017925;EVM0006828;EVM0011451;EVM0016629;EVM0009688;EVM0015392;EVM0003178;EVM0022716;EVM…
GO:0009651	response to salt stress	0.992	biological_process	EVM0010829;EVM0021069;EVM0019723;EVM0006148;EVM0001258;EVM0023416;EVM0003450;EVM0015096;EVM0003671;EVM0023117;EVM0018311;EVM0019356;EVM0000219;EVM0022797;EVM0003666;EVM0012387;EVM0004016;EVM0005019;EVM0004329;EVM0006134
GO:0009084	glutamine family amino acid biosynthetic process	0.992	biological_process	EVM0020998;EVM0004329
GO:0008061	chitin binding	0.992	molecular_function	EVM0005659;EVM0020223
GO:0045292	mRNA cis splicing, via spliceosome	0.992	biological_process	EVM0017392;EVM0017117
GO:0042221	response to chemical	0.996	biological_process	EVM0003043;EVM0019200;EVM0008228;EVM0010829;EVM0006853;EVM0023104;EVM0001120;EVM0011705;EVM0016858;EVM0017531;EVM0005423;EVM0008414;EVM0003526;EVM0019723;EVM0006148;EVM0000806;EVM0002603;EVM0001258;EVM0023416;EVM0003450;EVM0006828;EVM0006730;EVM0015392;EVM0003671;EVM0010429;EVM0003178;EVM0024167;EVM0022833;EVM0022838;EVM0023117;EVM0021530;EVM0020757;EVM0020029;EVM0022128;EVM0018311;EVM0008295;EVM…
GO:1902680	positive regulation of RNA biosynthetic process	0.998	biological_process	EVM0003043;EVM0002087;EVM0015503;EVM0006828;EVM0015392;EVM0020029;EVM0006619;EVM0012387;EVM0007680;EVM0014170
GO:0051254	positive regulation of RNA metabolic process	0.998	biological_process	EVM0003043;EVM0002087;EVM0015503;EVM0006828;EVM0015392;EVM0020029;EVM0006619;EVM0012387;EVM0007680;EVM0014170
GO:0019219	regulation of nucleobase-containing compound metabolic process	0.998	biological_process	EVM0003043;EVM0021741;EVM0019200;EVM0006174;EVM0002087;EVM0005040;EVM0006853;EVM0023104;EVM0008555;EVM0005850;EVM0006148;EVM0008304;EVM0001258;EVM0015503;EVM0006828;EVM0015392;EVM0024167;EVM0020029;EVM0022128;EVM0018311;EVM0021138;EVM0015155;EVM0022797;EVM0010932;EVM0008398;EVM0000626;EVM0017355;EVM0006619;EVM0002977;EVM0012387;EVM0015304;EVM0008446;EVM0005716;EVM0014424;EVM0015369;EVM0007680;EVM…
GO:0044712	single-organism catabolic process	0.998	biological_process	EVM0001120;EVM0008555;EVM0017531;EVM0015096;EVM0006730;EVM0001078;EVM0008800;EVM0021530;EVM0020757;EVM0012773;EVM0014270;EVM0015155;EVM0013986;EVM0015636;EVM0015304;EVM0022891;EVM0021860;EVM0004329;EVM0014634;EVM0009379;EVM0022501;EVM0006281
GO:0071229	cellular response to acid chemical	0.998	biological_process	EVM0003043;EVM0019200;EVM0010829;EVM0001120;EVM0017531;EVM0003526;EVM0010429;EVM0023117;EVM0020757;EVM0020029;EVM0008295;EVM0000626;EVM0012387;EVM0006281
GO:0009968	negative regulation of signal transduction	0.998	biological_process	EVM0021069;EVM0008414;EVM0013817;EVM0021530;EVM0008295;EVM0008398
GO:0023057	negative regulation of signaling	0.998	biological_process	EVM0021069;EVM0008414;EVM0013817;EVM0021530;EVM0008295;EVM0008398
GO:0010648	negative regulation of cell communication	0.998	biological_process	EVM0021069;EVM0008414;EVM0013817;EVM0021530;EVM0008295;EVM0008398
GO:0003700	transcription factor activity, sequence-specific DNA binding	1	molecular_function	EVM0003043;EVM0021741;EVM0019200;EVM0006174;EVM0002087;EVM0005040;EVM0006853;EVM0023104;EVM0005850;EVM0006148;EVM0008304;EVM0001258;EVM0006828;EVM0015392;EVM0024167;EVM0022128;EVM0018311;EVM0021138;EVM0022797;EVM0010932;EVM0008398;EVM0000626;EVM0006619;EVM0002977;EVM0012387;EVM0008446;EVM0005716;EVM0014424;EVM0007680;EVM0020810;EVM0024062;EVM0022257;EVM0000733;EVM0016685;EVM0003882;EVM0014170;EVM…
GO:0001071	nucleic acid binding transcription factor activity	1	molecular_function	EVM0003043;EVM0021741;EVM0019200;EVM0006174;EVM0002087;EVM0005040;EVM0006853;EVM0023104;EVM0005850;EVM0006148;EVM0008304;EVM0001258;EVM0006828;EVM0015392;EVM0024167;EVM0022128;EVM0018311;EVM0021138;EVM0022797;EVM0010932;EVM0008398;EVM0000626;EVM0006619;EVM0002977;EVM0012387;EVM0008446;EVM0005716;EVM0014424;EVM0007680;EVM0020810;EVM0024062;EVM0022257;EVM0000733;EVM0016685;EVM0003882;EVM0014170;EVM…
GO:0048523	negative regulation of cellular process	1	biological_process	EVM0008555;EVM0021069;EVM0008414;EVM0015096;EVM0013817;EVM0021530;EVM0008295;EVM0004371;EVM0012271;EVM0015155;EVM0010932;EVM0008398;EVM0017355;EVM0015304;EVM0004520;EVM0022257;EVM0014634;EVM0016685;EVM0023138
GO:0048444	floral organ morphogenesis	1	biological_process	EVM0008555;EVM0006460;EVM0008849;EVM0021316
GO:0008891	glycolate oxidase activity	1	molecular_function	EVM0015636;EVM0014634
GO:0045910	negative regulation of DNA recombination	1	biological_process	EVM0015155;EVM0015304
GO:0010031	circumnutation	1	biological_process	EVM0005040;EVM0006853
GO:0032135	DNA insertion or deletion binding	1	molecular_function	EVM0015155;EVM0015304
GO:0000217	DNA secondary structure binding	1	molecular_function	EVM0015155;EVM0015304
GO:0006560	proline metabolic process	1	biological_process	EVM0020998;EVM0004329
GO:0003973	(S)-2-hydroxy-acid oxidase activity	1	molecular_function	EVM0015636;EVM0014634
GO:0048455	stamen formation	1	biological_process	EVM0008849;EVM0021316
GO:0043570	maintenance of DNA repeat elements	1	biological_process	EVM0015155;EVM0015304
GO:0016758	transferase activity, transferring hexosyl groups	1	molecular_function	EVM0008050;EVM0022317;EVM0010139;EVM0016858;EVM0003779;EVM0002533;EVM0002664;EVM0013826;EVM0013544;EVM0009967;EVM0005782
GO:0009314	response to radiation	1	biological_process	EVM0008050;EVM0022317;EVM0010139;EVM0006853;EVM0003526;EVM0008849;EVM0022838;EVM0021530;EVM0018311;EVM0002664;EVM0015155;EVM0013826;EVM0005699;EVM0022797;EVM0000626;EVM0013544;EVM0015304;EVM0022891;EVM0004520;EVM0021860;EVM0020810
GO:0009410	response to xenobiotic stimulus	1	biological_process	EVM0021530;EVM0006619;EVM0007680
GO:0009813	flavonoid biosynthetic process	1	biological_process	EVM0008050;EVM0022317;EVM0010139;EVM0002664;EVM0013826;EVM0013544
GO:0051173	positive regulation of nitrogen compound metabolic process	1	biological_process	EVM0003043;EVM0002087;EVM0015503;EVM0006828;EVM0015392;EVM0020029;EVM0006619;EVM0012387;EVM0007680;EVM0014634;EVM0014170
GO:0003333	amino acid transmembrane transport	1	biological_process	EVM0002099;EVM0020998;EVM0000171;EVM0002019
GO:0048563	post-embryonic animal organ morphogenesis	1	biological_process	EVM0008555;EVM0006460;EVM0008849;EVM0021316
GO:0015171	amino acid transmembrane transporter activity	1	molecular_function	EVM0002099;EVM0020998;EVM0000171;EVM0002019
GO:0009056	catabolic process	1	biological_process	EVM0001120;EVM0008555;EVM0017531;EVM0003526;EVM0017392;EVM0015096;EVM0006730;EVM0001078;EVM0008800;EVM0021530;EVM0020757;EVM0012773;EVM0014270;EVM0015155;EVM0013986;EVM0015936;EVM0015636;EVM0004016;EVM0015304;EVM0022891;EVM0021860;EVM0004329;EVM0014634;EVM0013157;EVM0009379;EVM0022501;EVM0006281
GO:0051171	regulation of nitrogen compound metabolic process	1	biological_process	EVM0003043;EVM0021741;EVM0019200;EVM0006174;EVM0002087;EVM0005040;EVM0006853;EVM0023104;EVM0008555;EVM0005850;EVM0006148;EVM0008304;EVM0001258;EVM0015503;EVM0006828;EVM0015392;EVM0024167;EVM0021530;EVM0020029;EVM0022128;EVM0018311;EVM0021138;EVM0015155;EVM0022797;EVM0010932;EVM0008398;EVM0000626;EVM0017355;EVM0006619;EVM0002977;EVM0012387;EVM0015304;EVM0008446;EVM0005716;EVM0014424;EVM0015369;EVM…
GO:0050896	response to stimulus	1	biological_process	EVM0003043;EVM0021741;EVM0019200;EVM0008050;EVM0002087;EVM0008228;EVM0022317;EVM0022319;EVM0010139;EVM0010829;EVM0006853;EVM0023104;EVM0002099;EVM0001120;EVM0011705;EVM0016858;EVM0017531;EVM0005423;EVM0021069;EVM0008414;EVM0003526;EVM0019723;EVM0006148;EVM0008304;EVM0000806;EVM0002603;EVM0001258;EVM0023416;EVM0003450;EVM0015503;EVM0006828;EVM0015096;EVM0006730;EVM0001078;EVM0015392;EVM0003779;EVM…
GO:0033044	regulation of chromosome organization	1	biological_process	EVM0006460;EVM0012271;EVM0015369;EVM0023138
GO:0006364	rRNA processing	1	biological_process	EVM0017392;EVM0014443;EVM0015510;EVM0013836;EVM0000265
GO:0008033	tRNA processing	1	biological_process	EVM0011085;EVM0011451;EVM0016011
GO:0006950	response to stress	1	biological_process	EVM0003043;EVM0021741;EVM0002087;EVM0008228;EVM0010829;EVM0006853;EVM0001120;EVM0016858;EVM0017531;EVM0021069;EVM0008414;EVM0003526;EVM0019723;EVM0006148;EVM0008304;EVM0000806;EVM0001258;EVM0023416;EVM0003450;EVM0015096;EVM0006730;EVM0001078;EVM0015392;EVM0003779;EVM0003671;EVM0010429;EVM0023117;EVM0021530;EVM0020757;EVM0020029;EVM0018311;EVM0008295;EVM0003461;EVM0014270;EVM0015155;EVM0019356;EVM…
GO:0048448	stamen morphogenesis	1	biological_process	EVM0008849;EVM0021316
GO:0031060	regulation of histone methylation	1	biological_process	EVM0006460;EVM0023138
GO:2001141	regulation of RNA biosynthetic process	1	biological_process	EVM0003043;EVM0021741;EVM0019200;EVM0006174;EVM0002087;EVM0005040;EVM0006853;EVM0023104;EVM0008555;EVM0005850;EVM0006148;EVM0008304;EVM0001258;EVM0015503;EVM0006828;EVM0015392;EVM0024167;EVM0020029;EVM0022128;EVM0018311;EVM0021138;EVM0022797;EVM0010932;EVM0008398;EVM0000626;EVM0017355;EVM0006619;EVM0002977;EVM0012387;EVM0008446;EVM0005716;EVM0014424;EVM0015369;EVM0007680;EVM0020810;EVM0024062;EVM…
GO:0010628	positive regulation of gene expression	1	biological_process	EVM0003043;EVM0002087;EVM0015503;EVM0006828;EVM0015392;EVM0020029;EVM0006619;EVM0012387;EVM0007680;EVM0014170
GO:0051252	regulation of RNA metabolic process	1	biological_process	EVM0003043;EVM0021741;EVM0019200;EVM0006174;EVM0002087;EVM0005040;EVM0006853;EVM0023104;EVM0008555;EVM0005850;EVM0006148;EVM0008304;EVM0001258;EVM0015503;EVM0006828;EVM0015392;EVM0024167;EVM0020029;EVM0022128;EVM0018311;EVM0021138;EVM0022797;EVM0010932;EVM0008398;EVM0000626;EVM0017355;EVM0006619;EVM0002977;EVM0012387;EVM0008446;EVM0005716;EVM0014424;EVM0015369;EVM0007680;EVM0020810;EVM0024062;EVM…
GO:1901575	organic substance catabolic process	1	biological_process	EVM0008555;EVM0017531;EVM0003526;EVM0017392;EVM0015096;EVM0006730;EVM0001078;EVM0008800;EVM0021530;EVM0012773;EVM0014270;EVM0015155;EVM0013986;EVM0015936;EVM0015636;EVM0004016;EVM0015304;EVM0022891;EVM0021860;EVM0004329;EVM0014634;EVM0013157;EVM0009379;EVM0022501
GO:0009812	flavonoid metabolic process	1	biological_process	EVM0008050;EVM0022317;EVM0010139;EVM0002664;EVM0013826;EVM0013544
GO:0010557	positive regulation of macromolecule biosynthetic process	1	biological_process	EVM0003043;EVM0002087;EVM0015503;EVM0006828;EVM0015392;EVM0020029;EVM0006619;EVM0012387;EVM0007680;EVM0014170
GO:0008194	UDP-glycosyltransferase activity	1	molecular_function	EVM0008050;EVM0022317;EVM0010139;EVM0016858;EVM0003779;EVM0002533;EVM0002664;EVM0013826;EVM0013544
GO:1901360	organic cyclic compound metabolic process	1	biological_process	EVM0015310;EVM0005040;EVM0008555;EVM0011705;EVM0017531;EVM0003526;EVM0011085;EVM0017392;EVM0024137;EVM0023416;EVM0014443;EVM0011451;EVM0015096;EVM0024468;EVM0017049;EVM0010210;EVM0008800;EVM0003702;EVM0008849;EVM0015155;EVM0019356;EVM0005699;EVM0009322;EVM0015936;EVM0013260;EVM0020998;EVM0015304;EVM0022891;EVM0015369;EVM0016011;EVM0011944;EVM0001779;EVM0017117;EVM0011187;EVM0023180;EVM0004329;EVM…
GO:0016072	rRNA metabolic process	1	biological_process	EVM0017392;EVM0014443;EVM0015510;EVM0013836;EVM0000265
GO:0006355	regulation of transcription, DNA-templated	1	biological_process	EVM0003043;EVM0021741;EVM0019200;EVM0006174;EVM0002087;EVM0005040;EVM0006853;EVM0023104;EVM0008555;EVM0005850;EVM0006148;EVM0008304;EVM0001258;EVM0015503;EVM0006828;EVM0015392;EVM0024167;EVM0020029;EVM0022128;EVM0018311;EVM0021138;EVM0022797;EVM0010932;EVM0008398;EVM0000626;EVM0017355;EVM0006619;EVM0002977;EVM0012387;EVM0008446;EVM0005716;EVM0014424;EVM0007680;EVM0020810;EVM0024062;EVM0022257;EVM…
GO:1903506	regulation of nucleic acid-templated transcription	1	biological_process	EVM0003043;EVM0021741;EVM0019200;EVM0006174;EVM0002087;EVM0005040;EVM0006853;EVM0023104;EVM0008555;EVM0005850;EVM0006148;EVM0008304;EVM0001258;EVM0015503;EVM0006828;EVM0015392;EVM0024167;EVM0020029;EVM0022128;EVM0018311;EVM0021138;EVM0022797;EVM0010932;EVM0008398;EVM0000626;EVM0017355;EVM0006619;EVM0002977;EVM0012387;EVM0008446;EVM0005716;EVM0014424;EVM0007680;EVM0020810;EVM0024062;EVM0022257;EVM…
GO:0016623	oxidoreductase activity, acting on the aldehyde or oxo group of donors, oxygen as acceptor	1	molecular_function	EVM0021849;EVM0021530
GO:0050879	multicellular organismal movement	1	biological_process	EVM0005040;EVM0006853
GO:0031056	regulation of histone modification	1	biological_process	EVM0006460;EVM0023138
GO:0003684	damaged DNA binding	1	molecular_function	EVM0015155;EVM0015304
GO:0004031	aldehyde oxidase activity	1	molecular_function	EVM0021849;EVM0021530
GO:0071704	organic substance metabolic process	1	biological_process	EVM0015310;EVM0008050;EVM0007078;EVM0022317;EVM0022319;EVM0024588;EVM0010139;EVM0005040;EVM0008555;EVM0011705;EVM0016858;EVM0017531;EVM0008465;EVM0014031;EVM0003526;EVM0011085;EVM0000806;EVM0017392;EVM0024137;EVM0021849;EVM0023416;EVM0014443;EVM0011451;EVM0015096;EVM0006730;EVM0001078;EVM0024468;EVM0003779;EVM0006011;EVM0017049;EVM0010210;EVM0008800;EVM0003702;EVM0008849;EVM0013817;EVM0021530;EVM…
GO:0048449	floral organ formation	1	biological_process	EVM0006460;EVM0008849;EVM0021316
GO:0051783	regulation of nuclear division	1	biological_process	EVM0017392;EVM0012271;EVM0015304;EVM0015369
GO:0010029	regulation of seed germination	1	biological_process	EVM0024588;EVM0010829;EVM0013639;EVM0016685
GO:0008514	organic anion transmembrane transporter activity	1	molecular_function	EVM0002099;EVM0008800;EVM0020998;EVM0000171;EVM0002019;EVM0000309
GO:0042254	ribosome biogenesis	1	biological_process	EVM0008555;EVM0017392;EVM0014443;EVM0015510;EVM0013836;EVM0000265
GO:0031323	regulation of cellular metabolic process	1	biological_process	EVM0003043;EVM0021741;EVM0019200;EVM0006174;EVM0002087;EVM0005040;EVM0006853;EVM0023104;EVM0008555;EVM0005850;EVM0006148;EVM0008304;EVM0001258;EVM0006460;EVM0015503;EVM0006828;EVM0015392;EVM0024167;EVM0021530;EVM0020029;EVM0022128;EVM0018311;EVM0004371;EVM0021138;EVM0015155;EVM0022797;EVM0010932;EVM0008398;EVM0000626;EVM0017355;EVM0006619;EVM0002977;EVM0012387;EVM0015304;EVM0008446;EVM0005716;EVM…
GO:0060255	regulation of macromolecule metabolic process	1	biological_process	EVM0003043;EVM0021741;EVM0019200;EVM0006174;EVM0002087;EVM0005040;EVM0006853;EVM0023104;EVM0008555;EVM0003526;EVM0005850;EVM0006148;EVM0008304;EVM0017392;EVM0001258;EVM0006460;EVM0015503;EVM0006828;EVM0015392;EVM0024167;EVM0021530;EVM0020029;EVM0022128;EVM0018311;EVM0021138;EVM0015155;EVM0022797;EVM0010932;EVM0008398;EVM0000626;EVM0017355;EVM0006619;EVM0002977;EVM0012387;EVM0015304;EVM0008446;EVM…
GO:1900140	regulation of seedling development	1	biological_process	EVM0024588;EVM0010829;EVM0013639;EVM0016685
GO:0048519	negative regulation of biological process	1	biological_process	EVM0005040;EVM0008555;EVM0021069;EVM0008414;EVM0003526;EVM0017392;EVM0015096;EVM0013817;EVM0021530;EVM0020029;EVM0008295;EVM0004371;EVM0012271;EVM0015155;EVM0010932;EVM0008398;EVM0017355;EVM0015304;EVM0004520;EVM0022257;EVM0014634;EVM0016685;EVM0023138
GO:1901701	cellular response to oxygen-containing compound	1	biological_process	EVM0003043;EVM0019200;EVM0010829;EVM0001120;EVM0017531;EVM0003526;EVM0000806;EVM0010429;EVM0023117;EVM0020757;EVM0020029;EVM0008295;EVM0000626;EVM0012387;EVM0020223;EVM0021860;EVM0006281
GO:0050660	flavin adenine dinucleotide binding	1	molecular_function	EVM0021849;EVM0015636
GO:0000018	regulation of DNA recombination	1	biological_process	EVM0015155;EVM0015304
GO:0046185	aldehyde catabolic process	1	biological_process	EVM0021530;EVM0015636
GO:0015801	aromatic amino acid transport	1	biological_process	EVM0002099;EVM0002019
GO:0000710	meiotic mismatch repair	1	biological_process	EVM0015155;EVM0015304
GO:1903825	organic acid transmembrane transport	1	biological_process	EVM0002099;EVM0020998;EVM0000171;EVM0002019
GO:1905039	carboxylic acid transmembrane transport	1	biological_process	EVM0002099;EVM0020998;EVM0000171;EVM0002019
GO:1901363	heterocyclic compound binding	1	molecular_function	EVM0019200;EVM0015555;EVM0002087;EVM0008228;EVM0013983;EVM0005040;EVM0008555;EVM0019723;EVM0017392;EVM0021849;EVM0023416;EVM0006828;EVM0015392;EVM0006011;EVM0021530;EVM0022128;EVM0018311;EVM0015155;EVM0019356;EVM0000626;EVM0015636;EVM0017355;EVM0013310;EVM0015304;EVM0005716;EVM0015510
GO:0006865	amino acid transport	1	biological_process	EVM0002099;EVM0020998;EVM0000171;EVM0002019
GO:0097159	organic cyclic compound binding	1	molecular_function	EVM0019200;EVM0015555;EVM0002087;EVM0008228;EVM0013983;EVM0005040;EVM0008555;EVM0019723;EVM0017392;EVM0021849;EVM0023416;EVM0006828;EVM0015392;EVM0006011;EVM0021530;EVM0022128;EVM0018311;EVM0015155;EVM0019356;EVM0000626;EVM0015636;EVM0017355;EVM0013310;EVM0015304;EVM0005716;EVM0015510
GO:0000375	RNA splicing, via transesterification reactions	1	biological_process	EVM0017392;EVM0019356;EVM0009322;EVM0017117
GO:0000377	RNA splicing, via transesterification reactions with bulged adenosine as nucleophile	1	biological_process	EVM0017392;EVM0019356;EVM0009322;EVM0017117
GO:0015217	ADP transmembrane transporter activity	1	molecular_function	EVM0008800;EVM0000309
GO:0009313	oligosaccharide catabolic process	1	biological_process	EVM0006730;EVM0013986
GO:0061025	membrane fusion	1	biological_process	EVM0009261;EVM0009261
GO:0033043	regulation of organelle organization	1	biological_process	EVM0017392;EVM0006460;EVM0012271;EVM0015304;EVM0015369;EVM0023138
GO:0004553	hydrolase activity, hydrolyzing O-glycosyl compounds	1	molecular_function	EVM0002563;EVM0006730;EVM0001078;EVM0013639;EVM0013986;EVM0005659;EVM0004016
GO:0034641	cellular nitrogen compound metabolic process	1	biological_process	EVM0015310;EVM0005040;EVM0008555;EVM0011705;EVM0017531;EVM0003526;EVM0011085;EVM0017392;EVM0024137;EVM0014443;EVM0011451;EVM0015096;EVM0024468;EVM0006011;EVM0017049;EVM0010210;EVM0008800;EVM0015155;EVM0019356;EVM0005699;EVM0009322;EVM0015936;EVM0013260;EVM0015304;EVM0022891;EVM0015369;EVM0016011;EVM0011944;EVM0001779;EVM0017117;EVM0011187;EVM0023180;EVM0013157;EVM0023616;EVM0015510;EVM0023138;EVM…
GO:0006593	ornithine catabolic process	1	biological_process	EVM0004329
GO:0043928	exonucleolytic nuclear-transcribed mRNA catabolic process involved in deadenylation-dependent decay	1	biological_process	EVM0017392
GO:0080180	2-methylguanosine metabolic process	1	biological_process	EVM0016011
GO:0035389	establishment of chromatin silencing at silent mating-type cassette	1	biological_process	EVM0023138
GO:0006343	establishment of chromatin silencing	1	biological_process	EVM0023138
GO:0002312	B cell activation involved in immune response	1	biological_process	EVM0015304
GO:0000403	Y-form DNA binding	1	molecular_function	EVM0015304
GO:0000406	double-strand/single-strand DNA junction binding	1	molecular_function	EVM0015304
GO:0034484	raffinose catabolic process	1	biological_process	EVM0013986
GO:0070178	D-serine metabolic process	1	biological_process	EVM0013262
GO:0002208	somatic diversification of immunoglobulins involved in immune response	1	biological_process	EVM0015304
GO:0002377	immunoglobulin production	1	biological_process	EVM0015304
GO:0070547	L-tyrosine aminotransferase activity	1	molecular_function	EVM0003702
GO:0090052	regulation of chromatin silencing at centromere	1	biological_process	EVM0023138
GO:0010520	regulation of reciprocal meiotic recombination	1	biological_process	EVM0015304
GO:0046030	inositol trisphosphate phosphatase activity	1	molecular_function	EVM0021860
GO:0004587	ornithine-oxo-acid transaminase activity	1	molecular_function	EVM0004329
GO:0032302	MutSbeta complex	1	cellular_component	EVM0015304
GO:0046540	U4/U6 x U5 tri-snRNP complex	1	cellular_component	EVM0017392
GO:0010309	acireductone dioxygenase [iron(II)-requiring] activity	1	molecular_function	EVM0021183
GO:0000991	transcription factor activity, core RNA polymerase II binding	1	molecular_function	EVM0015369
GO:0030515	snoRNA binding	1	molecular_function	EVM0015510
GO:0035822	gene conversion	1	biological_process	EVM0015304
GO:0072332	intrinsic apoptotic signaling pathway by p53 class mediator	1	biological_process	EVM0015304
GO:0004064	arylesterase activity	1	molecular_function	EVM0013983
GO:0046487	glyoxylate metabolic process	1	biological_process	EVM0014031
GO:0006030	chitin metabolic process	1	biological_process	EVM0004016
GO:0006032	chitin catabolic process	1	biological_process	EVM0004016
GO:0046523	S-methyl-5-thioribose-1-phosphate isomerase activity	1	molecular_function	EVM0000806
GO:0008193	tRNA guanylyltransferase activity	1	molecular_function	EVM0011451
GO:0045128	negative regulation of reciprocal meiotic recombination	1	biological_process	EVM0015304
GO:0048447	sepal morphogenesis	1	biological_process	EVM0006460
GO:0002200	somatic diversification of immune receptors	1	biological_process	EVM0015304
GO:0035885	exochitinase activity	1	molecular_function	EVM0004016
GO:0000930	gamma-tubulin complex	1	cellular_component	EVM0024299
GO:0044450	microtubule organizing center part	1	cellular_component	EVM0024299
GO:0006097	glyoxylate cycle	1	biological_process	EVM0014031
GO:0002460	adaptive immune response based on somatic recombination of immune receptors built from immunoglobulin superfamily domains	1	biological_process	EVM0015304
GO:0002285	lymphocyte activation involved in immune response	1	biological_process	EVM0015304
GO:0002449	lymphocyte mediated immunity	1	biological_process	EVM0015304
GO:0002440	production of molecular mediator of immune response	1	biological_process	EVM0015304
GO:0033530	raffinose metabolic process	1	biological_process	EVM0013986
GO:0006968	cellular defense response	1	biological_process	EVM0017531
GO:0008721	D-serine ammonia-lyase activity	1	molecular_function	EVM0013262
GO:0010111	glyoxysome organization	1	biological_process	EVM0014270
GO:0005688	U6 snRNP	1	cellular_component	EVM0017392
GO:0003941	L-serine ammonia-lyase activity	1	molecular_function	EVM0013262
GO:0031573	intra-S DNA damage checkpoint	1	biological_process	EVM0015304
GO:0006311	meiotic gene conversion	1	biological_process	EVM0015304
GO:0005669	transcription factor TFIID complex	1	cellular_component	EVM0015369
GO:0002562	somatic diversification of immune receptors via germline recombination within a single locus	1	biological_process	EVM0015304
GO:0002566	somatic diversification of immune receptors via somatic mutation	1	biological_process	EVM0015304
GO:0030378	serine racemase activity	1	molecular_function	EVM0013262
GO:0016064	immunoglobulin mediated immune response	1	biological_process	EVM0015304
GO:0002381	immunoglobulin production involved in immunoglobulin mediated immune response	1	biological_process	EVM0015304
GO:0000024	maltose biosynthetic process	1	biological_process	EVM0001078
GO:0008630	intrinsic apoptotic signaling pathway in response to DNA damage	1	biological_process	EVM0015304
GO:0006026	aminoglycan catabolic process	1	biological_process	EVM0004016
GO:0052658	inositol-1,4,5-trisphosphate 5-phosphatase activity	1	molecular_function	EVM0021860
GO:0019724	B cell mediated immunity	1	biological_process	EVM0015304
GO:0097526	spliceosomal tri-snRNP complex	1	cellular_component	EVM0017392
GO:0060631	regulation of meiosis I	1	biological_process	EVM0015304
GO:0048453	sepal formation	1	biological_process	EVM0006460
GO:0008710	8-amino-7-oxononanoate synthase activity	1	molecular_function	EVM0015310
GO:0010478	chlororespiration	1	biological_process	EVM0022503
GO:0042771	intrinsic apoptotic signaling pathway in response to DNA damage by p53 class mediator	1	biological_process	EVM0015304
GO:0002204	somatic recombination of immunoglobulin genes involved in immune response	1	biological_process	EVM0015304
GO:0016445	somatic diversification of immunoglobulins	1	biological_process	EVM0015304
GO:0016447	somatic recombination of immunoglobulin gene segments	1	biological_process	EVM0015304
GO:0016446	somatic hypermutation of immunoglobulin genes	1	biological_process	EVM0015304
GO:0010234	anther wall tapetum cell fate specification	1	biological_process	EVM0021316
GO:0002250	adaptive immune response	1	biological_process	EVM0015304
GO:0052692	raffinose alpha-galactosidase activity	1	molecular_function	EVM0013986
GO:0045190	isotype switching	1	biological_process	EVM0015304
GO:0004838	L-tyrosine:2-oxoglutarate aminotransferase activity	1	molecular_function	EVM0003702
GO:0009738	abscisic acid-activated signaling pathway	1	biological_process	EVM0019200;EVM0010829;EVM0023117;EVM0008295;EVM0012387
GO:0051445	regulation of meiotic cell cycle	1	biological_process	EVM0017392;EVM0006828;EVM0015304
GO:0008150	biological_process	1	biological_process	EVM0003043;EVM0016487;EVM0015310;EVM0021183;EVM0021741;EVM0019200;EVM0008050;EVM0006174;EVM0009976;EVM0002087;EVM0007078;EVM0008228;EVM0002563;EVM0013937;EVM0022317;EVM0022319;EVM0024588;EVM0010139;EVM0013983;EVM0010829;EVM0005040;EVM0006853;EVM0007586;EVM0023104;EVM0014088;EVM0002099;EVM0001120;EVM0008555;EVM0011705;EVM0016858;EVM0017531;EVM0005423;EVM0008465;EVM0021069;EVM0014031;EVM0008414;EVM…
GO:0022613	ribonucleoprotein complex biogenesis	1	biological_process	EVM0008555;EVM0017392;EVM0014443;EVM0015510;EVM0013836;EVM0000265
GO:0080090	regulation of primary metabolic process	1	biological_process	EVM0003043;EVM0021741;EVM0019200;EVM0006174;EVM0002087;EVM0005040;EVM0006853;EVM0023104;EVM0008555;EVM0005850;EVM0006148;EVM0008304;EVM0001258;EVM0006460;EVM0015503;EVM0006828;EVM0015392;EVM0024167;EVM0021530;EVM0020029;EVM0022128;EVM0018311;EVM0021138;EVM0015155;EVM0022797;EVM0010932;EVM0008398;EVM0000626;EVM0017355;EVM0006619;EVM0002977;EVM0012387;EVM0015304;EVM0008446;EVM0005716;EVM0014424;EVM…
GO:0031328	positive regulation of cellular biosynthetic process	1	biological_process	EVM0003043;EVM0002087;EVM0015503;EVM0006828;EVM0015392;EVM0020029;EVM0006619;EVM0012387;EVM0007680;EVM0014170
GO:0010604	positive regulation of macromolecule metabolic process	1	biological_process	EVM0003043;EVM0002087;EVM0015503;EVM0006828;EVM0015392;EVM0020029;EVM0006619;EVM0012387;EVM0007680;EVM0014634;EVM0014170
GO:0004364	glutathione transferase activity	1	molecular_function	EVM0001120;EVM0020757;EVM0006281
GO:0006139	nucleobase-containing compound metabolic process	1	biological_process	EVM0005040;EVM0008555;EVM0011705;EVM0017531;EVM0003526;EVM0011085;EVM0017392;EVM0024137;EVM0014443;EVM0011451;EVM0015096;EVM0024468;EVM0017049;EVM0015155;EVM0019356;EVM0005699;EVM0009322;EVM0015936;EVM0013260;EVM0015304;EVM0022891;EVM0015369;EVM0016011;EVM0011944;EVM0017117;EVM0011187;EVM0023180;EVM0023616;EVM0015510;EVM0023138;EVM0013836;EVM0000265;EVM0022501
GO:0005985	sucrose metabolic process	1	biological_process	EVM0016858;EVM0006730
GO:1901642	nucleoside transmembrane transport	1	biological_process	EVM0006463;EVM0008800
GO:0015860	purine nucleoside transmembrane transport	1	biological_process	EVM0006463;EVM0008800
GO:0006400	tRNA modification	1	biological_process	EVM0011451;EVM0016011
GO:0015211	purine nucleoside transmembrane transporter activity	1	molecular_function	EVM0006463;EVM0008800
GO:0000373	Group II intron splicing	1	biological_process	EVM0019356;EVM0017117
GO:0009891	positive regulation of biosynthetic process	1	biological_process	EVM0003043;EVM0002087;EVM0015503;EVM0006828;EVM0015392;EVM0020029;EVM0006619;EVM0012387;EVM0007680;EVM0014170
GO:0044282	small molecule catabolic process	1	biological_process	EVM0008800;EVM0021530;EVM0012773;EVM0014270;EVM0015636;EVM0021860;EVM0004329
GO:0044248	cellular catabolic process	1	biological_process	EVM0001120;EVM0008555;EVM0017531;EVM0003526;EVM0017392;EVM0015096;EVM0006730;EVM0001078;EVM0008800;EVM0021530;EVM0020757;EVM0012773;EVM0014270;EVM0015155;EVM0015936;EVM0015636;EVM0015304;EVM0022891;EVM0004329;EVM0014634;EVM0009379;EVM0022501;EVM0006281
GO:0010556	regulation of macromolecule biosynthetic process	1	biological_process	EVM0003043;EVM0021741;EVM0019200;EVM0006174;EVM0002087;EVM0005040;EVM0006853;EVM0023104;EVM0008555;EVM0005850;EVM0006148;EVM0008304;EVM0001258;EVM0015503;EVM0006828;EVM0015392;EVM0024167;EVM0020029;EVM0022128;EVM0018311;EVM0021138;EVM0022797;EVM0010932;EVM0008398;EVM0000626;EVM0017355;EVM0006619;EVM0002977;EVM0012387;EVM0008446;EVM0005716;EVM0014424;EVM0015369;EVM0007680;EVM0020810;EVM0024062;EVM…
GO:0048507	meristem development	1	biological_process	EVM0008555;EVM0006460;EVM0022128;EVM0017355;EVM0001779;EVM0022257;EVM0000733
GO:0042440	pigment metabolic process	1	biological_process	EVM0008050;EVM0022317;EVM0010139;EVM0002664;EVM0013826;EVM0013544;EVM0009379
GO:0050794	regulation of cellular process	1	biological_process	EVM0003043;EVM0021741;EVM0019200;EVM0006174;EVM0002087;EVM0010829;EVM0005040;EVM0006853;EVM0023104;EVM0008555;EVM0021069;EVM0008414;EVM0003526;EVM0005850;EVM0006148;EVM0008304;EVM0017392;EVM0001258;EVM0006460;EVM0015503;EVM0006828;EVM0015096;EVM0015392;EVM0024167;EVM0013817;EVM0023117;EVM0021530;EVM0020029;EVM0022128;EVM0018311;EVM0008295;EVM0004371;EVM0012271;EVM0021138;EVM0014270;EVM0015155;EVM…
GO:0016757	transferase activity, transferring glycosyl groups	1	molecular_function	EVM0008050;EVM0022317;EVM0010139;EVM0016858;EVM0003779;EVM0002533;EVM0002664;EVM0013826;EVM0013544;EVM0009967;EVM0005782
GO:0003676	nucleic acid binding	1	molecular_function	EVM0019200;EVM0002087;EVM0008228;EVM0013983;EVM0005040;EVM0017392;EVM0006828;EVM0015392;EVM0006011;EVM0022128;EVM0018311;EVM0015155;EVM0019356;EVM0000626;EVM0017355;EVM0013310;EVM0015304;EVM0005716;EVM0015510
GO:0048585	negative regulation of response to stimulus	1	biological_process	EVM0021069;EVM0008414;EVM0013817;EVM0021530;EVM0020029;EVM0008295;EVM0008398
GO:0005488	binding	1	molecular_function	EVM0019200;EVM0015555;EVM0002087;EVM0008228;EVM0013983;EVM0005040;EVM0001120;EVM0008555;EVM0019723;EVM0017392;EVM0021849;EVM0023416;EVM0009261;EVM0006460;EVM0006828;EVM0015096;EVM0015392;EVM0006011;EVM0021530;EVM0020757;EVM0022128;EVM0018311;EVM0012610;EVM0015155;EVM0019356;EVM0020712;EVM0024299;EVM0000626;EVM0015636;EVM0017355;EVM0013262;EVM0013310;EVM0005659;EVM0020223;EVM0015304;EVM0005716;EVM…
GO:0005984	disaccharide metabolic process	1	biological_process	EVM0016858;EVM0006730;EVM0001078
GO:0009064	glutamine family amino acid metabolic process	1	biological_process	EVM0020998;EVM0011542;EVM0004329
GO:0016899	oxidoreductase activity, acting on the CH-OH group of donors, oxygen as acceptor	1	molecular_function	EVM0015636;EVM0014634
GO:0030983	mismatched DNA binding	1	molecular_function	EVM0015155;EVM0015304
GO:1905818	regulation of chromosome separation	1	biological_process	EVM0012271;EVM0015369
GO:0033045	regulation of sister chromatid segregation	1	biological_process	EVM0012271;EVM0015369
GO:0033047	regulation of mitotic sister chromatid segregation	1	biological_process	EVM0012271;EVM0015369
GO:0005347	ATP transmembrane transporter activity	1	molecular_function	EVM0008800;EVM0000309
GO:0030071	regulation of mitotic metaphase/anaphase transition	1	biological_process	EVM0012271;EVM0015369
GO:0015175	neutral amino acid transmembrane transporter activity	1	molecular_function	EVM0002099;EVM0002019
GO:0048658	anther wall tapetum development	1	biological_process	EVM0008849;EVM0021316
GO:0010965	regulation of mitotic sister chromatid separation	1	biological_process	EVM0012271;EVM0015369
GO:1902099	regulation of metaphase/anaphase transition of cell cycle	1	biological_process	EVM0012271;EVM0015369
GO:0045934	negative regulation of nucleobase-containing compound metabolic process	1	biological_process	EVM0008555;EVM0015155;EVM0010932;EVM0017355;EVM0015304;EVM0022257;EVM0016685;EVM0023138
GO:0005739	mitochondrion	1	cellular_component	EVM0012525;EVM0004190;EVM0020949;EVM0011926;EVM0006850;EVM0003948;EVM0019723;EVM0022764;EVM0000655;EVM0006789;EVM0006730;EVM0017043;EVM0006421;EVM0013639;EVM0021530;EVM0010354;EVM0007290;EVM0011074;EVM0021879;EVM0023624;EVM0005937;EVM0014270;EVM0019356;EVM0004309;EVM0021480;EVM0015636;EVM0020998;EVM0014044;EVM0020669;EVM0003507;EVM0017541;EVM0011944;EVM0013797;EVM0002084;EVM0023180;EVM0004329;EVM…
GO:0010200	response to chitin	1	biological_process	EVM0006148;EVM0015392;EVM0020029;EVM0006619;EVM0020223;EVM0007680
GO:0009893	positive regulation of metabolic process	1	biological_process	EVM0003043;EVM0002087;EVM0015503;EVM0006828;EVM0015392;EVM0020029;EVM0000626;EVM0006619;EVM0012387;EVM0007680;EVM0014634;EVM0014170
GO:0010035	response to inorganic substance	1	biological_process	EVM0003043;EVM0008228;EVM0010829;EVM0001120;EVM0011705;EVM0016858;EVM0008414;EVM0019723;EVM0000806;EVM0006730;EVM0010429;EVM0003178;EVM0023117;EVM0020757;EVM0018311;EVM0008295;EVM0005937;EVM0019356;EVM0022797;EVM0003666;EVM0012387;EVM0013310;EVM0000296;EVM0005782;EVM0009843;EVM0004329;EVM0006281
GO:0043295	glutathione binding	1	molecular_function	EVM0001120;EVM0020757;EVM0006281
GO:0072341	modified amino acid binding	1	molecular_function	EVM0001120;EVM0020757;EVM0006281
GO:1900750	oligopeptide binding	1	molecular_function	EVM0001120;EVM0020757;EVM0006281
GO:2000112	regulation of cellular macromolecule biosynthetic process	1	biological_process	EVM0003043;EVM0021741;EVM0019200;EVM0006174;EVM0002087;EVM0005040;EVM0006853;EVM0023104;EVM0008555;EVM0005850;EVM0006148;EVM0008304;EVM0001258;EVM0015503;EVM0006828;EVM0015392;EVM0024167;EVM0020029;EVM0022128;EVM0018311;EVM0021138;EVM0022797;EVM0010932;EVM0008398;EVM0000626;EVM0017355;EVM0006619;EVM0002977;EVM0012387;EVM0008446;EVM0005716;EVM0014424;EVM0007680;EVM0020810;EVM0024062;EVM0022257;EVM…
GO:0016798	hydrolase activity, acting on glycosyl bonds	1	molecular_function	EVM0002563;EVM0006730;EVM0001078;EVM0013639;EVM0013986;EVM0005659;EVM0004016
GO:0009311	oligosaccharide metabolic process	1	biological_process	EVM0016858;EVM0006730;EVM0001078;EVM0013986
GO:0016787	hydrolase activity	1	molecular_function	EVM0002563;EVM0013937;EVM0022319;EVM0013983;EVM0007586;EVM0008555;EVM0017531;EVM0008414;EVM0011085;EVM0015096;EVM0006730;EVM0001078;EVM0010210;EVM0013639;EVM0008295;EVM0015155;EVM0013986;EVM0000219;EVM0015936;EVM0005659;EVM0004016;EVM0015304;EVM0022891;EVM0004520;EVM0021860;EVM0023180;EVM0011976;EVM0023138;EVM0009379;EVM0022501
GO:0051784	negative regulation of nuclear division	1	biological_process	EVM0012271;EVM0015304
GO:0032300	mismatch repair complex	1	cellular_component	EVM0015155;EVM0015304
GO:0004564	beta-fructofuranosidase activity	1	molecular_function	EVM0006730;EVM0013639
GO:0015804	neutral amino acid transport	1	biological_process	EVM0002099;EVM0002019
GO:0009966	regulation of signal transduction	1	biological_process	EVM0021069;EVM0008414;EVM0013817;EVM0021530;EVM0020029;EVM0008295;EVM0014270;EVM0008398;EVM0022891
GO:0023051	regulation of signaling	1	biological_process	EVM0021069;EVM0008414;EVM0013817;EVM0021530;EVM0020029;EVM0008295;EVM0014270;EVM0008398;EVM0022891
GO:0019395	fatty acid oxidation	1	biological_process	EVM0008800;EVM0021530;EVM0014270
GO:0031326	regulation of cellular biosynthetic process	1	biological_process	EVM0003043;EVM0021741;EVM0019200;EVM0006174;EVM0002087;EVM0005040;EVM0006853;EVM0023104;EVM0008555;EVM0005850;EVM0006148;EVM0008304;EVM0001258;EVM0015503;EVM0006828;EVM0015392;EVM0024167;EVM0020029;EVM0022128;EVM0018311;EVM0021138;EVM0022797;EVM0010932;EVM0008398;EVM0000626;EVM0017355;EVM0006619;EVM0002977;EVM0012387;EVM0008446;EVM0005716;EVM0014424;EVM0015369;EVM0007680;EVM0020810;EVM0024062;EVM…
GO:0048466	androecium development	1	biological_process	EVM0006460;EVM0008849;EVM0021316;EVM0022891
GO:0048443	stamen development	1	biological_process	EVM0006460;EVM0008849;EVM0021316;EVM0022891
GO:0003677	DNA binding	1	molecular_function	EVM0019200;EVM0002087;EVM0005040;EVM0006828;EVM0015392;EVM0022128;EVM0018311;EVM0015155;EVM0015155;EVM0019356;EVM0000626;EVM0017355;EVM0017355;EVM0015304;EVM0015304;EVM0005716
GO:0008152	metabolic process	1	biological_process	EVM0015310;EVM0021183;EVM0008050;EVM0007078;EVM0002563;EVM0013937;EVM0022317;EVM0022319;EVM0024588;EVM0010139;EVM0013983;EVM0005040;EVM0007586;EVM0001120;EVM0008555;EVM0011705;EVM0016858;EVM0017531;EVM0008465;EVM0014031;EVM0008414;EVM0003526;EVM0019723;EVM0011085;EVM0000806;EVM0017392;EVM0024137;EVM0021849;EVM0023416;EVM0014443;EVM0011451;EVM0015096;EVM0006730;EVM0001078;EVM0024468;EVM0003779;EVM…
GO:0006972	hyperosmotic response	1	biological_process	EVM0003450;EVM0003666;EVM0020998;EVM0004329
GO:0010646	regulation of cell communication	1	biological_process	EVM0021069;EVM0008414;EVM0013817;EVM0021530;EVM0020029;EVM0008295;EVM0014270;EVM0008398;EVM0022891
GO:0005337	nucleoside transmembrane transporter activity	1	molecular_function	EVM0006463;EVM0008800
GO:0006298	mismatch repair	1	biological_process	EVM0015155;EVM0015304
GO:0000295	adenine nucleotide transmembrane transporter activity	1	molecular_function	EVM0008800;EVM0000309
GO:0015216	purine nucleotide transmembrane transporter activity	1	molecular_function	EVM0008800;EVM0000309
GO:0005346	purine ribonucleotide transmembrane transporter activity	1	molecular_function	EVM0008800;EVM0000309
GO:0007088	regulation of mitotic nuclear division	1	biological_process	EVM0012271;EVM0015369
GO:0010468	regulation of gene expression	1	biological_process	EVM0003043;EVM0021741;EVM0019200;EVM0006174;EVM0002087;EVM0005040;EVM0006853;EVM0023104;EVM0008555;EVM0003526;EVM0005850;EVM0006148;EVM0008304;EVM0017392;EVM0001258;EVM0015503;EVM0006828;EVM0015392;EVM0024167;EVM0020029;EVM0022128;EVM0018311;EVM0021138;EVM0022797;EVM0010932;EVM0008398;EVM0000626;EVM0017355;EVM0006619;EVM0002977;EVM0012387;EVM0008446;EVM0005716;EVM0014424;EVM0007680;EVM0020810;EVM…
GO:0080167	response to karrikin	1	biological_process	EVM0015503;EVM0012773;EVM0013986;EVM0009967;EVM0022257;EVM0020986;EVM0001886
GO:0006081	cellular aldehyde metabolic process	1	biological_process	EVM0014031;EVM0021530;EVM0015636
GO:0006598	polyamine catabolic process	1	biological_process	EVM0013157
GO:0006591	ornithine metabolic process	1	biological_process	EVM0004329
GO:0042402	cellular biogenic amine catabolic process	1	biological_process	EVM0013157
GO:0009102	biotin biosynthetic process	1	biological_process	EVM0015310
GO:0030466	chromatin silencing at silent mating-type cassette	1	biological_process	EVM0023138
GO:0047251	thiohydroximate beta-D-glucosyltransferase activity	1	molecular_function	EVM0003779
GO:0032324	molybdopterin cofactor biosynthetic process	1	biological_process	EVM0011944
GO:1901072	glucosamine-containing compound catabolic process	1	biological_process	EVM0004016
GO:0018216	peptidyl-arginine methylation	1	biological_process	EVM0007078
GO:0015817	histidine transport	1	biological_process	EVM0020998
GO:0047617	acyl-CoA hydrolase activity	1	molecular_function	EVM0022319
GO:0006554	lysine catabolic process	1	biological_process	EVM0012773
GO:0046416	D-amino acid metabolic process	1	biological_process	EVM0013262
GO:0006768	biotin metabolic process	1	biological_process	EVM0015310
GO:0050302	indole-3-acetaldehyde oxidase activity	1	molecular_function	EVM0021849
GO:0009263	deoxyribonucleotide biosynthetic process	1	biological_process	EVM0011705
GO:0009262	deoxyribonucleotide metabolic process	1	biological_process	EVM0011705
GO:0016289	CoA hydrolase activity	1	molecular_function	EVM0022319
GO:0043545	molybdopterin cofactor metabolic process	1	biological_process	EVM0011944
GO:0051447	negative regulation of meiotic cell cycle	1	biological_process	EVM0015304
GO:0004326	tetrahydrofolylpolyglutamate synthase activity	1	molecular_function	EVM0001779
GO:0048442	sepal development	1	biological_process	EVM0006460
GO:0071545	inositol phosphate catabolic process	1	biological_process	EVM0021860
GO:0048464	flower calyx development	1	biological_process	EVM0006460
GO:0046901	tetrahydrofolylpolyglutamate biosynthetic process	1	biological_process	EVM0001779
GO:0045835	negative regulation of meiotic nuclear division	1	biological_process	EVM0015304
GO:0009202	deoxyribonucleoside triphosphate biosynthetic process	1	biological_process	EVM0011705
GO:0009200	deoxyribonucleoside triphosphate metabolic process	1	biological_process	EVM0011705
GO:0009413	response to flooding	1	biological_process	EVM0004329
GO:0004352	glutamate dehydrogenase (NAD+) activity	1	molecular_function	EVM0019723
GO:0018479	benzaldehyde dehydrogenase (NAD+) activity	1	molecular_function	EVM0021849
GO:0005290	L-histidine transmembrane transporter activity	1	molecular_function	EVM0020998
GO:0002263	cell activation involved in immune response	1	biological_process	EVM0015304
GO:0002443	leukocyte mediated immunity	1	biological_process	EVM0015304
GO:0051189	prosthetic group metabolic process	1	biological_process	EVM0011944
GO:0046348	amino sugar catabolic process	1	biological_process	EVM0004016
GO:0051015	actin filament binding	1	molecular_function	EVM0021257
GO:0047130	saccharopine dehydrogenase (NADP+, L-lysine-forming) activity	1	molecular_function	EVM0012773
GO:0000291	nuclear-transcribed mRNA catabolic process, exonucleolytic	1	biological_process	EVM0017392
GO:0046440	L-lysine metabolic process	1	biological_process	EVM0012773
GO:0046855	inositol phosphate dephosphorylation	1	biological_process	EVM0021860
GO:0016231	beta-N-acetylglucosaminidase activity	1	molecular_function	EVM0005659
GO:0046592	polyamine oxidase activity	1	molecular_function	EVM0013157
GO:0046838	phosphorylated carbohydrate dephosphorylation	1	biological_process	EVM0021860
GO:0019605	butyrate metabolic process	1	biological_process	EVM0014031
GO:0002366	leukocyte activation involved in immune response	1	biological_process	EVM0015304
GO:0004753	saccharopine dehydrogenase activity	1	molecular_function	EVM0012773
GO:0019477	L-lysine catabolic process	1	biological_process	EVM0012773
GO:0015822	ornithine transport	1	biological_process	EVM0020998
GO:0009310	amine catabolic process	1	biological_process	EVM0013157
GO:0000064	L-ornithine transmembrane transporter activity	1	molecular_function	EVM0020998
GO:0016274	protein-arginine N-methyltransferase activity	1	molecular_function	EVM0007078
GO:0016273	arginine N-methyltransferase activity	1	molecular_function	EVM0007078
GO:0018195	peptidyl-arginine modification	1	biological_process	EVM0007078
GO:0015866	ADP transport	1	biological_process	EVM0008800
GO:0006777	Mo-molybdopterin cofactor biosynthetic process	1	biological_process	EVM0011944
GO:0018488	aryl-aldehyde oxidase activity	1	molecular_function	EVM0021849
GO:0047268	galactinol-raffinose galactosyltransferase activity	1	molecular_function	EVM0009967
GO:0004534	5'-3' exoribonuclease activity	1	molecular_function	EVM0015936
GO:0006022	aminoglycan metabolic process	1	biological_process	EVM0004016
GO:0003987	acetate-CoA ligase activity	1	molecular_function	EVM0014031
GO:0019720	Mo-molybdopterin cofactor metabolic process	1	biological_process	EVM0011944
GO:0008409	5'-3' exonuclease activity	1	molecular_function	EVM0015936
GO:0071949	FAD binding	1	molecular_function	EVM0021849
GO:0035246	peptidyl-arginine N-methylation	1	biological_process	EVM0007078
GO:0016444	somatic cell DNA recombination	1	biological_process	EVM0015304
GO:1901474	azole transmembrane transporter activity	1	molecular_function	EVM0020998
GO:0047760	butyrate-CoA ligase activity	1	molecular_function	EVM0014031
GO:0047746	chlorophyllase activity	1	molecular_function	EVM0009379
GO:0042631	cellular response to water deprivation	1	biological_process	EVM0001120;EVM0010429;EVM0020757;EVM0006281
GO:0046943	carboxylic acid transmembrane transporter activity	1	molecular_function	EVM0002099;EVM0020998;EVM0000171;EVM0002019
GO:0005342	organic acid transmembrane transporter activity	1	molecular_function	EVM0002099;EVM0020998;EVM0000171;EVM0002019
GO:0071462	cellular response to water stimulus	1	biological_process	EVM0001120;EVM0010429;EVM0020757;EVM0006281
GO:0046148	pigment biosynthetic process	1	biological_process	EVM0008050;EVM0022317;EVM0010139;EVM0002664;EVM0013826;EVM0013544

## Sheet: Salt  48h
id	description	p_fdr	namespace	genes_in_study
GO:0009414	response to water deprivation	0.004	biological_process	EVM0003043;EVM0010829;EVM0011746;EVM0016858;EVM0008414;EVM0013516;EVM0017861;EVM0009843;EVM0023117;EVM0020757;EVM0018311;EVM0008295;EVM0022157;EVM0014204;EVM0003666;EVM0012387;EVM0001120;EVM0000296;EVM0016093
GO:0009415	response to water	0.004	biological_process	EVM0003043;EVM0010829;EVM0011746;EVM0016858;EVM0008414;EVM0013516;EVM0017861;EVM0009843;EVM0023117;EVM0020757;EVM0018311;EVM0008295;EVM0022157;EVM0014204;EVM0003666;EVM0012387;EVM0001120;EVM0000296;EVM0016093
GO:0009737	response to abscisic acid	0.006	biological_process	EVM0003043;EVM0004016;EVM0010829;EVM0011746;EVM0019836;EVM0002603;EVM0008414;EVM0001258;EVM0023416;EVM0003450;EVM0003671;EVM0023069;EVM0009843;EVM0023117;EVM0007448;EVM0008295;EVM0022797;EVM0022157;EVM0014204;EVM0012387;EVM0015069;EVM0000705;EVM0020172;EVM0014170;EVM0012105
GO:0001101	response to acid chemical	0.01	biological_process	EVM0003043;EVM0004016;EVM0010829;EVM0011746;EVM0016858;EVM0019836;EVM0002603;EVM0005423;EVM0008414;EVM0001258;EVM0013516;EVM0023416;EVM0003450;EVM0017861;EVM0003671;EVM0023069;EVM0009843;EVM0023117;EVM0021530;EVM0007448;EVM0020757;EVM0020029;EVM0018311;EVM0008295;EVM0022797;EVM0022157;EVM0014204;EVM0000626;EVM0003666;EVM0023104;EVM0012387;EVM0001120;EVM0015069;EVM0000705;EVM0012697;EVM0000296;EVM…
GO:1901700	response to oxygen-containing compound	0.01	biological_process	EVM0003043;EVM0004495;EVM0004016;EVM0010829;EVM0011746;EVM0016858;EVM0019836;EVM0002603;EVM0005423;EVM0008414;EVM0001258;EVM0013516;EVM0023416;EVM0003450;EVM0017861;EVM0020059;EVM0006730;EVM0015392;EVM0003671;EVM0023069;EVM0009843;EVM0023117;EVM0021530;EVM0007448;EVM0020757;EVM0020029;EVM0018311;EVM0008295;EVM0022797;EVM0022157;EVM0014204;EVM0000626;EVM0003666;EVM0023104;EVM0012387;EVM0001120;EVM…
GO:0097305	response to alcohol	0.012	biological_process	EVM0003043;EVM0004016;EVM0010829;EVM0011746;EVM0019836;EVM0002603;EVM0008414;EVM0001258;EVM0023416;EVM0003450;EVM0003671;EVM0023069;EVM0009843;EVM0023117;EVM0021530;EVM0007448;EVM0008295;EVM0022797;EVM0022157;EVM0014204;EVM0012387;EVM0015069;EVM0000705;EVM0020172;EVM0014170;EVM0012105
GO:0009628	response to abiotic stimulus	0.012	biological_process	EVM0003043;EVM0008050;EVM0004016;EVM0010139;EVM0010829;EVM0011746;EVM0016858;EVM0019836;EVM0008414;EVM0019723;EVM0001258;EVM0013516;EVM0002102;EVM0023416;EVM0003450;EVM0017861;EVM0020761;EVM0022838;EVM0020059;EVM0015096;EVM0001078;EVM0003671;EVM0003572;EVM0009843;EVM0023117;EVM0021530;EVM0020757;EVM0020029;EVM0018311;EVM0008295;EVM0022797;EVM0022157;EVM0002664;EVM0014204;EVM0005699;EVM0013986;EVM…
GO:0006950	response to stress	0.014	biological_process	EVM0003043;EVM0004495;EVM0021741;EVM0004016;EVM0010829;EVM0011746;EVM0020169;EVM0016858;EVM0019836;EVM0008414;EVM0019723;EVM0008304;EVM0001258;EVM0021846;EVM0013516;EVM0002102;EVM0023416;EVM0003450;EVM0012660;EVM0017861;EVM0020059;EVM0015096;EVM0006730;EVM0001078;EVM0015392;EVM0003779;EVM0003671;EVM0003572;EVM0023069;EVM0009843;EVM0023117;EVM0003950;EVM0021530;EVM0020757;EVM0020029;EVM0018311;EVM…
GO:0006970	response to osmotic stress	0.014	biological_process	EVM0004016;EVM0010829;EVM0011746;EVM0019836;EVM0019723;EVM0001258;EVM0002102;EVM0023416;EVM0003450;EVM0017861;EVM0015096;EVM0003671;EVM0003572;EVM0023117;EVM0018311;EVM0022797;EVM0022157;EVM0014204;EVM0000219;EVM0003666;EVM0012387;EVM0012697;EVM0000296;EVM0020172;EVM0006148
GO:0033993	response to lipid	0.014	biological_process	EVM0003043;EVM0004016;EVM0010829;EVM0011746;EVM0019836;EVM0002603;EVM0008414;EVM0001258;EVM0023416;EVM0003450;EVM0003671;EVM0023069;EVM0009843;EVM0023117;EVM0021530;EVM0007448;EVM0008295;EVM0022797;EVM0022157;EVM0014204;EVM0000626;EVM0023104;EVM0012387;EVM0015069;EVM0000705;EVM0020172;EVM0014170;EVM0012105
GO:0009651	response to salt stress	0.022	biological_process	EVM0004016;EVM0010829;EVM0011746;EVM0019836;EVM0019723;EVM0001258;EVM0002102;EVM0023416;EVM0003450;EVM0015096;EVM0003671;EVM0003572;EVM0023117;EVM0018311;EVM0022797;EVM0022157;EVM0014204;EVM0000219;EVM0003666;EVM0012387;EVM0012697;EVM0020172;EVM0006148
GO:0050832	defense response to fungus	0.11	biological_process	EVM0021741;EVM0008304;EVM0013516;EVM0002102;EVM0003572;EVM0023069;EVM0020029;EVM0003461;EVM0014204;EVM0000219;EVM0005659;EVM0017482
GO:0050896	response to stimulus	0.148	biological_process	EVM0003043;EVM0004495;EVM0021741;EVM0008050;EVM0004016;EVM0010139;EVM0010829;EVM0020081;EVM0002099;EVM0011746;EVM0020169;EVM0016858;EVM0019836;EVM0002603;EVM0005423;EVM0008414;EVM0019723;EVM0008304;EVM0001258;EVM0021846;EVM0013516;EVM0002102;EVM0023416;EVM0003450;EVM0012660;EVM0017861;EVM0020761;EVM0022838;EVM0020059;EVM0010627;EVM0015096;EVM0006730;EVM0001078;EVM0015392;EVM0003779;EVM0003671;EVM…
GO:0097438	exit from dormancy	0.254	biological_process	EVM0013516;EVM0020631
GO:0048838	release of seed from dormancy	0.254	biological_process	EVM0013516;EVM0020631
GO:0008843	endochitinase activity	0.254	molecular_function	EVM0004016;EVM0005659
GO:0009719	response to endogenous stimulus	0.426	biological_process	EVM0003043;EVM0004495;EVM0004016;EVM0010829;EVM0011746;EVM0019836;EVM0002603;EVM0008414;EVM0001258;EVM0023416;EVM0003450;EVM0022838;EVM0015392;EVM0003671;EVM0023069;EVM0009843;EVM0023117;EVM0021530;EVM0007448;EVM0020029;EVM0022128;EVM0018311;EVM0008295;EVM0022797;EVM0022157;EVM0014204;EVM0000626;EVM0023104;EVM0012387;EVM0020223;EVM0015069;EVM0000705;EVM0012697;EVM0020172;EVM0006148;EVM0014170;EVM…
GO:0042221	response to chemical	0.506	biological_process	EVM0003043;EVM0004495;EVM0004016;EVM0010829;EVM0020081;EVM0011746;EVM0016858;EVM0019836;EVM0002603;EVM0005423;EVM0008414;EVM0019723;EVM0001258;EVM0013516;EVM0023416;EVM0003450;EVM0017861;EVM0022838;EVM0020059;EVM0010627;EVM0006730;EVM0015392;EVM0003671;EVM0023069;EVM0022833;EVM0009843;EVM0023117;EVM0021530;EVM0007448;EVM0020757;EVM0020029;EVM0022128;EVM0018311;EVM0008295;EVM0022797;EVM0022157;EVM…
GO:0010200	response to chitin	0.554	biological_process	EVM0004495;EVM0015392;EVM0020029;EVM0014204;EVM0020223;EVM0015069;EVM0012697;EVM0006148
GO:0009620	response to fungus	0.572	biological_process	EVM0021741;EVM0008304;EVM0013516;EVM0002102;EVM0003572;EVM0023069;EVM0020029;EVM0003461;EVM0014204;EVM0000219;EVM0005659;EVM0020172;EVM0017482
GO:0010033	response to organic substance	0.59	biological_process	EVM0003043;EVM0004495;EVM0004016;EVM0010829;EVM0011746;EVM0016858;EVM0019836;EVM0002603;EVM0005423;EVM0008414;EVM0001258;EVM0023416;EVM0003450;EVM0022838;EVM0015392;EVM0003671;EVM0023069;EVM0009843;EVM0023117;EVM0021530;EVM0007448;EVM0020029;EVM0022128;EVM0018311;EVM0008295;EVM0022797;EVM0022157;EVM0014204;EVM0000626;EVM0023104;EVM0012387;EVM0020223;EVM0015069;EVM0000705;EVM0012697;EVM0020172;EVM…
GO:0010035	response to inorganic substance	0.602	biological_process	EVM0003043;EVM0010829;EVM0020081;EVM0011746;EVM0016858;EVM0019836;EVM0008414;EVM0019723;EVM0013516;EVM0017861;EVM0020059;EVM0010627;EVM0006730;EVM0009843;EVM0023117;EVM0020757;EVM0018311;EVM0008295;EVM0022797;EVM0022157;EVM0014204;EVM0003666;EVM0012387;EVM0001120;EVM0012697;EVM0000296;EVM0020708;EVM0016093
GO:0016879	ligase activity, forming carbon-nitrogen bonds	0.612	molecular_function	EVM0007772;EVM0024588;EVM0012147;EVM0011144;EVM0022838;EVM0024464;EVM0020257;EVM0021829;EVM0001779;EVM0017482
GO:0003700	transcription factor activity, sequence-specific DNA binding	0.72	molecular_function	EVM0003043;EVM0004495;EVM0021741;EVM0006174;EVM0005040;EVM0010611;EVM0019722;EVM0005850;EVM0008304;EVM0001258;EVM0015392;EVM0007069;EVM0003950;EVM0022128;EVM0018311;EVM0022797;EVM0021138;EVM0014204;EVM0001848;EVM0008398;EVM0000626;EVM0008718;EVM0023104;EVM0002977;EVM0012387;EVM0005716;EVM0012697;EVM0008742;EVM0020810;EVM0022257;EVM0020172;EVM0006148;EVM0014170;EVM0016709
GO:0001071	nucleic acid binding transcription factor activity	0.72	molecular_function	EVM0003043;EVM0004495;EVM0021741;EVM0006174;EVM0005040;EVM0010611;EVM0019722;EVM0005850;EVM0008304;EVM0001258;EVM0015392;EVM0007069;EVM0003950;EVM0022128;EVM0018311;EVM0022797;EVM0021138;EVM0014204;EVM0001848;EVM0008398;EVM0000626;EVM0008718;EVM0023104;EVM0002977;EVM0012387;EVM0005716;EVM0012697;EVM0008742;EVM0020810;EVM0022257;EVM0020172;EVM0006148;EVM0014170;EVM0016709
GO:1902644	tertiary alcohol metabolic process	0.748	biological_process	EVM0013516;EVM0003666;EVM0020631
GO:0009687	abscisic acid metabolic process	0.748	biological_process	EVM0013516;EVM0003666;EVM0020631
GO:0043288	apocarotenoid metabolic process	0.748	biological_process	EVM0013516;EVM0003666;EVM0020631
GO:0004722	protein serine/threonine phosphatase activity	0.77	molecular_function	EVM0008414;EVM0023069;EVM0008295;EVM0012105
GO:0016881	acid-amino acid ligase activity	0.782	molecular_function	EVM0007772;EVM0024588;EVM0012147;EVM0011144;EVM0022838;EVM0020257;EVM0021829;EVM0001779;EVM0017482
GO:0004553	hydrolase activity, hydrolyzing O-glycosyl compounds	0.81	molecular_function	EVM0004016;EVM0002563;EVM0006730;EVM0001078;EVM0013639;EVM0013986;EVM0013318;EVM0005659
GO:0009738	abscisic acid-activated signaling pathway	0.81	biological_process	EVM0010829;EVM0023069;EVM0023117;EVM0008295;EVM0012387;EVM0012105
GO:0009725	response to hormone	0.824	biological_process	EVM0003043;EVM0004016;EVM0010829;EVM0011746;EVM0019836;EVM0002603;EVM0008414;EVM0001258;EVM0023416;EVM0003450;EVM0022838;EVM0003671;EVM0023069;EVM0009843;EVM0023117;EVM0021530;EVM0007448;EVM0022128;EVM0018311;EVM0008295;EVM0022797;EVM0022157;EVM0014204;EVM0000626;EVM0023104;EVM0012387;EVM0015069;EVM0000705;EVM0012697;EVM0020172;EVM0014170;EVM0012105
GO:0090599	alpha-glucosidase activity	0.828	molecular_function	EVM0006730;EVM0013639
GO:0004575	sucrose alpha-glucosidase activity	0.828	molecular_function	EVM0006730;EVM0013639
GO:0004558	alpha-1,4-glucosidase activity	0.828	molecular_function	EVM0006730;EVM0013639
GO:0016157	sucrose synthase activity	0.828	molecular_function	EVM0016858;EVM0023040
GO:0004568	chitinase activity	0.88	molecular_function	EVM0004016;EVM0002563;EVM0005659
GO:0008234	cysteine-type peptidase activity	0.89	molecular_function	EVM0002102;EVM0024464;EVM0000219;EVM0011976
GO:1901615	organic hydroxy compound metabolic process	0.92	biological_process	EVM0008050;EVM0010139;EVM0013516;EVM0017661;EVM0020761;EVM0003702;EVM0021530;EVM0002664;EVM0003666;EVM0020631
GO:0019219	regulation of nucleobase-containing compound metabolic process	0.922	biological_process	EVM0003043;EVM0004495;EVM0021741;EVM0006174;EVM0005040;EVM0012023;EVM0010611;EVM0019722;EVM0005850;EVM0008304;EVM0001258;EVM0017661;EVM0020059;EVM0015392;EVM0007069;EVM0003950;EVM0020029;EVM0022128;EVM0018311;EVM0022797;EVM0021138;EVM0014204;EVM0001848;EVM0008398;EVM0000626;EVM0008718;EVM0023104;EVM0002977;EVM0012387;EVM0005716;EVM0012697;EVM0008742;EVM0020810;EVM0022257;EVM0020172;EVM0006148;EVM…
GO:0006355	regulation of transcription, DNA-templated	0.928	biological_process	EVM0003043;EVM0004495;EVM0021741;EVM0006174;EVM0005040;EVM0012023;EVM0010611;EVM0019722;EVM0005850;EVM0008304;EVM0001258;EVM0020059;EVM0015392;EVM0007069;EVM0003950;EVM0020029;EVM0022128;EVM0018311;EVM0022797;EVM0021138;EVM0014204;EVM0001848;EVM0008398;EVM0000626;EVM0008718;EVM0023104;EVM0002977;EVM0012387;EVM0005716;EVM0012697;EVM0008742;EVM0020810;EVM0022257;EVM0020172;EVM0006148;EVM0023138;EVM…
GO:1903506	regulation of nucleic acid-templated transcription	0.928	biological_process	EVM0003043;EVM0004495;EVM0021741;EVM0006174;EVM0005040;EVM0012023;EVM0010611;EVM0019722;EVM0005850;EVM0008304;EVM0001258;EVM0020059;EVM0015392;EVM0007069;EVM0003950;EVM0020029;EVM0022128;EVM0018311;EVM0022797;EVM0021138;EVM0014204;EVM0001848;EVM0008398;EVM0000626;EVM0008718;EVM0023104;EVM0002977;EVM0012387;EVM0005716;EVM0012697;EVM0008742;EVM0020810;EVM0022257;EVM0020172;EVM0006148;EVM0023138;EVM…
GO:0035251	UDP-glucosyltransferase activity	0.93	molecular_function	EVM0008050;EVM0010139;EVM0016858;EVM0020761;EVM0003779;EVM0002664;EVM0023040
GO:2001141	regulation of RNA biosynthetic process	0.936	biological_process	EVM0003043;EVM0004495;EVM0021741;EVM0006174;EVM0005040;EVM0012023;EVM0010611;EVM0019722;EVM0005850;EVM0008304;EVM0001258;EVM0020059;EVM0015392;EVM0007069;EVM0003950;EVM0020029;EVM0022128;EVM0018311;EVM0022797;EVM0021138;EVM0014204;EVM0001848;EVM0008398;EVM0000626;EVM0008718;EVM0023104;EVM0002977;EVM0012387;EVM0005716;EVM0012697;EVM0008742;EVM0020810;EVM0022257;EVM0020172;EVM0006148;EVM0023138;EVM…
GO:0051252	regulation of RNA metabolic process	0.94	biological_process	EVM0003043;EVM0004495;EVM0021741;EVM0006174;EVM0005040;EVM0012023;EVM0010611;EVM0019722;EVM0005850;EVM0008304;EVM0001258;EVM0020059;EVM0015392;EVM0007069;EVM0003950;EVM0020029;EVM0022128;EVM0018311;EVM0022797;EVM0021138;EVM0014204;EVM0001848;EVM0008398;EVM0000626;EVM0008718;EVM0023104;EVM0002977;EVM0012387;EVM0005716;EVM0012697;EVM0008742;EVM0020810;EVM0022257;EVM0020172;EVM0006148;EVM0023138;EVM…
GO:0010295	(+)-abscisic acid 8'-hydroxylase activity	0.94	molecular_function	EVM0013516;EVM0020631
GO:0008061	chitin binding	0.94	molecular_function	EVM0005659;EVM0020223
GO:0016798	hydrolase activity, acting on glycosyl bonds	0.972	molecular_function	EVM0004016;EVM0002563;EVM0006730;EVM0001078;EVM0013639;EVM0013986;EVM0013318;EVM0005659
GO:0051171	regulation of nitrogen compound metabolic process	0.976	biological_process	EVM0003043;EVM0004495;EVM0021741;EVM0006174;EVM0005040;EVM0012023;EVM0010611;EVM0019722;EVM0005850;EVM0008304;EVM0001258;EVM0017661;EVM0020059;EVM0015392;EVM0007069;EVM0003950;EVM0021530;EVM0020029;EVM0022128;EVM0018311;EVM0022797;EVM0021138;EVM0014204;EVM0001848;EVM0008398;EVM0000626;EVM0008718;EVM0023104;EVM0002977;EVM0012387;EVM0005716;EVM0012697;EVM0008742;EVM0020810;EVM0022257;EVM0020172;EVM…
GO:2000112	regulation of cellular macromolecule biosynthetic process	0.978	biological_process	EVM0003043;EVM0004495;EVM0021741;EVM0006174;EVM0005040;EVM0012023;EVM0010611;EVM0019722;EVM0005850;EVM0008304;EVM0001258;EVM0017661;EVM0020059;EVM0015392;EVM0007069;EVM0003950;EVM0020029;EVM0022128;EVM0018311;EVM0022797;EVM0021138;EVM0014204;EVM0001848;EVM0008398;EVM0000626;EVM0008718;EVM0023104;EVM0002977;EVM0012387;EVM0005716;EVM0012697;EVM0008742;EVM0020810;EVM0022257;EVM0020172;EVM0006148;EVM…
GO:0046527	glucosyltransferase activity	0.99	molecular_function	EVM0008050;EVM0010139;EVM0016858;EVM0020761;EVM0003779;EVM0002664;EVM0023040
GO:0071229	cellular response to acid chemical	0.994	biological_process	EVM0003043;EVM0010829;EVM0023069;EVM0023117;EVM0020757;EVM0020029;EVM0008295;EVM0000626;EVM0012387;EVM0001120;EVM0016093;EVM0012105
GO:0004029	aldehyde dehydrogenase (NAD) activity	0.996	molecular_function	EVM0011746;EVM0021849;EVM0021530
GO:0016597	amino acid binding	0.996	molecular_function	EVM0018059;EVM0020757;EVM0001120;EVM0016093
GO:0010431	seed maturation	0.996	biological_process	EVM0016858;EVM0013516;EVM0003666;EVM0020631
GO:0010556	regulation of macromolecule biosynthetic process	0.996	biological_process	EVM0003043;EVM0004495;EVM0021741;EVM0006174;EVM0005040;EVM0012023;EVM0010611;EVM0019722;EVM0005850;EVM0008304;EVM0001258;EVM0017661;EVM0020059;EVM0015392;EVM0007069;EVM0003950;EVM0020029;EVM0022128;EVM0018311;EVM0022797;EVM0021138;EVM0014204;EVM0001848;EVM0008398;EVM0000626;EVM0008718;EVM0023104;EVM0002977;EVM0012387;EVM0005716;EVM0012697;EVM0008742;EVM0020810;EVM0022257;EVM0020172;EVM0006148;EVM…
GO:0010243	response to organonitrogen compound	0.996	biological_process	EVM0004495;EVM0015392;EVM0020029;EVM0014204;EVM0020223;EVM0015069;EVM0012697;EVM0006148
GO:0098542	defense response to other organism	0.996	biological_process	EVM0021741;EVM0008304;EVM0013516;EVM0002102;EVM0012660;EVM0015096;EVM0015392;EVM0003779;EVM0003572;EVM0023069;EVM0020029;EVM0003461;EVM0014204;EVM0000219;EVM0005659;EVM0012283;EVM0017482
GO:0022611	dormancy process	0.996	biological_process	EVM0013516;EVM0003666;EVM0020631
GO:0010162	seed dormancy process	0.996	biological_process	EVM0013516;EVM0003666;EVM0020631
GO:0098656	anion transmembrane transport	0.996	biological_process	EVM0002099;EVM0017558;EVM0000171;EVM0002019;EVM0009021
GO:0071215	cellular response to abscisic acid stimulus	0.996	biological_process	EVM0010829;EVM0023069;EVM0023117;EVM0008295;EVM0012387;EVM0012105
GO:0035435	phosphate ion transmembrane transport	0.996	biological_process	EVM0017558;EVM0009021
GO:0015114	phosphate ion transmembrane transporter activity	0.996	molecular_function	EVM0017558;EVM0009021
GO:0009788	negative regulation of abscisic acid-activated signaling pathway	0.996	biological_process	EVM0008414;EVM0008295;EVM0008398
GO:1905958	negative regulation of cellular response to alcohol	0.996	biological_process	EVM0008414;EVM0008295;EVM0008398
GO:0050502	cis-zeatin O-beta-D-glucosyltransferase activity	0.996	molecular_function	EVM0008050;EVM0010139;EVM0002664
GO:1901420	negative regulation of response to alcohol	0.996	biological_process	EVM0008414;EVM0008295;EVM0008398
GO:0050403	trans-zeatin O-beta-D-glucosyltransferase activity	0.996	molecular_function	EVM0008050;EVM0010139;EVM0002664
GO:1905957	regulation of cellular response to alcohol	0.996	biological_process	EVM0008414;EVM0008295;EVM0014270;EVM0008398
GO:0009787	regulation of abscisic acid-activated signaling pathway	0.996	biological_process	EVM0008414;EVM0008295;EVM0014270;EVM0008398
GO:1901698	response to nitrogen compound	0.996	biological_process	EVM0004495;EVM0015392;EVM0020029;EVM0014204;EVM0020223;EVM0015069;EVM0012697;EVM0020708;EVM0006148;EVM0023138
GO:0009605	response to external stimulus	0.996	biological_process	EVM0004495;EVM0021741;EVM0002099;EVM0020169;EVM0008304;EVM0013516;EVM0002102;EVM0012660;EVM0015096;EVM0015392;EVM0003779;EVM0003572;EVM0023069;EVM0021530;EVM0020757;EVM0020029;EVM0003461;EVM0014204;EVM0000219;EVM0010169;EVM0012387;EVM0005659;EVM0001120;EVM0020223;EVM0005278;EVM0012283;EVM0006405;EVM0020172;EVM0009021;EVM0017482;EVM0016093
GO:1901419	regulation of response to alcohol	0.996	biological_process	EVM0008414;EVM0008295;EVM0014270;EVM0008398
GO:0031326	regulation of cellular biosynthetic process	0.998	biological_process	EVM0003043;EVM0004495;EVM0021741;EVM0006174;EVM0005040;EVM0012023;EVM0010611;EVM0019722;EVM0005850;EVM0008304;EVM0001258;EVM0017661;EVM0020059;EVM0015392;EVM0007069;EVM0003950;EVM0020029;EVM0022128;EVM0018311;EVM0022797;EVM0021138;EVM0014204;EVM0001848;EVM0008398;EVM0000626;EVM0008718;EVM0023104;EVM0002977;EVM0012387;EVM0005716;EVM0012697;EVM0008742;EVM0020810;EVM0022257;EVM0020172;EVM0006148;EVM…
GO:0004842	ubiquitin-protein transferase activity	0.998	molecular_function	EVM0007772;EVM0024588;EVM0012147;EVM0011144;EVM0020257;EVM0021829;EVM0017482
GO:0016623	oxidoreductase activity, acting on the aldehyde or oxo group of donors, oxygen as acceptor	0.998	molecular_function	EVM0021849;EVM0021530
GO:0004031	aldehyde oxidase activity	0.998	molecular_function	EVM0021849;EVM0021530
GO:0006817	phosphate ion transport	0.998	biological_process	EVM0017558;EVM0009021
GO:0009889	regulation of biosynthetic process	1	biological_process	EVM0003043;EVM0004495;EVM0021741;EVM0006174;EVM0005040;EVM0012023;EVM0010611;EVM0019722;EVM0005850;EVM0008304;EVM0001258;EVM0017661;EVM0020059;EVM0015392;EVM0007069;EVM0003950;EVM0020029;EVM0022128;EVM0018311;EVM0022797;EVM0021138;EVM0014204;EVM0001848;EVM0008398;EVM0000626;EVM0008718;EVM0023104;EVM0002977;EVM0012387;EVM0005716;EVM0012697;EVM0008742;EVM0020810;EVM0022257;EVM0020172;EVM0006148;EVM…
GO:0051552	flavone metabolic process	1	biological_process	EVM0008050;EVM0010139;EVM0020761;EVM0002664
GO:0051553	flavone biosynthetic process	1	biological_process	EVM0008050;EVM0010139;EVM0020761;EVM0002664
GO:0071496	cellular response to external stimulus	1	biological_process	EVM0004495;EVM0020169;EVM0020757;EVM0010169;EVM0001120;EVM0006405;EVM0009021;EVM0016093
GO:0031668	cellular response to extracellular stimulus	1	biological_process	EVM0004495;EVM0020169;EVM0020757;EVM0010169;EVM0001120;EVM0006405;EVM0009021;EVM0016093
GO:0016874	ligase activity	1	molecular_function	EVM0007772;EVM0024588;EVM0012147;EVM0011144;EVM0022838;EVM0024464;EVM0020257;EVM0021829;EVM0001779;EVM0017482
GO:0003674	molecular_function	1	molecular_function	EVM0003043;EVM0016487;EVM0004495;EVM0021741;EVM0008050;EVM0006174;EVM0007772;EVM0004016;EVM0002563;EVM0018059;EVM0024588;EVM0010139;EVM0005040;EVM0012147;EVM0007586;EVM0002099;EVM0011746;EVM0010611;EVM0020169;EVM0016858;EVM0019836;EVM0008465;EVM0024327;EVM0004922;EVM0008414;EVM0019723;EVM0019722;EVM0005850;EVM0008304;EVM0001258;EVM0021849;EVM0013516;EVM0002102;EVM0023416;EVM0004729;EVM0017661;EVM…
GO:0019787	ubiquitin-like protein transferase activity	1	molecular_function	EVM0007772;EVM0024588;EVM0012147;EVM0011144;EVM0020257;EVM0021829;EVM0017482
GO:0043177	organic acid binding	1	molecular_function	EVM0018059;EVM0021530;EVM0020757;EVM0001120;EVM0016093
GO:0031406	carboxylic acid binding	1	molecular_function	EVM0018059;EVM0021530;EVM0020757;EVM0001120;EVM0016093
GO:0033106	cis-Golgi network membrane	1	cellular_component	EVM0008414;EVM0023385
GO:0015801	aromatic amino acid transport	1	biological_process	EVM0002099;EVM0002019
GO:0004721	phosphoprotein phosphatase activity	1	molecular_function	EVM0008414;EVM0023069;EVM0008295;EVM0012105
GO:0006952	defense response	1	biological_process	EVM0021741;EVM0008304;EVM0013516;EVM0002102;EVM0012660;EVM0015096;EVM0015392;EVM0003779;EVM0003572;EVM0023069;EVM0020029;EVM0003461;EVM0014204;EVM0000219;EVM0005659;EVM0020223;EVM0012283;EVM0017482
GO:1901617	organic hydroxy compound biosynthetic process	1	biological_process	EVM0008050;EVM0010139;EVM0017661;EVM0020761;EVM0003702;EVM0002664;EVM0003666
GO:0098661	inorganic anion transmembrane transport	1	biological_process	EVM0017558;EVM0009021
GO:0015295	solute:proton symporter activity	1	molecular_function	EVM0021751;EVM0022157
GO:0009313	oligosaccharide catabolic process	1	biological_process	EVM0006730;EVM0013986
GO:2000022	regulation of jasmonic acid mediated signaling pathway	1	biological_process	EVM0020029;EVM0014204
GO:0004364	glutathione transferase activity	1	molecular_function	EVM0020757;EVM0001120;EVM0016093
GO:0048583	regulation of response to stimulus	1	biological_process	EVM0012023;EVM0008414;EVM0020059;EVM0003950;EVM0021530;EVM0020757;EVM0020029;EVM0008295;EVM0014270;EVM0014204;EVM0008398;EVM0001120;EVM0006148;EVM0016093
GO:0080090	regulation of primary metabolic process	1	biological_process	EVM0003043;EVM0004495;EVM0021741;EVM0006174;EVM0005040;EVM0012023;EVM0010611;EVM0019722;EVM0005850;EVM0008304;EVM0001258;EVM0017661;EVM0020059;EVM0015392;EVM0007069;EVM0003950;EVM0021530;EVM0020029;EVM0022128;EVM0018311;EVM0022797;EVM0021138;EVM0014204;EVM0001848;EVM0008398;EVM0000626;EVM0008718;EVM0023104;EVM0002977;EVM0012387;EVM0005716;EVM0012697;EVM0008742;EVM0020810;EVM0022257;EVM0020172;EVM…
GO:2000030	regulation of response to red or far red light	1	biological_process	EVM0012023;EVM0020757;EVM0001120;EVM0016093
GO:0080043	quercetin 3-O-glucosyltransferase activity	1	molecular_function	EVM0008050;EVM0010139;EVM0020761;EVM0002664
GO:0005985	sucrose metabolic process	1	biological_process	EVM0016858;EVM0006730
GO:2000031	regulation of salicylic acid mediated signaling pathway	1	biological_process	EVM0020029;EVM0014204
GO:0080046	quercetin 4'-O-glucosyltransferase activity	1	molecular_function	EVM0008050;EVM0010139;EVM0002664
GO:0005984	disaccharide metabolic process	1	biological_process	EVM0016858;EVM0006730;EVM0001078
GO:0009311	oligosaccharide metabolic process	1	biological_process	EVM0016858;EVM0006730;EVM0001078;EVM0013986
GO:0035389	establishment of chromatin silencing at silent mating-type cassette	1	biological_process	EVM0023138
GO:0080165	callose deposition in phloem sieve plate	1	biological_process	EVM0023040
GO:0080169	cellular response to boron-containing substance deprivation	1	biological_process	EVM0004495
GO:0006343	establishment of chromatin silencing	1	biological_process	EVM0023138
GO:0034484	raffinose catabolic process	1	biological_process	EVM0013986
GO:0070547	L-tyrosine aminotransferase activity	1	molecular_function	EVM0003702
GO:0090052	regulation of chromatin silencing at centromere	1	biological_process	EVM0023138
GO:0042794	rRNA transcription from plastid promoter	1	biological_process	EVM0002041
GO:0005356	hydrogen:glucose symporter activity	1	molecular_function	EVM0022157
GO:0005358	high-affinity hydrogen:glucose symporter activity	1	molecular_function	EVM0022157
GO:0019776	Atg8 ligase activity	1	molecular_function	EVM0024464
GO:0006030	chitin metabolic process	1	biological_process	EVM0004016
GO:0006032	chitin catabolic process	1	biological_process	EVM0004016
GO:0035885	exochitinase activity	1	molecular_function	EVM0004016
GO:0016107	sesquiterpenoid catabolic process	1	biological_process	EVM0013516
GO:0043290	apocarotenoid catabolic process	1	biological_process	EVM0013516
GO:0046345	abscisic acid catabolic process	1	biological_process	EVM0013516
GO:0033530	raffinose metabolic process	1	biological_process	EVM0013986
GO:0010111	glyoxysome organization	1	biological_process	EVM0014270
GO:0000024	maltose biosynthetic process	1	biological_process	EVM0001078
GO:0010378	temperature compensation of the circadian clock	1	biological_process	EVM0020059
GO:0006026	aminoglycan catabolic process	1	biological_process	EVM0004016
GO:0009679	hexose:proton symporter activity	1	molecular_function	EVM0022157
GO:0052692	raffinose alpha-galactosidase activity	1	molecular_function	EVM0013986
GO:0004838	L-tyrosine:2-oxoglutarate aminotransferase activity	1	molecular_function	EVM0003702
GO:0009991	response to extracellular stimulus	1	biological_process	EVM0004495;EVM0020169;EVM0020757;EVM0010169;EVM0001120;EVM0006405;EVM0009021;EVM0016093
GO:0043295	glutathione binding	1	molecular_function	EVM0020757;EVM0001120;EVM0016093
GO:0072341	modified amino acid binding	1	molecular_function	EVM0020757;EVM0001120;EVM0016093
GO:1900750	oligopeptide binding	1	molecular_function	EVM0020757;EVM0001120;EVM0016093
GO:0005801	cis-Golgi network	1	cellular_component	EVM0008414;EVM0023385
GO:0015175	neutral amino acid transmembrane transporter activity	1	molecular_function	EVM0002099;EVM0002019
GO:0016567	protein ubiquitination	1	biological_process	EVM0007772;EVM0024588;EVM0012147;EVM0011144;EVM0020257;EVM0021829;EVM0017482
GO:0031323	regulation of cellular metabolic process	1	biological_process	EVM0003043;EVM0004495;EVM0021741;EVM0006174;EVM0005040;EVM0012023;EVM0010611;EVM0019722;EVM0005850;EVM0008304;EVM0001258;EVM0017661;EVM0020059;EVM0015392;EVM0007069;EVM0003950;EVM0021530;EVM0020029;EVM0022128;EVM0018311;EVM0022797;EVM0021138;EVM0014204;EVM0001848;EVM0008398;EVM0000626;EVM0008718;EVM0023104;EVM0002977;EVM0012387;EVM0005716;EVM0012697;EVM0008742;EVM0020810;EVM0022257;EVM0020172;EVM…
GO:0060255	regulation of macromolecule metabolic process	1	biological_process	EVM0003043;EVM0004495;EVM0021741;EVM0006174;EVM0005040;EVM0012023;EVM0010611;EVM0019722;EVM0005850;EVM0008304;EVM0001258;EVM0017661;EVM0020059;EVM0015392;EVM0007069;EVM0003950;EVM0021530;EVM0020029;EVM0022128;EVM0018311;EVM0022797;EVM0021138;EVM0014204;EVM0001848;EVM0008398;EVM0000626;EVM0008718;EVM0023104;EVM0002977;EVM0012387;EVM0005716;EVM0012697;EVM0008742;EVM0020810;EVM0022257;EVM0020172;EVM…
GO:0004620	phospholipase activity	1	molecular_function	EVM0020169;EVM0018312;EVM0005278
GO:0010468	regulation of gene expression	1	biological_process	EVM0003043;EVM0004495;EVM0021741;EVM0006174;EVM0005040;EVM0012023;EVM0010611;EVM0019722;EVM0005850;EVM0008304;EVM0001258;EVM0020059;EVM0015392;EVM0007069;EVM0003950;EVM0020029;EVM0022128;EVM0018311;EVM0022797;EVM0021138;EVM0014204;EVM0001848;EVM0008398;EVM0000626;EVM0008718;EVM0023104;EVM0002977;EVM0012387;EVM0005716;EVM0012697;EVM0008742;EVM0020810;EVM0022257;EVM0020172;EVM0006148;EVM0023138;EVM…
GO:0009723	response to ethylene	1	biological_process	EVM0001258;EVM0018311;EVM0022797;EVM0014204;EVM0012697;EVM0020172
GO:0004564	beta-fructofuranosidase activity	1	molecular_function	EVM0006730;EVM0013639
GO:0015294	solute:cation symporter activity	1	molecular_function	EVM0021751;EVM0022157
GO:0015804	neutral amino acid transport	1	biological_process	EVM0002099;EVM0002019
GO:0015103	inorganic anion transmembrane transporter activity	1	molecular_function	EVM0017558;EVM0010169;EVM0020708;EVM0009021
GO:0015075	ion transmembrane transporter activity	1	molecular_function	EVM0016487;EVM0002099;EVM0015096;EVM0021751;EVM0017558;EVM0022157;EVM0010169;EVM0000171;EVM0002019;EVM0020708;EVM0009021
GO:0070647	protein modification by small protein conjugation or removal	1	biological_process	EVM0007772;EVM0024588;EVM0012147;EVM0011144;EVM0020257;EVM0021829;EVM0011976;EVM0017482
GO:0097306	cellular response to alcohol	1	biological_process	EVM0010829;EVM0023069;EVM0023117;EVM0008295;EVM0012387;EVM0012105
GO:0034220	ion transmembrane transport	1	biological_process	EVM0016487;EVM0002099;EVM0015096;EVM0021751;EVM0017558;EVM0022157;EVM0010169;EVM0000171;EVM0002019;EVM0020708;EVM0009021
GO:0003333	amino acid transmembrane transport	1	biological_process	EVM0002099;EVM0000171;EVM0002019
GO:0015171	amino acid transmembrane transporter activity	1	molecular_function	EVM0002099;EVM0000171;EVM0002019
GO:0015293	symporter activity	1	molecular_function	EVM0021751;EVM0022157
GO:0008194	UDP-glycosyltransferase activity	1	molecular_function	EVM0008050;EVM0010139;EVM0016858;EVM0020761;EVM0003779;EVM0002664;EVM0023040
GO:0016620	oxidoreductase activity, acting on the aldehyde or oxo group of donors, NAD or NADP as acceptor	1	molecular_function	EVM0011746;EVM0021849;EVM0021530
GO:0008509	anion transmembrane transporter activity	1	molecular_function	EVM0002099;EVM0017558;EVM0010169;EVM0000171;EVM0002019;EVM0020708;EVM0009021
GO:0009267	cellular response to starvation	1	biological_process	EVM0004495;EVM0020169;EVM0010169;EVM0006405;EVM0009021
GO:1901681	sulfur compound binding	1	molecular_function	EVM0020757;EVM0001120;EVM0016093
GO:0032446	protein modification by small protein conjugation	1	biological_process	EVM0007772;EVM0024588;EVM0012147;EVM0011144;EVM0020257;EVM0021829;EVM0017482
GO:0008081	phosphoric diester hydrolase activity	1	molecular_function	EVM0020169;EVM0005278
GO:0006040	amino sugar metabolic process	1	biological_process	EVM0004016;EVM0005659
GO:0048585	negative regulation of response to stimulus	1	biological_process	EVM0012023;EVM0008414;EVM0021530;EVM0020029;EVM0008295;EVM0008398
GO:0005982	starch metabolic process	1	biological_process	EVM0016858;EVM0001078;EVM0005101
GO:0016903	oxidoreductase activity, acting on the aldehyde or oxo group of donors	1	molecular_function	EVM0011746;EVM0021849;EVM0021530
GO:0042277	peptide binding	1	molecular_function	EVM0020757;EVM0001120;EVM0016093
GO:0006714	sesquiterpenoid metabolic process	1	biological_process	EVM0013516;EVM0003666;EVM0020631
GO:0051707	response to other organism	1	biological_process	EVM0021741;EVM0002099;EVM0008304;EVM0013516;EVM0002102;EVM0012660;EVM0015096;EVM0015392;EVM0003779;EVM0003572;EVM0023069;EVM0021530;EVM0020029;EVM0003461;EVM0014204;EVM0000219;EVM0012387;EVM0005659;EVM0020223;EVM0012283;EVM0020172;EVM0017482
GO:0043207	response to external biotic stimulus	1	biological_process	EVM0021741;EVM0002099;EVM0008304;EVM0013516;EVM0002102;EVM0012660;EVM0015096;EVM0015392;EVM0003779;EVM0003572;EVM0023069;EVM0021530;EVM0020029;EVM0003461;EVM0014204;EVM0000219;EVM0012387;EVM0005659;EVM0020223;EVM0012283;EVM0020172;EVM0017482
GO:0042578	phosphoric ester hydrolase activity	1	molecular_function	EVM0020169;EVM0008414;EVM0023069;EVM0008295;EVM0005278;EVM0012105
GO:0009607	response to biotic stimulus	1	biological_process	EVM0021741;EVM0002099;EVM0008304;EVM0013516;EVM0002102;EVM0012660;EVM0015096;EVM0015392;EVM0003779;EVM0003572;EVM0023069;EVM0021530;EVM0020029;EVM0003461;EVM0014204;EVM0000219;EVM0012387;EVM0005659;EVM0020223;EVM0012283;EVM0020172;EVM0017482
GO:0007623	circadian rhythm	1	biological_process	EVM0005040;EVM0020059;EVM0013639;EVM0022797
GO:0048511	rhythmic process	1	biological_process	EVM0005040;EVM0020059;EVM0013639;EVM0022797
GO:0050794	regulation of cellular process	1	biological_process	EVM0003043;EVM0004495;EVM0021741;EVM0006174;EVM0010829;EVM0005040;EVM0012023;EVM0010611;EVM0008414;EVM0019722;EVM0005850;EVM0008304;EVM0001258;EVM0017661;EVM0020059;EVM0015096;EVM0015392;EVM0007069;EVM0023069;EVM0023117;EVM0003950;EVM0021530;EVM0020029;EVM0022128;EVM0024021;EVM0018311;EVM0008295;EVM0022797;EVM0021138;EVM0014270;EVM0014204;EVM0001848;EVM0008398;EVM0000626;EVM0008718;EVM0023104;EVM…
GO:0071396	cellular response to lipid	1	biological_process	EVM0010829;EVM0023069;EVM0023117;EVM0008295;EVM0000626;EVM0012387;EVM0012105
GO:0018105	peptidyl-serine phosphorylation	1	biological_process	EVM0024327
GO:0080160	selenate transport	1	biological_process	EVM0010169
GO:0030466	chromatin silencing at silent mating-type cassette	1	biological_process	EVM0023138
GO:0047251	thiohydroximate beta-D-glucosyltransferase activity	1	molecular_function	EVM0003779
GO:0035404	histone-serine phosphorylation	1	biological_process	EVM0024327
GO:0047513	1,2-alpha-L-fucosidase activity	1	molecular_function	EVM0013318
GO:1901072	glucosamine-containing compound catabolic process	1	biological_process	EVM0004016
GO:0005351	sugar:proton symporter activity	1	molecular_function	EVM0022157
GO:0004560	alpha-L-fucosidase activity	1	molecular_function	EVM0013318
GO:0006554	lysine catabolic process	1	biological_process	EVM0012773
GO:0050302	indole-3-acetaldehyde oxidase activity	1	molecular_function	EVM0021849
GO:0019779	Atg8 activating enzyme activity	1	molecular_function	EVM0024464
GO:0052642	lysophosphatidic acid phosphatase activity	1	molecular_function	EVM0020169
GO:0004326	tetrahydrofolylpolyglutamate synthase activity	1	molecular_function	EVM0001779
GO:0003838	sterol 24-C-methyltransferase activity	1	molecular_function	EVM0017661
GO:0046901	tetrahydrofolylpolyglutamate biosynthetic process	1	biological_process	EVM0001779
GO:0031314	extrinsic component of mitochondrial inner membrane	1	cellular_component	EVM0023438
GO:0004352	glutamate dehydrogenase (NAD+) activity	1	molecular_function	EVM0019723
GO:0018479	benzaldehyde dehydrogenase (NAD+) activity	1	molecular_function	EVM0021849
GO:0046348	amino sugar catabolic process	1	biological_process	EVM0004016
GO:0035174	histone serine kinase activity	1	molecular_function	EVM0024327
GO:0035175	histone kinase activity (H3-S10 specific)	1	molecular_function	EVM0024327
GO:0047130	saccharopine dehydrogenase (NADP+, L-lysine-forming) activity	1	molecular_function	EVM0012773
GO:0046440	L-lysine metabolic process	1	biological_process	EVM0012773
GO:0016231	beta-N-acetylglucosaminidase activity	1	molecular_function	EVM0005659
GO:0005402	cation:sugar symporter activity	1	molecular_function	EVM0022157
GO:0004753	saccharopine dehydrogenase activity	1	molecular_function	EVM0012773
GO:0019477	L-lysine catabolic process	1	biological_process	EVM0012773
GO:0018209	peptidyl-serine modification	1	biological_process	EVM0024327
GO:0018488	aryl-aldehyde oxidase activity	1	molecular_function	EVM0021849
GO:0006022	aminoglycan metabolic process	1	biological_process	EVM0004016
GO:0010438	cellular response to sulfur starvation	1	biological_process	EVM0006405
GO:0006792	regulation of sulfur utilization	1	biological_process	EVM0006405
GO:0043987	histone H3-S10 phosphorylation	1	biological_process	EVM0024327
GO:0071949	FAD binding	1	molecular_function	EVM0021849
GO:0015928	fucosidase activity	1	molecular_function	EVM0013318
GO:0019786	Atg8-specific protease activity	1	molecular_function	EVM0024464
GO:0048578	positive regulation of long-day photoperiodism, flowering	1	biological_process	EVM0020059
GO:0046164	alcohol catabolic process	1	biological_process	EVM0013516;EVM0021530
GO:0019783	ubiquitin-like protein-specific protease activity	1	molecular_function	EVM0024464;EVM0011976
GO:0033218	amide binding	1	molecular_function	EVM0020757;EVM0001120;EVM0016093
GO:0009753	response to jasmonic acid	1	biological_process	EVM0003043;EVM0004016;EVM0001258;EVM0022797;EVM0014204;EVM0012697;EVM0020172
GO:0015698	inorganic anion transport	1	biological_process	EVM0017558;EVM0010169;EVM0020708;EVM0009021
GO:0031669	cellular response to nutrient levels	1	biological_process	EVM0004495;EVM0020169;EVM0010169;EVM0006405;EVM0009021
GO:0042594	response to starvation	1	biological_process	EVM0004495;EVM0020169;EVM0010169;EVM0006405;EVM0009021
GO:0010029	regulation of seed germination	1	biological_process	EVM0024588;EVM0010829;EVM0013639
GO:0006811	ion transport	1	biological_process	EVM0016487;EVM0002099;EVM0015096;EVM0021751;EVM0022833;EVM0017558;EVM0022157;EVM0010169;EVM0000171;EVM0002019;EVM0020708;EVM0009021
GO:0009968	negative regulation of signal transduction	1	biological_process	EVM0008414;EVM0021530;EVM0008295;EVM0008398
GO:0023057	negative regulation of signaling	1	biological_process	EVM0008414;EVM0021530;EVM0008295;EVM0008398
GO:0010648	negative regulation of cell communication	1	biological_process	EVM0008414;EVM0021530;EVM0008295;EVM0008398
GO:0051554	flavonol metabolic process	1	biological_process	EVM0008050;EVM0010139;EVM0002664
GO:0051555	flavonol biosynthetic process	1	biological_process	EVM0008050;EVM0010139;EVM0002664
GO:1900140	regulation of seedling development	1	biological_process	EVM0024588;EVM0010829;EVM0013639
GO:1901616	organic hydroxy compound catabolic process	1	biological_process	EVM0013516;EVM0021530

## Sheet: ABA  24h
id	description	p_fdr	namespace	genes_in_study
GO:0005747	mitochondrial respiratory chain complex I	0	cellular_component	EVM0001346;EVM0014036;EVM0017324;EVM0000977;EVM0019068;EVM0003314;EVM0002101;EVM0011856;EVM0020406;EVM0004692;EVM0018556;EVM0018552;EVM0012880;EVM0020238;EVM0021739
GO:0030964	NADH dehydrogenase complex	0	cellular_component	EVM0001346;EVM0014036;EVM0017324;EVM0000977;EVM0019068;EVM0003314;EVM0002101;EVM0011856;EVM0020406;EVM0004692;EVM0018556;EVM0018552;EVM0012880;EVM0020238;EVM0021739
GO:0045271	respiratory chain complex I	0	cellular_component	EVM0001346;EVM0014036;EVM0017324;EVM0000977;EVM0019068;EVM0003314;EVM0002101;EVM0011856;EVM0020406;EVM0004692;EVM0018556;EVM0018552;EVM0012880;EVM0020238;EVM0021739
GO:0098798	mitochondrial protein complex	0	cellular_component	EVM0001346;EVM0014036;EVM0017324;EVM0000977;EVM0005776;EVM0024668;EVM0019068;EVM0003314;EVM0002101;EVM0011856;EVM0014981;EVM0020107;EVM0020406;EVM0000520;EVM0004692;EVM0014695;EVM0017543;EVM0018556;EVM0018552;EVM0012880;EVM0020238;EVM0021739;EVM0020779
GO:0005746	mitochondrial respiratory chain	0	cellular_component	EVM0001346;EVM0014036;EVM0017324;EVM0000977;EVM0024668;EVM0019068;EVM0003314;EVM0002101;EVM0011856;EVM0020107;EVM0020406;EVM0000520;EVM0004692;EVM0017543;EVM0018556;EVM0018552;EVM0012880;EVM0020238;EVM0021739
GO:0044455	mitochondrial membrane part	0	cellular_component	EVM0001346;EVM0014036;EVM0017324;EVM0000977;EVM0005776;EVM0024668;EVM0019068;EVM0003314;EVM0002101;EVM0011856;EVM0014981;EVM0020107;EVM0020406;EVM0000520;EVM0004692;EVM0014695;EVM0017543;EVM0018556;EVM0018552;EVM0012880;EVM0020238;EVM0021739;EVM0020779
GO:0098803	respiratory chain complex	0	cellular_component	EVM0001346;EVM0014036;EVM0017324;EVM0000977;EVM0024668;EVM0019068;EVM0003314;EVM0002101;EVM0011856;EVM0020107;EVM0020406;EVM0000520;EVM0004692;EVM0017543;EVM0018556;EVM0018552;EVM0012880;EVM0020238;EVM0021739
GO:0070469	respiratory chain	0.002	cellular_component	EVM0001346;EVM0014036;EVM0017324;EVM0000977;EVM0024668;EVM0019068;EVM0003314;EVM0002101;EVM0011856;EVM0020107;EVM0020406;EVM0000520;EVM0004692;EVM0017543;EVM0018556;EVM0018552;EVM0012880;EVM0020238;EVM0021739
GO:0005743	mitochondrial inner membrane	0.002	cellular_component	EVM0001346;EVM0012027;EVM0014036;EVM0017713;EVM0017324;EVM0023148;EVM0000977;EVM0005776;EVM0024668;EVM0019068;EVM0003314;EVM0002101;EVM0011856;EVM0014981;EVM0020107;EVM0020406;EVM0000520;EVM0004692;EVM0014695;EVM0017543;EVM0018556;EVM0018552;EVM0012880;EVM0020238;EVM0021739;EVM0020779
GO:1902494	catalytic complex	0.002	cellular_component	EVM0001346;EVM0001534;EVM0013249;EVM0014036;EVM0007732;EVM0017324;EVM0000977;EVM0024668;EVM0019068;EVM0022715;EVM0003314;EVM0002101;EVM0011856;EVM0006862;EVM0009006;EVM0008075;EVM0020107;EVM0020406;EVM0000520;EVM0004692;EVM0017638;EVM0017543;EVM0015823;EVM0018556;EVM0018552;EVM0012880;EVM0020238;EVM0021739;EVM0018120
GO:0098796	membrane protein complex	0.002	cellular_component	EVM0001346;EVM0014534;EVM0014036;EVM0007732;EVM0017324;EVM0000977;EVM0005776;EVM0024668;EVM0019068;EVM0003314;EVM0002101;EVM0011856;EVM0014981;EVM0020107;EVM0020406;EVM0008714;EVM0012943;EVM0000520;EVM0004692;EVM0017638;EVM0014695;EVM0016019;EVM0017543;EVM0014940;EVM0018634;EVM0015290;EVM0023219;EVM0018556;EVM0018552;EVM0012880;EVM0011789;EVM0020238;EVM0021739;EVM0020779;EVM0008868
GO:0005740	mitochondrial envelope	0.002	cellular_component	EVM0001346;EVM0012027;EVM0019836;EVM0014036;EVM0019758;EVM0017713;EVM0017324;EVM0023148;EVM0000977;EVM0005776;EVM0024668;EVM0019068;EVM0003314;EVM0002101;EVM0011856;EVM0014981;EVM0006838;EVM0020107;EVM0020406;EVM0000520;EVM0004692;EVM0014695;EVM0014041;EVM0017543;EVM0018556;EVM0018552;EVM0012880;EVM0020238;EVM0021739;EVM0020779
GO:0019866	organelle inner membrane	0.008	cellular_component	EVM0001346;EVM0012027;EVM0014036;EVM0017713;EVM0017324;EVM0023148;EVM0000977;EVM0005776;EVM0024668;EVM0019068;EVM0003314;EVM0002101;EVM0011856;EVM0014981;EVM0020107;EVM0020406;EVM0000520;EVM0004692;EVM0014695;EVM0017543;EVM0018556;EVM0018552;EVM0012880;EVM0020238;EVM0022163;EVM0021739;EVM0020779;EVM0009803
GO:0098800	inner mitochondrial membrane protein complex	0.008	cellular_component	EVM0001346;EVM0014036;EVM0017324;EVM0000977;EVM0005776;EVM0024668;EVM0019068;EVM0003314;EVM0002101;EVM0011856;EVM0014981;EVM0020107;EVM0020406;EVM0000520;EVM0004692;EVM0014695;EVM0017543;EVM0018556;EVM0018552;EVM0012880;EVM0020238;EVM0021739;EVM0020779
GO:0044429	mitochondrial part	0.008	cellular_component	EVM0011327;EVM0001346;EVM0012027;EVM0019836;EVM0014036;EVM0019758;EVM0017713;EVM0017324;EVM0023148;EVM0000977;EVM0005776;EVM0024668;EVM0019068;EVM0003314;EVM0002101;EVM0011856;EVM0014981;EVM0010154;EVM0006838;EVM0020107;EVM0020406;EVM0000520;EVM0004692;EVM0014695;EVM0014041;EVM0017543;EVM0018556;EVM0018552;EVM0012880;EVM0020238;EVM0021739;EVM0020779
GO:0044436	thylakoid part	0.008	cellular_component	EVM0024511;EVM0017271;EVM0010592;EVM0003469;EVM0010462;EVM0009865;EVM0022044;EVM0000854;EVM0014245;EVM0013214;EVM0000560;EVM0001560;EVM0017170;EVM0002162;EVM0004474;EVM0004313;EVM0006390;EVM0012943;EVM0012827;EVM0011864;EVM0017638;EVM0016019;EVM0018974;EVM0014397;EVM0023219;EVM0003152;EVM0011789;EVM0022163;EVM0020779;EVM0003907;EVM0009803
GO:1990204	oxidoreductase complex	0.008	cellular_component	EVM0001346;EVM0014036;EVM0017324;EVM0000977;EVM0024668;EVM0019068;EVM0003314;EVM0002101;EVM0011856;EVM0020107;EVM0020406;EVM0000520;EVM0004692;EVM0017638;EVM0017543;EVM0018556;EVM0018552;EVM0012880;EVM0020238;EVM0021739
GO:0031966	mitochondrial membrane	0.008	cellular_component	EVM0001346;EVM0012027;EVM0014036;EVM0019758;EVM0017713;EVM0017324;EVM0023148;EVM0000977;EVM0005776;EVM0024668;EVM0019068;EVM0003314;EVM0002101;EVM0011856;EVM0014981;EVM0006838;EVM0020107;EVM0020406;EVM0000520;EVM0004692;EVM0014695;EVM0014041;EVM0017543;EVM0018556;EVM0018552;EVM0012880;EVM0020238;EVM0021739;EVM0020779
GO:0016469	proton-transporting two-sector ATPase complex	0.008	cellular_component	EVM0005776;EVM0014981;EVM0008714;EVM0000520;EVM0014695;EVM0014940;EVM0018634;EVM0020779
GO:0042651	thylakoid membrane	0.008	cellular_component	EVM0024511;EVM0017271;EVM0010592;EVM0003469;EVM0010462;EVM0009865;EVM0022044;EVM0000854;EVM0014245;EVM0013214;EVM0000560;EVM0001560;EVM0017170;EVM0002162;EVM0004474;EVM0004313;EVM0012943;EVM0012827;EVM0011864;EVM0017638;EVM0016019;EVM0018974;EVM0014397;EVM0023219;EVM0003152;EVM0011789;EVM0022163;EVM0020779;EVM0003907;EVM0009803
GO:0034357	photosynthetic membrane	0.008	cellular_component	EVM0024511;EVM0017271;EVM0010592;EVM0003469;EVM0010462;EVM0009865;EVM0022044;EVM0000854;EVM0014245;EVM0013214;EVM0000560;EVM0001560;EVM0017170;EVM0002162;EVM0004474;EVM0004313;EVM0012943;EVM0012827;EVM0011864;EVM0017638;EVM0016019;EVM0018974;EVM0014397;EVM0023219;EVM0003152;EVM0011789;EVM0022163;EVM0020779;EVM0003907;EVM0009803
GO:0043234	protein complex	0.008	cellular_component	EVM0024267;EVM0001346;EVM0001534;EVM0013249;EVM0014534;EVM0014036;EVM0007732;EVM0017324;EVM0000977;EVM0005376;EVM0005776;EVM0024668;EVM0019068;EVM0019102;EVM0012527;EVM0022715;EVM0008487;EVM0003314;EVM0002101;EVM0011856;EVM0006862;EVM0014981;EVM0009006;EVM0008075;EVM0020107;EVM0020406;EVM0008714;EVM0012943;EVM0000520;EVM0004692;EVM0017638;EVM0014695;EVM0016019;EVM0017543;EVM0015747;EVM0014940;EVM…
GO:0009535	chloroplast thylakoid membrane	0.01	cellular_component	EVM0024511;EVM0017271;EVM0010592;EVM0010462;EVM0009865;EVM0022044;EVM0000854;EVM0014245;EVM0013214;EVM0000560;EVM0001560;EVM0002162;EVM0004474;EVM0004313;EVM0012943;EVM0012827;EVM0011864;EVM0017638;EVM0018974;EVM0014397;EVM0023219;EVM0003152;EVM0011789;EVM0022163;EVM0020779;EVM0003907;EVM0009803
GO:0055035	plastid thylakoid membrane	0.01	cellular_component	EVM0024511;EVM0017271;EVM0010592;EVM0010462;EVM0009865;EVM0022044;EVM0000854;EVM0014245;EVM0013214;EVM0000560;EVM0001560;EVM0002162;EVM0004474;EVM0004313;EVM0012943;EVM0012827;EVM0011864;EVM0017638;EVM0018974;EVM0014397;EVM0023219;EVM0003152;EVM0011789;EVM0022163;EVM0020779;EVM0003907;EVM0009803
GO:0032991	macromolecular complex	0.01	cellular_component	EVM0024267;EVM0009053;EVM0001346;EVM0014704;EVM0001534;EVM0013249;EVM0002998;EVM0014534;EVM0014036;EVM0007732;EVM0002350;EVM0017718;EVM0017324;EVM0004176;EVM0000977;EVM0005376;EVM0005776;EVM0024668;EVM0019068;EVM0019102;EVM0012527;EVM0022715;EVM0008487;EVM0003314;EVM0002101;EVM0011856;EVM0006862;EVM0014981;EVM0009006;EVM0000816;EVM0008075;EVM0022792;EVM0009322;EVM0020107;EVM0005449;EVM0020406;EVM…
GO:0009507	chloroplast	0.01	cellular_component	EVM0016003;EVM0024267;EVM0015555;EVM0024511;EVM0017271;EVM0010592;EVM0003469;EVM0002998;EVM0002146;EVM0004603;EVM0001120;EVM0004956;EVM0019836;EVM0014534;EVM0005782;EVM0018402;EVM0003649;EVM0019687;EVM0003733;EVM0017718;EVM0010462;EVM0002512;EVM0018004;EVM0009865;EVM0007365;EVM0020050;EVM0005510;EVM0001985;EVM0004183;EVM0022044;EVM0008487;EVM0000854;EVM0002220;EVM0012719;EVM0024160;EVM0017183;EVM…
GO:0009536	plastid	0.01	cellular_component	EVM0012858;EVM0016003;EVM0024267;EVM0015555;EVM0024511;EVM0017271;EVM0010592;EVM0003469;EVM0002998;EVM0002146;EVM0004603;EVM0001120;EVM0004956;EVM0019836;EVM0014534;EVM0005782;EVM0018402;EVM0003649;EVM0019687;EVM0003733;EVM0017718;EVM0010462;EVM0002512;EVM0018004;EVM0009865;EVM0007365;EVM0020050;EVM0005776;EVM0005510;EVM0001985;EVM0004183;EVM0022044;EVM0008487;EVM0000854;EVM0002220;EVM0012719;EVM…
GO:0031975	envelope	0.01	cellular_component	EVM0001346;EVM0002146;EVM0012027;EVM0019836;EVM0014534;EVM0014036;EVM0003733;EVM0019758;EVM0017713;EVM0017324;EVM0023148;EVM0000977;EVM0005776;EVM0004183;EVM0024668;EVM0019068;EVM0000854;EVM0002220;EVM0012719;EVM0003314;EVM0002101;EVM0011856;EVM0014981;EVM0002946;EVM0009355;EVM0023010;EVM0001560;EVM0006838;EVM0020107;EVM0009194;EVM0001825;EVM0020406;EVM0000520;EVM0004692;EVM0014695;EVM0014041;EVM…
GO:0031967	organelle envelope	0.01	cellular_component	EVM0001346;EVM0002146;EVM0012027;EVM0019836;EVM0014534;EVM0014036;EVM0003733;EVM0019758;EVM0017713;EVM0017324;EVM0023148;EVM0000977;EVM0005776;EVM0004183;EVM0024668;EVM0019068;EVM0000854;EVM0002220;EVM0012719;EVM0003314;EVM0002101;EVM0011856;EVM0014981;EVM0002946;EVM0009355;EVM0023010;EVM0001560;EVM0006838;EVM0020107;EVM0009194;EVM0001825;EVM0020406;EVM0000520;EVM0004692;EVM0014695;EVM0014041;EVM…
GO:0044446	intracellular organelle part	0.01	cellular_component	EVM0011327;EVM0016487;EVM0024267;EVM0009977;EVM0001346;EVM0024511;EVM0014704;EVM0017271;EVM0001534;EVM0010592;EVM0013249;EVM0003469;EVM0002998;EVM0002146;EVM0012027;EVM0004603;EVM0001120;EVM0019836;EVM0014534;EVM0014036;EVM0007732;EVM0016520;EVM0016914;EVM0010497;EVM0002350;EVM0003733;EVM0012462;EVM0017718;EVM0019758;EVM0010462;EVM0017713;EVM0017324;EVM0023148;EVM0003985;EVM0018004;EVM0004176;EVM…
GO:0044422	organelle part	0.01	cellular_component	EVM0011327;EVM0016487;EVM0024267;EVM0009977;EVM0001346;EVM0024511;EVM0014704;EVM0017271;EVM0001534;EVM0010592;EVM0013249;EVM0003469;EVM0002998;EVM0002146;EVM0012027;EVM0004603;EVM0001120;EVM0019836;EVM0014534;EVM0014036;EVM0007732;EVM0016520;EVM0016914;EVM0010497;EVM0002350;EVM0003733;EVM0012462;EVM0017718;EVM0019758;EVM0010462;EVM0017713;EVM0017324;EVM0023148;EVM0003985;EVM0018004;EVM0004176;EVM…
GO:0044434	chloroplast part	0.01	cellular_component	EVM0024511;EVM0017271;EVM0010592;EVM0003469;EVM0002146;EVM0004603;EVM0001120;EVM0014534;EVM0003733;EVM0010462;EVM0018004;EVM0009865;EVM0007365;EVM0004183;EVM0022044;EVM0000854;EVM0002220;EVM0012719;EVM0024160;EVM0011856;EVM0014245;EVM0022556;EVM0017514;EVM0013214;EVM0002946;EVM0009355;EVM0000560;EVM0023010;EVM0001560;EVM0002162;EVM0004474;EVM0004313;EVM0009194;EVM0004275;EVM0006390;EVM0001825;EVM…
GO:0009579	thylakoid	0.01	cellular_component	EVM0024511;EVM0017271;EVM0010592;EVM0003469;EVM0010462;EVM0009865;EVM0022044;EVM0000854;EVM0024160;EVM0014245;EVM0013214;EVM0000560;EVM0023010;EVM0001560;EVM0017170;EVM0002162;EVM0004474;EVM0004313;EVM0006390;EVM0012943;EVM0012827;EVM0011864;EVM0017638;EVM0016019;EVM0018974;EVM0014397;EVM0023219;EVM0003152;EVM0011789;EVM0022163;EVM0022503;EVM0020779;EVM0003907;EVM0009803
GO:0005622	intracellular	0.012	cellular_component	EVM0011327;EVM0016487;EVM0012858;EVM0016003;EVM0024267;EVM0005556;EVM0009977;EVM0009053;EVM0013623;EVM0015555;EVM0001346;EVM0024511;EVM0007078;EVM0014704;EVM0017274;EVM0017271;EVM0017376;EVM0001534;EVM0020468;EVM0013022;EVM0010592;EVM0013249;EVM0003469;EVM0002647;EVM0008839;EVM0002998;EVM0021202;EVM0023774;EVM0002146;EVM0012027;EVM0020081;EVM0004603;EVM0001120;EVM0004956;EVM0018559;EVM0019836;EVM…
GO:0044424	intracellular part	0.012	cellular_component	EVM0011327;EVM0016487;EVM0012858;EVM0016003;EVM0024267;EVM0005556;EVM0009977;EVM0009053;EVM0013623;EVM0015555;EVM0001346;EVM0024511;EVM0007078;EVM0014704;EVM0017274;EVM0017271;EVM0017376;EVM0001534;EVM0020468;EVM0013022;EVM0010592;EVM0013249;EVM0003469;EVM0002647;EVM0008839;EVM0002998;EVM0021202;EVM0023774;EVM0002146;EVM0012027;EVM0020081;EVM0004603;EVM0001120;EVM0004956;EVM0018559;EVM0019836;EVM…
GO:0044444	cytoplasmic part	0.012	cellular_component	EVM0011327;EVM0016487;EVM0012858;EVM0016003;EVM0024267;EVM0009053;EVM0013623;EVM0015555;EVM0001346;EVM0024511;EVM0007078;EVM0014704;EVM0017274;EVM0017271;EVM0017376;EVM0001534;EVM0020468;EVM0013022;EVM0010592;EVM0003469;EVM0002998;EVM0021202;EVM0023774;EVM0002146;EVM0012027;EVM0020081;EVM0004603;EVM0001120;EVM0004956;EVM0019836;EVM0014534;EVM0008466;EVM0005782;EVM0018402;EVM0015912;EVM0014036;EVM…
GO:0005737	cytoplasm	0.012	cellular_component	EVM0011327;EVM0016487;EVM0012858;EVM0016003;EVM0024267;EVM0009977;EVM0009053;EVM0013623;EVM0015555;EVM0001346;EVM0024511;EVM0007078;EVM0014704;EVM0017274;EVM0017271;EVM0017376;EVM0001534;EVM0020468;EVM0013022;EVM0010592;EVM0003469;EVM0008839;EVM0002998;EVM0021202;EVM0023774;EVM0002146;EVM0012027;EVM0020081;EVM0004603;EVM0001120;EVM0004956;EVM0019836;EVM0014534;EVM0008466;EVM0005782;EVM0018402;EVM…
GO:0044435	plastid part	0.012	cellular_component	EVM0024511;EVM0017271;EVM0010592;EVM0003469;EVM0002146;EVM0004603;EVM0001120;EVM0014534;EVM0003733;EVM0010462;EVM0018004;EVM0009865;EVM0007365;EVM0004183;EVM0022044;EVM0000854;EVM0002220;EVM0012719;EVM0024160;EVM0011856;EVM0014245;EVM0022556;EVM0017514;EVM0013214;EVM0002946;EVM0009355;EVM0000560;EVM0023010;EVM0001560;EVM0002162;EVM0004474;EVM0004313;EVM0009194;EVM0004275;EVM0006390;EVM0001825;EVM…
GO:0019684	photosynthesis, light reaction	0.012	biological_process	EVM0003469;EVM0010462;EVM0004474;EVM0004313;EVM0012943;EVM0017638;EVM0016019;EVM0014397;EVM0023219;EVM0011789
GO:0043229	intracellular organelle	0.012	cellular_component	EVM0011327;EVM0016487;EVM0012858;EVM0016003;EVM0024267;EVM0005556;EVM0009977;EVM0009053;EVM0015555;EVM0001346;EVM0024511;EVM0007078;EVM0014704;EVM0017271;EVM0017376;EVM0001534;EVM0020468;EVM0013022;EVM0010592;EVM0013249;EVM0003469;EVM0002647;EVM0002998;EVM0021202;EVM0023774;EVM0002146;EVM0012027;EVM0004603;EVM0001120;EVM0004956;EVM0018559;EVM0019836;EVM0014534;EVM0005782;EVM0018402;EVM0015912;EVM…
GO:0043226	organelle	0.014	cellular_component	EVM0011327;EVM0016487;EVM0012858;EVM0016003;EVM0024267;EVM0005556;EVM0009977;EVM0009053;EVM0015555;EVM0001346;EVM0024511;EVM0007078;EVM0014704;EVM0017271;EVM0017376;EVM0001534;EVM0020468;EVM0013022;EVM0010592;EVM0013249;EVM0003469;EVM0002647;EVM0002998;EVM0021202;EVM0023774;EVM0002146;EVM0012027;EVM0004603;EVM0001120;EVM0004956;EVM0018559;EVM0019836;EVM0014534;EVM0005782;EVM0018402;EVM0015912;EVM…
GO:0031976	plastid thylakoid	0.024	cellular_component	EVM0024511;EVM0017271;EVM0010592;EVM0003469;EVM0010462;EVM0009865;EVM0022044;EVM0000854;EVM0024160;EVM0014245;EVM0013214;EVM0000560;EVM0001560;EVM0002162;EVM0004474;EVM0004313;EVM0006390;EVM0012943;EVM0012827;EVM0011864;EVM0017638;EVM0018974;EVM0014397;EVM0023219;EVM0003152;EVM0011789;EVM0022163;EVM0020779;EVM0003907;EVM0009803
GO:0009534	chloroplast thylakoid	0.024	cellular_component	EVM0024511;EVM0017271;EVM0010592;EVM0003469;EVM0010462;EVM0009865;EVM0022044;EVM0000854;EVM0024160;EVM0014245;EVM0013214;EVM0000560;EVM0001560;EVM0002162;EVM0004474;EVM0004313;EVM0006390;EVM0012943;EVM0012827;EVM0011864;EVM0017638;EVM0018974;EVM0014397;EVM0023219;EVM0003152;EVM0011789;EVM0022163;EVM0020779;EVM0003907;EVM0009803
GO:0044425	membrane part	0.034	cellular_component	EVM0001346;EVM0018496;EVM0014534;EVM0014036;EVM0007732;EVM0016520;EVM0017324;EVM0000977;EVM0005776;EVM0001858;EVM0024668;EVM0019068;EVM0003314;EVM0002101;EVM0011856;EVM0014981;EVM0001494;EVM0020107;EVM0002029;EVM0020406;EVM0008714;EVM0012943;EVM0000520;EVM0004692;EVM0017638;EVM0014695;EVM0016019;EVM0017543;EVM0000171;EVM0014940;EVM0018634;EVM0003294;EVM0015290;EVM0023219;EVM0018556;EVM0018552;EVM…
GO:0051340	regulation of ligase activity	0.038	biological_process	EVM0009006;EVM0023829;EVM0015823;EVM0018120
GO:0051438	regulation of ubiquitin-protein transferase activity	0.038	biological_process	EVM0009006;EVM0023829;EVM0015823;EVM0018120
GO:0009853	photorespiration	0.06	biological_process	EVM0000977;EVM0019068;EVM0003314;EVM0004692;EVM0018556;EVM0012880;EVM0020238
GO:0045732	positive regulation of protein catabolic process	0.068	biological_process	EVM0009006;EVM0006531;EVM0015823;EVM0018120
GO:0045259	proton-transporting ATP synthase complex	0.08	cellular_component	EVM0005776;EVM0014981;EVM0000520;EVM0014695;EVM0020779
GO:0005753	mitochondrial proton-transporting ATP synthase complex	0.08	cellular_component	EVM0005776;EVM0014981;EVM0000520;EVM0014695;EVM0020779
GO:0005739	mitochondrion	0.092	cellular_component	EVM0011327;EVM0012858;EVM0001346;EVM0017376;EVM0023774;EVM0012027;EVM0019836;EVM0014534;EVM0015912;EVM0014036;EVM0019758;EVM0017713;EVM0017324;EVM0023148;EVM0000977;EVM0005776;EVM0024668;EVM0019068;EVM0000927;EVM0003314;EVM0002101;EVM0017183;EVM0011856;EVM0014981;EVM0024361;EVM0020758;EVM0010154;EVM0006838;EVM0003844;EVM0020107;EVM0020406;EVM0000520;EVM0004692;EVM0014695;EVM0014041;EVM0003507;EVM…
GO:0005623	cell	0.092	cellular_component	EVM0011327;EVM0016487;EVM0012858;EVM0016003;EVM0024267;EVM0005556;EVM0009977;EVM0009053;EVM0013623;EVM0015498;EVM0015555;EVM0001346;EVM0024511;EVM0007078;EVM0014704;EVM0017274;EVM0017271;EVM0017376;EVM0008635;EVM0001534;EVM0020468;EVM0013022;EVM0017073;EVM0010592;EVM0013249;EVM0003469;EVM0002647;EVM0008839;EVM0002998;EVM0002997;EVM0021202;EVM0023774;EVM0002146;EVM0012027;EVM0007988;EVM0020081;EVM…
GO:0044464	cell part	0.092	cellular_component	EVM0011327;EVM0016487;EVM0012858;EVM0016003;EVM0024267;EVM0005556;EVM0009977;EVM0009053;EVM0013623;EVM0015498;EVM0015555;EVM0001346;EVM0024511;EVM0007078;EVM0014704;EVM0017274;EVM0017271;EVM0017376;EVM0008635;EVM0001534;EVM0020468;EVM0013022;EVM0017073;EVM0010592;EVM0013249;EVM0003469;EVM0002647;EVM0008839;EVM0002998;EVM0002997;EVM0021202;EVM0023774;EVM0002146;EVM0012027;EVM0007988;EVM0020081;EVM…
GO:0022900	electron transport chain	0.094	biological_process	EVM0010462;EVM0017638;EVM0016019;EVM0014397;EVM0023219;EVM0011789;EVM0022503
GO:0009767	photosynthetic electron transport chain	0.094	biological_process	EVM0010462;EVM0017638;EVM0016019;EVM0014397;EVM0023219;EVM0011789
GO:0015979	photosynthesis	0.104	biological_process	EVM0003469;EVM0010462;EVM0004474;EVM0004313;EVM0012943;EVM0017638;EVM0016019;EVM0014397;EVM0023219;EVM0011789
GO:0009896	positive regulation of catabolic process	0.15	biological_process	EVM0009006;EVM0006531;EVM0015823;EVM0018120
GO:0009773	photosynthetic electron transport in photosystem I	0.208	biological_process	EVM0010462;EVM0016019;EVM0023219;EVM0011789
GO:0043231	intracellular membrane-bounded organelle	0.228	cellular_component	EVM0011327;EVM0016487;EVM0012858;EVM0016003;EVM0024267;EVM0005556;EVM0009977;EVM0015555;EVM0001346;EVM0024511;EVM0007078;EVM0017271;EVM0017376;EVM0001534;EVM0020468;EVM0010592;EVM0013249;EVM0003469;EVM0002998;EVM0021202;EVM0023774;EVM0002146;EVM0012027;EVM0004603;EVM0001120;EVM0004956;EVM0018559;EVM0019836;EVM0014534;EVM0005782;EVM0018402;EVM0015912;EVM0014036;EVM0003649;EVM0019687;EVM0007732;EVM…
GO:0043227	membrane-bounded organelle	0.228	cellular_component	EVM0011327;EVM0016487;EVM0012858;EVM0016003;EVM0024267;EVM0005556;EVM0009977;EVM0015555;EVM0001346;EVM0024511;EVM0007078;EVM0017271;EVM0017376;EVM0001534;EVM0020468;EVM0010592;EVM0013249;EVM0003469;EVM0002998;EVM0021202;EVM0023774;EVM0002146;EVM0012027;EVM0004603;EVM0001120;EVM0004956;EVM0018559;EVM0019836;EVM0014534;EVM0005782;EVM0018402;EVM0015912;EVM0014036;EVM0003649;EVM0019687;EVM0007732;EVM…
GO:1903320	regulation of protein modification by small protein conjugation or removal	0.294	biological_process	EVM0009006;EVM0023829;EVM0015823;EVM0018120
GO:0031396	regulation of protein ubiquitination	0.294	biological_process	EVM0009006;EVM0023829;EVM0015823;EVM0018120
GO:0051351	positive regulation of ligase activity	0.33	biological_process	EVM0009006;EVM0015823;EVM0018120
GO:0051443	positive regulation of ubiquitin-protein transferase activity	0.33	biological_process	EVM0009006;EVM0015823;EVM0018120
GO:2000058	regulation of protein ubiquitination involved in ubiquitin-dependent protein catabolic process	0.33	biological_process	EVM0009006;EVM0015823;EVM0018120
GO:2000060	positive regulation of protein ubiquitination involved in ubiquitin-dependent protein catabolic process	0.33	biological_process	EVM0009006;EVM0015823;EVM0018120
GO:0051439	regulation of ubiquitin-protein ligase activity involved in mitotic cell cycle	0.33	biological_process	EVM0009006;EVM0015823;EVM0018120
GO:0051437	positive regulation of ubiquitin-protein ligase activity involved in regulation of mitotic cell cycle transition	0.33	biological_process	EVM0009006;EVM0015823;EVM0018120
GO:1904666	regulation of ubiquitin protein ligase activity	0.33	biological_process	EVM0009006;EVM0015823;EVM0018120
GO:1904668	positive regulation of ubiquitin protein ligase activity	0.33	biological_process	EVM0009006;EVM0015823;EVM0018120
GO:0009055	electron carrier activity	0.394	molecular_function	EVM0010462;EVM0016847;EVM0017638;EVM0014397
GO:0005856	cytoskeleton	0.412	cellular_component	EVM0001534;EVM0013022;EVM0002647;EVM0009832;EVM0008289;EVM0012462;EVM0005376;EVM0019102;EVM0009006;EVM0024296;EVM0001378;EVM0015823;EVM0023182;EVM0020410;EVM0018120
GO:0031970	organelle envelope lumen	0.45	cellular_component	EVM0000977;EVM0009194;EVM0018556;EVM0021739
GO:0051493	regulation of cytoskeleton organization	0.45	biological_process	EVM0009006;EVM0024296;EVM0015823;EVM0020410
GO:1903052	positive regulation of proteolysis involved in cellular protein catabolic process	0.468	biological_process	EVM0009006;EVM0015823;EVM0018120
GO:0031145	anaphase-promoting complex-dependent catabolic process	0.468	biological_process	EVM0009006;EVM0015823;EVM0018120
GO:1903364	positive regulation of cellular protein catabolic process	0.468	biological_process	EVM0009006;EVM0015823;EVM0018120
GO:0010824	regulation of centrosome duplication	0.52	biological_process	EVM0009006;EVM0015823
GO:0046605	regulation of centrosome cycle	0.52	biological_process	EVM0009006;EVM0015823
GO:0046933	proton-transporting ATP synthase activity, rotational mechanism	0.52	molecular_function	EVM0008714;EVM0014940
GO:0006091	generation of precursor metabolites and energy	0.696	biological_process	EVM0003469;EVM0010462;EVM0004474;EVM0004313;EVM0012943;EVM0017638;EVM0016019;EVM0014397;EVM0023219;EVM0011789;EVM0022503
GO:0043094	cellular metabolic compound salvage	0.704	biological_process	EVM0000977;EVM0019068;EVM0003314;EVM0004692;EVM0018556;EVM0012880;EVM0020238
GO:0045862	positive regulation of proteolysis	0.736	biological_process	EVM0009006;EVM0015823;EVM0018120
GO:0006333	chromatin assembly or disassembly	0.766	biological_process	EVM0003985;EVM0021495;EVM0015645;EVM0011623
GO:0005875	microtubule associated complex	0.786	cellular_component	EVM0001534;EVM0009006;EVM0015823;EVM0023182;EVM0018120
GO:1903322	positive regulation of protein modification by small protein conjugation or removal	0.792	biological_process	EVM0009006;EVM0015823;EVM0018120
GO:0031331	positive regulation of cellular catabolic process	0.792	biological_process	EVM0009006;EVM0015823;EVM0018120
GO:0031398	positive regulation of protein ubiquitination	0.792	biological_process	EVM0009006;EVM0015823;EVM0018120
GO:0005575	cellular_component	0.818	cellular_component	EVM0011327;EVM0016487;EVM0012858;EVM0016003;EVM0024267;EVM0005556;EVM0009977;EVM0011432;EVM0009053;EVM0013623;EVM0015498;EVM0015555;EVM0001346;EVM0024511;EVM0007078;EVM0014704;EVM0017274;EVM0017271;EVM0017376;EVM0008635;EVM0001534;EVM0020468;EVM0013022;EVM0017073;EVM0010592;EVM0013249;EVM0003469;EVM0002647;EVM0008839;EVM0002998;EVM0002997;EVM0021202;EVM0023774;EVM0023770;EVM0018496;EVM0002146;EVM…
GO:0042176	regulation of protein catabolic process	0.82	biological_process	EVM0009006;EVM0006531;EVM0015823;EVM0018120
GO:1903050	regulation of proteolysis involved in cellular protein catabolic process	0.854	biological_process	EVM0009006;EVM0015823;EVM0018120
GO:1903362	regulation of cellular protein catabolic process	0.854	biological_process	EVM0009006;EVM0015823;EVM0018120
GO:0033522	histone H2A ubiquitination	0.882	biological_process	EVM0009006;EVM0015823
GO:0008154	actin polymerization or depolymerization	0.882	biological_process	EVM0013846;EVM0020410
GO:0035518	histone H2A monoubiquitination	0.882	biological_process	EVM0009006;EVM0015823
GO:0010390	histone monoubiquitination	0.882	biological_process	EVM0009006;EVM0015823
GO:0006878	cellular copper ion homeostasis	0.882	biological_process	EVM0006702;EVM0020712
GO:0009532	plastid stroma	0.946	cellular_component	EVM0002146;EVM0004603;EVM0001120;EVM0003733;EVM0018004;EVM0007365;EVM0004183;EVM0022044;EVM0002220;EVM0012719;EVM0022556;EVM0017514;EVM0002946;EVM0023010;EVM0001560;EVM0004275;EVM0006390;EVM0003325;EVM0006281;EVM0003801;EVM0018855;EVM0009661;EVM0006400;EVM0018974;EVM0021706;EVM0009440;EVM0023219;EVM0006382;EVM0018525;EVM0002206;EVM0024419;EVM0022503;EVM0003907;EVM0009774
GO:0031984	organelle subcompartment	0.954	cellular_component	EVM0024511;EVM0017271;EVM0010592;EVM0003469;EVM0007732;EVM0010462;EVM0009865;EVM0022044;EVM0000854;EVM0024160;EVM0014245;EVM0013214;EVM0000560;EVM0001560;EVM0002162;EVM0004474;EVM0004313;EVM0006390;EVM0012943;EVM0012827;EVM0011864;EVM0017638;EVM0018974;EVM0011834;EVM0014397;EVM0023219;EVM0015602;EVM0003152;EVM0017331;EVM0011789;EVM0022163;EVM0020779;EVM0003907;EVM0009803
GO:0070069	cytochrome complex	0.964	cellular_component	EVM0020107;EVM0000520;EVM0014397
GO:0051320	S phase	0.964	biological_process	EVM0009006;EVM0015823;EVM0018120
GO:0000084	mitotic S phase	0.964	biological_process	EVM0009006;EVM0015823;EVM0018120
GO:0005758	mitochondrial intermembrane space	0.964	cellular_component	EVM0000977;EVM0018556;EVM0021739
GO:0009570	chloroplast stroma	0.972	cellular_component	EVM0002146;EVM0004603;EVM0001120;EVM0003733;EVM0018004;EVM0007365;EVM0004183;EVM0022044;EVM0002220;EVM0012719;EVM0022556;EVM0017514;EVM0002946;EVM0023010;EVM0001560;EVM0004275;EVM0006390;EVM0003325;EVM0006281;EVM0003801;EVM0018855;EVM0009661;EVM0006400;EVM0018974;EVM0021706;EVM0009440;EVM0006382;EVM0018525;EVM0002206;EVM0024419;EVM0022503;EVM0003907;EVM0009774
GO:0010025	wax biosynthetic process	0.982	biological_process	EVM0013360;EVM0002029;EVM0003710;EVM0006364
GO:0010166	wax metabolic process	0.982	biological_process	EVM0013360;EVM0002029;EVM0003710;EVM0006364
GO:0031090	organelle membrane	0.984	cellular_component	EVM0016487;EVM0001346;EVM0002998;EVM0012027;EVM0001120;EVM0014534;EVM0014036;EVM0007732;EVM0016520;EVM0019758;EVM0017713;EVM0017324;EVM0023148;EVM0000977;EVM0005776;EVM0001858;EVM0024668;EVM0019068;EVM0013423;EVM0000927;EVM0003314;EVM0002101;EVM0011856;EVM0003358;EVM0001691;EVM0002035;EVM0014981;EVM0001494;EVM0006838;EVM0020107;EVM0002029;EVM0018544;EVM0020406;EVM0008714;EVM0000520;EVM0011864;EVM…
GO:0006513	protein monoubiquitination	0.986	biological_process	EVM0009006;EVM0015823
GO:0051352	negative regulation of ligase activity	0.986	biological_process	EVM0023829;EVM0018120
GO:0034425	etioplast envelope	0.986	cellular_component	EVM0014534;EVM0003932
GO:0051318	G1 phase	0.986	biological_process	EVM0009006;EVM0015823
GO:0034426	etioplast membrane	0.986	cellular_component	EVM0014534;EVM0003932
GO:0015991	ATP hydrolysis coupled proton transport	0.986	biological_process	EVM0008714;EVM0014940
GO:0045283	fumarate reductase complex	0.986	cellular_component	EVM0024668;EVM0017543
GO:0016574	histone ubiquitination	0.986	biological_process	EVM0009006;EVM0015823
GO:0051444	negative regulation of ubiquitin-protein transferase activity	0.986	biological_process	EVM0023829;EVM0018120
GO:0090662	ATP hydrolysis coupled transmembrane transport	0.986	biological_process	EVM0008714;EVM0014940
GO:0099131	ATP hydrolysis coupled ion transmembrane transport	0.986	biological_process	EVM0008714;EVM0014940
GO:0099132	ATP hydrolysis coupled cation transmembrane transport	0.986	biological_process	EVM0008714;EVM0014940
GO:0005749	mitochondrial respiratory chain complex II, succinate dehydrogenase complex (ubiquinone)	0.986	cellular_component	EVM0024668;EVM0017543
GO:0071484	cellular response to light intensity	0.986	biological_process	EVM0010462;EVM0006391
GO:0030527	structural constituent of chromatin	0.986	molecular_function	EVM0003985;EVM0021495
GO:0015988	energy coupled proton transmembrane transport, against electrochemical gradient	0.986	biological_process	EVM0008714;EVM0014940
GO:0045257	succinate dehydrogenase complex (ubiquinone)	0.986	cellular_component	EVM0024668;EVM0017543
GO:0000080	mitotic G1 phase	0.986	biological_process	EVM0009006;EVM0015823
GO:0006388	tRNA splicing, via endonucleolytic cleavage and ligation	0.986	biological_process	EVM0011085;EVM0017307
GO:0070647	protein modification by small protein conjugation or removal	0.998	biological_process	EVM0001636;EVM0013423;EVM0009006;EVM0008075;EVM0021854;EVM0022059;EVM0007227;EVM0015747;EVM0015823;EVM0011976;EVM0021324;EVM0018120
GO:0051298	centrosome duplication	0.998	biological_process	EVM0009006;EVM0015823;EVM0011623
GO:0007093	mitotic cell cycle checkpoint	1	biological_process	EVM0009006;EVM0001378;EVM0015823;EVM0018120
GO:0005819	spindle	1	cellular_component	EVM0005376;EVM0019102;EVM0009006;EVM0001378;EVM0015823;EVM0018120
GO:0040010	positive regulation of growth rate	1	biological_process	EVM0016142;EVM0009006;EVM0018634;EVM0015823;EVM0018120
GO:0007010	cytoskeleton organization	1	biological_process	EVM0012462;EVM0013846;EVM0005376;EVM0009006;EVM0024296;EVM0001378;EVM0015823;EVM0020410;EVM0011623
GO:1901991	negative regulation of mitotic cell cycle phase transition	1	biological_process	EVM0009006;EVM0001378;EVM0015823;EVM0018120
GO:0043228	non-membrane-bounded organelle	1	cellular_component	EVM0024267;EVM0009977;EVM0009053;EVM0014704;EVM0001534;EVM0013022;EVM0002647;EVM0002998;EVM0009832;EVM0016914;EVM0002350;EVM0008289;EVM0012462;EVM0017718;EVM0003985;EVM0004176;EVM0005376;EVM0021495;EVM0019102;EVM0003314;EVM0019160;EVM0009006;EVM0000816;EVM0022792;EVM0005449;EVM0012091;EVM0024296;EVM0015645;EVM0001378;EVM0006364;EVM0015823;EVM0000358;EVM0023219;EVM0008417;EVM0023182;EVM0006382;EVM…
GO:0043232	intracellular non-membrane-bounded organelle	1	cellular_component	EVM0024267;EVM0009977;EVM0009053;EVM0014704;EVM0001534;EVM0013022;EVM0002647;EVM0002998;EVM0009832;EVM0016914;EVM0002350;EVM0008289;EVM0012462;EVM0017718;EVM0003985;EVM0004176;EVM0005376;EVM0021495;EVM0019102;EVM0003314;EVM0019160;EVM0009006;EVM0000816;EVM0022792;EVM0005449;EVM0012091;EVM0024296;EVM0015645;EVM0001378;EVM0006364;EVM0015823;EVM0000358;EVM0023219;EVM0008417;EVM0023182;EVM0006382;EVM…
GO:0019867	outer membrane	1	cellular_component	EVM0014534;EVM0019758;EVM0011856;EVM0006838;EVM0014041;EVM0003932;EVM0000171
GO:0031968	organelle outer membrane	1	cellular_component	EVM0014534;EVM0019758;EVM0011856;EVM0006838;EVM0014041;EVM0003932;EVM0000171
GO:0040009	regulation of growth rate	1	biological_process	EVM0016142;EVM0009006;EVM0018634;EVM0015823;EVM0018120
GO:0046872	metal ion binding	1	molecular_function	EVM0006702;EVM0001346;EVM0019836;EVM0005995;EVM0023021;EVM0008487;EVM0003314;EVM0002101;EVM0014981;EVM0000789;EVM0020712;EVM0009194;EVM0018544;EVM0006391;EVM0020406;EVM0003234;EVM0020779
GO:0005507	copper ion binding	1	molecular_function	EVM0006702;EVM0019836;EVM0008487;EVM0003314;EVM0000789;EVM0020712;EVM0009194;EVM0006391;EVM0020779
GO:0043169	cation binding	1	molecular_function	EVM0006702;EVM0001346;EVM0019836;EVM0005995;EVM0023021;EVM0008487;EVM0003314;EVM0002101;EVM0014981;EVM0000789;EVM0020712;EVM0009194;EVM0018544;EVM0006391;EVM0020406;EVM0003234;EVM0020779
GO:0045930	negative regulation of mitotic cell cycle	1	biological_process	EVM0009006;EVM0001378;EVM0015823;EVM0018120
GO:0045931	positive regulation of mitotic cell cycle	1	biological_process	EVM0009006;EVM0015823
GO:0000815	ESCRT III complex	1	cellular_component	EVM0015290;EVM0008868
GO:0045281	succinate dehydrogenase complex	1	cellular_component	EVM0024668;EVM0017543
GO:0010196	nonphotochemical quenching	1	biological_process	EVM0020050;EVM0014397
GO:0055070	copper ion homeostasis	1	biological_process	EVM0006702;EVM0020712
GO:0044769	ATPase activity, coupled to transmembrane movement of ions, rotational mechanism	1	molecular_function	EVM0008714;EVM0014940
GO:0000394	RNA splicing, via endonucleolytic cleavage and ligation	1	biological_process	EVM0011085;EVM0017307
GO:0045273	respiratory chain complex II	1	cellular_component	EVM0024668;EVM0017543
GO:1990066	energy quenching	1	biological_process	EVM0020050;EVM0014397
GO:0044773	mitotic DNA damage checkpoint	1	biological_process	EVM0009006;EVM0015823;EVM0018120
GO:0044774	mitotic DNA integrity checkpoint	1	biological_process	EVM0009006;EVM0015823;EVM0018120
GO:0007346	regulation of mitotic cell cycle	1	biological_process	EVM0009006;EVM0022059;EVM0001378;EVM0015823;EVM0018120
GO:0015630	microtubule cytoskeleton	1	cellular_component	EVM0001534;EVM0012462;EVM0005376;EVM0019102;EVM0009006;EVM0001378;EVM0015823;EVM0023182;EVM0018120
GO:1901990	regulation of mitotic cell cycle phase transition	1	biological_process	EVM0009006;EVM0001378;EVM0015823;EVM0018120
GO:1903321	negative regulation of protein modification by small protein conjugation or removal	1	biological_process	EVM0023829;EVM0018120
GO:0016819	hydrolase activity, acting on acid anhydrides, in sulfonyl-containing anhydrides	1	molecular_function	EVM0021529;EVM0008988
GO:0009513	etioplast	1	cellular_component	EVM0014534;EVM0003932
GO:0015936	coenzyme A metabolic process	1	biological_process	EVM0009520;EVM0023612
GO:0015937	coenzyme A biosynthetic process	1	biological_process	EVM0009520;EVM0023612
GO:0031397	negative regulation of protein ubiquitination	1	biological_process	EVM0023829;EVM0018120
GO:0047627	adenylylsulfatase activity	1	molecular_function	EVM0021529;EVM0008988
GO:0005930	axoneme	1	cellular_component	EVM0001534;EVM0001534
GO:0040008	regulation of growth	1	biological_process	EVM0002997;EVM0016142;EVM0009006;EVM0011864;EVM0006531;EVM0018634;EVM0013532;EVM0015823;EVM0018120
GO:0051297	centrosome organization	1	biological_process	EVM0009006;EVM0015823;EVM0011623
GO:0007098	centrosome cycle	1	biological_process	EVM0009006;EVM0015823;EVM0011623
GO:0031647	regulation of protein stability	1	biological_process	EVM0010497;EVM0009006;EVM0015823
GO:0031023	microtubule organizing center organization	1	biological_process	EVM0009006;EVM0015823;EVM0011623
GO:0044430	cytoskeletal part	1	cellular_component	EVM0001534;EVM0012462;EVM0005376;EVM0019102;EVM0009006;EVM0001378;EVM0015823;EVM0023182;EVM0018120
GO:0032446	protein modification by small protein conjugation	1	biological_process	EVM0001636;EVM0013423;EVM0009006;EVM0008075;EVM0021854;EVM0022059;EVM0007227;EVM0015823;EVM0021324;EVM0018120
GO:0000075	cell cycle checkpoint	1	biological_process	EVM0009006;EVM0001378;EVM0015823;EVM0018120
GO:0043167	ion binding	1	molecular_function	EVM0006702;EVM0015555;EVM0001346;EVM0023774;EVM0001120;EVM0019836;EVM0007732;EVM0005995;EVM0023021;EVM0008487;EVM0003314;EVM0002101;EVM0002035;EVM0014981;EVM0000789;EVM0020712;EVM0009194;EVM0018544;EVM0006391;EVM0020406;EVM0006281;EVM0001378;EVM0003234;EVM0020779
GO:0030162	regulation of proteolysis	1	biological_process	EVM0009006;EVM0015823;EVM0018120
GO:0000077	DNA damage checkpoint	1	biological_process	EVM0009006;EVM0015823;EVM0018120
GO:0044843	cell cycle G1/S phase transition	1	biological_process	EVM0009006;EVM0015823;EVM0018120
GO:0000082	G1/S transition of mitotic cell cycle	1	biological_process	EVM0009006;EVM0015823;EVM0018120
GO:0005829	cytosol	1	cellular_component	EVM0013623;EVM0007078;EVM0014704;EVM0017274;EVM0013022;EVM0002998;EVM0023774;EVM0020081;EVM0001120;EVM0019836;EVM0008466;EVM0005782;EVM0007949;EVM0016914;EVM0002350;EVM0015507;EVM0017718;EVM0002512;EVM0004176;EVM0018879;EVM0007418;EVM0014541;EVM0003501;EVM0021495;EVM0003358;EVM0002035;EVM0008993;EVM0015055;EVM0009006;EVM0024623;EVM0000816;EVM0022792;EVM0021854;EVM0021134;EVM0012754;EVM0024375;EVM…
GO:1901988	negative regulation of cell cycle phase transition	1	biological_process	EVM0009006;EVM0001378;EVM0015823;EVM0018120
GO:0006461	protein complex assembly	1	biological_process	EVM0003469;EVM0017170;EVM0002162;EVM0004313;EVM0009194;EVM0015747;EVM0011478;EVM0020410
GO:0033866	nucleoside bisphosphate biosynthetic process	1	biological_process	EVM0009520;EVM0023612
GO:0033865	nucleoside bisphosphate metabolic process	1	biological_process	EVM0009520;EVM0023612
GO:0070507	regulation of microtubule cytoskeleton organization	1	biological_process	EVM0009006;EVM0015823
GO:0034030	ribonucleoside bisphosphate biosynthetic process	1	biological_process	EVM0009520;EVM0023612
GO:0033875	ribonucleoside bisphosphate metabolic process	1	biological_process	EVM0009520;EVM0023612
GO:0034032	purine nucleoside bisphosphate metabolic process	1	biological_process	EVM0009520;EVM0023612
GO:0034033	purine nucleoside bisphosphate biosynthetic process	1	biological_process	EVM0009520;EVM0023612
GO:0005488	binding	1	molecular_function	EVM0006702;EVM0015555;EVM0001346;EVM0019884;EVM0002997;EVM0023774;EVM0001120;EVM0019836;EVM0007732;EVM0005995;EVM0013846;EVM0023021;EVM0003985;EVM0005376;EVM0020882;EVM0021495;EVM0008487;EVM0003314;EVM0002101;EVM0024160;EVM0011856;EVM0002035;EVM0008993;EVM0014981;EVM0009006;EVM0000789;EVM0020712;EVM0009194;EVM0018544;EVM0023829;EVM0006391;EVM0020406;EVM0012943;EVM0011864;EVM0006531;EVM0006281;EVM…
GO:0016671	oxidoreductase activity, acting on a sulfur group of donors, disulfide as acceptor	1	molecular_function	EVM0015507;EVM0017094;EVM0015060
GO:0019005	SCF ubiquitin ligase complex	1	cellular_component	EVM0009006;EVM0008075;EVM0015823
GO:0046914	transition metal ion binding	1	molecular_function	EVM0006702;EVM0001346;EVM0019836;EVM0023021;EVM0008487;EVM0003314;EVM0014981;EVM0000789;EVM0020712;EVM0009194;EVM0006391;EVM0020406;EVM0020779
GO:0043933	macromolecular complex subunit organization	1	biological_process	EVM0003469;EVM0013846;EVM0017170;EVM0002162;EVM0004313;EVM0009194;EVM0015747;EVM0024296;EVM0015645;EVM0001378;EVM0011478;EVM0020410
GO:0070271	protein complex biogenesis	1	biological_process	EVM0003469;EVM0017170;EVM0002162;EVM0004313;EVM0009194;EVM0015747;EVM0011478;EVM0020410
GO:0015078	hydrogen ion transmembrane transporter activity	1	molecular_function	EVM0016487;EVM0008714;EVM0014940
GO:0007015	actin filament organization	1	biological_process	EVM0013846;EVM0024296;EVM0020410
GO:0031570	DNA integrity checkpoint	1	biological_process	EVM0009006;EVM0015823;EVM0018120
GO:0072593	reactive oxygen species metabolic process	1	biological_process	EVM0015055;EVM0017094;EVM0006391;EVM0002206
GO:0065003	macromolecular complex assembly	1	biological_process	EVM0003469;EVM0017170;EVM0002162;EVM0004313;EVM0009194;EVM0015747;EVM0015645;EVM0011478;EVM0020410
GO:0016567	protein ubiquitination	1	biological_process	EVM0001636;EVM0013423;EVM0009006;EVM0008075;EVM0021854;EVM0022059;EVM0007227;EVM0015823;EVM0018120
GO:0032886	regulation of microtubule-based process	1	biological_process	EVM0009006;EVM0015823
GO:0030832	regulation of actin filament length	1	biological_process	EVM0024296;EVM0020410
GO:0030833	regulation of actin filament polymerization	1	biological_process	EVM0024296;EVM0020410
GO:0000209	protein polyubiquitination	1	biological_process	EVM0022059;EVM0018120
GO:0007095	mitotic G2 DNA damage checkpoint	1	biological_process	EVM0009006;EVM0015823
GO:0044818	mitotic G2/M transition checkpoint	1	biological_process	EVM0009006;EVM0015823
GO:0010190	cytochrome b6f complex assembly	1	biological_process	EVM0017170;EVM0002162
GO:0032956	regulation of actin cytoskeleton organization	1	biological_process	EVM0024296;EVM0020410
GO:0032970	regulation of actin filament-based process	1	biological_process	EVM0024296;EVM0020410
GO:0000786	nucleosome	1	cellular_component	EVM0015645;EVM0011623
GO:0031572	G2 DNA damage checkpoint	1	biological_process	EVM0009006;EVM0015823
GO:0008064	regulation of actin polymerization or depolymerization	1	biological_process	EVM0024296;EVM0020410
GO:0009521	photosystem	1	cellular_component	EVM0017638;EVM0023219
GO:0032271	regulation of protein polymerization	1	biological_process	EVM0024296;EVM0020410
GO:0071822	protein complex subunit organization	1	biological_process	EVM0003469;EVM0013846;EVM0017170;EVM0002162;EVM0004313;EVM0009194;EVM0015747;EVM0024296;EVM0001378;EVM0011478;EVM0020410
GO:0005813	centrosome	1	cellular_component	EVM0009006;EVM0001378;EVM0015823
GO:0045927	positive regulation of growth	1	biological_process	EVM0016142;EVM0009006;EVM0018634;EVM0015823;EVM0018120
GO:0009894	regulation of catabolic process	1	biological_process	EVM0009006;EVM0006531;EVM0015823;EVM0018120
GO:1901987	regulation of cell cycle phase transition	1	biological_process	EVM0009006;EVM0001378;EVM0015823;EVM0018120
GO:0043623	cellular protein complex assembly	1	biological_process	EVM0003469;EVM0017170;EVM0002162;EVM0004313;EVM0015747;EVM0020410
GO:0006323	DNA packaging	1	biological_process	EVM0009006;EVM0015645;EVM0015823
GO:0051348	negative regulation of transferase activity	1	biological_process	EVM0023829;EVM0009661;EVM0018120
GO:0051325	interphase	1	biological_process	EVM0009006;EVM0015823;EVM0018120
GO:0051329	mitotic interphase	1	biological_process	EVM0009006;EVM0015823;EVM0018120
GO:0009707	chloroplast outer membrane	1	cellular_component	EVM0014534;EVM0011856;EVM0003932;EVM0000171
GO:0004427	inorganic diphosphatase activity	1	molecular_function	EVM0000496;EVM0011478
GO:1902600	hydrogen ion transmembrane transport	1	biological_process	EVM0008714;EVM0014940
GO:0031358	intrinsic component of chloroplast outer membrane	1	cellular_component	EVM0014534;EVM0000171
GO:0031359	integral component of chloroplast outer membrane	1	cellular_component	EVM0014534;EVM0000171
GO:0031355	integral component of plastid outer membrane	1	cellular_component	EVM0014534;EVM0000171
GO:0007219	Notch signaling pathway	1	biological_process	EVM0009006;EVM0015823
GO:0042590	antigen processing and presentation of exogenous peptide antigen via MHC class I	1	biological_process	EVM0010497;EVM0018120
GO:0031354	intrinsic component of plastid outer membrane	1	cellular_component	EVM0014534;EVM0000171
GO:0002474	antigen processing and presentation of peptide antigen via MHC class I	1	biological_process	EVM0010497;EVM0018120
GO:0005741	mitochondrial outer membrane	1	cellular_component	EVM0019758;EVM0011856;EVM0006838;EVM0014041
GO:0016667	oxidoreductase activity, acting on a sulfur group of donors	1	molecular_function	EVM0010497;EVM0015507;EVM0017094;EVM0015060
GO:0040011	locomotion	1	biological_process	EVM0024267;EVM0009006;EVM0018634;EVM0001378;EVM0015823;EVM0018120
GO:0051338	regulation of transferase activity	1	biological_process	EVM0009006;EVM0023829;EVM0009661;EVM0015823;EVM0018120
GO:0030858	positive regulation of epithelial cell differentiation	1	biological_process	EVM0023774
GO:0071332	cellular response to fructose stimulus	1	biological_process	EVM0021706
GO:0061084	negative regulation of protein refolding	1	biological_process	EVM0023829
GO:0061083	regulation of protein refolding	1	biological_process	EVM0023829
GO:0004640	phosphoribosylanthranilate isomerase activity	1	molecular_function	EVM0001985
GO:0031371	ubiquitin conjugating enzyme complex	1	cellular_component	EVM0006862
GO:0001948	glycoprotein binding	1	molecular_function	EVM0020882
GO:0030834	regulation of actin filament depolymerization	1	biological_process	EVM0024296
GO:0030835	negative regulation of actin filament depolymerization	1	biological_process	EVM0024296
GO:0030837	negative regulation of actin filament polymerization	1	biological_process	EVM0024296
GO:0032272	negative regulation of protein polymerization	1	biological_process	EVM0024296
GO:0009512	cytochrome b6f complex	1	cellular_component	EVM0014397
GO:0008252	nucleotidase activity	1	molecular_function	EVM0013906
GO:0030286	dynein complex	1	cellular_component	EVM0001534
GO:0030041	actin filament polymerization	1	biological_process	EVM0020410
GO:0051693	actin filament capping	1	biological_process	EVM0024296
GO:0070997	neuron death	1	biological_process	EVM0023829
GO:0031372	UBC13-MMS2 complex	1	cellular_component	EVM0006862
GO:0046905	phytoene synthase activity	1	molecular_function	EVM0022556
GO:0004633	phosphopantothenoylcysteine decarboxylase activity	1	molecular_function	EVM0023612
GO:0045606	positive regulation of epidermal cell differentiation	1	biological_process	EVM0023774
GO:0010175	sphingosine transmembrane transporter activity	1	molecular_function	EVM0006825
GO:0001726	ruffle	1	cellular_component	EVM0023774
GO:0050678	regulation of epithelial cell proliferation	1	biological_process	EVM0023774
GO:0050679	positive regulation of epithelial cell proliferation	1	biological_process	EVM0023774
GO:0043394	proteoglycan binding	1	molecular_function	EVM0020882
GO:1903333	negative regulation of protein folding	1	biological_process	EVM0023829
GO:0031514	motile cilium	1	cellular_component	EVM0001534
GO:0050619	phytochromobilin:ferredoxin oxidoreductase activity	1	molecular_function	EVM0002565
GO:0046624	sphingolipid transporter activity	1	molecular_function	EVM0006825
GO:0004750	ribulose-phosphate 3-epimerase activity	1	molecular_function	EVM0001560
GO:0046028	electron transporter, transferring electrons from cytochrome b6/f complex of photosystem II activity	1	molecular_function	EVM0014397
GO:0010997	anaphase-promoting complex binding	1	molecular_function	EVM0006531
GO:0032838	cell projection cytoplasm	1	cellular_component	EVM0001534
GO:0016048	detection of temperature stimulus	1	biological_process	EVM0019160
GO:0004140	dephospho-CoA kinase activity	1	molecular_function	EVM0009520
GO:0097014	ciliary plasm	1	cellular_component	EVM0001534
GO:0052631	sphingolipid delta-8 desaturase activity	1	molecular_function	EVM0000417
GO:0016767	geranylgeranyl-diphosphate geranylgeranyltransferase activity	1	molecular_function	EVM0022556
GO:0015949	nucleobase-containing small molecule interconversion	1	biological_process	EVM0023774
GO:0090083	regulation of inclusion body assembly	1	biological_process	EVM0023829
GO:0010478	chlororespiration	1	biological_process	EVM0022503
GO:0008441	3'(2'),5'-bisphosphate nucleotidase activity	1	molecular_function	EVM0013906
GO:0004150	dihydroneopterin aldolase activity	1	molecular_function	EVM0022702
GO:0045618	positive regulation of keratinocyte differentiation	1	biological_process	EVM0023774
GO:0045616	regulation of keratinocyte differentiation	1	biological_process	EVM0023774
GO:0034622	cellular macromolecular complex assembly	1	biological_process	EVM0003469;EVM0017170;EVM0002162;EVM0004313;EVM0015747;EVM0015645;EVM0020410
GO:0010193	response to ozone	1	biological_process	EVM0012858;EVM0014245;EVM0006391
GO:0045926	negative regulation of growth	1	biological_process	EVM0002997;EVM0011864;EVM0006531
GO:0005815	microtubule organizing center	1	cellular_component	EVM0009006;EVM0001378;EVM0015823
GO:0015992	proton transport	1	biological_process	EVM0016487;EVM0008714;EVM0014940;EVM0018634
GO:0006818	hydrogen transport	1	biological_process	EVM0016487;EVM0008714;EVM0014940;EVM0018634
GO:0016857	racemase and epimerase activity, acting on carbohydrates and derivatives	1	molecular_function	EVM0001560;EVM0008898
GO:0098807	chloroplast thylakoid membrane protein complex	1	cellular_component	EVM0012943;EVM0023219
GO:0010972	negative regulation of G2/M transition of mitotic cell cycle	1	biological_process	EVM0009006;EVM0015823
GO:0045275	respiratory chain complex III	1	cellular_component	EVM0020107;EVM0000520
GO:1902750	negative regulation of cell cycle G2/M phase transition	1	biological_process	EVM0009006;EVM0015823
GO:0031146	SCF-dependent proteasomal ubiquitin-dependent protein catabolic process	1	biological_process	EVM0009006;EVM0015823
GO:0005750	mitochondrial respiratory chain complex III	1	cellular_component	EVM0020107;EVM0000520
GO:0000785	chromatin	1	cellular_component	EVM0003985;EVM0021495;EVM0015645;EVM0011623
GO:0009527	plastid outer membrane	1	cellular_component	EVM0014534;EVM0011856;EVM0003932;EVM0000171
GO:0045787	positive regulation of cell cycle	1	biological_process	EVM0009006;EVM0015823;EVM0018120
GO:0006897	endocytosis	1	biological_process	EVM0003575;EVM0009006;EVM0018634;EVM0015823;EVM0023182
GO:0016020	membrane	1	cellular_component	EVM0016487;EVM0012858;EVM0011432;EVM0015498;EVM0015555;EVM0001346;EVM0024511;EVM0017271;EVM0008635;EVM0020468;EVM0017073;EVM0010592;EVM0003469;EVM0002998;EVM0021202;EVM0023774;EVM0023770;EVM0018496;EVM0017858;EVM0012027;EVM0007988;EVM0001120;EVM0019836;EVM0014534;EVM0023213;EVM0008466;EVM0014036;EVM0007732;EVM0011085;EVM0016520;EVM0016030;EVM0010497;EVM0003733;EVM0013360;EVM0012462;EVM0017718;EVM…
GO:0051128	regulation of cellular component organization	1	biological_process	EVM0009006;EVM0023829;EVM0011864;EVM0024296;EVM0001378;EVM0013532;EVM0015823;EVM0020410
GO:0044087	regulation of cellular component biogenesis	1	biological_process	EVM0023829;EVM0024296;EVM0020410
GO:0048729	tissue morphogenesis	1	biological_process	EVM0009006;EVM0015823
GO:0032544	plastid translation	1	biological_process	EVM0004183;EVM0012719
GO:0043254	regulation of protein complex assembly	1	biological_process	EVM0024296;EVM0020410
GO:0010598	NAD(P)H dehydrogenase complex (plastoquinone)	1	cellular_component	EVM0016019;EVM0011789
GO:0002009	morphogenesis of an epithelium	1	biological_process	EVM0009006;EVM0015823
GO:0098805	whole membrane	1	cellular_component	EVM0016487;EVM0002998;EVM0001120;EVM0014534;EVM0019758;EVM0017324;EVM0013423;EVM0000927;EVM0011856;EVM0003358;EVM0001691;EVM0002035;EVM0001494;EVM0006838;EVM0018544;EVM0008714;EVM0011864;EVM0006281;EVM0014041;EVM0003932;EVM0017543;EVM0000171;EVM0014940;EVM0018634;EVM0008748;EVM0011834;EVM0015290;EVM0004587;EVM0020779;EVM0008868;EVM0005485;EVM0018120
GO:0007031	peroxisome organization	1	biological_process	EVM0013423;EVM0003358;EVM0005649
GO:0002119	nematode larval development	1	biological_process	EVM0016142;EVM0009006;EVM0018634;EVM0015823;EVM0018120
GO:0002164	larval development	1	biological_process	EVM0016142;EVM0009006;EVM0018634;EVM0015823;EVM0018120
GO:0044770	cell cycle phase transition	1	biological_process	EVM0009006;EVM0015823;EVM0018120
GO:0044772	mitotic cell cycle phase transition	1	biological_process	EVM0009006;EVM0015823;EVM0018120
GO:0031400	negative regulation of protein modification process	1	biological_process	EVM0023829;EVM0009661;EVM0018120
GO:0031329	regulation of cellular catabolic process	1	biological_process	EVM0009006;EVM0015823;EVM0018120
GO:0048510	regulation of timing of transition from vegetative to reproductive phase	1	biological_process	EVM0012527;EVM0000111
GO:0044815	DNA packaging complex	1	cellular_component	EVM0015645;EVM0011623
GO:0030261	chromosome condensation	1	biological_process	EVM0009006;EVM0015823
GO:0010389	regulation of G2/M transition of mitotic cell cycle	1	biological_process	EVM0009006;EVM0015823
GO:1902749	regulation of cell cycle G2/M phase transition	1	biological_process	EVM0009006;EVM0015823
GO:0048506	regulation of timing of meristematic phase transition	1	biological_process	EVM0012527;EVM0000111
GO:0045137	development of primary sexual characteristics	1	biological_process	EVM0009006;EVM0015823
GO:0030529	intracellular ribonucleoprotein complex	1	cellular_component	EVM0009053;EVM0014704;EVM0002998;EVM0002350;EVM0017718;EVM0004176;EVM0000816;EVM0022792;EVM0009322;EVM0005449;EVM0006364;EVM0000358;EVM0008417;EVM0006382;EVM0020779;EVM0018120
GO:1990904	ribonucleoprotein complex	1	cellular_component	EVM0009053;EVM0014704;EVM0002998;EVM0002350;EVM0017718;EVM0004176;EVM0000816;EVM0022792;EVM0009322;EVM0005449;EVM0006364;EVM0000358;EVM0008417;EVM0006382;EVM0020779;EVM0018120
GO:0008340	determination of adult lifespan	1	biological_process	EVM0016142;EVM0009006;EVM0015823
GO:0005840	ribosome	1	cellular_component	EVM0014704;EVM0002998;EVM0002350;EVM0017718;EVM0004176;EVM0000816;EVM0022792;EVM0005449;EVM0006364;EVM0000358;EVM0008417;EVM0006382;EVM0020779;EVM0018120
GO:0006625	protein targeting to peroxisome	1	biological_process	EVM0013423;EVM0005649
GO:1902903	regulation of supramolecular fiber organization	1	biological_process	EVM0024296;EVM0020410
GO:0072663	establishment of protein localization to peroxisome	1	biological_process	EVM0013423;EVM0005649
GO:0072662	protein localization to peroxisome	1	biological_process	EVM0013423;EVM0005649
GO:0004842	ubiquitin-protein transferase activity	1	molecular_function	EVM0001636;EVM0013423;EVM0009006;EVM0021854;EVM0022059;EVM0007227;EVM0015823

## Sheet: ABA  48h
id	description	p_fdr	namespace	genes_in_study
GO:0005856	cytoskeleton	0.004	cellular_component	EVM0005376;EVM0001378;EVM0020147;EVM0002647;EVM0019102;EVM0020410;EVM0024327;EVM0020012;EVM0001367;EVM0002402;EVM0022353;EVM0022942;EVM0014606
GO:0005874	microtubule	0.014	cellular_component	EVM0001378;EVM0020147;EVM0024327;EVM0001367;EVM0002402;EVM0022942;EVM0014606
GO:0099513	polymeric cytoskeletal fiber	0.016	cellular_component	EVM0001378;EVM0020147;EVM0024327;EVM0001367;EVM0002402;EVM0022942;EVM0014606
GO:0005819	spindle	0.018	cellular_component	EVM0005376;EVM0001378;EVM0020147;EVM0019102;EVM0024327;EVM0022942;EVM0014606
GO:0099512	supramolecular fiber	0.024	cellular_component	EVM0001378;EVM0020147;EVM0024327;EVM0001367;EVM0002402;EVM0022942;EVM0014606
GO:0099080	supramolecular complex	0.024	cellular_component	EVM0001378;EVM0020147;EVM0024327;EVM0001367;EVM0002402;EVM0022942;EVM0014606
GO:0099081	supramolecular polymer	0.024	cellular_component	EVM0001378;EVM0020147;EVM0024327;EVM0001367;EVM0002402;EVM0022942;EVM0014606
GO:0007051	spindle organization	0.024	biological_process	EVM0001378;EVM0020147;EVM0022942;EVM0014606;EVM0014606
GO:0007010	cytoskeleton organization	0.034	biological_process	EVM0005376;EVM0001378;EVM0020147;EVM0020410;EVM0001367;EVM0002402;EVM0022942;EVM0014606;EVM0011623
GO:0007088	regulation of mitotic nuclear division	0.034	biological_process	EVM0001378;EVM0014208;EVM0022942;EVM0014606
GO:0051258	protein polymerization	0.046	biological_process	EVM0020410;EVM0001367;EVM0002402
GO:0015630	microtubule cytoskeleton	0.05	cellular_component	EVM0005376;EVM0001378;EVM0020147;EVM0019102;EVM0024327;EVM0001367;EVM0002402;EVM0022942;EVM0014606
GO:0044430	cytoskeletal part	0.052	cellular_component	EVM0005376;EVM0001378;EVM0020147;EVM0019102;EVM0024327;EVM0001367;EVM0002402;EVM0022942;EVM0014606
GO:0000226	microtubule cytoskeleton organization	0.054	biological_process	EVM0001378;EVM0020147;EVM0001367;EVM0002402;EVM0022942;EVM0014606;EVM0011623
GO:0005876	spindle microtubule	0.056	cellular_component	EVM0001378;EVM0020147;EVM0022942;EVM0014606
GO:0007017	microtubule-based process	0.08	biological_process	EVM0001378;EVM0020147;EVM0001367;EVM0002402;EVM0022942;EVM0014606;EVM0011623
GO:0009524	phragmoplast	0.086	cellular_component	EVM0005376;EVM0020147;EVM0024327;EVM0001367;EVM0002402;EVM0022353
GO:0010639	negative regulation of organelle organization	0.136	biological_process	EVM0001378;EVM0014208;EVM0022942;EVM0014606
GO:0005881	cytoplasmic microtubule	0.136	cellular_component	EVM0001378;EVM0001367;EVM0002402;EVM0022942
GO:0044111	development involved in symbiotic interaction	0.138	biological_process	EVM0001367;EVM0002402
GO:0044115	development of symbiont involved in interaction with host	0.138	biological_process	EVM0001367;EVM0002402
GO:0052093	formation of specialized structure for nutrient acquisition from host	0.138	biological_process	EVM0001367;EVM0002402
GO:0052096	formation by symbiont of syncytium involving giant cell for nutrient acquisition from host	0.138	biological_process	EVM0001367;EVM0002402
GO:0052095	formation of specialized structure for nutrient acquisition from other organism involved in symbiotic interaction	0.138	biological_process	EVM0001367;EVM0002402
GO:0044002	acquisition of nutrients from host	0.138	biological_process	EVM0001367;EVM0002402
GO:0051816	acquisition of nutrients from other organism during symbiotic interaction	0.138	biological_process	EVM0001367;EVM0002402
GO:0007094	mitotic spindle assembly checkpoint	0.214	biological_process	EVM0001378;EVM0014208;EVM0022942
GO:0071173	spindle assembly checkpoint	0.214	biological_process	EVM0001378;EVM0014208;EVM0022942
GO:0007052	mitotic spindle organization	0.234	biological_process	EVM0001378;EVM0022942;EVM0014606;EVM0014606
GO:0071174	mitotic spindle checkpoint	0.248	biological_process	EVM0001378;EVM0014208;EVM0022942
GO:0031577	spindle checkpoint	0.248	biological_process	EVM0001378;EVM0014208;EVM0022942
GO:0051129	negative regulation of cellular component organization	0.26	biological_process	EVM0001378;EVM0014208;EVM0022942;EVM0014606
GO:2000816	negative regulation of mitotic sister chromatid separation	0.27	biological_process	EVM0001378;EVM0014208;EVM0022942
GO:1905819	negative regulation of chromosome separation	0.27	biological_process	EVM0001378;EVM0014208;EVM0022942
GO:0033046	negative regulation of sister chromatid segregation	0.27	biological_process	EVM0001378;EVM0014208;EVM0022942
GO:0033048	negative regulation of mitotic sister chromatid segregation	0.27	biological_process	EVM0001378;EVM0014208;EVM0022942
GO:0045839	negative regulation of mitotic nuclear division	0.27	biological_process	EVM0001378;EVM0014208;EVM0022942
GO:0045841	negative regulation of mitotic metaphase/anaphase transition	0.27	biological_process	EVM0001378;EVM0014208;EVM0022942
GO:0051985	negative regulation of chromosome segregation	0.27	biological_process	EVM0001378;EVM0014208;EVM0022942
GO:1902100	negative regulation of metaphase/anaphase transition of cell cycle	0.27	biological_process	EVM0001378;EVM0014208;EVM0022942
GO:0043234	protein complex	0.28	cellular_component	EVM0005376;EVM0001378;EVM0014208;EVM0020147;EVM0016760;EVM0018634;EVM0019102;EVM0003314;EVM0004692;EVM0020080;EVM0020410;EVM0024327;EVM0002280;EVM0001367;EVM0005776;EVM0014695;EVM0002402;EVM0008075;EVM0020238;EVM0022942;EVM0014606;EVM0002826
GO:0008017	microtubule binding	0.282	molecular_function	EVM0005376;EVM0001367;EVM0002402;EVM0014606
GO:0033045	regulation of sister chromatid segregation	0.292	biological_process	EVM0001378;EVM0014208;EVM0022942
GO:1905818	regulation of chromosome separation	0.292	biological_process	EVM0001378;EVM0014208;EVM0022942
GO:0033047	regulation of mitotic sister chromatid segregation	0.292	biological_process	EVM0001378;EVM0014208;EVM0022942
GO:0030071	regulation of mitotic metaphase/anaphase transition	0.292	biological_process	EVM0001378;EVM0014208;EVM0022942
GO:0010965	regulation of mitotic sister chromatid separation	0.292	biological_process	EVM0001378;EVM0014208;EVM0022942
GO:1902099	regulation of metaphase/anaphase transition of cell cycle	0.292	biological_process	EVM0001378;EVM0014208;EVM0022942
GO:0031109	microtubule polymerization or depolymerization	0.328	biological_process	EVM0001367;EVM0002402
GO:0006878	cellular copper ion homeostasis	0.328	biological_process	EVM0006702;EVM0020712
GO:0046785	microtubule polymerization	0.328	biological_process	EVM0001367;EVM0002402
GO:0051784	negative regulation of nuclear division	0.43	biological_process	EVM0001378;EVM0014208;EVM0022942
GO:0051983	regulation of chromosome segregation	0.43	biological_process	EVM0001378;EVM0014208;EVM0022942
GO:0007631	feeding behavior	0.544	biological_process	EVM0001367;EVM0002402
GO:0051225	spindle assembly	0.544	biological_process	EVM0020147;EVM0014606
GO:0005871	kinesin complex	0.544	cellular_component	EVM0020147;EVM0014606
GO:0007610	behavior	0.632	biological_process	EVM0001378;EVM0001367;EVM0002402;EVM0022942
GO:0015631	tubulin binding	0.632	molecular_function	EVM0005376;EVM0001367;EVM0002402;EVM0014606
GO:0032991	macromolecular complex	0.638	cellular_component	EVM0005376;EVM0001378;EVM0014208;EVM0020147;EVM0016760;EVM0009322;EVM0018634;EVM0015645;EVM0019102;EVM0003314;EVM0004692;EVM0020080;EVM0006382;EVM0020410;EVM0024327;EVM0002280;EVM0001367;EVM0005776;EVM0014695;EVM0002402;EVM0000816;EVM0008075;EVM0020238;EVM0022942;EVM0014606;EVM0002826;EVM0011623
GO:2001251	negative regulation of chromosome organization	0.638	biological_process	EVM0001378;EVM0014208;EVM0022942
GO:0043933	macromolecular complex subunit organization	0.672	biological_process	EVM0001378;EVM0020147;EVM0015645;EVM0020410;EVM0001367;EVM0020615;EVM0002402;EVM0022942;EVM0014606
GO:0055070	copper ion homeostasis	0.694	biological_process	EVM0006702;EVM0020712
GO:0046786	viral replication complex formation and maintenance	0.694	biological_process	EVM0009978;EVM0017038
GO:1990939	ATP-dependent microtubule motor activity	0.694	molecular_function	EVM0020147;EVM0014606
GO:0051128	regulation of cellular component organization	0.766	biological_process	EVM0001378;EVM0014208;EVM0020410;EVM0022942;EVM0014606;EVM0002826;EVM0010793
GO:0051783	regulation of nuclear division	0.766	biological_process	EVM0001378;EVM0014208;EVM0022942;EVM0014606
GO:1903047	mitotic cell cycle process	0.804	biological_process	EVM0001378;EVM0014208;EVM0001367;EVM0002402;EVM0022942;EVM0014606
GO:0065003	macromolecular complex assembly	0.808	biological_process	EVM0020147;EVM0015645;EVM0020410;EVM0001367;EVM0020615;EVM0002402;EVM0014606
GO:0005813	centrosome	0.81	cellular_component	EVM0001378;EVM0022942;EVM0014606
GO:1902850	microtubule cytoskeleton organization involved in mitosis	0.81	biological_process	EVM0001378;EVM0022942;EVM0014606
GO:0016469	proton-transporting two-sector ATPase complex	0.81	cellular_component	EVM0018634;EVM0005776;EVM0014695
GO:0019079	viral genome replication	0.822	biological_process	EVM0009978;EVM0017038
GO:0098800	inner mitochondrial membrane protein complex	0.86	cellular_component	EVM0003314;EVM0004692;EVM0005776;EVM0014695;EVM0020238
GO:0051726	regulation of cell cycle	0.862	biological_process	EVM0001378;EVM0014208;EVM0018377;EVM0002280;EVM0022942;EVM0014606;EVM0017661
GO:0071822	protein complex subunit organization	0.864	biological_process	EVM0001378;EVM0020147;EVM0020410;EVM0001367;EVM0020615;EVM0002402;EVM0022942;EVM0014606
GO:0051701	interaction with host	0.888	biological_process	EVM0001367;EVM0012866;EVM0002402
GO:0005200	structural constituent of cytoskeleton	0.888	molecular_function	EVM0001378;EVM0020012;EVM0022942
GO:0007346	regulation of mitotic cell cycle	0.89	biological_process	EVM0001378;EVM0014208;EVM0022942;EVM0014606
GO:0098798	mitochondrial protein complex	0.9	cellular_component	EVM0003314;EVM0004692;EVM0005776;EVM0014695;EVM0020238
GO:0001966	thigmotaxis	0.9	biological_process	EVM0001378;EVM0022942
GO:0019730	antimicrobial humoral response	0.9	biological_process	EVM0001378;EVM0022942
GO:0003774	motor activity	0.9	molecular_function	EVM0020147;EVM0014606
GO:0003777	microtubule motor activity	0.9	molecular_function	EVM0020147;EVM0014606
GO:0000235	astral microtubule	0.9	cellular_component	EVM0001378;EVM0022942
GO:0005818	aster	0.9	cellular_component	EVM0001378;EVM0022942
GO:0008092	cytoskeletal protein binding	0.922	molecular_function	EVM0005376;EVM0001367;EVM0002402;EVM0014606
GO:0005815	microtubule organizing center	0.924	cellular_component	EVM0001378;EVM0022942;EVM0014606
GO:0006461	protein complex assembly	0.93	biological_process	EVM0020147;EVM0020410;EVM0001367;EVM0020615;EVM0002402;EVM0014606
GO:0007049	cell cycle	0.934	biological_process	EVM0001378;EVM0014208;EVM0020147;EVM0001367;EVM0002402;EVM0022942;EVM0014606;EVM0002826;EVM0011623
GO:0070271	protein complex biogenesis	0.938	biological_process	EVM0020147;EVM0020410;EVM0001367;EVM0020615;EVM0002402;EVM0014606
GO:0022402	cell cycle process	0.938	biological_process	EVM0001378;EVM0014208;EVM0020147;EVM0001367;EVM0002402;EVM0022942;EVM0014606;EVM0002826;EVM0011623
GO:0007093	mitotic cell cycle checkpoint	0.94	biological_process	EVM0001378;EVM0014208;EVM0022942
GO:0007638	mechanosensory behavior	0.942	biological_process	EVM0001378;EVM0022942
GO:0000786	nucleosome	0.942	cellular_component	EVM0015645;EVM0011623
GO:0010948	negative regulation of cell cycle process	0.95	biological_process	EVM0001378;EVM0014208;EVM0022942;EVM0017661
GO:1901991	negative regulation of mitotic cell cycle phase transition	0.952	biological_process	EVM0001378;EVM0014208;EVM0022942
GO:0009612	response to mechanical stimulus	0.952	biological_process	EVM0005376;EVM0001378;EVM0022942
GO:0010564	regulation of cell cycle process	0.952	biological_process	EVM0001378;EVM0014208;EVM0022942;EVM0014606;EVM0017661
GO:0045930	negative regulation of mitotic cell cycle	0.954	biological_process	EVM0001378;EVM0014208;EVM0022942
GO:0043094	cellular metabolic compound salvage	0.954	biological_process	EVM0003314;EVM0004692;EVM0009550;EVM0020238
GO:0006959	humoral immune response	0.956	biological_process	EVM0001378;EVM0022942
GO:0033043	regulation of organelle organization	0.956	biological_process	EVM0001378;EVM0014208;EVM0020410;EVM0022942;EVM0014606
GO:0045786	negative regulation of cell cycle	0.956	biological_process	EVM0001378;EVM0014208;EVM0022942;EVM0017661
GO:0045298	tubulin complex	0.962	cellular_component	EVM0001378;EVM0022942
GO:0000162	tryptophan biosynthetic process	0.962	biological_process	EVM0001985;EVM0000209
GO:0006471	protein ADP-ribosylation	0.962	biological_process	EVM0008109;EVM0011635
GO:0044455	mitochondrial membrane part	0.974	cellular_component	EVM0003314;EVM0004692;EVM0005776;EVM0014695;EVM0020238
GO:1901990	regulation of mitotic cell cycle phase transition	0.974	biological_process	EVM0001378;EVM0014208;EVM0022942
GO:0043228	non-membrane-bounded organelle	0.978	cellular_component	EVM0005376;EVM0001378;EVM0014208;EVM0020147;EVM0016760;EVM0002647;EVM0015645;EVM0019102;EVM0003314;EVM0006382;EVM0017418;EVM0020410;EVM0024327;EVM0019160;EVM0020012;EVM0001367;EVM0002402;EVM0022353;EVM0000816;EVM0022942;EVM0014606;EVM0011623
GO:0043232	intracellular non-membrane-bounded organelle	0.978	cellular_component	EVM0005376;EVM0001378;EVM0014208;EVM0020147;EVM0016760;EVM0002647;EVM0015645;EVM0019102;EVM0003314;EVM0006382;EVM0017418;EVM0020410;EVM0024327;EVM0019160;EVM0020012;EVM0001367;EVM0002402;EVM0022353;EVM0000816;EVM0022942;EVM0014606;EVM0011623
GO:0098656	anion transmembrane transport	0.978	biological_process	EVM0000171;EVM0024272;EVM0003932;EVM0013848
GO:0000075	cell cycle checkpoint	0.978	biological_process	EVM0001378;EVM0014208;EVM0022942
GO:0046219	indolalkylamine biosynthetic process	0.982	biological_process	EVM0001985;EVM0000209
GO:0030424	axon	0.982	cellular_component	EVM0001378;EVM0022942
GO:0009853	photorespiration	0.986	biological_process	EVM0003314;EVM0004692;EVM0020238
GO:0055076	transition metal ion homeostasis	0.996	biological_process	EVM0006702;EVM0020712;EVM0020080
GO:1901988	negative regulation of cell cycle phase transition	0.996	biological_process	EVM0001378;EVM0014208;EVM0022942
GO:0044815	DNA packaging complex	0.996	cellular_component	EVM0015645;EVM0011623
GO:0033044	regulation of chromosome organization	0.998	biological_process	EVM0001378;EVM0014208;EVM0022942
GO:0034622	cellular macromolecular complex assembly	0.998	biological_process	EVM0015645;EVM0020410;EVM0001367;EVM0020615;EVM0002402
GO:0051298	centrosome duplication	0.998	biological_process	EVM0014606;EVM0011623
GO:1902903	regulation of supramolecular fiber organization	0.998	biological_process	EVM0020410;EVM0014606
GO:0055028	cortical microtubule	0.998	cellular_component	EVM0001367;EVM0002402
GO:0044403	symbiosis, encompassing mutualism through parasitism	0.998	biological_process	EVM0009978;EVM0001367;EVM0017038;EVM0012866;EVM0002402
GO:1901987	regulation of cell cycle phase transition	0.998	biological_process	EVM0001378;EVM0014208;EVM0022942
GO:0004640	phosphoribosylanthranilate isomerase activity	0.998	molecular_function	EVM0001985
GO:0008569	ATP-dependent microtubule motor activity, minus-end-directed	0.998	molecular_function	EVM0020147
GO:0001948	glycoprotein binding	0.998	molecular_function	EVM0020882
GO:0008930	methylthioadenosine nucleosidase activity	0.998	molecular_function	EVM0009550
GO:0008252	nucleotidase activity	0.998	molecular_function	EVM0013906
GO:0017119	Golgi transport complex	0.998	cellular_component	EVM0020080
GO:0030041	actin filament polymerization	0.998	biological_process	EVM0020410
GO:0015141	succinate transmembrane transporter activity	0.998	molecular_function	EVM0024272
GO:0033984	indole-3-glycerol-phosphate lyase activity	0.998	molecular_function	EVM0000209
GO:0015976	carbon utilization	0.998	biological_process	EVM0024272
GO:0010175	sphingosine transmembrane transporter activity	0.998	molecular_function	EVM0006825
GO:0043394	proteoglycan binding	0.998	molecular_function	EVM0020882
GO:0005469	succinate:fumarate antiporter activity	0.998	molecular_function	EVM0024272
GO:0046624	sphingolipid transporter activity	0.998	molecular_function	EVM0006825
GO:0015744	succinate transport	0.998	biological_process	EVM0024272
GO:0015741	fumarate transport	0.998	biological_process	EVM0024272
GO:0007053	spindle assembly involved in male meiosis	0.998	biological_process	EVM0020147
GO:0016048	detection of temperature stimulus	0.998	biological_process	EVM0019160
GO:0047560	3-dehydrosphinganine reductase activity	0.998	molecular_function	EVM0008895
GO:0071422	succinate transmembrane transport	0.998	biological_process	EVM0024272
GO:0052631	sphingolipid delta-8 desaturase activity	0.998	molecular_function	EVM0000417
GO:0045733	acetate catabolic process	0.998	biological_process	EVM0024272
GO:0005872	minus-end kinesin complex	0.998	cellular_component	EVM0020147
GO:0010478	chlororespiration	0.998	biological_process	EVM0022503
GO:0009971	anastral spindle assembly involved in male meiosis	0.998	biological_process	EVM0020147
GO:0008441	3'(2'),5'-bisphosphate nucleotidase activity	0.998	molecular_function	EVM0013906
GO:0015138	fumarate transmembrane transporter activity	0.998	molecular_function	EVM0024272
GO:0090306	spindle assembly involved in meiosis	0.998	biological_process	EVM0020147
GO:0055048	anastral spindle assembly	0.998	biological_process	EVM0020147
GO:0006586	indolalkylamine metabolic process	1	biological_process	EVM0001985;EVM0000209
GO:0019058	viral life cycle	1	biological_process	EVM0009978;EVM0017038
GO:0006568	tryptophan metabolic process	1	biological_process	EVM0001985;EVM0000209
GO:0034219	carbohydrate transmembrane transport	1	biological_process	EVM0016127;EVM0013848;EVM0004729
GO:0044419	interspecies interaction between organisms	1	biological_process	EVM0009978;EVM0001367;EVM0017038;EVM0012866;EVM0002402
GO:0005747	mitochondrial respiratory chain complex I	1	cellular_component	EVM0003314;EVM0004692;EVM0020238
GO:0009574	preprophase band	1	cellular_component	EVM0001367;EVM0002402
GO:0005753	mitochondrial proton-transporting ATP synthase complex	1	cellular_component	EVM0005776;EVM0014695
GO:0051493	regulation of cytoskeleton organization	1	biological_process	EVM0020410;EVM0014606
GO:0045259	proton-transporting ATP synthase complex	1	cellular_component	EVM0005776;EVM0014695
GO:0000922	spindle pole	1	cellular_component	EVM0024327;EVM0014606
GO:0030964	NADH dehydrogenase complex	1	cellular_component	EVM0003314;EVM0004692;EVM0020238
GO:0045271	respiratory chain complex I	1	cellular_component	EVM0003314;EVM0004692;EVM0020238
GO:1903825	organic acid transmembrane transport	1	biological_process	EVM0000171;EVM0024272;EVM0003932
GO:1905039	carboxylic acid transmembrane transport	1	biological_process	EVM0000171;EVM0024272;EVM0003932
GO:0030981	cortical microtubule cytoskeleton	1	cellular_component	EVM0001367;EVM0002402
GO:0043623	cellular protein complex assembly	1	biological_process	EVM0020410;EVM0001367;EVM0020615;EVM0002402
GO:0051297	centrosome organization	1	biological_process	EVM0014606;EVM0011623
GO:0007098	centrosome cycle	1	biological_process	EVM0014606;EVM0011623
GO:0044297	cell body	1	cellular_component	EVM0001378;EVM0022942
GO:0043025	neuronal cell body	1	cellular_component	EVM0001378;EVM0022942
GO:0031023	microtubule organizing center organization	1	biological_process	EVM0014606;EVM0011623
GO:0040011	locomotion	1	biological_process	EVM0001378;EVM0018634;EVM0012866;EVM0022942
GO:0042401	cellular biogenic amine biosynthetic process	1	biological_process	EVM0001985;EVM0000209
GO:0009309	amine biosynthetic process	1	biological_process	EVM0001985;EVM0000209
GO:0006333	chromatin assembly or disassembly	1	biological_process	EVM0015645;EVM0011623
GO:0030863	cortical cytoskeleton	1	cellular_component	EVM0001367;EVM0002402
GO:0043005	neuron projection	1	cellular_component	EVM0001378;EVM0022942
GO:0046916	cellular transition metal ion homeostasis	1	biological_process	EVM0006702;EVM0020712
GO:0008514	organic anion transmembrane transporter activity	1	molecular_function	EVM0000171;EVM0024272;EVM0003932;EVM0013848
GO:0009624	response to nematode	1	biological_process	EVM0020080;EVM0001367;EVM0002402;EVM0013848
GO:0045454	cell redox homeostasis	1	biological_process	EVM0004700;EVM0015230
GO:0097435	supramolecular fiber organization	1	biological_process	EVM0020410;EVM0001367;EVM0002402
GO:0005743	mitochondrial inner membrane	1	cellular_component	EVM0003314;EVM0004692;EVM0024272;EVM0005776;EVM0014695;EVM0020238
GO:0018105	peptidyl-serine phosphorylation	1	biological_process	EVM0024327
GO:0035404	histone-serine phosphorylation	1	biological_process	EVM0024327
GO:0007026	negative regulation of microtubule depolymerization	1	biological_process	EVM0014606
GO:0010068	protoderm histogenesis	1	biological_process	EVM0001969
GO:0090224	regulation of spindle organization	1	biological_process	EVM0014606
GO:0045169	fusome	1	cellular_component	EVM0014606
GO:0003838	sterol 24-C-methyltransferase activity	1	molecular_function	EVM0017661
GO:0031111	negative regulation of microtubule polymerization or depolymerization	1	biological_process	EVM0014606
GO:0035174	histone serine kinase activity	1	molecular_function	EVM0024327
GO:0035175	histone kinase activity (H3-S10 specific)	1	molecular_function	EVM0024327
GO:0047918	GDP-mannose 3,5-epimerase activity	1	molecular_function	EVM0008898
GO:0051012	microtubule sliding	1	biological_process	EVM0014606
GO:0031535	plus-end directed microtubule sliding	1	biological_process	EVM0014606
GO:0018209	peptidyl-serine modification	1	biological_process	EVM0024327
GO:0060236	regulation of mitotic spindle organization	1	biological_process	EVM0014606
GO:0005873	plus-end kinesin complex	1	cellular_component	EVM0014606
GO:0043987	histone H3-S10 phosphorylation	1	biological_process	EVM0024327
GO:0080001	mucilage extrusion from seed coat	1	biological_process	EVM0009660
GO:0047746	chlorophyllase activity	1	molecular_function	EVM0008371
GO:0098796	membrane protein complex	1	cellular_component	EVM0018634;EVM0003314;EVM0004692;EVM0005776;EVM0014695;EVM0020238
GO:0009073	aromatic amino acid family biosynthetic process	1	biological_process	EVM0001985;EVM0000209
GO:0051084	'de novo' posttranslational protein folding	1	biological_process	EVM0001378;EVM0022942
GO:0006458	'de novo' protein folding	1	biological_process	EVM0001378;EVM0022942
GO:0044448	cell cortex part	1	cellular_component	EVM0001367;EVM0002402
GO:0070925	organelle assembly	1	biological_process	EVM0020147;EVM0014606
GO:0008643	carbohydrate transport	1	biological_process	EVM0016127;EVM0013848;EVM0004729
GO:0005746	mitochondrial respiratory chain	1	cellular_component	EVM0003314;EVM0004692;EVM0020238
GO:1902410	mitotic cytokinetic process	1	biological_process	EVM0001367;EVM0002402
GO:0000911	cytokinesis by cell plate formation	1	biological_process	EVM0001367;EVM0002402
GO:0042435	indole-containing compound biosynthetic process	1	biological_process	EVM0001985;EVM0000209
GO:0000280	nuclear division	1	biological_process	EVM0020147;EVM0001367;EVM0002402;EVM0014606
GO:0046943	carboxylic acid transmembrane transporter activity	1	molecular_function	EVM0000171;EVM0024272;EVM0003932
GO:0098803	respiratory chain complex	1	cellular_component	EVM0003314;EVM0004692;EVM0020238
GO:0045927	positive regulation of growth	1	biological_process	EVM0018634;EVM0016142;EVM0002826
GO:0005342	organic acid transmembrane transporter activity	1	molecular_function	EVM0000171;EVM0024272;EVM0003932
GO:0016021	integral component of membrane	1	cellular_component	EVM0000171;EVM0018634;EVM0016127;EVM0003294;EVM0024272;EVM0004729
GO:0019725	cellular homeostasis	1	biological_process	EVM0006702;EVM0020712;EVM0004700;EVM0015230
GO:0070469	respiratory chain	1	cellular_component	EVM0003314;EVM0004692;EVM0020238
GO:0015711	organic anion transport	1	biological_process	EVM0000171;EVM0024272;EVM0003932;EVM0013848
GO:0097458	neuron part	1	cellular_component	EVM0001378;EVM0022942
GO:0032506	cytokinetic process	1	biological_process	EVM0001367;EVM0002402
GO:0032993	protein-DNA complex	1	cellular_component	EVM0015645;EVM0011623
GO:0044708	single-organism behavior	1	biological_process	EVM0001378;EVM0022942
GO:0005457	GDP-fucose transmembrane transporter activity	1	molecular_function	EVM0013848
GO:0000220	vacuolar proton-transporting V-type ATPase, V0 domain	1	cellular_component	EVM0018634
GO:0051299	centrosome separation	1	biological_process	EVM0014606
GO:0043242	negative regulation of protein complex disassembly	1	biological_process	EVM0014606
GO:0008154	actin polymerization or depolymerization	1	biological_process	EVM0020410
GO:0000307	cyclin-dependent protein kinase holoenzyme complex	1	cellular_component	EVM0002280
GO:0070265	necrotic cell death	1	biological_process	EVM0018634
GO:0072686	mitotic spindle	1	cellular_component	EVM0014606
GO:1902904	negative regulation of supramolecular fiber organization	1	biological_process	EVM0014606
GO:0010939	regulation of necrotic cell death	1	biological_process	EVM0018634
GO:0007100	mitotic centrosome separation	1	biological_process	EVM0014606
GO:0033179	proton-transporting V-type ATPase, V0 domain	1	cellular_component	EVM0018634
GO:0033177	proton-transporting two-sector ATPase complex, proton-transporting domain	1	cellular_component	EVM0018634
GO:0000212	meiotic spindle organization	1	biological_process	EVM0020147
GO:0015783	GDP-fucose transport	1	biological_process	EVM0013848
GO:0031463	Cul3-RING ubiquitin ligase complex	1	cellular_component	EVM0008075
GO:0051494	negative regulation of cytoskeleton organization	1	biological_process	EVM0014606
GO:1901880	negative regulation of protein depolymerization	1	biological_process	EVM0014606
GO:0006083	acetate metabolic process	1	biological_process	EVM0024272
GO:0090307	mitotic spindle assembly	1	biological_process	EVM0014606
GO:0010940	positive regulation of necrotic cell death	1	biological_process	EVM0018634
GO:0009652	thigmotropism	1	biological_process	EVM0005376
GO:0004834	tryptophan synthase activity	1	molecular_function	EVM0000209
GO:0031224	intrinsic component of membrane	1	cellular_component	EVM0000171;EVM0018634;EVM0012536;EVM0005337;EVM0016127;EVM0003294;EVM0024272;EVM0005991;EVM0004729
GO:0009504	cell plate	1	cellular_component	EVM0024327;EVM0022353
GO:0005938	cell cortex	1	cellular_component	EVM0001367;EVM0002402
GO:0022607	cellular component assembly	1	biological_process	EVM0020147;EVM0015645;EVM0020410;EVM0001367;EVM0020615;EVM0002402;EVM0014606
GO:0099568	cytoplasmic region	1	cellular_component	EVM0001367;EVM0002402
GO:0031965	nuclear membrane	1	cellular_component	EVM0004888;EVM0024327
GO:0009072	aromatic amino acid family metabolic process	1	biological_process	EVM0001985;EVM0000209
GO:0042330	taxis	1	biological_process	EVM0001378;EVM0022942
GO:1990204	oxidoreductase complex	1	cellular_component	EVM0003314;EVM0004692;EVM0020238
GO:0071702	organic substance transport	1	biological_process	EVM0000171;EVM0006825;EVM0008109;EVM0011635;EVM0016127;EVM0024272;EVM0003932;EVM0013848;EVM0014606;EVM0004729
GO:0005737	cytoplasm	1	cellular_component	EVM0000171;EVM0014277;EVM0005263;EVM0016087;EVM0009355;EVM0005376;EVM0012871;EVM0001378;EVM0012858;EVM0016003;EVM0007365;EVM0008109;EVM0013763;EVM0014208;EVM0001858;EVM0013623;EVM0001173;EVM0001944;EVM0015410;EVM0021815;EVM0017274;EVM0017271;EVM0001985;EVM0020147;EVM0021352;EVM0007172;EVM0018634;EVM0014794;EVM0005510;EVM0015426;EVM0018544;EVM0015645;EVM0008371;EVM0019102;EVM0006390;EVM0024511;EVM…
GO:0006996	organelle organization	1	biological_process	EVM0005376;EVM0001378;EVM0020147;EVM0015645;EVM0003358;EVM0015441;EVM0020410;EVM0024327;EVM0001367;EVM0002402;EVM0022942;EVM0014606;EVM0002826;EVM0011623
GO:0006576	cellular biogenic amine metabolic process	1	biological_process	EVM0001985;EVM0000209
GO:0044106	cellular amine metabolic process	1	biological_process	EVM0001985;EVM0000209

## Sheet: Low temperature  24h
id	description	p_fdr	namespace	genes_in_study
GO:0001101	response to acid chemical	0.004	biological_process	EVM0010829;EVM0009160;EVM0003450;EVM0009794;EVM0008686;EVM0015751;EVM0006572;EVM0020210;EVM0013790;EVM0013310;EVM0003294;EVM0017833;EVM0019578;EVM0012697;EVM0008747;EVM0003476;EVM0005435;EVM0001421;EVM0014170;EVM0003043;EVM0003042;EVM0014771;EVM0009600;EVM0009603;EVM0023101;EVM0023104;EVM0001120;EVM0005423;EVM0010462;EVM0019212;EVM0003672;EVM0003671;EVM0023117;EVM0023595;EVM0019929;EVM0020029;EVM…
GO:0080044	quercetin 7-O-glucosyltransferase activity	0.004	molecular_function	EVM0022317;EVM0007360;EVM0002664;EVM0016510;EVM0013664;EVM0002533;EVM0017168;EVM0005207;EVM0006641;EVM0013544;EVM0008050;EVM0005247;EVM0010055
GO:0031323	regulation of cellular metabolic process	0.008	biological_process	EVM0013628;EVM0019509;EVM0006914;EVM0015033;EVM0008304;EVM0015503;EVM0003636;EVM0003985;EVM0007165;EVM0016409;EVM0014427;EVM0013106;EVM0016665;EVM0000400;EVM0004520;EVM0009794;EVM0024546;EVM0008686;EVM0008201;EVM0018861;EVM0018464;EVM0002907;EVM0001611;EVM0009363;EVM0014166;EVM0019308;EVM0024202;EVM0015369;EVM0010611;EVM0012697;EVM0009612;EVM0005435;EVM0006039;EVM0018063;EVM0001421;EVM0014170;EVM…
GO:2000112	regulation of cellular macromolecule biosynthetic process	0.008	biological_process	EVM0013628;EVM0019509;EVM0006914;EVM0015033;EVM0008304;EVM0015503;EVM0003636;EVM0003985;EVM0007165;EVM0016409;EVM0014427;EVM0013106;EVM0016665;EVM0000400;EVM0009794;EVM0008686;EVM0008201;EVM0018861;EVM0018464;EVM0002907;EVM0001611;EVM0009363;EVM0014166;EVM0019308;EVM0024202;EVM0010611;EVM0012697;EVM0005435;EVM0018063;EVM0001421;EVM0014170;EVM0003043;EVM0003042;EVM0015081;EVM0021741;EVM0009603;EVM…
GO:0009628	response to abiotic stimulus	0.008	biological_process	EVM0021894;EVM0013628;EVM0019880;EVM0022317;EVM0010829;EVM0015503;EVM0015501;EVM0002102;EVM0003450;EVM0012742;EVM0016409;EVM0014427;EVM0004520;EVM0014029;EVM0009794;EVM0022691;EVM0002664;EVM0020210;EVM0018861;EVM0005598;EVM0001611;EVM0004888;EVM0013310;EVM0003294;EVM0020359;EVM0008181;EVM0012697;EVM0006039;EVM0018063;EVM0001421;EVM0014170;EVM0021632;EVM0003043;EVM0003042;EVM0003049;EVM0020582;EVM…
GO:1901700	response to oxygen-containing compound	0.008	biological_process	EVM0021894;EVM0017617;EVM0010829;EVM0009160;EVM0003450;EVM0009794;EVM0008686;EVM0015751;EVM0006572;EVM0020210;EVM0018283;EVM0013790;EVM0013310;EVM0003294;EVM0017833;EVM0019578;EVM0012697;EVM0008747;EVM0003476;EVM0005435;EVM0001421;EVM0014170;EVM0003043;EVM0003042;EVM0014771;EVM0009600;EVM0009603;EVM0023101;EVM0023104;EVM0001120;EVM0005423;EVM0000723;EVM0010462;EVM0010793;EVM0006730;EVM0019212;EVM…
GO:2001141	regulation of RNA biosynthetic process	0.008	biological_process	EVM0019509;EVM0006914;EVM0015033;EVM0008304;EVM0015503;EVM0003636;EVM0003985;EVM0007165;EVM0016409;EVM0014427;EVM0013106;EVM0016665;EVM0000400;EVM0009794;EVM0008686;EVM0008201;EVM0018861;EVM0018464;EVM0002907;EVM0001611;EVM0009363;EVM0014166;EVM0019308;EVM0024202;EVM0015369;EVM0010611;EVM0012697;EVM0005435;EVM0018063;EVM0001421;EVM0014170;EVM0003043;EVM0003042;EVM0015081;EVM0021741;EVM0009603;EVM…
GO:0008194	UDP-glycosyltransferase activity	0.008	molecular_function	EVM0021896;EVM0022317;EVM0007360;EVM0024546;EVM0002664;EVM0016510;EVM0013664;EVM0019929;EVM0002533;EVM0016781;EVM0017168;EVM0005207;EVM0001693;EVM0006641;EVM0012126;EVM0013544;EVM0018397;EVM0009479;EVM0008050;EVM0015825;EVM0005247;EVM0001154;EVM0021868;EVM0002935;EVM0010055
GO:0050794	regulation of cellular process	0.008	biological_process	EVM0021894;EVM0013628;EVM0019509;EVM0017617;EVM0010829;EVM0006914;EVM0000237;EVM0015033;EVM0008304;EVM0009160;EVM0015503;EVM0003636;EVM0003985;EVM0007165;EVM0016409;EVM0014427;EVM0013106;EVM0016665;EVM0000400;EVM0004520;EVM0009794;EVM0024546;EVM0008686;EVM0008201;EVM0006572;EVM0018861;EVM0018464;EVM0002907;EVM0001611;EVM0001924;EVM0009363;EVM0014166;EVM0019308;EVM0024202;EVM0015369;EVM0010611;EVM…
GO:0010556	regulation of macromolecule biosynthetic process	0.008	biological_process	EVM0013628;EVM0019509;EVM0006914;EVM0015033;EVM0008304;EVM0015503;EVM0003636;EVM0003985;EVM0007165;EVM0016409;EVM0014427;EVM0013106;EVM0016665;EVM0000400;EVM0009794;EVM0008686;EVM0008201;EVM0018861;EVM0018464;EVM0002907;EVM0001611;EVM0009363;EVM0014166;EVM0019308;EVM0024202;EVM0015369;EVM0010611;EVM0012697;EVM0005435;EVM0018063;EVM0001421;EVM0014170;EVM0003043;EVM0003042;EVM0015081;EVM0021741;EVM…
GO:0005634	nucleus	0.01	cellular_component	EVM0013113;EVM0001348;EVM0013628;EVM0004190;EVM0019509;EVM0021412;EVM0017617;EVM0014997;EVM0006914;EVM0015033;EVM0008304;EVM0009160;EVM0023332;EVM0015501;EVM0003636;EVM0003985;EVM0007165;EVM0016409;EVM0013106;EVM0014353;EVM0019659;EVM0016665;EVM0020681;EVM0000400;EVM0014029;EVM0009794;EVM0008686;EVM0022691;EVM0001748;EVM0020321;EVM0006572;EVM0002264;EVM0018861;EVM0005062;EVM0018464;EVM0002907;EVM…
GO:0051252	regulation of RNA metabolic process	0.01	biological_process	EVM0019509;EVM0006914;EVM0015033;EVM0008304;EVM0015503;EVM0003636;EVM0003985;EVM0007165;EVM0016409;EVM0014427;EVM0013106;EVM0016665;EVM0000400;EVM0009794;EVM0008686;EVM0008201;EVM0018861;EVM0018464;EVM0002907;EVM0001611;EVM0009363;EVM0014166;EVM0019308;EVM0024202;EVM0015369;EVM0010611;EVM0012697;EVM0005435;EVM0018063;EVM0001421;EVM0014170;EVM0003043;EVM0003042;EVM0015081;EVM0021741;EVM0009603;EVM…
GO:0065007	biological regulation	0.01	biological_process	EVM0021894;EVM0013628;EVM0019880;EVM0019509;EVM0017617;EVM0010829;EVM0006914;EVM0000237;EVM0015033;EVM0009784;EVM0008304;EVM0009160;EVM0015503;EVM0015501;EVM0003636;EVM0003985;EVM0007165;EVM0016409;EVM0014427;EVM0013106;EVM0016665;EVM0013639;EVM0000400;EVM0004520;EVM0009794;EVM0024546;EVM0008686;EVM0008201;EVM0006572;EVM0020210;EVM0018861;EVM0018464;EVM0002907;EVM0001611;EVM0016697;EVM0016059;EVM…
GO:0050896	response to stimulus	0.01	biological_process	EVM0021894;EVM0013628;EVM0019880;EVM0022317;EVM0022319;EVM0017617;EVM0010829;EVM0015033;EVM0008304;EVM0009160;EVM0015503;EVM0007181;EVM0015501;EVM0002102;EVM0003450;EVM0012742;EVM0003857;EVM0007165;EVM0016409;EVM0014427;EVM0013923;EVM0020681;EVM0004520;EVM0014029;EVM0009794;EVM0008686;EVM0022691;EVM0015751;EVM0002660;EVM0002664;EVM0006572;EVM0020210;EVM0018863;EVM0018861;EVM0005598;EVM0001611;EVM…
GO:0006355	regulation of transcription, DNA-templated	0.01	biological_process	EVM0019509;EVM0006914;EVM0015033;EVM0008304;EVM0015503;EVM0003636;EVM0003985;EVM0007165;EVM0016409;EVM0014427;EVM0013106;EVM0016665;EVM0000400;EVM0009794;EVM0008686;EVM0008201;EVM0018861;EVM0018464;EVM0002907;EVM0001611;EVM0009363;EVM0014166;EVM0019308;EVM0024202;EVM0010611;EVM0012697;EVM0005435;EVM0018063;EVM0001421;EVM0014170;EVM0003043;EVM0003042;EVM0015081;EVM0021741;EVM0009603;EVM0021161;EVM…
GO:1903506	regulation of nucleic acid-templated transcription	0.01	biological_process	EVM0019509;EVM0006914;EVM0015033;EVM0008304;EVM0015503;EVM0003636;EVM0003985;EVM0007165;EVM0016409;EVM0014427;EVM0013106;EVM0016665;EVM0000400;EVM0009794;EVM0008686;EVM0008201;EVM0018861;EVM0018464;EVM0002907;EVM0001611;EVM0009363;EVM0014166;EVM0019308;EVM0024202;EVM0010611;EVM0012697;EVM0005435;EVM0018063;EVM0001421;EVM0014170;EVM0003043;EVM0003042;EVM0015081;EVM0021741;EVM0009603;EVM0021161;EVM…
GO:0050789	regulation of biological process	0.01	biological_process	EVM0021894;EVM0013628;EVM0019509;EVM0017617;EVM0010829;EVM0006914;EVM0000237;EVM0015033;EVM0008304;EVM0009160;EVM0015503;EVM0015501;EVM0003636;EVM0003985;EVM0007165;EVM0016409;EVM0014427;EVM0013106;EVM0016665;EVM0013639;EVM0000400;EVM0004520;EVM0009794;EVM0024546;EVM0008686;EVM0008201;EVM0006572;EVM0020210;EVM0018861;EVM0018464;EVM0002907;EVM0001611;EVM0016697;EVM0016059;EVM0001924;EVM0010441;EVM…
GO:0019219	regulation of nucleobase-containing compound metabolic process	0.01	biological_process	EVM0019509;EVM0006914;EVM0015033;EVM0008304;EVM0015503;EVM0003636;EVM0003985;EVM0007165;EVM0016409;EVM0014427;EVM0013106;EVM0016665;EVM0000400;EVM0009794;EVM0008686;EVM0008201;EVM0018861;EVM0018464;EVM0002907;EVM0001611;EVM0009363;EVM0014166;EVM0019308;EVM0024202;EVM0015369;EVM0010611;EVM0012697;EVM0005435;EVM0018063;EVM0001421;EVM0014170;EVM0003043;EVM0003042;EVM0015081;EVM0021741;EVM0009603;EVM…
GO:0051171	regulation of nitrogen compound metabolic process	0.01	biological_process	EVM0013628;EVM0019509;EVM0006914;EVM0015033;EVM0008304;EVM0015503;EVM0003636;EVM0003985;EVM0007165;EVM0016409;EVM0014427;EVM0013106;EVM0016665;EVM0000400;EVM0009794;EVM0008686;EVM0008201;EVM0018861;EVM0018464;EVM0002907;EVM0001611;EVM0009363;EVM0014166;EVM0019308;EVM0024202;EVM0015369;EVM0010611;EVM0012697;EVM0005435;EVM0018063;EVM0001421;EVM0014170;EVM0003043;EVM0003042;EVM0015081;EVM0021741;EVM…
GO:0031326	regulation of cellular biosynthetic process	0.01	biological_process	EVM0013628;EVM0019509;EVM0006914;EVM0015033;EVM0008304;EVM0015503;EVM0003636;EVM0003985;EVM0007165;EVM0016409;EVM0014427;EVM0013106;EVM0016665;EVM0000400;EVM0009794;EVM0008686;EVM0008201;EVM0018861;EVM0018464;EVM0002907;EVM0001611;EVM0009363;EVM0014166;EVM0019308;EVM0024202;EVM0015369;EVM0010611;EVM0012697;EVM0005435;EVM0018063;EVM0001421;EVM0014170;EVM0003043;EVM0003042;EVM0015081;EVM0021741;EVM…
GO:0008150	biological_process	0.01	biological_process	EVM0004842;EVM0021896;EVM0021894;EVM0021899;EVM0013628;EVM0019880;EVM0022317;EVM0022319;EVM0019509;EVM0017617;EVM0010829;EVM0006914;EVM0000237;EVM0015033;EVM0014031;EVM0009784;EVM0008304;EVM0009160;EVM0015503;EVM0007181;EVM0015501;EVM0003636;EVM0024130;EVM0002102;EVM0003985;EVM0003450;EVM0023029;EVM0004729;EVM0012740;EVM0012742;EVM0007360;EVM0003857;EVM0009813;EVM0007165;EVM0005101;EVM0016409;EVM…
GO:0060255	regulation of macromolecule metabolic process	0.01	biological_process	EVM0013628;EVM0019509;EVM0006914;EVM0015033;EVM0008304;EVM0015503;EVM0015501;EVM0003636;EVM0003985;EVM0007165;EVM0016409;EVM0014427;EVM0013106;EVM0016665;EVM0000400;EVM0009794;EVM0008686;EVM0008201;EVM0018861;EVM0018464;EVM0002907;EVM0001611;EVM0009363;EVM0014166;EVM0019308;EVM0024202;EVM0015369;EVM0010611;EVM0012697;EVM0005435;EVM0006039;EVM0018063;EVM0001421;EVM0014170;EVM0003043;EVM0003042;EVM…
GO:0003674	molecular_function	0.01	molecular_function	EVM0013113;EVM0004842;EVM0021896;EVM0021899;EVM0013628;EVM0019880;EVM0022317;EVM0022319;EVM0019509;EVM0017617;EVM0000237;EVM0015033;EVM0014031;EVM0009784;EVM0008304;EVM0009160;EVM0015501;EVM0003636;EVM0024130;EVM0002102;EVM0003985;EVM0004729;EVM0007360;EVM0003857;EVM0009813;EVM0007165;EVM0005101;EVM0016409;EVM0014427;EVM0013106;EVM0005586;EVM0014353;EVM0002915;EVM0016665;EVM0006011;EVM0016067;EVM…
GO:0016740	transferase activity	0.012	molecular_function	EVM0021896;EVM0013628;EVM0022317;EVM0017617;EVM0009784;EVM0007360;EVM0005101;EVM0014353;EVM0002915;EVM0024546;EVM0001748;EVM0002664;EVM0020210;EVM0018863;EVM0023861;EVM0020359;EVM0023483;EVM0016510;EVM0005686;EVM0010872;EVM0009600;EVM0024588;EVM0019121;EVM0023101;EVM0001120;EVM0001636;EVM0013664;EVM0010793;EVM0015896;EVM0003702;EVM0019929;EVM0006834;EVM0014370;EVM0014795;EVM0014551;EVM0002533;EVM…
GO:0019222	regulation of metabolic process	0.012	biological_process	EVM0013628;EVM0019509;EVM0006914;EVM0015033;EVM0008304;EVM0015503;EVM0015501;EVM0003636;EVM0003985;EVM0007165;EVM0016409;EVM0014427;EVM0013106;EVM0016665;EVM0000400;EVM0004520;EVM0009794;EVM0024546;EVM0008686;EVM0008201;EVM0018861;EVM0018464;EVM0002907;EVM0001611;EVM0009363;EVM0014166;EVM0019308;EVM0024202;EVM0015369;EVM0010611;EVM0012697;EVM0009612;EVM0005435;EVM0006039;EVM0018063;EVM0001421;EVM…
GO:0080043	quercetin 3-O-glucosyltransferase activity	0.014	molecular_function	EVM0022317;EVM0007360;EVM0002664;EVM0016510;EVM0013664;EVM0002533;EVM0017168;EVM0005207;EVM0006641;EVM0013544;EVM0008050;EVM0005247;EVM0010055
GO:0010468	regulation of gene expression	0.018	biological_process	EVM0013628;EVM0019509;EVM0006914;EVM0015033;EVM0008304;EVM0015503;EVM0015501;EVM0003636;EVM0003985;EVM0007165;EVM0016409;EVM0014427;EVM0013106;EVM0016665;EVM0000400;EVM0009794;EVM0008686;EVM0008201;EVM0018861;EVM0018464;EVM0002907;EVM0001611;EVM0009363;EVM0014166;EVM0019308;EVM0024202;EVM0010611;EVM0012697;EVM0005435;EVM0018063;EVM0001421;EVM0014170;EVM0003043;EVM0003042;EVM0003049;EVM0015081;EVM…
GO:0009889	regulation of biosynthetic process	0.018	biological_process	EVM0013628;EVM0019509;EVM0006914;EVM0015033;EVM0008304;EVM0015503;EVM0003636;EVM0003985;EVM0007165;EVM0016409;EVM0014427;EVM0013106;EVM0016665;EVM0000400;EVM0009794;EVM0008686;EVM0008201;EVM0018861;EVM0018464;EVM0002907;EVM0001611;EVM0009363;EVM0014166;EVM0019308;EVM0024202;EVM0015369;EVM0010611;EVM0012697;EVM0005435;EVM0018063;EVM0001421;EVM0014170;EVM0003043;EVM0003042;EVM0015081;EVM0021741;EVM…
GO:0080090	regulation of primary metabolic process	0.02	biological_process	EVM0013628;EVM0019509;EVM0006914;EVM0015033;EVM0008304;EVM0015503;EVM0003636;EVM0003985;EVM0007165;EVM0016409;EVM0014427;EVM0013106;EVM0016665;EVM0000400;EVM0009794;EVM0008686;EVM0008201;EVM0018861;EVM0018464;EVM0002907;EVM0001611;EVM0009363;EVM0014166;EVM0019308;EVM0024202;EVM0015369;EVM0010611;EVM0012697;EVM0009612;EVM0005435;EVM0006039;EVM0018063;EVM0001421;EVM0014170;EVM0003043;EVM0003042;EVM…
GO:0009987	cellular process	0.02	biological_process	EVM0021899;EVM0013628;EVM0019880;EVM0022319;EVM0017617;EVM0010829;EVM0014031;EVM0009784;EVM0009160;EVM0015503;EVM0007181;EVM0015501;EVM0024130;EVM0003985;EVM0023029;EVM0004729;EVM0005101;EVM0014427;EVM0014353;EVM0002915;EVM0006011;EVM0016067;EVM0009550;EVM0024546;EVM0022691;EVM0008373;EVM0001748;EVM0020321;EVM0008978;EVM0008752;EVM0008990;EVM0006572;EVM0020210;EVM0018863;EVM0005280;EVM0001611;EVM…
GO:0042221	response to chemical	0.022	biological_process	EVM0021894;EVM0019880;EVM0017617;EVM0010829;EVM0009160;EVM0003450;EVM0007165;EVM0013923;EVM0009794;EVM0008686;EVM0015751;EVM0006572;EVM0020210;EVM0016059;EVM0018283;EVM0013790;EVM0013310;EVM0003294;EVM0017833;EVM0019578;EVM0018325;EVM0012697;EVM0008747;EVM0009612;EVM0009610;EVM0003476;EVM0005435;EVM0018063;EVM0017337;EVM0001421;EVM0004143;EVM0014170;EVM0003043;EVM0003042;EVM0014771;EVM0015081;EVM…
GO:0009414	response to water deprivation	0.024	biological_process	EVM0010829;EVM0009794;EVM0013310;EVM0001421;EVM0003043;EVM0009600;EVM0009603;EVM0023101;EVM0001120;EVM0010462;EVM0003672;EVM0023117;EVM0023595;EVM0022157;EVM0003666;EVM0003065;EVM0024392;EVM0011371;EVM0006281;EVM0019155;EVM0010429;EVM0002980;EVM0022622;EVM0012726;EVM0022299;EVM0019606;EVM0013976;EVM0001547;EVM0005782;EVM0017241;EVM0009269;EVM0011708;EVM0024160
GO:0050502	cis-zeatin O-beta-D-glucosyltransferase activity	0.032	molecular_function	EVM0022317;EVM0002664;EVM0013664;EVM0017168;EVM0006641;EVM0013544;EVM0008050;EVM0010055
GO:0030246	carbohydrate binding	0.032	molecular_function	EVM0013113;EVM0003829;EVM0001209;EVM0009661;EVM0014283;EVM0020882;EVM0015707;EVM0022321
GO:0050403	trans-zeatin O-beta-D-glucosyltransferase activity	0.032	molecular_function	EVM0022317;EVM0002664;EVM0013664;EVM0017168;EVM0006641;EVM0013544;EVM0008050;EVM0010055
GO:0009415	response to water	0.034	biological_process	EVM0010829;EVM0009794;EVM0013310;EVM0001421;EVM0003043;EVM0009600;EVM0009603;EVM0023101;EVM0001120;EVM0010462;EVM0003672;EVM0023117;EVM0023595;EVM0022157;EVM0003666;EVM0003065;EVM0024392;EVM0011371;EVM0006281;EVM0019155;EVM0010429;EVM0002980;EVM0022622;EVM0012726;EVM0022299;EVM0019606;EVM0013976;EVM0001547;EVM0005782;EVM0017241;EVM0009269;EVM0011708;EVM0024160
GO:0001071	nucleic acid binding transcription factor activity	0.034	molecular_function	EVM0019509;EVM0015033;EVM0008304;EVM0003636;EVM0003985;EVM0007165;EVM0016409;EVM0013106;EVM0016665;EVM0000400;EVM0009794;EVM0008201;EVM0018861;EVM0018464;EVM0002907;EVM0009363;EVM0014166;EVM0019308;EVM0024202;EVM0010611;EVM0012697;EVM0005435;EVM0018063;EVM0014170;EVM0003043;EVM0003042;EVM0015081;EVM0021741;EVM0009603;EVM0021161;EVM0023104;EVM0000723;EVM0010319;EVM0010263;EVM0015761;EVM0012523;EVM…
GO:0035251	UDP-glucosyltransferase activity	0.034	molecular_function	EVM0022317;EVM0007360;EVM0002664;EVM0016510;EVM0013664;EVM0002533;EVM0016781;EVM0017168;EVM0005207;EVM0001693;EVM0006641;EVM0013544;EVM0018397;EVM0008050;EVM0005247;EVM0001154;EVM0021868;EVM0010055
GO:0016758	transferase activity, transferring hexosyl groups	0.04	molecular_function	EVM0021896;EVM0022317;EVM0007360;EVM0024546;EVM0002664;EVM0016510;EVM0013664;EVM0019929;EVM0002533;EVM0016781;EVM0017168;EVM0021706;EVM0005207;EVM0001693;EVM0006641;EVM0012126;EVM0001209;EVM0013544;EVM0018397;EVM0009479;EVM0008050;EVM0005782;EVM0015825;EVM0005247;EVM0006758;EVM0001154;EVM0021868;EVM0010055
GO:0003700	transcription factor activity, sequence-specific DNA binding	0.04	molecular_function	EVM0019509;EVM0015033;EVM0008304;EVM0003636;EVM0003985;EVM0007165;EVM0016409;EVM0013106;EVM0016665;EVM0000400;EVM0009794;EVM0008201;EVM0018861;EVM0018464;EVM0002907;EVM0009363;EVM0014166;EVM0019308;EVM0024202;EVM0010611;EVM0012697;EVM0005435;EVM0018063;EVM0014170;EVM0003043;EVM0003042;EVM0015081;EVM0021741;EVM0009603;EVM0021161;EVM0023104;EVM0000723;EVM0010319;EVM0010263;EVM0015761;EVM0012523;EVM…
GO:0005623	cell	0.072	cellular_component	EVM0016893;EVM0005465;EVM0013113;EVM0004842;EVM0001348;EVM0021896;EVM0013623;EVM0021899;EVM0013628;EVM0004190;EVM0002920;EVM0017274;EVM0019880;EVM0013245;EVM0022319;EVM0019509;EVM0021412;EVM0017617;EVM0000982;EVM0014997;EVM0006914;EVM0021662;EVM0000237;EVM0015033;EVM0014031;EVM0009784;EVM0007633;EVM0008304;EVM0009160;EVM0012983;EVM0023332;EVM0007181;EVM0015501;EVM0003636;EVM0024130;EVM0002102;EVM…
GO:0044464	cell part	0.072	cellular_component	EVM0016893;EVM0005465;EVM0013113;EVM0004842;EVM0001348;EVM0021896;EVM0013623;EVM0021899;EVM0013628;EVM0004190;EVM0002920;EVM0017274;EVM0019880;EVM0013245;EVM0022319;EVM0019509;EVM0021412;EVM0017617;EVM0000982;EVM0014997;EVM0006914;EVM0021662;EVM0000237;EVM0015033;EVM0014031;EVM0009784;EVM0007633;EVM0008304;EVM0009160;EVM0012983;EVM0023332;EVM0007181;EVM0015501;EVM0003636;EVM0024130;EVM0002102;EVM…
GO:0044699	single-organism process	0.08	biological_process	EVM0004842;EVM0021894;EVM0021899;EVM0019880;EVM0022317;EVM0022319;EVM0017617;EVM0010829;EVM0000237;EVM0014031;EVM0009784;EVM0009160;EVM0015503;EVM0007181;EVM0015501;EVM0003985;EVM0023029;EVM0004729;EVM0012740;EVM0003857;EVM0005101;EVM0014427;EVM0016665;EVM0006011;EVM0016067;EVM0009550;EVM0014029;EVM0024546;EVM0008686;EVM0008373;EVM0001748;EVM0020321;EVM0008978;EVM0008752;EVM0002664;EVM0006572;EVM…
GO:0007154	cell communication	0.096	biological_process	EVM0017617;EVM0010829;EVM0009160;EVM0006572;EVM0001611;EVM0009610;EVM0003043;EVM0009600;EVM0003462;EVM0023101;EVM0001120;EVM0010793;EVM0015304;EVM0023117;EVM0019929;EVM0020029;EVM0017790;EVM0014551;EVM0020367;EVM0003240;EVM0012792;EVM0014413;EVM0006281;EVM0016008;EVM0019378;EVM0015916;EVM0019155;EVM0017962;EVM0003829;EVM0007200;EVM0017825;EVM0010429;EVM0001693;EVM0002980;EVM0012708;EVM0014985;EVM…
GO:0046527	glucosyltransferase activity	0.098	molecular_function	EVM0022317;EVM0007360;EVM0002664;EVM0016510;EVM0013664;EVM0002533;EVM0016781;EVM0017168;EVM0005207;EVM0001693;EVM0006641;EVM0013544;EVM0018397;EVM0008050;EVM0005247;EVM0001154;EVM0021868;EVM0010055
GO:0004872	receptor activity	0.138	molecular_function	EVM0009160;EVM0006572;EVM0018283;EVM0003462;EVM0007200;EVM0001449;EVM0001943;EVM0017241;EVM0020503;EVM0001960;EVM0013603;EVM0021316;EVM0022327
GO:0051179	localization	0.146	biological_process	EVM0004842;EVM0021899;EVM0017617;EVM0009784;EVM0004729;EVM0016067;EVM0008373;EVM0020321;EVM0008752;EVM0004238;EVM0023313;EVM0009612;EVM0005056;EVM0016866;EVM0015172;EVM0022501;EVM0009749;EVM0021751;EVM0022157;EVM0020367;EVM0024272;EVM0012643;EVM0020708;EVM0011379;EVM0023734;EVM0008896;EVM0012251;EVM0023138;EVM0001186;EVM0005761;EVM0013058;EVM0004109;EVM0018284;EVM0011581;EVM0001510;EVM0015916;EVM…
GO:0009416	response to light stimulus	0.152	biological_process	EVM0021894;EVM0022317;EVM0015501;EVM0016409;EVM0004520;EVM0014029;EVM0002664;EVM0018861;EVM0001611;EVM0018063;EVM0003049;EVM0002020;EVM0010462;EVM0013664;EVM0015304;EVM0015306;EVM0023595;EVM0015155;EVM0007717;EVM0003065;EVM0005155;EVM0017168;EVM0020631;EVM0021706;EVM0006517;EVM0008849;EVM0020059;EVM0001672;EVM0006641;EVM0008102;EVM0005699;EVM0000626;EVM0016597;EVM0013544;EVM0009889;EVM0012871;EVM…
GO:0071702	organic substance transport	0.168	biological_process	EVM0004842;EVM0021899;EVM0004729;EVM0016067;EVM0008373;EVM0004238;EVM0023313;EVM0009612;EVM0005056;EVM0016866;EVM0015172;EVM0009749;EVM0021751;EVM0022157;EVM0024272;EVM0012643;EVM0011379;EVM0008896;EVM0012251;EVM0001186;EVM0011581;EVM0001510;EVM0019154;EVM0008067;EVM0006463;EVM0022376;EVM0018387;EVM0012722;EVM0012726;EVM0001335;EVM0020998;EVM0006895;EVM0020451;EVM0023184;EVM0016127;EVM0010713;EVM…
GO:0051234	establishment of localization	0.196	biological_process	EVM0004842;EVM0021899;EVM0017617;EVM0009784;EVM0004729;EVM0016067;EVM0008373;EVM0020321;EVM0008752;EVM0004238;EVM0023313;EVM0009612;EVM0005056;EVM0016866;EVM0015172;EVM0022501;EVM0009749;EVM0021751;EVM0022157;EVM0020367;EVM0024272;EVM0012643;EVM0020708;EVM0011379;EVM0023734;EVM0008896;EVM0012251;EVM0001186;EVM0005761;EVM0013058;EVM0004109;EVM0018284;EVM0011581;EVM0001510;EVM0019154;EVM0008067;EVM…
GO:0033993	response to lipid	0.24	biological_process	EVM0010829;EVM0009160;EVM0003450;EVM0009794;EVM0008686;EVM0015751;EVM0006572;EVM0020210;EVM0013790;EVM0003294;EVM0017833;EVM0019578;EVM0005435;EVM0001421;EVM0014170;EVM0003043;EVM0003042;EVM0014771;EVM0023104;EVM0010793;EVM0019212;EVM0003671;EVM0023117;EVM0019929;EVM0005567;EVM0019743;EVM0022157;EVM0004371;EVM0008403;EVM0023611;EVM0005155;EVM0000298;EVM0011371;EVM0002603;EVM0023416;EVM0001672;EVM…
GO:0048518	positive regulation of biological process	0.244	biological_process	EVM0021894;EVM0013628;EVM0015503;EVM0006572;EVM0020210;EVM0002907;EVM0001924;EVM0010441;EVM0010842;EVM0005435;EVM0017337;EVM0014170;EVM0003043;EVM0020029;EVM0017790;EVM0003065;EVM0012792;EVM0006619;EVM0017304;EVM0014413;EVM0016008;EVM0019378;EVM0009977;EVM0008849;EVM0020059;EVM0020836;EVM0001693;EVM0007591;EVM0012708;EVM0014985;EVM0019960;EVM0000626;EVM0016597;EVM0004242;EVM0005842;EVM0007680;EVM…
GO:0016757	transferase activity, transferring glycosyl groups	0.246	molecular_function	EVM0021896;EVM0022317;EVM0007360;EVM0024546;EVM0002664;EVM0016510;EVM0013664;EVM0019929;EVM0002533;EVM0016781;EVM0017168;EVM0021706;EVM0005207;EVM0001693;EVM0006641;EVM0012126;EVM0001209;EVM0013544;EVM0018397;EVM0009479;EVM0008050;EVM0005782;EVM0015825;EVM0005247;EVM0006758;EVM0001154;EVM0021868;EVM0002935;EVM0010055
GO:0080018	anthocyanin 5-O-glucosyltransferase activity	0.246	molecular_function	EVM0016781;EVM0018397;EVM0021868
GO:0080046	quercetin 4'-O-glucosyltransferase activity	0.308	molecular_function	EVM0022317;EVM0002664;EVM0013664;EVM0017168;EVM0006641;EVM0013544;EVM0008050;EVM0010055
GO:0006810	transport	0.318	biological_process	EVM0004842;EVM0021899;EVM0017617;EVM0009784;EVM0004729;EVM0016067;EVM0008373;EVM0020321;EVM0008752;EVM0004238;EVM0023313;EVM0009612;EVM0005056;EVM0016866;EVM0015172;EVM0022501;EVM0009749;EVM0021751;EVM0022157;EVM0020367;EVM0024272;EVM0012643;EVM0020708;EVM0011379;EVM0023734;EVM0008896;EVM0012251;EVM0001186;EVM0005761;EVM0013058;EVM0004109;EVM0018284;EVM0011581;EVM0001510;EVM0019154;EVM0008067;EVM…
GO:0005575	cellular_component	0.328	cellular_component	EVM0016893;EVM0005465;EVM0013113;EVM0004842;EVM0001348;EVM0021896;EVM0021894;EVM0013623;EVM0021899;EVM0013628;EVM0004190;EVM0002920;EVM0017274;EVM0019880;EVM0013245;EVM0022319;EVM0019509;EVM0021412;EVM0017617;EVM0000982;EVM0014997;EVM0006914;EVM0021662;EVM0000237;EVM0015033;EVM0014031;EVM0009784;EVM0007633;EVM0008304;EVM0009160;EVM0012983;EVM0023332;EVM0007181;EVM0015501;EVM0003636;EVM0024130;EVM…
GO:0006950	response to stress	0.33	biological_process	EVM0021894;EVM0013628;EVM0019880;EVM0010829;EVM0008304;EVM0007181;EVM0002102;EVM0003450;EVM0003857;EVM0014427;EVM0020681;EVM0009794;EVM0022691;EVM0002660;EVM0006572;EVM0020210;EVM0018863;EVM0018861;EVM0004888;EVM0016059;EVM0013310;EVM0003294;EVM0010840;EVM0015187;EVM0020359;EVM0008181;EVM0012697;EVM0008747;EVM0011060;EVM0017337;EVM0010657;EVM0001421;EVM0014170;EVM0021632;EVM0009802;EVM0003043;EVM…
GO:0006468	protein phosphorylation	0.336	biological_process	EVM0013628;EVM0014353;EVM0002915;EVM0018863;EVM0010872;EVM0016852;EVM0010793;EVM0006834;EVM0014370;EVM0014551;EVM0003126;EVM0021157;EVM0021708;EVM0008465;EVM0003134;EVM0007200;EVM0012610;EVM0002349;EVM0012905;EVM0016978;EVM0001449;EVM0011941;EVM0000636;EVM0013976;EVM0021023;EVM0013415;EVM0017241;EVM0016657;EVM0006935;EVM0021316;EVM0006216;EVM0016732;EVM0022327;EVM0021078
GO:0009314	response to radiation	0.35	biological_process	EVM0021894;EVM0022317;EVM0015501;EVM0016409;EVM0004520;EVM0014029;EVM0002664;EVM0018861;EVM0001611;EVM0018063;EVM0003049;EVM0002020;EVM0010462;EVM0013664;EVM0015304;EVM0015306;EVM0023595;EVM0015155;EVM0007717;EVM0003065;EVM0005155;EVM0017168;EVM0020631;EVM0021706;EVM0006517;EVM0008849;EVM0020059;EVM0001672;EVM0006641;EVM0008102;EVM0005699;EVM0000626;EVM0016597;EVM0013544;EVM0009889;EVM0012871;EVM…
GO:0051606	detection of stimulus	0.35	biological_process	EVM0019880;EVM0009610;EVM0018063;EVM0023101;EVM0007200;EVM0016597;EVM0017241;EVM0018481;EVM0023356;EVM0020314
GO:0044763	single-organism cellular process	0.42	biological_process	EVM0021899;EVM0019880;EVM0022319;EVM0017617;EVM0010829;EVM0014031;EVM0009784;EVM0009160;EVM0015503;EVM0007181;EVM0015501;EVM0003985;EVM0023029;EVM0004729;EVM0005101;EVM0014427;EVM0006011;EVM0016067;EVM0009550;EVM0024546;EVM0008373;EVM0001748;EVM0020321;EVM0008978;EVM0008752;EVM0006572;EVM0020210;EVM0005280;EVM0001611;EVM0013262;EVM0010441;EVM0017833;EVM0004158;EVM0014166;EVM0004238;EVM0023861;EVM…
GO:0009593	detection of chemical stimulus	0.422	biological_process	EVM0019880;EVM0009610;EVM0018063;EVM0023101;EVM0023356;EVM0020314
GO:0003824	catalytic activity	0.446	molecular_function	EVM0021896;EVM0013628;EVM0019880;EVM0022317;EVM0022319;EVM0017617;EVM0000237;EVM0014031;EVM0009784;EVM0015501;EVM0002102;EVM0007360;EVM0003857;EVM0009813;EVM0005101;EVM0014427;EVM0005586;EVM0014353;EVM0002915;EVM0013639;EVM0004520;EVM0009550;EVM0024546;EVM0005849;EVM0001748;EVM0008752;EVM0002664;EVM0020210;EVM0018863;EVM0005280;EVM0001615;EVM0013262;EVM0000417;EVM0004158;EVM0023861;EVM0020359;EVM…
GO:0044765	single-organism transport	0.446	biological_process	EVM0004842;EVM0021899;EVM0017617;EVM0009784;EVM0004729;EVM0016067;EVM0008373;EVM0020321;EVM0004238;EVM0023313;EVM0009612;EVM0005056;EVM0016866;EVM0015172;EVM0022501;EVM0009749;EVM0021751;EVM0022157;EVM0020367;EVM0024272;EVM0012643;EVM0020708;EVM0011379;EVM0023734;EVM0008896;EVM0012251;EVM0001186;EVM0005761;EVM0013058;EVM0004109;EVM0018284;EVM0011581;EVM0001510;EVM0019154;EVM0008067;EVM0006463;EVM…
GO:0004672	protein kinase activity	0.47	molecular_function	EVM0013628;EVM0014353;EVM0002915;EVM0018863;EVM0010872;EVM0010793;EVM0006834;EVM0014551;EVM0003126;EVM0021157;EVM0021708;EVM0008465;EVM0003134;EVM0007200;EVM0012610;EVM0002349;EVM0012905;EVM0016978;EVM0001449;EVM0011941;EVM0000636;EVM0013976;EVM0021023;EVM0013415;EVM0017241;EVM0016657;EVM0006935;EVM0021316;EVM0006216;EVM0016732;EVM0022327;EVM0021078
GO:0010628	positive regulation of gene expression	0.472	biological_process	EVM0013628;EVM0015503;EVM0002907;EVM0014170;EVM0003043;EVM0020029;EVM0003065;EVM0012792;EVM0006619;EVM0017304;EVM0014413;EVM0009977;EVM0007591;EVM0004242;EVM0005842;EVM0007680;EVM0005752;EVM0002087;EVM0009516;EVM0017525;EVM0001782;EVM0016434;EVM0001971
GO:0071214	cellular response to abiotic stimulus	0.472	biological_process	EVM0001611;EVM0001421;EVM0009600;EVM0002020;EVM0001120;EVM0010462;EVM0006281;EVM0021706;EVM0019155;EVM0010429;EVM0002980;EVM0000626;EVM0012871;EVM0001547;EVM0017241;EVM0018481;EVM0001782;EVM0001971;EVM0023031;EVM0012081
GO:0060089	molecular transducer activity	0.476	molecular_function	EVM0009160;EVM0006572;EVM0018283;EVM0003462;EVM0014551;EVM0007200;EVM0002349;EVM0001449;EVM0001943;EVM0020852;EVM0021023;EVM0017241;EVM0020503;EVM0001960;EVM0013603;EVM0021316;EVM0022327
GO:0005215	transporter activity	0.478	molecular_function	EVM0004842;EVM0021899;EVM0004729;EVM0016067;EVM0008373;EVM0020321;EVM0004238;EVM0005056;EVM0016866;EVM0015172;EVM0022501;EVM0009749;EVM0021751;EVM0022157;EVM0020367;EVM0024272;EVM0012643;EVM0020708;EVM0011379;EVM0023734;EVM0012251;EVM0001186;EVM0018284;EVM0011581;EVM0019154;EVM0008067;EVM0006463;EVM0017746;EVM0018387;EVM0012722;EVM0012726;EVM0021486;EVM0001335;EVM0000551;EVM0020998;EVM0008443;EVM…
GO:0010557	positive regulation of macromolecule biosynthetic process	0.486	biological_process	EVM0013628;EVM0015503;EVM0002907;EVM0014170;EVM0003043;EVM0020029;EVM0003065;EVM0012792;EVM0006619;EVM0017304;EVM0014413;EVM0009977;EVM0007591;EVM0004242;EVM0005842;EVM0007680;EVM0005752;EVM0002087;EVM0009516;EVM0017525;EVM0001782;EVM0016434;EVM0001971
GO:0048582	positive regulation of post-embryonic development	0.486	biological_process	EVM0020210;EVM0010441;EVM0010842;EVM0005435;EVM0017337;EVM0014413;EVM0008849;EVM0020059;EVM0014871
GO:0005622	intracellular	0.526	cellular_component	EVM0016893;EVM0013113;EVM0001348;EVM0021896;EVM0013623;EVM0021899;EVM0013628;EVM0004190;EVM0002920;EVM0017274;EVM0019880;EVM0013245;EVM0019509;EVM0021412;EVM0017617;EVM0000982;EVM0014997;EVM0006914;EVM0021662;EVM0015033;EVM0014031;EVM0009784;EVM0007633;EVM0008304;EVM0009160;EVM0012983;EVM0023332;EVM0007181;EVM0015501;EVM0003636;EVM0024130;EVM0002102;EVM0003985;EVM0023029;EVM0002928;EVM0018879;EVM…
GO:0044424	intracellular part	0.526	cellular_component	EVM0016893;EVM0013113;EVM0001348;EVM0021896;EVM0013623;EVM0021899;EVM0013628;EVM0004190;EVM0002920;EVM0017274;EVM0019880;EVM0013245;EVM0019509;EVM0021412;EVM0017617;EVM0000982;EVM0014997;EVM0006914;EVM0021662;EVM0015033;EVM0014031;EVM0009784;EVM0007633;EVM0008304;EVM0009160;EVM0012983;EVM0023332;EVM0007181;EVM0015501;EVM0003636;EVM0024130;EVM0002102;EVM0003985;EVM0023029;EVM0002928;EVM0018879;EVM…
GO:1902578	single-organism localization	0.526	biological_process	EVM0004842;EVM0021899;EVM0017617;EVM0009784;EVM0004729;EVM0016067;EVM0008373;EVM0020321;EVM0004238;EVM0023313;EVM0009612;EVM0005056;EVM0016866;EVM0015172;EVM0022501;EVM0009749;EVM0021751;EVM0022157;EVM0020367;EVM0024272;EVM0012643;EVM0020708;EVM0011379;EVM0023734;EVM0008896;EVM0012251;EVM0001186;EVM0005761;EVM0013058;EVM0004109;EVM0018284;EVM0011581;EVM0001510;EVM0019154;EVM0008067;EVM0006463;EVM…
GO:0010033	response to organic substance	0.58	biological_process	EVM0017617;EVM0010829;EVM0009160;EVM0003450;EVM0007165;EVM0009794;EVM0008686;EVM0015751;EVM0006572;EVM0020210;EVM0018283;EVM0013790;EVM0003294;EVM0017833;EVM0019578;EVM0018325;EVM0012697;EVM0008747;EVM0009612;EVM0003476;EVM0005435;EVM0018063;EVM0001421;EVM0014170;EVM0003043;EVM0003042;EVM0014771;EVM0015081;EVM0023104;EVM0005423;EVM0000723;EVM0010793;EVM0019212;EVM0015761;EVM0003671;EVM0023117;EVM…
GO:0016773	phosphotransferase activity, alcohol group as acceptor	0.58	molecular_function	EVM0013628;EVM0017617;EVM0014353;EVM0002915;EVM0001748;EVM0018863;EVM0010872;EVM0010793;EVM0006834;EVM0014551;EVM0012001;EVM0003126;EVM0021157;EVM0021708;EVM0008465;EVM0003134;EVM0007200;EVM0010428;EVM0012610;EVM0002349;EVM0012905;EVM0016978;EVM0001449;EVM0011941;EVM0005752;EVM0000636;EVM0013976;EVM0021023;EVM0013415;EVM0017241;EVM0016657;EVM0006935;EVM0021316;EVM0006216;EVM0016732;EVM0022327;EVM…
GO:0015711	organic anion transport	0.582	biological_process	EVM0021899;EVM0016067;EVM0004238;EVM0005056;EVM0015172;EVM0024272;EVM0012643;EVM0012251;EVM0008067;EVM0018387;EVM0012726;EVM0020998;EVM0020451;EVM0015079;EVM0008800
GO:0071705	nitrogen compound transport	0.584	biological_process	EVM0004842;EVM0004238;EVM0023313;EVM0009612;EVM0005056;EVM0016866;EVM0015172;EVM0009749;EVM0012643;EVM0020708;EVM0011379;EVM0008896;EVM0012251;EVM0001186;EVM0013058;EVM0011581;EVM0001510;EVM0006463;EVM0022376;EVM0012722;EVM0012726;EVM0001335;EVM0020998;EVM0006895;EVM0020451;EVM0023213;EVM0023184;EVM0010713;EVM0004323;EVM0015079;EVM0014481;EVM0020503;EVM0008022;EVM0009516;EVM0008800;EVM0005230;EVM…
GO:0045893	positive regulation of transcription, DNA-templated	0.584	biological_process	EVM0015503;EVM0002907;EVM0014170;EVM0003043;EVM0020029;EVM0003065;EVM0012792;EVM0006619;EVM0017304;EVM0014413;EVM0009977;EVM0007591;EVM0004242;EVM0007680;EVM0005752;EVM0002087;EVM0017525;EVM0001782;EVM0016434;EVM0001971
GO:1903508	positive regulation of nucleic acid-templated transcription	0.584	biological_process	EVM0015503;EVM0002907;EVM0014170;EVM0003043;EVM0020029;EVM0003065;EVM0012792;EVM0006619;EVM0017304;EVM0014413;EVM0009977;EVM0007591;EVM0004242;EVM0007680;EVM0005752;EVM0002087;EVM0017525;EVM0001782;EVM0016434;EVM0001971
GO:0010035	response to inorganic substance	0.584	biological_process	EVM0021894;EVM0019880;EVM0010829;EVM0013923;EVM0009794;EVM0016059;EVM0013310;EVM0012697;EVM0009610;EVM0017337;EVM0001421;EVM0004143;EVM0003043;EVM0003042;EVM0009600;EVM0009603;EVM0023101;EVM0001120;EVM0010462;EVM0006730;EVM0003672;EVM0023117;EVM0023595;EVM0022157;EVM0003666;EVM0003065;EVM0017547;EVM0020708;EVM0024392;EVM0005985;EVM0011371;EVM0019168;EVM0016221;EVM0006281;EVM0001266;EVM0015916;EVM…
GO:0046854	phosphatidylinositol phosphorylation	0.584	biological_process	EVM0001748;EVM0012001;EVM0005752
GO:0032106	positive regulation of response to extracellular stimulus	0.584	biological_process	EVM0019378;EVM0014985;EVM0019960
GO:0032109	positive regulation of response to nutrient levels	0.584	biological_process	EVM0019378;EVM0014985;EVM0019960
GO:0080040	positive regulation of cellular response to phosphate starvation	0.584	biological_process	EVM0019378;EVM0014985;EVM0019960
GO:0048522	positive regulation of cellular process	0.646	biological_process	EVM0021894;EVM0013628;EVM0015503;EVM0006572;EVM0002907;EVM0001924;EVM0014170;EVM0003043;EVM0020029;EVM0003065;EVM0012792;EVM0006619;EVM0017304;EVM0014413;EVM0016008;EVM0019378;EVM0009977;EVM0001693;EVM0007591;EVM0012708;EVM0014985;EVM0019960;EVM0016597;EVM0004242;EVM0005842;EVM0007680;EVM0005752;EVM0002087;EVM0012921;EVM0009516;EVM0017525;EVM0001782;EVM0016434;EVM0014270;EVM0019274;EVM0001971;EVM…
GO:0022857	transmembrane transporter activity	0.66	molecular_function	EVM0021899;EVM0004729;EVM0016067;EVM0008373;EVM0020321;EVM0004238;EVM0005056;EVM0015172;EVM0022501;EVM0009749;EVM0021751;EVM0022157;EVM0020367;EVM0024272;EVM0020708;EVM0011379;EVM0023734;EVM0012251;EVM0001186;EVM0018284;EVM0019154;EVM0008067;EVM0006463;EVM0018387;EVM0012722;EVM0012726;EVM0021486;EVM0001335;EVM0000551;EVM0020998;EVM0020451;EVM0001943;EVM0016127;EVM0010713;EVM0000309;EVM0015079;EVM…
GO:0051716	cellular response to stimulus	0.672	biological_process	EVM0017617;EVM0010829;EVM0009160;EVM0007181;EVM0006572;EVM0001611;EVM0009610;EVM0018063;EVM0001421;EVM0009802;EVM0003043;EVM0014771;EVM0009600;EVM0003462;EVM0002020;EVM0023101;EVM0001120;EVM0010462;EVM0010793;EVM0017142;EVM0015304;EVM0015761;EVM0023117;EVM0019929;EVM0020029;EVM0017790;EVM0015155;EVM0014551;EVM0020367;EVM0003240;EVM0012792;EVM0010244;EVM0014413;EVM0000298;EVM0023138;EVM0016221;EVM…
GO:0009719	response to endogenous stimulus	0.672	biological_process	EVM0010829;EVM0009160;EVM0003450;EVM0007165;EVM0009794;EVM0008686;EVM0015751;EVM0006572;EVM0020210;EVM0018283;EVM0013790;EVM0003294;EVM0017833;EVM0019578;EVM0018325;EVM0012697;EVM0008747;EVM0005435;EVM0018063;EVM0001421;EVM0014170;EVM0003043;EVM0003042;EVM0015081;EVM0023104;EVM0000723;EVM0010793;EVM0019212;EVM0015761;EVM0003671;EVM0023117;EVM0019929;EVM0020029;EVM0017790;EVM0005567;EVM0019743;EVM…
GO:0010118	stomatal movement	0.678	biological_process	EVM0017617;EVM0009603;EVM0002770;EVM0012726;EVM0022299;EVM0001943;EVM0013976;EVM0017241
GO:0022891	substrate-specific transmembrane transporter activity	0.682	molecular_function	EVM0021899;EVM0004729;EVM0016067;EVM0008373;EVM0020321;EVM0004238;EVM0005056;EVM0015172;EVM0009749;EVM0021751;EVM0022157;EVM0020367;EVM0024272;EVM0020708;EVM0011379;EVM0023734;EVM0012251;EVM0001186;EVM0019154;EVM0008067;EVM0006463;EVM0018387;EVM0012722;EVM0021486;EVM0001335;EVM0000551;EVM0020998;EVM0020451;EVM0001943;EVM0016127;EVM0010713;EVM0000309;EVM0015079;EVM0021201;EVM0014481;EVM0008022;EVM…
GO:0005337	nucleoside transmembrane transporter activity	0.686	molecular_function	EVM0004238;EVM0011379;EVM0012251;EVM0006463;EVM0008800
GO:0009737	response to abscisic acid	0.712	biological_process	EVM0010829;EVM0009160;EVM0003450;EVM0009794;EVM0015751;EVM0006572;EVM0020210;EVM0013790;EVM0003294;EVM0017833;EVM0019578;EVM0005435;EVM0001421;EVM0014170;EVM0003043;EVM0003042;EVM0019212;EVM0003671;EVM0023117;EVM0005567;EVM0019743;EVM0022157;EVM0023611;EVM0005155;EVM0011371;EVM0002603;EVM0023416;EVM0010429;EVM0000038;EVM0022622;EVM0001841;EVM0022299;EVM0013976;EVM0013360;EVM0009269;EVM0015396;EVM…
GO:0006464	cellular protein modification process	0.712	biological_process	EVM0013628;EVM0014353;EVM0002915;EVM0018863;EVM0010441;EVM0023483;EVM0005686;EVM0010872;EVM0024588;EVM0023292;EVM0023101;EVM0022853;EVM0016852;EVM0001636;EVM0010793;EVM0006834;EVM0014370;EVM0014551;EVM0008403;EVM0001876;EVM0003126;EVM0021157;EVM0004637;EVM0021708;EVM0008465;EVM0003134;EVM0007200;EVM0020836;EVM0001693;EVM0022376;EVM0011480;EVM0012610;EVM0002349;EVM0012905;EVM0023087;EVM0017355;EVM…
GO:0036211	protein modification process	0.712	biological_process	EVM0013628;EVM0014353;EVM0002915;EVM0018863;EVM0010441;EVM0023483;EVM0005686;EVM0010872;EVM0024588;EVM0023292;EVM0023101;EVM0022853;EVM0016852;EVM0001636;EVM0010793;EVM0006834;EVM0014370;EVM0014551;EVM0008403;EVM0001876;EVM0003126;EVM0021157;EVM0004637;EVM0021708;EVM0008465;EVM0003134;EVM0007200;EVM0020836;EVM0001693;EVM0022376;EVM0011480;EVM0012610;EVM0002349;EVM0012905;EVM0023087;EVM0017355;EVM…
GO:0016301	kinase activity	0.718	molecular_function	EVM0013628;EVM0017617;EVM0014353;EVM0002915;EVM0001748;EVM0018863;EVM0010872;EVM0010793;EVM0015896;EVM0006834;EVM0014370;EVM0014795;EVM0014551;EVM0012001;EVM0003126;EVM0021157;EVM0021708;EVM0008465;EVM0003134;EVM0007200;EVM0010428;EVM0012610;EVM0002349;EVM0012905;EVM0016978;EVM0001449;EVM0011941;EVM0005752;EVM0000636;EVM0013976;EVM0021023;EVM0013415;EVM0017241;EVM0016657;EVM0006935;EVM0021316;EVM…
GO:0022892	substrate-specific transporter activity	0.736	molecular_function	EVM0004842;EVM0021899;EVM0004729;EVM0016067;EVM0008373;EVM0020321;EVM0004238;EVM0005056;EVM0016866;EVM0015172;EVM0009749;EVM0021751;EVM0022157;EVM0020367;EVM0024272;EVM0020708;EVM0011379;EVM0023734;EVM0012251;EVM0001186;EVM0011581;EVM0019154;EVM0008067;EVM0006463;EVM0018387;EVM0012722;EVM0021486;EVM0001335;EVM0000551;EVM0020998;EVM0020451;EVM0001943;EVM0016127;EVM0010713;EVM0000309;EVM0015079;EVM…
GO:0097305	response to alcohol	0.752	biological_process	EVM0010829;EVM0009160;EVM0003450;EVM0009794;EVM0015751;EVM0006572;EVM0020210;EVM0013790;EVM0003294;EVM0017833;EVM0019578;EVM0005435;EVM0001421;EVM0014170;EVM0003043;EVM0003042;EVM0010793;EVM0019212;EVM0003671;EVM0023117;EVM0005567;EVM0019743;EVM0022157;EVM0004371;EVM0008403;EVM0023611;EVM0005155;EVM0011371;EVM0002603;EVM0023416;EVM0001672;EVM0010429;EVM0000038;EVM0022622;EVM0001841;EVM0022299;EVM…
GO:0006796	phosphate-containing compound metabolic process	0.782	biological_process	EVM0013628;EVM0019880;EVM0022319;EVM0017617;EVM0015501;EVM0014353;EVM0002915;EVM0001748;EVM0008752;EVM0018863;EVM0009612;EVM0002332;EVM0011944;EVM0010872;EVM0022501;EVM0023292;EVM0016852;EVM0010793;EVM0015896;EVM0015304;EVM0015155;EVM0006834;EVM0014370;EVM0009289;EVM0014795;EVM0014551;EVM0020367;EVM0012001;EVM0003126;EVM0023734;EVM0021157;EVM0021708;EVM0008465;EVM0003134;EVM0012484;EVM0021122;EVM…
GO:0008514	organic anion transmembrane transporter activity	0.782	molecular_function	EVM0021899;EVM0016067;EVM0004238;EVM0005056;EVM0015172;EVM0024272;EVM0012251;EVM0018387;EVM0020998;EVM0020451;EVM0000309;EVM0015079;EVM0008800
GO:2000243	positive regulation of reproductive process	0.788	biological_process	EVM0001924;EVM0010441;EVM0010842;EVM0005435;EVM0014413;EVM0008849;EVM0020059;EVM0014871
GO:0016597	amino acid binding	0.788	molecular_function	EVM0009600;EVM0001120;EVM0006281;EVM0019155;EVM0019713;EVM0002980;EVM0006895;EVM0001547
GO:0005886	plasma membrane	0.816	cellular_component	EVM0005465;EVM0004842;EVM0019880;EVM0013245;EVM0022319;EVM0000237;EVM0015033;EVM0007181;EVM0006583;EVM0004729;EVM0016081;EVM0022869;EVM0005589;EVM0002915;EVM0006011;EVM0013923;EVM0009481;EVM0009550;EVM0018266;EVM0014022;EVM0008373;EVM0023909;EVM0003624;EVM0020321;EVM0008971;EVM0008752;EVM0018863;EVM0004888;EVM0019578;EVM0021645;EVM0003611;EVM0009610;EVM0023483;EVM0005056;EVM0016866;EVM0020918;EVM…
GO:0016310	phosphorylation	0.822	biological_process	EVM0013628;EVM0017617;EVM0014353;EVM0002915;EVM0001748;EVM0018863;EVM0010872;EVM0016852;EVM0010793;EVM0015896;EVM0006834;EVM0014370;EVM0014795;EVM0014551;EVM0012001;EVM0003126;EVM0021157;EVM0021708;EVM0008465;EVM0003134;EVM0007200;EVM0010428;EVM0012610;EVM0002349;EVM0012905;EVM0016978;EVM0001449;EVM0011941;EVM0005752;EVM0000636;EVM0013976;EVM0021023;EVM0013415;EVM0017241;EVM0016657;EVM0006935;EVM…
GO:0031328	positive regulation of cellular biosynthetic process	0.822	biological_process	EVM0013628;EVM0015503;EVM0002907;EVM0014170;EVM0003043;EVM0020029;EVM0003065;EVM0012792;EVM0006619;EVM0017304;EVM0014413;EVM0009977;EVM0007591;EVM0004242;EVM0005842;EVM0007680;EVM0005752;EVM0002087;EVM0009516;EVM0017525;EVM0001782;EVM0016434;EVM0001971
GO:0009891	positive regulation of biosynthetic process	0.826	biological_process	EVM0013628;EVM0015503;EVM0002907;EVM0014170;EVM0003043;EVM0020029;EVM0003065;EVM0012792;EVM0006619;EVM0017304;EVM0014413;EVM0009977;EVM0007591;EVM0004242;EVM0005842;EVM0007680;EVM0005752;EVM0002087;EVM0009516;EVM0017525;EVM0001782;EVM0016434;EVM0001971
GO:1902680	positive regulation of RNA biosynthetic process	0.83	biological_process	EVM0015503;EVM0002907;EVM0014170;EVM0003043;EVM0020029;EVM0003065;EVM0012792;EVM0006619;EVM0017304;EVM0014413;EVM0009977;EVM0007591;EVM0004242;EVM0007680;EVM0005752;EVM0002087;EVM0017525;EVM0001782;EVM0016434;EVM0001971
GO:0051254	positive regulation of RNA metabolic process	0.83	biological_process	EVM0015503;EVM0002907;EVM0014170;EVM0003043;EVM0020029;EVM0003065;EVM0012792;EVM0006619;EVM0017304;EVM0014413;EVM0009977;EVM0007591;EVM0004242;EVM0007680;EVM0005752;EVM0002087;EVM0017525;EVM0001782;EVM0016434;EVM0001971
GO:0015858	nucleoside transport	0.83	biological_process	EVM0004238;EVM0011379;EVM0012251;EVM0006463;EVM0008800
GO:0009815	1-aminocyclopropane-1-carboxylate oxidase activity	0.83	molecular_function	EVM0005730;EVM0000298;EVM0010934
GO:0071398	cellular response to fatty acid	0.83	biological_process	EVM0014771;EVM0000298;EVM0010934
GO:0009640	photomorphogenesis	0.878	biological_process	EVM0015501;EVM0018861;EVM0003049;EVM0007717;EVM0000626;EVM0020852;EVM0017241;EVM0018481
GO:0051240	positive regulation of multicellular organismal process	0.88	biological_process	EVM0020210;EVM0010441;EVM0010842;EVM0005435;EVM0017337;EVM0014413;EVM0008849;EVM0020059;EVM0005752;EVM0014871
GO:0046777	protein autophosphorylation	0.9	biological_process	EVM0014353;EVM0018863;EVM0010793;EVM0014370;EVM0003126;EVM0021157;EVM0008465;EVM0012610;EVM0012905;EVM0000636;EVM0013415;EVM0017241;EVM0016657;EVM0006935;EVM0016732;EVM0021078
GO:0051173	positive regulation of nitrogen compound metabolic process	0.9	biological_process	EVM0013628;EVM0015503;EVM0002907;EVM0014170;EVM0003043;EVM0020029;EVM0003065;EVM0012792;EVM0006619;EVM0017304;EVM0014413;EVM0009977;EVM0007591;EVM0004242;EVM0005842;EVM0007680;EVM0005752;EVM0002087;EVM0009516;EVM0017525;EVM0001782;EVM0016434;EVM0001971
GO:0055085	transmembrane transport	0.91	biological_process	EVM0021899;EVM0004729;EVM0016067;EVM0008373;EVM0020321;EVM0004238;EVM0023313;EVM0005056;EVM0015172;EVM0022501;EVM0009749;EVM0021751;EVM0022157;EVM0020367;EVM0024272;EVM0020708;EVM0011379;EVM0023734;EVM0012251;EVM0001186;EVM0018284;EVM0019154;EVM0008067;EVM0006463;EVM0018387;EVM0012722;EVM0012726;EVM0021486;EVM0001335;EVM0000551;EVM0020998;EVM0022299;EVM0020451;EVM0001943;EVM0016127;EVM0010713;EVM…
GO:0099600	transmembrane receptor activity	0.91	molecular_function	EVM0003462;EVM0007200;EVM0001449;EVM0001943;EVM0020503;EVM0001960;EVM0013603;EVM0021316
GO:0038023	signaling receptor activity	0.91	molecular_function	EVM0003462;EVM0007200;EVM0001449;EVM0017241;EVM0020503;EVM0001960;EVM0021316;EVM0022327
GO:0016036	cellular response to phosphate starvation	0.916	biological_process	EVM0023101;EVM0019378;EVM0015916;EVM0017962;EVM0017825;EVM0014985;EVM0019960;EVM0012160;EVM0011478
GO:2000242	negative regulation of reproductive process	0.916	biological_process	EVM0008686;EVM0016059;EVM0023101;EVM0015304;EVM0008403;EVM0001672;EVM0005203;EVM0011480;EVM0017355
GO:0006793	phosphorus metabolic process	0.918	biological_process	EVM0013628;EVM0019880;EVM0022319;EVM0017617;EVM0015501;EVM0014353;EVM0002915;EVM0001748;EVM0008752;EVM0018863;EVM0009612;EVM0002332;EVM0011944;EVM0010872;EVM0022501;EVM0023292;EVM0016852;EVM0010793;EVM0015896;EVM0015304;EVM0015155;EVM0006834;EVM0014370;EVM0009289;EVM0014795;EVM0014551;EVM0020367;EVM0012001;EVM0003126;EVM0023734;EVM0021157;EVM0021708;EVM0008465;EVM0003134;EVM0012484;EVM0021122;EVM…
GO:0046467	membrane lipid biosynthetic process	0.92	biological_process	EVM0024546;EVM0007717;EVM0012126;EVM0006758;EVM0002935
GO:0008152	metabolic process	0.928	biological_process	EVM0021896;EVM0013628;EVM0019880;EVM0022317;EVM0022319;EVM0017617;EVM0000237;EVM0014031;EVM0009784;EVM0015501;EVM0024130;EVM0002102;EVM0007360;EVM0003857;EVM0009813;EVM0005101;EVM0014427;EVM0005586;EVM0014353;EVM0002915;EVM0006011;EVM0013639;EVM0004520;EVM0009550;EVM0024546;EVM0022691;EVM0005849;EVM0001748;EVM0008978;EVM0008752;EVM0002664;EVM0008990;EVM0020210;EVM0018863;EVM0005280;EVM0001615;EVM…
GO:0051554	flavonol metabolic process	0.93	biological_process	EVM0022317;EVM0002664;EVM0013664;EVM0017168;EVM0006641;EVM0013544;EVM0008050;EVM0010055
GO:0051555	flavonol biosynthetic process	0.93	biological_process	EVM0022317;EVM0002664;EVM0013664;EVM0017168;EVM0006641;EVM0013544;EVM0008050;EVM0010055
GO:0016772	transferase activity, transferring phosphorus-containing groups	0.934	molecular_function	EVM0013628;EVM0017617;EVM0005101;EVM0014353;EVM0002915;EVM0001748;EVM0018863;EVM0010872;EVM0010793;EVM0015896;EVM0006834;EVM0014370;EVM0014795;EVM0014551;EVM0012001;EVM0003126;EVM0021157;EVM0021708;EVM0008465;EVM0003134;EVM0007200;EVM0010428;EVM0020836;EVM0012610;EVM0002349;EVM0012905;EVM0001841;EVM0016978;EVM0001449;EVM0024238;EVM0011941;EVM0005752;EVM0000636;EVM0013976;EVM0021023;EVM0013415;EVM…
GO:0006970	response to osmotic stress	0.936	biological_process	EVM0013628;EVM0019880;EVM0010829;EVM0002102;EVM0003450;EVM0014427;EVM0009794;EVM0022691;EVM0020210;EVM0018861;EVM0003294;EVM0012697;EVM0001421;EVM0003042;EVM0003671;EVM0023117;EVM0005567;EVM0022157;EVM0003666;EVM0003240;EVM0024392;EVM0011371;EVM0015916;EVM0003134;EVM0008064;EVM0023416;EVM0000038;EVM0015124;EVM0022622;EVM0020998;EVM0022299;EVM0006134;EVM0013976;EVM0013360;EVM0021449;EVM0015396;EVM…
GO:0071496	cellular response to external stimulus	0.936	biological_process	EVM0009600;EVM0023101;EVM0001120;EVM0003240;EVM0014413;EVM0006281;EVM0019378;EVM0015916;EVM0019155;EVM0017962;EVM0017825;EVM0010429;EVM0002980;EVM0014985;EVM0019960;EVM0001547;EVM0021201;EVM0012160;EVM0011478
GO:0031668	cellular response to extracellular stimulus	0.936	biological_process	EVM0009600;EVM0023101;EVM0001120;EVM0003240;EVM0014413;EVM0006281;EVM0019378;EVM0015916;EVM0019155;EVM0017962;EVM0017825;EVM0010429;EVM0002980;EVM0014985;EVM0019960;EVM0001547;EVM0021201;EVM0012160;EVM0011478
GO:0051094	positive regulation of developmental process	0.936	biological_process	EVM0020210;EVM0010441;EVM0010842;EVM0005435;EVM0017337;EVM0014413;EVM0008849;EVM0020059;EVM0005752;EVM0014871
GO:0043177	organic acid binding	0.938	molecular_function	EVM0009160;EVM0006572;EVM0009600;EVM0001120;EVM0006281;EVM0019155;EVM0003829;EVM0019713;EVM0002980;EVM0006895;EVM0001547
GO:0031406	carboxylic acid binding	0.938	molecular_function	EVM0009160;EVM0006572;EVM0009600;EVM0001120;EVM0006281;EVM0019155;EVM0003829;EVM0019713;EVM0002980;EVM0006895;EVM0001547
GO:1901642	nucleoside transmembrane transport	0.94	biological_process	EVM0004238;EVM0012251;EVM0006463;EVM0008800
GO:0015860	purine nucleoside transmembrane transport	0.94	biological_process	EVM0004238;EVM0012251;EVM0006463;EVM0008800
GO:0015211	purine nucleoside transmembrane transporter activity	0.94	molecular_function	EVM0004238;EVM0012251;EVM0006463;EVM0008800
GO:2000030	regulation of response to red or far red light	0.95	biological_process	EVM0006914;EVM0009600;EVM0001120;EVM0001124;EVM0006281;EVM0019155;EVM0002980;EVM0001547;EVM0020314
GO:0044712	single-organism catabolic process	0.956	biological_process	EVM0017617;EVM0015501;EVM0008752;EVM0005280;EVM0004238;EVM0009612;EVM0002332;EVM0017337;EVM0010657;EVM0022501;EVM0009600;EVM0001120;EVM0015304;EVM0006730;EVM0001134;EVM0015155;EVM0009289;EVM0020367;EVM0024272;EVM0023734;EVM0006281;EVM0012484;EVM0019155;EVM0001078;EVM0020836;EVM0002980;EVM0000036;EVM0012726;EVM0008102;EVM0016597;EVM0001209;EVM0009661;EVM0005842;EVM0001547;EVM0008555;EVM0008022;EVM…
GO:0043412	macromolecule modification	0.956	biological_process	EVM0013628;EVM0014353;EVM0002915;EVM0018863;EVM0010441;EVM0023483;EVM0005686;EVM0010872;EVM0024588;EVM0023292;EVM0023101;EVM0022853;EVM0016852;EVM0001636;EVM0010793;EVM0006834;EVM0014370;EVM0014551;EVM0008403;EVM0001876;EVM0003126;EVM0021157;EVM0004637;EVM0021708;EVM0008465;EVM0003134;EVM0007200;EVM0020836;EVM0001693;EVM0022376;EVM0011480;EVM0012610;EVM0002349;EVM0012905;EVM0005699;EVM0023087;EVM…
GO:0009725	response to hormone	0.96	biological_process	EVM0010829;EVM0009160;EVM0003450;EVM0007165;EVM0009794;EVM0008686;EVM0015751;EVM0006572;EVM0020210;EVM0018283;EVM0013790;EVM0003294;EVM0017833;EVM0019578;EVM0018325;EVM0012697;EVM0008747;EVM0005435;EVM0018063;EVM0001421;EVM0014170;EVM0003043;EVM0003042;EVM0015081;EVM0023104;EVM0010793;EVM0019212;EVM0003671;EVM0023117;EVM0019929;EVM0017790;EVM0005567;EVM0019743;EVM0022157;EVM0004371;EVM0008403;EVM…
GO:0031324	negative regulation of cellular metabolic process	0.96	biological_process	EVM0006914;EVM0014427;EVM0004520;EVM0001611;EVM0005435;EVM0006039;EVM0001124;EVM0015304;EVM0005567;EVM0015155;EVM0004371;EVM0020033;EVM0023138;EVM0001672;EVM0017355;EVM0009661;EVM0005842;EVM0005752;EVM0014852;EVM0008005;EVM0008555;EVM0017661;EVM0009452;EVM0023829;EVM0001971;EVM0022257
GO:0044700	single organism signaling	0.96	biological_process	EVM0017617;EVM0010829;EVM0009160;EVM0006572;EVM0001611;EVM0009610;EVM0003043;EVM0003462;EVM0010793;EVM0015304;EVM0023117;EVM0019929;EVM0020029;EVM0017790;EVM0014551;EVM0020367;EVM0012792;EVM0016008;EVM0003829;EVM0007200;EVM0001693;EVM0012708;EVM0002349;EVM0020197;EVM0000626;EVM0016597;EVM0001449;EVM0022299;EVM0004242;EVM0006895;EVM0005842;EVM0007683;EVM0020852;EVM0013976;EVM0021023;EVM0012921;EVM…
GO:0052742	phosphatidylinositol kinase activity	0.96	molecular_function	EVM0001748;EVM0005752
GO:0071545	inositol phosphate catabolic process	0.96	biological_process	EVM0021860;EVM0000683
GO:0010487	thermospermine synthase activity	0.96	molecular_function	EVM0009784;EVM0019677
GO:0046855	inositol phosphate dephosphorylation	0.96	biological_process	EVM0021860;EVM0000683
GO:0046838	phosphorylated carbohydrate dephosphorylation	0.96	biological_process	EVM0021860;EVM0000683
GO:0015866	ADP transport	0.96	biological_process	EVM0004238;EVM0008800
GO:1905177	tracheary element differentiation	0.96	biological_process	EVM0009784;EVM0019677
GO:0048759	xylem vessel member cell differentiation	0.96	biological_process	EVM0009784;EVM0019677
GO:0048439	flower morphogenesis	0.96	biological_process	EVM0017790;EVM0020033
GO:0032103	positive regulation of response to external stimulus	0.994	biological_process	EVM0019378;EVM0014985;EVM0019960
GO:0046942	carboxylic acid transport	0.996	biological_process	EVM0021899;EVM0016067;EVM0005056;EVM0015172;EVM0024272;EVM0008067;EVM0018387;EVM0012726;EVM0020998;EVM0020451;EVM0015079
GO:0015849	organic acid transport	0.996	biological_process	EVM0021899;EVM0016067;EVM0005056;EVM0015172;EVM0024272;EVM0008067;EVM0018387;EVM0012726;EVM0020998;EVM0020451;EVM0015079
GO:0043231	intracellular membrane-bounded organelle	0.998	cellular_component	EVM0016893;EVM0013113;EVM0001348;EVM0021896;EVM0021899;EVM0013628;EVM0004190;EVM0002920;EVM0013245;EVM0019509;EVM0021412;EVM0017617;EVM0000982;EVM0014997;EVM0006914;EVM0021662;EVM0015033;EVM0014031;EVM0007633;EVM0008304;EVM0009160;EVM0012983;EVM0023332;EVM0015501;EVM0003636;EVM0024130;EVM0002102;EVM0003985;EVM0023029;EVM0007165;EVM0005290;EVM0005101;EVM0016409;EVM0014427;EVM0013106;EVM0005586;EVM…
GO:0048580	regulation of post-embryonic development	0.998	biological_process	EVM0010829;EVM0006914;EVM0013639;EVM0008686;EVM0020210;EVM0016697;EVM0016059;EVM0010441;EVM0010842;EVM0005435;EVM0017337;EVM0024588;EVM0023101;EVM0001124;EVM0008403;EVM0014413;EVM0008849;EVM0020059;EVM0001672;EVM0005203;EVM0011480;EVM0022622;EVM0017355;EVM0014871;EVM0020314
GO:0048583	regulation of response to stimulus	0.998	biological_process	EVM0006914;EVM0009794;EVM0006572;EVM0009600;EVM0003462;EVM0023101;EVM0001120;EVM0001124;EVM0019929;EVM0020029;EVM0017790;EVM0008403;EVM0020367;EVM0024062;EVM0006281;EVM0019378;EVM0019155;EVM0020059;EVM0005203;EVM0001693;EVM0002980;EVM0014985;EVM0019960;EVM0004242;EVM0009661;EVM0007683;EVM0001547;EVM0012921;EVM0015396;EVM0014270;EVM0020314;EVM0006216;EVM0001971;EVM0022327;EVM0021078
GO:0090068	positive regulation of cell cycle process	0.998	biological_process	EVM0001924;EVM0016008;EVM0012708;EVM0001971
GO:0051552	flavone metabolic process	0.998	biological_process	EVM0022317;EVM0002664;EVM0013664;EVM0017168;EVM0006641;EVM0013544;EVM0008050;EVM0010055
GO:0051553	flavone biosynthetic process	0.998	biological_process	EVM0022317;EVM0002664;EVM0013664;EVM0017168;EVM0006641;EVM0013544;EVM0008050;EVM0010055
GO:0043227	membrane-bounded organelle	0.998	cellular_component	EVM0016893;EVM0013113;EVM0001348;EVM0021896;EVM0021899;EVM0013628;EVM0004190;EVM0002920;EVM0013245;EVM0019509;EVM0021412;EVM0017617;EVM0000982;EVM0014997;EVM0006914;EVM0021662;EVM0015033;EVM0014031;EVM0007633;EVM0008304;EVM0009160;EVM0012983;EVM0023332;EVM0015501;EVM0003636;EVM0024130;EVM0002102;EVM0003985;EVM0023029;EVM0007165;EVM0005290;EVM0005101;EVM0016409;EVM0014427;EVM0013106;EVM0005586;EVM…
GO:0023052	signaling	0.998	biological_process	EVM0017617;EVM0010829;EVM0009160;EVM0006572;EVM0001611;EVM0009610;EVM0003043;EVM0003462;EVM0010793;EVM0015304;EVM0023117;EVM0019929;EVM0020029;EVM0017790;EVM0014551;EVM0020367;EVM0012792;EVM0016008;EVM0003829;EVM0007200;EVM0001693;EVM0012708;EVM0002349;EVM0020197;EVM0000626;EVM0016597;EVM0001449;EVM0022299;EVM0004242;EVM0006895;EVM0005842;EVM0007683;EVM0020852;EVM0013976;EVM0021023;EVM0012921;EVM…
GO:0042752	regulation of circadian rhythm	0.998	biological_process	EVM0020059;EVM0002649;EVM0016434;EVM0013283;EVM0002305;EVM0023780
GO:0010286	heat acclimation	0.998	biological_process	EVM0004888;EVM0014170;EVM0020582;EVM0023101;EVM0022622;EVM0009889
GO:0004364	glutathione transferase activity	0.998	molecular_function	EVM0009600;EVM0001120;EVM0006281;EVM0019155;EVM0002980;EVM0001547
GO:0007623	circadian rhythm	0.998	biological_process	EVM0015501;EVM0013639;EVM0001611;EVM0020059;EVM0005203;EVM0006895;EVM0001943;EVM0017241;EVM0022797;EVM0023780
GO:0048511	rhythmic process	0.998	biological_process	EVM0015501;EVM0013639;EVM0001611;EVM0020059;EVM0005203;EVM0006895;EVM0001943;EVM0017241;EVM0022797;EVM0023780
GO:0009991	response to extracellular stimulus	0.998	biological_process	EVM0009600;EVM0023101;EVM0001120;EVM0003240;EVM0014413;EVM0006281;EVM0019378;EVM0015916;EVM0019155;EVM0017962;EVM0017825;EVM0010429;EVM0002980;EVM0014985;EVM0019960;EVM0001547;EVM0021201;EVM0012160;EVM0021860;EVM0011478
GO:0006820	anion transport	0.998	biological_process	EVM0021899;EVM0016067;EVM0004238;EVM0005056;EVM0015172;EVM0024272;EVM0012643;EVM0020708;EVM0012251;EVM0013058;EVM0008067;EVM0018387;EVM0012726;EVM0020998;EVM0020451;EVM0023213;EVM0015079;EVM0021201;EVM0008800;EVM0004279
GO:0071229	cellular response to acid chemical	0.998	biological_process	EVM0010829;EVM0009160;EVM0006572;EVM0003043;EVM0014771;EVM0009600;EVM0001120;EVM0023117;EVM0019929;EVM0020029;EVM0017790;EVM0000298;EVM0006281;EVM0019155;EVM0010429;EVM0002980;EVM0000626;EVM0022299;EVM0004242;EVM0007683;EVM0013976;EVM0001547;EVM0012921;EVM0001960;EVM0013283;EVM0010934;EVM0006216
GO:0052689	carboxylic ester hydrolase activity	0.998	molecular_function	EVM0009813;EVM0005849;EVM0001615;EVM0001615;EVM0004158;EVM0004158;EVM0007586;EVM0007586;EVM0000036;EVM0022917;EVM0022917
GO:0015672	monovalent inorganic cation transport	0.998	biological_process	EVM0016067;EVM0020321;EVM0021751;EVM0022157;EVM0013058;EVM0022299;EVM0023213;EVM0001943;EVM0013603;EVM0005301;EVM0012081
GO:0045935	positive regulation of nucleobase-containing compound metabolic process	0.998	biological_process	EVM0015503;EVM0002907;EVM0014170;EVM0003043;EVM0020029;EVM0003065;EVM0012792;EVM0006619;EVM0017304;EVM0014413;EVM0009977;EVM0007591;EVM0004242;EVM0007680;EVM0005752;EVM0002087;EVM0017525;EVM0001782;EVM0016434;EVM0001971
GO:0009789	positive regulation of abscisic acid-activated signaling pathway	1	biological_process	EVM0006572;EVM0004242;EVM0014270;EVM0021078
GO:1905959	positive regulation of cellular response to alcohol	1	biological_process	EVM0006572;EVM0004242;EVM0014270;EVM0021078
GO:0046943	carboxylic acid transmembrane transporter activity	1	molecular_function	EVM0021899;EVM0016067;EVM0005056;EVM0015172;EVM0024272;EVM0018387;EVM0020998;EVM0020451;EVM0015079
GO:0005342	organic acid transmembrane transporter activity	1	molecular_function	EVM0021899;EVM0016067;EVM0005056;EVM0015172;EVM0024272;EVM0018387;EVM0020998;EVM0020451;EVM0015079
GO:0072331	signal transduction by p53 class mediator	1	biological_process	EVM0015304;EVM0016008;EVM0012708
GO:1902806	regulation of cell cycle G1/S phase transition	1	biological_process	EVM0016008;EVM0012708;EVM0001971
GO:0046834	lipid phosphorylation	1	biological_process	EVM0001748;EVM0012001;EVM0005752
GO:2000045	regulation of G1/S transition of mitotic cell cycle	1	biological_process	EVM0016008;EVM0012708;EVM0001971
GO:0005513	detection of calcium ion	1	biological_process	EVM0019880;EVM0009610;EVM0020314
GO:0004176	ATP-dependent peptidase activity	1	molecular_function	EVM0009612;EVM0012484;EVM0009443
GO:0009266	response to temperature stimulus	1	biological_process	EVM0021894;EVM0013628;EVM0003450;EVM0014427;EVM0020210;EVM0001611;EVM0004888;EVM0013310;EVM0003294;EVM0001421;EVM0014170;EVM0021632;EVM0020582;EVM0023101;EVM0017142;EVM0015761;EVM0023117;EVM0020029;EVM0003240;EVM0024392;EVM0011371;EVM0016221;EVM0019378;EVM0002770;EVM0020059;EVM0001078;EVM0010429;EVM0000038;EVM0014985;EVM0015124;EVM0011391;EVM0022622;EVM0019960;EVM0011763;EVM0009889;EVM0022299;EVM…
GO:1901505	carbohydrate derivative transporter activity	1	molecular_function	EVM0021899;EVM0004238;EVM0011379;EVM0012251;EVM0006463;EVM0018387;EVM0000309;EVM0008800
GO:0009409	response to cold	1	biological_process	EVM0013628;EVM0003450;EVM0014427;EVM0020210;EVM0013310;EVM0003294;EVM0001421;EVM0021632;EVM0023101;EVM0017142;EVM0015761;EVM0023117;EVM0003240;EVM0024392;EVM0011371;EVM0016221;EVM0019378;EVM0002770;EVM0020059;EVM0001078;EVM0010429;EVM0000038;EVM0014985;EVM0015124;EVM0022622;EVM0019960;EVM0011763;EVM0022299;EVM0002087;EVM0024160
GO:1901615	organic hydroxy compound metabolic process	1	biological_process	EVM0022317;EVM0002664;EVM0013664;EVM0015306;EVM0003702;EVM0003666;EVM0017168;EVM0020631;EVM0021122;EVM0008849;EVM0006641;EVM0013544;EVM0006895;EVM0019606;EVM0008050;EVM0017661;EVM0017460;EVM0021860;EVM0000683;EVM0010055
GO:0009651	response to salt stress	1	biological_process	EVM0013628;EVM0019880;EVM0010829;EVM0002102;EVM0003450;EVM0014427;EVM0009794;EVM0022691;EVM0020210;EVM0018861;EVM0003294;EVM0012697;EVM0001421;EVM0003042;EVM0003671;EVM0023117;EVM0005567;EVM0022157;EVM0003666;EVM0003240;EVM0024392;EVM0011371;EVM0015916;EVM0003134;EVM0008064;EVM0023416;EVM0000038;EVM0015124;EVM0022299;EVM0006134;EVM0013976;EVM0013360;EVM0021449;EVM0024160;EVM0017525;EVM0016434;EVM…
GO:0009791	post-embryonic development	1	biological_process	EVM0021894;EVM0010829;EVM0000237;EVM0015501;EVM0016665;EVM0008686;EVM0008752;EVM0020210;EVM0018863;EVM0018861;EVM0016697;EVM0016059;EVM0010441;EVM0014166;EVM0004238;EVM0005435;EVM0005686;EVM0017337;EVM0003049;EVM0003461;EVM0010793;EVM0015306;EVM0019212;EVM0012523;EVM0017790;EVM0009289;EVM0003666;EVM0007717;EVM0024498;EVM0020033;EVM0000678;EVM0017160;EVM0020631;EVM0024392;EVM0014635;EVM0008896;EVM…
GO:0044767	single-organism developmental process	1	biological_process	EVM0021894;EVM0010829;EVM0000237;EVM0009784;EVM0015501;EVM0012740;EVM0003857;EVM0016665;EVM0009550;EVM0014029;EVM0008686;EVM0001748;EVM0008752;EVM0020210;EVM0018863;EVM0018861;EVM0016697;EVM0016059;EVM0001924;EVM0010441;EVM0004158;EVM0014166;EVM0004238;EVM0014760;EVM0016866;EVM0005435;EVM0011060;EVM0005686;EVM0017337;EVM0004143;EVM0000265;EVM0023857;EVM0003049;EVM0014771;EVM0021182;EVM0003461;EVM…
GO:0006811	ion transport	1	biological_process	EVM0021899;EVM0016067;EVM0020321;EVM0004238;EVM0005056;EVM0015172;EVM0021751;EVM0022157;EVM0024272;EVM0012643;EVM0020708;EVM0023734;EVM0012251;EVM0013058;EVM0008067;EVM0018387;EVM0012726;EVM0021486;EVM0000551;EVM0020998;EVM0022299;EVM0020451;EVM0023213;EVM0001943;EVM0015079;EVM0021201;EVM0008800;EVM0022833;EVM0001960;EVM0013603;EVM0004279;EVM0005301;EVM0012081
GO:0044237	cellular metabolic process	1	biological_process	EVM0013628;EVM0019880;EVM0022319;EVM0017617;EVM0014031;EVM0015501;EVM0024130;EVM0005101;EVM0014427;EVM0014353;EVM0002915;EVM0006011;EVM0009550;EVM0024546;EVM0022691;EVM0001748;EVM0008978;EVM0008752;EVM0008990;EVM0020210;EVM0018863;EVM0005280;EVM0013262;EVM0010441;EVM0017833;EVM0004238;EVM0023861;EVM0015369;EVM0020359;EVM0009612;EVM0002332;EVM0023483;EVM0011944;EVM0005686;EVM0017337;EVM0010872;EVM…
GO:1901617	organic hydroxy compound biosynthetic process	1	biological_process	EVM0022317;EVM0002664;EVM0013664;EVM0015306;EVM0003702;EVM0003666;EVM0017168;EVM0021122;EVM0008849;EVM0006641;EVM0013544;EVM0006895;EVM0019606;EVM0008050;EVM0017661;EVM0010055
GO:0036452	ESCRT complex	1	cellular_component	EVM0023184;EVM0002762;EVM0006437;EVM0011873
GO:1901421	positive regulation of response to alcohol	1	biological_process	EVM0006572;EVM0004242;EVM0014270;EVM0021078
GO:0000295	adenine nucleotide transmembrane transporter activity	1	molecular_function	EVM0004238;EVM0012251;EVM0000309;EVM0008800
GO:0015216	purine nucleotide transmembrane transporter activity	1	molecular_function	EVM0004238;EVM0012251;EVM0000309;EVM0008800
GO:0005346	purine ribonucleotide transmembrane transporter activity	1	molecular_function	EVM0004238;EVM0012251;EVM0000309;EVM0008800
GO:0043295	glutathione binding	1	molecular_function	EVM0009600;EVM0001120;EVM0006281;EVM0019155;EVM0002980;EVM0001547
GO:0072341	modified amino acid binding	1	molecular_function	EVM0009600;EVM0001120;EVM0006281;EVM0019155;EVM0002980;EVM0001547
GO:1900750	oligopeptide binding	1	molecular_function	EVM0009600;EVM0001120;EVM0006281;EVM0019155;EVM0002980;EVM0001547
GO:0050793	regulation of developmental process	1	biological_process	EVM0010829;EVM0006914;EVM0013639;EVM0000400;EVM0008686;EVM0020210;EVM0016697;EVM0016059;EVM0010441;EVM0010842;EVM0005435;EVM0017337;EVM0024588;EVM0023101;EVM0001124;EVM0010793;EVM0008403;EVM0020033;EVM0017547;EVM0024062;EVM0017160;EVM0014413;EVM0004109;EVM0008849;EVM0020059;EVM0001672;EVM0005203;EVM0007591;EVM0011480;EVM0022622;EVM0009410;EVM0017355;EVM0006895;EVM0005752;EVM0008555;EVM0017241;EVM…
GO:0071704	organic substance metabolic process	1	biological_process	EVM0013628;EVM0022317;EVM0022319;EVM0017617;EVM0014031;EVM0015501;EVM0002102;EVM0003857;EVM0009813;EVM0005101;EVM0014427;EVM0014353;EVM0002915;EVM0006011;EVM0009550;EVM0024546;EVM0001748;EVM0008978;EVM0008752;EVM0002664;EVM0008990;EVM0020210;EVM0018863;EVM0005280;EVM0013262;EVM0010441;EVM0000417;EVM0017833;EVM0004238;EVM0023861;EVM0015369;EVM0009612;EVM0002332;EVM0023483;EVM0011944;EVM0011060;EVM…
GO:0043229	intracellular organelle	1	cellular_component	EVM0016893;EVM0013113;EVM0001348;EVM0021896;EVM0021899;EVM0013628;EVM0004190;EVM0002920;EVM0013245;EVM0019509;EVM0021412;EVM0017617;EVM0000982;EVM0014997;EVM0006914;EVM0021662;EVM0015033;EVM0014031;EVM0007633;EVM0008304;EVM0009160;EVM0012983;EVM0023332;EVM0015501;EVM0003636;EVM0024130;EVM0002102;EVM0003985;EVM0023029;EVM0007165;EVM0005290;EVM0005101;EVM0016409;EVM0014427;EVM0013106;EVM0005586;EVM…
GO:1905957	regulation of cellular response to alcohol	1	biological_process	EVM0006572;EVM0023101;EVM0004242;EVM0015396;EVM0014270;EVM0006216;EVM0021078
GO:0009787	regulation of abscisic acid-activated signaling pathway	1	biological_process	EVM0006572;EVM0023101;EVM0004242;EVM0015396;EVM0014270;EVM0006216;EVM0021078
GO:0035556	intracellular signal transduction	1	biological_process	EVM0009610;EVM0015304;EVM0014551;EVM0014551;EVM0012792;EVM0016008;EVM0012708;EVM0002349;EVM0002349;EVM0016597;EVM0022299;EVM0021023;EVM0021023;EVM0001960;EVM0013603;EVM0020314;EVM0001971;EVM0001971
GO:0007165	signal transduction	1	biological_process	EVM0017617;EVM0010829;EVM0009160;EVM0006572;EVM0001611;EVM0009610;EVM0003043;EVM0003462;EVM0010793;EVM0015304;EVM0023117;EVM0019929;EVM0020029;EVM0017790;EVM0014551;EVM0020367;EVM0012792;EVM0016008;EVM0007200;EVM0001693;EVM0012708;EVM0002349;EVM0020197;EVM0000626;EVM0016597;EVM0001449;EVM0022299;EVM0004242;EVM0005842;EVM0007683;EVM0020852;EVM0013976;EVM0021023;EVM0012921;EVM0017241;EVM0020503;EVM…
GO:0070542	response to fatty acid	1	biological_process	EVM0014771;EVM0000298;EVM0010934
GO:0032107	regulation of response to nutrient levels	1	biological_process	EVM0019378;EVM0014985;EVM0019960
GO:0032104	regulation of response to extracellular stimulus	1	biological_process	EVM0019378;EVM0014985;EVM0019960
GO:0015868	purine ribonucleotide transport	1	biological_process	EVM0004238;EVM0012251;EVM0008800
GO:0007275	multicellular organism development	1	biological_process	EVM0021894;EVM0010829;EVM0000237;EVM0015501;EVM0012740;EVM0003857;EVM0016665;EVM0009550;EVM0014029;EVM0008686;EVM0001748;EVM0008752;EVM0020210;EVM0018863;EVM0018861;EVM0016697;EVM0016059;EVM0001924;EVM0010441;EVM0014166;EVM0004238;EVM0014760;EVM0005435;EVM0011060;EVM0005686;EVM0017337;EVM0000265;EVM0023857;EVM0003049;EVM0021182;EVM0003461;EVM0010793;EVM0015304;EVM0015306;EVM0006730;EVM0019212;EVM…
GO:0005488	binding	1	molecular_function	EVM0013113;EVM0019880;EVM0017617;EVM0009160;EVM0003985;EVM0014427;EVM0002915;EVM0006011;EVM0008752;EVM0008990;EVM0006572;EVM0018861;EVM0018464;EVM0002907;EVM0001611;EVM0016697;EVM0013262;EVM0013310;EVM0017833;EVM0020747;EVM0009612;EVM0009610;EVM0002332;EVM0005435;EVM0006039;EVM0023857;EVM0006702;EVM0015555;EVM0009600;EVM0021161;EVM0022853;EVM0001120;EVM0017142;EVM0000272;EVM0015304;EVM0015306;EVM…
GO:0043226	organelle	1	cellular_component	EVM0016893;EVM0013113;EVM0001348;EVM0021896;EVM0021899;EVM0013628;EVM0004190;EVM0002920;EVM0013245;EVM0019509;EVM0021412;EVM0017617;EVM0000982;EVM0014997;EVM0006914;EVM0021662;EVM0015033;EVM0014031;EVM0007633;EVM0008304;EVM0009160;EVM0012983;EVM0023332;EVM0015501;EVM0003636;EVM0024130;EVM0002102;EVM0003985;EVM0023029;EVM0007165;EVM0005290;EVM0005101;EVM0016409;EVM0014427;EVM0013106;EVM0005586;EVM…
GO:0010343	singlet oxygen-mediated programmed cell death	1	biological_process	EVM0001266;EVM0017241
GO:0005924	cell-substrate adherens junction	1	cellular_component	EVM0016008;EVM0012708
GO:0005925	focal adhesion	1	cellular_component	EVM0016008;EVM0012708
GO:0005782	peroxisomal matrix	1	cellular_component	EVM0009612;EVM0010235
GO:0071941	nitrogen cycle metabolic process	1	biological_process	EVM0009603;EVM0019168
GO:0080005	photosystem stoichiometry adjustment	1	biological_process	EVM0002020;EVM0014370
GO:0070161	anchoring junction	1	cellular_component	EVM0016008;EVM0012708
GO:0052732	phosphoethanolamine phosphatase activity	1	molecular_function	EVM0017825;EVM0011478
GO:0052731	phosphocholine phosphatase activity	1	molecular_function	EVM0017825;EVM0011478
GO:0030055	cell-substrate junction	1	cellular_component	EVM0016008;EVM0012708
GO:0031907	microbody lumen	1	cellular_component	EVM0009612;EVM0010235
GO:0016768	spermine synthase activity	1	molecular_function	EVM0009784;EVM0019677
GO:0005912	adherens junction	1	cellular_component	EVM0016008;EVM0012708
GO:0097193	intrinsic apoptotic signaling pathway	1	biological_process	EVM0015304;EVM0001971
GO:0045117	azole transport	1	biological_process	EVM0012643;EVM0020998
GO:0045118	azole transporter activity	1	molecular_function	EVM0012643;EVM0020998
GO:0042126	nitrate metabolic process	1	biological_process	EVM0009603;EVM0019168
GO:0042128	nitrate assimilation	1	biological_process	EVM0009603;EVM0019168
GO:0006083	acetate metabolic process	1	biological_process	EVM0014031;EVM0024272
GO:0032578	aleurone grain membrane	1	cellular_component	EVM0009610;EVM0022299
GO:0072530	purine-containing compound transmembrane transport	1	biological_process	EVM0004238;EVM0012251;EVM0006463;EVM0008800
GO:0051172	negative regulation of nitrogen compound metabolic process	1	biological_process	EVM0006914;EVM0014427;EVM0001611;EVM0005435;EVM0001124;EVM0015304;EVM0005567;EVM0015155;EVM0020033;EVM0023138;EVM0001672;EVM0017355;EVM0005842;EVM0014852;EVM0008005;EVM0008555;EVM0017661;EVM0009452;EVM0001971;EVM0022257
GO:0032502	developmental process	1	biological_process	EVM0021894;EVM0010829;EVM0000237;EVM0009784;EVM0015501;EVM0012740;EVM0003857;EVM0016665;EVM0009550;EVM0014029;EVM0008686;EVM0001748;EVM0008752;EVM0020210;EVM0018863;EVM0018861;EVM0016697;EVM0016059;EVM0001924;EVM0010441;EVM0004158;EVM0014166;EVM0004238;EVM0014760;EVM0016866;EVM0005435;EVM0011060;EVM0005686;EVM0017337;EVM0004143;EVM0000265;EVM0023857;EVM0003049;EVM0014771;EVM0021182;EVM0003461;EVM…
GO:0098656	anion transmembrane transport	1	biological_process	EVM0005056;EVM0015172;EVM0024272;EVM0012251;EVM0020998;EVM0020451;EVM0015079;EVM0021201;EVM0004279
GO:1901419	regulation of response to alcohol	1	biological_process	EVM0006572;EVM0023101;EVM0004242;EVM0015396;EVM0014270;EVM0006216;EVM0021078
GO:0009911	positive regulation of flower development	1	biological_process	EVM0010441;EVM0010842;EVM0005435;EVM0008849;EVM0014871
GO:0010224	response to UV-B	1	biological_process	EVM0022317;EVM0002664;EVM0013664;EVM0015304;EVM0017168;EVM0008849;EVM0006641;EVM0013544;EVM0008050;EVM0010055
GO:0046434	organophosphate catabolic process	1	biological_process	EVM0015501;EVM0008752;EVM0009612;EVM0002332;EVM0022501;EVM0015304;EVM0015155;EVM0009289;EVM0020367;EVM0023734;EVM0012484;EVM0020836;EVM0012726;EVM0008102;EVM0016597;EVM0005842;EVM0008555;EVM0008022;EVM0009516;EVM0001971;EVM0021860;EVM0000683;EVM0009443;EVM0020694
GO:0004888	transmembrane signaling receptor activity	1	molecular_function	EVM0003462;EVM0007200;EVM0001449;EVM0020503;EVM0001960;EVM0021316
GO:0004674	protein serine/threonine kinase activity	1	molecular_function	EVM0013628;EVM0014353;EVM0002915;EVM0006834;EVM0014551;EVM0003126;EVM0021157;EVM0008465;EVM0007200;EVM0012610;EVM0002349;EVM0012905;EVM0001449;EVM0000636;EVM0013976;EVM0021023;EVM0013415;EVM0016657;EVM0006935;EVM0016732;EVM0022327;EVM0021078
GO:0048856	anatomical structure development	1	biological_process	EVM0021894;EVM0010829;EVM0000237;EVM0009784;EVM0015501;EVM0012740;EVM0003857;EVM0016665;EVM0009550;EVM0014029;EVM0008686;EVM0001748;EVM0008752;EVM0020210;EVM0018863;EVM0018861;EVM0016697;EVM0016059;EVM0001924;EVM0010441;EVM0004158;EVM0014166;EVM0004238;EVM0014760;EVM0016866;EVM0005435;EVM0011060;EVM0005686;EVM0017337;EVM0000265;EVM0023857;EVM0003049;EVM0014771;EVM0021182;EVM0003461;EVM0010793;EVM…
GO:0036094	small molecule binding	1	molecular_function	EVM0009160;EVM0006572;EVM0009612;EVM0002332;EVM0015555;EVM0009600;EVM0001120;EVM0022401;EVM0014146;EVM0024392;EVM0014635;EVM0006281;EVM0011581;EVM0019155;EVM0003829;EVM0019713;EVM0002980;EVM0008102;EVM0009889;EVM0006895;EVM0005842;EVM0001547;EVM0008555;EVM0017241;EVM0009516;EVM0003075
GO:0031325	positive regulation of cellular metabolic process	1	biological_process	EVM0013628;EVM0015503;EVM0002907;EVM0014170;EVM0003043;EVM0020029;EVM0003065;EVM0012792;EVM0006619;EVM0017304;EVM0014413;EVM0009977;EVM0007591;EVM0004242;EVM0005842;EVM0007680;EVM0005752;EVM0002087;EVM0009516;EVM0017525;EVM0001782;EVM0016434;EVM0019274;EVM0001971
GO:0003677	DNA binding	1	molecular_function	EVM0003985;EVM0014427;EVM0018861;EVM0018464;EVM0002907;EVM0001611;EVM0016697;EVM0017833;EVM0017833;EVM0009612;EVM0005435;EVM0015304;EVM0015304;EVM0022401;EVM0015155;EVM0015155;EVM0012792;EVM0005155;EVM0020033;EVM0017160;EVM0014413;EVM0024392;EVM0024392;EVM0001672;EVM0021495;EVM0009410;EVM0000626;EVM0017355;EVM0017355;EVM0005752;EVM0002087;EVM0017525;EVM0001782;EVM0003075;EVM0001971
GO:0015932	nucleobase-containing compound transmembrane transporter activity	1	molecular_function	EVM0004238;EVM0011379;EVM0012251;EVM0001186;EVM0006463;EVM0010713;EVM0000309;EVM0008800
GO:0044267	cellular protein metabolic process	1	biological_process	EVM0013628;EVM0014353;EVM0002915;EVM0006011;EVM0008990;EVM0018863;EVM0010441;EVM0009612;EVM0023483;EVM0011944;EVM0005686;EVM0010872;EVM0024588;EVM0023292;EVM0023101;EVM0022853;EVM0016852;EVM0001636;EVM0010793;EVM0001134;EVM0006834;EVM0014370;EVM0014551;EVM0008403;EVM0006532;EVM0001876;EVM0003126;EVM0021157;EVM0004637;EVM0021708;EVM0008465;EVM0003134;EVM0007200;EVM0020836;EVM0001693;EVM0022376;EVM…
GO:2000241	regulation of reproductive process	1	biological_process	EVM0008686;EVM0016697;EVM0016059;EVM0001924;EVM0010441;EVM0010842;EVM0005435;EVM0023101;EVM0015304;EVM0008403;EVM0017547;EVM0014413;EVM0008849;EVM0020059;EVM0001672;EVM0005203;EVM0011480;EVM0017355;EVM0005842;EVM0014871
GO:0044238	primary metabolic process	1	biological_process	EVM0013628;EVM0022319;EVM0017617;EVM0014031;EVM0015501;EVM0002102;EVM0003857;EVM0009813;EVM0005101;EVM0014427;EVM0014353;EVM0002915;EVM0006011;EVM0009550;EVM0024546;EVM0001748;EVM0008978;EVM0008752;EVM0008990;EVM0020210;EVM0018863;EVM0005280;EVM0013262;EVM0010441;EVM0000417;EVM0017833;EVM0004238;EVM0015369;EVM0009612;EVM0002332;EVM0023483;EVM0011944;EVM0011060;EVM0005686;EVM0010872;EVM0004143;EVM…
GO:0016607	nuclear speck	1	cellular_component	EVM0023101;EVM0016008;EVM0012708;EVM0005842;EVM0009322;EVM0001971
GO:0045727	positive regulation of translation	1	biological_process	EVM0013628;EVM0005842;EVM0009516;EVM0001971
GO:0009639	response to red or far red light	1	biological_process	EVM0015501;EVM0016409;EVM0014029;EVM0018861;EVM0001611;EVM0003049;EVM0007717;EVM0005155;EVM0020631;EVM0020059;EVM0000626;EVM0020852;EVM0017241;EVM0012712;EVM0018481
GO:0015802	basic amino acid transport	1	biological_process	EVM0020998;EVM0020451;EVM0015079
GO:0004427	inorganic diphosphatase activity	1	molecular_function	EVM0014148;EVM0017825;EVM0011478
GO:0015996	chlorophyll catabolic process	1	biological_process	EVM0010657;EVM0001134;EVM0000036
GO:0051503	adenine nucleotide transport	1	biological_process	EVM0004238;EVM0012251;EVM0008800
GO:0046149	pigment catabolic process	1	biological_process	EVM0010657;EVM0001134;EVM0000036
GO:0000990	transcription factor activity, core RNA polymerase binding	1	molecular_function	EVM0015369;EVM0002020;EVM0012871
GO:0019538	protein metabolic process	1	biological_process	EVM0013628;EVM0002102;EVM0014353;EVM0002915;EVM0006011;EVM0008990;EVM0018863;EVM0010441;EVM0009612;EVM0023483;EVM0011944;EVM0005686;EVM0010872;EVM0010278;EVM0024588;EVM0023292;EVM0023101;EVM0022853;EVM0016852;EVM0001636;EVM0010793;EVM0001134;EVM0006834;EVM0014370;EVM0014551;EVM0008403;EVM0006532;EVM0001876;EVM0003126;EVM0021157;EVM0004637;EVM0021708;EVM0008465;EVM0003134;EVM0007200;EVM0020836;EVM…
GO:0045934	negative regulation of nucleobase-containing compound metabolic process	1	biological_process	EVM0006914;EVM0014427;EVM0001611;EVM0005435;EVM0001124;EVM0015304;EVM0005567;EVM0015155;EVM0020033;EVM0023138;EVM0001672;EVM0017355;EVM0008005;EVM0008555;EVM0017661;EVM0009452;EVM0022257
GO:0008509	anion transmembrane transporter activity	1	molecular_function	EVM0021899;EVM0016067;EVM0004238;EVM0005056;EVM0015172;EVM0024272;EVM0020708;EVM0012251;EVM0008067;EVM0018387;EVM0020998;EVM0020451;EVM0000309;EVM0015079;EVM0021201;EVM0008800;EVM0004279
GO:0051276	chromosome organization	1	biological_process	EVM0003985;EVM0014427;EVM0010441;EVM0017833;EVM0005686;EVM0015304;EVM0014547;EVM0015155;EVM0009289;EVM0008403;EVM0001501;EVM0023138;EVM0011581;EVM0021495;EVM0011480;EVM0017355;EVM0008005;EVM0009452;EVM0022797;EVM0001971;EVM0012179
GO:0015075	ion transmembrane transporter activity	1	molecular_function	EVM0021899;EVM0016067;EVM0020321;EVM0004238;EVM0005056;EVM0015172;EVM0021751;EVM0022157;EVM0024272;EVM0020708;EVM0023734;EVM0012251;EVM0008067;EVM0018387;EVM0021486;EVM0000551;EVM0020998;EVM0020451;EVM0001943;EVM0000309;EVM0015079;EVM0021201;EVM0008800;EVM0001960;EVM0013603;EVM0004279;EVM0012081
GO:0009893	positive regulation of metabolic process	1	biological_process	EVM0013628;EVM0015503;EVM0002907;EVM0014170;EVM0003043;EVM0020029;EVM0003065;EVM0012792;EVM0006619;EVM0017304;EVM0014413;EVM0009977;EVM0007591;EVM0000626;EVM0004242;EVM0005842;EVM0007680;EVM0005752;EVM0002087;EVM0009516;EVM0017525;EVM0001782;EVM0016434;EVM0019274;EVM0001971
GO:0010604	positive regulation of macromolecule metabolic process	1	biological_process	EVM0013628;EVM0015503;EVM0002907;EVM0014170;EVM0003043;EVM0020029;EVM0003065;EVM0012792;EVM0006619;EVM0017304;EVM0014413;EVM0009977;EVM0007591;EVM0004242;EVM0005842;EVM0007680;EVM0005752;EVM0002087;EVM0009516;EVM0017525;EVM0001782;EVM0016434;EVM0001971
GO:0004871	signal transducer activity	1	molecular_function	EVM0003462;EVM0014551;EVM0007200;EVM0002349;EVM0001449;EVM0020852;EVM0021023;EVM0017241;EVM0020503;EVM0001960;EVM0021316;EVM0022327
GO:0031669	cellular response to nutrient levels	1	biological_process	EVM0023101;EVM0003240;EVM0014413;EVM0019378;EVM0015916;EVM0017962;EVM0017825;EVM0014985;EVM0019960;EVM0021201;EVM0012160;EVM0011478
GO:0034220	ion transmembrane transport	1	biological_process	EVM0021899;EVM0016067;EVM0020321;EVM0004238;EVM0005056;EVM0015172;EVM0021751;EVM0022157;EVM0024272;EVM0020708;EVM0023734;EVM0012251;EVM0008067;EVM0018387;EVM0021486;EVM0000551;EVM0020998;EVM0022299;EVM0020451;EVM0001943;EVM0015079;EVM0021201;EVM0008800;EVM0001960;EVM0013603;EVM0004279;EVM0012081
GO:0070417	cellular response to cold	1	biological_process	EVM0015761;EVM0019378;EVM0014985;EVM0019960
GO:0034250	positive regulation of cellular amide metabolic process	1	biological_process	EVM0013628;EVM0005842;EVM0009516;EVM0001971
GO:0009404	toxin metabolic process	1	biological_process	EVM0009600;EVM0001120;EVM0006281;EVM0019155;EVM0002980;EVM0011391;EVM0006895;EVM0001547
GO:1901701	cellular response to oxygen-containing compound	1	biological_process	EVM0017617;EVM0010829;EVM0009160;EVM0006572;EVM0003043;EVM0014771;EVM0009600;EVM0001120;EVM0010793;EVM0023117;EVM0019929;EVM0020029;EVM0017790;EVM0000298;EVM0006281;EVM0001266;EVM0021706;EVM0019155;EVM0010429;EVM0002980;EVM0000626;EVM0022299;EVM0004242;EVM0007683;EVM0013976;EVM0001547;EVM0012921;EVM0017241;EVM0018481;EVM0001960;EVM0013283;EVM0010934;EVM0006216;EVM0021860;EVM0010235
GO:0009605	response to external stimulus	1	biological_process	EVM0021894;EVM0022319;EVM0015033;EVM0008304;EVM0007181;EVM0002102;EVM0009794;EVM0018863;EVM0016059;EVM0010840;EVM0003500;EVM0016510;EVM0017337;EVM0009802;EVM0021741;EVM0009600;EVM0003461;EVM0023292;EVM0023101;EVM0001120;EVM0001636;EVM0015761;EVM0023595;EVM0020029;EVM0017790;EVM0004726;EVM0003240;EVM0012792;EVM0002533;EVM0005155;EVM0017547;EVM0017656;EVM0014413;EVM0000298;EVM0006281;EVM0020738;EVM…
GO:0009062	fatty acid catabolic process	1	biological_process	EVM0005280;EVM0004238;EVM0024272;EVM0008800;EVM0014270
GO:0031965	nuclear membrane	1	cellular_component	EVM0004888;EVM0004114;EVM0017180;EVM0020451;EVM0015079
GO:0010647	positive regulation of cell communication	1	biological_process	EVM0006572;EVM0019378;EVM0001693;EVM0014985;EVM0019960;EVM0004242;EVM0014270;EVM0021078
GO:0006787	porphyrin-containing compound catabolic process	1	biological_process	EVM0010657;EVM0001134;EVM0000036
GO:0051187	cofactor catabolic process	1	biological_process	EVM0010657;EVM0001134;EVM0000036
GO:0009247	glycolipid biosynthetic process	1	biological_process	EVM0024546;EVM0012126;EVM0002935
GO:0048586	regulation of long-day photoperiodism, flowering	1	biological_process	EVM0008403;EVM0020059;EVM0005203
GO:0015217	ADP transmembrane transporter activity	1	molecular_function	EVM0004238;EVM0000309;EVM0008800
GO:0046488	phosphatidylinositol metabolic process	1	biological_process	EVM0001748;EVM0012001;EVM0005752
GO:0051592	response to calcium ion	1	biological_process	EVM0019880;EVM0009610;EVM0020314
GO:0033015	tetrapyrrole catabolic process	1	biological_process	EVM0010657;EVM0001134;EVM0000036
GO:0009637	response to blue light	1	biological_process	EVM0020059;EVM0008102;EVM0017241;EVM0018481;EVM0017525;EVM0001782;EVM0021860
GO:0043269	regulation of ion transport	1	biological_process	EVM0003240;EVM0007200;EVM0001943;EVM0013976;EVM0013603;EVM0017116
GO:1901681	sulfur compound binding	1	molecular_function	EVM0009600;EVM0001120;EVM0006281;EVM0019155;EVM0002980;EVM0001547
GO:0032922	circadian regulation of gene expression	1	biological_process	EVM0015501;EVM0022797
GO:0006346	methylation-dependent chromatin silencing	1	biological_process	EVM0008005;EVM0009452
GO:0071452	cellular response to singlet oxygen	1	biological_process	EVM0001266;EVM0017241
GO:0000400	four-way junction DNA binding	1	molecular_function	EVM0015304;EVM0015155
GO:0032301	MutSalpha complex	1	cellular_component	EVM0015304;EVM0015155
GO:0000813	ESCRT I complex	1	cellular_component	EVM0006437;EVM0011873
GO:0090599	alpha-glucosidase activity	1	molecular_function	EVM0013639;EVM0006730
GO:0015203	polyamine transmembrane transporter activity	1	molecular_function	EVM0012722;EVM0014481
GO:0001653	peptide receptor activity	1	molecular_function	EVM0003462;EVM0022327
GO:0032138	single base insertion or deletion binding	1	molecular_function	EVM0015304;EVM0015155
GO:0032137	guanine/thymine mispair binding	1	molecular_function	EVM0015304;EVM0015155
GO:0015854	guanine transport	1	biological_process	EVM0001186;EVM0010713
GO:0015853	adenine transport	1	biological_process	EVM0001186;EVM0010713
GO:0008453	alanine-glyoxylate transaminase activity	1	molecular_function	EVM0020359;EVM0014187
GO:1902047	polyamine transmembrane transport	1	biological_process	EVM0012722;EVM0014481
GO:0030527	structural constituent of chromatin	1	molecular_function	EVM0003985;EVM0021495
GO:0004575	sucrose alpha-glucosidase activity	1	molecular_function	EVM0013639;EVM0006730
GO:0004558	alpha-1,4-glucosidase activity	1	molecular_function	EVM0013639;EVM0006730
GO:0000023	maltose metabolic process	1	biological_process	EVM0001078;EVM0001209
GO:0015846	polyamine transport	1	biological_process	EVM0012722;EVM0014481
GO:0033095	aleurone grain	1	cellular_component	EVM0009610;EVM0022299
GO:0048657	anther wall tapetum cell differentiation	1	biological_process	EVM0008849;EVM0021316
GO:0048656	anther wall tapetum formation	1	biological_process	EVM0008849;EVM0021316
GO:0048655	anther wall tapetum morphogenesis	1	biological_process	EVM0008849;EVM0021316
GO:0048654	anther morphogenesis	1	biological_process	EVM0008849;EVM0021316
GO:0005982	starch metabolic process	1	biological_process	EVM0005101;EVM0021706;EVM0001078;EVM0001209;EVM0009661;EVM0001154
GO:0042277	peptide binding	1	molecular_function	EVM0009600;EVM0001120;EVM0006281;EVM0019155;EVM0002980;EVM0001547
GO:2000113	negative regulation of cellular macromolecule biosynthetic process	1	biological_process	EVM0006914;EVM0014427;EVM0001611;EVM0005435;EVM0001124;EVM0005567;EVM0020033;EVM0023138;EVM0001672;EVM0017355;EVM0005842;EVM0014852;EVM0008005;EVM0008555;EVM0017661;EVM0009452;EVM0001971;EVM0022257
GO:0010558	negative regulation of macromolecule biosynthetic process	1	biological_process	EVM0006914;EVM0014427;EVM0001611;EVM0005435;EVM0001124;EVM0005567;EVM0020033;EVM0023138;EVM0001672;EVM0017355;EVM0005842;EVM0014852;EVM0008005;EVM0008555;EVM0017661;EVM0009452;EVM0001971;EVM0022257
GO:0009267	cellular response to starvation	1	biological_process	EVM0023101;EVM0003240;EVM0014413;EVM0019378;EVM0015916;EVM0017962;EVM0017825;EVM0014985;EVM0019960;EVM0012160;EVM0011478
GO:0006812	cation transport	1	biological_process	EVM0016067;EVM0020321;EVM0005056;EVM0015172;EVM0021751;EVM0022157;EVM0012643;EVM0023734;EVM0013058;EVM0021486;EVM0000551;EVM0020998;EVM0022299;EVM0023213;EVM0001943;EVM0022833;EVM0001960;EVM0013603;EVM0005301;EVM0012081
GO:0016020	membrane	1	cellular_component	EVM0016893;EVM0005465;EVM0004842;EVM0021896;EVM0021899;EVM0019880;EVM0013245;EVM0022319;EVM0017617;EVM0000237;EVM0015033;EVM0007633;EVM0007181;EVM0008763;EVM0003450;EVM0006583;EVM0004729;EVM0018879;EVM0016081;EVM0022869;EVM0014427;EVM0005589;EVM0002915;EVM0006011;EVM0016067;EVM0013923;EVM0001597;EVM0009220;EVM0009481;EVM0009550;EVM0018266;EVM0014022;EVM0024546;EVM0008373;EVM0023909;EVM0003624;EVM…
GO:0046486	glycerolipid metabolic process	1	biological_process	EVM0001748;EVM0020210;EVM0012001;EVM0016597;EVM0005752;EVM0013976;EVM0017460
GO:0040034	regulation of development, heterochronic	1	biological_process	EVM0013639;EVM0000400;EVM0024062;EVM0017160
GO:0006352	DNA-templated transcription, initiation	1	biological_process	EVM0015369;EVM0002020;EVM0000272;EVM0012871
GO:0008186	RNA-dependent ATPase activity	1	molecular_function	EVM0009289;EVM0020836;EVM0005842;EVM0001971
GO:0015291	secondary active transmembrane transporter activity	1	molecular_function	EVM0009749;EVM0021751;EVM0022157;EVM0024272;EVM0018284;EVM0000309;EVM0004279;EVM0012081
GO:0005985	sucrose metabolic process	1	biological_process	EVM0006730;EVM0015916;EVM0013976
GO:0035250	UDP-galactosyltransferase activity	1	molecular_function	EVM0024546;EVM0012126;EVM0015825
GO:0019199	transmembrane receptor protein kinase activity	1	molecular_function	EVM0007200;EVM0001449;EVM0021316
GO:0006643	membrane lipid metabolic process	1	biological_process	EVM0022319;EVM0024546;EVM0007717;EVM0012126;EVM0006758;EVM0002935
GO:0033218	amide binding	1	molecular_function	EVM0009600;EVM0001120;EVM0006281;EVM0019155;EVM0002980;EVM0001547
GO:0031667	response to nutrient levels	1	biological_process	EVM0023101;EVM0003240;EVM0014413;EVM0019378;EVM0015916;EVM0017962;EVM0017825;EVM0014985;EVM0019960;EVM0021201;EVM0012160;EVM0021860;EVM0011478
GO:1901264	carbohydrate derivative transport	1	biological_process	EVM0021899;EVM0004238;EVM0011379;EVM0012251;EVM0006463;EVM0018387;EVM0008800
GO:0043168	anion binding	1	molecular_function	EVM0009160;EVM0006572;EVM0009612;EVM0002332;EVM0015555;EVM0009600;EVM0001120;EVM0014146;EVM0024392;EVM0014635;EVM0006281;EVM0011581;EVM0019155;EVM0003829;EVM0019713;EVM0002980;EVM0008102;EVM0009889;EVM0006895;EVM0005842;EVM0001547;EVM0008555;EVM0017241;EVM0009516;EVM0007064
GO:0044707	single-multicellular organism process	1	biological_process	EVM0021894;EVM0010829;EVM0000237;EVM0015501;EVM0012740;EVM0003857;EVM0016665;EVM0009550;EVM0014029;EVM0008686;EVM0001748;EVM0008752;EVM0020210;EVM0018863;EVM0018861;EVM0016697;EVM0016059;EVM0001924;EVM0010441;EVM0014166;EVM0004238;EVM0014760;EVM0005435;EVM0011060;EVM0005686;EVM0017337;EVM0000265;EVM0023857;EVM0003049;EVM0021182;EVM0003461;EVM0010793;EVM0015304;EVM0015306;EVM0006730;EVM0019212;EVM…
GO:0048581	negative regulation of post-embryonic development	1	biological_process	EVM0006914;EVM0008686;EVM0016059;EVM0023101;EVM0001124;EVM0008403;EVM0001672;EVM0005203;EVM0011480;EVM0017355
GO:0043565	sequence-specific DNA binding	1	molecular_function	EVM0018464;EVM0002907;EVM0017833;EVM0009612;EVM0005435;EVM0022401;EVM0020033;EVM0014413;EVM0009410;EVM0017525;EVM0003075
GO:0016881	acid-amino acid ligase activity	1	molecular_function	EVM0023483;EVM0024588;EVM0023101;EVM0001636;EVM0001876;EVM0004637;EVM0006517;EVM0022376;EVM0011391;EVM0020322;EVM0012147;EVM0012449;EVM0014655;EVM0001021;EVM0006216
GO:0005829	cytosol	1	cellular_component	EVM0013623;EVM0004190;EVM0017274;EVM0021412;EVM0006914;EVM0015033;EVM0002102;EVM0018879;EVM0023249;EVM0003857;EVM0005290;EVM0006011;EVM0013253;EVM0013923;EVM0004520;EVM0009550;EVM0018266;EVM0001748;EVM0008752;EVM0001615;EVM0009363;EVM0024202;EVM0015369;EVM0009610;EVM0002472;EVM0011060;EVM0016510;EVM0006039;EVM0018063;EVM0010872;EVM0004143;EVM0010278;EVM0014778;EVM0009600;EVM0001120;EVM0001124;EVM…
GO:0005984	disaccharide metabolic process	1	biological_process	EVM0006730;EVM0015916;EVM0001078;EVM0001209;EVM0013976
GO:0009910	negative regulation of flower development	1	biological_process	EVM0008686;EVM0016059;EVM0023101;EVM0001672;EVM0011480;EVM0017355
GO:0009625	response to insect	1	biological_process	EVM0020029;EVM0011391;EVM0012921;EVM0020882
GO:0022611	dormancy process	1	biological_process	EVM0008686;EVM0003666;EVM0020631;EVM0019606
GO:0010162	seed dormancy process	1	biological_process	EVM0008686;EVM0003666;EVM0020631;EVM0019606
GO:0032501	multicellular organismal process	1	biological_process	EVM0021894;EVM0010829;EVM0000237;EVM0015501;EVM0012740;EVM0003857;EVM0016665;EVM0009550;EVM0014029;EVM0008686;EVM0001748;EVM0008752;EVM0020210;EVM0018863;EVM0018861;EVM0016697;EVM0016059;EVM0001924;EVM0010441;EVM0004158;EVM0014166;EVM0004238;EVM0014760;EVM0016866;EVM0005435;EVM0011060;EVM0005686;EVM0017337;EVM0000265;EVM0023857;EVM0003049;EVM0021182;EVM0003461;EVM0010793;EVM0015304;EVM0015306;EVM…
GO:0009056	catabolic process	1	biological_process	EVM0017617;EVM0015501;EVM0008752;EVM0005280;EVM0004238;EVM0009612;EVM0002332;EVM0017337;EVM0010657;EVM0010278;EVM0022501;EVM0009600;EVM0001120;EVM0015304;EVM0006730;EVM0001134;EVM0015155;EVM0009289;EVM0015936;EVM0020367;EVM0024272;EVM0023734;EVM0006281;EVM0012484;EVM0019155;EVM0001078;EVM0020836;EVM0002980;EVM0000036;EVM0022376;EVM0012726;EVM0008102;EVM0016597;EVM0001209;EVM0009661;EVM0005842;EVM…
GO:0016874	ligase activity	1	molecular_function	EVM0014031;EVM0023483;EVM0017337;EVM0024588;EVM0023101;EVM0001636;EVM0003710;EVM0001876;EVM0019168;EVM0004637;EVM0006517;EVM0022376;EVM0011391;EVM0020322;EVM0019549;EVM0012147;EVM0012449;EVM0014655;EVM0001021;EVM0006216;EVM0012393
GO:0044260	cellular macromolecule metabolic process	1	biological_process	EVM0013628;EVM0005101;EVM0014427;EVM0014353;EVM0002915;EVM0006011;EVM0008978;EVM0008990;EVM0018863;EVM0010441;EVM0017833;EVM0015369;EVM0009612;EVM0023483;EVM0011944;EVM0005686;EVM0010872;EVM0000265;EVM0003049;EVM0024588;EVM0023292;EVM0002020;EVM0023101;EVM0022853;EVM0016852;EVM0001636;EVM0010793;EVM0000272;EVM0015304;EVM0001134;EVM0015155;EVM0006834;EVM0014370;EVM0014551;EVM0008403;EVM0015936;EVM…
GO:0010029	regulation of seed germination	1	biological_process	EVM0010829;EVM0013639;EVM0020210;EVM0017337;EVM0024588;EVM0022622
GO:1902644	tertiary alcohol metabolic process	1	biological_process	EVM0003666;EVM0020631;EVM0019606
GO:0004707	MAP kinase activity	1	molecular_function	EVM0014551;EVM0002349;EVM0021023
GO:0055075	potassium ion homeostasis	1	biological_process	EVM0019880;EVM0009610;EVM0003240
GO:0009687	abscisic acid metabolic process	1	biological_process	EVM0003666;EVM0020631;EVM0019606
GO:0005347	ATP transmembrane transporter activity	1	molecular_function	EVM0004238;EVM0000309;EVM0008800
GO:2000028	regulation of photoperiodism, flowering	1	biological_process	EVM0008403;EVM0020059;EVM0005203
GO:0043288	apocarotenoid metabolic process	1	biological_process	EVM0003666;EVM0020631;EVM0019606
GO:0016641	oxidoreductase activity, acting on the CH-NH2 group of donors, oxygen as acceptor	1	molecular_function	EVM0005730;EVM0000298;EVM0010934
GO:0020037	heme binding	1	molecular_function	EVM0015306;EVM0023416
GO:0010044	response to aluminum ion	1	biological_process	EVM0005985;EVM0008022
GO:0040012	regulation of locomotion	1	biological_process	EVM0020836;EVM0016597
GO:0040017	positive regulation of locomotion	1	biological_process	EVM0020836;EVM0016597
GO:0099094	ligand-gated cation channel activity	1	molecular_function	EVM0001943;EVM0013603
GO:0032527	protein exit from endoplasmic reticulum	1	biological_process	EVM0022376;EVM0001021
GO:0045962	positive regulation of development, heterochronic	1	biological_process	EVM0024062;EVM0017160
GO:0005242	inward rectifier potassium channel activity	1	molecular_function	EVM0001943;EVM0013603
GO:0019374	galactolipid metabolic process	1	biological_process	EVM0022319;EVM0024546
GO:0006813	potassium ion transport	1	biological_process	EVM0020321;EVM0022299;EVM0001943;EVM0013603;EVM0005301
GO:2000026	regulation of multicellular organismal development	1	biological_process	EVM0010829;EVM0006914;EVM0013639;EVM0000400;EVM0008686;EVM0020210;EVM0016697;EVM0016059;EVM0010441;EVM0010842;EVM0005435;EVM0017337;EVM0024588;EVM0023101;EVM0001124;EVM0008403;EVM0014413;EVM0008849;EVM0020059;EVM0001672;EVM0005203;EVM0011480;EVM0022622;EVM0017355;EVM0006895;EVM0005752;EVM0017241;EVM0014871;EVM0020314
GO:0009411	response to UV	1	biological_process	EVM0022317;EVM0002664;EVM0013664;EVM0015304;EVM0015155;EVM0017168;EVM0008849;EVM0006641;EVM0013544;EVM0009889;EVM0008050;EVM0010055
GO:0006664	glycolipid metabolic process	1	biological_process	EVM0022319;EVM0024546;EVM0012126;EVM0002935
GO:0044248	cellular catabolic process	1	biological_process	EVM0015501;EVM0008752;EVM0005280;EVM0004238;EVM0009612;EVM0002332;EVM0017337;EVM0010657;EVM0022501;EVM0009600;EVM0001120;EVM0015304;EVM0006730;EVM0001134;EVM0015155;EVM0009289;EVM0015936;EVM0020367;EVM0024272;EVM0023734;EVM0006281;EVM0012484;EVM0019155;EVM0001078;EVM0020836;EVM0002980;EVM0000036;EVM0022376;EVM0012726;EVM0008102;EVM0016597;EVM0001209;EVM0009661;EVM0005842;EVM0001547;EVM0008555;EVM…
GO:0015144	carbohydrate transmembrane transporter activity	1	molecular_function	EVM0004729;EVM0008373;EVM0022157;EVM0019154;EVM0018387;EVM0016127
GO:0043086	negative regulation of catalytic activity	1	biological_process	EVM0006039;EVM0021184;EVM0004371;EVM0009661;EVM0023829;EVM0001971
GO:1901476	carbohydrate transporter activity	1	molecular_function	EVM0004729;EVM0008373;EVM0022157;EVM0019154;EVM0018387;EVM0016127
GO:1900140	regulation of seedling development	1	biological_process	EVM0010829;EVM0013639;EVM0020210;EVM0017337;EVM0024588;EVM0022622
GO:0045017	glycerolipid biosynthetic process	1	biological_process	EVM0020210;EVM0016597;EVM0005752;EVM0013976;EVM0017460
GO:0015605	organophosphate ester transmembrane transporter activity	1	molecular_function	EVM0004238;EVM0012251;EVM0018387;EVM0000309;EVM0008800
GO:0009620	response to fungus	1	biological_process	EVM0021894;EVM0015033;EVM0008304;EVM0002102;EVM0009794;EVM0018863;EVM0010840;EVM0017337;EVM0021741;EVM0003461;EVM0020029;EVM0004726;EVM0005155;EVM0000298;EVM0020738;EVM0019494;EVM0011391;EVM0022622;EVM0001843;EVM0015396;EVM0010934;EVM0012160
GO:0033554	cellular response to stress	1	biological_process	EVM0007181;EVM0001421;EVM0009802;EVM0009600;EVM0023101;EVM0001120;EVM0017142;EVM0015304;EVM0015761;EVM0015155;EVM0003240;EVM0010244;EVM0014413;EVM0016221;EVM0006281;EVM0016008;EVM0001266;EVM0019378;EVM0011581;EVM0015916;EVM0019155;EVM0017962;EVM0007200;EVM0017825;EVM0010429;EVM0002980;EVM0012708;EVM0014985;EVM0011391;EVM0019960;EVM0021486;EVM0005842;EVM0001547;EVM0017241;EVM0009516;EVM0013603;EVM…
GO:0016879	ligase activity, forming carbon-nitrogen bonds	1	molecular_function	EVM0023483;EVM0024588;EVM0023101;EVM0001636;EVM0001876;EVM0019168;EVM0004637;EVM0006517;EVM0022376;EVM0011391;EVM0020322;EVM0012147;EVM0012449;EVM0014655;EVM0001021;EVM0006216
GO:0051093	negative regulation of developmental process	1	biological_process	EVM0006914;EVM0008686;EVM0016059;EVM0023101;EVM0001124;EVM0008403;EVM0020033;EVM0004109;EVM0001672;EVM0005203;EVM0007591;EVM0011480;EVM0017355;EVM0008555
GO:0048366	leaf development	1	biological_process	EVM0014029;EVM0005435;EVM0023117;EVM0005567;EVM0003065;EVM0024062;EVM0017160;EVM0019168;EVM0008896;EVM0001672;EVM0013976;EVM0012921;EVM0022341;EVM0017525;EVM0001782;EVM0014871;EVM0010830;EVM0022257
GO:1903825	organic acid transmembrane transport	1	biological_process	EVM0005056;EVM0015172;EVM0024272;EVM0020998;EVM0020451;EVM0015079
GO:1905039	carboxylic acid transmembrane transport	1	biological_process	EVM0005056;EVM0015172;EVM0024272;EVM0020998;EVM0020451;EVM0015079
GO:0046463	acylglycerol biosynthetic process	1	biological_process	EVM0020210;EVM0013976;EVM0017460
GO:0046460	neutral lipid biosynthetic process	1	biological_process	EVM0020210;EVM0013976;EVM0017460
GO:0009785	blue light signaling pathway	1	biological_process	EVM0017241;EVM0018481;EVM0001782
GO:0019432	triglyceride biosynthetic process	1	biological_process	EVM0020210;EVM0013976;EVM0017460
GO:0071804	cellular potassium ion transport	1	biological_process	EVM0020321;EVM0022299;EVM0001943;EVM0013603
GO:0071805	potassium ion transmembrane transport	1	biological_process	EVM0020321;EVM0022299;EVM0001943;EVM0013603
GO:1903509	liposaccharide metabolic process	1	biological_process	EVM0022319;EVM0024546;EVM0012126;EVM0002935
GO:0000988	transcription factor activity, protein binding	1	molecular_function	EVM0015369;EVM0002020;EVM0015761;EVM0009977;EVM0012871
GO:0051128	regulation of cellular component organization	1	biological_process	EVM0001924;EVM0015369;EVM0010793;EVM0015304;EVM0017547;EVM0024392;EVM0023138;EVM0016597;EVM0005842;EVM0005752;EVM0017241;EVM0009516;EVM0023829;EVM0001971
GO:0006972	hyperosmotic response	1	biological_process	EVM0003450;EVM0003294;EVM0003666;EVM0011371;EVM0020998;EVM0021449;EVM0008022
GO:0006865	amino acid transport	1	biological_process	EVM0005056;EVM0015172;EVM0012726;EVM0020998;EVM0020451;EVM0015079
GO:0000785	chromatin	1	cellular_component	EVM0003985;EVM0012523;EVM0001501;EVM0023138;EVM0021495;EVM0020652
GO:0031327	negative regulation of cellular biosynthetic process	1	biological_process	EVM0006914;EVM0014427;EVM0001611;EVM0005435;EVM0001124;EVM0005567;EVM0020033;EVM0023138;EVM0001672;EVM0017355;EVM0005842;EVM0014852;EVM0008005;EVM0008555;EVM0017661;EVM0009452;EVM0001971;EVM0022257
GO:0009143	nucleoside triphosphate catabolic process	1	biological_process	EVM0015501;EVM0008752;EVM0009612;EVM0002332;EVM0022501;EVM0015304;EVM0015155;EVM0009289;EVM0020367;EVM0023734;EVM0012484;EVM0020836;EVM0012726;EVM0008102;EVM0005842;EVM0008555;EVM0008022;EVM0009516;EVM0001971;EVM0009443;EVM0020694
GO:0009146	purine nucleoside triphosphate catabolic process	1	biological_process	EVM0015501;EVM0008752;EVM0009612;EVM0002332;EVM0022501;EVM0015304;EVM0015155;EVM0009289;EVM0020367;EVM0023734;EVM0012484;EVM0020836;EVM0012726;EVM0008102;EVM0005842;EVM0008555;EVM0008022;EVM0009516;EVM0001971;EVM0009443;EVM0020694
GO:0009261	ribonucleotide catabolic process	1	biological_process	EVM0015501;EVM0008752;EVM0009612;EVM0002332;EVM0022501;EVM0015304;EVM0015155;EVM0009289;EVM0020367;EVM0023734;EVM0012484;EVM0020836;EVM0012726;EVM0008102;EVM0005842;EVM0008555;EVM0008022;EVM0009516;EVM0001971;EVM0009443;EVM0020694
GO:0009207	purine ribonucleoside triphosphate catabolic process	1	biological_process	EVM0015501;EVM0008752;EVM0009612;EVM0002332;EVM0022501;EVM0015304;EVM0015155;EVM0009289;EVM0020367;EVM0023734;EVM0012484;EVM0020836;EVM0012726;EVM0008102;EVM0005842;EVM0008555;EVM0008022;EVM0009516;EVM0001971;EVM0009443;EVM0020694
GO:0009203	ribonucleoside triphosphate catabolic process	1	biological_process	EVM0015501;EVM0008752;EVM0009612;EVM0002332;EVM0022501;EVM0015304;EVM0015155;EVM0009289;EVM0020367;EVM0023734;EVM0012484;EVM0020836;EVM0012726;EVM0008102;EVM0005842;EVM0008555;EVM0008022;EVM0009516;EVM0001971;EVM0009443;EVM0020694
GO:0009166	nucleotide catabolic process	1	biological_process	EVM0015501;EVM0008752;EVM0009612;EVM0002332;EVM0022501;EVM0015304;EVM0015155;EVM0009289;EVM0020367;EVM0023734;EVM0012484;EVM0020836;EVM0012726;EVM0008102;EVM0005842;EVM0008555;EVM0008022;EVM0009516;EVM0001971;EVM0009443;EVM0020694
GO:1901292	nucleoside phosphate catabolic process	1	biological_process	EVM0015501;EVM0008752;EVM0009612;EVM0002332;EVM0022501;EVM0015304;EVM0015155;EVM0009289;EVM0020367;EVM0023734;EVM0012484;EVM0020836;EVM0012726;EVM0008102;EVM0005842;EVM0008555;EVM0008022;EVM0009516;EVM0001971;EVM0009443;EVM0020694
GO:0009154	purine ribonucleotide catabolic process	1	biological_process	EVM0015501;EVM0008752;EVM0009612;EVM0002332;EVM0022501;EVM0015304;EVM0015155;EVM0009289;EVM0020367;EVM0023734;EVM0012484;EVM0020836;EVM0012726;EVM0008102;EVM0005842;EVM0008555;EVM0008022;EVM0009516;EVM0001971;EVM0009443;EVM0020694
GO:0006195	purine nucleotide catabolic process	1	biological_process	EVM0015501;EVM0008752;EVM0009612;EVM0002332;EVM0022501;EVM0015304;EVM0015155;EVM0009289;EVM0020367;EVM0023734;EVM0012484;EVM0020836;EVM0012726;EVM0008102;EVM0005842;EVM0008555;EVM0008022;EVM0009516;EVM0001971;EVM0009443;EVM0020694
GO:0071478	cellular response to radiation	1	biological_process	EVM0001611;EVM0002020;EVM0010462;EVM0021706;EVM0000626;EVM0012871;EVM0017241;EVM0018481;EVM0001782
GO:0071482	cellular response to light stimulus	1	biological_process	EVM0001611;EVM0002020;EVM0010462;EVM0021706;EVM0000626;EVM0012871;EVM0017241;EVM0018481;EVM0001782
GO:0046130	purine ribonucleoside catabolic process	1	biological_process	EVM0015501;EVM0008752;EVM0009612;EVM0002332;EVM0022501;EVM0015304;EVM0015155;EVM0009289;EVM0020367;EVM0023734;EVM0012484;EVM0020836;EVM0012726;EVM0008102;EVM0005842;EVM0008555;EVM0008022;EVM0009516;EVM0001971;EVM0009443;EVM0020694
GO:0006977	DNA damage response, signal transduction by p53 class mediator resulting in cell cycle arrest	1	biological_process	EVM0016008;EVM0012708
GO:0071331	cellular response to hexose stimulus	1	biological_process	EVM0017617;EVM0021706
GO:0071333	cellular response to glucose stimulus	1	biological_process	EVM0017617;EVM0021706
GO:0072422	signal transduction involved in DNA damage checkpoint	1	biological_process	EVM0016008;EVM0012708
GO:0035671	enone reductase activity	1	molecular_function	EVM0003857;EVM0011060
GO:0045910	negative regulation of DNA recombination	1	biological_process	EVM0015304;EVM0015155
GO:0072395	signal transduction involved in cell cycle checkpoint	1	biological_process	EVM0016008;EVM0012708
GO:0072401	signal transduction involved in DNA integrity checkpoint	1	biological_process	EVM0016008;EVM0012708
GO:0001678	cellular glucose homeostasis	1	biological_process	EVM0017617;EVM0021706
GO:0044819	mitotic G1/S transition checkpoint	1	biological_process	EVM0016008;EVM0012708
GO:0032135	DNA insertion or deletion binding	1	molecular_function	EVM0015304;EVM0015155
GO:0042770	signal transduction in response to DNA damage	1	biological_process	EVM0016008;EVM0012708
GO:1902807	negative regulation of cell cycle G1/S phase transition	1	biological_process	EVM0016008;EVM0012708
GO:0044783	G1 DNA damage checkpoint	1	biological_process	EVM0016008;EVM0012708
GO:0071326	cellular response to monosaccharide stimulus	1	biological_process	EVM0017617;EVM0021706
GO:2000134	negative regulation of G1/S transition of mitotic cell cycle	1	biological_process	EVM0016008;EVM0012708
GO:0071158	positive regulation of cell cycle arrest	1	biological_process	EVM0016008;EVM0012708
GO:0071156	regulation of cell cycle arrest	1	biological_process	EVM0016008;EVM0012708
GO:0031571	mitotic G1 DNA damage checkpoint	1	biological_process	EVM0016008;EVM0012708
GO:0072431	signal transduction involved in mitotic G1 DNA damage checkpoint	1	biological_process	EVM0016008;EVM0012708
GO:0010077	maintenance of inflorescence meristem identity	1	biological_process	EVM0020033;EVM0008555
GO:0072413	signal transduction involved in mitotic cell cycle checkpoint	1	biological_process	EVM0016008;EVM0012708
GO:0000217	DNA secondary structure binding	1	molecular_function	EVM0015304;EVM0015155
GO:1902402	signal transduction involved in mitotic DNA damage checkpoint	1	biological_process	EVM0016008;EVM0012708
GO:1902403	signal transduction involved in mitotic DNA integrity checkpoint	1	biological_process	EVM0016008;EVM0012708
GO:1902400	intracellular signal transduction involved in G1 DNA damage checkpoint	1	biological_process	EVM0016008;EVM0012708
GO:0015867	ATP transport	1	biological_process	EVM0004238;EVM0008800
GO:0030330	DNA damage response, signal transduction by p53 class mediator	1	biological_process	EVM0016008;EVM0012708
GO:0097190	apoptotic signaling pathway	1	biological_process	EVM0015304;EVM0001971
GO:0048455	stamen formation	1	biological_process	EVM0008849;EVM0021316
GO:0043570	maintenance of DNA repeat elements	1	biological_process	EVM0015304;EVM0015155
GO:0043170	macromolecule metabolic process	1	biological_process	EVM0013628;EVM0002102;EVM0009813;EVM0005101;EVM0014427;EVM0014353;EVM0002915;EVM0006011;EVM0008978;EVM0008990;EVM0018863;EVM0010441;EVM0017833;EVM0015369;EVM0009612;EVM0023483;EVM0011944;EVM0005686;EVM0010872;EVM0010278;EVM0000265;EVM0003049;EVM0024588;EVM0023292;EVM0002020;EVM0023101;EVM0022853;EVM0016852;EVM0001636;EVM0010793;EVM0000272;EVM0015304;EVM0001134;EVM0015155;EVM0006834;EVM0014370;EVM…
GO:0051119	sugar transmembrane transporter activity	1	molecular_function	EVM0004729;EVM0008373;EVM0022157;EVM0019154;EVM0016127
GO:0072329	monocarboxylic acid catabolic process	1	biological_process	EVM0005280;EVM0004238;EVM0024272;EVM0008800;EVM0014270
GO:0006152	purine nucleoside catabolic process	1	biological_process	EVM0015501;EVM0008752;EVM0009612;EVM0002332;EVM0022501;EVM0015304;EVM0015155;EVM0009289;EVM0020367;EVM0023734;EVM0012484;EVM0020836;EVM0012726;EVM0008102;EVM0005842;EVM0008555;EVM0008022;EVM0009516;EVM0001971;EVM0009443;EVM0020694
GO:0006635	fatty acid beta-oxidation	1	biological_process	EVM0005280;EVM0004238;EVM0008800;EVM0014270
GO:0045892	negative regulation of transcription, DNA-templated	1	biological_process	EVM0006914;EVM0014427;EVM0001611;EVM0005435;EVM0001124;EVM0005567;EVM0020033;EVM0023138;EVM0001672;EVM0017355;EVM0008005;EVM0008555;EVM0009452;EVM0022257
GO:1903507	negative regulation of nucleic acid-templated transcription	1	biological_process	EVM0006914;EVM0014427;EVM0001611;EVM0005435;EVM0001124;EVM0005567;EVM0020033;EVM0023138;EVM0001672;EVM0017355;EVM0008005;EVM0008555;EVM0009452;EVM0022257
GO:1902679	negative regulation of RNA biosynthetic process	1	biological_process	EVM0006914;EVM0014427;EVM0001611;EVM0005435;EVM0001124;EVM0005567;EVM0020033;EVM0023138;EVM0001672;EVM0017355;EVM0008005;EVM0008555;EVM0009452;EVM0022257
GO:0051253	negative regulation of RNA metabolic process	1	biological_process	EVM0006914;EVM0014427;EVM0001611;EVM0005435;EVM0001124;EVM0005567;EVM0020033;EVM0023138;EVM0001672;EVM0017355;EVM0008005;EVM0008555;EVM0009452;EVM0022257
GO:0009164	nucleoside catabolic process	1	biological_process	EVM0015501;EVM0008752;EVM0009612;EVM0002332;EVM0022501;EVM0015304;EVM0015155;EVM0009289;EVM0020367;EVM0023734;EVM0012484;EVM0020836;EVM0012726;EVM0008102;EVM0005842;EVM0008555;EVM0008022;EVM0009516;EVM0001971;EVM0009443;EVM0020694
GO:0042454	ribonucleoside catabolic process	1	biological_process	EVM0015501;EVM0008752;EVM0009612;EVM0002332;EVM0022501;EVM0015304;EVM0015155;EVM0009289;EVM0020367;EVM0023734;EVM0012484;EVM0020836;EVM0012726;EVM0008102;EVM0005842;EVM0008555;EVM0008022;EVM0009516;EVM0001971;EVM0009443;EVM0020694
GO:0016765	transferase activity, transferring alkyl or aryl (other than methyl) groups	1	molecular_function	EVM0009784;EVM0023861;EVM0009600;EVM0001120;EVM0006281;EVM0019155;EVM0002980;EVM0001547;EVM0019677
GO:0072523	purine-containing compound catabolic process	1	biological_process	EVM0015501;EVM0008752;EVM0009612;EVM0002332;EVM0022501;EVM0015304;EVM0015155;EVM0009289;EVM0020367;EVM0023734;EVM0012484;EVM0020836;EVM0012726;EVM0008102;EVM0005842;EVM0008555;EVM0008022;EVM0009516;EVM0001971;EVM0009443;EVM0020694
GO:0051181	cofactor transport	1	biological_process	EVM0012643;EVM0012251;EVM0012726
GO:0034399	nuclear periphery	1	cellular_component	EVM0022691;EVM0020321;EVM0001501
GO:0032592	integral component of mitochondrial membrane	1	cellular_component	EVM0017617;EVM0019212;EVM0015124
GO:0031307	integral component of mitochondrial outer membrane	1	cellular_component	EVM0017617;EVM0019212;EVM0015124
GO:0031306	intrinsic component of mitochondrial outer membrane	1	cellular_component	EVM0017617;EVM0019212;EVM0015124
GO:0042594	response to starvation	1	biological_process	EVM0023101;EVM0003240;EVM0014413;EVM0019378;EVM0015916;EVM0017962;EVM0017825;EVM0014985;EVM0019960;EVM0012160;EVM0011478

## Sheet: Low temperature  48h
id	description	p_fdr	namespace	genes_in_study
GO:0009414	response to water deprivation	0	biological_process	EVM0010829;EVM0009169;EVM0015409;EVM0013310;EVM0003043;EVM0009600;EVM0009603;EVM0023101;EVM0001120;EVM0016858;EVM0022220;EVM0014141;EVM0003672;EVM0023117;EVM0023595;EVM0022157;EVM0003666;EVM0003065;EVM0011904;EVM0001421;EVM0000296;EVM0008414;EVM0018368;EVM0024392;EVM0006281;EVM0011746;EVM0019155;EVM0010429;EVM0008295;EVM0022622;EVM0012726;EVM0023400;EVM0020757;EVM0019606;EVM0013976;EVM0001547;EVM…
GO:0009415	response to water	0	biological_process	EVM0010829;EVM0009169;EVM0015409;EVM0013310;EVM0003043;EVM0009600;EVM0009603;EVM0023101;EVM0001120;EVM0016858;EVM0022220;EVM0014141;EVM0003672;EVM0023117;EVM0023595;EVM0022157;EVM0003666;EVM0003065;EVM0011904;EVM0001421;EVM0000296;EVM0008414;EVM0018368;EVM0024392;EVM0006281;EVM0011746;EVM0019155;EVM0010429;EVM0008295;EVM0022622;EVM0012726;EVM0023400;EVM0020757;EVM0019606;EVM0013976;EVM0001547;EVM…
GO:2000112	regulation of cellular macromolecule biosynthetic process	0.004	biological_process	EVM0013628;EVM0006000;EVM0019509;EVM0008304;EVM0015503;EVM0003636;EVM0003985;EVM0024047;EVM0004726;EVM0007165;EVM0016409;EVM0013106;EVM0016665;EVM0008686;EVM0008374;EVM0005842;EVM0020328;EVM0008201;EVM0020219;EVM0012750;EVM0018861;EVM0005110;EVM0018464;EVM0002907;EVM0001611;EVM0009363;EVM0019308;EVM0024202;EVM0010611;EVM0015563;EVM0008005;EVM0024062;EVM0005435;EVM0000733;EVM0016685;EVM0018063;EVM…
GO:0009889	regulation of biosynthetic process	0.004	biological_process	EVM0013628;EVM0006000;EVM0019509;EVM0008304;EVM0015503;EVM0003636;EVM0003985;EVM0024047;EVM0004726;EVM0007165;EVM0016409;EVM0013106;EVM0016665;EVM0008686;EVM0008374;EVM0005842;EVM0020328;EVM0008201;EVM0020219;EVM0012750;EVM0018861;EVM0005110;EVM0018464;EVM0002907;EVM0001611;EVM0009363;EVM0019308;EVM0024202;EVM0010611;EVM0015563;EVM0008005;EVM0024062;EVM0022190;EVM0005435;EVM0000733;EVM0016685;EVM…
GO:0010468	regulation of gene expression	0.004	biological_process	EVM0013628;EVM0006000;EVM0019509;EVM0008304;EVM0022440;EVM0015503;EVM0003636;EVM0003985;EVM0024047;EVM0004726;EVM0007165;EVM0016409;EVM0013106;EVM0016665;EVM0008686;EVM0008374;EVM0005842;EVM0020328;EVM0008201;EVM0020219;EVM0012750;EVM0018861;EVM0005110;EVM0018464;EVM0002907;EVM0001611;EVM0009363;EVM0019308;EVM0024202;EVM0010611;EVM0015563;EVM0008005;EVM0024062;EVM0005435;EVM0000733;EVM0016685;EVM…
GO:0019219	regulation of nucleobase-containing compound metabolic process	0.004	biological_process	EVM0006000;EVM0019509;EVM0007516;EVM0008304;EVM0015503;EVM0003636;EVM0003985;EVM0024047;EVM0004726;EVM0007165;EVM0016409;EVM0013106;EVM0016665;EVM0008686;EVM0008374;EVM0020328;EVM0008201;EVM0020219;EVM0012750;EVM0018861;EVM0005110;EVM0018464;EVM0002907;EVM0001611;EVM0009363;EVM0019308;EVM0024202;EVM0010611;EVM0015563;EVM0008005;EVM0024062;EVM0022190;EVM0005435;EVM0000733;EVM0016685;EVM0018063;EVM…
GO:2001141	regulation of RNA biosynthetic process	0.004	biological_process	EVM0006000;EVM0019509;EVM0008304;EVM0015503;EVM0003636;EVM0003985;EVM0024047;EVM0004726;EVM0007165;EVM0016409;EVM0013106;EVM0016665;EVM0008686;EVM0020328;EVM0008201;EVM0020219;EVM0012750;EVM0018861;EVM0005110;EVM0018464;EVM0002907;EVM0001611;EVM0009363;EVM0019308;EVM0024202;EVM0010611;EVM0015563;EVM0008005;EVM0024062;EVM0022190;EVM0005435;EVM0000733;EVM0016685;EVM0018063;EVM0021639;EVM0003043;EVM…
GO:0051171	regulation of nitrogen compound metabolic process	0.004	biological_process	EVM0013628;EVM0006000;EVM0019509;EVM0007516;EVM0008304;EVM0015503;EVM0003636;EVM0003985;EVM0024047;EVM0004726;EVM0007165;EVM0016409;EVM0013106;EVM0016665;EVM0008686;EVM0008374;EVM0005842;EVM0020328;EVM0008201;EVM0020219;EVM0012750;EVM0018861;EVM0005110;EVM0018464;EVM0002907;EVM0001611;EVM0009363;EVM0019308;EVM0024202;EVM0010611;EVM0015563;EVM0008005;EVM0024062;EVM0022190;EVM0005435;EVM0000733;EVM…
GO:0051252	regulation of RNA metabolic process	0.004	biological_process	EVM0006000;EVM0019509;EVM0008304;EVM0015503;EVM0003636;EVM0003985;EVM0024047;EVM0004726;EVM0007165;EVM0016409;EVM0013106;EVM0016665;EVM0008686;EVM0008374;EVM0020328;EVM0008201;EVM0020219;EVM0012750;EVM0018861;EVM0005110;EVM0018464;EVM0002907;EVM0001611;EVM0009363;EVM0019308;EVM0024202;EVM0010611;EVM0015563;EVM0008005;EVM0024062;EVM0022190;EVM0005435;EVM0000733;EVM0016685;EVM0018063;EVM0021639;EVM…
GO:0031326	regulation of cellular biosynthetic process	0.004	biological_process	EVM0013628;EVM0006000;EVM0019509;EVM0008304;EVM0015503;EVM0003636;EVM0003985;EVM0024047;EVM0004726;EVM0007165;EVM0016409;EVM0013106;EVM0016665;EVM0008686;EVM0008374;EVM0005842;EVM0020328;EVM0008201;EVM0020219;EVM0012750;EVM0018861;EVM0005110;EVM0018464;EVM0002907;EVM0001611;EVM0009363;EVM0019308;EVM0024202;EVM0010611;EVM0015563;EVM0008005;EVM0024062;EVM0022190;EVM0005435;EVM0000733;EVM0016685;EVM…
GO:0010556	regulation of macromolecule biosynthetic process	0.004	biological_process	EVM0013628;EVM0006000;EVM0019509;EVM0008304;EVM0015503;EVM0003636;EVM0003985;EVM0024047;EVM0004726;EVM0007165;EVM0016409;EVM0013106;EVM0016665;EVM0008686;EVM0008374;EVM0005842;EVM0020328;EVM0008201;EVM0020219;EVM0012750;EVM0018861;EVM0005110;EVM0018464;EVM0002907;EVM0001611;EVM0009363;EVM0019308;EVM0024202;EVM0010611;EVM0015563;EVM0008005;EVM0024062;EVM0022190;EVM0005435;EVM0000733;EVM0016685;EVM…
GO:0006355	regulation of transcription, DNA-templated	0.004	biological_process	EVM0006000;EVM0019509;EVM0008304;EVM0015503;EVM0003636;EVM0003985;EVM0024047;EVM0004726;EVM0007165;EVM0016409;EVM0013106;EVM0016665;EVM0008686;EVM0020328;EVM0008201;EVM0020219;EVM0012750;EVM0018861;EVM0005110;EVM0018464;EVM0002907;EVM0001611;EVM0009363;EVM0019308;EVM0024202;EVM0010611;EVM0015563;EVM0008005;EVM0024062;EVM0005435;EVM0000733;EVM0016685;EVM0018063;EVM0021639;EVM0003043;EVM0003042;EVM…
GO:1903506	regulation of nucleic acid-templated transcription	0.004	biological_process	EVM0006000;EVM0019509;EVM0008304;EVM0015503;EVM0003636;EVM0003985;EVM0024047;EVM0004726;EVM0007165;EVM0016409;EVM0013106;EVM0016665;EVM0008686;EVM0020328;EVM0008201;EVM0020219;EVM0012750;EVM0018861;EVM0005110;EVM0018464;EVM0002907;EVM0001611;EVM0009363;EVM0019308;EVM0024202;EVM0010611;EVM0015563;EVM0008005;EVM0024062;EVM0005435;EVM0000733;EVM0016685;EVM0018063;EVM0021639;EVM0003043;EVM0003042;EVM…
GO:0010035	response to inorganic substance	0.004	biological_process	EVM0019880;EVM0010829;EVM0009169;EVM0022440;EVM0020663;EVM0018481;EVM0015409;EVM0014882;EVM0013310;EVM0009610;EVM0020179;EVM0004143;EVM0003043;EVM0003042;EVM0009600;EVM0009603;EVM0023101;EVM0001120;EVM0016858;EVM0007026;EVM0022220;EVM0006730;EVM0021753;EVM0014141;EVM0003672;EVM0002512;EVM0023117;EVM0023595;EVM0001138;EVM0022157;EVM0003666;EVM0003065;EVM0011904;EVM0020497;EVM0017547;EVM0001421;EVM…
GO:0031323	regulation of cellular metabolic process	0.004	biological_process	EVM0013628;EVM0006000;EVM0019509;EVM0007516;EVM0008304;EVM0015503;EVM0003636;EVM0003985;EVM0024047;EVM0004726;EVM0007165;EVM0018481;EVM0016409;EVM0013106;EVM0016665;EVM0008686;EVM0008374;EVM0005842;EVM0020328;EVM0008201;EVM0020219;EVM0012750;EVM0018861;EVM0005110;EVM0018464;EVM0002907;EVM0001611;EVM0009363;EVM0019308;EVM0024202;EVM0010611;EVM0015563;EVM0009612;EVM0008005;EVM0024062;EVM0022190;EVM…
GO:0060255	regulation of macromolecule metabolic process	0.004	biological_process	EVM0013628;EVM0006000;EVM0019509;EVM0008304;EVM0022440;EVM0015503;EVM0003636;EVM0003985;EVM0024047;EVM0004726;EVM0007165;EVM0018481;EVM0016409;EVM0013106;EVM0016665;EVM0008686;EVM0008374;EVM0005842;EVM0020328;EVM0008201;EVM0020219;EVM0012750;EVM0018861;EVM0005110;EVM0018464;EVM0002907;EVM0001611;EVM0009363;EVM0019308;EVM0024202;EVM0010611;EVM0015563;EVM0008005;EVM0024062;EVM0022190;EVM0005435;EVM…
GO:0009628	response to abiotic stimulus	0.004	biological_process	EVM0013628;EVM0019880;EVM0010829;EVM0009169;EVM0022440;EVM0015503;EVM0002102;EVM0003450;EVM0020663;EVM0012742;EVM0018481;EVM0016409;EVM0001355;EVM0013741;EVM0022691;EVM0015409;EVM0002664;EVM0020210;EVM0018861;EVM0013986;EVM0002483;EVM0005598;EVM0001611;EVM0004888;EVM0013310;EVM0020693;EVM0009967;EVM0003294;EVM0006039;EVM0018063;EVM0003043;EVM0003042;EVM0020582;EVM0009600;EVM0009603;EVM0002028;EVM…
GO:0001101	response to acid chemical	0.004	biological_process	EVM0010829;EVM0009169;EVM0003450;EVM0008686;EVM0015751;EVM0003626;EVM0015409;EVM0020210;EVM0014882;EVM0013790;EVM0013310;EVM0017833;EVM0003294;EVM0005435;EVM0016685;EVM0003043;EVM0003042;EVM0014771;EVM0009600;EVM0009603;EVM0002028;EVM0023101;EVM0001120;EVM0016858;EVM0005423;EVM0001258;EVM0022220;EVM0019212;EVM0014141;EVM0003672;EVM0003671;EVM0023069;EVM0023117;EVM0023595;EVM0020029;EVM0017790;EVM…
GO:0080090	regulation of primary metabolic process	0.004	biological_process	EVM0013628;EVM0006000;EVM0019509;EVM0007516;EVM0008304;EVM0015503;EVM0003636;EVM0003985;EVM0024047;EVM0004726;EVM0007165;EVM0018481;EVM0016409;EVM0013106;EVM0016665;EVM0008686;EVM0008374;EVM0005842;EVM0020328;EVM0008201;EVM0020219;EVM0012750;EVM0018861;EVM0005110;EVM0018464;EVM0002907;EVM0001611;EVM0009363;EVM0019308;EVM0024202;EVM0010611;EVM0015563;EVM0009612;EVM0008005;EVM0024062;EVM0022190;EVM…
GO:0019222	regulation of metabolic process	0.004	biological_process	EVM0013628;EVM0006000;EVM0019509;EVM0007516;EVM0008304;EVM0022440;EVM0015503;EVM0003636;EVM0003985;EVM0024047;EVM0004726;EVM0007165;EVM0018481;EVM0016409;EVM0013106;EVM0016665;EVM0008686;EVM0008374;EVM0005842;EVM0020328;EVM0008201;EVM0020219;EVM0012750;EVM0018861;EVM0005110;EVM0018464;EVM0002907;EVM0001611;EVM0009363;EVM0019308;EVM0024202;EVM0010611;EVM0015563;EVM0009612;EVM0008005;EVM0024062;EVM…
GO:0050794	regulation of cellular process	0.004	biological_process	EVM0013628;EVM0006000;EVM0019509;EVM0017617;EVM0010829;EVM0000237;EVM0007516;EVM0008304;EVM0022440;EVM0015503;EVM0003636;EVM0003985;EVM0024047;EVM0004726;EVM0007165;EVM0018481;EVM0016409;EVM0013106;EVM0001355;EVM0016665;EVM0001755;EVM0008686;EVM0006761;EVM0008374;EVM0005842;EVM0020328;EVM0008201;EVM0008756;EVM0020219;EVM0012750;EVM0018861;EVM0005110;EVM0018464;EVM0002907;EVM0001611;EVM0001924;EVM…
GO:1901700	response to oxygen-containing compound	0.004	biological_process	EVM0017617;EVM0010829;EVM0009169;EVM0003450;EVM0018481;EVM0008686;EVM0015751;EVM0003626;EVM0015409;EVM0020210;EVM0014882;EVM0013790;EVM0013310;EVM0017833;EVM0003294;EVM0020179;EVM0005435;EVM0016685;EVM0003043;EVM0003042;EVM0014771;EVM0009600;EVM0009603;EVM0002028;EVM0023101;EVM0001120;EVM0016858;EVM0005423;EVM0000723;EVM0001258;EVM0022220;EVM0006730;EVM0019212;EVM0014141;EVM0003672;EVM0003671;EVM…
GO:0065007	biological regulation	0.004	biological_process	EVM0013628;EVM0019880;EVM0006000;EVM0019509;EVM0017617;EVM0010829;EVM0000237;EVM0007516;EVM0008304;EVM0022440;EVM0015503;EVM0003636;EVM0003985;EVM0024047;EVM0004726;EVM0007165;EVM0018481;EVM0016409;EVM0013106;EVM0001355;EVM0016665;EVM0001755;EVM0013639;EVM0008686;EVM0006761;EVM0008374;EVM0005842;EVM0020328;EVM0008201;EVM0008756;EVM0020219;EVM0020210;EVM0012750;EVM0018861;EVM0005110;EVM0018464;EVM…
GO:0050789	regulation of biological process	0.004	biological_process	EVM0013628;EVM0006000;EVM0019509;EVM0017617;EVM0010829;EVM0000237;EVM0007516;EVM0008304;EVM0022440;EVM0015503;EVM0003636;EVM0003985;EVM0024047;EVM0004726;EVM0007165;EVM0018481;EVM0016409;EVM0013106;EVM0001355;EVM0016665;EVM0001755;EVM0013639;EVM0008686;EVM0006761;EVM0008374;EVM0005842;EVM0020328;EVM0008201;EVM0008756;EVM0020219;EVM0020210;EVM0012750;EVM0018861;EVM0005110;EVM0018464;EVM0002907;EVM…
GO:0005634	nucleus	0.004	cellular_component	EVM0005263;EVM0013113;EVM0001348;EVM0013628;EVM0004190;EVM0019647;EVM0019509;EVM0021412;EVM0017617;EVM0014997;EVM0003529;EVM0008304;EVM0009169;EVM0022440;EVM0023332;EVM0003636;EVM0003985;EVM0024047;EVM0020663;EVM0004726;EVM0007165;EVM0016409;EVM0013106;EVM0019659;EVM0016665;EVM0020681;EVM0008686;EVM0022691;EVM0008374;EVM0008375;EVM0005842;EVM0018314;EVM0015577;EVM0020322;EVM0020321;EVM0008756;EVM…
GO:0005886	plasma membrane	0.004	cellular_component	EVM0005963;EVM0005263;EVM0005465;EVM0004842;EVM0019880;EVM0017073;EVM0022319;EVM0000237;EVM0003521;EVM0014746;EVM0014744;EVM0021795;EVM0022440;EVM0020663;EVM0006583;EVM0004729;EVM0004726;EVM0016081;EVM0022869;EVM0018481;EVM0005589;EVM0002915;EVM0013741;EVM0006011;EVM0013250;EVM0014248;EVM0009481;EVM0009550;EVM0018266;EVM0014022;EVM0010077;EVM0008688;EVM0023909;EVM0024125;EVM0020321;EVM0004103;EVM…
GO:0050896	response to stimulus	0.004	biological_process	EVM0013628;EVM0014819;EVM0019880;EVM0022319;EVM0017617;EVM0010829;EVM0014744;EVM0008304;EVM0009169;EVM0022440;EVM0015503;EVM0002102;EVM0003450;EVM0020663;EVM0012742;EVM0004726;EVM0007165;EVM0018481;EVM0016409;EVM0001355;EVM0013741;EVM0020681;EVM0008686;EVM0022691;EVM0006761;EVM0005842;EVM0015751;EVM0003626;EVM0020322;EVM0004103;EVM0008756;EVM0015409;EVM0002664;EVM0020210;EVM0014882;EVM0018863;EVM…
GO:0001071	nucleic acid binding transcription factor activity	0.004	molecular_function	EVM0006000;EVM0019509;EVM0008304;EVM0003636;EVM0003985;EVM0024047;EVM0004726;EVM0007165;EVM0016409;EVM0013106;EVM0016665;EVM0008201;EVM0020219;EVM0018861;EVM0005110;EVM0018464;EVM0002907;EVM0009363;EVM0019308;EVM0024202;EVM0010611;EVM0015563;EVM0024062;EVM0005435;EVM0000733;EVM0016685;EVM0018063;EVM0021639;EVM0003043;EVM0003042;EVM0009603;EVM0021161;EVM0000723;EVM0001258;EVM0021627;EVM0023843;EVM…
GO:0003674	molecular_function	0.004	molecular_function	EVM0013113;EVM0004842;EVM0021896;EVM0021899;EVM0013628;EVM0019880;EVM0006000;EVM0022319;EVM0019509;EVM0017617;EVM0000237;EVM0009836;EVM0014031;EVM0008304;EVM0003636;EVM0024130;EVM0002102;EVM0003985;EVM0024047;EVM0004729;EVM0004726;EVM0007360;EVM0007165;EVM0018481;EVM0005101;EVM0016409;EVM0013106;EVM0005586;EVM0001355;EVM0002915;EVM0016665;EVM0013030;EVM0013741;EVM0006011;EVM0013639;EVM0009550;EVM…
GO:0006950	response to stress	0.004	biological_process	EVM0013628;EVM0014819;EVM0019880;EVM0010829;EVM0014744;EVM0008304;EVM0009169;EVM0022440;EVM0002102;EVM0003450;EVM0020663;EVM0013741;EVM0020681;EVM0022691;EVM0006761;EVM0005842;EVM0003626;EVM0020322;EVM0004103;EVM0008756;EVM0015409;EVM0020210;EVM0014882;EVM0018863;EVM0018861;EVM0013986;EVM0002483;EVM0004888;EVM0013310;EVM0010840;EVM0009967;EVM0015187;EVM0003294;EVM0019339;EVM0009802;EVM0003043;EVM…
GO:0008150	biological_process	0.004	biological_process	EVM0004842;EVM0021896;EVM0021899;EVM0013628;EVM0014819;EVM0019880;EVM0006000;EVM0022319;EVM0019509;EVM0017617;EVM0010829;EVM0000237;EVM0007516;EVM0009836;EVM0014031;EVM0014744;EVM0008304;EVM0009169;EVM0022440;EVM0015503;EVM0003636;EVM0024130;EVM0002102;EVM0003985;EVM0023022;EVM0003450;EVM0024047;EVM0020663;EVM0004729;EVM0012740;EVM0012742;EVM0004726;EVM0007360;EVM0007165;EVM0018481;EVM0005101;EVM…
GO:0005623	cell	0.004	cellular_component	EVM0005963;EVM0016893;EVM0005263;EVM0005465;EVM0013113;EVM0004842;EVM0001348;EVM0021896;EVM0013623;EVM0021899;EVM0013628;EVM0004190;EVM0002920;EVM0019647;EVM0019880;EVM0017073;EVM0019507;EVM0017150;EVM0022319;EVM0019509;EVM0021412;EVM0017617;EVM0000982;EVM0014997;EVM0000237;EVM0007516;EVM0009836;EVM0014031;EVM0009835;EVM0003529;EVM0003521;EVM0014746;EVM0014744;EVM0007633;EVM0008304;EVM0021795;EVM…
GO:0044464	cell part	0.004	cellular_component	EVM0005963;EVM0016893;EVM0005263;EVM0005465;EVM0013113;EVM0004842;EVM0001348;EVM0021896;EVM0013623;EVM0021899;EVM0013628;EVM0004190;EVM0002920;EVM0019647;EVM0019880;EVM0017073;EVM0019507;EVM0017150;EVM0022319;EVM0019509;EVM0021412;EVM0017617;EVM0000982;EVM0014997;EVM0000237;EVM0007516;EVM0009836;EVM0014031;EVM0009835;EVM0003529;EVM0003521;EVM0014746;EVM0014744;EVM0007633;EVM0008304;EVM0021795;EVM…
GO:0003700	transcription factor activity, sequence-specific DNA binding	0.006	molecular_function	EVM0006000;EVM0019509;EVM0008304;EVM0003636;EVM0003985;EVM0024047;EVM0004726;EVM0007165;EVM0016409;EVM0013106;EVM0016665;EVM0008201;EVM0020219;EVM0018861;EVM0005110;EVM0018464;EVM0002907;EVM0009363;EVM0019308;EVM0024202;EVM0010611;EVM0015563;EVM0024062;EVM0005435;EVM0000733;EVM0016685;EVM0018063;EVM0021639;EVM0003043;EVM0003042;EVM0009603;EVM0021161;EVM0000723;EVM0001258;EVM0021627;EVM0023843;EVM…
GO:0006970	response to osmotic stress	0.006	biological_process	EVM0013628;EVM0019880;EVM0010829;EVM0009169;EVM0002102;EVM0003450;EVM0020663;EVM0022691;EVM0020210;EVM0018861;EVM0002483;EVM0003294;EVM0003042;EVM0002028;EVM0001258;EVM0022220;EVM0014786;EVM0021753;EVM0014141;EVM0003671;EVM0023117;EVM0022157;EVM0003666;EVM0015201;EVM0011904;EVM0020497;EVM0001421;EVM0000296;EVM0018368;EVM0024392;EVM0011746;EVM0015916;EVM0003134;EVM0008064;EVM0023416;EVM0005773;EVM…
GO:0005575	cellular_component	0.006	cellular_component	EVM0005963;EVM0016893;EVM0005263;EVM0005465;EVM0013113;EVM0004842;EVM0001348;EVM0021896;EVM0013623;EVM0021899;EVM0013628;EVM0004190;EVM0002920;EVM0019647;EVM0019880;EVM0017073;EVM0010596;EVM0019507;EVM0017150;EVM0022319;EVM0019509;EVM0021412;EVM0017617;EVM0000982;EVM0014997;EVM0000237;EVM0007516;EVM0009836;EVM0014031;EVM0009835;EVM0003529;EVM0003521;EVM0014746;EVM0014744;EVM0007633;EVM0008304;EVM…
GO:0005622	intracellular	0.006	cellular_component	EVM0016893;EVM0005263;EVM0013113;EVM0001348;EVM0021896;EVM0013623;EVM0021899;EVM0013628;EVM0004190;EVM0002920;EVM0019647;EVM0019880;EVM0019507;EVM0017150;EVM0019509;EVM0021412;EVM0017617;EVM0000982;EVM0014997;EVM0007516;EVM0009836;EVM0014031;EVM0009835;EVM0003529;EVM0014746;EVM0014744;EVM0007633;EVM0008304;EVM0009169;EVM0022440;EVM0023332;EVM0003636;EVM0024130;EVM0002102;EVM0003985;EVM0023022;EVM…
GO:0044424	intracellular part	0.006	cellular_component	EVM0016893;EVM0005263;EVM0013113;EVM0001348;EVM0021896;EVM0013623;EVM0021899;EVM0013628;EVM0004190;EVM0002920;EVM0019647;EVM0019880;EVM0019507;EVM0017150;EVM0019509;EVM0021412;EVM0017617;EVM0000982;EVM0014997;EVM0007516;EVM0009836;EVM0014031;EVM0009835;EVM0003529;EVM0014746;EVM0014744;EVM0007633;EVM0008304;EVM0009169;EVM0022440;EVM0023332;EVM0003636;EVM0024130;EVM0002102;EVM0003985;EVM0023022;EVM…
GO:0030246	carbohydrate binding	0.006	molecular_function	EVM0013113;EVM0008531;EVM0003829;EVM0009661;EVM0014283;EVM0020882;EVM0015707;EVM0001209;EVM0022321
GO:1901363	heterocyclic compound binding	0.008	molecular_function	EVM0003985;EVM0001355;EVM0006011;EVM0010077;EVM0005842;EVM0008756;EVM0018861;EVM0018464;EVM0002907;EVM0001611;EVM0016697;EVM0013310;EVM0017833;EVM0014696;EVM0007767;EVM0009612;EVM0003474;EVM0002332;EVM0005435;EVM0010273;EVM0014779;EVM0013856;EVM0015555;EVM0024100;EVM0022853;EVM0021627;EVM0015304;EVM0005636;EVM0015155;EVM0012792;EVM0005155;EVM0020033;EVM0005716;EVM0017160;EVM0014413;EVM0004561;EVM…
GO:0042221	response to chemical	0.008	biological_process	EVM0019880;EVM0017617;EVM0010829;EVM0009169;EVM0022440;EVM0003450;EVM0020663;EVM0007165;EVM0018481;EVM0008686;EVM0005842;EVM0015751;EVM0003626;EVM0004103;EVM0015409;EVM0020210;EVM0014882;EVM0013790;EVM0013310;EVM0017833;EVM0018325;EVM0003294;EVM0009612;EVM0009610;EVM0008005;EVM0020179;EVM0005435;EVM0016685;EVM0018063;EVM0004143;EVM0003043;EVM0003042;EVM0014771;EVM0009600;EVM0009603;EVM0002028;EVM…
GO:0043170	macromolecule metabolic process	0.008	biological_process	EVM0013628;EVM0022440;EVM0002102;EVM0018481;EVM0005101;EVM0001355;EVM0002915;EVM0013030;EVM0006011;EVM0005842;EVM0020322;EVM0004103;EVM0008978;EVM0008756;EVM0012750;EVM0014882;EVM0018863;EVM0015560;EVM0017833;EVM0021501;EVM0009813;EVM0009612;EVM0008005;EVM0003474;EVM0023483;EVM0020179;EVM0011944;EVM0010872;EVM0010278;EVM0000265;EVM0013856;EVM0009974;EVM0024588;EVM0023101;EVM0022853;EVM0007158;EVM…
GO:0009651	response to salt stress	0.008	biological_process	EVM0013628;EVM0019880;EVM0010829;EVM0009169;EVM0002102;EVM0003450;EVM0020663;EVM0022691;EVM0020210;EVM0018861;EVM0003294;EVM0003042;EVM0002028;EVM0001258;EVM0022220;EVM0014786;EVM0021753;EVM0014141;EVM0003671;EVM0023117;EVM0022157;EVM0003666;EVM0015201;EVM0011904;EVM0020497;EVM0001421;EVM0018368;EVM0024392;EVM0011746;EVM0015916;EVM0003134;EVM0008064;EVM0023416;EVM0005773;EVM0006243;EVM0000038;EVM…
GO:0044260	cellular macromolecule metabolic process	0.012	biological_process	EVM0013628;EVM0022440;EVM0018481;EVM0005101;EVM0001355;EVM0002915;EVM0013030;EVM0006011;EVM0005842;EVM0020322;EVM0004103;EVM0008978;EVM0008756;EVM0012750;EVM0014882;EVM0018863;EVM0015560;EVM0017833;EVM0021501;EVM0009612;EVM0008005;EVM0003474;EVM0023483;EVM0020179;EVM0011944;EVM0010872;EVM0000265;EVM0013856;EVM0009974;EVM0024588;EVM0023101;EVM0022853;EVM0007158;EVM0016852;EVM0016858;EVM0013594;EVM…
GO:0031324	negative regulation of cellular metabolic process	0.012	biological_process	EVM0005842;EVM0012750;EVM0005110;EVM0001611;EVM0008005;EVM0005435;EVM0016685;EVM0006039;EVM0009646;EVM0012023;EVM0001124;EVM0015304;EVM0010932;EVM0013676;EVM0015155;EVM0011340;EVM0004371;EVM0020497;EVM0020033;EVM0004561;EVM0023138;EVM0005773;EVM0001672;EVM0014431;EVM0017355;EVM0014427;EVM0009661;EVM0014852;EVM0017661;EVM0009452;EVM0000062;EVM0023829;EVM0002308;EVM0001971;EVM0022257;EVM0008555;EVM…
GO:0006464	cellular protein modification process	0.012	biological_process	EVM0013628;EVM0018481;EVM0002915;EVM0013030;EVM0020322;EVM0012750;EVM0014882;EVM0018863;EVM0021501;EVM0023483;EVM0020179;EVM0010872;EVM0013856;EVM0024588;EVM0023101;EVM0022853;EVM0016852;EVM0001636;EVM0000657;EVM0022220;EVM0013676;EVM0008531;EVM0014353;EVM0001876;EVM0017765;EVM0021157;EVM0004637;EVM0001888;EVM0021708;EVM0008465;EVM0003134;EVM0007119;EVM0007200;EVM0001678;EVM0020836;EVM0001693;EVM…
GO:0036211	protein modification process	0.012	biological_process	EVM0013628;EVM0018481;EVM0002915;EVM0013030;EVM0020322;EVM0012750;EVM0014882;EVM0018863;EVM0021501;EVM0023483;EVM0020179;EVM0010872;EVM0013856;EVM0024588;EVM0023101;EVM0022853;EVM0016852;EVM0001636;EVM0000657;EVM0022220;EVM0013676;EVM0008531;EVM0014353;EVM0001876;EVM0017765;EVM0021157;EVM0004637;EVM0001888;EVM0021708;EVM0008465;EVM0003134;EVM0007119;EVM0007200;EVM0001678;EVM0020836;EVM0001693;EVM…
GO:0009987	cellular process	0.026	biological_process	EVM0021899;EVM0013628;EVM0019880;EVM0022319;EVM0017617;EVM0010829;EVM0009836;EVM0014031;EVM0014744;EVM0009169;EVM0022440;EVM0015503;EVM0024130;EVM0003985;EVM0023022;EVM0004729;EVM0018481;EVM0005101;EVM0001355;EVM0002915;EVM0013030;EVM0013741;EVM0006011;EVM0001755;EVM0009550;EVM0024230;EVM0008688;EVM0022691;EVM0006761;EVM0005842;EVM0020322;EVM0020321;EVM0004103;EVM0008978;EVM0008756;EVM0008752;EVM…
GO:0003676	nucleic acid binding	0.042	molecular_function	EVM0003985;EVM0006011;EVM0005842;EVM0018861;EVM0018464;EVM0002907;EVM0001611;EVM0016697;EVM0013310;EVM0017833;EVM0009612;EVM0003474;EVM0005435;EVM0014779;EVM0021627;EVM0015304;EVM0005636;EVM0015155;EVM0012792;EVM0005155;EVM0020033;EVM0005716;EVM0017160;EVM0014413;EVM0004561;EVM0018368;EVM0024392;EVM0012075;EVM0016798;EVM0011811;EVM0001672;EVM0021495;EVM0011776;EVM0002348;EVM0023400;EVM0009410;EVM…
GO:0097159	organic cyclic compound binding	0.064	molecular_function	EVM0003985;EVM0001355;EVM0006011;EVM0010077;EVM0005842;EVM0008756;EVM0018861;EVM0018464;EVM0002907;EVM0001611;EVM0016697;EVM0013310;EVM0017833;EVM0014696;EVM0007767;EVM0009612;EVM0003474;EVM0002332;EVM0005435;EVM0010273;EVM0014779;EVM0013856;EVM0015555;EVM0024100;EVM0022853;EVM0021627;EVM0015304;EVM0005636;EVM0015155;EVM0012792;EVM0005155;EVM0020033;EVM0005716;EVM0017160;EVM0014413;EVM0004561;EVM…
GO:0043412	macromolecule modification	0.066	biological_process	EVM0013628;EVM0018481;EVM0002915;EVM0013030;EVM0020322;EVM0012750;EVM0014882;EVM0018863;EVM0021501;EVM0008005;EVM0023483;EVM0020179;EVM0010872;EVM0013856;EVM0024588;EVM0023101;EVM0022853;EVM0016852;EVM0001636;EVM0000657;EVM0022220;EVM0013676;EVM0008531;EVM0011340;EVM0015937;EVM0014353;EVM0001876;EVM0017765;EVM0021157;EVM0004637;EVM0001888;EVM0021708;EVM0008465;EVM0003134;EVM0007119;EVM0007200;EVM…
GO:0010008	endosome membrane	0.066	cellular_component	EVM0019507;EVM0007767;EVM0005167;EVM0020825;EVM0000332;EVM0007200;EVM0004005;EVM0002762;EVM0011834;EVM0023184;EVM0023624;EVM0008639;EVM0023177;EVM0018133;EVM0014442;EVM0011873;EVM0006437;EVM0006749
GO:0044440	endosomal part	0.066	cellular_component	EVM0019507;EVM0007767;EVM0005167;EVM0020825;EVM0000332;EVM0007200;EVM0004005;EVM0002762;EVM0011834;EVM0023184;EVM0023624;EVM0008639;EVM0023177;EVM0018133;EVM0014442;EVM0011873;EVM0006437;EVM0006749
GO:0008186	RNA-dependent ATPase activity	0.07	molecular_function	EVM0005842;EVM0007158;EVM0014150;EVM0009289;EVM0004561;EVM0020836;EVM0011776;EVM0001971
GO:0009737	response to abscisic acid	0.074	biological_process	EVM0010829;EVM0003450;EVM0015751;EVM0020210;EVM0013790;EVM0017833;EVM0003294;EVM0005435;EVM0016685;EVM0003043;EVM0003042;EVM0001258;EVM0022220;EVM0019212;EVM0014141;EVM0003671;EVM0023069;EVM0023117;EVM0022157;EVM0013676;EVM0023611;EVM0005155;EVM0001421;EVM0014897;EVM0014170;EVM0008414;EVM0018368;EVM0019578;EVM0011746;EVM0015269;EVM0002603;EVM0023416;EVM0010429;EVM0000038;EVM0008295;EVM0022622;EVM…
GO:0004004	ATP-dependent RNA helicase activity	0.082	molecular_function	EVM0005842;EVM0007158;EVM0014150;EVM0009289;EVM0004561;EVM0011776;EVM0001971
GO:0008143	poly(A) binding	0.082	molecular_function	EVM0005842;EVM0004561;EVM0002348;EVM0011947;EVM0001971;EVM0022060;EVM0008778
GO:0005488	binding	0.086	molecular_function	EVM0013113;EVM0019880;EVM0017617;EVM0003985;EVM0001355;EVM0002915;EVM0006011;EVM0010077;EVM0005842;EVM0008756;EVM0008752;EVM0018861;EVM0018464;EVM0002907;EVM0001611;EVM0016697;EVM0013262;EVM0013310;EVM0017833;EVM0014696;EVM0020747;EVM0007767;EVM0009612;EVM0009610;EVM0003474;EVM0002332;EVM0005435;EVM0006039;EVM0002801;EVM0010651;EVM0010273;EVM0000065;EVM0014779;EVM0013856;EVM0015555;EVM0024100;EVM…
GO:0051172	negative regulation of nitrogen compound metabolic process	0.098	biological_process	EVM0005842;EVM0012750;EVM0005110;EVM0001611;EVM0008005;EVM0005435;EVM0016685;EVM0012023;EVM0001124;EVM0015304;EVM0010932;EVM0015155;EVM0011340;EVM0020497;EVM0020033;EVM0004561;EVM0023138;EVM0005773;EVM0001672;EVM0017355;EVM0014427;EVM0014852;EVM0017661;EVM0009452;EVM0002308;EVM0001971;EVM0022257;EVM0008555;EVM0020301;EVM0023783
GO:0019538	protein metabolic process	0.108	biological_process	EVM0013628;EVM0022440;EVM0002102;EVM0018481;EVM0001355;EVM0002915;EVM0013030;EVM0006011;EVM0005842;EVM0020322;EVM0004103;EVM0012750;EVM0014882;EVM0018863;EVM0015560;EVM0021501;EVM0009612;EVM0003474;EVM0023483;EVM0020179;EVM0011944;EVM0010872;EVM0010278;EVM0013856;EVM0024588;EVM0023101;EVM0022853;EVM0016852;EVM0013594;EVM0001636;EVM0000657;EVM0022220;EVM0001134;EVM0013676;EVM0008531;EVM0014353;EVM…
GO:0044238	primary metabolic process	0.114	biological_process	EVM0013628;EVM0022319;EVM0017617;EVM0014031;EVM0022440;EVM0002102;EVM0018481;EVM0005101;EVM0001355;EVM0002915;EVM0013030;EVM0006011;EVM0009550;EVM0024230;EVM0006761;EVM0005842;EVM0020322;EVM0004103;EVM0008978;EVM0008756;EVM0008752;EVM0015409;EVM0020210;EVM0012750;EVM0014882;EVM0018863;EVM0013986;EVM0015560;EVM0005280;EVM0013262;EVM0020694;EVM0019121;EVM0000417;EVM0017833;EVM0021501;EVM0014696;EVM…
GO:0070717	poly-purine tract binding	0.12	molecular_function	EVM0005842;EVM0004561;EVM0002348;EVM0011947;EVM0001971;EVM0022060;EVM0008778
GO:0033993	response to lipid	0.124	biological_process	EVM0010829;EVM0003450;EVM0018481;EVM0008686;EVM0015751;EVM0020210;EVM0013790;EVM0017833;EVM0003294;EVM0005435;EVM0016685;EVM0003043;EVM0003042;EVM0014771;EVM0002028;EVM0001258;EVM0022220;EVM0019212;EVM0014141;EVM0003671;EVM0023069;EVM0023117;EVM0022157;EVM0013676;EVM0004371;EVM0023611;EVM0005155;EVM0001421;EVM0014897;EVM0000298;EVM0014170;EVM0008414;EVM0018368;EVM0019578;EVM0011746;EVM0015269;EVM…
GO:0048523	negative regulation of cellular process	0.13	biological_process	EVM0022440;EVM0001355;EVM0005842;EVM0012750;EVM0005110;EVM0001611;EVM0008005;EVM0020179;EVM0005435;EVM0016685;EVM0006039;EVM0009646;EVM0012023;EVM0001124;EVM0015304;EVM0005636;EVM0010932;EVM0013676;EVM0015155;EVM0011340;EVM0004371;EVM0020497;EVM0020033;EVM0004561;EVM0008414;EVM0023138;EVM0004109;EVM0021236;EVM0005773;EVM0001672;EVM0001693;EVM0014431;EVM0012708;EVM0008295;EVM0012271;EVM0017355;EVM…
GO:0005829	cytosol	0.168	cellular_component	EVM0013623;EVM0004190;EVM0017150;EVM0021412;EVM0007516;EVM0022440;EVM0002102;EVM0006345;EVM0020663;EVM0004726;EVM0018879;EVM0023249;EVM0018481;EVM0006011;EVM0020258;EVM0009550;EVM0018266;EVM0005842;EVM0020322;EVM0008756;EVM0008752;EVM0012750;EVM0016187;EVM0001615;EVM0016501;EVM0005942;EVM0009363;EVM0014696;EVM0003501;EVM0003051;EVM0024202;EVM0009610;EVM0002472;EVM0016510;EVM0006039;EVM0018063;EVM…
GO:0043227	membrane-bounded organelle	0.168	cellular_component	EVM0016893;EVM0005263;EVM0013113;EVM0001348;EVM0021896;EVM0021899;EVM0013628;EVM0004190;EVM0002920;EVM0019647;EVM0019507;EVM0019509;EVM0021412;EVM0017617;EVM0000982;EVM0014997;EVM0007516;EVM0009836;EVM0014031;EVM0003529;EVM0007633;EVM0008304;EVM0009169;EVM0022440;EVM0023332;EVM0003636;EVM0024130;EVM0002102;EVM0003985;EVM0023022;EVM0024047;EVM0020663;EVM0004731;EVM0004726;EVM0007165;EVM0005101;EVM…
GO:0043231	intracellular membrane-bounded organelle	0.18	cellular_component	EVM0016893;EVM0005263;EVM0013113;EVM0001348;EVM0021896;EVM0021899;EVM0013628;EVM0004190;EVM0002920;EVM0019647;EVM0019507;EVM0019509;EVM0021412;EVM0017617;EVM0000982;EVM0014997;EVM0007516;EVM0009836;EVM0014031;EVM0003529;EVM0007633;EVM0008304;EVM0009169;EVM0022440;EVM0023332;EVM0003636;EVM0024130;EVM0002102;EVM0003985;EVM0023022;EVM0024047;EVM0020663;EVM0004731;EVM0004726;EVM0007165;EVM0005101;EVM…
GO:0044267	cellular protein metabolic process	0.212	biological_process	EVM0013628;EVM0022440;EVM0018481;EVM0001355;EVM0002915;EVM0013030;EVM0006011;EVM0005842;EVM0020322;EVM0004103;EVM0012750;EVM0014882;EVM0018863;EVM0015560;EVM0021501;EVM0009612;EVM0003474;EVM0023483;EVM0020179;EVM0011944;EVM0010872;EVM0013856;EVM0024588;EVM0023101;EVM0022853;EVM0016852;EVM0013594;EVM0001636;EVM0000657;EVM0022220;EVM0001134;EVM0013676;EVM0008531;EVM0014353;EVM0006532;EVM0001876;EVM…
GO:0097305	response to alcohol	0.216	biological_process	EVM0010829;EVM0003450;EVM0018481;EVM0015751;EVM0020210;EVM0013790;EVM0017833;EVM0003294;EVM0005435;EVM0016685;EVM0003043;EVM0003042;EVM0001258;EVM0022220;EVM0019212;EVM0014141;EVM0003671;EVM0023069;EVM0023117;EVM0022157;EVM0013676;EVM0004371;EVM0023611;EVM0005155;EVM0001421;EVM0014897;EVM0014170;EVM0008414;EVM0018368;EVM0019578;EVM0011746;EVM0015269;EVM0002603;EVM0023416;EVM0001672;EVM0010429;EVM…
GO:0004721	phosphoprotein phosphatase activity	0.216	molecular_function	EVM0019880;EVM0023069;EVM0013676;EVM0008531;EVM0017765;EVM0008414;EVM0020836;EVM0008295;EVM0023292;EVM0009661;EVM0009454;EVM0000683
GO:0080044	quercetin 7-O-glucosyltransferase activity	0.216	molecular_function	EVM0007360;EVM0002664;EVM0016510;EVM0013664;EVM0002533;EVM0017168;EVM0005207;EVM0013544;EVM0008050;EVM0005247;EVM0013826;EVM0010055
GO:0071702	organic substance transport	0.22	biological_process	EVM0004842;EVM0021899;EVM0009836;EVM0004729;EVM0008688;EVM0008756;EVM0015409;EVM0005942;EVM0004238;EVM0023313;EVM0009612;EVM0005056;EVM0002019;EVM0016866;EVM0001735;EVM0021751;EVM0022157;EVM0024272;EVM0012643;EVM0011379;EVM0012251;EVM0001463;EVM0011581;EVM0001510;EVM0019154;EVM0008067;EVM0006463;EVM0001186;EVM0022376;EVM0004343;EVM0018387;EVM0012722;EVM0012726;EVM0008109;EVM0005230;EVM0001335;EVM…
GO:0048582	positive regulation of post-embryonic development	0.226	biological_process	EVM0020210;EVM0005435;EVM0016685;EVM0013782;EVM0014413;EVM0001888;EVM0008849;EVM0020059;EVM0001678;EVM0024507;EVM0010842
GO:0044433	cytoplasmic vesicle part	0.248	cellular_component	EVM0019507;EVM0007767;EVM0009610;EVM0005167;EVM0020825;EVM0000332;EVM0007200;EVM0004005;EVM0002762;EVM0024546;EVM0003752;EVM0011834;EVM0023184;EVM0023624;EVM0008639;EVM0023177;EVM0018133;EVM0014442;EVM0011873;EVM0009529;EVM0006437;EVM0013792;EVM0006749
GO:2000113	negative regulation of cellular macromolecule biosynthetic process	0.27	biological_process	EVM0005842;EVM0012750;EVM0005110;EVM0001611;EVM0008005;EVM0005435;EVM0016685;EVM0012023;EVM0001124;EVM0010932;EVM0011340;EVM0020497;EVM0020033;EVM0004561;EVM0023138;EVM0005773;EVM0001672;EVM0017355;EVM0014427;EVM0014852;EVM0017661;EVM0009452;EVM0002308;EVM0001971;EVM0022257;EVM0008555;EVM0020301;EVM0023783
GO:0010558	negative regulation of macromolecule biosynthetic process	0.27	biological_process	EVM0005842;EVM0012750;EVM0005110;EVM0001611;EVM0008005;EVM0005435;EVM0016685;EVM0012023;EVM0001124;EVM0010932;EVM0011340;EVM0020497;EVM0020033;EVM0004561;EVM0023138;EVM0005773;EVM0001672;EVM0017355;EVM0014427;EVM0014852;EVM0017661;EVM0009452;EVM0002308;EVM0001971;EVM0022257;EVM0008555;EVM0020301;EVM0023783
GO:0043226	organelle	0.294	cellular_component	EVM0016893;EVM0005263;EVM0013113;EVM0001348;EVM0021896;EVM0021899;EVM0013628;EVM0004190;EVM0002920;EVM0019647;EVM0019507;EVM0019509;EVM0021412;EVM0017617;EVM0000982;EVM0014997;EVM0007516;EVM0009836;EVM0014031;EVM0003529;EVM0007633;EVM0008304;EVM0009169;EVM0022440;EVM0023332;EVM0003636;EVM0024130;EVM0002102;EVM0003985;EVM0023022;EVM0024047;EVM0020663;EVM0004731;EVM0004726;EVM0007165;EVM0005101;EVM…
GO:0006397	mRNA processing	0.296	biological_process	EVM0005842;EVM0007158;EVM0004561;EVM0017753;EVM0005773;EVM0020836;EVM0013299;EVM0017648;EVM0017392;EVM0016380;EVM0009322;EVM0002305;EVM0017117
GO:0043229	intracellular organelle	0.298	cellular_component	EVM0016893;EVM0005263;EVM0013113;EVM0001348;EVM0021896;EVM0021899;EVM0013628;EVM0004190;EVM0002920;EVM0019647;EVM0019507;EVM0019509;EVM0021412;EVM0017617;EVM0000982;EVM0014997;EVM0007516;EVM0009836;EVM0014031;EVM0003529;EVM0007633;EVM0008304;EVM0009169;EVM0022440;EVM0023332;EVM0003636;EVM0024130;EVM0002102;EVM0003985;EVM0023022;EVM0024047;EVM0020663;EVM0004731;EVM0004726;EVM0007165;EVM0005101;EVM…
GO:0009890	negative regulation of biosynthetic process	0.318	biological_process	EVM0005842;EVM0012750;EVM0005110;EVM0001611;EVM0008005;EVM0005435;EVM0016685;EVM0012023;EVM0001124;EVM0010932;EVM0011340;EVM0020497;EVM0020033;EVM0004561;EVM0023138;EVM0005773;EVM0001672;EVM0014431;EVM0017355;EVM0014427;EVM0014852;EVM0017661;EVM0009452;EVM0000062;EVM0002308;EVM0001971;EVM0022257;EVM0008555;EVM0020301;EVM0023783
GO:0016020	membrane	0.368	cellular_component	EVM0005963;EVM0016893;EVM0005263;EVM0005465;EVM0004842;EVM0021896;EVM0021899;EVM0019880;EVM0017073;EVM0010596;EVM0019507;EVM0022319;EVM0017617;EVM0000237;EVM0009836;EVM0003521;EVM0014746;EVM0014744;EVM0007633;EVM0021795;EVM0022440;EVM0008763;EVM0003450;EVM0020663;EVM0006583;EVM0004729;EVM0004726;EVM0018879;EVM0016081;EVM0022869;EVM0018481;EVM0005589;EVM0002915;EVM0013030;EVM0013741;EVM0006011;EVM…
GO:0080043	quercetin 3-O-glucosyltransferase activity	0.388	molecular_function	EVM0007360;EVM0002664;EVM0016510;EVM0013664;EVM0002533;EVM0017168;EVM0005207;EVM0013544;EVM0008050;EVM0005247;EVM0013826;EVM0010055
GO:0004672	protein kinase activity	0.394	molecular_function	EVM0013628;EVM0002915;EVM0014882;EVM0018863;EVM0021501;EVM0020179;EVM0010872;EVM0013856;EVM0000657;EVM0022220;EVM0014353;EVM0021157;EVM0001888;EVM0021708;EVM0008465;EVM0003134;EVM0007200;EVM0001678;EVM0012610;EVM0002349;EVM0016978;EVM0001449;EVM0001440;EVM0011941;EVM0000636;EVM0013976;EVM0021023;EVM0020088;EVM0013415;EVM0017241;EVM0010793;EVM0006935;EVM0021316;EVM0006216;EVM0016732;EVM0022327;EVM…
GO:0006810	transport	0.492	biological_process	EVM0004842;EVM0021899;EVM0017617;EVM0009836;EVM0004729;EVM0008688;EVM0020321;EVM0008756;EVM0008752;EVM0015409;EVM0002483;EVM0005942;EVM0004238;EVM0006713;EVM0023313;EVM0007767;EVM0009612;EVM0005056;EVM0002019;EVM0016866;EVM0001735;EVM0022501;EVM0020165;EVM0013460;EVM0021751;EVM0005636;EVM0022157;EVM0024272;EVM0012643;EVM0006195;EVM0020708;EVM0011379;EVM0023734;EVM0012251;EVM0005167;EVM0005761;EVM…
GO:0051179	localization	0.518	biological_process	EVM0004842;EVM0021899;EVM0017617;EVM0009836;EVM0004729;EVM0008688;EVM0005842;EVM0020321;EVM0008756;EVM0008752;EVM0015409;EVM0002483;EVM0005942;EVM0004238;EVM0006713;EVM0023313;EVM0007767;EVM0009612;EVM0005056;EVM0002019;EVM0016866;EVM0001735;EVM0022501;EVM0020165;EVM0013460;EVM0021751;EVM0005636;EVM0022157;EVM0024272;EVM0012643;EVM0006195;EVM0020708;EVM0004561;EVM0011379;EVM0023734;EVM0012251;EVM…
GO:0044699	single-organism process	0.522	biological_process	EVM0004842;EVM0021899;EVM0019880;EVM0022319;EVM0017617;EVM0010829;EVM0000237;EVM0007516;EVM0009836;EVM0014031;EVM0014744;EVM0009169;EVM0022440;EVM0015503;EVM0003985;EVM0004729;EVM0012740;EVM0018481;EVM0005101;EVM0001355;EVM0016665;EVM0013741;EVM0006011;EVM0001755;EVM0009550;EVM0024230;EVM0008688;EVM0008686;EVM0006761;EVM0008374;EVM0005842;EVM0020321;EVM0004103;EVM0008978;EVM0008756;EVM0008752;EVM…
GO:0051234	establishment of localization	0.546	biological_process	EVM0004842;EVM0021899;EVM0017617;EVM0009836;EVM0004729;EVM0008688;EVM0020321;EVM0008756;EVM0008752;EVM0015409;EVM0002483;EVM0005942;EVM0004238;EVM0006713;EVM0023313;EVM0007767;EVM0009612;EVM0005056;EVM0002019;EVM0016866;EVM0001735;EVM0022501;EVM0020165;EVM0013460;EVM0021751;EVM0005636;EVM0022157;EVM0024272;EVM0012643;EVM0006195;EVM0020708;EVM0011379;EVM0023734;EVM0012251;EVM0005167;EVM0005761;EVM…
GO:0070035	purine NTP-dependent helicase activity	0.546	molecular_function	EVM0005842;EVM0007158;EVM0014150;EVM0009289;EVM0004561;EVM0011776;EVM0001971
GO:0008026	ATP-dependent helicase activity	0.546	molecular_function	EVM0005842;EVM0007158;EVM0014150;EVM0009289;EVM0004561;EVM0011776;EVM0001971
GO:0010605	negative regulation of macromolecule metabolic process	0.572	biological_process	EVM0005842;EVM0012750;EVM0005110;EVM0001611;EVM0008005;EVM0005435;EVM0016685;EVM0006039;EVM0009646;EVM0012023;EVM0001124;EVM0015304;EVM0010932;EVM0013676;EVM0015155;EVM0009289;EVM0011340;EVM0020497;EVM0020033;EVM0000456;EVM0004561;EVM0023138;EVM0005773;EVM0001672;EVM0017355;EVM0014427;EVM0009661;EVM0014852;EVM0017392;EVM0017661;EVM0023740;EVM0016389;EVM0009452;EVM0023829;EVM0002308;EVM0001971;EVM…
GO:0071704	organic substance metabolic process	0.586	biological_process	EVM0013628;EVM0022319;EVM0017617;EVM0014031;EVM0022440;EVM0002102;EVM0018481;EVM0005101;EVM0001355;EVM0002915;EVM0013030;EVM0006011;EVM0009550;EVM0024230;EVM0006761;EVM0005842;EVM0020322;EVM0004103;EVM0008978;EVM0008756;EVM0008752;EVM0015409;EVM0002664;EVM0020210;EVM0012750;EVM0014882;EVM0018863;EVM0013986;EVM0015560;EVM0005280;EVM0013262;EVM0020694;EVM0019121;EVM0000417;EVM0017833;EVM0021501;EVM…
GO:0009743	response to carbohydrate	0.596	biological_process	EVM0017617;EVM0020210;EVM0020179;EVM0016685;EVM0016858;EVM0020497;EVM0012075;EVM0018283;EVM0021706;EVM0014431;EVM0015396;EVM0004833;EVM0016434;EVM0000062;EVM0002231;EVM0021860
GO:0016740	transferase activity	0.596	molecular_function	EVM0021896;EVM0013628;EVM0017617;EVM0007360;EVM0005101;EVM0002915;EVM0013030;EVM0013741;EVM0024230;EVM0020322;EVM0002664;EVM0020210;EVM0014882;EVM0018863;EVM0019121;EVM0021501;EVM0009967;EVM0023483;EVM0020179;EVM0016510;EVM0010872;EVM0013856;EVM0024100;EVM0009600;EVM0024588;EVM0023101;EVM0001120;EVM0016858;EVM0001636;EVM0000657;EVM0007026;EVM0013664;EVM0022220;EVM0015896;EVM0003702;EVM0007233;EVM…
GO:0006468	protein phosphorylation	0.598	biological_process	EVM0013628;EVM0002915;EVM0014882;EVM0018863;EVM0021501;EVM0020179;EVM0010872;EVM0013856;EVM0016852;EVM0000657;EVM0022220;EVM0014353;EVM0021157;EVM0001888;EVM0021708;EVM0008465;EVM0003134;EVM0007200;EVM0001678;EVM0012610;EVM0002349;EVM0016978;EVM0001449;EVM0001440;EVM0011941;EVM0000636;EVM0013976;EVM0021023;EVM0020088;EVM0013415;EVM0017241;EVM0010793;EVM0006935;EVM0021316;EVM0006216;EVM0016732;EVM…
GO:0016758	transferase activity, transferring hexosyl groups	0.61	molecular_function	EVM0021896;EVM0007360;EVM0013741;EVM0002664;EVM0009967;EVM0016510;EVM0016858;EVM0013664;EVM0002533;EVM0017168;EVM0021706;EVM0005207;EVM0001693;EVM0012876;EVM0012126;EVM0013544;EVM0024546;EVM0008050;EVM0005782;EVM0015825;EVM0007331;EVM0005247;EVM0006117;EVM0013826;EVM0006758;EVM0001209;EVM0001154;EVM0010055;EVM0024147
GO:0071705	nitrogen compound transport	0.614	biological_process	EVM0004842;EVM0009836;EVM0008756;EVM0015409;EVM0005942;EVM0004238;EVM0023313;EVM0009612;EVM0005056;EVM0002019;EVM0016866;EVM0001735;EVM0012643;EVM0020708;EVM0011379;EVM0012251;EVM0011581;EVM0001510;EVM0006463;EVM0001186;EVM0022376;EVM0004343;EVM0012722;EVM0012726;EVM0008109;EVM0005230;EVM0001335;EVM0006895;EVM0020451;EVM0015240;EVM0023213;EVM0023184;EVM0010713;EVM0015079;EVM0002099;EVM0020243;EVM…
GO:0050502	cis-zeatin O-beta-D-glucosyltransferase activity	0.628	molecular_function	EVM0002664;EVM0013664;EVM0017168;EVM0013544;EVM0008050;EVM0013826;EVM0010055
GO:0050403	trans-zeatin O-beta-D-glucosyltransferase activity	0.628	molecular_function	EVM0002664;EVM0013664;EVM0017168;EVM0013544;EVM0008050;EVM0013826;EVM0010055
GO:0042752	regulation of circadian rhythm	0.642	biological_process	EVM0020059;EVM0002649;EVM0016434;EVM0013283;EVM0008322;EVM0002305;EVM0008776;EVM0023780
GO:0010286	heat acclimation	0.642	biological_process	EVM0004888;EVM0020582;EVM0023101;EVM0021817;EVM0014170;EVM0022622;EVM0009889;EVM0008175
GO:0051783	regulation of nuclear division	0.644	biological_process	EVM0001355;EVM0005842;EVM0001924;EVM0015304;EVM0004561;EVM0012271;EVM0015369;EVM0020088;EVM0017392;EVM0016389
GO:0031327	negative regulation of cellular biosynthetic process	0.656	biological_process	EVM0005842;EVM0012750;EVM0005110;EVM0001611;EVM0008005;EVM0005435;EVM0016685;EVM0012023;EVM0001124;EVM0010932;EVM0011340;EVM0020497;EVM0020033;EVM0004561;EVM0023138;EVM0005773;EVM0001672;EVM0017355;EVM0014427;EVM0014852;EVM0017661;EVM0009452;EVM0002308;EVM0001971;EVM0022257;EVM0008555;EVM0020301;EVM0023783
GO:0009892	negative regulation of metabolic process	0.66	biological_process	EVM0005842;EVM0012750;EVM0005110;EVM0001611;EVM0008005;EVM0005435;EVM0016685;EVM0006039;EVM0009646;EVM0012023;EVM0001124;EVM0015304;EVM0010932;EVM0013676;EVM0015155;EVM0009289;EVM0011340;EVM0004371;EVM0020497;EVM0020033;EVM0000456;EVM0004561;EVM0023138;EVM0005773;EVM0001672;EVM0014431;EVM0017355;EVM0014427;EVM0009661;EVM0014852;EVM0017392;EVM0017661;EVM0023740;EVM0016389;EVM0009452;EVM0000062;EVM…
GO:0009056	catabolic process	0.66	biological_process	EVM0017617;EVM0022440;EVM0005842;EVM0004103;EVM0008752;EVM0015409;EVM0013986;EVM0005280;EVM0020694;EVM0014696;EVM0004238;EVM0009612;EVM0002332;EVM0013874;EVM0009379;EVM0010278;EVM0022501;EVM0009600;EVM0007158;EVM0001120;EVM0015501;EVM0007026;EVM0015304;EVM0006730;EVM0001134;EVM0015155;EVM0008531;EVM0014150;EVM0009289;EVM0015936;EVM0024272;EVM0022861;EVM0006195;EVM0000456;EVM0004561;EVM0023734;EVM…
GO:0051128	regulation of cellular component organization	0.66	biological_process	EVM0001355;EVM0005842;EVM0001924;EVM0013856;EVM0015304;EVM0017547;EVM0004561;EVM0024392;EVM0023138;EVM0012271;EVM0015369;EVM0012925;EVM0020088;EVM0017392;EVM0017241;EVM0009516;EVM0010793;EVM0016389;EVM0023829;EVM0002308;EVM0001971;EVM0023783
GO:0006641	triglyceride metabolic process	0.664	biological_process	EVM0020210;EVM0013874;EVM0012075;EVM0000001;EVM0013976;EVM0017460
GO:0008378	galactosyltransferase activity	0.664	molecular_function	EVM0009967;EVM0012126;EVM0024546;EVM0015825;EVM0007331;EVM0024147
GO:0006639	acylglycerol metabolic process	0.664	biological_process	EVM0020210;EVM0013874;EVM0012075;EVM0000001;EVM0013976;EVM0017460
GO:0006638	neutral lipid metabolic process	0.664	biological_process	EVM0020210;EVM0013874;EVM0012075;EVM0000001;EVM0013976;EVM0017460
GO:0031981	nuclear lumen	0.666	cellular_component	EVM0021412;EVM0022691;EVM0005842;EVM0015577;EVM0020321;EVM0008756;EVM0012750;EVM0016501;EVM0013310;EVM0000250;EVM0006713;EVM0008005;EVM0023262;EVM0011254;EVM0013856;EVM0009977;EVM0009974;EVM0015226;EVM0024219;EVM0023101;EVM0005423;EVM0015304;EVM0015239;EVM0012523;EVM0002389;EVM0001717;EVM0015155;EVM0014795;EVM0000678;EVM0018633;EVM0014897;EVM0004561;EVM0006998;EVM0023138;EVM0017753;EVM0011581;EVM…
GO:0000398	mRNA splicing, via spliceosome	0.668	biological_process	EVM0005842;EVM0007158;EVM0004561;EVM0017753;EVM0005773;EVM0017392;EVM0009322;EVM0002305;EVM0017117
GO:0004176	ATP-dependent peptidase activity	0.71	molecular_function	EVM0009612;EVM0006859;EVM0012484;EVM0009443
GO:0003729	mRNA binding	0.758	molecular_function	EVM0005842;EVM0004561;EVM0002348;EVM0023585;EVM0011947;EVM0005025;EVM0016389;EVM0001971;EVM0022060;EVM0008778
GO:0003723	RNA binding	0.794	molecular_function	EVM0006011;EVM0005842;EVM0003474;EVM0014779;EVM0021627;EVM0004561;EVM0024392;EVM0016798;EVM0011776;EVM0002348;EVM0017355;EVM0017648;EVM0023585;EVM0011947;EVM0017392;EVM0015626;EVM0023740;EVM0005025;EVM0016389;EVM0016380;EVM0001971;EVM0022060;EVM0015510;EVM0008778
GO:0003724	RNA helicase activity	0.798	molecular_function	EVM0005842;EVM0007158;EVM0014150;EVM0009289;EVM0004561;EVM0011776;EVM0001971
GO:0035770	ribonucleoprotein granule	0.798	cellular_component	EVM0008374;EVM0009289;EVM0004026;EVM0011947;EVM0001971;EVM0008778;EVM0023783
GO:0036464	cytoplasmic ribonucleoprotein granule	0.798	cellular_component	EVM0008374;EVM0009289;EVM0004026;EVM0011947;EVM0001971;EVM0008778;EVM0023783
GO:0040020	regulation of meiotic nuclear division	0.798	biological_process	EVM0005842;EVM0001924;EVM0015304;EVM0004561;EVM0020088;EVM0017392;EVM0016389
GO:1901575	organic substance catabolic process	0.816	biological_process	EVM0017617;EVM0022440;EVM0005842;EVM0004103;EVM0008752;EVM0015409;EVM0013986;EVM0005280;EVM0020694;EVM0014696;EVM0004238;EVM0009612;EVM0002332;EVM0013874;EVM0009379;EVM0010278;EVM0022501;EVM0007158;EVM0015501;EVM0007026;EVM0015304;EVM0006730;EVM0001134;EVM0015155;EVM0008531;EVM0014150;EVM0009289;EVM0015936;EVM0024272;EVM0022861;EVM0006195;EVM0000456;EVM0004561;EVM0023734;EVM0006859;EVM0000332;EVM…
GO:0071944	cell periphery	0.818	cellular_component	EVM0005963;EVM0005263;EVM0005465;EVM0004842;EVM0019880;EVM0017073;EVM0022319;EVM0000237;EVM0003521;EVM0014746;EVM0014744;EVM0021795;EVM0022440;EVM0020663;EVM0006583;EVM0004729;EVM0004726;EVM0016081;EVM0022869;EVM0018481;EVM0005589;EVM0002915;EVM0013741;EVM0006011;EVM0013250;EVM0014248;EVM0009481;EVM0009550;EVM0018266;EVM0014022;EVM0010077;EVM0008688;EVM0023909;EVM0024125;EVM0020321;EVM0004103;EVM…
GO:0006796	phosphate-containing compound metabolic process	0.82	biological_process	EVM0013628;EVM0019880;EVM0022319;EVM0017617;EVM0002915;EVM0024230;EVM0005842;EVM0008752;EVM0015409;EVM0014882;EVM0018863;EVM0020694;EVM0021501;EVM0014696;EVM0009612;EVM0002332;EVM0020179;EVM0011944;EVM0010872;EVM0022501;EVM0013856;EVM0007158;EVM0016852;EVM0015501;EVM0000657;EVM0022220;EVM0015896;EVM0015304;EVM0023069;EVM0016532;EVM0013676;EVM0015155;EVM0008531;EVM0014150;EVM0009289;EVM0014795;EVM…
GO:0031974	membrane-enclosed lumen	0.824	cellular_component	EVM0021412;EVM0022691;EVM0005842;EVM0015577;EVM0020321;EVM0008756;EVM0012750;EVM0016501;EVM0013310;EVM0000250;EVM0003051;EVM0006713;EVM0009612;EVM0008005;EVM0023262;EVM0011944;EVM0010651;EVM0011254;EVM0013856;EVM0009977;EVM0009974;EVM0015226;EVM0024219;EVM0023101;EVM0005423;EVM0015304;EVM0015239;EVM0012523;EVM0002389;EVM0001717;EVM0015155;EVM0014795;EVM0000678;EVM0018633;EVM0014897;EVM0004561;EVM…
GO:0070013	intracellular organelle lumen	0.824	cellular_component	EVM0021412;EVM0022691;EVM0005842;EVM0015577;EVM0020321;EVM0008756;EVM0012750;EVM0016501;EVM0013310;EVM0000250;EVM0003051;EVM0006713;EVM0009612;EVM0008005;EVM0023262;EVM0011944;EVM0010651;EVM0011254;EVM0013856;EVM0009977;EVM0009974;EVM0015226;EVM0024219;EVM0023101;EVM0005423;EVM0015304;EVM0015239;EVM0012523;EVM0002389;EVM0001717;EVM0015155;EVM0014795;EVM0000678;EVM0018633;EVM0014897;EVM0004561;EVM…
GO:0043233	organelle lumen	0.824	cellular_component	EVM0021412;EVM0022691;EVM0005842;EVM0015577;EVM0020321;EVM0008756;EVM0012750;EVM0016501;EVM0013310;EVM0000250;EVM0003051;EVM0006713;EVM0009612;EVM0008005;EVM0023262;EVM0011944;EVM0010651;EVM0011254;EVM0013856;EVM0009977;EVM0009974;EVM0015226;EVM0024219;EVM0023101;EVM0005423;EVM0015304;EVM0015239;EVM0012523;EVM0002389;EVM0001717;EVM0015155;EVM0014795;EVM0000678;EVM0018633;EVM0014897;EVM0004561;EVM…
GO:0000375	RNA splicing, via transesterification reactions	0.83	biological_process	EVM0005842;EVM0007158;EVM0004561;EVM0017753;EVM0005773;EVM0017392;EVM0009322;EVM0002305;EVM0006109;EVM0017117
GO:0000377	RNA splicing, via transesterification reactions with bulged adenosine as nucleophile	0.83	biological_process	EVM0005842;EVM0007158;EVM0004561;EVM0017753;EVM0005773;EVM0017392;EVM0009322;EVM0002305;EVM0006109;EVM0017117
GO:0000813	ESCRT I complex	0.83	cellular_component	EVM0004005;EVM0011873;EVM0006437
GO:0034285	response to disaccharide	0.882	biological_process	EVM0020179;EVM0016685;EVM0020497;EVM0012075;EVM0018283;EVM0021706;EVM0014431;EVM0000062;EVM0002231
GO:2000243	positive regulation of reproductive process	0.882	biological_process	EVM0001924;EVM0005435;EVM0013782;EVM0014413;EVM0001888;EVM0008849;EVM0020059;EVM0001678;EVM0010842
GO:0009744	response to sucrose	0.882	biological_process	EVM0020179;EVM0016685;EVM0020497;EVM0012075;EVM0018283;EVM0021706;EVM0014431;EVM0000062;EVM0002231
GO:0009593	detection of chemical stimulus	0.884	biological_process	EVM0019880;EVM0009610;EVM0018063;EVM0023101;EVM0023356;EVM0020314
GO:0044237	cellular metabolic process	0.894	biological_process	EVM0013628;EVM0019880;EVM0022319;EVM0017617;EVM0014031;EVM0022440;EVM0024130;EVM0018481;EVM0005101;EVM0001355;EVM0002915;EVM0013030;EVM0006011;EVM0009550;EVM0024230;EVM0022691;EVM0006761;EVM0005842;EVM0020322;EVM0004103;EVM0008978;EVM0008756;EVM0008752;EVM0015409;EVM0020210;EVM0012750;EVM0014882;EVM0018863;EVM0015560;EVM0005280;EVM0013262;EVM0020694;EVM0019121;EVM0017833;EVM0021501;EVM0014696;EVM…
GO:0045934	negative regulation of nucleobase-containing compound metabolic process	0.894	biological_process	EVM0012750;EVM0005110;EVM0001611;EVM0008005;EVM0005435;EVM0016685;EVM0012023;EVM0001124;EVM0015304;EVM0010932;EVM0015155;EVM0011340;EVM0020033;EVM0023138;EVM0001672;EVM0017355;EVM0014427;EVM0017661;EVM0009452;EVM0002308;EVM0022257;EVM0008555;EVM0020301
GO:0008380	RNA splicing	0.912	biological_process	EVM0005842;EVM0007158;EVM0004561;EVM0017753;EVM0005773;EVM0016280;EVM0017392;EVM0002041;EVM0016434;EVM0009322;EVM0002305;EVM0006109;EVM0017117
GO:0016071	mRNA metabolic process	0.912	biological_process	EVM0005842;EVM0007158;EVM0015937;EVM0000456;EVM0004561;EVM0017753;EVM0005773;EVM0020836;EVM0013299;EVM0017648;EVM0017392;EVM0016389;EVM0016380;EVM0009322;EVM0002305;EVM0017117;EVM0023783
GO:0046463	acylglycerol biosynthetic process	0.912	biological_process	EVM0020210;EVM0012075;EVM0000001;EVM0013976;EVM0017460
GO:0046460	neutral lipid biosynthetic process	0.912	biological_process	EVM0020210;EVM0012075;EVM0000001;EVM0013976;EVM0017460
GO:0019432	triglyceride biosynthetic process	0.912	biological_process	EVM0020210;EVM0012075;EVM0000001;EVM0013976;EVM0017460
GO:0032268	regulation of cellular protein metabolic process	0.934	biological_process	EVM0013628;EVM0007165;EVM0018481;EVM0008374;EVM0005842;EVM0006039;EVM0013856;EVM0009646;EVM0016852;EVM0013676;EVM0020497;EVM0004561;EVM0023138;EVM0021122;EVM0005773;EVM0009661;EVM0014852;EVM0009516;EVM0023829;EVM0001971;EVM0008776;EVM0023031;EVM0023783
GO:0005215	transporter activity	0.934	molecular_function	EVM0004842;EVM0021899;EVM0009836;EVM0004729;EVM0008688;EVM0020321;EVM0008756;EVM0015409;EVM0002483;EVM0004238;EVM0005056;EVM0002019;EVM0016866;EVM0022501;EVM0020165;EVM0013460;EVM0021751;EVM0022157;EVM0024272;EVM0012643;EVM0006195;EVM0020708;EVM0011379;EVM0023734;EVM0012251;EVM0018284;EVM0011581;EVM0019154;EVM0008067;EVM0006463;EVM0001186;EVM0017746;EVM0004343;EVM0018387;EVM0007441;EVM0012722;EVM…
GO:0044712	single-organism catabolic process	0.934	biological_process	EVM0017617;EVM0005842;EVM0004103;EVM0008752;EVM0015409;EVM0013986;EVM0005280;EVM0020694;EVM0014696;EVM0004238;EVM0009612;EVM0002332;EVM0013874;EVM0009379;EVM0022501;EVM0009600;EVM0007158;EVM0001120;EVM0015501;EVM0007026;EVM0015304;EVM0006730;EVM0001134;EVM0015155;EVM0008531;EVM0014150;EVM0009289;EVM0024272;EVM0006195;EVM0004561;EVM0023734;EVM0006281;EVM0006859;EVM0000332;EVM0012484;EVM0019155;EVM…
GO:0006793	phosphorus metabolic process	0.954	biological_process	EVM0013628;EVM0019880;EVM0022319;EVM0017617;EVM0002915;EVM0024230;EVM0005842;EVM0008752;EVM0015409;EVM0014882;EVM0018863;EVM0020694;EVM0021501;EVM0014696;EVM0009612;EVM0002332;EVM0020179;EVM0011944;EVM0010872;EVM0022501;EVM0013856;EVM0007158;EVM0016852;EVM0015501;EVM0000657;EVM0022220;EVM0015896;EVM0015304;EVM0023069;EVM0016532;EVM0013676;EVM0015155;EVM0008531;EVM0014150;EVM0009289;EVM0014795;EVM…
GO:0006417	regulation of translation	0.956	biological_process	EVM0013628;EVM0007165;EVM0008374;EVM0005842;EVM0020497;EVM0004561;EVM0021122;EVM0005773;EVM0014852;EVM0009516;EVM0001971;EVM0023783
GO:0046434	organophosphate catabolic process	0.956	biological_process	EVM0005842;EVM0008752;EVM0015409;EVM0020694;EVM0014696;EVM0009612;EVM0002332;EVM0022501;EVM0007158;EVM0015501;EVM0015304;EVM0015155;EVM0014150;EVM0009289;EVM0006195;EVM0004561;EVM0023734;EVM0006859;EVM0000332;EVM0012484;EVM0020836;EVM0011776;EVM0012726;EVM0008102;EVM0009516;EVM0001971;EVM0021860;EVM0000683;EVM0009443;EVM0008555;EVM0008313
GO:0004722	protein serine/threonine phosphatase activity	0.962	molecular_function	EVM0019880;EVM0023069;EVM0017765;EVM0008414;EVM0008295;EVM0023292;EVM0009454
GO:0051445	regulation of meiotic cell cycle	0.962	biological_process	EVM0005842;EVM0001924;EVM0015304;EVM0004561;EVM0020088;EVM0017392;EVM0016389
GO:0019001	guanyl nucleotide binding	0.964	molecular_function	EVM0001355;EVM0010077;EVM0008756;EVM0014696;EVM0007767;EVM0002332;EVM0010273;EVM0015555;EVM0011581;EVM0008102;EVM0008555
GO:0005525	GTP binding	0.964	molecular_function	EVM0001355;EVM0010077;EVM0008756;EVM0014696;EVM0007767;EVM0002332;EVM0010273;EVM0015555;EVM0011581;EVM0008102;EVM0008555
GO:0032561	guanyl ribonucleotide binding	0.964	molecular_function	EVM0001355;EVM0010077;EVM0008756;EVM0014696;EVM0007767;EVM0002332;EVM0010273;EVM0015555;EVM0011581;EVM0008102;EVM0008555
GO:0036452	ESCRT complex	0.964	cellular_component	EVM0004005;EVM0002762;EVM0023184;EVM0011873;EVM0006437
GO:0005337	nucleoside transmembrane transporter activity	0.964	molecular_function	EVM0004238;EVM0011379;EVM0012251;EVM0006463;EVM0020243
GO:1905957	regulation of cellular response to alcohol	0.968	biological_process	EVM0023101;EVM0022220;EVM0008414;EVM0008295;EVM0004242;EVM0015396;EVM0014270;EVM0006216;EVM0021078
GO:0010029	regulation of seed germination	0.968	biological_process	EVM0010829;EVM0013639;EVM0020210;EVM0016685;EVM0024588;EVM0022220;EVM0022622;EVM0024507;EVM0005270
GO:0009787	regulation of abscisic acid-activated signaling pathway	0.968	biological_process	EVM0023101;EVM0022220;EVM0008414;EVM0008295;EVM0004242;EVM0015396;EVM0014270;EVM0006216;EVM0021078
GO:0034248	regulation of cellular amide metabolic process	0.968	biological_process	EVM0013628;EVM0007165;EVM0008374;EVM0005842;EVM0020497;EVM0004561;EVM0021122;EVM0005773;EVM0014852;EVM0009516;EVM0001971;EVM0023783
GO:0010629	negative regulation of gene expression	0.97	biological_process	EVM0005842;EVM0012750;EVM0005110;EVM0001611;EVM0008005;EVM0005435;EVM0016685;EVM0012023;EVM0001124;EVM0010932;EVM0009289;EVM0011340;EVM0020497;EVM0020033;EVM0000456;EVM0004561;EVM0023138;EVM0005773;EVM0001672;EVM0017355;EVM0014427;EVM0014852;EVM0017392;EVM0023740;EVM0016389;EVM0009452;EVM0002308;EVM0001971;EVM0022257;EVM0008555;EVM0020301;EVM0023783
GO:0048519	negative regulation of biological process	0.972	biological_process	EVM0022440;EVM0001355;EVM0008686;EVM0005842;EVM0012750;EVM0005110;EVM0001611;EVM0008005;EVM0020179;EVM0005435;EVM0016685;EVM0006039;EVM0009646;EVM0023101;EVM0012023;EVM0001124;EVM0015304;EVM0005636;EVM0020029;EVM0010932;EVM0013676;EVM0015155;EVM0009289;EVM0011340;EVM0004371;EVM0020497;EVM0020033;EVM0000456;EVM0004561;EVM0008414;EVM0023138;EVM0004109;EVM0021236;EVM0005773;EVM0001672;EVM0005203;EVM…
GO:0006342	chromatin silencing	0.972	biological_process	EVM0012750;EVM0008005;EVM0011340;EVM0023138;EVM0009452;EVM0020301
GO:0010564	regulation of cell cycle process	0.984	biological_process	EVM0001355;EVM0005842;EVM0001924;EVM0015304;EVM0001503;EVM0004561;EVM0012708;EVM0012271;EVM0015369;EVM0020088;EVM0017392;EVM0017661;EVM0016389;EVM0002308;EVM0001971
GO:0044763	single-organism cellular process	0.986	biological_process	EVM0021899;EVM0019880;EVM0022319;EVM0017617;EVM0010829;EVM0009836;EVM0014031;EVM0014744;EVM0009169;EVM0022440;EVM0015503;EVM0003985;EVM0004729;EVM0018481;EVM0005101;EVM0001355;EVM0013741;EVM0006011;EVM0001755;EVM0009550;EVM0024230;EVM0008688;EVM0006761;EVM0005842;EVM0020321;EVM0004103;EVM0008978;EVM0008756;EVM0008752;EVM0015409;EVM0020219;EVM0020210;EVM0012750;EVM0005280;EVM0002483;EVM0001611;EVM…
GO:1901419	regulation of response to alcohol	0.99	biological_process	EVM0023101;EVM0022220;EVM0008414;EVM0008295;EVM0004242;EVM0015396;EVM0014270;EVM0006216;EVM0021078
GO:1900140	regulation of seedling development	0.99	biological_process	EVM0010829;EVM0013639;EVM0020210;EVM0016685;EVM0024588;EVM0022220;EVM0022622;EVM0024507;EVM0005270
GO:0046777	protein autophosphorylation	0.99	biological_process	EVM0014882;EVM0018863;EVM0020179;EVM0000657;EVM0014353;EVM0021157;EVM0001888;EVM0008465;EVM0001678;EVM0012610;EVM0001440;EVM0000636;EVM0013415;EVM0017241;EVM0010793;EVM0006935;EVM0016732;EVM0021078
GO:0044428	nuclear part	0.99	cellular_component	EVM0021412;EVM0022691;EVM0005842;EVM0015577;EVM0020321;EVM0008756;EVM0012750;EVM0004888;EVM0016501;EVM0013310;EVM0000250;EVM0006713;EVM0008005;EVM0023262;EVM0011254;EVM0013856;EVM0009977;EVM0009974;EVM0015226;EVM0024219;EVM0023101;EVM0007158;EVM0005423;EVM0015304;EVM0015239;EVM0012523;EVM0002389;EVM0001717;EVM0015155;EVM0014795;EVM0000678;EVM0018633;EVM0004114;EVM0014897;EVM0004561;EVM0006998;EVM…
GO:0048580	regulation of post-embryonic development	0.99	biological_process	EVM0010829;EVM0013639;EVM0008686;EVM0020210;EVM0016697;EVM0020179;EVM0005435;EVM0016685;EVM0013782;EVM0024588;EVM0023101;EVM0012023;EVM0001124;EVM0022220;EVM0014413;EVM0001888;EVM0008849;EVM0020059;EVM0001672;EVM0001678;EVM0005203;EVM0011480;EVM0022622;EVM0017355;EVM0017407;EVM0024507;EVM0020314;EVM0002308;EVM0005270;EVM0010842
GO:0019787	ubiquitin-like protein transferase activity	0.99	molecular_function	EVM0013030;EVM0020322;EVM0023483;EVM0024588;EVM0023101;EVM0001636;EVM0001876;EVM0004637;EVM0007119;EVM0022376;EVM0012147;EVM0022139;EVM0015390;EVM0012449;EVM0014655;EVM0014729;EVM0024152;EVM0001021;EVM0006216
GO:0035639	purine ribonucleoside triphosphate binding	0.99	molecular_function	EVM0001355;EVM0010077;EVM0005842;EVM0008756;EVM0014696;EVM0007767;EVM0009612;EVM0002332;EVM0010273;EVM0013856;EVM0015555;EVM0024100;EVM0004561;EVM0024392;EVM0011581;EVM0008102;EVM0009889;EVM0007047;EVM0017241;EVM0009516;EVM0008555
GO:0010033	response to organic substance	0.99	biological_process	EVM0017617;EVM0010829;EVM0022440;EVM0003450;EVM0007165;EVM0018481;EVM0008686;EVM0005842;EVM0015751;EVM0003626;EVM0004103;EVM0020210;EVM0013790;EVM0017833;EVM0018325;EVM0003294;EVM0009612;EVM0008005;EVM0020179;EVM0005435;EVM0016685;EVM0018063;EVM0003043;EVM0003042;EVM0014771;EVM0002028;EVM0016858;EVM0005423;EVM0000723;EVM0001258;EVM0022220;EVM0023843;EVM0019212;EVM0014141;EVM0003671;EVM0023069;EVM…
GO:0007154	cell communication	0.99	biological_process	EVM0017617;EVM0010829;EVM0009169;EVM0018481;EVM0005842;EVM0001611;EVM0009610;EVM0008005;EVM0020179;EVM0003043;EVM0014779;EVM0015226;EVM0009600;EVM0023101;EVM0001120;EVM0013846;EVM0022220;EVM0023843;EVM0015304;EVM0023069;EVM0023117;EVM0005636;EVM0020029;EVM0017790;EVM0013676;EVM0012792;EVM0000456;EVM0014897;EVM0014413;EVM0004561;EVM0018368;EVM0006281;EVM0015916;EVM0015269;EVM0019155;EVM0017962;EVM…
GO:0009815	1-aminocyclopropane-1-carboxylate oxidase activity	0.99	molecular_function	EVM0005730;EVM0000298;EVM0010934
GO:0071398	cellular response to fatty acid	0.99	biological_process	EVM0014771;EVM0000298;EVM0010934
GO:0051240	positive regulation of multicellular organismal process	0.994	biological_process	EVM0020210;EVM0005435;EVM0016685;EVM0013782;EVM0014413;EVM0001888;EVM0008849;EVM0020059;EVM0001678;EVM0024507;EVM0010842
GO:0017076	purine nucleotide binding	0.994	molecular_function	EVM0001355;EVM0010077;EVM0005842;EVM0008756;EVM0014696;EVM0007767;EVM0009612;EVM0002332;EVM0010273;EVM0013856;EVM0015555;EVM0024100;EVM0004561;EVM0024392;EVM0011581;EVM0008102;EVM0009889;EVM0007047;EVM0017241;EVM0009516;EVM0008555
GO:0001883	purine nucleoside binding	0.994	molecular_function	EVM0001355;EVM0010077;EVM0005842;EVM0008756;EVM0014696;EVM0007767;EVM0009612;EVM0002332;EVM0010273;EVM0013856;EVM0015555;EVM0024100;EVM0004561;EVM0024392;EVM0011581;EVM0008102;EVM0009889;EVM0007047;EVM0017241;EVM0009516;EVM0008555
GO:0001882	nucleoside binding	0.994	molecular_function	EVM0001355;EVM0010077;EVM0005842;EVM0008756;EVM0014696;EVM0007767;EVM0009612;EVM0002332;EVM0010273;EVM0013856;EVM0015555;EVM0024100;EVM0004561;EVM0024392;EVM0011581;EVM0008102;EVM0009889;EVM0007047;EVM0017241;EVM0009516;EVM0008555
GO:0032549	ribonucleoside binding	0.994	molecular_function	EVM0001355;EVM0010077;EVM0005842;EVM0008756;EVM0014696;EVM0007767;EVM0009612;EVM0002332;EVM0010273;EVM0013856;EVM0015555;EVM0024100;EVM0004561;EVM0024392;EVM0011581;EVM0008102;EVM0009889;EVM0007047;EVM0017241;EVM0009516;EVM0008555
GO:0032555	purine ribonucleotide binding	0.994	molecular_function	EVM0001355;EVM0010077;EVM0005842;EVM0008756;EVM0014696;EVM0007767;EVM0009612;EVM0002332;EVM0010273;EVM0013856;EVM0015555;EVM0024100;EVM0004561;EVM0024392;EVM0011581;EVM0008102;EVM0009889;EVM0007047;EVM0017241;EVM0009516;EVM0008555
GO:0032550	purine ribonucleoside binding	0.994	molecular_function	EVM0001355;EVM0010077;EVM0005842;EVM0008756;EVM0014696;EVM0007767;EVM0009612;EVM0002332;EVM0010273;EVM0013856;EVM0015555;EVM0024100;EVM0004561;EVM0024392;EVM0011581;EVM0008102;EVM0009889;EVM0007047;EVM0017241;EVM0009516;EVM0008555
GO:0044270	cellular nitrogen compound catabolic process	0.994	biological_process	EVM0005842;EVM0008752;EVM0015409;EVM0020694;EVM0014696;EVM0009612;EVM0002332;EVM0009379;EVM0022501;EVM0007158;EVM0015501;EVM0015304;EVM0001134;EVM0015155;EVM0014150;EVM0009289;EVM0015936;EVM0006195;EVM0000456;EVM0004561;EVM0023734;EVM0006859;EVM0000332;EVM0012484;EVM0020836;EVM0011776;EVM0012726;EVM0008102;EVM0017392;EVM0009516;EVM0016389;EVM0011467;EVM0001971;EVM0009443;EVM0008555;EVM0008313;EVM…
GO:0045814	negative regulation of gene expression, epigenetic	0.994	biological_process	EVM0012750;EVM0008005;EVM0011340;EVM0023138;EVM0009452;EVM0020301
GO:0005681	spliceosomal complex	0.996	cellular_component	EVM0005842;EVM0007158;EVM0004561;EVM0017392;EVM0009322
GO:0051726	regulation of cell cycle	0.996	biological_process	EVM0001355;EVM0005842;EVM0008756;EVM0001924;EVM0020694;EVM0009974;EVM0015304;EVM0001503;EVM0004561;EVM0011581;EVM0012708;EVM0012588;EVM0012271;EVM0015369;EVM0020088;EVM0017392;EVM0017661;EVM0017417;EVM0016389;EVM0002308;EVM0001971
GO:0048518	positive regulation of biological process	0.996	biological_process	EVM0013628;EVM0015503;EVM0005842;EVM0020210;EVM0002907;EVM0001924;EVM0005435;EVM0016685;EVM0013782;EVM0003043;EVM0014779;EVM0013856;EVM0009977;EVM0015226;EVM0013846;EVM0022220;EVM0020029;EVM0007233;EVM0017790;EVM0003065;EVM0012792;EVM0017304;EVM0014897;EVM0014413;EVM0014170;EVM0004561;EVM0001888;EVM0008849;EVM0020059;EVM0001678;EVM0020836;EVM0001693;EVM0012708;EVM0000626;EVM0004242;EVM0007680;EVM…
GO:0033043	regulation of organelle organization	0.996	biological_process	EVM0001355;EVM0005842;EVM0001924;EVM0013856;EVM0015304;EVM0004561;EVM0023138;EVM0012271;EVM0015369;EVM0012925;EVM0020088;EVM0017392;EVM0009516;EVM0016389;EVM0023783
GO:0010118	stomatal movement	0.996	biological_process	EVM0017617;EVM0015409;EVM0009603;EVM0008414;EVM0002770;EVM0012726;EVM0013976;EVM0017241
GO:0003677	DNA binding	0.996	molecular_function	EVM0003985;EVM0018861;EVM0018464;EVM0002907;EVM0001611;EVM0016697;EVM0017833;EVM0017833;EVM0009612;EVM0005435;EVM0015304;EVM0015304;EVM0005636;EVM0015155;EVM0015155;EVM0012792;EVM0005155;EVM0020033;EVM0005716;EVM0017160;EVM0014413;EVM0018368;EVM0024392;EVM0024392;EVM0012075;EVM0011811;EVM0001672;EVM0021495;EVM0023400;EVM0009410;EVM0000626;EVM0017355;EVM0017355;EVM0014427;EVM0002087;EVM0016909;EVM…
GO:0036094	small molecule binding	0.996	molecular_function	EVM0001355;EVM0010077;EVM0005842;EVM0008756;EVM0014696;EVM0007767;EVM0009612;EVM0002332;EVM0010273;EVM0013856;EVM0015555;EVM0024100;EVM0009600;EVM0001120;EVM0004561;EVM0024392;EVM0006281;EVM0011581;EVM0019155;EVM0003829;EVM0011811;EVM0019713;EVM0008102;EVM0020757;EVM0009889;EVM0006895;EVM0007047;EVM0001547;EVM0017241;EVM0009516;EVM0009160;EVM0003075;EVM0008555
GO:0051246	regulation of protein metabolic process	0.996	biological_process	EVM0013628;EVM0007165;EVM0018481;EVM0008374;EVM0005842;EVM0006039;EVM0013856;EVM0009646;EVM0016852;EVM0013676;EVM0020497;EVM0004561;EVM0023138;EVM0021122;EVM0005773;EVM0009661;EVM0014852;EVM0009516;EVM0023829;EVM0001971;EVM0008776;EVM0023031;EVM0023783
GO:0009143	nucleoside triphosphate catabolic process	0.996	biological_process	EVM0005842;EVM0008752;EVM0015409;EVM0020694;EVM0014696;EVM0009612;EVM0002332;EVM0022501;EVM0007158;EVM0015501;EVM0015304;EVM0015155;EVM0014150;EVM0009289;EVM0006195;EVM0004561;EVM0023734;EVM0006859;EVM0000332;EVM0012484;EVM0020836;EVM0011776;EVM0012726;EVM0008102;EVM0009516;EVM0001971;EVM0009443;EVM0008555;EVM0008313
GO:0009146	purine nucleoside triphosphate catabolic process	0.996	biological_process	EVM0005842;EVM0008752;EVM0015409;EVM0020694;EVM0014696;EVM0009612;EVM0002332;EVM0022501;EVM0007158;EVM0015501;EVM0015304;EVM0015155;EVM0014150;EVM0009289;EVM0006195;EVM0004561;EVM0023734;EVM0006859;EVM0000332;EVM0012484;EVM0020836;EVM0011776;EVM0012726;EVM0008102;EVM0009516;EVM0001971;EVM0009443;EVM0008555;EVM0008313
GO:0009261	ribonucleotide catabolic process	0.996	biological_process	EVM0005842;EVM0008752;EVM0015409;EVM0020694;EVM0014696;EVM0009612;EVM0002332;EVM0022501;EVM0007158;EVM0015501;EVM0015304;EVM0015155;EVM0014150;EVM0009289;EVM0006195;EVM0004561;EVM0023734;EVM0006859;EVM0000332;EVM0012484;EVM0020836;EVM0011776;EVM0012726;EVM0008102;EVM0009516;EVM0001971;EVM0009443;EVM0008555;EVM0008313
GO:0009207	purine ribonucleoside triphosphate catabolic process	0.996	biological_process	EVM0005842;EVM0008752;EVM0015409;EVM0020694;EVM0014696;EVM0009612;EVM0002332;EVM0022501;EVM0007158;EVM0015501;EVM0015304;EVM0015155;EVM0014150;EVM0009289;EVM0006195;EVM0004561;EVM0023734;EVM0006859;EVM0000332;EVM0012484;EVM0020836;EVM0011776;EVM0012726;EVM0008102;EVM0009516;EVM0001971;EVM0009443;EVM0008555;EVM0008313
GO:0009203	ribonucleoside triphosphate catabolic process	0.996	biological_process	EVM0005842;EVM0008752;EVM0015409;EVM0020694;EVM0014696;EVM0009612;EVM0002332;EVM0022501;EVM0007158;EVM0015501;EVM0015304;EVM0015155;EVM0014150;EVM0009289;EVM0006195;EVM0004561;EVM0023734;EVM0006859;EVM0000332;EVM0012484;EVM0020836;EVM0011776;EVM0012726;EVM0008102;EVM0009516;EVM0001971;EVM0009443;EVM0008555;EVM0008313
GO:0009166	nucleotide catabolic process	0.996	biological_process	EVM0005842;EVM0008752;EVM0015409;EVM0020694;EVM0014696;EVM0009612;EVM0002332;EVM0022501;EVM0007158;EVM0015501;EVM0015304;EVM0015155;EVM0014150;EVM0009289;EVM0006195;EVM0004561;EVM0023734;EVM0006859;EVM0000332;EVM0012484;EVM0020836;EVM0011776;EVM0012726;EVM0008102;EVM0009516;EVM0001971;EVM0009443;EVM0008555;EVM0008313
GO:1901292	nucleoside phosphate catabolic process	0.996	biological_process	EVM0005842;EVM0008752;EVM0015409;EVM0020694;EVM0014696;EVM0009612;EVM0002332;EVM0022501;EVM0007158;EVM0015501;EVM0015304;EVM0015155;EVM0014150;EVM0009289;EVM0006195;EVM0004561;EVM0023734;EVM0006859;EVM0000332;EVM0012484;EVM0020836;EVM0011776;EVM0012726;EVM0008102;EVM0009516;EVM0001971;EVM0009443;EVM0008555;EVM0008313
GO:0009154	purine ribonucleotide catabolic process	0.996	biological_process	EVM0005842;EVM0008752;EVM0015409;EVM0020694;EVM0014696;EVM0009612;EVM0002332;EVM0022501;EVM0007158;EVM0015501;EVM0015304;EVM0015155;EVM0014150;EVM0009289;EVM0006195;EVM0004561;EVM0023734;EVM0006859;EVM0000332;EVM0012484;EVM0020836;EVM0011776;EVM0012726;EVM0008102;EVM0009516;EVM0001971;EVM0009443;EVM0008555;EVM0008313
GO:0006195	purine nucleotide catabolic process	0.996	biological_process	EVM0005842;EVM0008752;EVM0015409;EVM0020694;EVM0014696;EVM0009612;EVM0002332;EVM0022501;EVM0007158;EVM0015501;EVM0015304;EVM0015155;EVM0014150;EVM0009289;EVM0006195;EVM0004561;EVM0023734;EVM0006859;EVM0000332;EVM0012484;EVM0020836;EVM0011776;EVM0012726;EVM0008102;EVM0009516;EVM0001971;EVM0009443;EVM0008555;EVM0008313
GO:0009738	abscisic acid-activated signaling pathway	0.996	biological_process	EVM0010829;EVM0022220;EVM0023069;EVM0023117;EVM0014897;EVM0018368;EVM0008295;EVM0023400;EVM0013976;EVM0009160;EVM0012387;EVM0006216
GO:0019439	aromatic compound catabolic process	0.996	biological_process	EVM0005842;EVM0008752;EVM0015409;EVM0020694;EVM0014696;EVM0009612;EVM0002332;EVM0009379;EVM0022501;EVM0007158;EVM0015501;EVM0015304;EVM0001134;EVM0015155;EVM0014150;EVM0009289;EVM0015936;EVM0006195;EVM0000456;EVM0004561;EVM0023734;EVM0006859;EVM0000332;EVM0012484;EVM0020836;EVM0011776;EVM0012726;EVM0008102;EVM0017392;EVM0009516;EVM0016389;EVM0001971;EVM0009443;EVM0008555;EVM0008313;EVM0023783
GO:0097367	carbohydrate derivative binding	0.996	molecular_function	EVM0001355;EVM0010077;EVM0005842;EVM0008756;EVM0014696;EVM0007767;EVM0009612;EVM0002332;EVM0010273;EVM0013856;EVM0015555;EVM0024100;EVM0004561;EVM0024392;EVM0011581;EVM0008102;EVM0009889;EVM0007047;EVM0017241;EVM0020882;EVM0009516;EVM0008555
GO:0008152	metabolic process	0.996	biological_process	EVM0021896;EVM0013628;EVM0019880;EVM0022319;EVM0017617;EVM0000237;EVM0014031;EVM0022440;EVM0024130;EVM0002102;EVM0007360;EVM0018481;EVM0005101;EVM0005586;EVM0001355;EVM0002915;EVM0013030;EVM0013741;EVM0006011;EVM0013639;EVM0009550;EVM0024230;EVM0022691;EVM0006761;EVM0005842;EVM0020322;EVM0004103;EVM0008978;EVM0008756;EVM0008752;EVM0015409;EVM0002664;EVM0020210;EVM0012750;EVM0014882;EVM0018863;EVM…
GO:0004842	ubiquitin-protein transferase activity	0.996	molecular_function	EVM0013030;EVM0020322;EVM0023483;EVM0024588;EVM0001636;EVM0001876;EVM0004637;EVM0007119;EVM0022376;EVM0012147;EVM0022139;EVM0015390;EVM0012449;EVM0014655;EVM0014729;EVM0024152;EVM0001021;EVM0006216
GO:0009746	response to hexose	0.996	biological_process	EVM0017617;EVM0020210;EVM0020179;EVM0021706;EVM0015396;EVM0004833;EVM0002231
GO:0080046	quercetin 4'-O-glucosyltransferase activity	0.996	molecular_function	EVM0002664;EVM0013664;EVM0017168;EVM0013544;EVM0008050;EVM0013826;EVM0010055
GO:0016773	phosphotransferase activity, alcohol group as acceptor	0.996	molecular_function	EVM0013628;EVM0017617;EVM0002915;EVM0014882;EVM0018863;EVM0021501;EVM0020179;EVM0010872;EVM0013856;EVM0000657;EVM0022220;EVM0014353;EVM0021157;EVM0001888;EVM0021708;EVM0008465;EVM0003134;EVM0007200;EVM0001678;EVM0010428;EVM0012610;EVM0002349;EVM0016978;EVM0001449;EVM0001440;EVM0011941;EVM0000636;EVM0013976;EVM0021023;EVM0020088;EVM0013415;EVM0017241;EVM0010793;EVM0006935;EVM0021316;EVM0006216;EVM…
GO:0034655	nucleobase-containing compound catabolic process	0.996	biological_process	EVM0005842;EVM0008752;EVM0015409;EVM0020694;EVM0014696;EVM0009612;EVM0002332;EVM0022501;EVM0007158;EVM0015501;EVM0015304;EVM0015155;EVM0014150;EVM0009289;EVM0015936;EVM0006195;EVM0000456;EVM0004561;EVM0023734;EVM0006859;EVM0000332;EVM0012484;EVM0020836;EVM0011776;EVM0012726;EVM0008102;EVM0017392;EVM0009516;EVM0016389;EVM0001971;EVM0009443;EVM0008555;EVM0008313;EVM0023783
GO:0006598	polyamine catabolic process	0.996	biological_process	EVM0003360;EVM0013157
GO:0042402	cellular biogenic amine catabolic process	0.996	biological_process	EVM0003360;EVM0013157
GO:0051447	negative regulation of meiotic cell cycle	0.996	biological_process	EVM0015304;EVM0016389
GO:0071545	inositol phosphate catabolic process	0.996	biological_process	EVM0021860;EVM0000683
GO:0045835	negative regulation of meiotic nuclear division	0.996	biological_process	EVM0015304;EVM0016389
GO:0006982	response to lipid hydroperoxide	0.996	biological_process	EVM0015201;EVM0009691
GO:0000291	nuclear-transcribed mRNA catabolic process, exonucleolytic	0.996	biological_process	EVM0000456;EVM0017392
GO:0046855	inositol phosphate dephosphorylation	0.996	biological_process	EVM0021860;EVM0000683
GO:0046592	polyamine oxidase activity	0.996	molecular_function	EVM0003360;EVM0013157
GO:0046838	phosphorylated carbohydrate dephosphorylation	0.996	biological_process	EVM0021860;EVM0000683
GO:0009310	amine catabolic process	0.996	biological_process	EVM0003360;EVM0013157
GO:0010335	response to non-ionic osmotic stress	0.996	biological_process	EVM0015201;EVM0009691
GO:0033194	response to hydroperoxide	0.996	biological_process	EVM0015201;EVM0009691
GO:0004534	5'-3' exoribonuclease activity	0.996	molecular_function	EVM0015936;EVM0000456
GO:0090630	activation of GTPase activity	0.996	biological_process	EVM0007516;EVM0007516
GO:0008409	5'-3' exonuclease activity	0.996	molecular_function	EVM0015936;EVM0000456
GO:0048439	flower morphogenesis	0.996	biological_process	EVM0017790;EVM0020033
GO:0018149	peptide cross-linking	0.996	biological_process	EVM0014431;EVM0000062
GO:0018316	peptide cross-linking via L-cystine	0.996	biological_process	EVM0014431;EVM0000062
GO:0016757	transferase activity, transferring glycosyl groups	1	molecular_function	EVM0021896;EVM0007360;EVM0013741;EVM0002664;EVM0009967;EVM0016510;EVM0016858;EVM0013664;EVM0002533;EVM0017168;EVM0021706;EVM0005207;EVM0001693;EVM0012876;EVM0012126;EVM0013544;EVM0024546;EVM0008050;EVM0005782;EVM0014448;EVM0015825;EVM0007331;EVM0005247;EVM0006117;EVM0013826;EVM0006758;EVM0001209;EVM0001154;EVM0010055;EVM0024147
GO:0015858	nucleoside transport	1	biological_process	EVM0004238;EVM0011379;EVM0012251;EVM0006463;EVM0020243
GO:0045727	positive regulation of translation	1	biological_process	EVM0013628;EVM0005842;EVM0004561;EVM0009516;EVM0001971
GO:0008138	protein tyrosine/serine/threonine phosphatase activity	1	molecular_function	EVM0013676;EVM0008531;EVM0020836;EVM0009661;EVM0000683
GO:0045892	negative regulation of transcription, DNA-templated	1	biological_process	EVM0012750;EVM0005110;EVM0001611;EVM0008005;EVM0005435;EVM0016685;EVM0012023;EVM0001124;EVM0010932;EVM0011340;EVM0020033;EVM0023138;EVM0001672;EVM0017355;EVM0014427;EVM0009452;EVM0002308;EVM0022257;EVM0008555;EVM0020301
GO:1903507	negative regulation of nucleic acid-templated transcription	1	biological_process	EVM0012750;EVM0005110;EVM0001611;EVM0008005;EVM0005435;EVM0016685;EVM0012023;EVM0001124;EVM0010932;EVM0011340;EVM0020033;EVM0023138;EVM0001672;EVM0017355;EVM0014427;EVM0009452;EVM0002308;EVM0022257;EVM0008555;EVM0020301
GO:1902679	negative regulation of RNA biosynthetic process	1	biological_process	EVM0012750;EVM0005110;EVM0001611;EVM0008005;EVM0005435;EVM0016685;EVM0012023;EVM0001124;EVM0010932;EVM0011340;EVM0020033;EVM0023138;EVM0001672;EVM0017355;EVM0014427;EVM0009452;EVM0002308;EVM0022257;EVM0008555;EVM0020301
GO:0051253	negative regulation of RNA metabolic process	1	biological_process	EVM0012750;EVM0005110;EVM0001611;EVM0008005;EVM0005435;EVM0016685;EVM0012023;EVM0001124;EVM0010932;EVM0011340;EVM0020033;EVM0023138;EVM0001672;EVM0017355;EVM0014427;EVM0009452;EVM0002308;EVM0022257;EVM0008555;EVM0020301
GO:0043565	sequence-specific DNA binding	1	molecular_function	EVM0018464;EVM0002907;EVM0017833;EVM0009612;EVM0005435;EVM0005636;EVM0020033;EVM0005716;EVM0014413;EVM0011811;EVM0009410;EVM0016909;EVM0017525;EVM0002308;EVM0003075
GO:0051094	positive regulation of developmental process	1	biological_process	EVM0020210;EVM0005435;EVM0016685;EVM0013782;EVM0014413;EVM0001888;EVM0008849;EVM0020059;EVM0001678;EVM0024507;EVM0010842
GO:0015932	nucleobase-containing compound transmembrane transporter activity	1	molecular_function	EVM0009836;EVM0004238;EVM0011379;EVM0012251;EVM0006463;EVM0001186;EVM0004343;EVM0010713;EVM0000309;EVM0020243
GO:0009057	macromolecule catabolic process	1	biological_process	EVM0022440;EVM0005842;EVM0004103;EVM0009612;EVM0010278;EVM0001134;EVM0008531;EVM0015936;EVM0022861;EVM0000456;EVM0004561;EVM0007119;EVM0001078;EVM0010286;EVM0022376;EVM0016608;EVM0009661;EVM0017392;EVM0016389;EVM0014655;EVM0024152;EVM0001209;EVM0001021;EVM0023783
GO:0010628	positive regulation of gene expression	1	biological_process	EVM0013628;EVM0015503;EVM0005842;EVM0002907;EVM0003043;EVM0009977;EVM0020029;EVM0003065;EVM0012792;EVM0017304;EVM0014897;EVM0014413;EVM0014170;EVM0004561;EVM0004242;EVM0007680;EVM0002087;EVM0015392;EVM0009516;EVM0017525;EVM0016434;EVM0009217;EVM0012387;EVM0001971
GO:0098805	whole membrane	1	cellular_component	EVM0016893;EVM0005263;EVM0019507;EVM0017617;EVM0007633;EVM0020663;EVM0014022;EVM0015970;EVM0008752;EVM0015409;EVM0020109;EVM0004238;EVM0020747;EVM0007767;EVM0009610;EVM0001735;EVM0004143;EVM0010273;EVM0015177;EVM0022501;EVM0024456;EVM0009600;EVM0001120;EVM0007026;EVM0020769;EVM0021751;EVM0019212;EVM0017958;EVM0011750;EVM0004746;EVM0008674;EVM0011801;EVM0005167;EVM0006281;EVM0020825;EVM0000332;EVM…
GO:0005982	starch metabolic process	1	biological_process	EVM0005101;EVM0016858;EVM0008531;EVM0021706;EVM0001078;EVM0009661;EVM0001209;EVM0001154
GO:0016597	amino acid binding	1	molecular_function	EVM0009600;EVM0001120;EVM0006281;EVM0019155;EVM0019713;EVM0020757;EVM0006895;EVM0001547
GO:0032553	ribonucleotide binding	1	molecular_function	EVM0001355;EVM0010077;EVM0005842;EVM0008756;EVM0014696;EVM0007767;EVM0009612;EVM0002332;EVM0010273;EVM0013856;EVM0015555;EVM0024100;EVM0004561;EVM0024392;EVM0011581;EVM0008102;EVM0009889;EVM0007047;EVM0017241;EVM0009516;EVM0008555
GO:0009911	positive regulation of flower development	1	biological_process	EVM0005435;EVM0013782;EVM0001888;EVM0008849;EVM0001678;EVM0010842
GO:0052689	carboxylic ester hydrolase activity	1	molecular_function	EVM0001615;EVM0001615;EVM0004158;EVM0004158;EVM0009813;EVM0013874;EVM0009379;EVM0012655;EVM0012655;EVM0007586;EVM0007586;EVM0022917;EVM0022917
GO:0010557	positive regulation of macromolecule biosynthetic process	1	biological_process	EVM0013628;EVM0015503;EVM0005842;EVM0002907;EVM0003043;EVM0009977;EVM0020029;EVM0003065;EVM0012792;EVM0017304;EVM0014897;EVM0014413;EVM0014170;EVM0004561;EVM0004242;EVM0007680;EVM0002087;EVM0015392;EVM0009516;EVM0017525;EVM0016434;EVM0009217;EVM0012387;EVM0001971
GO:0044765	single-organism transport	1	biological_process	EVM0004842;EVM0021899;EVM0017617;EVM0009836;EVM0004729;EVM0008688;EVM0020321;EVM0008756;EVM0015409;EVM0002483;EVM0005942;EVM0004238;EVM0006713;EVM0023313;EVM0007767;EVM0009612;EVM0005056;EVM0002019;EVM0016866;EVM0001735;EVM0022501;EVM0021751;EVM0005636;EVM0022157;EVM0024272;EVM0012643;EVM0006195;EVM0020708;EVM0011379;EVM0023734;EVM0012251;EVM0005761;EVM0001463;EVM0004109;EVM0018284;EVM0011581;EVM…
GO:1902578	single-organism localization	1	biological_process	EVM0004842;EVM0021899;EVM0017617;EVM0009836;EVM0004729;EVM0008688;EVM0020321;EVM0008756;EVM0015409;EVM0002483;EVM0005942;EVM0004238;EVM0006713;EVM0023313;EVM0007767;EVM0009612;EVM0005056;EVM0002019;EVM0016866;EVM0001735;EVM0022501;EVM0021751;EVM0005636;EVM0022157;EVM0024272;EVM0012643;EVM0006195;EVM0020708;EVM0011379;EVM0023734;EVM0012251;EVM0005761;EVM0001463;EVM0004109;EVM0018284;EVM0011581;EVM…
GO:0009266	response to temperature stimulus	1	biological_process	EVM0013628;EVM0022440;EVM0003450;EVM0013741;EVM0020210;EVM0001611;EVM0004888;EVM0013310;EVM0003294;EVM0020582;EVM0023101;EVM0017033;EVM0017142;EVM0014141;EVM0023117;EVM0020029;EVM0011904;EVM0001421;EVM0021817;EVM0000296;EVM0014170;EVM0024392;EVM0021632;EVM0017753;EVM0002770;EVM0020059;EVM0005773;EVM0001078;EVM0010429;EVM0014431;EVM0000038;EVM0008295;EVM0022622;EVM0011763;EVM0009889;EVM0014427;EVM…
GO:0046130	purine ribonucleoside catabolic process	1	biological_process	EVM0005842;EVM0008752;EVM0015409;EVM0020694;EVM0014696;EVM0009612;EVM0002332;EVM0022501;EVM0007158;EVM0015501;EVM0015304;EVM0015155;EVM0014150;EVM0009289;EVM0006195;EVM0004561;EVM0023734;EVM0006859;EVM0000332;EVM0012484;EVM0020836;EVM0011776;EVM0012726;EVM0008102;EVM0009516;EVM0001971;EVM0009443;EVM0008555;EVM0008313
GO:0005985	sucrose metabolic process	1	biological_process	EVM0016858;EVM0006730;EVM0015916;EVM0013976
GO:1901642	nucleoside transmembrane transport	1	biological_process	EVM0004238;EVM0012251;EVM0006463;EVM0020243
GO:0035250	UDP-galactosyltransferase activity	1	molecular_function	EVM0012126;EVM0024546;EVM0015825;EVM0007331
GO:0015860	purine nucleoside transmembrane transport	1	biological_process	EVM0004238;EVM0012251;EVM0006463;EVM0020243
GO:0015211	purine nucleoside transmembrane transporter activity	1	molecular_function	EVM0004238;EVM0012251;EVM0006463;EVM0020243
GO:0010608	posttranscriptional regulation of gene expression	1	biological_process	EVM0013628;EVM0007165;EVM0008374;EVM0005842;EVM0008005;EVM0009289;EVM0020497;EVM0004561;EVM0023138;EVM0021122;EVM0005773;EVM0014852;EVM0010497;EVM0009516;EVM0009452;EVM0001971;EVM0023783
GO:0008272	sulfate transport	1	biological_process	EVM0005636;EVM0010169;EVM0016909
GO:0044248	cellular catabolic process	1	biological_process	EVM0022440;EVM0005842;EVM0004103;EVM0008752;EVM0015409;EVM0005280;EVM0020694;EVM0014696;EVM0004238;EVM0009612;EVM0002332;EVM0013874;EVM0009379;EVM0022501;EVM0009600;EVM0007158;EVM0001120;EVM0015501;EVM0007026;EVM0015304;EVM0006730;EVM0001134;EVM0015155;EVM0008531;EVM0014150;EVM0009289;EVM0015936;EVM0024272;EVM0006195;EVM0000456;EVM0004561;EVM0023734;EVM0006281;EVM0006859;EVM0000332;EVM0012484;EVM…
GO:0006152	purine nucleoside catabolic process	1	biological_process	EVM0005842;EVM0008752;EVM0015409;EVM0020694;EVM0014696;EVM0009612;EVM0002332;EVM0022501;EVM0007158;EVM0015501;EVM0015304;EVM0015155;EVM0014150;EVM0009289;EVM0006195;EVM0004561;EVM0023734;EVM0006859;EVM0000332;EVM0012484;EVM0020836;EVM0011776;EVM0012726;EVM0008102;EVM0009516;EVM0001971;EVM0009443;EVM0008555;EVM0008313
GO:0046467	membrane lipid biosynthetic process	1	biological_process	EVM0007717;EVM0008895;EVM0012126;EVM0024546;EVM0006758
GO:0034250	positive regulation of cellular amide metabolic process	1	biological_process	EVM0013628;EVM0005842;EVM0004561;EVM0009516;EVM0001971
GO:0009164	nucleoside catabolic process	1	biological_process	EVM0005842;EVM0008752;EVM0015409;EVM0020694;EVM0014696;EVM0009612;EVM0002332;EVM0022501;EVM0007158;EVM0015501;EVM0015304;EVM0015155;EVM0014150;EVM0009289;EVM0006195;EVM0004561;EVM0023734;EVM0006859;EVM0000332;EVM0012484;EVM0020836;EVM0011776;EVM0012726;EVM0008102;EVM0009516;EVM0001971;EVM0009443;EVM0008555;EVM0008313
GO:0042454	ribonucleoside catabolic process	1	biological_process	EVM0005842;EVM0008752;EVM0015409;EVM0020694;EVM0014696;EVM0009612;EVM0002332;EVM0022501;EVM0007158;EVM0015501;EVM0015304;EVM0015155;EVM0014150;EVM0009289;EVM0006195;EVM0004561;EVM0023734;EVM0006859;EVM0000332;EVM0012484;EVM0020836;EVM0011776;EVM0012726;EVM0008102;EVM0009516;EVM0001971;EVM0009443;EVM0008555;EVM0008313
GO:0046700	heterocycle catabolic process	1	biological_process	EVM0005842;EVM0008752;EVM0015409;EVM0020694;EVM0014696;EVM0009612;EVM0002332;EVM0009379;EVM0022501;EVM0007158;EVM0015501;EVM0015304;EVM0001134;EVM0015155;EVM0014150;EVM0009289;EVM0015936;EVM0006195;EVM0000456;EVM0004561;EVM0023734;EVM0006859;EVM0000332;EVM0012484;EVM0020836;EVM0011776;EVM0012726;EVM0008102;EVM0017392;EVM0009516;EVM0016389;EVM0001971;EVM0009443;EVM0008555;EVM0008313;EVM0023783
GO:0006396	RNA processing	1	biological_process	EVM0005842;EVM0008005;EVM0000265;EVM0007158;EVM0021627;EVM0000678;EVM0004561;EVM0006998;EVM0023138;EVM0017753;EVM0005773;EVM0010428;EVM0020836;EVM0011776;EVM0013299;EVM0017648;EVM0016280;EVM0017392;EVM0002041;EVM0019994;EVM0016434;EVM0016380;EVM0009322;EVM0002305;EVM0006109;EVM0017117;EVM0015510
GO:0072523	purine-containing compound catabolic process	1	biological_process	EVM0005842;EVM0008752;EVM0015409;EVM0020694;EVM0014696;EVM0009612;EVM0002332;EVM0022501;EVM0007158;EVM0015501;EVM0015304;EVM0015155;EVM0014150;EVM0009289;EVM0006195;EVM0004561;EVM0023734;EVM0006859;EVM0000332;EVM0012484;EVM0020836;EVM0011776;EVM0012726;EVM0008102;EVM0009516;EVM0001971;EVM0009443;EVM0008555;EVM0008313
GO:0051606	detection of stimulus	1	biological_process	EVM0019880;EVM0018481;EVM0009610;EVM0018063;EVM0023101;EVM0007200;EVM0017241;EVM0023356;EVM0020314
GO:2000241	regulation of reproductive process	1	biological_process	EVM0008686;EVM0005842;EVM0016697;EVM0001924;EVM0005435;EVM0016685;EVM0013782;EVM0023101;EVM0015304;EVM0017547;EVM0014413;EVM0004561;EVM0001888;EVM0008849;EVM0020059;EVM0001672;EVM0001678;EVM0005203;EVM0011480;EVM0017355;EVM0020088;EVM0017407;EVM0017392;EVM0016389;EVM0010842
GO:0034284	response to monosaccharide	1	biological_process	EVM0017617;EVM0020210;EVM0020179;EVM0021706;EVM0015396;EVM0004833;EVM0002231
GO:0048573	photoperiodism, flowering	1	biological_process	EVM0001888;EVM0001672;EVM0001678;EVM0011941;EVM0022797;EVM0008322;EVM0008776
GO:1901361	organic cyclic compound catabolic process	1	biological_process	EVM0005842;EVM0008752;EVM0015409;EVM0020694;EVM0014696;EVM0009612;EVM0002332;EVM0009379;EVM0022501;EVM0007158;EVM0015501;EVM0015304;EVM0001134;EVM0015155;EVM0014150;EVM0009289;EVM0015936;EVM0006195;EVM0000456;EVM0004561;EVM0023734;EVM0006859;EVM0000332;EVM0012484;EVM0020836;EVM0011776;EVM0012726;EVM0008102;EVM0017392;EVM0009516;EVM0016389;EVM0001971;EVM0009443;EVM0008555;EVM0008313;EVM0023783
GO:0010193	response to ozone	1	biological_process	EVM0014882;EVM0020497;EVM0005209;EVM0002348;EVM0012858;EVM0020642
GO:0008194	UDP-glycosyltransferase activity	1	molecular_function	EVM0021896;EVM0007360;EVM0002664;EVM0016510;EVM0016858;EVM0013664;EVM0002533;EVM0017168;EVM0005207;EVM0001693;EVM0012126;EVM0013544;EVM0024546;EVM0008050;EVM0015825;EVM0007331;EVM0005247;EVM0006117;EVM0013826;EVM0001154;EVM0010055
GO:0009409	response to cold	1	biological_process	EVM0013628;EVM0003450;EVM0013741;EVM0020210;EVM0013310;EVM0003294;EVM0023101;EVM0017033;EVM0017142;EVM0014141;EVM0023117;EVM0011904;EVM0001421;EVM0000296;EVM0024392;EVM0021632;EVM0017753;EVM0002770;EVM0020059;EVM0005773;EVM0001078;EVM0010429;EVM0014431;EVM0000038;EVM0008295;EVM0022622;EVM0011763;EVM0014427;EVM0002087;EVM0020088;EVM0019836;EVM0017407;EVM0024160;EVM0011371;EVM0000062;EVM0015700
GO:0005975	carbohydrate metabolic process	1	biological_process	EVM0017617;EVM0014031;EVM0005101;EVM0008978;EVM0020210;EVM0013986;EVM0009813;EVM0016858;EVM0006730;EVM0007233;EVM0008531;EVM0021706;EVM0015916;EVM0001078;EVM0001693;EVM0014431;EVM0012876;EVM0008109;EVM0016608;EVM0009661;EVM0013976;EVM0014448;EVM0015825;EVM0004833;EVM0007331;EVM0000062;EVM0020408;EVM0001209;EVM0011635;EVM0001154;EVM0021860;EVM0000683
GO:0006820	anion transport	1	biological_process	EVM0021899;EVM0015409;EVM0004238;EVM0005056;EVM0002019;EVM0005636;EVM0024272;EVM0012643;EVM0020708;EVM0012251;EVM0008067;EVM0004343;EVM0018387;EVM0012726;EVM0010169;EVM0020451;EVM0023213;EVM0016909;EVM0015079;EVM0021201;EVM0002099;EVM0006111;EVM0004279
GO:1901505	carbohydrate derivative transporter activity	1	molecular_function	EVM0021899;EVM0004238;EVM0011379;EVM0012251;EVM0006463;EVM0004343;EVM0018387;EVM0000309;EVM0020243
GO:0051641	cellular localization	1	biological_process	EVM0005842;EVM0008756;EVM0005942;EVM0006713;EVM0023313;EVM0007767;EVM0009612;EVM0001735;EVM0005636;EVM0004561;EVM0023138;EVM0011581;EVM0001510;EVM0000332;EVM0015916;EVM0007200;EVM0000858;EVM0022376;EVM0008109;EVM0008102;EVM0023087;EVM0005230;EVM0006895;EVM0016909;EVM0006134;EVM0012925;EVM0002813;EVM0014442;EVM0020503;EVM0009516;EVM0008896;EVM0011635;EVM0001021;EVM0000224;EVM0008313
GO:0032269	negative regulation of cellular protein metabolic process	1	biological_process	EVM0005842;EVM0006039;EVM0009646;EVM0013676;EVM0020497;EVM0004561;EVM0005773;EVM0009661;EVM0014852;EVM0023829;EVM0001971;EVM0023783
GO:0051170	nuclear import	1	biological_process	EVM0008756;EVM0005636;EVM0011581;EVM0016909;EVM0002813;EVM0008896
GO:1902644	tertiary alcohol metabolic process	1	biological_process	EVM0002028;EVM0003666;EVM0012101;EVM0019606
GO:0009687	abscisic acid metabolic process	1	biological_process	EVM0002028;EVM0003666;EVM0012101;EVM0019606
GO:0003779	actin binding	1	molecular_function	EVM0013846;EVM0022622;EVM0023773;EVM0021257
GO:0043288	apocarotenoid metabolic process	1	biological_process	EVM0002028;EVM0003666;EVM0012101;EVM0019606
GO:0042623	ATPase activity, coupled	1	molecular_function	EVM0005842;EVM0015409;EVM0009612;EVM0022501;EVM0007158;EVM0015304;EVM0015155;EVM0014150;EVM0009289;EVM0006195;EVM0004561;EVM0023734;EVM0006859;EVM0012484;EVM0020836;EVM0011776;EVM0012726;EVM0001971;EVM0009443;EVM0008313
GO:0050793	regulation of developmental process	1	biological_process	EVM0010829;EVM0022440;EVM0013639;EVM0008686;EVM0020210;EVM0016697;EVM0024062;EVM0020179;EVM0005435;EVM0016685;EVM0013782;EVM0024588;EVM0023101;EVM0012023;EVM0001124;EVM0022220;EVM0005636;EVM0020033;EVM0017547;EVM0017160;EVM0014413;EVM0001503;EVM0001888;EVM0004109;EVM0008849;EVM0021236;EVM0020059;EVM0001672;EVM0001678;EVM0005203;EVM0011480;EVM0022622;EVM0009410;EVM0017355;EVM0006895;EVM0016909;EVM…
GO:0071214	cellular response to abiotic stimulus	1	biological_process	EVM0009169;EVM0018481;EVM0001611;EVM0009600;EVM0001120;EVM0020497;EVM0001421;EVM0006281;EVM0021706;EVM0019155;EVM0010429;EVM0020757;EVM0000626;EVM0012871;EVM0001547;EVM0017241;EVM0002308;EVM0001971;EVM0023031;EVM0012081
GO:0015711	organic anion transport	1	biological_process	EVM0021899;EVM0015409;EVM0004238;EVM0005056;EVM0002019;EVM0024272;EVM0012643;EVM0012251;EVM0008067;EVM0004343;EVM0018387;EVM0012726;EVM0020451;EVM0015079;EVM0002099
GO:0035251	UDP-glucosyltransferase activity	1	molecular_function	EVM0007360;EVM0002664;EVM0016510;EVM0016858;EVM0013664;EVM0002533;EVM0017168;EVM0005207;EVM0001693;EVM0013544;EVM0008050;EVM0005247;EVM0013826;EVM0001154;EVM0010055
GO:0044700	single organism signaling	1	biological_process	EVM0017617;EVM0010829;EVM0018481;EVM0005842;EVM0001611;EVM0009610;EVM0008005;EVM0020179;EVM0003043;EVM0014779;EVM0015226;EVM0013846;EVM0022220;EVM0023843;EVM0015304;EVM0023069;EVM0023117;EVM0020029;EVM0017790;EVM0013676;EVM0012792;EVM0000456;EVM0014897;EVM0004561;EVM0018368;EVM0015269;EVM0003829;EVM0007200;EVM0001693;EVM0012708;EVM0002349;EVM0008295;EVM0023400;EVM0020197;EVM0000626;EVM0001449;EVM…
GO:0010224	response to UV-B	1	biological_process	EVM0002664;EVM0013664;EVM0015304;EVM0015201;EVM0020497;EVM0017168;EVM0008849;EVM0013544;EVM0009691;EVM0008050;EVM0013826;EVM0010055
GO:0023052	signaling	1	biological_process	EVM0017617;EVM0010829;EVM0018481;EVM0005842;EVM0001611;EVM0009610;EVM0008005;EVM0020179;EVM0003043;EVM0014779;EVM0015226;EVM0013846;EVM0022220;EVM0023843;EVM0015304;EVM0023069;EVM0023117;EVM0020029;EVM0017790;EVM0013676;EVM0012792;EVM0000456;EVM0014897;EVM0004561;EVM0018368;EVM0015269;EVM0003829;EVM0007200;EVM0001693;EVM0012708;EVM0002349;EVM0008295;EVM0023400;EVM0020197;EVM0000626;EVM0001449;EVM…
GO:0009416	response to light stimulus	1	biological_process	EVM0018481;EVM0016409;EVM0002664;EVM0018861;EVM0001611;EVM0020693;EVM0018063;EVM0015501;EVM0017033;EVM0013664;EVM0015304;EVM0023595;EVM0015155;EVM0015201;EVM0007717;EVM0003065;EVM0011904;EVM0020497;EVM0005155;EVM0017168;EVM0012101;EVM0001888;EVM0021706;EVM0008849;EVM0020059;EVM0001672;EVM0001678;EVM0014431;EVM0015693;EVM0008102;EVM0000626;EVM0013544;EVM0009889;EVM0012871;EVM0011941;EVM0020852;EVM…
GO:0016301	kinase activity	1	molecular_function	EVM0013628;EVM0017617;EVM0002915;EVM0014882;EVM0018863;EVM0021501;EVM0020179;EVM0010872;EVM0013856;EVM0000657;EVM0022220;EVM0015896;EVM0016532;EVM0014795;EVM0014353;EVM0021157;EVM0001888;EVM0021708;EVM0008465;EVM0003134;EVM0007200;EVM0001678;EVM0010428;EVM0012610;EVM0002349;EVM0016978;EVM0001449;EVM0001440;EVM0011941;EVM0000636;EVM0013976;EVM0021023;EVM0020088;EVM0013415;EVM0017241;EVM0010793;EVM…
GO:0043086	negative regulation of catalytic activity	1	biological_process	EVM0006039;EVM0021184;EVM0009646;EVM0013676;EVM0004371;EVM0009661;EVM0023829;EVM0001971
GO:0030148	sphingolipid biosynthetic process	1	biological_process	EVM0007717;EVM0008895;EVM0006758
GO:0045495	pole plasm	1	cellular_component	EVM0005842;EVM0009289;EVM0004561
GO:0042593	glucose homeostasis	1	biological_process	EVM0017617;EVM0021706;EVM0024507
GO:0005513	detection of calcium ion	1	biological_process	EVM0019880;EVM0009610;EVM0020314
GO:0042254	ribosome biogenesis	1	biological_process	EVM0014696;EVM0002332;EVM0000265;EVM0021627;EVM0000678;EVM0006998;EVM0010428;EVM0011776;EVM0017648;EVM0017392;EVM0001971;EVM0008555;EVM0015510
GO:0009749	response to glucose	1	biological_process	EVM0017617;EVM0020210;EVM0021706;EVM0015396;EVM0004833;EVM0002231
GO:0034249	negative regulation of cellular amide metabolic process	1	biological_process	EVM0005842;EVM0020497;EVM0004561;EVM0005773;EVM0014852;EVM0001971;EVM0023783
GO:0004386	helicase activity	1	molecular_function	EVM0005842;EVM0007158;EVM0014150;EVM0009289;EVM0004561;EVM0011776;EVM0001971
GO:0017148	negative regulation of translation	1	biological_process	EVM0005842;EVM0020497;EVM0004561;EVM0005773;EVM0014852;EVM0001971;EVM0023783
GO:0051784	negative regulation of nuclear division	1	biological_process	EVM0001355;EVM0015304;EVM0012271;EVM0016389
GO:0009789	positive regulation of abscisic acid-activated signaling pathway	1	biological_process	EVM0022220;EVM0004242;EVM0014270;EVM0021078
GO:1905959	positive regulation of cellular response to alcohol	1	biological_process	EVM0022220;EVM0004242;EVM0014270;EVM0021078
GO:0051983	regulation of chromosome segregation	1	biological_process	EVM0001355;EVM0023138;EVM0012271;EVM0015369
GO:0016881	acid-amino acid ligase activity	1	molecular_function	EVM0013030;EVM0020322;EVM0023483;EVM0024588;EVM0023101;EVM0001636;EVM0001876;EVM0004637;EVM0007119;EVM0022376;EVM0012147;EVM0022139;EVM0015390;EVM0012449;EVM0014655;EVM0014729;EVM0024152;EVM0001021;EVM0006216
GO:0043168	anion binding	1	molecular_function	EVM0001355;EVM0010077;EVM0005842;EVM0008756;EVM0014696;EVM0007767;EVM0009612;EVM0002332;EVM0010273;EVM0013856;EVM0015555;EVM0024100;EVM0009600;EVM0001120;EVM0004561;EVM0024392;EVM0006281;EVM0011581;EVM0019155;EVM0003829;EVM0019713;EVM0008102;EVM0020757;EVM0009889;EVM0006895;EVM0007047;EVM0001547;EVM0017241;EVM0009516;EVM0007064;EVM0009160;EVM0008555
GO:0022892	substrate-specific transporter activity	1	molecular_function	EVM0004842;EVM0021899;EVM0009836;EVM0004729;EVM0008688;EVM0020321;EVM0008756;EVM0002483;EVM0004238;EVM0005056;EVM0002019;EVM0016866;EVM0021751;EVM0022157;EVM0024272;EVM0006195;EVM0020708;EVM0011379;EVM0023734;EVM0012251;EVM0011581;EVM0019154;EVM0008067;EVM0006463;EVM0001186;EVM0004343;EVM0018387;EVM0012722;EVM0021486;EVM0010169;EVM0001335;EVM0000551;EVM0020451;EVM0015240;EVM0016127;EVM0010713;EVM…
GO:0007623	circadian rhythm	1	biological_process	EVM0013639;EVM0001611;EVM0015501;EVM0021236;EVM0020059;EVM0005203;EVM0006895;EVM0017241;EVM0022797;EVM0008776;EVM0023780
GO:0048511	rhythmic process	1	biological_process	EVM0013639;EVM0001611;EVM0015501;EVM0021236;EVM0020059;EVM0005203;EVM0006895;EVM0017241;EVM0022797;EVM0008776;EVM0023780
GO:0006073	cellular glucan metabolic process	1	biological_process	EVM0005101;EVM0008978;EVM0016858;EVM0008531;EVM0021706;EVM0001078;EVM0016608;EVM0009661;EVM0004833;EVM0001209;EVM0001154
GO:0044042	glucan metabolic process	1	biological_process	EVM0005101;EVM0008978;EVM0016858;EVM0008531;EVM0021706;EVM0001078;EVM0016608;EVM0009661;EVM0004833;EVM0001209;EVM0001154
GO:0004364	glutathione transferase activity	1	molecular_function	EVM0009600;EVM0001120;EVM0006281;EVM0019155;EVM0020757;EVM0001547
GO:0071396	cellular response to lipid	1	biological_process	EVM0010829;EVM0018481;EVM0014771;EVM0022220;EVM0023069;EVM0023117;EVM0014897;EVM0000298;EVM0018368;EVM0015269;EVM0008295;EVM0023400;EVM0000626;EVM0023986;EVM0004242;EVM0013976;EVM0010793;EVM0009160;EVM0010934;EVM0012387;EVM0006216
GO:2000030	regulation of response to red or far red light	1	biological_process	EVM0009600;EVM0012023;EVM0001120;EVM0001124;EVM0006281;EVM0019155;EVM0020757;EVM0001547;EVM0020314
GO:1901615	organic hydroxy compound metabolic process	1	biological_process	EVM0002664;EVM0002028;EVM0013664;EVM0003702;EVM0003666;EVM0015201;EVM0017168;EVM0012101;EVM0021122;EVM0008849;EVM0015693;EVM0013544;EVM0000001;EVM0006895;EVM0019606;EVM0009691;EVM0008050;EVM0017661;EVM0013826;EVM0017460;EVM0021860;EVM0000683;EVM0010055
GO:1901565	organonitrogen compound catabolic process	1	biological_process	EVM0005842;EVM0008752;EVM0015409;EVM0020694;EVM0014696;EVM0009612;EVM0002332;EVM0009379;EVM0022501;EVM0007158;EVM0015501;EVM0007026;EVM0015304;EVM0001134;EVM0015155;EVM0014150;EVM0009289;EVM0006195;EVM0004561;EVM0023734;EVM0006859;EVM0000332;EVM0012484;EVM0001075;EVM0020836;EVM0011776;EVM0012726;EVM0003360;EVM0008102;EVM0013157;EVM0009516;EVM0001971;EVM0009443;EVM0008555;EVM0008313
GO:1901677	phosphate transmembrane transporter activity	1	molecular_function	EVM0009836;EVM0004238;EVM0012251;EVM0018284;EVM0004343;EVM0006111;EVM0004279
GO:0005719	nuclear euchromatin	1	cellular_component	EVM0012523;EVM0019994
GO:0071108	protein K48-linked deubiquitination	1	biological_process	EVM0023185;EVM0012925
GO:0047216	inositol 3-alpha-galactosyltransferase activity	1	molecular_function	EVM0015825;EVM0007331
GO:0071454	cellular response to anoxia	1	biological_process	EVM0014431;EVM0000062
GO:0061135	endopeptidase regulator activity	1	molecular_function	EVM0006039;EVM0009646
GO:0061134	peptidase regulator activity	1	molecular_function	EVM0006039;EVM0009646
GO:0010587	miRNA catabolic process	1	biological_process	EVM0015936;EVM0000456
GO:0005782	peroxisomal matrix	1	cellular_component	EVM0009612;EVM0010235
GO:0030414	peptidase inhibitor activity	1	molecular_function	EVM0006039;EVM0009646
GO:0070536	protein K63-linked deubiquitination	1	biological_process	EVM0023185;EVM0012925
GO:0004866	endopeptidase inhibitor activity	1	molecular_function	EVM0006039;EVM0009646
GO:0004869	cysteine-type endopeptidase inhibitor activity	1	molecular_function	EVM0006039;EVM0009646
GO:0010110	regulation of photosynthesis, dark reaction	1	biological_process	EVM0014431;EVM0000062
GO:0080152	regulation of reductive pentose-phosphate cycle	1	biological_process	EVM0014431;EVM0000062
GO:0080153	negative regulation of reductive pentose-phosphate cycle	1	biological_process	EVM0014431;EVM0000062
GO:0042273	ribosomal large subunit biogenesis	1	biological_process	EVM0021627;EVM0011776
GO:0031907	microbody lumen	1	cellular_component	EVM0009612;EVM0010235
GO:0005956	protein kinase CK2 complex	1	cellular_component	EVM0016852;EVM0008776
GO:0016151	nickel cation binding	1	molecular_function	EVM0014431;EVM0000062
GO:0097193	intrinsic apoptotic signaling pathway	1	biological_process	EVM0015304;EVM0001971
GO:0006083	acetate metabolic process	1	biological_process	EVM0014031;EVM0024272
GO:0042991	transcription factor import into nucleus	1	biological_process	EVM0002813;EVM0008896
GO:0016772	transferase activity, transferring phosphorus-containing groups	1	molecular_function	EVM0013628;EVM0017617;EVM0005101;EVM0002915;EVM0024230;EVM0014882;EVM0018863;EVM0021501;EVM0020179;EVM0010872;EVM0013856;EVM0000657;EVM0022220;EVM0015896;EVM0007233;EVM0016532;EVM0014795;EVM0014353;EVM0021157;EVM0001888;EVM0021708;EVM0008465;EVM0003134;EVM0007200;EVM0001678;EVM0010428;EVM0020836;EVM0012610;EVM0002349;EVM0001841;EVM0016978;EVM0001449;EVM0001440;EVM0024238;EVM0011941;EVM0000636;EVM…
GO:0009144	purine nucleoside triphosphate metabolic process	1	biological_process	EVM0005842;EVM0008752;EVM0015409;EVM0020694;EVM0014696;EVM0009612;EVM0002332;EVM0011944;EVM0022501;EVM0007158;EVM0015501;EVM0015304;EVM0015155;EVM0014150;EVM0009289;EVM0006195;EVM0004561;EVM0023734;EVM0006859;EVM0000332;EVM0012484;EVM0020836;EVM0011776;EVM0012726;EVM0008102;EVM0009516;EVM0001971;EVM0009443;EVM0008555;EVM0008313
GO:0009205	purine ribonucleoside triphosphate metabolic process	1	biological_process	EVM0005842;EVM0008752;EVM0015409;EVM0020694;EVM0014696;EVM0009612;EVM0002332;EVM0011944;EVM0022501;EVM0007158;EVM0015501;EVM0015304;EVM0015155;EVM0014150;EVM0009289;EVM0006195;EVM0004561;EVM0023734;EVM0006859;EVM0000332;EVM0012484;EVM0020836;EVM0011776;EVM0012726;EVM0008102;EVM0009516;EVM0001971;EVM0009443;EVM0008555;EVM0008313
GO:0046128	purine ribonucleoside metabolic process	1	biological_process	EVM0005842;EVM0008752;EVM0015409;EVM0020694;EVM0014696;EVM0009612;EVM0002332;EVM0011944;EVM0022501;EVM0007158;EVM0015501;EVM0015304;EVM0015155;EVM0014150;EVM0009289;EVM0006195;EVM0004561;EVM0023734;EVM0006859;EVM0000332;EVM0012484;EVM0020836;EVM0011776;EVM0012726;EVM0008102;EVM0009516;EVM0001971;EVM0009443;EVM0008555;EVM0008313
GO:0009199	ribonucleoside triphosphate metabolic process	1	biological_process	EVM0005842;EVM0008752;EVM0015409;EVM0020694;EVM0014696;EVM0009612;EVM0002332;EVM0011944;EVM0022501;EVM0007158;EVM0015501;EVM0015304;EVM0015155;EVM0014150;EVM0009289;EVM0006195;EVM0004561;EVM0023734;EVM0006859;EVM0000332;EVM0012484;EVM0020836;EVM0011776;EVM0012726;EVM0008102;EVM0009516;EVM0001971;EVM0009443;EVM0008555;EVM0008313
GO:0051248	negative regulation of protein metabolic process	1	biological_process	EVM0005842;EVM0006039;EVM0009646;EVM0013676;EVM0020497;EVM0004561;EVM0005773;EVM0009661;EVM0014852;EVM0023829;EVM0001971;EVM0023783
GO:0071229	cellular response to acid chemical	1	biological_process	EVM0010829;EVM0009169;EVM0003043;EVM0014771;EVM0009600;EVM0001120;EVM0022220;EVM0023069;EVM0023117;EVM0020029;EVM0017790;EVM0020497;EVM0014897;EVM0000298;EVM0018368;EVM0006281;EVM0019155;EVM0010429;EVM0008295;EVM0023400;EVM0020757;EVM0000626;EVM0004242;EVM0013976;EVM0001547;EVM0009160;EVM0013283;EVM0010934;EVM0002308;EVM0012387;EVM0006216
GO:0016604	nuclear body	1	cellular_component	EVM0005842;EVM0023101;EVM0004561;EVM0017753;EVM0005773;EVM0012708;EVM0016389;EVM0009322;EVM0001971
GO:0031328	positive regulation of cellular biosynthetic process	1	biological_process	EVM0013628;EVM0015503;EVM0005842;EVM0002907;EVM0003043;EVM0009977;EVM0020029;EVM0003065;EVM0012792;EVM0017304;EVM0014897;EVM0014413;EVM0014170;EVM0004561;EVM0004242;EVM0007680;EVM0002087;EVM0015392;EVM0009516;EVM0017525;EVM0016434;EVM0009217;EVM0012387;EVM0001971
GO:0042538	hyperosmotic salinity response	1	biological_process	EVM0003450;EVM0003294;EVM0003666;EVM0015201;EVM0009691;EVM0021449;EVM0011371;EVM0009217
GO:0051181	cofactor transport	1	biological_process	EVM0015409;EVM0012643;EVM0012251;EVM0012726
GO:1901421	positive regulation of response to alcohol	1	biological_process	EVM0022220;EVM0004242;EVM0014270;EVM0021078
GO:1902645	tertiary alcohol biosynthetic process	1	biological_process	EVM0003666;EVM0012101;EVM0019606
GO:0051180	vitamin transport	1	biological_process	EVM0015409;EVM0012643;EVM0012726
GO:0051183	vitamin transporter activity	1	molecular_function	EVM0015409;EVM0012643;EVM0012726
GO:0070542	response to fatty acid	1	biological_process	EVM0014771;EVM0000298;EVM0010934
GO:0043547	positive regulation of GTPase activity	1	biological_process	EVM0007516;EVM0007516;EVM0007516
GO:0010466	negative regulation of peptidase activity	1	biological_process	EVM0006039;EVM0009646;EVM0001971
GO:0010190	cytochrome b6f complex assembly	1	biological_process	EVM0023022;EVM0004342;EVM0002162
GO:0009688	abscisic acid biosynthetic process	1	biological_process	EVM0003666;EVM0012101;EVM0019606
GO:0052547	regulation of peptidase activity	1	biological_process	EVM0006039;EVM0009646;EVM0001971
GO:0052548	regulation of endopeptidase activity	1	biological_process	EVM0006039;EVM0009646;EVM0001971
GO:0043087	regulation of GTPase activity	1	biological_process	EVM0007516;EVM0007516;EVM0007516
GO:0010951	negative regulation of endopeptidase activity	1	biological_process	EVM0006039;EVM0009646;EVM0001971
GO:0010494	cytoplasmic stress granule	1	cellular_component	EVM0011947;EVM0001971;EVM0008778
GO:0043289	apocarotenoid biosynthetic process	1	biological_process	EVM0003666;EVM0012101;EVM0019606
GO:1901617	organic hydroxy compound biosynthetic process	1	biological_process	EVM0002664;EVM0013664;EVM0003702;EVM0003666;EVM0015201;EVM0017168;EVM0012101;EVM0021122;EVM0008849;EVM0015693;EVM0013544;EVM0006895;EVM0019606;EVM0009691;EVM0008050;EVM0017661;EVM0013826;EVM0010055
GO:0003727	single-stranded RNA binding	1	molecular_function	EVM0005842;EVM0004561;EVM0002348;EVM0011947;EVM0001971;EVM0022060;EVM0008778
GO:0030054	cell junction	1	cellular_component	EVM0002102;EVM0020663;EVM0006583;EVM0005586;EVM0008752;EVM0015409;EVM0014882;EVM0018863;EVM0013986;EVM0004888;EVM0016866;EVM0002801;EVM0001739;EVM0010278;EVM0010273;EVM0006818;EVM0019339;EVM0021184;EVM0006706;EVM0024219;EVM0019937;EVM0013209;EVM0020769;EVM0014786;EVM0005966;EVM0002659;EVM0022157;EVM0002754;EVM0006195;EVM0016838;EVM0011750;EVM0013523;EVM0011746;EVM0015269;EVM0008064;EVM0002518;EVM…
GO:1901658	glycosyl compound catabolic process	1	biological_process	EVM0005842;EVM0008752;EVM0015409;EVM0020694;EVM0014696;EVM0009612;EVM0002332;EVM0022501;EVM0007158;EVM0015501;EVM0015304;EVM0015155;EVM0014150;EVM0009289;EVM0006195;EVM0004561;EVM0023734;EVM0006859;EVM0000332;EVM0012484;EVM0020836;EVM0011776;EVM0012726;EVM0008102;EVM0009516;EVM0001971;EVM0009443;EVM0008555;EVM0008313
GO:0016310	phosphorylation	1	biological_process	EVM0013628;EVM0017617;EVM0002915;EVM0014882;EVM0018863;EVM0021501;EVM0020179;EVM0010872;EVM0013856;EVM0016852;EVM0000657;EVM0022220;EVM0015896;EVM0016532;EVM0014795;EVM0014353;EVM0021157;EVM0001888;EVM0021708;EVM0008465;EVM0003134;EVM0007200;EVM0001678;EVM0010428;EVM0012610;EVM0002349;EVM0016978;EVM0001449;EVM0001440;EVM0011941;EVM0000636;EVM0013976;EVM0021023;EVM0020088;EVM0013415;EVM0017241;EVM…
GO:0017111	nucleoside-triphosphatase activity	1	molecular_function	EVM0005842;EVM0008752;EVM0015409;EVM0020694;EVM0014696;EVM0009612;EVM0002332;EVM0022501;EVM0007158;EVM0015501;EVM0015304;EVM0015155;EVM0014150;EVM0009289;EVM0006195;EVM0004561;EVM0023734;EVM0006859;EVM0000332;EVM0012484;EVM0020836;EVM0011776;EVM0012726;EVM0008102;EVM0009516;EVM0001971;EVM0009443;EVM0008555;EVM0008313
GO:0022857	transmembrane transporter activity	1	molecular_function	EVM0021899;EVM0009836;EVM0004729;EVM0008688;EVM0020321;EVM0015409;EVM0002483;EVM0004238;EVM0005056;EVM0002019;EVM0022501;EVM0021751;EVM0022157;EVM0024272;EVM0006195;EVM0020708;EVM0011379;EVM0023734;EVM0012251;EVM0018284;EVM0019154;EVM0008067;EVM0006463;EVM0001186;EVM0004343;EVM0018387;EVM0012722;EVM0012726;EVM0021486;EVM0010169;EVM0001335;EVM0000551;EVM0020451;EVM0016127;EVM0010713;EVM0021733;EVM…
GO:0045893	positive regulation of transcription, DNA-templated	1	biological_process	EVM0015503;EVM0002907;EVM0003043;EVM0009977;EVM0020029;EVM0003065;EVM0012792;EVM0017304;EVM0014897;EVM0014413;EVM0014170;EVM0004242;EVM0007680;EVM0002087;EVM0015392;EVM0017525;EVM0016434;EVM0009217;EVM0012387;EVM0001971
GO:1903508	positive regulation of nucleic acid-templated transcription	1	biological_process	EVM0015503;EVM0002907;EVM0003043;EVM0009977;EVM0020029;EVM0003065;EVM0012792;EVM0017304;EVM0014897;EVM0014413;EVM0014170;EVM0004242;EVM0007680;EVM0002087;EVM0015392;EVM0017525;EVM0016434;EVM0009217;EVM0012387;EVM0001971
GO:1901136	carbohydrate derivative catabolic process	1	biological_process	EVM0005842;EVM0008752;EVM0015409;EVM0020694;EVM0014696;EVM0009612;EVM0002332;EVM0022501;EVM0007158;EVM0015501;EVM0015304;EVM0015155;EVM0014150;EVM0009289;EVM0006195;EVM0004561;EVM0023734;EVM0006859;EVM0000332;EVM0012484;EVM0020836;EVM0011776;EVM0012726;EVM0008102;EVM0009516;EVM0001971;EVM0009443;EVM0008555;EVM0008313
GO:0009891	positive regulation of biosynthetic process	1	biological_process	EVM0013628;EVM0015503;EVM0005842;EVM0002907;EVM0003043;EVM0009977;EVM0020029;EVM0003065;EVM0012792;EVM0017304;EVM0014897;EVM0014413;EVM0014170;EVM0004561;EVM0004242;EVM0007680;EVM0002087;EVM0015392;EVM0009516;EVM0017525;EVM0016434;EVM0009217;EVM0012387;EVM0001971
GO:0046907	intracellular transport	1	biological_process	EVM0008756;EVM0005942;EVM0006713;EVM0023313;EVM0007767;EVM0009612;EVM0001735;EVM0005636;EVM0011581;EVM0001510;EVM0000332;EVM0000858;EVM0022376;EVM0008109;EVM0023087;EVM0006895;EVM0016909;EVM0012925;EVM0002813;EVM0014442;EVM0020503;EVM0009516;EVM0008896;EVM0011635;EVM0001021;EVM0000224;EVM0008313
GO:0098588	bounding membrane of organelle	1	cellular_component	EVM0016893;EVM0005263;EVM0021896;EVM0021899;EVM0019507;EVM0017617;EVM0007633;EVM0020663;EVM0013741;EVM0014022;EVM0015970;EVM0008752;EVM0015409;EVM0020109;EVM0004238;EVM0020747;EVM0007767;EVM0009610;EVM0001735;EVM0004143;EVM0010273;EVM0015177;EVM0022501;EVM0024456;EVM0009600;EVM0001120;EVM0007026;EVM0020769;EVM0021751;EVM0019212;EVM0017958;EVM0011750;EVM0008414;EVM0004746;EVM0008674;EVM0011801;EVM…
GO:0007165	signal transduction	1	biological_process	EVM0017617;EVM0010829;EVM0018481;EVM0005842;EVM0001611;EVM0009610;EVM0020179;EVM0003043;EVM0014779;EVM0015226;EVM0013846;EVM0022220;EVM0023843;EVM0015304;EVM0023069;EVM0023117;EVM0020029;EVM0017790;EVM0013676;EVM0012792;EVM0000456;EVM0014897;EVM0004561;EVM0018368;EVM0015269;EVM0007200;EVM0001693;EVM0012708;EVM0002349;EVM0008295;EVM0023400;EVM0020197;EVM0000626;EVM0001449;EVM0023986;EVM0004242;EVM…
GO:0016072	rRNA metabolic process	1	biological_process	EVM0000265;EVM0021627;EVM0000678;EVM0006998;EVM0010428;EVM0011776;EVM0017648;EVM0017392;EVM0002041;EVM0015510
GO:0005984	disaccharide metabolic process	1	biological_process	EVM0016858;EVM0006730;EVM0015916;EVM0001078;EVM0013976;EVM0001209
GO:0009314	response to radiation	1	biological_process	EVM0018481;EVM0016409;EVM0002664;EVM0018861;EVM0001611;EVM0020693;EVM0018063;EVM0015501;EVM0017033;EVM0013664;EVM0015304;EVM0023595;EVM0015155;EVM0015201;EVM0007717;EVM0003065;EVM0011904;EVM0020497;EVM0005155;EVM0017168;EVM0012101;EVM0001888;EVM0021706;EVM0008849;EVM0020059;EVM0001672;EVM0001678;EVM0014431;EVM0015693;EVM0008102;EVM0000626;EVM0013544;EVM0009889;EVM0012871;EVM0011941;EVM0020852;EVM…
GO:0032446	protein modification by small protein conjugation	1	biological_process	EVM0013030;EVM0020322;EVM0023483;EVM0024588;EVM0023101;EVM0001636;EVM0001876;EVM0004637;EVM0007119;EVM0022376;EVM0019549;EVM0012147;EVM0022139;EVM0015390;EVM0012449;EVM0014655;EVM0014729;EVM0024152;EVM0001021;EVM0006216
GO:0097306	cellular response to alcohol	1	biological_process	EVM0010829;EVM0018481;EVM0022220;EVM0023069;EVM0023117;EVM0014897;EVM0018368;EVM0015269;EVM0008295;EVM0023400;EVM0023986;EVM0013976;EVM0010793;EVM0009160;EVM0012387;EVM0006216
GO:0005730	nucleolus	1	cellular_component	EVM0021412;EVM0008756;EVM0016501;EVM0013310;EVM0000250;EVM0006713;EVM0023262;EVM0011254;EVM0013856;EVM0009977;EVM0009974;EVM0015226;EVM0024219;EVM0015239;EVM0002389;EVM0001717;EVM0014795;EVM0000678;EVM0018633;EVM0006998;EVM0017753;EVM0011581;EVM0011811;EVM0001853;EVM0010428;EVM0011776;EVM0018604;EVM0021859;EVM0017392;EVM0022341;EVM0018134;EVM0003178;EVM0022658;EVM0011850;EVM0016434;EVM0014270;EVM…
GO:0022891	substrate-specific transmembrane transporter activity	1	molecular_function	EVM0021899;EVM0009836;EVM0004729;EVM0008688;EVM0020321;EVM0002483;EVM0004238;EVM0005056;EVM0002019;EVM0021751;EVM0022157;EVM0024272;EVM0006195;EVM0020708;EVM0011379;EVM0023734;EVM0012251;EVM0019154;EVM0008067;EVM0006463;EVM0001186;EVM0004343;EVM0018387;EVM0012722;EVM0021486;EVM0010169;EVM0001335;EVM0000551;EVM0020451;EVM0016127;EVM0010713;EVM0021733;EVM0000309;EVM0015079;EVM0021201;EVM0002099;EVM…
GO:0042278	purine nucleoside metabolic process	1	biological_process	EVM0005842;EVM0008752;EVM0015409;EVM0020694;EVM0014696;EVM0009612;EVM0002332;EVM0011944;EVM0022501;EVM0007158;EVM0015501;EVM0015304;EVM0015155;EVM0014150;EVM0009289;EVM0006195;EVM0004561;EVM0023734;EVM0006859;EVM0000332;EVM0012484;EVM0020836;EVM0011776;EVM0012726;EVM0008102;EVM0009516;EVM0001971;EVM0009443;EVM0008555;EVM0008313
GO:0042886	amide transport	1	biological_process	EVM0004842;EVM0008756;EVM0015409;EVM0005942;EVM0023313;EVM0009612;EVM0016866;EVM0001735;EVM0011581;EVM0001510;EVM0022376;EVM0012726;EVM0008109;EVM0005230;EVM0001335;EVM0015240;EVM0023184;EVM0002813;EVM0014442;EVM0020503;EVM0009516;EVM0008896;EVM0011635;EVM0001021;EVM0008313
GO:0009141	nucleoside triphosphate metabolic process	1	biological_process	EVM0005842;EVM0008752;EVM0015409;EVM0020694;EVM0014696;EVM0009612;EVM0002332;EVM0011944;EVM0022501;EVM0007158;EVM0015501;EVM0015304;EVM0015155;EVM0014150;EVM0009289;EVM0006195;EVM0004561;EVM0023734;EVM0006859;EVM0000332;EVM0012484;EVM0020836;EVM0011776;EVM0012726;EVM0008102;EVM0009516;EVM0001971;EVM0009443;EVM0008555;EVM0008313
[truncated: 152 more rows]
