# Supplementary material for: Retracted Article: Investigation of yellow horn (Xanthoceras sorbifolia Bunge) transcriptome in response to different abiotic stresses: a comparative RNA-Seq study
Source: PubMed Central journal article supplement — RSC Adv. 2020 Feb 12;10(11):6512–9. doi: 10.1039/c9ra09535g (PMC9049705; doi:10.1039/c9ra09535g), 2020-02-12
Supplement: RA-010-C9RA09535G-s001.pdf [file RA-010-C9RA09535G-s001.pdf]

## Supporting Information

**Investigation of Yellow horn (*Xanthoceras sorbifolia* Bunge) transcriptome in response to different abiotic stresses: a comparative RNA-seq study**

Yanhe Lang,<sup>\*a</sup> Zhi Liu<sup>a</sup> and Zhimin Zheng<sup>a</sup>

State Key Laboratory of Tree Genetics and Breeding Laboratory, Ministry of Education; Alkali Soil Natural Environmental Science Center (ASNESC); College of Life Science, Northeast Forestry University, Harbin, Heilongjiang Province, China.

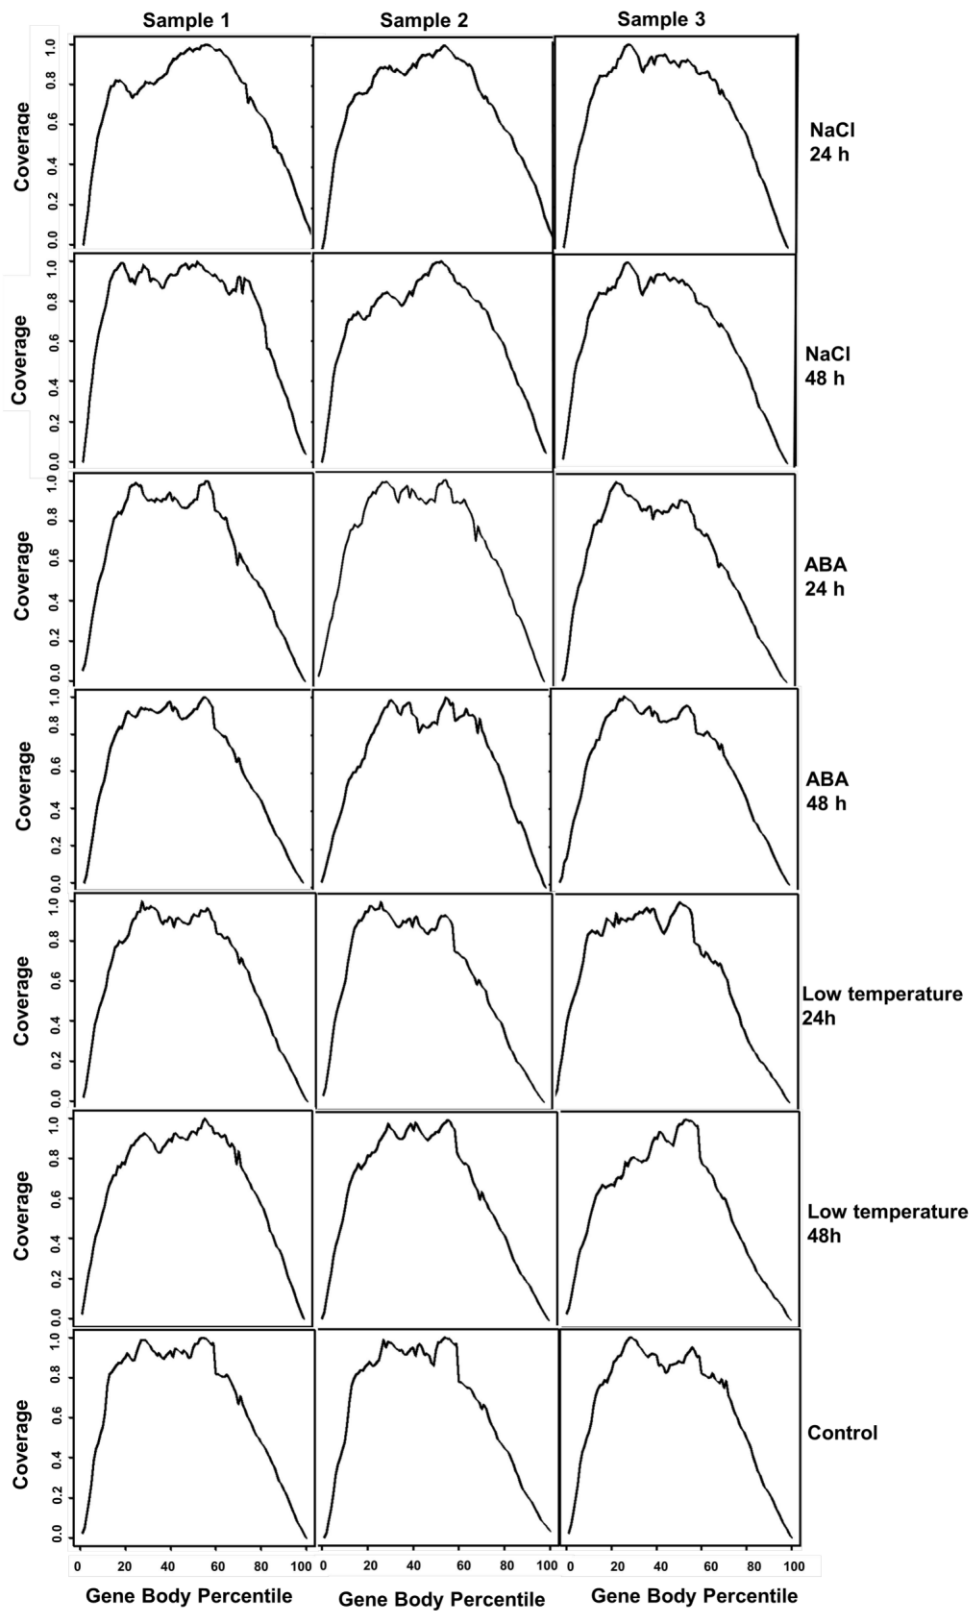

Figure S1 The coverage curve of the transcriptomic data of different samples



**Supplementary Table S1.** Overview of RNA-Seq data output and mapping results

| Sample          | Time point | Replicate | Number of reads   |                                             |                                        |                            |
|-----------------|------------|-----------|-------------------|---------------------------------------------|----------------------------------------|----------------------------|
|                 |            |           | Total - raw reads | Total - after quality trimming <sup>1</sup> | Uniquely mapped on genome <sup>2</sup> | Mapping rate on genome [%] |
| control         |            | 1         | 50,653,088        | 50,161,196                                  | 44,479,859                             | 88.7                       |
|                 |            | 2         | 40,745,500        | 40,203,618                                  | 35,804,534                             | 89.1                       |
|                 |            | 3         | 46,000,360        | 45,445,168                                  | 39,128,136                             | 86.1                       |
| Salt            | 24 h       | 1         | 42,058,228        | 41,646,438                                  | 36,138,648                             | 86.8                       |
|                 |            | 2         | 45,285,122        | 44,761,840                                  | 40,127,373                             | 89.6                       |
|                 |            | 3         | 55,933,188        | 55,403,494                                  | 49,978,008                             | 90.2                       |
| Salt            | 48h        | 1         | 43,105,030        | 42,754,964                                  | 34,321,254                             | 80.3                       |
|                 |            | 2         | 53,819,966        | 53,257,942                                  | 45,410,985                             | 85.3                       |
|                 |            | 3         | 39,895,654        | 39,616,180                                  | 35,751,098                             | 90.2                       |
| ABA             | 24 h       | 1         | 43,273,006        | 42,778,160                                  | 35,295,058                             | 82.5                       |
|                 |            | 2         | 40,713,724        | 40,343,384                                  | 35,830,074                             | 88.8                       |
|                 |            | 3         | 46,117,468        | 45,553,816                                  | 35,897,963                             | 78.8                       |
| ABA             | 48 h       | 1         | 43,613,520        | 43,252,580                                  | 37,513,665                             | 86.7                       |
|                 |            | 2         | 37,529,608        | 37,529,608                                  | 31,625,190                             | 84.3                       |
|                 |            | 3         | 44,601,064        | 43,562,364                                  | 37,096,023                             | 85.2                       |
| Low temperature | 24 h       | 1         | 39,228,300        | 38,822,140                                  | 33,886,112                             | 87.3                       |
|                 |            | 2         | 43,648,666        | 43,046,002                                  | 38,415,396                             | 89.2                       |
|                 |            | 3         | 47,437,694        | 46,696,640                                  | 37,763,067                             | 80.9                       |
| Low temperature | 48 h       | 1         | 42,816,164        | 42,431,798                                  | 35,943,154                             | 84.7                       |
|                 |            | 2         | 50,699,394        | 50,135,954                                  | 44,117,592                             | 88.0                       |
|                 |            | 3         | 43,541,178        | 43,056,322                                  | 38,186,343                             | 88.7                       |

<sup>1</sup> Trimming by quality scores and ambiguous nucleotides of sequence ends

<sup>2</sup> Mapped to the IBSC v2 reference genome (Mascher et al., 2017)

<sup>3</sup> Removal of stacked reads i.e. redundant reads sharing same start and end coordinates, direction

<sup>4</sup> Mapped to the annotated gene model v2.36

**Table S2. Comprehensive list of the differential expression analysis. For differentially expressed genes.**

| Gene ID    | Position | functional annotation            | Salt 24h            |          | ABA 24h             |         |
|------------|----------|----------------------------------|---------------------|----------|---------------------|---------|
|            |          |                                  | log <sub>2</sub> FC | q-value  | log <sub>2</sub> FC | q-value |
| EVM0011959 | LG1      | (+)-neomenthol dehydrogenase     | not DE              | not DE   | not DE              | not DE  |
| EVM0003329 | LG1      | (+)-neomenthol dehydrogenase     | not DE              | not DE   | not DE              | not DE  |
| EVM0016861 | LG1      | (+)-neomenthol dehydrogenase     | not DE              | not DE   | not DE              | not DE  |
| EVM0017816 | LG1      | (RS)-norcoclaurine 6-O-methyl    | not DE              | not DE   | not DE              | not DE  |
| EVM0004629 | LG1      | (RS)-norcoclaurine 6-O-methyl    | not DE              | not DE   | not DE              | not DE  |
| EVM0021856 | LG1      | (RS)-norcoclaurine 6-O-methyl    | -4.07311            | 0.002664 | not DE              | not DE  |
| EVM0022505 | LG1      | (RS)-norcoclaurine 6-O-methyl    | not DE              | not DE   | not DE              | not DE  |
| EVM0011745 | LG1      | 10-deacetylbaocatin III 10-O     | not DE              | not DE   | not DE              | not DE  |
| EVM0019351 | LG1      | 11-beta-hydroxysteroid dehydro   | not DE              | not DE   | not DE              | not DE  |
| EVM0017861 | LG1      | 18 kDa seed maturation protein   | not DE              | not DE   | not DE              | not DE  |
| EVM0003656 | LG1      | 20 kDa chaperonin, chloroplast   | -1.37645            | 0.000104 | not DE              | not DE  |
| EVM0012776 | LG1      | 21 kDa protein                   | 1.116126            | 0.002738 | 1.361452            | 0.00014 |
| EVM0018909 | LG1      | 40S ribosomal protein S15-like   | not DE              | not DE   | not DE              | not DE  |
| EVM0010951 | LG1      | 40S ribosomal protein S20-1      | not DE              | not DE   | not DE              | not DE  |
| EVM0012986 | LG1      | 40S ribosomal protein S20-2      | not DE              | not DE   | not DE              | not DE  |
| EVM0010393 | LG1      | 50S ribosomal protein L1, chlor  | 1.073295            | 0.004857 | not DE              | not DE  |
| EVM0002479 | LG1      | 50S ribosomal protein L12-1,     | not DE              | not DE   | not DE              | not DE  |
| EVM0016422 | LG1      | 50S ribosomal protein L27, chlor | not DE              | not DE   | 1.694915            | 0.02433 |
| EVM0023010 | LG1      | 50S ribosomal protein L27, chlor | not DE              | not DE   | 1.098443            | 0.00247 |
| EVM0002123 | LG1      | 60S ribosomal protein L11-1      | not DE              | not DE   | not DE              | not DE  |
| EVM0001870 | LG1      | 60S ribosomal protein L19-1      | not DE              | not DE   | not DE              | not DE  |
| EVM0009554 | LG1      | 60S ribosomal protein L27a-3     | not DE              | not DE   | not DE              | not DE  |
| EVM0000358 | LG1      | 60S ribosomal protein L32-1      | not DE              | not DE   | 1.062432            | 0.00503 |
| EVM0001853 | LG1      | 60S ribosomal protein L6-1-like  | not DE              | not DE   | not DE              | not DE  |
| EVM0004610 | LG1      | 60S ribosomal protein L7a        | not DE              | not DE   | not DE              | not DE  |
| EVM0001367 | LG1      | 65-kDa microtubule-associated    | not DE              | not DE   | 2.173092            | 0.01727 |
| EVM0017433 | LG1      | ABC transporter B family membe   | not DE              | not DE   | not DE              | not DE  |
| EVM0007941 | LG1      | ABC transporter I family membe   | not DE              | not DE   | not DE              | not DE  |
| EVM0008406 | LG1      | ADP-ribosylation factor 2-like   | not DE              | not DE   | not DE              | not DE  |
| EVM0016097 | LG1      | ADP-ribosylation factor GTPase   | not DE              | not DE   | not DE              | not DE  |
| EVM0022857 | LG1      | ADP-ribosylation factor-like     | not DE              | not DE   | not DE              | not DE  |
| EVM0021132 | LG1      | AT-rich interactive domain-cont  | not DE              | not DE   | not DE              | not DE  |
| EVM0015526 | LG1      | ATP-dependent Clp protease p     | not DE              | not DE   | not DE              | not DE  |
| EVM0016132 | LG1      | ATP-dependent DNA helicase s     | not DE              | not DE   | not DE              | not DE  |
| EVM0002657 | LG1      | ATP-dependent helicase rhp16     | not DE              | not DE   | not DE              | not DE  |
| EVM0017804 | LG1      | ATP-dependent zinc metallopro    | not DE              | not DE   | not DE              | not DE  |
| EVM0019460 | LG1      | B-cell receptor-associated p     | not DE              | not DE   | not DE              | not DE  |
| EVM0022199 | LG1      | BAG family molecular chaperon    | not DE              | not DE   | not DE              | not DE  |
| EVM0019239 | LG1      | BTB/POZ domain-containing pr     | not DE              | not DE   | not DE              | not DE  |
| EVM0000412 | LG1      | BTB/POZ domain-containing pr     | not DE              | not DE   | not DE              | not DE  |
| EVM0012479 | LG1      | BTB/POZ domain-containing pr     | not DE              | not DE   | not DE              | not DE  |
| EVM0015377 | LG1      | C2 domain-containing protein     | not DE              | not DE   | not DE              | not DE  |
| EVM0004289 | LG1      | CASP-like protein At5g40300      | not DE              | not DE   | not DE              | not DE  |
| EVM0009425 | LG1      | CASP-like protein At5g40300      | not DE              | not DE   | not DE              | not DE  |
| EVM0012080 | LG1      | CBS domain-containing protein    | not DE              | not DE   | not DE              | not DE  |
| EVM0016558 | LG1      | CLAVATA3/ESR (CLE)-related p     | not DE              | not DE   | not DE              | not DE  |
| EVM0016565 | LG1      | CRAL-TRIO domain-containing      | not DE              | not DE   | 1.876943            | 0.03148 |
| EVM0006414 | LG1      | CTP synthase                     | not DE              | not DE   | not DE              | not DE  |
| EVM0021221 | LG1      | DELLA protein RGL1-like          | not DE              | not DE   | not DE              | not DE  |

|            |     |                              |          |          |          |         |
|------------|-----|------------------------------|----------|----------|----------|---------|
| EVM0021882 | LG1 | DNA (cytosine-5)-methyltrans | not DE   | not DE   | not DE   | not DE  |
| EVM0006407 | LG1 | DNA (cytosine-5)-methyltrans | not DE   | not DE   | not DE   | not DE  |
| EVM0020094 | LG1 | DNA cross-link repair protei | not DE   | not DE   | not DE   | not DE  |
| EVM0008299 | LG1 | DNA mismatch repair protein  | not DE   | not DE   | not DE   | not DE  |
| EVM0012163 | LG1 | DNA repair protein RAD51 hom | not DE   | not DE   | not DE   | not DE  |
| EVM0014931 | LG1 | DNA repair protein RAD51 hom | 3.179314 | 0.001245 | not DE   | not DE  |
| EVM0006563 | LG1 | DNA repair protein UVH3 isof | not DE   | not DE   | not DE   | not DE  |
| EVM0001686 | LG1 | DNA repair protein UVH3-like | not DE   | not DE   | not DE   | not DE  |
| EVM0009074 | LG1 | DNA replication ATP-dependen | not DE   | not DE   | not DE   | not DE  |
| EVM0001710 | LG1 | DNA-directed RNA polymerase  | not DE   | not DE   | not DE   | not DE  |
| EVM0020257 | LG1 | E3 ubiquitin-protein ligase  | not DE   | not DE   | not DE   | not DE  |
| EVM0022436 | LG1 | E3 ubiquitin-protein ligase  | not DE   | not DE   | not DE   | not DE  |
| EVM0003854 | LG1 | E3 ubiquitin-protein ligase  | not DE   | not DE   | not DE   | not DE  |
| EVM0013852 | LG1 | ELMO domain-containing prote | not DE   | not DE   | not DE   | not DE  |
| EVM0004182 | LG1 | ELMO domain-containing prote | not DE   | not DE   | not DE   | not DE  |
| EVM0018007 | LG1 | F-box protein At2g27310-like | -1.09016 | 0.007954 | not DE   | not DE  |
| EVM0020522 | LG1 | F-box protein At5g51370-like | not DE   | not DE   | not DE   | not DE  |
| EVM0000445 | LG1 | F-box/LRR-repeat protein 3-l | not DE   | not DE   | not DE   | not DE  |
| EVM0015782 | LG1 | F-box/kelch-repeat protein A | not DE   | not DE   | not DE   | not DE  |
| EVM0017136 | LG1 | F-box/kelch-repeat protein A | not DE   | not DE   | not DE   | not DE  |
| EVM0017501 | LG1 | F-box/kelch-repeat protein C | not DE   | not DE   | not DE   | not DE  |
| EVM0017701 | LG1 | F-box/kelch-repeat protein S | not DE   | not DE   | not DE   | not DE  |
| EVM0022043 | LG1 | F-box/kelch-repeat protein S | not DE   | not DE   | not DE   | not DE  |
| EVM0007316 | LG1 | G-type lectin S-receptor-lik | not DE   | not DE   | not DE   | not DE  |
| EVM0009484 | LG1 | G-type lectin S-receptor-lik | not DE   | not DE   | not DE   | not DE  |
| EVM0017071 | LG1 | G-type lectin S-receptor-lik | not DE   | not DE   | not DE   | not DE  |
| EVM0014002 | LG1 | G-type lectin S-receptor-lik | not DE   | not DE   | not DE   | not DE  |
| EVM0024030 | LG1 | GABA transporter 1-like isof | not DE   | not DE   | not DE   | not DE  |
| EVM0013410 | LG1 | GDSL esterase/lipase At2g429 | not DE   | not DE   | not DE   | not DE  |
| EVM0018020 | LG1 | GDSL esterase/lipase At5g144 | not DE   | not DE   | not DE   | not DE  |
| EVM0010080 | LG1 | HUA2-like protein 3-like iso | not DE   | not DE   | -1.08754 | #####   |
| EVM0013364 | LG1 | K(+) efflux antiporter 2, ch | not DE   | not DE   | not DE   | not DE  |
| EVM0022014 | LG1 | L-gulonolactone oxidase-like | not DE   | not DE   | not DE   | not DE  |
| EVM0008099 | LG1 | LIM domain and RING finger p | not DE   | not DE   | not DE   | not DE  |
| EVM0021894 | LG1 | LOW QUALITY PROTEIN: BAG fam | not DE   | not DE   | not DE   | not DE  |
| EVM0002293 | LG1 | LOW QUALITY PROTEIN: probabl | not DE   | not DE   | not DE   | not DE  |
| EVM0007288 | LG1 | LOW QUALITY PROTEIN: probabl | not DE   | not DE   | not DE   | not DE  |
| EVM0013293 | LG1 | LRR receptor-like serine/thr | not DE   | not DE   | not DE   | not DE  |
| EVM0003263 | LG1 | LRR receptor-like serine/thr | not DE   | not DE   | not DE   | not DE  |
| EVM0007524 | LG1 | LRR receptor-like serine/thr | not DE   | not DE   | not DE   | not DE  |
| EVM0019666 | LG1 | LRR receptor-like serine/thr | not DE   | not DE   | -1.02065 | 0.00348 |
| EVM0009664 | LG1 | NAC domain-containing protei | not DE   | not DE   | not DE   | not DE  |
| EVM0001741 | LG1 | NACHT, LRR and PYD domains-c | not DE   | not DE   | not DE   | not DE  |
| EVM0005816 | LG1 | NAD-dependent malic enzyme 5 | not DE   | not DE   | not DE   | not DE  |
| EVM0010681 | LG1 | NAD-dependent protein deacet | not DE   | not DE   | not DE   | not DE  |
| EVM0005503 | LG1 | O-acyltransferase WSD1-like  | not DE   | not DE   | not DE   | not DE  |
| EVM0009058 | LG1 | O-acyltransferase WSD1-like  | not DE   | not DE   | not DE   | not DE  |
| EVM0016921 | LG1 | O-acyltransferase WSD1-like  | -1.88234 | 0.042287 | not DE   | not DE  |
| EVM0021265 | LG1 | O-acyltransferase WSD1-like  | not DE   | not DE   | not DE   | not DE  |
| EVM0001693 | LG1 | O-glucosyltransferase rumi h | not DE   | not DE   | not DE   | not DE  |
| EVM0022984 | LG1 | RING finger protein 10-like  | not DE   | not DE   | not DE   | not DE  |
| EVM0006955 | LG1 | RING-H2 finger protein ATL16 | not DE   | not DE   | not DE   | not DE  |
| EVM0021597 | LG1 | RING-H2 finger protein ATL64 | 4.506277 | 0.00083  | not DE   | not DE  |
| EVM0011432 | LG1 | RING-H2 finger protein ATL67 | not DE   | not DE   | 1.126717 | 0.00956 |

|            |     |                              |          |          |          |         |
|------------|-----|------------------------------|----------|----------|----------|---------|
| EVM0013651 | LG1 | RNA exonuclease 4-like       | not DE   | not DE   | not DE   | not DE  |
| EVM0022599 | LG1 | RNA polymerase II subunit 5' | 1.405112 | 0.000619 | not DE   | not DE  |
| EVM0003149 | LG1 | RPM1-interacting protein 4-l | not DE   | not DE   | not DE   | not DE  |
| EVM0021326 | LG1 | S-adenosylmethionine synthas | not DE   | not DE   | not DE   | not DE  |
| EVM0013926 | LG1 | S-type anion channel SLAH1-l | not DE   | not DE   | not DE   | not DE  |
| EVM0004834 | LG1 | SNF1-related protein kinase  | -3.65279 | 0.022726 | not DE   | not DE  |
| EVM0003876 | LG1 | SPX domain-containing membra | not DE   | not DE   | not DE   | not DE  |
| EVM0019377 | LG1 | SPX domain-containing protei | not DE   | not DE   | not DE   | not DE  |
| EVM0006081 | LG1 | SUMO-activating enzyme subun | not DE   | not DE   | not DE   | not DE  |
| EVM0019549 | LG1 | SUMO-activating enzyme subun | not DE   | not DE   | not DE   | not DE  |
| EVM0021982 | LG1 | T-complex protein 1 subunit  | not DE   | not DE   | not DE   | not DE  |
| EVM0007724 | LG1 | TITAN-like protein-like      | not DE   | not DE   | not DE   | not DE  |
| EVM0014998 | LG1 | TOM1-like protein 1-like iso | not DE   | not DE   | not DE   | not DE  |
| EVM0007841 | LG1 | U5 small nuclear ribonucleop | 1.387477 | 0.018357 | not DE   | not DE  |
| EVM0019884 | LG1 | U6 snRNA-associated Sm-like  | not DE   | not DE   | not DE   | not DE  |
| EVM0011398 | LG1 | UDP-glucuronic acid decarbox | not DE   | not DE   | not DE   | not DE  |
| EVM0010626 | LG1 | UDP-glycosyltransferase 73B4 | not DE   | not DE   | not DE   | not DE  |
| EVM0014356 | LG1 | UPF0392 protein RCOM_0530710 | not DE   | not DE   | not DE   | not DE  |
| EVM0024200 | LG1 | UPF0481 protein At3g47200-li | not DE   | not DE   | not DE   | not DE  |
| EVM0021659 | LG1 | UPF0565 protein C2orf69 homo | not DE   | not DE   | not DE   | not DE  |
| EVM0013285 | LG1 | UV-stimulated scaffold prote | not DE   | not DE   | not DE   | not DE  |
| EVM0001145 | LG1 | WAT1-related protein At3g280 | not DE   | not DE   | not DE   | not DE  |
| EVM0020532 | LG1 | WAT1-related protein At4g083 | not DE   | not DE   | not DE   | not DE  |
| EVM0000754 | LG1 | WD repeat and FYVE domain-co | not DE   | not DE   | -1.02561 | 0.00852 |
| EVM0008490 | LG1 | WD repeat-containing protei  | not DE   | not DE   | not DE   | not DE  |
| EVM0013418 | LG1 | WD repeat-containing protei  | not DE   | not DE   | not DE   | not DE  |
| EVM0019445 | LG1 | acetyl-CoA acetyltransferase | not DE   | not DE   | not DE   | not DE  |
| EVM0021845 | LG1 | acetylornithine deacetylase  | not DE   | not DE   | not DE   | not DE  |
| EVM0021333 | LG1 | actin-depolymerizing factor  | not DE   | not DE   | not DE   | not DE  |
| EVM0016582 | LG1 | actin-related protein 2      | not DE   | not DE   | not DE   | not DE  |
| EVM0019258 | LG1 | actin-related protein 2/3 co | not DE   | not DE   | not DE   | not DE  |
| EVM0020182 | LG1 | acyl-CoA-binding protein     | not DE   | not DE   | not DE   | not DE  |
| EVM0015430 | LG1 | acyltransferase-like protei  | not DE   | not DE   | not DE   | not DE  |
| EVM0006157 | LG1 | adenylate isopentenyltransfe | -2.5795  | 0.044007 | not DE   | not DE  |
| EVM0018581 | LG1 | alkylated DNA repair protei  | not DE   | not DE   | not DE   | not DE  |
| EVM0004080 | LG1 | alpha-1,6-mannosyl-glycoprot | not DE   | not DE   | not DE   | not DE  |
| EVM0011199 | LG1 | alpha-mannosidase 2x-like    | not DE   | not DE   | not DE   | not DE  |
| EVM0023662 | LG1 | aluminum-activated malate tr | not DE   | not DE   | not DE   | not DE  |
| EVM0020333 | LG1 | ankyrin repeat-containing pr | -2.40896 | 0.020479 | not DE   | not DE  |
| EVM0000348 | LG1 | ankyrin repeat-containing pr | not DE   | not DE   | not DE   | not DE  |
| EVM0016652 | LG1 | ankyrin repeat-containing pr | -3.43374 | 0.038242 | not DE   | not DE  |
| EVM0019095 | LG1 | ankyrin repeat-containing pr | not DE   | not DE   | not DE   | not DE  |
| EVM0021362 | LG1 | ankyrin repeat-containing pr | not DE   | not DE   | not DE   | not DE  |
| EVM0022709 | LG1 | ankyrin repeat-containing pr | not DE   | not DE   | not DE   | not DE  |
| EVM0023396 | LG1 | anthocyanidin reductase-like | not DE   | not DE   | not DE   | not DE  |
| EVM0023974 | LG1 | anthocyanidin reductase-like | not DE   | not DE   | 1.195983 | 0.00807 |
| EVM0015974 | LG1 | anthranilate N-methyltransfe | not DE   | not DE   | not DE   | not DE  |
| EVM0016505 | LG1 | anthranilate N-methyltransfe | not DE   | not DE   | 2.204148 | 0.00069 |
| EVM0021118 | LG1 | anthranilate N-methyltransfe | not DE   | not DE   | 1.939635 | 0.01052 |
| EVM0013653 | LG1 | aquaporin PIP1-3 isoform X1  | not DE   | not DE   | not DE   | not DE  |
| EVM0009240 | LG1 | aspartokinase 2, chloroplast | not DE   | not DE   | not DE   | not DE  |
| EVM0000208 | LG1 | auxin-induced protein 15A    | not DE   | not DE   | 1.053587 | 0.03844 |
| EVM0022630 | LG1 | auxin-responsive protein IAA | -2.08307 | 0.006073 | -1.47875 | 0.01134 |
| EVM0005326 | LG1 | beta-amylase 7-like isoform  | -1.06767 | 0.000991 | not DE   | not DE  |

|            |     |                               |          |          |          |         |
|------------|-----|-------------------------------|----------|----------|----------|---------|
| EVM0023279 | LG1 | beta-carotene isomerase D27,  | not DE   | not DE   | not DE   | not DE  |
| EVM0002995 | LG1 | beta-glucosidase 11-like      | not DE   | not DE   | not DE   | not DE  |
| EVM0002814 | LG1 | bidirectional sugar transport | not DE   | not DE   | not DE   | not DE  |
| EVM0008373 | LG1 | bidirectional sugar transport | not DE   | not DE   | not DE   | not DE  |
| EVM0016270 | LG1 | bidirectional sugar transport | not DE   | not DE   | not DE   | not DE  |
| EVM0016789 | LG1 | bidirectional sugar transport | not DE   | not DE   | not DE   | not DE  |
| EVM0005921 | LG1 | bifunctional 3-dehydroquinat  | not DE   | not DE   | 1.616122 | 0.0042  |
| EVM0022835 | LG1 | bifunctional protein Fold 2-  | not DE   | not DE   | not DE   | not DE  |
| EVM0013004 | LG1 | biogenesis of lysosome-relat  | not DE   | not DE   | not DE   | not DE  |
| EVM0017559 | LG1 | biogenesis of lysosome-relat  | not DE   | not DE   | not DE   | not DE  |
| EVM0019209 | LG1 | biorientation of chromosomes  | not DE   | not DE   | not DE   | not DE  |
| EVM0024055 | LG1 | biorientation of chromosomes  | not DE   | not DE   | not DE   | not DE  |
| EVM0015133 | LG1 | blue copper protein-like      | not DE   | not DE   | not DE   | not DE  |
| EVM0019409 | LG1 | blue-light photoreceptor PHR  | not DE   | not DE   | not DE   | not DE  |
| EVM0019651 | LG1 | caffeoylshikimate esterase-l  | not DE   | not DE   | not DE   | not DE  |
| EVM0020069 | LG1 | callose synthase 7-like isof  | not DE   | not DE   | not DE   | not DE  |
| EVM0019010 | LG1 | calmodulin-like protein 3     | not DE   | not DE   | 2.166105 | 0.01888 |
| EVM0014431 | LG1 | calvin cycle protein CP12-1,  | not DE   | not DE   | not DE   | not DE  |
| EVM0012270 | LG1 | cell division cycle 20.1, co  | not DE   | not DE   | not DE   | not DE  |
| EVM0013741 | LG1 | cellulose synthase-like prot  | not DE   | not DE   | not DE   | not DE  |
| EVM0008354 | LG1 | cellulose synthase-like prot  | not DE   | not DE   | not DE   | not DE  |
| EVM0009516 | LG1 | chaperone protein ClpC, chl   | not DE   | not DE   | not DE   | not DE  |
| EVM0017798 | LG1 | chaperone protein ClpD, chl   | not DE   | not DE   | not DE   | not DE  |
| EVM0019303 | LG1 | chitin elicitor receptor kin  | not DE   | not DE   | not DE   | not DE  |
| EVM0015297 | LG1 | chlorophyll a-b binding prot  | not DE   | not DE   | not DE   | not DE  |
| EVM0017589 | LG1 | chlorophyll a-b binding prot  | -2.76536 | 0.000145 | not DE   | not DE  |
| EVM0007193 | LG1 | chromatin modification-relat  | not DE   | not DE   | not DE   | not DE  |
| EVM0018462 | LG1 | chromodomain-helicase-DNA-bi  | not DE   | not DE   | not DE   | not DE  |
| EVM0003955 | LG1 | classical arabinogalactan pr  | not DE   | not DE   | not DE   | not DE  |
| EVM0017526 | LG1 | classical arabinogalactan pr  | not DE   | not DE   | not DE   | not DE  |
| EVM0004665 | LG1 | clathrin light chain 1-like   | not DE   | not DE   | not DE   | not DE  |
| EVM0017156 | LG1 | condensin complex subunit 2-  | not DE   | not DE   | not DE   | not DE  |
| EVM0007070 | LG1 | cucumisin-like isoform X1     | not DE   | not DE   | not DE   | not DE  |
| EVM0012757 | LG1 | cyclin-U4-1-like              | not DE   | not DE   | not DE   | not DE  |
| EVM0018792 | LG1 | cysteine-rich receptor-like   | not DE   | not DE   | not DE   | not DE  |
| EVM0000047 | LG1 | cysteine-rich repeat secret   | not DE   | not DE   | not DE   | not DE  |
| EVM0000843 | LG1 | cysteine-rich repeat secret   | not DE   | not DE   | not DE   | not DE  |
| EVM0001573 | LG1 | cysteine-rich repeat secret   | not DE   | not DE   | not DE   | not DE  |
| EVM0011876 | LG1 | cysteine-rich repeat secret   | not DE   | not DE   | not DE   | not DE  |
| EVM0013781 | LG1 | cysteine-rich repeat secret   | not DE   | not DE   | not DE   | not DE  |
| EVM0021819 | LG1 | cysteine-rich repeat secret   | not DE   | not DE   | not DE   | not DE  |
| EVM0012634 | LG1 | cysteine-rich repeat secret   | not DE   | not DE   | not DE   | not DE  |
| EVM0023371 | LG1 | cytochrome P450 704C1-like i  | not DE   | not DE   | not DE   | not DE  |
| EVM0008677 | LG1 | cytochrome P450 714C2-like    | not DE   | not DE   | not DE   | not DE  |
| EVM0021447 | LG1 | cytochrome P450 714C2-like    | not DE   | not DE   | not DE   | not DE  |
| EVM0015306 | LG1 | cytochrome P450 724B1-like    | not DE   | not DE   | not DE   | not DE  |
| EVM0021769 | LG1 | cytochrome P450 82C4-like     | not DE   | not DE   | not DE   | not DE  |
| EVM0008306 | LG1 | cytochrome P450 86B1-like     | not DE   | not DE   | not DE   | not DE  |
| EVM0009901 | LG1 | cytochrome P450 86B1-like     | not DE   | not DE   | not DE   | not DE  |
| EVM0011810 | LG1 | cytochrome P450 86B1-like     | not DE   | not DE   | not DE   | not DE  |
| EVM0013007 | LG1 | cytochrome P450 86B1-like     | not DE   | not DE   | not DE   | not DE  |
| EVM0021403 | LG1 | cytochrome P450 86B1-like     | not DE   | not DE   | not DE   | not DE  |
| EVM0002165 | LG1 | cytochrome P450 93A1-like     | not DE   | not DE   | not DE   | not DE  |
| EVM0017968 | LG1 | cytochrome P450 93A1-like     | not DE   | not DE   | not DE   | not DE  |

|            |     |                                |          |          |          |         |
|------------|-----|--------------------------------|----------|----------|----------|---------|
| EVM0006973 | LG1 | cytochrome P450 94A2-like      | not DE   | not DE   | not DE   | not DE  |
| EVM0014878 | LG1 | cytochrome b561 and DOMON do   | not DE   | not DE   | not DE   | not DE  |
| EVM0014397 | LG1 | cytochrome b6-f complex iron   | -1.22189 | 0.000244 | not DE   | not DE  |
| EVM0013252 | LG1 | dCTP pyrophosphatase 1-like    | not DE   | not DE   | not DE   | not DE  |
| EVM0000656 | LG1 | dentin sialophosphoprotein-1   | not DE   | not DE   | not DE   | not DE  |
| EVM0014047 | LG1 | deoxycytidylate deaminase      | not DE   | not DE   | 1.214539 | 0.00506 |
| EVM0001345 | LG1 | deoxynucleoside triphosphate   | not DE   | not DE   | not DE   | not DE  |
| EVM0021642 | LG1 | deoxynucleoside triphosphate   | not DE   | not DE   | not DE   | not DE  |
| EVM0009520 | LG1 | dephospho-CoA kinase domain    | not DE   | not DE   | not DE   | not DE  |
| EVM0012274 | LG1 | desiccation-related protein    | 7.649608 | 8.19E-08 | not DE   | not DE  |
| EVM0012759 | LG1 | desumoylating isopeptidase 1   | -2.19115 | 1.05E-09 | not DE   | not DE  |
| EVM0006489 | LG1 | differentially expressed in    | not DE   | not DE   | not DE   | not DE  |
| EVM0017140 | LG1 | disease resistance protein A   | not DE   | not DE   | not DE   | not DE  |
| EVM0009213 | LG1 | disease resistance protein R   | 2.935871 | 0.001483 | not DE   | not DE  |
| EVM0014117 | LG1 | dolichol-phosphate mannosylt   | not DE   | not DE   | not DE   | not DE  |
| EVM0023558 | LG1 | dolichol-phosphate mannosylt   | not DE   | not DE   | not DE   | not DE  |
| EVM0021952 | LG1 | dynamamin-related protein 1B-l | not DE   | not DE   | not DE   | not DE  |
| EVM0015431 | LG1 | dynamamin-related protein 1E-l | not DE   | not DE   | not DE   | not DE  |
| EVM0013248 | LG1 | early nodulin-20-like          | not DE   | not DE   | not DE   | not DE  |
| EVM0020426 | LG1 | early nodulin-like protein 1   | not DE   | not DE   | not DE   | not DE  |
| EVM0018140 | LG1 | embryonic stem cell-specific   | not DE   | not DE   | not DE   | not DE  |
| EVM0024149 | LG1 | endoglucanase 14-like          | not DE   | not DE   | not DE   | not DE  |
| EVM0015932 | LG1 | endoglucanase 25-like          | not DE   | not DE   | not DE   | not DE  |
| EVM0023138 | LG1 | endoribonuclease Dicer homol   | 1.609953 | 4.48E-08 | not DE   | not DE  |
| EVM0006624 | LG1 | ent-kaurenoic acid oxidase 2   | not DE   | not DE   | not DE   | not DE  |
| EVM0006858 | LG1 | ethylene-responsive transcri   | not DE   | not DE   | not DE   | not DE  |
| EVM0024549 | LG1 | ethylene-responsive transcri   | not DE   | not DE   | not DE   | not DE  |
| EVM0002503 | LG1 | ethylene-responsive transcri   | not DE   | not DE   | not DE   | not DE  |
| EVM0000408 | LG1 | ethylene-responsive transcri   | not DE   | not DE   | not DE   | not DE  |
| EVM0020258 | LG1 | eukaryotic translation initi   | not DE   | not DE   | not DE   | not DE  |
| EVM0013753 | LG1 | exocyst complex component SE   | not DE   | not DE   | not DE   | not DE  |
| EVM0007060 | LG1 | exopolygalacturonase           | not DE   | not DE   | not DE   | not DE  |
| EVM0005821 | LG1 | exosome complex component RR   | not DE   | not DE   | not DE   | not DE  |
| EVM0008259 | LG1 | eyes absent homolog 2-like i   | not DE   | not DE   | not DE   | not DE  |
| EVM0012919 | LG1 | fasciclin-like arabinogalact   | not DE   | not DE   | not DE   | not DE  |
| EVM0024054 | LG1 | fatty-acid-binding protein 1   | not DE   | not DE   | not DE   | not DE  |
| EVM0017743 | LG1 | feruloyl CoA ortho-hydroxyla   | not DE   | not DE   | not DE   | not DE  |
| EVM0010837 | LG1 | fidgetin-like protein 1-like   | not DE   | not DE   | not DE   | not DE  |
| EVM0009572 | LG1 | fimbrin-like protein 2-like    | -1.95965 | 0.019363 | not DE   | not DE  |
| EVM0010479 | LG1 | flavonol synthase/flavanone    | not DE   | not DE   | not DE   | not DE  |
| EVM0024135 | LG1 | formin-like protein 3          | not DE   | not DE   | not DE   | not DE  |
| EVM0009479 | LG1 | galacturonosyltransferase 8-   | not DE   | not DE   | not DE   | not DE  |
| EVM0016376 | LG1 | gamma carbonic anhydrase-lik   | not DE   | not DE   | not DE   | not DE  |
| EVM0011047 | LG1 | germin-like protein subfamil   | not DE   | not DE   | not DE   | not DE  |
| EVM0016424 | LG1 | glucan endo-1,3-beta-glucosi   | not DE   | not DE   | not DE   | not DE  |
| EVM0012224 | LG1 | glucan endo-1,3-beta-glucosi   | not DE   | not DE   | not DE   | not DE  |
| EVM0006176 | LG1 | glucose-6-phosphate 1-dehydr   | not DE   | not DE   | not DE   | not DE  |
| EVM0020408 | LG1 | glucose-6-phosphate 1-dehydr   | not DE   | not DE   | not DE   | not DE  |
| EVM0009606 | LG1 | glucuronoxylan 4-O-methyltra   | not DE   | not DE   | not DE   | not DE  |
| EVM0010912 | LG1 | glucuronoxylan 4-O-methyltra   | not DE   | not DE   | not DE   | not DE  |
| EVM0019723 | LG1 | glutamate dehydrogenase 2      | 3.033738 | 0.005288 | not DE   | not DE  |
| EVM0007699 | LG1 | glutamyl-tRNA(Gln) amidotran   | -3.29474 | 0.030402 | -4.14957 | 0.00337 |
| EVM0019172 | LG1 | glutaredoxin                   | not DE   | not DE   | 1.235671 | #####   |
| EVM0004557 | LG1 | glutaredoxin-C1-like           | not DE   | not DE   | not DE   | not DE  |

|            |     |                               |          |          |          |         |
|------------|-----|-------------------------------|----------|----------|----------|---------|
| EVM0013092 | LG1 | glycerol-3-phosphate acyltran | not DE   | not DE   | not DE   | not DE  |
| EVM0016618 | LG1 | glycerol-3-phosphate dehydro  | not DE   | not DE   | not DE   | not DE  |
| EVM0017183 | LG1 | glycine cleavage system H pr  | -1.11877 | 0.042932 | 1.020068 | 0.00033 |
| EVM0003965 | LG1 | glycine--tRNA ligase 2, chlo  | not DE   | not DE   | not DE   | not DE  |
| EVM0019323 | LG1 | glycine--tRNA ligase 2, chlo  | not DE   | not DE   | not DE   | not DE  |
| EVM0006494 | LG1 | glycine-rich RNA-binding pro  | 1.590047 | 0.024701 | 2.091048 | 0.00092 |
| EVM0010324 | LG1 | granule-bound starch synthas  | -1.57695 | 1.73E-07 | not DE   | not DE  |
| EVM0022342 | LG1 | growth-regulating factor 9 in | not DE   | not DE   | not DE   | not DE  |
| EVM0018288 | LG1 | heat shock factor protein HS  | not DE   | not DE   | not DE   | not DE  |
| EVM0000212 | LG1 | high mobility group B protei  | not DE   | not DE   | not DE   | not DE  |
| EVM0023627 | LG1 | histidine-containing phospho  | not DE   | not DE   | not DE   | not DE  |
| EVM0022388 | LG1 | histone H2AX-like             | not DE   | not DE   | not DE   | not DE  |
| EVM0022202 | LG1 | histone H3-like centromeric   | not DE   | not DE   | not DE   | not DE  |
| EVM0017318 | LG1 | histone deacetylase complex   | not DE   | not DE   | not DE   | not DE  |
| EVM0024446 | LG1 | histone-lysine N-methyltrans  | not DE   | not DE   | not DE   | not DE  |
| EVM0010720 | LG1 | histone-lysine N-methyltrans  | not DE   | not DE   | not DE   | not DE  |
| EVM0020933 | LG1 | histone-lysine N-methyltrans  | not DE   | not DE   | not DE   | not DE  |
| EVM0021656 | LG1 | homeobox protein LUMINIDEPEN  | not DE   | not DE   | not DE   | not DE  |
| EVM0023907 | LG1 | hydroquinone glucosyltransfe  | not DE   | not DE   | not DE   | not DE  |
| EVM0013397 | LG1 | hyoscyamine 6-dioxygenase-li  | not DE   | not DE   | not DE   | not DE  |
| EVM0011581 | LG1 | importin subunit alpha-like   | not DE   | not DE   | not DE   | not DE  |
| EVM0021987 | LG1 | inactive TPR repeat-containi  | not DE   | not DE   | not DE   | not DE  |
| EVM0002912 | LG1 | inactive poly                 | not DE   | not DE   | not DE   | not DE  |
| EVM0019787 | LG1 | isoamylase 2, chloroplastic-  | not DE   | not DE   | not DE   | not DE  |
| EVM0002084 | LG1 | isocitrate dehydrogenase      | not DE   | not DE   | not DE   | not DE  |
| EVM0005539 | LG1 | ketol-acid reductoisomerase,  | not DE   | not DE   | not DE   | not DE  |
| EVM0011275 | LG1 | ketol-acid reductoisomerase,  | not DE   | not DE   | not DE   | not DE  |
| EVM0011369 | LG1 | ketol-acid reductoisomerase,  | not DE   | not DE   | not DE   | not DE  |
| EVM0012450 | LG1 | late embryogenesis abundant   | not DE   | not DE   | not DE   | not DE  |
| EVM0013763 | LG1 | light-regulated protein       | not DE   | not DE   | 4.562301 | #####   |
| EVM0017700 | LG1 | light-regulated protein       | not DE   | not DE   | not DE   | not DE  |
| EVM0001085 | LG1 | lish domain-containing prote  | not DE   | not DE   | not DE   | not DE  |
| EVM0014006 | LG1 | lysine histidine transporter  | not DE   | not DE   | not DE   | not DE  |
| EVM0018825 | LG1 | lysine histidine transporter  | not DE   | not DE   | not DE   | not DE  |
| EVM0021637 | LG1 | lysine-specific demethylase   | not DE   | not DE   | not DE   | not DE  |
| EVM0008660 | LG1 | lysosomal alpha-mannosidase-  | not DE   | not DE   | not DE   | not DE  |
| EVM0015684 | LG1 | lysosomal alpha-mannosidase-  | not DE   | not DE   | not DE   | not DE  |
| EVM0022549 | LG1 | lysosomal alpha-mannosidase-  | 1.026417 | 0.029207 | -1.02922 | 0.00052 |
| EVM0008220 | LG1 | magnesium transporter MRS2-I  | not DE   | not DE   | not DE   | not DE  |
| EVM0016686 | LG1 | mannan endo-1,4-beta-mannosi  | not DE   | not DE   | not DE   | not DE  |
| EVM0022086 | LG1 | mavicyanin-like               | not DE   | not DE   | not DE   | not DE  |
| EVM0010633 | LG1 | mediator of RNA polymerase I  | not DE   | not DE   | not DE   | not DE  |
| EVM0007105 | LG1 | mediator of RNA polymerase I  | not DE   | not DE   | not DE   | not DE  |
| EVM0000277 | LG1 | mediator of RNA polymerase I  | not DE   | not DE   | not DE   | not DE  |
| EVM0015554 | LG1 | membrane-anchored ubiquitin-  | not DE   | not DE   | not DE   | not DE  |
| EVM0023136 | LG1 | membrane-anchored ubiquitin-  | not DE   | not DE   | not DE   | not DE  |
| EVM0021990 | LG1 | metacaspase-1-like            | not DE   | not DE   | not DE   | not DE  |
| EVM0015677 | LG1 | metal tolerance protein 1-li  | not DE   | not DE   | not DE   | not DE  |
| EVM0010590 | LG1 | methyl-CpG-binding domain-co  | not DE   | not DE   | -1.01688 | 0.00127 |
| EVM0009715 | LG1 | methylcrotonoyl-CoA carboxyl  | not DE   | not DE   | -1.20795 | #####   |
| EVM0022568 | LG1 | mitochondrial carrier protei  | 1.172031 | 0.015917 | not DE   | not DE  |
| EVM0012615 | LG1 | mitochondrial import inner m  | not DE   | not DE   | not DE   | not DE  |
| EVM0012978 | LG1 | mitochondrial ribosome-assoc  | not DE   | not DE   | not DE   | not DE  |
| EVM0009665 | LG1 | monothiol glutaredoxin-S1-li  | not DE   | not DE   | not DE   | not DE  |

|            |     |                               |          |          |         |         |
|------------|-----|-------------------------------|----------|----------|---------|---------|
| EVM0010288 | LG1 | muscle M-line assembly prote  | not DE   | not DE   | not DE  | not DE  |
| EVM0001323 | LG1 | myb-like protein X-like isof  | not DE   | not DE   | not DE  | not DE  |
| EVM0013644 | LG1 | myb-related protein 315       | not DE   | not DE   | not DE  | not DE  |
| EVM0017196 | LG1 | myb-related protein Myb4-like | not DE   | not DE   | not DE  | not DE  |
| EVM0019397 | LG1 | myosin-11-like                | not DE   | not DE   | not DE  | not DE  |
| EVM0005700 | LG1 | nephrocystin-3-like           | not DE   | not DE   | not DE  | not DE  |
| EVM0011706 | LG1 | nitrogen regulatory protein   | not DE   | not DE   | not DE  | not DE  |
| EVM0009057 | LG1 | nodal modulator 2-like isof   | not DE   | not DE   | not DE  | not DE  |
| EVM0010261 | LG1 | nodal modulator 2-like isof   | not DE   | not DE   | not DE  | not DE  |
| EVM0023643 | LG1 | non-specific lipid-transfer   | not DE   | not DE   | not DE  | not DE  |
| EVM0011419 | LG1 | nuclear pore complex protein  | not DE   | not DE   | not DE  | not DE  |
| EVM0000075 | LG1 | nuclear pore membrane glycop  | not DE   | not DE   | not DE  | not DE  |
| EVM0019823 | LG1 | nuclear pore membrane glycop  | not DE   | not DE   | -1.6081 | 0.03341 |
| EVM0005325 | LG1 | nuclear pore membrane glycop  | not DE   | not DE   | not DE  | not DE  |
| EVM0006965 | LG1 | nuclear transcription factor  | not DE   | not DE   | not DE  | not DE  |
| EVM0018534 | LG1 | nuclear transcription factor  | not DE   | not DE   | not DE  | not DE  |
| EVM0014897 | LG1 | nuclear transcription factor  | not DE   | not DE   | not DE  | not DE  |
| EVM0021561 | LG1 | nucleolar GTP-binding protei  | not DE   | not DE   | not DE  | not DE  |
| EVM0014413 | LG1 | ocs element-binding factor l  | not DE   | not DE   | not DE  | not DE  |
| EVM0010843 | LG1 | oleosin 18.2 kDa-like         | not DE   | not DE   | not DE  | not DE  |
| EVM0012557 | LG1 | omega-hydroxypalmitate 0-fer  | not DE   | not DE   | not DE  | not DE  |
| EVM0018106 | LG1 | omega-hydroxypalmitate 0-fer  | not DE   | not DE   | not DE  | not DE  |
| EVM0021583 | LG1 | oxygen-evolving enhancer pro  | -1.77565 | 0.000549 | not DE  | not DE  |
| EVM0009902 | LG1 | paladin-like isoform X2       | not DE   | not DE   | not DE  | not DE  |
| EVM0023781 | LG1 | patatin-like protein 2        | not DE   | not DE   | not DE  | not DE  |
| EVM0007270 | LG1 | pectinesterase 2              | not DE   | not DE   | not DE  | not DE  |
| EVM0019670 | LG1 | pectinesterase 2              | not DE   | not DE   | not DE  | not DE  |
| EVM0010359 | LG1 | pectinesterase inhibitor      | not DE   | not DE   | not DE  | not DE  |
| EVM0010762 | LG1 | pectinesterase-like           | not DE   | not DE   | not DE  | not DE  |
| EVM0000023 | LG1 | pentatricopeptide repeat-con  | not DE   | not DE   | not DE  | not DE  |
| EVM0013962 | LG1 | pentatricopeptide repeat-con  | not DE   | not DE   | not DE  | not DE  |
| EVM0002870 | LG1 | pentatricopeptide repeat-con  | not DE   | not DE   | not DE  | not DE  |
| EVM0007192 | LG1 | pentatricopeptide repeat-con  | not DE   | not DE   | not DE  | not DE  |
| EVM0016964 | LG1 | pentatricopeptide repeat-con  | not DE   | not DE   | not DE  | not DE  |
| EVM0019822 | LG1 | pentatricopeptide repeat-con  | not DE   | not DE   | not DE  | not DE  |
| EVM0022368 | LG1 | pentatricopeptide repeat-con  | not DE   | not DE   | not DE  | not DE  |
| EVM0006787 | LG1 | pentatricopeptide repeat-con  | not DE   | not DE   | not DE  | not DE  |
| EVM0023179 | LG1 | pentatricopeptide repeat-con  | not DE   | not DE   | not DE  | not DE  |
| EVM0012465 | LG1 | pentatricopeptide repeat-con  | not DE   | not DE   | not DE  | not DE  |
| EVM0003044 | LG1 | pentatricopeptide repeat-con  | not DE   | not DE   | not DE  | not DE  |
| EVM0010015 | LG1 | pentatricopeptide repeat-con  | not DE   | not DE   | not DE  | not DE  |
| EVM0018357 | LG1 | pentatricopeptide repeat-con  | not DE   | not DE   | not DE  | not DE  |
| EVM0009922 | LG1 | pentatricopeptide repeat-con  | not DE   | not DE   | not DE  | not DE  |
| EVM0009980 | LG1 | pentatricopeptide repeat-con  | not DE   | not DE   | not DE  | not DE  |
| EVM0005907 | LG1 | pentatricopeptide repeat-con  | not DE   | not DE   | not DE  | not DE  |
| EVM0022228 | LG1 | pentatricopeptide repeat-con  | not DE   | not DE   | not DE  | not DE  |
| EVM0022120 | LG1 | pentatricopeptide repeat-con  | not DE   | not DE   | not DE  | not DE  |
| EVM0014469 | LG1 | pentatricopeptide repeat-con  | not DE   | not DE   | not DE  | not DE  |
| EVM0011926 | LG1 | pentatricopeptide repeat-con  | 1.334991 | 0.00242  | not DE  | not DE  |
| EVM0014044 | LG1 | pentatricopeptide repeat-con  | 1.56578  | 0.00024  | not DE  | not DE  |
| EVM0015253 | LG1 | pentatricopeptide repeat-con  | not DE   | not DE   | not DE  | not DE  |
| EVM0020997 | LG1 | pentatricopeptide repeat-con  | not DE   | not DE   | not DE  | not DE  |
| EVM0008755 | LG1 | pentatricopeptide repeat-con  | not DE   | not DE   | not DE  | not DE  |
| EVM0012833 | LG1 | pentatricopeptide repeat-con  | not DE   | not DE   | not DE  | not DE  |



|            |     |                               |          |          |          |        |
|------------|-----|-------------------------------|----------|----------|----------|--------|
| EVM0009697 | LG1 | peptide chain release factor  | not DE   | not DE   | not DE   | not DE |
| EVM0018448 | LG1 | peptide deformylase 1B, chl   | not DE   | not DE   | not DE   | not DE |
| EVM0018525 | LG1 | peptide deformylase 1B, chl   | not DE   | not DE   | 4.532768 | #####  |
| EVM0019490 | LG1 | peptide transporter PTR3-A-1  | -3.21822 | 0.000421 | not DE   | not DE |
| EVM0022742 | LG1 | peptidyl-prolyl cis-trans is  | not DE   | not DE   | not DE   | not DE |
| EVM0009946 | LG1 | peptidyl-prolyl cis-trans is  | not DE   | not DE   | not DE   | not DE |
| EVM0019210 | LG1 | peroxidase 27-like            | not DE   | not DE   | not DE   | not DE |
| EVM0001361 | LG1 | peroxidase 55-like            | not DE   | not DE   | not DE   | not DE |
| EVM0004369 | LG1 | peroxidase 55-like            | not DE   | not DE   | not DE   | not DE |
| EVM0012543 | LG1 | peroxidase 55-like            | not DE   | not DE   | not DE   | not DE |
| EVM0024070 | LG1 | peroxidase 55-like            | not DE   | not DE   | not DE   | not DE |
| EVM0021494 | LG1 | peroxidase 60-like            | not DE   | not DE   | not DE   | not DE |
| EVM0003956 | LG1 | peroxidase P7-like            | not DE   | not DE   | not DE   | not DE |
| EVM0013991 | LG1 | peroxisomal membrane protein  | not DE   | not DE   | not DE   | not DE |
| EVM0019268 | LG1 | peroxisomal membrane protein  | not DE   | not DE   | not DE   | not DE |
| EVM0006139 | LG1 | peroxisome biogenesis protein | not DE   | not DE   | not DE   | not DE |
| EVM0004699 | LG1 | pescadillo homolog            | not DE   | not DE   | not DE   | not DE |
| EVM0010845 | LG1 | peter Pan-like protein-like   | not DE   | not DE   | not DE   | not DE |
| EVM0021428 | LG1 | peter Pan-like protein-like   | not DE   | not DE   | not DE   | not DE |
| EVM0003797 | LG1 | phosducin-like protein 3      | not DE   | not DE   | not DE   | not DE |
| EVM0017255 | LG1 | phosphatidylinositol/phospha  | not DE   | not DE   | not DE   | not DE |
| EVM0024654 | LG1 | phosphoacetylglucosamine mut  | not DE   | not DE   | not DE   | not DE |
| EVM0000881 | LG1 | phosphoenolpyruvate carboxyl  | not DE   | not DE   | not DE   | not DE |
| EVM0012684 | LG1 | phosphoglucan phosphatase LS  | not DE   | not DE   | not DE   | not DE |
| EVM0022560 | LG1 | phosphoglucan phosphatase LS  | not DE   | not DE   | not DE   | not DE |
| EVM0002618 | LG1 | phospholipase A(1) DAD1, chl  | not DE   | not DE   | not DE   | not DE |
| EVM0016979 | LG1 | phospholipase A(1) DAD1, chl  | not DE   | not DE   | not DE   | not DE |
| EVM0018312 | LG1 | phospholipase A1-IIgamma-lik  | not DE   | not DE   | not DE   | not DE |
| EVM0020588 | LG1 | phosphomannomutase            | not DE   | not DE   | not DE   | not DE |
| EVM0012705 | LG1 | phosphoribulokinase, chlorop  | not DE   | not DE   | not DE   | not DE |
| EVM0016757 | LG1 | plasminogen activator inhibi  | not DE   | not DE   | not DE   | not DE |
| EVM0000035 | LG1 | plastidal glycolate/glycerat  | not DE   | not DE   | not DE   | not DE |
| EVM0009917 | LG1 | plastidal glycolate/glycerat  | not DE   | not DE   | not DE   | not DE |
| EVM0016944 | LG1 | pollen-specific leucine-rich  | not DE   | not DE   | not DE   | not DE |
| EVM0021566 | LG1 | poly                          | not DE   | not DE   | not DE   | not DE |
| EVM0023100 | LG1 | poly                          | not DE   | not DE   | not DE   | not DE |
| EVM0004304 | LG1 | polygalacturonase At1g48100-  | not DE   | not DE   | not DE   | not DE |
| EVM0019630 | LG1 | polygalacturonase At1g48100-  | not DE   | not DE   | not DE   | not DE |
| EVM0021575 | LG1 | polygalacturonase At1g48100-  | not DE   | not DE   | not DE   | not DE |
| EVM0021184 | LG1 | polygalacturonase inhibitor   | not DE   | not DE   | not DE   | not DE |
| EVM0006594 | LG1 | polygalacturonase-like        | not DE   | not DE   | not DE   | not DE |
| EVM0010383 | LG1 | polygalacturonase-like        | not DE   | not DE   | not DE   | not DE |
| EVM0022420 | LG1 | polygalacturonase-like        | not DE   | not DE   | not DE   | not DE |
| EVM0024127 | LG1 | potassium transporter 8-like  | not DE   | not DE   | not DE   | not DE |
| EVM0008144 | LG1 | pre-mRNA-splicing factor 18   | not DE   | not DE   | not DE   | not DE |
| EVM0008526 | LG1 | probable ATP-dependent DNA h  | not DE   | not DE   | not DE   | not DE |
| EVM0000959 | LG1 | probable ATP-dependent RNA h  | not DE   | not DE   | not DE   | not DE |
| EVM0021602 | LG1 | probable F-box protein At3g6  | not DE   | not DE   | not DE   | not DE |
| EVM0001580 | LG1 | probable LRR receptor-like s  | not DE   | not DE   | not DE   | not DE |
| EVM0005353 | LG1 | probable WRKY transcription   | not DE   | not DE   | not DE   | not DE |
| EVM0004822 | LG1 | probable WRKY transcription   | not DE   | not DE   | not DE   | not DE |
| EVM0019044 | LG1 | probable WRKY transcription   | not DE   | not DE   | not DE   | not DE |
| EVM0011829 | LG1 | probable beta-1,4-xylosyltra  | not DE   | not DE   | not DE   | not DE |
| EVM0022372 | LG1 | probable calcium-binding pro  | not DE   | not DE   | not DE   | not DE |

|            |     |                              |          |          |         |         |
|------------|-----|------------------------------|----------|----------|---------|---------|
| EVM0020358 | LG1 | probable carboxylesterase 8  | not DE   | not DE   | not DE  | not DE  |
| EVM0012402 | LG1 | probable dimethyladenosine t | not DE   | not DE   | not DE  | not DE  |
| EVM0000915 | LG1 | probable fructokinase-7 isof | not DE   | not DE   | not DE  | not DE  |
| EVM0008342 | LG1 | probable glutamyl endopeptid | not DE   | not DE   | not DE  | not DE  |
| EVM0022620 | LG1 | probable glutathione S-trans | not DE   | not DE   | not DE  | not DE  |
| EVM0015138 | LG1 | probable inactive purple aci | not DE   | not DE   | not DE  | not DE  |
| EVM0021930 | LG1 | probable inactive purple aci | not DE   | not DE   | not DE  | not DE  |
| EVM0000920 | LG1 | probable indole-3-acetic aci | not DE   | not DE   | not DE  | not DE  |
| EVM0008864 | LG1 | probable indole-3-acetic aci | not DE   | not DE   | not DE  | not DE  |
| EVM0023208 | LG1 | probable lipid-A-disaccharid | not DE   | not DE   | not DE  | not DE  |
| EVM0001383 | LG1 | probable methyltransferase P | not DE   | not DE   | not DE  | not DE  |
| EVM0009540 | LG1 | probable pectinesterase 53-l | not DE   | not DE   | not DE  | not DE  |
| EVM0015624 | LG1 | probable pectinesterase/pect | not DE   | not DE   | not DE  | not DE  |
| EVM0007077 | LG1 | probable pectinesterase/pect | not DE   | not DE   | not DE  | not DE  |
| EVM0014987 | LG1 | probable pectinesterase/pect | not DE   | not DE   | not DE  | not DE  |
| EVM0021313 | LG1 | probable plastid-lipid-assoc | not DE   | not DE   | not DE  | not DE  |
| EVM0013157 | LG1 | probable polyamine oxidase 2 | 1.728648 | 2.77E-06 | not DE  | not DE  |
| EVM0008226 | LG1 | probable polygalacturonase   | not DE   | not DE   | not DE  | not DE  |
| EVM0000538 | LG1 | probable protein phosphatase | not DE   | not DE   | not DE  | not DE  |
| EVM0021663 | LG1 | probable protein phosphatase | not DE   | not DE   | not DE  | not DE  |
| EVM0006370 | LG1 | probable purine permease 11  | not DE   | not DE   | not DE  | not DE  |
| EVM0010111 | LG1 | probable receptor-like prote | not DE   | not DE   | not DE  | not DE  |
| EVM0003895 | LG1 | probable sarcosine oxidase-l | not DE   | not DE   | not DE  | not DE  |
| EVM0020330 | LG1 | probable serine/threonine-pr | not DE   | not DE   | not DE  | not DE  |
| EVM0011417 | LG1 | probable sugar phosphate/pho | not DE   | not DE   | not DE  | not DE  |
| EVM0014435 | LG1 | probable terpene synthase 11 | not DE   | not DE   | not DE  | not DE  |
| EVM0005365 | LG1 | probable terpene synthase 12 | not DE   | not DE   | not DE  | not DE  |
| EVM0008827 | LG1 | probable terpene synthase 9- | not DE   | not DE   | not DE  | not DE  |
| EVM0012907 | LG1 | probable tyrosine--tRNA liga | not DE   | not DE   | not DE  | not DE  |
| EVM0017576 | LG1 | probable xyloglucan endotran | 4.188391 | 0.038288 | not DE  | not DE  |
| EVM0018682 | LG1 | probable zinc transporter pr | not DE   | not DE   | not DE  | not DE  |
| EVM0001797 | LG1 | prohibitin-3, mitochondrial- | not DE   | not DE   | not DE  | not DE  |
| EVM0002630 | LG1 | proliferating cell nuclear a | not DE   | not DE   | not DE  | not DE  |
| EVM0021397 | LG1 | proliferating cell nuclear a | not DE   | not DE   | not DE  | not DE  |
| EVM0002261 | LG1 | proline-rich protein 1-like  | not DE   | not DE   | not DE  | not DE  |
| EVM0015895 | LG1 | proline-rich protein 3-like  | not DE   | not DE   | not DE  | not DE  |
| EVM0009737 | LG1 | proline-rich protein HaeIII  | not DE   | not DE   | not DE  | not DE  |
| EVM0013340 | LG1 | proline-rich receptor-like p | not DE   | not DE   | not DE  | not DE  |
| EVM0002170 | LG1 | protease Do-like 1, chloropl | -2.85547 | 0.000176 | not DE  | not DE  |
| EVM0004474 | LG1 | protease Do-like 1, chloropl | not DE   | not DE   | 2.23478 | 0.00221 |
| EVM0016633 | LG1 | protease Do-like 9-like      | not DE   | not DE   | not DE  | not DE  |
| EVM0013974 | LG1 | protein CCC1-like            | not DE   | not DE   | not DE  | not DE  |
| EVM0021937 | LG1 | protein CCC1-like            | not DE   | not DE   | not DE  | not DE  |
| EVM0023219 | LG1 | protein CURVATURE THYLAKOID  | not DE   | not DE   | not DE  | not DE  |
| EVM0017929 | LG1 | protein DEK-like isoform X1  | not DE   | not DE   | not DE  | not DE  |
| EVM0002323 | LG1 | protein ECERIFERUM 1-like    | not DE   | not DE   | not DE  | not DE  |
| EVM0010946 | LG1 | protein ECERIFERUM 1-like    | not DE   | not DE   | not DE  | not DE  |
| EVM0012761 | LG1 | protein ECERIFERUM 1-like    | not DE   | not DE   | not DE  | not DE  |
| EVM0015015 | LG1 | protein ECERIFERUM 1-like    | not DE   | not DE   | not DE  | not DE  |
| EVM0020881 | LG1 | protein ECERIFERUM 1-like    | not DE   | not DE   | not DE  | not DE  |
| EVM0013152 | LG1 | protein ECERIFERUM 1-like is | not DE   | not DE   | not DE  | not DE  |
| EVM0004808 | LG1 | protein FAR1-RELATED SEQUENC | not DE   | not DE   | not DE  | not DE  |
| EVM0013873 | LG1 | protein FAR1-RELATED SEQUENC | not DE   | not DE   | not DE  | not DE  |
| EVM0023532 | LG1 | protein FAR1-RELATED SEQUENC | not DE   | not DE   | not DE  | not DE  |

|            |     |                               |          |          |          |         |
|------------|-----|-------------------------------|----------|----------|----------|---------|
| EVM0020100 | LG1 | protein GAMETE EXPRESSED 1    | not DE   | not DE   | not DE   | not DE  |
| EVM0007688 | LG1 | protein LOW PSII ACCUMULATIO  | not DE   | not DE   | not DE   | not DE  |
| EVM0002420 | LG1 | protein NIM1-INTERACTING 1    | not DE   | not DE   | not DE   | not DE  |
| EVM0002753 | LG1 | protein PAIR1                 | not DE   | not DE   | not DE   | not DE  |
| EVM0001192 | LG1 | protein PALE CRESS, chloropl  | not DE   | not DE   | not DE   | not DE  |
| EVM0005868 | LG1 | protein ROOT PRIMORDIUM DEFE  | 1.721256 | 3.44E-06 | not DE   | not DE  |
| EVM0016959 | LG1 | protein ROOT PRIMORDIUM DEFE  | not DE   | not DE   | not DE   | not DE  |
| EVM0009475 | LG1 | protein S-acyltransferase 18  | not DE   | not DE   | 3.057072 | 0.01288 |
| EVM0011393 | LG1 | protein STRUBBELIG-RECEPTOR   | not DE   | not DE   | not DE   | not DE  |
| EVM0000146 | LG1 | protein TRIGALACTOSYLDIACYLG  | not DE   | not DE   | -1.57238 | 0.0013  |
| EVM0001396 | LG1 | protein YLS7-like             | not DE   | not DE   | not DE   | not DE  |
| EVM0002929 | LG1 | protein arvl homolog isoform  | not DE   | not DE   | not DE   | not DE  |
| EVM0023342 | LG1 | protein cornichon homolog 4-  | not DE   | not DE   | not DE   | not DE  |
| EVM0021211 | LG1 | protein disulfide isomerase-  | not DE   | not DE   | not DE   | not DE  |
| EVM0002709 | LG1 | protein farnesyltransferase   | not DE   | not DE   | not DE   | not DE  |
| EVM0020494 | LG1 | protein farnesyltransferase   | not DE   | not DE   | not DE   | not DE  |
| EVM0003706 | LG1 | protein notum homolog         | not DE   | not DE   | not DE   | not DE  |
| EVM0006074 | LG1 | protein phosphatase 2C 29-li  | not DE   | not DE   | not DE   | not DE  |
| EVM0004768 | LG1 | protein phosphatase 2C 32-li  | not DE   | not DE   | not DE   | not DE  |
| EVM0001208 | LG1 | protein translocase subunit   | not DE   | not DE   | not DE   | not DE  |
| EVM0007016 | LG1 | protein transport protein SE  | not DE   | not DE   | -1.03163 | #####   |
| EVM0000317 | LG1 | protein transport protein Se  | not DE   | not DE   | not DE   | not DE  |
| EVM0006989 | LG1 | protein transport protein Se  | -1.64326 | 0.008758 | not DE   | not DE  |
| EVM0004416 | LG1 | protein trichome birefringen  | not DE   | not DE   | not DE   | not DE  |
| EVM0006376 | LG1 | protein trichome birefringen  | not DE   | not DE   | not DE   | not DE  |
| EVM0013676 | LG1 | protein-tyrosine-phosphatase  | not DE   | not DE   | not DE   | not DE  |
| EVM0022635 | LG1 | protodermal factor 1          | not DE   | not DE   | not DE   | not DE  |
| EVM0011627 | LG1 | putative DNA repair and reco  | not DE   | not DE   | not DE   | not DE  |
| EVM0022959 | LG1 | putative DNA-binding protein  | not DE   | not DE   | not DE   | not DE  |
| EVM0006492 | LG1 | putative DUF21 domain-contain | not DE   | not DE   | not DE   | not DE  |
| EVM0012795 | LG1 | putative ER lumen protein re  | not DE   | not DE   | not DE   | not DE  |
| EVM0007784 | LG1 | putative F-box/FBD/LRR-repea  | not DE   | not DE   | not DE   | not DE  |
| EVM0013163 | LG1 | putative UPF0481 protein At3  | not DE   | not DE   | not DE   | not DE  |
| EVM0008776 | LG1 | putative casein kinase II su  | not DE   | not DE   | not DE   | not DE  |
| EVM0005359 | LG1 | putative cytochrome c oxidas  | not DE   | not DE   | not DE   | not DE  |
| EVM0013858 | LG1 | putative dual specificity pr  | not DE   | not DE   | not DE   | not DE  |
| EVM0010439 | LG1 | putative germin-like protein  | not DE   | not DE   | not DE   | not DE  |
| EVM0016233 | LG1 | putative germin-like protein  | not DE   | not DE   | not DE   | not DE  |
| EVM0017174 | LG1 | putative glucose-6-phosphate  | not DE   | not DE   | not DE   | not DE  |
| EVM0019386 | LG1 | putative glucose-6-phosphate  | not DE   | not DE   | not DE   | not DE  |
| EVM0012912 | LG1 | putative kinase-like protein  | not DE   | not DE   | not DE   | not DE  |
| EVM0021512 | LG1 | putative nuclease HARBI1-lik  | not DE   | not DE   | not DE   | not DE  |
| EVM0002812 | LG1 | putative pectinesterase 63    | not DE   | not DE   | not DE   | not DE  |
| EVM0005383 | LG1 | putative pectinesterase 63    | not DE   | not DE   | not DE   | not DE  |
| EVM0023473 | LG1 | putative pentatricopeptide r  | not DE   | not DE   | not DE   | not DE  |
| EVM0004394 | LG1 | putative pentatricopeptide r  | not DE   | not DE   | not DE   | not DE  |
| EVM0015347 | LG1 | putative pentatricopeptide r  | 1.783059 | 0.016571 | not DE   | not DE  |
| EVM0021523 | LG1 | putative pentatricopeptide r  | 2.179792 | 0.003233 | not DE   | not DE  |
| EVM0020049 | LG1 | putative pentatricopeptide r  | not DE   | not DE   | not DE   | not DE  |
| EVM0012819 | LG1 | putative phospholipid-transp  | not DE   | not DE   | not DE   | not DE  |
| EVM0023811 | LG1 | putative phospholipid-transp  | not DE   | not DE   | not DE   | not DE  |
| EVM0003109 | LG1 | putative protein TPRXL        | not DE   | not DE   | not DE   | not DE  |
| EVM0012718 | LG1 | putative protein TPRXL-like   | not DE   | not DE   | not DE   | not DE  |
| EVM0007656 | LG1 | putative ribonuclease H prot  | not DE   | not DE   | not DE   | not DE  |

|            |     |                               |          |          |          |         |
|------------|-----|-------------------------------|----------|----------|----------|---------|
| EVM0021256 | LG1 | putative ribonuclease H prot  | not DE   | not DE   | not DE   | not DE  |
| EVM0004585 | LG1 | putative ripening-related pr  | not DE   | not DE   | not DE   | not DE  |
| EVM0021165 | LG1 | putative ripening-related pr  | not DE   | not DE   | not DE   | not DE  |
| EVM0022462 | LG1 | pyridoxine/pyridoxamine 5&ap  | not DE   | not DE   | not DE   | not DE  |
| EVM0019415 | LG1 | pyrophosphate--fructose 6-ph  | not DE   | not DE   | not DE   | not DE  |
| EVM0014893 | LG1 | pyruvate dehydrogenase E1 co  | not DE   | not DE   | not DE   | not DE  |
| EVM0009167 | LG1 | rac-like GTP-binding protein  | not DE   | not DE   | not DE   | not DE  |
| EVM0004224 | LG1 | rac-like GTP-binding protein  | not DE   | not DE   | not DE   | not DE  |
| EVM0017719 | LG1 | ras-related protein RABA1f-l  | not DE   | not DE   | not DE   | not DE  |
| EVM0015555 | LG1 | ras-related protein RABB1b    | not DE   | not DE   | 1.082601 | #####   |
| EVM0002452 | LG1 | ras-related protein RABD2a-l  | not DE   | not DE   | not DE   | not DE  |
| EVM0015742 | LG1 | ras-related protein RABH1b    | not DE   | not DE   | not DE   | not DE  |
| EVM0002115 | LG1 | ras-related protein RABH1b-l  | not DE   | not DE   | not DE   | not DE  |
| EVM0002238 | LG1 | ras-related protein Rab11D-l  | not DE   | not DE   | not DE   | not DE  |
| EVM0009882 | LG1 | receptor-like protein 12-lik  | not DE   | not DE   | not DE   | not DE  |
| EVM0011139 | LG1 | receptor-like serine/threonin | not DE   | not DE   | not DE   | not DE  |
| EVM0003526 | LG1 | regulator of nonsense transcr | not DE   | not DE   | not DE   | not DE  |
| EVM0016793 | LG1 | regulatory protein NPR3-like  | not DE   | not DE   | not DE   | not DE  |
| EVM0011840 | LG1 | respiratory burst oxidase ho  | not DE   | not DE   | -1.65388 | 0.01208 |
| EVM0022232 | LG1 | respiratory burst oxidase ho  | not DE   | not DE   | not DE   | not DE  |
| EVM0021614 | LG1 | rho GTPase-activating protei  | not DE   | not DE   | not DE   | not DE  |
| EVM0009981 | LG1 | riboflavin synthase           | not DE   | not DE   | not DE   | not DE  |
| EVM0000373 | LG1 | riboflavin synthase-like isc  | not DE   | not DE   | not DE   | not DE  |
| EVM0006353 | LG1 | ribonuclease 2                | not DE   | not DE   | not DE   | not DE  |
| EVM0023106 | LG1 | ribonuclease E/G-like protei  | not DE   | not DE   | not DE   | not DE  |
| EVM0006322 | LG1 | ribonuclease P protein subun  | not DE   | not DE   | not DE   | not DE  |
| EVM0006164 | LG1 | ribose-phosphate pyrophospho  | not DE   | not DE   | not DE   | not DE  |
| EVM0013414 | LG1 | secretory carrier-associated  | not DE   | not DE   | not DE   | not DE  |
| EVM0007971 | LG1 | seed biotin-containing prote  | 9.701641 | 0.000111 | not DE   | not DE  |
| EVM0023646 | LG1 | selenocysteine methyltransfe  | not DE   | not DE   | not DE   | not DE  |
| EVM0011970 | LG1 | senescence-specific cysteine  | not DE   | not DE   | not DE   | not DE  |
| EVM0003269 | LG1 | serine/threonine protein pho  | not DE   | not DE   | not DE   | not DE  |
| EVM0007080 | LG1 | serine/threonine-protein kin  | not DE   | not DE   | not DE   | not DE  |
| EVM0017034 | LG1 | serine/threonine-protein kin  | not DE   | not DE   | not DE   | not DE  |
| EVM0012987 | LG1 | serine/threonine-protein kin  | not DE   | not DE   | not DE   | not DE  |
| EVM0002449 | LG1 | serine/threonine-protein kin  | not DE   | not DE   | not DE   | not DE  |
| EVM0000699 | LG1 | serine/threonine-protein kin  | not DE   | not DE   | not DE   | not DE  |
| EVM0015207 | LG1 | serine/threonine-protein kin  | not DE   | not DE   | -1.07128 | #####   |
| EVM0011075 | LG1 | serine/threonine-protein pho  | not DE   | not DE   | not DE   | not DE  |
| EVM0003324 | LG1 | shaggy-related protein kinas  | not DE   | not DE   | not DE   | not DE  |
| EVM0022818 | LG1 | shaggy-related protein kinas  | not DE   | not DE   | not DE   | not DE  |
| EVM0007443 | LG1 | short-chain dehydrogenase re  | not DE   | not DE   | not DE   | not DE  |
| EVM0011285 | LG1 | short-chain dehydrogenase re  | not DE   | not DE   | not DE   | not DE  |
| EVM0005200 | LG1 | small nuclear ribonucleoprot  | not DE   | not DE   | not DE   | not DE  |
| EVM0000413 | LG1 | small nuclear ribonucleoprot  | not DE   | not DE   | 1.255962 | #####   |
| EVM0007659 | LG1 | small ubiquitin-related modi  | not DE   | not DE   | not DE   | not DE  |
| EVM0021324 | LG1 | small ubiquitin-related modi  | not DE   | not DE   | not DE   | not DE  |
| EVM0022340 | LG1 | soluble inorganic pyrophosph  | not DE   | not DE   | not DE   | not DE  |
| EVM0002568 | LG1 | spermatogenesis-associated p  | not DE   | not DE   | not DE   | not DE  |
| EVM0009727 | LG1 | squamosa promoter-binding-li  | not DE   | not DE   | not DE   | not DE  |
| EVM0010036 | LG1 | sterol 3-beta-glucosyltransf  | not DE   | not DE   | not DE   | not DE  |
| EVM0023176 | LG1 | stress-related protein        | not DE   | not DE   | 1.541665 | 0.04106 |
| EVM0008602 | LG1 | structural maintenance of ch  | not DE   | not DE   | not DE   | not DE  |
| EVM0016924 | LG1 | subtilisin-like protease-lik  | not DE   | not DE   | not DE   | not DE  |

|            |     |                               |          |          |          |         |
|------------|-----|-------------------------------|----------|----------|----------|---------|
| EVM0017795 | LG1 | subtilisin-like protease-like | -1.79039 | 0.031985 | not DE   | not DE  |
| EVM0001047 | LG1 | syntaxin-22-like              |          |          | not DE   | not DE  |
| EVM0011232 | LG1 | tRNA (guanine-N(7)-)-methylt  |          |          | not DE   | not DE  |
| EVM0011256 | LG1 | tRNA 2'&apos;-phosphotransfer |          |          | not DE   | not DE  |
| EVM0014561 | LG1 | tRNA wybutosine-synthesizing  |          |          | not DE   | not DE  |
| EVM0012232 | LG1 | tRNA:m(4)X modification enzym |          |          | not DE   | not DE  |
| EVM0010465 | LG1 | testis-expressed sequence 11  |          |          | not DE   | not DE  |
| EVM0010388 | LG1 | threonine--tRNA ligase, mito  |          |          | not DE   | not DE  |
| EVM0020665 | LG1 | tobamovirus multiplication p  |          |          | not DE   | not DE  |
| EVM0017038 | LG1 | tobamovirus multiplication p  |          |          | 2.172762 | 0.00015 |
| EVM0017434 | LG1 | trans-resveratrol di-O-methy  |          |          | not DE   | not DE  |
| EVM0004265 | LG1 | trans-resveratrol di-O-methy  |          |          | not DE   | not DE  |
| EVM0011989 | LG1 | trans-resveratrol di-O-methy  |          |          | not DE   | not DE  |
| EVM0012857 | LG1 | trans-resveratrol di-O-methy  |          |          | not DE   | not DE  |
| EVM0020805 | LG1 | transcription factor CPC-like |          |          | not DE   | not DE  |
| EVM0014326 | LG1 | transcription factor GTE4-li  |          |          | not DE   | not DE  |
| EVM0020901 | LG1 | transcription factor PAR1-li  |          |          | not DE   | not DE  |
| EVM0000626 | LG1 | transcription factor PIF3-li  | 1.633631 | 1.83E-05 | not DE   | not DE  |
| EVM0010780 | LG1 | transcription factor RF2a-li  |          |          | not DE   | not DE  |
| EVM0008563 | LG1 | transcription factor WER-like |          |          | not DE   | not DE  |
| EVM0011983 | LG1 | transcription factor WER-like |          |          | not DE   | not DE  |
| EVM0012758 | LG1 | transcription factor bHLH69-  |          |          | not DE   | not DE  |
| EVM0015899 | LG1 | transcription factor bHLH71-  |          |          | not DE   | not DE  |
| EVM0008923 | LG1 | transcription factor bHLH91-  |          |          | not DE   | not DE  |
| EVM0010506 | LG1 | transcriptional adapter ADA2  |          |          | not DE   | not DE  |
| EVM0015832 | LG1 | transcriptional adapter ADA2  |          |          | not DE   | not DE  |
| EVM0023705 | LG1 | translation factor GUF1 hom   |          |          | not DE   | not DE  |
| EVM0009113 | LG1 | transmembrane emp24 domain-c  |          |          | not DE   | not DE  |
| EVM0024508 | LG1 | transmembrane protein 41 hom  | -2.24268 | 0.046286 | not DE   | not DE  |
| EVM0012412 | LG1 | transportin-3-like isoform X  |          |          | not DE   | not DE  |
| EVM0012600 | LG1 | two-component response regul  |          |          | not DE   | not DE  |
| EVM0011384 | LG1 | two-component response regul  |          |          | not DE   | not DE  |
| EVM0015535 | LG1 | two-component response regul  | 2.084421 | 2.17E-05 | 1.003094 | 0.02687 |
| EVM0020896 | LG1 | two-pore potassium channel 5  |          |          | not DE   | not DE  |
| EVM0011722 | LG1 | type I inositol 1,4,5-trisph  |          |          | not DE   | not DE  |
| EVM0018245 | LG1 | type I inositol 1,4,5-trisph  |          |          | not DE   | not DE  |
| EVM0006895 | LG1 | tyrosine decarboxylase 1-lik  |          |          | not DE   | not DE  |
| EVM0024364 | LG1 | ubiquinol oxidase 2, mitocho  |          |          | not DE   | not DE  |
| EVM0023278 | LG1 | ubiquitin-40S ribosomal prot  |          |          | not DE   | not DE  |
| EVM0001892 | LG1 | ubiquitin-conjugating enzyme  |          |          | not DE   | not DE  |
| EVM0007324 | LG1 | ubiquitin-conjugating enzyme  |          |          | not DE   | not DE  |
| EVM0021854 | LG1 | ubiquitin-conjugating enzyme  |          |          | not DE   | not DE  |
| EVM0006991 | LG1 | ubiquitin-conjugating enzyme  |          |          | not DE   | not DE  |
| EVM0019893 | LG1 | ubiquitin-related modifier 1  |          |          | not DE   | not DE  |
| EVM0017733 | LG1 | uncharacterized CRM domain-c  |          |          | not DE   | not DE  |
| EVM0020354 | LG1 | uncharacterized GPI-anchored  |          |          | not DE   | not DE  |
| EVM0014991 | LG1 | uncharacterized LOC100306376  |          |          | not DE   | not DE  |
| EVM0023934 | LG1 | uncharacterized membrane pro  | 1.08795  | 0.001951 | not DE   | not DE  |
| EVM0000938 | LG1 | uncharacterized protein At1g  |          |          | not DE   | not DE  |
| EVM0020477 | LG1 | uncharacterized protein At5g  | 1.894981 | 0.010308 | not DE   | not DE  |
| EVM0021082 | LG1 | uncharacterized protein At5g  |          |          | not DE   | not DE  |
| EVM0006796 | LG1 | uncharacterized protein At5g  |          |          | not DE   | not DE  |
| EVM0018626 | LG1 | uncharacterized protein C4or  | -1.52866 | 0.003707 | not DE   | not DE  |
| EVM0016931 | LG1 | uncharacterized protein LOC1  |          |          | not DE   | not DE  |

|            |     |                              |          |          |          |         |
|------------|-----|------------------------------|----------|----------|----------|---------|
| EVM0016012 | LG1 | uncharacterized protein LOC1 | not DE   | not DE   | not DE   | not DE  |
| EVM0021415 | LG1 | uncharacterized protein LOC1 | not DE   | not DE   | not DE   | not DE  |
| EVM0018326 | LG1 | uncharacterized protein LOC1 | not DE   | not DE   | not DE   | not DE  |
| EVM0011718 | LG1 | uncharacterized protein LOC1 | not DE   | not DE   | 1.549411 | #####   |
| EVM0003866 | LG1 | uncharacterized protein LOC1 | not DE   | not DE   | -1.71843 | 0.00522 |
| EVM0010206 | LG1 | uncharacterized protein LOC1 | not DE   | not DE   | not DE   | not DE  |
| EVM0010619 | LG1 | uncharacterized protein LOC1 | not DE   | not DE   | not DE   | not DE  |
| EVM0004131 | LG1 | uncharacterized protein LOC1 | not DE   | not DE   | not DE   | not DE  |
| EVM0015627 | LG1 | uncharacterized protein LOC1 | not DE   | not DE   | not DE   | not DE  |
| EVM0018724 | LG1 | uncharacterized protein LOC1 | not DE   | not DE   | not DE   | not DE  |
| EVM0005864 | LG1 | uncharacterized protein LOC1 | 1.01621  | 0.018482 | not DE   | not DE  |
| EVM0014276 | LG1 | uncharacterized protein LOC1 | not DE   | not DE   | not DE   | not DE  |
| EVM0022993 | LG1 | uncharacterized protein LOC1 | -1.49407 | 0.001831 | not DE   | not DE  |
| EVM0018632 | LG1 | uncharacterized protein LOC1 | not DE   | not DE   | not DE   | not DE  |
| EVM0018186 | LG1 | uncharacterized protein LOC1 | not DE   | not DE   | not DE   | not DE  |
| EVM0020890 | LG1 | uncharacterized protein LOC1 | not DE   | not DE   | not DE   | not DE  |
| EVM0019624 | LG1 | uncharacterized protein LOC1 | not DE   | not DE   | not DE   | not DE  |
| EVM0019477 | LG1 | uncharacterized protein LOC1 | not DE   | not DE   | not DE   | not DE  |
| EVM0012259 | LG1 | uncharacterized protein LOC1 | not DE   | not DE   | not DE   | not DE  |
| EVM0003605 | LG1 | uncharacterized protein LOC1 | not DE   | not DE   | not DE   | not DE  |
| EVM0003645 | LG1 | uncharacterized protein LOC1 | not DE   | not DE   | not DE   | not DE  |
| EVM0021789 | LG1 | uncharacterized protein LOC1 | not DE   | not DE   | not DE   | not DE  |
| EVM0023928 | LG1 | uncharacterized protein LOC1 | not DE   | not DE   | not DE   | not DE  |
| EVM0002556 | LG1 | uncharacterized protein LOC1 | not DE   | not DE   | not DE   | not DE  |
| EVM0003933 | LG1 | uncharacterized protein LOC1 | not DE   | not DE   | not DE   | not DE  |
| EVM0023692 | LG1 | uncharacterized protein LOC1 | not DE   | not DE   | not DE   | not DE  |
| EVM0013059 | LG1 | uncharacterized protein LOC1 | not DE   | not DE   | not DE   | not DE  |
| EVM0012809 | LG1 | uncharacterized protein LOC1 | not DE   | not DE   | not DE   | not DE  |
| EVM0024416 | LG1 | uncharacterized protein LOC1 | not DE   | not DE   | not DE   | not DE  |
| EVM0018789 | LG1 | uncharacterized protein LOC1 | not DE   | not DE   | not DE   | not DE  |
| EVM0000446 | LG1 | uncharacterized protein LOC1 | not DE   | not DE   | not DE   | not DE  |
| EVM0020524 | LG1 | uncharacterized protein LOC1 | not DE   | not DE   | 1.74587  | 0.00081 |
| EVM0000677 | LG1 | uncharacterized protein LOC1 | not DE   | not DE   | not DE   | not DE  |
| EVM0021571 | LG1 | uncharacterized protein LOC1 | not DE   | not DE   | not DE   | not DE  |
| EVM0003542 | LG1 | uncharacterized protein LOC1 | not DE   | not DE   | -1.02598 | 0.01661 |
| EVM0011898 | LG1 | uncharacterized protein LOC1 | not DE   | not DE   | not DE   | not DE  |
| EVM0017036 | LG1 | uncharacterized protein LOC1 | not DE   | not DE   | not DE   | not DE  |
| EVM0005620 | LG1 | uncharacterized protein LOC1 | 1.011627 | 0.049026 | not DE   | not DE  |
| EVM0023942 | LG1 | uncharacterized protein LOC1 | not DE   | not DE   | not DE   | not DE  |
| EVM0022582 | LG1 | uncharacterized protein LOC1 | not DE   | not DE   | not DE   | not DE  |
| EVM0004157 | LG1 | uncharacterized protein LOC1 | not DE   | not DE   | not DE   | not DE  |
| EVM0005887 | LG1 | uncharacterized protein LOC1 | not DE   | not DE   | not DE   | not DE  |
| EVM0009888 | LG1 | uncharacterized protein LOC1 | not DE   | not DE   | not DE   | not DE  |
| EVM0020657 | LG1 | uncharacterized protein LOC1 | not DE   | not DE   | not DE   | not DE  |
| EVM0016551 | LG1 | uncharacterized protein LOC1 | not DE   | not DE   | -1.64195 | #####   |
| EVM0008592 | LG1 | uncharacterized protein LOC1 | not DE   | not DE   | not DE   | not DE  |
| EVM0017966 | LG1 | uncharacterized protein LOC1 | 1.048238 | 0.000731 | not DE   | not DE  |
| EVM0017109 | LG1 | uncharacterized protein LOC1 | not DE   | not DE   | not DE   | not DE  |
| EVM0011646 | LG1 | uncharacterized protein LOC1 | not DE   | not DE   | not DE   | not DE  |
| EVM0003873 | LG1 | uncharacterized protein LOC1 | not DE   | not DE   | not DE   | not DE  |
| EVM0001268 | LG1 | uncharacterized protein LOC1 | not DE   | not DE   | not DE   | not DE  |
| EVM0013036 | LG1 | uncharacterized protein LOC1 | not DE   | not DE   | not DE   | not DE  |
| EVM0019615 | LG1 | uncharacterized protein LOC1 | not DE   | not DE   | not DE   | not DE  |
| EVM0020155 | LG1 | uncharacterized protein LOC1 | not DE   | not DE   | not DE   | not DE  |

|            |     |                              |          |          |          |         |
|------------|-----|------------------------------|----------|----------|----------|---------|
| EVM0022499 | LG1 | uncharacterized protein LOC1 | not DE   | not DE   | not DE   | not DE  |
| EVM0019848 | LG1 | uncharacterized protein LOC1 | not DE   | not DE   | not DE   | not DE  |
| EVM0001543 | LG1 | uncharacterized protein LOC1 | not DE   | not DE   | not DE   | not DE  |
| EVM0005963 | LG1 | uncharacterized protein LOC1 | not DE   | not DE   | not DE   | not DE  |
| EVM0017757 | LG1 | uncharacterized protein LOC1 | 1.486266 | 0.000811 | not DE   | not DE  |
| EVM0022292 | LG1 | uncharacterized protein LOC1 | not DE   | not DE   | not DE   | not DE  |
| EVM0006867 | LG1 | uncharacterized protein LOC1 | not DE   | not DE   | not DE   | not DE  |
| EVM0021336 | LG1 | uncharacterized protein LOC1 | not DE   | not DE   | not DE   | not DE  |
| EVM0004794 | LG1 | uncharacterized protein LOC1 | not DE   | not DE   | not DE   | not DE  |
| EVM0002473 | LG1 | uncharacterized protein LOC1 | not DE   | not DE   | not DE   | not DE  |
| EVM0003707 | LG1 | uncharacterized protein LOC1 | not DE   | not DE   | not DE   | not DE  |
| EVM0023061 | LG1 | uncharacterized protein LOC1 | not DE   | not DE   | not DE   | not DE  |
| EVM0017295 | LG1 | uncharacterized protein LOC1 | not DE   | not DE   | not DE   | not DE  |
| EVM0016991 | LG1 | uncharacterized protein LOC1 | not DE   | not DE   | not DE   | not DE  |
| EVM0021419 | LG1 | uncharacterized protein LOC1 | not DE   | not DE   | not DE   | not DE  |
| EVM0000507 | LG1 | uncharacterized protein LOC1 | -3.74163 | 0.036709 | not DE   | not DE  |
| EVM0024474 | LG1 | uncharacterized protein LOC1 | not DE   | not DE   | not DE   | not DE  |
| EVM0023443 | LG1 | uncharacterized protein LOC1 | not DE   | not DE   | not DE   | not DE  |
| EVM0002026 | LG1 | uncharacterized protein LOC1 | not DE   | not DE   | not DE   | not DE  |
| EVM0019019 | LG1 | uncharacterized protein LOC1 | not DE   | not DE   | -1.13014 | 0.00387 |
| EVM0019783 | LG1 | uncharacterized protein LOC1 | not DE   | not DE   | not DE   | not DE  |
| EVM0010311 | LG1 | uncharacterized protein LOC1 | not DE   | not DE   | not DE   | not DE  |
| EVM0018296 | LG1 | uncharacterized protein LOC1 | not DE   | not DE   | not DE   | not DE  |
| EVM0010339 | LG1 | uncharacterized protein LOC1 | not DE   | not DE   | not DE   | not DE  |
| EVM0006960 | LG1 | uncharacterized protein LOC1 | not DE   | not DE   | 1.121095 | 0.01978 |
| EVM0002783 | LG1 | uncharacterized protein LOC1 | not DE   | not DE   | not DE   | not DE  |
| EVM0016336 | LG1 | uncharacterized protein LOC1 | not DE   | not DE   | not DE   | not DE  |
| EVM0021958 | LG1 | uncharacterized protein LOC1 | not DE   | not DE   | not DE   | not DE  |
| EVM0000310 | LG1 | uncharacterized protein LOC1 | not DE   | not DE   | not DE   | not DE  |
| EVM0007423 | LG1 | uncharacterized protein LOC1 | 1.297923 | 0.005408 | not DE   | not DE  |
| EVM0015432 | LG1 | uncharacterized protein LOC1 | not DE   | not DE   | not DE   | not DE  |
| EVM0019199 | LG1 | uncharacterized protein LOC1 | not DE   | not DE   | not DE   | not DE  |
| EVM0023202 | LG1 | uncharacterized protein LOC1 | not DE   | not DE   | not DE   | not DE  |
| EVM0013415 | LG1 | uncharacterized protein LOC1 | not DE   | not DE   | not DE   | not DE  |
| EVM0011757 | LG1 | uncharacterized protein LOC1 | not DE   | not DE   | -1.13085 | 0.00979 |
| EVM0024118 | LG1 | uncharacterized protein LOC1 | not DE   | not DE   | not DE   | not DE  |
| EVM0009954 | LG1 | uncharacterized protein LOC1 | 2.03727  | 1.25E-06 | -1.62717 | 0.00036 |
| EVM0012386 | LG1 | uncharacterized protein LOC1 | not DE   | not DE   | not DE   | not DE  |
| EVM0003454 | LG1 | uncharacterized protein LOC1 | not DE   | not DE   | not DE   | not DE  |
| EVM0009789 | LG1 | uncharacterized protein LOC1 | not DE   | not DE   | not DE   | not DE  |
| EVM0009683 | LG1 | uncharacterized protein LOC1 | not DE   | not DE   | not DE   | not DE  |
| EVM0003230 | LG1 | uncharacterized protein LOC1 | not DE   | not DE   | not DE   | not DE  |
| EVM0006541 | LG1 | uncharacterized protein LOC1 | not DE   | not DE   | not DE   | not DE  |
| EVM0006531 | LG1 | uncharacterized protein LOC1 | not DE   | not DE   | 1.284015 | 0.00012 |
| EVM0023681 | LG1 | uncharacterized protein LOC1 | not DE   | not DE   | not DE   | not DE  |
| EVM0003260 | LG1 | uncharacterized protein LOC1 | 1.926529 | 0.036123 | not DE   | not DE  |
| EVM0009807 | LG1 | uncharacterized protein LOC1 | not DE   | not DE   | -1.03036 | 0.02363 |
| EVM0016157 | LG1 | uncharacterized protein LOC1 | not DE   | not DE   | not DE   | not DE  |
| EVM0024001 | LG1 | uncharacterized protein LOC1 | not DE   | not DE   | not DE   | not DE  |
| EVM0008470 | LG1 | uncharacterized protein LOC1 | not DE   | not DE   | not DE   | not DE  |
| EVM0013168 | LG1 | uncharacterized protein LOC1 | not DE   | not DE   | not DE   | not DE  |
| EVM0003316 | LG1 | uncharacterized protein LOC1 | not DE   | not DE   | not DE   | not DE  |
| EVM0000207 | LG1 | uncharacterized protein LOC1 | not DE   | not DE   | not DE   | not DE  |
| EVM0003443 | LG1 | uncharacterized protein LOC1 | not DE   | not DE   | not DE   | not DE  |

|            |     |                              |          |          |          |        |
|------------|-----|------------------------------|----------|----------|----------|--------|
| EVM0010063 | LG1 | uncharacterized protein LOC1 | not DE   | not DE   | not DE   | not DE |
| EVM0005227 | LG1 | uncharacterized protein LOC1 | not DE   | not DE   | not DE   | not DE |
| EVM0019843 | LG1 | uncharacterized protein LOC1 | not DE   | not DE   | not DE   | not DE |
| EVM0000014 | LG1 | uncharacterized protein LOC1 | not DE   | not DE   | not DE   | not DE |
| EVM0002893 | LG1 | uncharacterized protein LOC1 | not DE   | not DE   | not DE   | not DE |
| EVM0023940 | LG1 | uncharacterized protein LOC1 | not DE   | not DE   | not DE   | not DE |
| EVM0005618 | LG1 | uncharacterized protein LOC1 | not DE   | not DE   | not DE   | not DE |
| EVM0008312 | LG1 | uncharacterized protein LOC1 | not DE   | not DE   | not DE   | not DE |
| EVM0010039 | LG1 | uncharacterized protein LOC1 | not DE   | not DE   | not DE   | not DE |
| EVM0003351 | LG1 | uncharacterized protein LOC1 | not DE   | not DE   | not DE   | not DE |
| EVM0023162 | LG1 | uncharacterized protein LOC1 | not DE   | not DE   | not DE   | not DE |
| EVM0024669 | LG1 | uncharacterized protein LOC1 | not DE   | not DE   | not DE   | not DE |
| EVM0008863 | LG1 | uncharacterized protein LOC1 | not DE   | not DE   | not DE   | not DE |
| EVM0020787 | LG1 | uncharacterized protein LOC1 | not DE   | not DE   | not DE   | not DE |
| EVM0023777 | LG1 | uncharacterized protein LOC1 | not DE   | not DE   | not DE   | not DE |
| EVM0017855 | LG1 | uncharacterized protein LOC1 | not DE   | not DE   | -1.11496 | #####  |
| EVM0010616 | LG1 | uncharacterized protein LOC1 | -1.97142 | 0.022662 | not DE   | not DE |
| EVM0024455 | LG1 | uncharacterized protein LOC1 | not DE   | not DE   | not DE   | not DE |
| EVM0020597 | LG1 | uncharacterized protein LOC1 | not DE   | not DE   | not DE   | not DE |
| EVM0019705 | LG1 | uncharacterized protein LOC1 | not DE   | not DE   | not DE   | not DE |
| EVM0020625 | LG1 | uncharacterized protein LOC1 | not DE   | not DE   | not DE   | not DE |
| EVM0023670 | LG1 | uncharacterized protein LOC1 | not DE   | not DE   | not DE   | not DE |
| EVM0021091 | LG1 | uncharacterized protein LOC1 | not DE   | not DE   | not DE   | not DE |
| EVM0006086 | LG1 | uncharacterized protein LOC1 | not DE   | not DE   | not DE   | not DE |
| EVM0012435 | LG1 | uncharacterized protein LOC1 | not DE   | not DE   | not DE   | not DE |
| EVM0004056 | LG1 | uncharacterized protein LOC1 | not DE   | not DE   | not DE   | not DE |
| EVM0018637 | LG1 | uncharacterized protein LOC1 | not DE   | not DE   | -1.59358 | #####  |
| EVM0024427 | LG1 | uncharacterized protein LOC1 | not DE   | not DE   | not DE   | not DE |
| EVM0012211 | LG1 | uncharacterized protein LOC1 | -2.56395 | 7.14E-07 | not DE   | not DE |
| EVM0016177 | LG1 | uncharacterized protein LOC1 | not DE   | not DE   | not DE   | not DE |
| EVM0018747 | LG1 | uncharacterized protein LOC1 | not DE   | not DE   | not DE   | not DE |
| EVM0019387 | LG1 | uncharacterized protein LOC1 | not DE   | not DE   | not DE   | not DE |
| EVM0019510 | LG1 | uncharacterized protein LOC1 | not DE   | not DE   | not DE   | not DE |
| EVM0016877 | LG1 | uncharacterized protein LOC1 | not DE   | not DE   | not DE   | not DE |
| EVM0001116 | LG1 | uncharacterized protein LOC1 | not DE   | not DE   | not DE   | not DE |
| EVM0023951 | LG1 | uncharacterized protein LOC1 | not DE   | not DE   | not DE   | not DE |
| EVM0009273 | LG1 | uncharacterized protein LOC1 | not DE   | not DE   | not DE   | not DE |
| EVM0002202 | LG1 | uncharacterized protein LOC1 | not DE   | not DE   | not DE   | not DE |
| EVM0020980 | LG1 | uncharacterized protein LOC1 | not DE   | not DE   | not DE   | not DE |
| EVM0000108 | LG1 | uncharacterized protein LOC1 | not DE   | not DE   | not DE   | not DE |
| EVM0002914 | LG1 | uncharacterized protein LOC1 | not DE   | not DE   | not DE   | not DE |
| EVM0001441 | LG1 | uncharacterized protein LOC1 | not DE   | not DE   | 1.316364 | #####  |
| EVM0007924 | LG1 | uncharacterized protein LOC1 | not DE   | not DE   | not DE   | not DE |
| EVM0017285 | LG1 | uncharacterized protein LOC1 | not DE   | not DE   | not DE   | not DE |
| EVM0000746 | LG1 | uncharacterized protein LOC1 | not DE   | not DE   | not DE   | not DE |
| EVM0008275 | LG1 | uncharacterized protein LOC1 | not DE   | not DE   | not DE   | not DE |
| EVM0014945 | LG1 | uncharacterized protein LOC1 | not DE   | not DE   | not DE   | not DE |
| EVM0003628 | LG1 | uncharacterized protein LOC1 | not DE   | not DE   | not DE   | not DE |
| EVM0022133 | LG1 | uncharacterized protein LOC1 | not DE   | not DE   | not DE   | not DE |
| EVM0022285 | LG1 | uncharacterized protein LOC1 | not DE   | not DE   | not DE   | not DE |
| EVM0024556 | LG1 | uncharacterized protein LOC1 | not DE   | not DE   | not DE   | not DE |
| EVM0020253 | LG1 | uncharacterized protein LOC1 | not DE   | not DE   | not DE   | not DE |
| EVM0001958 | LG1 | uncharacterized protein LOC1 | 2.002681 | 0.017892 | not DE   | not DE |
| EVM0015922 | LG1 | uncharacterized protein LOC1 | 1.575635 | 0.003657 | not DE   | not DE |



|            |     |                               |          |          |          |         |
|------------|-----|-------------------------------|----------|----------|----------|---------|
| EVM0013643 | LG1 | uncharacterized protein LOC1  | not DE   | not DE   | not DE   | not DE  |
| EVM0016458 | LG1 | uncharacterized protein LOC1  | not DE   | not DE   | not DE   | not DE  |
| EVM0018455 | LG1 | uncharacterized protein LOC1  | not DE   | not DE   | not DE   | not DE  |
| EVM0010642 | LG1 | uncharacterized protein LOC1  | not DE   | not DE   | not DE   | not DE  |
| EVM0008484 | LG1 | uncharacterized protein LOC1  | not DE   | not DE   | not DE   | not DE  |
| EVM0016039 | LG1 | uncharacterized protein LOC1  | not DE   | not DE   | not DE   | not DE  |
| EVM0005437 | LG1 | uncharacterized protein LOC1  | not DE   | not DE   | not DE   | not DE  |
| EVM0012480 | LG1 | uncharacterized protein LOC1  | not DE   | not DE   | not DE   | not DE  |
| EVM0006794 | LG1 | uncharacterized protein LOC1  | -1.52204 | 0.033249 | not DE   | not DE  |
| EVM0008931 | LG1 | uncharacterized protein LOC1  | not DE   | not DE   | 1.712627 | #####   |
| EVM0015573 | LG1 | uncharacterized protein LOC1  | not DE   | not DE   | not DE   | not DE  |
| EVM0020690 | LG1 | uncharacterized protein LOC1  | not DE   | not DE   | not DE   | not DE  |
| EVM0023032 | LG1 | uncharacterized protein LOC1  | not DE   | not DE   | not DE   | not DE  |
| EVM0017684 | LG1 | uncharacterized protein LOC1  | not DE   | not DE   | not DE   | not DE  |
| EVM0012351 | LG1 | uncharacterized protein LOC1  | not DE   | not DE   | not DE   | not DE  |
| EVM0007579 | LG1 | uncharacterized protein LOC1  | not DE   | not DE   | not DE   | not DE  |
| EVM0014295 | LG1 | uncharacterized protein LOC1  | not DE   | not DE   | not DE   | not DE  |
| EVM0005124 | LG1 | uric acid degradation bifunc  | not DE   | not DE   | not DE   | not DE  |
| EVM0012245 | LG1 | uridine kinase-like protein   | not DE   | not DE   | not DE   | not DE  |
| EVM0018649 | LG1 | vacuolar protein sorting-ass  | not DE   | not DE   | not DE   | not DE  |
| EVM0016295 | LG1 | vacuolar protein sorting-ass  | not DE   | not DE   | not DE   | not DE  |
| EVM0024650 | LG1 | vacuolar protein-sorting-ass  | not DE   | not DE   | not DE   | not DE  |
| EVM0021590 | LG1 | vesicle-associated membrane   | not DE   | not DE   | not DE   | not DE  |
| EVM0001993 | LG1 | vignain-like                  | not DE   | not DE   | not DE   | not DE  |
| EVM0004007 | LG1 | vignain-like                  | not DE   | not DE   | not DE   | not DE  |
| EVM0007804 | LG1 | vignain-like                  | not DE   | not DE   | not DE   | not DE  |
| EVM0017166 | LG1 | vignain-like                  | not DE   | not DE   | not DE   | not DE  |
| EVM0011809 | LG1 | weel-like protein kinase-lik  | not DE   | not DE   | not DE   | not DE  |
| EVM0013087 | LG1 | weel-like protein kinase-lik  | not DE   | not DE   | not DE   | not DE  |
| EVM0009844 | LG1 | xylem serine proteinase 1-li  | not DE   | not DE   | not DE   | not DE  |
| EVM0002401 | LG1 | xyloglucan endotransglucosyl  | not DE   | not DE   | not DE   | not DE  |
| EVM0009004 | LG1 | xyloglucan glycosyltransfera  | not DE   | not DE   | not DE   | not DE  |
| EVM0021203 | LG1 | zinc finger CCCH domain-cont  | not DE   | not DE   | not DE   | not DE  |
| EVM0020605 | LG1 | zinc finger CCCH domain-cont  | not DE   | not DE   | not DE   | not DE  |
| EVM0005419 | LG1 | zinc finger CCCH domain-cont  | not DE   | not DE   | not DE   | not DE  |
| EVM0019137 | LG1 | zinc finger HIT domain-conta  | not DE   | not DE   | not DE   | not DE  |
| EVM0008418 | LG1 | zinc finger protein CONSTANS  | not DE   | not DE   | not DE   | not DE  |
| EVM0014210 | LG1 | zinc finger protein NUTCRACK  | not DE   | not DE   | not DE   | not DE  |
| EVM0009708 | LG1 | zinc finger protein ZAT4-like | not DE   | not DE   | not DE   | not DE  |
| EVM0000298 | LG1 | 1-aminocyclopropane-1-carboxy | not DE   | not DE   | not DE   | not DE  |
| EVM0010934 | LG1 | 1-aminocyclopropane-1-carboxy | not DE   | not DE   | not DE   | not DE  |
| EVM0007546 | LG1 | 1-aminocyclopropane-carboxyla | not DE   | not DE   | not DE   | not DE  |
| EVM0020736 | LG1 | 20S proteasome beta subunit   | not DE   | not DE   | not DE   | not DE  |
| EVM0006364 | LG1 | 3-ketoacyl-CoA synthase 17    | not DE   | not DE   | 1.453754 | 0.00029 |
| EVM0008966 | LG1 | 30S ribosomal protein S15 (ch | not DE   | not DE   | not DE   | not DE  |
| EVM0011721 | LG1 | 40S ribosomal protein S11     | not DE   | not DE   | not DE   | not DE  |
| EVM0013025 | LG1 | 60S acidic ribosomal family p | not DE   | not DE   | not DE   | not DE  |
| EVM0009123 | LG1 | 60S ribosomal L13a-4 -like pr | not DE   | not DE   | not DE   | not DE  |
| EVM0004442 | LG1 | 60S ribosomal protein L18a-1  | not DE   | not DE   | not DE   | not DE  |
| EVM0000079 | LG1 | ACT domain repeat 6 isoform 1 | not DE   | not DE   | not DE   | not DE  |
| EVM0017097 | LG1 | ADP-ribosylation factor       | not DE   | not DE   | 2.680871 | 0.025   |
| EVM0011218 | LG1 | ADP-ribosylation factor GTPas | not DE   | not DE   | not DE   | not DE  |
| EVM0008480 | LG1 | ADP/ATP carrier 3 isoform 1   | not DE   | not DE   | not DE   | not DE  |
| EVM0000597 | LG1 | AGAMOUS-like 66 isoform 4     | not DE   | not DE   | not DE   | not DE  |

|            |     |                               |          |          |          |         |
|------------|-----|-------------------------------|----------|----------|----------|---------|
| EVM0015212 | LG1 | AGAMOUS-like 66 isoform 4     | not DE   | not DE   | not DE   | not DE  |
| EVM0010663 | LG1 | AGAMOUS-like protein          | not DE   | not DE   | not DE   | not DE  |
| EVM0001438 | LG1 | AIG2-like (avirulence induced | not DE   | not DE   | 1.197199 | 0.01773 |
| EVM0005749 | LG1 | AP2/B3-like transcriptional f | not DE   | not DE   | not DE   | not DE  |
| EVM0022551 | LG1 | AP2/ERF domain-containing tra | not DE   | not DE   | not DE   | not DE  |
| EVM0006148 | LG1 | AP2/ERF domain-containing tra | 2.998406 | 0.001567 | -1.68819 | 0.01594 |
| EVM0020368 | LG1 | AP2/ERF domain-containing tra | not DE   | not DE   | not DE   | not DE  |
| EVM0021741 | LG1 | AP2/ERF transcription factor  | 3.693508 | 0.00293  | not DE   | not DE  |
| EVM0024181 | LG1 | ARM repeat superfamily protei | not DE   | not DE   | not DE   | not DE  |
| EVM0001942 | LG1 | ARM repeat superfamily protei | not DE   | not DE   | not DE   | not DE  |
| EVM0004761 | LG1 | ATP binding cassette subfamil | not DE   | not DE   | not DE   | not DE  |
| EVM0006709 | LG1 | ATP binding cassette subfamil | not DE   | not DE   | not DE   | not DE  |
| EVM0010930 | LG1 | ATP binding cassette subfamil | not DE   | not DE   | not DE   | not DE  |
| EVM0009760 | LG1 | ATPase, F1 complex, delta/eps | not DE   | not DE   | not DE   | not DE  |
| EVM0010219 | LG1 | Acetyl Co-enzyme a carboxylas | not DE   | not DE   | not DE   | not DE  |
| EVM0008771 | LG1 | Acid phosphatase/vanadium-dep | not DE   | not DE   | not DE   | not DE  |
| EVM0006426 | LG1 | Alcohol dehydrogenase class-3 | not DE   | not DE   | not DE   | not DE  |
| EVM0014266 | LG1 | Alcohol oxidase               | not DE   | not DE   | not DE   | not DE  |
| EVM0004688 | LG1 | Alpha-1,6-xylosyltransferase  | not DE   | not DE   | not DE   | not DE  |
| EVM0007189 | LG1 | Alpha/beta-Hydrolases superfa | not DE   | not DE   | not DE   | not DE  |
| EVM0014535 | LG1 | Alpha/beta-Hydrolases superfa | not DE   | not DE   | not DE   | not DE  |
| EVM0015559 | LG1 | Alpha/beta-Hydrolases superfa | not DE   | not DE   | not DE   | not DE  |
| EVM0014126 | LG1 | Aluminum-activated malate tra | not DE   | not DE   | not DE   | not DE  |
| EVM0023523 | LG1 | Amino acid permease family pr | not DE   | not DE   | not DE   | not DE  |
| EVM0013768 | LG1 | Amino acid permease, putative | not DE   | not DE   | not DE   | not DE  |
| EVM0011326 | LG1 | Aminophospholipid ATPase isof | not DE   | not DE   | not DE   | not DE  |
| EVM0007732 | LG1 | Ammonium transporter 2        | not DE   | not DE   | not DE   | not DE  |
| EVM0001149 | LG1 | Ankyrin repeat family protein | not DE   | not DE   | not DE   | not DE  |
| EVM0017284 | LG1 | Ankyrin repeat family protein | not DE   | not DE   | not DE   | not DE  |
| EVM0014020 | LG1 | Aquaporin NIP1.1, putative    | not DE   | not DE   | not DE   | not DE  |
| EVM0019227 | LG1 | Aquaporin NIP1.1, putative    | not DE   | not DE   | not DE   | not DE  |
| EVM0021558 | LG1 | Aquaporin NIP1.1, putative    | not DE   | not DE   | not DE   | not DE  |
| EVM0019620 | LG1 | Arabinogalactan protein 20    | not DE   | not DE   | not DE   | not DE  |
| EVM0010505 | LG1 | BED zinc finger,hAT family di | not DE   | not DE   | not DE   | not DE  |
| EVM0021886 | LG1 | BHLH-like DNA binding protein | not DE   | not DE   | not DE   | not DE  |
| EVM0003981 | LG1 | BRASSINOSTEROID INSENSITIVE 1 | not DE   | not DE   | not DE   | not DE  |
| EVM0002359 | LG1 | BZIP transcription factor fam | not DE   | not DE   | not DE   | not DE  |
| EVM0010263 | LG1 | Basic helix-loop-helix DNA-bi | not DE   | not DE   | not DE   | not DE  |
| EVM0007010 | LG1 | Basic helix-loop-helix DNA-bi | not DE   | not DE   | not DE   | not DE  |
| EVM0023104 | LG1 | Basic helix-loop-helix DNA-bi | 3.388169 | 0.000495 | not DE   | not DE  |
| EVM0012556 | LG1 | Beta-1,4-N-acetylglucosaminy  | not DE   | not DE   | not DE   | not DE  |
| EVM0007137 | LG1 | Bifunctional inhibitor/lipid- | 2.023613 | 0.026327 | not DE   | not DE  |
| EVM0016091 | LG1 | Bifunctional inhibitor/lipid- | not DE   | not DE   | 1.35614  | 0.00444 |
| EVM0016472 | LG1 | Bifunctional inhibitor/lipid- | not DE   | not DE   | not DE   | not DE  |
| EVM0017921 | LG1 | C2H2 and C2HC zinc fingers su | not DE   | not DE   | not DE   | not DE  |
| EVM0015964 | LG1 | C2H2-type zinc finger family  | not DE   | not DE   | not DE   | not DE  |
| EVM0006855 | LG1 | CHASE domain containing histi | not DE   | not DE   | not DE   | not DE  |
| EVM0011617 | LG1 | COBRA protein-7 precursor     | not DE   | not DE   | not DE   | not DE  |
| EVM0005203 | LG1 | CONSTANS-LIKE 9-1             | not DE   | not DE   | not DE   | not DE  |
| EVM0005995 | LG1 | Calcium-binding EF-hand famil | 1.673226 | 0.011638 | 2.379765 | #####   |
| EVM0001860 | LG1 | Calcium-dependent phosphotrie | not DE   | not DE   | not DE   | not DE  |
| EVM0024457 | LG1 | Calmodulin-related, putative  | not DE   | not DE   | not DE   | not DE  |
| EVM0002782 | LG1 | Cellulose synthase-like B3, p | 1.100339 | 0.013156 | not DE   | not DE  |
| EVM0000742 | LG1 | Cellulose synthase-like D5    | not DE   | not DE   | not DE   | not DE  |

|            |     |                                |          |          |          |         |
|------------|-----|--------------------------------|----------|----------|----------|---------|
| EVM0013281 | LG1 | Chromatin remodeling complex   | not DE   | not DE   | not DE   | not DE  |
| EVM0012532 | LG1 | Class II chitinase             | not DE   | not DE   | not DE   | not DE  |
| EVM0000202 | LG1 | Clathrin adaptor complexes me  | not DE   | not DE   | not DE   | not DE  |
| EVM0019575 | LG1 | Clavata3/esr-related 20, puta  | not DE   | not DE   | not DE   | not DE  |
| EVM0006487 | LG1 | Coatomer epsilon subunit isof  | not DE   | not DE   | not DE   | not DE  |
| EVM0018034 | LG1 | Complex 1 family protein / LV  | not DE   | not DE   | not DE   | not DE  |
| EVM0017800 | LG1 | Cupredoxin superfamily protei  | not DE   | not DE   | not DE   | not DE  |
| EVM0011742 | LG1 | Cyclic nucleotide-gated chann  | not DE   | not DE   | not DE   | not DE  |
| EVM0024037 | LG1 | Cytidinediphosphate diacylgly  | not DE   | not DE   | not DE   | not DE  |
| EVM0014842 | LG1 | Cytochrome P450 724B1          | not DE   | not DE   | not DE   | not DE  |
| EVM0005257 | LG1 | Cytochrome P450 87A3           | not DE   | not DE   | not DE   | not DE  |
| EVM0009529 | LG1 | Cytochrome P450 87A3           | not DE   | not DE   | not DE   | not DE  |
| EVM0009824 | LG1 | Cytochrome P450 87A3           | not DE   | not DE   | not DE   | not DE  |
| EVM0017586 | LG1 | Cytochrome P450 87A3           | not DE   | not DE   | not DE   | not DE  |
| EVM0018001 | LG1 | Cytochrome P450, family 709,   | not DE   | not DE   | not DE   | not DE  |
| EVM0015326 | LG1 | Cytochrome P450, family 709,   | not DE   | not DE   | not DE   | not DE  |
| EVM0022780 | LG1 | Cytochrome P450, family 709,   | not DE   | not DE   | not DE   | not DE  |
| EVM0008229 | LG1 | Cytochrome P450, putative iso  | not DE   | not DE   | not DE   | not DE  |
| EVM0017022 | LG1 | Cytochrome c biogenesis prote  | not DE   | not DE   | not DE   | not DE  |
| EVM0010944 | LG1 | Cytochrome c oxidase polypept  | not DE   | not DE   | not DE   | not DE  |
| EVM0012923 | LG1 | DNA binding protein, putative  | not DE   | not DE   | not DE   | not DE  |
| EVM0022892 | LG1 | DNA binding protein, putative  | not DE   | not DE   | not DE   | not DE  |
| EVM0024401 | LG1 | DNA binding protein, putative  | not DE   | not DE   | not DE   | not DE  |
| EVM0014799 | LG1 | DNA repair metallo-beta-lacta  | not DE   | not DE   | not DE   | not DE  |
| EVM0000875 | LG1 | DNA-binding family protein     | not DE   | not DE   | not DE   | not DE  |
| EVM0005010 | LG1 | DNA/RNA polymerases superfam   | not DE   | not DE   | not DE   | not DE  |
| EVM0007583 | LG1 | DNA/RNA polymerases superfam   | not DE   | not DE   | not DE   | not DE  |
| EVM0002538 | LG1 | DNAJ heat shock N-terminal do  | not DE   | not DE   | not DE   | not DE  |
| EVM0021994 | LG1 | DNAse I-like superfamily prot  | not DE   | not DE   | not DE   | not DE  |
| EVM0006151 | LG1 | DZC (Disease resistance/zinc   | not DE   | not DE   | not DE   | not DE  |
| EVM0017748 | LG1 | DZC (Disease resistance/zinc   | not DE   | not DE   | not DE   | not DE  |
| EVM0021864 | LG1 | Desacetoxyvindoline 4-hydroxy  | not DE   | not DE   | 1.647957 | 0.00102 |
| EVM0011204 | LG1 | Digalactosyl diacylglycerol d  | not DE   | not DE   | not DE   | not DE  |
| EVM0007916 | LG1 | DnaJ homolog subfamily B memb  | -2.35743 | 8.98E-06 | not DE   | not DE  |
| EVM0023608 | LG1 | EXORDIUM like 2                | not DE   | not DE   | not DE   | not DE  |
| EVM0019731 | LG1 | Epoxide hydrolase 2            | not DE   | not DE   | 1.235064 | 0.0096  |
| EVM0010292 | LG1 | Ethylene-responsive element b  | not DE   | not DE   | not DE   | not DE  |
| EVM0013275 | LG1 | Ethylene-responsive element b  | not DE   | not DE   | not DE   | not DE  |
| EVM0023623 | LG1 | Ethylene-responsive element b  | not DE   | not DE   | not DE   | not DE  |
| EVM0019371 | LG1 | Ethylene-responsive transcrip  | not DE   | not DE   | not DE   | not DE  |
| EVM0005520 | LG1 | Eukaryotic aspartyl protease   | not DE   | not DE   | not DE   | not DE  |
| EVM0018936 | LG1 | Eukaryotic aspartyl protease   | not DE   | not DE   | not DE   | not DE  |
| EVM0010802 | LG1 | Eukaryotic release factor 1-3  | not DE   | not DE   | not DE   | not DE  |
| EVM0019459 | LG1 | Exocyst subunit exo70 family   | not DE   | not DE   | not DE   | not DE  |
| EVM0000946 | LG1 | Exportin-2 -like protein       | not DE   | not DE   | not DE   | not DE  |
| EVM0000712 | LG1 | F-box family protein, putativ  | 1.499604 | 0.029191 | not DE   | not DE  |
| EVM0018713 | LG1 | F-box/LRR-repeat protein       | not DE   | not DE   | not DE   | not DE  |
| EVM0024586 | LG1 | F-box/LRR-repeat protein       | not DE   | not DE   | not DE   | not DE  |
| EVM0016860 | LG1 | F15K9.15 protein, putative iso | not DE   | not DE   | not DE   | not DE  |
| EVM0016292 | LG1 | F15k9.21, putative isoform 1   | not DE   | not DE   | not DE   | not DE  |
| EVM0003569 | LG1 | FRIGIDA                        | not DE   | not DE   | not DE   | not DE  |
| EVM0020754 | LG1 | FRIGIDA3b-1                    | not DE   | not DE   | not DE   | not DE  |
| EVM0014226 | LG1 | Family of Uncharacterized pro  | not DE   | not DE   | not DE   | not DE  |
| EVM0022637 | LG1 | Fatty acid hydroxylase superfi | not DE   | not DE   | not DE   | not DE  |

|            |     |                               |          |          |          |         |
|------------|-----|-------------------------------|----------|----------|----------|---------|
| EVM0021257 | LG1 | Fimbrin-like protein 2        | not DE   | not DE   | not DE   | not DE  |
| EVM0000416 | LG1 | Formate dehydrogenase         | not DE   | not DE   | not DE   | not DE  |
| EVM0023172 | LG1 | Formate dehydrogenase         | not DE   | not DE   | not DE   | not DE  |
| EVM0001728 | LG1 | GCR2-like 2 isoform 1         | not DE   | not DE   | not DE   | not DE  |
| EVM0011368 | LG1 | GDSL-like Lipase/Acylhydrolas | not DE   | not DE   | not DE   | not DE  |
| EVM0021026 | LG1 | GRAM domain family protein    | not DE   | not DE   | -1.28775 | 0.02059 |
| EVM0000563 | LG1 | GRAS family transcription fac | not DE   | not DE   | not DE   | not DE  |
| EVM0000756 | LG1 | GRAS family transcription fac | not DE   | not DE   | not DE   | not DE  |
| EVM0015285 | LG1 | GRAS family transcription fac | not DE   | not DE   | not DE   | not DE  |
| EVM0020852 | LG1 | GRAS54 protein                | not DE   | not DE   | not DE   | not DE  |
| EVM0007923 | LG1 | GTP-binding family protein    | not DE   | not DE   | not DE   | not DE  |
| EVM0006286 | LG1 | GTP-binding protein sar1, put | not DE   | not DE   | not DE   | not DE  |
| EVM0014452 | LG1 | Galactose mutarotase-like sup | not DE   | not DE   | not DE   | not DE  |
| EVM0021140 | LG1 | Galacturonosyltransferase 10  | not DE   | not DE   | not DE   | not DE  |
| EVM0016681 | LG1 | Galacturonosyltransferase-lik | not DE   | not DE   | not DE   | not DE  |
| EVM0016066 | LG1 | Glutamate-1-semialdehyde 2,1- | not DE   | not DE   | not DE   | not DE  |
| EVM0020199 | LG1 | Glycosyltransferase family 29 | not DE   | not DE   | not DE   | not DE  |
| EVM0003770 | LG1 | Grave disease carrier protein | not DE   | not DE   | not DE   | not DE  |
| EVM0014165 | LG1 | H+-ATPase family protein      | not DE   | not DE   | not DE   | not DE  |
| EVM0005750 | LG1 | HCO3- transporter family      | not DE   | not DE   | not DE   | not DE  |
| EVM0023247 | LG1 | HD domain class transcription | not DE   | not DE   | not DE   | not DE  |
| EVM0002306 | LG1 | HIT-type Zinc finger family p | -1.27662 | 0.012485 | -2.01416 | #####   |
| EVM0000340 | LG1 | Heavy metal transport/detoxif | not DE   | not DE   | not DE   | not DE  |
| EVM0019230 | LG1 | Heavy metal transport/detoxif | -2.2026  | 0.012985 | not DE   | not DE  |
| EVM0021529 | LG1 | Histidine triad (Hit) protein | not DE   | not DE   | not DE   | not DE  |
| EVM0019160 | LG1 | Histone H2A variant 1         | not DE   | not DE   | 2.951459 | 0.00121 |
| EVM0011309 | LG1 | Histone-lysine N-methyltransf | not DE   | not DE   | not DE   | not DE  |
| EVM0017525 | LG1 | Homeobox-leucine zipper prote | not DE   | not DE   | not DE   | not DE  |
| EVM0006626 | LG1 | Homeodomain-like superfamily  | not DE   | not DE   | not DE   | not DE  |
| EVM0011182 | LG1 | Homeodomain-like superfamily  | not DE   | not DE   | not DE   | not DE  |
| EVM0012769 | LG1 | Indole-3-acetic acid inducibl | not DE   | not DE   | not DE   | not DE  |
| EVM0007999 | LG1 | Integral membrane HRF1 family | not DE   | not DE   | not DE   | not DE  |
| EVM0008661 | LG1 | Kelch repeat-containing prote | not DE   | not DE   | not DE   | not DE  |
| EVM0004002 | LG1 | Kinase superfamily protein is | not DE   | not DE   | not DE   | not DE  |
| EVM0006663 | LG1 | Kinase superfamily protein is | not DE   | not DE   | not DE   | not DE  |
| EVM0015804 | LG1 | Kip-related cyclin-dependent  | not DE   | not DE   | not DE   | not DE  |
| EVM0022125 | LG1 | Kynurenine--oxoglutarate tran | not DE   | not DE   | not DE   | not DE  |
| EVM0014525 | LG1 | L-aspartate oxidase isoform 1 | not DE   | not DE   | not DE   | not DE  |
| EVM0011159 | LG1 | LEAFY-like protein            | not DE   | not DE   | not DE   | not DE  |
| EVM0020207 | LG1 | LOB domain protein 25         | not DE   | not DE   | not DE   | not DE  |
| EVM0008112 | LG1 | LOB domain-containing protein | not DE   | not DE   | not DE   | not DE  |
| EVM0005524 | LG1 | LOB domain-containing protein | not DE   | not DE   | not DE   | not DE  |
| EVM0020939 | LG1 | Lateral organ boundaries doma | not DE   | not DE   | not DE   | not DE  |
| EVM0020255 | LG1 | Leucine-rich repeat protein k | not DE   | not DE   | not DE   | not DE  |
| EVM0005392 | LG1 | Long chain base2 isoform 1    | not DE   | not DE   | not DE   | not DE  |
| EVM0010950 | LG1 | Lsd one like 1 isoform 1      | not DE   | not DE   | not DE   | not DE  |
| EVM0005064 | LG1 | MYB-like DNA-binding domain p | not DE   | not DE   | not DE   | not DE  |
| EVM0013571 | LG1 | Magnesium transporter CorA fa | not DE   | not DE   | not DE   | not DE  |
| EVM0024517 | LG1 | Major facilitator superfamily | not DE   | not DE   | not DE   | not DE  |
| EVM0017739 | LG1 | Matrixin family protein       | not DE   | not DE   | not DE   | not DE  |
| EVM0016337 | LG1 | Mediator of RNA polymerase II | not DE   | not DE   | not DE   | not DE  |
| EVM0012540 | LG1 | Metal ion binding protein, pu | not DE   | not DE   | not DE   | not DE  |
| EVM0006271 | LG1 | Micronuclear linker histone p | not DE   | not DE   | not DE   | not DE  |
| EVM0005611 | LG1 | Mitochondrial import inner me | not DE   | not DE   | not DE   | not DE  |

|            |     |                                |          |          |          |         |
|------------|-----|--------------------------------|----------|----------|----------|---------|
| EVM0015089 | LG1 | Mitochondrial ribosomal prote  | not DE   | not DE   | not DE   | not DE  |
| EVM0008788 | LG1 | Mitochondrial substrate carri  | not DE   | not DE   | not DE   | not DE  |
| EVM0007649 | LG1 | Mitochondrial substrate carri  | not DE   | not DE   | not DE   | not DE  |
| EVM0003195 | LG1 | Mitogen-activated protein kin  | not DE   | not DE   | not DE   | not DE  |
| EVM0008763 | LG1 | Multidrug resistance protein   | 1.484342 | 0.001921 | not DE   | not DE  |
| EVM0002285 | LG1 | Myb domain protein 15, putati  | not DE   | not DE   | not DE   | not DE  |
| EVM0015631 | LG1 | Myb domain protein 17 isoform  | not DE   | not DE   | not DE   | not DE  |
| EVM0006106 | LG1 | Myb domain protein 39, putati  | not DE   | not DE   | not DE   | not DE  |
| EVM0018933 | LG1 | Myb domain protein 55          | not DE   | not DE   | not DE   | not DE  |
| EVM0001724 | LG1 | Myb domain protein 7, putativ  | not DE   | not DE   | not DE   | not DE  |
| EVM0016036 | LG1 | N-alpha-acetyltransferase 20   | not DE   | not DE   | not DE   | not DE  |
| EVM0006651 | LG1 | NAC domain protein, IPR003441  | not DE   | not DE   | not DE   | not DE  |
| EVM0015206 | LG1 | NAC domain-containing protein  | not DE   | not DE   | not DE   | not DE  |
| EVM0024520 | LG1 | NAC domain-containing protein  | not DE   | not DE   | not DE   | not DE  |
| EVM0018983 | LG1 | NAD(P)-binding Rossmann-fold   | not DE   | not DE   | not DE   | not DE  |
| EVM0000385 | LG1 | NAD(P)-binding Rossmann-fold   | not DE   | not DE   | not DE   | not DE  |
| EVM0001417 | LG1 | NAD(P)-binding Rossmann-fold   | not DE   | not DE   | not DE   | not DE  |
| EVM0017544 | LG1 | NADH dehydrogenase, putative   | not DE   | not DE   | not DE   | not DE  |
| EVM0022308 | LG1 | NC domain-containing protein-  | not DE   | not DE   | not DE   | not DE  |
| EVM0014721 | LG1 | Neomenthol dehydrogenase, put  | not DE   | not DE   | not DE   | not DE  |
| EVM0016089 | LG1 | Nitrate transporter 1.5        | not DE   | not DE   | not DE   | not DE  |
| EVM0020708 | LG1 | Nitrate transporter 1.5        | 3.014946 | 0.026427 | not DE   | not DE  |
| EVM0011502 | LG1 | Nodulin MtN21 /EamA-like tran  | not DE   | not DE   | not DE   | not DE  |
| EVM0021568 | LG1 | Nonspecific lipid-transfer pr  | not DE   | not DE   | not DE   | not DE  |
| EVM0021646 | LG1 | Nuclear pore complex protein,  | not DE   | not DE   | -1.64248 | #####   |
| EVM0019534 | LG1 | Nucleotide-diphospho-sugar tr  | not DE   | not DE   | not DE   | not DE  |
| EVM0002217 | LG1 | Nudix hydrolase isoform 1      | not DE   | not DE   | not DE   | not DE  |
| EVM0022305 | LG1 | Nudix hydrolase isoform 1      | not DE   | not DE   | not DE   | not DE  |
| EVM0009375 | LG1 | ORM1-like protein 1            | not DE   | not DE   | not DE   | not DE  |
| EVM0021417 | LG1 | Optic atrophy 3 protein        | not DE   | not DE   | not DE   | not DE  |
| EVM0003836 | LG1 | Oxidoreductase, zinc-binding   | not DE   | not DE   | not DE   | not DE  |
| EVM0011192 | LG1 | Oxidoreductase, zinc-binding   | not DE   | not DE   | not DE   | not DE  |
| EVM0019543 | LG1 | Oxidoreductase, zinc-binding   | not DE   | not DE   | not DE   | not DE  |
| EVM0022270 | LG1 | PAE                            | not DE   | not DE   | not DE   | not DE  |
| EVM0008869 | LG1 | PAM68, chloroplastic, putativ  | not DE   | not DE   | -3.11768 | 0.02267 |
| EVM0014838 | LG1 | PIN domain-like family protei  | not DE   | not DE   | not DE   | not DE  |
| EVM0011506 | LG1 | PSI reaction center subunit I  | -1.94861 | 0.000104 | not DE   | not DE  |
| EVM0018027 | LG1 | Palmitoyl-acyl carrier protei  | not DE   | not DE   | not DE   | not DE  |
| EVM0002408 | LG1 | Pectin lyase-like superfamily  | not DE   | not DE   | not DE   | not DE  |
| EVM0012040 | LG1 | Pectinesterase, putative       | not DE   | not DE   | not DE   | not DE  |
| EVM0021673 | LG1 | Pectinesterase, putative       | not DE   | not DE   | not DE   | not DE  |
| EVM0015287 | LG1 | Pectinesterase-2 precursor, p  | not DE   | not DE   | not DE   | not DE  |
| EVM0017334 | LG1 | Pentatricopeptide repeat-cont  | 1.089746 | 0.021651 | not DE   | not DE  |
| EVM0020371 | LG1 | Pentatricopeptide repeat-cont  | not DE   | not DE   | not DE   | not DE  |
| EVM0007344 | LG1 | Pentatricopeptide repeat-cont  | not DE   | not DE   | not DE   | not DE  |
| EVM0004898 | LG1 | Peroxidase 3                   | not DE   | not DE   | not DE   | not DE  |
| EVM0007064 | LG1 | Phospholipase D beta 1 isoform | not DE   | not DE   | not DE   | not DE  |
| EVM0023312 | LG1 | Phosphoribosyltransferase fam  | not DE   | not DE   | not DE   | not DE  |
| EVM0007374 | LG1 | Phosphotyrosine protein phosph | not DE   | not DE   | not DE   | not DE  |
| EVM0022879 | LG1 | Photosystem I reaction center  | -1.9319  | 6.87E-05 | not DE   | not DE  |
| EVM0023897 | LG1 | Pis v 5.0101 allergen 11S glo  | not DE   | not DE   | not DE   | not DE  |
| EVM0011714 | LG1 | Plant VAP                      | not DE   | not DE   | not DE   | not DE  |
| EVM0016040 | LG1 | Plant invertase/pectin methyl  | not DE   | not DE   | 1.14118  | 0.04868 |
| EVM0019730 | LG1 | Plant invertase/pectin methyl  | not DE   | not DE   | not DE   | not DE  |

|            |     |                               |          |          |          |         |
|------------|-----|-------------------------------|----------|----------|----------|---------|
| EVM0009498 | LG1 | Plant protein 1589 of Unchara | not DE   | not DE   | not DE   | not DE  |
| EVM0010575 | LG1 | Plant-specific transcription  | not DE   | not DE   | not DE   | not DE  |
| EVM0006136 | LG1 | Plasma membrane-like protein  | not DE   | not DE   | not DE   | not DE  |
| EVM0006349 | LG1 | Plasmodesmata-located protein | not DE   | not DE   | not DE   | not DE  |
| EVM0022333 | LG1 | Pleckstrin domain-containing  | not DE   | not DE   | not DE   | not DE  |
| EVM0010270 | LG1 | Pollen-specific protein SF3,  | not DE   | not DE   | not DE   | not DE  |
| EVM0007706 | LG1 | Polygalacturonase             | not DE   | not DE   | not DE   | not DE  |
| EVM0001022 | LG1 | Polygalacturonase 4, putative | not DE   | not DE   | not DE   | not DE  |
| EVM0021178 | LG1 | Polygalacturonase 4, putative | not DE   | not DE   | not DE   | not DE  |
| EVM0020795 | LG1 | Polyketide cyclase/dehydrase  | not DE   | not DE   | not DE   | not DE  |
| EVM0012700 | LG1 | Probably inactive receptor-li | not DE   | not DE   | not DE   | not DE  |
| EVM0016782 | LG1 | Protein ABC1, mitochondrial p | not DE   | not DE   | not DE   | not DE  |
| EVM0007654 | LG1 | Proteinase inhibitor          | not DE   | not DE   | not DE   | not DE  |
| EVM0012760 | LG1 | Purple acid phosphatase 15 is | not DE   | not DE   | not DE   | not DE  |
| EVM0023021 | LG1 | Putative lipid-transfer DIR1  | -2.19353 | 0.013965 | 3.572829 | 0.00775 |
| EVM0016901 | LG1 | Putative zinc finger CONSTANS | not DE   | not DE   | not DE   | not DE  |
| EVM0002272 | LG1 | RAB GTPase A5B                | not DE   | not DE   | not DE   | not DE  |
| EVM0010574 | LG1 | RAD-like 6                    | not DE   | not DE   | not DE   | not DE  |
| EVM0010257 | LG1 | RALFL33, putative             | not DE   | not DE   | not DE   | not DE  |
| EVM0002940 | LG1 | RING/FYVE/PHD zinc finger-con | not DE   | not DE   | not DE   | not DE  |
| EVM0017946 | LG1 | RING/U-box superfamily protei | not DE   | not DE   | not DE   | not DE  |
| EVM0004850 | LG1 | RING/U-box superfamily protei | not DE   | not DE   | not DE   | not DE  |
| EVM0011248 | LG1 | RING/U-box superfamily protei | not DE   | not DE   | not DE   | not DE  |
| EVM0006314 | LG1 | RNA recognition motif protein | not DE   | not DE   | not DE   | not DE  |
| EVM0003501 | LG1 | RNA-binding (RRM/RBD/RNP moti | not DE   | not DE   | not DE   | not DE  |
| EVM0019562 | LG1 | RNA-binding family protein is | not DE   | not DE   | not DE   | not DE  |
| EVM0022880 | LG1 | RNA-binding protein-defense r | -1.25561 | 0.011163 | not DE   | not DE  |
| EVM0023678 | LG1 | RNI-like superfamily protein  | not DE   | not DE   | not DE   | not DE  |
| EVM0024147 | LG1 | Raffinose synthase family pro | 2.827052 | 0.043605 | not DE   | not DE  |
| EVM0013046 | LG1 | Ras-related RABA3 -like prote | not DE   | not DE   | not DE   | not DE  |
| EVM0008656 | LG1 | RecName: Full=60S ribosomal p | not DE   | not DE   | not DE   | not DE  |
| EVM0004494 | LG1 | Receptor-like protein kinase- | not DE   | not DE   | not DE   | not DE  |
| EVM0007534 | LG1 | Remorin, putative             | not DE   | not DE   | not DE   | not DE  |
| EVM0021293 | LG1 | Rhamnose biosynthesis 1 isof  | not DE   | not DE   | not DE   | not DE  |
| EVM0004235 | LG1 | Rho GDP-dissociation inhibito | not DE   | not DE   | not DE   | not DE  |
| EVM0020364 | LG1 | Ribosomal protein L18         | not DE   | not DE   | not DE   | not DE  |
| EVM0006338 | LG1 | Ribosomal protein L6 family   | not DE   | not DE   | not DE   | not DE  |
| EVM0004837 | LG1 | Ribosomal protein L7Ae/L30e/S | not DE   | not DE   | not DE   | not DE  |
| EVM0002350 | LG1 | Ribosomal protein S27         | not DE   | not DE   | not DE   | not DE  |
| EVM0000489 | LG1 | Ribosome-recycling factor     | not DE   | not DE   | not DE   | not DE  |
| EVM0009060 | LG1 | Ripening-related protein 1    | not DE   | not DE   | not DE   | not DE  |
| EVM0017217 | LG1 | S-adenosyl-L-methionine-depen | not DE   | not DE   | not DE   | not DE  |
| EVM0017398 | LG1 | S-adenosyl-L-methionine-depen | not DE   | not DE   | not DE   | not DE  |
| EVM0021946 | LG1 | S-norcochlorine synthase 1, p | not DE   | not DE   | not DE   | not DE  |
| EVM0008077 | LG1 | S-protein, putative           | not DE   | not DE   | not DE   | not DE  |
| EVM0009486 | LG1 | S-protein, putative           | not DE   | not DE   | not DE   | not DE  |
| EVM0009975 | LG1 | SCL6                          | not DE   | not DE   | not DE   | not DE  |
| EVM0021236 | LG1 | SCL6                          | not DE   | not DE   | -1.00496 | 0.0035  |
| EVM0000990 | LG1 | SKP1-like protein 21 isoform  | not DE   | not DE   | not DE   | not DE  |
| EVM0017360 | LG1 | SNARE associated Golgi protei | not DE   | not DE   | not DE   | not DE  |
| EVM0006980 | LG1 | SOC1-1                        | -2.15456 | 6.24E-05 | not DE   | not DE  |
| EVM0008234 | LG1 | Serine-threonine protein kina | not DE   | not DE   | not DE   | not DE  |
| EVM0005106 | LG1 | Serine/threonine-protein kina | not DE   | not DE   | not DE   | not DE  |
| EVM0013666 | LG1 | Serine/threonine-protein kina | 3.264991 | 0.002112 | not DE   | not DE  |

|            |     |                                          |          |          |          |        |
|------------|-----|------------------------------------------|----------|----------|----------|--------|
| EVM0022093 | LG1 | Serine/threonine-protein phosphatase 2B  | not DE   | not DE   | not DE   | not DE |
| EVM0008350 | LG1 | Shaggy-related kinase 11, 11A            | not DE   | not DE   | not DE   | not DE |
| EVM0014150 | LG1 | Shaggy-related protein kinase 11         | not DE   | not DE   | not DE   | not DE |
| EVM0013237 | LG1 | Signal recognition particle receptor     | not DE   | not DE   | not DE   | not DE |
| EVM0012998 | LG1 | Signal recognition particle receptor     | not DE   | not DE   | not DE   | not DE |
| EVM0014740 | LG1 | Small ubiquitin-related modifier 1       | not DE   | not DE   | not DE   | not DE |
| EVM0013228 | LG1 | Sodium/hydrogen exchanger isoform 1      | not DE   | not DE   | not DE   | not DE |
| EVM0018162 | LG1 | Soybean gene regulated by cold           | not DE   | not DE   | not DE   | not DE |
| EVM0012941 | LG1 | Squamosa promoter binding protein 1      | -1.49495 | 0.003635 | not DE   | not DE |
| EVM0008801 | LG1 | Sugar phosphate exchanger 2, isoform 1   | not DE   | not DE   | not DE   | not DE |
| EVM0020585 | LG1 | Sugar phosphate exchanger 2, isoform 2   | not DE   | not DE   | not DE   | not DE |
| EVM0024013 | LG1 | Sugar phosphate exchanger 2, isoform 3   | not DE   | not DE   | not DE   | not DE |
| EVM0009091 | LG1 | Surfeit locus protein 2, putative        | not DE   | not DE   | not DE   | not DE |
| EVM0002577 | LG1 | Syntaxin of plants 42 isoform 1          | not DE   | not DE   | not DE   | not DE |
| EVM0021175 | LG1 | TCP family transcription factor 1        | not DE   | not DE   | not DE   | not DE |
| EVM0000322 | LG1 | TCP family transcription factor 1        | not DE   | not DE   | not DE   | not DE |
| EVM0000993 | LG1 | TT12-2 MATE transporter                  | not DE   | not DE   | not DE   | not DE |
| EVM0008045 | LG1 | TT12-2 MATE transporter                  | not DE   | not DE   | not DE   | not DE |
| EVM0004184 | LG1 | TUDOR-SN protein 1 isoform 1             | not DE   | not DE   | not DE   | not DE |
| EVM0003763 | LG1 | Tapetum determinant 1                    | not DE   | not DE   | not DE   | not DE |
| EVM0023565 | LG1 | Tetraspanin family protein, putative     | not DE   | not DE   | not DE   | not DE |
| EVM0010249 | LG1 | Tetratricopeptide repeat (TPR) domain    | 2.830379 | 0.002047 | not DE   | not DE |
| EVM0011170 | LG1 | Tetratricopeptide repeat (TPR) domain    | not DE   | not DE   | not DE   | not DE |
| EVM0011427 | LG1 | Tetratricopeptide repeat-like domain     | not DE   | not DE   | not DE   | not DE |
| EVM0014975 | LG1 | Thioredoxin M-type 4 isoform 1           | not DE   | not DE   | not DE   | not DE |
| EVM0024199 | LG1 | Thioredoxin M-type 4 isoform 2           | not DE   | not DE   | not DE   | not DE |
| EVM0024121 | LG1 | Transcription coactivators, putative     | not DE   | not DE   | not DE   | not DE |
| EVM0015359 | LG1 | Transcription factor                     | not DE   | not DE   | not DE   | not DE |
| EVM0015837 | LG1 | Transducin/WD40 repeat superfamily       | not DE   | not DE   | not DE   | not DE |
| EVM0013862 | LG1 | Translocase of outer membrane            | not DE   | not DE   | not DE   | not DE |
| EVM0004243 | LG1 | Trichome birefringence-like 2            | not DE   | not DE   | not DE   | not DE |
| EVM0017441 | LG1 | Trichome birefringence-like 2            | not DE   | not DE   | not DE   | not DE |
| EVM0024420 | LG1 | Tryptase                                 | not DE   | not DE   | -1.19779 | 0.0002 |
| EVM0007387 | LG1 | Tubby like protein 3 isoform 1           | not DE   | not DE   | not DE   | not DE |
| EVM0008441 | LG1 | Tubulin gamma complex-associated protein | not DE   | not DE   | not DE   | not DE |
| EVM0003485 | LG1 | UDP-D-glucuronate 4-epimerase            | not DE   | not DE   | not DE   | not DE |
| EVM0012665 | LG1 | UDP-D-glucuronate 4-epimerase            | not DE   | not DE   | not DE   | not DE |
| EVM0010421 | LG1 | UDP-Glycosyltransferase superfamily      | -1.76658 | 0.048905 | not DE   | not DE |
| EVM0020337 | LG1 | UDP-Glycosyltransferase superfamily      | not DE   | not DE   | not DE   | not DE |
| EVM0023207 | LG1 | UDP-Glycosyltransferase superfamily      | not DE   | not DE   | not DE   | not DE |
| EVM0009267 | LG1 | UDP-galactose/UDP-glucose transferase    | not DE   | not DE   | not DE   | not DE |
| EVM0021255 | LG1 | UDP-galactose/UDP-glucose transferase    | not DE   | not DE   | not DE   | not DE |
| EVM0011378 | LG1 | Ubiquitin carboxyl-terminal hydrolase    | not DE   | not DE   | not DE   | not DE |
| EVM0024081 | LG1 | Ubiquitin carboxyl-terminal hydrolase    | not DE   | not DE   | not DE   | not DE |
| EVM0016030 | LG1 | Ubiquitin family protein                 | not DE   | not DE   | not DE   | not DE |
| EVM0004997 | LG1 | Ubiquitin supergroup, Ribosomal          | not DE   | not DE   | not DE   | not DE |
| EVM0016844 | LG1 | Ubiquitin-like superfamily protein       | not DE   | not DE   | not DE   | not DE |
| EVM0011591 | LG1 | Uncharacterized protein TCM_C000001      | not DE   | not DE   | not DE   | not DE |
| EVM0020320 | LG1 | Uncharacterized protein TCM_C000002      | not DE   | not DE   | not DE   | not DE |
| EVM0005166 | LG1 | Uncharacterized protein TCM_C000003      | not DE   | not DE   | not DE   | not DE |
| EVM0000133 | LG1 | Uncharacterized protein TCM_C000004      | not DE   | not DE   | not DE   | not DE |
| EVM0018653 | LG1 | Uncharacterized protein TCM_C000005      | not DE   | not DE   | not DE   | not DE |
| EVM0009537 | LG1 | Uncharacterized protein TCM_C000006      | not DE   | not DE   | not DE   | not DE |
| EVM0019781 | LG1 | Uncharacterized protein TCM_C000007      | not DE   | not DE   | not DE   | not DE |

|            |     |                                |          |          |          |         |
|------------|-----|--------------------------------|----------|----------|----------|---------|
| EVM0004711 | LG1 | Uncharacterized protein TCM_C  | not DE   | not DE   | not DE   | not DE  |
| EVM0003335 | LG1 | Uncharacterized protein TCM_C  | not DE   | not DE   | not DE   | not DE  |
| EVM0022102 | LG1 | Uncharacterized protein TCM_C  | not DE   | not DE   | -2.23943 | 0.00058 |
| EVM0008681 | LG1 | Uncharacterized protein TCM_C  | not DE   | not DE   | 2.851253 | 0.02122 |
| EVM0017101 | LG1 | Uncharacterized protein TCM_C  | 1.562994 | 2.56E-06 | not DE   | not DE  |
| EVM0019412 | LG1 | Uncharacterized protein TCM_C  | not DE   | not DE   | not DE   | not DE  |
| EVM0020848 | LG1 | Uncharacterized protein TCM_C  | not DE   | not DE   | not DE   | not DE  |
| EVM0008818 | LG1 | Uncharacterized protein TCM_C  | not DE   | not DE   | not DE   | not DE  |
| EVM0009408 | LG1 | Uncharacterized protein TCM_C  | not DE   | not DE   | not DE   | not DE  |
| EVM0007520 | LG1 | Uncharacterized protein TCM_C  | not DE   | not DE   | not DE   | not DE  |
| EVM0019073 | LG1 | Uncharacterized protein TCM_C  | not DE   | not DE   | not DE   | not DE  |
| EVM0001404 | LG1 | Uncharacterized protein TCM_C  | not DE   | not DE   | not DE   | not DE  |
| EVM0000511 | LG1 | Uncharacterized protein TCM_C  | -1.56854 | 0.007936 | not DE   | not DE  |
| EVM0010375 | LG1 | Uncharacterized protein TCM_C  | not DE   | not DE   | not DE   | not DE  |
| EVM0018624 | LG1 | Uncharacterized protein TCM_C  | not DE   | not DE   | not DE   | not DE  |
| EVM0022457 | LG1 | Uncharacterized protein TCM_C  | not DE   | not DE   | not DE   | not DE  |
| EVM0014430 | LG1 | Uncharacterized protein TCM_C  | not DE   | not DE   | not DE   | not DE  |
| EVM0001548 | LG1 | Uncharacterized protein TCM_C  | not DE   | not DE   | not DE   | not DE  |
| EVM0004825 | LG1 | Uncharacterized protein TCM_C  | -1.35037 | 6.25E-05 | not DE   | not DE  |
| EVM0004076 | LG1 | Uncharacterized protein TCM_C  | not DE   | not DE   | not DE   | not DE  |
| EVM0007009 | LG1 | Uncharacterized protein TCM_C  | not DE   | not DE   | not DE   | not DE  |
| EVM0000692 | LG1 | Uncharacterized protein TCM_C  | not DE   | not DE   | not DE   | not DE  |
| EVM0010586 | LG1 | Uncharacterized protein TCM_C  | not DE   | not DE   | not DE   | not DE  |
| EVM0020397 | LG1 | Uncharacterized protein TCM_C  | not DE   | not DE   | not DE   | not DE  |
| EVM0019069 | LG1 | Uncharacterized protein TCM_C  | not DE   | not DE   | not DE   | not DE  |
| EVM0003216 | LG1 | Uncharacterized protein isofo  | not DE   | not DE   | not DE   | not DE  |
| EVM0004619 | LG1 | Uncharacterized protein isofo  | not DE   | not DE   | not DE   | not DE  |
| EVM0012911 | LG1 | Uncharacterized protein isofo  | not DE   | not DE   | not DE   | not DE  |
| EVM0020561 | LG1 | Uncharacterized protein isofo  | not DE   | not DE   | not DE   | not DE  |
| EVM0021009 | LG1 | Uncharacterized protein isofo  | not DE   | not DE   | not DE   | not DE  |
| EVM0024597 | LG1 | Uncharacterized protein isofo  | not DE   | not DE   | not DE   | not DE  |
| EVM0024665 | LG1 | Uncharacterized protein isofo  | not DE   | not DE   | not DE   | not DE  |
| EVM0000124 | LG1 | Uncharacterized protein isofo  | not DE   | not DE   | not DE   | not DE  |
| EVM0000314 | LG1 | Uncharacterized protein isofo  | not DE   | not DE   | not DE   | not DE  |
| EVM0001687 | LG1 | Uncharacterized protein isofo  | not DE   | not DE   | not DE   | not DE  |
| EVM0003403 | LG1 | Uncharacterized protein isofo  | not DE   | not DE   | not DE   | not DE  |
| EVM0022745 | LG1 | Uncharacterized protein isofo  | not DE   | not DE   | not DE   | not DE  |
| EVM0005798 | LG1 | UvrABC system protein C        | not DE   | not DE   | not DE   | not DE  |
| EVM0011616 | LG1 | Vacuolar cation/proton exchan  | not DE   | not DE   | not DE   | not DE  |
| EVM0009795 | LG1 | WRKY family transcription fac  | not DE   | not DE   | not DE   | not DE  |
| EVM0022523 | LG1 | WRKY transcription factor 23-  | not DE   | not DE   | not DE   | not DE  |
| EVM0007069 | LG1 | WRKY transcription factor 47-  | not DE   | not DE   | not DE   | not DE  |
| EVM0003466 | LG1 | WRKY transcription factor 6-1  | -1.54831 | 0.042076 | not DE   | not DE  |
| EVM0000134 | LG1 | WRKY-type DNA binding protein  | not DE   | not DE   | not DE   | not DE  |
| EVM0020675 | LG1 | WRKY1                          | not DE   | not DE   | not DE   | not DE  |
| EVM0009390 | LG1 | Winged-helix DNA-binding tran  | not DE   | not DE   | not DE   | not DE  |
| EVM0000482 | LG1 | Zinc finger C-x8-C-x5-C-x3-H   | 1.879419 | 0.013775 | not DE   | not DE  |
| EVM0004940 | LG1 | Zinc finger protein 4          | not DE   | not DE   | not DE   | not DE  |
| EVM0000851 | LG1 | Zinc finger protein 6, putati  | not DE   | not DE   | not DE   | not DE  |
| EVM0008493 | LG1 | Zinc knuckle family protein,   | 1.558973 | 0.017999 | not DE   | not DE  |
| EVM0005074 | LG1 | acyl-CoA thioesterase, putati  | not DE   | not DE   | not DE   | not DE  |
| EVM0013507 | LG1 | argonaute 6 protein            | not DE   | not DE   | not DE   | not DE  |
| EVM0020693 | LG1 | atpobl, putative               | not DE   | not DE   | not DE   | not DE  |
| EVM0012867 | LG1 | auxin response factor, partial | not DE   | not DE   | not DE   | not DE  |



|            |     |                                      |          |          |        |        |
|------------|-----|--------------------------------------|----------|----------|--------|--------|
| EVM0014142 | LG1 | auxin-binding protein 1              | not DE   | not DE   | not DE | not DE |
| EVM0005435 | LG1 | auxin-response factor                | not DE   | not DE   | not DE | not DE |
| EVM0002087 | LG1 | bHLH                                 | 1.432265 | 0.000915 | not DE | not DE |
| EVM0000335 | LG1 | basic helix-loop-helix protein       | not DE   | not DE   | not DE | not DE |
| EVM0018291 | LG1 | basic pentacysteine7-like protein    | not DE   | not DE   | not DE | not DE |
| EVM0017563 | LG1 | beta-amylase 5                       | not DE   | not DE   | not DE | not DE |
| EVM0019347 | LG1 | beta-amylase 5                       | not DE   | not DE   | not DE | not DE |
| EVM0020765 | LG1 | calmodulin, putative                 | not DE   | not DE   | not DE | not DE |
| EVM0022275 | LG1 | cellulose synthase                   | not DE   | not DE   | not DE | not DE |
| EVM0019365 | LG1 | chalcone isomerase                   | not DE   | not DE   | not DE | not DE |
| EVM0016989 | LG1 | chalcone synthase                    | not DE   | not DE   | not DE | not DE |
| EVM0003249 | LG1 | chitinase family protein             | not DE   | not DE   | not DE | not DE |
| EVM0002121 | LG1 | chloroplast carbonic anhydrase       | -4.36444 | 0.000127 | not DE | not DE |
| EVM0008574 | LG1 | chloroplast carbonic anhydrase       | not DE   | not DE   | not DE | not DE |
| EVM0021095 | LG1 | clathrin binding protein, putative   | not DE   | not DE   | not DE | not DE |
| EVM0001079 | LG1 | conserved hypothetical protein       | not DE   | not DE   | not DE | not DE |
| EVM0001392 | LG1 | conserved hypothetical protein       | not DE   | not DE   | not DE | not DE |
| EVM0003602 | LG1 | conserved hypothetical protein       | not DE   | not DE   | not DE | not DE |
| EVM0004256 | LG1 | conserved hypothetical protein       | not DE   | not DE   | not DE | not DE |
| EVM0007327 | LG1 | conserved hypothetical protein       | not DE   | not DE   | not DE | not DE |
| EVM0007904 | LG1 | conserved hypothetical protein       | not DE   | not DE   | not DE | not DE |
| EVM0008143 | LG1 | conserved hypothetical protein       | not DE   | not DE   | not DE | not DE |
| EVM0008203 | LG1 | conserved hypothetical protein       | not DE   | not DE   | not DE | not DE |
| EVM0013979 | LG1 | conserved hypothetical protein       | not DE   | not DE   | not DE | not DE |
| EVM0015746 | LG1 | conserved hypothetical protein       | not DE   | not DE   | not DE | not DE |
| EVM0016058 | LG1 | conserved hypothetical protein       | not DE   | not DE   | not DE | not DE |
| EVM0017215 | LG1 | conserved hypothetical protein       | not DE   | not DE   | not DE | not DE |
| EVM0018080 | LG1 | conserved hypothetical protein       | not DE   | not DE   | not DE | not DE |
| EVM0018083 | LG1 | conserved hypothetical protein       | not DE   | not DE   | not DE | not DE |
| EVM0018170 | LG1 | conserved hypothetical protein       | not DE   | not DE   | not DE | not DE |
| EVM0019698 | LG1 | conserved hypothetical protein       | not DE   | not DE   | not DE | not DE |
| EVM0020673 | LG1 | conserved hypothetical protein       | not DE   | not DE   | not DE | not DE |
| EVM0021803 | LG1 | conserved hypothetical protein       | not DE   | not DE   | not DE | not DE |
| EVM0021900 | LG1 | conserved hypothetical protein       | not DE   | not DE   | not DE | not DE |
| EVM0022448 | LG1 | conserved hypothetical protein       | -1.16578 | 0.043354 | not DE | not DE |
| EVM0005446 | LG1 | copper ion binding protein, putative | not DE   | not DE   | not DE | not DE |
| EVM0012572 | LG1 | core region of GTP cyclohydrolase    | not DE   | not DE   | not DE | not DE |
| EVM0009861 | LG1 | cyclin family protein                | not DE   | not DE   | not DE | not DE |
| EVM0021440 | LG1 | cycloartenol synthase protein        | not DE   | not DE   | not DE | not DE |
| EVM0021812 | LG1 | cytochrome P450 CYP94A1 family       | not DE   | not DE   | not DE | not DE |
| EVM0007284 | LG1 | elongation factor tu, putative       | not DE   | not DE   | not DE | not DE |
| EVM0009039 | LG1 | endo-1,3-1,4-beta-d-glucanase        | not DE   | not DE   | not DE | not DE |
| EVM0018513 | LG1 | ethylene receptor                    | not DE   | not DE   | not DE | not DE |
| EVM0007638 | LG1 | ethylene response factor 10          | not DE   | not DE   | not DE | not DE |
| EVM0003600 | LG1 | ferric-chelate reductase, putative   | not DE   | not DE   | not DE | not DE |
| EVM0000453 | LG1 | gag-pol polyprotein                  | not DE   | not DE   | not DE | not DE |
| EVM0023059 | LG1 | gag/pol protein                      | not DE   | not DE   | not DE | not DE |
| EVM0006545 | LG1 | gibberellin 2-oxidase, putative      | not DE   | not DE   | not DE | not DE |
| EVM0005170 | LG1 | gibberellin 20-oxidase, putative     | not DE   | not DE   | not DE | not DE |
| EVM0016763 | LG1 | glucose-6-phosphate 1-dehydrogenase  | not DE   | not DE   | not DE | not DE |
| EVM0001902 | LG1 | glutaredoxin family protein          | not DE   | not DE   | not DE | not DE |
| EVM0012869 | LG1 | glutathione S-transferase family     | not DE   | not DE   | not DE | not DE |
| EVM0010005 | LG1 | glutathione peroxidase               | not DE   | not DE   | not DE | not DE |
| EVM0014146 | LG1 | glutathione reductase                | not DE   | not DE   | not DE | not DE |

|            |     |                               |          |          |          |         |
|------------|-----|-------------------------------|----------|----------|----------|---------|
| EVM0001696 | LG1 | glycerol-3-phosphate acyltran | not DE   | not DE   | not DE   | not DE  |
| EVM0012300 | LG1 | glycine-rich protein          | not DE   | not DE   | not DE   | not DE  |
| EVM0006149 | LG1 | glycoside hydrolase family 9  | not DE   | not DE   | not DE   | not DE  |
| EVM0005931 | LG1 | glycosyl transferase family 1 | not DE   | not DE   | not DE   | not DE  |
| EVM0019489 | LG1 | glycosyl transferase family 2 | not DE   | not DE   | not DE   | not DE  |
| EVM0000499 | LG1 | haloacid dehalogenase-like hy | -2.00628 | 0.020988 | not DE   | not DE  |
| EVM0008290 | LG1 | heat shock protein binding pr | -6.23492 | 3.54E-21 | not DE   | not DE  |
| EVM0008094 | LG1 | hydrolase, putative           | -1.78411 | 0.006494 | not DE   | not DE  |
| EVM0014048 | LG1 | hydroperoxide lyase           | not DE   | not DE   | not DE   | not DE  |
| EVM0000080 | LG1 | hypothetical protein (mitoch  | not DE   | not DE   | not DE   | not DE  |
| EVM0021433 | LG1 | hypothetical protein (mitoch  | not DE   | not DE   | not DE   | not DE  |
| EVM0004180 | LG1 | hypothetical protein AALP_AA3 | not DE   | not DE   | not DE   | not DE  |
| EVM0008361 | LG1 | hypothetical protein AALP_AA3 | not DE   | not DE   | not DE   | not DE  |
| EVM0011051 | LG1 | hypothetical protein AALP_AA5 | not DE   | not DE   | -1.02475 | 0.04843 |
| EVM0020226 | LG1 | hypothetical protein CICLE_v1 | not DE   | not DE   | -1.10436 | #####   |
| EVM0003193 | LG1 | hypothetical protein CICLE_v1 | not DE   | not DE   | not DE   | not DE  |
| EVM0015199 | LG1 | hypothetical protein CICLE_v1 | not DE   | not DE   | not DE   | not DE  |
| EVM0000876 | LG1 | hypothetical protein CICLE_v1 | not DE   | not DE   | not DE   | not DE  |
| EVM0016952 | LG1 | hypothetical protein CICLE_v1 | not DE   | not DE   | not DE   | not DE  |
| EVM0022986 | LG1 | hypothetical protein CICLE_v1 | not DE   | not DE   | not DE   | not DE  |
| EVM0024618 | LG1 | hypothetical protein CICLE_v1 | not DE   | not DE   | not DE   | not DE  |
| EVM0010419 | LG1 | hypothetical protein CICLE_v1 | not DE   | not DE   | not DE   | not DE  |
| EVM0021841 | LG1 | hypothetical protein CICLE_v1 | not DE   | not DE   | not DE   | not DE  |
| EVM0023805 | LG1 | hypothetical protein CICLE_v1 | not DE   | not DE   | not DE   | not DE  |
| EVM0021412 | LG1 | hypothetical protein CICLE_v1 | not DE   | not DE   | not DE   | not DE  |
| EVM0022344 | LG1 | hypothetical protein CICLE_v1 | not DE   | not DE   | not DE   | not DE  |
| EVM0016863 | LG1 | hypothetical protein CICLE_v1 | not DE   | not DE   | not DE   | not DE  |
| EVM0000119 | LG1 | hypothetical protein CICLE_v1 | not DE   | not DE   | not DE   | not DE  |
| EVM0006851 | LG1 | hypothetical protein CICLE_v1 | not DE   | not DE   | not DE   | not DE  |
| EVM0010499 | LG1 | hypothetical protein CICLE_v1 | not DE   | not DE   | 1.124759 | #####   |
| EVM0010162 | LG1 | hypothetical protein CICLE_v1 | not DE   | not DE   | not DE   | not DE  |
| EVM0020204 | LG1 | hypothetical protein CICLE_v1 | not DE   | not DE   | not DE   | not DE  |
| EVM0014779 | LG1 | hypothetical protein CICLE_v1 | not DE   | not DE   | not DE   | not DE  |
| EVM0022787 | LG1 | hypothetical protein CICLE_v1 | not DE   | not DE   | not DE   | not DE  |
| EVM0014347 | LG1 | hypothetical protein CICLE_v1 | not DE   | not DE   | not DE   | not DE  |
| EVM0014038 | LG1 | hypothetical protein CICLE_v1 | not DE   | not DE   | not DE   | not DE  |
| EVM0011985 | LG1 | hypothetical protein CICLE_v1 | not DE   | not DE   | not DE   | not DE  |
| EVM0020801 | LG1 | hypothetical protein CICLE_v1 | not DE   | not DE   | not DE   | not DE  |
| EVM0005540 | LG1 | hypothetical protein CICLE_v1 | not DE   | not DE   | not DE   | not DE  |
| EVM0013002 | LG1 | hypothetical protein CICLE_v1 | not DE   | not DE   | not DE   | not DE  |
| EVM0001825 | LG1 | hypothetical protein CICLE_v1 | not DE   | not DE   | not DE   | not DE  |
| EVM0007404 | LG1 | hypothetical protein CICLE_v1 | not DE   | not DE   | not DE   | not DE  |
| EVM0017137 | LG1 | hypothetical protein CICLE_v1 | not DE   | not DE   | not DE   | not DE  |
| EVM0011026 | LG1 | hypothetical protein CICLE_v1 | not DE   | not DE   | not DE   | not DE  |
| EVM0008316 | LG1 | hypothetical protein CICLE_v1 | not DE   | not DE   | not DE   | not DE  |
| EVM0000008 | LG1 | hypothetical protein CICLE_v1 | not DE   | not DE   | not DE   | not DE  |
| EVM0011649 | LG1 | hypothetical protein CICLE_v1 | not DE   | not DE   | not DE   | not DE  |
| EVM0020711 | LG1 | hypothetical protein CICLE_v1 | not DE   | not DE   | not DE   | not DE  |
| EVM0005610 | LG1 | hypothetical protein CICLE_v1 | not DE   | not DE   | not DE   | not DE  |
| EVM0013515 | LG1 | hypothetical protein CICLE_v1 | 1.446339 | 0.028351 | not DE   | not DE  |
| EVM0010968 | LG1 | hypothetical protein CICLE_v1 | not DE   | not DE   | not DE   | not DE  |
| EVM0023603 | LG1 | hypothetical protein CICLE_v1 | not DE   | not DE   | not DE   | not DE  |
| EVM0005613 | LG1 | hypothetical protein CICLE_v1 | not DE   | not DE   | not DE   | not DE  |
| EVM0023075 | LG1 | hypothetical protein CICLE_v1 | not DE   | not DE   | not DE   | not DE  |

|            |     |                               |          |          |          |         |
|------------|-----|-------------------------------|----------|----------|----------|---------|
| EVM0002697 | LG1 | hypothetical protein CICLE_v1 | not DE   | not DE   | not DE   | not DE  |
| EVM0012930 | LG1 | hypothetical protein CICLE_v1 | not DE   | not DE   | not DE   | not DE  |
| EVM0002446 | LG1 | hypothetical protein CICLE_v1 | not DE   | not DE   | not DE   | not DE  |
| EVM0022404 | LG1 | hypothetical protein CICLE_v1 | not DE   | not DE   | not DE   | not DE  |
| EVM0020133 | LG1 | hypothetical protein CICLE_v1 | not DE   | not DE   | not DE   | not DE  |
| EVM0003380 | LG1 | hypothetical protein CICLE_v1 | not DE   | not DE   | not DE   | not DE  |
| EVM0004222 | LG1 | hypothetical protein CICLE_v1 | not DE   | not DE   | not DE   | not DE  |
| EVM0010811 | LG1 | hypothetical protein CICLE_v1 | 1.056744 | 8.24E-06 | not DE   | not DE  |
| EVM0015801 | LG1 | hypothetical protein CICLE_v1 | not DE   | not DE   | not DE   | not DE  |
| EVM0013790 | LG1 | hypothetical protein CICLE_v1 | not DE   | not DE   | not DE   | not DE  |
| EVM0010571 | LG1 | hypothetical protein CICLE_v1 | not DE   | not DE   | not DE   | not DE  |
| EVM0004955 | LG1 | hypothetical protein CICLE_v1 | not DE   | not DE   | not DE   | not DE  |
| EVM0016299 | LG1 | hypothetical protein CICLE_v1 | not DE   | not DE   | not DE   | not DE  |
| EVM0005098 | LG1 | hypothetical protein CICLE_v1 | not DE   | not DE   | not DE   | not DE  |
| EVM0022463 | LG1 | hypothetical protein CICLE_v1 | not DE   | not DE   | not DE   | not DE  |
| EVM0018429 | LG1 | hypothetical protein CICLE_v1 | not DE   | not DE   | not DE   | not DE  |
| EVM0020229 | LG1 | hypothetical protein CICLE_v1 | not DE   | not DE   | not DE   | not DE  |
| EVM0013413 | LG1 | hypothetical protein CICLE_v1 | not DE   | not DE   | not DE   | not DE  |
| EVM0019238 | LG1 | hypothetical protein CICLE_v1 | not DE   | not DE   | not DE   | not DE  |
| EVM0023651 | LG1 | hypothetical protein CICLE_v1 | not DE   | not DE   | not DE   | not DE  |
| EVM0000194 | LG1 | hypothetical protein CICLE_v1 | not DE   | not DE   | not DE   | not DE  |
| EVM0011156 | LG1 | hypothetical protein CICLE_v1 | not DE   | not DE   | -1.06045 | 0.0001  |
| EVM0008529 | LG1 | hypothetical protein CICLE_v1 | not DE   | not DE   | not DE   | not DE  |
| EVM0016480 | LG1 | hypothetical protein CICLE_v1 | not DE   | not DE   | not DE   | not DE  |
| EVM0017590 | LG1 | hypothetical protein CICLE_v1 | not DE   | not DE   | not DE   | not DE  |
| EVM0019676 | LG1 | hypothetical protein CICLE_v1 | not DE   | not DE   | not DE   | not DE  |
| EVM0002772 | LG1 | hypothetical protein CICLE_v1 | not DE   | not DE   | not DE   | not DE  |
| EVM0002915 | LG1 | hypothetical protein CICLE_v1 | not DE   | not DE   | not DE   | not DE  |
| EVM0022012 | LG1 | hypothetical protein CICLE_v1 | not DE   | not DE   | not DE   | not DE  |
| EVM0000319 | LG1 | hypothetical protein CICLE_v1 | -1.81635 | 0.02209  | -1.76728 | 0.01666 |
| EVM0023203 | LG1 | hypothetical protein CICLE_v1 | not DE   | not DE   | 2.345901 | 0.03996 |
| EVM0022405 | LG1 | hypothetical protein CICLE_v1 | not DE   | not DE   | not DE   | not DE  |
| EVM0003428 | LG1 | hypothetical protein CICLE_v1 | not DE   | not DE   | not DE   | not DE  |
| EVM0019673 | LG1 | hypothetical protein CICLE_v1 | not DE   | not DE   | not DE   | not DE  |
| EVM0011507 | LG1 | hypothetical protein CICLE_v1 | not DE   | not DE   | not DE   | not DE  |
| EVM0001467 | LG1 | hypothetical protein CICLE_v1 | not DE   | not DE   | not DE   | not DE  |
| EVM0011662 | LG1 | hypothetical protein CICLE_v1 | not DE   | not DE   | not DE   | not DE  |
| EVM0008982 | LG1 | hypothetical protein CICLE_v1 | not DE   | not DE   | not DE   | not DE  |
| EVM0002974 | LG1 | hypothetical protein CICLE_v1 | not DE   | not DE   | not DE   | not DE  |
| EVM0010186 | LG1 | hypothetical protein CICLE_v1 | not DE   | not DE   | not DE   | not DE  |
| EVM0013685 | LG1 | hypothetical protein CICLE_v1 | not DE   | not DE   | -1.06004 | #####   |
| EVM0020240 | LG1 | hypothetical protein CICLE_v1 | not DE   | not DE   | not DE   | not DE  |
| EVM0014108 | LG1 | hypothetical protein CICLE_v1 | not DE   | not DE   | not DE   | not DE  |
| EVM0001904 | LG1 | hypothetical protein CICLE_v1 | 2.477614 | 0.031959 | not DE   | not DE  |
| EVM0006631 | LG1 | hypothetical protein CICLE_v1 | not DE   | not DE   | not DE   | not DE  |
| EVM0000001 | LG1 | hypothetical protein CICLE_v1 | not DE   | not DE   | not DE   | not DE  |
| EVM0010178 | LG1 | hypothetical protein CICLE_v1 | 3.126887 | 0.026825 | 3.662911 | #####   |
| EVM0002445 | LG1 | hypothetical protein CICLE_v1 | not DE   | not DE   | not DE   | not DE  |
| EVM0013105 | LG1 | hypothetical protein CICLE_v1 | not DE   | not DE   | not DE   | not DE  |
| EVM0017745 | LG1 | hypothetical protein CICLE_v1 | not DE   | not DE   | not DE   | not DE  |
| EVM0012398 | LG1 | hypothetical protein CICLE_v1 | 1.280193 | 8.67E-17 | not DE   | not DE  |
| EVM0007833 | LG1 | hypothetical protein CICLE_v1 | not DE   | not DE   | not DE   | not DE  |
| EVM0005280 | LG1 | hypothetical protein CICLE_v1 | not DE   | not DE   | not DE   | not DE  |
| EVM0016445 | LG1 | hypothetical protein CICLE_v1 | not DE   | not DE   | not DE   | not DE  |

|            |     |                               |          |          |          |         |
|------------|-----|-------------------------------|----------|----------|----------|---------|
| EVM0018055 | LG1 | hypothetical protein CICLE_v1 | not DE   | not DE   | not DE   | not DE  |
| EVM0010915 | LG1 | hypothetical protein CICLE_v1 | not DE   | not DE   | not DE   | not DE  |
| EVM0008676 | LG1 | hypothetical protein CICLE_v1 | not DE   | not DE   | not DE   | not DE  |
| EVM0008483 | LG1 | hypothetical protein CICLE_v1 | not DE   | not DE   | not DE   | not DE  |
| EVM0007004 | LG1 | hypothetical protein CICLE_v1 | not DE   | not DE   | not DE   | not DE  |
| EVM0008549 | LG1 | hypothetical protein CICLE_v1 | not DE   | not DE   | not DE   | not DE  |
| EVM0014396 | LG1 | hypothetical protein CICLE_v1 | not DE   | not DE   | not DE   | not DE  |
| EVM0020688 | LG1 | hypothetical protein CICLE_v1 | not DE   | not DE   | not DE   | not DE  |
| EVM0003330 | LG1 | hypothetical protein CICLE_v1 | not DE   | not DE   | not DE   | not DE  |
| EVM0023419 | LG1 | hypothetical protein CICLE_v1 | not DE   | not DE   | not DE   | not DE  |
| EVM0013117 | LG1 | hypothetical protein CICLE_v1 | not DE   | not DE   | not DE   | not DE  |
| EVM0022278 | LG1 | hypothetical protein CICLE_v1 | not DE   | not DE   | not DE   | not DE  |
| EVM0009935 | LG1 | hypothetical protein CICLE_v1 | not DE   | not DE   | not DE   | not DE  |
| EVM0004349 | LG1 | hypothetical protein CICLE_v1 | not DE   | not DE   | not DE   | not DE  |
| EVM0006073 | LG1 | hypothetical protein CICLE_v1 | not DE   | not DE   | not DE   | not DE  |
| EVM0006459 | LG1 | hypothetical protein CICLE_v1 | not DE   | not DE   | not DE   | not DE  |
| EVM0004047 | LG1 | hypothetical protein CICLE_v1 | not DE   | not DE   | not DE   | not DE  |
| EVM0003860 | LG1 | hypothetical protein CICLE_v1 | not DE   | not DE   | not DE   | not DE  |
| EVM0019129 | LG1 | hypothetical protein CICLE_v1 | not DE   | not DE   | not DE   | not DE  |
| EVM0018196 | LG1 | hypothetical protein CICLE_v1 | not DE   | not DE   | not DE   | not DE  |
| EVM0010736 | LG1 | hypothetical protein CICLE_v1 | not DE   | not DE   | not DE   | not DE  |
| EVM0003691 | LG1 | hypothetical protein CICLE_v1 | not DE   | not DE   | not DE   | not DE  |
| EVM0021910 | LG1 | hypothetical protein CICLE_v1 | not DE   | not DE   | not DE   | not DE  |
| EVM0004829 | LG1 | hypothetical protein CICLE_v1 | not DE   | not DE   | not DE   | not DE  |
| EVM0010714 | LG1 | hypothetical protein CICLE_v1 | not DE   | not DE   | not DE   | not DE  |
| EVM0019182 | LG1 | hypothetical protein CICLE_v1 | 2.974844 | 0.002148 | not DE   | not DE  |
| EVM0000191 | LG1 | hypothetical protein CICLE_v1 | not DE   | not DE   | not DE   | not DE  |
| EVM0005905 | LG1 | hypothetical protein CICLE_v1 | not DE   | not DE   | not DE   | not DE  |
| EVM0010602 | LG1 | hypothetical protein CICLE_v1 | not DE   | not DE   | not DE   | not DE  |
| EVM0008518 | LG1 | hypothetical protein CICLE_v1 | not DE   | not DE   | not DE   | not DE  |
| EVM0013077 | LG1 | hypothetical protein CICLE_v1 | not DE   | not DE   | not DE   | not DE  |
| EVM0014818 | LG1 | hypothetical protein CICLE_v1 | not DE   | not DE   | not DE   | not DE  |
| EVM0005324 | LG1 | hypothetical protein CICLE_v1 | not DE   | not DE   | not DE   | not DE  |
| EVM0015980 | LG1 | hypothetical protein CICLE_v1 | not DE   | not DE   | not DE   | not DE  |
| EVM0010883 | LG1 | hypothetical protein CICLE_v1 | not DE   | not DE   | not DE   | not DE  |
| EVM0003048 | LG1 | hypothetical protein CICLE_v1 | not DE   | not DE   | not DE   | not DE  |
| EVM0020988 | LG1 | hypothetical protein CICLE_v1 | -1.29853 | 0.037681 | not DE   | not DE  |
| EVM0014673 | LG1 | hypothetical protein CICLE_v1 | not DE   | not DE   | not DE   | not DE  |
| EVM0001333 | LG1 | hypothetical protein CICLE_v1 | not DE   | not DE   | not DE   | not DE  |
| EVM0023002 | LG1 | hypothetical protein CICLE_v1 | not DE   | not DE   | not DE   | not DE  |
| EVM0018786 | LG1 | hypothetical protein CICLE_v1 | not DE   | not DE   | not DE   | not DE  |
| EVM0015350 | LG1 | hypothetical protein CICLE_v1 | not DE   | not DE   | not DE   | not DE  |
| EVM0002266 | LG1 | hypothetical protein CICLE_v1 | not DE   | not DE   | not DE   | not DE  |
| EVM0017383 | LG1 | hypothetical protein CICLE_v1 | not DE   | not DE   | -5.19609 | 0.00364 |
| EVM0019472 | LG1 | hypothetical protein CICLE_v1 | not DE   | not DE   | not DE   | not DE  |
| EVM0009712 | LG1 | hypothetical protein CICLE_v1 | not DE   | not DE   | not DE   | not DE  |
| EVM0017780 | LG1 | hypothetical protein CICLE_v1 | not DE   | not DE   | not DE   | not DE  |
| EVM0019713 | LG1 | hypothetical protein CICLE_v1 | not DE   | not DE   | not DE   | not DE  |
| EVM0005377 | LG1 | hypothetical protein CICLE_v1 | not DE   | not DE   | not DE   | not DE  |
| EVM0013049 | LG1 | hypothetical protein CICLE_v1 | not DE   | not DE   | not DE   | not DE  |
| EVM0002177 | LG1 | hypothetical protein CICLE_v1 | not DE   | not DE   | not DE   | not DE  |
| EVM0009357 | LG1 | hypothetical protein CICLE_v1 | not DE   | not DE   | not DE   | not DE  |
| EVM0001502 | LG1 | hypothetical protein CICLE_v1 | not DE   | not DE   | not DE   | not DE  |
| EVM0024102 | LG1 | hypothetical protein CICLE_v1 | not DE   | not DE   | not DE   | not DE  |

|            |     |                               |          |          |          |         |
|------------|-----|-------------------------------|----------|----------|----------|---------|
| EVM0001688 | LG1 | hypothetical protein CICLE_v1 | not DE   | not DE   | not DE   | not DE  |
| EVM0003585 | LG1 | hypothetical protein CICLE_v1 | not DE   | not DE   | not DE   | not DE  |
| EVM0015861 | LG1 | hypothetical protein CICLE_v1 | not DE   | not DE   | not DE   | not DE  |
| EVM0019123 | LG1 | hypothetical protein CICLE_v1 | not DE   | not DE   | not DE   | not DE  |
| EVM0001726 | LG1 | hypothetical protein CICLE_v1 | not DE   | not DE   | not DE   | not DE  |
| EVM0005575 | LG1 | hypothetical protein CICLE_v1 | not DE   | not DE   | not DE   | not DE  |
| EVM0012206 | LG1 | hypothetical protein CICLE_v1 | not DE   | not DE   | not DE   | not DE  |
| EVM0008360 | LG1 | hypothetical protein CICLE_v1 | 1.018347 | 0.024796 | not DE   | not DE  |
| EVM0013872 | LG1 | hypothetical protein CICLE_v1 | not DE   | not DE   | not DE   | not DE  |
| EVM0009403 | LG1 | hypothetical protein CICLE_v1 | not DE   | not DE   | not DE   | not DE  |
| EVM0004914 | LG1 | hypothetical protein CICLE_v1 | not DE   | not DE   | not DE   | not DE  |
| EVM0003962 | LG1 | hypothetical protein CICLE_v1 | not DE   | not DE   | not DE   | not DE  |
| EVM0020003 | LG1 | hypothetical protein CICLE_v1 | not DE   | not DE   | not DE   | not DE  |
| EVM0009597 | LG1 | hypothetical protein CICLE_v1 | not DE   | not DE   | not DE   | not DE  |
| EVM0003007 | LG1 | hypothetical protein CICLE_v1 | not DE   | not DE   | not DE   | not DE  |
| EVM0012599 | LG1 | hypothetical protein CICLE_v1 | not DE   | not DE   | not DE   | not DE  |
| EVM0018156 | LG1 | hypothetical protein CICLE_v1 | not DE   | not DE   | not DE   | not DE  |
| EVM0012275 | LG1 | hypothetical protein CICLE_v1 | not DE   | not DE   | not DE   | not DE  |
| EVM0016043 | LG1 | hypothetical protein CICLE_v1 | not DE   | not DE   | not DE   | not DE  |
| EVM0000128 | LG1 | hypothetical protein CICLE_v1 | not DE   | not DE   | not DE   | not DE  |
| EVM0005960 | LG1 | hypothetical protein CICLE_v1 | not DE   | not DE   | not DE   | not DE  |
| EVM0002031 | LG1 | hypothetical protein CICLE_v1 | not DE   | not DE   | not DE   | not DE  |
| EVM0015854 | LG1 | hypothetical protein CICLE_v1 | not DE   | not DE   | not DE   | not DE  |
| EVM0012595 | LG1 | hypothetical protein CICLE_v1 | 1.932865 | 0.028852 | not DE   | not DE  |
| EVM0005320 | LG1 | hypothetical protein CICLE_v1 | not DE   | not DE   | not DE   | not DE  |
| EVM0005692 | LG1 | hypothetical protein CICLE_v1 | not DE   | not DE   | 1.107673 | 0.00889 |
| EVM0022076 | LG1 | hypothetical protein CICLE_v1 | not DE   | not DE   | not DE   | not DE  |
| EVM0009291 | LG1 | hypothetical protein CICLE_v1 | not DE   | not DE   | not DE   | not DE  |
| EVM0011448 | LG1 | hypothetical protein CICLE_v1 | not DE   | not DE   | not DE   | not DE  |
| EVM0012977 | LG1 | hypothetical protein CICLE_v1 | not DE   | not DE   | not DE   | not DE  |
| EVM0005999 | LG1 | hypothetical protein CICLE_v1 | not DE   | not DE   | not DE   | not DE  |
| EVM0006443 | LG1 | hypothetical protein CICLE_v1 | not DE   | not DE   | not DE   | not DE  |
| EVM0009862 | LG1 | hypothetical protein CICLE_v1 | not DE   | not DE   | not DE   | not DE  |
| EVM0010509 | LG1 | hypothetical protein CICLE_v1 | not DE   | not DE   | not DE   | not DE  |
| EVM0013023 | LG1 | hypothetical protein CICLE_v1 | not DE   | not DE   | not DE   | not DE  |
| EVM0019587 | LG1 | hypothetical protein CICLE_v1 | not DE   | not DE   | not DE   | not DE  |
| EVM0007881 | LG1 | hypothetical protein CICLE_v1 | not DE   | not DE   | not DE   | not DE  |
| EVM0023017 | LG1 | hypothetical protein CICLE_v1 | not DE   | not DE   | not DE   | not DE  |
| EVM0020948 | LG1 | hypothetical protein CICLE_v1 | not DE   | not DE   | not DE   | not DE  |
| EVM0002506 | LG1 | hypothetical protein CICLE_v1 | not DE   | not DE   | not DE   | not DE  |
| EVM0014091 | LG1 | hypothetical protein CICLE_v1 | not DE   | not DE   | not DE   | not DE  |
| EVM0009811 | LG1 | hypothetical protein CICLE_v1 | not DE   | not DE   | not DE   | not DE  |
| EVM0003143 | LG1 | hypothetical protein CICLE_v1 | not DE   | not DE   | not DE   | not DE  |
| EVM0010102 | LG1 | hypothetical protein CICLE_v1 | not DE   | not DE   | not DE   | not DE  |
| EVM0006556 | LG1 | hypothetical protein CICLE_v1 | -1.92294 | 0.004947 | not DE   | not DE  |
| EVM0006814 | LG1 | hypothetical protein CICLE_v1 | not DE   | not DE   | not DE   | not DE  |
| EVM0000065 | LG1 | hypothetical protein CICLE_v1 | 1.164908 | 0.008345 | not DE   | not DE  |
| EVM0015586 | LG1 | hypothetical protein CICLE_v1 | not DE   | not DE   | not DE   | not DE  |
| EVM0006000 | LG1 | hypothetical protein CICLE_v1 | not DE   | not DE   | not DE   | not DE  |
| EVM0013721 | LG1 | hypothetical protein CICLE_v1 | not DE   | not DE   | not DE   | not DE  |
| EVM0021650 | LG1 | hypothetical protein CICLE_v1 | not DE   | not DE   | not DE   | not DE  |
| EVM0008322 | LG1 | hypothetical protein CICLE_v1 | not DE   | not DE   | not DE   | not DE  |
| EVM0002159 | LG1 | hypothetical protein CICLE_v1 | not DE   | not DE   | not DE   | not DE  |
| EVM0002440 | LG1 | hypothetical protein CICLE_v1 | not DE   | not DE   | not DE   | not DE  |

|            |     |                               |          |          |          |         |
|------------|-----|-------------------------------|----------|----------|----------|---------|
| EVM0020698 | LG1 | hypothetical protein CICLE_v1 | not DE   | not DE   | not DE   | not DE  |
| EVM0011925 | LG1 | hypothetical protein CICLE_v1 | not DE   | not DE   | not DE   | not DE  |
| EVM0024388 | LG1 | hypothetical protein CICLE_v1 | not DE   | not DE   | not DE   | not DE  |
| EVM0015770 | LG1 | hypothetical protein CICLE_v1 | -2.43891 | 0.000345 | not DE   | not DE  |
| EVM0007585 | LG1 | hypothetical protein CICLE_v1 | not DE   | not DE   | not DE   | not DE  |
| EVM0013042 | LG1 | hypothetical protein CICLE_v1 | not DE   | not DE   | not DE   | not DE  |
| EVM0019031 | LG1 | hypothetical protein CICLE_v1 | not DE   | not DE   | not DE   | not DE  |
| EVM0016788 | LG1 | hypothetical protein CICLE_v1 | not DE   | not DE   | -1.30276 | #####   |
| EVM0014620 | LG1 | hypothetical protein CICLE_v1 | not DE   | not DE   | not DE   | not DE  |
| EVM0002443 | LG1 | hypothetical protein CICLE_v1 | not DE   | not DE   | not DE   | not DE  |
| EVM0009678 | LG1 | hypothetical protein CICLE_v1 | not DE   | not DE   | not DE   | not DE  |
| EVM0005641 | LG1 | hypothetical protein CICLE_v1 | not DE   | not DE   | not DE   | not DE  |
| EVM0003299 | LG1 | hypothetical protein CICLE_v1 | not DE   | not DE   | not DE   | not DE  |
| EVM0001347 | LG1 | hypothetical protein CICLE_v1 | 2.016756 | 0.016662 | not DE   | not DE  |
| EVM0002575 | LG1 | hypothetical protein CICLE_v1 | not DE   | not DE   | not DE   | not DE  |
| EVM0017496 | LG1 | hypothetical protein CICLE_v1 | not DE   | not DE   | not DE   | not DE  |
| EVM0019091 | LG1 | hypothetical protein CICLE_v1 | not DE   | not DE   | not DE   | not DE  |
| EVM0016374 | LG1 | hypothetical protein CICLE_v1 | not DE   | not DE   | not DE   | not DE  |
| EVM0004207 | LG1 | hypothetical protein CICLE_v1 | -2.66229 | 0.016683 | -3.94285 | #####   |
| EVM0009558 | LG1 | hypothetical protein CICLE_v1 | not DE   | not DE   | not DE   | not DE  |
| EVM0017814 | LG1 | hypothetical protein CICLE_v1 | not DE   | not DE   | not DE   | not DE  |
| EVM0019314 | LG1 | hypothetical protein CICLE_v1 | not DE   | not DE   | not DE   | not DE  |
| EVM0013707 | LG1 | hypothetical protein CICLE_v1 | not DE   | not DE   | not DE   | not DE  |
| EVM0011994 | LG1 | hypothetical protein CICLE_v1 | not DE   | not DE   | not DE   | not DE  |
| EVM0021164 | LG1 | hypothetical protein CICLE_v1 | not DE   | not DE   | not DE   | not DE  |
| EVM0006179 | LG1 | hypothetical protein CICLE_v1 | -1.32262 | 1.17E-06 | not DE   | not DE  |
| EVM0015358 | LG1 | hypothetical protein CICLE_v1 | not DE   | not DE   | not DE   | not DE  |
| EVM0017132 | LG1 | hypothetical protein CICLE_v1 | not DE   | not DE   | not DE   | not DE  |
| EVM0002641 | LG1 | hypothetical protein CICLE_v1 | not DE   | not DE   | not DE   | not DE  |
| EVM0022747 | LG1 | hypothetical protein CICLE_v1 | not DE   | not DE   | not DE   | not DE  |
| EVM0022431 | LG1 | hypothetical protein CICLE_v1 | -1.21325 | 0.000182 | not DE   | not DE  |
| EVM0006066 | LG1 | hypothetical protein CICLE_v1 | not DE   | not DE   | not DE   | not DE  |
| EVM0018305 | LG1 | hypothetical protein CICLE_v1 | not DE   | not DE   | not DE   | not DE  |
| EVM0013308 | LG1 | hypothetical protein CICLE_v1 | not DE   | not DE   | not DE   | not DE  |
| EVM0021840 | LG1 | hypothetical protein CICLE_v1 | not DE   | not DE   | not DE   | not DE  |
| EVM0022486 | LG1 | hypothetical protein CICLE_v1 | not DE   | not DE   | not DE   | not DE  |
| EVM0000179 | LG1 | hypothetical protein CICLE_v1 | not DE   | not DE   | not DE   | not DE  |
| EVM0020534 | LG1 | hypothetical protein CICLE_v1 | not DE   | not DE   | not DE   | not DE  |
| EVM0003404 | LG1 | hypothetical protein CICLE_v1 | not DE   | not DE   | not DE   | not DE  |
| EVM0020453 | LG1 | hypothetical protein CICLE_v1 | not DE   | not DE   | not DE   | not DE  |
| EVM0020230 | LG1 | hypothetical protein CICLE_v1 | not DE   | not DE   | not DE   | not DE  |
| EVM0015612 | LG1 | hypothetical protein CICLE_v1 | 2.291213 | 0.009904 | not DE   | not DE  |
| EVM0020800 | LG1 | hypothetical protein CICLE_v1 | not DE   | not DE   | not DE   | not DE  |
| EVM0014629 | LG1 | hypothetical protein CICLE_v1 | not DE   | not DE   | not DE   | not DE  |
| EVM0003662 | LG1 | hypothetical protein CICLE_v1 | not DE   | not DE   | not DE   | not DE  |
| EVM0001124 | LG1 | hypothetical protein CICLE_v1 | not DE   | not DE   | not DE   | not DE  |
| EVM0023981 | LG1 | hypothetical protein CICLE_v1 | not DE   | not DE   | not DE   | not DE  |
| EVM0007968 | LG1 | hypothetical protein CICLE_v1 | 1.675389 | 0.000336 | 1.341457 | 0.00214 |
| EVM0015164 | LG1 | hypothetical protein CICLE_v1 | not DE   | not DE   | not DE   | not DE  |
| EVM0002040 | LG1 | hypothetical protein CICLE_v1 | not DE   | not DE   | not DE   | not DE  |
| EVM0005045 | LG1 | hypothetical protein CICLE_v1 | not DE   | not DE   | not DE   | not DE  |
| EVM0008466 | LG1 | hypothetical protein CICLE_v1 | not DE   | not DE   | not DE   | not DE  |
| EVM0007091 | LG1 | hypothetical protein CICLE_v1 | -1.70897 | 0.03848  | not DE   | not DE  |
| EVM0016477 | LG1 | hypothetical protein CICLE_v1 | not DE   | not DE   | not DE   | not DE  |

|            |     |                               |          |          |          |         |
|------------|-----|-------------------------------|----------|----------|----------|---------|
| EVM0017073 | LG1 | hypothetical protein CICLE_v1 | not DE   | not DE   | not DE   | not DE  |
| EVM0003564 | LG1 | hypothetical protein CICLE_v1 | -2.59613 | 5.14E-05 | not DE   | not DE  |
| EVM0015211 | LG1 | hypothetical protein CICLE_v1 | not DE   | not DE   | not DE   | not DE  |
| EVM0001373 | LG1 | hypothetical protein CICLE_v1 | not DE   | not DE   | not DE   | not DE  |
| EVM0005338 | LG1 | hypothetical protein CICLE_v1 | not DE   | not DE   | not DE   | not DE  |
| EVM0015834 | LG1 | hypothetical protein CICLE_v1 | not DE   | not DE   | not DE   | not DE  |
| EVM0019414 | LG1 | hypothetical protein CICLE_v1 | not DE   | not DE   | not DE   | not DE  |
| EVM0000960 | LG1 | hypothetical protein CICLE_v1 | not DE   | not DE   | not DE   | not DE  |
| EVM0020419 | LG1 | hypothetical protein CICLE_v1 | not DE   | not DE   | not DE   | not DE  |
| EVM0006061 | LG1 | hypothetical protein CICLE_v1 | not DE   | not DE   | not DE   | not DE  |
| EVM0004607 | LG1 | hypothetical protein CICLE_v1 | not DE   | not DE   | not DE   | not DE  |
| EVM0020436 | LG1 | hypothetical protein CICLE_v1 | not DE   | not DE   | not DE   | not DE  |
| EVM0015055 | LG1 | hypothetical protein CICLE_v1 | not DE   | not DE   | not DE   | not DE  |
| EVM0018096 | LG1 | hypothetical protein CICLE_v1 | not DE   | not DE   | not DE   | not DE  |
| EVM0017189 | LG1 | hypothetical protein CICLE_v1 | not DE   | not DE   | not DE   | not DE  |
| EVM0020329 | LG1 | hypothetical protein CICLE_v1 | not DE   | not DE   | not DE   | not DE  |
| EVM0011353 | LG1 | hypothetical protein CICLE_v1 | -1.68459 | 0.02625  | not DE   | not DE  |
| EVM0012273 | LG1 | hypothetical protein CICLE_v1 | not DE   | not DE   | not DE   | not DE  |
| EVM0019078 | LG1 | hypothetical protein CICLE_v1 | not DE   | not DE   | 1.993523 | 0.00013 |
| EVM0015607 | LG1 | hypothetical protein CICLE_v1 | not DE   | not DE   | not DE   | not DE  |
| EVM0015865 | LG1 | hypothetical protein CICLE_v1 | not DE   | not DE   | not DE   | not DE  |
| EVM0013722 | LG1 | hypothetical protein CICLE_v1 | not DE   | not DE   | not DE   | not DE  |
| EVM0022029 | LG1 | hypothetical protein CICLE_v1 | not DE   | not DE   | not DE   | not DE  |
| EVM0019779 | LG1 | hypothetical protein CICLE_v1 | not DE   | not DE   | not DE   | not DE  |
| EVM0020810 | LG1 | hypothetical protein CICLE_v1 | 2.515348 | 2.65E-15 | 1.009723 | 0.00415 |
| EVM0018100 | LG1 | hypothetical protein CICLE_v1 | not DE   | not DE   | not DE   | not DE  |
| EVM0006456 | LG1 | hypothetical protein CICLE_v1 | -4.91011 | 7.91E-09 | 3.665557 | 0.02999 |
| EVM0014486 | LG1 | hypothetical protein CICLE_v1 | not DE   | not DE   | not DE   | not DE  |
| EVM0009679 | LG1 | hypothetical protein CICLE_v1 | not DE   | not DE   | not DE   | not DE  |
| EVM0022775 | LG1 | hypothetical protein CICLE_v1 | not DE   | not DE   | not DE   | not DE  |
| EVM0007763 | LG1 | hypothetical protein CICLE_v1 | not DE   | not DE   | not DE   | not DE  |
| EVM0001466 | LG1 | hypothetical protein CICLE_v1 | not DE   | not DE   | 1.619081 | #####   |
| EVM0004244 | LG1 | hypothetical protein CICLE_v1 | not DE   | not DE   | not DE   | not DE  |
| EVM0012656 | LG1 | hypothetical protein CICLE_v1 | not DE   | not DE   | not DE   | not DE  |
| EVM0019889 | LG1 | hypothetical protein CICLE_v1 | not DE   | not DE   | not DE   | not DE  |
| EVM0009987 | LG1 | hypothetical protein CICLE_v1 | not DE   | not DE   | not DE   | not DE  |
| EVM0012699 | LG1 | hypothetical protein CICLE_v1 | not DE   | not DE   | not DE   | not DE  |
| EVM0021092 | LG1 | hypothetical protein CICLE_v1 | 1.704072 | 0.027545 | not DE   | not DE  |
| EVM0023438 | LG1 | hypothetical protein CICLE_v1 | not DE   | not DE   | not DE   | not DE  |
| EVM0006614 | LG1 | hypothetical protein CICLE_v1 | not DE   | not DE   | not DE   | not DE  |
| EVM0014963 | LG1 | hypothetical protein CICLE_v1 | not DE   | not DE   | not DE   | not DE  |
| EVM0005943 | LG1 | hypothetical protein CICLE_v1 | not DE   | not DE   | not DE   | not DE  |
| EVM0017704 | LG1 | hypothetical protein CICLE_v1 | not DE   | not DE   | not DE   | not DE  |
| EVM0023767 | LG1 | hypothetical protein CICLE_v1 | not DE   | not DE   | not DE   | not DE  |
| EVM0009439 | LG1 | hypothetical protein CICLE_v1 | not DE   | not DE   | not DE   | not DE  |
| EVM0002584 | LG1 | hypothetical protein CICLE_v1 | not DE   | not DE   | not DE   | not DE  |
| EVM0007379 | LG1 | hypothetical protein CICLE_v1 | not DE   | not DE   | not DE   | not DE  |
| EVM0010390 | LG1 | hypothetical protein CICLE_v1 | not DE   | not DE   | not DE   | not DE  |
| EVM0004024 | LG1 | hypothetical protein CICLE_v1 | not DE   | not DE   | not DE   | not DE  |
| EVM0005484 | LG1 | hypothetical protein CICLE_v1 | not DE   | not DE   | not DE   | not DE  |
| EVM0024217 | LG1 | hypothetical protein CICLE_v1 | not DE   | not DE   | not DE   | not DE  |
| EVM0012014 | LG1 | hypothetical protein CICLE_v1 | not DE   | not DE   | not DE   | not DE  |
| EVM0000227 | LG1 | hypothetical protein CICLE_v1 | not DE   | not DE   | not DE   | not DE  |
| EVM0021490 | LG1 | hypothetical protein CICLE_v1 | not DE   | not DE   | not DE   | not DE  |

|            |     |                               |          |          |          |         |
|------------|-----|-------------------------------|----------|----------|----------|---------|
| EVM0001956 | LG1 | hypothetical protein CICLE_v1 | not DE   | not DE   | not DE   | not DE  |
| EVM0016169 | LG1 | hypothetical protein CICLE_v1 | not DE   | not DE   | not DE   | not DE  |
| EVM0006757 | LG1 | hypothetical protein CICLE_v1 | not DE   | not DE   | not DE   | not DE  |
| EVM0002939 | LG1 | hypothetical protein CICLE_v1 | not DE   | not DE   | not DE   | not DE  |
| EVM0014095 | LG1 | hypothetical protein CICLE_v1 | not DE   | not DE   | not DE   | not DE  |
| EVM0000989 | LG1 | hypothetical protein CICLE_v1 | not DE   | not DE   | not DE   | not DE  |
| EVM0011929 | LG1 | hypothetical protein CICLE_v1 | not DE   | not DE   | not DE   | not DE  |
| EVM0013584 | LG1 | hypothetical protein CICLE_v1 | not DE   | not DE   | not DE   | not DE  |
| EVM0006003 | LG1 | hypothetical protein CICLE_v1 | not DE   | not DE   | not DE   | not DE  |
| EVM0014511 | LG1 | hypothetical protein CICLE_v1 | not DE   | not DE   | not DE   | not DE  |
| EVM0020910 | LG1 | hypothetical protein CICLE_v1 | not DE   | not DE   | not DE   | not DE  |
| EVM0008851 | LG1 | hypothetical protein CICLE_v1 | not DE   | not DE   | not DE   | not DE  |
| EVM0007953 | LG1 | hypothetical protein CICLE_v1 | not DE   | not DE   | not DE   | not DE  |
| EVM0008251 | LG1 | hypothetical protein CICLE_v1 | not DE   | not DE   | not DE   | not DE  |
| EVM0010734 | LG1 | hypothetical protein CICLE_v1 | not DE   | not DE   | not DE   | not DE  |
| EVM0004036 | LG1 | hypothetical protein CICLE_v1 | not DE   | not DE   | not DE   | not DE  |
| EVM0022008 | LG1 | hypothetical protein CICLE_v1 | not DE   | not DE   | not DE   | not DE  |
| EVM0024479 | LG1 | hypothetical protein CICLE_v1 | not DE   | not DE   | not DE   | not DE  |
| EVM0000115 | LG1 | hypothetical protein CICLE_v1 | not DE   | not DE   | not DE   | not DE  |
| EVM0013241 | LG1 | hypothetical protein CICLE_v1 | not DE   | not DE   | not DE   | not DE  |
| EVM0005793 | LG1 | hypothetical protein CICLE_v1 | not DE   | not DE   | not DE   | not DE  |
| EVM0013187 | LG1 | hypothetical protein CICLE_v1 | not DE   | not DE   | not DE   | not DE  |
| EVM0015268 | LG1 | hypothetical protein CICLE_v1 | not DE   | not DE   | not DE   | not DE  |
| EVM0023245 | LG1 | hypothetical protein CICLE_v1 | not DE   | not DE   | not DE   | not DE  |
| EVM0024378 | LG1 | hypothetical protein CICLE_v1 | not DE   | not DE   | not DE   | not DE  |
| EVM0006842 | LG1 | hypothetical protein CICLE_v1 | not DE   | not DE   | not DE   | not DE  |
| EVM0021520 | LG1 | hypothetical protein CICLE_v1 | not DE   | not DE   | not DE   | not DE  |
| EVM0013736 | LG1 | hypothetical protein CICLE_v1 | not DE   | not DE   | not DE   | not DE  |
| EVM0013351 | LG1 | hypothetical protein CICLE_v1 | not DE   | not DE   | not DE   | not DE  |
| EVM0007567 | LG1 | hypothetical protein CICLE_v1 | not DE   | not DE   | not DE   | not DE  |
| EVM0015621 | LG1 | hypothetical protein CICLE_v1 | not DE   | not DE   | 1.199005 | 0.00362 |
| EVM0013431 | LG1 | hypothetical protein CICLE_v1 | not DE   | not DE   | not DE   | not DE  |
| EVM0008235 | LG1 | hypothetical protein CICLE_v1 | not DE   | not DE   | not DE   | not DE  |
| EVM0010097 | LG1 | hypothetical protein CICLE_v1 | not DE   | not DE   | -1.26279 | #####   |
| EVM0014351 | LG1 | hypothetical protein CICLE_v1 | not DE   | not DE   | not DE   | not DE  |
| EVM0006023 | LG1 | hypothetical protein CICLE_v1 | not DE   | not DE   | not DE   | not DE  |
| EVM0014275 | LG1 | hypothetical protein CICLE_v1 | not DE   | not DE   | -1.00145 | #####   |
| EVM0021717 | LG1 | hypothetical protein CICLE_v1 | not DE   | not DE   | not DE   | not DE  |
| EVM0002069 | LG1 | hypothetical protein CICLE_v1 | not DE   | not DE   | not DE   | not DE  |
| EVM0009462 | LG1 | hypothetical protein CICLE_v1 | not DE   | not DE   | not DE   | not DE  |
| EVM0013575 | LG1 | hypothetical protein CICLE_v1 | not DE   | not DE   | not DE   | not DE  |
| EVM0022155 | LG1 | hypothetical protein CICLE_v1 | not DE   | not DE   | -1.00915 | 0.00232 |
| EVM0008642 | LG1 | hypothetical protein CICLE_v1 | 1.275082 | 0.019264 | not DE   | not DE  |
| EVM0006272 | LG1 | hypothetical protein CICLE_v1 | not DE   | not DE   | not DE   | not DE  |
| EVM0012726 | LG1 | hypothetical protein CICLE_v1 | not DE   | not DE   | not DE   | not DE  |
| EVM0015409 | LG1 | hypothetical protein CICLE_v1 | not DE   | not DE   | not DE   | not DE  |
| EVM0002421 | LG1 | hypothetical protein CICLE_v1 | not DE   | not DE   | not DE   | not DE  |
| EVM0006197 | LG1 | hypothetical protein CICLE_v1 | not DE   | not DE   | not DE   | not DE  |
| EVM0023858 | LG1 | hypothetical protein CICLE_v1 | not DE   | not DE   | not DE   | not DE  |
| EVM0020867 | LG1 | hypothetical protein CICLE_v1 | not DE   | not DE   | not DE   | not DE  |
| EVM0003245 | LG1 | hypothetical protein CICLE_v1 | not DE   | not DE   | not DE   | not DE  |
| EVM0002676 | LG1 | hypothetical protein CICLE_v1 | not DE   | not DE   | not DE   | not DE  |
| EVM0017135 | LG1 | hypothetical protein CICLE_v1 | not DE   | not DE   | not DE   | not DE  |
| EVM0003416 | LG1 | hypothetical protein CICLE_v1 | not DE   | not DE   | not DE   | not DE  |



|            |     |                               |          |          |          |         |
|------------|-----|-------------------------------|----------|----------|----------|---------|
| EVM0008458 | LG1 | hypothetical protein CICLE_v1 | not DE   | not DE   | not DE   | not DE  |
| EVM0023224 | LG1 | hypothetical protein CICLE_v1 | not DE   | not DE   | not DE   | not DE  |
| EVM0010322 | LG1 | hypothetical protein CICLE_v1 | not DE   | not DE   | not DE   | not DE  |
| EVM0017626 | LG1 | hypothetical protein CICLE_v1 | not DE   | not DE   | not DE   | not DE  |
| EVM0015096 | LG1 | hypothetical protein CICLE_v1 | 2.523411 | 1.85E-09 | not DE   | not DE  |
| EVM0020383 | LG1 | hypothetical protein CICLE_v1 | not DE   | not DE   | not DE   | not DE  |
| EVM0024279 | LG1 | hypothetical protein CICLE_v1 | not DE   | not DE   | not DE   | not DE  |
| EVM0004391 | LG1 | hypothetical protein CICLE_v1 | not DE   | not DE   | not DE   | not DE  |
| EVM0000668 | LG1 | hypothetical protein CICLE_v1 | not DE   | not DE   | not DE   | not DE  |
| EVM0020936 | LG1 | hypothetical protein CICLE_v1 | not DE   | not DE   | not DE   | not DE  |
| EVM0008238 | LG1 | hypothetical protein CICLE_v1 | not DE   | not DE   | not DE   | not DE  |
| EVM0005172 | LG1 | hypothetical protein CICLE_v1 | not DE   | not DE   | not DE   | not DE  |
| EVM0000059 | LG1 | hypothetical protein CICLE_v1 | not DE   | not DE   | not DE   | not DE  |
| EVM0018240 | LG1 | hypothetical protein CICLE_v1 | not DE   | not DE   | not DE   | not DE  |
| EVM0003100 | LG1 | hypothetical protein CICLE_v1 | not DE   | not DE   | not DE   | not DE  |
| EVM0013656 | LG1 | hypothetical protein CICLE_v1 | not DE   | not DE   | not DE   | not DE  |
| EVM0009726 | LG1 | hypothetical protein CICLE_v1 | not DE   | not DE   | not DE   | not DE  |
| EVM0002660 | LG1 | hypothetical protein CICLE_v1 | not DE   | not DE   | not DE   | not DE  |
| EVM0009967 | LG1 | hypothetical protein CICLE_v1 | 2.70368  | 0.002461 | not DE   | not DE  |
| EVM0021794 | LG1 | hypothetical protein CICLE_v1 | not DE   | not DE   | not DE   | not DE  |
| EVM0008866 | LG1 | hypothetical protein CICLE_v1 | not DE   | not DE   | not DE   | not DE  |
| EVM0004136 | LG1 | hypothetical protein CICLE_v1 | not DE   | not DE   | not DE   | not DE  |
| EVM0021424 | LG1 | hypothetical protein CICLE_v1 | not DE   | not DE   | not DE   | not DE  |
| EVM0005173 | LG1 | hypothetical protein CICLE_v1 | not DE   | not DE   | not DE   | not DE  |
| EVM0000251 | LG1 | hypothetical protein CICLE_v1 | not DE   | not DE   | not DE   | not DE  |
| EVM0002423 | LG1 | hypothetical protein CICLE_v1 | not DE   | not DE   | not DE   | not DE  |
| EVM0020065 | LG1 | hypothetical protein CICLE_v1 | not DE   | not DE   | not DE   | not DE  |
| EVM0004498 | LG1 | hypothetical protein CICLE_v1 | not DE   | not DE   | not DE   | not DE  |
| EVM0007062 | LG1 | hypothetical protein CICLE_v1 | not DE   | not DE   | not DE   | not DE  |
| EVM0003274 | LG1 | hypothetical protein CICLE_v1 | not DE   | not DE   | not DE   | not DE  |
| EVM0024191 | LG1 | hypothetical protein CICLE_v1 | not DE   | not DE   | not DE   | not DE  |
| EVM0001969 | LG1 | hypothetical protein CICLE_v1 | not DE   | not DE   | 1.730217 | 0.00448 |
| EVM0004594 | LG1 | hypothetical protein CICLE_v1 | not DE   | not DE   | not DE   | not DE  |
| EVM0020028 | LG1 | hypothetical protein CICLE_v1 | -1.7109  | 0.031411 | -1.75023 | #####   |
| EVM0013984 | LG1 | hypothetical protein CICLE_v1 | not DE   | not DE   | not DE   | not DE  |
| EVM0015802 | LG1 | hypothetical protein CICLE_v1 | not DE   | not DE   | not DE   | not DE  |
| EVM0004964 | LG1 | hypothetical protein CICLE_v1 | not DE   | not DE   | not DE   | not DE  |
| EVM0021136 | LG1 | hypothetical protein CICLE_v1 | not DE   | not DE   | not DE   | not DE  |
| EVM0013283 | LG1 | hypothetical protein CICLE_v1 | not DE   | not DE   | not DE   | not DE  |
| EVM0007223 | LG1 | hypothetical protein CICLE_v1 | not DE   | not DE   | not DE   | not DE  |
| EVM0024381 | LG1 | hypothetical protein CICLE_v1 | not DE   | not DE   | not DE   | not DE  |
| EVM0019370 | LG1 | hypothetical protein CICLE_v1 | not DE   | not DE   | not DE   | not DE  |
| EVM0007158 | LG1 | hypothetical protein CICLE_v1 | not DE   | not DE   | not DE   | not DE  |
| EVM0016242 | LG1 | hypothetical protein CICLE_v1 | not DE   | not DE   | not DE   | not DE  |
| EVM0019383 | LG1 | hypothetical protein CICLE_v1 | not DE   | not DE   | not DE   | not DE  |
| EVM0008212 | LG1 | hypothetical protein CICLE_v1 | not DE   | not DE   | not DE   | not DE  |
| EVM0002670 | LG1 | hypothetical protein CICLE_v1 | not DE   | not DE   | not DE   | not DE  |
| EVM0018979 | LG1 | hypothetical protein CICLE_v1 | not DE   | not DE   | not DE   | not DE  |
| EVM0012967 | LG1 | hypothetical protein CICLE_v1 | not DE   | not DE   | not DE   | not DE  |
| EVM0012089 | LG1 | hypothetical protein CICLE_v1 | not DE   | not DE   | not DE   | not DE  |
| EVM0016210 | LG1 | hypothetical protein CICLE_v1 | not DE   | not DE   | not DE   | not DE  |
| EVM0003710 | LG1 | hypothetical protein CICLE_v1 | not DE   | not DE   | 1.485255 | 0.00111 |
| EVM0022286 | LG1 | hypothetical protein CICLE_v1 | -1.92587 | 0.049179 | not DE   | not DE  |
| EVM0023079 | LG1 | hypothetical protein CICLE_v1 | not DE   | not DE   | not DE   | not DE  |

|            |     |                               |          |          |          |         |
|------------|-----|-------------------------------|----------|----------|----------|---------|
| EVM0005249 | LG1 | hypothetical protein CICLE_v1 | not DE   | not DE   | not DE   | not DE  |
| EVM0007236 | LG1 | hypothetical protein CICLE_v1 | not DE   | not DE   | not DE   | not DE  |
| EVM0002680 | LG1 | hypothetical protein CICLE_v1 | not DE   | not DE   | not DE   | not DE  |
| EVM0024513 | LG1 | hypothetical protein CICLE_v1 | not DE   | not DE   | not DE   | not DE  |
| EVM0021301 | LG1 | hypothetical protein CICLE_v1 | not DE   | not DE   | not DE   | not DE  |
| EVM0013122 | LG1 | hypothetical protein CICLE_v1 | not DE   | not DE   | not DE   | not DE  |
| EVM0000799 | LG1 | hypothetical protein CICLE_v1 | not DE   | not DE   | not DE   | not DE  |
| EVM0007055 | LG1 | hypothetical protein CICLE_v1 | not DE   | not DE   | not DE   | not DE  |
| EVM0010784 | LG1 | hypothetical protein CICLE_v1 | not DE   | not DE   | not DE   | not DE  |
| EVM0008437 | LG1 | hypothetical protein CICLE_v1 | not DE   | not DE   | not DE   | not DE  |
| EVM0004356 | LG1 | hypothetical protein CICLE_v1 | -2.0832  | 1.04E-12 | not DE   | not DE  |
| EVM0018617 | LG1 | hypothetical protein CICLE_v1 | not DE   | not DE   | not DE   | not DE  |
| EVM0014528 | LG1 | hypothetical protein CICLE_v1 | not DE   | not DE   | not DE   | not DE  |
| EVM0021081 | LG1 | hypothetical protein CICLE_v1 | not DE   | not DE   | not DE   | not DE  |
| EVM0023663 | LG1 | hypothetical protein CICLE_v1 | not DE   | not DE   | not DE   | not DE  |
| EVM0007813 | LG1 | hypothetical protein CICLE_v1 | not DE   | not DE   | not DE   | not DE  |
| EVM0006313 | LG1 | hypothetical protein CICLE_v1 | 1.019742 | 0.00467  | not DE   | not DE  |
| EVM0018191 | LG1 | hypothetical protein CICLE_v1 | not DE   | not DE   | not DE   | not DE  |
| EVM0018586 | LG1 | hypothetical protein CICLE_v1 | not DE   | not DE   | not DE   | not DE  |
| EVM0001864 | LG1 | hypothetical protein CICLE_v1 | not DE   | not DE   | not DE   | not DE  |
| EVM0007523 | LG1 | hypothetical protein CICLE_v1 | not DE   | not DE   | not DE   | not DE  |
| EVM0017610 | LG1 | hypothetical protein CICLE_v1 | not DE   | not DE   | not DE   | not DE  |
| EVM0014822 | LG1 | hypothetical protein CICLE_v1 | not DE   | not DE   | not DE   | not DE  |
| EVM0021277 | LG1 | hypothetical protein CICLE_v1 | not DE   | not DE   | not DE   | not DE  |
| EVM0014195 | LG1 | hypothetical protein CICLE_v1 | not DE   | not DE   | not DE   | not DE  |
| EVM0007147 | LG1 | hypothetical protein CICLE_v1 | not DE   | not DE   | not DE   | not DE  |
| EVM0006926 | LG1 | hypothetical protein CICLE_v1 | not DE   | not DE   | not DE   | not DE  |
| EVM0020061 | LG1 | hypothetical protein CICLE_v1 | not DE   | not DE   | not DE   | not DE  |
| EVM0020687 | LG1 | hypothetical protein CICLE_v1 | not DE   | not DE   | not DE   | not DE  |
| EVM0001181 | LG1 | hypothetical protein CICLE_v1 | 1.110352 | 0.001235 | not DE   | not DE  |
| EVM0008555 | LG1 | hypothetical protein CICLE_v1 | not DE   | not DE   | not DE   | not DE  |
| EVM0001527 | LG1 | hypothetical protein CICLE_v1 | not DE   | not DE   | not DE   | not DE  |
| EVM0022213 | LG1 | hypothetical protein CICLE_v1 | not DE   | not DE   | not DE   | not DE  |
| EVM0022813 | LG1 | hypothetical protein CICLE_v1 | not DE   | not DE   | not DE   | not DE  |
| EVM0017612 | LG1 | hypothetical protein CICLE_v1 | not DE   | not DE   | not DE   | not DE  |
| EVM0016164 | LG1 | hypothetical protein CICLE_v1 | not DE   | not DE   | not DE   | not DE  |
| EVM0006302 | LG1 | hypothetical protein CICLE_v1 | not DE   | not DE   | not DE   | not DE  |
| EVM0000250 | LG1 | hypothetical protein CICLE_v1 | not DE   | not DE   | not DE   | not DE  |
| EVM0018502 | LG1 | hypothetical protein CICLE_v1 | not DE   | not DE   | not DE   | not DE  |
| EVM0022697 | LG1 | hypothetical protein CICLE_v1 | not DE   | not DE   | not DE   | not DE  |
| EVM0008510 | LG1 | hypothetical protein CICLE_v1 | not DE   | not DE   | not DE   | not DE  |
| EVM0021044 | LG1 | hypothetical protein CICLE_v1 | not DE   | not DE   | not DE   | not DE  |
| EVM0004969 | LG1 | hypothetical protein CICLE_v1 | not DE   | not DE   | not DE   | not DE  |
| EVM0016809 | LG1 | hypothetical protein CICLE_v1 | -1.25841 | 0.00013  | not DE   | not DE  |
| EVM0023239 | LG1 | hypothetical protein CICLE_v1 | not DE   | not DE   | not DE   | not DE  |
| EVM0004301 | LG1 | hypothetical protein CICLE_v1 | not DE   | not DE   | not DE   | not DE  |
| EVM0015656 | LG1 | hypothetical protein CICLE_v1 | not DE   | not DE   | 1.200744 | 0.00254 |
| EVM0004028 | LG1 | hypothetical protein CICLE_v1 | not DE   | not DE   | not DE   | not DE  |
| EVM0010323 | LG1 | hypothetical protein CICLE_v1 | not DE   | not DE   | not DE   | not DE  |
| EVM0002608 | LG1 | hypothetical protein CICLE_v1 | not DE   | not DE   | not DE   | not DE  |
| EVM0016259 | LG1 | hypothetical protein CICLE_v1 | not DE   | not DE   | not DE   | not DE  |
| EVM0023956 | LG1 | hypothetical protein CICLE_v1 | not DE   | not DE   | not DE   | not DE  |
| EVM0015514 | LG1 | hypothetical protein CICLE_v1 | not DE   | not DE   | not DE   | not DE  |
| EVM0022061 | LG1 | hypothetical protein CICLE_v1 | not DE   | not DE   | not DE   | not DE  |

|            |     |                               |          |          |          |         |
|------------|-----|-------------------------------|----------|----------|----------|---------|
| EVM0005317 | LG1 | hypothetical protein CICLE_v1 | not DE   | not DE   | not DE   | not DE  |
| EVM0008639 | LG1 | hypothetical protein CICLE_v1 | not DE   | not DE   | not DE   | not DE  |
| EVM0017483 | LG1 | hypothetical protein CICLE_v1 | not DE   | not DE   | not DE   | not DE  |
| EVM0017141 | LG1 | hypothetical protein CICLE_v1 | not DE   | not DE   | not DE   | not DE  |
| EVM0018262 | LG1 | hypothetical protein CICLE_v1 | not DE   | not DE   | not DE   | not DE  |
| EVM0002041 | LG1 | hypothetical protein CICLE_v1 | 1.027351 | 0.043771 | not DE   | not DE  |
| EVM0012483 | LG1 | hypothetical protein CICLE_v1 | not DE   | not DE   | not DE   | not DE  |
| EVM0012048 | LG1 | hypothetical protein CICLE_v1 | not DE   | not DE   | not DE   | not DE  |
| EVM0009393 | LG1 | hypothetical protein CICLE_v1 | not DE   | not DE   | not DE   | not DE  |
| EVM0000655 | LG1 | hypothetical protein CICLE_v1 | not DE   | not DE   | not DE   | not DE  |
| EVM0006229 | LG1 | hypothetical protein CICLE_v1 | not DE   | not DE   | not DE   | not DE  |
| EVM0020251 | LG1 | hypothetical protein CICLE_v1 | 1.636828 | 0.000707 | not DE   | not DE  |
| EVM0017125 | LG1 | hypothetical protein CICLE_v1 | not DE   | not DE   | not DE   | not DE  |
| EVM0002765 | LG1 | hypothetical protein CICLE_v1 | not DE   | not DE   | not DE   | not DE  |
| EVM0002015 | LG1 | hypothetical protein CICLE_v1 | not DE   | not DE   | not DE   | not DE  |
| EVM0011178 | LG1 | hypothetical protein CICLE_v1 | not DE   | not DE   | not DE   | not DE  |
| EVM0008428 | LG1 | hypothetical protein CICLE_v1 | not DE   | not DE   | not DE   | not DE  |
| EVM0020277 | LG1 | hypothetical protein CICLE_v1 | not DE   | not DE   | not DE   | not DE  |
| EVM0009395 | LG1 | hypothetical protein CICLE_v1 | not DE   | not DE   | not DE   | not DE  |
| EVM0008168 | LG1 | hypothetical protein CICLE_v1 | not DE   | not DE   | not DE   | not DE  |
| EVM0004026 | LG1 | hypothetical protein CICLE_v1 | not DE   | not DE   | not DE   | not DE  |
| EVM0009568 | LG1 | hypothetical protein CICLE_v1 | not DE   | not DE   | not DE   | not DE  |
| EVM0016678 | LG1 | hypothetical protein CICLE_v1 | not DE   | not DE   | not DE   | not DE  |
| EVM0007821 | LG1 | hypothetical protein CICLE_v1 | not DE   | not DE   | not DE   | not DE  |
| EVM0007118 | LG1 | hypothetical protein CICLE_v1 | not DE   | not DE   | not DE   | not DE  |
| EVM0020637 | LG1 | hypothetical protein CICLE_v1 | not DE   | not DE   | not DE   | not DE  |
| EVM0005112 | LG1 | hypothetical protein CICLE_v1 | not DE   | not DE   | not DE   | not DE  |
| EVM0017256 | LG1 | hypothetical protein CICLE_v1 | not DE   | not DE   | not DE   | not DE  |
| EVM0006189 | LG1 | hypothetical protein CICLE_v1 | not DE   | not DE   | not DE   | not DE  |
| EVM0001576 | LG1 | hypothetical protein CICLE_v1 | not DE   | not DE   | not DE   | not DE  |
| EVM0002160 | LG1 | hypothetical protein CICLE_v1 | not DE   | not DE   | not DE   | not DE  |
| EVM0012069 | LG1 | hypothetical protein CICLE_v1 | not DE   | not DE   | not DE   | not DE  |
| EVM0013792 | LG1 | hypothetical protein CICLE_v1 | not DE   | not DE   | not DE   | not DE  |
| EVM0022113 | LG1 | hypothetical protein CICLE_v1 | not DE   | not DE   | not DE   | not DE  |
| EVM0023978 | LG1 | hypothetical protein CICLE_v1 | not DE   | not DE   | not DE   | not DE  |
| EVM0001623 | LG1 | hypothetical protein CICLE_v1 | -6.91252 | 0.008755 | -5.57225 | 0.01706 |
| EVM0019277 | LG1 | hypothetical protein CICLE_v1 | not DE   | not DE   | not DE   | not DE  |
| EVM0018403 | LG1 | hypothetical protein CICLE_v1 | not DE   | not DE   | not DE   | not DE  |
| EVM0005918 | LG1 | hypothetical protein CICLE_v1 | not DE   | not DE   | not DE   | not DE  |
| EVM0023412 | LG1 | hypothetical protein CICLE_v1 | not DE   | not DE   | not DE   | not DE  |
| EVM0005151 | LG1 | hypothetical protein CICLE_v1 | not DE   | not DE   | not DE   | not DE  |
| EVM0024435 | LG1 | hypothetical protein CICLE_v1 | not DE   | not DE   | not DE   | not DE  |
| EVM0001561 | LG1 | hypothetical protein CICLE_v1 | not DE   | not DE   | not DE   | not DE  |
| EVM0015560 | LG1 | hypothetical protein CICLE_v1 | not DE   | not DE   | not DE   | not DE  |
| EVM0014220 | LG1 | hypothetical protein CICLE_v1 | not DE   | not DE   | not DE   | not DE  |
| EVM0000794 | LG1 | hypothetical protein CICLE_v1 | not DE   | not DE   | not DE   | not DE  |
| EVM0005797 | LG1 | hypothetical protein CICLE_v1 | not DE   | not DE   | not DE   | not DE  |
| EVM0020078 | LG1 | hypothetical protein CICLE_v1 | not DE   | not DE   | not DE   | not DE  |
| EVM0013132 | LG1 | hypothetical protein CICLE_v1 | not DE   | not DE   | not DE   | not DE  |
| EVM0010013 | LG1 | hypothetical protein CICLE_v1 | not DE   | not DE   | not DE   | not DE  |
| EVM0000417 | LG1 | hypothetical protein CICLE_v1 | not DE   | not DE   | 1.133164 | 0.00119 |
| EVM0022440 | LG1 | hypothetical protein CICLE_v1 | not DE   | not DE   | not DE   | not DE  |
| EVM0008942 | LG1 | hypothetical protein CICLE_v1 | -1.66688 | 0.038734 | not DE   | not DE  |
| EVM0012735 | LG1 | hypothetical protein CICLE_v1 | not DE   | not DE   | not DE   | not DE  |

|            |     |                               |          |          |          |         |
|------------|-----|-------------------------------|----------|----------|----------|---------|
| EVM0003240 | LG1 | hypothetical protein CICLE_v1 | not DE   | not DE   | not DE   | not DE  |
| EVM0013720 | LG1 | hypothetical protein CICLE_v1 | 1.221694 | 0.02533  | not DE   | not DE  |
| EVM0016451 | LG1 | hypothetical protein CICLE_v1 | not DE   | not DE   | not DE   | not DE  |
| EVM0002182 | LG1 | hypothetical protein CICLE_v1 | not DE   | not DE   | not DE   | not DE  |
| EVM0013495 | LG1 | hypothetical protein CICLE_v1 | not DE   | not DE   | not DE   | not DE  |
| EVM0010992 | LG1 | hypothetical protein CICLE_v1 | not DE   | not DE   | not DE   | not DE  |
| EVM0004253 | LG1 | hypothetical protein CICLE_v1 | not DE   | not DE   | not DE   | not DE  |
| EVM0003623 | LG1 | hypothetical protein CICLE_v1 | not DE   | not DE   | not DE   | not DE  |
| EVM0003410 | LG1 | hypothetical protein CICLE_v1 | -1.25334 | 9.91E-06 | not DE   | not DE  |
| EVM0006986 | LG1 | hypothetical protein CICLE_v1 | not DE   | not DE   | not DE   | not DE  |
| EVM0009569 | LG1 | hypothetical protein CICLE_v1 | not DE   | not DE   | not DE   | not DE  |
| EVM0012893 | LG1 | hypothetical protein CICLE_v1 | not DE   | not DE   | not DE   | not DE  |
| EVM0001506 | LG1 | hypothetical protein CICLE_v1 | not DE   | not DE   | not DE   | not DE  |
| EVM0015202 | LG1 | hypothetical protein CICLE_v1 | not DE   | not DE   | not DE   | not DE  |
| EVM0023879 | LG1 | hypothetical protein CICLE_v1 | not DE   | not DE   | -1.16603 | 0.03393 |
| EVM0017134 | LG1 | hypothetical protein CICLE_v1 | not DE   | not DE   | not DE   | not DE  |
| EVM0007040 | LG1 | hypothetical protein CICLE_v1 | not DE   | not DE   | not DE   | not DE  |
| EVM0008377 | LG1 | hypothetical protein CICLE_v1 | 1.018377 | 0.024968 | not DE   | not DE  |
| EVM0001497 | LG1 | hypothetical protein CICLE_v1 | not DE   | not DE   | not DE   | not DE  |
| EVM0004672 | LG1 | hypothetical protein CICLE_v1 | not DE   | not DE   | not DE   | not DE  |
| EVM0000630 | LG1 | hypothetical protein CICLE_v1 | not DE   | not DE   | not DE   | not DE  |
| EVM0017606 | LG1 | hypothetical protein CICLE_v1 | not DE   | not DE   | not DE   | not DE  |
| EVM0021917 | LG1 | hypothetical protein CICLE_v1 | not DE   | not DE   | not DE   | not DE  |
| EVM0015390 | LG1 | hypothetical protein CICLE_v1 | not DE   | not DE   | not DE   | not DE  |
| EVM0021640 | LG1 | hypothetical protein CICLE_v1 | not DE   | not DE   | not DE   | not DE  |
| EVM0002033 | LG1 | hypothetical protein CICLE_v1 | not DE   | not DE   | not DE   | not DE  |
| EVM0000826 | LG1 | hypothetical protein CICLE_v1 | 1.761221 | 0.003869 | not DE   | not DE  |
| EVM0013401 | LG1 | hypothetical protein CICLE_v1 | not DE   | not DE   | not DE   | not DE  |
| EVM0004397 | LG1 | hypothetical protein CICLE_v1 | not DE   | not DE   | not DE   | not DE  |
| EVM0018873 | LG1 | hypothetical protein CICLE_v1 | not DE   | not DE   | not DE   | not DE  |
| EVM0011760 | LG1 | hypothetical protein CICLE_v1 | not DE   | not DE   | not DE   | not DE  |
| EVM0017287 | LG1 | hypothetical protein CICLE_v1 | not DE   | not DE   | not DE   | not DE  |
| EVM0021926 | LG1 | hypothetical protein CICLE_v1 | not DE   | not DE   | not DE   | not DE  |
| EVM0009863 | LG1 | hypothetical protein CICLE_v1 | not DE   | not DE   | not DE   | not DE  |
| EVM0010486 | LG1 | hypothetical protein CICLE_v1 | not DE   | not DE   | not DE   | not DE  |
| EVM0006845 | LG1 | hypothetical protein CICLE_v1 | not DE   | not DE   | not DE   | not DE  |
| EVM0016602 | LG1 | hypothetical protein CICLE_v1 | not DE   | not DE   | not DE   | not DE  |
| EVM0019860 | LG1 | hypothetical protein CICLE_v1 | not DE   | not DE   | not DE   | not DE  |
| EVM0011299 | LG1 | hypothetical protein CICLE_v1 | not DE   | not DE   | not DE   | not DE  |
| EVM0015470 | LG1 | hypothetical protein CICLE_v1 | not DE   | not DE   | not DE   | not DE  |
| EVM0010542 | LG1 | hypothetical protein CICLE_v1 | not DE   | not DE   | not DE   | not DE  |
| EVM0013398 | LG1 | hypothetical protein CICLE_v1 | not DE   | not DE   | not DE   | not DE  |
| EVM0015655 | LG1 | hypothetical protein CICLE_v1 | not DE   | not DE   | not DE   | not DE  |
| EVM0005627 | LG1 | hypothetical protein CICLE_v1 | not DE   | not DE   | not DE   | not DE  |
| EVM0007935 | LG1 | hypothetical protein CICLE_v1 | -1.64194 | 0.000449 | not DE   | not DE  |
| EVM0013084 | LG1 | hypothetical protein CICLE_v1 | not DE   | not DE   | not DE   | not DE  |
| EVM0013135 | LG1 | hypothetical protein CICLE_v1 | not DE   | not DE   | not DE   | not DE  |
| EVM0009602 | LG1 | hypothetical protein CICLE_v1 | -6.71768 | 3.11E-69 | -3.17821 | #####   |
| EVM0023606 | LG1 | hypothetical protein CICLE_v1 | not DE   | not DE   | not DE   | not DE  |
| EVM0020650 | LG1 | hypothetical protein CICLE_v1 | not DE   | not DE   | not DE   | not DE  |
| EVM0007149 | LG1 | hypothetical protein CICLE_v1 | not DE   | not DE   | not DE   | not DE  |
| EVM0005031 | LG1 | hypothetical protein CICLE_v1 | not DE   | not DE   | not DE   | not DE  |
| EVM0020413 | LG1 | hypothetical protein CICLE_v1 | not DE   | not DE   | not DE   | not DE  |
| EVM0004259 | LG1 | hypothetical protein CICLE_v1 | not DE   | not DE   | not DE   | not DE  |

|            |     |                               |          |          |          |         |
|------------|-----|-------------------------------|----------|----------|----------|---------|
| EVM0024448 | LG1 | hypothetical protein CICLE_v1 | not DE   | not DE   | not DE   | not DE  |
| EVM0003862 | LG1 | hypothetical protein CICLE_v1 | not DE   | not DE   | not DE   | not DE  |
| EVM0014384 | LG1 | hypothetical protein CICLE_v1 | not DE   | not DE   | not DE   | not DE  |
| EVM0008285 | LG1 | hypothetical protein CICLE_v1 | not DE   | not DE   | not DE   | not DE  |
| EVM0021161 | LG1 | hypothetical protein CICLE_v1 | not DE   | not DE   | not DE   | not DE  |
| EVM0021004 | LG1 | hypothetical protein CICLE_v1 | not DE   | not DE   | not DE   | not DE  |
| EVM0008702 | LG1 | hypothetical protein CICLE_v1 | 1.089925 | 0.036253 | not DE   | not DE  |
| EVM0019686 | LG1 | hypothetical protein CICLE_v1 | not DE   | not DE   | not DE   | not DE  |
| EVM0016736 | LG1 | hypothetical protein CICLE_v1 | not DE   | not DE   | not DE   | not DE  |
| EVM0010829 | LG1 | hypothetical protein CICLE_v1 | 3.281664 | 2.12E-07 | not DE   | not DE  |
| EVM0001866 | LG1 | hypothetical protein CICLE_v1 | not DE   | not DE   | not DE   | not DE  |
| EVM0009142 | LG1 | hypothetical protein CICLE_v1 | not DE   | not DE   | not DE   | not DE  |
| EVM0000029 | LG1 | hypothetical protein CICLE_v1 | not DE   | not DE   | 3.690757 | 0.02575 |
| EVM0022930 | LG1 | hypothetical protein CICLE_v1 | not DE   | not DE   | not DE   | not DE  |
| EVM0001606 | LG1 | hypothetical protein CICLE_v1 | not DE   | not DE   | not DE   | not DE  |
| EVM0008076 | LG1 | hypothetical protein CICLE_v1 | not DE   | not DE   | not DE   | not DE  |
| EVM0008355 | LG1 | hypothetical protein CICLE_v1 | not DE   | not DE   | not DE   | not DE  |
| EVM0018928 | LG1 | hypothetical protein CICLE_v1 | not DE   | not DE   | not DE   | not DE  |
| EVM0021624 | LG1 | hypothetical protein CICLE_v1 | not DE   | not DE   | not DE   | not DE  |
| EVM0007810 | LG1 | hypothetical protein CICLE_v1 | not DE   | not DE   | not DE   | not DE  |
| EVM0014131 | LG1 | hypothetical protein CICLE_v1 | not DE   | not DE   | not DE   | not DE  |
| EVM0002333 | LG1 | hypothetical protein CICLE_v1 | not DE   | not DE   | not DE   | not DE  |
| EVM0022143 | LG1 | hypothetical protein CICLE_v1 | not DE   | not DE   | not DE   | not DE  |
| EVM0002153 | LG1 | hypothetical protein CICLE_v1 | not DE   | not DE   | not DE   | not DE  |
| EVM0014694 | LG1 | hypothetical protein CICLE_v1 | not DE   | not DE   | not DE   | not DE  |
| EVM0010326 | LG1 | hypothetical protein CICLE_v1 | not DE   | not DE   | not DE   | not DE  |
| EVM0008371 | LG1 | hypothetical protein CICLE_v1 | not DE   | not DE   | not DE   | not DE  |
| EVM0019566 | LG1 | hypothetical protein CICLE_v1 | not DE   | not DE   | not DE   | not DE  |
| EVM0000451 | LG1 | hypothetical protein CICLE_v1 | not DE   | not DE   | not DE   | not DE  |
| EVM0024403 | LG1 | hypothetical protein CICLE_v1 | not DE   | not DE   | not DE   | not DE  |
| EVM0016420 | LG1 | hypothetical protein CICLE_v1 | not DE   | not DE   | not DE   | not DE  |
| EVM0018687 | LG1 | hypothetical protein CICLE_v1 | not DE   | not DE   | not DE   | not DE  |
| EVM0018307 | LG1 | hypothetical protein CICLE_v1 | not DE   | not DE   | not DE   | not DE  |
| EVM0015923 | LG1 | hypothetical protein CICLE_v1 | not DE   | not DE   | not DE   | not DE  |
| EVM0003790 | LG1 | hypothetical protein CICLE_v1 | not DE   | not DE   | not DE   | not DE  |
| EVM0007228 | LG1 | hypothetical protein CICLE_v1 | not DE   | not DE   | not DE   | not DE  |
| EVM0022224 | LG1 | hypothetical protein CICLE_v1 | not DE   | not DE   | not DE   | not DE  |
| EVM0012862 | LG1 | hypothetical protein CICLE_v1 | 1.601566 | 0.02758  | 1.215152 | 0.00787 |
| EVM0006405 | LG1 | hypothetical protein CICLE_v1 | not DE   | not DE   | not DE   | not DE  |
| EVM0019216 | LG1 | hypothetical protein CICLE_v1 | not DE   | not DE   | not DE   | not DE  |
| EVM0003772 | LG1 | hypothetical protein CICLE_v1 | not DE   | not DE   | not DE   | not DE  |
| EVM0019931 | LG1 | hypothetical protein CICLE_v1 | not DE   | not DE   | not DE   | not DE  |
| EVM0019336 | LG1 | hypothetical protein CICLE_v1 | not DE   | not DE   | not DE   | not DE  |
| EVM0001794 | LG1 | hypothetical protein CICLE_v1 | not DE   | not DE   | not DE   | not DE  |
| EVM0008061 | LG1 | hypothetical protein CICLE_v1 | not DE   | not DE   | not DE   | not DE  |
| EVM0014548 | LG1 | hypothetical protein CICLE_v1 | not DE   | not DE   | not DE   | not DE  |
| EVM0012992 | LG1 | hypothetical protein CICLE_v1 | not DE   | not DE   | not DE   | not DE  |
| EVM0022928 | LG1 | hypothetical protein CICLE_v1 | not DE   | not DE   | not DE   | not DE  |
| EVM0000209 | LG1 | hypothetical protein CICLE_v1 | not DE   | not DE   | not DE   | not DE  |
| EVM0005954 | LG1 | hypothetical protein CICLE_v1 | not DE   | not DE   | not DE   | not DE  |
| EVM0000947 | LG1 | hypothetical protein CICLE_v1 | not DE   | not DE   | not DE   | not DE  |
| EVM0002258 | LG1 | hypothetical protein CICLE_v1 | not DE   | not DE   | not DE   | not DE  |
| EVM0011701 | LG1 | hypothetical protein CICLE_v1 | not DE   | not DE   | not DE   | not DE  |
| EVM0008882 | LG1 | hypothetical protein CICLE_v1 | not DE   | not DE   | not DE   | not DE  |

|            |     |                               |          |          |          |         |
|------------|-----|-------------------------------|----------|----------|----------|---------|
| EVM0020091 | LG1 | hypothetical protein CICLE_v1 | not DE   | not DE   | not DE   | not DE  |
| EVM0010937 | LG1 | hypothetical protein CICLE_v1 | not DE   | not DE   | not DE   | not DE  |
| EVM0010489 | LG1 | hypothetical protein CICLE_v1 | not DE   | not DE   | 1.207982 | 0.0419  |
| EVM0023461 | LG1 | hypothetical protein CICLE_v1 | not DE   | not DE   | not DE   | not DE  |
| EVM0007746 | LG1 | hypothetical protein CICLE_v1 | not DE   | not DE   | not DE   | not DE  |
| EVM0017180 | LG1 | hypothetical protein CICLE_v1 | 2.495441 | 0.001004 | 1.352665 | 0.03371 |
| EVM0008311 | LG1 | hypothetical protein CICLE_v1 | not DE   | not DE   | not DE   | not DE  |
| EVM0018755 | LG1 | hypothetical protein CICLE_v1 | 1.457616 | 0.049242 | not DE   | not DE  |
| EVM0020172 | LG1 | hypothetical protein CICLE_v1 | not DE   | not DE   | not DE   | not DE  |
| EVM0020856 | LG1 | hypothetical protein CICLE_v1 | not DE   | not DE   | not DE   | not DE  |
| EVM0014997 | LG1 | hypothetical protein CICLE_v1 | not DE   | not DE   | not DE   | not DE  |
| EVM0023486 | LG1 | hypothetical protein CICLE_v1 | not DE   | not DE   | not DE   | not DE  |
| EVM0001959 | LG1 | hypothetical protein CICLE_v1 | 1.280495 | 0.031889 | not DE   | not DE  |
| EVM0014072 | LG1 | hypothetical protein CICLE_v1 | not DE   | not DE   | not DE   | not DE  |
| EVM0006727 | LG1 | hypothetical protein CICLE_v1 | not DE   | not DE   | not DE   | not DE  |
| EVM0018946 | LG1 | hypothetical protein CICLE_v1 | not DE   | not DE   | not DE   | not DE  |
| EVM0005967 | LG1 | hypothetical protein CICLE_v1 | not DE   | not DE   | not DE   | not DE  |
| EVM0009817 | LG1 | hypothetical protein CICLE_v1 | not DE   | not DE   | not DE   | not DE  |
| EVM0013021 | LG1 | hypothetical protein CICLE_v1 | not DE   | not DE   | not DE   | not DE  |
| EVM0000242 | LG1 | hypothetical protein CICLE_v1 | not DE   | not DE   | not DE   | not DE  |
| EVM0022398 | LG1 | hypothetical protein CICLE_v1 | not DE   | not DE   | not DE   | not DE  |
| EVM0022337 | LG1 | hypothetical protein CICLE_v1 | not DE   | not DE   | not DE   | not DE  |
| EVM0007259 | LG1 | hypothetical protein CICLE_v1 | not DE   | not DE   | not DE   | not DE  |
| EVM0012721 | LG1 | hypothetical protein CICLE_v1 | not DE   | not DE   | not DE   | not DE  |
| EVM0020876 | LG1 | hypothetical protein CICLE_v1 | not DE   | not DE   | not DE   | not DE  |
| EVM0023673 | LG1 | hypothetical protein CICLE_v1 | not DE   | not DE   | not DE   | not DE  |
| EVM0001821 | LG1 | hypothetical protein CICLE_v1 | not DE   | not DE   | not DE   | not DE  |
| EVM0004894 | LG1 | hypothetical protein CICLE_v1 | not DE   | not DE   | not DE   | not DE  |
| EVM0018966 | LG1 | hypothetical protein CICLE_v1 | not DE   | not DE   | not DE   | not DE  |
| EVM0001265 | LG1 | hypothetical protein CICLE_v1 | not DE   | not DE   | not DE   | not DE  |
| EVM0000284 | LG1 | hypothetical protein CICLE_v1 | not DE   | not DE   | not DE   | not DE  |
| EVM0006072 | LG1 | hypothetical protein CICLE_v1 | not DE   | not DE   | not DE   | not DE  |
| EVM0020289 | LG1 | hypothetical protein CICLE_v1 | not DE   | not DE   | not DE   | not DE  |
| EVM0005521 | LG1 | hypothetical protein CICLE_v1 | not DE   | not DE   | not DE   | not DE  |
| EVM0001885 | LG1 | hypothetical protein CICLE_v1 | not DE   | not DE   | not DE   | not DE  |
| EVM0002585 | LG1 | hypothetical protein CICLE_v1 | not DE   | not DE   | not DE   | not DE  |
| EVM0023529 | LG1 | hypothetical protein CICLE_v1 | not DE   | not DE   | not DE   | not DE  |
| EVM0012387 | LG1 | hypothetical protein CICLE_v1 | 2.875416 | 5.62E-09 | not DE   | not DE  |
| EVM0004012 | LG1 | hypothetical protein CICLE_v1 | not DE   | not DE   | 1.110368 | 0.00014 |
| EVM0002390 | LG1 | hypothetical protein CICLE_v1 | not DE   | not DE   | not DE   | not DE  |
| EVM0011189 | LG1 | hypothetical protein CICLE_v1 | not DE   | not DE   | not DE   | not DE  |
| EVM0024027 | LG1 | hypothetical protein CICLE_v1 | not DE   | not DE   | not DE   | not DE  |
| EVM0007766 | LG1 | hypothetical protein CICLE_v1 | not DE   | not DE   | not DE   | not DE  |
| EVM0006577 | LG1 | hypothetical protein CICLE_v1 | not DE   | not DE   | not DE   | not DE  |
| EVM0020909 | LG1 | hypothetical protein CICLE_v1 | not DE   | not DE   | not DE   | not DE  |
| EVM0023958 | LG1 | hypothetical protein CICLE_v1 | not DE   | not DE   | not DE   | not DE  |
| EVM0019526 | LG1 | hypothetical protein CICLE_v1 | not DE   | not DE   | not DE   | not DE  |
| EVM0005527 | LG1 | hypothetical protein CICLE_v1 | not DE   | not DE   | not DE   | not DE  |
| EVM0012606 | LG1 | hypothetical protein CICLE_v1 | not DE   | not DE   | not DE   | not DE  |
| EVM0018198 | LG1 | hypothetical protein CICLE_v1 | not DE   | not DE   | not DE   | not DE  |
| EVM0007557 | LG1 | hypothetical protein CICLE_v1 | not DE   | not DE   | not DE   | not DE  |
| EVM0013914 | LG1 | hypothetical protein CICLE_v1 | not DE   | not DE   | not DE   | not DE  |
| EVM0015462 | LG1 | hypothetical protein CICLE_v1 | not DE   | not DE   | not DE   | not DE  |
| EVM0007758 | LG1 | hypothetical protein CICLE_v1 | not DE   | not DE   | not DE   | not DE  |

|            |     |                               |          |          |          |         |
|------------|-----|-------------------------------|----------|----------|----------|---------|
| EVM0021763 | LG1 | hypothetical protein CICLE_v1 | not DE   | not DE   | not DE   | not DE  |
| EVM0005486 | LG1 | hypothetical protein CICLE_v1 | not DE   | not DE   | not DE   | not DE  |
| EVM0018136 | LG1 | hypothetical protein CICLE_v1 | not DE   | not DE   | not DE   | not DE  |
| EVM0007919 | LG1 | hypothetical protein CICLE_v1 | not DE   | not DE   | not DE   | not DE  |
| EVM0014751 | LG1 | hypothetical protein CICLE_v1 | not DE   | not DE   | not DE   | not DE  |
| EVM0000884 | LG1 | hypothetical protein CICLE_v1 | not DE   | not DE   | not DE   | not DE  |
| EVM0013932 | LG1 | hypothetical protein CICLE_v1 | not DE   | not DE   | not DE   | not DE  |
| EVM0003325 | LG1 | hypothetical protein CICLE_v1 | not DE   | not DE   | not DE   | not DE  |
| EVM0001387 | LG1 | hypothetical protein CICLE_v1 | not DE   | not DE   | not DE   | not DE  |
| EVM0019283 | LG1 | hypothetical protein CICLE_v1 | not DE   | not DE   | not DE   | not DE  |
| EVM0004451 | LG1 | hypothetical protein CICLE_v1 | not DE   | not DE   | not DE   | not DE  |
| EVM0008753 | LG1 | hypothetical protein CICLE_v1 | not DE   | not DE   | not DE   | not DE  |
| EVM0011807 | LG1 | hypothetical protein CICLE_v1 | -1.38096 | 0.044575 | not DE   | not DE  |
| EVM0007580 | LG1 | hypothetical protein CICLE_v1 | not DE   | not DE   | not DE   | not DE  |
| EVM0008272 | LG1 | hypothetical protein CICLE_v1 | not DE   | not DE   | not DE   | not DE  |
| EVM0004437 | LG1 | hypothetical protein CICLE_v1 | not DE   | not DE   | not DE   | not DE  |
| EVM0013572 | LG1 | hypothetical protein CICLE_v1 | not DE   | not DE   | -1.39354 | 0.03972 |
| EVM0022190 | LG1 | hypothetical protein CICLE_v1 | not DE   | not DE   | not DE   | not DE  |
| EVM0016144 | LG1 | hypothetical protein CICLE_v1 | not DE   | not DE   | not DE   | not DE  |
| EVM0016496 | LG1 | hypothetical protein CICLE_v1 | not DE   | not DE   | not DE   | not DE  |
| EVM0019785 | LG1 | hypothetical protein CICLE_v1 | not DE   | not DE   | not DE   | not DE  |
| EVM0013982 | LG1 | hypothetical protein CICLE_v1 | -1.0941  | 0.019691 | not DE   | not DE  |
| EVM0020176 | LG1 | hypothetical protein CICLE_v1 | not DE   | not DE   | not DE   | not DE  |
| EVM0018038 | LG1 | hypothetical protein CICLE_v1 | -1.37232 | 0.043697 | not DE   | not DE  |
| EVM0002039 | LG1 | hypothetical protein CICLE_v1 | not DE   | not DE   | not DE   | not DE  |
| EVM0020626 | LG1 | hypothetical protein CICLE_v1 | not DE   | not DE   | not DE   | not DE  |
| EVM0022449 | LG1 | hypothetical protein CICLE_v1 | not DE   | not DE   | not DE   | not DE  |
| EVM0001933 | LG1 | hypothetical protein CICLE_v1 | not DE   | not DE   | not DE   | not DE  |
| EVM0014093 | LG1 | hypothetical protein CICLE_v1 | not DE   | not DE   | not DE   | not DE  |
| EVM0006812 | LG1 | hypothetical protein CICLE_v1 | not DE   | not DE   | not DE   | not DE  |
| EVM0006329 | LG1 | hypothetical protein CICLE_v1 | not DE   | not DE   | 1.362662 | 0.00146 |
| EVM0009160 | LG1 | hypothetical protein CICLE_v1 | not DE   | not DE   | not DE   | not DE  |
| EVM0002874 | LG1 | hypothetical protein CICLE_v1 | not DE   | not DE   | not DE   | not DE  |
| EVM0000669 | LG1 | hypothetical protein CICLE_v1 | not DE   | not DE   | not DE   | not DE  |
| EVM0024482 | LG1 | hypothetical protein CICLE_v1 | not DE   | not DE   | 1.058413 | 0.01921 |
| EVM0012515 | LG1 | hypothetical protein CICLE_v1 | not DE   | not DE   | not DE   | not DE  |
| EVM0001977 | LG1 | hypothetical protein CICLE_v1 | not DE   | not DE   | not DE   | not DE  |
| EVM0010301 | LG1 | hypothetical protein CICLE_v1 | not DE   | not DE   | not DE   | not DE  |
| EVM0002143 | LG1 | hypothetical protein CICLE_v1 | not DE   | not DE   | not DE   | not DE  |
| EVM0003903 | LG1 | hypothetical protein CICLE_v1 | not DE   | not DE   | not DE   | not DE  |
| EVM0017316 | LG1 | hypothetical protein CICLE_v1 | not DE   | not DE   | not DE   | not DE  |
| EVM0000010 | LG1 | hypothetical protein CICLE_v1 | not DE   | not DE   | not DE   | not DE  |
| EVM0005947 | LG1 | hypothetical protein CICLE_v1 | not DE   | not DE   | not DE   | not DE  |
| EVM0020259 | LG1 | hypothetical protein CICLE_v1 | not DE   | not DE   | not DE   | not DE  |
| EVM0020043 | LG1 | hypothetical protein CICLE_v1 | not DE   | not DE   | not DE   | not DE  |
| EVM0021932 | LG1 | hypothetical protein CICLE_v1 | not DE   | not DE   | not DE   | not DE  |
| EVM0013954 | LG1 | hypothetical protein CICLE_v1 | not DE   | not DE   | 3.340713 | 0.04476 |
| EVM0015058 | LG1 | hypothetical protein CICLE_v1 | not DE   | not DE   | not DE   | not DE  |
| EVM0024263 | LG1 | hypothetical protein CICLE_v1 | not DE   | not DE   | not DE   | not DE  |
| EVM0024267 | LG1 | hypothetical protein CICLE_v1 | not DE   | not DE   | not DE   | not DE  |
| EVM0005946 | LG1 | hypothetical protein CICLE_v1 | not DE   | not DE   | not DE   | not DE  |
| EVM0017668 | LG1 | hypothetical protein CICLE_v1 | not DE   | not DE   | not DE   | not DE  |
| EVM0007133 | LG1 | hypothetical protein CICLE_v1 | not DE   | not DE   | not DE   | not DE  |
| EVM0019341 | LG1 | hypothetical protein CICLE_v1 | not DE   | not DE   | not DE   | not DE  |

|            |     |                               |          |          |          |         |
|------------|-----|-------------------------------|----------|----------|----------|---------|
| EVM0002998 | LG1 | hypothetical protein CICLE_v1 | not DE   | not DE   | 1.200975 | #####   |
| EVM0017301 | LG1 | hypothetical protein CICLE_v1 | not DE   | not DE   | not DE   | not DE  |
| EVM0014338 | LG1 | hypothetical protein CICLE_v1 | not DE   | not DE   | not DE   | not DE  |
| EVM0023316 | LG1 | hypothetical protein CICLE_v1 | -2.18442 | 0.005209 | not DE   | not DE  |
| EVM0005404 | LG1 | hypothetical protein CICLE_v1 | not DE   | not DE   | not DE   | not DE  |
| EVM0012778 | LG1 | hypothetical protein CICLE_v1 | not DE   | not DE   | not DE   | not DE  |
| EVM0020889 | LG1 | hypothetical protein CICLE_v1 | not DE   | not DE   | not DE   | not DE  |
| EVM0000197 | LG1 | hypothetical protein CICLE_v1 | not DE   | not DE   | not DE   | not DE  |
| EVM0024464 | LG1 | hypothetical protein CICLE_v1 | not DE   | not DE   | not DE   | not DE  |
| EVM0011327 | LG1 | hypothetical protein CICLE_v1 | not DE   | not DE   | not DE   | not DE  |
| EVM0020345 | LG1 | hypothetical protein CICLE_v1 | not DE   | not DE   | not DE   | not DE  |
| EVM0008171 | LG1 | hypothetical protein CICLE_v1 | not DE   | not DE   | not DE   | not DE  |
| EVM0004783 | LG1 | hypothetical protein CICLE_v1 | not DE   | not DE   | not DE   | not DE  |
| EVM0021559 | LG1 | hypothetical protein CICLE_v1 | not DE   | not DE   | not DE   | not DE  |
| EVM0018820 | LG1 | hypothetical protein CICLE_v1 | not DE   | not DE   | 1.042891 | 0.00337 |
| EVM0009835 | LG1 | hypothetical protein CICLE_v1 | not DE   | not DE   | 1.610521 | 0.0353  |
| EVM0005015 | LG1 | hypothetical protein CICLE_v1 | not DE   | not DE   | not DE   | not DE  |
| EVM0009499 | LG1 | hypothetical protein CICLE_v1 | not DE   | not DE   | not DE   | not DE  |
| EVM0024623 | LG1 | hypothetical protein CICLE_v1 | not DE   | not DE   | 1.103836 | #####   |
| EVM0010313 | LG1 | hypothetical protein CICLE_v1 | not DE   | not DE   | not DE   | not DE  |
| EVM0014340 | LG1 | hypothetical protein CICLE_v1 | not DE   | not DE   | not DE   | not DE  |
| EVM0022094 | LG1 | hypothetical protein CICLE_v1 | 1.16483  | 0.037681 | 2.037317 | #####   |
| EVM0023240 | LG1 | hypothetical protein CICLE_v1 | not DE   | not DE   | not DE   | not DE  |
| EVM0005877 | LG1 | hypothetical protein CICLE_v1 | 6.784915 | 0.002232 | not DE   | not DE  |
| EVM0011086 | LG1 | hypothetical protein CICLE_v1 | not DE   | not DE   | not DE   | not DE  |
| EVM0004549 | LG1 | hypothetical protein CICLE_v1 | not DE   | not DE   | not DE   | not DE  |
| EVM0019784 | LG1 | hypothetical protein CICLE_v1 | not DE   | not DE   | not DE   | not DE  |
| EVM0007312 | LG1 | hypothetical protein CICLE_v1 | not DE   | not DE   | not DE   | not DE  |
| EVM0009573 | LG1 | hypothetical protein CICLE_v1 | not DE   | not DE   | not DE   | not DE  |
| EVM0003070 | LG1 | hypothetical protein CICLE_v1 | not DE   | not DE   | not DE   | not DE  |
| EVM0016966 | LG1 | hypothetical protein CICLE_v1 | not DE   | not DE   | not DE   | not DE  |
| EVM0014071 | LG1 | hypothetical protein CICLE_v1 | not DE   | not DE   | 2.213824 | #####   |
| EVM0011652 | LG1 | hypothetical protein CICLE_v1 | not DE   | not DE   | not DE   | not DE  |
| EVM0014550 | LG1 | hypothetical protein CICLE_v1 | not DE   | not DE   | not DE   | not DE  |
| EVM0019898 | LG1 | hypothetical protein CICLE_v1 | not DE   | not DE   | not DE   | not DE  |
| EVM0022693 | LG1 | hypothetical protein CICLE_v1 | not DE   | not DE   | not DE   | not DE  |
| EVM0023994 | LG1 | hypothetical protein CICLE_v1 | not DE   | not DE   | not DE   | not DE  |
| EVM0022902 | LG1 | hypothetical protein CICLE_v1 | not DE   | not DE   | not DE   | not DE  |
| EVM0015476 | LG1 | hypothetical protein CICLE_v1 | not DE   | not DE   | not DE   | not DE  |
| EVM0011796 | LG1 | hypothetical protein CICLE_v1 | not DE   | not DE   | not DE   | not DE  |
| EVM0000998 | LG1 | hypothetical protein CICLE_v1 | not DE   | not DE   | not DE   | not DE  |
| EVM0009149 | LG1 | hypothetical protein CICLE_v1 | not DE   | not DE   | not DE   | not DE  |
| EVM0016196 | LG1 | hypothetical protein CICLE_v1 | not DE   | not DE   | not DE   | not DE  |
| EVM0006996 | LG1 | hypothetical protein CICLE_v1 | not DE   | not DE   | not DE   | not DE  |
| EVM0009047 | LG1 | hypothetical protein CICLE_v1 | not DE   | not DE   | not DE   | not DE  |
| EVM0015773 | LG1 | hypothetical protein CICLE_v1 | not DE   | not DE   | not DE   | not DE  |
| EVM0023314 | LG1 | hypothetical protein CICLE_v1 | not DE   | not DE   | not DE   | not DE  |
| EVM0009700 | LG1 | hypothetical protein CICLE_v1 | not DE   | not DE   | not DE   | not DE  |
| EVM0013631 | LG1 | hypothetical protein CICLE_v1 | not DE   | not DE   | not DE   | not DE  |
| EVM0006356 | LG1 | hypothetical protein CICLE_v1 | not DE   | not DE   | not DE   | not DE  |
| EVM0013950 | LG1 | hypothetical protein CICLE_v1 | not DE   | not DE   | not DE   | not DE  |
| EVM0020658 | LG1 | hypothetical protein CICLE_v1 | not DE   | not DE   | not DE   | not DE  |
| EVM0005256 | LG1 | hypothetical protein CICLE_v1 | not DE   | not DE   | not DE   | not DE  |
| EVM0009561 | LG1 | hypothetical protein CICLE_v1 | not DE   | not DE   | not DE   | not DE  |



|            |     |                               |          |          |          |         |
|------------|-----|-------------------------------|----------|----------|----------|---------|
| EVM0021304 | LG1 | hypothetical protein CICLE_v1 | -2.16547 | 0.011678 | not DE   | not DE  |
| EVM0008160 | LG1 | hypothetical protein CICLE_v1 | not DE   | not DE   | not DE   | not DE  |
| EVM0020201 | LG1 | hypothetical protein CICLE_v1 | not DE   | not DE   | not DE   | not DE  |
| EVM0005824 | LG1 | hypothetical protein CICLE_v1 | not DE   | not DE   | not DE   | not DE  |
| EVM0023051 | LG1 | hypothetical protein CICLE_v1 | not DE   | not DE   | not DE   | not DE  |
| EVM0008690 | LG1 | hypothetical protein CICLE_v1 | not DE   | not DE   | not DE   | not DE  |
| EVM0016223 | LG1 | hypothetical protein CICLE_v1 | not DE   | not DE   | not DE   | not DE  |
| EVM0000590 | LG1 | hypothetical protein CICLE_v1 | not DE   | not DE   | 1.621993 | 0.00032 |
| EVM0015305 | LG1 | hypothetical protein CICLE_v1 | 1.112544 | 0.018319 | not DE   | not DE  |
| EVM0013789 | LG1 | hypothetical protein CICLE_v1 | not DE   | not DE   | not DE   | not DE  |
| EVM0011152 | LG1 | hypothetical protein CICLE_v1 | 2.880888 | 1.62E-05 | not DE   | not DE  |
| EVM0018073 | LG1 | hypothetical protein CICLE_v1 | not DE   | not DE   | not DE   | not DE  |
| EVM0015551 | LG1 | hypothetical protein CICLE_v1 | not DE   | not DE   | not DE   | not DE  |
| EVM0019667 | LG1 | hypothetical protein CICLE_v1 | not DE   | not DE   | not DE   | not DE  |
| EVM0010723 | LG1 | hypothetical protein CICLE_v1 | not DE   | not DE   | not DE   | not DE  |
| EVM0007099 | LG1 | hypothetical protein CICLE_v1 | not DE   | not DE   | not DE   | not DE  |
| EVM0024179 | LG1 | hypothetical protein CICLE_v1 | not DE   | not DE   | not DE   | not DE  |
| EVM0005628 | LG1 | hypothetical protein CICLE_v1 | not DE   | not DE   | not DE   | not DE  |
| EVM0012116 | LG1 | hypothetical protein CICLE_v1 | not DE   | not DE   | not DE   | not DE  |
| EVM0000621 | LG1 | hypothetical protein CICLE_v1 | not DE   | not DE   | not DE   | not DE  |
| EVM0024557 | LG1 | hypothetical protein CICLE_v1 | -2.79095 | 9.57E-05 | not DE   | not DE  |
| EVM0016191 | LG1 | hypothetical protein CICLE_v1 | 1.624676 | 0.00681  | not DE   | not DE  |
| EVM0014151 | LG1 | hypothetical protein CICLE_v1 | not DE   | not DE   | not DE   | not DE  |
| EVM0010861 | LG1 | hypothetical protein CICLE_v1 | not DE   | not DE   | not DE   | not DE  |
| EVM0021457 | LG1 | hypothetical protein CICLE_v1 | not DE   | not DE   | not DE   | not DE  |
| EVM0000649 | LG1 | hypothetical protein CICLE_v1 | not DE   | not DE   | not DE   | not DE  |
| EVM0017786 | LG1 | hypothetical protein CICLE_v1 | not DE   | not DE   | not DE   | not DE  |
| EVM0019556 | LG1 | hypothetical protein CICLE_v1 | not DE   | not DE   | not DE   | not DE  |
| EVM0008986 | LG1 | hypothetical protein CICLE_v1 | not DE   | not DE   | not DE   | not DE  |
| EVM0014551 | LG1 | hypothetical protein CICLE_v1 | not DE   | not DE   | not DE   | not DE  |
| EVM0012315 | LG1 | hypothetical protein CICLE_v1 | 1.534979 | 0.016091 | not DE   | not DE  |
| EVM0000541 | LG1 | hypothetical protein CICLE_v1 | not DE   | not DE   | not DE   | not DE  |
| EVM0014472 | LG1 | hypothetical protein CICLE_v1 | not DE   | not DE   | not DE   | not DE  |
| EVM0015353 | LG1 | hypothetical protein CICLE_v1 | not DE   | not DE   | not DE   | not DE  |
| EVM0014557 | LG1 | hypothetical protein CICLE_v1 | not DE   | not DE   | not DE   | not DE  |
| EVM0010878 | LG1 | hypothetical protein CICLE_v1 | not DE   | not DE   | not DE   | not DE  |
| EVM0014463 | LG1 | hypothetical protein CICLE_v1 | not DE   | not DE   | not DE   | not DE  |
| EVM0011568 | LG1 | hypothetical protein CICLE_v1 | not DE   | not DE   | not DE   | not DE  |
| EVM0001381 | LG1 | hypothetical protein CICLE_v1 | not DE   | not DE   | not DE   | not DE  |
| EVM0011337 | LG1 | hypothetical protein CICLE_v1 | -1.1361  | 0.046888 | -1.69997 | #####   |
| EVM0010297 | LG1 | hypothetical protein CICLE_v1 | not DE   | not DE   | not DE   | not DE  |
| EVM0008496 | LG1 | hypothetical protein CICLE_v1 | not DE   | not DE   | not DE   | not DE  |
| EVM0012766 | LG1 | hypothetical protein CICLE_v1 | not DE   | not DE   | not DE   | not DE  |
| EVM0005671 | LG1 | hypothetical protein CICLE_v1 | not DE   | not DE   | not DE   | not DE  |
| EVM0017491 | LG1 | hypothetical protein CICLE_v1 | not DE   | not DE   | not DE   | not DE  |
| EVM0006839 | LG1 | hypothetical protein CICLE_v1 | not DE   | not DE   | not DE   | not DE  |
| EVM0007154 | LG1 | hypothetical protein CICLE_v1 | not DE   | not DE   | not DE   | not DE  |
| EVM0010721 | LG1 | hypothetical protein CICLE_v1 | not DE   | not DE   | not DE   | not DE  |
| EVM0023422 | LG1 | hypothetical protein CICLE_v1 | not DE   | not DE   | not DE   | not DE  |
| EVM0001014 | LG1 | hypothetical protein CICLE_v1 | not DE   | not DE   | not DE   | not DE  |
| EVM0011827 | LG1 | hypothetical protein CICLE_v1 | not DE   | not DE   | not DE   | not DE  |
| EVM0011600 | LG1 | hypothetical protein CICLE_v1 | not DE   | not DE   | not DE   | not DE  |
| EVM0020726 | LG1 | hypothetical protein CICLE_v1 | not DE   | not DE   | not DE   | not DE  |
| EVM0010749 | LG1 | hypothetical protein CICLE_v1 | not DE   | not DE   | not DE   | not DE  |

|            |     |                               |          |          |          |         |
|------------|-----|-------------------------------|----------|----------|----------|---------|
| EVM0022798 | LG1 | hypothetical protein CICLE_v1 | -1.87383 | 5.14E-05 | not DE   | not DE  |
| EVM0017338 | LG1 | hypothetical protein CICLE_v1 | not DE   | not DE   | not DE   | not DE  |
| EVM0015986 | LG1 | hypothetical protein CICLE_v1 | 4.39456  | 1.27E-05 | not DE   | not DE  |
| EVM0005880 | LG1 | hypothetical protein CICLE_v1 | not DE   | not DE   | not DE   | not DE  |
| EVM0016540 | LG1 | hypothetical protein CICLE_v1 | not DE   | not DE   | not DE   | not DE  |
| EVM0003882 | LG1 | hypothetical protein CICLE_v1 | 2.237841 | 0.00801  | not DE   | not DE  |
| EVM0008954 | LG1 | hypothetical protein CICLE_v1 | not DE   | not DE   | not DE   | not DE  |
| EVM0018415 | LG1 | hypothetical protein CICLE_v1 | not DE   | not DE   | not DE   | not DE  |
| EVM0006233 | LG1 | hypothetical protein CICLE_v1 | not DE   | not DE   | not DE   | not DE  |
| EVM0012290 | LG1 | hypothetical protein CICLE_v1 | not DE   | not DE   | not DE   | not DE  |
| EVM0015335 | LG1 | hypothetical protein CICLE_v1 | not DE   | not DE   | not DE   | not DE  |
| EVM0002882 | LG1 | hypothetical protein CICLE_v1 | not DE   | not DE   | not DE   | not DE  |
| EVM0018520 | LG1 | hypothetical protein CICLE_v1 | not DE   | not DE   | not DE   | not DE  |
| EVM0006949 | LG1 | hypothetical protein CICLE_v1 | not DE   | not DE   | not DE   | not DE  |
| EVM0007241 | LG1 | hypothetical protein CICLE_v1 | not DE   | not DE   | not DE   | not DE  |
| EVM0024622 | LG1 | hypothetical protein CICLE_v1 | not DE   | not DE   | not DE   | not DE  |
| EVM0015779 | LG1 | hypothetical protein CICLE_v1 | not DE   | not DE   | not DE   | not DE  |
| EVM0009900 | LG1 | hypothetical protein CICLE_v1 | not DE   | not DE   | not DE   | not DE  |
| EVM0008315 | LG1 | hypothetical protein CICLE_v1 | not DE   | not DE   | not DE   | not DE  |
| EVM0016847 | LG1 | hypothetical protein CICLE_v1 | not DE   | not DE   | 1.177988 | 0.00053 |
| EVM0020428 | LG1 | hypothetical protein CICLE_v1 | not DE   | not DE   | not DE   | not DE  |
| EVM0005192 | LG1 | hypothetical protein CICLE_v1 | not DE   | not DE   | not DE   | not DE  |
| EVM0020247 | LG1 | hypothetical protein CICLE_v1 | not DE   | not DE   | not DE   | not DE  |
| EVM0011371 | LG1 | hypothetical protein CICLE_v1 | not DE   | not DE   | not DE   | not DE  |
| EVM0016669 | LG1 | hypothetical protein CICLE_v1 | not DE   | not DE   | not DE   | not DE  |
| EVM0019062 | LG1 | hypothetical protein CICLE_v1 | not DE   | not DE   | not DE   | not DE  |
| EVM0003192 | LG1 | hypothetical protein CICLE_v1 | not DE   | not DE   | not DE   | not DE  |
| EVM0007929 | LG1 | hypothetical protein CICLE_v1 | not DE   | not DE   | not DE   | not DE  |
| EVM0011160 | LG1 | hypothetical protein CICLE_v1 | not DE   | not DE   | not DE   | not DE  |
| EVM0005630 | LG1 | hypothetical protein CICLE_v1 | not DE   | not DE   | not DE   | not DE  |
| EVM0014949 | LG1 | hypothetical protein CICLE_v1 | not DE   | not DE   | not DE   | not DE  |
| EVM0017708 | LG1 | hypothetical protein CICLE_v1 | not DE   | not DE   | not DE   | not DE  |
| EVM0013973 | LG1 | hypothetical protein CICLE_v1 | not DE   | not DE   | not DE   | not DE  |
| EVM0013953 | LG1 | hypothetical protein CICLE_v1 | not DE   | not DE   | not DE   | not DE  |
| EVM0018695 | LG1 | hypothetical protein CICLE_v1 | not DE   | not DE   | not DE   | not DE  |
| EVM0008711 | LG1 | hypothetical protein CICLE_v1 | not DE   | not DE   | not DE   | not DE  |
| EVM0000787 | LG1 | hypothetical protein CICLE_v1 | not DE   | not DE   | not DE   | not DE  |
| EVM0017172 | LG1 | hypothetical protein CICLE_v1 | not DE   | not DE   | not DE   | not DE  |
| EVM0004863 | LG1 | hypothetical protein CICLE_v1 | not DE   | not DE   | not DE   | not DE  |
| EVM0004521 | LG1 | hypothetical protein CICLE_v1 | not DE   | not DE   | not DE   | not DE  |
| EVM0003226 | LG1 | hypothetical protein CICLE_v1 | not DE   | not DE   | not DE   | not DE  |
| EVM0022138 | LG1 | hypothetical protein CISEN_1g | not DE   | not DE   | -1.03997 | 0.00172 |
| EVM0015274 | LG1 | hypothetical protein CISEN_1g | not DE   | not DE   | not DE   | not DE  |
| EVM0018615 | LG1 | hypothetical protein CISEN_1g | not DE   | not DE   | not DE   | not DE  |
| EVM0012392 | LG1 | hypothetical protein CISEN_1g | not DE   | not DE   | -1.04293 | 0.00146 |
| EVM0023241 | LG1 | hypothetical protein CISEN_1g | not DE   | not DE   | not DE   | not DE  |
| EVM0010523 | LG1 | hypothetical protein CISEN_1g | not DE   | not DE   | not DE   | not DE  |
| EVM0016506 | LG1 | hypothetical protein CISEN_1g | not DE   | not DE   | not DE   | not DE  |
| EVM0009594 | LG1 | hypothetical protein CISEN_1g | not DE   | not DE   | not DE   | not DE  |
| EVM0000540 | LG1 | hypothetical protein CISEN_1g | not DE   | not DE   | -1.0288  | 0.00524 |
| EVM0013937 | LG1 | hypothetical protein CISEN_1g | not DE   | not DE   | not DE   | not DE  |
| EVM0022950 | LG1 | hypothetical protein CISEN_1g | not DE   | not DE   | not DE   | not DE  |
| EVM0013780 | LG1 | hypothetical protein CISEN_1g | not DE   | not DE   | not DE   | not DE  |
| EVM0007047 | LG1 | hypothetical protein CISEN_1g | not DE   | not DE   | not DE   | not DE  |



|            |     |                               |          |          |          |         |
|------------|-----|-------------------------------|----------|----------|----------|---------|
| EVM0023440 | LG1 | hypothetical protein CISIN_1g | not DE   | not DE   | not DE   | not DE  |
| EVM0012755 | LG1 | hypothetical protein CISIN_1g | not DE   | not DE   | not DE   | not DE  |
| EVM0017279 | LG1 | hypothetical protein CISIN_1g | not DE   | not DE   | not DE   | not DE  |
| EVM0009993 | LG1 | hypothetical protein CISIN_1g | not DE   | not DE   | not DE   | not DE  |
| EVM0008897 | LG1 | hypothetical protein CISIN_1g | not DE   | not DE   | not DE   | not DE  |
| EVM0011752 | LG1 | hypothetical protein CISIN_1g | not DE   | not DE   | not DE   | not DE  |
| EVM0003147 | LG1 | hypothetical protein CISIN_1g | not DE   | not DE   | not DE   | not DE  |
| EVM0003596 | LG1 | hypothetical protein CISIN_1g | not DE   | not DE   | not DE   | not DE  |
| EVM0023624 | LG1 | hypothetical protein CISIN_1g | 2.005021 | 0.002353 | not DE   | not DE  |
| EVM0015874 | LG1 | hypothetical protein CISIN_1g | not DE   | not DE   | not DE   | not DE  |
| EVM0002531 | LG1 | hypothetical protein CISIN_1g | not DE   | not DE   | not DE   | not DE  |
| EVM0015780 | LG1 | hypothetical protein CISIN_1g | not DE   | not DE   | not DE   | not DE  |
| EVM0007383 | LG1 | hypothetical protein CISIN_1g | 1.813611 | 0.003268 | not DE   | not DE  |
| EVM0017061 | LG1 | hypothetical protein CISIN_1g | not DE   | not DE   | not DE   | not DE  |
| EVM0012017 | LG1 | hypothetical protein CISIN_1g | not DE   | not DE   | not DE   | not DE  |
| EVM0019778 | LG1 | hypothetical protein CISIN_1g | not DE   | not DE   | not DE   | not DE  |
| EVM0017422 | LG1 | hypothetical protein CISIN_1g | not DE   | not DE   | not DE   | not DE  |
| EVM0017437 | LG1 | hypothetical protein CISIN_1g | not DE   | not DE   | -1.47155 | 0.00047 |
| EVM0021536 | LG1 | hypothetical protein CISIN_1g | -1.51007 | 7.12E-05 | -1.62242 | #####   |
| EVM0001221 | LG1 | hypothetical protein CISIN_1g | not DE   | not DE   | not DE   | not DE  |
| EVM0024414 | LG1 | hypothetical protein CISIN_1g | not DE   | not DE   | not DE   | not DE  |
| EVM0012083 | LG1 | hypothetical protein CISIN_1g | not DE   | not DE   | not DE   | not DE  |
| EVM0006174 | LG1 | hypothetical protein CISIN_1g | 1.436331 | 0.000846 | not DE   | not DE  |
| EVM0001106 | LG1 | hypothetical protein CISIN_1g | not DE   | not DE   | not DE   | not DE  |
| EVM0015826 | LG1 | hypothetical protein CISIN_1g | not DE   | not DE   | not DE   | not DE  |
| EVM0007956 | LG1 | hypothetical protein CISIN_1g | not DE   | not DE   | not DE   | not DE  |
| EVM0010594 | LG1 | hypothetical protein CISIN_1g | not DE   | not DE   | not DE   | not DE  |
| EVM0011168 | LG1 | hypothetical protein CISIN_1g | not DE   | not DE   | not DE   | not DE  |
| EVM0007854 | LG1 | hypothetical protein CISIN_1g | not DE   | not DE   | not DE   | not DE  |
| EVM0002430 | LG1 | hypothetical protein CISIN_1g | not DE   | not DE   | not DE   | not DE  |
| EVM0004564 | LG1 | hypothetical protein CISIN_1g | not DE   | not DE   | not DE   | not DE  |
| EVM0013329 | LG1 | hypothetical protein CISIN_1g | not DE   | not DE   | not DE   | not DE  |
| EVM0018463 | LG1 | hypothetical protein CISIN_1g | not DE   | not DE   | not DE   | not DE  |
| EVM0003879 | LG1 | hypothetical protein CISIN_1g | not DE   | not DE   | not DE   | not DE  |
| EVM0002436 | LG1 | hypothetical protein CISIN_1g | not DE   | not DE   | not DE   | not DE  |
| EVM0011490 | LG1 | hypothetical protein CISIN_1g | not DE   | not DE   | not DE   | not DE  |
| EVM0023759 | LG1 | hypothetical protein CISIN_1g | not DE   | not DE   | not DE   | not DE  |
| EVM0011452 | LG1 | hypothetical protein CISIN_1g | not DE   | not DE   | not DE   | not DE  |
| EVM0020962 | LG1 | hypothetical protein CISIN_1g | not DE   | not DE   | not DE   | not DE  |
| EVM0021660 | LG1 | hypothetical protein CISIN_1g | 1.310297 | 4.78E-06 | not DE   | not DE  |
| EVM0009371 | LG1 | hypothetical protein CISIN_1g | not DE   | not DE   | not DE   | not DE  |
| EVM0023116 | LG1 | hypothetical protein CISIN_1g | not DE   | not DE   | not DE   | not DE  |
| EVM0022148 | LG1 | hypothetical protein CISIN_1g | not DE   | not DE   | not DE   | not DE  |
| EVM0021030 | LG1 | hypothetical protein CISIN_1g | not DE   | not DE   | not DE   | not DE  |
| EVM0021831 | LG1 | hypothetical protein CISIN_1g | not DE   | not DE   | not DE   | not DE  |
| EVM0016747 | LG1 | hypothetical protein CISIN_1g | not DE   | not DE   | not DE   | not DE  |
| EVM0016712 | LG1 | hypothetical protein CISIN_1g | not DE   | not DE   | not DE   | not DE  |
| EVM0007737 | LG1 | hypothetical protein CISIN_1g | not DE   | not DE   | not DE   | not DE  |
| EVM0010290 | LG1 | hypothetical protein CISIN_1g | not DE   | not DE   | not DE   | not DE  |
| EVM0013642 | LG1 | hypothetical protein CISIN_1g | not DE   | not DE   | not DE   | not DE  |
| EVM0023301 | LG1 | hypothetical protein CISIN_1g | not DE   | not DE   | not DE   | not DE  |
| EVM0008313 | LG1 | hypothetical protein CISIN_1g | not DE   | not DE   | not DE   | not DE  |
| EVM0005617 | LG1 | hypothetical protein CISIN_1g | not DE   | not DE   | not DE   | not DE  |
| EVM0015915 | LG1 | hypothetical protein CISIN_1g | not DE   | not DE   | not DE   | not DE  |

|            |     |                               |          |          |          |         |
|------------|-----|-------------------------------|----------|----------|----------|---------|
| EVM0013770 | LG1 | hypothetical protein CISIN_1g | not DE   | not DE   | not DE   | not DE  |
| EVM0009087 | LG1 | hypothetical protein CISIN_1g | not DE   | not DE   | not DE   | not DE  |
| EVM0010849 | LG1 | hypothetical protein CISIN_1g | not DE   | not DE   | not DE   | not DE  |
| EVM0021252 | LG1 | hypothetical protein CISIN_1g | not DE   | not DE   | not DE   | not DE  |
| EVM0012317 | LG1 | hypothetical protein CISIN_1g | not DE   | not DE   | not DE   | not DE  |
| EVM0018642 | LG1 | hypothetical protein CISIN_1g | not DE   | not DE   | not DE   | not DE  |
| EVM0000922 | LG1 | hypothetical protein CISIN_1g | not DE   | not DE   | not DE   | not DE  |
| EVM0016464 | LG1 | hypothetical protein CISIN_1g | not DE   | not DE   | not DE   | not DE  |
| EVM0015909 | LG1 | hypothetical protein CISIN_1g | not DE   | not DE   | not DE   | not DE  |
| EVM0009401 | LG1 | hypothetical protein CISIN_1g | not DE   | not DE   | not DE   | not DE  |
| EVM0002456 | LG1 | hypothetical protein CISIN_1g | not DE   | not DE   | not DE   | not DE  |
| EVM0021080 | LG1 | hypothetical protein CISIN_1g | not DE   | not DE   | not DE   | not DE  |
| EVM0018236 | LG1 | hypothetical protein CISIN_1g | not DE   | not DE   | not DE   | not DE  |
| EVM0005690 | LG1 | hypothetical protein CISIN_1g | not DE   | not DE   | -1.62796 | #####   |
| EVM0015601 | LG1 | hypothetical protein CISIN_1g | not DE   | not DE   | 1.182244 | 0.04546 |
| EVM0017725 | LG1 | hypothetical protein CISIN_1g | not DE   | not DE   | not DE   | not DE  |
| EVM0011560 | LG1 | hypothetical protein CISIN_1g | not DE   | not DE   | not DE   | not DE  |
| EVM0004396 | LG1 | hypothetical protein CISIN_1g | not DE   | not DE   | not DE   | not DE  |
| EVM0009618 | LG1 | hypothetical protein CISIN_1g | not DE   | not DE   | not DE   | not DE  |
| EVM0012870 | LG1 | hypothetical protein CISIN_1g | not DE   | not DE   | not DE   | not DE  |
| EVM0002880 | LG1 | hypothetical protein CISIN_1g | -1.17724 | 0.004546 | not DE   | not DE  |
| EVM0005537 | LG1 | hypothetical protein CISIN_1g | not DE   | not DE   | not DE   | not DE  |
| EVM0015604 | LG1 | hypothetical protein CISIN_1g | not DE   | not DE   | not DE   | not DE  |
| EVM0007212 | LG1 | hypothetical protein CISIN_1g | not DE   | not DE   | not DE   | not DE  |
| EVM0017648 | LG1 | hypothetical protein CISIN_1g | not DE   | not DE   | not DE   | not DE  |
| EVM0015144 | LG1 | hypothetical protein CISIN_1g | not DE   | not DE   | not DE   | not DE  |
| EVM0012157 | LG1 | hypothetical protein CISIN_1g | not DE   | not DE   | not DE   | not DE  |
| EVM0002472 | LG1 | hypothetical protein CISIN_1g | 1.112879 | 0.005885 | not DE   | not DE  |
| EVM0020375 | LG1 | hypothetical protein CISIN_1g | not DE   | not DE   | not DE   | not DE  |
| EVM0007588 | LG1 | hypothetical protein CISIN_1g | not DE   | not DE   | not DE   | not DE  |
| EVM0018889 | LG1 | hypothetical protein CISIN_1g | not DE   | not DE   | not DE   | not DE  |
| EVM0013662 | LG1 | hypothetical protein CISIN_1g | not DE   | not DE   | not DE   | not DE  |
| EVM0017108 | LG1 | hypothetical protein CISIN_1g | not DE   | not DE   | not DE   | not DE  |
| EVM0004813 | LG1 | hypothetical protein CISIN_1g | not DE   | not DE   | not DE   | not DE  |
| EVM0023731 | LG1 | hypothetical protein CISIN_1g | not DE   | not DE   | not DE   | not DE  |
| EVM0011002 | LG1 | hypothetical protein CISIN_1g | not DE   | not DE   | not DE   | not DE  |
| EVM0018800 | LG1 | hypothetical protein CISIN_1g | not DE   | not DE   | not DE   | not DE  |
| EVM0016484 | LG1 | hypothetical protein CISIN_1g | not DE   | not DE   | not DE   | not DE  |
| EVM0018860 | LG1 | hypothetical protein CISIN_1g | not DE   | not DE   | not DE   | not DE  |
| EVM0021270 | LG1 | hypothetical protein CISIN_1g | not DE   | not DE   | not DE   | not DE  |
| EVM0018584 | LG1 | hypothetical protein CISIN_1g | not DE   | not DE   | not DE   | not DE  |
| EVM0020187 | LG1 | hypothetical protein CISIN_1g | -1.50844 | 4.40E-05 | not DE   | not DE  |
| EVM0005614 | LG1 | hypothetical protein CISIN_1g | not DE   | not DE   | not DE   | not DE  |
| EVM0008273 | LG1 | hypothetical protein CISIN_1g | not DE   | not DE   | not DE   | not DE  |
| EVM0013581 | LG1 | hypothetical protein CISIN_1g | not DE   | not DE   | not DE   | not DE  |
| EVM0017405 | LG1 | hypothetical protein CISIN_1g | not DE   | not DE   | not DE   | not DE  |
| EVM0020395 | LG1 | hypothetical protein CISIN_1g | not DE   | not DE   | not DE   | not DE  |
| EVM0013898 | LG1 | hypothetical protein CISIN_1g | not DE   | not DE   | -1.15227 | 0.02237 |
| EVM0022084 | LG1 | hypothetical protein CISIN_1g | not DE   | not DE   | not DE   | not DE  |
| EVM0005440 | LG1 | hypothetical protein CISIN_1g | -2.1807  | 0.009827 | not DE   | not DE  |
| EVM0019691 | LG1 | hypothetical protein CISIN_1g | not DE   | not DE   | not DE   | not DE  |
| EVM0013630 | LG1 | hypothetical protein CISIN_1g | not DE   | not DE   | not DE   | not DE  |
| EVM0018344 | LG1 | hypothetical protein CISIN_1g | -2.72301 | 7.58E-05 | not DE   | not DE  |
| EVM0007920 | LG1 | hypothetical protein CISIN_1g | not DE   | not DE   | not DE   | not DE  |

|            |     |                               |          |          |          |         |
|------------|-----|-------------------------------|----------|----------|----------|---------|
| EVM0000198 | LG1 | hypothetical protein CISIN_1g | not DE   | not DE   | not DE   | not DE  |
| EVM0006777 | LG1 | hypothetical protein CISIN_1g | not DE   | not DE   | not DE   | not DE  |
| EVM0002615 | LG1 | hypothetical protein CISIN_1g | 2.923931 | 0.013471 | 2.958008 | #####   |
| EVM0013913 | LG1 | hypothetical protein CISIN_1g | not DE   | not DE   | not DE   | not DE  |
| EVM0016807 | LG1 | hypothetical protein CISIN_1g | not DE   | not DE   | not DE   | not DE  |
| EVM0012054 | LG1 | hypothetical protein CISIN_1g | not DE   | not DE   | not DE   | not DE  |
| EVM0000267 | LG1 | hypothetical protein CISIN_1g | not DE   | not DE   | not DE   | not DE  |
| EVM0016972 | LG1 | hypothetical protein CISIN_1g | not DE   | not DE   | not DE   | not DE  |
| EVM0010068 | LG1 | hypothetical protein CISIN_1g | not DE   | not DE   | not DE   | not DE  |
| EVM0004679 | LG1 | hypothetical protein CISIN_1g | not DE   | not DE   | not DE   | not DE  |
| EVM0006277 | LG1 | hypothetical protein CISIN_1g | not DE   | not DE   | not DE   | not DE  |
| EVM0011134 | LG1 | hypothetical protein CISIN_1g | not DE   | not DE   | not DE   | not DE  |
| EVM0018985 | LG1 | hypothetical protein CISIN_1g | not DE   | not DE   | not DE   | not DE  |
| EVM0020567 | LG1 | hypothetical protein CISIN_1g | not DE   | not DE   | not DE   | not DE  |
| EVM0003826 | LG1 | hypothetical protein CISIN_1g | not DE   | not DE   | not DE   | not DE  |
| EVM0006664 | LG1 | hypothetical protein CISIN_1g | not DE   | not DE   | not DE   | not DE  |
| EVM0008194 | LG1 | hypothetical protein CISIN_1g | not DE   | not DE   | not DE   | not DE  |
| EVM0015032 | LG1 | hypothetical protein CISIN_1g | not DE   | not DE   | not DE   | not DE  |
| EVM0019127 | LG1 | hypothetical protein CISIN_1g | not DE   | not DE   | not DE   | not DE  |
| EVM0015492 | LG1 | hypothetical protein CISIN_1g | not DE   | not DE   | not DE   | not DE  |
| EVM0016350 | LG1 | hypothetical protein CISIN_1g | not DE   | not DE   | not DE   | not DE  |
| EVM0000215 | LG1 | hypothetical protein CISIN_1g | not DE   | not DE   | not DE   | not DE  |
| EVM0010098 | LG1 | hypothetical protein CISIN_1g | not DE   | not DE   | not DE   | not DE  |
| EVM0006145 | LG1 | hypothetical protein CISIN_1g | not DE   | not DE   | 2.396131 | 0.01552 |
| EVM0015754 | LG1 | hypothetical protein CISIN_1g | not DE   | not DE   | not DE   | not DE  |
| EVM0005387 | LG1 | hypothetical protein CISIN_1g | -4.64384 | 9.29E-09 | -3.13121 | #####   |
| EVM0024193 | LG1 | hypothetical protein CISIN_1g | not DE   | not DE   | not DE   | not DE  |
| EVM0014239 | LG1 | hypothetical protein CISIN_1g | not DE   | not DE   | not DE   | not DE  |
| EVM0022557 | LG1 | hypothetical protein CISIN_1g | not DE   | not DE   | not DE   | not DE  |
| EVM0011442 | LG1 | hypothetical protein CISIN_1g | not DE   | not DE   | not DE   | not DE  |
| EVM0016277 | LG1 | hypothetical protein CISIN_1g | not DE   | not DE   | not DE   | not DE  |
| EVM0009437 | LG1 | hypothetical protein CISIN_1g | -1.21165 | 6.74E-05 | not DE   | not DE  |
| EVM0005348 | LG1 | hypothetical protein CISIN_1g | not DE   | not DE   | 1.05444  | 0.03818 |
| EVM0023141 | LG1 | hypothetical protein CISIN_1g | not DE   | not DE   | not DE   | not DE  |
| EVM0013195 | LG1 | hypothetical protein CISIN_1g | not DE   | not DE   | not DE   | not DE  |
| EVM0019131 | LG1 | hypothetical protein CISIN_1g | not DE   | not DE   | not DE   | not DE  |
| EVM0023728 | LG1 | hypothetical protein CISIN_1g | not DE   | not DE   | not DE   | not DE  |
| EVM0012041 | LG1 | hypothetical protein CISIN_1g | not DE   | not DE   | not DE   | not DE  |
| EVM0007123 | LG1 | hypothetical protein CISIN_1g | not DE   | not DE   | not DE   | not DE  |
| EVM0011255 | LG1 | hypothetical protein CISIN_1g | not DE   | not DE   | not DE   | not DE  |
| EVM0011819 | LG1 | hypothetical protein CISIN_1g | not DE   | not DE   | not DE   | not DE  |
| EVM0022870 | LG1 | hypothetical protein CISIN_1g | 3.093733 | 0.0029   | not DE   | not DE  |
| EVM0016744 | LG1 | hypothetical protein CISIN_1g | not DE   | not DE   | not DE   | not DE  |
| EVM0023596 | LG1 | hypothetical protein CISIN_1g | not DE   | not DE   | not DE   | not DE  |
| EVM0003096 | LG1 | hypothetical protein CISIN_1g | not DE   | not DE   | not DE   | not DE  |
| EVM0021997 | LG1 | hypothetical protein CISIN_1g | not DE   | not DE   | not DE   | not DE  |
| EVM0014983 | LG1 | hypothetical protein CISIN_1g | not DE   | not DE   | not DE   | not DE  |
| EVM0022643 | LG1 | hypothetical protein CISIN_1g | -1.39822 | 0.016332 | not DE   | not DE  |
| EVM0008126 | LG1 | hypothetical protein CISIN_1g | not DE   | not DE   | not DE   | not DE  |
| EVM0020709 | LG1 | hypothetical protein CISIN_1g | not DE   | not DE   | not DE   | not DE  |
| EVM0015978 | LG1 | hypothetical protein CISIN_1g | not DE   | not DE   | not DE   | not DE  |
| EVM0017504 | LG1 | hypothetical protein CISIN_1g | not DE   | not DE   | not DE   | not DE  |
| EVM0001271 | LG1 | hypothetical protein CISIN_1g | not DE   | not DE   | not DE   | not DE  |
| EVM0007757 | LG1 | hypothetical protein CISIN_1g | not DE   | not DE   | not DE   | not DE  |

|            |     |                               |          |          |          |         |
|------------|-----|-------------------------------|----------|----------|----------|---------|
| EVM0016306 | LG1 | hypothetical protein CISIN_1g | not DE   | not DE   | not DE   | not DE  |
| EVM0004785 | LG1 | hypothetical protein CISIN_1g | not DE   | not DE   | not DE   | not DE  |
| EVM0018333 | LG1 | hypothetical protein CISIN_1g | not DE   | not DE   | 1.470291 | 0.01989 |
| EVM0020239 | LG1 | hypothetical protein CISIN_1g | not DE   | not DE   | not DE   | not DE  |
| EVM0005708 | LG1 | hypothetical protein CISIN_1g | not DE   | not DE   | not DE   | not DE  |
| EVM0014202 | LG1 | hypothetical protein CISIN_1g | not DE   | not DE   | not DE   | not DE  |
| EVM0011659 | LG1 | hypothetical protein CISIN_1g | not DE   | not DE   | not DE   | not DE  |
| EVM0009135 | LG1 | hypothetical protein CISIN_1g | not DE   | not DE   | not DE   | not DE  |
| EVM0003083 | LG1 | hypothetical protein CISIN_1g | not DE   | not DE   | not DE   | not DE  |
| EVM0003576 | LG1 | hypothetical protein CISIN_1g | not DE   | not DE   | not DE   | not DE  |
| EVM0024293 | LG1 | hypothetical protein CISIN_1g | not DE   | not DE   | not DE   | not DE  |
| EVM0008340 | LG1 | hypothetical protein CISIN_1g | not DE   | not DE   | not DE   | not DE  |
| EVM0015398 | LG1 | hypothetical protein CISIN_1g | not DE   | not DE   | not DE   | not DE  |
| EVM0013169 | LG1 | hypothetical protein CISIN_1g | not DE   | not DE   | not DE   | not DE  |
| EVM0002383 | LG1 | hypothetical protein CISIN_1g | not DE   | not DE   | 2.102277 | 0.04219 |
| EVM0015218 | LG1 | hypothetical protein CISIN_1g | not DE   | not DE   | not DE   | not DE  |
| EVM0022338 | LG1 | hypothetical protein CISIN_1g | not DE   | not DE   | not DE   | not DE  |
| EVM0001917 | LG1 | hypothetical protein CISIN_1g | not DE   | not DE   | not DE   | not DE  |
| EVM0006169 | LG1 | hypothetical protein CISIN_1g | not DE   | not DE   | not DE   | not DE  |
| EVM0024598 | LG1 | hypothetical protein CISIN_1g | not DE   | not DE   | not DE   | not DE  |
| EVM0002808 | LG1 | hypothetical protein CISIN_1g | not DE   | not DE   | not DE   | not DE  |
| EVM0019632 | LG1 | hypothetical protein CISIN_1g | not DE   | not DE   | not DE   | not DE  |
| EVM0010011 | LG1 | hypothetical protein CISIN_1g | not DE   | not DE   | not DE   | not DE  |
| EVM0017247 | LG1 | hypothetical protein CISIN_1g | not DE   | not DE   | not DE   | not DE  |
| EVM0000755 | LG1 | hypothetical protein CISIN_1g | not DE   | not DE   | not DE   | not DE  |
| EVM0022789 | LG1 | hypothetical protein CISIN_1g | not DE   | not DE   | not DE   | not DE  |
| EVM0018008 | LG1 | hypothetical protein CISIN_1g | not DE   | not DE   | not DE   | not DE  |
| EVM0023598 | LG1 | hypothetical protein CISIN_1g | not DE   | not DE   | not DE   | not DE  |
| EVM0014164 | LG1 | hypothetical protein CISIN_1g | not DE   | not DE   | not DE   | not DE  |
| EVM0006430 | LG1 | hypothetical protein CISIN_1g | not DE   | not DE   | not DE   | not DE  |
| EVM0023995 | LG1 | hypothetical protein CISIN_1g | not DE   | not DE   | not DE   | not DE  |
| EVM0023413 | LG1 | hypothetical protein CISIN_1g | not DE   | not DE   | not DE   | not DE  |
| EVM0014122 | LG1 | hypothetical protein CISIN_1g | not DE   | not DE   | not DE   | not DE  |
| EVM0009473 | LG1 | hypothetical protein CISIN_1g | not DE   | not DE   | not DE   | not DE  |
| EVM0004654 | LG1 | hypothetical protein CISIN_1g | not DE   | not DE   | not DE   | not DE  |
| EVM0016577 | LG1 | hypothetical protein CISIN_1g | not DE   | not DE   | not DE   | not DE  |
| EVM0009543 | LG1 | hypothetical protein CISIN_1g | not DE   | not DE   | not DE   | not DE  |
| EVM0014500 | LG1 | hypothetical protein CISIN_1g | not DE   | not DE   | not DE   | not DE  |
| EVM0020046 | LG1 | hypothetical protein CISIN_1g | not DE   | not DE   | not DE   | not DE  |
| EVM0013221 | LG1 | hypothetical protein CISIN_1g | not DE   | not DE   | not DE   | not DE  |
| EVM0014609 | LG1 | hypothetical protein CISIN_1g | not DE   | not DE   | not DE   | not DE  |
| EVM0001161 | LG1 | hypothetical protein CISIN_1g | 1.665607 | 0.008257 | not DE   | not DE  |
| EVM0000611 | LG1 | hypothetical protein CISIN_1g | not DE   | not DE   | not DE   | not DE  |
| EVM0019597 | LG1 | hypothetical protein CISIN_1g | not DE   | not DE   | not DE   | not DE  |
| EVM0022177 | LG1 | hypothetical protein CISIN_1g | not DE   | not DE   | not DE   | not DE  |
| EVM0001317 | LG1 | hypothetical protein CISIN_1g | not DE   | not DE   | not DE   | not DE  |
| EVM0012279 | LG1 | hypothetical protein CISIN_1g | not DE   | not DE   | not DE   | not DE  |
| EVM0019775 | LG1 | hypothetical protein CISIN_1g | not DE   | not DE   | not DE   | not DE  |
| EVM0004989 | LG1 | hypothetical protein CISIN_1g | not DE   | not DE   | not DE   | not DE  |
| EVM0007752 | LG1 | hypothetical protein CISIN_1g | not DE   | not DE   | not DE   | not DE  |
| EVM0010338 | LG1 | hypothetical protein CISIN_1g | not DE   | not DE   | not DE   | not DE  |
| EVM0014076 | LG1 | hypothetical protein CISIN_1g | not DE   | not DE   | not DE   | not DE  |
| EVM0015272 | LG1 | hypothetical protein CISIN_1g | not DE   | not DE   | not DE   | not DE  |
| EVM0017734 | LG1 | hypothetical protein CISIN_1g | not DE   | not DE   | not DE   | not DE  |

|            |     |                               |          |          |          |         |
|------------|-----|-------------------------------|----------|----------|----------|---------|
| EVM0020118 | LG1 | hypothetical protein CISIN_1g | not DE   | not DE   | not DE   | not DE  |
| EVM0014090 | LG1 | hypothetical protein CISIN_1g | not DE   | not DE   | not DE   | not DE  |
| EVM0021636 | LG1 | hypothetical protein CISIN_1g | -3.33358 | 0.014279 | not DE   | not DE  |
| EVM0006967 | LG1 | hypothetical protein CISIN_1g | not DE   | not DE   | -1.96519 | 0.00027 |
| EVM0022725 | LG1 | hypothetical protein CISIN_1g | not DE   | not DE   | not DE   | not DE  |
| EVM0003800 | LG1 | hypothetical protein CISIN_1g | not DE   | not DE   | not DE   | not DE  |
| EVM0005368 | LG1 | hypothetical protein CISIN_1g | not DE   | not DE   | not DE   | not DE  |
| EVM0018893 | LG1 | hypothetical protein CISIN_1g | not DE   | not DE   | not DE   | not DE  |
| EVM0002043 | LG1 | hypothetical protein CISIN_1g | not DE   | not DE   | not DE   | not DE  |
| EVM0000355 | LG1 | hypothetical protein CISIN_1g | not DE   | not DE   | not DE   | not DE  |
| EVM0018327 | LG1 | hypothetical protein CISIN_1g | not DE   | not DE   | not DE   | not DE  |
| EVM0005927 | LG1 | hypothetical protein CISIN_1g | not DE   | not DE   | not DE   | not DE  |
| EVM0023190 | LG1 | hypothetical protein CISIN_1g | not DE   | not DE   | not DE   | not DE  |
| EVM0011808 | LG1 | hypothetical protein CISIN_1g | not DE   | not DE   | not DE   | not DE  |
| EVM0016896 | LG1 | hypothetical protein CISIN_1g | not DE   | not DE   | not DE   | not DE  |
| EVM0019776 | LG1 | hypothetical protein CISIN_1g | not DE   | not DE   | not DE   | not DE  |
| EVM0020346 | LG1 | hypothetical protein CISIN_1g | not DE   | not DE   | not DE   | not DE  |
| EVM0004400 | LG1 | hypothetical protein CISIN_1g | not DE   | not DE   | not DE   | not DE  |
| EVM0004936 | LG1 | hypothetical protein CISIN_1g | not DE   | not DE   | not DE   | not DE  |
| EVM0010963 | LG1 | hypothetical protein CISIN_1g | not DE   | not DE   | not DE   | not DE  |
| EVM0016230 | LG1 | hypothetical protein CISIN_1g | not DE   | not DE   | not DE   | not DE  |
| EVM0013731 | LG1 | hypothetical protein CISIN_1g | not DE   | not DE   | not DE   | not DE  |
| EVM0005038 | LG1 | hypothetical protein CISIN_1g | not DE   | not DE   | not DE   | not DE  |
| EVM0009685 | LG1 | hypothetical protein CISIN_1g | 1.186045 | 0.019264 | not DE   | not DE  |
| EVM0023135 | LG1 | hypothetical protein CISIN_1g | not DE   | not DE   | not DE   | not DE  |
| EVM0004357 | LG1 | hypothetical protein CISIN_1g | not DE   | not DE   | not DE   | not DE  |
| EVM0014996 | LG1 | hypothetical protein CISIN_1g | 2.217877 | 0.014607 | not DE   | not DE  |
| EVM0009761 | LG1 | hypothetical protein CISIN_1g | not DE   | not DE   | not DE   | not DE  |
| EVM0013674 | LG1 | hypothetical protein CISIN_1g | not DE   | not DE   | not DE   | not DE  |
| EVM0011553 | LG1 | hypothetical protein CISIN_1g | not DE   | not DE   | 1.291111 | 0.01517 |
| EVM0024048 | LG1 | hypothetical protein CISIN_1g | not DE   | not DE   | not DE   | not DE  |
| EVM0004445 | LG1 | hypothetical protein CISIN_1g | not DE   | not DE   | not DE   | not DE  |
| EVM0020748 | LG1 | hypothetical protein CISIN_1g | not DE   | not DE   | not DE   | not DE  |
| EVM0019284 | LG1 | hypothetical protein CISIN_1g | not DE   | not DE   | not DE   | not DE  |
| EVM0006672 | LG1 | hypothetical protein CISIN_1g | not DE   | not DE   | not DE   | not DE  |
| EVM0002811 | LG1 | hypothetical protein CISIN_1g | not DE   | not DE   | not DE   | not DE  |
| EVM0009608 | LG1 | hypothetical protein CISIN_1g | not DE   | not DE   | not DE   | not DE  |
| EVM0002646 | LG1 | hypothetical protein CISIN_1g | not DE   | not DE   | not DE   | not DE  |
| EVM0000973 | LG1 | hypothetical protein CISIN_1g | not DE   | not DE   | not DE   | not DE  |
| EVM0010004 | LG1 | hypothetical protein CISIN_1g | not DE   | not DE   | not DE   | not DE  |
| EVM0017726 | LG1 | hypothetical protein CISIN_1g | -2.27241 | 0.001636 | not DE   | not DE  |
| EVM0013301 | LG1 | hypothetical protein CISIN_1g | not DE   | not DE   | not DE   | not DE  |
| EVM0013626 | LG1 | hypothetical protein CISIN_1g | not DE   | not DE   | not DE   | not DE  |
| EVM0016513 | LG1 | hypothetical protein CISIN_1g | not DE   | not DE   | not DE   | not DE  |
| EVM0013244 | LG1 | hypothetical protein CISIN_1g | not DE   | not DE   | not DE   | not DE  |
| EVM0000585 | LG1 | hypothetical protein CISIN_1g | not DE   | not DE   | not DE   | not DE  |
| EVM0007371 | LG1 | hypothetical protein CISIN_1g | not DE   | not DE   | not DE   | not DE  |
| EVM0012635 | LG1 | hypothetical protein CISIN_1g | not DE   | not DE   | not DE   | not DE  |
| EVM0013799 | LG1 | hypothetical protein CISIN_1g | not DE   | not DE   | not DE   | not DE  |
| EVM0006648 | LG1 | hypothetical protein CISIN_1g | not DE   | not DE   | not DE   | not DE  |
| EVM0010157 | LG1 | hypothetical protein CISIN_1g | not DE   | not DE   | not DE   | not DE  |
| EVM0018423 | LG1 | hypothetical protein CISIN_1g | not DE   | not DE   | not DE   | not DE  |
| EVM0024468 | LG1 | hypothetical protein CISIN_1g | 2.644458 | 0.00021  | not DE   | not DE  |
| EVM0010236 | LG1 | hypothetical protein Csa_5G63 | not DE   | not DE   | not DE   | not DE  |



|            |     |                               |          |          |          |         |
|------------|-----|-------------------------------|----------|----------|----------|---------|
| EVM0018391 | LG1 | hypothetical protein Csa_7G04 | not DE   | not DE   | not DE   | not DE  |
| EVM0015998 | LG1 | hypothetical protein EUGRSUZ_ | not DE   | not DE   | not DE   | not DE  |
| EVM0022791 | LG1 | hypothetical protein EUGRSUZ_ | not DE   | not DE   | not DE   | not DE  |
| EVM0000229 | LG1 | hypothetical protein EUTSA_v1 | not DE   | not DE   | not DE   | not DE  |
| EVM0010631 | LG1 | hypothetical protein F383_011 | 1.413594 | 0.037605 | not DE   | not DE  |
| EVM0018041 | LG1 | hypothetical protein F383_011 | not DE   | not DE   | not DE   | not DE  |
| EVM0006289 | LG1 | hypothetical protein F383_096 | not DE   | not DE   | not DE   | not DE  |
| EVM0020895 | LG1 | hypothetical protein F383_179 | not DE   | not DE   | -1.38772 | #####   |
| EVM0004492 | LG1 | hypothetical protein F383_224 | not DE   | not DE   | not DE   | not DE  |
| EVM0011956 | LG1 | hypothetical protein F383_273 | not DE   | not DE   | not DE   | not DE  |
| EVM0019145 | LG1 | hypothetical protein F383_285 | not DE   | not DE   | not DE   | not DE  |
| EVM0000977 | LG1 | hypothetical protein F383_351 | not DE   | not DE   | 1.172801 | #####   |
| EVM0020984 | LG1 | hypothetical protein JCGZ_017 | not DE   | not DE   | not DE   | not DE  |
| EVM0005297 | LG1 | hypothetical protein JCGZ_018 | not DE   | not DE   | not DE   | not DE  |
| EVM0024006 | LG1 | hypothetical protein JCGZ_027 | not DE   | not DE   | 1.107935 | 0.00011 |
| EVM0003252 | LG1 | hypothetical protein JCGZ_031 | not DE   | not DE   | not DE   | not DE  |
| EVM0002885 | LG1 | hypothetical protein JCGZ_043 | not DE   | not DE   | not DE   | not DE  |
| EVM0019455 | LG1 | hypothetical protein JCGZ_043 | not DE   | not DE   | not DE   | not DE  |
| EVM0001934 | LG1 | hypothetical protein JCGZ_049 | not DE   | not DE   | not DE   | not DE  |
| EVM0002201 | LG1 | hypothetical protein JCGZ_052 | not DE   | not DE   | not DE   | not DE  |
| EVM0001777 | LG1 | hypothetical protein JCGZ_101 | not DE   | not DE   | not DE   | not DE  |
| EVM0020019 | LG1 | hypothetical protein JCGZ_101 | not DE   | not DE   | not DE   | not DE  |
| EVM0015706 | LG1 | hypothetical protein JCGZ_101 | not DE   | not DE   | not DE   | not DE  |
| EVM0015012 | LG1 | hypothetical protein JCGZ_101 | not DE   | not DE   | not DE   | not DE  |
| EVM0018924 | LG1 | hypothetical protein JCGZ_101 | not DE   | not DE   | not DE   | not DE  |
| EVM0001738 | LG1 | hypothetical protein JCGZ_101 | not DE   | not DE   | not DE   | not DE  |
| EVM0006889 | LG1 | hypothetical protein JCGZ_101 | not DE   | not DE   | not DE   | not DE  |
| EVM0010870 | LG1 | hypothetical protein JCGZ_102 | not DE   | not DE   | not DE   | not DE  |
| EVM0013845 | LG1 | hypothetical protein JCGZ_102 | not DE   | not DE   | not DE   | not DE  |
| EVM0017478 | LG1 | hypothetical protein JCGZ_102 | not DE   | not DE   | not DE   | not DE  |
| EVM0021501 | LG1 | hypothetical protein JCGZ_102 | not DE   | not DE   | not DE   | not DE  |
| EVM0000631 | LG1 | hypothetical protein JCGZ_106 | not DE   | not DE   | 1.041935 | 0.00282 |
| EVM0011028 | LG1 | hypothetical protein JCGZ_118 | not DE   | not DE   | not DE   | not DE  |
| EVM0004484 | LG1 | hypothetical protein JCGZ_122 | not DE   | not DE   | not DE   | not DE  |
| EVM0022621 | LG1 | hypothetical protein JCGZ_128 | not DE   | not DE   | not DE   | not DE  |
| EVM0024119 | LG1 | hypothetical protein JCGZ_129 | not DE   | not DE   | not DE   | not DE  |
| EVM0012531 | LG1 | hypothetical protein JCGZ_137 | not DE   | not DE   | not DE   | not DE  |
| EVM0003825 | LG1 | hypothetical protein JCGZ_137 | not DE   | not DE   | not DE   | not DE  |
| EVM0018102 | LG1 | hypothetical protein JCGZ_138 | not DE   | not DE   | 1.006855 | 0.01542 |
| EVM0000899 | LG1 | hypothetical protein JCGZ_139 | not DE   | not DE   | -2.29065 | 0.01385 |
| EVM0002424 | LG1 | hypothetical protein JCGZ_139 | not DE   | not DE   | not DE   | not DE  |
| EVM0013020 | LG1 | hypothetical protein JCGZ_139 | not DE   | not DE   | not DE   | not DE  |
| EVM0019682 | LG1 | hypothetical protein JCGZ_139 | not DE   | not DE   | not DE   | not DE  |
| EVM0008324 | LG1 | hypothetical protein JCGZ_139 | not DE   | not DE   | not DE   | not DE  |
| EVM0002012 | LG1 | hypothetical protein JCGZ_140 | not DE   | not DE   | not DE   | not DE  |
| EVM0007345 | LG1 | hypothetical protein JCGZ_140 | not DE   | not DE   | not DE   | not DE  |
| EVM0008977 | LG1 | hypothetical protein JCGZ_140 | not DE   | not DE   | not DE   | not DE  |
| EVM0014075 | LG1 | hypothetical protein JCGZ_140 | not DE   | not DE   | -1.63888 | 0.01873 |
| EVM0000757 | LG1 | hypothetical protein JCGZ_141 | not DE   | not DE   | not DE   | not DE  |
| EVM0023482 | LG1 | hypothetical protein JCGZ_141 | not DE   | not DE   | not DE   | not DE  |
| EVM0014562 | LG1 | hypothetical protein JCGZ_141 | not DE   | not DE   | not DE   | not DE  |
| EVM0020753 | LG1 | hypothetical protein JCGZ_141 | not DE   | not DE   | not DE   | not DE  |
| EVM0020884 | LG1 | hypothetical protein JCGZ_141 | not DE   | not DE   | not DE   | not DE  |
| EVM0015957 | LG1 | hypothetical protein JCGZ_142 | not DE   | not DE   | not DE   | not DE  |

|            |     |                               |          |          |          |         |
|------------|-----|-------------------------------|----------|----------|----------|---------|
| EVM0010449 | LG1 | hypothetical protein JCGZ_142 | not DE   | not DE   | not DE   | not DE  |
| EVM0017370 | LG1 | hypothetical protein JCGZ_142 | not DE   | not DE   | not DE   | not DE  |
| EVM0001081 | LG1 | hypothetical protein JCGZ_142 | not DE   | not DE   | not DE   | not DE  |
| EVM0003727 | LG1 | hypothetical protein JCGZ_142 | not DE   | not DE   | not DE   | not DE  |
| EVM0021581 | LG1 | hypothetical protein JCGZ_143 | not DE   | not DE   | 1.001958 | #####   |
| EVM0010873 | LG1 | hypothetical protein JCGZ_143 | not DE   | not DE   | not DE   | not DE  |
| EVM0016351 | LG1 | hypothetical protein JCGZ_143 | not DE   | not DE   | not DE   | not DE  |
| EVM0017615 | LG1 | hypothetical protein JCGZ_143 | not DE   | not DE   | not DE   | not DE  |
| EVM0007765 | LG1 | hypothetical protein JCGZ_144 | not DE   | not DE   | not DE   | not DE  |
| EVM0005287 | LG1 | hypothetical protein JCGZ_144 | not DE   | not DE   | not DE   | not DE  |
| EVM0007220 | LG1 | hypothetical protein JCGZ_145 | not DE   | not DE   | not DE   | not DE  |
| EVM0001048 | LG1 | hypothetical protein JCGZ_145 | not DE   | not DE   | -1.11905 | 0.00028 |
| EVM0018526 | LG1 | hypothetical protein JCGZ_145 | not DE   | not DE   | -1.52612 | 0.00228 |
| EVM0019450 | LG1 | hypothetical protein JCGZ_145 | not DE   | not DE   | -3.44566 | #####   |
| EVM0024615 | LG1 | hypothetical protein JCGZ_145 | not DE   | not DE   | not DE   | not DE  |
| EVM0017210 | LG1 | hypothetical protein JCGZ_145 | not DE   | not DE   | not DE   | not DE  |
| EVM0008804 | LG1 | hypothetical protein JCGZ_145 | not DE   | not DE   | not DE   | not DE  |
| EVM0012545 | LG1 | hypothetical protein JCGZ_146 | not DE   | not DE   | not DE   | not DE  |
| EVM0013998 | LG1 | hypothetical protein JCGZ_146 | not DE   | not DE   | not DE   | not DE  |
| EVM0000449 | LG1 | hypothetical protein JCGZ_146 | not DE   | not DE   | not DE   | not DE  |
| EVM0018432 | LG1 | hypothetical protein JCGZ_146 | not DE   | not DE   | not DE   | not DE  |
| EVM0011955 | LG1 | hypothetical protein JCGZ_146 | not DE   | not DE   | not DE   | not DE  |
| EVM0008477 | LG1 | hypothetical protein JCGZ_146 | not DE   | not DE   | not DE   | not DE  |
| EVM0007369 | LG1 | hypothetical protein JCGZ_146 | not DE   | not DE   | not DE   | not DE  |
| EVM0014492 | LG1 | hypothetical protein JCGZ_146 | not DE   | not DE   | not DE   | not DE  |
| EVM0016881 | LG1 | hypothetical protein JCGZ_146 | -2.03838 | 0.049205 | not DE   | not DE  |
| EVM0023809 | LG1 | hypothetical protein JCGZ_146 | not DE   | not DE   | not DE   | not DE  |
| EVM0024282 | LG1 | hypothetical protein JCGZ_146 | not DE   | not DE   | not DE   | not DE  |
| EVM0004576 | LG1 | hypothetical protein JCGZ_146 | not DE   | not DE   | not DE   | not DE  |
| EVM0019867 | LG1 | hypothetical protein JCGZ_146 | not DE   | not DE   | not DE   | not DE  |
| EVM0023573 | LG1 | hypothetical protein JCGZ_146 | not DE   | not DE   | not DE   | not DE  |
| EVM0019171 | LG1 | hypothetical protein JCGZ_146 | not DE   | not DE   | not DE   | not DE  |
| EVM0006160 | LG1 | hypothetical protein JCGZ_150 | not DE   | not DE   | not DE   | not DE  |
| EVM0000812 | LG1 | hypothetical protein JCGZ_150 | not DE   | not DE   | not DE   | not DE  |
| EVM0001016 | LG1 | hypothetical protein JCGZ_150 | not DE   | not DE   | not DE   | not DE  |
| EVM0011830 | LG1 | hypothetical protein JCGZ_150 | not DE   | not DE   | not DE   | not DE  |
| EVM0012551 | LG1 | hypothetical protein JCGZ_150 | not DE   | not DE   | not DE   | not DE  |
| EVM0008049 | LG1 | hypothetical protein JCGZ_150 | not DE   | not DE   | not DE   | not DE  |
| EVM0019699 | LG1 | hypothetical protein JCGZ_151 | not DE   | not DE   | not DE   | not DE  |
| EVM0021713 | LG1 | hypothetical protein JCGZ_151 | not DE   | not DE   | not DE   | not DE  |
| EVM0015717 | LG1 | hypothetical protein JCGZ_151 | not DE   | not DE   | not DE   | not DE  |
| EVM0008204 | LG1 | hypothetical protein JCGZ_162 | not DE   | not DE   | not DE   | not DE  |
| EVM0008317 | LG1 | hypothetical protein JCGZ_171 | not DE   | not DE   | not DE   | not DE  |
| EVM0008637 | LG1 | hypothetical protein JCGZ_175 | not DE   | not DE   | not DE   | not DE  |
| EVM0002532 | LG1 | hypothetical protein JCGZ_176 | not DE   | not DE   | not DE   | not DE  |
| EVM0023395 | LG1 | hypothetical protein JCGZ_176 | not DE   | not DE   | not DE   | not DE  |
| EVM0008917 | LG1 | hypothetical protein JCGZ_176 | not DE   | not DE   | not DE   | not DE  |
| EVM0024493 | LG1 | hypothetical protein JCGZ_184 | not DE   | not DE   | not DE   | not DE  |
| EVM0020609 | LG1 | hypothetical protein JCGZ_184 | -2.4307  | 0.001634 | not DE   | not DE  |
| EVM0018002 | LG1 | hypothetical protein JCGZ_184 | not DE   | not DE   | not DE   | not DE  |
| EVM0023954 | LG1 | hypothetical protein JCGZ_186 | not DE   | not DE   | -1.76253 | 0.01292 |
| EVM0007626 | LG1 | hypothetical protein JCGZ_193 | not DE   | not DE   | not DE   | not DE  |
| EVM0011672 | LG1 | hypothetical protein JCGZ_193 | not DE   | not DE   | not DE   | not DE  |
| EVM0014531 | LG1 | hypothetical protein JCGZ_201 | not DE   | not DE   | not DE   | not DE  |

|            |     |                               |          |          |        |        |
|------------|-----|-------------------------------|----------|----------|--------|--------|
| EVM0004843 | LG1 | hypothetical protein JCGZ_218 | not DE   | not DE   | not DE | not DE |
| EVM0017679 | LG1 | hypothetical protein JCGZ_218 | not DE   | not DE   | not DE | not DE |
| EVM0006088 | LG1 | hypothetical protein JCGZ_218 | not DE   | not DE   | not DE | not DE |
| EVM0015971 | LG1 | hypothetical protein JCGZ_219 | not DE   | not DE   | not DE | not DE |
| EVM0013897 | LG1 | hypothetical protein JCGZ_219 | -3.18525 | 0.000619 | not DE | not DE |
| EVM0013526 | LG1 | hypothetical protein JCGZ_219 | not DE   | not DE   | not DE | not DE |
| EVM0011098 | LG1 | hypothetical protein JCGZ_219 | not DE   | not DE   | not DE | not DE |
| EVM0021219 | LG1 | hypothetical protein JCGZ_220 | not DE   | not DE   | not DE | not DE |
| EVM0007117 | LG1 | hypothetical protein JCGZ_228 | not DE   | not DE   | not DE | not DE |
| EVM0007267 | LG1 | hypothetical protein JCGZ_238 | not DE   | not DE   | not DE | not DE |
| EVM0010384 | LG1 | hypothetical protein JCGZ_238 | not DE   | not DE   | not DE | not DE |
| EVM0000140 | LG1 | hypothetical protein JCGZ_254 | not DE   | not DE   | not DE | not DE |
| EVM0020493 | LG1 | hypothetical protein JCGZ_257 | not DE   | not DE   | not DE | not DE |
| EVM0001253 | LG1 | hypothetical protein JCGZ_257 | not DE   | not DE   | not DE | not DE |
| EVM0004984 | LG1 | hypothetical protein JCGZ_257 | not DE   | not DE   | not DE | not DE |
| EVM0006130 | LG1 | hypothetical protein JCGZ_258 | not DE   | not DE   | not DE | not DE |
| EVM0024661 | LG1 | hypothetical protein JCGZ_258 | -1.92775 | 0.000403 | not DE | not DE |
| EVM0004248 | LG1 | hypothetical protein JCGZ_263 | 1.85854  | 4.65E-07 | not DE | not DE |
| EVM0002410 | LG1 | hypothetical protein JCGZ_264 | not DE   | not DE   | not DE | not DE |
| EVM0003408 | LG1 | hypothetical protein JCGZ_264 | not DE   | not DE   | not DE | not DE |
| EVM0003034 | LG1 | hypothetical protein JCGZ_264 | not DE   | not DE   | not DE | not DE |
| EVM0017691 | LG1 | hypothetical protein JCGZ_268 | not DE   | not DE   | not DE | not DE |
| EVM0023397 | LG1 | hypothetical protein JCGZ_268 | not DE   | not DE   | not DE | not DE |
| EVM0001144 | LG1 | hypothetical protein JCGZ_268 | not DE   | not DE   | not DE | not DE |
| EVM0004801 | LG1 | hypothetical protein JCGZ_268 | not DE   | not DE   | not DE | not DE |
| EVM0018299 | LG1 | hypothetical protein JCGZ_269 | -1.54563 | 0.013196 | not DE | not DE |
| EVM0009689 | LG1 | hypothetical protein L484_001 | not DE   | not DE   | not DE | not DE |
| EVM0005300 | LG1 | hypothetical protein L484_002 | not DE   | not DE   | not DE | not DE |
| EVM0020560 | LG1 | hypothetical protein L484_002 | not DE   | not DE   | not DE | not DE |
| EVM0014190 | LG1 | hypothetical protein L484_004 | not DE   | not DE   | not DE | not DE |
| EVM0020697 | LG1 | hypothetical protein L484_007 | not DE   | not DE   | not DE | not DE |
| EVM0003246 | LG1 | hypothetical protein L484_010 | not DE   | not DE   | not DE | not DE |
| EVM0004962 | LG1 | hypothetical protein L484_015 | not DE   | not DE   | not DE | not DE |
| EVM0016635 | LG1 | hypothetical protein L484_017 | not DE   | not DE   | not DE | not DE |
| EVM0002376 | LG1 | hypothetical protein L484_018 | not DE   | not DE   | not DE | not DE |
| EVM0019846 | LG1 | hypothetical protein L484_018 | not DE   | not DE   | not DE | not DE |
| EVM0006721 | LG1 | hypothetical protein L484_022 | not DE   | not DE   | not DE | not DE |
| EVM0018133 | LG1 | hypothetical protein L484_023 | not DE   | not DE   | not DE | not DE |
| EVM0010198 | LG1 | hypothetical protein MIMGU_mg | not DE   | not DE   | not DE | not DE |
| EVM0011750 | LG1 | hypothetical protein MTR_4g04 | not DE   | not DE   | not DE | not DE |
| EVM0021436 | LG1 | hypothetical protein MTR_4g10 | not DE   | not DE   | not DE | not DE |
| EVM0022975 | LG1 | hypothetical protein MTR_4g10 | not DE   | not DE   | not DE | not DE |
| EVM0009409 | LG1 | hypothetical protein MTR_8g46 | not DE   | not DE   | not DE | not DE |
| EVM0011471 | LG1 | hypothetical protein PHAVU_00 | not DE   | not DE   | not DE | not DE |
| EVM0000465 | LG1 | hypothetical protein PHAVU_00 | not DE   | not DE   | not DE | not DE |
| EVM0010554 | LG1 | hypothetical protein PHAVU_00 | not DE   | not DE   | not DE | not DE |
| EVM0014231 | LG1 | hypothetical protein PHAVU_00 | not DE   | not DE   | not DE | not DE |
| EVM0003306 | LG1 | hypothetical protein PHAVU_00 | 3.208203 | 0.000554 | not DE | not DE |
| EVM0021537 | LG1 | hypothetical protein PHAVU_00 | not DE   | not DE   | not DE | not DE |
| EVM0017400 | LG1 | hypothetical protein PHAVU_00 | not DE   | not DE   | not DE | not DE |
| EVM0023385 | LG1 | hypothetical protein PHAVU_00 | not DE   | not DE   | not DE | not DE |
| EVM0009874 | LG1 | hypothetical protein POPTR_00 | not DE   | not DE   | not DE | not DE |
| EVM0022548 | LG1 | hypothetical protein POPTR_00 | not DE   | not DE   | not DE | not DE |
| EVM0021818 | LG1 | hypothetical protein POPTR_00 | -2.05526 | 0.000213 | not DE | not DE |

|            |     |                               |          |          |          |         |
|------------|-----|-------------------------------|----------|----------|----------|---------|
| EVM0003934 | LG1 | hypothetical protein POPTR_00 | not DE   | not DE   | not DE   | not DE  |
| EVM0002960 | LG1 | hypothetical protein POPTR_00 | not DE   | not DE   | -5.6886  | #####   |
| EVM0019644 | LG1 | hypothetical protein POPTR_00 | not DE   | not DE   | not DE   | not DE  |
| EVM0008652 | LG1 | hypothetical protein POPTR_00 | not DE   | not DE   | not DE   | not DE  |
| EVM0019524 | LG1 | hypothetical protein POPTR_00 | not DE   | not DE   | not DE   | not DE  |
| EVM0007489 | LG1 | hypothetical protein POPTR_00 | not DE   | not DE   | not DE   | not DE  |
| EVM0010079 | LG1 | hypothetical protein POPTR_00 | not DE   | not DE   | not DE   | not DE  |
| EVM0012727 | LG1 | hypothetical protein POPTR_00 | not DE   | not DE   | not DE   | not DE  |
| EVM0012640 | LG1 | hypothetical protein POPTR_00 | not DE   | not DE   | not DE   | not DE  |
| EVM0000859 | LG1 | hypothetical protein POPTR_00 | not DE   | not DE   | not DE   | not DE  |
| EVM0000286 | LG1 | hypothetical protein POPTR_00 | not DE   | not DE   | not DE   | not DE  |
| EVM0004148 | LG1 | hypothetical protein POPTR_00 | not DE   | not DE   | not DE   | not DE  |
| EVM0022655 | LG1 | hypothetical protein POPTR_00 | not DE   | not DE   | not DE   | not DE  |
| EVM0019548 | LG1 | hypothetical protein POPTR_00 | not DE   | not DE   | not DE   | not DE  |
| EVM0023398 | LG1 | hypothetical protein POPTR_00 | not DE   | not DE   | not DE   | not DE  |
| EVM0001051 | LG1 | hypothetical protein POPTR_00 | not DE   | not DE   | not DE   | not DE  |
| EVM0004084 | LG1 | hypothetical protein POPTR_00 | not DE   | not DE   | not DE   | not DE  |
| EVM0007928 | LG1 | hypothetical protein POPTR_00 | not DE   | not DE   | not DE   | not DE  |
| EVM0007645 | LG1 | hypothetical protein POPTR_00 | not DE   | not DE   | not DE   | not DE  |
| EVM0019002 | LG1 | hypothetical protein POPTR_00 | not DE   | not DE   | not DE   | not DE  |
| EVM0002949 | LG1 | hypothetical protein POPTR_00 | not DE   | not DE   | not DE   | not DE  |
| EVM0006046 | LG1 | hypothetical protein POPTR_00 | not DE   | not DE   | not DE   | not DE  |
| EVM0014101 | LG1 | hypothetical protein POPTR_00 | not DE   | not DE   | not DE   | not DE  |
| EVM0023542 | LG1 | hypothetical protein POPTR_00 | not DE   | not DE   | not DE   | not DE  |
| EVM0023680 | LG1 | hypothetical protein POPTR_00 | not DE   | not DE   | not DE   | not DE  |
| EVM0005568 | LG1 | hypothetical protein POPTR_00 | not DE   | not DE   | not DE   | not DE  |
| EVM0021027 | LG1 | hypothetical protein POPTR_00 | not DE   | not DE   | not DE   | not DE  |
| EVM0015561 | LG1 | hypothetical protein POPTR_00 | not DE   | not DE   | not DE   | not DE  |
| EVM0000764 | LG1 | hypothetical protein POPTR_00 | not DE   | not DE   | not DE   | not DE  |
| EVM0010768 | LG1 | hypothetical protein POPTR_00 | -1.47717 | 0.036253 | 2.367166 | #####   |
| EVM0018077 | LG1 | hypothetical protein POPTR_00 | not DE   | not DE   | not DE   | not DE  |
| EVM0016189 | LG1 | hypothetical protein POPTR_00 | not DE   | not DE   | not DE   | not DE  |
| EVM0000334 | LG1 | hypothetical protein POPTR_00 | not DE   | not DE   | not DE   | not DE  |
| EVM0010778 | LG1 | hypothetical protein POPTR_00 | not DE   | not DE   | not DE   | not DE  |
| EVM0010850 | LG1 | hypothetical protein POPTR_00 | not DE   | not DE   | not DE   | not DE  |
| EVM0007675 | LG1 | hypothetical protein POPTR_00 | -3.47211 | 0.018804 | not DE   | not DE  |
| EVM0011656 | LG1 | hypothetical protein POPTR_00 | not DE   | not DE   | not DE   | not DE  |
| EVM0022024 | LG1 | hypothetical protein POPTR_00 | not DE   | not DE   | not DE   | not DE  |
| EVM0012614 | LG1 | hypothetical protein POPTR_00 | not DE   | not DE   | not DE   | not DE  |
| EVM0024478 | LG1 | hypothetical protein POPTR_00 | not DE   | not DE   | not DE   | not DE  |
| EVM0011822 | LG1 | hypothetical protein POPTR_00 | not DE   | not DE   | not DE   | not DE  |
| EVM0002520 | LG1 | hypothetical protein POPTR_00 | not DE   | not DE   | not DE   | not DE  |
| EVM0010156 | LG1 | hypothetical protein POPTR_00 | not DE   | not DE   | not DE   | not DE  |
| EVM0019407 | LG1 | hypothetical protein POPTR_00 | not DE   | not DE   | not DE   | not DE  |
| EVM0015546 | LG1 | hypothetical protein POPTR_00 | -2.14149 | 0.042897 | not DE   | not DE  |
| EVM0008163 | LG1 | hypothetical protein POPTR_00 | not DE   | not DE   | not DE   | not DE  |
| EVM0010700 | LG1 | hypothetical protein POPTR_00 | not DE   | not DE   | not DE   | not DE  |
| EVM0003689 | LG1 | hypothetical protein POPTR_01 | not DE   | not DE   | not DE   | not DE  |
| EVM0017077 | LG1 | hypothetical protein PRUPE_pp | not DE   | not DE   | not DE   | not DE  |
| EVM0022721 | LG1 | hypothetical protein PRUPE_pp | not DE   | not DE   | not DE   | not DE  |
| EVM0013361 | LG1 | hypothetical protein PRUPE_pp | not DE   | not DE   | not DE   | not DE  |
| EVM0001325 | LG1 | hypothetical protein PRUPE_pp | not DE   | not DE   | not DE   | not DE  |
| EVM0010461 | LG1 | hypothetical protein PRUPE_pp | not DE   | not DE   | -1.27129 | 0.04531 |
| EVM0020280 | LG1 | hypothetical protein PRUPE_pp | not DE   | not DE   | not DE   | not DE  |

|            |     |                               |          |          |          |         |
|------------|-----|-------------------------------|----------|----------|----------|---------|
| EVM0000273 | LG1 | hypothetical protein PRUPE_pp | not DE   | not DE   | not DE   | not DE  |
| EVM0014725 | LG1 | hypothetical protein PRUPE_pp | not DE   | not DE   | not DE   | not DE  |
| EVM0016677 | LG1 | hypothetical protein PRUPE_pp | not DE   | not DE   | not DE   | not DE  |
| EVM0021567 | LG1 | hypothetical protein PRUPE_pp | not DE   | not DE   | not DE   | not DE  |
| EVM0012876 | LG1 | hypothetical protein PRUPE_pp | not DE   | not DE   | not DE   | not DE  |
| EVM0010374 | LG1 | hypothetical protein PRUPE_pp | not DE   | not DE   | not DE   | not DE  |
| EVM0011039 | LG1 | hypothetical protein PRUPE_pp | not DE   | not DE   | not DE   | not DE  |
| EVM0013996 | LG1 | hypothetical protein PRUPE_pp | not DE   | not DE   | not DE   | not DE  |
| EVM0017923 | LG1 | hypothetical protein PRUPE_pp | not DE   | not DE   | not DE   | not DE  |
| EVM0010790 | LG1 | hypothetical protein PRUPE_pp | not DE   | not DE   | not DE   | not DE  |
| EVM0004288 | LG1 | hypothetical protein PRUPE_pp | 1.128484 | 0.000404 | not DE   | not DE  |
| EVM0005835 | LG1 | hypothetical protein PRUPE_pp | not DE   | not DE   | not DE   | not DE  |
| EVM0001668 | LG1 | hypothetical protein PRUPE_pp | not DE   | not DE   | not DE   | not DE  |
| EVM0007589 | LG1 | hypothetical protein PRUPE_pp | not DE   | not DE   | not DE   | not DE  |
| EVM0002486 | LG1 | hypothetical protein PRUPE_pp | not DE   | not DE   | not DE   | not DE  |
| EVM0008219 | LG1 | hypothetical protein PRUPE_pp | not DE   | not DE   | not DE   | not DE  |
| EVM0001970 | LG1 | hypothetical protein PRUPE_pp | not DE   | not DE   | not DE   | not DE  |
| EVM0018231 | LG1 | hypothetical protein PRUPE_pp | not DE   | not DE   | not DE   | not DE  |
| EVM0015128 | LG1 | hypothetical protein PRUPE_pp | 1.124466 | 0.047209 | not DE   | not DE  |
| EVM0023457 | LG1 | hypothetical protein PRUPE_pp | not DE   | not DE   | not DE   | not DE  |
| EVM0009886 | LG1 | hypothetical protein PRUPE_pp | not DE   | not DE   | not DE   | not DE  |
| EVM0016463 | LG1 | hypothetical protein PRUPE_pp | not DE   | not DE   | not DE   | not DE  |
| EVM0000143 | LG1 | hypothetical protein PRUPE_pp | not DE   | not DE   | not DE   | not DE  |
| EVM0009234 | LG1 | hypothetical protein PRUPE_pp | not DE   | not DE   | not DE   | not DE  |
| EVM0018372 | LG1 | hypothetical protein PRUPE_pp | not DE   | not DE   | not DE   | not DE  |
| EVM0009296 | LG1 | hypothetical protein PRUPE_pp | not DE   | not DE   | not DE   | not DE  |
| EVM0020238 | LG1 | hypothetical protein PRUPE_pp | not DE   | not DE   | 1.147495 | #####   |
| EVM0002386 | LG1 | hypothetical protein PRUPE_pp | not DE   | not DE   | not DE   | not DE  |
| EVM0000204 | LG1 | hypothetical protein PRUPE_pp | 1.78836  | 0.001454 | not DE   | not DE  |
| EVM0011694 | LG1 | hypothetical protein PRUPE_pp | not DE   | not DE   | not DE   | not DE  |
| EVM0021510 | LG1 | hypothetical protein PRUPE_pp | not DE   | not DE   | not DE   | not DE  |
| EVM0008833 | LG1 | hypothetical protein PRUPE_pp | not DE   | not DE   | not DE   | not DE  |
| EVM0017760 | LG1 | hypothetical protein PRUPE_pp | not DE   | not DE   | not DE   | not DE  |
| EVM0014731 | LG1 | hypothetical protein PRUPE_pp | not DE   | not DE   | not DE   | not DE  |
| EVM0023619 | LG1 | hypothetical protein PRUPE_pp | not DE   | not DE   | not DE   | not DE  |
| EVM0005352 | LG1 | hypothetical protein PRUPE_pp | not DE   | not DE   | not DE   | not DE  |
| EVM0000343 | LG1 | hypothetical protein PRUPE_pp | not DE   | not DE   | not DE   | not DE  |
| EVM0000720 | LG1 | hypothetical protein PRUPE_pp | 1.459903 | 0.037412 | not DE   | not DE  |
| EVM0021458 | LG1 | hypothetical protein PRUPE_pp | not DE   | not DE   | not DE   | not DE  |
| EVM0021792 | LG1 | hypothetical protein PRUPE_pp | not DE   | not DE   | 2.147563 | 0.00361 |
| EVM0004522 | LG1 | hypothetical protein PRUPE_pp | not DE   | not DE   | not DE   | not DE  |
| EVM0000753 | LG1 | hypothetical protein PRUPE_pp | not DE   | not DE   | not DE   | not DE  |
| EVM0019480 | LG1 | hypothetical protein PRUPE_pp | not DE   | not DE   | not DE   | not DE  |
| EVM0022591 | LG1 | hypothetical protein RCOM_023 | not DE   | not DE   | not DE   | not DE  |
| EVM0009236 | LG1 | hypothetical protein VITISV_C | not DE   | not DE   | not DE   | not DE  |
| EVM0002922 | LG1 | hypothetical protein VITISV_C | not DE   | not DE   | not DE   | not DE  |
| EVM0019094 | LG1 | hypothetical protein VITISV_C | not DE   | not DE   | not DE   | not DE  |
| EVM0018592 | LG1 | hypothetical protein VITISV_C | not DE   | not DE   | not DE   | not DE  |
| EVM0018749 | LG1 | hypothetical protein VITISV_C | not DE   | not DE   | not DE   | not DE  |
| EVM0010718 | LG1 | hypothetical protein VITISV_C | not DE   | not DE   | not DE   | not DE  |
| EVM0005834 | LG1 | hypothetical protein VITISV_C | not DE   | not DE   | not DE   | not DE  |
| EVM0009961 | LG1 | hypothetical protein VITISV_C | not DE   | not DE   | not DE   | not DE  |
| EVM0004064 | LG1 | hypothetical protein VITISV_C | not DE   | not DE   | not DE   | not DE  |
| EVM0004500 | LG1 | hypothetical protein W97_0284 | not DE   | not DE   | not DE   | not DE  |

|            |     |                                |          |          |          |         |
|------------|-----|--------------------------------|----------|----------|----------|---------|
| EVM0006439 | LG1 | hypothetical protein glysoja   | not DE   | not DE   | not DE   | not DE  |
| EVM0020016 | LG1 | inducer of CBF expression 1    | not DE   | not DE   | not DE   | not DE  |
| EVM0004668 | LG1 | iron superoxide dismutase, pa  | not DE   | not DE   | not DE   | not DE  |
| EVM0022346 | LG1 | late elongated hypocotyl a     | not DE   | not DE   | not DE   | not DE  |
| EVM0002522 | LG1 | late embryogenesis abundant p  | not DE   | not DE   | not DE   | not DE  |
| EVM0024088 | LG1 | malate oxidoreductase family   | not DE   | not DE   | not DE   | not DE  |
| EVM0022066 | LG1 | maternal effect embryo arrest  | not DE   | not DE   | not DE   | not DE  |
| EVM0023652 | LG1 | maternal effect embryo arrest  | not DE   | not DE   | not DE   | not DE  |
| EVM0006783 | LG1 | mitochondrial alternative oxia | not DE   | not DE   | not DE   | not DE  |
| EVM0011668 | LG1 | monooxygenase, putative        | not DE   | not DE   | not DE   | not DE  |
| EVM0012791 | LG1 | nodulin 25 family protein      | not DE   | not DE   | not DE   | not DE  |
| EVM0023774 | LG1 | nucleoside diphosphate kinase  | not DE   | not DE   | not DE   | not DE  |
| EVM0018260 | LG1 | o-linked n-acetylglucosamine   | not DE   | not DE   | not DE   | not DE  |
| EVM0015650 | LG1 | o-methyltransferase, putative  | not DE   | not DE   | not DE   | not DE  |
| EVM0009796 | LG1 | pantoate-beta-alanine ligase,  | not DE   | not DE   | not DE   | not DE  |
| EVM0002992 | LG1 | pectin methylesterase          | not DE   | not DE   | not DE   | not DE  |
| EVM0003842 | LG1 | pectin methylesterase 5        | not DE   | not DE   | not DE   | not DE  |
| EVM0016731 | LG1 | pectin methylesterase 5        | not DE   | not DE   | not DE   | not DE  |
| EVM0021991 | LG1 | peptide chain release factor,  | not DE   | not DE   | not DE   | not DE  |
| EVM0007491 | LG1 | peptidoglycan-binding LysM do  | not DE   | not DE   | not DE   | not DE  |
| EVM0023416 | LG1 | peripheral-type benzodiazepin  | 2.978528 | 3.22E-05 | not DE   | not DE  |
| EVM0004279 | LG1 | phosphate transporter          | not DE   | not DE   | not DE   | not DE  |
| EVM0017558 | LG1 | phosphate transporter          | not DE   | not DE   | not DE   | not DE  |
| EVM0003931 | LG1 | phosphate transporter 1        | not DE   | not DE   | not DE   | not DE  |
| EVM0021809 | LG1 | plant/F20D21-34 protein        | not DE   | not DE   | not DE   | not DE  |
| EVM0018371 | LG1 | poly(A)-binding protein 1      | not DE   | not DE   | not DE   | not DE  |
| EVM0022918 | LG1 | protein binding protein, puta  | not DE   | not DE   | not DE   | not DE  |
| EVM0006603 | LG1 | proton-dependent oligopeptide  | not DE   | not DE   | not DE   | not DE  |
| EVM0000967 | LG1 | putative metal-nicotianamine   | not DE   | not DE   | not DE   | not DE  |
| EVM0017642 | LG1 | putative polyol transporter 4  | not DE   | not DE   | not DE   | not DE  |
| EVM0019541 | LG1 | pyruvate dehydrogenase, putat  | not DE   | not DE   | not DE   | not DE  |
| EVM0004575 | LG1 | respiratory burst oxidase C    | not DE   | not DE   | not DE   | not DE  |
| EVM0005811 | LG1 | ribosomal protein L17-like pr  | not DE   | not DE   | not DE   | not DE  |
| EVM0023952 | LG1 | ribosomal protein L29          | not DE   | not DE   | not DE   | not DE  |
| EVM0002028 | LG1 | ring 1                         | not DE   | not DE   | not DE   | not DE  |
| EVM0018991 | LG1 | ring finger protein, putative  | not DE   | not DE   | not DE   | not DE  |
| EVM0020644 | LG1 | ring finger protein, putative  | not DE   | not DE   | not DE   | not DE  |
| EVM0003550 | LG1 | s-receptor kinase, putative    | not DE   | not DE   | not DE   | not DE  |
| EVM0010800 | LG1 | s-receptor kinase, putative    | not DE   | not DE   | not DE   | not DE  |
| EVM0017465 | LG1 | s-receptor kinase, putative    | not DE   | not DE   | not DE   | not DE  |
| EVM0006166 | LG1 | sec10, putative                | not DE   | not DE   | not DE   | not DE  |
| EVM0013336 | LG1 | sec61 gamma subunit, putative  | not DE   | not DE   | not DE   | not DE  |
| EVM0015158 | LG1 | sec61 gamma subunit, putative  | not DE   | not DE   | not DE   | not DE  |
| EVM0020180 | LG1 | serine-threonine protein kina  | not DE   | not DE   | not DE   | not DE  |
| EVM0016858 | LG1 | sucrose synthase               | 2.161451 | 0.000644 | not DE   | not DE  |
| EVM0010629 | LG1 | sulfite oxidase                | not DE   | not DE   | not DE   | not DE  |
| EVM0015699 | LG1 | transketolase, putative        | not DE   | not DE   | -1.23146 | 0.00043 |
| EVM0017848 | LG1 | transketolase, putative        | -1.13047 | 0.036979 | not DE   | not DE  |
| EVM0024375 | LG1 | translation initiation factor  | not DE   | not DE   | not DE   | not DE  |
| EVM0005941 | LG1 | transport inhibitor response   | not DE   | not DE   | not DE   | not DE  |
| EVM0021757 | LG1 | transposase                    | not DE   | not DE   | not DE   | not DE  |
| EVM0001525 | LG1 | ubiquitin-conjugating enzyme   | not DE   | not DE   | not DE   | not DE  |
| EVM0014573 | LG1 | uncharacterized protein LOC10  | not DE   | not DE   | not DE   | not DE  |
| EVM0015262 | LG1 | uncharacterized protein LOC10  | not DE   | not DE   | not DE   | not DE  |

|            |     |                               |          |          |          |         |
|------------|-----|-------------------------------|----------|----------|----------|---------|
| EVM0017471 | LG1 | uncharacterized protein LOC10 | not DE   | not DE   | not DE   | not DE  |
| EVM0001936 | LG1 | uncharacterized protein LOC10 | not DE   | not DE   | not DE   | not DE  |
| EVM0000572 | LG1 | unknown protein               | not DE   | not DE   | not DE   | not DE  |
| EVM0000871 | LG1 | unknown protein               | not DE   | not DE   | not DE   | not DE  |
| EVM0001029 | LG1 | unknown protein               | not DE   | not DE   | not DE   | not DE  |
| EVM0001045 | LG1 | unknown protein               | not DE   | not DE   | not DE   | not DE  |
| EVM0001845 | LG1 | unknown protein               | not DE   | not DE   | not DE   | not DE  |
| EVM0002507 | LG1 | unknown protein               | not DE   | not DE   | not DE   | not DE  |
| EVM0002698 | LG1 | unknown protein               | -6.28166 | 5.34E-06 | not DE   | not DE  |
| EVM0002747 | LG1 | unknown protein               | not DE   | not DE   | not DE   | not DE  |
| EVM0003752 | LG1 | unknown protein               | not DE   | not DE   | not DE   | not DE  |
| EVM0005253 | LG1 | unknown protein               | not DE   | not DE   | not DE   | not DE  |
| EVM0005470 | LG1 | unknown protein               | not DE   | not DE   | not DE   | not DE  |
| EVM0005786 | LG1 | unknown protein               | not DE   | not DE   | not DE   | not DE  |
| EVM0006612 | LG1 | unknown protein               | not DE   | not DE   | not DE   | not DE  |
| EVM0006872 | LG1 | unknown protein               | not DE   | not DE   | not DE   | not DE  |
| EVM0007074 | LG1 | unknown protein               | not DE   | not DE   | not DE   | not DE  |
| EVM0007209 | LG1 | unknown protein               | not DE   | not DE   | not DE   | not DE  |
| EVM0007313 | LG1 | unknown protein               | not DE   | not DE   | 1.638332 | 0.00015 |
| EVM0007815 | LG1 | unknown protein               | not DE   | not DE   | not DE   | not DE  |
| EVM0007967 | LG1 | unknown protein               | not DE   | not DE   | not DE   | not DE  |
| EVM0009185 | LG1 | unknown protein               | not DE   | not DE   | not DE   | not DE  |
| EVM0009768 | LG1 | unknown protein               | not DE   | not DE   | not DE   | not DE  |
| EVM0010569 | LG1 | unknown protein               | not DE   | not DE   | not DE   | not DE  |
| EVM0010659 | LG1 | unknown protein               | not DE   | not DE   | not DE   | not DE  |
| EVM0011869 | LG1 | unknown protein               | not DE   | not DE   | not DE   | not DE  |
| EVM0012097 | LG1 | unknown protein               | not DE   | not DE   | not DE   | not DE  |
| EVM0012427 | LG1 | unknown protein               | not DE   | not DE   | not DE   | not DE  |
| EVM0012460 | LG1 | unknown protein               | not DE   | not DE   | not DE   | not DE  |
| EVM0014313 | LG1 | unknown protein               | not DE   | not DE   | not DE   | not DE  |
| EVM0015091 | LG1 | unknown protein               | not DE   | not DE   | not DE   | not DE  |
| EVM0016284 | LG1 | unknown protein               | not DE   | not DE   | not DE   | not DE  |
| EVM0016981 | LG1 | unknown protein               | not DE   | not DE   | not DE   | not DE  |
| EVM0017419 | LG1 | unknown protein               | not DE   | not DE   | not DE   | not DE  |
| EVM0017681 | LG1 | unknown protein               | not DE   | not DE   | not DE   | not DE  |
| EVM0019067 | LG1 | unknown protein               | not DE   | not DE   | not DE   | not DE  |
| EVM0019119 | LG1 | unknown protein               | not DE   | not DE   | not DE   | not DE  |
| EVM0019424 | LG1 | unknown protein               | not DE   | not DE   | not DE   | not DE  |
| EVM0020696 | LG1 | unknown protein               | not DE   | not DE   | not DE   | not DE  |
| EVM0020824 | LG1 | unknown protein               | not DE   | not DE   | not DE   | not DE  |
| EVM0021416 | LG1 | unknown protein               | not DE   | not DE   | not DE   | not DE  |
| EVM0023272 | LG1 | unknown protein               | not DE   | not DE   | not DE   | not DE  |
| EVM0023797 | LG1 | unknown protein               | not DE   | not DE   | not DE   | not DE  |
| EVM0000237 | LG1 | unnamed protein product       | not DE   | not DE   | not DE   | not DE  |
| EVM0000388 | LG1 | unnamed protein product       | not DE   | not DE   | not DE   | not DE  |
| EVM0000395 | LG1 | unnamed protein product       | not DE   | not DE   | not DE   | not DE  |
| EVM0000562 | LG1 | unnamed protein product       | not DE   | not DE   | not DE   | not DE  |
| EVM0001342 | LG1 | unnamed protein product       | not DE   | not DE   | not DE   | not DE  |
| EVM0001444 | LG1 | unnamed protein product       | not DE   | not DE   | not DE   | not DE  |
| EVM0001740 | LG1 | unnamed protein product       | not DE   | not DE   | not DE   | not DE  |
| EVM0003227 | LG1 | unnamed protein product       | not DE   | not DE   | not DE   | not DE  |
| EVM0004252 | LG1 | unnamed protein product       | not DE   | not DE   | not DE   | not DE  |
| EVM0004835 | LG1 | unnamed protein product       | not DE   | not DE   | not DE   | not DE  |
| EVM0005735 | LG1 | unnamed protein product       | not DE   | not DE   | not DE   | not DE  |

|            |      |                               |          |          |          |         |
|------------|------|-------------------------------|----------|----------|----------|---------|
| EVM0006902 | LG1  | unnamed protein product       | not DE   | not DE   | not DE   | not DE  |
| EVM0009396 | LG1  | unnamed protein product       | not DE   | not DE   | not DE   | not DE  |
| EVM0011334 | LG1  | unnamed protein product       | 1.705445 | 0.002351 | not DE   | not DE  |
| EVM0011388 | LG1  | unnamed protein product       | not DE   | not DE   | not DE   | not DE  |
| EVM0011828 | LG1  | unnamed protein product       | -2.30687 | 0.039766 | not DE   | not DE  |
| EVM0012972 | LG1  | unnamed protein product       | not DE   | not DE   | not DE   | not DE  |
| EVM0013483 | LG1  | unnamed protein product       | not DE   | not DE   | not DE   | not DE  |
| EVM0013925 | LG1  | unnamed protein product       | not DE   | not DE   | not DE   | not DE  |
| EVM0014332 | LG1  | unnamed protein product       | not DE   | not DE   | not DE   | not DE  |
| EVM0014691 | LG1  | unnamed protein product       | not DE   | not DE   | not DE   | not DE  |
| EVM0014927 | LG1  | unnamed protein product       | not DE   | not DE   | not DE   | not DE  |
| EVM0015181 | LG1  | unnamed protein product       | not DE   | not DE   | not DE   | not DE  |
| EVM0016327 | LG1  | unnamed protein product       | not DE   | not DE   | not DE   | not DE  |
| EVM0016470 | LG1  | unnamed protein product       | -1.94754 | 3.91E-06 | not DE   | not DE  |
| EVM0016522 | LG1  | unnamed protein product       | not DE   | not DE   | not DE   | not DE  |
| EVM0016666 | LG1  | unnamed protein product       | not DE   | not DE   | not DE   | not DE  |
| EVM0016817 | LG1  | unnamed protein product       | not DE   | not DE   | not DE   | not DE  |
| EVM0017159 | LG1  | unnamed protein product       | not DE   | not DE   | not DE   | not DE  |
| EVM0018126 | LG1  | unnamed protein product       | not DE   | not DE   | not DE   | not DE  |
| EVM0018132 | LG1  | unnamed protein product       | not DE   | not DE   | not DE   | not DE  |
| EVM0018281 | LG1  | unnamed protein product       | not DE   | not DE   | 1.23806  | 0.03454 |
| EVM0018977 | LG1  | unnamed protein product       | not DE   | not DE   | not DE   | not DE  |
| EVM0019422 | LG1  | unnamed protein product       | not DE   | not DE   | not DE   | not DE  |
| EVM0019536 | LG1  | unnamed protein product       | not DE   | not DE   | -1.34987 | #####   |
| EVM0019570 | LG1  | unnamed protein product       | not DE   | not DE   | not DE   | not DE  |
| EVM0019574 | LG1  | unnamed protein product       | not DE   | not DE   | not DE   | not DE  |
| EVM0020855 | LG1  | unnamed protein product       | not DE   | not DE   | not DE   | not DE  |
| EVM0020858 | LG1  | unnamed protein product       | not DE   | not DE   | not DE   | not DE  |
| EVM0021167 | LG1  | unnamed protein product       | -1.17931 | 0.021841 | not DE   | not DE  |
| EVM0022054 | LG1  | unnamed protein product       | not DE   | not DE   | not DE   | not DE  |
| EVM0022397 | LG1  | unnamed protein product       | not DE   | not DE   | not DE   | not DE  |
| EVM0023078 | LG1  | unnamed protein product       | not DE   | not DE   | not DE   | not DE  |
| EVM0023787 | LG1  | unnamed protein product       | not DE   | not DE   | not DE   | not DE  |
| EVM0024099 | LG1  | unnamed protein product       | 1.40146  | 0.037705 | not DE   | not DE  |
| EVM0024184 | LG1  | unnamed protein product       | 3.629074 | 3.76E-08 | 1.278577 | 0.02163 |
| EVM0001021 | LG1  | zinc finger family protein    | not DE   | not DE   | not DE   | not DE  |
| EVM0022376 | LG1  | zinc finger family protein    | not DE   | not DE   | not DE   | not DE  |
| EVM0019058 | LG1  | zinc finger protein, putative | not DE   | not DE   | not DE   | not DE  |
| EVM0007068 | LG10 | (+)-neomenthol dehydrogenase  | not DE   | not DE   | not DE   | not DE  |
| EVM0012922 | LG10 | (+)-neomenthol dehydrogenase  | not DE   | not DE   | not DE   | not DE  |
| EVM0004710 | LG10 | 1-aminocyclopropane-1-carbox  | not DE   | not DE   | not DE   | not DE  |
| EVM0020891 | LG10 | 40S ribosomal protein S24-2   | not DE   | not DE   | not DE   | not DE  |
| EVM0021264 | LG10 | 40S ribosomal protein S6-like | not DE   | not DE   | not DE   | not DE  |
| EVM0022629 | LG10 | 54S ribosomal protein L12, m  | not DE   | not DE   | not DE   | not DE  |
| EVM0000987 | LG10 | 60S acidic ribosomal protein  | not DE   | not DE   | not DE   | not DE  |
| EVM0004382 | LG10 | 60S ribosomal protein L30-li  | not DE   | not DE   | not DE   | not DE  |
| EVM0011483 | LG10 | 8-hydroxygeraniol dehydrogen  | 1.978908 | 0.02337  | not DE   | not DE  |
| EVM0001882 | LG10 | ADP-ribosylation factor-like  | not DE   | not DE   | not DE   | not DE  |
| EVM0021692 | LG10 | AP2-like ethylene-responsive  | not DE   | not DE   | not DE   | not DE  |
| EVM0002413 | LG10 | AP2-like ethylene-responsive  | not DE   | not DE   | not DE   | not DE  |
| EVM0006542 | LG10 | ATP-dependent DNA helicase C  | not DE   | not DE   | not DE   | not DE  |
| EVM0014662 | LG10 | BEL1-like homeodomain protei  | not DE   | not DE   | not DE   | not DE  |
| EVM0007648 | LG10 | BTB/POZ domain-containing pr  | -1.1482  | 0.046199 | not DE   | not DE  |
| EVM0013015 | LG10 | BTB/POZ domain-containing pr  | not DE   | not DE   | not DE   | not DE  |



|            |      |                              |          |          |          |         |
|------------|------|------------------------------|----------|----------|----------|---------|
| EVM0015981 | LG10 | BTB/POZ domain-containing pr | not DE   | not DE   | not DE   | not DE  |
| EVM0017346 | LG10 | BTB/POZ domain-containing pr | not DE   | not DE   | not DE   | not DE  |
| EVM0003205 | LG10 | CBS domain-containing protei | not DE   | not DE   | not DE   | not DE  |
| EVM0008744 | LG10 | CBS domain-containing protei | not DE   | not DE   | not DE   | not DE  |
| EVM0020098 | LG10 | CCR4-NOT transcription compl | not DE   | not DE   | not DE   | not DE  |
| EVM0019243 | LG10 | CDK5RAP1-like protein-like i | not DE   | not DE   | not DE   | not DE  |
| EVM0011362 | LG10 | CLK4-associating serine/argi | not DE   | not DE   | not DE   | not DE  |
| EVM0018917 | LG10 | DDT domain-containing protei | not DE   | not DE   | not DE   | not DE  |
| EVM0011837 | LG10 | DNA excision repair protein  | not DE   | not DE   | not DE   | not DE  |
| EVM0002792 | LG10 | DNA polymerase alpha catalyt | not DE   | not DE   | not DE   | not DE  |
| EVM0006685 | LG10 | DNA polymerase delta catalyt | not DE   | not DE   | not DE   | not DE  |
| EVM0002124 | LG10 | DNA topoisomerase 3-alpha-li | not DE   | not DE   | not DE   | not DE  |
| EVM0014553 | LG10 | DNA topoisomerase 3-alpha-li | not DE   | not DE   | not DE   | not DE  |
| EVM0013350 | LG10 | DNA-(apurinic or apyrimidini | not DE   | not DE   | not DE   | not DE  |
| EVM0006441 | LG10 | DNA-directed RNA polymerase  | not DE   | not DE   | not DE   | not DE  |
| EVM0006367 | LG10 | E3 ubiquitin-protein ligase  | not DE   | not DE   | not DE   | not DE  |
| EVM0007513 | LG10 | E3 ubiquitin-protein ligase  | not DE   | not DE   | not DE   | not DE  |
| EVM0006129 | LG10 | E3 ubiquitin-protein ligase  | not DE   | not DE   | 1.087773 | 0.00742 |
| EVM0011100 | LG10 | E3 ubiquitin-protein ligase  | not DE   | not DE   | not DE   | not DE  |
| EVM0004130 | LG10 | EPIDERMAL PATTERNING FACTOR- | not DE   | not DE   | not DE   | not DE  |
| EVM0015512 | LG10 | F-box protein At4g35930-like | not DE   | not DE   | not DE   | not DE  |
| EVM0021829 | LG10 | F-box protein SKIP2-like     | not DE   | not DE   | not DE   | not DE  |
| EVM0009578 | LG10 | F-box-like/WD repeat-contain | not DE   | not DE   | not DE   | not DE  |
| EVM0006956 | LG10 | G-type lectin S-receptor-lik | not DE   | not DE   | not DE   | not DE  |
| EVM0013213 | LG10 | G2/mitotic-specific cyclin-l | not DE   | not DE   | 2.985877 | 0.006   |
| EVM0023474 | LG10 | GATA transcription factor 5- | not DE   | not DE   | not DE   | not DE  |
| EVM0006269 | LG10 | GPI ethanolamine phosphate t | not DE   | not DE   | not DE   | not DE  |
| EVM0002131 | LG10 | GTP-binding protein At3g4972 | not DE   | not DE   | not DE   | not DE  |
| EVM0020218 | LG10 | L-ascorbate oxidase homolog  | not DE   | not DE   | not DE   | not DE  |
| EVM0008233 | LG10 | L-ascorbate oxidase-like     | not DE   | not DE   | not DE   | not DE  |
| EVM0002504 | LG10 | L-type lectin-domain contain | not DE   | not DE   | not DE   | not DE  |
| EVM0004701 | LG10 | L-type lectin-domain contain | not DE   | not DE   | not DE   | not DE  |
| EVM0014046 | LG10 | L-type lectin-domain contain | not DE   | not DE   | not DE   | not DE  |
| EVM0018040 | LG10 | LMBR1 domain-containing prot | not DE   | not DE   | not DE   | not DE  |
| EVM0011879 | LG10 | LOB domain-containing protei | -2.42446 | 0.000351 | not DE   | not DE  |
| EVM0009536 | LG10 | LOW QUALITY PROTEIN: callose | not DE   | not DE   | not DE   | not DE  |
| EVM0020152 | LG10 | LOW QUALITY PROTEIN: cytochr | not DE   | not DE   | not DE   | not DE  |
| EVM0004062 | LG10 | LOW QUALITY PROTEIN: putativ | not DE   | not DE   | not DE   | not DE  |
| EVM0005485 | LG10 | LOW QUALITY PROTEIN: ras-rel | not DE   | not DE   | 1.262735 | 0.00763 |
| EVM0006593 | LG10 | LOW QUALITY PROTEIN: unchara | not DE   | not DE   | not DE   | not DE  |
| EVM0010543 | LG10 | LRR receptor-like serine/thr | not DE   | not DE   | not DE   | not DE  |
| EVM0007510 | LG10 | MADS-box transcription facto | not DE   | not DE   | not DE   | not DE  |
| EVM0006235 | LG10 | MADS-box transcription facto | not DE   | not DE   | not DE   | not DE  |
| EVM0007403 | LG10 | MIP18 family protein Atlg683 | not DE   | not DE   | not DE   | not DE  |
| EVM0019757 | LG10 | MIP18 family protein Atlg683 | not DE   | not DE   | not DE   | not DE  |
| EVM0000956 | LG10 | MLO-like protein 4-like      | not DE   | not DE   | not DE   | not DE  |
| EVM0001346 | LG10 | NADH dehydrogenase           | not DE   | not DE   | not DE   | not DE  |
| EVM0008451 | LG10 | NADPH-dependent 1-acyldihydr | not DE   | not DE   | not DE   | not DE  |
| EVM0012280 | LG10 | NADPH-dependent 1-acyldihydr | -1.58188 | 0.024914 | not DE   | not DE  |
| EVM0015057 | LG10 | NEDD8-conjugating enzyme Ubc | not DE   | not DE   | not DE   | not DE  |
| EVM0016741 | LG10 | NEP1-interacting protein 1-l | not DE   | not DE   | not DE   | not DE  |
| EVM0001962 | LG10 | OTU domain-containing protei | not DE   | not DE   | not DE   | not DE  |
| EVM0021511 | LG10 | PHD finger protein Atlg33420 | 1.006997 | 0.000707 | not DE   | not DE  |
| EVM0004285 | LG10 | RING-H2 finger protein ATL52 | not DE   | not DE   | not DE   | not DE  |

|            |      |                              |          |          |          |         |
|------------|------|------------------------------|----------|----------|----------|---------|
| EVM0004755 | LG10 | RING-H2 finger protein ATL8- | not DE   | not DE   | not DE   | not DE  |
| EVM0006680 | LG10 | RNA polymerase I-specific tr | not DE   | not DE   | not DE   | not DE  |
| EVM0012201 | LG10 | RPM1-interacting protein 4-l | not DE   | not DE   | not DE   | not DE  |
| EVM0002455 | LG10 | S-adenosylmethionine carrier | not DE   | not DE   | not DE   | not DE  |
| EVM0010045 | LG10 | SAL1 phosphatase-like        | not DE   | not DE   | not DE   | not DE  |
| EVM0023969 | LG10 | SAL1 phosphatase-like        | not DE   | not DE   | not DE   | not DE  |
| EVM0017151 | LG10 | SKP1-like protein 1B         | not DE   | not DE   | not DE   | not DE  |
| EVM0017688 | LG10 | SRSF protein kinase 1-like   | not DE   | not DE   | not DE   | not DE  |
| EVM0000745 | LG10 | TMV resistance protein N-lik | not DE   | not DE   | not DE   | not DE  |
| EVM0005288 | LG10 | TMV resistance protein N-lik | not DE   | not DE   | not DE   | not DE  |
| EVM0003709 | LG10 | U-box domain-containing prot | not DE   | not DE   | not DE   | not DE  |
| EVM0019800 | LG10 | U-box domain-containing prot | not DE   | not DE   | not DE   | not DE  |
| EVM0016343 | LG10 | U-box domain-containing prot | not DE   | not DE   | not DE   | not DE  |
| EVM0024318 | LG10 | U1 small nuclear ribonucleop | not DE   | not DE   | not DE   | not DE  |
| EVM0007948 | LG10 | UDP-galactose transporter 2- | -1.66678 | 0.023865 | not DE   | not DE  |
| EVM0003544 | LG10 | UDP-galactose transporter 2- | not DE   | not DE   | not DE   | not DE  |
| EVM0013919 | LG10 | UDP-glycosyltransferase 85A3 | 2.649425 | 9.91E-06 | not DE   | not DE  |
| EVM0002417 | LG10 | UDP-glycosyltransferase 87A1 | not DE   | not DE   | not DE   | not DE  |
| EVM0004781 | LG10 | UDP-glycosyltransferase 87A1 | not DE   | not DE   | not DE   | not DE  |
| EVM0006053 | LG10 | UDP-glycosyltransferase 87A1 | not DE   | not DE   | not DE   | not DE  |
| EVM0016842 | LG10 | UDP-glycosyltransferase 87A1 | not DE   | not DE   | not DE   | not DE  |
| EVM0013044 | LG10 | UPF0183 protein At3g51130 is | not DE   | not DE   | not DE   | not DE  |
| EVM0017138 | LG10 | UPF0235 protein C15orf40     | not DE   | not DE   | not DE   | not DE  |
| EVM0003634 | LG10 | UPF0483 protein AGAP003155   | not DE   | not DE   | not DE   | not DE  |
| EVM0011979 | LG10 | UPF0483 protein AGAP003155   | not DE   | not DE   | not DE   | not DE  |
| EVM0013240 | LG10 | UPF0483 protein AGAP003155   | not DE   | not DE   | not DE   | not DE  |
| EVM0011449 | LG10 | UPF0553 protein-like         | -1.52088 | 0.001528 | not DE   | not DE  |
| EVM0008782 | LG10 | WD repeat domain-containing  | not DE   | not DE   | not DE   | not DE  |
| EVM0005494 | LG10 | acyl-coenzyme A thioesterase | not DE   | not DE   | not DE   | not DE  |
| EVM0013983 | LG10 | adipocyte plasma membrane-as | 1.962235 | 0.009173 | not DE   | not DE  |
| EVM0018283 | LG10 | adiponectin receptor protein | not DE   | not DE   | not DE   | not DE  |
| EVM0009826 | LG10 | aldehyde dehydrogenase famil | not DE   | not DE   | not DE   | not DE  |
| EVM0004250 | LG10 | amino acid permease 2-like   | -3.4775  | 0.006494 | not DE   | not DE  |
| EVM0006568 | LG10 | ammonium transporter 3 membe | not DE   | not DE   | not DE   | not DE  |
| EVM0006501 | LG10 | ammonium transporter 3 membe | not DE   | not DE   | not DE   | not DE  |
| EVM0015428 | LG10 | annexin D2-like              | not DE   | not DE   | not DE   | not DE  |
| EVM0012933 | LG10 | aspartic proteinase-like pro | not DE   | not DE   | not DE   | not DE  |
| EVM0010101 | LG10 | aspartic proteinase-like pro | not DE   | not DE   | not DE   | not DE  |
| EVM0009830 | LG10 | aspartic proteinase-like pro | not DE   | not DE   | not DE   | not DE  |
| EVM0007779 | LG10 | auxin-induced protein X10A-l | not DE   | not DE   | not DE   | not DE  |
| EVM0009321 | LG10 | auxin-responsive protein IAA | not DE   | not DE   | 1.003747 | 0.00073 |
| EVM0003563 | LG10 | bifunctional epoxide hydrola | not DE   | not DE   | not DE   | not DE  |
| EVM0019959 | LG10 | bifunctional riboflavin bios | not DE   | not DE   | not DE   | not DE  |
| EVM0015935 | LG10 | branched-chain-amino-acid am | not DE   | not DE   | not DE   | not DE  |
| EVM0000480 | LG10 | casein kinase II subunit alp | not DE   | not DE   | not DE   | not DE  |
| EVM0012278 | LG10 | cellulose synthase A catalyt | not DE   | not DE   | not DE   | not DE  |
| EVM0022225 | LG10 | cellulose synthase A catalyt | not DE   | not DE   | not DE   | not DE  |
| EVM0013878 | LG10 | chaperone protein dnaJ 20, c | not DE   | not DE   | not DE   | not DE  |
| EVM0003615 | LG10 | chitinase 2-like             | not DE   | not DE   | not DE   | not DE  |
| EVM0008724 | LG10 | chloride channel protein CLC | not DE   | not DE   | not DE   | not DE  |
| EVM0001230 | LG10 | cinnamyl alcohol dehydrogena | not DE   | not DE   | not DE   | not DE  |
| EVM0023124 | LG10 | classical arabinogalactan pr | not DE   | not DE   | not DE   | not DE  |
| EVM0004178 | LG10 | cleft lip and palate transme | 1.842685 | 3.78E-10 | not DE   | not DE  |
| EVM0021389 | LG10 | cyclin-D3-2-like             | not DE   | not DE   | not DE   | not DE  |

|            |      |                               |        |        |          |         |
|------------|------|-------------------------------|--------|--------|----------|---------|
| EVM0021114 | LG10 | cyclin-D5-1-like              | not DE | not DE | not DE   | not DE  |
| EVM0024100 | LG10 | cysteine desulfurase 1, mito  | not DE | not DE | not DE   | not DE  |
| EVM0004992 | LG10 | cysteine desulfurase 2, chlo  | not DE | not DE | not DE   | not DE  |
| EVM0017602 | LG10 | cysteine desulfurase 2, chlo  | not DE | not DE | not DE   | not DE  |
| EVM0019456 | LG10 | cysteine proteinase RD21a-li  | not DE | not DE | not DE   | not DE  |
| EVM0017087 | LG10 | cysteine-rich and transmembr  | not DE | not DE | 1.018943 | 0.00391 |
| EVM0022788 | LG10 | cytochrome P450 86B1          | not DE | not DE | not DE   | not DE  |
| EVM0000344 | LG10 | cytochrome P450 90B1-like is  | not DE | not DE | not DE   | not DE  |
| EVM0013205 | LG10 | cytochrome P450 CYP736A12-li  | not DE | not DE | not DE   | not DE  |
| EVM0022769 | LG10 | dimethyladenosine transferas  | not DE | not DE | not DE   | not DE  |
| EVM0000255 | LG10 | embryonic protein DC-8 isofo  | not DE | not DE | not DE   | not DE  |
| EVM0015396 | LG10 | ethylene-responsive transcri  | not DE | not DE | -1.47266 | 0.03794 |
| EVM0022696 | LG10 | ethylene-responsive transcri  | not DE | not DE | not DE   | not DE  |
| EVM0024122 | LG10 | ethylene-responsive transcri  | not DE | not DE | not DE   | not DE  |
| EVM0018134 | LG10 | eukaryotic translation initi  | not DE | not DE | not DE   | not DE  |
| EVM0010687 | LG10 | exosome complex exonuclease   | not DE | not DE | not DE   | not DE  |
| EVM0021507 | LG10 | extra-large guanine nucleoti  | not DE | not DE | not DE   | not DE  |
| EVM0002673 | LG10 | extradiol ring-cleavage diox  | not DE | not DE | not DE   | not DE  |
| EVM0002243 | LG10 | fasciclin-like arabinogalact  | not DE | not DE | not DE   | not DE  |
| EVM0002684 | LG10 | ferrochelataase-2, chloroplas | not DE | not DE | not DE   | not DE  |
| EVM0009249 | LG10 | filament-like plant protein   | not DE | not DE | not DE   | not DE  |
| EVM0017952 | LG10 | formin-like protein 6-like    | not DE | not DE | not DE   | not DE  |
| EVM0016976 | LG10 | fructose-bisphosphate aldola  | not DE | not DE | not DE   | not DE  |
| EVM0009227 | LG10 | ganglioside-induced differen  | not DE | not DE | not DE   | not DE  |
| EVM0008174 | LG10 | geminivirus Rep-interacting   | not DE | not DE | not DE   | not DE  |
| EVM0024205 | LG10 | glucan 1,3-beta-glucosidase   | not DE | not DE | not DE   | not DE  |
| EVM0020304 | LG10 | glucan 1,3-beta-glucosidase   | not DE | not DE | not DE   | not DE  |
| EVM0007761 | LG10 | glutamate receptor 3.6-like   | not DE | not DE | not DE   | not DE  |
| EVM0015576 | LG10 | growth-regulating factor 1-l  | not DE | not DE | not DE   | not DE  |
| EVM0008366 | LG10 | heat shock 70 kDa protein 6,  | not DE | not DE | -1.18236 | 0.00378 |
| EVM0023653 | LG10 | heavy metal-associated isopr  | not DE | not DE | not DE   | not DE  |
| EVM0003275 | LG10 | heterogeneous nuclear ribonu  | not DE | not DE | not DE   | not DE  |
| EVM0005909 | LG10 | histone H3.v1-like            | not DE | not DE | not DE   | not DE  |
| EVM0009398 | LG10 | histone H3.v1-like            | not DE | not DE | not DE   | not DE  |
| EVM0014155 | LG10 | histone-lysine N-methyltrans  | not DE | not DE | not DE   | not DE  |
| EVM0004011 | LG10 | homeobox-leucine zipper prot  | not DE | not DE | not DE   | not DE  |
| EVM0021197 | LG10 | isocitrate dehydrogenase      | not DE | not DE | not DE   | not DE  |
| EVM0005394 | LG10 | isoflavone 2'&-hydroxyla      | not DE | not DE | not DE   | not DE  |
| EVM0009825 | LG10 | isoflavone 2'&-hydroxyla      | not DE | not DE | not DE   | not DE  |
| EVM0010488 | LG10 | isoflavone 2'&-hydroxyla      | not DE | not DE | not DE   | not DE  |
| EVM0014837 | LG10 | isoflavone 2'&-hydroxyla      | not DE | not DE | not DE   | not DE  |
| EVM0017192 | LG10 | kinesin-like calmodulin-bind  | not DE | not DE | not DE   | not DE  |
| EVM0004204 | LG10 | kinesin-like protein KIF19-l  | not DE | not DE | not DE   | not DE  |
| EVM0017566 | LG10 | kinesin-like protein KIF19-l  | not DE | not DE | not DE   | not DE  |
| EVM0005274 | LG10 | kinesin-like protein KIF3A-l  | not DE | not DE | 2.506864 | 0.00891 |
| EVM0001771 | LG10 | lanC-like protein GCL1-like   | not DE | not DE | not DE   | not DE  |
| EVM0024541 | LG10 | low affinity sulfate transpo  | not DE | not DE | not DE   | not DE  |
| EVM0018699 | LG10 | lysosomal Pro-X carboxypepti  | not DE | not DE | not DE   | not DE  |
| EVM0002470 | LG10 | lysosomal alpha-mannosidase-  | not DE | not DE | not DE   | not DE  |
| EVM0008545 | LG10 | magnesium-dependent phosphat  | not DE | not DE | not DE   | not DE  |
| EVM0016129 | LG10 | mechanosensitive ion channel  | not DE | not DE | not DE   | not DE  |
| EVM0011986 | LG10 | methionine aminopeptidase 1D  | not DE | not DE | not DE   | not DE  |
| EVM0023401 | LG10 | methylmalonate-semialdehyde   | not DE | not DE | not DE   | not DE  |
| EVM0003368 | LG10 | mitochondrial Rho GTPase 1    | not DE | not DE | not DE   | not DE  |

|            |      |                              |          |          |        |        |
|------------|------|------------------------------|----------|----------|--------|--------|
| EVM0008789 | LG10 | mitochondrial Rho GTPase 1   | not DE   | not DE   | not DE | not DE |
| EVM0018875 | LG10 | mitochondrial phosphate carn | not DE   | not DE   | not DE | not DE |
| EVM0019226 | LG10 | mitochondrial phosphate carn | not DE   | not DE   | not DE | not DE |
| EVM0002221 | LG10 | mitochondrial translation op | not DE   | not DE   | not DE | not DE |
| EVM0024197 | LG10 | mitogen-activated protein ki | -2.00459 | 0.01273  | not DE | not DE |
| EVM0024539 | LG10 | mitogen-activated protein ki | not DE   | not DE   | not DE | not DE |
| EVM0003921 | LG10 | mortality factor 4-like prot | not DE   | not DE   | not DE | not DE |
| EVM0003824 | LG10 | neutral alpha-glucosidase AB | not DE   | not DE   | not DE | not DE |
| EVM0000305 | LG10 | nicotinate phosphoribosyltra | not DE   | not DE   | not DE | not DE |
| EVM0023695 | LG10 | nodulation receptor kinase-l | not DE   | not DE   | not DE | not DE |
| EVM0008847 | LG10 | non-structural maintenance c | not DE   | not DE   | not DE | not DE |
| EVM0022409 | LG10 | non-structural maintenance c | not DE   | not DE   | not DE | not DE |
| EVM0006613 | LG10 | nuclear transcription factor | not DE   | not DE   | not DE | not DE |
| EVM0015418 | LG10 | nucleolin-like               | not DE   | not DE   | not DE | not DE |
| EVM0017542 | LG10 | ocs element-binding factor l | not DE   | not DE   | not DE | not DE |
| EVM0015054 | LG10 | pentafunctional AROM polypep | not DE   | not DE   | not DE | not DE |
| EVM0000688 | LG10 | pentatricopeptide repeat-con | not DE   | not DE   | not DE | not DE |
| EVM0011647 | LG10 | pentatricopeptide repeat-con | not DE   | not DE   | not DE | not DE |
| EVM0006392 | LG10 | pentatricopeptide repeat-con | 1.243687 | 0.021418 | not DE | not DE |
| EVM0001837 | LG10 | pentatricopeptide repeat-con | 1.459152 | 0.011492 | not DE | not DE |
| EVM0020306 | LG10 | pentatricopeptide repeat-con | 2.201049 | 0.010761 | not DE | not DE |
| EVM0012282 | LG10 | pentatricopeptide repeat-con | 1.303307 | 0.03222  | not DE | not DE |
| EVM0003135 | LG10 | pentatricopeptide repeat-con | not DE   | not DE   | not DE | not DE |
| EVM0019547 | LG10 | pentatricopeptide repeat-con | not DE   | not DE   | not DE | not DE |
| EVM0004502 | LG10 | pentatricopeptide repeat-con | not DE   | not DE   | not DE | not DE |
| EVM0012371 | LG10 | pentatricopeptide repeat-con | not DE   | not DE   | not DE | not DE |
| EVM0000271 | LG10 | pentatricopeptide repeat-con | 2.147417 | 0.011753 | not DE | not DE |
| EVM0016427 | LG10 | pentatricopeptide repeat-con | not DE   | not DE   | not DE | not DE |
| EVM0020925 | LG10 | peptidyl-prolyl cis-trans is | not DE   | not DE   | not DE | not DE |
| EVM0012618 | LG10 | peptidyl-prolyl cis-trans is | not DE   | not DE   | not DE | not DE |
| EVM0002414 | LG10 | periaxin-like                | not DE   | not DE   | not DE | not DE |
| EVM0000187 | LG10 | peroxidase 10-like           | not DE   | not DE   | not DE | not DE |
| EVM0007974 | LG10 | phosducin-like protein 3-lik | not DE   | not DE   | not DE | not DE |
| EVM0005375 | LG10 | phosphatidylinositol 3,4,5-t | not DE   | not DE   | not DE | not DE |
| EVM0009662 | LG10 | phosphatidylinositol/phospha | not DE   | not DE   | not DE | not DE |
| EVM0012160 | LG10 | phosphoenolpyruvate carboxyk | not DE   | not DE   | not DE | not DE |
| EVM0024288 | LG10 | phosphoenolpyruvate carboxyk | not DE   | not DE   | not DE | not DE |
| EVM0012920 | LG10 | phosphoinositide phosphatase | -1.04618 | 0.00018  | not DE | not DE |
| EVM0019150 | LG10 | phosphoserine aminotransfera | not DE   | not DE   | not DE | not DE |
| EVM0007900 | LG10 | phytosulfokines 3            | 2.446394 | 0.001996 | not DE | not DE |
| EVM0016106 | LG10 | plant intracellular Ras-grou | not DE   | not DE   | not DE | not DE |
| EVM0013555 | LG10 | polyadenylate-binding protei | not DE   | not DE   | not DE | not DE |
| EVM0018523 | LG10 | probable ATP synthase 24 kDa | not DE   | not DE   | not DE | not DE |
| EVM0009934 | LG10 | probable LRR receptor-like s | not DE   | not DE   | not DE | not DE |
| EVM0013190 | LG10 | probable LRR receptor-like s | not DE   | not DE   | not DE | not DE |
| EVM0017842 | LG10 | probable LRR receptor-like s | not DE   | not DE   | not DE | not DE |
| EVM0007134 | LG10 | probable WRKY transcription  | not DE   | not DE   | not DE | not DE |
| EVM0015892 | LG10 | probable WRKY transcription  | not DE   | not DE   | not DE | not DE |
| EVM0019692 | LG10 | probable amino-acid acetyltr | not DE   | not DE   | not DE | not DE |
| EVM0001478 | LG10 | probable beta-1,4-xylosyltra | not DE   | not DE   | not DE | not DE |
| EVM0013374 | LG10 | probable calcium-binding pro | not DE   | not DE   | not DE | not DE |
| EVM0004341 | LG10 | probable disease resistance  | not DE   | not DE   | not DE | not DE |
| EVM0016479 | LG10 | probable hexokinase-like 2 p | not DE   | not DE   | not DE | not DE |
| EVM0007037 | LG10 | probable inactive receptor k | not DE   | not DE   | not DE | not DE |

|            |      |                              |          |          |          |         |
|------------|------|------------------------------|----------|----------|----------|---------|
| EVM0008352 | LG10 | probable iron/ascorbate oxid | not DE   | not DE   | not DE   | not DE  |
| EVM0020766 | LG10 | probable iron/ascorbate oxid | not DE   | not DE   | not DE   | not DE  |
| EVM0001281 | LG10 | probable mannitol dehydrogen | not DE   | not DE   | not DE   | not DE  |
| EVM0010935 | LG10 | probable mannitol dehydrogen | not DE   | not DE   | not DE   | not DE  |
| EVM0016384 | LG10 | probable mannitol dehydrogen | not DE   | not DE   | not DE   | not DE  |
| EVM0019374 | LG10 | probable prolyl 4-hydroxylas | not DE   | not DE   | not DE   | not DE  |
| EVM0000691 | LG10 | probable protein phosphatase | not DE   | not DE   | not DE   | not DE  |
| EVM0020606 | LG10 | probable serine/threonine-pr | not DE   | not DE   | not DE   | not DE  |
| EVM0007493 | LG10 | probable serine/threonine-pr | not DE   | not DE   | not DE   | not DE  |
| EVM0001775 | LG10 | probable serine/threonine-pr | not DE   | not DE   | not DE   | not DE  |
| EVM0015884 | LG10 | probable serine/threonine-pr | not DE   | not DE   | not DE   | not DE  |
| EVM0014348 | LG10 | probable sphingolipid transp | not DE   | not DE   | not DE   | not DE  |
| EVM0016131 | LG10 | probable strigolactone ester | not DE   | not DE   | not DE   | not DE  |
| EVM0017263 | LG10 | proline-rich receptor-like p | not DE   | not DE   | not DE   | not DE  |
| EVM0001364 | LG10 | proteasome subunit alpha typ | not DE   | not DE   | not DE   | not DE  |
| EVM0007050 | LG10 | protein DCL, chloroplastic   | -2.19465 | 0.000409 | not DE   | not DE  |
| EVM0015966 | LG10 | protein DYAD-like isoform X3 | not DE   | not DE   | not DE   | not DE  |
| EVM0010280 | LG10 | protein FD-like              | not DE   | not DE   | not DE   | not DE  |
| EVM0006245 | LG10 | protein LYK5-like            | not DE   | not DE   | not DE   | not DE  |
| EVM0011921 | LG10 | protein MID1-COMPLEMENTING A | not DE   | not DE   | not DE   | not DE  |
| EVM0015707 | LG10 | protein PHLOEM PROTEIN 2-LIK | 1.072518 | 0.026211 | not DE   | not DE  |
| EVM0007279 | LG10 | protein RADIALIS-like 3 isof | not DE   | not DE   | not DE   | not DE  |
| EVM0006465 | LG10 | protein RALF-like 34         | -3.84282 | 0.002418 | not DE   | not DE  |
| EVM0020916 | LG10 | protein Rf1, mitochondrial-l | not DE   | not DE   | not DE   | not DE  |
| EVM0008029 | LG10 | protein S-acyltransferase 10 | not DE   | not DE   | not DE   | not DE  |
| EVM0002967 | LG10 | protein SCAI-like            | not DE   | not DE   | not DE   | not DE  |
| EVM0004469 | LG10 | protein SGT1 homolog At5g654 | not DE   | not DE   | -1.37017 | 0.00026 |
| EVM0006915 | LG10 | protein SHORT-ROOT isoform X | not DE   | not DE   | not DE   | not DE  |
| EVM0007195 | LG10 | protein transport protein Se | not DE   | not DE   | not DE   | not DE  |
| EVM0009242 | LG10 | protein trichome birefringen | -3.04911 | 0.013632 | not DE   | not DE  |
| EVM0007337 | LG10 | proton-coupled amino acid tr | 1.862493 | 0.006757 | not DE   | not DE  |
| EVM0004855 | LG10 | putative F-box/LRR-repeat pr | not DE   | not DE   | not DE   | not DE  |
| EVM0023428 | LG10 | putative disease resistance  | not DE   | not DE   | not DE   | not DE  |
| EVM0023343 | LG10 | putative formamidase C869.04 | not DE   | not DE   | not DE   | not DE  |
| EVM0016625 | LG10 | putative pentatricopeptide r | not DE   | not DE   | not DE   | not DE  |
| EVM0015135 | LG10 | putative pentatricopeptide r | not DE   | not DE   | not DE   | not DE  |
| EVM0002476 | LG10 | putative pre-mRNA-splicing f | not DE   | not DE   | not DE   | not DE  |
| EVM0014107 | LG10 | putative pre-mRNA-splicing f | not DE   | not DE   | not DE   | not DE  |
| EVM0010082 | LG10 | putative uncharacterized pro | not DE   | not DE   | -1.57429 | 0.0013  |
| EVM0012399 | LG10 | rab proteins geranylgeranyl  | not DE   | not DE   | not DE   | not DE  |
| EVM0017970 | LG10 | red chlorophyll catabolite r | not DE   | not DE   | not DE   | not DE  |
| EVM0011705 | LG10 | ribonucleoside-diphosphate r | not DE   | not DE   | not DE   | not DE  |
| EVM0005385 | LG10 | salicylate carboxymethyltran | -1.17776 | 0.0489   | not DE   | not DE  |
| EVM0013606 | LG10 | salicylate carboxymethyltran | not DE   | not DE   | not DE   | not DE  |
| EVM0022426 | LG10 | serine/threonine-protein kin | -1.44816 | 8.55E-06 | not DE   | not DE  |
| EVM0018559 | LG10 | serine/threonine-protein kin | not DE   | not DE   | not DE   | not DE  |
| EVM0002338 | LG10 | serine/threonine-protein kin | not DE   | not DE   | not DE   | not DE  |
| EVM0024028 | LG10 | sodium channel and clathrin  | not DE   | not DE   | not DE   | not DE  |
| EVM0005103 | LG10 | splicing factor U2af large s | not DE   | not DE   | not DE   | not DE  |
| EVM0000026 | LG10 | tRNA (cytosine(34)-C(5))-met | not DE   | not DE   | not DE   | not DE  |
| EVM0006362 | LG10 | tetratricopeptide repeat pro | not DE   | not DE   | not DE   | not DE  |
| EVM0015491 | LG10 | thaumatin-like protein 1-lik | not DE   | not DE   | not DE   | not DE  |
| EVM0023977 | LG10 | thaumatin-like protein 1b    | not DE   | not DE   | not DE   | not DE  |
| EVM0000327 | LG10 | thimet oligopeptidase-like   | not DE   | not DE   | not DE   | not DE  |

|            |      |                              |          |          |          |         |
|------------|------|------------------------------|----------|----------|----------|---------|
| EVM0014564 | LG10 | thioredoxin-like protein AAE | not DE   | not DE   | not DE   | not DE  |
| EVM0003875 | LG10 | transcription factor DIVARIC | not DE   | not DE   | not DE   | not DE  |
| EVM0016530 | LG10 | transcription factor DIVARIC | not DE   | not DE   | not DE   | not DE  |
| EVM0017928 | LG10 | transcription factor DIVARIC | not DE   | not DE   | not DE   | not DE  |
| EVM0018340 | LG10 | transcription factor MYB114- | not DE   | not DE   | not DE   | not DE  |
| EVM0021720 | LG10 | transcription factor bHLH121 | not DE   | not DE   | not DE   | not DE  |
| EVM0004643 | LG10 | transcription factor bHLH25- | not DE   | not DE   | not DE   | not DE  |
| EVM0024512 | LG10 | transcription factor bHLH25- | not DE   | not DE   | not DE   | not DE  |
| EVM0013348 | LG10 | translation factor GUF1 homo | not DE   | not DE   | not DE   | not DE  |
| EVM0001945 | LG10 | transmembrane and coiled-coi | not DE   | not DE   | not DE   | not DE  |
| EVM0020528 | LG10 | transmembrane protein 53-lik | not DE   | not DE   | not DE   | not DE  |
| EVM0022343 | LG10 | type I inositol 1,4,5-trisph | not DE   | not DE   | not DE   | not DE  |
| EVM0003367 | LG10 | ubiquitin carboxyl-terminal  | not DE   | not DE   | not DE   | not DE  |
| EVM0017133 | LG10 | ubiquitin carboxyl-terminal  | not DE   | not DE   | not DE   | not DE  |
| EVM0000725 | LG10 | uncharacterized acetyltransf | not DE   | not DE   | not DE   | not DE  |
| EVM0000867 | LG10 | uncharacterized bola-like pr | not DE   | not DE   | 2.291765 | 0.00033 |
| EVM0002347 | LG10 | uncharacterized protein At1g | not DE   | not DE   | not DE   | not DE  |
| EVM0021386 | LG10 | uncharacterized protein At1g | not DE   | not DE   | not DE   | not DE  |
| EVM0021974 | LG10 | uncharacterized protein At2g | not DE   | not DE   | not DE   | not DE  |
| EVM0002701 | LG10 | uncharacterized protein At4g | not DE   | not DE   | not DE   | not DE  |
| EVM0020128 | LG10 | uncharacterized protein At4g | not DE   | not DE   | not DE   | not DE  |
| EVM0005667 | LG10 | uncharacterized protein At4g | not DE   | not DE   | not DE   | not DE  |
| EVM0007430 | LG10 | uncharacterized protein At5g | not DE   | not DE   | not DE   | not DE  |
| EVM0023353 | LG10 | uncharacterized protein At5g | not DE   | not DE   | not DE   | not DE  |
| EVM0004292 | LG10 | uncharacterized protein DDB_ | not DE   | not DE   | not DE   | not DE  |
| EVM0016820 | LG10 | uncharacterized protein LOC1 | not DE   | not DE   | not DE   | not DE  |
| EVM0021772 | LG10 | uncharacterized protein LOC1 | not DE   | not DE   | not DE   | not DE  |
| EVM0014712 | LG10 | uncharacterized protein LOC1 | not DE   | not DE   | not DE   | not DE  |
| EVM0005983 | LG10 | uncharacterized protein LOC1 | not DE   | not DE   | not DE   | not DE  |
| EVM0018793 | LG10 | uncharacterized protein LOC1 | not DE   | not DE   | not DE   | not DE  |
| EVM0010535 | LG10 | uncharacterized protein LOC1 | not DE   | not DE   | not DE   | not DE  |
| EVM0010709 | LG10 | uncharacterized protein LOC1 | not DE   | not DE   | not DE   | not DE  |
| EVM0024235 | LG10 | uncharacterized protein LOC1 | not DE   | not DE   | not DE   | not DE  |
| EVM0007898 | LG10 | uncharacterized protein LOC1 | not DE   | not DE   | not DE   | not DE  |
| EVM0008968 | LG10 | uncharacterized protein LOC1 | not DE   | not DE   | not DE   | not DE  |
| EVM0012733 | LG10 | uncharacterized protein LOC1 | not DE   | not DE   | not DE   | not DE  |
| EVM0005988 | LG10 | uncharacterized protein LOC1 | not DE   | not DE   | not DE   | not DE  |
| EVM0006881 | LG10 | uncharacterized protein LOC1 | not DE   | not DE   | not DE   | not DE  |
| EVM0013313 | LG10 | uncharacterized protein LOC1 | not DE   | not DE   | not DE   | not DE  |
| EVM0010299 | LG10 | uncharacterized protein LOC1 | not DE   | not DE   | not DE   | not DE  |
| EVM0023378 | LG10 | uncharacterized protein LOC1 | not DE   | not DE   | not DE   | not DE  |
| EVM0005544 | LG10 | uncharacterized protein LOC1 | not DE   | not DE   | not DE   | not DE  |
| EVM0000931 | LG10 | uncharacterized protein LOC1 | -1.28506 | 0.048461 | not DE   | not DE  |
| EVM0020192 | LG10 | uncharacterized protein LOC1 | not DE   | not DE   | not DE   | not DE  |
| EVM0000092 | LG10 | uncharacterized protein LOC1 | not DE   | not DE   | not DE   | not DE  |
| EVM0016594 | LG10 | uncharacterized protein LOC1 | not DE   | not DE   | not DE   | not DE  |
| EVM0011329 | LG10 | uncharacterized protein LOC1 | not DE   | not DE   | not DE   | not DE  |
| EVM0010471 | LG10 | uncharacterized protein LOC1 | not DE   | not DE   | not DE   | not DE  |
| EVM0001147 | LG10 | uncharacterized protein LOC1 | not DE   | not DE   | not DE   | not DE  |
| EVM0012616 | LG10 | uncharacterized protein LOC1 | not DE   | not DE   | not DE   | not DE  |
| EVM0017028 | LG10 | uncharacterized protein LOC1 | not DE   | not DE   | not DE   | not DE  |
| EVM0018446 | LG10 | uncharacterized protein LOC1 | not DE   | not DE   | not DE   | not DE  |
| EVM0006158 | LG10 | uncharacterized protein LOC1 | not DE   | not DE   | not DE   | not DE  |
| EVM0011602 | LG10 | uncharacterized protein LOC1 | not DE   | not DE   | not DE   | not DE  |

|            |      |                              |          |          |          |         |
|------------|------|------------------------------|----------|----------|----------|---------|
| EVM0001926 | LG10 | uncharacterized protein LOC1 | not DE   | not DE   | not DE   | not DE  |
| EVM0012005 | LG10 | uncharacterized protein LOC1 | not DE   | not DE   | not DE   | not DE  |
| EVM0000364 | LG10 | uncharacterized protein LOC1 | not DE   | not DE   | not DE   | not DE  |
| EVM0023161 | LG10 | uncharacterized protein LOC1 | not DE   | not DE   | not DE   | not DE  |
| EVM0022600 | LG10 | uncharacterized protein LOC1 | not DE   | not DE   | not DE   | not DE  |
| EVM0020945 | LG10 | uncharacterized protein LOC1 | not DE   | not DE   | -1.22201 | #####   |
| EVM0003441 | LG10 | uncharacterized protein LOC1 | 2.961922 | 8.30E-09 | not DE   | not DE  |
| EVM0008154 | LG10 | uncharacterized protein LOC1 | not DE   | not DE   | not DE   | not DE  |
| EVM0006678 | LG10 | uncharacterized protein LOC1 | not DE   | not DE   | not DE   | not DE  |
| EVM0015257 | LG10 | uncharacterized protein LOC1 | 1.078012 | 0.006421 | not DE   | not DE  |
| EVM0010109 | LG10 | uncharacterized protein LOC1 | not DE   | not DE   | not DE   | not DE  |
| EVM0021084 | LG10 | uncharacterized protein LOC1 | not DE   | not DE   | not DE   | not DE  |
| EVM0021606 | LG10 | uncharacterized protein LOC1 | not DE   | not DE   | not DE   | not DE  |
| EVM0009793 | LG10 | uncharacterized protein LOC1 | not DE   | not DE   | not DE   | not DE  |
| EVM0007278 | LG10 | uncharacterized protein LOC1 | not DE   | not DE   | not DE   | not DE  |
| EVM0016897 | LG10 | uncharacterized protein LOC1 | not DE   | not DE   | not DE   | not DE  |
| EVM0008113 | LG10 | uncharacterized protein LOC1 | not DE   | not DE   | not DE   | not DE  |
| EVM0003076 | LG10 | uncharacterized protein LOC1 | not DE   | not DE   | not DE   | not DE  |
| EVM0006455 | LG10 | uncharacterized protein LOC1 | not DE   | not DE   | not DE   | not DE  |
| EVM0004788 | LG10 | uncharacterized protein LOC1 | not DE   | not DE   | not DE   | not DE  |
| EVM0012749 | LG10 | uncharacterized protein LOC1 | not DE   | not DE   | not DE   | not DE  |
| EVM0013865 | LG10 | uncharacterized protein LOC1 | not DE   | not DE   | not DE   | not DE  |
| EVM0023377 | LG10 | uncharacterized protein LOC1 | not DE   | not DE   | not DE   | not DE  |
| EVM0013757 | LG10 | uncharacterized protein LOC1 | not DE   | not DE   | not DE   | not DE  |
| EVM0009814 | LG10 | uncharacterized protein LOC1 | not DE   | not DE   | not DE   | not DE  |
| EVM0010889 | LG10 | uncharacterized protein LOC1 | not DE   | not DE   | not DE   | not DE  |
| EVM0000535 | LG10 | uncharacterized protein LOC1 | not DE   | not DE   | not DE   | not DE  |
| EVM0002537 | LG10 | uncharacterized protein LOC1 | not DE   | not DE   | not DE   | not DE  |
| EVM0022051 | LG10 | uncharacterized protein LOC1 | not DE   | not DE   | not DE   | not DE  |
| EVM0008584 | LG10 | uncharacterized protein LOC1 | not DE   | not DE   | not DE   | not DE  |
| EVM0008765 | LG10 | uncharacterized protein LOC1 | not DE   | not DE   | not DE   | not DE  |
| EVM0018606 | LG10 | uncharacterized protein LOC1 | not DE   | not DE   | not DE   | not DE  |
| EVM0015496 | LG10 | uncharacterized protein LOC1 | not DE   | not DE   | not DE   | not DE  |
| EVM0024146 | LG10 | uncharacterized protein LOC1 | not DE   | not DE   | not DE   | not DE  |
| EVM0018205 | LG10 | uncharacterized protein LOC1 | not DE   | not DE   | not DE   | not DE  |
| EVM0001495 | LG10 | uncharacterized protein LOC1 | 1.404468 | 0.001258 | 1.157779 | 0.0136  |
| EVM0016920 | LG10 | uncharacterized protein LOC1 | not DE   | not DE   | not DE   | not DE  |
| EVM0005214 | LG10 | uncharacterized protein LOC1 | not DE   | not DE   | not DE   | not DE  |
| EVM0021352 | LG10 | uncharacterized protein LOC1 | not DE   | not DE   | 1.460375 | 0.00447 |
| EVM0000398 | LG10 | uncharacterized protein LOC1 | not DE   | not DE   | not DE   | not DE  |
| EVM0023987 | LG10 | uncharacterized protein LOC1 | not DE   | not DE   | not DE   | not DE  |
| EVM0009122 | LG10 | uncharacterized protein LOC1 | not DE   | not DE   | not DE   | not DE  |
| EVM0005570 | LG10 | uncharacterized protein LOC1 | not DE   | not DE   | not DE   | not DE  |
| EVM0015953 | LG10 | uncharacterized protein ycf3 | not DE   | not DE   | not DE   | not DE  |
| EVM0012120 | LG10 | uncharacterized serine-rich  | not DE   | not DE   | not DE   | not DE  |
| EVM0014925 | LG10 | uncharacterized transporter  | not DE   | not DE   | not DE   | not DE  |
| EVM0002968 | LG10 | very-long-chain (3R)-3-hydro | not DE   | not DE   | not DE   | not DE  |
| EVM0014368 | LG10 | vesicle transport protein GC | not DE   | not DE   | not DE   | not DE  |
| EVM0011768 | LG10 | zeaxanthin epoxidase, chloro | not DE   | not DE   | not DE   | not DE  |
| EVM0018147 | LG10 | zeaxanthin epoxidase, chloro | not DE   | not DE   | not DE   | not DE  |
| EVM0018817 | LG10 | zeaxanthin epoxidase, chloro | not DE   | not DE   | not DE   | not DE  |
| EVM0022682 | LG10 | zeaxanthin epoxidase, chloro | not DE   | not DE   | not DE   | not DE  |
| EVM0021048 | LG10 | zinc finger CCCH domain-cont | not DE   | not DE   | not DE   | not DE  |
| EVM0013498 | LG10 | zinc finger CCCH domain-cont | not DE   | not DE   | not DE   | not DE  |

|            |      |                                |          |          |        |        |
|------------|------|--------------------------------|----------|----------|--------|--------|
| EVM0007827 | LG10 | zinc finger CCCH domain-cont   | not DE   | not DE   | not DE | not DE |
| EVM0008137 | LG10 | zinc finger CCCH domain-cont   | not DE   | not DE   | not DE | not DE |
| EVM0006187 | LG10 | zinc finger protein 1-like     | not DE   | not DE   | not DE | not DE |
| EVM0008511 | LG10 | 3'-N-debenzoyl-2'-deoxy-       | not DE   | not DE   | not DE | not DE |
| EVM0021122 | LG10 | 3-hydroxy-3-methylglutaryl-co  | 1.503872 | 0.03176  | not DE | not DE |
| EVM0013941 | LG10 | 50S ribosomal protein L33, pa  | not DE   | not DE   | not DE | not DE |
| EVM0009702 | LG10 | ADP-ribosylation factor famil  | -1.06525 | 0.01649  | not DE | not DE |
| EVM0014815 | LG10 | AMP-dependent synthetase and   | 1.386884 | 0.012714 | not DE | not DE |
| EVM0022057 | LG10 | ATP binding protein, putative  | not DE   | not DE   | not DE | not DE |
| EVM0000043 | LG10 | ATP-dependent DNA helicase DD  | not DE   | not DE   | not DE | not DE |
| EVM0004731 | LG10 | Aldehyde dehydrogenase         | -2.34978 | 7.83E-06 | not DE | not DE |
| EVM0021119 | LG10 | Alpha/beta-Hydrolases superfam | not DE   | not DE   | not DE | not DE |
| EVM0003676 | LG10 | Ankyrin repeat family protein  | not DE   | not DE   | not DE | not DE |
| EVM0021368 | LG10 | Ankyrin repeat family protein  | not DE   | not DE   | not DE | not DE |
| EVM0008675 | LG10 | Ankyrin repeat protein         | not DE   | not DE   | not DE | not DE |
| EVM0023114 | LG10 | Aspartic proteinase nepenthes  | not DE   | not DE   | not DE | not DE |
| EVM0000808 | LG10 | BZIP transcription factor fam  | not DE   | not DE   | not DE | not DE |
| EVM0020742 | LG10 | Basic helix-loop-helix DNA-bi  | not DE   | not DE   | not DE | not DE |
| EVM0004173 | LG10 | Basic helix-loop-helix DNA-bi  | not DE   | not DE   | not DE | not DE |
| EVM0007348 | LG10 | Basic helix-loop-helix DNA-bi  | not DE   | not DE   | not DE | not DE |
| EVM0011965 | LG10 | Basic helix-loop-helix DNA-bi  | not DE   | not DE   | not DE | not DE |
| EVM0012804 | LG10 | Basic helix-loop-helix DNA-bi  | not DE   | not DE   | not DE | not DE |
| EVM0001948 | LG10 | Basic helix-loop-helix DNA-bi  | not DE   | not DE   | not DE | not DE |
| EVM0012323 | LG10 | Basic helix-loop-helix DNA-bi  | not DE   | not DE   | not DE | not DE |
| EVM0005028 | LG10 | Basic leucine-zipper 5, putat  | 2.611769 | 0.012428 | not DE | not DE |
| EVM0021212 | LG10 | Beta-galactosidase 3           | not DE   | not DE   | not DE | not DE |
| EVM0017689 | LG10 | BnaC09g40680D                  | not DE   | not DE   | not DE | not DE |
| EVM0013629 | LG10 | CBS domain-containing protein  | not DE   | not DE   | not DE | not DE |
| EVM0005234 | LG10 | Calcium-binding EF-hand famil  | not DE   | not DE   | not DE | not DE |
| EVM0010253 | LG10 | Calcium-binding EF-hand famil  | 7.868922 | 0.035195 | not DE | not DE |
| EVM0009553 | LG10 | Calcium-dependent protein kin  | not DE   | not DE   | not DE | not DE |
| EVM0020291 | LG10 | Carbamoyl-phosphate synthase   | not DE   | not DE   | not DE | not DE |
| EVM0011498 | LG10 | Cell wall / vacuolar inhibitor | not DE   | not DE   | not DE | not DE |
| EVM0004041 | LG10 | Centrin2 isoform 1             | not DE   | not DE   | not DE | not DE |
| EVM0011953 | LG10 | Concanavalin A-like lectin pr  | not DE   | not DE   | not DE | not DE |
| EVM0015419 | LG10 | Cytochrome P450 71A1           | not DE   | not DE   | not DE | not DE |
| EVM0018362 | LG10 | Cytochrome P450 superfamily p  | not DE   | not DE   | not DE | not DE |
| EVM0016308 | LG10 | Cytochrome P450, family 722,   | not DE   | not DE   | not DE | not DE |
| EVM0017715 | LG10 | Cytochrome P450, family 78, s  | not DE   | not DE   | not DE | not DE |
| EVM0003675 | LG10 | Cytochrome P450, putative      | not DE   | not DE   | not DE | not DE |
| EVM0021007 | LG10 | Cytochrome P450, putative      | not DE   | not DE   | not DE | not DE |
| EVM0023148 | LG10 | Cytochrome c oxidase subunit   | not DE   | not DE   | not DE | not DE |
| EVM0014162 | LG10 | DISPROPORTIONATING ENZYME fam  | not DE   | not DE   | not DE | not DE |
| EVM0000704 | LG10 | DNA binding protein, putative  | not DE   | not DE   | not DE | not DE |
| EVM0007286 | LG10 | DNA/RNA polymerases superfami  | not DE   | not DE   | not DE | not DE |
| EVM0019000 | LG10 | DNA/RNA polymerases superfami  | not DE   | not DE   | not DE | not DE |
| EVM0012587 | LG10 | Dof-type zinc finger DNA-bind  | not DE   | not DE   | not DE | not DE |
| EVM0014616 | LG10 | Dolichyl-diphosphooligosaccha  | not DE   | not DE   | not DE | not DE |
| EVM0023365 | LG10 | Domain of Uncharacterized pro  | not DE   | not DE   | not DE | not DE |
| EVM0004230 | LG10 | EF hand calcium-binding prote  | not DE   | not DE   | not DE | not DE |
| EVM0017242 | LG10 | EF hand calcium-binding prote  | not DE   | not DE   | not DE | not DE |
| EVM0009948 | LG10 | Encodes a root meristem growt  | not DE   | not DE   | not DE | not DE |
| EVM0023011 | LG10 | Encodes a root meristem growt  | not DE   | not DE   | not DE | not DE |
| EVM0024258 | LG10 | Ethylene-responsive transcrip  | not DE   | not DE   | not DE | not DE |



|            |      |                                |          |          |        |         |
|------------|------|--------------------------------|----------|----------|--------|---------|
| EVM0017025 | LG10 | Eukaryotic aspartyl protease   | not DE   | not DE   | not DE | not DE  |
| EVM0011171 | LG10 | FAD/NAD(P)-binding oxidoreduc  | not DE   | not DE   | not DE | not DE  |
| EVM0020108 | LG10 | FRIGIDA3a-2                    | not DE   | not DE   | not DE | not DE  |
| EVM0001002 | LG10 | Farnesylated protein 6         | not DE   | not DE   | not DE | not DE  |
| EVM0018026 | LG10 | Folic acid and derivative bic  | not DE   | not DE   | not DE | not DE  |
| EVM0024428 | LG10 | Folic acid and derivative bic  | not DE   | not DE   | not DE | not DE  |
| EVM0020573 | LG10 | GDP-mannose transporter, puta  | not DE   | not DE   | not DE | not DE  |
| EVM0022838 | LG10 | GH3                            | 6.427388 | 0.000472 | not DE | not DE  |
| EVM0015501 | LG10 | GTP-binding protein yptv3, pu  | not DE   | not DE   | not DE | not DE  |
| EVM0000509 | LG10 | Glucan endo-1,3-beta-glucosid  | not DE   | not DE   | not DE | not DE  |
| EVM0007018 | LG10 | Glycogen synthase              | not DE   | not DE   | not DE | not DE  |
| EVM0014482 | LG10 | Glycogen synthase              | not DE   | not DE   | not DE | not DE  |
| EVM0004630 | LG10 | Glycosyl hydrolase superfamil  | not DE   | not DE   | not DE | not DE  |
| EVM0017660 | LG10 | Got1/Sft2-like vescicle trans  | not DE   | not DE   | not DE | not DE  |
| EVM0015843 | LG10 | GroES-like zinc-binding alcoh  | not DE   | not DE   | not DE | not DE  |
| EVM0001405 | LG10 | HXXXD-type acyl-transferase f  | not DE   | not DE   | not DE | not DE  |
| EVM0014520 | LG10 | HXXXD-type acyl-transferase f  | not DE   | not DE   | not DE | not DE  |
| EVM0006931 | LG10 | Heat shock factor 4            | not DE   | not DE   | not DE | not DE  |
| EVM0020527 | LG10 | Histidine kinase 1             | not DE   | not DE   | not DE | not DE  |
| EVM0003058 | LG10 | Homeobox protein 21, putative  | not DE   | not DE   | not DE | not DE  |
| EVM0008743 | LG10 | Homeodomain-leucine zipper pr  | not DE   | not DE   | not DE | not DE  |
| EVM0015081 | LG10 | Homeodomain-leucine zipper pr  | not DE   | not DE   | not DE | not DE  |
| EVM0000951 | LG10 | Isoflavone reductase, putativ  | not DE   | not DE   | not DE | not DE  |
| EVM0020556 | LG10 | JHL03K20.4                     | not DE   | not DE   | not DE | not DE  |
| EVM0007843 | LG10 | L-myo-inositol-1-phosphate sy  | not DE   | not DE   | 1.0951 | 0.04681 |
| EVM0008405 | LG10 | LOB domain-containing 36 -lik  | not DE   | not DE   | not DE | not DE  |
| EVM0024332 | LG10 | LOB domain-containing 36 -lik  | not DE   | not DE   | not DE | not DE  |
| EVM0009847 | LG10 | Laccase 11                     | not DE   | not DE   | not DE | not DE  |
| EVM0007940 | LG10 | Lateral root primordium prote  | not DE   | not DE   | not DE | not DE  |
| EVM0001633 | LG10 | Lipase/lipooxygenase, PLAT/LH  | not DE   | not DE   | not DE | not DE  |
| EVM0008074 | LG10 | Lysosomal alpha-mannosidase    | not DE   | not DE   | not DE | not DE  |
| EVM0022466 | LG10 | Major facilitator superfamily  | not DE   | not DE   | not DE | not DE  |
| EVM0023555 | LG10 | Membrane lipoprotein           | not DE   | not DE   | not DE | not DE  |
| EVM0003671 | LG10 | Mitochondrial transcription t  | 2.064132 | 0.000257 | not DE | not DE  |
| EVM0000200 | LG10 | Multidrug resistance pump, pu  | not DE   | not DE   | not DE | not DE  |
| EVM0009892 | LG10 | Multidrug resistance pump, pu  | not DE   | not DE   | not DE | not DE  |
| EVM0000810 | LG10 | Myb domain protein 84, putati  | not DE   | not DE   | not DE | not DE  |
| EVM0015760 | LG10 | Myosin-H heavy chain isoform   | not DE   | not DE   | not DE | not DE  |
| EVM0020101 | LG10 | NAD(P)-binding Rossmann-fold   | not DE   | not DE   | not DE | not DE  |
| EVM0014749 | LG10 | NADPH-dependent thioredoxin r  | not DE   | not DE   | not DE | not DE  |
| EVM0019830 | LG10 | Nucleic acid binding protein,  | not DE   | not DE   | not DE | not DE  |
| EVM0007448 | LG10 | P-loop containing nucleoside   | 2.633002 | 0.014041 | not DE | not DE  |
| EVM0002495 | LG10 | P-loop containing nucleoside   | not DE   | not DE   | not DE | not DE  |
| EVM0010298 | LG10 | P-loop containing nucleoside   | not DE   | not DE   | not DE | not DE  |
| EVM0013473 | LG10 | PYR1-like 11                   | not DE   | not DE   | not DE | not DE  |
| EVM0018715 | LG10 | Pectin lyase-like superfamily  | not DE   | not DE   | not DE | not DE  |
| EVM0013165 | LG10 | Pentatricopeptide repeat-cont  | not DE   | not DE   | not DE | not DE  |
| EVM0015772 | LG10 | Pentatricopeptide repeat-cont  | not DE   | not DE   | not DE | not DE  |
| EVM0012588 | LG10 | Peptidylprolyl cis/trans isom  | not DE   | not DE   | not DE | not DE  |
| EVM0005549 | LG10 | Peroxidase 47 -like protein    | not DE   | not DE   | not DE | not DE  |
| EVM0016240 | LG10 | Peroxidase 72 precursor, puta  | not DE   | not DE   | not DE | not DE  |
| EVM0013436 | LG10 | Peroxidase superfamily protei  | not DE   | not DE   | not DE | not DE  |
| EVM0006143 | LG10 | Phospholipase A 2A, IIA, PLA2A | not DE   | not DE   | not DE | not DE  |
| EVM0011589 | LG10 | Phospholipase A 2A, IIA, PLA2A | not DE   | not DE   | not DE | not DE  |

|            |      |                               |          |          |          |         |
|------------|------|-------------------------------|----------|----------|----------|---------|
| EVM0009190 | LG10 | Plant glycogenin-like starch  | not DE   | not DE   | not DE   | not DE  |
| EVM0005849 | LG10 | Polyneuridine-aldehyde estera | not DE   | not DE   | not DE   | not DE  |
| EVM0006546 | LG10 | Polyneuridine-aldehyde estera | not DE   | not DE   | not DE   | not DE  |
| EVM0000818 | LG10 | Proteasome activator complex  | not DE   | not DE   | not DE   | not DE  |
| EVM0012889 | LG10 | Protein MLO, putative         | not DE   | not DE   | not DE   | not DE  |
| EVM0011948 | LG10 | Protein preY, mitochondrial   | not DE   | not DE   | 1.38302  | 0.01634 |
| EVM0015852 | LG10 | RING finger protein 5         | -2.38521 | 1.74E-05 | -1.05369 | 0.00627 |
| EVM0019218 | LG10 | RING-H2 zinc finger protein R | not DE   | not DE   | not DE   | not DE  |
| EVM0005143 | LG10 | RING/FYVE/PHD zinc finger sup | not DE   | not DE   | not DE   | not DE  |
| EVM0015548 | LG10 | RING/U-box superfamily protei | not DE   | not DE   | not DE   | not DE  |
| EVM0006252 | LG10 | RNA-binding 39                | not DE   | not DE   | not DE   | not DE  |
| EVM0003181 | LG10 | RNA-binding family protein is | not DE   | not DE   | not DE   | not DE  |
| EVM0012824 | LG10 | Ras-related protein RABH1e    | not DE   | not DE   | not DE   | not DE  |
| EVM0016680 | LG10 | RecName: Full=Flavonol syntha | not DE   | not DE   | not DE   | not DE  |
| EVM0010066 | LG10 | Rer1 family protein isoform 2 | not DE   | not DE   | not DE   | not DE  |
| EVM0002146 | LG10 | Ribosomal L29 family protein  | not DE   | not DE   | not DE   | not DE  |
| EVM0020840 | LG10 | Ribosomal protein L18e/L15 su | not DE   | not DE   | not DE   | not DE  |
| EVM0007043 | LG10 | Ribosomal protein L6 family p | not DE   | not DE   | not DE   | not DE  |
| EVM0003016 | LG10 | S-adenosyl-L-methionine-depen | not DE   | not DE   | not DE   | not DE  |
| EVM0011014 | LG10 | S-adenosyl-L-methionine-depen | not DE   | not DE   | not DE   | not DE  |
| EVM0021299 | LG10 | SAUR family protein, partial  | not DE   | not DE   | not DE   | not DE  |
| EVM0008742 | LG10 | SCL domain class transcriptid | 1.518771 | 0.038288 | not DE   | not DE  |
| EVM0018422 | LG10 | Salicylate O-methyltransferas | not DE   | not DE   | not DE   | not DE  |
| EVM0007289 | LG10 | Salicylic acid-binding protei | not DE   | not DE   | not DE   | not DE  |
| EVM0024658 | LG10 | Salicylic acid-binding protei | not DE   | not DE   | not DE   | not DE  |
| EVM0008509 | LG10 | Scaffold attachment factor Bl | not DE   | not DE   | not DE   | not DE  |
| EVM0012219 | LG10 | Selection and upkeep of intra | not DE   | not DE   | not DE   | not DE  |
| EVM0020054 | LG10 | Serine carboxypeptidase S28 f | not DE   | not DE   | not DE   | not DE  |
| EVM0000769 | LG10 | Serine carboxypeptidase-like  | not DE   | not DE   | not DE   | not DE  |
| EVM0011146 | LG10 | Serine/threonine phosphatase  | not DE   | not DE   | not DE   | not DE  |
| EVM0004723 | LG10 | Serine/threonine-protein kina | not DE   | not DE   | not DE   | not DE  |
| EVM0013551 | LG10 | Serine/threonine-protein kina | not DE   | not DE   | not DE   | not DE  |
| EVM0000496 | LG10 | Soluble inorganic pyrophospha | not DE   | not DE   | 1.38517  | #####   |
| EVM0013622 | LG10 | Spindle assembly abnormal pro | not DE   | not DE   | not DE   | not DE  |
| EVM0009353 | LG10 | Thioesterase superfamily prot | not DE   | not DE   | not DE   | not DE  |
| EVM0000526 | LG10 | Transcription elongation fact | not DE   | not DE   | not DE   | not DE  |
| EVM0016691 | LG10 | Transcription factor-like pro | not DE   | not DE   | not DE   | not DE  |
| EVM0014775 | LG10 | Transcription initiation fact | not DE   | not DE   | not DE   | not DE  |
| EVM0005424 | LG10 | Transmembrane isoform 1       | not DE   | not DE   | not DE   | not DE  |
| EVM0016548 | LG10 | Transmembrane isoform 1       | not DE   | not DE   | not DE   | not DE  |
| EVM0020042 | LG10 | Transposon Ty3-I Gag-Pol poly | not DE   | not DE   | not DE   | not DE  |
| EVM0013251 | LG10 | Trichome birefringence-like 1 | -3.43127 | 0.001628 | not DE   | not DE  |
| EVM0020140 | LG10 | Trichome birefringence-like 7 | not DE   | not DE   | not DE   | not DE  |
| EVM0012015 | LG10 | Trimeric LpxA-like enzymes su | not DE   | not DE   | not DE   | not DE  |
| EVM0006409 | LG10 | Tubulin alpha-2 chain         | not DE   | not DE   | not DE   | not DE  |
| EVM0014168 | LG10 | U-box domain-containing prote | not DE   | not DE   | not DE   | not DE  |
| EVM0023726 | LG10 | UDP-glucosyltransferase, puta | not DE   | not DE   | not DE   | not DE  |
| EVM0011247 | LG10 | Uncharacterized amino-acid pe | not DE   | not DE   | not DE   | not DE  |
| EVM0023092 | LG10 | Uncharacterized protein TCM_C | not DE   | not DE   | not DE   | not DE  |
| EVM0011683 | LG10 | Uncharacterized protein TCM_C | not DE   | not DE   | not DE   | not DE  |
| EVM0002136 | LG10 | Uncharacterized protein TCM_C | not DE   | not DE   | not DE   | not DE  |
| EVM0020831 | LG10 | Uncharacterized protein TCM_C | not DE   | not DE   | not DE   | not DE  |
| EVM0019288 | LG10 | Uncharacterized protein TCM_C | not DE   | not DE   | not DE   | not DE  |
| EVM0019943 | LG10 | Uncharacterized protein TCM_C | -1.42127 | 0.024756 | not DE   | not DE  |

|            |      |                               |          |          |        |        |
|------------|------|-------------------------------|----------|----------|--------|--------|
| EVM0019324 | LG10 | Uncharacterized protein TCM_C | not DE   | not DE   | not DE | not DE |
| EVM0011142 | LG10 | Uncharacterized protein TCM_C | not DE   | not DE   | not DE | not DE |
| EVM0004188 | LG10 | Uncharacterized protein TCM_C | not DE   | not DE   | not DE | not DE |
| EVM0007221 | LG10 | Uncharacterized protein TCM_C | not DE   | not DE   | not DE | not DE |
| EVM0024250 | LG10 | Uncharacterized protein TCM_C | not DE   | not DE   | not DE | not DE |
| EVM0018745 | LG10 | Uncharacterized protein TCM_C | not DE   | not DE   | not DE | not DE |
| EVM0017079 | LG10 | Uncharacterized protein TCM_C | not DE   | not DE   | not DE | not DE |
| EVM0019865 | LG10 | Uncharacterized protein TCM_C | not DE   | not DE   | not DE | not DE |
| EVM0006180 | LG10 | Uncharacterized protein TCM_C | not DE   | not DE   | not DE | not DE |
| EVM0006371 | LG10 | Uncharacterized protein isofo | not DE   | not DE   | not DE | not DE |
| EVM0014022 | LG10 | Uncharacterized protein isofo | not DE   | not DE   | not DE | not DE |
| EVM0015191 | LG10 | Uncharacterized protein isofo | not DE   | not DE   | not DE | not DE |
| EVM0018571 | LG10 | Uncharacterized protein isofo | not DE   | not DE   | not DE | not DE |
| EVM0019513 | LG10 | Uncharacterized protein isofo | -1.7653  | 6.75E-06 | not DE | not DE |
| EVM0022165 | LG10 | Uncharacterized protein isofo | not DE   | not DE   | not DE | not DE |
| EVM0017004 | LG10 | Violaxanthin de-epoxidase-rel | 1.551304 | 0.006232 | not DE | not DE |
| EVM0001875 | LG10 | WRKY DNA-binding protein 7 is | not DE   | not DE   | not DE | not DE |
| EVM0009349 | LG10 | WRKY DNA-binding protein 7 is | not DE   | not DE   | not DE | not DE |
| EVM0023898 | LG10 | WUSCHEL protein               | not DE   | not DE   | not DE | not DE |
| EVM0013801 | LG10 | White-brown complex protein 1 | not DE   | not DE   | not DE | not DE |
| EVM0012415 | LG10 | YEATS family protein isoform  | not DE   | not DE   | not DE | not DE |
| EVM0009449 | LG10 | Zinc finger protein 7, putati | not DE   | not DE   | not DE | not DE |
| EVM0015983 | LG10 | abscisic acid-responsive HVA2 | -1.208   | 0.000161 | not DE | not DE |
| EVM0004930 | LG10 | actin family protein          | not DE   | not DE   | not DE | not DE |
| EVM0010819 | LG10 | alcohol dehydrogenase         | not DE   | not DE   | not DE | not DE |
| EVM0000125 | LG10 | conserved hypothetical protei | not DE   | not DE   | not DE | not DE |
| EVM0001722 | LG10 | conserved hypothetical protei | not DE   | not DE   | not DE | not DE |
| EVM0005545 | LG10 | conserved hypothetical protei | not DE   | not DE   | not DE | not DE |
| EVM0010234 | LG10 | conserved hypothetical protei | not DE   | not DE   | not DE | not DE |
| EVM0020225 | LG10 | conserved hypothetical protei | not DE   | not DE   | not DE | not DE |
| EVM0022735 | LG10 | conserved hypothetical protei | not DE   | not DE   | not DE | not DE |
| EVM0009308 | LG10 | cytochrome P450, putative     | not DE   | not DE   | not DE | not DE |
| EVM0002116 | LG10 | dehydrin                      | not DE   | not DE   | not DE | not DE |
| EVM0023600 | LG10 | diacylglycerol acyltransferas | not DE   | not DE   | not DE | not DE |
| EVM0006383 | LG10 | flavanone-3-hydroxylase       | not DE   | not DE   | not DE | not DE |
| EVM0005218 | LG10 | fruit weight 2.2-2 protein    | not DE   | not DE   | not DE | not DE |
| EVM0005448 | LG10 | fruit weight 2.2-2 protein    | not DE   | not DE   | not DE | not DE |
| EVM0018021 | LG10 | geranylgeranyl pyrophosphate  | not DE   | not DE   | not DE | not DE |
| EVM0012477 | LG10 | hypothetical protein          | 3.05878  | 0.00066  | not DE | not DE |
| EVM0002374 | LG10 | hypothetical protein AMTR_s05 | not DE   | not DE   | not DE | not DE |
| EVM0019420 | LG10 | hypothetical protein CARUB_vl | not DE   | not DE   | not DE | not DE |
| EVM0009509 | LG10 | hypothetical protein CARUB_vl | not DE   | not DE   | not DE | not DE |
| EVM0016023 | LG10 | hypothetical protein CARUB_vl | not DE   | not DE   | not DE | not DE |
| EVM0017111 | LG10 | hypothetical protein CICLE_vl | not DE   | not DE   | not DE | not DE |
| EVM0011123 | LG10 | hypothetical protein CICLE_vl | not DE   | not DE   | not DE | not DE |
| EVM0024274 | LG10 | hypothetical protein CICLE_vl | not DE   | not DE   | not DE | not DE |
| EVM0004798 | LG10 | hypothetical protein CICLE_vl | not DE   | not DE   | not DE | not DE |
| EVM0013378 | LG10 | hypothetical protein CICLE_vl | not DE   | not DE   | not DE | not DE |
| EVM0016334 | LG10 | hypothetical protein CICLE_vl | not DE   | not DE   | not DE | not DE |
| EVM0009335 | LG10 | hypothetical protein CICLE_vl | not DE   | not DE   | not DE | not DE |
| EVM0018784 | LG10 | hypothetical protein CICLE_vl | not DE   | not DE   | not DE | not DE |
| EVM0012921 | LG10 | hypothetical protein CICLE_vl | not DE   | not DE   | not DE | not DE |
| EVM0005032 | LG10 | hypothetical protein CICLE_vl | not DE   | not DE   | not DE | not DE |
| EVM0018456 | LG10 | hypothetical protein CICLE_vl | not DE   | not DE   | not DE | not DE |

|            |      |                               |          |          |          |         |
|------------|------|-------------------------------|----------|----------|----------|---------|
| EVM0013715 | LG10 | hypothetical protein CICLE_v1 | not DE   | not DE   | not DE   | not DE  |
| EVM0008918 | LG10 | hypothetical protein CICLE_v1 | not DE   | not DE   | not DE   | not DE  |
| EVM0015361 | LG10 | hypothetical protein CICLE_v1 | not DE   | not DE   | not DE   | not DE  |
| EVM0003362 | LG10 | hypothetical protein CICLE_v1 | not DE   | not DE   | not DE   | not DE  |
| EVM0007915 | LG10 | hypothetical protein CICLE_v1 | 1.018536 | 0.000563 | not DE   | not DE  |
| EVM0001442 | LG10 | hypothetical protein CICLE_v1 | not DE   | not DE   | not DE   | not DE  |
| EVM0010705 | LG10 | hypothetical protein CICLE_v1 | not DE   | not DE   | not DE   | not DE  |
| EVM0003089 | LG10 | hypothetical protein CICLE_v1 | not DE   | not DE   | not DE   | not DE  |
| EVM0008761 | LG10 | hypothetical protein CICLE_v1 | not DE   | not DE   | not DE   | not DE  |
| EVM0020074 | LG10 | hypothetical protein CICLE_v1 | not DE   | not DE   | not DE   | not DE  |
| EVM0020587 | LG10 | hypothetical protein CICLE_v1 | not DE   | not DE   | not DE   | not DE  |
| EVM0002426 | LG10 | hypothetical protein CICLE_v1 | not DE   | not DE   | not DE   | not DE  |
| EVM0011844 | LG10 | hypothetical protein CICLE_v1 | not DE   | not DE   | not DE   | not DE  |
| EVM0004317 | LG10 | hypothetical protein CICLE_v1 | not DE   | not DE   | not DE   | not DE  |
| EVM0020538 | LG10 | hypothetical protein CICLE_v1 | not DE   | not DE   | not DE   | not DE  |
| EVM0009688 | LG10 | hypothetical protein CICLE_v1 | 1.572657 | 0.002543 | not DE   | not DE  |
| EVM0022610 | LG10 | hypothetical protein CICLE_v1 | not DE   | not DE   | not DE   | not DE  |
| EVM0020633 | LG10 | hypothetical protein CICLE_v1 | not DE   | not DE   | not DE   | not DE  |
| EVM0008880 | LG10 | hypothetical protein CICLE_v1 | not DE   | not DE   | 1.103433 | 0.03228 |
| EVM0006137 | LG10 | hypothetical protein CICLE_v1 | not DE   | not DE   | not DE   | not DE  |
| EVM0020211 | LG10 | hypothetical protein CICLE_v1 | not DE   | not DE   | not DE   | not DE  |
| EVM0002710 | LG10 | hypothetical protein CICLE_v1 | not DE   | not DE   | not DE   | not DE  |
| EVM0014400 | LG10 | hypothetical protein CICLE_v1 | 6.646144 | 1.90E-05 | not DE   | not DE  |
| EVM0012492 | LG10 | hypothetical protein CICLE_v1 | not DE   | not DE   | not DE   | not DE  |
| EVM0000485 | LG10 | hypothetical protein CICLE_v1 | not DE   | not DE   | not DE   | not DE  |
| EVM0023046 | LG10 | hypothetical protein CICLE_v1 | not DE   | not DE   | not DE   | not DE  |
| EVM0013521 | LG10 | hypothetical protein CICLE_v1 | -2.24509 | 2.70E-05 | not DE   | not DE  |
| EVM0004866 | LG10 | hypothetical protein CICLE_v1 | not DE   | not DE   | not DE   | not DE  |
| EVM0013156 | LG10 | hypothetical protein CICLE_v1 | not DE   | not DE   | not DE   | not DE  |
| EVM0011987 | LG10 | hypothetical protein CICLE_v1 | not DE   | not DE   | not DE   | not DE  |
| EVM0015140 | LG10 | hypothetical protein CICLE_v1 | -3.51271 | 0.000423 | not DE   | not DE  |
| EVM0005298 | LG10 | hypothetical protein CICLE_v1 | not DE   | not DE   | not DE   | not DE  |
| EVM0014640 | LG10 | hypothetical protein CICLE_v1 | not DE   | not DE   | not DE   | not DE  |
| EVM0014938 | LG10 | hypothetical protein CICLE_v1 | not DE   | not DE   | not DE   | not DE  |
| EVM0022746 | LG10 | hypothetical protein CICLE_v1 | not DE   | not DE   | not DE   | not DE  |
| EVM0014549 | LG10 | hypothetical protein CICLE_v1 | not DE   | not DE   | not DE   | not DE  |
| EVM0021963 | LG10 | hypothetical protein CICLE_v1 | not DE   | not DE   | not DE   | not DE  |
| EVM0017553 | LG10 | hypothetical protein CICLE_v1 | not DE   | not DE   | not DE   | not DE  |
| EVM0022156 | LG10 | hypothetical protein CICLE_v1 | not DE   | not DE   | not DE   | not DE  |
| EVM0009924 | LG10 | hypothetical protein CICLE_v1 | not DE   | not DE   | not DE   | not DE  |
| EVM0009803 | LG10 | hypothetical protein CICLE_v1 | not DE   | not DE   | 1.433613 | #####   |
| EVM0019003 | LG10 | hypothetical protein CICLE_v1 | not DE   | not DE   | not DE   | not DE  |
| EVM0012583 | LG10 | hypothetical protein CICLE_v1 | not DE   | not DE   | not DE   | not DE  |
| EVM0005896 | LG10 | hypothetical protein CICLE_v1 | not DE   | not DE   | not DE   | not DE  |
| EVM0011302 | LG10 | hypothetical protein CICLE_v1 | not DE   | not DE   | not DE   | not DE  |
| EVM0024215 | LG10 | hypothetical protein CICLE_v1 | not DE   | not DE   | not DE   | not DE  |
| EVM0005859 | LG10 | hypothetical protein CICLE_v1 | not DE   | not DE   | not DE   | not DE  |
| EVM0003945 | LG10 | hypothetical protein CICLE_v1 | not DE   | not DE   | not DE   | not DE  |
| EVM0005751 | LG10 | hypothetical protein CICLE_v1 | not DE   | not DE   | not DE   | not DE  |
| EVM0006711 | LG10 | hypothetical protein CICLE_v1 | not DE   | not DE   | not DE   | not DE  |
| EVM0018929 | LG10 | hypothetical protein CICLE_v1 | not DE   | not DE   | not DE   | not DE  |
| EVM0017397 | LG10 | hypothetical protein CICLE_v1 | not DE   | not DE   | not DE   | not DE  |
| EVM0008309 | LG10 | hypothetical protein CICLE_v1 | not DE   | not DE   | not DE   | not DE  |
| EVM0006596 | LG10 | hypothetical protein CICLE_v1 | not DE   | not DE   | not DE   | not DE  |

|            |      |                               |          |          |          |         |
|------------|------|-------------------------------|----------|----------|----------|---------|
| EVM0005862 | LG10 | hypothetical protein CICLE_v1 | not DE   | not DE   | not DE   | not DE  |
| EVM0013484 | LG10 | hypothetical protein CICLE_v1 | not DE   | not DE   | not DE   | not DE  |
| EVM0003463 | LG10 | hypothetical protein CICLE_v1 | not DE   | not DE   | not DE   | not DE  |
| EVM0009460 | LG10 | hypothetical protein CICLE_v1 | not DE   | not DE   | not DE   | not DE  |
| EVM0003298 | LG10 | hypothetical protein CICLE_v1 | not DE   | not DE   | not DE   | not DE  |
| EVM0000735 | LG10 | hypothetical protein CICLE_v1 | not DE   | not DE   | not DE   | not DE  |
| EVM0009764 | LG10 | hypothetical protein CICLE_v1 | not DE   | not DE   | not DE   | not DE  |
| EVM0002085 | LG10 | hypothetical protein CICLE_v1 | not DE   | not DE   | -1.06238 | 0.00569 |
| EVM0006589 | LG10 | hypothetical protein CICLE_v1 | not DE   | not DE   | not DE   | not DE  |
| EVM0013246 | LG10 | hypothetical protein CICLE_v1 | not DE   | not DE   | not DE   | not DE  |
| EVM0022915 | LG10 | hypothetical protein CICLE_v1 | not DE   | not DE   | not DE   | not DE  |
| EVM0002368 | LG10 | hypothetical protein CICLE_v1 | not DE   | not DE   | not DE   | not DE  |
| EVM0018885 | LG10 | hypothetical protein CICLE_v1 | not DE   | not DE   | not DE   | not DE  |
| EVM0001789 | LG10 | hypothetical protein CICLE_v1 | not DE   | not DE   | not DE   | not DE  |
| EVM0000566 | LG10 | hypothetical protein CICLE_v1 | not DE   | not DE   | not DE   | not DE  |
| EVM0010415 | LG10 | hypothetical protein CICLE_v1 | not DE   | not DE   | not DE   | not DE  |
| EVM0014049 | LG10 | hypothetical protein CICLE_v1 | not DE   | not DE   | not DE   | not DE  |
| EVM0006689 | LG10 | hypothetical protein CICLE_v1 | not DE   | not DE   | not DE   | not DE  |
| EVM0008997 | LG10 | hypothetical protein CICLE_v1 | not DE   | not DE   | not DE   | not DE  |
| EVM0009312 | LG10 | hypothetical protein CICLE_v1 | not DE   | not DE   | not DE   | not DE  |
| EVM0011054 | LG10 | hypothetical protein CICLE_v1 | not DE   | not DE   | not DE   | not DE  |
| EVM0015465 | LG10 | hypothetical protein CICLE_v1 | not DE   | not DE   | not DE   | not DE  |
| EVM0020510 | LG10 | hypothetical protein CICLE_v1 | not DE   | not DE   | not DE   | not DE  |
| EVM0024346 | LG10 | hypothetical protein CICLE_v1 | not DE   | not DE   | not DE   | not DE  |
| EVM0014989 | LG10 | hypothetical protein CICLE_v1 | not DE   | not DE   | 2.578566 | 0.01054 |
| EVM0004582 | LG10 | hypothetical protein CICLE_v1 | not DE   | not DE   | not DE   | not DE  |
| EVM0001017 | LG10 | hypothetical protein CICLE_v1 | not DE   | not DE   | not DE   | not DE  |
| EVM0018971 | LG10 | hypothetical protein CICLE_v1 | not DE   | not DE   | not DE   | not DE  |
| EVM0006804 | LG10 | hypothetical protein CICLE_v1 | not DE   | not DE   | not DE   | not DE  |
| EVM0011595 | LG10 | hypothetical protein CICLE_v1 | not DE   | not DE   | not DE   | not DE  |
| EVM0014120 | LG10 | hypothetical protein CICLE_v1 | not DE   | not DE   | not DE   | not DE  |
| EVM0019318 | LG10 | hypothetical protein CICLE_v1 | not DE   | not DE   | not DE   | not DE  |
| EVM0006826 | LG10 | hypothetical protein CICLE_v1 | not DE   | not DE   | not DE   | not DE  |
| EVM0013559 | LG10 | hypothetical protein CICLE_v1 | not DE   | not DE   | not DE   | not DE  |
| EVM0006819 | LG10 | hypothetical protein CICLE_v1 | 1.955313 | 0.008608 | not DE   | not DE  |
| EVM0012817 | LG10 | hypothetical protein CICLE_v1 | not DE   | not DE   | not DE   | not DE  |
| EVM0018131 | LG10 | hypothetical protein CICLE_v1 | not DE   | not DE   | not DE   | not DE  |
| EVM0008815 | LG10 | hypothetical protein CICLE_v1 | not DE   | not DE   | not DE   | not DE  |
| EVM0003926 | LG10 | hypothetical protein CICLE_v1 | not DE   | not DE   | 1.097861 | 0.03818 |
| EVM0018773 | LG10 | hypothetical protein CICLE_v1 | not DE   | not DE   | not DE   | not DE  |
| EVM0019081 | LG10 | hypothetical protein CICLE_v1 | not DE   | not DE   | not DE   | not DE  |
| EVM0003521 | LG10 | hypothetical protein CICLE_v1 | not DE   | not DE   | not DE   | not DE  |
| EVM0004417 | LG10 | hypothetical protein CICLE_v1 | not DE   | not DE   | not DE   | not DE  |
| EVM0007514 | LG10 | hypothetical protein CICLE_v1 | not DE   | not DE   | not DE   | not DE  |
| EVM0020430 | LG10 | hypothetical protein CICLE_v1 | -1.69669 | 0.022098 | not DE   | not DE  |
| EVM0001254 | LG10 | hypothetical protein CICLE_v1 | not DE   | not DE   | -1.0799  | 0.00845 |
| EVM0012389 | LG10 | hypothetical protein CICLE_v1 | 1.137831 | 0.005827 | not DE   | not DE  |
| EVM0007831 | LG10 | hypothetical protein CICLE_v1 | not DE   | not DE   | not DE   | not DE  |
| EVM0023196 | LG10 | hypothetical protein CICLE_v1 | not DE   | not DE   | not DE   | not DE  |
| EVM0018762 | LG10 | hypothetical protein CICLE_v1 | not DE   | not DE   | not DE   | not DE  |
| EVM0005579 | LG10 | hypothetical protein CICLE_v1 | not DE   | not DE   | not DE   | not DE  |
| EVM0022454 | LG10 | hypothetical protein CICLE_v1 | not DE   | not DE   | not DE   | not DE  |
| EVM0009481 | LG10 | hypothetical protein CICLE_v1 | not DE   | not DE   | not DE   | not DE  |
| EVM0010230 | LG10 | hypothetical protein CICLE_v1 | not DE   | not DE   | not DE   | not DE  |

|            |      |                               |          |          |          |         |
|------------|------|-------------------------------|----------|----------|----------|---------|
| EVM0010521 | LG10 | hypothetical protein CICLE_v1 | not DE   | not DE   | not DE   | not DE  |
| EVM0014335 | LG10 | hypothetical protein CICLE_v1 | 1.180963 | 0.047006 | not DE   | not DE  |
| EVM0013463 | LG10 | hypothetical protein CICLE_v1 | not DE   | not DE   | not DE   | not DE  |
| EVM0014545 | LG10 | hypothetical protein CICLE_v1 | not DE   | not DE   | not DE   | not DE  |
| EVM0008963 | LG10 | hypothetical protein CICLE_v1 | not DE   | not DE   | not DE   | not DE  |
| EVM0009083 | LG10 | hypothetical protein CICLE_v1 | not DE   | not DE   | not DE   | not DE  |
| EVM0020115 | LG10 | hypothetical protein CICLE_v1 | not DE   | not DE   | not DE   | not DE  |
| EVM0009295 | LG10 | hypothetical protein CICLE_v1 | not DE   | not DE   | not DE   | not DE  |
| EVM0002744 | LG10 | hypothetical protein CICLE_v1 | not DE   | not DE   | not DE   | not DE  |
| EVM0011717 | LG10 | hypothetical protein CICLE_v1 | not DE   | not DE   | not DE   | not DE  |
| EVM0015765 | LG10 | hypothetical protein CICLE_v1 | not DE   | not DE   | not DE   | not DE  |
| EVM0000545 | LG10 | hypothetical protein CICLE_v1 | not DE   | not DE   | not DE   | not DE  |
| EVM0010719 | LG10 | hypothetical protein CICLE_v1 | not DE   | not DE   | not DE   | not DE  |
| EVM0000647 | LG10 | hypothetical protein CICLE_v1 | not DE   | not DE   | not DE   | not DE  |
| EVM0009624 | LG10 | hypothetical protein CICLE_v1 | not DE   | not DE   | not DE   | not DE  |
| EVM0022297 | LG10 | hypothetical protein CICLE_v1 | not DE   | not DE   | not DE   | not DE  |
| EVM0021801 | LG10 | hypothetical protein CICLE_v1 | not DE   | not DE   | not DE   | not DE  |
| EVM0018650 | LG10 | hypothetical protein CICLE_v1 | not DE   | not DE   | not DE   | not DE  |
| EVM0000301 | LG10 | hypothetical protein CICLE_v1 | not DE   | not DE   | -1.28679 | 0.0022  |
| EVM0004345 | LG10 | hypothetical protein CICLE_v1 | not DE   | not DE   | not DE   | not DE  |
| EVM0007663 | LG10 | hypothetical protein CICLE_v1 | not DE   | not DE   | not DE   | not DE  |
| EVM0006561 | LG10 | hypothetical protein CICLE_v1 | not DE   | not DE   | not DE   | not DE  |
| EVM0009840 | LG10 | hypothetical protein CICLE_v1 | not DE   | not DE   | not DE   | not DE  |
| EVM0017964 | LG10 | hypothetical protein CICLE_v1 | not DE   | not DE   | not DE   | not DE  |
| EVM0020412 | LG10 | hypothetical protein CICLE_v1 | not DE   | not DE   | not DE   | not DE  |
| EVM0014302 | LG10 | hypothetical protein CICLE_v1 | not DE   | not DE   | not DE   | not DE  |
| EVM0000313 | LG10 | hypothetical protein CICLE_v1 | not DE   | not DE   | not DE   | not DE  |
| EVM0000436 | LG10 | hypothetical protein CICLE_v1 | not DE   | not DE   | not DE   | not DE  |
| EVM0009620 | LG10 | hypothetical protein CICLE_v1 | not DE   | not DE   | not DE   | not DE  |
| EVM0012497 | LG10 | hypothetical protein CICLE_v1 | not DE   | not DE   | not DE   | not DE  |
| EVM0015370 | LG10 | hypothetical protein CICLE_v1 | not DE   | not DE   | not DE   | not DE  |
| EVM0018884 | LG10 | hypothetical protein CICLE_v1 | not DE   | not DE   | not DE   | not DE  |
| EVM0020838 | LG10 | hypothetical protein CICLE_v1 | not DE   | not DE   | not DE   | not DE  |
| EVM0018870 | LG10 | hypothetical protein CICLE_v1 | not DE   | not DE   | 1.619257 | 0.02552 |
| EVM0018059 | LG10 | hypothetical protein CICLE_v1 | 2.302508 | 0.031315 | 1.372494 | 0.02575 |
| EVM0023501 | LG10 | hypothetical protein CICLE_v1 | not DE   | not DE   | not DE   | not DE  |
| EVM0018033 | LG10 | hypothetical protein CICLE_v1 | not DE   | not DE   | not DE   | not DE  |
| EVM0024328 | LG10 | hypothetical protein CICLE_v1 | not DE   | not DE   | not DE   | not DE  |
| EVM0000009 | LG10 | hypothetical protein CICLE_v1 | not DE   | not DE   | not DE   | not DE  |
| EVM0021360 | LG10 | hypothetical protein CICLE_v1 | not DE   | not DE   | not DE   | not DE  |
| EVM0004886 | LG10 | hypothetical protein CICLE_v1 | not DE   | not DE   | 1.053683 | 0.02432 |
| EVM0013776 | LG10 | hypothetical protein CICLE_v1 | not DE   | not DE   | not DE   | not DE  |
| EVM0007201 | LG10 | hypothetical protein CICLE_v1 | not DE   | not DE   | not DE   | not DE  |
| EVM0016474 | LG10 | hypothetical protein CICLE_v1 | not DE   | not DE   | not DE   | not DE  |
| EVM0011455 | LG10 | hypothetical protein CICLE_v1 | not DE   | not DE   | not DE   | not DE  |
| EVM0011117 | LG10 | hypothetical protein CICLE_v1 | not DE   | not DE   | not DE   | not DE  |
| EVM0007338 | LG10 | hypothetical protein CICLE_v1 | not DE   | not DE   | not DE   | not DE  |
| EVM0020048 | LG10 | hypothetical protein CICLE_v1 | not DE   | not DE   | not DE   | not DE  |
| EVM0014359 | LG10 | hypothetical protein CICLE_v1 | not DE   | not DE   | not DE   | not DE  |
| EVM0000109 | LG10 | hypothetical protein CICLE_v1 | not DE   | not DE   | not DE   | not DE  |
| EVM0014716 | LG10 | hypothetical protein CICLE_v1 | not DE   | not DE   | not DE   | not DE  |
| EVM0020175 | LG10 | hypothetical protein CICLE_v1 | not DE   | not DE   | not DE   | not DE  |
| EVM0000868 | LG10 | hypothetical protein CICLE_v1 | not DE   | not DE   | not DE   | not DE  |
| EVM0001955 | LG10 | hypothetical protein CICLE_v1 | not DE   | not DE   | not DE   | not DE  |

|            |      |                               |          |          |          |         |
|------------|------|-------------------------------|----------|----------|----------|---------|
| EVM0002183 | LG10 | hypothetical protein CICLE_v1 | not DE   | not DE   | not DE   | not DE  |
| EVM0005745 | LG10 | hypothetical protein CICLE_v1 | not DE   | not DE   | not DE   | not DE  |
| EVM0015833 | LG10 | hypothetical protein CICLE_v1 | not DE   | not DE   | not DE   | not DE  |
| EVM0018583 | LG10 | hypothetical protein CICLE_v1 | not DE   | not DE   | not DE   | not DE  |
| EVM0022380 | LG10 | hypothetical protein CICLE_v1 | not DE   | not DE   | not DE   | not DE  |
| EVM0023122 | LG10 | hypothetical protein CICLE_v1 | not DE   | not DE   | not DE   | not DE  |
| EVM0010832 | LG10 | hypothetical protein CICLE_v1 | not DE   | not DE   | not DE   | not DE  |
| EVM0020806 | LG10 | hypothetical protein CICLE_v1 | not DE   | not DE   | -1.29731 | 0.03984 |
| EVM0004572 | LG10 | hypothetical protein CICLE_v1 | not DE   | not DE   | not DE   | not DE  |
| EVM0004410 | LG10 | hypothetical protein CICLE_v1 | not DE   | not DE   | not DE   | not DE  |
| EVM0019505 | LG10 | hypothetical protein CICLE_v1 | not DE   | not DE   | not DE   | not DE  |
| EVM0023758 | LG10 | hypothetical protein CICLE_v1 | not DE   | not DE   | not DE   | not DE  |
| EVM0001988 | LG10 | hypothetical protein CICLE_v1 | not DE   | not DE   | not DE   | not DE  |
| EVM0000149 | LG10 | hypothetical protein CICLE_v1 | not DE   | not DE   | not DE   | not DE  |
| EVM0020635 | LG10 | hypothetical protein CICLE_v1 | not DE   | not DE   | not DE   | not DE  |
| EVM0018515 | LG10 | hypothetical protein CICLE_v1 | -2.22655 | 0.006596 | not DE   | not DE  |
| EVM0011975 | LG10 | hypothetical protein CICLE_v1 | not DE   | not DE   | not DE   | not DE  |
| EVM0018389 | LG10 | hypothetical protein CICLE_v1 | not DE   | not DE   | not DE   | not DE  |
| EVM0007856 | LG10 | hypothetical protein CICLE_v1 | not DE   | not DE   | not DE   | not DE  |
| EVM0004337 | LG10 | hypothetical protein CICLE_v1 | not DE   | not DE   | not DE   | not DE  |
| EVM0002562 | LG10 | hypothetical protein CICLE_v1 | not DE   | not DE   | not DE   | not DE  |
| EVM0014769 | LG10 | hypothetical protein CICLE_v1 | not DE   | not DE   | 2.785086 | 0.00092 |
| EVM0019924 | LG10 | hypothetical protein CICLE_v1 | not DE   | not DE   | not DE   | not DE  |
| EVM0007728 | LG10 | hypothetical protein CICLE_v1 | not DE   | not DE   | not DE   | not DE  |
| EVM0022220 | LG10 | hypothetical protein CICLE_v1 | not DE   | not DE   | not DE   | not DE  |
| EVM0003892 | LG10 | hypothetical protein CICLE_v1 | not DE   | not DE   | not DE   | not DE  |
| EVM0018407 | LG10 | hypothetical protein CICLE_v1 | not DE   | not DE   | not DE   | not DE  |
| EVM0019650 | LG10 | hypothetical protein CICLE_v1 | not DE   | not DE   | not DE   | not DE  |
| EVM0023789 | LG10 | hypothetical protein CICLE_v1 | not DE   | not DE   | not DE   | not DE  |
| EVM0013963 | LG10 | hypothetical protein CICLE_v1 | not DE   | not DE   | not DE   | not DE  |
| EVM0014192 | LG10 | hypothetical protein CICLE_v1 | not DE   | not DE   | not DE   | not DE  |
| EVM0019555 | LG10 | hypothetical protein CICLE_v1 | not DE   | not DE   | not DE   | not DE  |
| EVM0014392 | LG10 | hypothetical protein CICLE_v1 | not DE   | not DE   | not DE   | not DE  |
| EVM0007066 | LG10 | hypothetical protein CICLE_v1 | not DE   | not DE   | not DE   | not DE  |
| EVM0004158 | LG10 | hypothetical protein CICLE_v1 | not DE   | not DE   | not DE   | not DE  |
| EVM0010398 | LG10 | hypothetical protein CICLE_v1 | not DE   | not DE   | not DE   | not DE  |
| EVM0011116 | LG10 | hypothetical protein CICLE_v1 | not DE   | not DE   | not DE   | not DE  |
| EVM0022840 | LG10 | hypothetical protein CICLE_v1 | not DE   | not DE   | not DE   | not DE  |
| EVM0005376 | LG10 | hypothetical protein CICLE_v1 | not DE   | not DE   | 3.07976  | 0.00233 |
| EVM0008925 | LG10 | hypothetical protein CICLE_v1 | not DE   | not DE   | not DE   | not DE  |
| EVM0016929 | LG10 | hypothetical protein CICLE_v1 | not DE   | not DE   | not DE   | not DE  |
| EVM0015020 | LG10 | hypothetical protein CICLE_v1 | not DE   | not DE   | not DE   | not DE  |
| EVM0005212 | LG10 | hypothetical protein CICLE_v1 | not DE   | not DE   | not DE   | not DE  |
| EVM0014641 | LG10 | hypothetical protein CICLE_v1 | not DE   | not DE   | not DE   | not DE  |
| EVM0004189 | LG10 | hypothetical protein CICLE_v1 | not DE   | not DE   | not DE   | not DE  |
| EVM0010478 | LG10 | hypothetical protein CICLE_v1 | not DE   | not DE   | not DE   | not DE  |
| EVM0009794 | LG10 | hypothetical protein CICLE_v1 | not DE   | not DE   | not DE   | not DE  |
| EVM0007365 | LG10 | hypothetical protein CICLE_v1 | not DE   | not DE   | 1.047138 | #####   |
| EVM0016067 | LG10 | hypothetical protein CICLE_v1 | not DE   | not DE   | not DE   | not DE  |
| EVM0003894 | LG10 | hypothetical protein CICLE_v1 | not DE   | not DE   | not DE   | not DE  |
| EVM0024340 | LG10 | hypothetical protein CICLE_v1 | not DE   | not DE   | not DE   | not DE  |
| EVM0009705 | LG10 | hypothetical protein CICLE_v1 | not DE   | not DE   | not DE   | not DE  |
| EVM0006822 | LG10 | hypothetical protein CICLE_v1 | not DE   | not DE   | not DE   | not DE  |
| EVM0018826 | LG10 | hypothetical protein CICLE_v1 | 3.103708 | 7.07E-11 | not DE   | not DE  |

|            |      |                               |          |          |          |         |
|------------|------|-------------------------------|----------|----------|----------|---------|
| EVM0019947 | LG10 | hypothetical protein CICLE_v1 | not DE   | not DE   | not DE   | not DE  |
| EVM0023105 | LG10 | hypothetical protein CICLE_v1 | not DE   | not DE   | not DE   | not DE  |
| EVM0022240 | LG10 | hypothetical protein CICLE_v1 | -1.54791 | 0.019691 | -2.07474 | 0.00022 |
| EVM0016413 | LG10 | hypothetical protein CICLE_v1 | not DE   | not DE   | not DE   | not DE  |
| EVM0000804 | LG10 | hypothetical protein CICLE_v1 | not DE   | not DE   | not DE   | not DE  |
| EVM0006838 | LG10 | hypothetical protein CICLE_v1 | not DE   | not DE   | not DE   | not DE  |
| EVM0018402 | LG10 | hypothetical protein CICLE_v1 | not DE   | not DE   | 1.039926 | #####   |
| EVM0016227 | LG10 | hypothetical protein CICLE_v1 | not DE   | not DE   | not DE   | not DE  |
| EVM0023764 | LG10 | hypothetical protein CICLE_v1 | not DE   | not DE   | not DE   | not DE  |
| EVM0001123 | LG10 | hypothetical protein CICLE_v1 | not DE   | not DE   | not DE   | not DE  |
| EVM0008396 | LG10 | hypothetical protein CICLE_v1 | not DE   | not DE   | not DE   | not DE  |
| EVM0022491 | LG10 | hypothetical protein CICLE_v1 | not DE   | not DE   | not DE   | not DE  |
| EVM0023150 | LG10 | hypothetical protein CICLE_v1 | not DE   | not DE   | not DE   | not DE  |
| EVM0016977 | LG10 | hypothetical protein CICLE_v1 | -1.44325 | 0.002909 | not DE   | not DE  |
| EVM0005578 | LG10 | hypothetical protein CICLE_v1 | not DE   | not DE   | not DE   | not DE  |
| EVM0006342 | LG10 | hypothetical protein CICLE_v1 | not DE   | not DE   | not DE   | not DE  |
| EVM0024036 | LG10 | hypothetical protein CICLE_v1 | not DE   | not DE   | not DE   | not DE  |
| EVM0022730 | LG10 | hypothetical protein CICLE_v1 | not DE   | not DE   | not DE   | not DE  |
| EVM0013869 | LG10 | hypothetical protein CICLE_v1 | not DE   | not DE   | not DE   | not DE  |
| EVM0014884 | LG10 | hypothetical protein CICLE_v1 | not DE   | not DE   | not DE   | not DE  |
| EVM0005597 | LG10 | hypothetical protein CICLE_v1 | not DE   | not DE   | not DE   | not DE  |
| EVM0023762 | LG10 | hypothetical protein CICLE_v1 | not DE   | not DE   | not DE   | not DE  |
| EVM0015384 | LG10 | hypothetical protein CICLE_v1 | not DE   | not DE   | not DE   | not DE  |
| EVM0016294 | LG10 | hypothetical protein CICLE_v1 | not DE   | not DE   | not DE   | not DE  |
| EVM0018890 | LG10 | hypothetical protein CICLE_v1 | not DE   | not DE   | not DE   | not DE  |
| EVM0018381 | LG10 | hypothetical protein CICLE_v1 | not DE   | not DE   | not DE   | not DE  |
| EVM0023621 | LG10 | hypothetical protein CICLE_v1 | not DE   | not DE   | not DE   | not DE  |
| EVM0012777 | LG10 | hypothetical protein CICLE_v1 | not DE   | not DE   | not DE   | not DE  |
| EVM0000532 | LG10 | hypothetical protein CICLE_v1 | 1.8831   | 0.00826  | not DE   | not DE  |
| EVM0009517 | LG10 | hypothetical protein CICLE_v1 | not DE   | not DE   | not DE   | not DE  |
| EVM0002035 | LG10 | hypothetical protein CICLE_v1 | not DE   | not DE   | not DE   | not DE  |
| EVM0021519 | LG10 | hypothetical protein CICLE_v1 | not DE   | not DE   | not DE   | not DE  |
| EVM0009581 | LG10 | hypothetical protein CICLE_v1 | -1.70575 | 0.000374 | not DE   | not DE  |
| EVM0004008 | LG10 | hypothetical protein CICLE_v1 | not DE   | not DE   | 1.481658 | 0.00033 |
| EVM0015004 | LG10 | hypothetical protein CICLE_v1 | not DE   | not DE   | not DE   | not DE  |
| EVM0004650 | LG10 | hypothetical protein CICLE_v1 | not DE   | not DE   | not DE   | not DE  |
| EVM0019237 | LG10 | hypothetical protein CICLE_v1 | not DE   | not DE   | not DE   | not DE  |
| EVM0009622 | LG10 | hypothetical protein CICLE_v1 | not DE   | not DE   | 1.009548 | 0.03272 |
| EVM0011569 | LG10 | hypothetical protein CICLE_v1 | not DE   | not DE   | not DE   | not DE  |
| EVM0000849 | LG10 | hypothetical protein CICLE_v1 | not DE   | not DE   | not DE   | not DE  |
| EVM0022906 | LG10 | hypothetical protein CICLE_v1 | not DE   | not DE   | not DE   | not DE  |
| EVM0010923 | LG10 | hypothetical protein CICLE_v1 | not DE   | not DE   | not DE   | not DE  |
| EVM0018548 | LG10 | hypothetical protein CICLE_v1 | not DE   | not DE   | not DE   | not DE  |
| EVM0015038 | LG10 | hypothetical protein CICLE_v1 | not DE   | not DE   | not DE   | not DE  |
| EVM0022837 | LG10 | hypothetical protein CICLE_v1 | not DE   | not DE   | not DE   | not DE  |
| EVM0015270 | LG10 | hypothetical protein CICLE_v1 | 3.437125 | 0.040053 | not DE   | not DE  |
| EVM0015507 | LG10 | hypothetical protein CICLE_v1 | not DE   | not DE   | 1.622607 | 0.0002  |
| EVM0019104 | LG10 | hypothetical protein CICLE_v1 | not DE   | not DE   | not DE   | not DE  |
| EVM0014109 | LG10 | hypothetical protein CICLE_v1 | not DE   | not DE   | not DE   | not DE  |
| EVM0014682 | LG10 | hypothetical protein CICLE_v1 | not DE   | not DE   | not DE   | not DE  |
| EVM0016776 | LG10 | hypothetical protein CICLE_v1 | not DE   | not DE   | not DE   | not DE  |
| EVM0006620 | LG10 | hypothetical protein CICLE_v1 | not DE   | not DE   | not DE   | not DE  |
| EVM0021170 | LG10 | hypothetical protein CICLE_v1 | not DE   | not DE   | not DE   | not DE  |
| EVM0020032 | LG10 | hypothetical protein CICLE_v1 | not DE   | not DE   | not DE   | not DE  |



|            |      |                               |          |          |          |         |
|------------|------|-------------------------------|----------|----------|----------|---------|
| EVM0017178 | LG10 | hypothetical protein CICLE_v1 | not DE   | not DE   | not DE   | not DE  |
| EVM0000391 | LG10 | hypothetical protein CICLE_v1 | not DE   | not DE   | not DE   | not DE  |
| EVM0020410 | LG10 | hypothetical protein CICLE_v1 | not DE   | not DE   | 1.571043 | #####   |
| EVM0001043 | LG10 | hypothetical protein CICLE_v1 | not DE   | not DE   | not DE   | not DE  |
| EVM0009184 | LG10 | hypothetical protein CICLE_v1 | -2.39912 | 0.017347 | not DE   | not DE  |
| EVM0005869 | LG10 | hypothetical protein CICLE_v1 | not DE   | not DE   | not DE   | not DE  |
| EVM0008231 | LG10 | hypothetical protein CICLE_v1 | not DE   | not DE   | not DE   | not DE  |
| EVM0011680 | LG10 | hypothetical protein CICLE_v1 | not DE   | not DE   | not DE   | not DE  |
| EVM0007964 | LG10 | hypothetical protein CICLE_v1 | -1.02148 | 0.031363 | not DE   | not DE  |
| EVM0016928 | LG10 | hypothetical protein CICLE_v1 | not DE   | not DE   | not DE   | not DE  |
| EVM0006036 | LG10 | hypothetical protein CICLE_v1 | not DE   | not DE   | not DE   | not DE  |
| EVM0011702 | LG10 | hypothetical protein CICLE_v1 | not DE   | not DE   | not DE   | not DE  |
| EVM0007032 | LG10 | hypothetical protein CICLE_v1 | not DE   | not DE   | not DE   | not DE  |
| EVM0015073 | LG10 | hypothetical protein CICLE_v1 | not DE   | not DE   | not DE   | not DE  |
| EVM0002080 | LG10 | hypothetical protein CICLE_v1 | not DE   | not DE   | not DE   | not DE  |
| EVM0006817 | LG10 | hypothetical protein CICLE_v1 | not DE   | not DE   | not DE   | not DE  |
| EVM0003794 | LG10 | hypothetical protein CICLE_v1 | not DE   | not DE   | not DE   | not DE  |
| EVM0016955 | LG10 | hypothetical protein CICLE_v1 | not DE   | not DE   | not DE   | not DE  |
| EVM0004612 | LG10 | hypothetical protein CICLE_v1 | not DE   | not DE   | not DE   | not DE  |
| EVM0010581 | LG10 | hypothetical protein CICLE_v1 | not DE   | not DE   | not DE   | not DE  |
| EVM0012226 | LG10 | hypothetical protein CICLE_v1 | not DE   | not DE   | not DE   | not DE  |
| EVM0000578 | LG10 | hypothetical protein CICLE_v1 | not DE   | not DE   | not DE   | not DE  |
| EVM0007132 | LG10 | hypothetical protein CICLE_v1 | not DE   | not DE   | not DE   | not DE  |
| EVM0022201 | LG10 | hypothetical protein CICLE_v1 | not DE   | not DE   | not DE   | not DE  |
| EVM0015151 | LG10 | hypothetical protein CICLE_v1 | not DE   | not DE   | not DE   | not DE  |
| EVM0020797 | LG10 | hypothetical protein CICLE_v1 | not DE   | not DE   | not DE   | not DE  |
| EVM0010228 | LG10 | hypothetical protein CICLE_v1 | not DE   | not DE   | not DE   | not DE  |
| EVM0023058 | LG10 | hypothetical protein CICLE_v1 | not DE   | not DE   | not DE   | not DE  |
| EVM0014770 | LG10 | hypothetical protein CICLE_v1 | not DE   | not DE   | not DE   | not DE  |
| EVM0007686 | LG10 | hypothetical protein CICLE_v1 | not DE   | not DE   | not DE   | not DE  |
| EVM0017309 | LG10 | hypothetical protein CICLE_v1 | not DE   | not DE   | not DE   | not DE  |
| EVM0013338 | LG10 | hypothetical protein CICLE_v1 | not DE   | not DE   | not DE   | not DE  |
| EVM0013895 | LG10 | hypothetical protein CICLE_v1 | not DE   | not DE   | not DE   | not DE  |
| EVM0006802 | LG10 | hypothetical protein CICLE_v1 | not DE   | not DE   | not DE   | not DE  |
| EVM0016562 | LG10 | hypothetical protein CICLE_v1 | -1.08962 | 0.005192 | not DE   | not DE  |
| EVM0000112 | LG10 | hypothetical protein CICLE_v1 | not DE   | not DE   | not DE   | not DE  |
| EVM0000953 | LG10 | hypothetical protein CICLE_v1 | not DE   | not DE   | -4.14041 | 0.01265 |
| EVM0005499 | LG10 | hypothetical protein CICLE_v1 | not DE   | not DE   | not DE   | not DE  |
| EVM0006844 | LG10 | hypothetical protein CICLE_v1 | not DE   | not DE   | not DE   | not DE  |
| EVM0013589 | LG10 | hypothetical protein CICLE_v1 | not DE   | not DE   | not DE   | not DE  |
| EVM0021034 | LG10 | hypothetical protein CICLE_v1 | not DE   | not DE   | not DE   | not DE  |
| EVM0022020 | LG10 | hypothetical protein CICLE_v1 | not DE   | not DE   | not DE   | not DE  |
| EVM0022932 | LG10 | hypothetical protein CICLE_v1 | not DE   | not DE   | not DE   | not DE  |
| EVM0024241 | LG10 | hypothetical protein CICLE_v1 | not DE   | not DE   | not DE   | not DE  |
| EVM0024452 | LG10 | hypothetical protein CICLE_v1 | not DE   | not DE   | not DE   | not DE  |
| EVM0006823 | LG10 | hypothetical protein CICLE_v1 | not DE   | not DE   | not DE   | not DE  |
| EVM0011451 | LG10 | hypothetical protein CICLE_v1 | 1.189817 | 0.001581 | not DE   | not DE  |
| EVM0000798 | LG10 | hypothetical protein CICLE_v1 | not DE   | not DE   | not DE   | not DE  |
| EVM0016202 | LG10 | hypothetical protein CICLE_v1 | 1.247458 | 0.005386 | 1.467992 | 0.02199 |
| EVM0011305 | LG10 | hypothetical protein CICLE_v1 | not DE   | not DE   | not DE   | not DE  |
| EVM0002267 | LG10 | hypothetical protein CICLE_v1 | not DE   | not DE   | not DE   | not DE  |
| EVM0002346 | LG10 | hypothetical protein CICLE_v1 | not DE   | not DE   | not DE   | not DE  |
| EVM0011596 | LG10 | hypothetical protein CICLE_v1 | not DE   | not DE   | not DE   | not DE  |
| EVM0006428 | LG10 | hypothetical protein CISIN_1g | not DE   | not DE   | -1.2518  | 0.00027 |



|            |      |                               |          |          |          |         |
|------------|------|-------------------------------|----------|----------|----------|---------|
| EVM0005512 | LG10 | hypothetical protein CISIN_1g | not DE   | not DE   | not DE   | not DE  |
| EVM0020746 | LG10 | hypothetical protein CISIN_1g | not DE   | not DE   | not DE   | not DE  |
| EVM0004361 | LG10 | hypothetical protein CISIN_1g | not DE   | not DE   | not DE   | not DE  |
| EVM0022139 | LG10 | hypothetical protein CISIN_1g | not DE   | not DE   | not DE   | not DE  |
| EVM0001301 | LG10 | hypothetical protein CISIN_1g | not DE   | not DE   | not DE   | not DE  |
| EVM0006452 | LG10 | hypothetical protein CISIN_1g | not DE   | not DE   | not DE   | not DE  |
| EVM0016448 | LG10 | hypothetical protein CISIN_1g | not DE   | not DE   | not DE   | not DE  |
| EVM0020677 | LG10 | hypothetical protein CISIN_1g | not DE   | not DE   | not DE   | not DE  |
| EVM0004133 | LG10 | hypothetical protein CISIN_1g | not DE   | not DE   | not DE   | not DE  |
| EVM0014908 | LG10 | hypothetical protein CISIN_1g | not DE   | not DE   | 1.364741 | 0.00111 |
| EVM0009293 | LG10 | hypothetical protein CISIN_1g | not DE   | not DE   | not DE   | not DE  |
| EVM0010376 | LG10 | hypothetical protein CISIN_1g | not DE   | not DE   | not DE   | not DE  |
| EVM0020830 | LG10 | hypothetical protein CISIN_1g | not DE   | not DE   | not DE   | not DE  |
| EVM0023930 | LG10 | hypothetical protein CISIN_1g | not DE   | not DE   | not DE   | not DE  |
| EVM0002113 | LG10 | hypothetical protein CISIN_1g | not DE   | not DE   | not DE   | not DE  |
| EVM0019918 | LG10 | hypothetical protein CISIN_1g | not DE   | not DE   | not DE   | not DE  |
| EVM0023891 | LG10 | hypothetical protein CISIN_1g | not DE   | not DE   | not DE   | not DE  |
| EVM0011713 | LG10 | hypothetical protein CISIN_1g | not DE   | not DE   | not DE   | not DE  |
| EVM0015711 | LG10 | hypothetical protein CISIN_1g | not DE   | not DE   | not DE   | not DE  |
| EVM0022142 | LG10 | hypothetical protein CISIN_1g | not DE   | not DE   | not DE   | not DE  |
| EVM0000147 | LG10 | hypothetical protein CISIN_1g | not DE   | not DE   | not DE   | not DE  |
| EVM0021847 | LG10 | hypothetical protein CISIN_1g | not DE   | not DE   | not DE   | not DE  |
| EVM0023005 | LG10 | hypothetical protein CISIN_1g | not DE   | not DE   | not DE   | not DE  |
| EVM0021643 | LG10 | hypothetical protein CISIN_1g | not DE   | not DE   | not DE   | not DE  |
| EVM0017735 | LG10 | hypothetical protein CISIN_1g | not DE   | not DE   | not DE   | not DE  |
| EVM0023166 | LG10 | hypothetical protein CISIN_1g | not DE   | not DE   | not DE   | not DE  |
| EVM0013158 | LG10 | hypothetical protein CISIN_1g | not DE   | not DE   | not DE   | not DE  |
| EVM0002127 | LG10 | hypothetical protein CISIN_1g | not DE   | not DE   | not DE   | not DE  |
| EVM0007238 | LG10 | hypothetical protein CISIN_1g | not DE   | not DE   | not DE   | not DE  |
| EVM0001630 | LG10 | hypothetical protein CISIN_1g | not DE   | not DE   | not DE   | not DE  |
| EVM0013411 | LG10 | hypothetical protein CISIN_1g | not DE   | not DE   | not DE   | not DE  |
| EVM0003668 | LG10 | hypothetical protein CISIN_1g | not DE   | not DE   | not DE   | not DE  |
| EVM0011576 | LG10 | hypothetical protein CISIN_1g | not DE   | not DE   | not DE   | not DE  |
| EVM0010423 | LG10 | hypothetical protein CISIN_1g | not DE   | not DE   | not DE   | not DE  |
| EVM0016325 | LG10 | hypothetical protein CISIN_1g | not DE   | not DE   | not DE   | not DE  |
| EVM0005603 | LG10 | hypothetical protein CISIN_1g | not DE   | not DE   | not DE   | not DE  |
| EVM0005471 | LG10 | hypothetical protein CISIN_1g | not DE   | not DE   | not DE   | not DE  |
| EVM0018251 | LG10 | hypothetical protein CISIN_1g | not DE   | not DE   | not DE   | not DE  |
| EVM0012364 | LG10 | hypothetical protein CISIN_1g | not DE   | not DE   | not DE   | not DE  |
| EVM0023684 | LG10 | hypothetical protein CISIN_1g | not DE   | not DE   | not DE   | not DE  |
| EVM0015525 | LG10 | hypothetical protein CISIN_1g | 1.88405  | 0.03761  | not DE   | not DE  |
| EVM0022738 | LG10 | hypothetical protein CISIN_1g | not DE   | not DE   | not DE   | not DE  |
| EVM0021984 | LG10 | hypothetical protein CISIN_1g | -1.03444 | 0.013866 | not DE   | not DE  |
| EVM0008868 | LG10 | hypothetical protein CISIN_1g | not DE   | not DE   | not DE   | not DE  |
| EVM0019659 | LG10 | hypothetical protein CISIN_1g | not DE   | not DE   | 1.633594 | 0.00528 |
| EVM0015220 | LG10 | hypothetical protein CISIN_1g | not DE   | not DE   | not DE   | not DE  |
| EVM0005777 | LG10 | hypothetical protein CISIN_1g | not DE   | not DE   | not DE   | not DE  |
| EVM0007895 | LG10 | hypothetical protein CISIN_1g | not DE   | not DE   | not DE   | not DE  |
| EVM0007840 | LG10 | hypothetical protein CISIN_1g | not DE   | not DE   | not DE   | not DE  |
| EVM0009188 | LG10 | hypothetical protein CISIN_1g | not DE   | not DE   | not DE   | not DE  |
| EVM0018144 | LG10 | hypothetical protein CISIN_1g | not DE   | not DE   | not DE   | not DE  |
| EVM0012082 | LG10 | hypothetical protein CISIN_1g | not DE   | not DE   | not DE   | not DE  |
| EVM0021495 | LG10 | hypothetical protein CISIN_1g | 1.346424 | 0.027156 | 1.201561 | 0.00019 |
| EVM0014173 | LG10 | hypothetical protein CISIN_1g | not DE   | not DE   | not DE   | not DE  |

|            |      |                               |          |          |          |        |
|------------|------|-------------------------------|----------|----------|----------|--------|
| EVM0004994 | LG10 | hypothetical protein CISIN_1g | not DE   | not DE   | not DE   | not DE |
| EVM0017889 | LG10 | hypothetical protein CISIN_1g | not DE   | not DE   | not DE   | not DE |
| EVM0018539 | LG10 | hypothetical protein CISIN_1g | not DE   | not DE   | 2.253768 | #####  |
| EVM0005174 | LG10 | hypothetical protein CISIN_1g | not DE   | not DE   | not DE   | not DE |
| EVM0016403 | LG10 | hypothetical protein CISIN_1g | not DE   | not DE   | not DE   | not DE |
| EVM0022210 | LG10 | hypothetical protein CISIN_1g | not DE   | not DE   | not DE   | not DE |
| EVM0014169 | LG10 | hypothetical protein CISIN_1g | 2.341826 | 0.02448  | not DE   | not DE |
| EVM0002193 | LG10 | hypothetical protein CISIN_1g | not DE   | not DE   | not DE   | not DE |
| EVM0020802 | LG10 | hypothetical protein CISIN_1g | not DE   | not DE   | not DE   | not DE |
| EVM0020576 | LG10 | hypothetical protein CISIN_1g | not DE   | not DE   | not DE   | not DE |
| EVM0006433 | LG10 | hypothetical protein CISIN_1g | not DE   | not DE   | not DE   | not DE |
| EVM0021158 | LG10 | hypothetical protein CISIN_1g | not DE   | not DE   | not DE   | not DE |
| EVM0024384 | LG10 | hypothetical protein CISIN_1g | not DE   | not DE   | not DE   | not DE |
| EVM0012332 | LG10 | hypothetical protein CISIN_1g | not DE   | not DE   | not DE   | not DE |
| EVM0003041 | LG10 | hypothetical protein CISIN_1g | not DE   | not DE   | not DE   | not DE |
| EVM0013343 | LG10 | hypothetical protein CISIN_1g | not DE   | not DE   | not DE   | not DE |
| EVM0012284 | LG10 | hypothetical protein CISIN_1g | not DE   | not DE   | not DE   | not DE |
| EVM0015713 | LG10 | hypothetical protein CISIN_1g | not DE   | not DE   | not DE   | not DE |
| EVM0003996 | LG10 | hypothetical protein CISIN_1g | not DE   | not DE   | not DE   | not DE |
| EVM0021891 | LG10 | hypothetical protein CISIN_1g | not DE   | not DE   | not DE   | not DE |
| EVM0024312 | LG10 | hypothetical protein CISIN_1g | not DE   | not DE   | not DE   | not DE |
| EVM0021707 | LG10 | hypothetical protein CISIN_1g | not DE   | not DE   | not DE   | not DE |
| EVM0016109 | LG10 | hypothetical protein CISIN_1g | not DE   | not DE   | not DE   | not DE |
| EVM0023711 | LG10 | hypothetical protein CISIN_1g | not DE   | not DE   | not DE   | not DE |
| EVM0006686 | LG10 | hypothetical protein CISIN_1g | not DE   | not DE   | not DE   | not DE |
| EVM0001979 | LG10 | hypothetical protein CISIN_1g | not DE   | not DE   | not DE   | not DE |
| EVM0011586 | LG10 | hypothetical protein CISIN_1g | not DE   | not DE   | not DE   | not DE |
| EVM0023167 | LG10 | hypothetical protein CISIN_1g | not DE   | not DE   | not DE   | not DE |
| EVM0002190 | LG10 | hypothetical protein CISIN_1g | not DE   | not DE   | not DE   | not DE |
| EVM0021359 | LG10 | hypothetical protein CISIN_1g | not DE   | not DE   | not DE   | not DE |
| EVM0019829 | LG10 | hypothetical protein CISIN_1g | not DE   | not DE   | not DE   | not DE |
| EVM0012603 | LG10 | hypothetical protein CISIN_1g | not DE   | not DE   | not DE   | not DE |
| EVM0017252 | LG10 | hypothetical protein CISIN_1g | not DE   | not DE   | not DE   | not DE |
| EVM0000176 | LG10 | hypothetical protein CISIN_1g | not DE   | not DE   | not DE   | not DE |
| EVM0013490 | LG10 | hypothetical protein CISIN_1g | not DE   | not DE   | not DE   | not DE |
| EVM0019684 | LG10 | hypothetical protein CISIN_1g | not DE   | not DE   | not DE   | not DE |
| EVM0009682 | LG10 | hypothetical protein CISIN_1g | not DE   | not DE   | not DE   | not DE |
| EVM0001748 | LG10 | hypothetical protein CISIN_1g | not DE   | not DE   | not DE   | not DE |
| EVM0001481 | LG10 | hypothetical protein CISIN_1g | not DE   | not DE   | not DE   | not DE |
| EVM0017222 | LG10 | hypothetical protein CISIN_1g | not DE   | not DE   | not DE   | not DE |
| EVM0011464 | LG10 | hypothetical protein CISIN_1g | not DE   | not DE   | not DE   | not DE |
| EVM0012856 | LG10 | hypothetical protein CISIN_1g | not DE   | not DE   | not DE   | not DE |
| EVM0019281 | LG10 | hypothetical protein CISIN_1g | not DE   | not DE   | not DE   | not DE |
| EVM0024353 | LG10 | hypothetical protein CISIN_1g | not DE   | not DE   | not DE   | not DE |
| EVM0006841 | LG10 | hypothetical protein CISIN_1g | not DE   | not DE   | not DE   | not DE |
| EVM0023250 | LG10 | hypothetical protein CISIN_1g | not DE   | not DE   | not DE   | not DE |
| EVM0010798 | LG10 | hypothetical protein CISIN_1g | not DE   | not DE   | not DE   | not DE |
| EVM0018506 | LG10 | hypothetical protein CISIN_1g | not DE   | not DE   | not DE   | not DE |
| EVM0006056 | LG10 | hypothetical protein CISIN_1g | not DE   | not DE   | not DE   | not DE |
| EVM0018707 | LG10 | hypothetical protein EUGRSUZ_ | not DE   | not DE   | not DE   | not DE |
| EVM0019815 | LG10 | hypothetical protein EUGRSUZ_ | -3.37995 | 0.046448 | not DE   | not DE |
| EVM0020822 | LG10 | hypothetical protein EUTSA_v1 | not DE   | not DE   | not DE   | not DE |
| EVM0017865 | LG10 | hypothetical protein F383_084 | not DE   | not DE   | not DE   | not DE |
| EVM0008645 | LG10 | hypothetical protein F383_355 | not DE   | not DE   | not DE   | not DE |

|            |      |                               |          |          |        |        |
|------------|------|-------------------------------|----------|----------|--------|--------|
| EVM0024031 | LG10 | hypothetical protein F383_355 | not DE   | not DE   | not DE | not DE |
| EVM0013306 | LG10 | hypothetical protein JCGZ_015 | not DE   | not DE   | not DE | not DE |
| EVM0002865 | LG10 | hypothetical protein JCGZ_053 | not DE   | not DE   | not DE | not DE |
| EVM0007226 | LG10 | hypothetical protein JCGZ_053 | not DE   | not DE   | not DE | not DE |
| EVM0014467 | LG10 | hypothetical protein JCGZ_064 | not DE   | not DE   | not DE | not DE |
| EVM0023199 | LG10 | hypothetical protein JCGZ_065 | -1.50818 | 0.014212 | not DE | not DE |
| EVM0008097 | LG10 | hypothetical protein JCGZ_079 | not DE   | not DE   | not DE | not DE |
| EVM0018591 | LG10 | hypothetical protein JCGZ_093 | not DE   | not DE   | not DE | not DE |
| EVM0013392 | LG10 | hypothetical protein JCGZ_093 | not DE   | not DE   | not DE | not DE |
| EVM0023324 | LG10 | hypothetical protein JCGZ_093 | 1.717956 | 0.011401 | not DE | not DE |
| EVM0002047 | LG10 | hypothetical protein JCGZ_094 | not DE   | not DE   | not DE | not DE |
| EVM0007294 | LG10 | hypothetical protein JCGZ_112 | not DE   | not DE   | not DE | not DE |
| EVM0005270 | LG10 | hypothetical protein JCGZ_122 | not DE   | not DE   | not DE | not DE |
| EVM0018669 | LG10 | hypothetical protein JCGZ_122 | not DE   | not DE   | not DE | not DE |
| EVM0007702 | LG10 | hypothetical protein JCGZ_122 | not DE   | not DE   | not DE | not DE |
| EVM0003199 | LG10 | hypothetical protein JCGZ_122 | not DE   | not DE   | not DE | not DE |
| EVM0006806 | LG10 | hypothetical protein JCGZ_123 | not DE   | not DE   | not DE | not DE |
| EVM0018018 | LG10 | hypothetical protein JCGZ_123 | not DE   | not DE   | not DE | not DE |
| EVM0006650 | LG10 | hypothetical protein JCGZ_123 | not DE   | not DE   | not DE | not DE |
| EVM0012090 | LG10 | hypothetical protein JCGZ_123 | not DE   | not DE   | not DE | not DE |
| EVM0002738 | LG10 | hypothetical protein JCGZ_124 | not DE   | not DE   | not DE | not DE |
| EVM0013724 | LG10 | hypothetical protein JCGZ_124 | not DE   | not DE   | not DE | not DE |
| EVM0001412 | LG10 | hypothetical protein JCGZ_124 | not DE   | not DE   | not DE | not DE |
| EVM0005991 | LG10 | hypothetical protein JCGZ_124 | not DE   | not DE   | not DE | not DE |
| EVM0014898 | LG10 | hypothetical protein JCGZ_125 | not DE   | not DE   | not DE | not DE |
| EVM0014339 | LG10 | hypothetical protein JCGZ_125 | not DE   | not DE   | not DE | not DE |
| EVM0016999 | LG10 | hypothetical protein JCGZ_126 | not DE   | not DE   | not DE | not DE |
| EVM0016221 | LG10 | hypothetical protein JCGZ_126 | -1.20333 | 0.036181 | not DE | not DE |
| EVM0010648 | LG10 | hypothetical protein JCGZ_127 | not DE   | not DE   | not DE | not DE |
| EVM0009257 | LG10 | hypothetical protein JCGZ_128 | not DE   | not DE   | not DE | not DE |
| EVM0008610 | LG10 | hypothetical protein JCGZ_149 | not DE   | not DE   | not DE | not DE |
| EVM0018476 | LG10 | hypothetical protein JCGZ_169 | not DE   | not DE   | not DE | not DE |
| EVM0024363 | LG10 | hypothetical protein JCGZ_187 | not DE   | not DE   | not DE | not DE |
| EVM0020987 | LG10 | hypothetical protein JCGZ_187 | -1.16222 | 0.001478 | not DE | not DE |
| EVM0006567 | LG10 | hypothetical protein JCGZ_191 | not DE   | not DE   | not DE | not DE |
| EVM0020290 | LG10 | hypothetical protein JCGZ_191 | not DE   | not DE   | not DE | not DE |
| EVM0019039 | LG10 | hypothetical protein JCGZ_192 | not DE   | not DE   | not DE | not DE |
| EVM0003545 | LG10 | hypothetical protein JCGZ_222 | not DE   | not DE   | not DE | not DE |
| EVM0009989 | LG10 | hypothetical protein JCGZ_222 | not DE   | not DE   | not DE | not DE |
| EVM0011307 | LG10 | hypothetical protein JCGZ_222 | not DE   | not DE   | not DE | not DE |
| EVM0023228 | LG10 | hypothetical protein JCGZ_222 | not DE   | not DE   | not DE | not DE |
| EVM0007608 | LG10 | hypothetical protein JCGZ_223 | not DE   | not DE   | not DE | not DE |
| EVM0001727 | LG10 | hypothetical protein JCGZ_223 | not DE   | not DE   | not DE | not DE |
| EVM0017919 | LG10 | hypothetical protein JCGZ_223 | not DE   | not DE   | not DE | not DE |
| EVM0021826 | LG10 | hypothetical protein JCGZ_223 | not DE   | not DE   | not DE | not DE |
| EVM0019174 | LG10 | hypothetical protein JCGZ_223 | not DE   | not DE   | not DE | not DE |
| EVM0015481 | LG10 | hypothetical protein JCGZ_224 | not DE   | not DE   | not DE | not DE |
| EVM0021176 | LG10 | hypothetical protein JCGZ_240 | not DE   | not DE   | not DE | not DE |
| EVM0010372 | LG10 | hypothetical protein JCGZ_240 | not DE   | not DE   | not DE | not DE |
| EVM0000694 | LG10 | hypothetical protein JCGZ_242 | not DE   | not DE   | not DE | not DE |
| EVM0007362 | LG10 | hypothetical protein JCGZ_242 | not DE   | not DE   | not DE | not DE |
| EVM0007963 | LG10 | hypothetical protein JCGZ_244 | not DE   | not DE   | not DE | not DE |
| EVM0015487 | LG10 | hypothetical protein JCGZ_249 | not DE   | not DE   | not DE | not DE |
| EVM0022149 | LG10 | hypothetical protein JCGZ_249 | not DE   | not DE   | not DE | not DE |

|            |      |                               |          |          |        |        |
|------------|------|-------------------------------|----------|----------|--------|--------|
| EVM0007862 | LG10 | hypothetical protein JCGZ_254 | not DE   | not DE   | not DE | not DE |
| EVM0002098 | LG10 | hypothetical protein L484_000 | not DE   | not DE   | not DE | not DE |
| EVM0001593 | LG10 | hypothetical protein L484_013 | not DE   | not DE   | not DE | not DE |
| EVM0019235 | LG10 | hypothetical protein L484_013 | not DE   | not DE   | not DE | not DE |
| EVM0015485 | LG10 | hypothetical protein L484_014 | not DE   | not DE   | not DE | not DE |
| EVM0007519 | LG10 | hypothetical protein L484_020 | not DE   | not DE   | not DE | not DE |
| EVM0005398 | LG10 | hypothetical protein MIMGU_mg | not DE   | not DE   | not DE | not DE |
| EVM0003660 | LG10 | hypothetical protein PHAVU_00 | not DE   | not DE   | not DE | not DE |
| EVM0006659 | LG10 | hypothetical protein PHAVU_00 | not DE   | not DE   | not DE | not DE |
| EVM0005939 | LG10 | hypothetical protein PHAVU_01 | not DE   | not DE   | not DE | not DE |
| EVM0021179 | LG10 | hypothetical protein POPTR_00 | not DE   | not DE   | not DE | not DE |
| EVM0010623 | LG10 | hypothetical protein POPTR_00 | not DE   | not DE   | not DE | not DE |
| EVM0011118 | LG10 | hypothetical protein POPTR_00 | -2.26915 | 0.009518 | not DE | not DE |
| EVM0008325 | LG10 | hypothetical protein POPTR_00 | -2.53719 | 0.04401  | not DE | not DE |
| EVM0016984 | LG10 | hypothetical protein POPTR_00 | not DE   | not DE   | not DE | not DE |
| EVM0002268 | LG10 | hypothetical protein POPTR_00 | not DE   | not DE   | not DE | not DE |
| EVM0002259 | LG10 | hypothetical protein POPTR_00 | not DE   | not DE   | not DE | not DE |
| EVM0010260 | LG10 | hypothetical protein POPTR_00 | not DE   | not DE   | not DE | not DE |
| EVM0006399 | LG10 | hypothetical protein POPTR_00 | not DE   | not DE   | not DE | not DE |
| EVM0002842 | LG10 | hypothetical protein POPTR_00 | not DE   | not DE   | not DE | not DE |
| EVM0002111 | LG10 | hypothetical protein POPTR_00 | not DE   | not DE   | not DE | not DE |
| EVM0006995 | LG10 | hypothetical protein POPTR_00 | not DE   | not DE   | not DE | not DE |
| EVM0000702 | LG10 | hypothetical protein POPTR_00 | not DE   | not DE   | not DE | not DE |
| EVM0012383 | LG10 | hypothetical protein POPTR_00 | not DE   | not DE   | not DE | not DE |
| EVM0001103 | LG10 | hypothetical protein POPTR_00 | not DE   | not DE   | not DE | not DE |
| EVM0002137 | LG10 | hypothetical protein POPTR_00 | not DE   | not DE   | not DE | not DE |
| EVM0019093 | LG10 | hypothetical protein POPTR_00 | not DE   | not DE   | not DE | not DE |
| EVM0000427 | LG10 | hypothetical protein POPTR_00 | not DE   | not DE   | not DE | not DE |
| EVM0008395 | LG10 | hypothetical protein POPTR_00 | not DE   | not DE   | not DE | not DE |
| EVM0004552 | LG10 | hypothetical protein POPTR_00 | not DE   | not DE   | not DE | not DE |
| EVM0011318 | LG10 | hypothetical protein POPTR_00 | not DE   | not DE   | not DE | not DE |
| EVM0023714 | LG10 | hypothetical protein POPTR_00 | not DE   | not DE   | not DE | not DE |
| EVM0022757 | LG10 | hypothetical protein PRUPE_pp | not DE   | not DE   | not DE | not DE |
| EVM0013448 | LG10 | hypothetical protein PRUPE_pp | not DE   | not DE   | not DE | not DE |
| EVM0022506 | LG10 | hypothetical protein PRUPE_pp | not DE   | not DE   | not DE | not DE |
| EVM0001173 | LG10 | hypothetical protein PRUPE_pp | not DE   | not DE   | not DE | not DE |
| EVM0018815 | LG10 | hypothetical protein PRUPE_pp | not DE   | not DE   | not DE | not DE |
| EVM0005464 | LG10 | hypothetical protein PRUPE_pp | not DE   | not DE   | not DE | not DE |
| EVM0008588 | LG10 | hypothetical protein PRUPE_pp | not DE   | not DE   | not DE | not DE |
| EVM0004836 | LG10 | hypothetical protein PRUPE_pp | not DE   | not DE   | not DE | not DE |
| EVM0014307 | LG10 | hypothetical protein PRUPE_pp | not DE   | not DE   | not DE | not DE |
| EVM0020952 | LG10 | hypothetical protein PRUPE_pp | not DE   | not DE   | not DE | not DE |
| EVM0015553 | LG10 | hypothetical protein PRUPE_pp | not DE   | not DE   | not DE | not DE |
| EVM0005501 | LG10 | hypothetical protein PRUPE_pp | not DE   | not DE   | not DE | not DE |
| EVM0017104 | LG10 | hypothetical protein PRUPE_pp | not DE   | not DE   | not DE | not DE |
| EVM0005048 | LG10 | hypothetical protein TCM_0013 | not DE   | not DE   | not DE | not DE |
| EVM0011301 | LG10 | hypothetical protein VITISV_0 | not DE   | not DE   | not DE | not DE |
| EVM0014428 | LG10 | hypothetical protein VITISV_0 | not DE   | not DE   | not DE | not DE |
| EVM0021862 | LG10 | hypothetical protein VITISV_0 | not DE   | not DE   | not DE | not DE |
| EVM0003717 | LG10 | hypothetical protein VITISV_0 | not DE   | not DE   | not DE | not DE |
| EVM0005558 | LG10 | hypothetical protein VITISV_0 | not DE   | not DE   | not DE | not DE |
| EVM0023325 | LG10 | hypothetical protein VITISV_0 | not DE   | not DE   | not DE | not DE |
| EVM0010137 | LG10 | hypothetical protein VITISV_0 | not DE   | not DE   | not DE | not DE |
| EVM0013346 | LG10 | hypothetical protein VITISV_0 | not DE   | not DE   | not DE | not DE |

|            |      |                               |          |          |        |        |
|------------|------|-------------------------------|----------|----------|--------|--------|
| EVM0021024 | LG10 | hypothetical protein VITISV_C | not DE   | not DE   | not DE | not DE |
| EVM0005178 | LG10 | hypothetical protein VITISV_C | not DE   | not DE   | not DE | not DE |
| EVM0009265 | LG10 | hypothetical protein VITISV_C | not DE   | not DE   | not DE | not DE |
| EVM0011286 | LG10 | hypothetical protein VITISV_C | not DE   | not DE   | not DE | not DE |
| EVM0001872 | LG10 | hypothetical protein VITISV_C | not DE   | not DE   | not DE | not DE |
| EVM0009348 | LG10 | hypothetical protein VITISV_C | not DE   | not DE   | not DE | not DE |
| EVM0016589 | LG10 | hypothetical protein VITISV_C | not DE   | not DE   | not DE | not DE |
| EVM0001519 | LG10 | hypothetical protein VITISV_C | not DE   | not DE   | not DE | not DE |
| EVM0022324 | LG10 | hypothetical protein VITISV_C | not DE   | not DE   | not DE | not DE |
| EVM0000435 | LG10 | hypothetical protein VITISV_C | not DE   | not DE   | not DE | not DE |
| EVM0010474 | LG10 | hypothetical protein VITISV_C | not DE   | not DE   | not DE | not DE |
| EVM0019321 | LG10 | hypothetical protein VITISV_C | not DE   | not DE   | not DE | not DE |
| EVM0003943 | LG10 | hypothetical protein VITISV_C | not DE   | not DE   | not DE | not DE |
| EVM0013520 | LG10 | hypothetical protein VITISV_C | not DE   | not DE   | not DE | not DE |
| EVM0001928 | LG10 | integrase                     | not DE   | not DE   | not DE | not DE |
| EVM0017605 | LG10 | kinase family protein         | not DE   | not DE   | not DE | not DE |
| EVM0010224 | LG10 | leucine-rich repeat receptor  | not DE   | not DE   | not DE | not DE |
| EVM0008811 | LG10 | mads box protein, putative    | not DE   | not DE   | not DE | not DE |
| EVM0002595 | LG10 | metal ion binding protein, pu | not DE   | not DE   | not DE | not DE |
| EVM0002626 | LG10 | mitogen-activated protein kin | not DE   | not DE   | not DE | not DE |
| EVM0000588 | LG10 | multicopper oxidase, putative | not DE   | not DE   | not DE | not DE |
| EVM0005645 | LG10 | natural resistance-associated | not DE   | not DE   | not DE | not DE |
| EVM0007878 | LG10 | nucleic acid binding protein, | not DE   | not DE   | not DE | not DE |
| EVM0012000 | LG10 | orf774                        | not DE   | not DE   | not DE | not DE |
| EVM0020104 | LG10 | osmotin-like pathogenesis-rel | not DE   | not DE   | not DE | not DE |
| EVM0006243 | LG10 | osmotin-like protein I        | not DE   | not DE   | not DE | not DE |
| EVM0019201 | LG10 | osmotin-like protein I        | not DE   | not DE   | not DE | not DE |
| EVM0023381 | LG10 | oxygen evolving enhancer prot | -1.51466 | 0.006058 | not DE | not DE |
| EVM0006615 | LG10 | peroxidase 5                  | not DE   | not DE   | not DE | not DE |
| EVM0006244 | LG10 | phospholipase D delta         | not DE   | not DE   | not DE | not DE |
| EVM0005370 | LG10 | photosystem II protein K (chl | not DE   | not DE   | not DE | not DE |
| EVM0008857 | LG10 | plant ubiquilin, putative     | not DE   | not DE   | not DE | not DE |
| EVM0017643 | LG10 | polyprotein                   | not DE   | not DE   | not DE | not DE |
| EVM0013479 | LG10 | putative L-type lectin-domain | not DE   | not DE   | not DE | not DE |
| EVM0005105 | LG10 | putative mannitol dehydrogena | not DE   | not DE   | not DE | not DE |
| EVM0009613 | LG10 | putative mannitol dehydrogena | not DE   | not DE   | not DE | not DE |
| EVM0012183 | LG10 | putative mannitol dehydrogena | not DE   | not DE   | not DE | not DE |
| EVM0004061 | LG10 | putative serine/threonine-pro | not DE   | not DE   | not DE | not DE |
| EVM0012859 | LG10 | putative tripeptidyl-peptidas | not DE   | not DE   | not DE | not DE |
| EVM0006084 | LG10 | putative ubiquitin-conjugatin | not DE   | not DE   | not DE | not DE |
| EVM0023469 | LG10 | ribosomal protein L17         | not DE   | not DE   | not DE | not DE |
| EVM0005789 | LG10 | ribosomal protein L20         | not DE   | not DE   | not DE | not DE |
| EVM0000639 | LG10 | short vegetative phase 1      | not DE   | not DE   | not DE | not DE |
| EVM0013146 | LG10 | squalene epoxidase 1 protein  | not DE   | not DE   | not DE | not DE |
| EVM0016372 | LG10 | succinate dehydrogenase       | not DE   | not DE   | not DE | not DE |
| EVM0005224 | LG10 | succinate dehydrogenase, puta | not DE   | not DE   | not DE | not DE |
| EVM0013598 | LG10 | transcription factor APETALA2 | not DE   | not DE   | not DE | not DE |
| EVM0005220 | LG10 | trehalose-6-phosphate synthas | not DE   | not DE   | not DE | not DE |
| EVM0023888 | LG10 | ultraviolet-B receptor UVR8   | not DE   | not DE   | not DE | not DE |
| EVM0002651 | LG10 | unknown protein               | not DE   | not DE   | not DE | not DE |
| EVM0002932 | LG10 | unknown protein               | not DE   | not DE   | not DE | not DE |
| EVM0003028 | LG10 | unknown protein               | not DE   | not DE   | not DE | not DE |
| EVM0003683 | LG10 | unknown protein               | not DE   | not DE   | not DE | not DE |
| EVM0004208 | LG10 | unknown protein               | not DE   | not DE   | not DE | not DE |

|            |      |                                |          |          |        |        |
|------------|------|--------------------------------|----------|----------|--------|--------|
| EVM0005913 | LG10 | unknown protein                | not DE   | not DE   | not DE | not DE |
| EVM0005953 | LG10 | unknown protein                | not DE   | not DE   | not DE | not DE |
| EVM0005978 | LG10 | unknown protein                | not DE   | not DE   | not DE | not DE |
| EVM0008608 | LG10 | unknown protein                | not DE   | not DE   | not DE | not DE |
| EVM0009106 | LG10 | unknown protein                | not DE   | not DE   | not DE | not DE |
| EVM0010276 | LG10 | unknown protein                | not DE   | not DE   | not DE | not DE |
| EVM0010469 | LG10 | unknown protein                | not DE   | not DE   | not DE | not DE |
| EVM0010645 | LG10 | unknown protein                | not DE   | not DE   | not DE | not DE |
| EVM0010962 | LG10 | unknown protein                | not DE   | not DE   | not DE | not DE |
| EVM0012677 | LG10 | unknown protein                | not DE   | not DE   | not DE | not DE |
| EVM0014007 | LG10 | unknown protein                | not DE   | not DE   | not DE | not DE |
| EVM0014992 | LG10 | unknown protein                | not DE   | not DE   | not DE | not DE |
| EVM0016939 | LG10 | unknown protein                | not DE   | not DE   | not DE | not DE |
| EVM0018438 | LG10 | unknown protein                | not DE   | not DE   | not DE | not DE |
| EVM0021473 | LG10 | unknown protein                | not DE   | not DE   | not DE | not DE |
| EVM0021800 | LG10 | unknown protein                | not DE   | not DE   | not DE | not DE |
| EVM0023760 | LG10 | unknown protein                | not DE   | not DE   | not DE | not DE |
| EVM0023939 | LG10 | unknown protein                | not DE   | not DE   | not DE | not DE |
| EVM0004368 | LG10 | unnamed protein product        | not DE   | not DE   | not DE | not DE |
| EVM0005157 | LG10 | unnamed protein product        | not DE   | not DE   | not DE | not DE |
| EVM0005481 | LG10 | unnamed protein product        | not DE   | not DE   | not DE | not DE |
| EVM0005698 | LG10 | unnamed protein product        | not DE   | not DE   | not DE | not DE |
| EVM0007177 | LG10 | unnamed protein product        | not DE   | not DE   | not DE | not DE |
| EVM0007658 | LG10 | unnamed protein product        | not DE   | not DE   | not DE | not DE |
| EVM0008037 | LG10 | unnamed protein product        | not DE   | not DE   | not DE | not DE |
| EVM0008318 | LG10 | unnamed protein product        | not DE   | not DE   | not DE | not DE |
| EVM0008828 | LG10 | unnamed protein product        | not DE   | not DE   | not DE | not DE |
| EVM0013624 | LG10 | unnamed protein product        | not DE   | not DE   | not DE | not DE |
| EVM0013844 | LG10 | unnamed protein product        | not DE   | not DE   | not DE | not DE |
| EVM0015665 | LG10 | unnamed protein product        | not DE   | not DE   | not DE | not DE |
| EVM0017297 | LG10 | unnamed protein product        | not DE   | not DE   | not DE | not DE |
| EVM0017502 | LG10 | unnamed protein product        | 1.603644 | 0.039766 | not DE | not DE |
| EVM0018003 | LG10 | unnamed protein product        | not DE   | not DE   | not DE | not DE |
| EVM0018336 | LG10 | unnamed protein product        | not DE   | not DE   | not DE | not DE |
| EVM0020206 | LG10 | unnamed protein product        | not DE   | not DE   | not DE | not DE |
| EVM0021661 | LG10 | unnamed protein product        | not DE   | not DE   | not DE | not DE |
| EVM0024504 | LG10 | unnamed protein product        | not DE   | not DE   | not DE | not DE |
| EVM0024377 | LG10 | zeaxanthin epoxidase, putative | not DE   | not DE   | not DE | not DE |
| EVM0017001 | LG10 | zinc finger family protein     | not DE   | not DE   | not DE | not DE |
| EVM0021525 | LG10 | zinc finger protein, putative  | not DE   | not DE   | not DE | not DE |
| EVM0021374 | LG11 | 1-deoxy-D-xylulose 5-phosphate | not DE   | not DE   | not DE | not DE |
| EVM0006341 | LG11 | 14 kDa proline-rich protein    | not DE   | not DE   | not DE | not DE |
| EVM0011119 | LG11 | 14 kDa proline-rich protein    | not DE   | not DE   | not DE | not DE |
| EVM0000624 | LG11 | 17.3 kDa class I heat shock    | not DE   | not DE   | not DE | not DE |
| EVM0007162 | LG11 | 17.3 kDa class I heat shock    | not DE   | not DE   | not DE | not DE |
| EVM0013255 | LG11 | 17.3 kDa class I heat shock    | not DE   | not DE   | not DE | not DE |
| EVM0020389 | LG11 | 17.3 kDa class I heat shock    | not DE   | not DE   | not DE | not DE |
| EVM0017208 | LG11 | 18.1 kDa class I heat shock    | not DE   | not DE   | not DE | not DE |
| EVM0019518 | LG11 | 2-C-methyl-D-erythritol 2,4-   | not DE   | not DE   | not DE | not DE |
| EVM0017365 | LG11 | 21 kDa protein-like            | not DE   | not DE   | not DE | not DE |
| EVM0004306 | LG11 | 21 kDa seed protein-like iso   | not DE   | not DE   | not DE | not DE |
| EVM0006491 | LG11 | 21 kDa seed protein-like iso   | not DE   | not DE   | not DE | not DE |
| EVM0007214 | LG11 | 21 kDa seed protein-like iso   | not DE   | not DE   | not DE | not DE |
| EVM0011999 | LG11 | 21 kDa seed protein-like iso   | not DE   | not DE   | not DE | not DE |



|            |      |                              |          |          |          |         |
|------------|------|------------------------------|----------|----------|----------|---------|
| EVM0014066 | LG11 | 21 kDa seed protein-like iso | not DE   | not DE   | not DE   | not DE  |
| EVM0014648 | LG11 | 21 kDa seed protein-like iso | not DE   | not DE   | not DE   | not DE  |
| EVM0021842 | LG11 | 21 kDa seed protein-like iso | not DE   | not DE   | not DE   | not DE  |
| EVM0003796 | LG11 | 3-isopropylmalate dehydratas | not DE   | not DE   | not DE   | not DE  |
| EVM0018287 | LG11 | 3-oxoacyl-[acyl-carrier-prot | -4.5855  | 0.000712 | not DE   | not DE  |
| EVM0012044 | LG11 | 30S ribosomal protein 2, chl | not DE   | not DE   | not DE   | not DE  |
| EVM0001994 | LG11 | 4-coumarate--CoA ligase-like | not DE   | not DE   | not DE   | not DE  |
| EVM0003574 | LG11 | 4-coumarate--CoA ligase-like | not DE   | not DE   | not DE   | not DE  |
| EVM0009252 | LG11 | 4-coumarate--CoA ligase-like | not DE   | not DE   | not DE   | not DE  |
| EVM0022607 | LG11 | 40S ribosomal protein S20-2  | not DE   | not DE   | not DE   | not DE  |
| EVM0017091 | LG11 | 40S ribosomal protein S9-2   | not DE   | not DE   | not DE   | not DE  |
| EVM0006637 | LG11 | 50S ribosomal protein L12, c | not DE   | not DE   | not DE   | not DE  |
| EVM0009440 | LG11 | 50S ribosomal protein L19-1, | not DE   | not DE   | not DE   | not DE  |
| EVM0004912 | LG11 | 50S ribosomal protein L19-1, | not DE   | not DE   | not DE   | not DE  |
| EVM0009134 | LG11 | 50S ribosomal protein L4, ch | not DE   | not DE   | not DE   | not DE  |
| EVM0009102 | LG11 | 6-phosphogluconate dehydroge | not DE   | not DE   | not DE   | not DE  |
| EVM0019055 | LG11 | 60S ribosomal protein L17-2  | not DE   | not DE   | not DE   | not DE  |
| EVM0007628 | LG11 | 60S ribosomal protein L27a-3 | not DE   | not DE   | not DE   | not DE  |
| EVM0023129 | LG11 | 60S ribosomal protein L27a-3 | not DE   | not DE   | not DE   | not DE  |
| EVM0012303 | LG11 | 60S ribosomal protein L34-li | not DE   | not DE   | not DE   | not DE  |
| EVM0019152 | LG11 | 60S ribosomal protein L9-lik | not DE   | not DE   | not DE   | not DE  |
| EVM0001057 | LG11 | ABC transporter A family mem | not DE   | not DE   | not DE   | not DE  |
| EVM0019349 | LG11 | ABC transporter A family mem | not DE   | not DE   | not DE   | not DE  |
| EVM0022966 | LG11 | ABC transporter A family mem | not DE   | not DE   | not DE   | not DE  |
| EVM0008022 | LG11 | ABC transporter B family mem | not DE   | not DE   | not DE   | not DE  |
| EVM0007708 | LG11 | ABC transporter G family mem | not DE   | not DE   | not DE   | not DE  |
| EVM0016235 | LG11 | ABC transporter G family mem | not DE   | not DE   | not DE   | not DE  |
| EVM0024294 | LG11 | ABC transporter G family mem | not DE   | not DE   | not DE   | not DE  |
| EVM0011067 | LG11 | AT-rich interactive domain-c | not DE   | not DE   | not DE   | not DE  |
| EVM0004763 | LG11 | ATP-dependent Clp protease p | not DE   | not DE   | not DE   | not DE  |
| EVM0004581 | LG11 | ATP-dependent zinc metallopr | not DE   | not DE   | not DE   | not DE  |
| EVM0013759 | LG11 | BTB/POZ domain-containing pr | not DE   | not DE   | not DE   | not DE  |
| EVM0002316 | LG11 | BTB/POZ domain-containing pr | not DE   | not DE   | not DE   | not DE  |
| EVM0018667 | LG11 | C2 and GRAM domain-containin | 2.444885 | 0.039808 | not DE   | not DE  |
| EVM0024125 | LG11 | CASP-like protein At2g36330- | not DE   | not DE   | not DE   | not DE  |
| EVM0008130 | LG11 | CDT1-like protein b-like     | 1.462947 | 0.000644 | not DE   | not DE  |
| EVM0013677 | LG11 | CMP-sialic acid transporter  | not DE   | not DE   | not DE   | not DE  |
| EVM0000593 | LG11 | COMM domain-containing prote | not DE   | not DE   | not DE   | not DE  |
| EVM0019144 | LG11 | COP9 signalosome complex sub | not DE   | not DE   | not DE   | not DE  |
| EVM0017608 | LG11 | DNA annealing helicase and e | 1.22742  | 0.039619 | not DE   | not DE  |
| EVM0007885 | LG11 | DNA polymerase epsilon subun | not DE   | not DE   | not DE   | not DE  |
| EVM0017391 | LG11 | DNA primase small subunit-li | not DE   | not DE   | not DE   | not DE  |
| EVM0012042 | LG11 | DNA-(apurinic or apyrimidini | not DE   | not DE   | not DE   | not DE  |
| EVM0009958 | LG11 | DNA-binding protein RHL1-lik | not DE   | not DE   | not DE   | not DE  |
| EVM0008005 | LG11 | DNA-directed RNA polymerase  | not DE   | not DE   | not DE   | not DE  |
| EVM0006402 | LG11 | Down syndrome critical regio | -1.96733 | 0.018488 | -1.56104 | 0.04007 |
| EVM0000497 | LG11 | E2F transcription factor-lik | not DE   | not DE   | not DE   | not DE  |
| EVM0013030 | LG11 | E3 ubiquitin-protein ligase  | not DE   | not DE   | not DE   | not DE  |
| EVM0022443 | LG11 | E3 ubiquitin-protein ligase  | not DE   | not DE   | not DE   | not DE  |
| EVM0020684 | LG11 | E3 ubiquitin-protein ligase  | not DE   | not DE   | not DE   | not DE  |
| EVM0016605 | LG11 | E3 ubiquitin-protein ligase  | not DE   | not DE   | not DE   | not DE  |
| EVM0012493 | LG11 | F-box protein At5g49610-like | not DE   | not DE   | not DE   | not DE  |
| EVM0018150 | LG11 | F-box protein At5g49610-like | not DE   | not DE   | not DE   | not DE  |
| EVM0013113 | LG11 | F-box protein PP2-A12-like   | not DE   | not DE   | not DE   | not DE  |

|            |      |                              |          |          |          |         |
|------------|------|------------------------------|----------|----------|----------|---------|
| EVM0003831 | LG11 | F-box/kelch-repeat protein A | not DE   | not DE   | not DE   | not DE  |
| EVM0008305 | LG11 | FAM10 family protein At4g226 | -1.79606 | 0.000415 | -1.8224  | #####   |
| EVM0008497 | LG11 | FAS-associated factor 2-B-li | not DE   | not DE   | not DE   | not DE  |
| EVM0020994 | LG11 | FAS-associated factor 2-B-li | not DE   | not DE   | not DE   | not DE  |
| EVM0021904 | LG11 | FAS-associated factor 2-B-li | not DE   | not DE   | not DE   | not DE  |
| EVM0004107 | LG11 | FKBP12-interacting protein c | not DE   | not DE   | not DE   | not DE  |
| EVM0004689 | LG11 | G-type lectin S-receptor-lik | not DE   | not DE   | not DE   | not DE  |
| EVM0011889 | LG11 | G-type lectin S-receptor-lik | not DE   | not DE   | not DE   | not DE  |
| EVM0011038 | LG11 | GDSL esterase/lipase Atlg584 | not DE   | not DE   | not DE   | not DE  |
| EVM0006565 | LG11 | GDSL esterase/lipase At4g109 | not DE   | not DE   | not DE   | not DE  |
| EVM0006331 | LG11 | GEM-like protein 4           | not DE   | not DE   | not DE   | not DE  |
| EVM0008326 | LG11 | GMP synthase                 | 1.641917 | 1.55E-16 | not DE   | not DE  |
| EVM0009897 | LG11 | HIPL1 protein-like           | not DE   | not DE   | not DE   | not DE  |
| EVM0010630 | LG11 | HIPL1 protein-like           | not DE   | not DE   | not DE   | not DE  |
| EVM0024021 | LG11 | LOB domain-containing protei | 5.120232 | 0.00064  | not DE   | not DE  |
| EVM0017936 | LG11 | LOW QUALITY PROTEIN: unchara | not DE   | not DE   | not DE   | not DE  |
| EVM0021147 | LG11 | LOW QUALITY PROTEIN: unchara | not DE   | not DE   | not DE   | not DE  |
| EVM0021699 | LG11 | LRR receptor-like serine/thr | not DE   | not DE   | not DE   | not DE  |
| EVM0006763 | LG11 | LRR receptor-like serine/thr | not DE   | not DE   | not DE   | not DE  |
| EVM0005049 | LG11 | MATE efflux family protein L | not DE   | not DE   | not DE   | not DE  |
| EVM0023841 | LG11 | MORC family CW-type zinc fin | not DE   | not DE   | not DE   | not DE  |
| EVM0022614 | LG11 | N-alpha-acetyltransferase 40 | not DE   | not DE   | not DE   | not DE  |
| EVM0001791 | LG11 | N6-adenosine-methyltransfera | not DE   | not DE   | not DE   | not DE  |
| EVM0017390 | LG11 | N6-adenosine-methyltransfera | not DE   | not DE   | not DE   | not DE  |
| EVM0018072 | LG11 | NAC domain-containing protei | not DE   | not DE   | not DE   | not DE  |
| EVM0001368 | LG11 | NAC domain-containing protei | -1.29572 | 0.028288 | not DE   | not DE  |
| EVM0020654 | LG11 | NAC domain-containing protei | not DE   | not DE   | not DE   | not DE  |
| EVM0000061 | LG11 | NAC domain-containing protei | not DE   | not DE   | not DE   | not DE  |
| EVM0014036 | LG11 | NADH dehydrogenase           | not DE   | not DE   | not DE   | not DE  |
| EVM0024608 | LG11 | NAP1-related protein 2-like  | not DE   | not DE   | not DE   | not DE  |
| EVM0015693 | LG11 | NF-X1-type zinc finger prote | not DE   | not DE   | not DE   | not DE  |
| EVM0009736 | LG11 | PLASMODESMATA CALLOSE-BINDI  | not DE   | not DE   | not DE   | not DE  |
| EVM0006255 | LG11 | RING-H2 finger protein ATL63 | not DE   | not DE   | not DE   | not DE  |
| EVM0013341 | LG11 | RING-H2 finger protein ATL63 | not DE   | not DE   | not DE   | not DE  |
| EVM0023856 | LG11 | RNA polymerase II C-terminal | not DE   | not DE   | not DE   | not DE  |
| EVM0008121 | LG11 | RNA polymerase II transcript | not DE   | not DE   | not DE   | not DE  |
| EVM0020846 | LG11 | RPM1-interacting protein 4-l | not DE   | not DE   | not DE   | not DE  |
| EVM0003664 | LG11 | SEC14-like protein 5-like is | not DE   | not DE   | not DE   | not DE  |
| EVM0007321 | LG11 | SNAP25 homologous protein SN | not DE   | not DE   | not DE   | not DE  |
| EVM0020833 | LG11 | SNARE-interacting protein KE | not DE   | not DE   | not DE   | not DE  |
| EVM0005047 | LG11 | SPX domain-containing membra | not DE   | not DE   | not DE   | not DE  |
| EVM0001874 | LG11 | U3 small nucleolar ribonucle | not DE   | not DE   | -1.05603 | #####   |
| EVM0018394 | LG11 | UDP-galactose/UDP-glucose tr | not DE   | not DE   | not DE   | not DE  |
| EVM0007360 | LG11 | UDP-glycosyltransferase 71D1 | not DE   | not DE   | 1.88985  | 0.00914 |
| EVM0020614 | LG11 | UDP-glycosyltransferase 74B1 | not DE   | not DE   | not DE   | not DE  |
| EVM0014923 | LG11 | UDP-glycosyltransferase 87A1 | not DE   | not DE   | not DE   | not DE  |
| EVM0024094 | LG11 | UDP-glycosyltransferase 87A1 | not DE   | not DE   | not DE   | not DE  |
| EVM0019989 | LG11 | UDP-glycosyltransferase 87A2 | 1.192903 | 0.001628 | not DE   | not DE  |
| EVM0005109 | LG11 | UPF0160 protein MYG1, mitoch | not DE   | not DE   | not DE   | not DE  |
| EVM0022111 | LG11 | UPF0160 protein MYG1, mitoch | not DE   | not DE   | not DE   | not DE  |
| EVM0004603 | LG11 | UPF0426 protein Atlg28150, c | not DE   | not DE   | not DE   | not DE  |
| EVM0017096 | LG11 | V-type proton ATPase subunit | not DE   | not DE   | not DE   | not DE  |
| EVM0000331 | LG11 | abietadienol/abietadienal ox | not DE   | not DE   | not DE   | not DE  |
| EVM0003639 | LG11 | abietadienol/abietadienal ox | not DE   | not DE   | not DE   | not DE  |

|            |      |                               |          |          |          |         |
|------------|------|-------------------------------|----------|----------|----------|---------|
| EVM0023363 | LG11 | abscisic acid receptor PYL8-  | not DE   | not DE   | not DE   | not DE  |
| EVM0004586 | LG11 | actin-depolymerizing factor   | not DE   | not DE   | not DE   | not DE  |
| EVM0000460 | LG11 | actin-related protein 4-like  | not DE   | not DE   | not DE   | not DE  |
| EVM0010053 | LG11 | actin-related protein 4-like  | not DE   | not DE   | not DE   | not DE  |
| EVM0022578 | LG11 | activating signal cointegrat  | not DE   | not DE   | not DE   | not DE  |
| EVM0000111 | LG11 | agamous-like MADS-box protei  | not DE   | not DE   | not DE   | not DE  |
| EVM0022036 | LG11 | agmatine deiminase-like       | not DE   | not DE   | not DE   | not DE  |
| EVM0010533 | LG11 | aldehyde dehydrogenase famil  | not DE   | not DE   | not DE   | not DE  |
| EVM0016170 | LG11 | aldose 1-epimerase-like       | not DE   | not DE   | not DE   | not DE  |
| EVM0024603 | LG11 | alpha-1,4-glucan-protein syn  | not DE   | not DE   | not DE   | not DE  |
| EVM0001603 | LG11 | alpha-N-acetylglucosaminidas  | not DE   | not DE   | not DE   | not DE  |
| EVM0000461 | LG11 | anamorsin homolog             | not DE   | not DE   | not DE   | not DE  |
| EVM0010148 | LG11 | anaphase-promoting complex s  | not DE   | not DE   | not DE   | not DE  |
| EVM0016740 | LG11 | anaphase-promoting complex s  | not DE   | not DE   | not DE   | not DE  |
| EVM0011904 | LG11 | annexin D5-like               | not DE   | not DE   | not DE   | not DE  |
| EVM0004624 | LG11 | anthranilate phosphoribosylt  | not DE   | not DE   | not DE   | not DE  |
| EVM0020135 | LG11 | arabinogalactan peptide 20-l  | not DE   | not DE   | not DE   | not DE  |
| EVM0020429 | LG11 | armadillo repeat-containing   | not DE   | not DE   | not DE   | not DE  |
| EVM0000645 | LG11 | asparagine synthetase         | not DE   | not DE   | not DE   | not DE  |
| EVM0018838 | LG11 | asparagine synthetase         | not DE   | not DE   | not DE   | not DE  |
| EVM0012030 | LG11 | aspartic proteinase nepenthe  | not DE   | not DE   | not DE   | not DE  |
| EVM0021479 | LG11 | auxin-induced protein 5NG4-l  | not DE   | not DE   | not DE   | not DE  |
| EVM0007171 | LG11 | bax inhibitor 1-like          | -1.55936 | 0.004106 | not DE   | not DE  |
| EVM0024534 | LG11 | beta-adaptin-like protein B-  | not DE   | not DE   | not DE   | not DE  |
| EVM0000643 | LG11 | beta-glucosidase 44-like      | -1.39626 | 0.04491  | not DE   | not DE  |
| EVM0008248 | LG11 | bifunctional dTDP-4-dehydron  | not DE   | not DE   | not DE   | not DE  |
| EVM0016136 | LG11 | blue copper protein-like      | not DE   | not DE   | not DE   | not DE  |
| EVM0009226 | LG11 | brassinosteroid LRR receptor  | not DE   | not DE   | not DE   | not DE  |
| EVM0022299 | LG11 | calcineurin B-like protein 1  | not DE   | not DE   | 1.080612 | 0.01692 |
| EVM0001338 | LG11 | calcineurin B-like protein 7  | not DE   | not DE   | not DE   | not DE  |
| EVM0016573 | LG11 | calcineurin B-like protein 7  | not DE   | not DE   | not DE   | not DE  |
| EVM0012905 | LG11 | calcium-dependent protein ki  | not DE   | not DE   | not DE   | not DE  |
| EVM0019820 | LG11 | callose synthase 10-like      | not DE   | not DE   | not DE   | not DE  |
| EVM0003061 | LG11 | cannabidiolic acid synthase-  | not DE   | not DE   | not DE   | not DE  |
| EVM0017041 | LG11 | cannabidiolic acid synthase-  | 5.249604 | 0.006675 | not DE   | not DE  |
| EVM0016125 | LG11 | carbon catabolite repressor   | not DE   | not DE   | not DE   | not DE  |
| EVM0016852 | LG11 | casein kinase II subunit bet  | not DE   | not DE   | not DE   | not DE  |
| EVM0020563 | LG11 | cation/H(+) antiporter 18-li  | not DE   | not DE   | -1.10407 | 0.04944 |
| EVM0013541 | LG11 | cationic amino acid transport | not DE   | not DE   | not DE   | not DE  |
| EVM0004839 | LG11 | cationic amino acid transport | not DE   | not DE   | -1.09538 | 0.00033 |
| EVM0007773 | LG11 | cell division control protei  | not DE   | not DE   | not DE   | not DE  |
| EVM0012177 | LG11 | cellulose synthase-like prot  | not DE   | not DE   | not DE   | not DE  |
| EVM0004042 | LG11 | chaperone protein ClpB1       | not DE   | not DE   | not DE   | not DE  |
| EVM0022281 | LG11 | chaperone protein ClpB1       | not DE   | not DE   | not DE   | not DE  |
| EVM0021298 | LG11 | chlorophyll a-b binding prot  | -2.58188 | 0.000257 | not DE   | not DE  |
| EVM0019162 | LG11 | cleavage stimulation factor   | not DE   | not DE   | not DE   | not DE  |
| EVM0022424 | LG11 | coiled-coil domain-containin  | not DE   | not DE   | not DE   | not DE  |
| EVM0016948 | LG11 | cucumisin-like isoform X2     | not DE   | not DE   | not DE   | not DE  |
| EVM0022522 | LG11 | cyclic dof factor 3-like      | not DE   | not DE   | not DE   | not DE  |
| EVM0003938 | LG11 | cyclic nucleotide-gated ion   | not DE   | not DE   | not DE   | not DE  |
| EVM0004447 | LG11 | cyclic nucleotide-gated ion   | not DE   | not DE   | not DE   | not DE  |
| EVM0022279 | LG11 | cyclin-dependent kinase E-1-  | not DE   | not DE   | not DE   | not DE  |
| EVM0001899 | LG11 | cysteine-rich receptor-like   | not DE   | not DE   | not DE   | not DE  |
| EVM0008699 | LG11 | cytochrome P450 716B1-like    | not DE   | not DE   | not DE   | not DE  |

|            |      |                                |          |          |          |         |
|------------|------|--------------------------------|----------|----------|----------|---------|
| EVM0003357 | LG11 | cytochrome P450 71A1-like      | not DE   | not DE   | -1.81334 | #####   |
| EVM0012808 | LG11 | cytochrome P450 71A25          | not DE   | not DE   | -2.39718 | 0.0069  |
| EVM0003590 | LG11 | cytochrome P450 724B1-like     | not DE   | not DE   | not DE   | not DE  |
| EVM0017248 | LG11 | cytochrome P450 78A5           | not DE   | not DE   | not DE   | not DE  |
| EVM0000498 | LG11 | cytochrome P450 86A8-like      | -2.5617  | 0.042339 | not DE   | not DE  |
| EVM0002281 | LG11 | cytochrome P450 87A3-like      | not DE   | not DE   | not DE   | not DE  |
| EVM0001278 | LG11 | cytochrome P450 98A2           | not DE   | not DE   | not DE   | not DE  |
| EVM0005357 | LG11 | decapping nuclease DXO homolog | not DE   | not DE   | not DE   | not DE  |
| EVM0005339 | LG11 | delta-1-pyrroline-5-carboxyl   | not DE   | not DE   | not DE   | not DE  |
| EVM0008186 | LG11 | developmental protein SEPALL   | not DE   | not DE   | not DE   | not DE  |
| EVM0019141 | LG11 | dihydropyrimidine dehydrogen   | not DE   | not DE   | not DE   | not DE  |
| EVM0015878 | LG11 | dirigent protein 5-like        | not DE   | not DE   | not DE   | not DE  |
| EVM0012304 | LG11 | dnaJ homolog 1, mitochondria   | not DE   | not DE   | not DE   | not DE  |
| EVM0018807 | LG11 | dnaJ homolog subfamily B mem   | not DE   | not DE   | not DE   | not DE  |
| EVM0023613 | LG11 | dnaJ homolog subfamily C mem   | not DE   | not DE   | not DE   | not DE  |
| EVM0016110 | LG11 | dnaJ homolog subfamily C mem   | not DE   | not DE   | not DE   | not DE  |
| EVM0018750 | LG11 | dof zinc finger protein DOF2   | not DE   | not DE   | not DE   | not DE  |
| EVM0008772 | LG11 | dof zinc finger protein DOF5   | not DE   | not DE   | not DE   | not DE  |
| EVM0017006 | LG11 | elongation factor G, chlorop   | not DE   | not DE   | not DE   | not DE  |
| EVM0013839 | LG11 | enolase superfamily member D   | not DE   | not DE   | not DE   | not DE  |
| EVM0008896 | LG11 | ethylene-responsive transcri   | not DE   | not DE   | -1.45692 | 0.00806 |
| EVM0002147 | LG11 | ethylene-responsive transcri   | not DE   | not DE   | not DE   | not DE  |
| EVM0009029 | LG11 | ethylene-responsive transcri   | not DE   | not DE   | not DE   | not DE  |
| EVM0005604 | LG11 | ethylene-responsive transcri   | not DE   | not DE   | not DE   | not DE  |
| EVM0018353 | LG11 | exocyst complex component EX   | not DE   | not DE   | not DE   | not DE  |
| EVM0014235 | LG11 | expansin-A1 isoform X1         | not DE   | not DE   | not DE   | not DE  |
| EVM0015082 | LG11 | expansin-A7-like               | not DE   | not DE   | not DE   | not DE  |
| EVM0002728 | LG11 | expansin-like B1-like          | not DE   | not DE   | not DE   | not DE  |
| EVM0013470 | LG11 | filaggrin-like isoform X1      | not DE   | not DE   | -1.03034 | 0.00031 |
| EVM0015900 | LG11 | flavin-containing monooxygen   | not DE   | not DE   | not DE   | not DE  |
| EVM0021174 | LG11 | flavonol synthase/flavanone    | not DE   | not DE   | not DE   | not DE  |
| EVM0001257 | LG11 | galactinol--sucrose galactos   | not DE   | not DE   | not DE   | not DE  |
| EVM0019804 | LG11 | galactoside 2-alpha-L-fucosy   | not DE   | not DE   | not DE   | not DE  |
| EVM0010497 | LG11 | gamma-interferon-inducible l   | not DE   | not DE   | not DE   | not DE  |
| EVM0004998 | LG11 | geraniol 8-hydroxylase-like    | not DE   | not DE   | not DE   | not DE  |
| EVM0009017 | LG11 | geraniol 8-hydroxylase-like    | not DE   | not DE   | not DE   | not DE  |
| EVM0009220 | LG11 | geraniol 8-hydroxylase-like    | not DE   | not DE   | not DE   | not DE  |
| EVM0016054 | LG11 | geraniol 8-hydroxylase-like    | not DE   | not DE   | not DE   | not DE  |
| EVM0019325 | LG11 | geraniol 8-hydroxylase-like    | not DE   | not DE   | not DE   | not DE  |
| EVM0004433 | LG11 | geraniol 8-hydroxylase-like    | not DE   | not DE   | not DE   | not DE  |
| EVM0012372 | LG11 | geraniol 8-hydroxylase-like    | not DE   | not DE   | not DE   | not DE  |
| EVM0004216 | LG11 | geranylgeranyl diphosphate r   | -1.5704  | 0.009005 | not DE   | not DE  |
| EVM0006525 | LG11 | germin-like protein subfamil   | -1.24532 | 0.006897 | not DE   | not DE  |
| EVM0014385 | LG11 | glucan endo-1,3-beta-glucosi   | not DE   | not DE   | not DE   | not DE  |
| EVM0011046 | LG11 | glutamate decarboxylase 5-li   | not DE   | not DE   | not DE   | not DE  |
| EVM0009696 | LG11 | glutathione S-transferase U7   | not DE   | not DE   | not DE   | not DE  |
| EVM0011045 | LG11 | guard cell S-type anion chan   | not DE   | not DE   | not DE   | not DE  |
| EVM0013471 | LG11 | haloacid dehalogenase-like h   | not DE   | not DE   | not DE   | not DE  |
| EVM0021429 | LG11 | haze protective factor 1-like  | not DE   | not DE   | not DE   | not DE  |
| EVM0005725 | LG11 | heat shock protein 83-like     | -3.352   | 0.003707 | -3.37184 | #####   |
| EVM0020447 | LG11 | heme-binding protein 2-like    | not DE   | not DE   | not DE   | not DE  |
| EVM0003746 | LG11 | high mobility group B protei   | not DE   | not DE   | 2.344624 | 0.03789 |
| EVM0005686 | LG11 | histone acetyltransferase HA   | not DE   | not DE   | not DE   | not DE  |
| EVM0001219 | LG11 | histone deacetylase 15-like    | not DE   | not DE   | not DE   | not DE  |

|            |      |                              |          |          |          |         |
|------------|------|------------------------------|----------|----------|----------|---------|
| EVM0022298 | LG11 | histone deacetylase 5-like i | not DE   | not DE   | not DE   | not DE  |
| EVM0003056 | LG11 | histone deacetylase complex  | not DE   | not DE   | not DE   | not DE  |
| EVM0012672 | LG11 | histone-lysine N-methyltrans | not DE   | not DE   | not DE   | not DE  |
| EVM0005125 | LG11 | homeobox-leucine zipper prot | not DE   | not DE   | not DE   | not DE  |
| EVM0011066 | LG11 | hydroquinone glucosyltransfe | not DE   | not DE   | not DE   | not DE  |
| EVM0004231 | LG11 | isochorismate synthase, chl  | not DE   | not DE   | not DE   | not DE  |
| EVM0013053 | LG11 | jmjC domain-containing prote | not DE   | not DE   | not DE   | not DE  |
| EVM0024330 | LG11 | kelch domain-containing prot | not DE   | not DE   | not DE   | not DE  |
| EVM0007065 | LG11 | kinesin-4-like isoform X1    | -1.0224  | 0.009989 | not DE   | not DE  |
| EVM0002355 | LG11 | kinesin-like protein KIF18B- | not DE   | not DE   | not DE   | not DE  |
| EVM0005102 | LG11 | laccase-4                    | not DE   | not DE   | not DE   | not DE  |
| EVM0006901 | LG11 | light-mediated development p | not DE   | not DE   | not DE   | not DE  |
| EVM0004795 | LG11 | lignin-forming anionic perox | not DE   | not DE   | not DE   | not DE  |
| EVM0001634 | LG11 | lipid transfer-like protein  | not DE   | not DE   | not DE   | not DE  |
| EVM0009612 | LG11 | lon protease homolog 2, per  | not DE   | not DE   | not DE   | not DE  |
| EVM0014258 | LG11 | lysM domain receptor-like ki | not DE   | not DE   | not DE   | not DE  |
| EVM0001260 | LG11 | lysM domain receptor-like ki | not DE   | not DE   | not DE   | not DE  |
| EVM0006304 | LG11 | lysM domain receptor-like ki | not DE   | not DE   | not DE   | not DE  |
| EVM0019436 | LG11 | lysM domain receptor-like ki | not DE   | not DE   | not DE   | not DE  |
| EVM0021996 | LG11 | lysM domain receptor-like ki | not DE   | not DE   | not DE   | not DE  |
| EVM0003781 | LG11 | lysine-specific demethylase  | not DE   | not DE   | not DE   | not DE  |
| EVM0006067 | LG11 | lysine-specific demethylase  | not DE   | not DE   | not DE   | not DE  |
| EVM0019159 | LG11 | malate synthase, glyoxysomal | not DE   | not DE   | not DE   | not DE  |
| EVM0004790 | LG11 | maspardin-like isoform X1    | not DE   | not DE   | not DE   | not DE  |
| EVM0011110 | LG11 | mavicyanin-like              | not DE   | not DE   | not DE   | not DE  |
| EVM0011754 | LG11 | mavicyanin-like              | not DE   | not DE   | not DE   | not DE  |
| EVM0018480 | LG11 | mavicyanin-like              | not DE   | not DE   | not DE   | not DE  |
| EVM0021484 | LG11 | mavicyanin-like              | not DE   | not DE   | not DE   | not DE  |
| EVM0010926 | LG11 | mediator of RNA polymerase I | not DE   | not DE   | not DE   | not DE  |
| EVM0019018 | LG11 | mediator of RNA polymerase I | not DE   | not DE   | not DE   | not DE  |
| EVM0021150 | LG11 | mediator of RNA polymerase I | not DE   | not DE   | not DE   | not DE  |
| EVM0021163 | LG11 | mediator-associated protein  | not DE   | not DE   | not DE   | not DE  |
| EVM0010957 | LG11 | meiotic recombination protei | not DE   | not DE   | not DE   | not DE  |
| EVM0024461 | LG11 | membrane-bound O-acyltransfe | -1.09026 | 8.87E-06 | not DE   | not DE  |
| EVM0013966 | LG11 | metal-nicotianamine transpor | -1.25222 | 0.02994  | not DE   | not DE  |
| EVM0023618 | LG11 | metalloendoprotease 1-like   | not DE   | not DE   | not DE   | not DE  |
| EVM0023506 | LG11 | methylsterol monooxygenase I | not DE   | not DE   | not DE   | not DE  |
| EVM0017054 | LG11 | micronuclear linker histone  | not DE   | not DE   | not DE   | not DE  |
| EVM0012010 | LG11 | microtubule-associated prote | not DE   | not DE   | not DE   | not DE  |
| EVM0020212 | LG11 | microtubule-associated prote | not DE   | not DE   | not DE   | not DE  |
| EVM0020550 | LG11 | microtubule-associated prote | not DE   | not DE   | not DE   | not DE  |
| EVM0008080 | LG11 | mitochondrial 37S ribosomal  | not DE   | not DE   | not DE   | not DE  |
| EVM0007307 | LG11 | mitochondrial adenine nucle  | not DE   | not DE   | not DE   | not DE  |
| EVM0010088 | LG11 | mitochondrial import inner m | not DE   | not DE   | not DE   | not DE  |
| EVM0022208 | LG11 | mitogen-activated protein ki | not DE   | not DE   | -2.22329 | 0.00179 |
| EVM0010396 | LG11 | mitogen-activated protein ki | not DE   | not DE   | not DE   | not DE  |
| EVM0018588 | LG11 | mitogen-activated protein ki | not DE   | not DE   | not DE   | not DE  |
| EVM0019111 | LG11 | myb-related protein P-like   | not DE   | not DE   | not DE   | not DE  |
| EVM0017031 | LG11 | myosin-1-like isoform X1     | not DE   | not DE   | not DE   | not DE  |
| EVM0019088 | LG11 | myosin-11-like isoform X1    | not DE   | not DE   | not DE   | not DE  |
| EVM0000900 | LG11 | myosin-12                    | not DE   | not DE   | not DE   | not DE  |
| EVM0005061 | LG11 | myosin-2 heavy chain-like is | not DE   | not DE   | not DE   | not DE  |
| EVM0013863 | LG11 | myosin-2 heavy chain-like is | not DE   | not DE   | not DE   | not DE  |
| EVM0014399 | LG11 | myosin-2 heavy chain-like is | not DE   | not DE   | not DE   | not DE  |

|            |      |                               |          |          |          |         |
|------------|------|-------------------------------|----------|----------|----------|---------|
| EVM0018625 | LG11 | myosin-2 heavy chain-like is  | not DE   | not DE   | not DE   | not DE  |
| EVM0011499 | LG11 | non-specific lipid-transfer   | not DE   | not DE   | not DE   | not DE  |
| EVM0022809 | LG11 | nucleolar and coiled-body ph  | not DE   | not DE   | 2.338086 | 0.0165  |
| EVM0022053 | LG11 | nucleolar protein 56-like is  | 1.174542 | 0.031508 | not DE   | not DE  |
| EVM0003436 | LG11 | nudix hydrolase 14, chloropl  | not DE   | not DE   | not DE   | not DE  |
| EVM0015339 | LG11 | ocs element-binding factor l  | not DE   | not DE   | not DE   | not DE  |
| EVM0001987 | LG11 | oleosin 18.2 kDa-like         | not DE   | not DE   | not DE   | not DE  |
| EVM0009791 | LG11 | oligopeptide transporter 5-l  | not DE   | not DE   | not DE   | not DE  |
| EVM0011207 | LG11 | oligopeptide transporter 5-l  | not DE   | not DE   | not DE   | not DE  |
| EVM0011418 | LG11 | omega-3 fatty acid desaturas  | not DE   | not DE   | not DE   | not DE  |
| EVM0013602 | LG11 | omega-3 fatty acid desaturas  | not DE   | not DE   | not DE   | not DE  |
| EVM0020402 | LG11 | organic cation/carnitine tran | not DE   | not DE   | not DE   | not DE  |
| EVM0004241 | LG11 | organic cation/carnitine tran | not DE   | not DE   | not DE   | not DE  |
| EVM0001689 | LG11 | outer envelope protein 64, c  | not DE   | not DE   | not DE   | not DE  |
| EVM0017337 | LG11 | oxalate--CoA ligase-like      | not DE   | not DE   | not DE   | not DE  |
| EVM0011814 | LG11 | oxysterol-binding protein-re  | not DE   | not DE   | not DE   | not DE  |
| EVM0014802 | LG11 | pachytene checkpoint protein  | not DE   | not DE   | not DE   | not DE  |
| EVM0007942 | LG11 | palmitoyl-protein thioestera  | not DE   | not DE   | not DE   | not DE  |
| EVM0019047 | LG11 | pectinesterase 3-like         | not DE   | not DE   | not DE   | not DE  |
| EVM0005916 | LG11 | pentatricopeptide repeat-con  | 1.666906 | 0.005827 | not DE   | not DE  |
| EVM0023674 | LG11 | pentatricopeptide repeat-con  | not DE   | not DE   | not DE   | not DE  |
| EVM0006511 | LG11 | pentatricopeptide repeat-con  | not DE   | not DE   | not DE   | not DE  |
| EVM0001528 | LG11 | pentatricopeptide repeat-con  | 1.407054 | 0.018614 | not DE   | not DE  |
| EVM0012765 | LG11 | pentatricopeptide repeat-con  | not DE   | not DE   | not DE   | not DE  |
| EVM0024137 | LG11 | pentatricopeptide repeat-con  | 1.56934  | 1.61E-05 | not DE   | not DE  |
| EVM0006793 | LG11 | pentatricopeptide repeat-con  | 1.768913 | 0.041215 | not DE   | not DE  |
| EVM0013299 | LG11 | pentatricopeptide repeat-con  | 1.524175 | 0.012735 | not DE   | not DE  |
| EVM0021153 | LG11 | pentatricopeptide repeat-con  | not DE   | not DE   | not DE   | not DE  |
| EVM0014507 | LG11 | pentatricopeptide repeat-con  | not DE   | not DE   | not DE   | not DE  |
| EVM0020102 | LG11 | pentatricopeptide repeat-con  | not DE   | not DE   | not DE   | not DE  |
| EVM0003819 | LG11 | pentatricopeptide repeat-con  | not DE   | not DE   | not DE   | not DE  |
| EVM0000838 | LG11 | pentatricopeptide repeat-con  | not DE   | not DE   | not DE   | not DE  |
| EVM0012626 | LG11 | pentatricopeptide repeat-con  | not DE   | not DE   | not DE   | not DE  |
| EVM0006553 | LG11 | pentatricopeptide repeat-con  | not DE   | not DE   | not DE   | not DE  |
| EVM0008627 | LG11 | pentatricopeptide repeat-con  | not DE   | not DE   | not DE   | not DE  |
| EVM0015116 | LG11 | pentatricopeptide repeat-con  | not DE   | not DE   | not DE   | not DE  |
| EVM0002008 | LG11 | pentatricopeptide repeat-con  | not DE   | not DE   | not DE   | not DE  |
| EVM0013943 | LG11 | pentatricopeptide repeat-con  | 1.779882 | 0.040708 | not DE   | not DE  |
| EVM0017540 | LG11 | peptide methionine sulfoxide  | not DE   | not DE   | not DE   | not DE  |
| EVM0008197 | LG11 | peptidyl-prolyl cis-trans is  | not DE   | not DE   | not DE   | not DE  |
| EVM0018866 | LG11 | peptidyl-prolyl cis-trans is  | not DE   | not DE   | not DE   | not DE  |
| EVM0003305 | LG11 | peptidyl-prolyl cis-trans is  | not DE   | not DE   | not DE   | not DE  |
| EVM0022853 | LG11 | peptidyl-prolyl cis-trans is  | 1.204272 | 0.016801 | not DE   | not DE  |
| EVM0001599 | LG11 | peptidyl-tRNA hydrolase ICTl  | not DE   | not DE   | not DE   | not DE  |
| EVM0003130 | LG11 | peroxidase 41-like            | not DE   | not DE   | not DE   | not DE  |
| EVM0009305 | LG11 | peroxisomal membrane protein  | not DE   | not DE   | not DE   | not DE  |
| EVM0010605 | LG11 | pescadillo homolog            | not DE   | not DE   | not DE   | not DE  |
| EVM0004006 | LG11 | phosphatidylinositol glycan   | not DE   | not DE   | not DE   | not DE  |
| EVM0022320 | LG11 | phosphatidylinositol/phospha  | not DE   | not DE   | not DE   | not DE  |
| EVM0014454 | LG11 | phosphatidylserine decarboxy  | not DE   | not DE   | not DE   | not DE  |
| EVM0022227 | LG11 | phosphoinositide phospholipa  | not DE   | not DE   | 1.188171 | 0.03232 |
| EVM0019637 | LG11 | phospholipase A1-Ibeta2, chl  | not DE   | not DE   | not DE   | not DE  |
| EVM0023612 | LG11 | phosphopantothenoylcysteine   | not DE   | not DE   | not DE   | not DE  |
| EVM0018013 | LG11 | plasminogen activator inhibi  | not DE   | not DE   | not DE   | not DE  |

|            |      |                               |          |          |          |         |
|------------|------|-------------------------------|----------|----------|----------|---------|
| EVM0006644 | LG11 | plastid division protein CDP  | not DE   | not DE   | not DE   | not DE  |
| EVM0011712 | LG11 | pleckstrin homology domain-c  | not DE   | not DE   | not DE   | not DE  |
| EVM0018952 | LG11 | pollen-specific protein SF3-  | not DE   | not DE   | 2.283682 | 0.0025  |
| EVM0017891 | LG11 | poly(U)-specific endoribonuc  | not DE   | not DE   | not DE   | not DE  |
| EVM0002372 | LG11 | potassium transporter 2-like  | not DE   | not DE   | not DE   | not DE  |
| EVM0020751 | LG11 | presenilin-like protein At2g  | not DE   | not DE   | not DE   | not DE  |
| EVM0001330 | LG11 | presqualene diphosphate phos  | not DE   | not DE   | not DE   | not DE  |
| EVM0006932 | LG11 | presqualene diphosphate phos  | not DE   | not DE   | not DE   | not DE  |
| EVM0010108 | LG11 | primary amine oxidase-like    | not DE   | not DE   | not DE   | not DE  |
| EVM0016993 | LG11 | primary amine oxidase-like    | not DE   | not DE   | not DE   | not DE  |
| EVM0006175 | LG11 | probable 1-aminocyclopropane  | not DE   | not DE   | not DE   | not DE  |
| EVM0002976 | LG11 | probable ADP-ribosylation fa  | -1.14881 | 0.003789 | not DE   | not DE  |
| EVM0015508 | LG11 | probable ADP-ribosylation fa  | not DE   | not DE   | not DE   | not DE  |
| EVM0019030 | LG11 | probable ADP-ribosylation fa  | not DE   | not DE   | not DE   | not DE  |
| EVM0021450 | LG11 | probable ATP-dependent RNA h  | not DE   | not DE   | not DE   | not DE  |
| EVM0007651 | LG11 | probable E3 ubiquitin-protein | not DE   | not DE   | not DE   | not DE  |
| EVM0020715 | LG11 | probable LRR receptor-like s  | not DE   | not DE   | not DE   | not DE  |
| EVM0022411 | LG11 | probable LRR receptor-like s  | not DE   | not DE   | not DE   | not DE  |
| EVM0011952 | LG11 | probable LRR receptor-like s  | not DE   | not DE   | not DE   | not DE  |
| EVM0001562 | LG11 | probable N-acetyltransferase  | not DE   | not DE   | not DE   | not DE  |
| EVM0005742 | LG11 | probable N-acetyltransferase  | not DE   | not DE   | not DE   | not DE  |
| EVM0014646 | LG11 | probable acyl-activating enz  | not DE   | not DE   | not DE   | not DE  |
| EVM0018343 | LG11 | probable apyrase 7-like isof  | not DE   | not DE   | not DE   | not DE  |
| EVM0021229 | LG11 | probable aquaporin TIP2-2     | not DE   | not DE   | not DE   | not DE  |
| EVM0013258 | LG11 | probable aspartyl aminopepti  | not DE   | not DE   | not DE   | not DE  |
| EVM0003635 | LG11 | probable beta-1,3-galactosyl  | not DE   | not DE   | not DE   | not DE  |
| EVM0023732 | LG11 | probable boron transporter 2  | not DE   | not DE   | not DE   | not DE  |
| EVM0013271 | LG11 | probable calcium-binding pro  | not DE   | not DE   | not DE   | not DE  |
| EVM0007317 | LG11 | probable carboxylesterase 12  | not DE   | not DE   | not DE   | not DE  |
| EVM0020267 | LG11 | probable copper-transporting  | not DE   | not DE   | not DE   | not DE  |
| EVM0008929 | LG11 | probable galactinol--sucrose  | not DE   | not DE   | not DE   | not DE  |
| EVM0006351 | LG11 | probable galacturonosyltrans  | not DE   | not DE   | not DE   | not DE  |
| EVM0013625 | LG11 | probable glutathione peroxid  | not DE   | not DE   | not DE   | not DE  |
| EVM0002543 | LG11 | probable inactive receptor k  | not DE   | not DE   | not DE   | not DE  |
| EVM0009063 | LG11 | probable inactive receptor k  | not DE   | not DE   | not DE   | not DE  |
| EVM0011213 | LG11 | probable inactive receptor k  | not DE   | not DE   | not DE   | not DE  |
| EVM0020117 | LG11 | probable inactive receptor-l  | not DE   | not DE   | not DE   | not DE  |
| EVM0013910 | LG11 | probable leucine-rich repeat  | not DE   | not DE   | not DE   | not DE  |
| EVM0009936 | LG11 | probable membrane-associated  | not DE   | not DE   | not DE   | not DE  |
| EVM0014040 | LG11 | probable metal-nicotianamine  | not DE   | not DE   | -1.74236 | #####   |
| EVM0018972 | LG11 | probable metal-nicotianamine  | not DE   | not DE   | not DE   | not DE  |
| EVM0022259 | LG11 | probable peptide/nitrate tra  | not DE   | not DE   | not DE   | not DE  |
| EVM0001414 | LG11 | probable peptide/nitrate tra  | not DE   | not DE   | not DE   | not DE  |
| EVM0021753 | LG11 | probable phospholipid hydro   | not DE   | not DE   | not DE   | not DE  |
| EVM0002134 | LG11 | probable polygalacturonase n  | not DE   | not DE   | not DE   | not DE  |
| EVM0021513 | LG11 | probable protein phosphatase  | not DE   | not DE   | not DE   | not DE  |
| EVM0007208 | LG11 | probable protein phosphatase  | not DE   | not DE   | not DE   | not DE  |
| EVM0008414 | LG11 | probable protein phosphatase  | 5.037914 | 4.18E-13 | not DE   | not DE  |
| EVM0003818 | LG11 | probable receptor-like prote  | not DE   | not DE   | not DE   | not DE  |
| EVM0014445 | LG11 | probable receptor-like prote  | not DE   | not DE   | not DE   | not DE  |
| EVM0016033 | LG11 | probable receptor-like prote  | not DE   | not DE   | not DE   | not DE  |
| EVM0007988 | LG11 | probable receptor-like prote  | not DE   | not DE   | 1.265859 | 0.00543 |
| EVM0019083 | LG11 | probable serine/threonine-pr  | not DE   | not DE   | not DE   | not DE  |
| EVM0004312 | LG11 | probable serine/threonine-pr  | -2.46194 | 0.015752 | not DE   | not DE  |

|            |      |                               |          |          |          |         |
|------------|------|-------------------------------|----------|----------|----------|---------|
| EVM0004453 | LG11 | probable serine/threonine-pro | not DE   | not DE   | not DE   | not DE  |
| EVM0023165 | LG11 | probable succinyl-CoA ligase  | not DE   | not DE   | not DE   | not DE  |
| EVM0004787 | LG11 | prostaglandin E synthase 2-l  | not DE   | not DE   | not DE   | not DE  |
| EVM0007185 | LG11 | protease Do-like 9-like isof  | not DE   | not DE   | not DE   | not DE  |
| EVM0017581 | LG11 | protease Do-like 9-like isof  | not DE   | not DE   | not DE   | not DE  |
| EVM0002311 | LG11 | protein ABIL2-like            | not DE   | not DE   | not DE   | not DE  |
| EVM0002848 | LG11 | protein ASPARTIC PROTEASE IN  | not DE   | not DE   | not DE   | not DE  |
| EVM0003871 | LG11 | protein ASPARTIC PROTEASE IN  | not DE   | not DE   | not DE   | not DE  |
| EVM0016772 | LG11 | protein BEARSKIN1-like        | -4.07879 | 8.77E-06 | -3.2012  | #####   |
| EVM0005417 | LG11 | protein CHUP1, chloroplastid  | not DE   | not DE   | not DE   | not DE  |
| EVM0014683 | LG11 | protein CHUP1, chloroplastid  | not DE   | not DE   | not DE   | not DE  |
| EVM0020058 | LG11 | protein COBRA-like            | not DE   | not DE   | not DE   | not DE  |
| EVM0020420 | LG11 | protein COBRA-like            | not DE   | not DE   | not DE   | not DE  |
| EVM0007318 | LG11 | protein DEHYDRATION-INDUCED   | not DE   | not DE   | not DE   | not DE  |
| EVM0006526 | LG11 | protein DENND6A-like isoform  | not DE   | not DE   | not DE   | not DE  |
| EVM0002226 | LG11 | protein HOTHEAD-like isoform  | -2.44918 | 0.003946 | not DE   | not DE  |
| EVM0018808 | LG11 | protein IQ-DOMAIN 14-like     | 2.188551 | 4.98E-05 | 1.169435 | 0.00311 |
| EVM0021003 | LG11 | protein LONGIFOLIA 1-like     | not DE   | not DE   | not DE   | not DE  |
| EVM0015231 | LG11 | protein LURP-one-related 11-  | not DE   | not DE   | not DE   | not DE  |
| EVM0006638 | LG11 | protein LURP-one-related 17-  | 8.635851 | 9.15E-06 | not DE   | not DE  |
| EVM0007067 | LG11 | protein MODIFIER OF SNC1 1-l  | not DE   | not DE   | not DE   | not DE  |
| EVM0015046 | LG11 | protein NRDE2 homolog         | not DE   | not DE   | not DE   | not DE  |
| EVM0018051 | LG11 | protein O-linked-mannose bet  | not DE   | not DE   | not DE   | not DE  |
| EVM0009533 | LG11 | protein O-linked-mannose bet  | not DE   | not DE   | not DE   | not DE  |
| EVM0022173 | LG11 | protein PLANT CADMIUM RESIST  | not DE   | not DE   | not DE   | not DE  |
| EVM0015397 | LG11 | protein PXR1                  | not DE   | not DE   | not DE   | not DE  |
| EVM0007918 | LG11 | protein RKD1-like             | not DE   | not DE   | not DE   | not DE  |
| EVM0010826 | LG11 | protein ROS1-like isoform Xl  | not DE   | not DE   | not DE   | not DE  |
| EVM0012708 | LG11 | protein SPA1-RELATED 2-like   | not DE   | not DE   | not DE   | not DE  |
| EVM0012379 | LG11 | protein STRUBBELIG-RECEPTOR   | not DE   | not DE   | not DE   | not DE  |
| EVM0013891 | LG11 | protein TIC 62, chloroplastid | -1.95882 | 0.010761 | not DE   | not DE  |
| EVM0010557 | LG11 | protein TPX2-like isoform Xl  | not DE   | not DE   | not DE   | not DE  |
| EVM0004896 | LG11 | protein WEAK CHLOROPLAST MOV  | not DE   | not DE   | 1.153171 | 0.01463 |
| EVM0008291 | LG11 | protein YABBY 4               | not DE   | not DE   | not DE   | not DE  |
| EVM0021042 | LG11 | protein YLS7-like             | not DE   | not DE   | not DE   | not DE  |
| EVM0023223 | LG11 | protein YLS7-like             | not DE   | not DE   | not DE   | not DE  |
| EVM0017859 | LG11 | protein YLS9-like             | not DE   | not DE   | 1.433466 | 0.01246 |
| EVM0017523 | LG11 | protein arginine N-methyltra  | not DE   | not DE   | not DE   | not DE  |
| EVM0004976 | LG11 | protein kinase 2B, chloropla  | not DE   | not DE   | not DE   | not DE  |
| EVM0011264 | LG11 | protein kinase 2B, chloropla  | not DE   | not DE   | not DE   | not DE  |
| EVM0003035 | LG11 | protein kish-like             | not DE   | not DE   | not DE   | not DE  |
| EVM0016276 | LG11 | protein-L-isoaspartate O-met  | not DE   | not DE   | not DE   | not DE  |
| EVM0003148 | LG11 | puromycin-sensitive aminopep  | not DE   | not DE   | not DE   | not DE  |
| EVM0008737 | LG11 | purple acid phosphatase 17-l  | not DE   | not DE   | 1.934391 | 0.02941 |
| EVM0007157 | LG11 | putative 3,4-dihydroxy-2-but  | not DE   | not DE   | not DE   | not DE  |
| EVM0001300 | LG11 | putative ATP-dependent helic  | not DE   | not DE   | not DE   | not DE  |
| EVM0001141 | LG11 | putative E3 ubiquitin-protein | not DE   | not DE   | not DE   | not DE  |
| EVM0006557 | LG11 | putative E3 ubiquitin-protein | not DE   | not DE   | not DE   | not DE  |
| EVM0016729 | LG11 | putative E3 ubiquitin-protein | not DE   | not DE   | not DE   | not DE  |
| EVM0014053 | LG11 | putative L-type lectin-domai  | not DE   | not DE   | not DE   | not DE  |
| EVM0018379 | LG11 | putative L-type lectin-domai  | not DE   | not DE   | not DE   | not DE  |
| EVM0002669 | LG11 | putative RING-H2 finger prot  | not DE   | not DE   | not DE   | not DE  |
| EVM0005379 | LG11 | putative RING-H2 finger prot  | not DE   | not DE   | not DE   | not DE  |
| EVM0009168 | LG11 | putative RING-H2 finger prot  | not DE   | not DE   | not DE   | not DE  |



|            |      |                               |          |          |          |        |
|------------|------|-------------------------------|----------|----------|----------|--------|
| EVM0015264 | LG11 | putative RING-H2 finger prot  | not DE   | not DE   | not DE   | not DE |
| EVM0016557 | LG11 | putative RING-H2 finger prot  | not DE   | not DE   | not DE   | not DE |
| EVM0018276 | LG11 | putative RING-H2 finger prot  | not DE   | not DE   | not DE   | not DE |
| EVM0003700 | LG11 | putative RING-H2 finger prot  | not DE   | not DE   | not DE   | not DE |
| EVM0006833 | LG11 | putative RING-H2 finger prot  | not DE   | not DE   | not DE   | not DE |
| EVM0016824 | LG11 | putative RING-H2 finger prot  | not DE   | not DE   | not DE   | not DE |
| EVM0006983 | LG11 | putative RING-H2 finger prot  | not DE   | not DE   | not DE   | not DE |
| EVM0016204 | LG11 | putative U-box domain-contain | not DE   | not DE   | not DE   | not DE |
| EVM0018501 | LG11 | putative disease resistance   | not DE   | not DE   | not DE   | not DE |
| EVM0023698 | LG11 | putative exosome complex com  | not DE   | not DE   | not DE   | not DE |
| EVM0015380 | LG11 | putative glycerol-3-phosphat  | not DE   | not DE   | not DE   | not DE |
| EVM0024521 | LG11 | putative pentatricopeptide r  | not DE   | not DE   | not DE   | not DE |
| EVM0015040 | LG11 | putative pentatricopeptide r  | not DE   | not DE   | not DE   | not DE |
| EVM0020373 | LG11 | putative pentatricopeptide r  | not DE   | not DE   | not DE   | not DE |
| EVM0017055 | LG11 | putative ribonuclease H prot  | not DE   | not DE   | not DE   | not DE |
| EVM0017322 | LG11 | quinolinate synthase, chloro  | not DE   | not DE   | not DE   | not DE |
| EVM0005599 | LG11 | rab3 GTPase-activating prote  | not DE   | not DE   | not DE   | not DE |
| EVM0024145 | LG11 | radical S-adenosyl methionin  | not DE   | not DE   | not DE   | not DE |
| EVM0022661 | LG11 | ras-related protein RABA6a-l  | not DE   | not DE   | not DE   | not DE |
| EVM0000640 | LG11 | ras-related protein RABD2a-l  | not DE   | not DE   | not DE   | not DE |
| EVM0006292 | LG11 | ras-related protein Rab11C-l  | not DE   | not DE   | not DE   | not DE |
| EVM0023545 | LG11 | replication protein A 70 kDa  | not DE   | not DE   | not DE   | not DE |
| EVM0016386 | LG11 | reticulon-like protein B2-li  | not DE   | not DE   | not DE   | not DE |
| EVM0015455 | LG11 | rhodanese-like domain-contain | not DE   | not DE   | not DE   | not DE |
| EVM0022565 | LG11 | rhomboid protein 1, mitochon  | not DE   | not DE   | not DE   | not DE |
| EVM0001560 | LG11 | ribulose-phosphate 3-epimera  | not DE   | not DE   | not DE   | not DE |
| EVM0006619 | LG11 | scarecrow-like protein 14-li  | 2.005457 | 0.001134 | not DE   | not DE |
| EVM0011858 | LG11 | scarecrow-like protein 27-li  | not DE   | not DE   | not DE   | not DE |
| EVM0013538 | LG11 | scarecrow-like protein 27-li  | not DE   | not DE   | not DE   | not DE |
| EVM0009204 | LG11 | scarecrow-like protein 9-lik  | not DE   | not DE   | not DE   | not DE |
| EVM0000878 | LG11 | selT-like protein-like        | not DE   | not DE   | not DE   | not DE |
| EVM0011572 | LG11 | selT-like protein-like        | not DE   | not DE   | not DE   | not DE |
| EVM0000766 | LG11 | serine protease SPPA, chloro  | not DE   | not DE   | not DE   | not DE |
| EVM0013262 | LG11 | serine racemase-like isoform  | 2.007605 | 0.00811  | not DE   | not DE |
| EVM0005090 | LG11 | serine/arginine-rich splicing | not DE   | not DE   | not DE   | not DE |
| EVM0012780 | LG11 | serine/arginine-rich splicing | -1.85627 | 3.75E-07 | -1.30249 | #####  |
| EVM0000390 | LG11 | serine/threonine protein pho  | not DE   | not DE   | not DE   | not DE |
| EVM0013033 | LG11 | serine/threonine protein pho  | not DE   | not DE   | not DE   | not DE |
| EVM0001925 | LG11 | serine/threonine-protein kin  | not DE   | not DE   | not DE   | not DE |
| EVM0010771 | LG11 | serine/threonine-protein kin  | not DE   | not DE   | not DE   | not DE |
| EVM0023481 | LG11 | serine/threonine-protein kin  | not DE   | not DE   | not DE   | not DE |
| EVM0015087 | LG11 | serine/threonine-protein kin  | not DE   | not DE   | not DE   | not DE |
| EVM0000393 | LG11 | serine/threonine-protein kin  | not DE   | not DE   | not DE   | not DE |
| EVM0014349 | LG11 | serine/threonine-protein kin  | 1.432994 | 0.017188 | 1.276063 | #####  |
| EVM0001678 | LG11 | serine/threonine-protein kin  | not DE   | not DE   | not DE   | not DE |
| EVM0001888 | LG11 | serine/threonine-protein kin  | not DE   | not DE   | not DE   | not DE |
| EVM0020874 | LG11 | serine/threonine-protein pho  | not DE   | not DE   | not DE   | not DE |
| EVM0009507 | LG11 | serine/threonine-protein pho  | not DE   | not DE   | not DE   | not DE |
| EVM0020992 | LG11 | signaling mucin MSB2-like     | not DE   | not DE   | not DE   | not DE |
| EVM0022131 | LG11 | single-stranded DNA-binding   | not DE   | not DE   | not DE   | not DE |
| EVM0004828 | LG11 | small heat shock protein, ch  | -3.50318 | 2.42E-06 | -2.96403 | #####  |
| EVM0009756 | LG11 | snurportin-1-like isoform X1  | not DE   | not DE   | not DE   | not DE |
| EVM0016813 | LG11 | sperm-associated antigen 1-l  | not DE   | not DE   | not DE   | not DE |
| EVM0013993 | LG11 | sufE-like protein, chloropla  | not DE   | not DE   | not DE   | not DE |

|            |      |                                                 |          |          |          |         |
|------------|------|-------------------------------------------------|----------|----------|----------|---------|
| EVM0016471 | LG11 | sufE-like protein, chloroplast                  | not DE   | not DE   | not DE   | not DE  |
| EVM0004567 | LG11 | superkiller viralicidic actin                   | not DE   | not DE   | not DE   | not DE  |
| EVM0020932 | LG11 | superkiller viralicidic actin                   | not DE   | not DE   | not DE   | not DE  |
| EVM0019346 | LG11 | tRNA 2'-phosphotransferase                      | not DE   | not DE   | not DE   | not DE  |
| EVM0002979 | LG11 | tetraspanin-11-like                             | not DE   | not DE   | not DE   | not DE  |
| EVM0019177 | LG11 | tetraspanin-11-like                             | not DE   | not DE   | not DE   | not DE  |
| EVM0023259 | LG11 | thioredoxin-like 1-2, chloroplast               | not DE   | not DE   | not DE   | not DE  |
| EVM0004773 | LG11 | transcription factor LHW-like                   | not DE   | not DE   | not DE   | not DE  |
| EVM0003042 | LG11 | transcription factor MYB1R1-like                | not DE   | not DE   | not DE   | not DE  |
| EVM0009363 | LG11 | transcription factor MYB1R1-like                | not DE   | not DE   | not DE   | not DE  |
| EVM0007216 | LG11 | transcription factor MYB39-like                 | not DE   | not DE   | not DE   | not DE  |
| EVM0000940 | LG11 | transcription factor MYB98-like                 | not DE   | not DE   | not DE   | not DE  |
| EVM0007420 | LG11 | transcription factor PRE3-like                  | not DE   | not DE   | not DE   | not DE  |
| EVM0015115 | LG11 | transcription factor PRE3-like                  | not DE   | not DE   | not DE   | not DE  |
| EVM0018997 | LG11 | transcription factor TCP15                      | not DE   | not DE   | not DE   | not DE  |
| EVM0002132 | LG11 | transcription factor bHLH47-like                | not DE   | not DE   | not DE   | not DE  |
| EVM0014080 | LG11 | transcription factor bHLH79-like                | not DE   | not DE   | not DE   | not DE  |
| EVM0020384 | LG11 | transcription initiation factor                 | not DE   | not DE   | 1.815185 | 0.04626 |
| EVM0020636 | LG11 | transcription initiation factor                 | not DE   | not DE   | not DE   | not DE  |
| EVM0003719 | LG11 | transcription initiation factor                 | not DE   | not DE   | not DE   | not DE  |
| EVM0001507 | LG11 | translation initiation factor                   | not DE   | not DE   | 1.20751  | 0.00021 |
| EVM0013420 | LG11 | transportin-3-like isoform X1                   | not DE   | not DE   | not DE   | not DE  |
| EVM0007750 | LG11 | trehalase-like isoform X2                       | not DE   | not DE   | not DE   | not DE  |
| EVM0023171 | LG11 | trehalase-like isoform X2                       | not DE   | not DE   | not DE   | not DE  |
| EVM0011456 | LG11 | triose phosphate/phosphate translocator         | not DE   | not DE   | not DE   | not DE  |
| EVM0022374 | LG11 | triosephosphate isomerase, chloroplast          | not DE   | not DE   | not DE   | not DE  |
| EVM0006200 | LG11 | tropinone reductase homolog                     | not DE   | not DE   | 2.154428 | #####   |
| EVM0004467 | LG11 | tropinone reductase homolog                     | not DE   | not DE   | not DE   | not DE  |
| EVM0008411 | LG11 | tropinone reductase homolog                     | 7.747381 | 0.009514 | not DE   | not DE  |
| EVM0014867 | LG11 | tropinone reductase homolog                     | not DE   | not DE   | not DE   | not DE  |
| EVM0017112 | LG11 | tropinone reductase homolog                     | not DE   | not DE   | not DE   | not DE  |
| EVM0019229 | LG11 | tropinone reductase homolog                     | not DE   | not DE   | not DE   | not DE  |
| EVM0003431 | LG11 | tropinone reductase homolog                     | not DE   | not DE   | not DE   | not DE  |
| EVM0013830 | LG11 | tropomyosin-like isoform X1                     | not DE   | not DE   | not DE   | not DE  |
| EVM0007427 | LG11 | tubulin beta chain                              | not DE   | not DE   | not DE   | not DE  |
| EVM0014242 | LG11 | ubiquitin-activating enzyme                     | not DE   | not DE   | not DE   | not DE  |
| EVM0006384 | LG11 | ubiquitin-conjugating enzyme                    | not DE   | not DE   | not DE   | not DE  |
| EVM0013466 | LG11 | uncharacterized aarF domain                     | not DE   | not DE   | not DE   | not DE  |
| EVM0017965 | LG11 | uncharacterized endoplasmic reticulum chaperone | not DE   | not DE   | not DE   | not DE  |
| EVM0016258 | LG11 | uncharacterized endoplasmic reticulum chaperone | not DE   | not DE   | not DE   | not DE  |
| EVM0020930 | LG11 | uncharacterized protein At1g16320               | not DE   | not DE   | not DE   | not DE  |
| EVM0010529 | LG11 | uncharacterized protein At4g16320               | not DE   | not DE   | not DE   | not DE  |
| EVM0020963 | LG11 | uncharacterized protein At5g16320               | not DE   | not DE   | not DE   | not DE  |
| EVM0018036 | LG11 | uncharacterized protein At5g16320               | not DE   | not DE   | not DE   | not DE  |
| EVM0020136 | LG11 | uncharacterized protein C24B01.1                | not DE   | not DE   | not DE   | not DE  |
| EVM0011414 | LG11 | uncharacterized protein DDB1                    | not DE   | not DE   | not DE   | not DE  |
| EVM0012111 | LG11 | uncharacterized protein LOC101928251            | -1.2207  | 0.034963 | not DE   | not DE  |
| EVM0017904 | LG11 | uncharacterized protein LOC101928251            | not DE   | not DE   | 1.434566 | 0.04416 |
| EVM0012585 | LG11 | uncharacterized protein LOC101928251            | not DE   | not DE   | not DE   | not DE  |
| EVM0013154 | LG11 | uncharacterized protein LOC101928251            | not DE   | not DE   | not DE   | not DE  |
| EVM0016721 | LG11 | uncharacterized protein LOC101928251            | not DE   | not DE   | not DE   | not DE  |
| EVM0021111 | LG11 | uncharacterized protein LOC101928251            | not DE   | not DE   | not DE   | not DE  |
| EVM0004587 | LG11 | uncharacterized protein LOC101928251            | not DE   | not DE   | 1.358737 | 0.00653 |
| EVM0013279 | LG11 | uncharacterized protein LOC101928251            | not DE   | not DE   | not DE   | not DE  |

|            |      |                              |          |          |          |         |
|------------|------|------------------------------|----------|----------|----------|---------|
| EVM0004697 | LG11 | uncharacterized protein LOC1 | not DE   | not DE   | not DE   | not DE  |
| EVM0004841 | LG11 | uncharacterized protein LOC1 | not DE   | not DE   | 1.023633 | 0.01049 |
| EVM0018426 | LG11 | uncharacterized protein LOC1 | 1.504169 | 5.02E-05 | not DE   | not DE  |
| EVM0008769 | LG11 | uncharacterized protein LOC1 | not DE   | not DE   | not DE   | not DE  |
| EVM0006543 | LG11 | uncharacterized protein LOC1 | not DE   | not DE   | not DE   | not DE  |
| EVM0014755 | LG11 | uncharacterized protein LOC1 | not DE   | not DE   | not DE   | not DE  |
| EVM0015461 | LG11 | uncharacterized protein LOC1 | not DE   | not DE   | not DE   | not DE  |
| EVM0006746 | LG11 | uncharacterized protein LOC1 | not DE   | not DE   | not DE   | not DE  |
| EVM0011788 | LG11 | uncharacterized protein LOC1 | not DE   | not DE   | not DE   | not DE  |
| EVM0006340 | LG11 | uncharacterized protein LOC1 | not DE   | not DE   | not DE   | not DE  |
| EVM0013807 | LG11 | uncharacterized protein LOC1 | not DE   | not DE   | not DE   | not DE  |
| EVM0022000 | LG11 | uncharacterized protein LOC1 | not DE   | not DE   | not DE   | not DE  |
| EVM0001143 | LG11 | uncharacterized protein LOC1 | not DE   | not DE   | not DE   | not DE  |
| EVM0021887 | LG11 | uncharacterized protein LOC1 | not DE   | not DE   | not DE   | not DE  |
| EVM0018794 | LG11 | uncharacterized protein LOC1 | not DE   | not DE   | not DE   | not DE  |
| EVM0007243 | LG11 | uncharacterized protein LOC1 | -2.20532 | 0.014771 | not DE   | not DE  |
| EVM0000658 | LG11 | uncharacterized protein LOC1 | not DE   | not DE   | not DE   | not DE  |
| EVM0016762 | LG11 | uncharacterized protein LOC1 | not DE   | not DE   | not DE   | not DE  |
| EVM0014434 | LG11 | uncharacterized protein LOC1 | 1.053717 | 0.000117 | not DE   | not DE  |
| EVM0003376 | LG11 | uncharacterized protein LOC1 | 1.121032 | 0.007585 | not DE   | not DE  |
| EVM0021955 | LG11 | uncharacterized protein LOC1 | not DE   | not DE   | not DE   | not DE  |
| EVM0010000 | LG11 | uncharacterized protein LOC1 | not DE   | not DE   | not DE   | not DE  |
| EVM0016550 | LG11 | uncharacterized protein LOC1 | not DE   | not DE   | not DE   | not DE  |
| EVM0005781 | LG11 | uncharacterized protein LOC1 | not DE   | not DE   | not DE   | not DE  |
| EVM0001907 | LG11 | uncharacterized protein LOC1 | not DE   | not DE   | not DE   | not DE  |
| EVM0014293 | LG11 | uncharacterized protein LOC1 | not DE   | not DE   | not DE   | not DE  |
| EVM0011135 | LG11 | uncharacterized protein LOC1 | not DE   | not DE   | not DE   | not DE  |
| EVM0007617 | LG11 | uncharacterized protein LOC1 | not DE   | not DE   | not DE   | not DE  |
| EVM0004403 | LG11 | uncharacterized protein LOC1 | not DE   | not DE   | not DE   | not DE  |
| EVM0011504 | LG11 | uncharacterized protein LOC1 | not DE   | not DE   | not DE   | not DE  |
| EVM0022062 | LG11 | uncharacterized protein LOC1 | not DE   | not DE   | not DE   | not DE  |
| EVM0006248 | LG11 | uncharacterized protein LOC1 | not DE   | not DE   | not DE   | not DE  |
| EVM0018213 | LG11 | uncharacterized protein LOC1 | not DE   | not DE   | not DE   | not DE  |
| EVM0010259 | LG11 | uncharacterized protein LOC1 | not DE   | not DE   | not DE   | not DE  |
| EVM0009837 | LG11 | uncharacterized protein LOC1 | not DE   | not DE   | not DE   | not DE  |
| EVM0000051 | LG11 | uncharacterized protein LOC1 | not DE   | not DE   | not DE   | not DE  |
| EVM0002725 | LG11 | uncharacterized protein LOC1 | not DE   | not DE   | not DE   | not DE  |
| EVM0009879 | LG11 | uncharacterized protein LOC1 | not DE   | not DE   | -2.04175 | #####   |
| EVM0011778 | LG11 | uncharacterized protein LOC1 | not DE   | not DE   | not DE   | not DE  |
| EVM0002490 | LG11 | uncharacterized protein LOC1 | not DE   | not DE   | not DE   | not DE  |
| EVM0015918 | LG11 | uncharacterized protein LOC1 | not DE   | not DE   | not DE   | not DE  |
| EVM0007315 | LG11 | uncharacterized protein LOC1 | not DE   | not DE   | not DE   | not DE  |
| EVM0018216 | LG11 | uncharacterized protein LOC1 | not DE   | not DE   | not DE   | not DE  |
| EVM0015179 | LG11 | uncharacterized protein LOC1 | not DE   | not DE   | not DE   | not DE  |
| EVM0010042 | LG11 | uncharacterized protein LOC1 | not DE   | not DE   | not DE   | not DE  |
| EVM0015185 | LG11 | uncharacterized protein LOC1 | not DE   | not DE   | not DE   | not DE  |
| EVM0000913 | LG11 | uncharacterized protein LOC1 | not DE   | not DE   | not DE   | not DE  |
| EVM0010742 | LG11 | uncharacterized protein LOC1 | not DE   | not DE   | not DE   | not DE  |
| EVM0006221 | LG11 | uncharacterized protein LOC1 | not DE   | not DE   | not DE   | not DE  |
| EVM0012985 | LG11 | uncharacterized protein LOC1 | not DE   | not DE   | not DE   | not DE  |
| EVM0003817 | LG11 | uncharacterized protein LOC1 | not DE   | not DE   | not DE   | not DE  |
| EVM0019065 | LG11 | uncharacterized protein LOC1 | not DE   | not DE   | not DE   | not DE  |
| EVM0013725 | LG11 | uncharacterized protein LOC1 | not DE   | not DE   | -1.10932 | #####   |
| EVM0012818 | LG11 | uncharacterized protein LOC1 | not DE   | not DE   | not DE   | not DE  |

|            |      |                              |        |        |          |         |
|------------|------|------------------------------|--------|--------|----------|---------|
| EVM0021704 | LG11 | uncharacterized protein LOC1 | not DE | not DE | not DE   | not DE  |
| EVM0010918 | LG11 | uncharacterized protein LOC1 | not DE | not DE | not DE   | not DE  |
| EVM0009834 | LG11 | uncharacterized protein LOC1 | not DE | not DE | not DE   | not DE  |
| EVM0011729 | LG11 | uncharacterized protein LOC1 | not DE | not DE | not DE   | not DE  |
| EVM0023865 | LG11 | uncharacterized protein LOC1 | not DE | not DE | not DE   | not DE  |
| EVM0015325 | LG11 | uncharacterized protein LOC1 | not DE | not DE | not DE   | not DE  |
| EVM0013573 | LG11 | uncharacterized protein LOC1 | not DE | not DE | not DE   | not DE  |
| EVM0002465 | LG11 | uncharacterized protein LOC1 | not DE | not DE | not DE   | not DE  |
| EVM0020608 | LG11 | uncharacterized protein LOC1 | not DE | not DE | not DE   | not DE  |
| EVM0007709 | LG11 | uncharacterized protein LOC1 | not DE | not DE | not DE   | not DE  |
| EVM0014607 | LG11 | uncharacterized protein LOC1 | not DE | not DE | not DE   | not DE  |
| EVM0023462 | LG11 | uncharacterized protein LOC1 | not DE | not DE | not DE   | not DE  |
| EVM0007669 | LG11 | uncharacterized protein LOC1 | not DE | not DE | -1.35143 | #####   |
| EVM0021149 | LG11 | uncharacterized protein LOC1 | not DE | not DE | not DE   | not DE  |
| EVM0017657 | LG11 | uncharacterized protein LOC1 | not DE | not DE | not DE   | not DE  |
| EVM0021911 | LG11 | uncharacterized protein LOC1 | not DE | not DE | not DE   | not DE  |
| EVM0020348 | LG11 | uncharacterized protein LOC1 | not DE | not DE | not DE   | not DE  |
| EVM0020272 | LG11 | uncharacterized protein LOC1 | not DE | not DE | not DE   | not DE  |
| EVM0013236 | LG11 | uncharacterized protein LOC1 | not DE | not DE | not DE   | not DE  |
| EVM0021667 | LG11 | uncharacterized protein LOC1 | not DE | not DE | not DE   | not DE  |
| EVM0021514 | LG11 | uncharacterized protein LOC1 | not DE | not DE | not DE   | not DE  |
| EVM0014690 | LG11 | uncharacterized protein LOC1 | not DE | not DE | not DE   | not DE  |
| EVM0002824 | LG11 | uncharacterized protein LOC1 | not DE | not DE | not DE   | not DE  |
| EVM0003555 | LG11 | uncharacterized protein LOC1 | not DE | not DE | not DE   | not DE  |
| EVM0015247 | LG11 | uncharacterized protein LOC1 | not DE | not DE | not DE   | not DE  |
| EVM0001854 | LG11 | uncharacterized protein LOC1 | not DE | not DE | not DE   | not DE  |
| EVM0008593 | LG11 | uncharacterized protein LOC1 | not DE | not DE | not DE   | not DE  |
| EVM0018661 | LG11 | uncharacterized protein LOC1 | not DE | not DE | not DE   | not DE  |
| EVM0023057 | LG11 | uncharacterized protein LOC1 | not DE | not DE | not DE   | not DE  |
| EVM0015084 | LG11 | uncharacterized protein LOC1 | not DE | not DE | not DE   | not DE  |
| EVM0002354 | LG11 | uncharacterized protein LOC1 | not DE | not DE | not DE   | not DE  |
| EVM0005407 | LG11 | uncharacterized protein LOC1 | not DE | not DE | not DE   | not DE  |
| EVM0016053 | LG11 | uncharacterized protein LOC1 | not DE | not DE | not DE   | not DE  |
| EVM0014216 | LG11 | uncharacterized protein LOC1 | not DE | not DE | not DE   | not DE  |
| EVM0022354 | LG11 | uncharacterized protein LOC1 | not DE | not DE | not DE   | not DE  |
| EVM0004985 | LG11 | uncharacterized protein LOC1 | not DE | not DE | not DE   | not DE  |
| EVM0000571 | LG11 | uncharacterized protein LOC1 | not DE | not DE | not DE   | not DE  |
| EVM0004280 | LG11 | uncharacterized protein LOC1 | not DE | not DE | not DE   | not DE  |
| EVM0008727 | LG11 | uncharacterized protein LOC1 | not DE | not DE | not DE   | not DE  |
| EVM0010662 | LG11 | uncharacterized protein LOC1 | not DE | not DE | not DE   | not DE  |
| EVM0021171 | LG11 | uncharacterized protein LOC1 | not DE | not DE | not DE   | not DE  |
| EVM0004941 | LG11 | uncharacterized protein LOC1 | not DE | not DE | not DE   | not DE  |
| EVM0014001 | LG11 | uncharacterized protein LOC1 | not DE | not DE | not DE   | not DE  |
| EVM0005134 | LG11 | uncharacterized protein LOC1 | not DE | not DE | not DE   | not DE  |
| EVM0020285 | LG11 | uncharacterized protein LOC1 | not DE | not DE | not DE   | not DE  |
| EVM0024022 | LG11 | uncharacterized protein LOC1 | not DE | not DE | not DE   | not DE  |
| EVM0013214 | LG11 | uncharacterized protein LOC1 | not DE | not DE | 1.044749 | #####   |
| EVM0004048 | LG11 | uncharacterized protein LOC1 | not DE | not DE | not DE   | not DE  |
| EVM0020363 | LG11 | uncharacterized protein LOC1 | not DE | not DE | not DE   | not DE  |
| EVM0005770 | LG11 | uncharacterized protein LOC1 | not DE | not DE | not DE   | not DE  |
| EVM0014394 | LG11 | uncharacterized protein LOC1 | not DE | not DE | not DE   | not DE  |
| EVM0002162 | LG11 | uncharacterized protein LOC1 | not DE | not DE | 1.096767 | 0.00471 |
| EVM0022470 | LG11 | uncharacterized protein LOC1 | not DE | not DE | not DE   | not DE  |
| EVM0018810 | LG11 | uncharacterized protein LOC1 | not DE | not DE | not DE   | not DE  |

|            |      |                              |          |          |          |         |
|------------|------|------------------------------|----------|----------|----------|---------|
| EVM0009093 | LG11 | uncharacterized protein LOC1 | not DE   | not DE   | not DE   | not DE  |
| EVM0005687 | LG11 | uncharacterized protein LOC1 | not DE   | not DE   | not DE   | not DE  |
| EVM0021938 | LG11 | uncharacterized protein LOC1 | not DE   | not DE   | not DE   | not DE  |
| EVM0001932 | LG11 | uncharacterized protein LOC1 | not DE   | not DE   | not DE   | not DE  |
| EVM0019006 | LG11 | uncharacterized protein LOC1 | not DE   | not DE   | not DE   | not DE  |
| EVM0016732 | LG11 | uncharacterized protein LOC1 | not DE   | not DE   | not DE   | not DE  |
| EVM0008465 | LG11 | uncharacterized protein LOC1 | 2.293185 | 4.86E-06 | not DE   | not DE  |
| EVM0007662 | LG11 | uncharacterized protein LOC1 | not DE   | not DE   | not DE   | not DE  |
| EVM0000407 | LG11 | uncharacterized protein LOC1 | not DE   | not DE   | not DE   | not DE  |
| EVM0015557 | LG11 | uncharacterized protein LOC1 | not DE   | not DE   | not DE   | not DE  |
| EVM0022002 | LG11 | uncharacterized protein LOC1 | not DE   | not DE   | not DE   | not DE  |
| EVM0011599 | LG11 | uncharacterized protein LOC1 | 1.190057 | 0.018702 | not DE   | not DE  |
| EVM0018511 | LG11 | uncharacterized protein LOC1 | not DE   | not DE   | not DE   | not DE  |
| EVM0012440 | LG11 | uncharacterized protein LOC1 | not DE   | not DE   | not DE   | not DE  |
| EVM0010690 | LG11 | uncharacterized protein LOC1 | not DE   | not DE   | not DE   | not DE  |
| EVM0022046 | LG11 | uncharacterized protein LOC1 | not DE   | not DE   | not DE   | not DE  |
| EVM0004316 | LG11 | uncharacterized protein LOC1 | -1.26538 | 0.009022 | not DE   | not DE  |
| EVM0008612 | LG11 | uncharacterized protein LOC1 | not DE   | not DE   | not DE   | not DE  |
| EVM0009203 | LG11 | uncharacterized protein LOC1 | not DE   | not DE   | not DE   | not DE  |
| EVM0015216 | LG11 | uncharacterized protein LOC1 | not DE   | not DE   | not DE   | not DE  |
| EVM0000304 | LG11 | uncharacterized protein LOC1 | not DE   | not DE   | not DE   | not DE  |
| EVM0020737 | LG11 | uncharacterized protein LOC1 | not DE   | not DE   | 1.540901 | 0.02137 |
| EVM0002488 | LG11 | uncharacterized protein LOC1 | not DE   | not DE   | not DE   | not DE  |
| EVM0015817 | LG11 | uncharacterized protein LOC1 | not DE   | not DE   | not DE   | not DE  |
| EVM0015340 | LG11 | uncharacterized protein LOC1 | 7.089949 | 2.70E-05 | not DE   | not DE  |
| EVM0015757 | LG11 | uncharacterized protein LOC1 | not DE   | not DE   | 1.050854 | 0.01809 |
| EVM0023490 | LG11 | uncharacterized protein LOC1 | not DE   | not DE   | not DE   | not DE  |
| EVM0004725 | LG11 | uncharacterized protein LOC1 | not DE   | not DE   | not DE   | not DE  |
| EVM0005812 | LG11 | uncharacterized protein LOC1 | not DE   | not DE   | not DE   | not DE  |
| EVM0014423 | LG11 | uncharacterized protein LOC1 | not DE   | not DE   | not DE   | not DE  |
| EVM0005360 | LG11 | uncharacterized protein LOC1 | not DE   | not DE   | not DE   | not DE  |
| EVM0003828 | LG11 | uncharacterized protein LOC1 | not DE   | not DE   | not DE   | not DE  |
| EVM0004419 | LG11 | uncharacterized protein LOC1 | not DE   | not DE   | not DE   | not DE  |
| EVM0009872 | LG11 | uncharacterized protein LOC1 | not DE   | not DE   | 2.089374 | #####   |
| EVM0008687 | LG11 | uncharacterized protein LOC1 | not DE   | not DE   | not DE   | not DE  |
| EVM0000118 | LG11 | uncharacterized protein LOC1 | not DE   | not DE   | not DE   | not DE  |
| EVM0016567 | LG11 | uncharacterized protein LOC1 | not DE   | not DE   | not DE   | not DE  |
| EVM0003789 | LG11 | uncharacterized protein LOC1 | not DE   | not DE   | not DE   | not DE  |
| EVM0006152 | LG11 | uncharacterized protein LOC1 | not DE   | not DE   | not DE   | not DE  |
| EVM0004904 | LG11 | uncharacterized protein LOC1 | not DE   | not DE   | not DE   | not DE  |
| EVM0011304 | LG11 | uncharacterized protein LOC1 | not DE   | not DE   | not DE   | not DE  |
| EVM0024589 | LG11 | uncharacterized protein LOC1 | not DE   | not DE   | not DE   | not DE  |
| EVM0021773 | LG11 | uncharacterized protein LOC1 | not DE   | not DE   | not DE   | not DE  |
| EVM0009706 | LG11 | uncharacterized protein LOC1 | not DE   | not DE   | not DE   | not DE  |
| EVM0003419 | LG11 | uncharacterized protein LOC1 | not DE   | not DE   | not DE   | not DE  |
| EVM0000336 | LG11 | uncharacterized protein LOC1 | not DE   | not DE   | not DE   | not DE  |
| EVM0023626 | LG11 | uncharacterized protein LOC1 | not DE   | not DE   | not DE   | not DE  |
| EVM0024369 | LG11 | ureidoglycine aminohydrolase | not DE   | not DE   | not DE   | not DE  |
| EVM0013449 | LG11 | uridine-cytidine kinase C-li | not DE   | not DE   | not DE   | not DE  |
| EVM0012210 | LG11 | vacuolar cation/proton excha | not DE   | not DE   | not DE   | not DE  |
| EVM0011643 | LG11 | vacuolar protein sorting-ass | not DE   | not DE   | not DE   | not DE  |
| EVM0020463 | LG11 | vacuolar protein sorting-ass | not DE   | not DE   | not DE   | not DE  |
| EVM0015567 | LG11 | vacuolar-processing enzyme-l | not DE   | not DE   | not DE   | not DE  |
| EVM0012456 | LG11 | vesicle transport v-SNARE 13 | not DE   | not DE   | not DE   | not DE  |

|            |      |                                |          |          |          |         |
|------------|------|--------------------------------|----------|----------|----------|---------|
| EVM0015818 | LG11 | vesicle-associated protein 2   | not DE   | not DE   | not DE   | not DE  |
| EVM0000154 | LG11 | villin-1-like                  | -1.37514 | 0.013964 | not DE   | not DE  |
| EVM0020603 | LG11 | zinc finger A20 and AN1 domain | not DE   | not DE   | not DE   | not DE  |
| EVM0000944 | LG11 | zinc finger CCCH domain-cont   | not DE   | not DE   | not DE   | not DE  |
| EVM0015851 | LG11 | zinc finger CCCH domain-cont   | not DE   | not DE   | not DE   | not DE  |
| EVM0009556 | LG11 | zinc finger CCCH domain-cont   | not DE   | not DE   | not DE   | not DE  |
| EVM0003595 | LG11 | zinc finger CCCH domain-cont   | not DE   | not DE   | -1.05573 | #####   |
| EVM0004555 | LG11 | zinc finger CCCH domain-cont   | not DE   | not DE   | not DE   | not DE  |
| EVM0011923 | LG11 | zinc finger CCCH domain-cont   | not DE   | not DE   | not DE   | not DE  |
| EVM0012309 | LG11 | zinc finger protein CONSTANS   | not DE   | not DE   | not DE   | not DE  |
| EVM0002017 | LG11 | zinc-finger homeodomain prot   | not DE   | not DE   | not DE   | not DE  |
| EVM0016614 | LG11 | 1-aminocyclopropane-1-carboxy  | not DE   | not DE   | not DE   | not DE  |
| EVM0013740 | LG11 | 14 kDa proline-rich protein D  | not DE   | not DE   | not DE   | not DE  |
| EVM0014858 | LG11 | 14 kDa proline-rich protein D  | not DE   | not DE   | not DE   | not DE  |
| EVM0013487 | LG11 | 16.6 kDa heat shock            | not DE   | not DE   | not DE   | not DE  |
| EVM0006448 | LG11 | 17.5 kd heat shock family pro  | -4.07605 | 4.17E-06 | -2.9194  | #####   |
| EVM0010646 | LG11 | 3-ketoacyl-acyl carrier prote  | not DE   | not DE   | not DE   | not DE  |
| EVM0016027 | LG11 | 30S ribosomal protein S15 (ch  | not DE   | not DE   | not DE   | not DE  |
| EVM0018261 | LG11 | 40S ribosomal protein S7       | not DE   | not DE   | not DE   | not DE  |
| EVM0014180 | LG11 | ADP-glucose pyrophosphorylase  | not DE   | not DE   | not DE   | not DE  |
| EVM0014711 | LG11 | APETALA1                       | not DE   | not DE   | not DE   | not DE  |
| EVM0002964 | LG11 | ATP binding microtubule motor  | not DE   | not DE   | not DE   | not DE  |
| EVM0014652 | LG11 | ATP synthase CF1 epsilon subu  | -2.45948 | 0.02625  | not DE   | not DE  |
| EVM0017991 | LG11 | ATP-binding cassette transport | not DE   | not DE   | not DE   | not DE  |
| EVM0013447 | LG11 | ATP-dependent caseinolytic pr  | not DE   | not DE   | not DE   | not DE  |
| EVM0011424 | LG11 | ATP-dependent helicase/nuclea  | not DE   | not DE   | not DE   | not DE  |
| EVM0018504 | LG11 | ATPase E1-E2 type family prot  | not DE   | not DE   | not DE   | not DE  |
| EVM0019844 | LG11 | ATPase E1-E2 type family prot  | not DE   | not DE   | not DE   | not DE  |
| EVM0016499 | LG11 | Adenine nucleotide alpha hydr  | not DE   | not DE   | not DE   | not DE  |
| EVM0008539 | LG11 | Adenine phosphoribosyl transf  | not DE   | not DE   | not DE   | not DE  |
| EVM0005782 | LG11 | Alpha-glucan phosphorylase, H  | 1.425546 | 0.003698 | 1.271315 | 0.00031 |
| EVM0020991 | LG11 | Alpha/beta-Hydrolases superfam | not DE   | not DE   | not DE   | not DE  |
| EVM0023213 | LG11 | Ammonium transporter 1 member  | not DE   | not DE   | 2.435769 | 0.00202 |
| EVM0009001 | LG11 | Ankyrin repeat and KH domain-  | not DE   | not DE   | not DE   | not DE  |
| EVM0006607 | LG11 | Ankyrin repeat family protein  | not DE   | not DE   | not DE   | not DE  |
| EVM0005759 | LG11 | Autophagy-related 8f -like pr  | not DE   | not DE   | not DE   | not DE  |
| EVM0014554 | LG11 | Autophagy-related 8f -like pr  | not DE   | not DE   | not DE   | not DE  |
| EVM0015664 | LG11 | Auxin efflux facilitator isof  | not DE   | not DE   | not DE   | not DE  |
| EVM0016891 | LG11 | Auxin-induced protein 5NG4, p  | not DE   | not DE   | not DE   | not DE  |
| EVM0023829 | LG11 | BCL-2-associated athanogene 1  | not DE   | not DE   | 1.596629 | 0.0022  |
| EVM0023868 | LG11 | BCL-2-associated athanogene 4  | not DE   | not DE   | not DE   | not DE  |
| EVM0010730 | LG11 | BR enhanced expression 1       | 2.300513 | 0.037412 | not DE   | not DE  |
| EVM0018646 | LG11 | Basic helix-loop-helix DNA-bi  | not DE   | not DE   | not DE   | not DE  |
| EVM0013758 | LG11 | Bidirectional sugar transport  | not DE   | not DE   | not DE   | not DE  |
| EVM0000897 | LG11 | Bifunctional inhibitor/lipid-  | not DE   | not DE   | not DE   | not DE  |
| EVM0014135 | LG11 | Blue copper protein precursor  | not DE   | not DE   | not DE   | not DE  |
| EVM0021645 | LG11 | BnaA08g22720D                  | not DE   | not DE   | not DE   | not DE  |
| EVM0022944 | LG11 | BnaA09g11420D                  | not DE   | not DE   | not DE   | not DE  |
| EVM0012969 | LG11 | BnaAnng20920D                  | not DE   | not DE   | 1.184608 | #####   |
| EVM0006720 | LG11 | BnaC04g40780D                  | not DE   | not DE   | not DE   | not DE  |
| EVM0018087 | LG11 | BnaC04g40780D                  | not DE   | not DE   | not DE   | not DE  |
| EVM0018093 | LG11 | C2H2-like zinc finger protein  | not DE   | not DE   | not DE   | not DE  |
| EVM0020377 | LG11 | C2H2-like zinc finger protein  | not DE   | not DE   | not DE   | not DE  |
| EVM0015622 | LG11 | CAAX amino terminal protease   | not DE   | not DE   | not DE   | not DE  |

|            |      |                               |          |          |          |        |
|------------|------|-------------------------------|----------|----------|----------|--------|
| EVM0002591 | LG11 | CBF/DREB-like transcription f | not DE   | not DE   | not DE   | not DE |
| EVM0002707 | LG11 | CBF/DREB-like transcription f | not DE   | not DE   | not DE   | not DE |
| EVM0005738 | LG11 | CBF/DREB-like transcription f | not DE   | not DE   | not DE   | not DE |
| EVM0005981 | LG11 | CBF/DREB-like transcription f | not DE   | not DE   | not DE   | not DE |
| EVM0017184 | LG11 | CBF/DREB-like transcription f | not DE   | not DE   | not DE   | not DE |
| EVM0021981 | LG11 | CCT motif family protein iso  | 2.40279  | 0.03259  | 2.68202  | #####  |
| EVM0019791 | LG11 | CLP protease proteolytic subu | not DE   | not DE   | not DE   | not DE |
| EVM0010855 | LG11 | CRINKLY4 related 3, putative  | not DE   | not DE   | not DE   | not DE |
| EVM0012411 | LG11 | Coiled-coil domain-containing | not DE   | not DE   | not DE   | not DE |
| EVM0019068 | LG11 | Complex I subunit NDUFS6 iso  | not DE   | not DE   | not DE   | not DE |
| EVM0016116 | LG11 | Cyclic nucleotide-gated chann | not DE   | not DE   | not DE   | not DE |
| EVM0023097 | LG11 | Cysteine proteinases superfam | not DE   | not DE   | not DE   | not DE |
| EVM0016399 | LG11 | Cytochrome P450               | not DE   | not DE   | not DE   | not DE |
| EVM0022806 | LG11 | Cytochrome P450               | not DE   | not DE   | not DE   | not DE |
| EVM0023590 | LG11 | Cytochrome P450               | not DE   | not DE   | not DE   | not DE |
| EVM0010909 | LG11 | Cytochrome P450 71A1          | not DE   | not DE   | not DE   | not DE |
| EVM0013367 | LG11 | Cytochrome P450 71A1          | not DE   | not DE   | not DE   | not DE |
| EVM0015059 | LG11 | Cytochrome P450 71A1          | not DE   | not DE   | not DE   | not DE |
| EVM0016330 | LG11 | Cytochrome P450 71A1          | not DE   | not DE   | not DE   | not DE |
| EVM0017291 | LG11 | Cytochrome P450 71A1          | not DE   | not DE   | not DE   | not DE |
| EVM0019319 | LG11 | Cytochrome P450 94A2          | not DE   | not DE   | not DE   | not DE |
| EVM0019179 | LG11 | Cytosolic enolase 3           | not DE   | not DE   | not DE   | not DE |
| EVM0013373 | LG11 | DNA binding protein, putative | not DE   | not DE   | not DE   | not DE |
| EVM0022543 | LG11 | DNA-binding family protein    | not DE   | not DE   | not DE   | not DE |
| EVM0006999 | LG11 | DUF674 family protein         | not DE   | not DE   | not DE   | not DE |
| EVM0023033 | LG11 | DWNN domain isoform 1         | not DE   | not DE   | not DE   | not DE |
| EVM0003737 | LG11 | Dehydrodolichyl diphosphate s | not DE   | not DE   | not DE   | not DE |
| EVM0017489 | LG11 | Dihydroorotase, mitochondrial | not DE   | not DE   | not DE   | not DE |
| EVM0021935 | LG11 | Dihydroorotase, mitochondrial | not DE   | not DE   | not DE   | not DE |
| EVM0017761 | LG11 | Disease resistance protein fa | not DE   | not DE   | not DE   | not DE |
| EVM0023012 | LG11 | Dof-type zinc finger DNA-bind | not DE   | not DE   | not DE   | not DE |
| EVM0006062 | LG11 | Dolichyl-diphosphooligosaccha | not DE   | not DE   | -1.24621 | #####  |
| EVM0016900 | LG11 | Duplicated homeodomain-like s | not DE   | not DE   | not DE   | not DE |
| EVM0008752 | LG11 | Dynamin-like family protein   | not DE   | not DE   | not DE   | not DE |
| EVM0024012 | LG11 | Elicitor-responsive protein,  | not DE   | not DE   | not DE   | not DE |
| EVM0019994 | LG11 | Elongator complex 3 -like pro | not DE   | not DE   | not DE   | not DE |
| EVM0011867 | LG11 | Endoglucanase                 | not DE   | not DE   | not DE   | not DE |
| EVM0015659 | LG11 | Error-prone DNA polymerase    | not DE   | not DE   | not DE   | not DE |
| EVM0005583 | LG11 | Exostosin family protein      | not DE   | not DE   | not DE   | not DE |
| EVM0017975 | LG11 | F-box family protein isoform  | not DE   | not DE   | not DE   | not DE |
| EVM0006360 | LG11 | FAD-binding Berberine family  | not DE   | not DE   | not DE   | not DE |
| EVM0020222 | LG11 | Flavin-binding monooxygenase  | not DE   | not DE   | not DE   | not DE |
| EVM0021867 | LG11 | G patch domain-containing 3   | not DE   | not DE   | not DE   | not DE |
| EVM0001833 | LG11 | GDSL-motif lipase/hydrolase f | not DE   | not DE   | not DE   | not DE |
| EVM0010917 | LG11 | GRAS family transcription fac | not DE   | not DE   | not DE   | not DE |
| EVM0001410 | LG11 | Gag-Pol                       | not DE   | not DE   | not DE   | not DE |
| EVM0001191 | LG11 | Galactose oxidase/kelch repea | not DE   | not DE   | not DE   | not DE |
| EVM0003082 | LG11 | Galactosyltransferase family  | -1.41308 | 0.000114 | not DE   | not DE |
| EVM0011575 | LG11 | Glutaredoxin family protein,  | not DE   | not DE   | not DE   | not DE |
| EVM0023409 | LG11 | Glycosyl hydrolase family pro | not DE   | not DE   | not DE   | not DE |
| EVM0004283 | LG11 | Growth-regulating factor 2    | not DE   | not DE   | not DE   | not DE |
| EVM0005409 | LG11 | H(+)-ATPase 11 isoform 1      | not DE   | not DE   | not DE   | not DE |
| EVM0011458 | LG11 | HCP-like superfamily protein  | not DE   | not DE   | not DE   | not DE |
| EVM0006954 | LG11 | HSP20-like chaperones superfa | -3.88097 | 8.09E-11 | -2.38088 | #####  |

|            |      |                                |          |          |          |         |
|------------|------|--------------------------------|----------|----------|----------|---------|
| EVM0009859 | LG11 | HSP20-like chaperones superfa  | -6.55966 | 1.59E-06 | -4.14    | 0.00012 |
| EVM0021002 | LG11 | HSP20-like chaperones superfa  | -5.90482 | 0.000403 | -3.79548 | #####   |
| EVM0008551 | LG11 | HXXXD-type acyl-transferase f  | not DE   | not DE   | not DE   | not DE  |
| EVM0011495 | LG11 | HXXXD-type acyl-transferase f  | not DE   | not DE   | not DE   | not DE  |
| EVM0020785 | LG11 | Heat shock cognate protein 70  | -6.09673 | 0.0005   | not DE   | not DE  |
| EVM0021498 | LG11 | Heat shock cognate protein 70  | -2.63335 | 0.002812 | -2.55011 | #####   |
| EVM0013215 | LG11 | Heat shock protein STI         | -1.6212  | 0.022527 | -2.52635 | 0.01311 |
| EVM0017727 | LG11 | Heavy metal transport/detoxif  | not DE   | not DE   | not DE   | not DE  |
| EVM0011163 | LG11 | Histone H3 K4-specific methyl  | not DE   | not DE   | not DE   | not DE  |
| EVM0000105 | LG11 | Homeobox prospero              | not DE   | not DE   | not DE   | not DE  |
| EVM0020015 | LG11 | Homeobox-leucine zipper prote  | not DE   | not DE   | not DE   | not DE  |
| EVM0013717 | LG11 | Homeodomain-like superfamily   | not DE   | not DE   | not DE   | not DE  |
| EVM0001878 | LG11 | Hydrolase, hydrolyzing O-glyc  | not DE   | not DE   | not DE   | not DE  |
| EVM0002135 | LG11 | Hydroxymethylglutaryl-CoA syn  | not DE   | not DE   | not DE   | not DE  |
| EVM0003202 | LG11 | Integrase-type DNA-binding su  | not DE   | not DE   | not DE   | not DE  |
| EVM0016535 | LG11 | Integrase-type DNA-binding su  | not DE   | not DE   | not DE   | not DE  |
| EVM0007683 | LG11 | Jasmonate-zim-domain protein   | not DE   | not DE   | not DE   | not DE  |
| EVM0010932 | LG11 | KNOTTED-like homeobox of 7     | 1.256019 | 0.002972 | not DE   | not DE  |
| EVM0000353 | LG11 | Ketose-bisphosphate aldolase   | not DE   | not DE   | -1.04788 | 0.03382 |
| EVM0013523 | LG11 | Kinase protein with tetratric  | not DE   | not DE   | not DE   | not DE  |
| EVM0016645 | LG11 | Kinase superfamily protein     | not DE   | not DE   | not DE   | not DE  |
| EVM0001628 | LG11 | Kunitz family trypsin and pro  | not DE   | not DE   | not DE   | not DE  |
| EVM0001764 | LG11 | LIGULELESS1 protein, putative  | not DE   | not DE   | not DE   | not DE  |
| EVM0022669 | LG11 | Laccase 1                      | not DE   | not DE   | not DE   | not DE  |
| EVM0021909 | LG11 | Late embryogenesis abundant h  | not DE   | not DE   | not DE   | not DE  |
| EVM0004738 | LG11 | Lateral organ boundaries doma  | not DE   | not DE   | not DE   | not DE  |
| EVM0016617 | LG11 | Lateral organ boundaries doma  | not DE   | not DE   | not DE   | not DE  |
| EVM0002739 | LG11 | Lateral root primordium prote  | not DE   | not DE   | not DE   | not DE  |
| EVM0015902 | LG11 | Leucine-rich repeat protein k  | not DE   | not DE   | not DE   | not DE  |
| EVM0002644 | LG11 | MATE efflux family protein, p  | not DE   | not DE   | not DE   | not DE  |
| EVM0017236 | LG11 | Major facilitator superfamily  | not DE   | not DE   | not DE   | not DE  |
| EVM0017556 | LG11 | Major facilitator superfamily  | not DE   | not DE   | not DE   | not DE  |
| EVM0010902 | LG11 | Major facilitator superfamily  | not DE   | not DE   | not DE   | not DE  |
| EVM0002704 | LG11 | Maternal effect embryo arrest  | 4.350176 | 1.52E-10 | 4.70422  | #####   |
| EVM0005644 | LG11 | Metallopeptidase M24 family p  | not DE   | not DE   | not DE   | not DE  |
| EVM0012788 | LG11 | Metallopeptidase M24 family p  | not DE   | not DE   | not DE   | not DE  |
| EVM0010808 | LG11 | Methylglutaconyl-CoA hydratase | not DE   | not DE   | not DE   | not DE  |
| EVM0014041 | LG11 | Mitochondrial import receptor  | not DE   | not DE   | 1.029277 | 0.00602 |
| EVM0019946 | LG11 | Multidrug and toxin extrusion  | not DE   | not DE   | not DE   | not DE  |
| EVM0024579 | LG11 | Multidrug resistance protein   | not DE   | not DE   | not DE   | not DE  |
| EVM0013661 | LG11 | Myb domain protein 0           | not DE   | not DE   | not DE   | not DE  |
| EVM0020849 | LG11 | Myb domain protein 42          | not DE   | not DE   | not DE   | not DE  |
| EVM0001991 | LG11 | Myb domain protein 86          | not DE   | not DE   | not DE   | not DE  |
| EVM0013599 | LG11 | Myb-related protein 306, puta  | 2.156931 | 0.037681 | not DE   | not DE  |
| EVM0017126 | LG11 | NAC domain protein, IPR003441  | not DE   | not DE   | not DE   | not DE  |
| EVM0005009 | LG11 | NAD(P)-binding Rossmann-fold   | not DE   | not DE   | not DE   | not DE  |
| EVM0011951 | LG11 | Neutral/alkaline non-lysosoma  | not DE   | not DE   | not DE   | not DE  |
| EVM0004098 | LG11 | Nonspecific lipid-transfer pr  | not DE   | not DE   | not DE   | not DE  |
| EVM0005858 | LG11 | Nonspecific lipid-transfer pr  | not DE   | not DE   | not DE   | not DE  |
| EVM0012066 | LG11 | Nonspecific lipid-transfer pr  | not DE   | not DE   | not DE   | not DE  |
| EVM0020724 | LG11 | Nonspecific lipid-transfer pr  | not DE   | not DE   | not DE   | not DE  |
| EVM0011242 | LG11 | Nucleotide binding, putative   | not DE   | not DE   | not DE   | not DE  |
| EVM0015441 | LG11 | Nucleotide-sugar transporter   | -1.13488 | 0.006762 | not DE   | not DE  |
| EVM0000574 | LG11 | OBF-binding protein 3, putati  | not DE   | not DE   | not DE   | not DE  |



|            |      |                                   |          |          |          |         |
|------------|------|-----------------------------------|----------|----------|----------|---------|
| EVM0009127 | LG11 | OSBP(oxysterol binding protein)   | not DE   | not DE   | not DE   | not DE  |
| EVM0007138 | LG11 | Octicosapeptide/Phox/Bemlp family | not DE   | not DE   | not DE   | not DE  |
| EVM0001583 | LG11 | Oligopeptide transporter 7        | not DE   | not DE   | not DE   | not DE  |
| EVM0012385 | LG11 | Oligopeptide transporter 7        | not DE   | not DE   | 3.594229 | 0.02506 |
| EVM0020132 | LG11 | Osmotin-like protein              | not DE   | not DE   | not DE   | not DE  |
| EVM0000949 | LG11 | P-loop containing nucleoside      | not DE   | not DE   | not DE   | not DE  |
| EVM0008215 | LG11 | PLC-like phosphodiesterases       | not DE   | not DE   | not DE   | not DE  |
| EVM0024620 | LG11 | POX family protein isoform 1      | not DE   | not DE   | not DE   | not DE  |
| EVM0015008 | LG11 | PPPDE thiol peptidase family      | not DE   | not DE   | not DE   | not DE  |
| EVM0021903 | LG11 | Pectate lyase family protein      | not DE   | not DE   | not DE   | not DE  |
| EVM0005990 | LG11 | Pectin lyase-like superfamily     | not DE   | not DE   | not DE   | not DE  |
| EVM0019195 | LG11 | Pectin lyase-like superfamily     | not DE   | not DE   | not DE   | not DE  |
| EVM0021225 | LG11 | Pectin lyase-like superfamily     | not DE   | not DE   | not DE   | not DE  |
| EVM0009757 | LG11 | Pectin lyase-like superfamily     | not DE   | not DE   | not DE   | not DE  |
| EVM0006346 | LG11 | Pentatricopeptide repeat super    | not DE   | not DE   | not DE   | not DE  |
| EVM0001737 | LG11 | Peptidyl-tRNA hydrolase family    | not DE   | not DE   | not DE   | not DE  |
| EVM0003358 | LG11 | Peroxin 19-2                      | not DE   | not DE   | 1.122733 | #####   |
| EVM0001716 | LG11 | Phosphatidate cytidyltransferase  | not DE   | not DE   | not DE   | not DE  |
| EVM0016837 | LG11 | Phosphoglycerate mutase family    | -1.35037 | 0.02758  | not DE   | not DE  |
| EVM0008816 | LG11 | Plant invertase/pectin methyl     | not DE   | not DE   | 1.205458 | 0.04483 |
| EVM0012471 | LG11 | Plant synaptotagmin isoform 1     | not DE   | not DE   | not DE   | not DE  |
| EVM0011172 | LG11 | Poly(A) polymerase 1 isoform      | not DE   | not DE   | not DE   | not DE  |
| EVM0022634 | LG11 | Porin/voltage-dependent anion     | not DE   | not DE   | not DE   | not DE  |
| EVM0009974 | LG11 | Proliferating cell nuclear ant    | not DE   | not DE   | not DE   | not DE  |
| EVM0015391 | LG11 | Protein CASP, putative            | not DE   | not DE   | not DE   | not DE  |
| EVM0003833 | LG11 | Pyridoxal phosphate-dependent     | not DE   | not DE   | not DE   | not DE  |
| EVM0005190 | LG11 | RAN BINDING protein 1             | not DE   | not DE   | not DE   | not DE  |
| EVM0019628 | LG11 | RAN BINDING protein 1             | not DE   | not DE   | not DE   | not DE  |
| EVM0005795 | LG11 | RING/U-box superfamily protein    | not DE   | not DE   | not DE   | not DE  |
| EVM0009432 | LG11 | RING/U-box superfamily protein    | not DE   | not DE   | not DE   | not DE  |
| EVM0019928 | LG11 | RING/U-box superfamily protein    | not DE   | not DE   | not DE   | not DE  |
| EVM0003203 | LG11 | RING/U-box superfamily protein    | not DE   | not DE   | not DE   | not DE  |
| EVM0011716 | LG11 | RNA binding-like protein          | not DE   | not DE   | not DE   | not DE  |
| EVM0005818 | LG11 | RNA-metabolising metallo-beta     | not DE   | not DE   | not DE   | not DE  |
| EVM0001810 | LG11 | Rab5-interacting family prote     | not DE   | not DE   | not DE   | not DE  |
| EVM0019853 | LG11 | RecName: Full=Beta-amyrin syn     | not DE   | not DE   | not DE   | not DE  |
| EVM0021199 | LG11 | RecName: Full=Cycloartenol sy     | 1.495843 | 0.021839 | not DE   | not DE  |
| EVM0023376 | LG11 | RecName: Full=Elongation fact     | not DE   | not DE   | not DE   | not DE  |
| EVM0000386 | LG11 | Respiratory burst oxidase, pu     | not DE   | not DE   | not DE   | not DE  |
| EVM0018975 | LG11 | Rhizopine catabolism protein      | not DE   | not DE   | not DE   | not DE  |
| EVM0009801 | LG11 | SBP family protein                | not DE   | not DE   | 1.263271 | 0.00835 |
| EVM0001013 | LG11 | SIN3-like 2, putative isoform     | not DE   | not DE   | not DE   | not DE  |
| EVM0013476 | LG11 | SPIRAL1-likel, putative isofo     | -1.08674 | 0.008571 | 1.09968  | #####   |
| EVM0016983 | LG11 | Serine/threonine-protein kin      | not DE   | not DE   | not DE   | not DE  |
| EVM0018934 | LG11 | Serine/threonine-protein phos     | not DE   | not DE   | not DE   | not DE  |
| EVM0012140 | LG11 | Spermidine synthase 1             | not DE   | not DE   | not DE   | not DE  |
| EVM0016280 | LG11 | Splicing factor PWI domain-co     | not DE   | not DE   | not DE   | not DE  |
| EVM0023038 | LG11 | Ssu72-like family protein iso     | not DE   | not DE   | not DE   | not DE  |
| EVM0003760 | LG11 | Stellacyanin, putative isoform    | not DE   | not DE   | not DE   | not DE  |
| EVM0011625 | LG11 | Stellacyanin, putative isoform    | not DE   | not DE   | not DE   | not DE  |
| EVM0002148 | LG11 | Sugar-insensitive 3 isoform 1     | not DE   | not DE   | not DE   | not DE  |
| EVM0015848 | LG11 | Surfeit locus 1 cytochrome c      | not DE   | not DE   | not DE   | not DE  |
| EVM0010693 | LG11 | Teosinte branched 1, putative     | not DE   | not DE   | not DE   | not DE  |
| EVM0002184 | LG11 | Tetratricopeptide repeat (TPR)    | not DE   | not DE   | not DE   | not DE  |

|            |      |                                |          |          |          |         |
|------------|------|--------------------------------|----------|----------|----------|---------|
| EVM0006122 | LG11 | Tetratricopeptide repeat super | 2.13903  | 0.031315 | not DE   | not DE  |
| EVM0024331 | LG11 | Tetratricopeptide repeat-like  | not DE   | not DE   | not DE   | not DE  |
| EVM0019079 | LG11 | Tetratricopeptide repeat-like  | not DE   | not DE   | not DE   | not DE  |
| EVM0001929 | LG11 | ThiaminC isoform 4             | not DE   | not DE   | 1.641704 | 0.01251 |
| EVM0016324 | LG11 | Thiamine pyrophosphate depend  | not DE   | not DE   | not DE   | not DE  |
| EVM0023973 | LG11 | Thiamine pyrophosphate depend  | not DE   | not DE   | not DE   | not DE  |
| EVM0013231 | LG11 | Translation elongation factor  | not DE   | not DE   | not DE   | not DE  |
| EVM0018912 | LG11 | Trehalose-phosphatase/synthas  | not DE   | not DE   | not DE   | not DE  |
| EVM0019532 | LG11 | Typical subtype, Leucine-rich  | not DE   | not DE   | not DE   | not DE  |
| EVM0000935 | LG11 | UDP-D-glucose/UDP-D-galactose  | not DE   | not DE   | not DE   | not DE  |
| EVM0007837 | LG11 | UDP-D-glucose/UDP-D-galactose  | not DE   | not DE   | not DE   | not DE  |
| EVM0010342 | LG11 | UDP-Glycosyltransferase super  | not DE   | not DE   | not DE   | not DE  |
| EVM0000016 | LG11 | UDP-glucuronosyltransferase,   | not DE   | not DE   | not DE   | not DE  |
| EVM0008236 | LG11 | Ubiquitin-conjugating enzyme   | not DE   | not DE   | not DE   | not DE  |
| EVM0015710 | LG11 | Ubiquitin-conjugating enzyme   | not DE   | not DE   | not DE   | not DE  |
| EVM0013302 | LG11 | Uncharacterized protein TCM_C  | not DE   | not DE   | not DE   | not DE  |
| EVM0010598 | LG11 | Uncharacterized protein TCM_C  | not DE   | not DE   | not DE   | not DE  |
| EVM0012421 | LG11 | Uncharacterized protein TCM_C  | not DE   | not DE   | not DE   | not DE  |
| EVM0021593 | LG11 | Uncharacterized protein TCM_C  | not DE   | not DE   | not DE   | not DE  |
| EVM0019997 | LG11 | Uncharacterized protein TCM_C  | not DE   | not DE   | not DE   | not DE  |
| EVM0017997 | LG11 | Uncharacterized protein TCM_C  | not DE   | not DE   | not DE   | not DE  |
| EVM0020191 | LG11 | Uncharacterized protein TCM_C  | not DE   | not DE   | not DE   | not DE  |
| EVM0000748 | LG11 | Uncharacterized protein TCM_C  | not DE   | not DE   | not DE   | not DE  |
| EVM0012936 | LG11 | Uncharacterized protein TCM_C  | not DE   | not DE   | not DE   | not DE  |
| EVM0005171 | LG11 | Uncharacterized protein TCM_C  | not DE   | not DE   | not DE   | not DE  |
| EVM0021828 | LG11 | Uncharacterized protein TCM_C  | not DE   | not DE   | not DE   | not DE  |
| EVM0015213 | LG11 | Uncharacterized protein TCM_C  | not DE   | not DE   | not DE   | not DE  |
| EVM0000717 | LG11 | Uncharacterized protein isofo  | not DE   | not DE   | not DE   | not DE  |
| EVM0007599 | LG11 | Uncharacterized protein isofo  | not DE   | not DE   | not DE   | not DE  |
| EVM0011648 | LG11 | Uncharacterized protein isofo  | not DE   | not DE   | not DE   | not DE  |
| EVM0012454 | LG11 | Uncharacterized protein isofo  | not DE   | not DE   | not DE   | not DE  |
| EVM0012690 | LG11 | Uncharacterized protein isofo  | not DE   | not DE   | not DE   | not DE  |
| EVM0021715 | LG11 | Uncharacterized protein isofo  | not DE   | not DE   | not DE   | not DE  |
| EVM0001954 | LG11 | Uncharacterized protein isofo  | not DE   | not DE   | not DE   | not DE  |
| EVM0016147 | LG11 | Uncharacterized protein isofo  | not DE   | not DE   | not DE   | not DE  |
| EVM0020621 | LG11 | Uncharacterized protein isofo  | not DE   | not DE   | not DE   | not DE  |
| EVM0018888 | LG11 | Undecaprenyl pyrophosphate syn | not DE   | not DE   | not DE   | not DE  |
| EVM0021398 | LG11 | Vesicle-associated protein 1-  | not DE   | not DE   | not DE   | not DE  |
| EVM0001030 | LG11 | Vignain                        | not DE   | not DE   | not DE   | not DE  |
| EVM0010266 | LG11 | WRKY DNA-binding protein 21,   | 3.689967 | 0.006323 | not DE   | not DE  |
| EVM0017381 | LG11 | WRKY DNA-binding protein 72,   | not DE   | not DE   | not DE   | not DE  |
| EVM0020818 | LG11 | WUSCHEL, putative isoform 2    | not DE   | not DE   | not DE   | not DE  |
| EVM0005027 | LG11 | X-ray induced transcript 1, p  | not DE   | not DE   | not DE   | not DE  |
| EVM0004609 | LG11 | Xanthine/uracil permease fami  | not DE   | not DE   | not DE   | not DE  |
| EVM0006033 | LG11 | Xanthine/uracil permease fami  | not DE   | not DE   | not DE   | not DE  |
| EVM0019423 | LG11 | Xeroderma pigmentosum complem  | not DE   | not DE   | not DE   | not DE  |
| EVM0002860 | LG11 | Zinc finger family protein, p  | not DE   | not DE   | not DE   | not DE  |
| EVM0009748 | LG11 | Zinc finger protein            | not DE   | not DE   | not DE   | not DE  |
| EVM0003497 | LG11 | Zinc finger protein-related i  | not DE   | not DE   | not DE   | not DE  |
| EVM0018616 | LG11 | acid beta-fructofuranosidase-  | not DE   | not DE   | -1.08785 | 0.02044 |
| EVM0013888 | LG11 | actin 4                        | not DE   | not DE   | not DE   | not DE  |
| EVM0020045 | LG11 | actin 4                        | not DE   | not DE   | not DE   | not DE  |
| EVM0008845 | LG11 | alcohol dehydrogenase family   | not DE   | not DE   | not DE   | not DE  |
| EVM0018662 | LG11 | alpha galactosidase            | not DE   | not DE   | not DE   | not DE  |

|            |      |                               |          |          |        |        |
|------------|------|-------------------------------|----------|----------|--------|--------|
| EVM0023387 | LG11 | alpha-galactosidase/alpha-n-a | not DE   | not DE   | not DE | not DE |
| EVM0018173 | LG11 | anthocyanidin synthase        | not DE   | not DE   | not DE | not DE |
| EVM0001078 | LG11 | beta-amylase                  | 3.457595 | 4.65E-07 | not DE | not DE |
| EVM0007388 | LG11 | beta-carotene hydroxylase     | not DE   | not DE   | not DE | not DE |
| EVM0023193 | LG11 | beta-tubulin                  | not DE   | not DE   | not DE | not DE |
| EVM0011027 | LG11 | beta-tubulin 16               | not DE   | not DE   | not DE | not DE |
| EVM0005092 | LG11 | betaine-aldehyde dehydrogenas | not DE   | not DE   | not DE | not DE |
| EVM0008630 | LG11 | calcineurin B-like protein 01 | not DE   | not DE   | not DE | not DE |
| EVM0006128 | LG11 | catalytic, putative           | not DE   | not DE   | not DE | not DE |
| EVM0023077 | LG11 | cinnamoyl-CoA reductase, puta | not DE   | not DE   | not DE | not DE |
| EVM0001362 | LG11 | conserved hypothetical protei | not DE   | not DE   | not DE | not DE |
| EVM0008475 | LG11 | conserved hypothetical protei | not DE   | not DE   | not DE | not DE |
| EVM0008889 | LG11 | conserved hypothetical protei | not DE   | not DE   | not DE | not DE |
| EVM0012830 | LG11 | conserved hypothetical protei | not DE   | not DE   | not DE | not DE |
| EVM0018821 | LG11 | conserved hypothetical protei | not DE   | not DE   | not DE | not DE |
| EVM0019591 | LG11 | conserved hypothetical protei | not DE   | not DE   | not DE | not DE |
| EVM0022435 | LG11 | conserved hypothetical protei | not DE   | not DE   | not DE | not DE |
| EVM0024630 | LG11 | conserved hypothetical protei | not DE   | not DE   | not DE | not DE |
| EVM0023415 | LG11 | copper/zinc-superoxide dismut | not DE   | not DE   | not DE | not DE |
| EVM0020409 | LG11 | early flowering 4             | not DE   | not DE   | not DE | not DE |
| EVM0014294 | LG11 | embryonic flower 2b-1         | not DE   | not DE   | not DE | not DE |
| EVM0009670 | LG11 | endo-glucanase 2 family prote | not DE   | not DE   | not DE | not DE |
| EVM0013137 | LG11 | ethylene receptor             | not DE   | not DE   | not DE | not DE |
| EVM0005023 | LG11 | expansin 1                    | not DE   | not DE   | not DE | not DE |
| EVM0002404 | LG11 | flavanone 3&apos;-hydroxylase | not DE   | not DE   | not DE | not DE |
| EVM0019077 | LG11 | flavanone 3&apos;-hydroxylase | not DE   | not DE   | not DE | not DE |
| EVM0011391 | LG11 | gamma-glutamylcysteine synthe | not DE   | not DE   | not DE | not DE |
| EVM0003546 | LG11 | glucanase                     | not DE   | not DE   | not DE | not DE |
| EVM0014905 | LG11 | glucanase                     | not DE   | not DE   | not DE | not DE |
| EVM0016761 | LG11 | glucanase                     | not DE   | not DE   | not DE | not DE |
| EVM0017164 | LG11 | glucanase                     | not DE   | not DE   | not DE | not DE |
| EVM0022410 | LG11 | homeobox protein knotted-1, p | not DE   | not DE   | not DE | not DE |
| EVM0018174 | LG11 | hydrolase, acting on ester bo | not DE   | not DE   | not DE | not DE |
| EVM0019148 | LG11 | hypersensitive-induced respon | not DE   | not DE   | not DE | not DE |
| EVM0007036 | LG11 | hypothetical protein (mitoch  | not DE   | not DE   | not DE | not DE |
| EVM0024574 | LG11 | hypothetical protein AALP_AA8 | not DE   | not DE   | not DE | not DE |
| EVM0014361 | LG11 | hypothetical protein AMTR_s00 | not DE   | not DE   | not DE | not DE |
| EVM0019043 | LG11 | hypothetical protein AMTR_s03 | not DE   | not DE   | not DE | not DE |
| EVM0023458 | LG11 | hypothetical protein CARUB_v1 | not DE   | not DE   | not DE | not DE |
| EVM0013486 | LG11 | hypothetical protein CICLE_v1 | not DE   | not DE   | not DE | not DE |
| EVM0007736 | LG11 | hypothetical protein CICLE_v1 | 1.114185 | 0.044879 | not DE | not DE |
| EVM0017218 | LG11 | hypothetical protein CICLE_v1 | not DE   | not DE   | not DE | not DE |
| EVM0001110 | LG11 | hypothetical protein CICLE_v1 | not DE   | not DE   | not DE | not DE |
| EVM0022794 | LG11 | hypothetical protein CICLE_v1 | not DE   | not DE   | not DE | not DE |
| EVM0002795 | LG11 | hypothetical protein CICLE_v1 | not DE   | not DE   | not DE | not DE |
| EVM0014574 | LG11 | hypothetical protein CICLE_v1 | not DE   | not DE   | not DE | not DE |
| EVM0019877 | LG11 | hypothetical protein CICLE_v1 | not DE   | not DE   | not DE | not DE |
| EVM0021392 | LG11 | hypothetical protein CICLE_v1 | not DE   | not DE   | not DE | not DE |
| EVM0005876 | LG11 | hypothetical protein CICLE_v1 | not DE   | not DE   | not DE | not DE |
| EVM0021261 | LG11 | hypothetical protein CICLE_v1 | not DE   | not DE   | not DE | not DE |
| EVM0011005 | LG11 | hypothetical protein CICLE_v1 | not DE   | not DE   | not DE | not DE |
| EVM0021619 | LG11 | hypothetical protein CICLE_v1 | not DE   | not DE   | not DE | not DE |
| EVM0016616 | LG11 | hypothetical protein CICLE_v1 | not DE   | not DE   | not DE | not DE |
| EVM0004102 | LG11 | hypothetical protein CICLE_v1 | not DE   | not DE   | not DE | not DE |

|            |      |                               |          |          |          |         |
|------------|------|-------------------------------|----------|----------|----------|---------|
| EVM0018799 | LG11 | hypothetical protein CICLE_v1 | not DE   | not DE   | not DE   | not DE  |
| EVM0021190 | LG11 | hypothetical protein CICLE_v1 | not DE   | not DE   | not DE   | not DE  |
| EVM0015725 | LG11 | hypothetical protein CICLE_v1 | not DE   | not DE   | not DE   | not DE  |
| EVM0020819 | LG11 | hypothetical protein CICLE_v1 | not DE   | not DE   | not DE   | not DE  |
| EVM0011698 | LG11 | hypothetical protein CICLE_v1 | not DE   | not DE   | not DE   | not DE  |
| EVM0007887 | LG11 | hypothetical protein CICLE_v1 | not DE   | not DE   | not DE   | not DE  |
| EVM0015226 | LG11 | hypothetical protein CICLE_v1 | not DE   | not DE   | not DE   | not DE  |
| EVM0004165 | LG11 | hypothetical protein CICLE_v1 | -1.42045 | 0.046798 | not DE   | not DE  |
| EVM0021098 | LG11 | hypothetical protein CICLE_v1 | not DE   | not DE   | not DE   | not DE  |
| EVM0015933 | LG11 | hypothetical protein CICLE_v1 | not DE   | not DE   | not DE   | not DE  |
| EVM0014594 | LG11 | hypothetical protein CICLE_v1 | not DE   | not DE   | not DE   | not DE  |
| EVM0011964 | LG11 | hypothetical protein CICLE_v1 | not DE   | not DE   | not DE   | not DE  |
| EVM0006001 | LG11 | hypothetical protein CICLE_v1 | not DE   | not DE   | not DE   | not DE  |
| EVM0011315 | LG11 | hypothetical protein CICLE_v1 | not DE   | not DE   | not DE   | not DE  |
| EVM0011681 | LG11 | hypothetical protein CICLE_v1 | not DE   | not DE   | not DE   | not DE  |
| EVM0009097 | LG11 | hypothetical protein CICLE_v1 | not DE   | not DE   | -1.11078 | 0.00081 |
| EVM0012995 | LG11 | hypothetical protein CICLE_v1 | not DE   | not DE   | not DE   | not DE  |
| EVM0008831 | LG11 | hypothetical protein CICLE_v1 | not DE   | not DE   | not DE   | not DE  |
| EVM0009755 | LG11 | hypothetical protein CICLE_v1 | not DE   | not DE   | -1.00371 | #####   |
| EVM0007299 | LG11 | hypothetical protein CICLE_v1 | not DE   | not DE   | not DE   | not DE  |
| EVM0000828 | LG11 | hypothetical protein CICLE_v1 | not DE   | not DE   | not DE   | not DE  |
| EVM0019113 | LG11 | hypothetical protein CICLE_v1 | not DE   | not DE   | -1.0738  | 0.00081 |
| EVM0008616 | LG11 | hypothetical protein CICLE_v1 | not DE   | not DE   | not DE   | not DE  |
| EVM0012728 | LG11 | hypothetical protein CICLE_v1 | not DE   | not DE   | not DE   | not DE  |
| EVM0002023 | LG11 | hypothetical protein CICLE_v1 | not DE   | not DE   | not DE   | not DE  |
| EVM0002952 | LG11 | hypothetical protein CICLE_v1 | not DE   | not DE   | not DE   | not DE  |
| EVM0004323 | LG11 | hypothetical protein CICLE_v1 | not DE   | not DE   | not DE   | not DE  |
| EVM0013460 | LG11 | hypothetical protein CICLE_v1 | not DE   | not DE   | not DE   | not DE  |
| EVM0013438 | LG11 | hypothetical protein CICLE_v1 | not DE   | not DE   | not DE   | not DE  |
| EVM0018250 | LG11 | hypothetical protein CICLE_v1 | not DE   | not DE   | not DE   | not DE  |
| EVM0009603 | LG11 | hypothetical protein CICLE_v1 | not DE   | not DE   | not DE   | not DE  |
| EVM0015304 | LG11 | hypothetical protein CICLE_v1 | 1.155926 | 0.008279 | not DE   | not DE  |
| EVM0006861 | LG11 | hypothetical protein CICLE_v1 | not DE   | not DE   | not DE   | not DE  |
| EVM0003411 | LG11 | hypothetical protein CICLE_v1 | not DE   | not DE   | not DE   | not DE  |
| EVM0024547 | LG11 | hypothetical protein CICLE_v1 | not DE   | not DE   | not DE   | not DE  |
| EVM0019061 | LG11 | hypothetical protein CICLE_v1 | not DE   | not DE   | not DE   | not DE  |
| EVM0003570 | LG11 | hypothetical protein CICLE_v1 | not DE   | not DE   | -1.12494 | 0.0316  |
| EVM0011440 | LG11 | hypothetical protein CICLE_v1 | not DE   | not DE   | not DE   | not DE  |
| EVM0018622 | LG11 | hypothetical protein CICLE_v1 | not DE   | not DE   | not DE   | not DE  |
| EVM0008447 | LG11 | hypothetical protein CICLE_v1 | not DE   | not DE   | not DE   | not DE  |
| EVM0007556 | LG11 | hypothetical protein CICLE_v1 | not DE   | not DE   | not DE   | not DE  |
| EVM0002717 | LG11 | hypothetical protein CICLE_v1 | not DE   | not DE   | not DE   | not DE  |
| EVM0000183 | LG11 | hypothetical protein CICLE_v1 | not DE   | not DE   | not DE   | not DE  |
| EVM0023741 | LG11 | hypothetical protein CICLE_v1 | 1.055244 | 0.03761  | not DE   | not DE  |
| EVM0015282 | LG11 | hypothetical protein CICLE_v1 | not DE   | not DE   | not DE   | not DE  |
| EVM0002066 | LG11 | hypothetical protein CICLE_v1 | not DE   | not DE   | -1.25305 | 0.0427  |
| EVM0022475 | LG11 | hypothetical protein CICLE_v1 | not DE   | not DE   | not DE   | not DE  |
| EVM0000831 | LG11 | hypothetical protein CICLE_v1 | not DE   | not DE   | not DE   | not DE  |
| EVM0009225 | LG11 | hypothetical protein CICLE_v1 | not DE   | not DE   | not DE   | not DE  |
| EVM0019810 | LG11 | hypothetical protein CICLE_v1 | not DE   | not DE   | not DE   | not DE  |
| EVM0016428 | LG11 | hypothetical protein CICLE_v1 | not DE   | not DE   | not DE   | not DE  |
| EVM0007444 | LG11 | hypothetical protein CICLE_v1 | not DE   | not DE   | not DE   | not DE  |
| EVM0002681 | LG11 | hypothetical protein CICLE_v1 | not DE   | not DE   | not DE   | not DE  |
| EVM0010484 | LG11 | hypothetical protein CICLE_v1 | not DE   | not DE   | not DE   | not DE  |

|            |      |                               |          |          |          |        |
|------------|------|-------------------------------|----------|----------|----------|--------|
| EVM0020038 | LG11 | hypothetical protein CICLE_v1 | not DE   | not DE   | not DE   | not DE |
| EVM0005997 | LG11 | hypothetical protein CICLE_v1 | not DE   | not DE   | not DE   | not DE |
| EVM0000614 | LG11 | hypothetical protein CICLE_v1 | not DE   | not DE   | not DE   | not DE |
| EVM0005582 | LG11 | hypothetical protein CICLE_v1 | not DE   | not DE   | not DE   | not DE |
| EVM0015097 | LG11 | hypothetical protein CICLE_v1 | not DE   | not DE   | not DE   | not DE |
| EVM0017830 | LG11 | hypothetical protein CICLE_v1 | not DE   | not DE   | not DE   | not DE |
| EVM0003644 | LG11 | hypothetical protein CICLE_v1 | not DE   | not DE   | not DE   | not DE |
| EVM0011539 | LG11 | hypothetical protein CICLE_v1 | not DE   | not DE   | not DE   | not DE |
| EVM0012899 | LG11 | hypothetical protein CICLE_v1 | 4.277048 | 0.000202 | not DE   | not DE |
| EVM0003946 | LG11 | hypothetical protein CICLE_v1 | not DE   | not DE   | not DE   | not DE |
| EVM0012168 | LG11 | hypothetical protein CICLE_v1 | 1.022774 | 0.04737  | not DE   | not DE |
| EVM0014366 | LG11 | hypothetical protein CICLE_v1 | not DE   | not DE   | not DE   | not DE |
| EVM0015438 | LG11 | hypothetical protein CICLE_v1 | not DE   | not DE   | not DE   | not DE |
| EVM0010831 | LG11 | hypothetical protein CICLE_v1 | not DE   | not DE   | not DE   | not DE |
| EVM0015705 | LG11 | hypothetical protein CICLE_v1 | not DE   | not DE   | not DE   | not DE |
| EVM0019379 | LG11 | hypothetical protein CICLE_v1 | not DE   | not DE   | not DE   | not DE |
| EVM0021732 | LG11 | hypothetical protein CICLE_v1 | not DE   | not DE   | not DE   | not DE |
| EVM0000752 | LG11 | hypothetical protein CICLE_v1 | not DE   | not DE   | not DE   | not DE |
| EVM0022925 | LG11 | hypothetical protein CICLE_v1 | not DE   | not DE   | not DE   | not DE |
| EVM0021370 | LG11 | hypothetical protein CICLE_v1 | not DE   | not DE   | -1.03396 | #####  |
| EVM0005922 | LG11 | hypothetical protein CICLE_v1 | not DE   | not DE   | not DE   | not DE |
| EVM0010454 | LG11 | hypothetical protein CICLE_v1 | not DE   | not DE   | not DE   | not DE |
| EVM0005488 | LG11 | hypothetical protein CICLE_v1 | not DE   | not DE   | not DE   | not DE |
| EVM0002391 | LG11 | hypothetical protein CICLE_v1 | not DE   | not DE   | not DE   | not DE |
| EVM0023256 | LG11 | hypothetical protein CICLE_v1 | not DE   | not DE   | not DE   | not DE |
| EVM0009626 | LG11 | hypothetical protein CICLE_v1 | not DE   | not DE   | not DE   | not DE |
| EVM0022716 | LG11 | hypothetical protein CICLE_v1 | 1.700508 | 7.42E-05 | not DE   | not DE |
| EVM0006468 | LG11 | hypothetical protein CICLE_v1 | not DE   | not DE   | not DE   | not DE |
| EVM0002235 | LG11 | hypothetical protein CICLE_v1 | not DE   | not DE   | not DE   | not DE |
| EVM0017445 | LG11 | hypothetical protein CICLE_v1 | not DE   | not DE   | not DE   | not DE |
| EVM0006350 | LG11 | hypothetical protein CICLE_v1 | not DE   | not DE   | not DE   | not DE |
| EVM0001806 | LG11 | hypothetical protein CICLE_v1 | not DE   | not DE   | not DE   | not DE |
| EVM0017311 | LG11 | hypothetical protein CICLE_v1 | not DE   | not DE   | not DE   | not DE |
| EVM0010294 | LG11 | hypothetical protein CICLE_v1 | not DE   | not DE   | not DE   | not DE |
| EVM0009684 | LG11 | hypothetical protein CICLE_v1 | not DE   | not DE   | not DE   | not DE |
| EVM0004554 | LG11 | hypothetical protein CICLE_v1 | not DE   | not DE   | not DE   | not DE |
| EVM0020002 | LG11 | hypothetical protein CICLE_v1 | not DE   | not DE   | not DE   | not DE |
| EVM0009657 | LG11 | hypothetical protein CICLE_v1 | not DE   | not DE   | not DE   | not DE |
| EVM0020793 | LG11 | hypothetical protein CICLE_v1 | not DE   | not DE   | not DE   | not DE |
| EVM0019244 | LG11 | hypothetical protein CICLE_v1 | not DE   | not DE   | not DE   | not DE |
| EVM0012797 | LG11 | hypothetical protein CICLE_v1 | not DE   | not DE   | not DE   | not DE |
| EVM0022518 | LG11 | hypothetical protein CICLE_v1 | not DE   | not DE   | not DE   | not DE |
| EVM0006634 | LG11 | hypothetical protein CICLE_v1 | not DE   | not DE   | not DE   | not DE |
| EVM0001575 | LG11 | hypothetical protein CICLE_v1 | not DE   | not DE   | not DE   | not DE |
| EVM0013345 | LG11 | hypothetical protein CICLE_v1 | not DE   | not DE   | not DE   | not DE |
| EVM0021960 | LG11 | hypothetical protein CICLE_v1 | not DE   | not DE   | not DE   | not DE |
| EVM0001793 | LG11 | hypothetical protein CICLE_v1 | not DE   | not DE   | not DE   | not DE |
| EVM0016899 | LG11 | hypothetical protein CICLE_v1 | not DE   | not DE   | not DE   | not DE |
| EVM0010211 | LG11 | hypothetical protein CICLE_v1 | not DE   | not DE   | not DE   | not DE |
| EVM0022022 | LG11 | hypothetical protein CICLE_v1 | not DE   | not DE   | not DE   | not DE |
| EVM0007058 | LG11 | hypothetical protein CICLE_v1 | not DE   | not DE   | not DE   | not DE |
| EVM0012494 | LG11 | hypothetical protein CICLE_v1 | not DE   | not DE   | not DE   | not DE |
| EVM0005313 | LG11 | hypothetical protein CICLE_v1 | not DE   | not DE   | not DE   | not DE |
| EVM0010450 | LG11 | hypothetical protein CICLE_v1 | not DE   | not DE   | not DE   | not DE |

|            |      |                               |          |          |          |         |
|------------|------|-------------------------------|----------|----------|----------|---------|
| EVM0017931 | LG11 | hypothetical protein CICLE_v1 | not DE   | not DE   | not DE   | not DE  |
| EVM0024035 | LG11 | hypothetical protein CICLE_v1 | not DE   | not DE   | not DE   | not DE  |
| EVM0021344 | LG11 | hypothetical protein CICLE_v1 | not DE   | not DE   | not DE   | not DE  |
| EVM0001857 | LG11 | hypothetical protein CICLE_v1 | -1.6225  | 0.031985 | not DE   | not DE  |
| EVM0002246 | LG11 | hypothetical protein CICLE_v1 | not DE   | not DE   | not DE   | not DE  |
| EVM0013774 | LG11 | hypothetical protein CICLE_v1 | not DE   | not DE   | not DE   | not DE  |
| EVM0002757 | LG11 | hypothetical protein CICLE_v1 | not DE   | not DE   | not DE   | not DE  |
| EVM0021306 | LG11 | hypothetical protein CICLE_v1 | not DE   | not DE   | not DE   | not DE  |
| EVM0011198 | LG11 | hypothetical protein CICLE_v1 | not DE   | not DE   | not DE   | not DE  |
| EVM0003257 | LG11 | hypothetical protein CICLE_v1 | not DE   | not DE   | not DE   | not DE  |
| EVM0023309 | LG11 | hypothetical protein CICLE_v1 | not DE   | not DE   | not DE   | not DE  |
| EVM0010894 | LG11 | hypothetical protein CICLE_v1 | not DE   | not DE   | not DE   | not DE  |
| EVM0012771 | LG11 | hypothetical protein CICLE_v1 | not DE   | not DE   | not DE   | not DE  |
| EVM0004446 | LG11 | hypothetical protein CICLE_v1 | not DE   | not DE   | not DE   | not DE  |
| EVM0011816 | LG11 | hypothetical protein CICLE_v1 | not DE   | not DE   | not DE   | not DE  |
| EVM0001531 | LG11 | hypothetical protein CICLE_v1 | not DE   | not DE   | -1.20772 | 0.04473 |
| EVM0015221 | LG11 | hypothetical protein CICLE_v1 | not DE   | not DE   | not DE   | not DE  |
| EVM0001521 | LG11 | hypothetical protein CICLE_v1 | not DE   | not DE   | not DE   | not DE  |
| EVM0002056 | LG11 | hypothetical protein CICLE_v1 | not DE   | not DE   | not DE   | not DE  |
| EVM0000797 | LG11 | hypothetical protein CICLE_v1 | not DE   | not DE   | not DE   | not DE  |
| EVM0002352 | LG11 | hypothetical protein CICLE_v1 | not DE   | not DE   | not DE   | not DE  |
| EVM0003455 | LG11 | hypothetical protein CICLE_v1 | not DE   | not DE   | not DE   | not DE  |
| EVM0018560 | LG11 | hypothetical protein CICLE_v1 | not DE   | not DE   | not DE   | not DE  |
| EVM0013088 | LG11 | hypothetical protein CICLE_v1 | not DE   | not DE   | not DE   | not DE  |
| EVM0015232 | LG11 | hypothetical protein CICLE_v1 | not DE   | not DE   | not DE   | not DE  |
| EVM0012426 | LG11 | hypothetical protein CICLE_v1 | not DE   | not DE   | not DE   | not DE  |
| EVM0018367 | LG11 | hypothetical protein CICLE_v1 | not DE   | not DE   | not DE   | not DE  |
| EVM0023003 | LG11 | hypothetical protein CICLE_v1 | not DE   | not DE   | not DE   | not DE  |
| EVM0024069 | LG11 | hypothetical protein CICLE_v1 | not DE   | not DE   | not DE   | not DE  |
| EVM0004206 | LG11 | hypothetical protein CICLE_v1 | not DE   | not DE   | not DE   | not DE  |
| EVM0010435 | LG11 | hypothetical protein CICLE_v1 | not DE   | not DE   | not DE   | not DE  |
| EVM0008926 | LG11 | hypothetical protein CICLE_v1 | not DE   | not DE   | not DE   | not DE  |
| EVM0020446 | LG11 | hypothetical protein CICLE_v1 | not DE   | not DE   | not DE   | not DE  |
| EVM0003516 | LG11 | hypothetical protein CICLE_v1 | not DE   | not DE   | not DE   | not DE  |
| EVM0003009 | LG11 | hypothetical protein CICLE_v1 | not DE   | not DE   | not DE   | not DE  |
| EVM0023331 | LG11 | hypothetical protein CICLE_v1 | not DE   | not DE   | not DE   | not DE  |
| EVM0005231 | LG11 | hypothetical protein CICLE_v1 | not DE   | not DE   | not DE   | not DE  |
| EVM0007262 | LG11 | hypothetical protein CICLE_v1 | not DE   | not DE   | not DE   | not DE  |
| EVM0019304 | LG11 | hypothetical protein CICLE_v1 | not DE   | not DE   | not DE   | not DE  |
| EVM0003816 | LG11 | hypothetical protein CICLE_v1 | 2.13362  | 0.039637 | not DE   | not DE  |
| EVM0004952 | LG11 | hypothetical protein CICLE_v1 | not DE   | not DE   | not DE   | not DE  |
| EVM0017276 | LG11 | hypothetical protein CICLE_v1 | -1.09893 | 0.032036 | not DE   | not DE  |
| EVM0014571 | LG11 | hypothetical protein CICLE_v1 | not DE   | not DE   | not DE   | not DE  |
| EVM0014933 | LG11 | hypothetical protein CICLE_v1 | not DE   | not DE   | not DE   | not DE  |
| EVM0008460 | LG11 | hypothetical protein CICLE_v1 | not DE   | not DE   | not DE   | not DE  |
| EVM0000965 | LG11 | hypothetical protein CICLE_v1 | not DE   | not DE   | not DE   | not DE  |
| EVM0010091 | LG11 | hypothetical protein CICLE_v1 | not DE   | not DE   | not DE   | not DE  |
| EVM0015942 | LG11 | hypothetical protein CICLE_v1 | not DE   | not DE   | not DE   | not DE  |
| EVM0024477 | LG11 | hypothetical protein CICLE_v1 | not DE   | not DE   | not DE   | not DE  |
| EVM0004438 | LG11 | hypothetical protein CICLE_v1 | not DE   | not DE   | not DE   | not DE  |
| EVM0012807 | LG11 | hypothetical protein CICLE_v1 | 1.020779 | 0.010568 | not DE   | not DE  |
| EVM0010428 | LG11 | hypothetical protein CICLE_v1 | not DE   | not DE   | not DE   | not DE  |
| EVM0004141 | LG11 | hypothetical protein CICLE_v1 | 3.371335 | 6.87E-05 | not DE   | not DE  |
| EVM0004501 | LG11 | hypothetical protein CICLE_v1 | not DE   | not DE   | not DE   | not DE  |

|            |      |                               |          |          |          |         |
|------------|------|-------------------------------|----------|----------|----------|---------|
| EVM0005727 | LG11 | hypothetical protein CICLE_v1 | not DE   | not DE   | not DE   | not DE  |
| EVM0010128 | LG11 | hypothetical protein CICLE_v1 | not DE   | not DE   | not DE   | not DE  |
| EVM0012591 | LG11 | hypothetical protein CICLE_v1 | not DE   | not DE   | not DE   | not DE  |
| EVM0015187 | LG11 | hypothetical protein CICLE_v1 | not DE   | not DE   | not DE   | not DE  |
| EVM0003754 | LG11 | hypothetical protein CICLE_v1 | not DE   | not DE   | not DE   | not DE  |
| EVM0019728 | LG11 | hypothetical protein CICLE_v1 | not DE   | not DE   | not DE   | not DE  |
| EVM0021742 | LG11 | hypothetical protein CICLE_v1 | not DE   | not DE   | not DE   | not DE  |
| EVM0015797 | LG11 | hypothetical protein CICLE_v1 | -1.71725 | 0.003796 | not DE   | not DE  |
| EVM0011420 | LG11 | hypothetical protein CICLE_v1 | not DE   | not DE   | not DE   | not DE  |
| EVM0002331 | LG11 | hypothetical protein CICLE_v1 | not DE   | not DE   | not DE   | not DE  |
| EVM0016340 | LG11 | hypothetical protein CICLE_v1 | not DE   | not DE   | not DE   | not DE  |
| EVM0023625 | LG11 | hypothetical protein CICLE_v1 | -1.27651 | 0.001116 | not DE   | not DE  |
| EVM0018256 | LG11 | hypothetical protein CICLE_v1 | -1.32268 | 0.007917 | not DE   | not DE  |
| EVM0000697 | LG11 | hypothetical protein CICLE_v1 | not DE   | not DE   | not DE   | not DE  |
| EVM0004358 | LG11 | hypothetical protein CICLE_v1 | not DE   | not DE   | not DE   | not DE  |
| EVM0008823 | LG11 | hypothetical protein CICLE_v1 | not DE   | not DE   | 2.518242 | 0.0396  |
| EVM0007555 | LG11 | hypothetical protein CICLE_v1 | not DE   | not DE   | not DE   | not DE  |
| EVM0003650 | LG11 | hypothetical protein CICLE_v1 | not DE   | not DE   | not DE   | not DE  |
| EVM0017341 | LG11 | hypothetical protein CICLE_v1 | not DE   | not DE   | not DE   | not DE  |
| EVM0022479 | LG11 | hypothetical protein CICLE_v1 | not DE   | not DE   | not DE   | not DE  |
| EVM0022848 | LG11 | hypothetical protein CICLE_v1 | 1.095883 | 0.000619 | not DE   | not DE  |
| EVM0000683 | LG11 | hypothetical protein CICLE_v1 | not DE   | not DE   | not DE   | not DE  |
| EVM0001856 | LG11 | hypothetical protein CICLE_v1 | not DE   | not DE   | not DE   | not DE  |
| EVM0004090 | LG11 | hypothetical protein CICLE_v1 | not DE   | not DE   | not DE   | not DE  |
| EVM0010371 | LG11 | hypothetical protein CICLE_v1 | not DE   | not DE   | not DE   | not DE  |
| EVM0014477 | LG11 | hypothetical protein CICLE_v1 | not DE   | not DE   | not DE   | not DE  |
| EVM0021234 | LG11 | hypothetical protein CICLE_v1 | not DE   | not DE   | not DE   | not DE  |
| EVM0002462 | LG11 | hypothetical protein CICLE_v1 | not DE   | not DE   | not DE   | not DE  |
| EVM0015126 | LG11 | hypothetical protein CICLE_v1 | not DE   | not DE   | not DE   | not DE  |
| EVM0009454 | LG11 | hypothetical protein CICLE_v1 | not DE   | not DE   | not DE   | not DE  |
| EVM0001009 | LG11 | hypothetical protein CICLE_v1 | not DE   | not DE   | not DE   | not DE  |
| EVM0002302 | LG11 | hypothetical protein CICLE_v1 | not DE   | not DE   | not DE   | not DE  |
| EVM0011794 | LG11 | hypothetical protein CICLE_v1 | not DE   | not DE   | not DE   | not DE  |
| EVM0001719 | LG11 | hypothetical protein CICLE_v1 | not DE   | not DE   | not DE   | not DE  |
| EVM0020701 | LG11 | hypothetical protein CICLE_v1 | not DE   | not DE   | not DE   | not DE  |
| EVM0023304 | LG11 | hypothetical protein CICLE_v1 | not DE   | not DE   | -1.46674 | 0.00016 |
| EVM0009694 | LG11 | hypothetical protein CICLE_v1 | -4.91613 | 7.01E-39 | -1.57613 | #####   |
| EVM0016256 | LG11 | hypothetical protein CICLE_v1 | not DE   | not DE   | not DE   | not DE  |
| EVM0017007 | LG11 | hypothetical protein CICLE_v1 | not DE   | not DE   | not DE   | not DE  |
| EVM0016255 | LG11 | hypothetical protein CICLE_v1 | not DE   | not DE   | not DE   | not DE  |
| EVM0001168 | LG11 | hypothetical protein CICLE_v1 | not DE   | not DE   | not DE   | not DE  |
| EVM0014612 | LG11 | hypothetical protein CICLE_v1 | 4.324197 | 2.14E-09 | not DE   | not DE  |
| EVM0007188 | LG11 | hypothetical protein CICLE_v1 | -1.41373 | 0.000619 | not DE   | not DE  |
| EVM0018776 | LG11 | hypothetical protein CICLE_v1 | not DE   | not DE   | not DE   | not DE  |
| EVM0013620 | LG11 | hypothetical protein CICLE_v1 | not DE   | not DE   | not DE   | not DE  |
| EVM0007946 | LG11 | hypothetical protein CICLE_v1 | not DE   | not DE   | not DE   | not DE  |
| EVM0017598 | LG11 | hypothetical protein CICLE_v1 | not DE   | not DE   | not DE   | not DE  |
| EVM0016527 | LG11 | hypothetical protein CICLE_v1 | not DE   | not DE   | not DE   | not DE  |
| EVM0022558 | LG11 | hypothetical protein CICLE_v1 | not DE   | not DE   | not DE   | not DE  |
| EVM0005598 | LG11 | hypothetical protein CICLE_v1 | not DE   | not DE   | not DE   | not DE  |
| EVM0005116 | LG11 | hypothetical protein CICLE_v1 | not DE   | not DE   | not DE   | not DE  |
| EVM0021292 | LG11 | hypothetical protein CICLE_v1 | not DE   | not DE   | not DE   | not DE  |
| EVM0005482 | LG11 | hypothetical protein CICLE_v1 | not DE   | not DE   | not DE   | not DE  |
| EVM0014971 | LG11 | hypothetical protein CICLE_v1 | not DE   | not DE   | not DE   | not DE  |

|            |      |                               |          |          |          |         |
|------------|------|-------------------------------|----------|----------|----------|---------|
| EVM0000217 | LG11 | hypothetical protein CICLE_v1 | not DE   | not DE   | not DE   | not DE  |
| EVM0023859 | LG11 | hypothetical protein CICLE_v1 | not DE   | not DE   | not DE   | not DE  |
| EVM0018493 | LG11 | hypothetical protein CICLE_v1 | not DE   | not DE   | not DE   | not DE  |
| EVM0017514 | LG11 | hypothetical protein CICLE_v1 | not DE   | not DE   | not DE   | not DE  |
| EVM0019639 | LG11 | hypothetical protein CICLE_v1 | not DE   | not DE   | not DE   | not DE  |
| EVM0020009 | LG11 | hypothetical protein CICLE_v1 | not DE   | not DE   | not DE   | not DE  |
| EVM0005970 | LG11 | hypothetical protein CICLE_v1 | not DE   | not DE   | not DE   | not DE  |
| EVM0022883 | LG11 | hypothetical protein CICLE_v1 | not DE   | not DE   | not DE   | not DE  |
| EVM0008770 | LG11 | hypothetical protein CICLE_v1 | not DE   | not DE   | not DE   | not DE  |
| EVM0019463 | LG11 | hypothetical protein CICLE_v1 | not DE   | not DE   | not DE   | not DE  |
| EVM0013140 | LG11 | hypothetical protein CICLE_v1 | not DE   | not DE   | not DE   | not DE  |
| EVM0003477 | LG11 | hypothetical protein CICLE_v1 | not DE   | not DE   | not DE   | not DE  |
| EVM0015379 | LG11 | hypothetical protein CICLE_v1 | not DE   | not DE   | not DE   | not DE  |
| EVM0006969 | LG11 | hypothetical protein CICLE_v1 | not DE   | not DE   | not DE   | not DE  |
| EVM0016651 | LG11 | hypothetical protein CICLE_v1 | not DE   | not DE   | not DE   | not DE  |
| EVM0022055 | LG11 | hypothetical protein CICLE_v1 | not DE   | not DE   | not DE   | not DE  |
| EVM0000736 | LG11 | hypothetical protein CICLE_v1 | not DE   | not DE   | not DE   | not DE  |
| EVM0024554 | LG11 | hypothetical protein CICLE_v1 | not DE   | not DE   | not DE   | not DE  |
| EVM0003176 | LG11 | hypothetical protein CICLE_v1 | not DE   | not DE   | not DE   | not DE  |
| EVM0024000 | LG11 | hypothetical protein CICLE_v1 | 1.450048 | 0.018497 | not DE   | not DE  |
| EVM0019072 | LG11 | hypothetical protein CICLE_v1 | not DE   | not DE   | not DE   | not DE  |
| EVM0002844 | LG11 | hypothetical protein CICLE_v1 | not DE   | not DE   | not DE   | not DE  |
| EVM0005100 | LG11 | hypothetical protein CICLE_v1 | not DE   | not DE   | not DE   | not DE  |
| EVM0022169 | LG11 | hypothetical protein CICLE_v1 | not DE   | not DE   | not DE   | not DE  |
| EVM0014961 | LG11 | hypothetical protein CICLE_v1 | not DE   | not DE   | not DE   | not DE  |
| EVM0022924 | LG11 | hypothetical protein CICLE_v1 | not DE   | not DE   | not DE   | not DE  |
| EVM0005505 | LG11 | hypothetical protein CICLE_v1 | not DE   | not DE   | not DE   | not DE  |
| EVM0007183 | LG11 | hypothetical protein CICLE_v1 | not DE   | not DE   | not DE   | not DE  |
| EVM0002567 | LG11 | hypothetical protein CICLE_v1 | not DE   | not DE   | not DE   | not DE  |
| EVM0023683 | LG11 | hypothetical protein CICLE_v1 | not DE   | not DE   | not DE   | not DE  |
| EVM0005785 | LG11 | hypothetical protein CICLE_v1 | not DE   | not DE   | not DE   | not DE  |
| EVM0019542 | LG11 | hypothetical protein CICLE_v1 | not DE   | not DE   | not DE   | not DE  |
| EVM0017114 | LG11 | hypothetical protein CICLE_v1 | not DE   | not DE   | not DE   | not DE  |
| EVM0008874 | LG11 | hypothetical protein CICLE_v1 | 1.701276 | 0.028972 | not DE   | not DE  |
| EVM0011765 | LG11 | hypothetical protein CICLE_v1 | not DE   | not DE   | not DE   | not DE  |
| EVM0021634 | LG11 | hypothetical protein CICLE_v1 | not DE   | not DE   | not DE   | not DE  |
| EVM0002791 | LG11 | hypothetical protein CICLE_v1 | not DE   | not DE   | not DE   | not DE  |
| EVM0018175 | LG11 | hypothetical protein CICLE_v1 | not DE   | not DE   | not DE   | not DE  |
| EVM0010016 | LG11 | hypothetical protein CICLE_v1 | not DE   | not DE   | 1.497733 | 0.00561 |
| EVM0015712 | LG11 | hypothetical protein CICLE_v1 | not DE   | not DE   | not DE   | not DE  |
| EVM0004232 | LG11 | hypothetical protein CICLE_v1 | not DE   | not DE   | not DE   | not DE  |
| EVM0020256 | LG11 | hypothetical protein CICLE_v1 | not DE   | not DE   | not DE   | not DE  |
| EVM0010012 | LG11 | hypothetical protein CICLE_v1 | not DE   | not DE   | not DE   | not DE  |
| EVM0009873 | LG11 | hypothetical protein CICLE_v1 | not DE   | not DE   | not DE   | not DE  |
| EVM0012072 | LG11 | hypothetical protein CICLE_v1 | not DE   | not DE   | not DE   | not DE  |
| EVM0003610 | LG11 | hypothetical protein CICLE_v1 | not DE   | not DE   | not DE   | not DE  |
| EVM0000275 | LG11 | hypothetical protein CICLE_v1 | not DE   | not DE   | not DE   | not DE  |
| EVM0021087 | LG11 | hypothetical protein CICLE_v1 | not DE   | not DE   | not DE   | not DE  |
| EVM0006007 | LG11 | hypothetical protein CICLE_v1 | not DE   | not DE   | not DE   | not DE  |
| EVM0018900 | LG11 | hypothetical protein CICLE_v1 | not DE   | not DE   | not DE   | not DE  |
| EVM0000479 | LG11 | hypothetical protein CICLE_v1 | not DE   | not DE   | not DE   | not DE  |
| EVM0004381 | LG11 | hypothetical protein CICLE_v1 | not DE   | not DE   | not DE   | not DE  |
| EVM0006633 | LG11 | hypothetical protein CICLE_v1 | not DE   | not DE   | not DE   | not DE  |
| EVM0011331 | LG11 | hypothetical protein CICLE_v1 | not DE   | not DE   | not DE   | not DE  |



|            |      |                               |          |          |          |         |
|------------|------|-------------------------------|----------|----------|----------|---------|
| EVM0019022 | LG11 | hypothetical protein CICLE_v1 | not DE   | not DE   | 1.913456 | 0.03557 |
| EVM0021838 | LG11 | hypothetical protein CICLE_v1 | not DE   | not DE   | not DE   | not DE  |
| EVM0000663 | LG11 | hypothetical protein CICLE_v1 | not DE   | not DE   | not DE   | not DE  |
| EVM0000244 | LG11 | hypothetical protein CICLE_v1 | not DE   | not DE   | not DE   | not DE  |
| EVM0005314 | LG11 | hypothetical protein CICLE_v1 | not DE   | not DE   | not DE   | not DE  |
| EVM0009277 | LG11 | hypothetical protein CICLE_v1 | not DE   | not DE   | not DE   | not DE  |
| EVM0000328 | LG11 | hypothetical protein CICLE_v1 | not DE   | not DE   | not DE   | not DE  |
| EVM0015870 | LG11 | hypothetical protein CICLE_v1 | not DE   | not DE   | not DE   | not DE  |
| EVM0012287 | LG11 | hypothetical protein CICLE_v1 | 2.363941 | 0.041356 | not DE   | not DE  |
| EVM0013474 | LG11 | hypothetical protein CICLE_v1 | not DE   | not DE   | not DE   | not DE  |
| EVM0010848 | LG11 | hypothetical protein CICLE_v1 | not DE   | not DE   | not DE   | not DE  |
| EVM0015618 | LG11 | hypothetical protein CICLE_v1 | not DE   | not DE   | not DE   | not DE  |
| EVM0008106 | LG11 | hypothetical protein CICLE_v1 | not DE   | not DE   | not DE   | not DE  |
| EVM0023421 | LG11 | hypothetical protein CICLE_v1 | not DE   | not DE   | not DE   | not DE  |
| EVM0019577 | LG11 | hypothetical protein CICLE_v1 | not DE   | not DE   | not DE   | not DE  |
| EVM0022524 | LG11 | hypothetical protein CICLE_v1 | not DE   | not DE   | not DE   | not DE  |
| EVM0017357 | LG11 | hypothetical protein CICLE_v1 | not DE   | not DE   | not DE   | not DE  |
| EVM0003456 | LG11 | hypothetical protein CICLE_v1 | not DE   | not DE   | not DE   | not DE  |
| EVM0004958 | LG11 | hypothetical protein CICLE_v1 | not DE   | not DE   | not DE   | not DE  |
| EVM0021083 | LG11 | hypothetical protein CICLE_v1 | not DE   | not DE   | not DE   | not DE  |
| EVM0023145 | LG11 | hypothetical protein CICLE_v1 | not DE   | not DE   | not DE   | not DE  |
| EVM0008284 | LG11 | hypothetical protein CICLE_v1 | not DE   | not DE   | not DE   | not DE  |
| EVM0002289 | LG11 | hypothetical protein CICLE_v1 | not DE   | not DE   | not DE   | not DE  |
| EVM0007335 | LG11 | hypothetical protein CICLE_v1 | not DE   | not DE   | not DE   | not DE  |
| EVM0010967 | LG11 | hypothetical protein CICLE_v1 | not DE   | not DE   | not DE   | not DE  |
| EVM0005159 | LG11 | hypothetical protein CICLE_v1 | not DE   | not DE   | not DE   | not DE  |
| EVM0022805 | LG11 | hypothetical protein CICLE_v1 | not DE   | not DE   | not DE   | not DE  |
| EVM0016296 | LG11 | hypothetical protein CICLE_v1 | not DE   | not DE   | not DE   | not DE  |
| EVM0001177 | LG11 | hypothetical protein CICLE_v1 | not DE   | not DE   | not DE   | not DE  |
| EVM0013875 | LG11 | hypothetical protein CICLE_v1 | not DE   | not DE   | not DE   | not DE  |
| EVM0004477 | LG11 | hypothetical protein CICLE_v1 | not DE   | not DE   | not DE   | not DE  |
| EVM0014344 | LG11 | hypothetical protein CICLE_v1 | not DE   | not DE   | not DE   | not DE  |
| EVM0008188 | LG11 | hypothetical protein CICLE_v1 | not DE   | not DE   | not DE   | not DE  |
| EVM0013018 | LG11 | hypothetical protein CICLE_v1 | not DE   | not DE   | not DE   | not DE  |
| EVM0002320 | LG11 | hypothetical protein CICLE_v1 | not DE   | not DE   | not DE   | not DE  |
| EVM0024668 | LG11 | hypothetical protein CICLE_v1 | not DE   | not DE   | not DE   | not DE  |
| EVM0011565 | LG11 | hypothetical protein CICLE_v1 | not DE   | not DE   | not DE   | not DE  |
| EVM0008506 | LG11 | hypothetical protein CICLE_v1 | not DE   | not DE   | not DE   | not DE  |
| EVM0017782 | LG11 | hypothetical protein CICLE_v1 | not DE   | not DE   | not DE   | not DE  |
| EVM0001398 | LG11 | hypothetical protein CICLE_v1 | not DE   | not DE   | not DE   | not DE  |
| EVM0012806 | LG11 | hypothetical protein CICLE_v1 | not DE   | not DE   | -1.19488 | #####   |
| EVM0006249 | LG11 | hypothetical protein CICLE_v1 | not DE   | not DE   | not DE   | not DE  |
| EVM0015806 | LG11 | hypothetical protein CICLE_v1 | not DE   | not DE   | not DE   | not DE  |
| EVM0023585 | LG11 | hypothetical protein CICLE_v1 | not DE   | not DE   | not DE   | not DE  |
| EVM0012416 | LG11 | hypothetical protein CICLE_v1 | not DE   | not DE   | not DE   | not DE  |
| EVM0021395 | LG11 | hypothetical protein CICLE_v1 | not DE   | not DE   | not DE   | not DE  |
| EVM0009443 | LG11 | hypothetical protein CICLE_v1 | not DE   | not DE   | not DE   | not DE  |
| EVM0015217 | LG11 | hypothetical protein CICLE_v1 | not DE   | not DE   | -1.7295  | #####   |
| EVM0003566 | LG11 | hypothetical protein CICLE_v1 | not DE   | not DE   | not DE   | not DE  |
| EVM0020039 | LG11 | hypothetical protein CICLE_v1 | not DE   | not DE   | not DE   | not DE  |
| EVM0010960 | LG11 | hypothetical protein CICLE_v1 | not DE   | not DE   | not DE   | not DE  |
| EVM0011059 | LG11 | hypothetical protein CICLE_v1 | not DE   | not DE   | not DE   | not DE  |
| EVM0009765 | LG11 | hypothetical protein CICLE_v1 | not DE   | not DE   | not DE   | not DE  |
| EVM0000815 | LG11 | hypothetical protein CICLE_v1 | not DE   | not DE   | not DE   | not DE  |

|            |      |                               |          |          |          |         |
|------------|------|-------------------------------|----------|----------|----------|---------|
| EVM0001792 | LG11 | hypothetical protein CICLE_v1 | not DE   | not DE   | not DE   | not DE  |
| EVM0014509 | LG11 | hypothetical protein CICLE_v1 | not DE   | not DE   | not DE   | not DE  |
| EVM0014921 | LG11 | hypothetical protein CICLE_v1 | not DE   | not DE   | not DE   | not DE  |
| EVM0020581 | LG11 | hypothetical protein CICLE_v1 | not DE   | not DE   | not DE   | not DE  |
| EVM0000316 | LG11 | hypothetical protein CICLE_v1 | not DE   | not DE   | not DE   | not DE  |
| EVM0020322 | LG11 | hypothetical protein CICLE_v1 | not DE   | not DE   | not DE   | not DE  |
| EVM0013337 | LG11 | hypothetical protein CICLE_v1 | not DE   | not DE   | not DE   | not DE  |
| EVM0015753 | LG11 | hypothetical protein CICLE_v1 | not DE   | not DE   | not DE   | not DE  |
| EVM0020315 | LG11 | hypothetical protein CICLE_v1 | not DE   | not DE   | not DE   | not DE  |
| EVM0000948 | LG11 | hypothetical protein CICLE_v1 | not DE   | not DE   | not DE   | not DE  |
| EVM0015240 | LG11 | hypothetical protein CICLE_v1 | not DE   | not DE   | not DE   | not DE  |
| EVM0018401 | LG11 | hypothetical protein CICLE_v1 | not DE   | not DE   | not DE   | not DE  |
| EVM0005615 | LG11 | hypothetical protein CICLE_v1 | -1.02878 | 1.06E-06 | not DE   | not DE  |
| EVM0013835 | LG11 | hypothetical protein CICLE_v1 | not DE   | not DE   | not DE   | not DE  |
| EVM0006111 | LG11 | hypothetical protein CICLE_v1 | not DE   | not DE   | not DE   | not DE  |
| EVM0023134 | LG11 | hypothetical protein CICLE_v1 | not DE   | not DE   | not DE   | not DE  |
| EVM0015228 | LG11 | hypothetical protein CICLE_v1 | not DE   | not DE   | not DE   | not DE  |
| EVM0011380 | LG11 | hypothetical protein CICLE_v1 | not DE   | not DE   | not DE   | not DE  |
| EVM0020516 | LG11 | hypothetical protein CICLE_v1 | not DE   | not DE   | not DE   | not DE  |
| EVM0020631 | LG11 | hypothetical protein CICLE_v1 | not DE   | not DE   | 1.4407   | 0.01394 |
| EVM0020791 | LG11 | hypothetical protein CICLE_v1 | not DE   | not DE   | not DE   | not DE  |
| EVM0001423 | LG11 | hypothetical protein CICLE_v1 | not DE   | not DE   | 1.920453 | 0.04812 |
| EVM0023355 | LG11 | hypothetical protein CICLE_v1 | not DE   | not DE   | 1.821754 | 0.0034  |
| EVM0007346 | LG11 | hypothetical protein CICLE_v1 | -2.2193  | 0.005151 | -3.5083  | 0.00063 |
| EVM0009675 | LG11 | hypothetical protein CICLE_v1 | not DE   | not DE   | not DE   | not DE  |
| EVM0001636 | LG11 | hypothetical protein CICLE_v1 | 3.338062 | 0.021537 | 5.480108 | 0.00049 |
| EVM0006537 | LG11 | hypothetical protein CICLE_v1 | not DE   | not DE   | not DE   | not DE  |
| EVM0011945 | LG11 | hypothetical protein CICLE_v1 | not DE   | not DE   | not DE   | not DE  |
| EVM0023069 | LG11 | hypothetical protein CICLE_v1 | 1.829669 | 0.029312 | -1.41741 | 0.03473 |
| EVM0013632 | LG11 | hypothetical protein CICLE_v1 | not DE   | not DE   | not DE   | not DE  |
| EVM0006970 | LG11 | hypothetical protein CICLE_v1 | not DE   | not DE   | not DE   | not DE  |
| EVM0005551 | LG11 | hypothetical protein CICLE_v1 | not DE   | not DE   | not DE   | not DE  |
| EVM0009691 | LG11 | hypothetical protein CICLE_v1 | not DE   | not DE   | not DE   | not DE  |
| EVM0000872 | LG11 | hypothetical protein CICLE_v1 | not DE   | not DE   | not DE   | not DE  |
| EVM0020651 | LG11 | hypothetical protein CICLE_v1 | not DE   | not DE   | not DE   | not DE  |
| EVM0018396 | LG11 | hypothetical protein CICLE_v1 | not DE   | not DE   | not DE   | not DE  |
| EVM0005067 | LG11 | hypothetical protein CICLE_v1 | not DE   | not DE   | not DE   | not DE  |
| EVM0022673 | LG11 | hypothetical protein CICLE_v1 | not DE   | not DE   | not DE   | not DE  |
| EVM0002088 | LG11 | hypothetical protein CICLE_v1 | not DE   | not DE   | not DE   | not DE  |
| EVM0010147 | LG11 | hypothetical protein CICLE_v1 | not DE   | not DE   | not DE   | not DE  |
| EVM0006779 | LG11 | hypothetical protein CICLE_v1 | not DE   | not DE   | not DE   | not DE  |
| EVM0017268 | LG11 | hypothetical protein CICLE_v1 | not DE   | not DE   | not DE   | not DE  |
| EVM0014746 | LG11 | hypothetical protein CICLE_v1 | not DE   | not DE   | not DE   | not DE  |
| EVM0017870 | LG11 | hypothetical protein CICLE_v1 | not DE   | not DE   | not DE   | not DE  |
| EVM0021750 | LG11 | hypothetical protein CICLE_v1 | not DE   | not DE   | not DE   | not DE  |
| EVM0007522 | LG11 | hypothetical protein CICLE_v1 | not DE   | not DE   | not DE   | not DE  |
| EVM0016004 | LG11 | hypothetical protein CICLE_v1 | not DE   | not DE   | not DE   | not DE  |
| EVM0017777 | LG11 | hypothetical protein CICLE_v1 | not DE   | not DE   | not DE   | not DE  |
| EVM0011811 | LG11 | hypothetical protein CICLE_v1 | not DE   | not DE   | not DE   | not DE  |
| EVM0012720 | LG11 | hypothetical protein CICLE_v1 | not DE   | not DE   | not DE   | not DE  |
| EVM0004608 | LG11 | hypothetical protein CICLE_v1 | not DE   | not DE   | not DE   | not DE  |
| EVM0021090 | LG11 | hypothetical protein CICLE_v1 | not DE   | not DE   | not DE   | not DE  |
| EVM0007913 | LG11 | hypothetical protein CICLE_v1 | not DE   | not DE   | not DE   | not DE  |
| EVM0022715 | LG11 | hypothetical protein CICLE_v1 | not DE   | not DE   | not DE   | not DE  |

|            |      |                               |           |           |           |          |
|------------|------|-------------------------------|-----------|-----------|-----------|----------|
| EVM0009186 | LG11 | hypothetical protein CICLE_v1 | not DE    | not DE    | not DE    | not DE   |
| EVM0024550 | LG11 | hypothetical protein CICLE_v1 | not DE    | not DE    | not DE    | not DE   |
| EVM0009275 | LG11 | hypothetical protein CICLE_v1 | not DE    | not DE    | not DE    | not DE   |
| EVM0007298 | LG11 | hypothetical protein CICLE_v1 | not DE    | not DE    | not DE    | not DE   |
| EVM0017982 | LG11 | hypothetical protein CICLE_v1 | -4. 98904 | 5. 91E-12 | -2. 20773 | #####    |
| EVM0021391 | LG11 | hypothetical protein CICLE_v1 | not DE    | not DE    | not DE    | not DE   |
| EVM0018665 | LG11 | hypothetical protein CICLE_v1 | not DE    | not DE    | not DE    | not DE   |
| EVM0003487 | LG11 | hypothetical protein CICLE_v1 | not DE    | not DE    | not DE    | not DE   |
| EVM0023575 | LG11 | hypothetical protein CICLE_v1 | not DE    | not DE    | not DE    | not DE   |
| EVM0022078 | LG11 | hypothetical protein CICLE_v1 | not DE    | not DE    | not DE    | not DE   |
| EVM0003498 | LG11 | hypothetical protein CICLE_v1 | not DE    | not DE    | not DE    | not DE   |
| EVM0003417 | LG11 | hypothetical protein CICLE_v1 | not DE    | not DE    | not DE    | not DE   |
| EVM0000854 | LG11 | hypothetical protein CICLE_v1 | -1. 7757  | 0. 002663 | 1. 203304 | #####    |
| EVM0019662 | LG11 | hypothetical protein CICLE_v1 | not DE    | not DE    | not DE    | not DE   |
| EVM0008745 | LG11 | hypothetical protein CICLE_v1 | not DE    | not DE    | not DE    | not DE   |
| EVM0023485 | LG11 | hypothetical protein CICLE_v1 | not DE    | not DE    | not DE    | not DE   |
| EVM0003344 | LG11 | hypothetical protein CICLE_v1 | not DE    | not DE    | not DE    | not DE   |
| EVM0017593 | LG11 | hypothetical protein CICLE_v1 | not DE    | not DE    | not DE    | not DE   |
| EVM0022602 | LG11 | hypothetical protein CICLE_v1 | not DE    | not DE    | not DE    | not DE   |
| EVM0002748 | LG11 | hypothetical protein CICLE_v1 | not DE    | not DE    | not DE    | not DE   |
| EVM0016946 | LG11 | hypothetical protein CICLE_v1 | -4. 77659 | 1. 23E-05 | not DE    | not DE   |
| EVM0011408 | LG11 | hypothetical protein CICLE_v1 | not DE    | not DE    | not DE    | not DE   |
| EVM0001337 | LG11 | hypothetical protein CICLE_v1 | not DE    | not DE    | not DE    | not DE   |
| EVM0007163 | LG11 | hypothetical protein CICLE_v1 | not DE    | not DE    | not DE    | not DE   |
| EVM0015599 | LG11 | hypothetical protein CICLE_v1 | not DE    | not DE    | not DE    | not DE   |
| EVM0014237 | LG11 | hypothetical protein CICLE_v1 | not DE    | not DE    | not DE    | not DE   |
| EVM0001828 | LG11 | hypothetical protein CICLE_v1 | not DE    | not DE    | not DE    | not DE   |
| EVM0005746 | LG11 | hypothetical protein CICLE_v1 | not DE    | not DE    | not DE    | not DE   |
| EVM0010034 | LG11 | hypothetical protein CICLE_v1 | not DE    | not DE    | not DE    | not DE   |
| EVM0023333 | LG11 | hypothetical protein CICLE_v1 | not DE    | not DE    | not DE    | not DE   |
| EVM0000686 | LG11 | hypothetical protein CICLE_v1 | not DE    | not DE    | not DE    | not DE   |
| EVM0009546 | LG11 | hypothetical protein CISIN_1g | not DE    | not DE    | not DE    | not DE   |
| EVM0007691 | LG11 | hypothetical protein CISIN_1g | not DE    | not DE    | not DE    | not DE   |
| EVM0018978 | LG11 | hypothetical protein CISIN_1g | not DE    | not DE    | not DE    | not DE   |
| EVM0009373 | LG11 | hypothetical protein CISIN_1g | not DE    | not DE    | not DE    | not DE   |
| EVM0001180 | LG11 | hypothetical protein CISIN_1g | not DE    | not DE    | not DE    | not DE   |
| EVM0010391 | LG11 | hypothetical protein CISIN_1g | not DE    | not DE    | not DE    | not DE   |
| EVM0018993 | LG11 | hypothetical protein CISIN_1g | not DE    | not DE    | not DE    | not DE   |
| EVM0015795 | LG11 | hypothetical protein CISIN_1g | not DE    | not DE    | 1. 821892 | 0. 03334 |
| EVM0008553 | LG11 | hypothetical protein CISIN_1g | not DE    | not DE    | not DE    | not DE   |
| EVM0010057 | LG11 | hypothetical protein CISIN_1g | not DE    | not DE    | not DE    | not DE   |
| EVM0008266 | LG11 | hypothetical protein CISIN_1g | not DE    | not DE    | not DE    | not DE   |
| EVM0022575 | LG11 | hypothetical protein CISIN_1g | not DE    | not DE    | not DE    | not DE   |
| EVM0016805 | LG11 | hypothetical protein CISIN_1g | not DE    | not DE    | not DE    | not DE   |
| EVM0012714 | LG11 | hypothetical protein CISIN_1g | not DE    | not DE    | not DE    | not DE   |
| EVM0015739 | LG11 | hypothetical protein CISIN_1g | not DE    | not DE    | not DE    | not DE   |
| EVM0004140 | LG11 | hypothetical protein CISIN_1g | not DE    | not DE    | not DE    | not DE   |
| EVM0004082 | LG11 | hypothetical protein CISIN_1g | 2. 349705 | 0. 006715 | not DE    | not DE   |
| EVM0012237 | LG11 | hypothetical protein CISIN_1g | not DE    | not DE    | not DE    | not DE   |
| EVM0016396 | LG11 | hypothetical protein CISIN_1g | not DE    | not DE    | not DE    | not DE   |
| EVM0016566 | LG11 | hypothetical protein CISIN_1g | not DE    | not DE    | not DE    | not DE   |
| EVM0004903 | LG11 | hypothetical protein CISIN_1g | not DE    | not DE    | not DE    | not DE   |
| EVM0009281 | LG11 | hypothetical protein CISIN_1g | not DE    | not DE    | not DE    | not DE   |
| EVM0004021 | LG11 | hypothetical protein CISIN_1g | not DE    | not DE    | -2. 34498 | 0. 04385 |

|            |      |                               |          |          |          |        |
|------------|------|-------------------------------|----------|----------|----------|--------|
| EVM0004450 | LG11 | hypothetical protein CISIN_1g | not DE   | not DE   | not DE   | not DE |
| EVM0004460 | LG11 | hypothetical protein CISIN_1g | not DE   | not DE   | not DE   | not DE |
| EVM0024298 | LG11 | hypothetical protein CISIN_1g | not DE   | not DE   | not DE   | not DE |
| EVM0012337 | LG11 | hypothetical protein CISIN_1g | not DE   | not DE   | not DE   | not DE |
| EVM0013686 | LG11 | hypothetical protein CISIN_1g | not DE   | not DE   | -1.0747  | #####  |
| EVM0007660 | LG11 | hypothetical protein CISIN_1g | not DE   | not DE   | not DE   | not DE |
| EVM0009027 | LG11 | hypothetical protein CISIN_1g | not DE   | not DE   | not DE   | not DE |
| EVM0023054 | LG11 | hypothetical protein CISIN_1g | not DE   | not DE   | not DE   | not DE |
| EVM0010691 | LG11 | hypothetical protein CISIN_1g | not DE   | not DE   | not DE   | not DE |
| EVM0019746 | LG11 | hypothetical protein CISIN_1g | not DE   | not DE   | not DE   | not DE |
| EVM0018266 | LG11 | hypothetical protein CISIN_1g | not DE   | not DE   | not DE   | not DE |
| EVM0019747 | LG11 | hypothetical protein CISIN_1g | not DE   | not DE   | not DE   | not DE |
| EVM0006693 | LG11 | hypothetical protein CISIN_1g | not DE   | not DE   | not DE   | not DE |
| EVM0003571 | LG11 | hypothetical protein CISIN_1g | not DE   | not DE   | not DE   | not DE |
| EVM0018640 | LG11 | hypothetical protein CISIN_1g | not DE   | not DE   | not DE   | not DE |
| EVM0003254 | LG11 | hypothetical protein CISIN_1g | not DE   | not DE   | not DE   | not DE |
| EVM0001819 | LG11 | hypothetical protein CISIN_1g | not DE   | not DE   | not DE   | not DE |
| EVM0001876 | LG11 | hypothetical protein CISIN_1g | not DE   | not DE   | not DE   | not DE |
| EVM0016995 | LG11 | hypothetical protein CISIN_1g | not DE   | not DE   | not DE   | not DE |
| EVM0020184 | LG11 | hypothetical protein CISIN_1g | -3.93182 | 6.23E-11 | -2.05732 | #####  |
| EVM0020827 | LG11 | hypothetical protein CISIN_1g | not DE   | not DE   | not DE   | not DE |
| EVM0021110 | LG11 | hypothetical protein CISIN_1g | not DE   | not DE   | not DE   | not DE |
| EVM0024306 | LG11 | hypothetical protein CISIN_1g | not DE   | not DE   | not DE   | not DE |
| EVM0018512 | LG11 | hypothetical protein CISIN_1g | not DE   | not DE   | not DE   | not DE |
| EVM0000361 | LG11 | hypothetical protein CISIN_1g | not DE   | not DE   | not DE   | not DE |
| EVM0021633 | LG11 | hypothetical protein CISIN_1g | not DE   | not DE   | not DE   | not DE |
| EVM0010070 | LG11 | hypothetical protein CISIN_1g | not DE   | not DE   | not DE   | not DE |
| EVM0009298 | LG11 | hypothetical protein CISIN_1g | not DE   | not DE   | not DE   | not DE |
| EVM0015997 | LG11 | hypothetical protein CISIN_1g | not DE   | not DE   | not DE   | not DE |
| EVM0002223 | LG11 | hypothetical protein CISIN_1g | not DE   | not DE   | not DE   | not DE |
| EVM0004470 | LG11 | hypothetical protein CISIN_1g | not DE   | not DE   | not DE   | not DE |
| EVM0020839 | LG11 | hypothetical protein CISIN_1g | not DE   | not DE   | not DE   | not DE |
| EVM0022206 | LG11 | hypothetical protein CISIN_1g | -1.76821 | 0.021358 | not DE   | not DE |
| EVM0003540 | LG11 | hypothetical protein CISIN_1g | not DE   | not DE   | not DE   | not DE |
| EVM0017811 | LG11 | hypothetical protein CISIN_1g | not DE   | not DE   | not DE   | not DE |
| EVM0009438 | LG11 | hypothetical protein CISIN_1g | not DE   | not DE   | not DE   | not DE |
| EVM0007762 | LG11 | hypothetical protein CISIN_1g | 1.231994 | 0.003869 | not DE   | not DE |
| EVM0011740 | LG11 | hypothetical protein CISIN_1g | not DE   | not DE   | not DE   | not DE |
| EVM0015321 | LG11 | hypothetical protein CISIN_1g | not DE   | not DE   | not DE   | not DE |
| EVM0015703 | LG11 | hypothetical protein CISIN_1g | not DE   | not DE   | not DE   | not DE |
| EVM0003749 | LG11 | hypothetical protein CISIN_1g | not DE   | not DE   | not DE   | not DE |
| EVM0003586 | LG11 | hypothetical protein CISIN_1g | 1.607564 | 0.021513 | not DE   | not DE |
| EVM0018498 | LG11 | hypothetical protein CISIN_1g | 2.371205 | 0.000103 | not DE   | not DE |
| EVM0005483 | LG11 | hypothetical protein CISIN_1g | not DE   | not DE   | not DE   | not DE |
| EVM0009100 | LG11 | hypothetical protein CISIN_1g | not DE   | not DE   | not DE   | not DE |
| EVM0005502 | LG11 | hypothetical protein CISIN_1g | not DE   | not DE   | not DE   | not DE |
| EVM0001530 | LG11 | hypothetical protein CISIN_1g | not DE   | not DE   | not DE   | not DE |
| EVM0013605 | LG11 | hypothetical protein CISIN_1g | -1.39963 | 0.000247 | not DE   | not DE |
| EVM0019254 | LG11 | hypothetical protein CISIN_1g | not DE   | not DE   | not DE   | not DE |
| EVM0011445 | LG11 | hypothetical protein CISIN_1g | not DE   | not DE   | not DE   | not DE |
| EVM0006365 | LG11 | hypothetical protein CISIN_1g | not DE   | not DE   | not DE   | not DE |
| EVM0009547 | LG11 | hypothetical protein CISIN_1g | not DE   | not DE   | not DE   | not DE |
| EVM0011121 | LG11 | hypothetical protein CISIN_1g | not DE   | not DE   | not DE   | not DE |
| EVM0014171 | LG11 | hypothetical protein CISIN_1g | not DE   | not DE   | not DE   | not DE |

|            |      |                               |          |          |          |         |
|------------|------|-------------------------------|----------|----------|----------|---------|
| EVM0018872 | LG11 | hypothetical protein CISIN_1g | not DE   | not DE   | not DE   | not DE  |
| EVM0016825 | LG11 | hypothetical protein CISIN_1g | not DE   | not DE   | not DE   | not DE  |
| EVM0010182 | LG11 | hypothetical protein CISIN_1g | not DE   | not DE   | not DE   | not DE  |
| EVM0022691 | LG11 | hypothetical protein CISIN_1g | not DE   | not DE   | not DE   | not DE  |
| EVM0019827 | LG11 | hypothetical protein CISIN_1g | not DE   | not DE   | not DE   | not DE  |
| EVM0006734 | LG11 | hypothetical protein CISIN_1g | -2.7448  | 0.031679 | not DE   | not DE  |
| EVM0016418 | LG11 | hypothetical protein CISIN_1g | not DE   | not DE   | not DE   | not DE  |
| EVM0021065 | LG11 | hypothetical protein CISIN_1g | not DE   | not DE   | not DE   | not DE  |
| EVM0016601 | LG11 | hypothetical protein CISIN_1g | not DE   | not DE   | not DE   | not DE  |
| EVM0001015 | LG11 | hypothetical protein CISIN_1g | not DE   | not DE   | not DE   | not DE  |
| EVM0010386 | LG11 | hypothetical protein CISIN_1g | not DE   | not DE   | not DE   | not DE  |
| EVM0007407 | LG11 | hypothetical protein CISIN_1g | not DE   | not DE   | not DE   | not DE  |
| EVM0023456 | LG11 | hypothetical protein CISIN_1g | not DE   | not DE   | not DE   | not DE  |
| EVM0004851 | LG11 | hypothetical protein CISIN_1g | not DE   | not DE   | not DE   | not DE  |
| EVM0013997 | LG11 | hypothetical protein CISIN_1g | not DE   | not DE   | not DE   | not DE  |
| EVM0014533 | LG11 | hypothetical protein CISIN_1g | not DE   | not DE   | not DE   | not DE  |
| EVM0004060 | LG11 | hypothetical protein CISIN_1g | -5.01163 | 6.71E-22 | -2.14149 | 0.00051 |
| EVM0014644 | LG11 | hypothetical protein CISIN_1g | not DE   | not DE   | not DE   | not DE  |
| EVM0000723 | LG11 | hypothetical protein CISIN_1g | not DE   | not DE   | not DE   | not DE  |
| EVM0017361 | LG11 | hypothetical protein CISIN_1g | not DE   | not DE   | not DE   | not DE  |
| EVM0003387 | LG11 | hypothetical protein CISIN_1g | 1.189521 | 3.55E-06 | not DE   | not DE  |
| EVM0010997 | LG11 | hypothetical protein CISIN_1g | not DE   | not DE   | 1.101048 | 0.0199  |
| EVM0022395 | LG11 | hypothetical protein CISIN_1g | 1.218139 | 3.22E-05 | 1.099408 | #####   |
| EVM0011607 | LG11 | hypothetical protein CISIN_1g | not DE   | not DE   | not DE   | not DE  |
| EVM0000139 | LG11 | hypothetical protein CISIN_1g | not DE   | not DE   | not DE   | not DE  |
| EVM0019312 | LG11 | hypothetical protein CISIN_1g | not DE   | not DE   | not DE   | not DE  |
| EVM0021834 | LG11 | hypothetical protein CISIN_1g | not DE   | not DE   | not DE   | not DE  |
| EVM0015721 | LG11 | hypothetical protein CISIN_1g | not DE   | not DE   | not DE   | not DE  |
| EVM0016346 | LG11 | hypothetical protein CISIN_1g | not DE   | not DE   | not DE   | not DE  |
| EVM0006273 | LG11 | hypothetical protein CISIN_1g | not DE   | not DE   | not DE   | not DE  |
| EVM0003560 | LG11 | hypothetical protein CISIN_1g | not DE   | not DE   | not DE   | not DE  |
| EVM0004541 | LG11 | hypothetical protein CISIN_1g | not DE   | not DE   | not DE   | not DE  |
| EVM0001080 | LG11 | hypothetical protein CISIN_1g | not DE   | not DE   | not DE   | not DE  |
| EVM0017568 | LG11 | hypothetical protein CISIN_1g | not DE   | not DE   | not DE   | not DE  |
| EVM0013583 | LG11 | hypothetical protein CISIN_1g | not DE   | not DE   | not DE   | not DE  |
| EVM0014995 | LG11 | hypothetical protein CISIN_1g | not DE   | not DE   | not DE   | not DE  |
| EVM0007775 | LG11 | hypothetical protein CISIN_1g | not DE   | not DE   | not DE   | not DE  |
| EVM0021603 | LG11 | hypothetical protein CISIN_1g | not DE   | not DE   | not DE   | not DE  |
| EVM0023578 | LG11 | hypothetical protein CISIN_1g | not DE   | not DE   | not DE   | not DE  |
| EVM0006837 | LG11 | hypothetical protein CISIN_1g | not DE   | not DE   | not DE   | not DE  |
| EVM0011854 | LG11 | hypothetical protein CISIN_1g | not DE   | not DE   | not DE   | not DE  |
| EVM0020075 | LG11 | hypothetical protein CISIN_1g | not DE   | not DE   | not DE   | not DE  |
| EVM0011183 | LG11 | hypothetical protein CISIN_1g | not DE   | not DE   | not DE   | not DE  |
| EVM0022851 | LG11 | hypothetical protein CISIN_1g | not DE   | not DE   | not DE   | not DE  |
| EVM0002666 | LG11 | hypothetical protein CISIN_1g | not DE   | not DE   | not DE   | not DE  |
| EVM0004682 | LG11 | hypothetical protein CISIN_1g | not DE   | not DE   | not DE   | not DE  |
| EVM0010151 | LG11 | hypothetical protein CISIN_1g | not DE   | not DE   | not DE   | not DE  |
| EVM0015393 | LG11 | hypothetical protein CISIN_1g | not DE   | not DE   | not DE   | not DE  |
| EVM0014764 | LG11 | hypothetical protein CISIN_1g | not DE   | not DE   | not DE   | not DE  |
| EVM0001003 | LG11 | hypothetical protein CISIN_1g | not DE   | not DE   | not DE   | not DE  |
| EVM0009920 | LG11 | hypothetical protein CISIN_1g | not DE   | not DE   | not DE   | not DE  |
| EVM0018976 | LG11 | hypothetical protein CISIN_1g | not DE   | not DE   | not DE   | not DE  |
| EVM0020489 | LG11 | hypothetical protein CISIN_1g | not DE   | not DE   | not DE   | not DE  |
| EVM0013525 | LG11 | hypothetical protein CISIN_1g | not DE   | not DE   | not DE   | not DE  |

|            |      |                               |          |          |          |         |
|------------|------|-------------------------------|----------|----------|----------|---------|
| EVM0007153 | LG11 | hypothetical protein CISIN_1g | -2.14191 | 2.32E-05 | not DE   | not DE  |
| EVM0015067 | LG11 | hypothetical protein CISIN_1g | not DE   | not DE   | not DE   | not DE  |
| EVM0016507 | LG11 | hypothetical protein CISIN_1g | not DE   | not DE   | not DE   | not DE  |
| EVM0005301 | LG11 | hypothetical protein CISIN_1g | not DE   | not DE   | not DE   | not DE  |
| EVM0000679 | LG11 | hypothetical protein CISIN_1g | not DE   | not DE   | not DE   | not DE  |
| EVM0018258 | LG11 | hypothetical protein CISIN_1g | not DE   | not DE   | not DE   | not DE  |
| EVM0017507 | LG11 | hypothetical protein CISIN_1g | not DE   | not DE   | not DE   | not DE  |
| EVM0009362 | LG11 | hypothetical protein CISIN_1g | not DE   | not DE   | not DE   | not DE  |
| EVM0016186 | LG11 | hypothetical protein CISIN_1g | not DE   | not DE   | not DE   | not DE  |
| EVM0019394 | LG11 | hypothetical protein CISIN_1g | not DE   | not DE   | 1.553588 | 0.01556 |
| EVM0007128 | LG11 | hypothetical protein CISIN_1g | not DE   | not DE   | not DE   | not DE  |
| EVM0019539 | LG11 | hypothetical protein CISIN_1g | not DE   | not DE   | not DE   | not DE  |
| EVM0022790 | LG11 | hypothetical protein CISIN_1g | not DE   | not DE   | not DE   | not DE  |
| EVM0004512 | LG11 | hypothetical protein CISIN_1g | not DE   | not DE   | not DE   | not DE  |
| EVM0021873 | LG11 | hypothetical protein CISIN_1g | not DE   | not DE   | not DE   | not DE  |
| EVM0000731 | LG11 | hypothetical protein CISIN_1g | not DE   | not DE   | not DE   | not DE  |
| EVM0014808 | LG11 | hypothetical protein CISIN_1g | not DE   | not DE   | not DE   | not DE  |
| EVM0014686 | LG11 | hypothetical protein CISIN_1g | not DE   | not DE   | not DE   | not DE  |
| EVM0011631 | LG11 | hypothetical protein CISIN_1g | not DE   | not DE   | not DE   | not DE  |
| EVM0023139 | LG11 | hypothetical protein CISIN_1g | not DE   | not DE   | not DE   | not DE  |
| EVM0013952 | LG11 | hypothetical protein CISIN_1g | 3.103832 | 0.001347 | not DE   | not DE  |
| EVM0015714 | LG11 | hypothetical protein CISIN_1g | not DE   | not DE   | not DE   | not DE  |
| EVM0023779 | LG11 | hypothetical protein CISIN_1g | not DE   | not DE   | not DE   | not DE  |
| EVM0017959 | LG11 | hypothetical protein CISIN_1g | not DE   | not DE   | not DE   | not DE  |
| EVM0013522 | LG11 | hypothetical protein CISIN_1g | not DE   | not DE   | not DE   | not DE  |
| EVM0007508 | LG11 | hypothetical protein CISIN_1g | 1.318966 | 0.005093 | 1.538362 | 0.0043  |
| EVM0011762 | LG11 | hypothetical protein CISIN_1g | not DE   | not DE   | not DE   | not DE  |
| EVM0006017 | LG11 | hypothetical protein CISIN_1g | not DE   | not DE   | -1.69936 | 0.00044 |
| EVM0011076 | LG11 | hypothetical protein CISIN_1g | not DE   | not DE   | not DE   | not DE  |
| EVM0002606 | LG11 | hypothetical protein CISIN_1g | not DE   | not DE   | not DE   | not DE  |
| EVM0005207 | LG11 | hypothetical protein CISIN_1g | not DE   | not DE   | not DE   | not DE  |
| EVM0018404 | LG11 | hypothetical protein CISIN_1g | not DE   | not DE   | not DE   | not DE  |
| EVM0024558 | LG11 | hypothetical protein CISIN_1g | not DE   | not DE   | not DE   | not DE  |
| EVM0017977 | LG11 | hypothetical protein CISIN_1g | not DE   | not DE   | -1.17191 | 0.0014  |
| EVM0002381 | LG11 | hypothetical protein CISIN_1g | not DE   | not DE   | not DE   | not DE  |
| EVM0006330 | LG11 | hypothetical protein CISIN_1g | 2.665118 | 0.016587 | not DE   | not DE  |
| EVM0007747 | LG11 | hypothetical protein CISIN_1g | not DE   | not DE   | not DE   | not DE  |
| EVM0016707 | LG11 | hypothetical protein CISIN_1g | not DE   | not DE   | not DE   | not DE  |
| EVM0019874 | LG11 | hypothetical protein CISIN_1g | not DE   | not DE   | not DE   | not DE  |
| EVM0011062 | LG11 | hypothetical protein CISIN_1g | not DE   | not DE   | not DE   | not DE  |
| EVM0014213 | LG11 | hypothetical protein CISIN_1g | not DE   | not DE   | not DE   | not DE  |
| EVM0012484 | LG11 | hypothetical protein CISIN_1g | not DE   | not DE   | not DE   | not DE  |
| EVM0013080 | LG11 | hypothetical protein CISIN_1g | not DE   | not DE   | not DE   | not DE  |
| EVM0016723 | LG11 | hypothetical protein CISIN_1g | not DE   | not DE   | not DE   | not DE  |
| EVM0022989 | LG11 | hypothetical protein CISIN_1g | not DE   | not DE   | not DE   | not DE  |
| EVM0006580 | LG11 | hypothetical protein CISIN_1g | not DE   | not DE   | not DE   | not DE  |
| EVM0008175 | LG11 | hypothetical protein CISIN_1g | not DE   | not DE   | not DE   | not DE  |
| EVM0023561 | LG11 | hypothetical protein EUGRSUZ_ | not DE   | not DE   | not DE   | not DE  |
| EVM0021821 | LG11 | hypothetical protein EUGRSUZ_ | not DE   | not DE   | not DE   | not DE  |
| EVM0015256 | LG11 | hypothetical protein F383_004 | not DE   | not DE   | not DE   | not DE  |
| EVM0004540 | LG11 | hypothetical protein F383_129 | not DE   | not DE   | not DE   | not DE  |
| EVM0018867 | LG11 | hypothetical protein F383_129 | not DE   | not DE   | not DE   | not DE  |
| EVM0010638 | LG11 | hypothetical protein F383_297 | not DE   | not DE   | not DE   | not DE  |
| EVM0016105 | LG11 | hypothetical protein JCGZ_003 | not DE   | not DE   | not DE   | not DE  |

|            |      |                               |          |          |          |         |
|------------|------|-------------------------------|----------|----------|----------|---------|
| EVM0003832 | LG11 | hypothetical protein JCGZ_024 | not DE   | not DE   | not DE   | not DE  |
| EVM0013119 | LG11 | hypothetical protein JCGZ_029 | not DE   | not DE   | not DE   | not DE  |
| EVM0016982 | LG11 | hypothetical protein JCGZ_029 | not DE   | not DE   | not DE   | not DE  |
| EVM0007680 | LG11 | hypothetical protein JCGZ_029 | 1.443791 | 0.002649 | not DE   | not DE  |
| EVM0006836 | LG11 | hypothetical protein JCGZ_033 | not DE   | not DE   | not DE   | not DE  |
| EVM0020299 | LG11 | hypothetical protein JCGZ_033 | not DE   | not DE   | not DE   | not DE  |
| EVM0021878 | LG11 | hypothetical protein JCGZ_033 | not DE   | not DE   | not DE   | not DE  |
| EVM0009800 | LG11 | hypothetical protein JCGZ_034 | not DE   | not DE   | not DE   | not DE  |
| EVM0007873 | LG11 | hypothetical protein JCGZ_039 | not DE   | not DE   | not DE   | not DE  |
| EVM0007875 | LG11 | hypothetical protein JCGZ_052 | not DE   | not DE   | not DE   | not DE  |
| EVM0002257 | LG11 | hypothetical protein JCGZ_053 | not DE   | not DE   | not DE   | not DE  |
| EVM0011173 | LG11 | hypothetical protein JCGZ_058 | not DE   | not DE   | not DE   | not DE  |
| EVM0023642 | LG11 | hypothetical protein JCGZ_058 | not DE   | not DE   | 2.112322 | 0.00497 |
| EVM0012349 | LG11 | hypothetical protein JCGZ_084 | not DE   | not DE   | not DE   | not DE  |
| EVM0013912 | LG11 | hypothetical protein JCGZ_084 | not DE   | not DE   | not DE   | not DE  |
| EVM0005808 | LG11 | hypothetical protein JCGZ_084 | not DE   | not DE   | not DE   | not DE  |
| EVM0003932 | LG11 | hypothetical protein JCGZ_110 | not DE   | not DE   | 1.630488 | 0.00015 |
| EVM0015838 | LG11 | hypothetical protein JCGZ_113 | not DE   | not DE   | not DE   | not DE  |
| EVM0010286 | LG11 | hypothetical protein JCGZ_113 | not DE   | not DE   | not DE   | not DE  |
| EVM0002716 | LG11 | hypothetical protein JCGZ_113 | not DE   | not DE   | not DE   | not DE  |
| EVM0011485 | LG11 | hypothetical protein JCGZ_113 | not DE   | not DE   | not DE   | not DE  |
| EVM0024656 | LG11 | hypothetical protein JCGZ_114 | not DE   | not DE   | 1.577017 | 0.00497 |
| EVM0012472 | LG11 | hypothetical protein JCGZ_114 | not DE   | not DE   | not DE   | not DE  |
| EVM0022304 | LG11 | hypothetical protein JCGZ_114 | not DE   | not DE   | not DE   | not DE  |
| EVM0016544 | LG11 | hypothetical protein JCGZ_114 | not DE   | not DE   | not DE   | not DE  |
| EVM0021137 | LG11 | hypothetical protein JCGZ_115 | not DE   | not DE   | not DE   | not DE  |
| EVM0011474 | LG11 | hypothetical protein JCGZ_115 | not DE   | not DE   | not DE   | not DE  |
| EVM0019617 | LG11 | hypothetical protein JCGZ_116 | not DE   | not DE   | not DE   | not DE  |
| EVM0019875 | LG11 | hypothetical protein JCGZ_116 | not DE   | not DE   | -1.18535 | #####   |
| EVM0005952 | LG11 | hypothetical protein JCGZ_116 | not DE   | not DE   | not DE   | not DE  |
| EVM0010567 | LG11 | hypothetical protein JCGZ_116 | not DE   | not DE   | not DE   | not DE  |
| EVM0014273 | LG11 | hypothetical protein JCGZ_116 | not DE   | not DE   | not DE   | not DE  |
| EVM0019708 | LG11 | hypothetical protein JCGZ_117 | not DE   | not DE   | not DE   | not DE  |
| EVM0017986 | LG11 | hypothetical protein JCGZ_117 | 2.433281 | 0.042    | not DE   | not DE  |
| EVM0024150 | LG11 | hypothetical protein JCGZ_118 | not DE   | not DE   | not DE   | not DE  |
| EVM0013820 | LG11 | hypothetical protein JCGZ_150 | not DE   | not DE   | not DE   | not DE  |
| EVM0011624 | LG11 | hypothetical protein JCGZ_174 | not DE   | not DE   | not DE   | not DE  |
| EVM0007000 | LG11 | hypothetical protein JCGZ_203 | not DE   | not DE   | not DE   | not DE  |
| EVM0015281 | LG11 | hypothetical protein JCGZ_204 | -2.71028 | 0.000202 | -2.86437 | #####   |
| EVM0019998 | LG11 | hypothetical protein JCGZ_205 | not DE   | not DE   | not DE   | not DE  |
| EVM0017045 | LG11 | hypothetical protein JCGZ_206 | not DE   | not DE   | not DE   | not DE  |
| EVM0010547 | LG11 | hypothetical protein JCGZ_207 | not DE   | not DE   | not DE   | not DE  |
| EVM0004728 | LG11 | hypothetical protein JCGZ_239 | not DE   | not DE   | not DE   | not DE  |
| EVM0023746 | LG11 | hypothetical protein JCGZ_270 | not DE   | not DE   | not DE   | not DE  |
| EVM0023260 | LG11 | hypothetical protein L484_002 | not DE   | not DE   | not DE   | not DE  |
| EVM0009251 | LG11 | hypothetical protein L484_005 | not DE   | not DE   | not DE   | not DE  |
| EVM0013461 | LG11 | hypothetical protein L484_018 | not DE   | not DE   | not DE   | not DE  |
| EVM0006027 | LG11 | hypothetical protein L484_022 | not DE   | not DE   | not DE   | not DE  |
| EVM0001835 | LG11 | hypothetical protein L484_024 | not DE   | not DE   | not DE   | not DE  |
| EVM0020951 | LG11 | hypothetical protein L484_024 | not DE   | not DE   | not DE   | not DE  |
| EVM0021768 | LG11 | hypothetical protein MIMGU_mg | not DE   | not DE   | not DE   | not DE  |
| EVM0024324 | LG11 | hypothetical protein MIMGU_mg | not DE   | not DE   | not DE   | not DE  |
| EVM0005259 | LG11 | hypothetical protein MIMGU_mg | not DE   | not DE   | not DE   | not DE  |
| EVM0002139 | LG11 | hypothetical protein MIMGU_mg | not DE   | not DE   | not DE   | not DE  |

|            |      |                               |          |          |          |         |
|------------|------|-------------------------------|----------|----------|----------|---------|
| EVM0016172 | LG11 | hypothetical protein OsJ_1705 | not DE   | not DE   | not DE   | not DE  |
| EVM0018992 | LG11 | hypothetical protein OsJ_2377 | not DE   | not DE   | not DE   | not DE  |
| EVM0016117 | LG11 | hypothetical protein PHAVU_00 | not DE   | not DE   | not DE   | not DE  |
| EVM0017027 | LG11 | hypothetical protein PHAVU_00 | not DE   | not DE   | 1.19457  | 0.00077 |
| EVM0003923 | LG11 | hypothetical protein PHAVU_01 | not DE   | not DE   | not DE   | not DE  |
| EVM0014936 | LG11 | hypothetical protein POPTR_00 | not DE   | not DE   | not DE   | not DE  |
| EVM0000474 | LG11 | hypothetical protein POPTR_00 | not DE   | not DE   | not DE   | not DE  |
| EVM0016373 | LG11 | hypothetical protein POPTR_00 | not DE   | not DE   | not DE   | not DE  |
| EVM0017194 | LG11 | hypothetical protein POPTR_00 | not DE   | not DE   | not DE   | not DE  |
| EVM0012137 | LG11 | hypothetical protein POPTR_00 | not DE   | not DE   | 1.316481 | 0.02708 |
| EVM0001067 | LG11 | hypothetical protein POPTR_00 | not DE   | not DE   | not DE   | not DE  |
| EVM0007125 | LG11 | hypothetical protein POPTR_00 | not DE   | not DE   | not DE   | not DE  |
| EVM0010110 | LG11 | hypothetical protein POPTR_00 | not DE   | not DE   | not DE   | not DE  |
| EVM0021325 | LG11 | hypothetical protein POPTR_00 | not DE   | not DE   | not DE   | not DE  |
| EVM0006291 | LG11 | hypothetical protein POPTR_00 | not DE   | not DE   | not DE   | not DE  |
| EVM0005831 | LG11 | hypothetical protein POPTR_00 | not DE   | not DE   | not DE   | not DE  |
| EVM0021376 | LG11 | hypothetical protein POPTR_00 | not DE   | not DE   | not DE   | not DE  |
| EVM0006250 | LG11 | hypothetical protein POPTR_00 | not DE   | not DE   | not DE   | not DE  |
| EVM0004412 | LG11 | hypothetical protein POPTR_00 | not DE   | not DE   | not DE   | not DE  |
| EVM0013475 | LG11 | hypothetical protein POPTR_00 | not DE   | not DE   | not DE   | not DE  |
| EVM0021052 | LG11 | hypothetical protein POPTR_00 | not DE   | not DE   | not DE   | not DE  |
| EVM0015949 | LG11 | hypothetical protein POPTR_00 | not DE   | not DE   | not DE   | not DE  |
| EVM0001402 | LG11 | hypothetical protein POPTR_00 | not DE   | not DE   | not DE   | not DE  |
| EVM0013580 | LG11 | hypothetical protein POPTR_00 | not DE   | not DE   | not DE   | not DE  |
| EVM0022513 | LG11 | hypothetical protein POPTR_00 | not DE   | not DE   | not DE   | not DE  |
| EVM0002094 | LG11 | hypothetical protein POPTR_00 | -2.33301 | 0.019958 | -3.98351 | #####   |
| EVM0021703 | LG11 | hypothetical protein POPTR_00 | not DE   | not DE   | not DE   | not DE  |
| EVM0002425 | LG11 | hypothetical protein POPTR_00 | not DE   | not DE   | not DE   | not DE  |
| EVM0008067 | LG11 | hypothetical protein POPTR_00 | not DE   | not DE   | not DE   | not DE  |
| EVM0003935 | LG11 | hypothetical protein POPTR_00 | not DE   | not DE   | not DE   | not DE  |
| EVM0011573 | LG11 | hypothetical protein POPTR_00 | not DE   | not DE   | not DE   | not DE  |
| EVM0021422 | LG11 | hypothetical protein POPTR_00 | not DE   | not DE   | not DE   | not DE  |
| EVM0024358 | LG11 | hypothetical protein POPTR_00 | not DE   | not DE   | not DE   | not DE  |
| EVM0024409 | LG11 | hypothetical protein POPTR_00 | not DE   | not DE   | not DE   | not DE  |
| EVM0020649 | LG11 | hypothetical protein POPTR_00 | not DE   | not DE   | not DE   | not DE  |
| EVM0003747 | LG11 | hypothetical protein POPTR_00 | not DE   | not DE   | not DE   | not DE  |
| EVM0020712 | LG11 | hypothetical protein POPTR_00 | 1.884586 | 3.86E-05 | 2.218862 | #####   |
| EVM0005998 | LG11 | hypothetical protein PRUPE_pp | not DE   | not DE   | not DE   | not DE  |
| EVM0024510 | LG11 | hypothetical protein PRUPE_pp | not DE   | not DE   | not DE   | not DE  |
| EVM0017624 | LG11 | hypothetical protein PRUPE_pp | not DE   | not DE   | not DE   | not DE  |
| EVM0010305 | LG11 | hypothetical protein PRUPE_pp | not DE   | not DE   | not DE   | not DE  |
| EVM0006504 | LG11 | hypothetical protein PRUPE_pp | not DE   | not DE   | not DE   | not DE  |
| EVM0002534 | LG11 | hypothetical protein PRUPE_pp | not DE   | not DE   | not DE   | not DE  |
| EVM0005542 | LG11 | hypothetical protein PRUPE_pp | not DE   | not DE   | not DE   | not DE  |
| EVM0015531 | LG11 | hypothetical protein PRUPE_pp | not DE   | not DE   | not DE   | not DE  |
| EVM0008619 | LG11 | hypothetical protein PRUPE_pp | not DE   | not DE   | not DE   | not DE  |
| EVM0003323 | LG11 | hypothetical protein PRUPE_pp | not DE   | not DE   | not DE   | not DE  |
| EVM0009235 | LG11 | hypothetical protein PRUPE_pp | not DE   | not DE   | not DE   | not DE  |
| EVM0024404 | LG11 | hypothetical protein PRUPE_pp | not DE   | not DE   | not DE   | not DE  |
| EVM0023389 | LG11 | hypothetical protein PRUPE_pp | not DE   | not DE   | not DE   | not DE  |
| EVM0006406 | LG11 | hypothetical protein PRUPE_pp | not DE   | not DE   | not DE   | not DE  |
| EVM0021401 | LG11 | hypothetical protein PRUPE_pp | not DE   | not DE   | not DE   | not DE  |
| EVM0011328 | LG11 | hypothetical protein PRUPE_pp | not DE   | not DE   | not DE   | not DE  |
| EVM0014942 | LG11 | hypothetical protein PRUPE_pp | not DE   | not DE   | not DE   | not DE  |



|            |      |                               |          |          |          |         |
|------------|------|-------------------------------|----------|----------|----------|---------|
| EVM0004362 | LG11 | hypothetical protein PRUPE_pp | not DE   | not DE   | not DE   | not DE  |
| EVM0015625 | LG11 | hypothetical protein PRUPE_pp | not DE   | not DE   | 1.019853 | #####   |
| EVM0013928 | LG11 | hypothetical protein PRUPE_pp | not DE   | not DE   | not DE   | not DE  |
| EVM0020129 | LG11 | hypothetical protein PRUPE_pp | not DE   | not DE   | not DE   | not DE  |
| EVM0001692 | LG11 | hypothetical protein PRUPE_pp | not DE   | not DE   | not DE   | not DE  |
| EVM0001745 | LG11 | hypothetical protein PRUPE_pp | not DE   | not DE   | not DE   | not DE  |
| EVM0008386 | LG11 | hypothetical protein PRUPE_pp | not DE   | not DE   | not DE   | not DE  |
| EVM0001602 | LG11 | hypothetical protein PRUPE_pp | not DE   | not DE   | not DE   | not DE  |
| EVM0005136 | LG11 | hypothetical protein PRUPE_pp | not DE   | not DE   | not DE   | not DE  |
| EVM0021327 | LG11 | hypothetical protein PRUPE_pp | not DE   | not DE   | not DE   | not DE  |
| EVM0021503 | LG11 | hypothetical protein PRUPE_pp | not DE   | not DE   | not DE   | not DE  |
| EVM0022999 | LG11 | hypothetical protein RCOM_115 | not DE   | not DE   | not DE   | not DE  |
| EVM0009634 | LG11 | hypothetical protein RCOM_161 | not DE   | not DE   | not DE   | not DE  |
| EVM0002500 | LG11 | hypothetical protein RCOM_169 | not DE   | not DE   | not DE   | not DE  |
| EVM0013150 | LG11 | hypothetical protein VITISV_C | not DE   | not DE   | not DE   | not DE  |
| EVM0008554 | LG11 | hypothetical protein VITISV_C | not DE   | not DE   | not DE   | not DE  |
| EVM0006126 | LG11 | hypothetical protein VITISV_C | not DE   | not DE   | not DE   | not DE  |
| EVM0008877 | LG11 | hypothetical protein VITISV_C | not DE   | not DE   | not DE   | not DE  |
| EVM0005621 | LG11 | hypothetical protein VITISV_C | not DE   | not DE   | not DE   | not DE  |
| EVM0022189 | LG11 | hypothetical protein VITISV_C | not DE   | not DE   | 1.199497 | 0.01658 |
| EVM0005251 | LG11 | hypothetical protein VITISV_C | not DE   | not DE   | not DE   | not DE  |
| EVM0002100 | LG11 | hypothetical protein VITISV_C | not DE   | not DE   | not DE   | not DE  |
| EVM0010553 | LG11 | hypothetical protein VITISV_C | not DE   | not DE   | not DE   | not DE  |
| EVM0011430 | LG11 | hypothetical protein VITISV_C | not DE   | not DE   | not DE   | not DE  |
| EVM0022759 | LG11 | hypothetical protein glysoja_ | not DE   | not DE   | not DE   | not DE  |
| EVM0009857 | LG11 | integrase                     | not DE   | not DE   | not DE   | not DE  |
| EVM0010154 | LG11 | iron-sulfur cluster scaffold  | not DE   | not DE   | 1.10339  | #####   |
| EVM0015356 | LG11 | laccase family protein        | not DE   | not DE   | not DE   | not DE  |
| EVM0017129 | LG11 | longevity assurance factor, p | not DE   | not DE   | not DE   | not DE  |
| EVM0015640 | LG11 | low molecular weight heat sho | -5.97454 | 4.38E-11 | -3.34849 | #####   |
| EVM0000379 | LG11 | peptidyl-prolyl cis-trans isc | not DE   | not DE   | not DE   | not DE  |
| EVM0019872 | LG11 | phospholipase D beta          | not DE   | not DE   | not DE   | not DE  |
| EVM0006434 | LG11 | photosystem II protein D2     | -1.42203 | 0.015685 | not DE   | not DE  |
| EVM0016945 | LG11 | plant uncoupling mitochondria | not DE   | not DE   | not DE   | not DE  |
| EVM0012184 | LG11 | potassium channel SKOR-like   | not DE   | not DE   | not DE   | not DE  |
| EVM0000481 | LG11 | putative hexose transporter   | not DE   | not DE   | not DE   | not DE  |
| EVM0003993 | LG11 | putative hexose transporter   | not DE   | not DE   | not DE   | not DE  |
| EVM0012172 | LG11 | putative hexose transporter   | not DE   | not DE   | not DE   | not DE  |
| EVM0004934 | LG11 | remorin-5 protein             | not DE   | not DE   | not DE   | not DE  |
| EVM0022332 | LG11 | reticulon family protein      | not DE   | not DE   | not DE   | not DE  |
| EVM0012881 | LG11 | retrotransposon protein, puta | not DE   | not DE   | not DE   | not DE  |
| EVM0005586 | LG11 | rhomboid family protein       | not DE   | not DE   | not DE   | not DE  |
| EVM0019001 | LG11 | rps18 gene product (chloropl  | not DE   | not DE   | not DE   | not DE  |
| EVM0016862 | LG11 | scarecrow-like protein 28     | not DE   | not DE   | not DE   | not DE  |
| EVM0007391 | LG11 | senescence-associated family  | -1.28025 | 0.021167 | not DE   | not DE  |
| EVM0016489 | LG11 | talisin                       | not DE   | not DE   | not DE   | not DE  |
| EVM0005040 | LG11 | timing of CAB expression 1    | 1.759693 | 5.19E-08 | not DE   | not DE  |
| EVM0007031 | LG11 | tonoplast intrinsic protein,  | not DE   | not DE   | not DE   | not DE  |
| EVM0011158 | LG11 | tumor-related protein         | not DE   | not DE   | not DE   | not DE  |
| EVM0011901 | LG11 | tumor-related protein         | 4.441677 | 0.041188 | not DE   | not DE  |
| EVM0009152 | LG11 | ubiquitin-conjugating enzyme  | not DE   | not DE   | not DE   | not DE  |
| EVM0012799 | LG11 | uncharacterized protein       | not DE   | not DE   | not DE   | not DE  |
| EVM0021572 | LG11 | uncharacterized protein LOC10 | not DE   | not DE   | not DE   | not DE  |
| EVM0015157 | LG11 | uncharacterized protein LOC10 | not DE   | not DE   | not DE   | not DE  |

|            |      |                               |          |          |          |         |
|------------|------|-------------------------------|----------|----------|----------|---------|
| EVM0000063 | LG11 | unknown protein               | not DE   | not DE   | not DE   | not DE  |
| EVM0001479 | LG11 | unknown protein               | not DE   | not DE   | not DE   | not DE  |
| EVM0002689 | LG11 | unknown protein               | not DE   | not DE   | not DE   | not DE  |
| EVM0003433 | LG11 | unknown protein               | not DE   | not DE   | not DE   | not DE  |
| EVM0004161 | LG11 | unknown protein               | not DE   | not DE   | not DE   | not DE  |
| EVM0009492 | LG11 | unknown protein               | not DE   | not DE   | not DE   | not DE  |
| EVM0011092 | LG11 | unknown protein               | not DE   | not DE   | 1.968367 | 0.00031 |
| EVM0011222 | LG11 | unknown protein               | not DE   | not DE   | not DE   | not DE  |
| EVM0012950 | LG11 | unknown protein               | not DE   | not DE   | not DE   | not DE  |
| EVM0013788 | LG11 | unknown protein               | not DE   | not DE   | not DE   | not DE  |
| EVM0016192 | LG11 | unknown protein               | not DE   | not DE   | not DE   | not DE  |
| EVM0017758 | LG11 | unknown protein               | not DE   | not DE   | not DE   | not DE  |
| EVM0017813 | LG11 | unknown protein               | not DE   | not DE   | not DE   | not DE  |
| EVM0018535 | LG11 | unknown protein               | not DE   | not DE   | not DE   | not DE  |
| EVM0018585 | LG11 | unknown protein               | not DE   | not DE   | not DE   | not DE  |
| EVM0018832 | LG11 | unknown protein               | not DE   | not DE   | not DE   | not DE  |
| EVM0018968 | LG11 | unknown protein               | not DE   | not DE   | not DE   | not DE  |
| EVM0019681 | LG11 | unknown protein               | not DE   | not DE   | not DE   | not DE  |
| EVM0024373 | LG11 | unknown protein               | -1.25559 | 0.019691 | not DE   | not DE  |
| EVM0000315 | LG11 | unnamed protein product       | not DE   | not DE   | not DE   | not DE  |
| EVM0001989 | LG11 | unnamed protein product       | not DE   | not DE   | not DE   | not DE  |
| EVM0002409 | LG11 | unnamed protein product       | not DE   | not DE   | not DE   | not DE  |
| EVM0003204 | LG11 | unnamed protein product       | not DE   | not DE   | not DE   | not DE  |
| EVM0005210 | LG11 | unnamed protein product       | not DE   | not DE   | not DE   | not DE  |
| EVM0005633 | LG11 | unnamed protein product       | not DE   | not DE   | not DE   | not DE  |
| EVM0005937 | LG11 | unnamed protein product       | 2.043672 | 0.001485 | not DE   | not DE  |
| EVM0006059 | LG11 | unnamed protein product       | not DE   | not DE   | not DE   | not DE  |
| EVM0006420 | LG11 | unnamed protein product       | not DE   | not DE   | not DE   | not DE  |
| EVM0007796 | LG11 | unnamed protein product       | 2.040985 | 2.26E-06 | 1.158292 | 0.0179  |
| EVM0011789 | LG11 | unnamed protein product       | not DE   | not DE   | 1.311503 | #####   |
| EVM0013822 | LG11 | unnamed protein product       | not DE   | not DE   | -1.14736 | #####   |
| EVM0015366 | LG11 | unnamed protein product       | not DE   | not DE   | not DE   | not DE  |
| EVM0015638 | LG11 | unnamed protein product       | not DE   | not DE   | not DE   | not DE  |
| EVM0015839 | LG11 | unnamed protein product       | not DE   | not DE   | not DE   | not DE  |
| EVM0016784 | LG11 | unnamed protein product       | not DE   | not DE   | not DE   | not DE  |
| EVM0016836 | LG11 | unnamed protein product       | not DE   | not DE   | not DE   | not DE  |
| EVM0017845 | LG11 | unnamed protein product       | not DE   | not DE   | not DE   | not DE  |
| EVM0019640 | LG11 | unnamed protein product       | not DE   | not DE   | not DE   | not DE  |
| EVM0020076 | LG11 | unnamed protein product       | not DE   | not DE   | not DE   | not DE  |
| EVM0021071 | LG11 | unnamed protein product       | not DE   | not DE   | not DE   | not DE  |
| EVM0022833 | LG11 | unnamed protein product       | 2.647841 | 6.87E-05 | not DE   | not DE  |
| EVM0023453 | LG11 | unnamed protein product       | not DE   | not DE   | not DE   | not DE  |
| EVM0024153 | LG11 | unnamed protein product       | not DE   | not DE   | not DE   | not DE  |
| EVM0001609 | LG11 | vegetative storage protein    | not DE   | not DE   | -5.86391 | 0.03983 |
| EVM0002484 | LG11 | vegetative storage protein    | not DE   | not DE   | not DE   | not DE  |
| EVM0009884 | LG11 | vegetative storage protein    | not DE   | not DE   | not DE   | not DE  |
| EVM0016013 | LG11 | vegetative storage protein    | not DE   | not DE   | not DE   | not DE  |
| EVM0001375 | LG11 | zinc finger protein, putative | not DE   | not DE   | not DE   | not DE  |
| EVM0024486 | LG12 | 15.7 kDa heat shock protein,  | not DE   | not DE   | not DE   | not DE  |
| EVM0018770 | LG12 | 18.1 kDa class I heat shock   | -2.63825 | 0.037613 | not DE   | not DE  |
| EVM0009161 | LG12 | 21 kDa protein-like           | not DE   | not DE   | not DE   | not DE  |
| EVM0009201 | LG12 | 21 kDa protein-like           | not DE   | not DE   | 2.482684 | #####   |
| EVM0006044 | LG12 | 3-oxoacyl-[acyl-carrier-prot  | not DE   | not DE   | not DE   | not DE  |
| EVM0023310 | LG12 | 3-oxoacyl-[acyl-carrier-prot  | not DE   | not DE   | not DE   | not DE  |

|            |      |                               |          |          |          |         |
|------------|------|-------------------------------|----------|----------|----------|---------|
| EVM0009806 | LG12 | 4-hydroxy-tetrahydrodipicolin | not DE   | not DE   | not DE   | not DE  |
| EVM0019202 | LG12 | 40S ribosomal protein S2-3-l  | not DE   | not DE   | not DE   | not DE  |
| EVM0015310 | LG12 | 5-aminolevulinate synthase,   | 3.139324 | 0.00996  | not DE   | not DE  |
| EVM0000873 | LG12 | 50S ribosomal protein 5, chl  | not DE   | not DE   | 1.006619 | 0.00484 |
| EVM0005942 | LG12 | 60S ribosomal export protein  | not DE   | not DE   | not DE   | not DE  |
| EVM0002402 | LG12 | 65-kDa microtubule-associate  | not DE   | not DE   | not DE   | not DE  |
| EVM0006933 | LG12 | 7-ethoxycoumarin O-deethylas  | not DE   | not DE   | not DE   | not DE  |
| EVM0017611 | LG12 | ABC transporter B family mem  | not DE   | not DE   | not DE   | not DE  |
| EVM0022501 | LG12 | ABC transporter C family mem  | 3.138251 | 2.48E-06 | not DE   | not DE  |
| EVM0019161 | LG12 | ABC transporter G family mem  | not DE   | not DE   | not DE   | not DE  |
| EVM0003937 | LG12 | ADP-ribosylation factor-rela  | not DE   | not DE   | not DE   | not DE  |
| EVM0005796 | LG12 | ADP-ribosylation factor-rela  | not DE   | not DE   | not DE   | not DE  |
| EVM0000919 | LG12 | ALA-interacting subunit 3     | not DE   | not DE   | not DE   | not DE  |
| EVM0019096 | LG12 | ALA-interacting subunit 3-li  | not DE   | not DE   | not DE   | not DE  |
| EVM0010938 | LG12 | APO protein 3, mitochondrial  | not DE   | not DE   | not DE   | not DE  |
| EVM0020190 | LG12 | ATP-dependent zinc metallopr  | not DE   | not DE   | not DE   | not DE  |
| EVM0014123 | LG12 | B3 domain-containing protein  | not DE   | not DE   | not DE   | not DE  |
| EVM0024361 | LG12 | BAG family molecular chapero  | not DE   | not DE   | not DE   | not DE  |
| EVM0014610 | LG12 | CCR4-NOT transcription compl  | not DE   | not DE   | not DE   | not DE  |
| EVM0023113 | LG12 | CCR4-NOT transcription compl  | not DE   | not DE   | not DE   | not DE  |
| EVM0023039 | LG12 | DELLA protein GAI-like        | not DE   | not DE   | not DE   | not DE  |
| EVM0006847 | LG12 | DELLA protein RGL1-like       | -3.176   | 0.012161 | not DE   | not DE  |
| EVM0017801 | LG12 | DNA gyrase subunit B, chloro  | not DE   | not DE   | not DE   | not DE  |
| EVM0001293 | LG12 | DNA helicase IN080-like       | not DE   | not DE   | not DE   | not DE  |
| EVM0012902 | LG12 | E3 ubiquitin protein ligase   | not DE   | not DE   | not DE   | not DE  |
| EVM0019850 | LG12 | E3 ubiquitin-protein ligase   | not DE   | not DE   | not DE   | not DE  |
| EVM0011734 | LG12 | E3 ubiquitin-protein ligase   | not DE   | not DE   | not DE   | not DE  |
| EVM0023672 | LG12 | E3 ubiquitin-protein ligase   | not DE   | not DE   | not DE   | not DE  |
| EVM0006319 | LG12 | F-box protein At5g51380-like  | not DE   | not DE   | not DE   | not DE  |
| EVM0014887 | LG12 | F-box protein At5g51380-like  | not DE   | not DE   | not DE   | not DE  |
| EVM0017654 | LG12 | F-box protein At5g52880-like  | not DE   | not DE   | not DE   | not DE  |
| EVM0007271 | LG12 | G-type lectin S-receptor-lik  | not DE   | not DE   | not DE   | not DE  |
| EVM0021674 | LG12 | G-type lectin S-receptor-lik  | not DE   | not DE   | not DE   | not DE  |
| EVM0016700 | LG12 | G2/mitotic-specific cyclin S  | not DE   | not DE   | 2.810093 | 0.01052 |
| EVM0003798 | LG12 | GDP-mannose transporter GONS  | not DE   | not DE   | not DE   | not DE  |
| EVM0009740 | LG12 | GDP-mannose transporter GONS  | not DE   | not DE   | not DE   | not DE  |
| EVM0021806 | LG12 | L-galactono-1,4-lactone dehy  | not DE   | not DE   | not DE   | not DE  |
| EVM0014163 | LG12 | LRR receptor-like serine/thr  | not DE   | not DE   | not DE   | not DE  |
| EVM0023169 | LG12 | MADS-box transcription facto  | not DE   | not DE   | not DE   | not DE  |
| EVM0003228 | LG12 | MADS-box transcription facto  | not DE   | not DE   | not DE   | not DE  |
| EVM0003250 | LG12 | MATE efflux family protein 7  | not DE   | not DE   | not DE   | not DE  |
| EVM0019197 | LG12 | MATE efflux family protein L  | not DE   | not DE   | not DE   | not DE  |
| EVM0002053 | LG12 | NAC domain-containing protei  | not DE   | not DE   | not DE   | not DE  |
| EVM0001842 | LG12 | NADH dehydrogenase            | not DE   | not DE   | not DE   | not DE  |
| EVM0020809 | LG12 | NO-associated protein 1, chl  | not DE   | not DE   | not DE   | not DE  |
| EVM0017536 | LG12 | OTU domain-containing protei  | -2.23077 | 8.55E-06 | not DE   | not DE  |
| EVM0023790 | LG12 | PHD finger protein MALE MEI   | not DE   | not DE   | not DE   | not DE  |
| EVM0001096 | LG12 | PTI1-like tyrosine-protein k  | not DE   | not DE   | not DE   | not DE  |
| EVM0010446 | LG12 | QWRF motif-containing protei  | not DE   | not DE   | not DE   | not DE  |
| EVM0010356 | LG12 | RNA-binding protein 5-like i  | not DE   | not DE   | not DE   | not DE  |
| EVM0000836 | LG12 | RNA-dependent RNA polymerase  | not DE   | not DE   | not DE   | not DE  |
| EVM0009215 | LG12 | RNA-dependent RNA polymerase  | not DE   | not DE   | not DE   | not DE  |
| EVM0014576 | LG12 | RNA-dependent RNA polymerase  | not DE   | not DE   | not DE   | not DE  |
| EVM0002658 | LG12 | RRP12-like protein-like isof  | not DE   | not DE   | not DE   | not DE  |

|            |      |                               |          |          |          |         |
|------------|------|-------------------------------|----------|----------|----------|---------|
| EVM0011912 | LG12 | S-type anion channel SLAH3-1  | not DE   | not DE   | not DE   | not DE  |
| EVM0012501 | LG12 | SKP1-like protein 21-like     | not DE   | not DE   | not DE   | not DE  |
| EVM0005765 | LG12 | UDP-glycosyltransferase 88A1  | not DE   | not DE   | -1.5661  | 0.00013 |
| EVM0015976 | LG12 | UDP-glycosyltransferase 88A1  | -1.6554  | 0.003631 | not DE   | not DE  |
| EVM0002276 | LG12 | UPF0481 protein At3g47200-li  | not DE   | not DE   | not DE   | not DE  |
| EVM0010140 | LG12 | UPF0481 protein At3g47200-li  | not DE   | not DE   | not DE   | not DE  |
| EVM0014724 | LG12 | UPF0481 protein At3g47200-li  | -2.03196 | 0.031659 | not DE   | not DE  |
| EVM0007418 | LG12 | UPF0678 fatty acid-binding p  | not DE   | not DE   | 1.365342 | #####   |
| EVM0003953 | LG12 | WAT1-related protein At5g070  | not DE   | not DE   | -1.30043 | 0.00869 |
| EVM0013309 | LG12 | WD repeat-containing protein  | not DE   | not DE   | not DE   | not DE  |
| EVM0023447 | LG12 | WD repeat-containing protein  | not DE   | not DE   | not DE   | not DE  |
| EVM0002467 | LG12 | Werner Syndrome-like exonucl  | not DE   | not DE   | not DE   | not DE  |
| EVM0001290 | LG12 | Werner Syndrome-like exonucl  | not DE   | not DE   | not DE   | not DE  |
| EVM0021745 | LG12 | acetylornithine aminotransfe  | not DE   | not DE   | not DE   | not DE  |
| EVM0020572 | LG12 | actin-depolymerizing factor   | not DE   | not DE   | not DE   | not DE  |
| EVM0020279 | LG12 | agamous-like MADS-box protei  | not DE   | not DE   | not DE   | not DE  |
| EVM0014503 | LG12 | agamous-like MADS-box protei  | not DE   | not DE   | not DE   | not DE  |
| EVM0021541 | LG12 | aldose 1-epimerase-like       | not DE   | not DE   | not DE   | not DE  |
| EVM0024443 | LG12 | alpha-L-fucosidase 1-like     | -3.3849  | 0.000496 | not DE   | not DE  |
| EVM0013149 | LG12 | alpha-ketoglutarate-dependen  | not DE   | not DE   | not DE   | not DE  |
| EVM0019915 | LG12 | alpha/beta hydrolase domain   | not DE   | not DE   | not DE   | not DE  |
| EVM0023047 | LG12 | apurinic endonuclease-redox   | not DE   | not DE   | not DE   | not DE  |
| EVM0003435 | LG12 | armadillo repeat-containing   | not DE   | not DE   | not DE   | not DE  |
| EVM0019995 | LG12 | aspartic proteinase nepenthe  | not DE   | not DE   | not DE   | not DE  |
| EVM0006907 | LG12 | autophagy protein 5-like isc  | not DE   | not DE   | not DE   | not DE  |
| EVM0020250 | LG12 | autophagy protein 5-like isc  | not DE   | not DE   | not DE   | not DE  |
| EVM0023211 | LG12 | beta-glucosidase 44-like      | not DE   | not DE   | not DE   | not DE  |
| EVM0015249 | LG12 | bidirectional sugar transport | not DE   | not DE   | not DE   | not DE  |
| EVM0016127 | LG12 | bidirectional sugar transport | not DE   | not DE   | not DE   | not DE  |
| EVM0024487 | LG12 | bidirectional sugar transport | not DE   | not DE   | not DE   | not DE  |
| EVM0017985 | LG12 | calcium-transporting ATPase   | not DE   | not DE   | not DE   | not DE  |
| EVM0015783 | LG12 | carboxylesterase 1-like       | not DE   | not DE   | not DE   | not DE  |
| EVM0018558 | LG12 | carboxylesterase 1-like       | not DE   | not DE   | not DE   | not DE  |
| EVM0004209 | LG12 | casbene synthase, chloroplas  | not DE   | not DE   | not DE   | not DE  |
| EVM0021527 | LG12 | casbene synthase, chloroplas  | not DE   | not DE   | not DE   | not DE  |
| EVM0024158 | LG12 | cell number regulator 6-like  | not DE   | not DE   | not DE   | not DE  |
| EVM0001041 | LG12 | centromere-associated protei  | not DE   | not DE   | not DE   | not DE  |
| EVM0008704 | LG12 | chaperone protein dnaJ 6-lik  | not DE   | not DE   | 1.222872 | 0.0065  |
| EVM0006109 | LG12 | chloroplastic group IIA intr  | not DE   | not DE   | not DE   | not DE  |
| EVM0010792 | LG12 | chloroplastic group IIB intr  | not DE   | not DE   | not DE   | not DE  |
| EVM0005515 | LG12 | cleavage and polyadenylation  | not DE   | not DE   | not DE   | not DE  |
| EVM0005685 | LG12 | condensin complex subunit 3-  | not DE   | not DE   | not DE   | not DE  |
| EVM0001292 | LG12 | conserved oligomeric Golgi c  | not DE   | not DE   | not DE   | not DE  |
| EVM0008989 | LG12 | cyclic nucleotide-gated ion   | not DE   | not DE   | not DE   | not DE  |
| EVM0008151 | LG12 | cyclin-U4-1-like              | not DE   | not DE   | not DE   | not DE  |
| EVM0011611 | LG12 | cyclin-dependent kinase F-4   | not DE   | not DE   | not DE   | not DE  |
| EVM0012829 | LG12 | cysteine proteinase inhibitor | not DE   | not DE   | not DE   | not DE  |
| EVM0011227 | LG12 | cysteine-rich receptor-like   | not DE   | not DE   | not DE   | not DE  |
| EVM0013942 | LG12 | cysteine-rich repeat secret   | not DE   | not DE   | not DE   | not DE  |
| EVM0001133 | LG12 | cytochrome P450 93A1-like     | -2.41351 | 5.02E-05 | -1.26262 | #####   |
| EVM0010164 | LG12 | cytochrome P450 93A1-like     | not DE   | not DE   | not DE   | not DE  |
| EVM0005697 | LG12 | cytochrome P450 93A3-like     | not DE   | not DE   | not DE   | not DE  |
| EVM0002150 | LG12 | cytochrome P450 98A2-like     | not DE   | not DE   | not DE   | not DE  |
| EVM0023137 | LG12 | delta(7)-sterol-C5(6)-desatu  | not DE   | not DE   | not DE   | not DE  |

|            |      |                              |          |          |          |         |
|------------|------|------------------------------|----------|----------|----------|---------|
| EVM0007038 | LG12 | dentin sialophosphoprotein-1 | not DE   | not DE   | not DE   | not DE  |
| EVM0010194 | LG12 | discs large homolog 1-like p | not DE   | not DE   | not DE   | not DE  |
| EVM0022159 | LG12 | double-stranded RNA-binding  | not DE   | not DE   | not DE   | not DE  |
| EVM0007340 | LG12 | ell-associated factor Eaf-li | not DE   | not DE   | not DE   | not DE  |
| EVM0021890 | LG12 | elongator complex protein 5- | not DE   | not DE   | not DE   | not DE  |
| EVM0012499 | LG12 | endoglucanase 8-like         | not DE   | not DE   | not DE   | not DE  |
| EVM0019836 | LG12 | enolase                      | 1.56488  | 0.02615  | 1.92481  | #####   |
| EVM0012901 | LG12 | ethylene-responsive transcri | not DE   | not DE   | not DE   | not DE  |
| EVM0000116 | LG12 | eukaryotic translation initi | not DE   | not DE   | not DE   | not DE  |
| EVM0000093 | LG12 | exosome complex component RR | not DE   | not DE   | not DE   | not DE  |
| EVM0003347 | LG12 | expansin-B15-like            | not DE   | not DE   | not DE   | not DE  |
| EVM0009570 | LG12 | expansin-B15-like            | not DE   | not DE   | not DE   | not DE  |
| EVM0018351 | LG12 | expansin-B15-like            | not DE   | not DE   | not DE   | not DE  |
| EVM0022339 | LG12 | expansin-B15-like            | not DE   | not DE   | not DE   | not DE  |
| EVM0001639 | LG12 | ferric reduction oxidase 4-l | not DE   | not DE   | not DE   | not DE  |
| EVM0017463 | LG12 | flavonoid 3&apos;-monooxygen | not DE   | not DE   | not DE   | not DE  |
| EVM0012071 | LG12 | folylpolyglutamate synthase, | not DE   | not DE   | not DE   | not DE  |
| EVM0004399 | LG12 | folylpolyglutamate synthase- | not DE   | not DE   | not DE   | not DE  |
| EVM0003284 | LG12 | genome polyprotein-like      | not DE   | not DE   | not DE   | not DE  |
| EVM0009864 | LG12 | geranylgeranyl pyrophosphate | not DE   | not DE   | not DE   | not DE  |
| EVM0019232 | LG12 | geranylgeranyl pyrophosphate | not DE   | not DE   | not DE   | not DE  |
| EVM0014147 | LG12 | gibberellin 20 oxidase 1-lik | not DE   | not DE   | not DE   | not DE  |
| EVM0019902 | LG12 | glutamate synthase 1         | not DE   | not DE   | not DE   | not DE  |
| EVM0001198 | LG12 | glutaminy-peptide cyclotran  | not DE   | not DE   | not DE   | not DE  |
| EVM0022361 | LG12 | glutathione S-transferase FL | 5.227053 | 0.010656 | not DE   | not DE  |
| EVM0007672 | LG12 | glycerol-3-phosphate dehydro | not DE   | not DE   | not DE   | not DE  |
| EVM0007729 | LG12 | heat shock protein 83-like   | -4.98251 | 5.25E-11 | -3.10078 | #####   |
| EVM0008953 | LG12 | heavy metal-associated isopr | not DE   | not DE   | not DE   | not DE  |
| EVM0018746 | LG12 | homeobox-leucine zipper prot | not DE   | not DE   | not DE   | not DE  |
| EVM0000853 | LG12 | homeobox-leucine zipper prot | not DE   | not DE   | not DE   | not DE  |
| EVM0012159 | LG12 | inactive rhomboid protein 1- | not DE   | not DE   | not DE   | not DE  |
| EVM0020539 | LG12 | inactive rhomboid protein 1- | 3.787387 | 0.008345 | 4.023107 | 0.00235 |
| EVM0021922 | LG12 | isocitrate dehydrogenase     | not DE   | not DE   | not DE   | not DE  |
| EVM0007187 | LG12 | kinesin-4-like               | not DE   | not DE   | not DE   | not DE  |
| EVM0024066 | LG12 | kinesin-like protein KIF22-A | not DE   | not DE   | 2.451298 | 0.00373 |
| EVM0012495 | LG12 | leucine-rich repeat receptor | not DE   | not DE   | not DE   | not DE  |
| EVM0007653 | LG12 | lipid phosphate phosphatase  | not DE   | not DE   | not DE   | not DE  |
| EVM0006334 | LG12 | lish domain and HEAT repeat- | not DE   | not DE   | not DE   | not DE  |
| EVM0023117 | LG12 | low-temperature-induced 65 k | 3.914137 | 0.00012  | not DE   | not DE  |
| EVM0019393 | LG12 | luc7-like protein 3          | not DE   | not DE   | not DE   | not DE  |
| EVM0020917 | LG12 | magnesium-chelatase subunit  | not DE   | not DE   | not DE   | not DE  |
| EVM0019749 | LG12 | mannose-6-phosphate isomeras | not DE   | not DE   | not DE   | not DE  |
| EVM0021062 | LG12 | methyltransferase-like prote | not DE   | not DE   | not DE   | not DE  |
| EVM0007584 | LG12 | microcephalin-like isoform X | not DE   | not DE   | not DE   | not DE  |
| EVM0000448 | LG12 | mitochondrial ribosome-assoc | not DE   | not DE   | not DE   | not DE  |
| EVM0022100 | LG12 | molybdenum cofactor sulfuras | 1.003201 | 0.025231 | not DE   | not DE  |
| EVM0005955 | LG12 | molybdenum cofactor sulfuras | not DE   | not DE   | 1.11191  | 0.0103  |
| EVM0009653 | LG12 | monocopper oxidase-like prot | not DE   | not DE   | not DE   | not DE  |
| EVM0001086 | LG12 | myb family transcription fac | -1.25878 | 0.000423 | not DE   | not DE  |
| EVM0006037 | LG12 | nephrocystin-3-like          | not DE   | not DE   | not DE   | not DE  |
| EVM0004227 | LG12 | nitric oxide-associated prot | not DE   | not DE   | not DE   | not DE  |
| EVM0004887 | LG12 | nitric oxide-associated prot | not DE   | not DE   | not DE   | not DE  |
| EVM0019331 | LG12 | non-functional NADPH-depende | not DE   | not DE   | not DE   | not DE  |
| EVM0005110 | LG12 | nuclear transcription factor | not DE   | not DE   | not DE   | not DE  |

|            |      |                                      |          |          |        |        |
|------------|------|--------------------------------------|----------|----------|--------|--------|
| EVM0013147 | LG12 | nucleolar protein 10-like            | not DE   | not DE   | not DE | not DE |
| EVM0016329 | LG12 | nudix hydrolase 16, mitochond        | not DE   | not DE   | not DE | not DE |
| EVM0012214 | LG12 | oleosin 1-like                       | not DE   | not DE   | not DE | not DE |
| EVM0016283 | LG12 | pentatricopeptide repeat-con         | not DE   | not DE   | not DE | not DE |
| EVM0020559 | LG12 | pentatricopeptide repeat-con         | not DE   | not DE   | not DE | not DE |
| EVM0017043 | LG12 | pentatricopeptide repeat-con         | 2.419752 | 0.000615 | not DE | not DE |
| EVM0007164 | LG12 | pentatricopeptide repeat-con         | not DE   | not DE   | not DE | not DE |
| EVM0014873 | LG12 | pentatricopeptide repeat-con         | not DE   | not DE   | not DE | not DE |
| EVM0022377 | LG12 | pentatricopeptide repeat-con         | not DE   | not DE   | not DE | not DE |
| EVM0012241 | LG12 | pentatricopeptide repeat-con         | not DE   | not DE   | not DE | not DE |
| EVM0016048 | LG12 | pentatricopeptide repeat-con         | not DE   | not DE   | not DE | not DE |
| EVM0003614 | LG12 | peroxidase 66-like                   | not DE   | not DE   | not DE | not DE |
| EVM0015382 | LG12 | peroxidase 66-like                   | not DE   | not DE   | not DE | not DE |
| EVM0004516 | LG12 | peroxisomal membrane protein         | not DE   | not DE   | not DE | not DE |
| EVM0015979 | LG12 | phosphate transporter PHO1 h         | not DE   | not DE   | not DE | not DE |
| EVM0023820 | LG12 | phosphatidylinositol N-acety         | not DE   | not DE   | not DE | not DE |
| EVM0023815 | LG12 | phosphoglucosyltransferase, chloropl | not DE   | not DE   | not DE | not DE |
| EVM0022258 | LG12 | plastidic glucose transporter        | not DE   | not DE   | not DE | not DE |
| EVM0016491 | LG12 | polygalacturonase-like               | not DE   | not DE   | not DE | not DE |
| EVM0020273 | LG12 | polyglutamine-binding protein        | not DE   | not DE   | not DE | not DE |
| EVM0021109 | LG12 | polypyrimidine tract-binding         | not DE   | not DE   | not DE | not DE |
| EVM0003678 | LG12 | probable E3 ubiquitin-protein        | not DE   | not DE   | not DE | not DE |
| EVM0011497 | LG12 | probable LRR receptor-like s         | not DE   | not DE   | not DE | not DE |
| EVM0014539 | LG12 | probable LRR receptor-like s         | not DE   | not DE   | not DE | not DE |
| EVM0021916 | LG12 | probable RNA helicase SDE3           | not DE   | not DE   | not DE | not DE |
| EVM0007330 | LG12 | probable U3 small nucleolar          | not DE   | not DE   | not DE | not DE |
| EVM0016319 | LG12 | probable UMP-CMP kinase 2            | not DE   | not DE   | not DE | not DE |
| EVM0022675 | LG12 | probable aquaporin NIP-type          | not DE   | not DE   | not DE | not DE |
| EVM0001951 | LG12 | probable fructokinase-4              | not DE   | not DE   | not DE | not DE |
| EVM0013986 | LG12 | probable galactinol--sucrose         | 2.444026 | 0.00325  | not DE | not DE |
| EVM0010485 | LG12 | probable membrane-associated         | not DE   | not DE   | not DE | not DE |
| EVM0004615 | LG12 | probable methyltransferase P         | not DE   | not DE   | not DE | not DE |
| EVM0001259 | LG12 | probable pectinesterase/pect         | not DE   | not DE   | not DE | not DE |
| EVM0008900 | LG12 | probable peptide/nitrate tra         | not DE   | not DE   | not DE | not DE |
| EVM0019419 | LG12 | probable protein S-acyltrans         | not DE   | not DE   | not DE | not DE |
| EVM0017529 | LG12 | probable protein S-acyltrans         | not DE   | not DE   | not DE | not DE |
| EVM0018267 | LG12 | probable quinone oxidoreduct         | not DE   | not DE   | not DE | not DE |
| EVM0020487 | LG12 | probable quinone oxidoreduct         | not DE   | not DE   | not DE | not DE |
| EVM0011254 | LG12 | probable rRNA-processing pro         | not DE   | not DE   | not DE | not DE |
| EVM0007122 | LG12 | probable receptor-like prote         | not DE   | not DE   | not DE | not DE |
| EVM0020777 | LG12 | probable receptor-like prote         | not DE   | not DE   | not DE | not DE |
| EVM0020036 | LG12 | probable serine/threonine-pr         | not DE   | not DE   | not DE | not DE |
| EVM0014292 | LG12 | probable serine/threonine-pr         | not DE   | not DE   | not DE | not DE |
| EVM0017998 | LG12 | probable sugar phosphate/pho         | -1.54218 | 0.046327 | not DE | not DE |
| EVM0005519 | LG12 | probable trehalose-phosphate         | not DE   | not DE   | not DE | not DE |
| EVM0024495 | LG12 | probably inactive leucine-ri         | not DE   | not DE   | not DE | not DE |
| EVM0010165 | LG12 | proline-rich protein 2-like          | not DE   | not DE   | not DE | not DE |
| EVM0010112 | LG12 | proline-rich receptor-like p         | not DE   | not DE   | not DE | not DE |
| EVM0000567 | LG12 | proteasome subunit alpha typ         | not DE   | not DE   | not DE | not DE |
| EVM0022961 | LG12 | protein DJ-1 homolog D               | not DE   | not DE   | not DE | not DE |
| EVM0005480 | LG12 | protein EARLY RESPONSIVE TO          | not DE   | not DE   | not DE | not DE |
| EVM0023595 | LG12 | protein EARLY RESPONSIVE TO          | 1.636275 | 0.029122 | not DE | not DE |
| EVM0005160 | LG12 | protein FEZ-like                     | not DE   | not DE   | not DE | not DE |
| EVM0023194 | LG12 | protein FEZ-like                     | not DE   | not DE   | not DE | not DE |

|            |      |                               |          |          |          |         |
|------------|------|-------------------------------|----------|----------|----------|---------|
| EVM0007512 | LG12 | protein GAST1-like            | not DE   | not DE   | not DE   | not DE  |
| EVM0014993 | LG12 | protein GAST1-like            | not DE   | not DE   | not DE   | not DE  |
| EVM0014730 | LG12 | protein LST8 homolog isoform  | not DE   | not DE   | not DE   | not DE  |
| EVM0014418 | LG12 | protein PLASTID MOVEMENT IMP  | not DE   | not DE   | not DE   | not DE  |
| EVM0006894 | LG12 | protein RFT1 homolog          | not DE   | not DE   | not DE   | not DE  |
| EVM0020682 | LG12 | protein SEC13 homolog         | not DE   | not DE   | not DE   | not DE  |
| EVM0017619 | LG12 | protein TPX2-like             | not DE   | not DE   | not DE   | not DE  |
| EVM0023175 | LG12 | protein TPX2-like isoform X1  | not DE   | not DE   | not DE   | not DE  |
| EVM0008984 | LG12 | protein TRANSPARENT TESTA 12  | not DE   | not DE   | not DE   | not DE  |
| EVM0009596 | LG12 | protein notum homolog isoform | not DE   | not DE   | not DE   | not DE  |
| EVM0009341 | LG12 | protein strawberry notch-like | not DE   | not DE   | not DE   | not DE  |
| EVM0023637 | LG12 | protein sym-1                 | not DE   | not DE   | not DE   | not DE  |
| EVM0002303 | LG12 | psbP domain-containing prote  | not DE   | not DE   | not DE   | not DE  |
| EVM0005089 | LG12 | putative 4-hydroxy-tetrahydr  | not DE   | not DE   | not DE   | not DE  |
| EVM0023803 | LG12 | putative Peroxidase 48-like   | not DE   | not DE   | not DE   | not DE  |
| EVM0003424 | LG12 | putative disease resistance   | not DE   | not DE   | not DE   | not DE  |
| EVM0023699 | LG12 | putative disease resistance   | not DE   | not DE   | not DE   | not DE  |
| EVM0023723 | LG12 | putative lipase ROG1-like     | not DE   | not DE   | not DE   | not DE  |
| EVM0011890 | LG12 | putative pentatricopeptide r  | 1.466205 | 0.037059 | not DE   | not DE  |
| EVM0000925 | LG12 | putative pentatricopeptide r  | not DE   | not DE   | not DE   | not DE  |
| EVM0006789 | LG12 | putative pentatricopeptide r  | 2.089385 | 0.005056 | not DE   | not DE  |
| EVM0017510 | LG12 | putative pentatricopeptide r  | not DE   | not DE   | not DE   | not DE  |
| EVM0010161 | LG12 | putative transporter arsB-li  | 1.152616 | 0.044828 | not DE   | not DE  |
| EVM0021418 | LG12 | putative transporter arsB-li  | not DE   | not DE   | not DE   | not DE  |
| EVM0002398 | LG12 | putative two-component respo  | not DE   | not DE   | not DE   | not DE  |
| EVM0006588 | LG12 | putative two-component respo  | not DE   | not DE   | not DE   | not DE  |
| EVM0014138 | LG12 | putative uncharacterized pro  | not DE   | not DE   | not DE   | not DE  |
| EVM0015313 | LG12 | putative uncharacterized pro  | not DE   | not DE   | not DE   | not DE  |
| EVM0011176 | LG12 | pyrroline-5-carboxylate redu  | not DE   | not DE   | not DE   | not DE  |
| EVM0014885 | LG12 | rab proteins geranylgeranyl   | not DE   | not DE   | not DE   | not DE  |
| EVM0018869 | LG12 | rab proteins geranylgeranyl   | not DE   | not DE   | not DE   | not DE  |
| EVM0019344 | LG12 | ras-related protein RABD2a-l  | not DE   | not DE   | not DE   | not DE  |
| EVM0012979 | LG12 | ribulose biphosphate carbox   | -2.17195 | 0.002022 | not DE   | not DE  |
| EVM0015427 | LG12 | serine carboxypeptidase-like  | not DE   | not DE   | not DE   | not DE  |
| EVM0007219 | LG12 | serine/threonine-protein kin  | not DE   | not DE   | not DE   | not DE  |
| EVM0002122 | LG12 | serine/threonine-protein kin  | not DE   | not DE   | not DE   | not DE  |
| EVM0003173 | LG12 | short-chain dehydrogenase TI  | not DE   | not DE   | not DE   | not DE  |
| EVM0013574 | LG12 | short-chain dehydrogenase TI  | not DE   | not DE   | not DE   | not DE  |
| EVM0017948 | LG12 | short-chain dehydrogenase TI  | not DE   | not DE   | not DE   | not DE  |
| EVM0017939 | LG12 | short-chain dehydrogenase TI  | not DE   | not DE   | not DE   | not DE  |
| EVM0019185 | LG12 | short-chain dehydrogenase TI  | not DE   | not DE   | not DE   | not DE  |
| EVM0013128 | LG12 | sigma factor binding protein  | not DE   | not DE   | 2.278929 | #####   |
| EVM0006936 | LG12 | sorbitol dehydrogenase        | not DE   | not DE   | not DE   | not DE  |
| EVM0013607 | LG12 | spermine synthase-like isof   | not DE   | not DE   | not DE   | not DE  |
| EVM0016988 | LG12 | stellacyanin-like             | not DE   | not DE   | not DE   | not DE  |
| EVM0018670 | LG12 | stress response protein NST1  | not DE   | not DE   | not DE   | not DE  |
| EVM0013542 | LG12 | strictosidine synthase 1-lik  | not DE   | not DE   | not DE   | not DE  |
| EVM0012053 | LG12 | structural maintenance of ch  | not DE   | not DE   | not DE   | not DE  |
| EVM0012564 | LG12 | structural maintenance of ch  | not DE   | not DE   | not DE   | not DE  |
| EVM0008512 | LG12 | structural maintenance of ch  | not DE   | not DE   | not DE   | not DE  |
| EVM0023040 | LG12 | sucrose synthase 6-like       | not DE   | not DE   | not DE   | not DE  |
| EVM0005468 | LG12 | traB domain-containing prote  | not DE   | not DE   | not DE   | not DE  |
| EVM0018179 | LG12 | transcription elongation fac  | not DE   | not DE   | not DE   | not DE  |
| EVM0000256 | LG12 | transcription factor BEE 3-l  | not DE   | not DE   | 1.662579 | 0.02146 |

|            |      |                                       |           |          |          |         |
|------------|------|---------------------------------------|-----------|----------|----------|---------|
| EVM0016029 | LG12 | transcription factor JUNGBR1          | not DE    | not DE   | not DE   | not DE  |
| EVM0018775 | LG12 | transcription factor ORG2             | not DE    | not DE   | not DE   | not DE  |
| EVM0024174 | LG12 | transcription factor bHLH106          | not DE    | not DE   | not DE   | not DE  |
| EVM0010442 | LG12 | transcription factor bHLH126          | not DE    | not DE   | not DE   | not DE  |
| EVM0020293 | LG12 | transcription factor bHLH130          | not DE    | not DE   | not DE   | not DE  |
| EVM0013296 | LG12 | transcriptional corepressor           | not DE    | not DE   | not DE   | not DE  |
| EVM0023234 | LG12 | transketolase, chloroplastic          | not DE    | not DE   | not DE   | not DE  |
| EVM0011416 | LG12 | trehalose-phosphate phosphatase       | not DE    | not DE   | not DE   | not DE  |
| EVM0013874 | LG12 | triacylglycerol lipase SDP1           | -1.489212 | 0.047423 | not DE   | not DE  |
| EVM0023601 | LG12 | tripeptidyl-peptidase 2-like          | not DE    | not DE   | -1.00998 | 0.00311 |
| EVM0001218 | LG12 | troponin T, cardiac muscle-like       | not DE    | not DE   | not DE   | not DE  |
| EVM0006990 | LG12 | ubiquitin carboxyl-terminal hydrolase | not DE    | not DE   | not DE   | not DE  |
| EVM0023182 | LG12 | ubiquitin-NEDD8-like protein          | not DE    | not DE   | not DE   | not DE  |
| EVM0023287 | LG12 | uncharacterized protein At3g53210     | not DE    | not DE   | -1.37889 | #####   |
| EVM0020859 | LG12 | uncharacterized protein CIA6          | not DE    | not DE   | not DE   | not DE  |
| EVM0023068 | LG12 | uncharacterized protein CIA6          | not DE    | not DE   | not DE   | not DE  |
| EVM0017289 | LG12 | uncharacterized protein LOC101928251  | not DE    | not DE   | not DE   | not DE  |
| EVM0000069 | LG12 | uncharacterized protein LOC101928251  | not DE    | not DE   | not DE   | not DE  |
| EVM0002174 | LG12 | uncharacterized protein LOC101928251  | not DE    | not DE   | not DE   | not DE  |
| EVM0023271 | LG12 | uncharacterized protein LOC101928251  | not DE    | not DE   | not DE   | not DE  |
| EVM0020676 | LG12 | uncharacterized protein LOC101928251  | not DE    | not DE   | not DE   | not DE  |
| EVM0021262 | LG12 | uncharacterized protein LOC101928251  | not DE    | not DE   | not DE   | not DE  |
| EVM0022070 | LG12 | uncharacterized protein LOC101928251  | -1.85256  | 2.40E-05 | not DE   | not DE  |
| EVM0014583 | LG12 | uncharacterized protein LOC101928251  | not DE    | not DE   | not DE   | not DE  |
| EVM0014875 | LG12 | uncharacterized protein LOC101928251  | not DE    | not DE   | not DE   | not DE  |
| EVM0022625 | LG12 | uncharacterized protein LOC101928251  | not DE    | not DE   | not DE   | not DE  |
| EVM0004873 | LG12 | uncharacterized protein LOC101928251  | not DE    | not DE   | not DE   | not DE  |
| EVM0013027 | LG12 | uncharacterized protein LOC101928251  | not DE    | not DE   | not DE   | not DE  |
| EVM0019309 | LG12 | uncharacterized protein LOC101928251  | not DE    | not DE   | not DE   | not DE  |
| EVM0010983 | LG12 | uncharacterized protein LOC101928251  | not DE    | not DE   | not DE   | not DE  |
| EVM0000263 | LG12 | uncharacterized protein LOC101928251  | not DE    | not DE   | 1.623912 | 0.01373 |
| EVM0013171 | LG12 | uncharacterized protein LOC101928251  | not DE    | not DE   | not DE   | not DE  |
| EVM0008293 | LG12 | uncharacterized protein LOC101928251  | not DE    | not DE   | not DE   | not DE  |
| EVM0000389 | LG12 | uncharacterized protein LOC101928251  | 2.51363   | 0.000239 | not DE   | not DE  |
| EVM0001912 | LG12 | uncharacterized protein LOC101928251  | not DE    | not DE   | not DE   | not DE  |
| EVM0007760 | LG12 | uncharacterized protein LOC101928251  | not DE    | not DE   | not DE   | not DE  |
| EVM0022593 | LG12 | uncharacterized protein LOC101928251  | not DE    | not DE   | not DE   | not DE  |
| EVM0000007 | LG12 | uncharacterized protein LOC101928251  | not DE    | not DE   | not DE   | not DE  |
| EVM0002737 | LG12 | uncharacterized protein LOC101928251  | not DE    | not DE   | not DE   | not DE  |
| EVM0009297 | LG12 | uncharacterized protein LOC101928251  | not DE    | not DE   | not DE   | not DE  |
| EVM0021268 | LG12 | uncharacterized protein LOC101928251  | not DE    | not DE   | not DE   | not DE  |
| EVM0001112 | LG12 | uncharacterized protein LOC101928251  | not DE    | not DE   | not DE   | not DE  |
| EVM0020381 | LG12 | uncharacterized protein LOC101928251  | not DE    | not DE   | not DE   | not DE  |
| EVM0000880 | LG12 | uncharacterized protein LOC101928251  | not DE    | not DE   | not DE   | not DE  |
| EVM0017403 | LG12 | uncharacterized protein LOC101928251  | not DE    | not DE   | not DE   | not DE  |
| EVM0017454 | LG12 | uncharacterized protein LOC101928251  | not DE    | not DE   | not DE   | not DE  |
| EVM0023022 | LG12 | uncharacterized protein LOC101928251  | not DE    | not DE   | not DE   | not DE  |
| EVM0019406 | LG12 | uncharacterized protein LOC101928251  | not DE    | not DE   | not DE   | not DE  |
| EVM0014813 | LG12 | uncharacterized protein LOC101928251  | not DE    | not DE   | not DE   | not DE  |
| EVM0008337 | LG12 | uncharacterized protein LOC101928251  | not DE    | not DE   | not DE   | not DE  |
| EVM0013681 | LG12 | uncharacterized protein LOC101928251  | not DE    | not DE   | not DE   | not DE  |
| EVM0002508 | LG12 | uncharacterized protein LOC101928251  | not DE    | not DE   | not DE   | not DE  |
| EVM0007537 | LG12 | uncharacterized protein LOC101928251  | not DE    | not DE   | not DE   | not DE  |
| EVM0024065 | LG12 | uncharacterized protein LOC101928251  | not DE    | not DE   | not DE   | not DE  |



|            |      |                               |      |          |          |          |         |
|------------|------|-------------------------------|------|----------|----------|----------|---------|
| EVM0021470 | LG12 | uncharacterized protein       | LOC1 | not DE   | not DE   | not DE   | not DE  |
| EVM0022289 | LG12 | uncharacterized protein       | LOC1 | not DE   | not DE   | not DE   | not DE  |
| EVM0005094 | LG12 | uncharacterized protein       | LOC1 | not DE   | not DE   | not DE   | not DE  |
| EVM0008692 | LG12 | uncharacterized protein       | LOC1 | not DE   | not DE   | not DE   | not DE  |
| EVM0002616 | LG12 | uncharacterized protein       | LOC1 | not DE   | not DE   | not DE   | not DE  |
| EVM0002277 | LG12 | uncharacterized protein       | LOC1 | not DE   | not DE   | not DE   | not DE  |
| EVM0016612 | LG12 | uncharacterized protein       | LOC1 | not DE   | not DE   | not DE   | not DE  |
| EVM0005639 | LG12 | uncharacterized protein       | LOC1 | not DE   | not DE   | not DE   | not DE  |
| EVM0021517 | LG12 | uncharacterized protein       | LOC1 | not DE   | not DE   | not DE   | not DE  |
| EVM0017127 | LG12 | uncharacterized protein       | LOC1 | not DE   | not DE   | not DE   | not DE  |
| EVM0001289 | LG12 | uncharacterized protein       | LOC1 | not DE   | not DE   | not DE   | not DE  |
| EVM0024466 | LG12 | uncharacterized protein       | LOC1 | not DE   | not DE   | not DE   | not DE  |
| EVM0015810 | LG12 | uncharacterized protein       | LOC1 | not DE   | not DE   | not DE   | not DE  |
| EVM0011229 | LG12 | uncharacterized protein       | LOC1 | not DE   | not DE   | not DE   | not DE  |
| EVM0020021 | LG12 | uncharacterized protein       | LOC1 | not DE   | not DE   | not DE   | not DE  |
| EVM0010193 | LG12 | uncharacterized protein       | LOC1 | not DE   | not DE   | not DE   | not DE  |
| EVM0023460 | LG12 | uncharacterized protein       | LOC1 | not DE   | not DE   | not DE   | not DE  |
| EVM0018247 | LG12 | uncharacterized protein       | LOC1 | not DE   | not DE   | not DE   | not DE  |
| EVM0007422 | LG12 | uncharacterized protein       | LOC1 | not DE   | not DE   | not DE   | not DE  |
| EVM0022386 | LG12 | uncharacterized protein       | LOC1 | not DE   | not DE   | not DE   | not DE  |
| EVM0007353 | LG12 | uncharacterized protein       | LOC1 | not DE   | not DE   | not DE   | not DE  |
| EVM0013957 | LG12 | uncharacterized protein       | LOC1 | not DE   | not DE   | not DE   | not DE  |
| EVM0016219 | LG12 | uncharacterized protein       | LOC1 | not DE   | not DE   | not DE   | not DE  |
| EVM0011022 | LG12 | uncharacterized protein       | LOC1 | not DE   | not DE   | not DE   | not DE  |
| EVM0015107 | LG12 | uncharacterized protein       | LOC1 | not DE   | not DE   | not DE   | not DE  |
| EVM0018596 | LG12 | uncharacterized protein       | LOC1 | not DE   | not DE   | not DE   | not DE  |
| EVM0017696 | LG12 | uncharacterized protein       | LOC1 | not DE   | not DE   | not DE   | not DE  |
| EVM0002492 | LG12 | uncharacterized protein       | LOC1 | not DE   | not DE   | not DE   | not DE  |
| EVM0002245 | LG12 | uncharacterized protein       | LOC1 | not DE   | not DE   | not DE   | not DE  |
| EVM0003280 | LG12 | uncharacterized protein       | LOC1 | not DE   | not DE   | not DE   | not DE  |
| EVM0002067 | LG12 | uncharacterized protein       | LOC1 | not DE   | not DE   | 1.262612 | #####   |
| EVM0012181 | LG12 | uncharacterized protein       | LOC1 | not DE   | not DE   | not DE   | not DE  |
| EVM0004543 | LG12 | uncharacterized protein       | LOC1 | not DE   | not DE   | not DE   | not DE  |
| EVM0021006 | LG12 | uncharacterized protein       | LOC1 | not DE   | not DE   | not DE   | not DE  |
| EVM0002632 | LG12 | uncharacterized protein       | LOC1 | not DE   | not DE   | not DE   | not DE  |
| EVM0006019 | LG12 | uncharacterized protein       | LOC1 | not DE   | not DE   | not DE   | not DE  |
| EVM0019585 | LG12 | uncharacterized protein       | LOC1 | not DE   | not DE   | not DE   | not DE  |
| EVM0014420 | LG12 | uncharacterized protein       | LOC1 | not DE   | not DE   | not DE   | not DE  |
| EVM0000848 | LG12 | uncharacterized protein       | LOC1 | not DE   | not DE   | not DE   | not DE  |
| EVM0017697 | LG12 | uncharacterized protein       | LOC1 | not DE   | not DE   | not DE   | not DE  |
| EVM0017972 | LG12 | uncharacterized protein       | LOC1 | not DE   | not DE   | not DE   | not DE  |
| EVM0002905 | LG12 | uncharacterized protein       | LOC1 | not DE   | not DE   | not DE   | not DE  |
| EVM0022703 | LG12 | uncharacterized protein       | LOC1 | not DE   | not DE   | not DE   | not DE  |
| EVM0000696 | LG12 | uncharacterized protein       | LOC1 | not DE   | not DE   | not DE   | not DE  |
| EVM0013668 | LG12 | uncharacterized protein       | LOC1 | not DE   | not DE   | 1.127538 | 0.00011 |
| EVM0004658 | LG12 | uncharacterized protein       | LOC1 | not DE   | not DE   | not DE   | not DE  |
| EVM0006100 | LG12 | uncharacterized protein       | LOC1 | -1.45661 | 0.026721 | not DE   | not DE  |
| EVM0007587 | LG12 | uncharacterized protein       | LOC1 | not DE   | not DE   | not DE   | not DE  |
| EVM0019116 | LG12 | uncharacterized protein       | LOC1 | not DE   | not DE   | not DE   | not DE  |
| EVM0023014 | LG12 | uncharacterized protein       | MTH_ | not DE   | not DE   | not DE   | not DE  |
| EVM0023183 | LG12 | uncharacterized protein       | PAM6 | not DE   | not DE   | not DE   | not DE  |
| EVM0021913 | LG12 | uncharacterized protein       | ycf2 | not DE   | not DE   | not DE   | not DE  |
| EVM0007485 | LG12 | vacuolar amino acid transport |      | not DE   | not DE   | not DE   | not DE  |
| EVM0014597 | LG12 | vestitone reductase-like      |      | not DE   | not DE   | not DE   | not DE  |

|            |      |                                                     |          |          |          |         |
|------------|------|-----------------------------------------------------|----------|----------|----------|---------|
| EVM0000060 | LG12 | zeatin O-glucosyltransferase                        | not DE   | not DE   | not DE   | not DE  |
| EVM0000021 | LG12 | zinc finger A20 and AN1 domain                      | not DE   | not DE   | not DE   | not DE  |
| EVM0017863 | LG12 | zinc finger AN1 and C2H2 domain                     | not DE   | not DE   | not DE   | not DE  |
| EVM0017907 | LG12 | zinc finger CCCH domain-containing                  | not DE   | not DE   | not DE   | not DE  |
| EVM0000370 | LG12 | zinc finger CCCH domain-containing                  | not DE   | not DE   | not DE   | not DE  |
| EVM0006807 | LG12 | zinc finger protein 4-like                          | not DE   | not DE   | not DE   | not DE  |
| EVM0016749 | LG12 | zinc finger protein WIP2                            | not DE   | not DE   | not DE   | not DE  |
| EVM0015556 | LG12 | 1-amino-cyclopropane-1-carboxylate                  | not DE   | not DE   | not DE   | not DE  |
| EVM0023359 | LG12 | 2-hydroxyacyl-CoA lyase                             | 1.948297 | 0.019533 | not DE   | not DE  |
| EVM0003764 | LG12 | 23.6 kDa heat shock, mitochondrial                  | -5.84336 | 1.78E-09 | -3.36966 | #####   |
| EVM0006660 | LG12 | 3'-N-debenzoyl-2'-deoxyadenosine                    | not DE   | not DE   | not DE   | not DE  |
| EVM0015690 | LG12 | 30S ribosomal protein S11 (chloroplast)             | -2.01015 | 0.000242 | not DE   | not DE  |
| EVM0001681 | LG12 | 30S ribosomal protein S14 (chloroplast)             | -1.60285 | 0.005054 | not DE   | not DE  |
| EVM0016151 | LG12 | 30S ribosomal protein S4 (chloroplast)              | -1.88459 | 0.025817 | not DE   | not DE  |
| EVM0006554 | LG12 | 40S ribosomal S10-3-like protein                    | not DE   | not DE   | not DE   | not DE  |
| EVM0010541 | LG12 | 5'-AMP-activated protein kinase                     | not DE   | not DE   | not DE   | not DE  |
| EVM0015252 | LG12 | 50S ribosomal L15                                   | not DE   | not DE   | not DE   | not DE  |
| EVM0005940 | LG12 | 60S ribosomal protein L15                           | not DE   | not DE   | not DE   | not DE  |
| EVM0013958 | LG12 | 60S ribosomal protein L15                           | not DE   | not DE   | not DE   | not DE  |
| EVM0017374 | LG12 | 60S ribosomal protein L15                           | not DE   | not DE   | not DE   | not DE  |
| EVM0009707 | LG12 | 60S ribosomal protein L36-2                         | not DE   | not DE   | not DE   | not DE  |
| EVM0000569 | LG12 | ADP-ribosylation factor, putative                   | not DE   | not DE   | not DE   | not DE  |
| EVM0023212 | LG12 | AGC kinase 1.5                                      | not DE   | not DE   | not DE   | not DE  |
| EVM0017408 | LG12 | AMP-dependent synthetase and lyase                  | not DE   | not DE   | not DE   | not DE  |
| EVM0001843 | LG12 | AP2/ERF domain-containing transcription factor      | not DE   | not DE   | not DE   | not DE  |
| EVM0006642 | LG12 | AP2/ERF domain-containing transcription factor      | not DE   | not DE   | not DE   | not DE  |
| EVM0021761 | LG12 | ARABIDILLO-1 isoform 1                              | not DE   | not DE   | not DE   | not DE  |
| EVM0018767 | LG12 | ARM repeat superfamily protein                      | not DE   | not DE   | not DE   | not DE  |
| EVM0001090 | LG12 | ATP-dependent Clp protease ATP-binding subunit ClpX | not DE   | not DE   | not DE   | not DE  |
| EVM0012841 | LG12 | Alpha/beta-Hydrolases superfamily class A member    | not DE   | not DE   | not DE   | not DE  |
| EVM0021912 | LG12 | Annexin 1                                           | not DE   | not DE   | 1.505327 | 0.03112 |
| EVM0009386 | LG12 | Autophagy-related protein 3                         | not DE   | not DE   | 2.022783 | #####   |
| EVM0008783 | LG12 | Auxin efflux carrier family protein                 | not DE   | not DE   | not DE   | not DE  |
| EVM0005801 | LG12 | BCL-2-associated athanogene 7                       | not DE   | not DE   | not DE   | not DE  |
| EVM0004174 | LG12 | CRT/DRE-binding factor                              | 5.027091 | 0.000793 | not DE   | not DE  |
| EVM0024297 | LG12 | Caspase, putative                                   | not DE   | not DE   | not DE   | not DE  |
| EVM0018487 | LG12 | Cleavage/polyadenylation specificity factor         | not DE   | not DE   | not DE   | not DE  |
| EVM0023383 | LG12 | Cytochrome P450 704C1                               | not DE   | not DE   | not DE   | not DE  |
| EVM0007609 | LG12 | Cytochrome P450 monooxygenase                       | not DE   | not DE   | -2.26989 | 0.00037 |
| EVM0018503 | LG12 | Cytochrome P450, family 706, subfamily 1            | not DE   | not DE   | not DE   | not DE  |
| EVM0006379 | LG12 | Cytochrome P450, putative                           | not DE   | not DE   | not DE   | not DE  |
| EVM0010333 | LG12 | Cytochrome P450, putative                           | -2.9068  | 0.01489  | not DE   | not DE  |
| EVM0022255 | LG12 | Cytochrome P450, putative                           | not DE   | not DE   | not DE   | not DE  |
| EVM0011871 | LG12 | DCN1-like protein 2                                 | not DE   | not DE   | not DE   | not DE  |
| EVM0003841 | LG12 | DNA-directed RNA polymerase I                       | -2.25289 | 3.24E-19 | -1.63922 | #####   |
| EVM0019546 | LG12 | Dicarboxylate diiron protein                        | -2.12241 | 0.003767 | not DE   | not DE  |
| EVM0007743 | LG12 | Double Clp-N motif protein                          | not DE   | not DE   | not DE   | not DE  |
| EVM0023345 | LG12 | Ethylene response factor 2                          | not DE   | not DE   | not DE   | not DE  |
| EVM0002813 | LG12 | Ethylene-responsive transcription factor            | not DE   | not DE   | not DE   | not DE  |
| EVM0022197 | LG12 | F-box protein                                       | not DE   | not DE   | not DE   | not DE  |
| EVM0005070 | LG12 | F1504.13                                            | not DE   | not DE   | not DE   | not DE  |
| EVM0015367 | LG12 | F1504.13                                            | not DE   | not DE   | not DE   | not DE  |
| EVM0001715 | LG12 | Glutamate decarboxylase                             | not DE   | not DE   | not DE   | not DE  |
| EVM0022239 | LG12 | Glutathione-regulated potassium channel             | not DE   | not DE   | not DE   | not DE  |

|            |      |                                  |          |          |          |         |
|------------|------|----------------------------------|----------|----------|----------|---------|
| EVM0007349 | LG12 | Heat Stress Transcription Factor | not DE   | not DE   | not DE   | not DE  |
| EVM0014086 | LG12 | Heat shock transcription factor  | -2.0935  | 5.42E-05 | -1.40839 | #####   |
| EVM0017367 | LG12 | IQ-domain 24, putative           | not DE   | not DE   | not DE   | not DE  |
| EVM0007130 | LG12 | Insulinase (Peptidase family     | not DE   | not DE   | not DE   | not DE  |
| EVM0001992 | LG12 | Integrase-type DNA-binding su    | not DE   | not DE   | not DE   | not DE  |
| EVM0014310 | LG12 | Integrase-type DNA-binding su    | not DE   | not DE   | not DE   | not DE  |
| EVM0001246 | LG12 | Integrase-type DNA-binding su    | not DE   | not DE   | not DE   | not DE  |
| EVM0024025 | LG12 | KDEL motif-containing protein    | not DE   | not DE   | not DE   | not DE  |
| EVM0004791 | LG12 | Kinase superfamily protein is    | not DE   | not DE   | not DE   | not DE  |
| EVM0009758 | LG12 | LOB domain-containing protein    | not DE   | not DE   | not DE   | not DE  |
| EVM0019500 | LG12 | Leucine-rich repeat protein k    | not DE   | not DE   | not DE   | not DE  |
| EVM0021482 | LG12 | Leucine-rich repeat protein k    | not DE   | not DE   | not DE   | not DE  |
| EVM0016034 | LG12 | Leucine-rich repeat receptor-    | not DE   | not DE   | not DE   | not DE  |
| EVM0013278 | LG12 | Long-chain basel isoform 1       | not DE   | not DE   | not DE   | not DE  |
| EVM0005165 | LG12 | Major facilitator superfamily    | not DE   | not DE   | not DE   | not DE  |
| EVM0017789 | LG12 | Major facilitator superfamily    | not DE   | not DE   | not DE   | not DE  |
| EVM0015766 | LG12 | Membrane steroid-binding 2 -l    | not DE   | not DE   | not DE   | not DE  |
| EVM0020525 | LG12 | Microtubule-associated protein   | not DE   | not DE   | not DE   | not DE  |
| EVM0016152 | LG12 | Myb domain protein 6             | not DE   | not DE   | not DE   | not DE  |
| EVM0004297 | LG12 | Myb transcription factor         | not DE   | not DE   | not DE   | not DE  |
| EVM0010399 | LG12 | Myosin heavy chain-related is    | not DE   | not DE   | not DE   | not DE  |
| EVM0014185 | LG12 | Myosin heavy chain-related pr    | not DE   | not DE   | not DE   | not DE  |
| EVM0013765 | LG12 | NADH dehydrogenase, putative     | not DE   | not DE   | not DE   | not DE  |
| EVM0024532 | LG12 | NC domain-containing family p    | not DE   | not DE   | not DE   | not DE  |
| EVM0004359 | LG12 | Nuclear factor Y, putative is    | not DE   | not DE   | not DE   | not DE  |
| EVM0021286 | LG12 | Nuclear transcription factor     | not DE   | not DE   | not DE   | not DE  |
| EVM0011215 | LG12 | P-loop containing nucleoside     | not DE   | not DE   | 1.121873 | 0.00751 |
| EVM0004649 | LG12 | PAR1 protein                     | not DE   | not DE   | not DE   | not DE  |
| EVM0022533 | LG12 | PRP38 family protein isoform     | not DE   | not DE   | not DE   | not DE  |
| EVM0024644 | LG12 | Pentatricopeptide repeat supe    | not DE   | not DE   | not DE   | not DE  |
| EVM0013964 | LG12 | Pentatricopeptide repeat-cont    | not DE   | not DE   | not DE   | not DE  |
| EVM0014283 | LG12 | Phloem protein 2-A13             | 1.305683 | 0.020988 | not DE   | not DE  |
| EVM0017894 | LG12 | Phosphatase 2C family protein    | not DE   | not DE   | not DE   | not DE  |
| EVM0012686 | LG12 | Phosphatidyl inositol monopho    | not DE   | not DE   | not DE   | not DE  |
| EVM0003730 | LG12 | Phosphoribosyltransferase fam    | not DE   | not DE   | not DE   | not DE  |
| EVM0003211 | LG12 | Potassium transporter, putati    | 6.890178 | 0.000941 | not DE   | not DE  |
| EVM0008533 | LG12 | Prenyltransferase superfami      | not DE   | not DE   | not DE   | not DE  |
| EVM0009589 | LG12 | Prenyltransferase superfami      | not DE   | not DE   | not DE   | not DE  |
| EVM0020405 | LG12 | Putative phagocytic receptor     | not DE   | not DE   | not DE   | not DE  |
| EVM0003578 | LG12 | RING/FYVE/PHD zinc finger sup    | not DE   | not DE   | not DE   | not DE  |
| EVM0024347 | LG12 | RING/FYVE/PHD zinc finger sup    | not DE   | not DE   | not DE   | not DE  |
| EVM0017790 | LG12 | Regulatory NPR5 -like protein    | not DE   | not DE   | not DE   | not DE  |
| EVM0023586 | LG12 | Retrovirus-related Pol polypr    | not DE   | not DE   | not DE   | not DE  |
| EVM0014816 | LG12 | Rhd six-like 1, putative         | not DE   | not DE   | not DE   | not DE  |
| EVM0004504 | LG12 | Ribosomal protein S10p/S20e f    | not DE   | not DE   | not DE   | not DE  |
| EVM0016688 | LG12 | SEC14 cytosolic factor family    | not DE   | not DE   | not DE   | not DE  |
| EVM0007716 | LG12 | SKP1                             | not DE   | not DE   | not DE   | not DE  |
| EVM0014727 | LG12 | SOC1-like protein 2              | not DE   | not DE   | not DE   | not DE  |
| EVM0023949 | LG12 | SWITCH1, putative                | not DE   | not DE   | not DE   | not DE  |
| EVM0019509 | LG12 | Scarecrow-like protein 8, put    | not DE   | not DE   | not DE   | not DE  |
| EVM0010747 | LG12 | Serine/threonine protein kina    | not DE   | not DE   | not DE   | not DE  |
| EVM0009351 | LG12 | Short-chain dehydrogenase-red    | not DE   | not DE   | not DE   | not DE  |
| EVM0014184 | LG12 | Spindle assembly abnormal pro    | not DE   | not DE   | not DE   | not DE  |
| EVM0018701 | LG12 | T-complex protein 11-like pro    | not DE   | not DE   | not DE   | not DE  |

|            |      |                               |        |        |          |         |
|------------|------|-------------------------------|--------|--------|----------|---------|
| EVM0008200 | LG12 | TCP family transcription fact | not DE | not DE | not DE   | not DE  |
| EVM0014314 | LG12 | TCP family transcription fact | not DE | not DE | not DE   | not DE  |
| EVM0016867 | LG12 | TGACG motif-binding factor 6  | not DE | not DE | not DE   | not DE  |
| EVM0010025 | LG12 | THO complex subunit 4-like pr | not DE | not DE | not DE   | not DE  |
| EVM0022170 | LG12 | TPX2 family protein           | not DE | not DE | not DE   | not DE  |
| EVM0006333 | LG12 | Tetratricopeptide repeat-like | not DE | not DE | not DE   | not DE  |
| EVM0018734 | LG12 | Transmembrane isoform 1       | not DE | not DE | not DE   | not DE  |
| EVM0004592 | LG12 | Tripeptidyl-peptidase 2       | not DE | not DE | not DE   | not DE  |
| EVM0019114 | LG12 | Two-component response regula | not DE | not DE | not DE   | not DE  |
| EVM0003917 | LG12 | Type-a response regulator     | not DE | not DE | not DE   | not DE  |
| EVM0013709 | LG12 | UDP-glucosyltransferase, puta | not DE | not DE | not DE   | not DE  |
| EVM0001625 | LG12 | UDP-glycosyltransferase 87A1  | not DE | not DE | not DE   | not DE  |
| EVM0002878 | LG12 | Uncharacterized protein TCM_C | not DE | not DE | not DE   | not DE  |
| EVM0014601 | LG12 | Uncharacterized protein TCM_C | not DE | not DE | not DE   | not DE  |
| EVM0002996 | LG12 | Uncharacterized protein TCM_C | not DE | not DE | not DE   | not DE  |
| EVM0010534 | LG12 | Uncharacterized protein TCM_C | not DE | not DE | not DE   | not DE  |
| EVM0002895 | LG12 | Uncharacterized protein TCM_C | not DE | not DE | not DE   | not DE  |
| EVM0023582 | LG12 | Uncharacterized protein TCM_C | not DE | not DE | not DE   | not DE  |
| EVM0021701 | LG12 | Uncharacterized protein TCM_C | not DE | not DE | not DE   | not DE  |
| EVM0001763 | LG12 | Uncharacterized protein TCM_C | not DE | not DE | not DE   | not DE  |
| EVM0011262 | LG12 | Uncharacterized protein TCM_C | not DE | not DE | not DE   | not DE  |
| EVM0006874 | LG12 | Uncharacterized protein TCM_C | not DE | not DE | not DE   | not DE  |
| EVM0023036 | LG12 | Uncharacterized protein TCM_C | not DE | not DE | not DE   | not DE  |
| EVM0015478 | LG12 | Uncharacterized protein TCM_C | not DE | not DE | not DE   | not DE  |
| EVM0007169 | LG12 | Uncharacterized protein isofc | not DE | not DE | not DE   | not DE  |
| EVM0013503 | LG12 | Uncharacterized protein isofc | not DE | not DE | not DE   | not DE  |
| EVM0002298 | LG12 | Uncharacterized protein isofc | not DE | not DE | 1.148758 | 0.04232 |
| EVM0006293 | LG12 | WRKY DNA-binding protein 27,  | not DE | not DE | not DE   | not DE  |
| EVM0007056 | LG12 | WRKY transcription factor 53  | not DE | not DE | not DE   | not DE  |
| EVM0005012 | LG12 | XB3 in isoform 1              | not DE | not DE | not DE   | not DE  |
| EVM0008809 | LG12 | Xyloglucan galactosyltransfer | not DE | not DE | not DE   | not DE  |
| EVM0013680 | LG12 | Zinc finger C-x8-C-x5-C-x3-H  | not DE | not DE | not DE   | not DE  |
| EVM0018474 | LG12 | Zinc finger C-x8-C-x5-C-x3-H  | not DE | not DE | not DE   | not DE  |
| EVM0017791 | LG12 | Zinc finger protein 6, putati | not DE | not DE | not DE   | not DE  |
| EVM0004878 | LG12 | Zinc finger protein, putative | not DE | not DE | not DE   | not DE  |
| EVM0005893 | LG12 | Zinc finger protein, putative | not DE | not DE | not DE   | not DE  |
| EVM0022856 | LG12 | Zinc finger protein, putative | not DE | not DE | not DE   | not DE  |
| EVM0023768 | LG12 | Zinc finger protein, putative | not DE | not DE | not DE   | not DE  |
| EVM0014444 | LG12 | ankyrin repeat family protein | not DE | not DE | not DE   | not DE  |
| EVM0001010 | LG12 | ankyrin repeat-containing pro | not DE | not DE | not DE   | not DE  |
| EVM0017035 | LG12 | ankyrin repeat-containing pro | not DE | not DE | not DE   | not DE  |
| EVM0020921 | LG12 | ankyrin repeat-containing pro | not DE | not DE | not DE   | not DE  |
| EVM0022230 | LG12 | ankyrin repeat-containing pro | not DE | not DE | not DE   | not DE  |
| EVM0005453 | LG12 | aspartyl protease family prot | not DE | not DE | not DE   | not DE  |
| EVM0000674 | LG12 | beta-carotene hydroxylase     | not DE | not DE | not DE   | not DE  |
| EVM0021045 | LG12 | calcium-binding EF-hand prote | not DE | not DE | not DE   | not DE  |
| EVM0009280 | LG12 | calcium-dependent protein kin | not DE | not DE | not DE   | not DE  |
| EVM0007759 | LG12 | chloroplast cystathionine bet | not DE | not DE | not DE   | not DE  |
| EVM0003377 | LG12 | conserved hypothetical protei | not DE | not DE | not DE   | not DE  |
| EVM0005969 | LG12 | conserved hypothetical protei | not DE | not DE | not DE   | not DE  |
| EVM0006599 | LG12 | conserved hypothetical protei | not DE | not DE | not DE   | not DE  |
| EVM0006677 | LG12 | conserved hypothetical protei | not DE | not DE | not DE   | not DE  |
| EVM0016936 | LG12 | conserved hypothetical protei | not DE | not DE | not DE   | not DE  |
| EVM0017762 | LG12 | conserved hypothetical protei | not DE | not DE | not DE   | not DE  |

|            |      |                                          |          |          |          |         |
|------------|------|------------------------------------------|----------|----------|----------|---------|
| EVM0017856 | LG12 | conserved hypothetical protein           | not DE   | not DE   | not DE   | not DE  |
| EVM0023065 | LG12 | conserved hypothetical protein           | not DE   | not DE   | not DE   | not DE  |
| EVM0018507 | LG12 | crooked neck family protein              | not DE   | not DE   | not DE   | not DE  |
| EVM0024391 | LG12 | cytochrome p450 51 family protein        | not DE   | not DE   | not DE   | not DE  |
| EVM0006105 | LG12 | dehydroascorbate reductase, putative     | not DE   | not DE   | not DE   | not DE  |
| EVM0007684 | LG12 | disease resistance family protein        | not DE   | not DE   | not DE   | not DE  |
| EVM0012850 | LG12 | disease resistance family protein        | not DE   | not DE   | not DE   | not DE  |
| EVM0005025 | LG12 | embryo-abundant family protein           | not DE   | not DE   | not DE   | not DE  |
| EVM0014978 | LG12 | embryonic flower 2a                      | not DE   | not DE   | not DE   | not DE  |
| EVM0004233 | LG12 | endo-1,4-beta-glucanase, putative        | not DE   | not DE   | not DE   | not DE  |
| EVM0008210 | LG12 | ent-kaurene synthase                     | not DE   | not DE   | not DE   | not DE  |
| EVM0007472 | LG12 | fructokinase                             | not DE   | not DE   | not DE   | not DE  |
| EVM0018697 | LG12 | geranyl geranyl pyrophosphate synthase   | not DE   | not DE   | not DE   | not DE  |
| EVM0010981 | LG12 | gibberellin 20-oxidase, putative         | not DE   | not DE   | not DE   | not DE  |
| EVM0001159 | LG12 | glucanase                                | not DE   | not DE   | not DE   | not DE  |
| EVM0019168 | LG12 | glutamine synthetase                     | not DE   | not DE   | not DE   | not DE  |
| EVM0009491 | LG12 | glutathione S-transferase                | not DE   | not DE   | not DE   | not DE  |
| EVM0020586 | LG12 | glutathione S-transferase                | not DE   | not DE   | not DE   | not DE  |
| EVM0018961 | LG12 | glyceraldehyde 3-phosphate dehydrogenase | not DE   | not DE   | not DE   | not DE  |
| EVM0017527 | LG12 | glycine-rich family protein              | not DE   | not DE   | not DE   | not DE  |
| EVM0023130 | LG12 | heavy-metal-associated domain protein    | not DE   | not DE   | not DE   | not DE  |
| EVM0011582 | LG12 | hydroxyproline-rich glycoprotein         | not DE   | not DE   | not DE   | not DE  |
| EVM0011245 | LG12 | hypothetical protein                     | not DE   | not DE   | not DE   | not DE  |
| EVM0009754 | LG12 | hypothetical protein 2                   | not DE   | not DE   | not DE   | not DE  |
| EVM0004091 | LG12 | hypothetical protein AALP_AA8            | not DE   | not DE   | not DE   | not DE  |
| EVM0022035 | LG12 | hypothetical protein AMTR_s05            | not DE   | not DE   | not DE   | not DE  |
| EVM0018009 | LG12 | hypothetical protein CARUB_v1            | not DE   | not DE   | not DE   | not DE  |
| EVM0004779 | LG12 | hypothetical protein CICLE_v1            | not DE   | not DE   | not DE   | not DE  |
| EVM0007976 | LG12 | hypothetical protein CICLE_v1            | not DE   | not DE   | not DE   | not DE  |
| EVM0015516 | LG12 | hypothetical protein CICLE_v1            | not DE   | not DE   | not DE   | not DE  |
| EVM0020444 | LG12 | hypothetical protein CICLE_v1            | not DE   | not DE   | not DE   | not DE  |
| EVM0013494 | LG12 | hypothetical protein CICLE_v1            | not DE   | not DE   | not DE   | not DE  |
| EVM0006227 | LG12 | hypothetical protein CICLE_v1            | not DE   | not DE   | not DE   | not DE  |
| EVM0013967 | LG12 | hypothetical protein CICLE_v1            | not DE   | not DE   | -1.32208 | 0.01794 |
| EVM0012362 | LG12 | hypothetical protein CICLE_v1            | not DE   | not DE   | not DE   | not DE  |
| EVM0004632 | LG12 | hypothetical protein CICLE_v1            | not DE   | not DE   | not DE   | not DE  |
| EVM0004920 | LG12 | hypothetical protein CICLE_v1            | not DE   | not DE   | not DE   | not DE  |
| EVM0021872 | LG12 | hypothetical protein CICLE_v1            | not DE   | not DE   | not DE   | not DE  |
| EVM0009710 | LG12 | hypothetical protein CICLE_v1            | not DE   | not DE   | not DE   | not DE  |
| EVM0021600 | LG12 | hypothetical protein CICLE_v1            | not DE   | not DE   | not DE   | not DE  |
| EVM0007399 | LG12 | hypothetical protein CICLE_v1            | 1.61675  | 0.019223 | not DE   | not DE  |
| EVM0008664 | LG12 | hypothetical protein CICLE_v1            | not DE   | not DE   | not DE   | not DE  |
| EVM0015749 | LG12 | hypothetical protein CICLE_v1            | not DE   | not DE   | not DE   | not DE  |
| EVM0001354 | LG12 | hypothetical protein CICLE_v1            | not DE   | not DE   | not DE   | not DE  |
| EVM0023801 | LG12 | hypothetical protein CICLE_v1            | not DE   | not DE   | -1.05343 | #####   |
| EVM0004510 | LG12 | hypothetical protein CICLE_v1            | not DE   | not DE   | not DE   | not DE  |
| EVM0010998 | LG12 | hypothetical protein CICLE_v1            | not DE   | not DE   | not DE   | not DE  |
| EVM0012498 | LG12 | hypothetical protein CICLE_v1            | not DE   | not DE   | not DE   | not DE  |
| EVM0019122 | LG12 | hypothetical protein CICLE_v1            | not DE   | not DE   | not DE   | not DE  |
| EVM0022367 | LG12 | hypothetical protein CICLE_v1            | not DE   | not DE   | -1.13417 | #####   |
| EVM0019400 | LG12 | hypothetical protein CICLE_v1            | not DE   | not DE   | not DE   | not DE  |
| EVM0022555 | LG12 | hypothetical protein CICLE_v1            | not DE   | not DE   | not DE   | not DE  |
| EVM0008243 | LG12 | hypothetical protein CICLE_v1            | not DE   | not DE   | not DE   | not DE  |
| EVM0005526 | LG12 | hypothetical protein CICLE_v1            | 1.193375 | 0.000113 | not DE   | not DE  |

|            |      |                               |          |          |          |         |
|------------|------|-------------------------------|----------|----------|----------|---------|
| EVM0019107 | LG12 | hypothetical protein CICLE_v1 | not DE   | not DE   | not DE   | not DE  |
| EVM0004925 | LG12 | hypothetical protein CICLE_v1 | not DE   | not DE   | not DE   | not DE  |
| EVM0013816 | LG12 | hypothetical protein CICLE_v1 | not DE   | not DE   | not DE   | not DE  |
| EVM0014845 | LG12 | hypothetical protein CICLE_v1 | not DE   | not DE   | not DE   | not DE  |
| EVM0004263 | LG12 | hypothetical protein CICLE_v1 | not DE   | not DE   | not DE   | not DE  |
| EVM0010482 | LG12 | hypothetical protein CICLE_v1 | not DE   | not DE   | 1.132635 | 0.01386 |
| EVM0006584 | LG12 | hypothetical protein CICLE_v1 | not DE   | not DE   | not DE   | not DE  |
| EVM0001822 | LG12 | hypothetical protein CICLE_v1 | not DE   | not DE   | not DE   | not DE  |
| EVM0023884 | LG12 | hypothetical protein CICLE_v1 | not DE   | not DE   | not DE   | not DE  |
| EVM0017570 | LG12 | hypothetical protein CICLE_v1 | not DE   | not DE   | not DE   | not DE  |
| EVM0011303 | LG12 | hypothetical protein CICLE_v1 | not DE   | not DE   | not DE   | not DE  |
| EVM0000098 | LG12 | hypothetical protein CICLE_v1 | not DE   | not DE   | not DE   | not DE  |
| EVM0009587 | LG12 | hypothetical protein CICLE_v1 | not DE   | not DE   | not DE   | not DE  |
| EVM0015736 | LG12 | hypothetical protein CICLE_v1 | not DE   | not DE   | not DE   | not DE  |
| EVM0015835 | LG12 | hypothetical protein CICLE_v1 | not DE   | not DE   | not DE   | not DE  |
| EVM0016452 | LG12 | hypothetical protein CICLE_v1 | not DE   | not DE   | not DE   | not DE  |
| EVM0012367 | LG12 | hypothetical protein CICLE_v1 | not DE   | not DE   | not DE   | not DE  |
| EVM0011686 | LG12 | hypothetical protein CICLE_v1 | not DE   | not DE   | not DE   | not DE  |
| EVM0010181 | LG12 | hypothetical protein CICLE_v1 | not DE   | not DE   | not DE   | not DE  |
| EVM0006876 | LG12 | hypothetical protein CICLE_v1 | not DE   | not DE   | not DE   | not DE  |
| EVM0007889 | LG12 | hypothetical protein CICLE_v1 | not DE   | not DE   | not DE   | not DE  |
| EVM0005904 | LG12 | hypothetical protein CICLE_v1 | not DE   | not DE   | not DE   | not DE  |
| EVM0023966 | LG12 | hypothetical protein CICLE_v1 | 1.441469 | 0.002298 | not DE   | not DE  |
| EVM0011187 | LG12 | hypothetical protein CICLE_v1 | 1.882184 | 2.93E-06 | not DE   | not DE  |
| EVM0015928 | LG12 | hypothetical protein CICLE_v1 | not DE   | not DE   | not DE   | not DE  |
| EVM0003300 | LG12 | hypothetical protein CICLE_v1 | not DE   | not DE   | not DE   | not DE  |
| EVM0023654 | LG12 | hypothetical protein CICLE_v1 | not DE   | not DE   | not DE   | not DE  |
| EVM0006156 | LG12 | hypothetical protein CICLE_v1 | not DE   | not DE   | not DE   | not DE  |
| EVM0022865 | LG12 | hypothetical protein CICLE_v1 | not DE   | not DE   | not DE   | not DE  |
| EVM0000781 | LG12 | hypothetical protein CICLE_v1 | not DE   | not DE   | not DE   | not DE  |
| EVM0016438 | LG12 | hypothetical protein CICLE_v1 | not DE   | not DE   | not DE   | not DE  |
| EVM0009565 | LG12 | hypothetical protein CICLE_v1 | not DE   | not DE   | not DE   | not DE  |
| EVM0018139 | LG12 | hypothetical protein CICLE_v1 | not DE   | not DE   | not DE   | not DE  |
| EVM0014831 | LG12 | hypothetical protein CICLE_v1 | not DE   | not DE   | not DE   | not DE  |
| EVM0009434 | LG12 | hypothetical protein CICLE_v1 | not DE   | not DE   | not DE   | not DE  |
| EVM0006735 | LG12 | hypothetical protein CICLE_v1 | not DE   | not DE   | not DE   | not DE  |
| EVM0002970 | LG12 | hypothetical protein CICLE_v1 | not DE   | not DE   | not DE   | not DE  |
| EVM0001459 | LG12 | hypothetical protein CICLE_v1 | -1.38051 | 0.00081  | not DE   | not DE  |
| EVM0022718 | LG12 | hypothetical protein CICLE_v1 | not DE   | not DE   | not DE   | not DE  |
| EVM0018043 | LG12 | hypothetical protein CICLE_v1 | not DE   | not DE   | not DE   | not DE  |
| EVM0004127 | LG12 | hypothetical protein CICLE_v1 | not DE   | not DE   | not DE   | not DE  |
| EVM0006791 | LG12 | hypothetical protein CICLE_v1 | not DE   | not DE   | not DE   | not DE  |
| EVM0009941 | LG12 | hypothetical protein CICLE_v1 | not DE   | not DE   | not DE   | not DE  |
| EVM0010422 | LG12 | hypothetical protein CICLE_v1 | not DE   | not DE   | not DE   | not DE  |
| EVM0019837 | LG12 | hypothetical protein CICLE_v1 | not DE   | not DE   | not DE   | not DE  |
| EVM0023072 | LG12 | hypothetical protein CICLE_v1 | not DE   | not DE   | not DE   | not DE  |
| EVM0009322 | LG12 | hypothetical protein CICLE_v1 | 1.389639 | 2.02E-05 | not DE   | not DE  |
| EVM0006065 | LG12 | hypothetical protein CICLE_v1 | not DE   | not DE   | not DE   | not DE  |
| EVM0010269 | LG12 | hypothetical protein CICLE_v1 | not DE   | not DE   | not DE   | not DE  |
| EVM0005933 | LG12 | hypothetical protein CICLE_v1 | not DE   | not DE   | not DE   | not DE  |
| EVM0012589 | LG12 | hypothetical protein CICLE_v1 | not DE   | not DE   | not DE   | not DE  |
| EVM0021068 | LG12 | hypothetical protein CICLE_v1 | not DE   | not DE   | not DE   | not DE  |
| EVM0014364 | LG12 | hypothetical protein CICLE_v1 | not DE   | not DE   | not DE   | not DE  |
| EVM0012508 | LG12 | hypothetical protein CICLE_v1 | not DE   | not DE   | not DE   | not DE  |

|            |      |                               |          |          |          |         |
|------------|------|-------------------------------|----------|----------|----------|---------|
| EVM0011551 | LG12 | hypothetical protein CICLE_v1 | not DE   | not DE   | not DE   | not DE  |
| EVM0009849 | LG12 | hypothetical protein CICLE_v1 | not DE   | not DE   | not DE   | not DE  |
| EVM0009082 | LG12 | hypothetical protein CICLE_v1 | not DE   | not DE   | not DE   | not DE  |
| EVM0023524 | LG12 | hypothetical protein CICLE_v1 | not DE   | not DE   | not DE   | not DE  |
| EVM0020131 | LG12 | hypothetical protein CICLE_v1 | not DE   | not DE   | not DE   | not DE  |
| EVM0019118 | LG12 | hypothetical protein CICLE_v1 | 2.937191 | 4.17E-06 | not DE   | not DE  |
| EVM0017736 | LG12 | hypothetical protein CICLE_v1 | not DE   | not DE   | not DE   | not DE  |
| EVM0011874 | LG12 | hypothetical protein CICLE_v1 | not DE   | not DE   | not DE   | not DE  |
| EVM0016585 | LG12 | hypothetical protein CICLE_v1 | not DE   | not DE   | not DE   | not DE  |
| EVM0008852 | LG12 | hypothetical protein CICLE_v1 | not DE   | not DE   | not DE   | not DE  |
| EVM0024344 | LG12 | hypothetical protein CICLE_v1 | not DE   | not DE   | not DE   | not DE  |
| EVM0013016 | LG12 | hypothetical protein CICLE_v1 | not DE   | not DE   | not DE   | not DE  |
| EVM0022371 | LG12 | hypothetical protein CICLE_v1 | not DE   | not DE   | not DE   | not DE  |
| EVM0009621 | LG12 | hypothetical protein CICLE_v1 | not DE   | not DE   | not DE   | not DE  |
| EVM0022797 | LG12 | hypothetical protein CICLE_v1 | 1.281018 | 6.87E-08 | not DE   | not DE  |
| EVM0018298 | LG12 | hypothetical protein CICLE_v1 | not DE   | not DE   | not DE   | not DE  |
| EVM0016508 | LG12 | hypothetical protein CICLE_v1 | not DE   | not DE   | not DE   | not DE  |
| EVM0023050 | LG12 | hypothetical protein CICLE_v1 | not DE   | not DE   | not DE   | not DE  |
| EVM0021688 | LG12 | hypothetical protein CICLE_v1 | not DE   | not DE   | not DE   | not DE  |
| EVM0000132 | LG12 | hypothetical protein CICLE_v1 | not DE   | not DE   | not DE   | not DE  |
| EVM0001068 | LG12 | hypothetical protein CICLE_v1 | not DE   | not DE   | not DE   | not DE  |
| EVM0016014 | LG12 | hypothetical protein CICLE_v1 | not DE   | not DE   | not DE   | not DE  |
| EVM0020513 | LG12 | hypothetical protein CICLE_v1 | not DE   | not DE   | not DE   | not DE  |
| EVM0021127 | LG12 | hypothetical protein CICLE_v1 | not DE   | not DE   | not DE   | not DE  |
| EVM0023975 | LG12 | hypothetical protein CICLE_v1 | not DE   | not DE   | not DE   | not DE  |
| EVM0012046 | LG12 | hypothetical protein CICLE_v1 | not DE   | not DE   | not DE   | not DE  |
| EVM0002731 | LG12 | hypothetical protein CICLE_v1 | not DE   | not DE   | not DE   | not DE  |
| EVM0004714 | LG12 | hypothetical protein CICLE_v1 | not DE   | not DE   | not DE   | not DE  |
| EVM0006418 | LG12 | hypothetical protein CICLE_v1 | not DE   | not DE   | not DE   | not DE  |
| EVM0006325 | LG12 | hypothetical protein CICLE_v1 | not DE   | not DE   | not DE   | not DE  |
| EVM0008515 | LG12 | hypothetical protein CICLE_v1 | not DE   | not DE   | not DE   | not DE  |
| EVM0012196 | LG12 | hypothetical protein CICLE_v1 | not DE   | not DE   | -1.41913 | 0.00933 |
| EVM0001055 | LG12 | hypothetical protein CICLE_v1 | not DE   | not DE   | not DE   | not DE  |
| EVM0022863 | LG12 | hypothetical protein CICLE_v1 | not DE   | not DE   | not DE   | not DE  |
| EVM0001817 | LG12 | hypothetical protein CICLE_v1 | not DE   | not DE   | not DE   | not DE  |
| EVM0023007 | LG12 | hypothetical protein CICLE_v1 | -1.46964 | 1.34E-10 | not DE   | not DE  |
| EVM0019716 | LG12 | hypothetical protein CICLE_v1 | not DE   | not DE   | not DE   | not DE  |
| EVM0008390 | LG12 | hypothetical protein CICLE_v1 | not DE   | not DE   | not DE   | not DE  |
| EVM0013818 | LG12 | hypothetical protein CICLE_v1 | not DE   | not DE   | not DE   | not DE  |
| EVM0009041 | LG12 | hypothetical protein CICLE_v1 | not DE   | not DE   | not DE   | not DE  |
| EVM0017099 | LG12 | hypothetical protein CICLE_v1 | not DE   | not DE   | not DE   | not DE  |
| EVM0008183 | LG12 | hypothetical protein CICLE_v1 | not DE   | not DE   | 2.339788 | 0.00131 |
| EVM0000106 | LG12 | hypothetical protein CICLE_v1 | not DE   | not DE   | not DE   | not DE  |
| EVM0008400 | LG12 | hypothetical protein CICLE_v1 | not DE   | not DE   | not DE   | not DE  |
| EVM0015700 | LG12 | hypothetical protein CICLE_v1 | not DE   | not DE   | not DE   | not DE  |
| EVM0011864 | LG12 | hypothetical protein CICLE_v1 | not DE   | not DE   | not DE   | not DE  |
| EVM0017378 | LG12 | hypothetical protein CICLE_v1 | not DE   | not DE   | not DE   | not DE  |
| EVM0007173 | LG12 | hypothetical protein CICLE_v1 | not DE   | not DE   | not DE   | not DE  |
| EVM0010994 | LG12 | hypothetical protein CICLE_v1 | not DE   | not DE   | not DE   | not DE  |
| EVM0024591 | LG12 | hypothetical protein CICLE_v1 | not DE   | not DE   | not DE   | not DE  |
| EVM0009883 | LG12 | hypothetical protein CICLE_v1 | not DE   | not DE   | not DE   | not DE  |
| EVM0016649 | LG12 | hypothetical protein CICLE_v1 | not DE   | not DE   | not DE   | not DE  |
| EVM0006572 | LG12 | hypothetical protein CICLE_v1 | not DE   | not DE   | not DE   | not DE  |
| EVM0007437 | LG12 | hypothetical protein CICLE_v1 | not DE   | not DE   | 1.329088 | 0.0419  |

|            |      |                               |          |          |          |         |
|------------|------|-------------------------------|----------|----------|----------|---------|
| EVM0010124 | LG12 | hypothetical protein CICLE_v1 | not DE   | not DE   | not DE   | not DE  |
| EVM0013556 | LG12 | hypothetical protein CICLE_v1 | not DE   | not DE   | not DE   | not DE  |
| EVM0008283 | LG12 | hypothetical protein CICLE_v1 | not DE   | not DE   | not DE   | not DE  |
| EVM0010680 | LG12 | hypothetical protein CICLE_v1 | not DE   | not DE   | not DE   | not DE  |
| EVM0013512 | LG12 | hypothetical protein CICLE_v1 | not DE   | not DE   | not DE   | not DE  |
| EVM0002909 | LG12 | hypothetical protein CICLE_v1 | not DE   | not DE   | not DE   | not DE  |
| EVM0005180 | LG12 | hypothetical protein CICLE_v1 | not DE   | not DE   | not DE   | not DE  |
| EVM0008649 | LG12 | hypothetical protein CICLE_v1 | not DE   | not DE   | not DE   | not DE  |
| EVM0002078 | LG12 | hypothetical protein CICLE_v1 | not DE   | not DE   | not DE   | not DE  |
| EVM0005546 | LG12 | hypothetical protein CICLE_v1 | not DE   | not DE   | not DE   | not DE  |
| EVM0016878 | LG12 | hypothetical protein CICLE_v1 | not DE   | not DE   | not DE   | not DE  |
| EVM0018016 | LG12 | hypothetical protein CICLE_v1 | not DE   | not DE   | not DE   | not DE  |
| EVM0016114 | LG12 | hypothetical protein CICLE_v1 | not DE   | not DE   | not DE   | not DE  |
| EVM0007245 | LG12 | hypothetical protein CICLE_v1 | not DE   | not DE   | 1.96511  | 0.00724 |
| EVM0004380 | LG12 | hypothetical protein CICLE_v1 | not DE   | not DE   | not DE   | not DE  |
| EVM0018119 | LG12 | hypothetical protein CICLE_v1 | not DE   | not DE   | not DE   | not DE  |
| EVM0008488 | LG12 | hypothetical protein CICLE_v1 | not DE   | not DE   | not DE   | not DE  |
| EVM0003696 | LG12 | hypothetical protein CICLE_v1 | not DE   | not DE   | not DE   | not DE  |
| EVM0015424 | LG12 | hypothetical protein CICLE_v1 | not DE   | not DE   | not DE   | not DE  |
| EVM0001356 | LG12 | hypothetical protein CICLE_v1 | not DE   | not DE   | not DE   | not DE  |
| EVM0007028 | LG12 | hypothetical protein CICLE_v1 | not DE   | not DE   | not DE   | not DE  |
| EVM0009112 | LG12 | hypothetical protein CICLE_v1 | not DE   | not DE   | not DE   | not DE  |
| EVM0022434 | LG12 | hypothetical protein CICLE_v1 | not DE   | not DE   | 1.105419 | 0.04178 |
| EVM0012430 | LG12 | hypothetical protein CICLE_v1 | not DE   | not DE   | not DE   | not DE  |
| EVM0017376 | LG12 | hypothetical protein CICLE_v1 | not DE   | not DE   | 1.111782 | #####   |
| EVM0002057 | LG12 | hypothetical protein CICLE_v1 | not DE   | not DE   | not DE   | not DE  |
| EVM0016490 | LG12 | hypothetical protein CICLE_v1 | not DE   | not DE   | not DE   | not DE  |
| EVM0007866 | LG12 | hypothetical protein CICLE_v1 | not DE   | not DE   | not DE   | not DE  |
| EVM0005914 | LG12 | hypothetical protein CICLE_v1 | not DE   | not DE   | not DE   | not DE  |
| EVM0021690 | LG12 | hypothetical protein CICLE_v1 | not DE   | not DE   | not DE   | not DE  |
| EVM0008975 | LG12 | hypothetical protein CICLE_v1 | not DE   | not DE   | not DE   | not DE  |
| EVM0011412 | LG12 | hypothetical protein CICLE_v1 | not DE   | not DE   | not DE   | not DE  |
| EVM0014699 | LG12 | hypothetical protein CICLE_v1 | not DE   | not DE   | not DE   | not DE  |
| EVM0018576 | LG12 | hypothetical protein CICLE_v1 | not DE   | not DE   | not DE   | not DE  |
| EVM0022303 | LG12 | hypothetical protein CICLE_v1 | not DE   | not DE   | not DE   | not DE  |
| EVM0023023 | LG12 | hypothetical protein CICLE_v1 | not DE   | not DE   | not DE   | not DE  |
| EVM0004142 | LG12 | hypothetical protein CICLE_v1 | not DE   | not DE   | not DE   | not DE  |
| EVM0007727 | LG12 | hypothetical protein CICLE_v1 | not DE   | not DE   | not DE   | not DE  |
| EVM0007438 | LG12 | hypothetical protein CICLE_v1 | not DE   | not DE   | not DE   | not DE  |
| EVM0012537 | LG12 | hypothetical protein CICLE_v1 | not DE   | not DE   | not DE   | not DE  |
| EVM0018130 | LG12 | hypothetical protein CICLE_v1 | 2.548262 | 0.026842 | not DE   | not DE  |
| EVM0000347 | LG12 | hypothetical protein CICLE_v1 | not DE   | not DE   | not DE   | not DE  |
| EVM0000020 | LG12 | hypothetical protein CICLE_v1 | not DE   | not DE   | not DE   | not DE  |
| EVM0005901 | LG12 | hypothetical protein CICLE_v1 | not DE   | not DE   | not DE   | not DE  |
| EVM0005668 | LG12 | hypothetical protein CICLE_v1 | not DE   | not DE   | not DE   | not DE  |
| EVM0000471 | LG12 | hypothetical protein CICLE_v1 | not DE   | not DE   | not DE   | not DE  |
| EVM0021822 | LG12 | hypothetical protein CICLE_v1 | not DE   | not DE   | not DE   | not DE  |
| EVM0006713 | LG12 | hypothetical protein CICLE_v1 | not DE   | not DE   | not DE   | not DE  |
| EVM0023341 | LG12 | hypothetical protein CICLE_v1 | not DE   | not DE   | not DE   | not DE  |
| EVM0005822 | LG12 | hypothetical protein CICLE_v1 | not DE   | not DE   | not DE   | not DE  |
| EVM0004520 | LG12 | hypothetical protein CICLE_v1 | not DE   | not DE   | not DE   | not DE  |
| EVM0005069 | LG12 | hypothetical protein CICLE_v1 | not DE   | not DE   | not DE   | not DE  |
| EVM0012188 | LG12 | hypothetical protein CICLE_v1 | not DE   | not DE   | not DE   | not DE  |
| EVM0008369 | LG12 | hypothetical protein CICLE_v1 | not DE   | not DE   | not DE   | not DE  |



|            |      |                               |          |          |          |         |
|------------|------|-------------------------------|----------|----------|----------|---------|
| EVM0012596 | LG12 | hypothetical protein CICLE_v1 | not DE   | not DE   | not DE   | not DE  |
| EVM0003766 | LG12 | hypothetical protein CICLE_v1 | 1.0492   | 0.021581 | not DE   | not DE  |
| EVM0003364 | LG12 | hypothetical protein CICLE_v1 | not DE   | not DE   | not DE   | not DE  |
| EVM0008976 | LG12 | hypothetical protein CICLE_v1 | not DE   | not DE   | not DE   | not DE  |
| EVM0000553 | LG12 | hypothetical protein CICLE_v1 | not DE   | not DE   | not DE   | not DE  |
| EVM0001131 | LG12 | hypothetical protein CICLE_v1 | not DE   | not DE   | not DE   | not DE  |
| EVM0006305 | LG12 | hypothetical protein CICLE_v1 | not DE   | not DE   | not DE   | not DE  |
| EVM0020370 | LG12 | hypothetical protein CICLE_v1 | -1.3583  | 0.024128 | -1.00263 | 0.00534 |
| EVM0016411 | LG12 | hypothetical protein CICLE_v1 | not DE   | not DE   | not DE   | not DE  |
| EVM0005423 | LG12 | hypothetical protein CICLE_v1 | 1.87996  | 0.000386 | not DE   | not DE  |
| EVM0019027 | LG12 | hypothetical protein CICLE_v1 | not DE   | not DE   | not DE   | not DE  |
| EVM0014233 | LG12 | hypothetical protein CICLE_v1 | not DE   | not DE   | not DE   | not DE  |
| EVM0015910 | LG12 | hypothetical protein CICLE_v1 | not DE   | not DE   | not DE   | not DE  |
| EVM0019128 | LG12 | hypothetical protein CICLE_v1 | not DE   | not DE   | 1.066661 | 0.00856 |
| EVM0023906 | LG12 | hypothetical protein CICLE_v1 | not DE   | not DE   | not DE   | not DE  |
| EVM0002230 | LG12 | hypothetical protein CICLE_v1 | not DE   | not DE   | not DE   | not DE  |
| EVM0013806 | LG12 | hypothetical protein CICLE_v1 | not DE   | not DE   | not DE   | not DE  |
| EVM0003370 | LG12 | hypothetical protein CICLE_v1 | not DE   | not DE   | not DE   | not DE  |
| EVM0006498 | LG12 | hypothetical protein CICLE_v1 | not DE   | not DE   | not DE   | not DE  |
| EVM0005760 | LG12 | hypothetical protein CICLE_v1 | not DE   | not DE   | not DE   | not DE  |
| EVM0004431 | LG12 | hypothetical protein CICLE_v1 | not DE   | not DE   | not DE   | not DE  |
| EVM0012451 | LG12 | hypothetical protein CICLE_v1 | not DE   | not DE   | not DE   | not DE  |
| EVM0015962 | LG12 | hypothetical protein CICLE_v1 | not DE   | not DE   | not DE   | not DE  |
| EVM0007381 | LG12 | hypothetical protein CICLE_v1 | 2.094796 | 0.01803  | not DE   | not DE  |
| EVM0019363 | LG12 | hypothetical protein CICLE_v1 | not DE   | not DE   | not DE   | not DE  |
| EVM0009833 | LG12 | hypothetical protein CICLE_v1 | not DE   | not DE   | not DE   | not DE  |
| EVM0011524 | LG12 | hypothetical protein CICLE_v1 | not DE   | not DE   | not DE   | not DE  |
| EVM0016726 | LG12 | hypothetical protein CICLE_v1 | not DE   | not DE   | not DE   | not DE  |
| EVM0005426 | LG12 | hypothetical protein CICLE_v1 | -2.55541 | 0.004511 | not DE   | not DE  |
| EVM0019814 | LG12 | hypothetical protein CICLE_v1 | not DE   | not DE   | not DE   | not DE  |
| EVM0007411 | LG12 | hypothetical protein CICLE_v1 | not DE   | not DE   | not DE   | not DE  |
| EVM0016361 | LG12 | hypothetical protein CICLE_v1 | not DE   | not DE   | not DE   | not DE  |
| EVM0010103 | LG12 | hypothetical protein CICLE_v1 | not DE   | not DE   | not DE   | not DE  |
| EVM0002392 | LG12 | hypothetical protein CICLE_v1 | not DE   | not DE   | not DE   | not DE  |
| EVM0024283 | LG12 | hypothetical protein CICLE_v1 | not DE   | not DE   | not DE   | not DE  |
| EVM0014106 | LG12 | hypothetical protein CICLE_v1 | 1.104203 | 0.008257 | not DE   | not DE  |
| EVM0006884 | LG12 | hypothetical protein CICLE_v1 | not DE   | not DE   | not DE   | not DE  |
| EVM0015117 | LG12 | hypothetical protein CICLE_v1 | not DE   | not DE   | not DE   | not DE  |
| EVM0011345 | LG12 | hypothetical protein CICLE_v1 | not DE   | not DE   | not DE   | not DE  |
| EVM0000727 | LG12 | hypothetical protein CICLE_v1 | not DE   | not DE   | not DE   | not DE  |
| EVM0012418 | LG12 | hypothetical protein CICLE_v1 | not DE   | not DE   | not DE   | not DE  |
| EVM0018212 | LG12 | hypothetical protein CICLE_v1 | not DE   | not DE   | not DE   | not DE  |
| EVM0002695 | LG12 | hypothetical protein CICLE_v1 | not DE   | not DE   | not DE   | not DE  |
| EVM0007570 | LG12 | hypothetical protein CICLE_v1 | not DE   | not DE   | not DE   | not DE  |
| EVM0002645 | LG12 | hypothetical protein CICLE_v1 | not DE   | not DE   | not DE   | not DE  |
| EVM0018398 | LG12 | hypothetical protein CICLE_v1 | not DE   | not DE   | not DE   | not DE  |
| EVM0018098 | LG12 | hypothetical protein CICLE_v1 | not DE   | not DE   | not DE   | not DE  |
| EVM0019265 | LG12 | hypothetical protein CICLE_v1 | not DE   | not DE   | not DE   | not DE  |
| EVM0009973 | LG12 | hypothetical protein CICLE_v1 | not DE   | not DE   | not DE   | not DE  |
| EVM0020623 | LG12 | hypothetical protein CICLE_v1 | not DE   | not DE   | -1.12567 | 0.04833 |
| EVM0020460 | LG12 | hypothetical protein CICLE_v1 | not DE   | not DE   | 1.414235 | 0.02711 |
| EVM0012335 | LG12 | hypothetical protein CICLE_v1 | not DE   | not DE   | not DE   | not DE  |
| EVM0019805 | LG12 | hypothetical protein CICLE_v1 | -1.81322 | 0.015752 | not DE   | not DE  |
| EVM0006473 | LG12 | hypothetical protein CICLE_v1 | not DE   | not DE   | not DE   | not DE  |

|            |      |                               |          |          |          |        |
|------------|------|-------------------------------|----------|----------|----------|--------|
| EVM0022904 | LG12 | hypothetical protein CICLE_v1 | not DE   | not DE   | not DE   | not DE |
| EVM0017020 | LG12 | hypothetical protein CICLE_v1 | not DE   | not DE   | 2.139111 | 0.0292 |
| EVM0018095 | LG12 | hypothetical protein CICLE_v1 | not DE   | not DE   | not DE   | not DE |
| EVM0008943 | LG12 | hypothetical protein CICLE_v1 | not DE   | not DE   | not DE   | not DE |
| EVM0023425 | LG12 | hypothetical protein CICLE_v1 | -1.53268 | 0.001396 | not DE   | not DE |
| EVM0001171 | LG12 | hypothetical protein CICLE_v1 | not DE   | not DE   | not DE   | not DE |
| EVM0018056 | LG12 | hypothetical protein CICLE_v1 | not DE   | not DE   | not DE   | not DE |
| EVM0010667 | LG12 | hypothetical protein CICLE_v1 | not DE   | not DE   | not DE   | not DE |
| EVM0020284 | LG12 | hypothetical protein CICLE_v1 | not DE   | not DE   | not DE   | not DE |
| EVM0021956 | LG12 | hypothetical protein CICLE_v1 | not DE   | not DE   | not DE   | not DE |
| EVM0009921 | LG12 | hypothetical protein CICLE_v1 | not DE   | not DE   | not DE   | not DE |
| EVM0011020 | LG12 | hypothetical protein CICLE_v1 | not DE   | not DE   | not DE   | not DE |
| EVM0024247 | LG12 | hypothetical protein CICLE_v1 | not DE   | not DE   | not DE   | not DE |
| EVM0015336 | LG12 | hypothetical protein CICLE_v1 | not DE   | not DE   | not DE   | not DE |
| EVM0022704 | LG12 | hypothetical protein CICLE_v1 | not DE   | not DE   | not DE   | not DE |
| EVM0009020 | LG12 | hypothetical protein CICLE_v1 | not DE   | not DE   | not DE   | not DE |
| EVM0016531 | LG12 | hypothetical protein CICLE_v1 | not DE   | not DE   | not DE   | not DE |
| EVM0024575 | LG12 | hypothetical protein CICLE_v1 | not DE   | not DE   | not DE   | not DE |
| EVM0007590 | LG12 | hypothetical protein CICLE_v1 | not DE   | not DE   | not DE   | not DE |
| EVM0012884 | LG12 | hypothetical protein CICLE_v1 | not DE   | not DE   | not DE   | not DE |
| EVM0022433 | LG12 | hypothetical protein CICLE_v1 | not DE   | not DE   | not DE   | not DE |
| EVM0002776 | LG12 | hypothetical protein CICLE_v1 | 2.971676 | 0.00094  | not DE   | not DE |
| EVM0001610 | LG12 | hypothetical protein CICLE_v1 | not DE   | not DE   | not DE   | not DE |
| EVM0001165 | LG12 | hypothetical protein CICLE_v1 | not DE   | not DE   | not DE   | not DE |
| EVM0016197 | LG12 | hypothetical protein CICLE_v1 | not DE   | not DE   | not DE   | not DE |
| EVM0011866 | LG12 | hypothetical protein CICLE_v1 | not DE   | not DE   | not DE   | not DE |
| EVM0015134 | LG12 | hypothetical protein CICLE_v1 | not DE   | not DE   | not DE   | not DE |
| EVM0014425 | LG12 | hypothetical protein CICLE_v1 | not DE   | not DE   | not DE   | not DE |
| EVM0010576 | LG12 | hypothetical protein CICLE_v1 | not DE   | not DE   | not DE   | not DE |
| EVM0023158 | LG12 | hypothetical protein CICLE_v1 | not DE   | not DE   | not DE   | not DE |
| EVM0013492 | LG12 | hypothetical protein CICLE_v1 | not DE   | not DE   | not DE   | not DE |
| EVM0012002 | LG12 | hypothetical protein CICLE_v1 | not DE   | not DE   | not DE   | not DE |
| EVM0001960 | LG12 | hypothetical protein CICLE_v1 | not DE   | not DE   | not DE   | not DE |
| EVM0011433 | LG12 | hypothetical protein CICLE_v1 | not DE   | not DE   | not DE   | not DE |
| EVM0023127 | LG12 | hypothetical protein CICLE_v1 | not DE   | not DE   | not DE   | not DE |
| EVM0018376 | LG12 | hypothetical protein CICLE_v1 | not DE   | not DE   | not DE   | not DE |
| EVM0006396 | LG12 | hypothetical protein CICLE_v1 | not DE   | not DE   | not DE   | not DE |
| EVM0008471 | LG12 | hypothetical protein CICLE_v1 | -4.02794 | 6.03E-05 | not DE   | not DE |
| EVM0006142 | LG12 | hypothetical protein CICLE_v1 | not DE   | not DE   | not DE   | not DE |
| EVM0022977 | LG12 | hypothetical protein CICLE_v1 | not DE   | not DE   | not DE   | not DE |
| EVM0001682 | LG12 | hypothetical protein CICLE_v1 | not DE   | not DE   | not DE   | not DE |
| EVM0023665 | LG12 | hypothetical protein CICLE_v1 | not DE   | not DE   | not DE   | not DE |
| EVM0010615 | LG12 | hypothetical protein CISIN_1g | not DE   | not DE   | not DE   | not DE |
| EVM0002442 | LG12 | hypothetical protein CISIN_1g | not DE   | not DE   | not DE   | not DE |
| EVM0000220 | LG12 | hypothetical protein CISIN_1g | not DE   | not DE   | not DE   | not DE |
| EVM0012894 | LG12 | hypothetical protein CISIN_1g | not DE   | not DE   | not DE   | not DE |
| EVM0013116 | LG12 | hypothetical protein CISIN_1g | not DE   | not DE   | not DE   | not DE |
| EVM0021752 | LG12 | hypothetical protein CISIN_1g | not DE   | not DE   | not DE   | not DE |
| EVM0022749 | LG12 | hypothetical protein CISIN_1g | not DE   | not DE   | not DE   | not DE |
| EVM0016783 | LG12 | hypothetical protein CISIN_1g | not DE   | not DE   | not DE   | not DE |
| EVM0013683 | LG12 | hypothetical protein CISIN_1g | not DE   | not DE   | not DE   | not DE |
| EVM0017130 | LG12 | hypothetical protein CISIN_1g | not DE   | not DE   | not DE   | not DE |
| EVM0001209 | LG12 | hypothetical protein CISIN_1g | not DE   | not DE   | not DE   | not DE |
| EVM0005216 | LG12 | hypothetical protein CISIN_1g | not DE   | not DE   | not DE   | not DE |

|            |      |                               |          |          |          |         |
|------------|------|-------------------------------|----------|----------|----------|---------|
| EVM0001449 | LG12 | hypothetical protein CISIN_1g | not DE   | not DE   | not DE   | not DE  |
| EVM0017868 | LG12 | hypothetical protein CISIN_1g | not DE   | not DE   | not DE   | not DE  |
| EVM0002699 | LG12 | hypothetical protein CISIN_1g | 1.257073 | 0.037752 | not DE   | not DE  |
| EVM0003091 | LG12 | hypothetical protein CISIN_1g | not DE   | not DE   | not DE   | not DE  |
| EVM0012597 | LG12 | hypothetical protein CISIN_1g | not DE   | not DE   | not DE   | not DE  |
| EVM0015727 | LG12 | hypothetical protein CISIN_1g | 1.673441 | 1.82E-06 | not DE   | not DE  |
| EVM0012016 | LG12 | hypothetical protein CISIN_1g | not DE   | not DE   | not DE   | not DE  |
| EVM0021799 | LG12 | hypothetical protein CISIN_1g | not DE   | not DE   | not DE   | not DE  |
| EVM0007951 | LG12 | hypothetical protein CISIN_1g | not DE   | not DE   | not DE   | not DE  |
| EVM0014777 | LG12 | hypothetical protein CISIN_1g | not DE   | not DE   | not DE   | not DE  |
| EVM0000660 | LG12 | hypothetical protein CISIN_1g | not DE   | not DE   | not DE   | not DE  |
| EVM0020467 | LG12 | hypothetical protein CISIN_1g | not DE   | not DE   | not DE   | not DE  |
| EVM0016018 | LG12 | hypothetical protein CISIN_1g | not DE   | not DE   | not DE   | not DE  |
| EVM0022446 | LG12 | hypothetical protein CISIN_1g | not DE   | not DE   | not DE   | not DE  |
| EVM0012086 | LG12 | hypothetical protein CISIN_1g | not DE   | not DE   | not DE   | not DE  |
| EVM0003175 | LG12 | hypothetical protein CISIN_1g | not DE   | not DE   | not DE   | not DE  |
| EVM0002068 | LG12 | hypothetical protein CISIN_1g | not DE   | not DE   | not DE   | not DE  |
| EVM0019231 | LG12 | hypothetical protein CISIN_1g | not DE   | not DE   | not DE   | not DE  |
| EVM0010071 | LG12 | hypothetical protein CISIN_1g | not DE   | not DE   | not DE   | not DE  |
| EVM0003168 | LG12 | hypothetical protein CISIN_1g | -1.10354 | 0.010366 | not DE   | not DE  |
| EVM0011257 | LG12 | hypothetical protein CISIN_1g | not DE   | not DE   | not DE   | not DE  |
| EVM0016254 | LG12 | hypothetical protein CISIN_1g | not DE   | not DE   | not DE   | not DE  |
| EVM0001568 | LG12 | hypothetical protein CISIN_1g | not DE   | not DE   | not DE   | not DE  |
| EVM0010357 | LG12 | hypothetical protein CISIN_1g | not DE   | not DE   | not DE   | not DE  |
| EVM0011972 | LG12 | hypothetical protein CISIN_1g | -2.67284 | 0.007105 | not DE   | not DE  |
| EVM0006462 | LG12 | hypothetical protein CISIN_1g | not DE   | not DE   | not DE   | not DE  |
| EVM0003063 | LG12 | hypothetical protein CISIN_1g | not DE   | not DE   | not DE   | not DE  |
| EVM0002435 | LG12 | hypothetical protein CISIN_1g | not DE   | not DE   | not DE   | not DE  |
| EVM0022268 | LG12 | hypothetical protein CISIN_1g | -1.11223 | 0.000154 | not DE   | not DE  |
| EVM0011658 | LG12 | hypothetical protein CISIN_1g | not DE   | not DE   | not DE   | not DE  |
| EVM0018702 | LG12 | hypothetical protein CISIN_1g | not DE   | not DE   | not DE   | not DE  |
| EVM0003589 | LG12 | hypothetical protein CISIN_1g | not DE   | not DE   | not DE   | not DE  |
| EVM0004454 | LG12 | hypothetical protein CISIN_1g | not DE   | not DE   | not DE   | not DE  |
| EVM0011561 | LG12 | hypothetical protein CISIN_1g | not DE   | not DE   | not DE   | not DE  |
| EVM0015667 | LG12 | hypothetical protein CISIN_1g | not DE   | not DE   | 1.271499 | 0.00871 |
| EVM0007984 | LG12 | hypothetical protein CISIN_1g | not DE   | not DE   | not DE   | not DE  |
| EVM0010772 | LG12 | hypothetical protein CISIN_1g | not DE   | not DE   | 1.631797 | #####   |
| EVM0024519 | LG12 | hypothetical protein CISIN_1g | not DE   | not DE   | not DE   | not DE  |
| EVM0020024 | LG12 | hypothetical protein CISIN_1g | not DE   | not DE   | not DE   | not DE  |
| EVM0021735 | LG12 | hypothetical protein CISIN_1g | not DE   | not DE   | not DE   | not DE  |
| EVM0016236 | LG12 | hypothetical protein CISIN_1g | not DE   | not DE   | not DE   | not DE  |
| EVM0007275 | LG12 | hypothetical protein CISIN_1g | not DE   | not DE   | not DE   | not DE  |
| EVM0011838 | LG12 | hypothetical protein CISIN_1g | 1.777821 | 0.02459  | not DE   | not DE  |
| EVM0015422 | LG12 | hypothetical protein CISIN_1g | not DE   | not DE   | not DE   | not DE  |
| EVM0002571 | LG12 | hypothetical protein CISIN_1g | -1.24495 | 0.014302 | not DE   | not DE  |
| EVM0017646 | LG12 | hypothetical protein CISIN_1g | not DE   | not DE   | not DE   | not DE  |
| EVM0012835 | LG12 | hypothetical protein CISIN_1g | not DE   | not DE   | not DE   | not DE  |
| EVM0003469 | LG12 | hypothetical protein CISIN_1g | not DE   | not DE   | not DE   | not DE  |
| EVM0003649 | LG12 | hypothetical protein CISIN_1g | 1.295431 | 0.014583 | 1.28348  | 0.00014 |
| EVM0009644 | LG12 | hypothetical protein CISIN_1g | not DE   | not DE   | not DE   | not DE  |
| EVM0000607 | LG12 | hypothetical protein CISIN_1g | not DE   | not DE   | not DE   | not DE  |
| EVM0000690 | LG12 | hypothetical protein CISIN_1g | not DE   | not DE   | not DE   | not DE  |
| EVM0012784 | LG12 | hypothetical protein CISIN_1g | not DE   | not DE   | not DE   | not DE  |
| EVM0004201 | LG12 | hypothetical protein CISIN_1g | not DE   | not DE   | not DE   | not DE  |

|            |      |                               |        |        |          |         |
|------------|------|-------------------------------|--------|--------|----------|---------|
| EVM0003062 | LG12 | hypothetical protein CISIN_1g | not DE | not DE | not DE   | not DE  |
| EVM0004052 | LG12 | hypothetical protein CISIN_1g | not DE | not DE | not DE   | not DE  |
| EVM0009217 | LG12 | hypothetical protein CISIN_1g | not DE | not DE | not DE   | not DE  |
| EVM0021734 | LG12 | hypothetical protein CISIN_1g | not DE | not DE | not DE   | not DE  |
| EVM0024501 | LG12 | hypothetical protein CISIN_1g | not DE | not DE | not DE   | not DE  |
| EVM0005097 | LG12 | hypothetical protein CISIN_1g | not DE | not DE | not DE   | not DE  |
| EVM0005712 | LG12 | hypothetical protein CISIN_1g | not DE | not DE | not DE   | not DE  |
| EVM0014966 | LG12 | hypothetical protein CISIN_1g | not DE | not DE | not DE   | not DE  |
| EVM0012914 | LG12 | hypothetical protein CISIN_1g | not DE | not DE | not DE   | not DE  |
| EVM0020552 | LG12 | hypothetical protein CISIN_1g | not DE | not DE | not DE   | not DE  |
| EVM0011895 | LG12 | hypothetical protein CISIN_1g | not DE | not DE | not DE   | not DE  |
| EVM0003360 | LG12 | hypothetical protein CISIN_1g | not DE | not DE | not DE   | not DE  |
| EVM0024469 | LG12 | hypothetical protein CISIN_1g | not DE | not DE | not DE   | not DE  |
| EVM0007156 | LG12 | hypothetical protein CISIN_1g | not DE | not DE | not DE   | not DE  |
| EVM0016710 | LG12 | hypothetical protein CISIN_1g | not DE | not DE | not DE   | not DE  |
| EVM0021046 | LG12 | hypothetical protein CISIN_1g | not DE | not DE | not DE   | not DE  |
| EVM0000521 | LG12 | hypothetical protein CISIN_1g | not DE | not DE | not DE   | not DE  |
| EVM0015337 | LG12 | hypothetical protein CISIN_1g | not DE | not DE | not DE   | not DE  |
| EVM0006422 | LG12 | hypothetical protein CISIN_1g | not DE | not DE | not DE   | not DE  |
| EVM0008736 | LG12 | hypothetical protein CISIN_1g | not DE | not DE | not DE   | not DE  |
| EVM0014441 | LG12 | hypothetical protein CISIN_1g | not DE | not DE | not DE   | not DE  |
| EVM0012022 | LG12 | hypothetical protein CISIN_1g | not DE | not DE | not DE   | not DE  |
| EVM0012637 | LG12 | hypothetical protein CISIN_1g | not DE | not DE | not DE   | not DE  |
| EVM0015013 | LG12 | hypothetical protein CISIN_1g | not DE | not DE | not DE   | not DE  |
| EVM0020205 | LG12 | hypothetical protein CISIN_1g | not DE | not DE | 2.783173 | 0.03995 |
| EVM0010732 | LG12 | hypothetical protein CISIN_1g | not DE | not DE | not DE   | not DE  |
| EVM0013786 | LG12 | hypothetical protein CISIN_1g | not DE | not DE | -1.01765 | 0.00032 |
| EVM0010812 | LG12 | hypothetical protein CISIN_1g | not DE | not DE | not DE   | not DE  |
| EVM0024052 | LG12 | hypothetical protein CISIN_1g | not DE | not DE | not DE   | not DE  |
| EVM0007487 | LG12 | hypothetical protein CISIN_1g | not DE | not DE | not DE   | not DE  |
| EVM0003170 | LG12 | hypothetical protein CISIN_1g | not DE | not DE | not DE   | not DE  |
| EVM0022421 | LG12 | hypothetical protein CISIN_1g | not DE | not DE | not DE   | not DE  |
| EVM0000037 | LG12 | hypothetical protein CISIN_1g | not DE | not DE | not DE   | not DE  |
| EVM0008909 | LG12 | hypothetical protein CISIN_1g | not DE | not DE | not DE   | not DE  |
| EVM0014675 | LG12 | hypothetical protein CISIN_1g | not DE | not DE | not DE   | not DE  |
| EVM0020194 | LG12 | hypothetical protein CISIN_1g | not DE | not DE | not DE   | not DE  |
| EVM0012194 | LG12 | hypothetical protein CISIN_1g | not DE | not DE | not DE   | not DE  |
| EVM0000018 | LG12 | hypothetical protein CISIN_1g | not DE | not DE | not DE   | not DE  |
| EVM0008152 | LG12 | hypothetical protein CISIN_1g | not DE | not DE | not DE   | not DE  |
| EVM0005185 | LG12 | hypothetical protein CISIN_1g | not DE | not DE | not DE   | not DE  |
| EVM0021180 | LG12 | hypothetical protein CISIN_1g | not DE | not DE | not DE   | not DE  |
| EVM0023297 | LG12 | hypothetical protein CISIN_1g | not DE | not DE | not DE   | not DE  |
| EVM0019761 | LG12 | hypothetical protein CISIN_1g | not DE | not DE | not DE   | not DE  |
| EVM0003835 | LG12 | hypothetical protein CISIN_1g | not DE | not DE | -1.50287 | 0.00285 |
| EVM0005718 | LG12 | hypothetical protein EUGRSUZ  | not DE | not DE | not DE   | not DE  |
| EVM0000420 | LG12 | hypothetical protein EUTSA_v1 | not DE | not DE | not DE   | not DE  |
| EVM0000101 | LG12 | hypothetical protein F383_099 | not DE | not DE | not DE   | not DE  |
| EVM0015254 | LG12 | hypothetical protein JCGZ_019 | not DE | not DE | not DE   | not DE  |
| EVM0022408 | LG12 | hypothetical protein JCGZ_063 | not DE | not DE | not DE   | not DE  |
| EVM0002209 | LG12 | hypothetical protein JCGZ_065 | not DE | not DE | not DE   | not DE  |
| EVM0014895 | LG12 | hypothetical protein JCGZ_067 | not DE | not DE | not DE   | not DE  |
| EVM0000466 | LG12 | hypothetical protein JCGZ_095 | not DE | not DE | not DE   | not DE  |
| EVM0005158 | LG12 | hypothetical protein JCGZ_104 | not DE | not DE | not DE   | not DE  |
| EVM0015916 | LG12 | hypothetical protein JCGZ_105 | not DE | not DE | not DE   | not DE  |

|            |      |                               |          |          |          |         |
|------------|------|-------------------------------|----------|----------|----------|---------|
| EVM0014281 | LG12 | hypothetical protein JCGZ_105 | not DE   | not DE   | not DE   | not DE  |
| EVM0022864 | LG12 | hypothetical protein JCGZ_105 | not DE   | not DE   | not DE   | not DE  |
| EVM0002947 | LG12 | hypothetical protein JCGZ_105 | not DE   | not DE   | not DE   | not DE  |
| EVM0019267 | LG12 | hypothetical protein JCGZ_133 | not DE   | not DE   | -1.20824 | 0.00112 |
| EVM0012262 | LG12 | hypothetical protein JCGZ_134 | not DE   | not DE   | not DE   | not DE  |
| EVM0019790 | LG12 | hypothetical protein JCGZ_182 | not DE   | not DE   | not DE   | not DE  |
| EVM0003667 | LG12 | hypothetical protein JCGZ_205 | not DE   | not DE   | not DE   | not DE  |
| EVM0009747 | LG12 | hypothetical protein JCGZ_210 | not DE   | not DE   | not DE   | not DE  |
| EVM0015284 | LG12 | hypothetical protein JCGZ_211 | not DE   | not DE   | not DE   | not DE  |
| EVM0014794 | LG12 | hypothetical protein JCGZ_224 | not DE   | not DE   | not DE   | not DE  |
| EVM0018025 | LG12 | hypothetical protein JCGZ_224 | not DE   | not DE   | not DE   | not DE  |
| EVM0005898 | LG12 | hypothetical protein JCGZ_224 | not DE   | not DE   | not DE   | not DE  |
| EVM0005356 | LG12 | hypothetical protein JCGZ_226 | not DE   | not DE   | not DE   | not DE  |
| EVM0011291 | LG12 | hypothetical protein JCGZ_227 | not DE   | not DE   | not DE   | not DE  |
| EVM0013877 | LG12 | hypothetical protein JCGZ_259 | not DE   | not DE   | not DE   | not DE  |
| EVM0022280 | LG12 | hypothetical protein JCGZ_260 | not DE   | not DE   | not DE   | not DE  |
| EVM0001239 | LG12 | hypothetical protein JCGZ_260 | not DE   | not DE   | not DE   | not DE  |
| EVM0001023 | LG12 | hypothetical protein JCGZ_261 | not DE   | not DE   | not DE   | not DE  |
| EVM0018203 | LG12 | hypothetical protein JCGZ_261 | not DE   | not DE   | not DE   | not DE  |
| EVM0009745 | LG12 | hypothetical protein JCGZ_261 | not DE   | not DE   | not DE   | not DE  |
| EVM0005272 | LG12 | hypothetical protein JCGZ_261 | not DE   | not DE   | not DE   | not DE  |
| EVM0004425 | LG12 | hypothetical protein JCGZ_261 | -1.42001 | 1.51E-06 | not DE   | not DE  |
| EVM0003222 | LG12 | hypothetical protein JCGZ_261 | not DE   | not DE   | not DE   | not DE  |
| EVM0023266 | LG12 | hypothetical protein JCGZ_261 | not DE   | not DE   | not DE   | not DE  |
| EVM0016005 | LG12 | hypothetical protein JCGZ_262 | not DE   | not DE   | not DE   | not DE  |
| EVM0011438 | LG12 | hypothetical protein JCGZ_262 | not DE   | not DE   | not DE   | not DE  |
| EVM0005565 | LG12 | hypothetical protein JCGZ_263 | not DE   | not DE   | not DE   | not DE  |
| EVM0000291 | LG12 | hypothetical protein JCGZ_263 | not DE   | not DE   | not DE   | not DE  |
| EVM0007405 | LG12 | hypothetical protein L484_011 | not DE   | not DE   | 1.72871  | 0.04    |
| EVM0016345 | LG12 | hypothetical protein L484_011 | not DE   | not DE   | not DE   | not DE  |
| EVM0009011 | LG12 | hypothetical protein L484_016 | not DE   | not DE   | not DE   | not DE  |
| EVM0009906 | LG12 | hypothetical protein L484_019 | not DE   | not DE   | not DE   | not DE  |
| EVM0009448 | LG12 | hypothetical protein L484_027 | not DE   | not DE   | not DE   | not DE  |
| EVM0014918 | LG12 | hypothetical protein M569_020 | not DE   | not DE   | not DE   | not DE  |
| EVM0024057 | LG12 | hypothetical protein M569_020 | not DE   | not DE   | not DE   | not DE  |
| EVM0002114 | LG12 | hypothetical protein MIMGU_mg | not DE   | not DE   | not DE   | not DE  |
| EVM0018876 | LG12 | hypothetical protein MIMGU_mg | not DE   | not DE   | not DE   | not DE  |
| EVM0009061 | LG12 | hypothetical protein MTR_3g06 | not DE   | not DE   | not DE   | not DE  |
| EVM0019689 | LG12 | hypothetical protein PHAVU_00 | not DE   | not DE   | not DE   | not DE  |
| EVM0023771 | LG12 | hypothetical protein PHAVU_00 | not DE   | not DE   | not DE   | not DE  |
| EVM0006751 | LG12 | hypothetical protein POPTR_00 | not DE   | not DE   | not DE   | not DE  |
| EVM0009515 | LG12 | hypothetical protein POPTR_00 | not DE   | not DE   | not DE   | not DE  |
| EVM0020931 | LG12 | hypothetical protein POPTR_00 | not DE   | not DE   | not DE   | not DE  |
| EVM0012227 | LG12 | hypothetical protein POPTR_00 | not DE   | not DE   | not DE   | not DE  |
| EVM0002775 | LG12 | hypothetical protein POPTR_00 | not DE   | not DE   | not DE   | not DE  |
| EVM0003827 | LG12 | hypothetical protein POPTR_00 | not DE   | not DE   | not DE   | not DE  |
| EVM0000924 | LG12 | hypothetical protein POPTR_00 | -1.00859 | 6.21E-05 | not DE   | not DE  |
| EVM0019529 | LG12 | hypothetical protein POPTR_00 | not DE   | not DE   | not DE   | not DE  |
| EVM0000825 | LG12 | hypothetical protein POPTR_00 | not DE   | not DE   | not DE   | not DE  |
| EVM0017290 | LG12 | hypothetical protein POPTR_00 | 1.187136 | 0.037613 | not DE   | not DE  |
| EVM0003765 | LG12 | hypothetical protein POPTR_00 | not DE   | not DE   | not DE   | not DE  |
| EVM0023080 | LG12 | hypothetical protein POPTR_00 | not DE   | not DE   | not DE   | not DE  |
| EVM0021940 | LG12 | hypothetical protein POPTR_00 | not DE   | not DE   | not DE   | not DE  |
| EVM0013081 | LG12 | hypothetical protein POPTR_00 | 2.952953 | 1.53E-05 | 1.669591 | 0.00023 |

|            |      |                               |          |          |        |        |
|------------|------|-------------------------------|----------|----------|--------|--------|
| EVM0009116 | LG12 | hypothetical protein POPTR_00 | not DE   | not DE   | not DE | not DE |
| EVM0018898 | LG12 | hypothetical protein POPTR_00 | not DE   | not DE   | not DE | not DE |
| EVM0002351 | LG12 | hypothetical protein POPTR_00 | not DE   | not DE   | not DE | not DE |
| EVM0013505 | LG12 | hypothetical protein POPTR_00 | not DE   | not DE   | not DE | not DE |
| EVM0021905 | LG12 | hypothetical protein POPTR_00 | not DE   | not DE   | not DE | not DE |
| EVM0023449 | LG12 | hypothetical protein POPTR_00 | not DE   | not DE   | not DE | not DE |
| EVM0000519 | LG12 | hypothetical protein POPTR_00 | not DE   | not DE   | not DE | not DE |
| EVM0001695 | LG12 | hypothetical protein POPTR_00 | not DE   | not DE   | not DE | not DE |
| EVM0004539 | LG12 | hypothetical protein POPTR_00 | not DE   | not DE   | not DE | not DE |
| EVM0011459 | LG12 | hypothetical protein POPTR_00 | not DE   | not DE   | not DE | not DE |
| EVM0019205 | LG12 | hypothetical protein POPTR_00 | not DE   | not DE   | not DE | not DE |
| EVM0019858 | LG12 | hypothetical protein POPTR_00 | not DE   | not DE   | not DE | not DE |
| EVM0024249 | LG12 | hypothetical protein POPTR_00 | not DE   | not DE   | not DE | not DE |
| EVM0020214 | LG12 | hypothetical protein POPTR_00 | not DE   | not DE   | not DE | not DE |
| EVM0005241 | LG12 | hypothetical protein POPTR_00 | not DE   | not DE   | not DE | not DE |
| EVM0006785 | LG12 | hypothetical protein POPTR_00 | not DE   | not DE   | not DE | not DE |
| EVM0020834 | LG12 | hypothetical protein PRUPE_pp | not DE   | not DE   | not DE | not DE |
| EVM0022445 | LG12 | hypothetical protein PRUPE_pp | not DE   | not DE   | not DE | not DE |
| EVM0021396 | LG12 | hypothetical protein PRUPE_pp | not DE   | not DE   | not DE | not DE |
| EVM0013647 | LG12 | hypothetical protein PRUPE_pp | not DE   | not DE   | not DE | not DE |
| EVM0005030 | LG12 | hypothetical protein PRUPE_pp | not DE   | not DE   | not DE | not DE |
| EVM0016357 | LG12 | hypothetical protein PRUPE_pp | not DE   | not DE   | not DE | not DE |
| EVM0018165 | LG12 | hypothetical protein PRUPE_pp | not DE   | not DE   | not DE | not DE |
| EVM0023026 | LG12 | hypothetical protein PRUPE_pp | not DE   | not DE   | not DE | not DE |
| EVM0023910 | LG12 | hypothetical protein PRUPE_pp | not DE   | not DE   | not DE | not DE |
| EVM0000151 | LG12 | hypothetical protein PRUPE_pp | not DE   | not DE   | not DE | not DE |
| EVM0022753 | LG12 | hypothetical protein VITISV_0 | not DE   | not DE   | not DE | not DE |
| EVM0014833 | LG12 | hypothetical protein VITISV_0 | not DE   | not DE   | not DE | not DE |
| EVM0022129 | LG12 | hypothetical protein VITISV_0 | not DE   | not DE   | not DE | not DE |
| EVM0004276 | LG12 | hypothetical protein VITISV_0 | not DE   | not DE   | not DE | not DE |
| EVM0020177 | LG12 | hypothetical protein VITISV_0 | not DE   | not DE   | not DE | not DE |
| EVM0021230 | LG12 | hypothetical protein VITISV_0 | not DE   | not DE   | not DE | not DE |
| EVM0014911 | LG12 | hypothetical protein VITISV_0 | not DE   | not DE   | not DE | not DE |
| EVM0010086 | LG12 | hypothetical protein VITISV_0 | not DE   | not DE   | not DE | not DE |
| EVM0015360 | LG12 | hypothetical protein VITISV_0 | not DE   | not DE   | not DE | not DE |
| EVM0000452 | LG12 | hypothetical protein VITISV_0 | not DE   | not DE   | not DE | not DE |
| EVM0023334 | LG12 | hypothetical protein VITISV_0 | not DE   | not DE   | not DE | not DE |
| EVM0008819 | LG12 | hypothetical protein VITISV_0 | not DE   | not DE   | not DE | not DE |
| EVM0023276 | LG12 | hypothetical protein VITISV_0 | not DE   | not DE   | not DE | not DE |
| EVM0004422 | LG12 | integrase                     | not DE   | not DE   | not DE | not DE |
| EVM0018610 | LG12 | leucoanthocyanidin dioxygenas | not DE   | not DE   | not DE | not DE |
| EVM0015475 | LG12 | lipid transfer protein        | -1.57497 | 0.029483 | not DE | not DE |
| EVM0001203 | LG12 | mak, putative                 | not DE   | not DE   | not DE | not DE |
| EVM0022016 | LG12 | metal ion binding protein, pu | not DE   | not DE   | not DE | not DE |
| EVM0005701 | LG12 | nitrate transporter, putative | not DE   | not DE   | not DE | not DE |
| EVM0017157 | LG12 | no apical meristem family pro | not DE   | not DE   | not DE | not DE |
| EVM0007281 | LG12 | organic cation transporter-re | not DE   | not DE   | not DE | not DE |
| EVM0022556 | LG12 | phytoene synthase 2           | not DE   | not DE   | not DE | not DE |
| EVM0012221 | LG12 | polygalacturonase             | not DE   | not DE   | not DE | not DE |
| EVM0023540 | LG12 | prohibitin, putative          | not DE   | not DE   | not DE | not DE |
| EVM0022147 | LG12 | protein kinase                | not DE   | not DE   | not DE | not DE |
| EVM0023593 | LG12 | protein kinase                | not DE   | not DE   | not DE | not DE |
| EVM0012772 | LG12 | putative esterase family prot | not DE   | not DE   | not DE | not DE |
| EVM0003829 | LG12 | remorin                       | 1.0508   | 0.027073 | not DE | not DE |

|            |      |                               |          |          |          |         |
|------------|------|-------------------------------|----------|----------|----------|---------|
| EVM0005306 | LG12 | retrotransposon protein, puta | not DE   | not DE   | not DE   | not DE  |
| EVM0011592 | LG12 | short-chain dehydrogenase, pu | not DE   | not DE   | not DE   | not DE  |
| EVM0012717 | LG12 | short-chain dehydrogenase, pu | not DE   | not DE   | not DE   | not DE  |
| EVM0012535 | LG12 | short-chain dehydrogenase/red | not DE   | not DE   | not DE   | not DE  |
| EVM0021499 | LG12 | short-chain dehydrogenase/red | not DE   | not DE   | not DE   | not DE  |
| EVM0014291 | LG12 | soluble acid invertase        | 1.006569 | 0.0231   | not DE   | not DE  |
| EVM0003572 | LG12 | thaumatin-like protein        | not DE   | not DE   | not DE   | not DE  |
| EVM0009368 | LG12 | thaumatin-like protein        | not DE   | not DE   | not DE   | not DE  |
| EVM0010737 | LG12 | thaumatin-like protein        | not DE   | not DE   | not DE   | not DE  |
| EVM0011240 | LG12 | tonoplast intrinsic protein,  | not DE   | not DE   | not DE   | not DE  |
| EVM0018157 | LG12 | tonoplast intrinsic protein,  | not DE   | not DE   | not DE   | not DE  |
| EVM0000778 | LG12 | uncharacterized protein LOC10 | not DE   | not DE   | not DE   | not DE  |
| EVM0021961 | LG12 | uncharacterized protein LOC10 | not DE   | not DE   | not DE   | not DE  |
| EVM0022315 | LG12 | uncharacterized protein LOC10 | not DE   | not DE   | not DE   | not DE  |
| EVM0002206 | LG12 | unknown protein               | not DE   | not DE   | 1.071226 | #####   |
| EVM0003591 | LG12 | unknown protein               | not DE   | not DE   | not DE   | not DE  |
| EVM0007744 | LG12 | unknown protein               | not DE   | not DE   | 1.913298 | 0.02397 |
| EVM0011517 | LG12 | unknown protein               | not DE   | not DE   | not DE   | not DE  |
| EVM0012366 | LG12 | unknown protein               | not DE   | not DE   | not DE   | not DE  |
| EVM0013855 | LG12 | unknown protein               | not DE   | not DE   | not DE   | not DE  |
| EVM0018618 | LG12 | unknown protein               | not DE   | not DE   | not DE   | not DE  |
| EVM0020071 | LG12 | unknown protein               | not DE   | not DE   | not DE   | not DE  |
| EVM0020592 | LG12 | unknown protein               | not DE   | not DE   | not DE   | not DE  |
| EVM0021012 | LG12 | unknown protein               | not DE   | not DE   | not DE   | not DE  |
| EVM0021185 | LG12 | unknown protein               | not DE   | not DE   | not DE   | not DE  |
| EVM0021766 | LG12 | unknown protein               | -4.64652 | 0.00325  | not DE   | not DE  |
| EVM0021855 | LG12 | unknown protein               | not DE   | not DE   | not DE   | not DE  |
| EVM0021945 | LG12 | unknown protein               | not DE   | not DE   | not DE   | not DE  |
| EVM0022876 | LG12 | unknown protein               | not DE   | not DE   | not DE   | not DE  |
| EVM0023229 | LG12 | unknown protein               | not DE   | not DE   | not DE   | not DE  |
| EVM0023848 | LG12 | unknown protein               | not DE   | not DE   | not DE   | not DE  |
| EVM0024112 | LG12 | unknown protein               | not DE   | not DE   | not DE   | not DE  |
| EVM0000662 | LG12 | unnamed protein product       | not DE   | not DE   | not DE   | not DE  |
| EVM0001458 | LG12 | unnamed protein product       | not DE   | not DE   | not DE   | not DE  |
| EVM0001895 | LG12 | unnamed protein product       | not DE   | not DE   | not DE   | not DE  |
| EVM0002063 | LG12 | unnamed protein product       | not DE   | not DE   | not DE   | not DE  |
| EVM0003137 | LG12 | unnamed protein product       | not DE   | not DE   | not DE   | not DE  |
| EVM0004662 | LG12 | unnamed protein product       | not DE   | not DE   | not DE   | not DE  |
| EVM0007166 | LG12 | unnamed protein product       | not DE   | not DE   | not DE   | not DE  |
| EVM0007756 | LG12 | unnamed protein product       | -1.65277 | 0.007283 | not DE   | not DE  |
| EVM0009369 | LG12 | unnamed protein product       | not DE   | not DE   | not DE   | not DE  |
| EVM0009714 | LG12 | unnamed protein product       | -3.21449 | 1.14E-09 | -1.75777 | #####   |
| EVM0010508 | LG12 | unnamed protein product       | not DE   | not DE   | not DE   | not DE  |
| EVM0011272 | LG12 | unnamed protein product       | not DE   | not DE   | not DE   | not DE  |
| EVM0012312 | LG12 | unnamed protein product       | not DE   | not DE   | not DE   | not DE  |
| EVM0012318 | LG12 | unnamed protein product       | not DE   | not DE   | not DE   | not DE  |
| EVM0014621 | LG12 | unnamed protein product       | not DE   | not DE   | not DE   | not DE  |
| EVM0015939 | LG12 | unnamed protein product       | not DE   | not DE   | not DE   | not DE  |
| EVM0019248 | LG12 | unnamed protein product       | not DE   | not DE   | not DE   | not DE  |
| EVM0019287 | LG12 | unnamed protein product       | not DE   | not DE   | not DE   | not DE  |
| EVM0020847 | LG12 | unnamed protein product       | not DE   | not DE   | not DE   | not DE  |
| EVM0020893 | LG12 | unnamed protein product       | not DE   | not DE   | not DE   | not DE  |
| EVM0022532 | LG12 | unnamed protein product       | 3.474864 | 0.001612 | not DE   | not DE  |
| EVM0022644 | LG12 | unnamed protein product       | not DE   | not DE   | not DE   | not DE  |

|            |      |                                                              |          |          |          |         |
|------------|------|--------------------------------------------------------------|----------|----------|----------|---------|
| EVM0022481 | LG13 | 1-(5-phosphoribosyl)-5-[(5-phosphoribosyl)-5-phosphoribosyl] | not DE   | not DE   | not DE   | not DE  |
| EVM0010733 | LG13 | 1-aminocyclopropane-1-carboxylic acid                        | not DE   | not DE   | not DE   | not DE  |
| EVM0014606 | LG13 | 125 kDa kinesin-related protein                              | not DE   | not DE   | not DE   | not DE  |
| EVM0022646 | LG13 | 17.7 kDa class I heat shock protein                          | -3.37971 | 7.17E-15 | not DE   | not DE  |
| EVM0002770 | LG13 | 2,3-bisphosphoglycerate-independent phosphoglycerate kinase  | not DE   | not DE   | not DE   | not DE  |
| EVM0010583 | LG13 | 36.4 kDa proline-rich protein                                | not DE   | not DE   | not DE   | not DE  |
| EVM0012253 | LG13 | 36.4 kDa proline-rich protein                                | not DE   | not DE   | not DE   | not DE  |
| EVM0001499 | LG13 | 40S ribosomal protein S15a-1                                 | not DE   | not DE   | not DE   | not DE  |
| EVM0003646 | LG13 | 40S ribosomal protein S9-2                                   | not DE   | not DE   | not DE   | not DE  |
| EVM0014642 | LG13 | 40S ribosomal protein S9-2                                   | not DE   | not DE   | not DE   | not DE  |
| EVM0002923 | LG13 | 60S acidic ribosomal protein L16                             | not DE   | not DE   | not DE   | not DE  |
| EVM0009899 | LG13 | 60S acidic ribosomal protein L16                             | not DE   | not DE   | not DE   | not DE  |
| EVM0007598 | LG13 | 60S ribosomal protein L10a-2                                 | not DE   | not DE   | not DE   | not DE  |
| EVM0009876 | LG13 | 60S ribosomal protein L10a-2                                 | not DE   | not DE   | not DE   | not DE  |
| EVM0007351 | LG13 | 60S ribosomal protein L12                                    | not DE   | not DE   | not DE   | not DE  |
| EVM0015649 | LG13 | 60S ribosomal protein L21-2                                  | not DE   | not DE   | not DE   | not DE  |
| EVM0000086 | LG13 | 60S ribosomal protein L27-like                               | not DE   | not DE   | not DE   | not DE  |
| EVM0021605 | LG13 | 60S ribosomal protein L27-like                               | not DE   | not DE   | not DE   | not DE  |
| EVM0014116 | LG13 | 60S ribosomal protein L4-like                                | not DE   | not DE   | not DE   | not DE  |
| EVM0020551 | LG13 | 60S ribosomal protein L4-like                                | not DE   | not DE   | not DE   | not DE  |
| EVM0020367 | LG13 | ABC transporter B family member                              | not DE   | not DE   | not DE   | not DE  |
| EVM0018922 | LG13 | ABC transporter B family member                              | not DE   | not DE   | not DE   | not DE  |
| EVM0019328 | LG13 | ABC transporter G family member                              | not DE   | not DE   | not DE   | not DE  |
| EVM0017057 | LG13 | ABC transporter G family member                              | not DE   | not DE   | not DE   | not DE  |
| EVM0019212 | LG13 | AMP deaminase-like                                           | not DE   | not DE   | not DE   | not DE  |
| EVM0000514 | LG13 | AP-4 complex subunit epsilon                                 | not DE   | not DE   | not DE   | not DE  |
| EVM0007314 | LG13 | AP2-like ethylene-responsive transcription factor            | not DE   | not DE   | not DE   | not DE  |
| EVM0009949 | LG13 | AT-rich interactive domain-containing protein                | not DE   | not DE   | not DE   | not DE  |
| EVM0022065 | LG13 | ATP-dependent zinc metalloprotease                           | not DE   | not DE   | not DE   | not DE  |
| EVM0023479 | LG13 | ATP-dependent zinc metalloprotease                           | not DE   | not DE   | not DE   | not DE  |
| EVM0008648 | LG13 | ATP-dependent zinc metalloprotease                           | not DE   | not DE   | not DE   | not DE  |
| EVM0000307 | LG13 | ATP-dependent zinc metalloprotease                           | not DE   | not DE   | -2.03947 | 0.00077 |
| EVM0004673 | LG13 | ATP-dependent zinc metalloprotease                           | 4.196536 | 4.48E-08 | not DE   | not DE  |
| EVM0005155 | LG13 | BEL1-like homeodomain protein                                | not DE   | not DE   | not DE   | not DE  |
| EVM0010686 | LG13 | BEL1-like homeodomain protein                                | not DE   | not DE   | not DE   | not DE  |
| EVM0020033 | LG13 | BEL1-like homeodomain protein                                | not DE   | not DE   | not DE   | not DE  |
| EVM0012702 | LG13 | BRCT domain-containing protein                               | not DE   | not DE   | not DE   | not DE  |
| EVM0020535 | LG13 | BRCT domain-containing protein                               | not DE   | not DE   | not DE   | not DE  |
| EVM0019545 | LG13 | BTB/POZ domain-containing protein                            | not DE   | not DE   | not DE   | not DE  |
| EVM0010040 | LG13 | BTB/POZ domain-containing protein                            | not DE   | not DE   | not DE   | not DE  |
| EVM0016071 | LG13 | CBL-interacting serine/threonine kinase                      | not DE   | not DE   | not DE   | not DE  |
| EVM0016846 | LG13 | COBRA-like protein 4                                         | not DE   | not DE   | not DE   | not DE  |
| EVM0016404 | LG13 | CYSTM1 family protein A-like                                 | not DE   | not DE   | not DE   | not DE  |
| EVM0001718 | LG13 | D-lactate dehydrogenase                                      | not DE   | not DE   | not DE   | not DE  |
| EVM0007879 | LG13 | D-lactate dehydrogenase                                      | not DE   | not DE   | not DE   | not DE  |
| EVM0015636 | LG13 | D-lactate dehydrogenase                                      | 1.6704   | 0.002418 | not DE   | not DE  |
| EVM0010989 | LG13 | DEAD-box ATP-dependent RNA helicase                          | not DE   | not DE   | not DE   | not DE  |
| EVM0001887 | LG13 | DNA helicase MCM8-like                                       | not DE   | not DE   | not DE   | not DE  |
| EVM0017068 | LG13 | DNA polymerase delta small subunit                           | not DE   | not DE   | not DE   | not DE  |
| EVM0007545 | LG13 | DNA-3-methyladenine glycosylase                              | not DE   | not DE   | not DE   | not DE  |
| EVM0006118 | LG13 | E3 ubiquitin-protein ligase                                  | not DE   | not DE   | not DE   | not DE  |
| EVM0006740 | LG13 | E3 ubiquitin-protein ligase                                  | not DE   | not DE   | not DE   | not DE  |
| EVM0002149 | LG13 | E3 ubiquitin-protein ligase                                  | not DE   | not DE   | 4.009717 | 0.00356 |
| EVM0014595 | LG13 | E3 ubiquitin-protein ligase                                  | not DE   | not DE   | not DE   | not DE  |



|            |      |                               |          |          |          |         |
|------------|------|-------------------------------|----------|----------|----------|---------|
| EVM0019940 | LG13 | E3 ubiquitin-protein ligase   | not DE   | not DE   | not DE   | not DE  |
| EVM0001399 | LG13 | E3 ubiquitin-protein ligase   | not DE   | not DE   | not DE   | not DE  |
| EVM0018613 | LG13 | E3 ubiquitin-protein ligase   | not DE   | not DE   | not DE   | not DE  |
| EVM0018295 | LG13 | E3 ubiquitin-protein ligase   | not DE   | not DE   | not DE   | not DE  |
| EVM0011634 | LG13 | F-box protein At3g58530-like  | not DE   | not DE   | not DE   | not DE  |
| EVM0015701 | LG13 | F-box protein At5g39250       | not DE   | not DE   | not DE   | not DE  |
| EVM0000685 | LG13 | F-box/LRR-repeat protein 3    | not DE   | not DE   | not DE   | not DE  |
| EVM0004556 | LG13 | F-box/WD repeat-containing p  | not DE   | not DE   | not DE   | not DE  |
| EVM0013949 | LG13 | F-box/kelch-repeat protein A  | not DE   | not DE   | not DE   | not DE  |
| EVM0014955 | LG13 | Fanconi anemia group D2 prot  | not DE   | not DE   | not DE   | not DE  |
| EVM0013454 | LG13 | G patch domain-containing pr  | not DE   | not DE   | not DE   | not DE  |
| EVM0022223 | LG13 | G patch domain-containing pr  | not DE   | not DE   | not DE   | not DE  |
| EVM0015529 | LG13 | GDSL esterase/lipase 7-like   | not DE   | not DE   | not DE   | not DE  |
| EVM0023370 | LG13 | GDSL esterase/lipase At5g036  | not DE   | not DE   | not DE   | not DE  |
| EVM0013201 | LG13 | GDSL esterase/lipase CPRD49   | not DE   | not DE   | not DE   | not DE  |
| EVM0007160 | LG13 | HEAT repeat-containing prote  | not DE   | not DE   | -1.41408 | #####   |
| EVM0019220 | LG13 | IAA-amino acid hydrolase ILR  | not DE   | not DE   | not DE   | not DE  |
| EVM0023738 | LG13 | L-ascorbate oxidase-like      | not DE   | not DE   | not DE   | not DE  |
| EVM0024307 | LG13 | L-type lectin-domain contain  | not DE   | not DE   | -1.56008 | 0.04088 |
| EVM0023893 | LG13 | L-type lectin-domain contain  | not DE   | not DE   | not DE   | not DE  |
| EVM0022931 | LG13 | L-type lectin-domain contain  | not DE   | not DE   | not DE   | not DE  |
| EVM0004296 | LG13 | LOB domain-containing protei  | not DE   | not DE   | not DE   | not DE  |
| EVM0019099 | LG13 | LOW QUALITY PROTEIN: CTD nuc  | not DE   | not DE   | not DE   | not DE  |
| EVM0017313 | LG13 | LOW QUALITY PROTEIN: putativ  | not DE   | not DE   | not DE   | not DE  |
| EVM0003418 | LG13 | LOW QUALITY PROTEIN: regulat  | not DE   | not DE   | not DE   | not DE  |
| EVM0001830 | LG13 | LRR receptor-like serine/thr  | -1.51478 | 0.002796 | -2.49655 | 0.00605 |
| EVM0017238 | LG13 | LRR receptor-like serine/thr  | not DE   | not DE   | not DE   | not DE  |
| EVM0002273 | LG13 | NADH dehydrogenase            | 2.334377 | 0.002762 | not DE   | not DE  |
| EVM0023568 | LG13 | NADH dehydrogenase            | 1.521636 | 0.04196  | not DE   | not DE  |
| EVM0024642 | LG13 | PAN domain-containing protei  | 1.719413 | 0.000238 | not DE   | not DE  |
| EVM0003643 | LG13 | RING finger and transmembran  | not DE   | not DE   | not DE   | not DE  |
| EVM0001004 | LG13 | RING-H2 finger protein ATL33  | not DE   | not DE   | not DE   | not DE  |
| EVM0019103 | LG13 | RING-H2 finger protein ATL70  | not DE   | not DE   | not DE   | not DE  |
| EVM0000667 | LG13 | RNA polymerase sigma factor   | not DE   | not DE   | not DE   | not DE  |
| EVM0016297 | LG13 | RNA-binding protein Musashi   | not DE   | not DE   | not DE   | not DE  |
| EVM0015296 | LG13 | SNF1-related protein kinase   | not DE   | not DE   | not DE   | not DE  |
| EVM0023581 | LG13 | SNF1-related protein kinase   | not DE   | not DE   | not DE   | not DE  |
| EVM0004282 | LG13 | SPX domain-containing protei  | not DE   | not DE   | not DE   | not DE  |
| EVM0018114 | LG13 | TMV resistance protein N-like | not DE   | not DE   | not DE   | not DE  |
| EVM0010466 | LG13 | TSL-kinase interacting prote  | not DE   | not DE   | not DE   | not DE  |
| EVM0010806 | LG13 | U-box domain-containing prot  | not DE   | not DE   | not DE   | not DE  |
| EVM0013848 | LG13 | UDP-galactose transporter 2-  | not DE   | not DE   | not DE   | not DE  |
| EVM0018903 | LG13 | UDP-glucose flavonoid 3-O-gl  | 3.615783 | 0.00176  | not DE   | not DE  |
| EVM0008879 | LG13 | UDP-glycosyltransferase 73C1  | not DE   | not DE   | not DE   | not DE  |
| EVM0018939 | LG13 | UDP-glycosyltransferase 73C1  | not DE   | not DE   | not DE   | not DE  |
| EVM0005640 | LG13 | UDP-glycosyltransferase 73C3  | not DE   | not DE   | not DE   | not DE  |
| EVM0006641 | LG13 | UDP-glycosyltransferase 73C3  | not DE   | not DE   | not DE   | not DE  |
| EVM0010055 | LG13 | UDP-glycosyltransferase 73C3  | not DE   | not DE   | not DE   | not DE  |
| EVM0017168 | LG13 | UDP-glycosyltransferase 73C3  | not DE   | not DE   | not DE   | not DE  |
| EVM0005964 | LG13 | UDP-glycosyltransferase 83A1  | not DE   | not DE   | not DE   | not DE  |
| EVM0010437 | LG13 | UDP-glycosyltransferase 83A1  | not DE   | not DE   | not DE   | not DE  |
| EVM0016768 | LG13 | UDP-glycosyltransferase 83A1  | not DE   | not DE   | not DE   | not DE  |
| EVM0007426 | LG13 | UDP-glycosyltransferase 83A1  | not DE   | not DE   | not DE   | not DE  |
| EVM0003467 | LG13 | UPF0420 protein C16orf58 hom  | not DE   | not DE   | not DE   | not DE  |

|            |      |                               |          |          |          |         |
|------------|------|-------------------------------|----------|----------|----------|---------|
| EVM0015920 | LG13 | UPF0554 protein C2orf43 homol | -1.85368 | 0.027737 | not DE   | not DE  |
| EVM0013051 | LG13 | V-type proton ATPase subunit  | not DE   | not DE   | not DE   | not DE  |
| EVM0024476 | LG13 | WAT1-related protein At2g374  | not DE   | not DE   | not DE   | not DE  |
| EVM0003019 | LG13 | WAT1-related protein At4g191  | not DE   | not DE   | not DE   | not DE  |
| EVM0003881 | LG13 | WEB family protein At2g3837C  | not DE   | not DE   | not DE   | not DE  |
| EVM0010166 | LG13 | WPP domain-interacting tail-  | not DE   | not DE   | not DE   | not DE  |
| EVM0022939 | LG13 | WRKY transcription factor 44  | not DE   | not DE   | not DE   | not DE  |
| EVM0005191 | LG13 | acetyl-coenzyme A carboxylas  | not DE   | not DE   | not DE   | not DE  |
| EVM0011237 | LG13 | actin-like                    | not DE   | not DE   | not DE   | not DE  |
| EVM0007618 | LG13 | adenosine kinase 2 isoform X  | not DE   | not DE   | not DE   | not DE  |
| EVM0001556 | LG13 | agamous-like MADS-box protei  | not DE   | not DE   | not DE   | not DE  |
| EVM0018904 | LG13 | agamous-like MADS-box protei  | not DE   | not DE   | not DE   | not DE  |
| EVM0023513 | LG13 | aldo-keto reductase family 4  | not DE   | not DE   | not DE   | not DE  |
| EVM0013841 | LG13 | aldo-keto reductase family 4  | not DE   | not DE   | not DE   | not DE  |
| EVM0010159 | LG13 | aldose 1-epimerase-like       | not DE   | not DE   | not DE   | not DE  |
| EVM0011802 | LG13 | alpha-1,4 glucan phosphoryla  | not DE   | not DE   | not DE   | not DE  |
| EVM0017893 | LG13 | anaphase-promoting complex s  | not DE   | not DE   | not DE   | not DE  |
| EVM0009155 | LG13 | ankyrin repeat-containing pr  | not DE   | not DE   | not DE   | not DE  |
| EVM0007643 | LG13 | anthocyanidin 3-O-glucosyltr  | not DE   | not DE   | not DE   | not DE  |
| EVM0021539 | LG13 | aquaporin NIP2-1-like         | not DE   | not DE   | not DE   | not DE  |
| EVM0015288 | LG13 | aspartic proteinase PCS1      | not DE   | not DE   | not DE   | not DE  |
| EVM0011486 | LG13 | auxin transport protein BIG-  | not DE   | not DE   | -1.11752 | #####   |
| EVM0019483 | LG13 | axoneme-associated protein m  | not DE   | not DE   | not DE   | not DE  |
| EVM0004408 | LG13 | beta-fructofuranosidase, ins  | not DE   | not DE   | not DE   | not DE  |
| EVM0004395 | LG13 | bifunctional enolase 2/trans  | not DE   | not DE   | not DE   | not DE  |
| EVM0011618 | LG13 | biogenesis of lysosome-relat  | not DE   | not DE   | not DE   | not DE  |
| EVM0016787 | LG13 | bromodomain and WD repeat-co  | not DE   | not DE   | not DE   | not DE  |
| EVM0008156 | LG13 | calcium-dependent protein ki  | not DE   | not DE   | not DE   | not DE  |
| EVM0005794 | LG13 | calcium-transporting ATPase   | not DE   | not DE   | not DE   | not DE  |
| EVM0020314 | LG13 | calmodulin-7 isoform X1       | not DE   | not DE   | not DE   | not DE  |
| EVM0022782 | LG13 | casparian strip membrane pro  | not DE   | not DE   | not DE   | not DE  |
| EVM0008571 | LG13 | casparian strip membrane pro  | not DE   | not DE   | not DE   | not DE  |
| EVM0012509 | LG13 | cation/H(+) antiporter 20-li  | not DE   | not DE   | not DE   | not DE  |
| EVM0022979 | LG13 | cation/H(+) antiporter 26-li  | not DE   | not DE   | not DE   | not DE  |
| EVM0014954 | LG13 | cell division control protei  | not DE   | not DE   | not DE   | not DE  |
| EVM0017658 | LG13 | cell division cycle 20.1, co  | not DE   | not DE   | not DE   | not DE  |
| EVM0001889 | LG13 | cell division protein FtsZ h  | -1.62597 | 0.001865 | not DE   | not DE  |
| EVM0016488 | LG13 | cell division protein FtsZ h  | not DE   | not DE   | not DE   | not DE  |
| EVM0016185 | LG13 | cell wall protein AWA1-like   | not DE   | not DE   | not DE   | not DE  |
| EVM0009129 | LG13 | cell wall protein AWA1-like   | not DE   | not DE   | not DE   | not DE  |
| EVM0007733 | LG13 | cellulose synthase-like prot  | not DE   | not DE   | not DE   | not DE  |
| EVM0016194 | LG13 | choline-phosphate cytidylt    | not DE   | not DE   | not DE   | not DE  |
| EVM0012789 | LG13 | clathrin light chain 3-like   | not DE   | not DE   | not DE   | not DE  |
| EVM0001482 | LG13 | cystathionine gamma-synthase  | not DE   | not DE   | not DE   | not DE  |
| EVM0019625 | LG13 | cytochrome P450 94A1-like is  | not DE   | not DE   | not DE   | not DE  |
| EVM0021635 | LG13 | cytochrome P450 97B2, chloro  | not DE   | not DE   | not DE   | not DE  |
| EVM0016515 | LG13 | dedicator of cytokinesis pro  | not DE   | not DE   | not DE   | not DE  |
| EVM0024593 | LG13 | dehydration-responsive elemen | not DE   | not DE   | not DE   | not DE  |
| EVM0022688 | LG13 | diaminopimelate epimerase, c  | not DE   | not DE   | not DE   | not DE  |
| EVM0024546 | LG13 | digalactosyldiacylglycerol s  | not DE   | not DE   | not DE   | not DE  |
| EVM0014232 | LG13 | dihydrofolate reductase-like  | not DE   | not DE   | 1.141803 | 0.03456 |
| EVM0013907 | LG13 | dirigent protein 17-like isc  | not DE   | not DE   | not DE   | not DE  |
| EVM0000076 | LG13 | dirigent protein 22           | not DE   | not DE   | not DE   | not DE  |
| EVM0010163 | LG13 | dirigent protein 23-like      | not DE   | not DE   | 1.278377 | 0.01972 |

|            |      |                              |          |          |          |         |
|------------|------|------------------------------|----------|----------|----------|---------|
| EVM0020865 | LG13 | disease resistance protein A | not DE   | not DE   | not DE   | not DE  |
| EVM0022469 | LG13 | dnaJ homolog subfamily C mem | not DE   | not DE   | not DE   | not DE  |
| EVM0005420 | LG13 | dnaJ homolog subfamily C mem | -1.71092 | 0.022602 | -2.27577 | 0.00073 |
| EVM0019334 | LG13 | ecotropic viral integration  | not DE   | not DE   | not DE   | not DE  |
| EVM0004104 | LG13 | elongation factor 1-alpha is | not DE   | not DE   | not DE   | not DE  |
| EVM0021814 | LG13 | enolase-like                 | not DE   | not DE   | not DE   | not DE  |
| EVM0001474 | LG13 | enoyl-[acyl-carrier-protein] | not DE   | not DE   | not DE   | not DE  |
| EVM0021375 | LG13 | ethylene-insensitive protein | not DE   | not DE   | -1.37438 | #####   |
| EVM0017076 | LG13 | ethylene-responsive transcri | not DE   | not DE   | not DE   | not DE  |
| EVM0002090 | LG13 | eukaryotic translation initi | not DE   | not DE   | not DE   | not DE  |
| EVM0024629 | LG13 | eukaryotic translation initi | not DE   | not DE   | not DE   | not DE  |
| EVM0007019 | LG13 | eukaryotic translation initi | not DE   | not DE   | not DE   | not DE  |
| EVM0019266 | LG13 | eukaryotic translation initi | -1.42758 | 3.65E-10 | not DE   | not DE  |
| EVM0008907 | LG13 | fasciclin-like arabinogalact | not DE   | not DE   | not DE   | not DE  |
| EVM0023638 | LG13 | fatty acyl-CoA reductase 2-l | not DE   | not DE   | not DE   | not DE  |
| EVM0013177 | LG13 | fructose-1,6-bisphosphatase, | not DE   | not DE   | not DE   | not DE  |
| EVM0020789 | LG13 | galactose oxidase-like       | -1.75161 | 0.034325 | not DE   | not DE  |
| EVM0010189 | LG13 | gamma aminobutyrate transami | not DE   | not DE   | not DE   | not DE  |
| EVM0009246 | LG13 | gamma-interferon-inducible l | not DE   | not DE   | not DE   | not DE  |
| EVM0015303 | LG13 | gamma-interferon-inducible l | not DE   | not DE   | not DE   | not DE  |
| EVM0024299 | LG13 | gamma-tubulin complex compon | not DE   | not DE   | not DE   | not DE  |
| EVM0002378 | LG13 | gibberellin 2-beta-dioxygena | not DE   | not DE   | not DE   | not DE  |
| EVM0023915 | LG13 | glucose-induced degradation  | not DE   | not DE   | not DE   | not DE  |
| EVM0010627 | LG13 | glutathione S-transferase L3 | not DE   | not DE   | not DE   | not DE  |
| EVM0001533 | LG13 | glycine-rich RNA-binding pro | not DE   | not DE   | not DE   | not DE  |
| EVM0020388 | LG13 | glycine-rich RNA-binding pro | not DE   | not DE   | not DE   | not DE  |
| EVM0010578 | LG13 | growth-regulating factor 3-l | not DE   | not DE   | not DE   | not DE  |
| EVM0010871 | LG13 | heat stress transcription fa | not DE   | not DE   | not DE   | not DE  |
| EVM0022897 | LG13 | heme-binding-like protein At | not DE   | not DE   | not DE   | not DE  |
| EVM0020979 | LG13 | heterogeneous nuclear ribonu | not DE   | not DE   | not DE   | not DE  |
| EVM0024488 | LG13 | high-light-induced protein,  | not DE   | not DE   | not DE   | not DE  |
| EVM0007323 | LG13 | histidine--tRNA ligase, cyto | not DE   | not DE   | not DE   | not DE  |
| EVM0018458 | LG13 | histone deacetylase HDT1-lik | not DE   | not DE   | not DE   | not DE  |
| EVM0019560 | LG13 | homeobox-leucine zipper prot | not DE   | not DE   | not DE   | not DE  |
| EVM0000577 | LG13 | hsp70-binding protein 1-like | not DE   | not DE   | not DE   | not DE  |
| EVM0003400 | LG13 | inositol hexakisphosphate an | not DE   | not DE   | -1.26168 | 0.01612 |
| EVM0019052 | LG13 | inositol hexakisphosphate an | not DE   | not DE   | not DE   | not DE  |
| EVM0007720 | LG13 | isoprenylcysteine alpha-carb | not DE   | not DE   | not DE   | not DE  |
| EVM0011733 | LG13 | isoprenylcysteine alpha-carb | not DE   | not DE   | not DE   | not DE  |
| EVM0023488 | LG13 | kanadaplin-like              | not DE   | not DE   | not DE   | not DE  |
| EVM0009611 | LG13 | kinesin-related protein 4-li | not DE   | not DE   | not DE   | not DE  |
| EVM0020562 | LG13 | lamin-like protein-like      | not DE   | not DE   | not DE   | not DE  |
| EVM0021316 | LG13 | leucine-rich repeat receptor | 2.185343 | 0.006798 | not DE   | not DE  |
| EVM0007882 | LG13 | leucine-rich repeat receptor | not DE   | not DE   | not DE   | not DE  |
| EVM0003231 | LG13 | lipid phosphate phosphatase  | not DE   | not DE   | not DE   | not DE  |
| EVM0009459 | LG13 | long-chain-alcohol oxidase F | not DE   | not DE   | not DE   | not DE  |
| EVM0017520 | LG13 | lysosomal Pro-X carboxypepti | not DE   | not DE   | not DE   | not DE  |
| EVM0007455 | LG13 | mRNA-decapping enzyme-like p | not DE   | not DE   | not DE   | not DE  |
| EVM0007129 | LG13 | maestro heat-like repeat-con | not DE   | not DE   | not DE   | not DE  |
| EVM0020594 | LG13 | maestro heat-like repeat-con | not DE   | not DE   | not DE   | not DE  |
| EVM0015577 | LG13 | mediator of RNA polymerase I | not DE   | not DE   | not DE   | not DE  |
| EVM0000606 | LG13 | mental retardation GTPase ac | not DE   | not DE   | not DE   | not DE  |
| EVM0017656 | LG13 | metal tolerance protein C2-l | not DE   | not DE   | not DE   | not DE  |
| EVM0002642 | LG13 | metalloendoprotease 1-like   | not DE   | not DE   | not DE   | not DE  |

|            |      |                               |          |          |          |         |
|------------|------|-------------------------------|----------|----------|----------|---------|
| EVM0017332 | LG13 | metalloendoprotease 1-like    | not DE   | not DE   | not DE   | not DE  |
| EVM0010954 | LG13 | mitochondrial fission protein | not DE   | not DE   | not DE   | not DE  |
| EVM0014268 | LG13 | mitochondrial import inner m  | not DE   | not DE   | not DE   | not DE  |
| EVM0011669 | LG13 | mitoferrin-like               | not DE   | not DE   | not DE   | not DE  |
| EVM0023873 | LG13 | mitogen-activated protein kin | not DE   | not DE   | not DE   | not DE  |
| EVM0008955 | LG13 | multidrug and toxin extrusio  | not DE   | not DE   | not DE   | not DE  |
| EVM0011049 | LG13 | myb family transcription fac  | not DE   | not DE   | not DE   | not DE  |
| EVM0022504 | LG13 | myb-related protein Myb4-like | not DE   | not DE   | not DE   | not DE  |
| EVM0013702 | LG13 | myosin-2-like isoform X1      | not DE   | not DE   | not DE   | not DE  |
| EVM0021005 | LG13 | myosin-2-like isoform X1      | not DE   | not DE   | not DE   | not DE  |
| EVM0011223 | LG13 | myosin-9-like                 | not DE   | not DE   | not DE   | not DE  |
| EVM0003941 | LG13 | neurofilament heavy polypept  | not DE   | not DE   | not DE   | not DE  |
| EVM0021314 | LG13 | ninja-family protein AFP3-li  | 1.765043 | 0.013279 | not DE   | not DE  |
| EVM0020116 | LG13 | nipped-B-like protein-like i  | not DE   | not DE   | not DE   | not DE  |
| EVM0003468 | LG13 | nodulation-signaling pathway  | not DE   | not DE   | not DE   | not DE  |
| EVM0002959 | LG13 | non-specific lipid-transfer   | not DE   | not DE   | not DE   | not DE  |
| EVM0016905 | LG13 | non-structural maintenance c  | not DE   | not DE   | not DE   | not DE  |
| EVM0011548 | LG13 | nuclear transcription factor  | not DE   | not DE   | not DE   | not DE  |
| EVM0019538 | LG13 | nudix hydrolase 23, chloropl  | not DE   | not DE   | not DE   | not DE  |
| EVM0016725 | LG13 | nudix hydrolase 27, chloropl  | not DE   | not DE   | not DE   | not DE  |
| EVM0014771 | LG13 | omega-6 fatty acid desaturas  | not DE   | not DE   | not DE   | not DE  |
| EVM0011856 | LG13 | outer envelope pore protein   | not DE   | not DE   | not DE   | not DE  |
| EVM0010256 | LG13 | pathogenesis-related protein  | not DE   | not DE   | not DE   | not DE  |
| EVM0015348 | LG13 | pentatricopeptide repeat-con  | not DE   | not DE   | not DE   | not DE  |
| EVM0008706 | LG13 | pentatricopeptide repeat-con  | not DE   | not DE   | not DE   | not DE  |
| EVM0015399 | LG13 | pentatricopeptide repeat-con  | not DE   | not DE   | not DE   | not DE  |
| EVM0014636 | LG13 | pentatricopeptide repeat-con  | not DE   | not DE   | not DE   | not DE  |
| EVM0003722 | LG13 | pentatricopeptide repeat-con  | not DE   | not DE   | not DE   | not DE  |
| EVM0007413 | LG13 | pentatricopeptide repeat-con  | not DE   | not DE   | not DE   | not DE  |
| EVM0001094 | LG13 | pentatricopeptide repeat-con  | not DE   | not DE   | not DE   | not DE  |
| EVM0012295 | LG13 | pentatricopeptide repeat-con  | not DE   | not DE   | not DE   | not DE  |
| EVM0019841 | LG13 | pentatricopeptide repeat-con  | not DE   | not DE   | not DE   | not DE  |
| EVM0024380 | LG13 | pentatricopeptide repeat-con  | not DE   | not DE   | not DE   | not DE  |
| EVM0011831 | LG13 | pentatricopeptide repeat-con  | 1.87548  | 0.011741 | not DE   | not DE  |
| EVM0009428 | LG13 | pentatricopeptide repeat-con  | not DE   | not DE   | not DE   | not DE  |
| EVM0002955 | LG13 | peroxiredoxin-2E, chloroplas  | not DE   | not DE   | not DE   | not DE  |
| EVM0016949 | LG13 | phenolic glucoside malonyltr  | not DE   | not DE   | -1.26367 | 0.03473 |
| EVM0022802 | LG13 | phenolic glucoside malonyltr  | not DE   | not DE   | not DE   | not DE  |
| EVM0007075 | LG13 | phosphate transporter PHO1 h  | not DE   | not DE   | not DE   | not DE  |
| EVM0020105 | LG13 | phosphate transporter PHO1 h  | not DE   | not DE   | not DE   | not DE  |
| EVM0012561 | LG13 | phosphatidylinositol 4-phosp  | not DE   | not DE   | -2.87841 | 0.01609 |
| EVM0012530 | LG13 | phosphoglycerate kinase 1, c  | not DE   | not DE   | not DE   | not DE  |
| EVM0000072 | LG13 | pleiotropic drug resistance   | not DE   | not DE   | not DE   | not DE  |
| EVM0009979 | LG13 | pleiotropic drug resistance   | not DE   | not DE   | -1.86055 | 0.03599 |
| EVM0010939 | LG13 | pleiotropic drug resistance   | not DE   | not DE   | not DE   | not DE  |
| EVM0024097 | LG13 | probable 2-oxoglutarate/Fe(I  | not DE   | not DE   | not DE   | not DE  |
| EVM0012247 | LG13 | probable 3-deoxy-D-manno-oct  | not DE   | not DE   | not DE   | not DE  |
| EVM0001069 | LG13 | probable ADP-ribosylation fa  | not DE   | not DE   | not DE   | not DE  |
| EVM0007711 | LG13 | probable CCR4-associated fac  | not DE   | not DE   | not DE   | not DE  |
| EVM0000505 | LG13 | probable L-type lectin-domai  | not DE   | not DE   | not DE   | not DE  |
| EVM0001176 | LG13 | probable RNA-binding protein  | not DE   | not DE   | not DE   | not DE  |
| EVM0011137 | LG13 | probable RNA-binding protein  | not DE   | not DE   | not DE   | not DE  |
| EVM0014303 | LG13 | probable RNA-binding protein  | not DE   | not DE   | not DE   | not DE  |
| EVM0019929 | LG13 | probable UDP-N-acetylglucosa  | not DE   | not DE   | not DE   | not DE  |

|            |      |                               |          |          |          |         |
|------------|------|-------------------------------|----------|----------|----------|---------|
| EVM0013857 | LG13 | probable WRKY transcription   | not DE   | not DE   | not DE   | not DE  |
| EVM0002590 | LG13 | probable WRKY transcription   | not DE   | not DE   | not DE   | not DE  |
| EVM0009672 | LG13 | probable apyrase 7-like isof  | not DE   | not DE   | not DE   | not DE  |
| EVM0006207 | LG13 | probable carboxylesterase 17  | not DE   | not DE   | not DE   | not DE  |
| EVM0021896 | LG13 | probable galacturonosyltrans  | not DE   | not DE   | not DE   | not DE  |
| EVM0007563 | LG13 | probable galacturonosyltrans  | not DE   | not DE   | not DE   | not DE  |
| EVM0006268 | LG13 | probable glutamate carboxype  | not DE   | not DE   | not DE   | not DE  |
| EVM0002494 | LG13 | probable glutathione S-trans  | not DE   | not DE   | not DE   | not DE  |
| EVM0020757 | LG13 | probable glutathione S-trans  | 2.233268 | 0.007808 | not DE   | not DE  |
| EVM0015603 | LG13 | probable glycosyltransferase  | 2.876489 | 0.014248 | not DE   | not DE  |
| EVM0004812 | LG13 | probable inactive receptor k  | not DE   | not DE   | not DE   | not DE  |
| EVM0017714 | LG13 | probable inactive receptor k  | not DE   | not DE   | not DE   | not DE  |
| EVM0013456 | LG13 | probable leucine-rich repeat  | not DE   | not DE   | not DE   | not DE  |
| EVM0018546 | LG13 | probable leucine-rich repeat  | not DE   | not DE   | not DE   | not DE  |
| EVM0002001 | LG13 | probable mitochondrial sacch  | not DE   | not DE   | not DE   | not DE  |
| EVM0007571 | LG13 | probable mitochondrial sacch  | not DE   | not DE   | not DE   | not DE  |
| EVM0024456 | LG13 | probable mitochondrial sacch  | not DE   | not DE   | not DE   | not DE  |
| EVM0018218 | LG13 | probable mitochondrial-proce  | not DE   | not DE   | not DE   | not DE  |
| EVM0009139 | LG13 | probable peptide/nitrate tran | not DE   | not DE   | not DE   | not DE  |
| EVM0002763 | LG13 | probable plastid-lipid-assoc  | not DE   | not DE   | not DE   | not DE  |
| EVM0018689 | LG13 | probable protein kinase DDB_  | not DE   | not DE   | not DE   | not DE  |
| EVM0019498 | LG13 | probable protein phosphatase  | not DE   | not DE   | not DE   | not DE  |
| EVM0013762 | LG13 | probable protein phosphatase  | not DE   | not DE   | not DE   | not DE  |
| EVM0008453 | LG13 | probable purple acid phosphat | not DE   | not DE   | not DE   | not DE  |
| EVM0001386 | LG13 | probable receptor-like prote  | not DE   | not DE   | not DE   | not DE  |
| EVM0006010 | LG13 | probable ribosome biogenesis  | not DE   | not DE   | not DE   | not DE  |
| EVM0005865 | LG13 | probable sucrose-phosphatase  | not DE   | not DE   | 1.018415 | 0.00839 |
| EVM0020568 | LG13 | probable tRNA (guanine(26)-N  | not DE   | not DE   | not DE   | not DE  |
| EVM0019034 | LG13 | probable ubiquitin conjugati  | not DE   | not DE   | not DE   | not DE  |
| EVM0015022 | LG13 | proline dehydrogenase 1, mit  | not DE   | not DE   | not DE   | not DE  |
| EVM0018182 | LG13 | proline dehydrogenase 1, mit  | not DE   | not DE   | not DE   | not DE  |
| EVM0014618 | LG13 | proline-rich extensin-like p  | not DE   | not DE   | not DE   | not DE  |
| EVM0004444 | LG13 | prolycopene isomerase, chlor  | not DE   | not DE   | not DE   | not DE  |
| EVM0017472 | LG13 | prolyl 4-hydroxylase subunit  | not DE   | not DE   | not DE   | not DE  |
| EVM0019812 | LG13 | protease Do-like 8, chloropl  | not DE   | not DE   | not DE   | not DE  |
| EVM0008871 | LG13 | protein BUD31 homolog 2       | not DE   | not DE   | not DE   | not DE  |
| EVM0008331 | LG13 | protein CLEC16A-like isoform  | not DE   | not DE   | not DE   | not DE  |
| EVM0006590 | LG13 | protein COBRA                 | not DE   | not DE   | not DE   | not DE  |
| EVM0003820 | LG13 | protein CREG1-like isoform X  | not DE   | not DE   | not DE   | not DE  |
| EVM0021788 | LG13 | protein FAR-RED ELONGATED HY  | not DE   | not DE   | not DE   | not DE  |
| EVM0019471 | LG13 | protein FAR-RED IMPAIRED RES  | not DE   | not DE   | not DE   | not DE  |
| EVM0001714 | LG13 | protein FEZ-like              | not DE   | not DE   | not DE   | not DE  |
| EVM0021748 | LG13 | protein FEZ-like              | not DE   | not DE   | not DE   | not DE  |
| EVM0024646 | LG13 | protein FLX-like 2-like       | not DE   | not DE   | not DE   | not DE  |
| EVM0004704 | LG13 | protein GAMETE EXPRESSED 3    | not DE   | not DE   | not DE   | not DE  |
| EVM0017560 | LG13 | protein GAMETE EXPRESSED 3    | not DE   | not DE   | not DE   | not DE  |
| EVM0006444 | LG13 | protein LONGIFOLIA 1-like is  | not DE   | not DE   | not DE   | not DE  |
| EVM0009263 | LG13 | protein LURP-one-related 15-  | not DE   | not DE   | not DE   | not DE  |
| EVM0019911 | LG13 | protein LURP-one-related 15-  | not DE   | not DE   | not DE   | not DE  |
| EVM0010378 | LG13 | protein LURP-one-related 8-l  | not DE   | not DE   | not DE   | not DE  |
| EVM0005091 | LG13 | protein NRT1/ PTR FAMILY 2.1  | not DE   | not DE   | not DE   | not DE  |
| EVM0013660 | LG13 | protein NRT1/ PTR FAMILY 2.1  | not DE   | not DE   | not DE   | not DE  |
| EVM0016025 | LG13 | protein NRT1/ PTR FAMILY 2.1  | not DE   | not DE   | not DE   | not DE  |
| EVM0021985 | LG13 | protein NRT1/ PTR FAMILY 2.1  | not DE   | not DE   | not DE   | not DE  |

|            |      |                               |          |          |          |         |
|------------|------|-------------------------------|----------|----------|----------|---------|
| EVM0004287 | LG13 | protein NRT1/ PTR FAMILY 5.6  | not DE   | not DE   | -1.32073 | 0.03482 |
| EVM0004355 | LG13 | protein PHR1-LIKE 1-like      | not DE   | not DE   | not DE   | not DE  |
| EVM0005373 | LG13 | protein RIK-like isoform X1   | not DE   | not DE   | not DE   | not DE  |
| EVM0010973 | LG13 | protein ROOT PRIMORDIUM DEFEN | not DE   | not DE   | not DE   | not DE  |
| EVM0011998 | LG13 | protein ROOT PRIMORDIUM DEFEN | not DE   | not DE   | not DE   | not DE  |
| EVM0019592 | LG13 | protein ROOT PRIMORDIUM DEFEN | not DE   | not DE   | not DE   | not DE  |
| EVM0005309 | LG13 | protein RRP5 homolog isoform  | not DE   | not DE   | -1.37721 | 0.00017 |
| EVM0018663 | LG13 | protein SCO1 homolog 1, mito  | not DE   | not DE   | not DE   | not DE  |
| EVM0021999 | LG13 | protein YLS7-like             | not DE   | not DE   | not DE   | not DE  |
| EVM0004334 | LG13 | protein ZINC INDUCED FACILIT  | not DE   | not DE   | not DE   | not DE  |
| EVM0011473 | LG13 | protein downstream neighbor   | not DE   | not DE   | not DE   | not DE  |
| EVM0016865 | LG13 | protein transport protein Sen | not DE   | not DE   | not DE   | not DE  |
| EVM0002099 | LG13 | proton-coupled amino acid tra | 4.055565 | 2.53E-05 | not DE   | not DE  |
| EVM0022776 | LG13 | putative Dol-P-Glc:Glc(2)Man  | not DE   | not DE   | not DE   | not DE  |
| EVM0016668 | LG13 | putative auxin efflux carrier | not DE   | not DE   | not DE   | not DE  |
| EVM0009397 | LG13 | putative deoxyribonuclease T  | not DE   | not DE   | not DE   | not DE  |
| EVM0017005 | LG13 | putative deoxyribonuclease T  | not DE   | not DE   | not DE   | not DE  |
| EVM0003815 | LG13 | putative endo-1,3(4)-beta-gl  | not DE   | not DE   | not DE   | not DE  |
| EVM0018399 | LG13 | putative leucine-rich repeat  | not DE   | not DE   | not DE   | not DE  |
| EVM0000022 | LG13 | putative nuclear matrix cons  | not DE   | not DE   | not DE   | not DE  |
| EVM0012940 | LG13 | putative pentatricopeptide r  | not DE   | not DE   | not DE   | not DE  |
| EVM0006899 | LG13 | putative pentatricopeptide r  | not DE   | not DE   | not DE   | not DE  |
| EVM0020224 | LG13 | putative pentatricopeptide r  | not DE   | not DE   | not DE   | not DE  |
| EVM0013068 | LG13 | putative peptide/nitrate tran | not DE   | not DE   | not DE   | not DE  |
| EVM0020602 | LG13 | putative phosphatidylglycerol | not DE   | not DE   | not DE   | not DE  |
| EVM0016958 | LG13 | putative receptor protein kin | not DE   | not DE   | not DE   | not DE  |
| EVM0019493 | LG13 | putative receptor-like prote  | not DE   | not DE   | not DE   | not DE  |
| EVM0016695 | LG13 | putative uncharacterized zin  | not DE   | not DE   | not DE   | not DE  |
| EVM0019012 | LG13 | putative vacuolar protein sc  | not DE   | not DE   | not DE   | not DE  |
| EVM0015276 | LG13 | putative vacuolar protein sc  | not DE   | not DE   | not DE   | not DE  |
| EVM0006144 | LG13 | putative white-brown complex  | not DE   | not DE   | not DE   | not DE  |
| EVM0013295 | LG13 | replication protein A 14 kDa  | not DE   | not DE   | 1.880336 | 0.0009  |
| EVM0013726 | LG13 | reticulon-like protein B12 i  | not DE   | not DE   | not DE   | not DE  |
| EVM0021478 | LG13 | rhodanese-like domain-contai  | -1.14352 | 0.015342 | not DE   | not DE  |
| EVM0003272 | LG13 | rhodanese-like domain-contai  | -1.72522 | 0.013818 | not DE   | not DE  |
| EVM0008040 | LG13 | ribosome biogenesis protein   | not DE   | not DE   | not DE   | not DE  |
| EVM0018633 | LG13 | ribosome production factor 2  | not DE   | not DE   | not DE   | not DE  |
| EVM0008720 | LG13 | secoisolariciresinol dehydro  | not DE   | not DE   | not DE   | not DE  |
| EVM0020799 | LG13 | secoisolariciresinol dehydro  | not DE   | not DE   | not DE   | not DE  |
| EVM0011225 | LG13 | selT-like protein             | not DE   | not DE   | not DE   | not DE  |
| EVM0014737 | LG13 | senescence-associated carbox  | not DE   | not DE   | not DE   | not DE  |
| EVM0016576 | LG13 | serine/arginine-rich splicin  | -3.11831 | 1.02E-17 | -1.75741 | #####   |
| EVM0014148 | LG13 | soluble inorganic pyrophosph  | not DE   | not DE   | not DE   | not DE  |
| EVM0004618 | LG13 | solute carrier family 35 mem  | not DE   | not DE   | not DE   | not DE  |
| EVM0011954 | LG13 | solute carrier family 35 mem  | not DE   | not DE   | not DE   | not DE  |
| EVM0016355 | LG13 | solute carrier family 35 mem  | not DE   | not DE   | not DE   | not DE  |
| EVM0023373 | LG13 | sorting nexin 1-like isoform  | not DE   | not DE   | not DE   | not DE  |
| EVM0014433 | LG13 | splicing factor 3A subunit 2  | not DE   | not DE   | not DE   | not DE  |
| EVM0016950 | LG13 | splicing factor U2af small s  | not DE   | not DE   | not DE   | not DE  |
| EVM0017938 | LG13 | steroid 5-alpha-reductase DE  | not DE   | not DE   | not DE   | not DE  |
| EVM0006476 | LG13 | subtilisin-like protease SBT  | not DE   | not DE   | not DE   | not DE  |
| EVM0001953 | LG13 | syntaxin-71-like              | not DE   | not DE   | not DE   | not DE  |
| EVM0008899 | LG13 | thaumatin-like protein 1-lik  | not DE   | not DE   | not DE   | not DE  |
| EVM0004247 | LG13 | thaumatin-like protein-like   | not DE   | not DE   | not DE   | not DE  |

|            |      |                              |          |          |          |         |
|------------|------|------------------------------|----------|----------|----------|---------|
| EVM0022678 | LG13 | thioredoxin-like protein AAE | not DE   | not DE   | not DE   | not DE  |
| EVM0002262 | LG13 | thyroid adenoma-associated p | not DE   | not DE   | not DE   | not DE  |
| EVM0004923 | LG13 | thyroid adenoma-associated p | not DE   | not DE   | not DE   | not DE  |
| EVM0010272 | LG13 | thyroid adenoma-associated p | not DE   | not DE   | not DE   | not DE  |
| EVM0008158 | LG13 | trafficking protein particle | not DE   | not DE   | not DE   | not DE  |
| EVM0009780 | LG13 | trafficking protein particle | not DE   | not DE   | not DE   | not DE  |
| EVM0023685 | LG13 | transcription factor CYCLOID | not DE   | not DE   | not DE   | not DE  |
| EVM0006828 | LG13 | transcription factor E2FA-li | 1.070516 | 0.009382 | not DE   | not DE  |
| EVM0019980 | LG13 | transcription factor EMB1444 | not DE   | not DE   | not DE   | not DE  |
| EVM0015292 | LG13 | transcription factor TCP11-l | not DE   | not DE   | not DE   | not DE  |
| EVM0003092 | LG13 | transcription factor bHLH135 | not DE   | not DE   | not DE   | not DE  |
| EVM0006485 | LG13 | transcription factor bHLH135 | not DE   | not DE   | not DE   | not DE  |
| EVM0016483 | LG13 | transcription factor bHLH140 | not DE   | not DE   | not DE   | not DE  |
| EVM0004884 | LG13 | transcription factor-like pr | not DE   | not DE   | not DE   | not DE  |
| EVM0005068 | LG13 | transcription initiation fac | not DE   | not DE   | not DE   | not DE  |
| EVM0009131 | LG13 | transcription initiation fac | not DE   | not DE   | not DE   | not DE  |
| EVM0019735 | LG13 | transcription initiation fac | not DE   | not DE   | not DE   | not DE  |
| EVM0013287 | LG13 | transcriptional regulator TA | not DE   | not DE   | not DE   | not DE  |
| EVM0019733 | LG13 | translin-like                | not DE   | not DE   | not DE   | not DE  |
| EVM0004810 | LG13 | transposon Ty3-G Gag-Pol pol | not DE   | not DE   | not DE   | not DE  |
| EVM0005254 | LG13 | trihelix transcription facto | not DE   | not DE   | not DE   | not DE  |
| EVM0004099 | LG13 | tropinone reductase homolog  | not DE   | not DE   | not DE   | not DE  |
| EVM0006032 | LG13 | tropinone reductase homolog  | not DE   | not DE   | not DE   | not DE  |
| EVM0004225 | LG13 | tropinone reductase homolog  | not DE   | not DE   | not DE   | not DE  |
| EVM0001378 | LG13 | tubulin alpha chain-like     | not DE   | not DE   | 7.412146 | 0.00084 |
| EVM0013488 | LG13 | two-component response regul | not DE   | not DE   | not DE   | not DE  |
| EVM0006575 | LG13 | type I inositol 1,4,5-trisph | not DE   | not DE   | not DE   | not DE  |
| EVM0001211 | LG13 | ubiquitin carboxyl-terminal  | not DE   | not DE   | not DE   | not DE  |
| EVM0014455 | LG13 | ubiquitin receptor RAD23c-li | not DE   | not DE   | not DE   | not DE  |
| EVM0015550 | LG13 | ubiquitin receptor RAD23c-li | not DE   | not DE   | not DE   | not DE  |
| EVM0012215 | LG13 | ubiquitin-activating enzyme  | not DE   | not DE   | not DE   | not DE  |
| EVM0007978 | LG13 | ubiquitin-conjugating enzyme | not DE   | not DE   | not DE   | not DE  |
| EVM0013292 | LG13 | ubiquitin-conjugating enzyme | not DE   | not DE   | not DE   | not DE  |
| EVM0002205 | LG13 | uncharacterized CRM domain-c | not DE   | not DE   | not DE   | not DE  |
| EVM0017730 | LG13 | uncharacterized CRM domain-c | not DE   | not DE   | not DE   | not DE  |
| EVM0003944 | LG13 | uncharacterized acetyltransf | not DE   | not DE   | not DE   | not DE  |
| EVM0021787 | LG13 | uncharacterized acetyltransf | not DE   | not DE   | not DE   | not DE  |
| EVM0004877 | LG13 | uncharacterized membrane pro | not DE   | not DE   | not DE   | not DE  |
| EVM0004117 | LG13 | uncharacterized membrane pro | not DE   | not DE   | -1.9991  | 0.02255 |
| EVM0020056 | LG13 | uncharacterized permease C29 | not DE   | not DE   | not DE   | not DE  |
| EVM0018956 | LG13 | uncharacterized protein At1g | not DE   | not DE   | not DE   | not DE  |
| EVM0011800 | LG13 | uncharacterized protein At1g | not DE   | not DE   | not DE   | not DE  |
| EVM0005005 | LG13 | uncharacterized protein At1g | not DE   | not DE   | not DE   | not DE  |
| EVM0021623 | LG13 | uncharacterized protein At1g | not DE   | not DE   | not DE   | not DE  |
| EVM0012903 | LG13 | uncharacterized protein At2g | not DE   | not DE   | not DE   | not DE  |
| EVM0007225 | LG13 | uncharacterized protein At2g | not DE   | not DE   | not DE   | not DE  |
| EVM0009599 | LG13 | uncharacterized protein At2g | not DE   | not DE   | not DE   | not DE  |
| EVM0000548 | LG13 | uncharacterized protein At3g | not DE   | not DE   | not DE   | not DE  |
| EVM0007261 | LG13 | uncharacterized protein At3g | not DE   | not DE   | not DE   | not DE  |
| EVM0018011 | LG13 | uncharacterized protein At3g | not DE   | not DE   | not DE   | not DE  |
| EVM0018293 | LG13 | uncharacterized protein At3g | not DE   | not DE   | not DE   | not DE  |
| EVM0020989 | LG13 | uncharacterized protein At4g | -2.30533 | 0.003796 | not DE   | not DE  |
| EVM0005731 | LG13 | uncharacterized protein At4g | not DE   | not DE   | not DE   | not DE  |
| EVM0018418 | LG13 | uncharacterized protein At5g | not DE   | not DE   | not DE   | not DE  |

|            |      |                              |          |          |          |         |
|------------|------|------------------------------|----------|----------|----------|---------|
| EVM0011557 | LG13 | uncharacterized protein LOC1 | not DE   | not DE   | 2.070903 | 0.00046 |
| EVM0010763 | LG13 | uncharacterized protein LOC1 | not DE   | not DE   | not DE   | not DE  |
| EVM0022004 | LG13 | uncharacterized protein LOC1 | not DE   | not DE   | not DE   | not DE  |
| EVM0010561 | LG13 | uncharacterized protein LOC1 | not DE   | not DE   | not DE   | not DE  |
| EVM0021177 | LG13 | uncharacterized protein LOC1 | not DE   | not DE   | not DE   | not DE  |
| EVM0001477 | LG13 | uncharacterized protein LOC1 | not DE   | not DE   | -1.53534 | 0.02879 |
| EVM0006265 | LG13 | uncharacterized protein LOC1 | not DE   | not DE   | not DE   | not DE  |
| EVM0017200 | LG13 | uncharacterized protein LOC1 | not DE   | not DE   | not DE   | not DE  |
| EVM0021705 | LG13 | uncharacterized protein LOC1 | not DE   | not DE   | 1.043532 | 0.01021 |
| EVM0024552 | LG13 | uncharacterized protein LOC1 | not DE   | not DE   | not DE   | not DE  |
| EVM0022905 | LG13 | uncharacterized protein LOC1 | not DE   | not DE   | not DE   | not DE  |
| EVM0017875 | LG13 | uncharacterized protein LOC1 | not DE   | not DE   | not DE   | not DE  |
| EVM0008932 | LG13 | uncharacterized protein LOC1 | not DE   | not DE   | not DE   | not DE  |
| EVM0023827 | LG13 | uncharacterized protein LOC1 | not DE   | not DE   | not DE   | not DE  |
| EVM0016654 | LG13 | uncharacterized protein LOC1 | not DE   | not DE   | not DE   | not DE  |
| EVM0023226 | LG13 | uncharacterized protein LOC1 | not DE   | not DE   | not DE   | not DE  |
| EVM0016541 | LG13 | uncharacterized protein LOC1 | not DE   | not DE   | not DE   | not DE  |
| EVM0023384 | LG13 | uncharacterized protein LOC1 | not DE   | not DE   | not DE   | not DE  |
| EVM0024002 | LG13 | uncharacterized protein LOC1 | not DE   | not DE   | not DE   | not DE  |
| EVM0009128 | LG13 | uncharacterized protein LOC1 | not DE   | not DE   | not DE   | not DE  |
| EVM0001184 | LG13 | uncharacterized protein LOC1 | not DE   | not DE   | not DE   | not DE  |
| EVM0001308 | LG13 | uncharacterized protein LOC1 | not DE   | not DE   | not DE   | not DE  |
| EVM0011786 | LG13 | uncharacterized protein LOC1 | not DE   | not DE   | not DE   | not DE  |
| EVM0020296 | LG13 | uncharacterized protein LOC1 | not DE   | not DE   | not DE   | not DE  |
| EVM0006661 | LG13 | uncharacterized protein LOC1 | not DE   | not DE   | not DE   | not DE  |
| EVM0014104 | LG13 | uncharacterized protein LOC1 | not DE   | not DE   | not DE   | not DE  |
| EVM0000775 | LG13 | uncharacterized protein LOC1 | not DE   | not DE   | not DE   | not DE  |
| EVM0000121 | LG13 | uncharacterized protein LOC1 | not DE   | not DE   | not DE   | not DE  |
| EVM0019527 | LG13 | uncharacterized protein LOC1 | not DE   | not DE   | not DE   | not DE  |
| EVM0000820 | LG13 | uncharacterized protein LOC1 | not DE   | not DE   | not DE   | not DE  |
| EVM0010300 | LG13 | uncharacterized protein LOC1 | 1.479024 | 0.010845 | not DE   | not DE  |
| EVM0019040 | LG13 | uncharacterized protein LOC1 | not DE   | not DE   | not DE   | not DE  |
| EVM0003607 | LG13 | uncharacterized protein LOC1 | not DE   | not DE   | not DE   | not DE  |
| EVM0005646 | LG13 | uncharacterized protein LOC1 | not DE   | not DE   | not DE   | not DE  |
| EVM0013859 | LG13 | uncharacterized protein LOC1 | not DE   | not DE   | not DE   | not DE  |
| EVM0014843 | LG13 | uncharacterized protein LOC1 | not DE   | not DE   | not DE   | not DE  |
| EVM0016459 | LG13 | uncharacterized protein LOC1 | not DE   | not DE   | not DE   | not DE  |
| EVM0012827 | LG13 | uncharacterized protein LOC1 | not DE   | not DE   | not DE   | not DE  |
| EVM0015429 | LG13 | uncharacterized protein LOC1 | not DE   | not DE   | not DE   | not DE  |
| EVM0020249 | LG13 | uncharacterized protein LOC1 | not DE   | not DE   | not DE   | not DE  |
| EVM0013659 | LG13 | uncharacterized protein LOC1 | not DE   | not DE   | not DE   | not DE  |
| EVM0019712 | LG13 | uncharacterized protein LOC1 | not DE   | not DE   | not DE   | not DE  |
| EVM0009641 | LG13 | uncharacterized protein LOC1 | not DE   | not DE   | not DE   | not DE  |
| EVM0014728 | LG13 | uncharacterized protein LOC1 | not DE   | not DE   | not DE   | not DE  |
| EVM0005131 | LG13 | uncharacterized protein LOC1 | not DE   | not DE   | not DE   | not DE  |
| EVM0000994 | LG13 | uncharacterized protein LOC1 | not DE   | not DE   | not DE   | not DE  |
| EVM0017379 | LG13 | uncharacterized protein LOC1 | 4.24887  | 0.001882 | not DE   | not DE  |
| EVM0000560 | LG13 | uncharacterized protein LOC1 | not DE   | not DE   | not DE   | not DE  |
| EVM0023156 | LG13 | uncharacterized protein LOC1 | not DE   | not DE   | not DE   | not DE  |
| EVM0018524 | LG13 | uncharacterized protein LOC1 | not DE   | not DE   | not DE   | not DE  |
| EVM0018694 | LG13 | uncharacterized protein LOC1 | not DE   | not DE   | not DE   | not DE  |
| EVM0015894 | LG13 | uncharacterized protein LOC1 | not DE   | not DE   | 4.93804  | 0.00347 |
| EVM0005414 | LG13 | uncharacterized protein LOC1 | not DE   | not DE   | not DE   | not DE  |
| EVM0014084 | LG13 | uncharacterized protein LOC1 | not DE   | not DE   | not DE   | not DE  |



|            |      |                              |          |          |          |         |
|------------|------|------------------------------|----------|----------|----------|---------|
| EVM0006285 | LG13 | uncharacterized protein LOC1 | not DE   | not DE   | not DE   | not DE  |
| EVM0019279 | LG13 | uncharacterized protein LOC1 | not DE   | not DE   | not DE   | not DE  |
| EVM0015132 | LG13 | uncharacterized protein LOC1 | not DE   | not DE   | not DE   | not DE  |
| EVM0020821 | LG13 | uncharacterized protein LOC1 | not DE   | not DE   | not DE   | not DE  |
| EVM0021805 | LG13 | uncharacterized protein LOC1 | not DE   | not DE   | not DE   | not DE  |
| EVM0001544 | LG13 | uncharacterized protein LOC1 | not DE   | not DE   | not DE   | not DE  |
| EVM0012832 | LG13 | uncharacterized protein LOC1 | not DE   | not DE   | not DE   | not DE  |
| EVM0002269 | LG13 | uncharacterized protein LOC1 | not DE   | not DE   | not DE   | not DE  |
| EVM0019626 | LG13 | uncharacterized protein LOC1 | not DE   | not DE   | not DE   | not DE  |
| EVM0018748 | LG13 | uncharacterized protein LOC1 | not DE   | not DE   | 2.544961 | 0.00626 |
| EVM0020866 | LG13 | uncharacterized protein LOC1 | not DE   | not DE   | -1.06632 | 0.00054 |
| EVM0018849 | LG13 | uncharacterized protein LOC1 | not DE   | not DE   | not DE   | not DE  |
| EVM0016588 | LG13 | uncharacterized protein LOC1 | not DE   | not DE   | not DE   | not DE  |
| EVM0012980 | LG13 | uncharacterized protein LOC1 | not DE   | not DE   | not DE   | not DE  |
| EVM0019789 | LG13 | uncharacterized protein LOC1 | not DE   | not DE   | not DE   | not DE  |
| EVM0017414 | LG13 | uncharacterized protein LOC1 | not DE   | not DE   | -1.57191 | 0.02128 |
| EVM0013123 | LG13 | uncharacterized protein LOC1 | not DE   | not DE   | not DE   | not DE  |
| EVM0012187 | LG13 | uncharacterized protein LOC1 | 1.032082 | 0.001553 | not DE   | not DE  |
| EVM0008663 | LG13 | uncharacterized protein LOC1 | not DE   | not DE   | not DE   | not DE  |
| EVM0009099 | LG13 | uncharacterized protein LOC1 | not DE   | not DE   | not DE   | not DE  |
| EVM0024131 | LG13 | uncharacterized protein LOC1 | not DE   | not DE   | not DE   | not DE  |
| EVM0004139 | LG13 | uncharacterized protein LOC1 | not DE   | not DE   | not DE   | not DE  |
| EVM0009628 | LG13 | uncharacterized protein LOC1 | not DE   | not DE   | not DE   | not DE  |
| EVM0021449 | LG13 | uncharacterized protein LOC1 | not DE   | not DE   | not DE   | not DE  |
| EVM0013751 | LG13 | uncharacterized protein LOC1 | not DE   | not DE   | not DE   | not DE  |
| EVM0008479 | LG13 | uncharacterized protein LOC1 | not DE   | not DE   | not DE   | not DE  |
| EVM0018058 | LG13 | uncharacterized protein LOC1 | not DE   | not DE   | not DE   | not DE  |
| EVM0006323 | LG13 | uncharacterized protein LOC1 | not DE   | not DE   | -1.2175  | #####   |
| EVM0003333 | LG13 | uncharacterized protein LOC1 | not DE   | not DE   | not DE   | not DE  |
| EVM0007903 | LG13 | uncharacterized protein LOC1 | not DE   | not DE   | not DE   | not DE  |
| EVM0023985 | LG13 | uncharacterized protein LOC1 | not DE   | not DE   | not DE   | not DE  |
| EVM0007807 | LG13 | uncharacterized protein LOC1 | not DE   | not DE   | not DE   | not DE  |
| EVM0000520 | LG13 | uncharacterized protein LOC1 | not DE   | not DE   | 1.257485 | #####   |
| EVM0009658 | LG13 | uncharacterized protein LOC1 | not DE   | not DE   | not DE   | not DE  |
| EVM0011409 | LG13 | uncharacterized protein LOC1 | not DE   | not DE   | not DE   | not DE  |
| EVM0012974 | LG13 | uncharacterized protein LOC1 | not DE   | not DE   | not DE   | not DE  |
| EVM0003005 | LG13 | uncharacterized protein LOC1 | not DE   | not DE   | not DE   | not DE  |
| EVM0003975 | LG13 | uncharacterized protein LOC1 | not DE   | not DE   | not DE   | not DE  |
| EVM0005605 | LG13 | uncharacterized protein LOC1 | not DE   | not DE   | not DE   | not DE  |
| EVM0022025 | LG13 | uncharacterized protein LOC1 | not DE   | not DE   | not DE   | not DE  |
| EVM0012391 | LG13 | uncharacterized protein LOC1 | -2.11266 | 0.039199 | -1.70794 | 0.00961 |
| EVM0011300 | LG13 | uncharacterized protein LOC1 | not DE   | not DE   | not DE   | not DE  |
| EVM0017327 | LG13 | uncharacterized protein LOC1 | not DE   | not DE   | not DE   | not DE  |
| EVM0021521 | LG13 | uncharacterized protein LOC1 | not DE   | not DE   | not DE   | not DE  |
| EVM0019219 | LG13 | uncharacterized protein LOC1 | not DE   | not DE   | not DE   | not DE  |
| EVM0001652 | LG13 | uncharacterized protein LOC1 | not DE   | not DE   | not DE   | not DE  |
| EVM0015414 | LG13 | uncharacterized protein LOC1 | not DE   | not DE   | not DE   | not DE  |
| EVM0004987 | LG13 | uncharacterized protein LOC1 | not DE   | not DE   | not DE   | not DE  |
| EVM0017269 | LG13 | uncharacterized protein LOC1 | not DE   | not DE   | not DE   | not DE  |
| EVM0001814 | LG13 | uncharacterized protein LOC1 | not DE   | not DE   | 2.092733 | #####   |
| EVM0004670 | LG13 | uncharacterized protein LOC1 | not DE   | not DE   | not DE   | not DE  |
| EVM0013899 | LG13 | uncharacterized protein LOC1 | not DE   | not DE   | not DE   | not DE  |
| EVM0024207 | LG13 | uncharacterized protein LOC1 | not DE   | not DE   | 1.05191  | #####   |
| EVM0022198 | LG13 | uncharacterized protein LOC1 | not DE   | not DE   | not DE   | not DE  |

|            |      |                                         |          |          |          |         |
|------------|------|-----------------------------------------|----------|----------|----------|---------|
| EVM0021213 | LG13 | uncharacterized protein LOC1            | -2.07154 | 1.48E-11 | not DE   | not DE  |
| EVM0015720 | LG13 | uncharacterized protein LOC1            | not DE   | not DE   | not DE   | not DE  |
| EVM0016323 | LG13 | uncharacterized protein LOC1            | not DE   | not DE   | not DE   | not DE  |
| EVM0003535 | LG13 | uncharacterized protein LOC1            | not DE   | not DE   | not DE   | not DE  |
| EVM0019702 | LG13 | uncharacterized protein LOC1            | not DE   | not DE   | not DE   | not DE  |
| EVM0016052 | LG13 | uncharacterized protein LOC1            | not DE   | not DE   | not DE   | not DE  |
| EVM0013261 | LG13 | uncharacterized protein LOC1            | not DE   | not DE   | not DE   | not DE  |
| EVM0008589 | LG13 | uncharacterized protein LOC1            | -2.23932 | 0.011321 | not DE   | not DE  |
| EVM0012547 | LG13 | uncharacterized protein LOC1            | not DE   | not DE   | not DE   | not DE  |
| EVM0023838 | LG13 | uncharacterized protein LOC1            | not DE   | not DE   | not DE   | not DE  |
| EVM0012793 | LG13 | uncharacterized protein LOC1            | not DE   | not DE   | not DE   | not DE  |
| EVM0014426 | LG13 | uncharacterized protein LOC1            | not DE   | not DE   | not DE   | not DE  |
| EVM0013365 | LG13 | uncharacterized protein LOC1            | not DE   | not DE   | 1.024698 | 0.00016 |
| EVM0016495 | LG13 | uncharacterized protein LOC1            | not DE   | not DE   | not DE   | not DE  |
| EVM0010803 | LG13 | uncharacterized protein LOC1            | not DE   | not DE   | not DE   | not DE  |
| EVM0003677 | LG13 | uncharacterized protein LOC1            | not DE   | not DE   | not DE   | not DE  |
| EVM0001244 | LG13 | uncharacterized protein LOC1            | not DE   | not DE   | not DE   | not DE  |
| EVM0001229 | LG13 | uncharacterized protein LOC1            | not DE   | not DE   | not DE   | not DE  |
| EVM0001121 | LG13 | universal stress protein A-like         | not DE   | not DE   | not DE   | not DE  |
| EVM0018076 | LG13 | vacuolar amino acid transporter         | not DE   | not DE   | not DE   | not DE  |
| EVM0016487 | LG13 | vacuolar cation/proton exchanger        | 3.597555 | 1.94E-07 | 1.26383  | 0.00014 |
| EVM0015663 | LG13 | vacuolar protein sorting-associated     | not DE   | not DE   | not DE   | not DE  |
| EVM0024352 | LG13 | very-long-chain enoyl-CoA reductase     | not DE   | not DE   | not DE   | not DE  |
| EVM0011031 | LG13 | vesicle transport v-SNARE 13            | not DE   | not DE   | not DE   | not DE  |
| EVM0013399 | LG13 | wall-associated receptor kinase         | not DE   | not DE   | not DE   | not DE  |
| EVM0021014 | LG13 | xylem serine proteinase 1-like          | not DE   | not DE   | not DE   | not DE  |
| EVM0000004 | LG13 | xylosyltransferase 1                    | -1.111   | 0.003559 | not DE   | not DE  |
| EVM0009545 | LG13 | xylosyltransferase 2-like               | not DE   | not DE   | not DE   | not DE  |
| EVM0020166 | LG13 | zinc finger A20 and AN1 domain          | 1.014201 | 0.013229 | not DE   | not DE  |
| EVM0019737 | LG13 | zinc finger BED domain-containing       | not DE   | not DE   | not DE   | not DE  |
| EVM0004054 | LG13 | zinc finger CCCH domain-containing      | not DE   | not DE   | not DE   | not DE  |
| EVM0017487 | LG13 | zinc finger protein 593 homolog         | not DE   | not DE   | 1.280084 | 0.00447 |
| EVM0021085 | LG13 | zinc finger protein ZAT5-like           | not DE   | not DE   | not DE   | not DE  |
| EVM0016552 | LG13 | zinc transporter 5                      | not DE   | not DE   | not DE   | not DE  |
| EVM0005361 | LG13 | zinc transporter 8-like                 | not DE   | not DE   | not DE   | not DE  |
| EVM0006916 | LG13 | 14-3-3 protein                          | not DE   | not DE   | not DE   | not DE  |
| EVM0000296 | LG13 | 18 kDa seed maturation protein          | 5.594123 | 0.000814 | 3.128599 | 0.0432  |
| EVM0009699 | LG13 | 2-cysteine peroxiredoxin B              | not DE   | not DE   | not DE   | not DE  |
| EVM0009938 | LG13 | 39S ribosomal L41-A, mitochondrial      | not DE   | not DE   | not DE   | not DE  |
| EVM0018962 | LG13 | 39S ribosomal L41-A, mitochondrial      | not DE   | not DE   | not DE   | not DE  |
| EVM0008429 | LG13 | 50S ribosomal protein L23 (chloroplast) | -2.63915 | 0.021273 | not DE   | not DE  |
| EVM0014602 | LG13 | 5'-AMP-activated protein kinase         | not DE   | not DE   | not DE   | not DE  |
| EVM0011566 | LG13 | 60S acidic ribosomal protein            | not DE   | not DE   | not DE   | not DE  |
| EVM0000921 | LG13 | ABC transporter family protein          | not DE   | not DE   | not DE   | not DE  |
| EVM0013457 | LG13 | ABC transporter family protein          | not DE   | not DE   | not DE   | not DE  |
| EVM0000142 | LG13 | ABC-2 type transporter family           | not DE   | not DE   | not DE   | not DE  |
| EVM0005622 | LG13 | ABC-2 type transporter family           | not DE   | not DE   | not DE   | not DE  |
| EVM0010242 | LG13 | ABC-2 type transporter family           | not DE   | not DE   | not DE   | not DE  |
| EVM0015404 | LG13 | ABC-2 type transporter family           | not DE   | not DE   | not DE   | not DE  |
| EVM0022257 | LG13 | AP2/B3-like transcription factor        | 3.391552 | 0.00173  | not DE   | not DE  |
| EVM0003973 | LG13 | ARM repeat superfamily protein          | not DE   | not DE   | not DE   | not DE  |
| EVM0022852 | LG13 | ATP binding protein, putative           | not DE   | not DE   | not DE   | not DE  |
| EVM0022526 | LG13 | ATPP2-A13, putative                     | not DE   | not DE   | not DE   | not DE  |
| EVM0018378 | LG13 | ATPase, V0/A0 complex, subunit          | not DE   | not DE   | not DE   | not DE  |

|            |      |                                |          |          |          |         |
|------------|------|--------------------------------|----------|----------|----------|---------|
| EVM0020012 | LG13 | Actin-11                       | not DE   | not DE   | not DE   | not DE  |
| EVM0010138 | LG13 | Acyl-CoA oxidase 4             | not DE   | not DE   | not DE   | not DE  |
| EVM0001805 | LG13 | Acylphosphatase                | not DE   | not DE   | not DE   | not DE  |
| EVM0014311 | LG13 | Acylphosphatase                | -3.94781 | 1.10E-31 | -2.0283  | #####   |
| EVM0015873 | LG13 | Alpha carbonic anhydrase 1, p  | not DE   | not DE   | not DE   | not DE  |
| EVM0022121 | LG13 | Alpha carbonic anhydrase 1, p  | not DE   | not DE   | not DE   | not DE  |
| EVM0007901 | LG13 | Alpha carbonic anhydrase 7 is  | not DE   | not DE   | not DE   | not DE  |
| EVM0014395 | LG13 | Alpha carbonic anhydrase 7 is  | not DE   | not DE   | not DE   | not DE  |
| EVM0002207 | LG13 | Alpha-expansin 19              | not DE   | not DE   | not DE   | not DE  |
| EVM0005003 | LG13 | Alpha-expansin 3 precursor     | not DE   | not DE   | not DE   | not DE  |
| EVM0004097 | LG13 | Alpha/beta-Hydrolases superfa  | not DE   | not DE   | not DE   | not DE  |
| EVM0019429 | LG13 | Aquaporin PIP2.2, putative     | not DE   | not DE   | not DE   | not DE  |
| EVM0001306 | LG13 | BP8                            | not DE   | not DE   | not DE   | not DE  |
| EVM0013732 | LG13 | Basic-leucine zipper transcri  | not DE   | not DE   | not DE   | not DE  |
| EVM0021491 | LG13 | Basic-leucine zipper transcri  | not DE   | not DE   | not DE   | not DE  |
| EVM0008626 | LG13 | Binding protein, putative iso  | not DE   | not DE   | not DE   | not DE  |
| EVM0008903 | LG13 | BnaC01g23250D                  | not DE   | not DE   | not DE   | not DE  |
| EVM0022657 | LG13 | BnaC05g41680D                  | not DE   | not DE   | not DE   | not DE  |
| EVM0015108 | LG13 | C2H2-like zinc finger protein  | not DE   | not DE   | not DE   | not DE  |
| EVM0002799 | LG13 | CASP-like protein              | not DE   | not DE   | not DE   | not DE  |
| EVM0005584 | LG13 | CDK5RAP3-like protein          | not DE   | not DE   | not DE   | not DE  |
| EVM0011812 | LG13 | Caffeic acid 3-O-methyltransf  | not DE   | not DE   | not DE   | not DE  |
| EVM0013164 | LG13 | Calcium-dependent lipid-bindin | not DE   | not DE   | not DE   | not DE  |
| EVM0015614 | LG13 | Calcium/lipid-binding (CaLB)   | not DE   | not DE   | not DE   | not DE  |
| EVM0012310 | LG13 | Calmodulin-binding family pro  | not DE   | not DE   | not DE   | not DE  |
| EVM0009751 | LG13 | Cell wall invertase 2 isoform  | not DE   | not DE   | 2.647294 | 0.00701 |
| EVM0023929 | LG13 | Chloroplast signal recognitio  | not DE   | not DE   | not DE   | not DE  |
| EVM0018644 | LG13 | Component of oligomeric golgi  | not DE   | not DE   | not DE   | not DE  |
| EVM0004991 | LG13 | Copper transporter, putative   | not DE   | not DE   | not DE   | not DE  |
| EVM0004270 | LG13 | Cytochrome B561-1 isoform 1    | not DE   | not DE   | not DE   | not DE  |
| EVM0015166 | LG13 | Cytochrome c oxidase biogenes  | not DE   | not DE   | not DE   | not DE  |
| EVM0008906 | LG13 | D-alanine--D-alanine ligase f  | not DE   | not DE   | not DE   | not DE  |
| EVM0005043 | LG13 | DNA binding with one finger 2  | not DE   | not DE   | not DE   | not DE  |
| EVM0023664 | LG13 | DNA-binding bromodomain-conta  | not DE   | not DE   | not DE   | not DE  |
| EVM0009629 | LG13 | DNA-binding protein S1FA1      | -1.67537 | 1.01E-05 | not DE   | not DE  |
| EVM0007008 | LG13 | Dehydration-responsive elemen  | not DE   | not DE   | not DE   | not DE  |
| EVM0016628 | LG13 | Dehydration-responsive elemen  | not DE   | not DE   | not DE   | not DE  |
| EVM0021462 | LG13 | Duplicated homeodomain-like s  | not DE   | not DE   | not DE   | not DE  |
| EVM0004057 | LG13 | Elongation factor P family pr  | not DE   | not DE   | not DE   | not DE  |
| EVM0008978 | LG13 | Emb:CAB82953.1, putative       | not DE   | not DE   | not DE   | not DE  |
| EVM0015615 | LG13 | Emp24/gp25L/p24 family/GOLD f  | not DE   | not DE   | not DE   | not DE  |
| EVM0022862 | LG13 | Eukaryotic release factor 1 (  | not DE   | not DE   | not DE   | not DE  |
| EVM0019770 | LG13 | Exocyst subunit exo70 family   | not DE   | not DE   | not DE   | not DE  |
| EVM0001443 | LG13 | F-box family protein, putativ  | not DE   | not DE   | not DE   | not DE  |
| EVM0022307 | LG13 | F21M11.16 protein isoform 1    | not DE   | not DE   | not DE   | not DE  |
| EVM0001318 | LG13 | FAD-binding Berberine family   | not DE   | not DE   | not DE   | not DE  |
| EVM0010716 | LG13 | FAD-binding Berberine family   | not DE   | not DE   | not DE   | not DE  |
| EVM0019888 | LG13 | FAD-binding Berberine family   | not DE   | not DE   | not DE   | not DE  |
| EVM0015943 | LG13 | FAR1-related sequence 5        | not DE   | not DE   | not DE   | not DE  |
| EVM0023634 | LG13 | Farnesylated protein-converti  | not DE   | not DE   | not DE   | not DE  |
| EVM0017270 | LG13 | Ferretin 1 isoform 1           | not DE   | not DE   | not DE   | not DE  |
| EVM0015230 | LG13 | GA-stimulated transcript-like  | not DE   | not DE   | 1.95105  | #####   |
| EVM0012481 | LG13 | GRAS family transcription fac  | not DE   | not DE   | not DE   | not DE  |
| EVM0008758 | LG13 | GRAS family transcription fac  | 3.005678 | 0.026297 | not DE   | not DE  |

|            |      |                               |          |          |          |         |
|------------|------|-------------------------------|----------|----------|----------|---------|
| EVM0012976 | LG13 | Gibberellin receptor GID1, pu | not DE   | not DE   | not DE   | not DE  |
| EVM0020569 | LG13 | Glucose-1-phosphate adenylylt | not DE   | not DE   | not DE   | not DE  |
| EVM0023344 | LG13 | Glutamine dumper 2, putative  | not DE   | not DE   | not DE   | not DE  |
| EVM0011157 | LG13 | Glycerol-3-phosphate acyltran | not DE   | not DE   | not DE   | not DE  |
| EVM0005213 | LG13 | HVA22-like protein J, putativ | not DE   | not DE   | not DE   | not DE  |
| EVM0020037 | LG13 | Harpin-induced 1, putative    | not DE   | not DE   | not DE   | not DE  |
| EVM0014754 | LG13 | Heat shock cognate 70 kDa pro | -2.02108 | 0.000385 | -1.25681 | 0.00771 |
| EVM0001142 | LG13 | Histone superfamily protein   | -1.84178 | 0.000151 | not DE   | not DE  |
| EVM0019958 | LG13 | Homeobox prospero             | not DE   | not DE   | not DE   | not DE  |
| EVM0018635 | LG13 | Hydroxyproline-rich glycoprot | not DE   | not DE   | not DE   | not DE  |
| EVM0022821 | LG13 | Hydroxyproline-rich glycoprot | not DE   | not DE   | not DE   | not DE  |
| EVM0006758 | LG13 | Inositol phosphorylceramide s | not DE   | not DE   | not DE   | not DE  |
| EVM0009170 | LG13 | Kinase superfamily protein    | not DE   | not DE   | not DE   | not DE  |
| EVM0003144 | LG13 | Kinase superfamily protein is | not DE   | not DE   | not DE   | not DE  |
| EVM0004073 | LG13 | LRR receptor-like serine/thre | not DE   | not DE   | not DE   | not DE  |
| EVM0018791 | LG13 | LRR receptor-like serine/thre | not DE   | not DE   | not DE   | not DE  |
| EVM0021169 | LG13 | LURP-one-related 1, putative  | not DE   | not DE   | not DE   | not DE  |
| EVM0004897 | LG13 | Late embryogenesis abundant p | not DE   | not DE   | not DE   | not DE  |
| EVM0005478 | LG13 | Leucine-rich repeat protein k | not DE   | not DE   | not DE   | not DE  |
| EVM0001471 | LG13 | Leucine-rich repeat protein k | not DE   | not DE   | not DE   | not DE  |
| EVM0008550 | LG13 | Lysine decarboxylase family p | not DE   | not DE   | not DE   | not DE  |
| EVM0019688 | LG13 | Malectin/receptor-like protei | not DE   | not DE   | not DE   | not DE  |
| EVM0010750 | LG13 | Mannan endo-1,4-beta-mannosid | not DE   | not DE   | not DE   | not DE  |
| EVM0006290 | LG13 | Matrixin family protein       | not DE   | not DE   | not DE   | not DE  |
| EVM0011216 | LG13 | Matrixin family protein       | not DE   | not DE   | not DE   | not DE  |
| EVM0023118 | LG13 | Methyltransferase-like protei | not DE   | not DE   | not DE   | not DE  |
| EVM0011804 | LG13 | Mini zinc finger 2 isoform 2, | not DE   | not DE   | not DE   | not DE  |
| EVM0024162 | LG13 | Mini zinc finger 2 isoform 2, | not DE   | not DE   | not DE   | not DE  |
| EVM0010235 | LG13 | Monodehydroascorbate reductas | not DE   | not DE   | not DE   | not DE  |
| EVM0022378 | LG13 | Myb domain protein 105, putat | not DE   | not DE   | not DE   | not DE  |
| EVM0020610 | LG13 | NAC domain containing protein | not DE   | not DE   | not DE   | not DE  |
| EVM0012218 | LG13 | NAC domain protein, IPR003441 | not DE   | not DE   | not DE   | not DE  |
| EVM0013393 | LG13 | NAD(P)-binding Rossmann-fold  | not DE   | not DE   | not DE   | not DE  |
| EVM0009146 | LG13 | Non-intrinsic ABC protein 9   | not DE   | not DE   | 1.031134 | 0.00046 |
| EVM0018099 | LG13 | Non-intrinsic ABC protein 9   | not DE   | not DE   | not DE   | not DE  |
| EVM0004503 | LG13 | Non-specific lipid-transfer   | not DE   | not DE   | 1.583897 | 0.00443 |
| EVM0021107 | LG13 | Nuclear shuttle interacting i | not DE   | not DE   | not DE   | not DE  |
| EVM0013060 | LG13 | Nucleotide-diphospho-sugar tr | not DE   | not DE   | not DE   | not DE  |
| EVM0020514 | LG13 | Nucleotide-sugar transporter  | -3.69288 | 0.044452 | not DE   | not DE  |
| EVM0022768 | LG13 | Ovate family protein 13, puta | not DE   | not DE   | not DE   | not DE  |
| EVM0005848 | LG13 | Oxysterol-binding family prot | not DE   | not DE   | not DE   | not DE  |
| EVM0018127 | LG13 | Oxysterol-binding family prot | not DE   | not DE   | not DE   | not DE  |
| EVM0006451 | LG13 | P-loop containing nucleoside  | not DE   | not DE   | not DE   | not DE  |
| EVM0022067 | LG13 | PGPD14 isoform 1              | not DE   | not DE   | not DE   | not DE  |
| EVM0017772 | LG13 | PHD finger ALFIN-LIKE 1 -like | not DE   | not DE   | not DE   | not DE  |
| EVM0013670 | LG13 | Pentatricopeptide repeat (PPR | 2.520378 | 0.011724 | not DE   | not DE  |
| EVM0015733 | LG13 | Pentatricopeptide repeat (PPR | not DE   | not DE   | not DE   | not DE  |
| EVM0023645 | LG13 | Pentatricopeptide repeat (PPR | not DE   | not DE   | not DE   | not DE  |
| EVM0008334 | LG13 | Peroxidase 2                  | not DE   | not DE   | not DE   | not DE  |
| EVM0013284 | LG13 | Peroxidase superfamily protei | not DE   | not DE   | not DE   | not DE  |
| EVM0012762 | LG13 | Phototropic-responsive NPH3 f | not DE   | not DE   | not DE   | not DE  |
| EVM0011276 | LG13 | Phytosulfokine 3 precursor, p | not DE   | not DE   | not DE   | not DE  |
| EVM0010255 | LG13 | Plant adhesion molecule 1 isc | not DE   | not DE   | not DE   | not DE  |
| EVM0024062 | LG13 | Plastid transcription factor  | 1.066306 | 0.003305 | not DE   | not DE  |

|            |      |                                |          |          |          |         |
|------------|------|--------------------------------|----------|----------|----------|---------|
| EVM0004534 | LG13 | Polyadenylate-binding 2 -like  | not DE   | not DE   | not DE   | not DE  |
| EVM0018257 | LG13 | Polyubiquitin-A                | not DE   | not DE   | not DE   | not DE  |
| EVM0022010 | LG13 | Polyubiquitin-A                | not DE   | not DE   | not DE   | not DE  |
| EVM0002524 | LG13 | Promoter-binding protein SPL9  | not DE   | not DE   | not DE   | not DE  |
| EVM0017317 | LG13 | Protease degQ precursor, puta  | not DE   | not DE   | not DE   | not DE  |
| EVM0008239 | LG13 | Proteasome inhibitor-related   | not DE   | not DE   | not DE   | not DE  |
| EVM0007722 | LG13 | Protein FAM96B, putative       | not DE   | not DE   | not DE   | not DE  |
| EVM0002519 | LG13 | Protein pim1, putative         | not DE   | not DE   | not DE   | not DE  |
| EVM0021837 | LG13 | Putative mediator of RNA poly  | not DE   | not DE   | not DE   | not DE  |
| EVM0023420 | LG13 | Putative serine/threonine-pro  | not DE   | not DE   | not DE   | not DE  |
| EVM0007186 | LG13 | Putative xyloglucan endotrans  | not DE   | not DE   | not DE   | not DE  |
| EVM0012679 | LG13 | Pyrroline-5-carboxylate synth  | 2.913117 | 0.00067  | not DE   | not DE  |
| EVM0018346 | LG13 | RAB6-interacting golgin        | not DE   | not DE   | not DE   | not DE  |
| EVM0018652 | LG13 | RHO guanyl-nucleotide exchang  | not DE   | not DE   | not DE   | not DE  |
| EVM0006988 | LG13 | RHOMBOLD-like 1                | not DE   | not DE   | not DE   | not DE  |
| EVM0015570 | LG13 | RHOMBOLD-like 1                | not DE   | not DE   | not DE   | not DE  |
| EVM0016856 | LG13 | RHOMBOLD-like protein 15       | not DE   | not DE   | not DE   | not DE  |
| EVM0018537 | LG13 | RING-H2 finger protein ATL3C,  | not DE   | not DE   | not DE   | not DE  |
| EVM0021285 | LG13 | RING/U-box superfamily protei  | not DE   | not DE   | not DE   | not DE  |
| EVM0015539 | LG13 | RING/U-box superfamily protei  | 1.859601 | 0.026427 | not DE   | not DE  |
| EVM0001305 | LG13 | RING/U-box superfamily protei  | not DE   | not DE   | not DE   | not DE  |
| EVM0013563 | LG13 | RNA-binding KH domain-contain  | not DE   | not DE   | not DE   | not DE  |
| EVM0021474 | LG13 | RNA-binding KH domain-contain  | not DE   | not DE   | not DE   | not DE  |
| EVM0019996 | LG13 | RNA-binding family protein     | not DE   | not DE   | not DE   | not DE  |
| EVM0023709 | LG13 | RP non-ATPase subunit 8A       | not DE   | not DE   | not DE   | not DE  |
| EVM0010655 | LG13 | RecName: Full=S-adenosylmethi  | not DE   | not DE   | not DE   | not DE  |
| EVM0021865 | LG13 | Regulator of chromosome conde  | -3.01573 | 1.02E-06 | -1.89781 | 0.00117 |
| EVM0009615 | LG13 | Response to aba and salt 1, p  | not DE   | not DE   | not DE   | not DE  |
| EVM0005161 | LG13 | Ribulose biphosphate carboxy   | -1.71588 | 0.013866 | -2.68285 | #####   |
| EVM0017429 | LG13 | S-adenosyl-L-methionine-depen  | not DE   | not DE   | not DE   | not DE  |
| EVM0003161 | LG13 | S-adenosyl-L-methionine-depen  | not DE   | not DE   | not DE   | not DE  |
| EVM0008636 | LG13 | S-adenosylmethionine decarbox  | not DE   | not DE   | not DE   | not DE  |
| EVM0016960 | LG13 | SAC domain-containing protein  | not DE   | not DE   | not DE   | not DE  |
| EVM0015695 | LG13 | SAUR family protein            | not DE   | not DE   | not DE   | not DE  |
| EVM0022949 | LG13 | SAUR family protein            | not DE   | not DE   | not DE   | not DE  |
| EVM0008430 | LG13 | SAUR-like auxin-responsive pr  | not DE   | not DE   | not DE   | not DE  |
| EVM0021423 | LG13 | SAUR-like auxin-responsive pr  | not DE   | not DE   | not DE   | not DE  |
| EVM0009995 | LG13 | SCL domain class transcriptio  | not DE   | not DE   | not DE   | not DE  |
| EVM0019660 | LG13 | SP1L, putative                 | not DE   | not DE   | 1.026776 | 0.01555 |
| EVM0015822 | LG13 | SPFH/Band 7/PHB domain-contain | not DE   | not DE   | not DE   | not DE  |
| EVM0002515 | LG13 | SPX (SYG1/Pho81/XPR1) domain   | 2.363328 | 0.022025 | not DE   | not DE  |
| EVM0005372 | LG13 | Seven transmembrane MLO famil  | not DE   | not DE   | not DE   | not DE  |
| EVM0012865 | LG13 | Solute carrier family 25 memb  | not DE   | not DE   | not DE   | not DE  |
| EVM0014672 | LG13 | Spotted leaf protein, putativ  | not DE   | not DE   | not DE   | not DE  |
| EVM0012452 | LG13 | Syntaxin-121 protein           | not DE   | not DE   | not DE   | not DE  |
| EVM0000359 | LG13 | T25B24.5 protein, putative     | not DE   | not DE   | not DE   | not DE  |
| EVM0020860 | LG13 | T25B24.5 protein, putative     | not DE   | not DE   | not DE   | not DE  |
| EVM0019799 | LG13 | TFL1-1                         | not DE   | not DE   | not DE   | not DE  |
| EVM0020336 | LG13 | TFL1-1                         | not DE   | not DE   | not DE   | not DE  |
| EVM0007912 | LG13 | T070-3                         | not DE   | not DE   | not DE   | not DE  |
| EVM0022290 | LG13 | TTG1-like protein              | not DE   | not DE   | not DE   | not DE  |
| EVM0006715 | LG13 | Tetratricopeptide repeat-like  | not DE   | not DE   | not DE   | not DE  |
| EVM0013771 | LG13 | Thiamine pyrophosphate depend  | not DE   | not DE   | not DE   | not DE  |
| EVM0008686 | LG13 | Transcript elongation factor   | not DE   | not DE   | not DE   | not DE  |

|            |      |                                |          |          |          |         |
|------------|------|--------------------------------|----------|----------|----------|---------|
| EVM0012879 | LG13 | Transducin/WD40 repeat-like s  | not DE   | not DE   | not DE   | not DE  |
| EVM0011386 | LG13 | Transitional endoplasmic reti  | -1.13476 | 0.01755  | -1.44522 | #####   |
| EVM0012575 | LG13 | Transmembrane and coiled-coil  | not DE   | not DE   | not DE   | not DE  |
| EVM0011696 | LG13 | Tryptophan synthase beta type  | not DE   | not DE   | not DE   | not DE  |
| EVM0018294 | LG13 | Tryptophan synthase beta type  | not DE   | not DE   | not DE   | not DE  |
| EVM0019551 | LG13 | Type one serine/threonine pro  | not DE   | not DE   | not DE   | not DE  |
| EVM0008658 | LG13 | UDP-Glycosyltransferase super  | not DE   | not DE   | not DE   | not DE  |
| EVM0022781 | LG13 | UDP-Glycosyltransferase super  | not DE   | not DE   | not DE   | not DE  |
| EVM0008995 | LG13 | UDP-glucosyl transferase 73C6  | not DE   | not DE   | not DE   | not DE  |
| EVM0021989 | LG13 | UDP-glucosyl transferase 73C6  | not DE   | not DE   | not DE   | not DE  |
| EVM0024398 | LG13 | UDP-glucosyltransferase, puta  | -2.68349 | 0.002484 | not DE   | not DE  |
| EVM0002627 | LG13 | UDP-glucuronosyltransferase,   | not DE   | not DE   | not DE   | not DE  |
| EVM0010764 | LG13 | UNCOUPLING family protein      | not DE   | not DE   | not DE   | not DE  |
| EVM0010563 | LG13 | UbiA prenyltransferase family  | not DE   | not DE   | not DE   | not DE  |
| EVM0013596 | LG13 | Ubiquitin E2 variant 1D-4      | not DE   | not DE   | not DE   | not DE  |
| EVM0008517 | LG13 | Ubiquitin supergroup, Ribosoma | not DE   | not DE   | not DE   | not DE  |
| EVM0004636 | LG13 | Uncharacterized protein TCM_C  | not DE   | not DE   | not DE   | not DE  |
| EVM0008969 | LG13 | Uncharacterized protein TCM_C  | not DE   | not DE   | not DE   | not DE  |
| EVM0020729 | LG13 | Uncharacterized protein TCM_C  | not DE   | not DE   | not DE   | not DE  |
| EVM0013355 | LG13 | Uncharacterized protein TCM_C  | not DE   | not DE   | not DE   | not DE  |
| EVM0006745 | LG13 | Uncharacterized protein TCM_C  | -1.88058 | 0.000306 | not DE   | not DE  |
| EVM0011050 | LG13 | Uncharacterized protein TCM_C  | not DE   | not DE   | not DE   | not DE  |
| EVM0012149 | LG13 | Uncharacterized protein TCM_C  | not DE   | not DE   | not DE   | not DE  |
| EVM0018840 | LG13 | Uncharacterized protein TCM_C  | not DE   | not DE   | not DE   | not DE  |
| EVM0021214 | LG13 | Uncharacterized protein TCM_C  | not DE   | not DE   | not DE   | not DE  |
| EVM0017797 | LG13 | Uncharacterized protein TCM_C  | not DE   | not DE   | not DE   | not DE  |
| EVM0009984 | LG13 | Uncharacterized protein TCM_C  | not DE   | not DE   | -4.75659 | 0.00213 |
| EVM0014851 | LG13 | Uncharacterized protein TCM_C  | not DE   | not DE   | not DE   | not DE  |
| EVM0009033 | LG13 | Uncharacterized protein TCM_C  | not DE   | not DE   | not DE   | not DE  |
| EVM0018685 | LG13 | Uncharacterized protein TCM_C  | not DE   | not DE   | not DE   | not DE  |
| EVM0000774 | LG13 | Uncharacterized protein TCM_C  | -2.57857 | 0.021961 | not DE   | not DE  |
| EVM0015266 | LG13 | Uncharacterized protein TCM_C  | not DE   | not DE   | not DE   | not DE  |
| EVM0018803 | LG13 | Uncharacterized protein TCM_C  | not DE   | not DE   | not DE   | not DE  |
| EVM0006499 | LG13 | Uncharacterized protein TCM_C  | not DE   | not DE   | not DE   | not DE  |
| EVM0016315 | LG13 | Uncharacterized protein TCM_C  | not DE   | not DE   | not DE   | not DE  |
| EVM0020680 | LG13 | Uncharacterized protein TCM_C  | not DE   | not DE   | not DE   | not DE  |
| EVM0011006 | LG13 | Uncharacterized protein TCM_C  | not DE   | not DE   | not DE   | not DE  |
| EVM0002387 | LG13 | Uncharacterized protein isofo  | not DE   | not DE   | not DE   | not DE  |
| EVM0005219 | LG13 | Uncharacterized protein isofo  | not DE   | not DE   | not DE   | not DE  |
| EVM0021638 | LG13 | Uridine-ribohydrolase 1 isofo  | not DE   | not DE   | not DE   | not DE  |
| EVM0011312 | LG13 | Voltage dependent anion chann  | not DE   | not DE   | not DE   | not DE  |
| EVM0017767 | LG13 | Voltage dependent anion chann  | not DE   | not DE   | not DE   | not DE  |
| EVM0004275 | LG13 | WCRKC thioredoxin 1 isoform 1  | 2.351814 | 0.019981 | 3.32394  | #####   |
| EVM0009496 | LG13 | WD-40 repeat family protein    | not DE   | not DE   | not DE   | not DE  |
| EVM0022427 | LG13 | WRKY transcription factor 17   | not DE   | not DE   | not DE   | not DE  |
| EVM0009650 | LG13 | WRKY transcription factor 72-  | not DE   | not DE   | not DE   | not DE  |
| EVM0016348 | LG13 | Yippee family zinc-binding pr  | not DE   | not DE   | 1.603206 | 0.00311 |
| EVM0013387 | LG13 | Zinc-finger protein 10, putat  | not DE   | not DE   | not DE   | not DE  |
| EVM0013516 | LG13 | abscisic acid &apos;-hydroxy   | not DE   | not DE   | not DE   | not DE  |
| EVM0013846 | LG13 | actin-depolymerizing factor 3  | not DE   | not DE   | not DE   | not DE  |
| EVM0007026 | LG13 | alanine-glyoxylate aminotrans  | 1.241454 | 0.039211 | not DE   | not DE  |
| EVM0003958 | LG13 | alcohol dehydroge family prot  | 2.970574 | 0.004565 | not DE   | not DE  |
| EVM0016150 | LG13 | auxin response factor          | not DE   | not DE   | not DE   | not DE  |
| EVM0022032 | LG13 | auxin:hydrogen symporter, put  | 1.659044 | 0.040708 | not DE   | not DE  |

|            |      |                                |          |          |          |         |
|------------|------|--------------------------------|----------|----------|----------|---------|
| EVM0013594 | LG13 | beta-tubulin                   | not DE   | not DE   | not DE   | not DE  |
| EVM0006301 | LG13 | calcium binding protein/cast,  | not DE   | not DE   | not DE   | not DE  |
| EVM0023834 | LG13 | carbon catabolite repressor p  | not DE   | not DE   | not DE   | not DE  |
| EVM0020309 | LG13 | carboxylic ester hydrolase, p  | not DE   | not DE   | not DE   | not DE  |
| EVM0006185 | LG13 | chloroplast chlorophyll A/B b  | -1.79164 | 8.68E-05 | not DE   | not DE  |
| EVM0017119 | LG13 | chloroplast-targeted copper c  | not DE   | not DE   | not DE   | not DE  |
| EVM0003107 | LG13 | conserved hypothetical protei  | not DE   | not DE   | not DE   | not DE  |
| EVM0005322 | LG13 | conserved hypothetical protei  | not DE   | not DE   | not DE   | not DE  |
| EVM0012868 | LG13 | conserved hypothetical protei  | not DE   | not DE   | not DE   | not DE  |
| EVM0015111 | LG13 | conserved hypothetical protei  | not DE   | not DE   | not DE   | not DE  |
| EVM0016022 | LG13 | conserved hypothetical protei  | -2.3541  | 0.043722 | not DE   | not DE  |
| EVM0017349 | LG13 | conserved hypothetical protei  | not DE   | not DE   | 1.260773 | 0.00343 |
| EVM0018168 | LG13 | conserved hypothetical protei  | 1.185489 | 0.005265 | not DE   | not DE  |
| EVM0022357 | LG13 | conserved hypothetical protei  | not DE   | not DE   | not DE   | not DE  |
| EVM0023518 | LG13 | conserved hypothetical protei  | not DE   | not DE   | not DE   | not DE  |
| EVM0020269 | LG13 | copia LTR rider                | not DE   | not DE   | not DE   | not DE  |
| EVM0012254 | LG13 | cytochrome P450, putative      | not DE   | not DE   | not DE   | not DE  |
| EVM0006194 | LG13 | cytochrome b6 (chloroplast)    | -1.72353 | 7.20E-07 | not DE   | not DE  |
| EVM0002009 | LG13 | cytochrome b6-f complex subun  | -1.70678 | 8.68E-05 | not DE   | not DE  |
| EVM0007678 | LG13 | cytochrome c oxidase subunit   | not DE   | not DE   | not DE   | not DE  |
| EVM0003665 | LG13 | cytokinin riboside 5&apos;-mo  | not DE   | not DE   | not DE   | not DE  |
| EVM0022009 | LG13 | cytosolic ascorbate peroxidase | -1.62962 | 0.028302 | not DE   | not DE  |
| EVM0001976 | LG13 | expansin                       | not DE   | not DE   | not DE   | not DE  |
| EVM0005654 | LG13 | expansin                       | not DE   | not DE   | not DE   | not DE  |
| EVM0014028 | LG13 | ferritin, plant, putative      | not DE   | not DE   | not DE   | not DE  |
| EVM0012060 | LG13 | fruitful 1                     | not DE   | not DE   | not DE   | not DE  |
| EVM0015759 | LG13 | heat shock protein binding pr  | not DE   | not DE   | not DE   | not DE  |
| EVM0014585 | LG13 | homeobox protein, putative     | not DE   | not DE   | not DE   | not DE  |
| EVM0020278 | LG13 | hypothetical protein AALP_AA   | not DE   | not DE   | not DE   | not DE  |
| EVM0006550 | LG13 | hypothetical protein AMTR_s05  | not DE   | not DE   | not DE   | not DE  |
| EVM0007116 | LG13 | hypothetical protein CARUB_vl  | not DE   | not DE   | -3.63705 | 0.00163 |
| EVM0015349 | LG13 | hypothetical protein CARUB_vl  | not DE   | not DE   | not DE   | not DE  |
| EVM0013379 | LG13 | hypothetical protein CICLE_vl  | not DE   | not DE   | not DE   | not DE  |
| EVM0009418 | LG13 | hypothetical protein CICLE_vl  | not DE   | not DE   | not DE   | not DE  |
| EVM0015153 | LG13 | hypothetical protein CICLE_vl  | not DE   | not DE   | not DE   | not DE  |
| EVM0000439 | LG13 | hypothetical protein CICLE_vl  | not DE   | not DE   | not DE   | not DE  |
| EVM0019382 | LG13 | hypothetical protein CICLE_vl  | not DE   | not DE   | not DE   | not DE  |
| EVM0003729 | LG13 | hypothetical protein CICLE_vl  | not DE   | not DE   | not DE   | not DE  |
| EVM0004883 | LG13 | hypothetical protein CICLE_vl  | not DE   | not DE   | not DE   | not DE  |
| EVM0010231 | LG13 | hypothetical protein CICLE_vl  | not DE   | not DE   | not DE   | not DE  |
| EVM0019413 | LG13 | hypothetical protein CICLE_vl  | not DE   | not DE   | not DE   | not DE  |
| EVM0021804 | LG13 | hypothetical protein CICLE_vl  | not DE   | not DE   | not DE   | not DE  |
| EVM0011873 | LG13 | hypothetical protein CICLE_vl  | not DE   | not DE   | not DE   | not DE  |
| EVM0003224 | LG13 | hypothetical protein CICLE_vl  | not DE   | not DE   | -1.02443 | #####   |
| EVM0012359 | LG13 | hypothetical protein CICLE_vl  | not DE   | not DE   | not DE   | not DE  |
| EVM0017877 | LG13 | hypothetical protein CICLE_vl  | -1.69278 | 0.002346 | -1.27055 | #####   |
| EVM0011897 | LG13 | hypothetical protein CICLE_vl  | not DE   | not DE   | -1.25426 | #####   |
| EVM0000570 | LG13 | hypothetical protein CICLE_vl  | not DE   | not DE   | not DE   | not DE  |
| EVM0019969 | LG13 | hypothetical protein CICLE_vl  | not DE   | not DE   | not DE   | not DE  |
| EVM0023675 | LG13 | hypothetical protein CICLE_vl  | not DE   | not DE   | not DE   | not DE  |
| EVM0011724 | LG13 | hypothetical protein CICLE_vl  | not DE   | not DE   | not DE   | not DE  |
| EVM0007934 | LG13 | hypothetical protein CICLE_vl  | not DE   | not DE   | not DE   | not DE  |
| EVM0007224 | LG13 | hypothetical protein CICLE_vl  | not DE   | not DE   | not DE   | not DE  |
| EVM0008613 | LG13 | hypothetical protein CICLE_vl  | not DE   | not DE   | not DE   | not DE  |

|            |      |                               |          |          |          |         |
|------------|------|-------------------------------|----------|----------|----------|---------|
| EVM0012329 | LG13 | hypothetical protein CICLE_v1 | -1.41891 | 0.001004 | not DE   | not DE  |
| EVM0013754 | LG13 | hypothetical protein CICLE_v1 | not DE   | not DE   | not DE   | not DE  |
| EVM0006167 | LG13 | hypothetical protein CICLE_v1 | not DE   | not DE   | not DE   | not DE  |
| EVM0022997 | LG13 | hypothetical protein CICLE_v1 | not DE   | not DE   | -1.38834 | 0.00102 |
| EVM0008105 | LG13 | hypothetical protein CICLE_v1 | not DE   | not DE   | not DE   | not DE  |
| EVM0005104 | LG13 | hypothetical protein CICLE_v1 | not DE   | not DE   | not DE   | not DE  |
| EVM0003624 | LG13 | hypothetical protein CICLE_v1 | not DE   | not DE   | -1.66286 | 0.01226 |
| EVM0021379 | LG13 | hypothetical protein CICLE_v1 | not DE   | not DE   | not DE   | not DE  |
| EVM0020965 | LG13 | hypothetical protein CICLE_v1 | not DE   | not DE   | not DE   | not DE  |
| EVM0021036 | LG13 | hypothetical protein CICLE_v1 | not DE   | not DE   | not DE   | not DE  |
| EVM0022106 | LG13 | hypothetical protein CICLE_v1 | not DE   | not DE   | not DE   | not DE  |
| EVM0003037 | LG13 | hypothetical protein CICLE_v1 | -1.36602 | 0.004528 | -1.7578  | #####   |
| EVM0018863 | LG13 | hypothetical protein CICLE_v1 | not DE   | not DE   | not DE   | not DE  |
| EVM0009976 | LG13 | hypothetical protein CICLE_v1 | 1.025812 | 0.004929 | not DE   | not DE  |
| EVM0010801 | LG13 | hypothetical protein CICLE_v1 | not DE   | not DE   | not DE   | not DE  |
| EVM0000469 | LG13 | hypothetical protein CICLE_v1 | 2.41103  | 0.031915 | not DE   | not DE  |
| EVM0010936 | LG13 | hypothetical protein CICLE_v1 | not DE   | not DE   | not DE   | not DE  |
| EVM0023108 | LG13 | hypothetical protein CICLE_v1 | not DE   | not DE   | not DE   | not DE  |
| EVM0023249 | LG13 | hypothetical protein CICLE_v1 | not DE   | not DE   | not DE   | not DE  |
| EVM0009564 | LG13 | hypothetical protein CICLE_v1 | not DE   | not DE   | not DE   | not DE  |
| EVM0004195 | LG13 | hypothetical protein CICLE_v1 | not DE   | not DE   | not DE   | not DE  |
| EVM0022561 | LG13 | hypothetical protein CICLE_v1 | not DE   | not DE   | not DE   | not DE  |
| EVM0006234 | LG13 | hypothetical protein CICLE_v1 | not DE   | not DE   | not DE   | not DE  |
| EVM0021706 | LG13 | hypothetical protein CICLE_v1 | not DE   | not DE   | 1.596183 | 0.00137 |
| EVM0018931 | LG13 | hypothetical protein CICLE_v1 | not DE   | not DE   | not DE   | not DE  |
| EVM0013756 | LG13 | hypothetical protein CICLE_v1 | not DE   | not DE   | not DE   | not DE  |
| EVM0013289 | LG13 | hypothetical protein CICLE_v1 | not DE   | not DE   | not DE   | not DE  |
| EVM0022563 | LG13 | hypothetical protein CICLE_v1 | not DE   | not DE   | not DE   | not DE  |
| EVM0006816 | LG13 | hypothetical protein CICLE_v1 | not DE   | not DE   | not DE   | not DE  |
| EVM0006834 | LG13 | hypothetical protein CICLE_v1 | not DE   | not DE   | not DE   | not DE  |
| EVM0021718 | LG13 | hypothetical protein CICLE_v1 | not DE   | not DE   | not DE   | not DE  |
| EVM0023411 | LG13 | hypothetical protein CICLE_v1 | not DE   | not DE   | not DE   | not DE  |
| EVM0009442 | LG13 | hypothetical protein CICLE_v1 | 1.222362 | 0.001485 | not DE   | not DE  |
| EVM0006232 | LG13 | hypothetical protein CICLE_v1 | not DE   | not DE   | not DE   | not DE  |
| EVM0019680 | LG13 | hypothetical protein CICLE_v1 | not DE   | not DE   | not DE   | not DE  |
| EVM0010853 | LG13 | hypothetical protein CICLE_v1 | not DE   | not DE   | not DE   | not DE  |
| EVM0017293 | LG13 | hypothetical protein CICLE_v1 | not DE   | not DE   | not DE   | not DE  |
| EVM0015948 | LG13 | hypothetical protein CICLE_v1 | not DE   | not DE   | not DE   | not DE  |
| EVM0013603 | LG13 | hypothetical protein CICLE_v1 | not DE   | not DE   | not DE   | not DE  |
| EVM0008854 | LG13 | hypothetical protein CICLE_v1 | not DE   | not DE   | not DE   | not DE  |
| EVM0022869 | LG13 | hypothetical protein CICLE_v1 | 1.460955 | 0.006514 | not DE   | not DE  |
| EVM0017815 | LG13 | hypothetical protein CICLE_v1 | 1.615112 | 0.011511 | not DE   | not DE  |
| EVM0007375 | LG13 | hypothetical protein CICLE_v1 | not DE   | not DE   | not DE   | not DE  |
| EVM0020462 | LG13 | hypothetical protein CICLE_v1 | not DE   | not DE   | not DE   | not DE  |
| EVM0006516 | LG13 | hypothetical protein CICLE_v1 | not DE   | not DE   | not DE   | not DE  |
| EVM0002403 | LG13 | hypothetical protein CICLE_v1 | 1.776365 | 1.97E-05 | not DE   | not DE  |
| EVM0021578 | LG13 | hypothetical protein CICLE_v1 | not DE   | not DE   | not DE   | not DE  |
| EVM0005547 | LG13 | hypothetical protein CICLE_v1 | not DE   | not DE   | not DE   | not DE  |
| EVM0020770 | LG13 | hypothetical protein CICLE_v1 | not DE   | not DE   | not DE   | not DE  |
| EVM0012523 | LG13 | hypothetical protein CICLE_v1 | not DE   | not DE   | not DE   | not DE  |
| EVM0022812 | LG13 | hypothetical protein CICLE_v1 | -1.06374 | 0.001463 | not DE   | not DE  |
| EVM0001508 | LG13 | hypothetical protein CICLE_v1 | not DE   | not DE   | not DE   | not DE  |
| EVM0019507 | LG13 | hypothetical protein CICLE_v1 | 1.046105 | 0.049516 | not DE   | not DE  |
| EVM0009820 | LG13 | hypothetical protein CICLE_v1 | not DE   | not DE   | not DE   | not DE  |



|            |      |                               |          |          |          |        |
|------------|------|-------------------------------|----------|----------|----------|--------|
| EVM0010411 | LG13 | hypothetical protein CICLE_v1 | not DE   | not DE   | not DE   | not DE |
| EVM0011941 | LG13 | hypothetical protein CICLE_v1 | not DE   | not DE   | not DE   | not DE |
| EVM0008196 | LG13 | hypothetical protein CICLE_v1 | not DE   | not DE   | not DE   | not DE |
| EVM0005830 | LG13 | hypothetical protein CICLE_v1 | not DE   | not DE   | not DE   | not DE |
| EVM0023963 | LG13 | hypothetical protein CICLE_v1 | not DE   | not DE   | not DE   | not DE |
| EVM0013615 | LG13 | hypothetical protein CICLE_v1 | not DE   | not DE   | not DE   | not DE |
| EVM0014157 | LG13 | hypothetical protein CICLE_v1 | not DE   | not DE   | not DE   | not DE |
| EVM0011472 | LG13 | hypothetical protein CICLE_v1 | not DE   | not DE   | not DE   | not DE |
| EVM0009377 | LG13 | hypothetical protein CICLE_v1 | not DE   | not DE   | not DE   | not DE |
| EVM0010787 | LG13 | hypothetical protein CICLE_v1 | not DE   | not DE   | not DE   | not DE |
| EVM0016465 | LG13 | hypothetical protein CICLE_v1 | not DE   | not DE   | not DE   | not DE |
| EVM0018529 | LG13 | hypothetical protein CICLE_v1 | -1.31457 | 0.000309 | not DE   | not DE |
| EVM0018743 | LG13 | hypothetical protein CICLE_v1 | -2.50142 | 5.19E-06 | -2.38006 | #####  |
| EVM0004854 | LG13 | hypothetical protein CICLE_v1 | not DE   | not DE   | not DE   | not DE |
| EVM0009324 | LG13 | hypothetical protein CICLE_v1 | not DE   | not DE   | not DE   | not DE |
| EVM0010049 | LG13 | hypothetical protein CICLE_v1 | not DE   | not DE   | not DE   | not DE |
| EVM0015365 | LG13 | hypothetical protein CICLE_v1 | not DE   | not DE   | not DE   | not DE |
| EVM0002133 | LG13 | hypothetical protein CICLE_v1 | not DE   | not DE   | not DE   | not DE |
| EVM0023783 | LG13 | hypothetical protein CICLE_v1 | not DE   | not DE   | not DE   | not DE |
| EVM0023001 | LG13 | hypothetical protein CICLE_v1 | 1.221857 | 0.012049 | not DE   | not DE |
| EVM0011913 | LG13 | hypothetical protein CICLE_v1 | not DE   | not DE   | not DE   | not DE |
| EVM0009073 | LG13 | hypothetical protein CICLE_v1 | not DE   | not DE   | not DE   | not DE |
| EVM0010457 | LG13 | hypothetical protein CICLE_v1 | not DE   | not DE   | not DE   | not DE |
| EVM0002723 | LG13 | hypothetical protein CICLE_v1 | not DE   | not DE   | not DE   | not DE |
| EVM0006359 | LG13 | hypothetical protein CICLE_v1 | not DE   | not DE   | not DE   | not DE |
| EVM0022684 | LG13 | hypothetical protein CICLE_v1 | not DE   | not DE   | not DE   | not DE |
| EVM0004653 | LG13 | hypothetical protein CICLE_v1 | not DE   | not DE   | not DE   | not DE |
| EVM0005133 | LG13 | hypothetical protein CICLE_v1 | not DE   | not DE   | not DE   | not DE |
| EVM0021777 | LG13 | hypothetical protein CICLE_v1 | not DE   | not DE   | not DE   | not DE |
| EVM0015941 | LG13 | hypothetical protein CICLE_v1 | not DE   | not DE   | not DE   | not DE |
| EVM0009172 | LG13 | hypothetical protein CICLE_v1 | not DE   | not DE   | not DE   | not DE |
| EVM0002935 | LG13 | hypothetical protein CICLE_v1 | not DE   | not DE   | not DE   | not DE |
| EVM0023541 | LG13 | hypothetical protein CICLE_v1 | not DE   | not DE   | not DE   | not DE |
| EVM0009819 | LG13 | hypothetical protein CICLE_v1 | not DE   | not DE   | not DE   | not DE |
| EVM0021010 | LG13 | hypothetical protein CICLE_v1 | not DE   | not DE   | not DE   | not DE |
| EVM0016754 | LG13 | hypothetical protein CICLE_v1 | not DE   | not DE   | not DE   | not DE |
| EVM0016461 | LG13 | hypothetical protein CICLE_v1 | not DE   | not DE   | not DE   | not DE |
| EVM0024649 | LG13 | hypothetical protein CICLE_v1 | not DE   | not DE   | not DE   | not DE |
| EVM0014707 | LG13 | hypothetical protein CICLE_v1 | not DE   | not DE   | not DE   | not DE |
| EVM0023886 | LG13 | hypothetical protein CICLE_v1 | 1.368742 | 0.001464 | not DE   | not DE |
| EVM0009945 | LG13 | hypothetical protein CICLE_v1 | not DE   | not DE   | not DE   | not DE |
| EVM0017493 | LG13 | hypothetical protein CICLE_v1 | not DE   | not DE   | not DE   | not DE |
| EVM0017992 | LG13 | hypothetical protein CICLE_v1 | not DE   | not DE   | not DE   | not DE |
| EVM0013091 | LG13 | hypothetical protein CICLE_v1 | not DE   | not DE   | not DE   | not DE |
| EVM0014717 | LG13 | hypothetical protein CICLE_v1 | not DE   | not DE   | not DE   | not DE |
| EVM0011389 | LG13 | hypothetical protein CICLE_v1 | not DE   | not DE   | not DE   | not DE |
| EVM0012491 | LG13 | hypothetical protein CICLE_v1 | not DE   | not DE   | not DE   | not DE |
| EVM0009470 | LG13 | hypothetical protein CICLE_v1 | -1.34317 | 6.87E-05 | not DE   | not DE |
| EVM0003694 | LG13 | hypothetical protein CICLE_v1 | not DE   | not DE   | not DE   | not DE |
| EVM0017522 | LG13 | hypothetical protein CICLE_v1 | not DE   | not DE   | not DE   | not DE |
| EVM0013145 | LG13 | hypothetical protein CICLE_v1 | not DE   | not DE   | not DE   | not DE |
| EVM0020613 | LG13 | hypothetical protein CICLE_v1 | not DE   | not DE   | not DE   | not DE |
| EVM0013250 | LG13 | hypothetical protein CICLE_v1 | not DE   | not DE   | not DE   | not DE |
| EVM0022500 | LG13 | hypothetical protein CICLE_v1 | not DE   | not DE   | not DE   | not DE |

|            |      |                               |          |          |        |         |
|------------|------|-------------------------------|----------|----------|--------|---------|
| EVM0018630 | LG13 | hypothetical protein CICLE_v1 | not DE   | not DE   | not DE | not DE  |
| EVM0009389 | LG13 | hypothetical protein CICLE_v1 | not DE   | not DE   | not DE | not DE  |
| EVM0003208 | LG13 | hypothetical protein CICLE_v1 | not DE   | not DE   | not DE | not DE  |
| EVM0001656 | LG13 | hypothetical protein CICLE_v1 | not DE   | not DE   | not DE | not DE  |
| EVM0002654 | LG13 | hypothetical protein CICLE_v1 | not DE   | not DE   | not DE | not DE  |
| EVM0011585 | LG13 | hypothetical protein CICLE_v1 | not DE   | not DE   | not DE | not DE  |
| EVM0015378 | LG13 | hypothetical protein CICLE_v1 | not DE   | not DE   | not DE | not DE  |
| EVM0022049 | LG13 | hypothetical protein CICLE_v1 | not DE   | not DE   | not DE | not DE  |
| EVM0000533 | LG13 | hypothetical protein CICLE_v1 | not DE   | not DE   | not DE | not DE  |
| EVM0008374 | LG13 | hypothetical protein CICLE_v1 | not DE   | not DE   | not DE | not DE  |
| EVM0012613 | LG13 | hypothetical protein CICLE_v1 | not DE   | not DE   | not DE | not DE  |
| EVM0022606 | LG13 | hypothetical protein CICLE_v1 | not DE   | not DE   | not DE | not DE  |
| EVM0007440 | LG13 | hypothetical protein CICLE_v1 | not DE   | not DE   | not DE | not DE  |
| EVM0011453 | LG13 | hypothetical protein CICLE_v1 | not DE   | not DE   | not DE | not DE  |
| EVM0007637 | LG13 | hypothetical protein CICLE_v1 | not DE   | not DE   | not DE | not DE  |
| EVM0017415 | LG13 | hypothetical protein CICLE_v1 | not DE   | not DE   | not DE | not DE  |
| EVM0023616 | LG13 | hypothetical protein CICLE_v1 | 1.535191 | 0.00325  | not DE | not DE  |
| EVM0012611 | LG13 | hypothetical protein CICLE_v1 | not DE   | not DE   | not DE | not DE  |
| EVM0012944 | LG13 | hypothetical protein CICLE_v1 | not DE   | not DE   | not DE | not DE  |
| EVM0016808 | LG13 | hypothetical protein CICLE_v1 | not DE   | not DE   | not DE | not DE  |
| EVM0010251 | LG13 | hypothetical protein CICLE_v1 | not DE   | not DE   | not DE | not DE  |
| EVM0024090 | LG13 | hypothetical protein CICLE_v1 | not DE   | not DE   | not DE | not DE  |
| EVM0007876 | LG13 | hypothetical protein CICLE_v1 | not DE   | not DE   | not DE | not DE  |
| EVM0014464 | LG13 | hypothetical protein CICLE_v1 | not DE   | not DE   | not DE | not DE  |
| EVM0016358 | LG13 | hypothetical protein CICLE_v1 | not DE   | not DE   | not DE | not DE  |
| EVM0005852 | LG13 | hypothetical protein CICLE_v1 | not DE   | not DE   | not DE | not DE  |
| EVM0013327 | LG13 | hypothetical protein CICLE_v1 | not DE   | not DE   | not DE | not DE  |
| EVM0011127 | LG13 | hypothetical protein CICLE_v1 | not DE   | not DE   | -2.312 | 0.00891 |
| EVM0014540 | LG13 | hypothetical protein CICLE_v1 | not DE   | not DE   | not DE | not DE  |
| EVM0021232 | LG13 | hypothetical protein CICLE_v1 | not DE   | not DE   | not DE | not DE  |
| EVM0008321 | LG13 | hypothetical protein CICLE_v1 | not DE   | not DE   | not DE | not DE  |
| EVM0014487 | LG13 | hypothetical protein CICLE_v1 | -1.27224 | 0.023678 | not DE | not DE  |
| EVM0023225 | LG13 | hypothetical protein CICLE_v1 | 1.371056 | 0.036692 | not DE | not DE  |
| EVM0000910 | LG13 | hypothetical protein CICLE_v1 | not DE   | not DE   | not DE | not DE  |
| EVM0000684 | LG13 | hypothetical protein CICLE_v1 | not DE   | not DE   | not DE | not DE  |
| EVM0015338 | LG13 | hypothetical protein CICLE_v1 | not DE   | not DE   | not DE | not DE  |
| EVM0012006 | LG13 | hypothetical protein CICLE_v1 | not DE   | not DE   | not DE | not DE  |
| EVM0015844 | LG13 | hypothetical protein CICLE_v1 | -1.31794 | 0.022748 | not DE | not DE  |
| EVM0011679 | LG13 | hypothetical protein CICLE_v1 | not DE   | not DE   | not DE | not DE  |
| EVM0021330 | LG13 | hypothetical protein CICLE_v1 | not DE   | not DE   | not DE | not DE  |
| EVM0003067 | LG13 | hypothetical protein CICLE_v1 | not DE   | not DE   | not DE | not DE  |
| EVM0018719 | LG13 | hypothetical protein CICLE_v1 | not DE   | not DE   | not DE | not DE  |
| EVM0024573 | LG13 | hypothetical protein CICLE_v1 | not DE   | not DE   | not DE | not DE  |
| EVM0023483 | LG13 | hypothetical protein CICLE_v1 | 1.283543 | 0.010142 | not DE | not DE  |
| EVM0016804 | LG13 | hypothetical protein CICLE_v1 | not DE   | not DE   | not DE | not DE  |
| EVM0021983 | LG13 | hypothetical protein CICLE_v1 | not DE   | not DE   | not DE | not DE  |
| EVM0010241 | LG13 | hypothetical protein CICLE_v1 | not DE   | not DE   | not DE | not DE  |
| EVM0005656 | LG13 | hypothetical protein CICLE_v1 | not DE   | not DE   | not DE | not DE  |
| EVM0002921 | LG13 | hypothetical protein CICLE_v1 | not DE   | not DE   | not DE | not DE  |
| EVM0004049 | LG13 | hypothetical protein CICLE_v1 | not DE   | not DE   | not DE | not DE  |
| EVM0009095 | LG13 | hypothetical protein CICLE_v1 | not DE   | not DE   | not DE | not DE  |
| EVM0012939 | LG13 | hypothetical protein CICLE_v1 | not DE   | not DE   | not DE | not DE  |
| EVM0007814 | LG13 | hypothetical protein CICLE_v1 | not DE   | not DE   | not DE | not DE  |
| EVM0010498 | LG13 | hypothetical protein CICLE_v1 | not DE   | not DE   | not DE | not DE  |

|            |      |                               |          |          |        |        |
|------------|------|-------------------------------|----------|----------|--------|--------|
| EVM0004291 | LG13 | hypothetical protein CICLE_v1 | not DE   | not DE   | not DE | not DE |
| EVM0018202 | LG13 | hypothetical protein CICLE_v1 | not DE   | not DE   | not DE | not DE |
| EVM0019008 | LG13 | hypothetical protein CICLE_v1 | not DE   | not DE   | not DE | not DE |
| EVM0014988 | LG13 | hypothetical protein CICLE_v1 | not DE   | not DE   | not DE | not DE |
| EVM0003632 | LG13 | hypothetical protein CICLE_v1 | not DE   | not DE   | not DE | not DE |
| EVM0012179 | LG13 | hypothetical protein CICLE_v1 | not DE   | not DE   | not DE | not DE |
| EVM0011632 | LG13 | hypothetical protein CICLE_v1 | not DE   | not DE   | not DE | not DE |
| EVM0017029 | LG13 | hypothetical protein CICLE_v1 | not DE   | not DE   | not DE | not DE |
| EVM0018454 | LG13 | hypothetical protein CICLE_v1 | not DE   | not DE   | not DE | not DE |
| EVM0013723 | LG13 | hypothetical protein CICLE_v1 | not DE   | not DE   | not DE | not DE |
| EVM0001108 | LG13 | hypothetical protein CICLE_v1 | not DE   | not DE   | not DE | not DE |
| EVM0016456 | LG13 | hypothetical protein CICLE_v1 | not DE   | not DE   | not DE | not DE |
| EVM0000770 | LG13 | hypothetical protein CICLE_v1 | not DE   | not DE   | not DE | not DE |
| EVM0011728 | LG13 | hypothetical protein CICLE_v1 | not DE   | not DE   | not DE | not DE |
| EVM0016904 | LG13 | hypothetical protein CICLE_v1 | not DE   | not DE   | not DE | not DE |
| EVM0005660 | LG13 | hypothetical protein CICLE_v1 | not DE   | not DE   | not DE | not DE |
| EVM0012558 | LG13 | hypothetical protein CICLE_v1 | not DE   | not DE   | not DE | not DE |
| EVM0009455 | LG13 | hypothetical protein CICLE_v1 | not DE   | not DE   | not DE | not DE |
| EVM0019191 | LG13 | hypothetical protein CICLE_v1 | -4.5701  | 0.000308 | not DE | not DE |
| EVM0023810 | LG13 | hypothetical protein CICLE_v1 | not DE   | not DE   | not DE | not DE |
| EVM0008287 | LG13 | hypothetical protein CICLE_v1 | not DE   | not DE   | not DE | not DE |
| EVM0002280 | LG13 | hypothetical protein CICLE_v1 | not DE   | not DE   | not DE | not DE |
| EVM0007090 | LG13 | hypothetical protein CICLE_v1 | not DE   | not DE   | not DE | not DE |
| EVM0015654 | LG13 | hypothetical protein CICLE_v1 | not DE   | not DE   | not DE | not DE |
| EVM0000104 | LG13 | hypothetical protein CICLE_v1 | not DE   | not DE   | not DE | not DE |
| EVM0017171 | LG13 | hypothetical protein CICLE_v1 | not DE   | not DE   | not DE | not DE |
| EVM0017744 | LG13 | hypothetical protein CICLE_v1 | not DE   | not DE   | not DE | not DE |
| EVM0019186 | LG13 | hypothetical protein CICLE_v1 | not DE   | not DE   | not DE | not DE |
| EVM0024272 | LG13 | hypothetical protein CICLE_v1 | not DE   | not DE   | not DE | not DE |
| EVM0023552 | LG13 | hypothetical protein CICLE_v1 | not DE   | not DE   | not DE | not DE |
| EVM0006296 | LG13 | hypothetical protein CICLE_v1 | not DE   | not DE   | not DE | not DE |
| EVM0003218 | LG13 | hypothetical protein CICLE_v1 | not DE   | not DE   | not DE | not DE |
| EVM0015201 | LG13 | hypothetical protein CICLE_v1 | not DE   | not DE   | not DE | not DE |
| EVM0014497 | LG13 | hypothetical protein CICLE_v1 | not DE   | not DE   | not DE | not DE |
| EVM0016719 | LG13 | hypothetical protein CICLE_v1 | not DE   | not DE   | not DE | not DE |
| EVM0011243 | LG13 | hypothetical protein CICLE_v1 | 4.858609 | 0.004253 | not DE | not DE |
| EVM0003557 | LG13 | hypothetical protein CICLE_v1 | not DE   | not DE   | not DE | not DE |
| EVM0005704 | LG13 | hypothetical protein CICLE_v1 | not DE   | not DE   | not DE | not DE |
| EVM0002313 | LG13 | hypothetical protein CICLE_v1 | not DE   | not DE   | not DE | not DE |
| EVM0018279 | LG13 | hypothetical protein CICLE_v1 | not DE   | not DE   | not DE | not DE |
| EVM0021733 | LG13 | hypothetical protein CICLE_v1 | 3.339979 | 8.09E-06 | not DE | not DE |
| EVM0007277 | LG13 | hypothetical protein CICLE_v1 | not DE   | not DE   | not DE | not DE |
| EVM0016985 | LG13 | hypothetical protein CICLE_v1 | not DE   | not DE   | not DE | not DE |
| EVM0016482 | LG13 | hypothetical protein CICLE_v1 | not DE   | not DE   | not DE | not DE |
| EVM0004156 | LG13 | hypothetical protein CICLE_v1 | not DE   | not DE   | not DE | not DE |
| EVM0011360 | LG13 | hypothetical protein CICLE_v1 | not DE   | not DE   | not DE | not DE |
| EVM0004343 | LG13 | hypothetical protein CICLE_v1 | not DE   | not DE   | not DE | not DE |
| EVM0017898 | LG13 | hypothetical protein CICLE_v1 | not DE   | not DE   | not DE | not DE |
| EVM0021356 | LG13 | hypothetical protein CICLE_v1 | not DE   | not DE   | not DE | not DE |
| EVM0008038 | LG13 | hypothetical protein CICLE_v1 | not DE   | not DE   | not DE | not DE |
| EVM0012581 | LG13 | hypothetical protein CICLE_v1 | not DE   | not DE   | not DE | not DE |
| EVM0018940 | LG13 | hypothetical protein CICLE_v1 | not DE   | not DE   | not DE | not DE |
| EVM0014449 | LG13 | hypothetical protein CICLE_v1 | not DE   | not DE   | not DE | not DE |
| EVM0001114 | LG13 | hypothetical protein CICLE_v1 | not DE   | not DE   | not DE | not DE |

|            |      |                               |          |          |          |         |
|------------|------|-------------------------------|----------|----------|----------|---------|
| EVM0012200 | LG13 | hypothetical protein CICLE_v1 | not DE   | not DE   | not DE   | not DE  |
| EVM0013530 | LG13 | hypothetical protein CICLE_v1 | not DE   | not DE   | not DE   | not DE  |
| EVM0015994 | LG13 | hypothetical protein CICLE_v1 | -1.06197 | 0.005805 | not DE   | not DE  |
| EVM0001646 | LG13 | hypothetical protein CICLE_v1 | not DE   | not DE   | not DE   | not DE  |
| EVM0006726 | LG13 | hypothetical protein CICLE_v1 | not DE   | not DE   | not DE   | not DE  |
| EVM0012839 | LG13 | hypothetical protein CICLE_v1 | not DE   | not DE   | not DE   | not DE  |
| EVM0017225 | LG13 | hypothetical protein CICLE_v1 | not DE   | not DE   | not DE   | not DE  |
| EVM0000152 | LG13 | hypothetical protein CICLE_v1 | not DE   | not DE   | not DE   | not DE  |
| EVM0006552 | LG13 | hypothetical protein CICLE_v1 | -1.37227 | 0.023003 | not DE   | not DE  |
| EVM0021028 | LG13 | hypothetical protein CICLE_v1 | not DE   | not DE   | not DE   | not DE  |
| EVM0005294 | LG13 | hypothetical protein CICLE_v1 | not DE   | not DE   | not DE   | not DE  |
| EVM0006146 | LG13 | hypothetical protein CICLE_v1 | not DE   | not DE   | not DE   | not DE  |
| EVM0021101 | LG13 | hypothetical protein CICLE_v1 | not DE   | not DE   | not DE   | not DE  |
| EVM0009045 | LG13 | hypothetical protein CICLE_v1 | not DE   | not DE   | not DE   | not DE  |
| EVM0002379 | LG13 | hypothetical protein CICLE_v1 | not DE   | not DE   | not DE   | not DE  |
| EVM0017479 | LG13 | hypothetical protein CICLE_v1 | not DE   | not DE   | not DE   | not DE  |
| EVM0011973 | LG13 | hypothetical protein CICLE_v1 | not DE   | not DE   | not DE   | not DE  |
| EVM0012217 | LG13 | hypothetical protein CICLE_v1 | not DE   | not DE   | not DE   | not DE  |
| EVM0012283 | LG13 | hypothetical protein CICLE_v1 | not DE   | not DE   | not DE   | not DE  |
| EVM0021400 | LG13 | hypothetical protein CICLE_v1 | not DE   | not DE   | not DE   | not DE  |
| EVM0021556 | LG13 | hypothetical protein CICLE_v1 | not DE   | not DE   | not DE   | not DE  |
| EVM0002840 | LG13 | hypothetical protein CICLE_v1 | not DE   | not DE   | not DE   | not DE  |
| EVM0019753 | LG13 | hypothetical protein CICLE_v1 | not DE   | not DE   | not DE   | not DE  |
| EVM0019797 | LG13 | hypothetical protein CICLE_v1 | not DE   | not DE   | not DE   | not DE  |
| EVM0008240 | LG13 | hypothetical protein CICLE_v1 | not DE   | not DE   | not DE   | not DE  |
| EVM0012570 | LG13 | hypothetical protein CICLE_v1 | not DE   | not DE   | not DE   | not DE  |
| EVM0023177 | LG13 | hypothetical protein CICLE_v1 | not DE   | not DE   | not DE   | not DE  |
| EVM0014257 | LG13 | hypothetical protein CICLE_v1 | not DE   | not DE   | not DE   | not DE  |
| EVM0015786 | LG13 | hypothetical protein CICLE_v1 | not DE   | not DE   | not DE   | not DE  |
| EVM0023408 | LG13 | hypothetical protein CICLE_v1 | not DE   | not DE   | not DE   | not DE  |
| EVM0021740 | LG13 | hypothetical protein CICLE_v1 | not DE   | not DE   | not DE   | not DE  |
| EVM0017503 | LG13 | hypothetical protein CICLE_v1 | not DE   | not DE   | not DE   | not DE  |
| EVM0001965 | LG13 | hypothetical protein CICLE_v1 | not DE   | not DE   | 1.339562 | 0.00026 |
| EVM0015069 | LG13 | hypothetical protein CICLE_v1 | 2.97684  | 0.031508 | not DE   | not DE  |
| EVM0017288 | LG13 | hypothetical protein CICLE_v1 | not DE   | not DE   | not DE   | not DE  |
| EVM0004038 | LG13 | hypothetical protein CICLE_v1 | not DE   | not DE   | not DE   | not DE  |
| EVM0006404 | LG13 | hypothetical protein CICLE_v1 | not DE   | not DE   | not DE   | not DE  |
| EVM0007370 | LG13 | hypothetical protein CICLE_v1 | not DE   | not DE   | not DE   | not DE  |
| EVM0015668 | LG13 | hypothetical protein CICLE_v1 | not DE   | not DE   | 1.002294 | #####   |
| EVM0005870 | LG13 | hypothetical protein CICLE_v1 | not DE   | not DE   | not DE   | not DE  |
| EVM0010032 | LG13 | hypothetical protein CICLE_v1 | not DE   | not DE   | not DE   | not DE  |
| EVM0022706 | LG13 | hypothetical protein CICLE_v1 | not DE   | not DE   | not DE   | not DE  |
| EVM0010550 | LG13 | hypothetical protein CICLE_v1 | 1.591178 | 0.029557 | not DE   | not DE  |
| EVM0001129 | LG13 | hypothetical protein CICLE_v1 | not DE   | not DE   | not DE   | not DE  |
| EVM0002138 | LG13 | hypothetical protein CICLE_v1 | not DE   | not DE   | not DE   | not DE  |
| EVM0004383 | LG13 | hypothetical protein CICLE_v1 | not DE   | not DE   | not DE   | not DE  |
| EVM0004931 | LG13 | hypothetical protein CICLE_v1 | not DE   | not DE   | not DE   | not DE  |
| EVM0017296 | LG13 | hypothetical protein CICLE_v1 | not DE   | not DE   | not DE   | not DE  |
| EVM0003172 | LG13 | hypothetical protein CICLE_v1 | not DE   | not DE   | not DE   | not DE  |
| EVM0013045 | LG13 | hypothetical protein CICLE_v1 | not DE   | not DE   | not DE   | not DE  |
| EVM0012091 | LG13 | hypothetical protein CICLE_v1 | not DE   | not DE   | not DE   | not DE  |
| EVM0005695 | LG13 | hypothetical protein CICLE_v1 | not DE   | not DE   | not DE   | not DE  |
| EVM0004183 | LG13 | hypothetical protein CICLE_v1 | not DE   | not DE   | not DE   | not DE  |
| EVM0007001 | LG13 | hypothetical protein CICLE_v1 | not DE   | not DE   | not DE   | not DE  |

|            |      |                               |          |          |          |         |
|------------|------|-------------------------------|----------|----------|----------|---------|
| EVM0012246 | LG13 | hypothetical protein CICLE_v1 | not DE   | not DE   | not DE   | not DE  |
| EVM0008802 | LG13 | hypothetical protein CICLE_v1 | not DE   | not DE   | not DE   | not DE  |
| EVM0009350 | LG13 | hypothetical protein CICLE_v1 | not DE   | not DE   | not DE   | not DE  |
| EVM0006343 | LG13 | hypothetical protein CICLE_v1 | not DE   | not DE   | not DE   | not DE  |
| EVM0022702 | LG13 | hypothetical protein CICLE_v1 | not DE   | not DE   | 1.299427 | #####   |
| EVM0006832 | LG13 | hypothetical protein CICLE_v1 | not DE   | not DE   | not DE   | not DE  |
| EVM0014907 | LG13 | hypothetical protein CICLE_v1 | not DE   | not DE   | not DE   | not DE  |
| EVM0006864 | LG13 | hypothetical protein CICLE_v1 | not DE   | not DE   | not DE   | not DE  |
| EVM0022968 | LG13 | hypothetical protein CICLE_v1 | not DE   | not DE   | not DE   | not DE  |
| EVM0019977 | LG13 | hypothetical protein CICLE_v1 | not DE   | not DE   | not DE   | not DE  |
| EVM0005587 | LG13 | hypothetical protein CICLE_v1 | not DE   | not DE   | not DE   | not DE  |
| EVM0005310 | LG13 | hypothetical protein CICLE_v1 | not DE   | not DE   | not DE   | not DE  |
| EVM0001494 | LG13 | hypothetical protein CICLE_v1 | not DE   | not DE   | not DE   | not DE  |
| EVM0003750 | LG13 | hypothetical protein CICLE_v1 | not DE   | not DE   | not DE   | not DE  |
| EVM0017713 | LG13 | hypothetical protein CICLE_v1 | not DE   | not DE   | 1.019942 | #####   |
| EVM0015907 | LG13 | hypothetical protein CICLE_v1 | not DE   | not DE   | not DE   | not DE  |
| EVM0015716 | LG13 | hypothetical protein CICLE_v1 | not DE   | not DE   | not DE   | not DE  |
| EVM0000233 | LG13 | hypothetical protein CICLE_v1 | not DE   | not DE   | not DE   | not DE  |
| EVM0015877 | LG13 | hypothetical protein CICLE_v1 | not DE   | not DE   | not DE   | not DE  |
| EVM0004124 | LG13 | hypothetical protein CICLE_v1 | not DE   | not DE   | not DE   | not DE  |
| EVM0010056 | LG13 | hypothetical protein CICLE_v1 | not DE   | not DE   | not DE   | not DE  |
| EVM0015528 | LG13 | hypothetical protein CICLE_v1 | not DE   | not DE   | not DE   | not DE  |
| EVM0006470 | LG13 | hypothetical protein CICLE_v1 | not DE   | not DE   | not DE   | not DE  |
| EVM0007973 | LG13 | hypothetical protein CICLE_v1 | not DE   | not DE   | not DE   | not DE  |
| EVM0014854 | LG13 | hypothetical protein CICLE_v1 | not DE   | not DE   | not DE   | not DE  |
| EVM0018113 | LG13 | hypothetical protein CICLE_v1 | not DE   | not DE   | not DE   | not DE  |
| EVM0011055 | LG13 | hypothetical protein CICLE_v1 | 2.949672 | 2.03E-05 | 1.493642 | 0.00861 |
| EVM0002703 | LG13 | hypothetical protein CICLE_v1 | not DE   | not DE   | not DE   | not DE  |
| EVM0020820 | LG13 | hypothetical protein CICLE_v1 | not DE   | not DE   | not DE   | not DE  |
| EVM0024528 | LG13 | hypothetical protein CICLE_v1 | not DE   | not DE   | not DE   | not DE  |
| EVM0010704 | LG13 | hypothetical protein CICLE_v1 | not DE   | not DE   | not DE   | not DE  |
| EVM0004029 | LG13 | hypothetical protein CICLE_v1 | not DE   | not DE   | not DE   | not DE  |
| EVM0016947 | LG13 | hypothetical protein CICLE_v1 | not DE   | not DE   | not DE   | not DE  |
| EVM0004407 | LG13 | hypothetical protein CICLE_v1 | not DE   | not DE   | not DE   | not DE  |
| EVM0012197 | LG13 | hypothetical protein CICLE_v1 | not DE   | not DE   | not DE   | not DE  |
| EVM0024198 | LG13 | hypothetical protein CICLE_v1 | not DE   | not DE   | not DE   | not DE  |
| EVM0013947 | LG13 | hypothetical protein CICLE_v1 | not DE   | not DE   | not DE   | not DE  |
| EVM0014759 | LG13 | hypothetical protein CICLE_v1 | not DE   | not DE   | not DE   | not DE  |
| EVM0003813 | LG13 | hypothetical protein CICLE_v1 | not DE   | not DE   | not DE   | not DE  |
| EVM0017667 | LG13 | hypothetical protein CICLE_v1 | not DE   | not DE   | not DE   | not DE  |
| EVM0014853 | LG13 | hypothetical protein CICLE_v1 | not DE   | not DE   | not DE   | not DE  |
| EVM0024177 | LG13 | hypothetical protein CICLE_v1 | 2.169471 | 0.033435 | not DE   | not DE  |
| EVM0005432 | LG13 | hypothetical protein CICLE_v1 | not DE   | not DE   | not DE   | not DE  |
| EVM0022384 | LG13 | hypothetical protein CICLE_v1 | not DE   | not DE   | not DE   | not DE  |
| EVM0001447 | LG13 | hypothetical protein CICLE_v1 | not DE   | not DE   | not DE   | not DE  |
| EVM0020941 | LG13 | hypothetical protein CICLE_v1 | not DE   | not DE   | not DE   | not DE  |
| EVM0021414 | LG13 | hypothetical protein CICLE_v1 | not DE   | not DE   | not DE   | not DE  |
| EVM0020252 | LG13 | hypothetical protein CICLE_v1 | not DE   | not DE   | not DE   | not DE  |
| EVM0018149 | LG13 | hypothetical protein CICLE_v1 | not DE   | not DE   | not DE   | not DE  |
| EVM0018836 | LG13 | hypothetical protein CICLE_v1 | not DE   | not DE   | not DE   | not DE  |
| EVM0002587 | LG13 | hypothetical protein CICLE_v1 | not DE   | not DE   | not DE   | not DE  |
| EVM0021297 | LG13 | hypothetical protein CICLE_v1 | not DE   | not DE   | not DE   | not DE  |
| EVM0017148 | LG13 | hypothetical protein CICLE_v1 | not DE   | not DE   | not DE   | not DE  |
| EVM0020179 | LG13 | hypothetical protein CICLE_v1 | not DE   | not DE   | not DE   | not DE  |

|            |      |                               |          |          |          |         |
|------------|------|-------------------------------|----------|----------|----------|---------|
| EVM0003757 | LG13 | hypothetical protein CICLE_v1 | not DE   | not DE   | not DE   | not DE  |
| EVM0008409 | LG13 | hypothetical protein CICLE_v1 | not DE   | not DE   | not DE   | not DE  |
| EVM0014847 | LG13 | hypothetical protein CICLE_v1 | not DE   | not DE   | 1.934583 | 0.01692 |
| EVM0014377 | LG13 | hypothetical protein CICLE_v1 | not DE   | not DE   | not DE   | not DE  |
| EVM0024422 | LG13 | hypothetical protein CICLE_v1 | not DE   | not DE   | not DE   | not DE  |
| EVM0004978 | LG13 | hypothetical protein CICLE_v1 | not DE   | not DE   | not DE   | not DE  |
| EVM0023785 | LG13 | hypothetical protein CICLE_v1 | not DE   | not DE   | not DE   | not DE  |
| EVM0021641 | LG13 | hypothetical protein CICLE_v1 | not DE   | not DE   | not DE   | not DE  |
| EVM0008071 | LG13 | hypothetical protein CICLE_v1 | not DE   | not DE   | not DE   | not DE  |
| EVM0013637 | LG13 | hypothetical protein CICLE_v1 | not DE   | not DE   | not DE   | not DE  |
| EVM0014914 | LG13 | hypothetical protein CICLE_v1 | not DE   | not DE   | not DE   | not DE  |
| EVM0008573 | LG13 | hypothetical protein CICLE_v1 | not DE   | not DE   | not DE   | not DE  |
| EVM0011630 | LG13 | hypothetical protein CICLE_v1 | not DE   | not DE   | not DE   | not DE  |
| EVM0022244 | LG13 | hypothetical protein CICLE_v1 | not DE   | not DE   | not DE   | not DE  |
| EVM0010751 | LG13 | hypothetical protein CICLE_v1 | not DE   | not DE   | not DE   | not DE  |
| EVM0014421 | LG13 | hypothetical protein CICLE_v1 | not DE   | not DE   | not DE   | not DE  |
| EVM0000374 | LG13 | hypothetical protein CICLE_v1 | not DE   | not DE   | not DE   | not DE  |
| EVM0001638 | LG13 | hypothetical protein CICLE_v1 | not DE   | not DE   | not DE   | not DE  |
| EVM0008050 | LG13 | hypothetical protein CICLE_v1 | 5.212588 | 1.09E-18 | not DE   | not DE  |
| EVM0014067 | LG13 | hypothetical protein CICLE_v1 | not DE   | not DE   | not DE   | not DE  |
| EVM0018440 | LG13 | hypothetical protein CICLE_v1 | not DE   | not DE   | not DE   | not DE  |
| EVM0018390 | LG13 | hypothetical protein CICLE_v1 | not DE   | not DE   | not DE   | not DE  |
| EVM0010511 | LG13 | hypothetical protein CICLE_v1 | not DE   | not DE   | not DE   | not DE  |
| EVM0013435 | LG13 | hypothetical protein CICLE_v1 | not DE   | not DE   | not DE   | not DE  |
| EVM0000090 | LG13 | hypothetical protein CICLE_v1 | not DE   | not DE   | not DE   | not DE  |
| EVM0010726 | LG13 | hypothetical protein CICLE_v1 | not DE   | not DE   | not DE   | not DE  |
| EVM0004113 | LG13 | hypothetical protein CICLE_v1 | not DE   | not DE   | not DE   | not DE  |
| EVM0006178 | LG13 | hypothetical protein CICLE_v1 | not DE   | not DE   | not DE   | not DE  |
| EVM0015688 | LG13 | hypothetical protein CISIN_1g | not DE   | not DE   | not DE   | not DE  |
| EVM0016059 | LG13 | hypothetical protein CISIN_1g | not DE   | not DE   | not DE   | not DE  |
| EVM0007785 | LG13 | hypothetical protein CISIN_1g | 1.621001 | 0.040962 | not DE   | not DE  |
| EVM0020869 | LG13 | hypothetical protein CISIN_1g | not DE   | not DE   | -1.11291 | #####   |
| EVM0007093 | LG13 | hypothetical protein CISIN_1g | not DE   | not DE   | not DE   | not DE  |
| EVM0007543 | LG13 | hypothetical protein CISIN_1g | not DE   | not DE   | not DE   | not DE  |
| EVM0020154 | LG13 | hypothetical protein CISIN_1g | not DE   | not DE   | -1.05911 | 0.04492 |
| EVM0015681 | LG13 | hypothetical protein CISIN_1g | not DE   | not DE   | not DE   | not DE  |
| EVM0005895 | LG13 | hypothetical protein CISIN_1g | not DE   | not DE   | not DE   | not DE  |
| EVM0020995 | LG13 | hypothetical protein CISIN_1g | not DE   | not DE   | not DE   | not DE  |
| EVM0005863 | LG13 | hypothetical protein CISIN_1g | not DE   | not DE   | not DE   | not DE  |
| EVM0008710 | LG13 | hypothetical protein CISIN_1g | not DE   | not DE   | not DE   | not DE  |
| EVM0008671 | LG13 | hypothetical protein CISIN_1g | not DE   | not DE   | not DE   | not DE  |
| EVM0000671 | LG13 | hypothetical protein CISIN_1g | not DE   | not DE   | not DE   | not DE  |
| EVM0017211 | LG13 | hypothetical protein CISIN_1g | not DE   | not DE   | not DE   | not DE  |
| EVM0005845 | LG13 | hypothetical protein CISIN_1g | not DE   | not DE   | not DE   | not DE  |
| EVM0008887 | LG13 | hypothetical protein CISIN_1g | not DE   | not DE   | not DE   | not DE  |
| EVM0021708 | LG13 | hypothetical protein CISIN_1g | not DE   | not DE   | not DE   | not DE  |
| EVM0000502 | LG13 | hypothetical protein CISIN_1g | not DE   | not DE   | not DE   | not DE  |
| EVM0000226 | LG13 | hypothetical protein CISIN_1g | not DE   | not DE   | not DE   | not DE  |
| EVM0000148 | LG13 | hypothetical protein CISIN_1g | not DE   | not DE   | not DE   | not DE  |
| EVM0020310 | LG13 | hypothetical protein CISIN_1g | not DE   | not DE   | not DE   | not DE  |
| EVM0011162 | LG13 | hypothetical protein CISIN_1g | not DE   | not DE   | not DE   | not DE  |
| EVM0017962 | LG13 | hypothetical protein CISIN_1g | not DE   | not DE   | not DE   | not DE  |
| EVM0020366 | LG13 | hypothetical protein CISIN_1g | not DE   | not DE   | not DE   | not DE  |
| EVM0014929 | LG13 | hypothetical protein CISIN_1g | not DE   | not DE   | not DE   | not DE  |

|            |      |                               |          |          |        |        |
|------------|------|-------------------------------|----------|----------|--------|--------|
| EVM0008516 | LG13 | hypothetical protein CISIN_1g | -1.5444  | 0.045128 | not DE | not DE |
| EVM0016154 | LG13 | hypothetical protein CISIN_1g | not DE   | not DE   | not DE | not DE |
| EVM0000184 | LG13 | hypothetical protein CISIN_1g | not DE   | not DE   | not DE | not DE |
| EVM0020047 | LG13 | hypothetical protein CISIN_1g | not DE   | not DE   | not DE | not DE |
| EVM0010196 | LG13 | hypothetical protein CISIN_1g | not DE   | not DE   | not DE | not DE |
| EVM0011916 | LG13 | hypothetical protein CISIN_1g | not DE   | not DE   | not DE | not DE |
| EVM0011673 | LG13 | hypothetical protein CISIN_1g | not DE   | not DE   | not DE | not DE |
| EVM0004589 | LG13 | hypothetical protein CISIN_1g | not DE   | not DE   | not DE | not DE |
| EVM0018187 | LG13 | hypothetical protein CISIN_1g | not DE   | not DE   | not DE | not DE |
| EVM0001553 | LG13 | hypothetical protein CISIN_1g | not DE   | not DE   | not DE | not DE |
| EVM0004865 | LG13 | hypothetical protein CISIN_1g | not DE   | not DE   | not DE | not DE |
| EVM0009023 | LG13 | hypothetical protein CISIN_1g | not DE   | not DE   | not DE | not DE |
| EVM0017066 | LG13 | hypothetical protein CISIN_1g | -1.43032 | 0.02994  | not DE | not DE |
| EVM0001859 | LG13 | hypothetical protein CISIN_1g | 2.175461 | 0.02489  | not DE | not DE |
| EVM0020275 | LG13 | hypothetical protein CISIN_1g | 1.010365 | 0.006476 | not DE | not DE |
| EVM0022296 | LG13 | hypothetical protein CISIN_1g | not DE   | not DE   | not DE | not DE |
| EVM0001540 | LG13 | hypothetical protein CISIN_1g | not DE   | not DE   | not DE | not DE |
| EVM0011421 | LG13 | hypothetical protein CISIN_1g | not DE   | not DE   | not DE | not DE |
| EVM0014647 | LG13 | hypothetical protein CISIN_1g | not DE   | not DE   | not DE | not DE |
| EVM0010369 | LG13 | hypothetical protein CISIN_1g | not DE   | not DE   | not DE | not DE |
| EVM0019041 | LG13 | hypothetical protein CISIN_1g | not DE   | not DE   | not DE | not DE |
| EVM0009289 | LG13 | hypothetical protein CISIN_1g | not DE   | not DE   | not DE | not DE |
| EVM0019966 | LG13 | hypothetical protein CISIN_1g | not DE   | not DE   | not DE | not DE |
| EVM0012855 | LG13 | hypothetical protein CISIN_1g | not DE   | not DE   | not DE | not DE |
| EVM0011980 | LG13 | hypothetical protein CISIN_1g | not DE   | not DE   | not DE | not DE |
| EVM0020449 | LG13 | hypothetical protein CISIN_1g | not DE   | not DE   | not DE | not DE |
| EVM0002558 | LG13 | hypothetical protein CISIN_1g | not DE   | not DE   | not DE | not DE |
| EVM0022784 | LG13 | hypothetical protein CISIN_1g | 2.064601 | 0.000136 | not DE | not DE |
| EVM0005867 | LG13 | hypothetical protein CISIN_1g | not DE   | not DE   | not DE | not DE |
| EVM0023403 | LG13 | hypothetical protein CISIN_1g | not DE   | not DE   | not DE | not DE |
| EVM0017552 | LG13 | hypothetical protein CISIN_1g | not DE   | not DE   | not DE | not DE |
| EVM0001683 | LG13 | hypothetical protein CISIN_1g | not DE   | not DE   | not DE | not DE |
| EVM0015381 | LG13 | hypothetical protein CISIN_1g | not DE   | not DE   | not DE | not DE |
| EVM0011791 | LG13 | hypothetical protein CISIN_1g | -1.08801 | 0.021066 | not DE | not DE |
| EVM0011099 | LG13 | hypothetical protein CISIN_1g | not DE   | not DE   | not DE | not DE |
| EVM0008655 | LG13 | hypothetical protein CISIN_1g | not DE   | not DE   | not DE | not DE |
| EVM0020529 | LG13 | hypothetical protein CISIN_1g | not DE   | not DE   | not DE | not DE |
| EVM0013593 | LG13 | hypothetical protein CISIN_1g | not DE   | not DE   | not DE | not DE |
| EVM0023742 | LG13 | hypothetical protein CISIN_1g | not DE   | not DE   | not DE | not DE |
| EVM0004838 | LG13 | hypothetical protein CISIN_1g | not DE   | not DE   | not DE | not DE |
| EVM0023140 | LG13 | hypothetical protein CISIN_1g | not DE   | not DE   | not DE | not DE |
| EVM0002664 | LG13 | hypothetical protein CISIN_1g | 5.664138 | 1.96E-10 | not DE | not DE |
| EVM0004507 | LG13 | hypothetical protein CISIN_1g | not DE   | not DE   | not DE | not DE |
| EVM0010139 | LG13 | hypothetical protein CISIN_1g | 5.84132  | 2.45E-06 | not DE | not DE |
| EVM0013544 | LG13 | hypothetical protein CISIN_1g | 3.131239 | 0.005943 | not DE | not DE |
| EVM0013664 | LG13 | hypothetical protein CISIN_1g | 1.765325 | 0.015634 | not DE | not DE |
| EVM0013826 | LG13 | hypothetical protein CISIN_1g | 4.825577 | 7.75E-11 | not DE | not DE |
| EVM0014702 | LG13 | hypothetical protein CISIN_1g | not DE   | not DE   | not DE | not DE |
| EVM0022919 | LG13 | hypothetical protein CISIN_1g | not DE   | not DE   | not DE | not DE |
| EVM0024115 | LG13 | hypothetical protein CISIN_1g | not DE   | not DE   | not DE | not DE |
| EVM0015235 | LG13 | hypothetical protein CISIN_1g | not DE   | not DE   | not DE | not DE |
| EVM0008446 | LG13 | hypothetical protein CISIN_1g | 1.942902 | 0.006905 | not DE | not DE |
| EVM0001811 | LG13 | hypothetical protein CISIN_1g | not DE   | not DE   | not DE | not DE |
| EVM0024394 | LG13 | hypothetical protein CISIN_1g | not DE   | not DE   | not DE | not DE |





|            |      |                               |          |          |          |         |
|------------|------|-------------------------------|----------|----------|----------|---------|
| EVM0021693 | LG13 | hypothetical protein CISIN_1g | not DE   | not DE   | not DE   | not DE  |
| EVM0005638 | LG13 | hypothetical protein CISIN_1g | not DE   | not DE   | not DE   | not DE  |
| EVM0016971 | LG13 | hypothetical protein CISIN_1g | not DE   | not DE   | not DE   | not DE  |
| EVM0005286 | LG13 | hypothetical protein CISIN_1g | not DE   | not DE   | not DE   | not DE  |
| EVM0018029 | LG13 | hypothetical protein CISIN_1g | not DE   | not DE   | not DE   | not DE  |
| EVM0000852 | LG13 | hypothetical protein CISIN_1g | not DE   | not DE   | not DE   | not DE  |
| EVM0018828 | LG13 | hypothetical protein CISIN_1g | not DE   | not DE   | not DE   | not DE  |
| EVM0024182 | LG13 | hypothetical protein CISIN_1g | not DE   | not DE   | not DE   | not DE  |
| EVM0008372 | LG13 | hypothetical protein CISIN_1g | not DE   | not DE   | not DE   | not DE  |
| EVM0016626 | LG13 | hypothetical protein CISIN_1g | -1.25584 | 2.07E-07 | not DE   | not DE  |
| EVM0004571 | LG13 | hypothetical protein CISIN_1g | not DE   | not DE   | not DE   | not DE  |
| EVM0018253 | LG13 | hypothetical protein CISIN_1g | not DE   | not DE   | not DE   | not DE  |
| EVM0011842 | LG13 | hypothetical protein CISIN_1g | not DE   | not DE   | not DE   | not DE  |
| EVM0022627 | LG13 | hypothetical protein CISIN_1g | not DE   | not DE   | not DE   | not DE  |
| EVM0021881 | LG13 | hypothetical protein CISIN_1g | not DE   | not DE   | not DE   | not DE  |
| EVM0019604 | LG13 | hypothetical protein CISIN_1g | not DE   | not DE   | not DE   | not DE  |
| EVM0020717 | LG13 | hypothetical protein CISIN_1g | not DE   | not DE   | not DE   | not DE  |
| EVM0003138 | LG13 | hypothetical protein CISIN_1g | -1.90849 | 8.62E-06 | not DE   | not DE  |
| EVM0001484 | LG13 | hypothetical protein CISIN_1g | not DE   | not DE   | not DE   | not DE  |
| EVM0011653 | LG13 | hypothetical protein CISIN_1g | 6.219068 | 1.65E-12 | not DE   | not DE  |
| EVM0011736 | LG13 | hypothetical protein CISIN_1g | 7.446715 | 1.65E-12 | not DE   | not DE  |
| EVM0011296 | LG13 | hypothetical protein CISIN_1g | not DE   | not DE   | not DE   | not DE  |
| EVM0009325 | LG13 | hypothetical protein CISIN_1g | not DE   | not DE   | not DE   | not DE  |
| EVM0013126 | LG13 | hypothetical protein CISIN_1g | not DE   | not DE   | not DE   | not DE  |
| EVM0014357 | LG13 | hypothetical protein CISIN_1g | 4.847695 | 0.002461 | not DE   | not DE  |
| EVM0011534 | LG13 | hypothetical protein CISIN_1g | not DE   | not DE   | not DE   | not DE  |
| EVM0001823 | LG13 | hypothetical protein CISIN_1g | not DE   | not DE   | not DE   | not DE  |
| EVM0008520 | LG13 | hypothetical protein CISIN_1g | not DE   | not DE   | not DE   | not DE  |
| EVM0011917 | LG13 | hypothetical protein CISIN_1g | not DE   | not DE   | not DE   | not DE  |
| EVM0015820 | LG13 | hypothetical protein CISIN_1g | not DE   | not DE   | not DE   | not DE  |
| EVM0012166 | LG13 | hypothetical protein CISIN_1g | 2.133349 | 0.023292 | not DE   | not DE  |
| EVM0016184 | LG13 | hypothetical protein CISIN_1g | not DE   | not DE   | not DE   | not DE  |
| EVM0019255 | LG13 | hypothetical protein CISIN_1g | not DE   | not DE   | not DE   | not DE  |
| EVM0000165 | LG13 | hypothetical protein CISIN_1g | not DE   | not DE   | not DE   | not DE  |
| EVM0004187 | LG13 | hypothetical protein CISIN_1g | not DE   | not DE   | not DE   | not DE  |
| EVM0001512 | LG13 | hypothetical protein CISIN_1g | not DE   | not DE   | not DE   | not DE  |
| EVM0010738 | LG13 | hypothetical protein CISIN_1g | not DE   | not DE   | not DE   | not DE  |
| EVM0017914 | LG13 | hypothetical protein CISIN_1g | not DE   | not DE   | not DE   | not DE  |
| EVM0004154 | LG13 | hypothetical protein CISIN_1g | not DE   | not DE   | not DE   | not DE  |
| EVM0021146 | LG13 | hypothetical protein CISIN_1g | not DE   | not DE   | not DE   | not DE  |
| EVM0014443 | LG13 | hypothetical protein CISIN_1g | 1.359286 | 9.57E-06 | not DE   | not DE  |
| EVM0010669 | LG13 | hypothetical protein CISIN_1g | not DE   | not DE   | not DE   | not DE  |
| EVM0017853 | LG13 | hypothetical protein CISIN_1g | not DE   | not DE   | not DE   | not DE  |
| EVM0019485 | LG13 | hypothetical protein CISIN_1g | not DE   | not DE   | not DE   | not DE  |
| EVM0009050 | LG13 | hypothetical protein CISIN_1g | not DE   | not DE   | not DE   | not DE  |
| EVM0003907 | LG13 | hypothetical protein CISIN_1g | not DE   | not DE   | 1.41067  | #####   |
| EVM0022623 | LG13 | hypothetical protein CISIN_1g | not DE   | not DE   | not DE   | not DE  |
| EVM0011920 | LG13 | hypothetical protein CISIN_1g | not DE   | not DE   | not DE   | not DE  |
| EVM0015030 | LG13 | hypothetical protein CISIN_1g | not DE   | not DE   | 3.834801 | 0.01775 |
| EVM0020145 | LG13 | hypothetical protein CISIN_1g | not DE   | not DE   | not DE   | not DE  |
| EVM0003132 | LG13 | hypothetical protein CISIN_1g | not DE   | not DE   | not DE   | not DE  |
| EVM0006457 | LG13 | hypothetical protein CISIN_1g | not DE   | not DE   | not DE   | not DE  |
| EVM0000081 | LG13 | hypothetical protein CISIN_1g | not DE   | not DE   | not DE   | not DE  |
| EVM0023317 | LG13 | hypothetical protein CISIN_1g | not DE   | not DE   | not DE   | not DE  |

|            |      |                               |          |          |          |         |
|------------|------|-------------------------------|----------|----------|----------|---------|
| EVM0001995 | LG13 | hypothetical protein CISIN_1g | 3.139446 | 0.005054 | not DE   | not DE  |
| EVM0005315 | LG13 | hypothetical protein CISIN_1g | not DE   | not DE   | not DE   | not DE  |
| EVM0005477 | LG13 | hypothetical protein CISIN_1g | not DE   | not DE   | not DE   | not DE  |
| EVM0002530 | LG13 | hypothetical protein CISIN_1g | not DE   | not DE   | not DE   | not DE  |
| EVM0013384 | LG13 | hypothetical protein CISIN_1g | not DE   | not DE   | not DE   | not DE  |
| EVM0024262 | LG13 | hypothetical protein CISIN_1g | not DE   | not DE   | not DE   | not DE  |
| EVM0003549 | LG13 | hypothetical protein CISIN_1g | not DE   | not DE   | not DE   | not DE  |
| EVM0021675 | LG13 | hypothetical protein CISIN_1g | 1.626022 | 6.08E-09 | not DE   | not DE  |
| EVM0014615 | LG13 | hypothetical protein CISIN_1g | not DE   | not DE   | not DE   | not DE  |
| EVM0021322 | LG13 | hypothetical protein CISIN_1g | not DE   | not DE   | not DE   | not DE  |
| EVM0000971 | LG13 | hypothetical protein EUGRSUZ_ | not DE   | not DE   | not DE   | not DE  |
| EVM0016112 | LG13 | hypothetical protein EUGRSUZ_ | not DE   | not DE   | not DE   | not DE  |
| EVM0016786 | LG13 | hypothetical protein EUGRSUZ_ | not DE   | not DE   | not DE   | not DE  |
| EVM0004986 | LG13 | hypothetical protein EUTSA_vl | not DE   | not DE   | not DE   | not DE  |
| EVM0022464 | LG13 | hypothetical protein F383_097 | not DE   | not DE   | not DE   | not DE  |
| EVM0011030 | LG13 | hypothetical protein F383_182 | not DE   | not DE   | not DE   | not DE  |
| EVM0015090 | LG13 | hypothetical protein F383_344 | not DE   | not DE   | not DE   | not DE  |
| EVM0011283 | LG13 | hypothetical protein JCGZ_003 | not DE   | not DE   | not DE   | not DE  |
| EVM0003561 | LG13 | hypothetical protein JCGZ_004 | -3.45745 | 7.17E-15 | not DE   | not DE  |
| EVM0004626 | LG13 | hypothetical protein JCGZ_004 | not DE   | not DE   | not DE   | not DE  |
| EVM0002437 | LG13 | hypothetical protein JCGZ_004 | not DE   | not DE   | not DE   | not DE  |
| EVM0014824 | LG13 | hypothetical protein JCGZ_005 | not DE   | not DE   | not DE   | not DE  |
| EVM0015286 | LG13 | hypothetical protein JCGZ_030 | not DE   | not DE   | not DE   | not DE  |
| EVM0009212 | LG13 | hypothetical protein JCGZ_062 | -1.43229 | 1.39E-05 | not DE   | not DE  |
| EVM0004219 | LG13 | hypothetical protein JCGZ_067 | not DE   | not DE   | not DE   | not DE  |
| EVM0023267 | LG13 | hypothetical protein JCGZ_067 | not DE   | not DE   | not DE   | not DE  |
| EVM0010141 | LG13 | hypothetical protein JCGZ_087 | not DE   | not DE   | not DE   | not DE  |
| EVM0001802 | LG13 | hypothetical protein JCGZ_088 | not DE   | not DE   | not DE   | not DE  |
| EVM0013623 | LG13 | hypothetical protein JCGZ_088 | not DE   | not DE   | not DE   | not DE  |
| EVM0000160 | LG13 | hypothetical protein JCGZ_090 | not DE   | not DE   | -2.56446 | 0.00135 |
| EVM0024077 | LG13 | hypothetical protein JCGZ_091 | not DE   | not DE   | not DE   | not DE  |
| EVM0021722 | LG13 | hypothetical protein JCGZ_096 | not DE   | not DE   | not DE   | not DE  |
| EVM0004929 | LG13 | hypothetical protein JCGZ_096 | not DE   | not DE   | not DE   | not DE  |
| EVM0023154 | LG13 | hypothetical protein JCGZ_107 | not DE   | not DE   | not DE   | not DE  |
| EVM0022942 | LG13 | hypothetical protein JCGZ_126 | not DE   | not DE   | not DE   | not DE  |
| EVM0020160 | LG13 | hypothetical protein JCGZ_129 | not DE   | not DE   | not DE   | not DE  |
| EVM0009480 | LG13 | hypothetical protein JCGZ_133 | not DE   | not DE   | not DE   | not DE  |
| EVM0014587 | LG13 | hypothetical protein JCGZ_165 | not DE   | not DE   | not DE   | not DE  |
| EVM0021857 | LG13 | hypothetical protein JCGZ_165 | not DE   | not DE   | not DE   | not DE  |
| EVM0019421 | LG13 | hypothetical protein JCGZ_165 | -2.60435 | 0.033681 | -1.40763 | #####   |
| EVM0021343 | LG13 | hypothetical protein JCGZ_166 | not DE   | not DE   | not DE   | not DE  |
| EVM0014901 | LG13 | hypothetical protein JCGZ_166 | not DE   | not DE   | not DE   | not DE  |
| EVM0008124 | LG13 | hypothetical protein JCGZ_186 | not DE   | not DE   | not DE   | not DE  |
| EVM0008728 | LG13 | hypothetical protein JCGZ_186 | not DE   | not DE   | not DE   | not DE  |
| EVM0008252 | LG13 | hypothetical protein JCGZ_198 | not DE   | not DE   | not DE   | not DE  |
| EVM0005819 | LG13 | hypothetical protein JCGZ_198 | not DE   | not DE   | not DE   | not DE  |
| EVM0009752 | LG13 | hypothetical protein JCGZ_198 | not DE   | not DE   | not DE   | not DE  |
| EVM0018450 | LG13 | hypothetical protein JCGZ_198 | not DE   | not DE   | -1.84887 | 0.00426 |
| EVM0020671 | LG13 | hypothetical protein JCGZ_199 | not DE   | not DE   | not DE   | not DE  |
| EVM0011147 | LG13 | hypothetical protein JCGZ_222 | not DE   | not DE   | not DE   | not DE  |
| EVM0003507 | LG13 | hypothetical protein JCGZ_236 | 1.496018 | 0.001998 | 1.643288 | #####   |
| EVM0016433 | LG13 | hypothetical protein JCGZ_236 | not DE   | not DE   | not DE   | not DE  |
| EVM0013055 | LG13 | hypothetical protein JCGZ_236 | not DE   | not DE   | not DE   | not DE  |
| EVM0017644 | LG13 | hypothetical protein JCGZ_236 | not DE   | not DE   | not DE   | not DE  |

|            |      |                               |          |          |          |         |
|------------|------|-------------------------------|----------|----------|----------|---------|
| EVM0010041 | LG13 | hypothetical protein JCGZ_251 | not DE   | not DE   | not DE   | not DE  |
| EVM0010884 | LG13 | hypothetical protein JCGZ_255 | -3.10835 | 7.07E-11 | -1.85092 | #####   |
| EVM0006022 | LG13 | hypothetical protein JCGZ_255 | not DE   | not DE   | not DE   | not DE  |
| EVM0012125 | LG13 | hypothetical protein JCGZ_256 | not DE   | not DE   | not DE   | not DE  |
| EVM0011108 | LG13 | hypothetical protein JCGZ_256 | not DE   | not DE   | not DE   | not DE  |
| EVM0008988 | LG13 | hypothetical protein JCGZ_267 | not DE   | not DE   | 1.016584 | 0.00013 |
| EVM0012644 | LG13 | hypothetical protein L484_001 | not DE   | not DE   | not DE   | not DE  |
| EVM0016271 | LG13 | hypothetical protein L484_002 | not DE   | not DE   | not DE   | not DE  |
| EVM0018552 | LG13 | hypothetical protein L484_022 | not DE   | not DE   | 1.066963 | #####   |
| EVM0000619 | LG13 | hypothetical protein L484_024 | not DE   | not DE   | not DE   | not DE  |
| EVM0016914 | LG13 | hypothetical protein MIMGU_mg | not DE   | not DE   | 1.189995 | 0.0017  |
| EVM0001328 | LG13 | hypothetical protein PHAVU_00 | not DE   | not DE   | not DE   | not DE  |
| EVM0017512 | LG13 | hypothetical protein PHAVU_00 | not DE   | not DE   | not DE   | not DE  |
| EVM0005629 | LG13 | hypothetical protein PHAVU_01 | not DE   | not DE   | not DE   | not DE  |
| EVM0004860 | LG13 | hypothetical protein POPTR_00 | not DE   | not DE   | not DE   | not DE  |
| EVM0006738 | LG13 | hypothetical protein POPTR_00 | not DE   | not DE   | not DE   | not DE  |
| EVM0020643 | LG13 | hypothetical protein POPTR_00 | not DE   | not DE   | not DE   | not DE  |
| EVM0002250 | LG13 | hypothetical protein POPTR_00 | not DE   | not DE   | not DE   | not DE  |
| EVM0011314 | LG13 | hypothetical protein POPTR_00 | not DE   | not DE   | not DE   | not DE  |
| EVM0016440 | LG13 | hypothetical protein POPTR_00 | not DE   | not DE   | not DE   | not DE  |
| EVM0024041 | LG13 | hypothetical protein POPTR_00 | not DE   | not DE   | not DE   | not DE  |
| EVM0021863 | LG13 | hypothetical protein POPTR_00 | not DE   | not DE   | not DE   | not DE  |
| EVM0008199 | LG13 | hypothetical protein POPTR_00 | not DE   | not DE   | not DE   | not DE  |
| EVM0010014 | LG13 | hypothetical protein POPTR_00 | not DE   | not DE   | not DE   | not DE  |
| EVM0021609 | LG13 | hypothetical protein POPTR_00 | not DE   | not DE   | not DE   | not DE  |
| EVM0023233 | LG13 | hypothetical protein POPTR_00 | not DE   | not DE   | not DE   | not DE  |
| EVM0011997 | LG13 | hypothetical protein POPTR_00 | not DE   | not DE   | 1.449233 | #####   |
| EVM0001332 | LG13 | hypothetical protein POPTR_00 | 6.800394 | 1.51E-08 | not DE   | not DE  |
| EVM0000504 | LG13 | hypothetical protein POPTR_00 | not DE   | not DE   | not DE   | not DE  |
| EVM0019653 | LG13 | hypothetical protein POPTR_00 | not DE   | not DE   | not DE   | not DE  |
| EVM0022162 | LG13 | hypothetical protein POPTR_00 | not DE   | not DE   | not DE   | not DE  |
| EVM0006369 | LG13 | hypothetical protein POPTR_00 | not DE   | not DE   | not DE   | not DE  |
| EVM0008756 | LG13 | hypothetical protein POPTR_00 | not DE   | not DE   | not DE   | not DE  |
| EVM0012745 | LG13 | hypothetical protein POPTR_00 | not DE   | not DE   | not DE   | not DE  |
| EVM0016241 | LG13 | hypothetical protein POPTR_00 | not DE   | not DE   | not DE   | not DE  |
| EVM0019668 | LG13 | hypothetical protein PRUPE_pp | not DE   | not DE   | -1.47982 | 0.00047 |
| EVM0001231 | LG13 | hypothetical protein PRUPE_pp | not DE   | not DE   | not DE   | not DE  |
| EVM0006519 | LG13 | hypothetical protein PRUPE_pp | not DE   | not DE   | not DE   | not DE  |
| EVM0000169 | LG13 | hypothetical protein PRUPE_pp | not DE   | not DE   | not DE   | not DE  |
| EVM0011212 | LG13 | hypothetical protein PRUPE_pp | not DE   | not DE   | not DE   | not DE  |
| EVM0009787 | LG13 | hypothetical protein PRUPE_pp | not DE   | not DE   | not DE   | not DE  |
| EVM0022182 | LG13 | hypothetical protein PRUPE_pp | not DE   | not DE   | not DE   | not DE  |
| EVM0009110 | LG13 | hypothetical protein PRUPE_pp | not DE   | not DE   | not DE   | not DE  |
| EVM0008685 | LG13 | hypothetical protein PRUPE_pp | not DE   | not DE   | not DE   | not DE  |
| EVM0015775 | LG13 | hypothetical protein PRUPE_pp | not DE   | not DE   | not DE   | not DE  |
| EVM0018570 | LG13 | hypothetical protein PRUPE_pp | not DE   | not DE   | not DE   | not DE  |
| EVM0003278 | LG13 | hypothetical protein PRUPE_pp | not DE   | not DE   | not DE   | not DE  |
| EVM0015973 | LG13 | hypothetical protein PRUPE_pp | not DE   | not DE   | not DE   | not DE  |
| EVM0001972 | LG13 | hypothetical protein PRUPE_pp | not DE   | not DE   | not DE   | not DE  |
| EVM0015635 | LG13 | hypothetical protein PRUPE_pp | not DE   | not DE   | not DE   | not DE  |
| EVM0023432 | LG13 | hypothetical protein PRUPE_pp | not DE   | not DE   | not DE   | not DE  |
| EVM0003471 | LG13 | hypothetical protein PRUPE_pp | not DE   | not DE   | not DE   | not DE  |
| EVM0012873 | LG13 | hypothetical protein RCOM_058 | not DE   | not DE   | not DE   | not DE  |
| EVM0010413 | LG13 | hypothetical protein VITISV_C | not DE   | not DE   | not DE   | not DE  |

|            |      |                                |          |          |          |         |
|------------|------|--------------------------------|----------|----------|----------|---------|
| EVM0002809 | LG13 | hypothetical protein VITISV_0  | not DE   | not DE   | not DE   | not DE  |
| EVM0014659 | LG13 | hypothetical protein VITISV_0  | not DE   | not DE   | not DE   | not DE  |
| EVM0016619 | LG13 | hypothetical protein VITISV_0  | not DE   | not DE   | not DE   | not DE  |
| EVM0002264 | LG13 | hypothetical protein VITISV_0  | not DE   | not DE   | not DE   | not DE  |
| EVM0021125 | LG13 | hypothetical protein VITISV_0  | not DE   | not DE   | not DE   | not DE  |
| EVM0021516 | LG13 | hypothetical protein VITISV_0  | not DE   | not DE   | not DE   | not DE  |
| EVM0015150 | LG13 | hypothetical protein VITISV_0  | -1.2481  | 0.008275 | not DE   | not DE  |
| EVM0009345 | LG13 | hypothetical protein VITISV_0  | not DE   | not DE   | not DE   | not DE  |
| EVM0004767 | LG13 | hypothetical protein VITISV_0  | not DE   | not DE   | not DE   | not DE  |
| EVM0018117 | LG13 | hypothetical protein VITISV_0  | not DE   | not DE   | not DE   | not DE  |
| EVM0005193 | LG13 | hypothetical protein VITISV_0  | not DE   | not DE   | not DE   | not DE  |
| EVM0018984 | LG13 | hypothetical protein VITISV_0  | not DE   | not DE   | not DE   | not DE  |
| EVM0021808 | LG13 | hypothetical protein VITISV_0  | not DE   | not DE   | not DE   | not DE  |
| EVM0022317 | LG13 | hypothetical protein VITISV_0  | 2.31163  | 0.001571 | not DE   | not DE  |
| EVM0014457 | LG13 | hypothetical protein ZEAMMB73  | not DE   | not DE   | not DE   | not DE  |
| EVM0019839 | LG13 | kinase family protein          | not DE   | not DE   | not DE   | not DE  |
| EVM0012031 | LG13 | laccase 7                      | not DE   | not DE   | not DE   | not DE  |
| EVM0001488 | LG13 | light-inducible protein atls1  | -2.05437 | 0.000457 | not DE   | not DE  |
| EVM0022355 | LG13 | lipid transfer protein         | not DE   | not DE   | not DE   | not DE  |
| EVM0004211 | LG13 | maturase                       | not DE   | not DE   | not DE   | not DE  |
| EVM0019554 | LG13 | multidrug resistance protein   | not DE   | not DE   | not DE   | not DE  |
| EVM0022891 | LG13 | multidrug resistance protein   | 1.465035 | 0.001915 | not DE   | not DE  |
| EVM0001136 | LG13 | nucleic acid binding protein,  | -2.23468 | 0.026427 | not DE   | not DE  |
| EVM0009813 | LG13 | pectinesterase family protein  | not DE   | not DE   | not DE   | not DE  |
| EVM0024338 | LG13 | phenylalanine ammonia-lyase    | not DE   | not DE   | not DE   | not DE  |
| EVM0014343 | LG13 | photosystem II protein V       | not DE   | not DE   | not DE   | not DE  |
| EVM0023830 | LG13 | plastocyanin-like domain-cont  | not DE   | not DE   | not DE   | not DE  |
| EVM0000864 | LG13 | polyubiquitin (ubq10)          | not DE   | not DE   | not DE   | not DE  |
| EVM0018380 | LG13 | putative auxin influx carrier  | not DE   | not DE   | not DE   | not DE  |
| EVM0000789 | LG13 | putative cadmium-transporting  | not DE   | not DE   | 2.464255 | 0.00568 |
| EVM0009965 | LG13 | putative chorismate mutase     | not DE   | not DE   | not DE   | not DE  |
| EVM0007150 | LG13 | putative pectate lyase 7       | not DE   | not DE   | not DE   | not DE  |
| EVM0016893 | LG13 | putative sodium-coupled neutri | not DE   | not DE   | not DE   | not DE  |
| EVM0017083 | LG13 | retrotransposon protein, puta  | not DE   | not DE   | not DE   | not DE  |
| EVM0010976 | LG13 | serine carboxypeptidase S10 f  | not DE   | not DE   | -1.38872 | 0.00042 |
| EVM0019833 | LG13 | small nuclear ribonucleoprote  | not DE   | not DE   | not DE   | not DE  |
| EVM0010821 | LG13 | srpk, putative                 | not DE   | not DE   | not DE   | not DE  |
| EVM0008915 | LG13 | subtilisin inhibitor 1, putat  | not DE   | not DE   | not DE   | not DE  |
| EVM0001295 | LG13 | subtilisin-like serine protea  | not DE   | not DE   | not DE   | not DE  |
| EVM0000156 | LG13 | transcription factor, putativ  | not DE   | not DE   | not DE   | not DE  |
| EVM0005761 | LG13 | ubiquitin                      | not DE   | not DE   | not DE   | not DE  |
| EVM0010835 | LG13 | ubiquitin-conjugating enzyme   | not DE   | not DE   | not DE   | not DE  |
| EVM0000378 | LG13 | unknown protein                | not DE   | not DE   | not DE   | not DE  |
| EVM0002395 | LG13 | unknown protein                | not DE   | not DE   | not DE   | not DE  |
| EVM0002784 | LG13 | unknown protein                | not DE   | not DE   | not DE   | not DE  |
| EVM0003099 | LG13 | unknown protein                | not DE   | not DE   | not DE   | not DE  |
| EVM0005076 | LG13 | unknown protein                | not DE   | not DE   | not DE   | not DE  |
| EVM0005535 | LG13 | unknown protein                | not DE   | not DE   | not DE   | not DE  |
| EVM0005555 | LG13 | unknown protein                | not DE   | not DE   | not DE   | not DE  |
| EVM0006239 | LG13 | unknown protein                | not DE   | not DE   | not DE   | not DE  |
| EVM0007124 | LG13 | unknown protein                | not DE   | not DE   | not DE   | not DE  |
| EVM0008367 | LG13 | unknown protein                | not DE   | not DE   | not DE   | not DE  |
| EVM0010400 | LG13 | unknown protein                | not DE   | not DE   | not DE   | not DE  |
| EVM0010717 | LG13 | unknown protein                | not DE   | not DE   | not DE   | not DE  |

|            |      |                                 |          |          |          |         |
|------------|------|---------------------------------|----------|----------|----------|---------|
| EVM0010767 | LG13 | unknown protein                 | not DE   | not DE   | not DE   | not DE  |
| EVM0011288 | LG13 | unknown protein                 | not DE   | not DE   | not DE   | not DE  |
| EVM0011403 | LG13 | unknown protein                 | not DE   | not DE   | not DE   | not DE  |
| EVM0012139 | LG13 | unknown protein                 | 2.258721 | 0.001342 | not DE   | not DE  |
| EVM0012466 | LG13 | unknown protein                 | not DE   | not DE   | not DE   | not DE  |
| EVM0013125 | LG13 | unknown protein                 | 5.39243  | 0.001004 | not DE   | not DE  |
| EVM0014408 | LG13 | unknown protein                 | not DE   | not DE   | not DE   | not DE  |
| EVM0014489 | LG13 | unknown protein                 | not DE   | not DE   | not DE   | not DE  |
| EVM0014639 | LG13 | unknown protein                 | not DE   | not DE   | not DE   | not DE  |
| EVM0014940 | LG13 | unknown protein                 | not DE   | not DE   | not DE   | not DE  |
| EVM0015479 | LG13 | unknown protein                 | not DE   | not DE   | not DE   | not DE  |
| EVM0015538 | LG13 | unknown protein                 | not DE   | not DE   | not DE   | not DE  |
| EVM0015914 | LG13 | unknown protein                 | not DE   | not DE   | not DE   | not DE  |
| EVM0016286 | LG13 | unknown protein                 | not DE   | not DE   | not DE   | not DE  |
| EVM0020292 | LG13 | unknown protein                 | not DE   | not DE   | not DE   | not DE  |
| EVM0021785 | LG13 | unknown protein                 | not DE   | not DE   | not DE   | not DE  |
| EVM0023232 | LG13 | unknown protein                 | not DE   | not DE   | not DE   | not DE  |
| EVM0023328 | LG13 | unknown protein                 | not DE   | not DE   | not DE   | not DE  |
| EVM0000102 | LG13 | unnamed protein product         | not DE   | not DE   | not DE   | not DE  |
| EVM0003110 | LG13 | unnamed protein product         | not DE   | not DE   | not DE   | not DE  |
| EVM0003354 | LG13 | unnamed protein product         | not DE   | not DE   | not DE   | not DE  |
| EVM0004118 | LG13 | unnamed protein product         | -4.01595 | 0.000749 | not DE   | not DE  |
| EVM0004847 | LG13 | unnamed protein product         | not DE   | not DE   | not DE   | not DE  |
| EVM0005853 | LG13 | unnamed protein product         | not DE   | not DE   | not DE   | not DE  |
| EVM0007408 | LG13 | unnamed protein product         | not DE   | not DE   | not DE   | not DE  |
| EVM0008886 | LG13 | unnamed protein product         | not DE   | not DE   | not DE   | not DE  |
| EVM0009557 | LG13 | unnamed protein product         | not DE   | not DE   | not DE   | not DE  |
| EVM0009991 | LG13 | unnamed protein product         | not DE   | not DE   | not DE   | not DE  |
| EVM0010744 | LG13 | unnamed protein product         | not DE   | not DE   | not DE   | not DE  |
| EVM0012533 | LG13 | unnamed protein product         | not DE   | not DE   | not DE   | not DE  |
| EVM0013078 | LG13 | unnamed protein product         | not DE   | not DE   | not DE   | not DE  |
| EVM0014633 | LG13 | unnamed protein product         | not DE   | not DE   | not DE   | not DE  |
| EVM0015077 | LG13 | unnamed protein product         | not DE   | not DE   | not DE   | not DE  |
| EVM0016124 | LG13 | unnamed protein product         | not DE   | not DE   | not DE   | not DE  |
| EVM0016520 | LG13 | unnamed protein product         | not DE   | not DE   | 1.306094 | 0.00176 |
| EVM0017468 | LG13 | unnamed protein product         | not DE   | not DE   | -1.12442 | 0.00022 |
| EVM0017960 | LG13 | unnamed protein product         | not DE   | not DE   | not DE   | not DE  |
| EVM0018605 | LG13 | unnamed protein product         | not DE   | not DE   | not DE   | not DE  |
| EVM0018973 | LG13 | unnamed protein product         | not DE   | not DE   | not DE   | not DE  |
| EVM0019700 | LG13 | unnamed protein product         | not DE   | not DE   | not DE   | not DE  |
| EVM0020523 | LG13 | unnamed protein product         | not DE   | not DE   | not DE   | not DE  |
| EVM0021215 | LG13 | unnamed protein product         | not DE   | not DE   | not DE   | not DE  |
| EVM0021460 | LG13 | unnamed protein product         | not DE   | not DE   | not DE   | not DE  |
| EVM0022882 | LG13 | unnamed protein product         | not DE   | not DE   | not DE   | not DE  |
| EVM0024142 | LG13 | unnamed protein product         | not DE   | not DE   | not DE   | not DE  |
| EVM0019313 | LG13 | zinc finger protein, putative   | not DE   | not DE   | not DE   | not DE  |
| EVM0011253 | LG13 | zinc/iron transporter, putative | not DE   | not DE   | 1.033925 | 0.00608 |
| EVM0018388 | LG13 | zinc/iron transporter, putative | not DE   | not DE   | not DE   | not DE  |
| EVM0000628 | LG14 | (-)-germacrene D synthase-like  | not DE   | not DE   | not DE   | not DE  |
| EVM0001066 | LG14 | (-)-germacrene D synthase-like  | not DE   | not DE   | not DE   | not DE  |
| EVM0002724 | LG14 | (-)-germacrene D synthase-like  | not DE   | not DE   | not DE   | not DE  |
| EVM0003806 | LG14 | (-)-germacrene D synthase-like  | not DE   | not DE   | not DE   | not DE  |
| EVM0008118 | LG14 | (-)-germacrene D synthase-like  | not DE   | not DE   | not DE   | not DE  |
| EVM0011126 | LG14 | (-)-germacrene D synthase-like  | not DE   | not DE   | not DE   | not DE  |

|            |      |                               |          |          |          |         |
|------------|------|-------------------------------|----------|----------|----------|---------|
| EVM0011613 | LG14 | (-)-germacrene D synthase-li  | not DE   | not DE   | not DE   | not DE  |
| EVM0013749 | LG14 | (-)-germacrene D synthase-li  | not DE   | not DE   | not DE   | not DE  |
| EVM0015763 | LG14 | (-)-germacrene D synthase-li  | not DE   | not DE   | not DE   | not DE  |
| EVM0000013 | LG14 | 11-oxo-beta-amyrin 30-oxidas  | not DE   | not DE   | not DE   | not DE  |
| EVM0023753 | LG14 | 11-oxo-beta-amyrin 30-oxidas  | not DE   | not DE   | not DE   | not DE  |
| EVM0011496 | LG14 | 26S proteasome non-ATPase re  | not DE   | not DE   | not DE   | not DE  |
| EVM0024008 | LG14 | 3-phosphoshikimate 1-carboxy  | not DE   | not DE   | not DE   | not DE  |
| EVM0014218 | LG14 | 40S ribosomal protein S2-3-l  | not DE   | not DE   | not DE   | not DE  |
| EVM0006508 | LG14 | 50S ribosomal protein L13, c  | not DE   | not DE   | not DE   | not DE  |
| EVM0009929 | LG14 | 54S ribosomal protein L39, m  | not DE   | not DE   | not DE   | not DE  |
| EVM0013464 | LG14 | 60S acidic ribosomal protein  | not DE   | not DE   | not DE   | not DE  |
| EVM0014009 | LG14 | 60S ribosomal protein L18a-2  | not DE   | not DE   | not DE   | not DE  |
| EVM0022229 | LG14 | 60S ribosomal protein L9-lik  | not DE   | not DE   | not DE   | not DE  |
| EVM0003103 | LG14 | ABC transporter C family mem  | not DE   | not DE   | not DE   | not DE  |
| EVM0006110 | LG14 | ABC transporter C family mem  | not DE   | not DE   | not DE   | not DE  |
| EVM0008937 | LG14 | ABC transporter C family mem  | not DE   | not DE   | -1.64103 | 0.04032 |
| EVM0009092 | LG14 | ABC transporter G family mem  | not DE   | not DE   | not DE   | not DE  |
| EVM0002003 | LG14 | ABC transporter G family mem  | not DE   | not DE   | not DE   | not DE  |
| EVM0019557 | LG14 | AP-5 complex subunit zeta-1-  | not DE   | not DE   | not DE   | not DE  |
| EVM0021445 | LG14 | ATP synthase gamma chain, ch  | not DE   | not DE   | not DE   | not DE  |
| EVM0014498 | LG14 | ATP-dependent DNA helicase 2  | not DE   | not DE   | not DE   | not DE  |
| EVM0005217 | LG14 | BES1/BZR1 homolog protein 4-  | not DE   | not DE   | not DE   | not DE  |
| EVM0014409 | LG14 | BTB/POZ domain-containing pr  | not DE   | not DE   | not DE   | not DE  |
| EVM0021649 | LG14 | C2 domain-containing protein  | not DE   | not DE   | not DE   | not DE  |
| EVM0012011 | LG14 | DDR GK domain-containing prot | not DE   | not DE   | not DE   | not DE  |
| EVM0014836 | LG14 | DNA mismatch repair protein   | not DE   | not DE   | not DE   | not DE  |
| EVM0020324 | LG14 | DNA polymerase zeta processi  | not DE   | not DE   | not DE   | not DE  |
| EVM0013691 | LG14 | DNA repair protein recA hom   | not DE   | not DE   | not DE   | not DE  |
| EVM0022430 | LG14 | DNA topoisomerase 1-like isc  | not DE   | not DE   | not DE   | not DE  |
| EVM0002826 | LG14 | DNA-binding protein BIN4-lik  | not DE   | not DE   | not DE   | not DE  |
| EVM0013739 | LG14 | E3 SUMO-protein ligase MMS21  | not DE   | not DE   | not DE   | not DE  |
| EVM0016408 | LG14 | E3 ubiquitin-protein ligase   | 1.635295 | 0.001419 | not DE   | not DE  |
| EVM0010979 | LG14 | F-box/LRR-repeat protein At3  | not DE   | not DE   | not DE   | not DE  |
| EVM0016098 | LG14 | F-box/LRR-repeat protein At3  | not DE   | not DE   | not DE   | not DE  |
| EVM0016111 | LG14 | F-box/kelch-repeat protein A  | not DE   | not DE   | not DE   | not DE  |
| EVM0010431 | LG14 | FHA domain-containing protei  | not DE   | not DE   | not DE   | not DE  |
| EVM0009841 | LG14 | G-type lectin S-receptor-lik  | not DE   | not DE   | not DE   | not DE  |
| EVM0012689 | LG14 | G-type lectin S-receptor-lik  | not DE   | not DE   | not DE   | not DE  |
| EVM0007896 | LG14 | G-type lectin S-receptor-lik  | not DE   | not DE   | not DE   | not DE  |
| EVM0023647 | LG14 | GPI-anchored protein LORELEI  | not DE   | not DE   | not DE   | not DE  |
| EVM0002232 | LG14 | KH domain-containing protein  | not DE   | not DE   | not DE   | not DE  |
| EVM0000837 | LG14 | LOW QUALITY PROTEIN: salutar  | not DE   | not DE   | not DE   | not DE  |
| EVM0005538 | LG14 | LOW QUALITY PROTEIN: unchara  | not DE   | not DE   | not DE   | not DE  |
| EVM0019674 | LG14 | LRR receptor-like serine/thr  | not DE   | not DE   | not DE   | not DE  |
| EVM0006805 | LG14 | MADS-box transcription facto  | not DE   | not DE   | not DE   | not DE  |
| EVM0015761 | LG14 | NAC domain-containing protei  | not DE   | not DE   | not DE   | not DE  |
| EVM0005590 | LG14 | NAD-dependent protein deacet  | -1.33853 | 0.008802 | -1.03974 | 0.04742 |
| EVM0013906 | LG14 | PAP-specific phosphatase HAL  | not DE   | not DE   | not DE   | not DE  |
| EVM0000536 | LG14 | PP2A regulatory subunit TAP4  | not DE   | not DE   | not DE   | not DE  |
| EVM0000280 | LG14 | PRA1 family protein H-like    | not DE   | not DE   | not DE   | not DE  |
| EVM0003502 | LG14 | RING finger protein 148-like  | not DE   | not DE   | not DE   | not DE  |
| EVM0010544 | LG14 | RING finger protein 148-like  | not DE   | not DE   | not DE   | not DE  |
| EVM0016218 | LG14 | RING finger protein 148-like  | not DE   | not DE   | not DE   | not DE  |
| EVM0023791 | LG14 | RING finger protein 148-like  | not DE   | not DE   | not DE   | not DE  |

|            |      |                               |          |          |          |        |
|------------|------|-------------------------------|----------|----------|----------|--------|
| EVM0024087 | LG14 | RING finger protein 148-like  | not DE   | not DE   | not DE   | not DE |
| EVM0015407 | LG14 | RNA polymerase II degradatio  | not DE   | not DE   | not DE   | not DE |
| EVM0020735 | LG14 | TPR repeat-containing thiore  | not DE   | not DE   | not DE   | not DE |
| EVM0023048 | LG14 | UBP1-associated protein 2C    | not DE   | not DE   | not DE   | not DE |
| EVM0009150 | LG14 | UDP-glycosyltransferase 83A   | not DE   | not DE   | not DE   | not DE |
| EVM0006820 | LG14 | UNC93-like protein 1          | not DE   | not DE   | -3.19575 | #####  |
| EVM0003262 | LG14 | V-type proton ATPase subunit  | not DE   | not DE   | not DE   | not DE |
| EVM0006490 | LG14 | WAT1-related protein Atlg093  | not DE   | not DE   | not DE   | not DE |
| EVM0013854 | LG14 | WD repeat-containing protein  | not DE   | not DE   | not DE   | not DE |
| EVM0023497 | LG14 | WD repeat-containing protein  | not DE   | not DE   | not DE   | not DE |
| EVM0001091 | LG14 | WD repeat-containing protein  | not DE   | not DE   | not DE   | not DE |
| EVM0018331 | LG14 | WD repeat-containing protein  | not DE   | not DE   | not DE   | not DE |
| EVM0022134 | LG14 | WD repeat-containing protein  | not DE   | not DE   | not DE   | not DE |
| EVM0001862 | LG14 | actin cytoskeleton-regulator  | not DE   | not DE   | not DE   | not DE |
| EVM0011982 | LG14 | ankyrin repeat-containing pr  | not DE   | not DE   | not DE   | not DE |
| EVM0007322 | LG14 | ankyrin repeat-containing pr  | not DE   | not DE   | not DE   | not DE |
| EVM0017354 | LG14 | ankyrin repeat-containing pr  | not DE   | not DE   | not DE   | not DE |
| EVM0021901 | LG14 | ankyrin-3-like                | not DE   | not DE   | not DE   | not DE |
| EVM0000123 | LG14 | aspartic proteinase CDR1-lik  | not DE   | not DE   | not DE   | not DE |
| EVM0000681 | LG14 | aspartic proteinase CDR1-lik  | not DE   | not DE   | not DE   | not DE |
| EVM0004660 | LG14 | aspartic proteinase CDR1-lik  | not DE   | not DE   | not DE   | not DE |
| EVM0020780 | LG14 | aspartic proteinase CDR1-lik  | not DE   | not DE   | not DE   | not DE |
| EVM0023399 | LG14 | aspartic proteinase CDR1-lik  | not DE   | not DE   | not DE   | not DE |
| EVM0007248 | LG14 | aspartic proteinase nepenthe  | not DE   | not DE   | not DE   | not DE |
| EVM0007938 | LG14 | aspartic proteinase nepenthe  | not DE   | not DE   | not DE   | not DE |
| EVM0020469 | LG14 | aspartic proteinase nepenthe  | not DE   | not DE   | not DE   | not DE |
| EVM0008090 | LG14 | brassinosteroid LRR receptor  | not DE   | not DE   | not DE   | not DE |
| EVM0016364 | LG14 | brassinosteroid LRR receptor  | not DE   | not DE   | not DE   | not DE |
| EVM0021039 | LG14 | brassinosteroid LRR receptor  | not DE   | not DE   | not DE   | not DE |
| EVM0023549 | LG14 | brassinosteroid LRR receptor  | not DE   | not DE   | not DE   | not DE |
| EVM0009610 | LG14 | calcineurin B-like protein 3  | not DE   | not DE   | not DE   | not DE |
| EVM0019880 | LG14 | calcineurin B-like protein 7  | not DE   | not DE   | not DE   | not DE |
| EVM0005948 | LG14 | casbene synthase, chloroplas  | not DE   | not DE   | not DE   | not DE |
| EVM0008225 | LG14 | casbene synthase, chloroplas  | not DE   | not DE   | not DE   | not DE |
| EVM0010352 | LG14 | casbene synthase, chloroplas  | not DE   | not DE   | not DE   | not DE |
| EVM0011638 | LG14 | casbene synthase, chloroplas  | not DE   | not DE   | not DE   | not DE |
| EVM0018781 | LG14 | casbene synthase, chloroplas  | not DE   | not DE   | not DE   | not DE |
| EVM0008065 | LG14 | cellulose synthase-like prot  | not DE   | not DE   | not DE   | not DE |
| EVM0011462 | LG14 | cellulose synthase-like prot  | not DE   | not DE   | not DE   | not DE |
| EVM0021097 | LG14 | cellulose synthase-like prot  | not DE   | not DE   | not DE   | not DE |
| EVM0020966 | LG14 | chaperone protein dnaJ 11, c  | not DE   | not DE   | not DE   | not DE |
| EVM0006958 | LG14 | cleavage and polyadenylation  | not DE   | not DE   | not DE   | not DE |
| EVM0012664 | LG14 | coiled-coil domain-containing | not DE   | not DE   | not DE   | not DE |
| EVM0005120 | LG14 | condensin complex subunit 2-  | not DE   | not DE   | not DE   | not DE |
| EVM0007049 | LG14 | cysteine synthase 2-like isc  | not DE   | not DE   | not DE   | not DE |
| EVM0008376 | LG14 | cytochrome P450 71D11-like    | not DE   | not DE   | not DE   | not DE |
| EVM0014217 | LG14 | cytochrome P450 71D11-like i  | not DE   | not DE   | not DE   | not DE |
| EVM0007735 | LG14 | cytochrome P450 71D9-like     | not DE   | not DE   | not DE   | not DE |
| EVM0011857 | LG14 | cytochrome P450 71D9-like     | not DE   | not DE   | not DE   | not DE |
| EVM0014750 | LG14 | cytochrome P450 71D9-like     | not DE   | not DE   | not DE   | not DE |
| EVM0019926 | LG14 | cytochrome P450 71D9-like     | not DE   | not DE   | not DE   | not DE |
| EVM0022603 | LG14 | cytochrome P450 71D9-like     | -1.91498 | 0.031508 | not DE   | not DE |
| EVM0006948 | LG14 | cytochrome c oxidase assembl  | not DE   | not DE   | not DE   | not DE |
| EVM0004342 | LG14 | cytochrome c-type biogenesis  | not DE   | not DE   | not DE   | not DE |

|            |      |                               |          |          |          |         |
|------------|------|-------------------------------|----------|----------|----------|---------|
| EVM0016734 | LG14 | diaminopimelate epimerase, cy | not DE   | not DE   | not DE   | not DE  |
| EVM0008100 | LG14 | dihydrolipoyllysine-residue   | not DE   | not DE   | not DE   | not DE  |
| EVM0007782 | LG14 | disease resistance protein A  | not DE   | not DE   | not DE   | not DE  |
| EVM0008523 | LG14 | dof zinc finger protein DOF4  | not DE   | not DE   | not DE   | not DE  |
| EVM0005840 | LG14 | double-strand break repair p  | not DE   | not DE   | not DE   | not DE  |
| EVM0017864 | LG14 | dynein light chain 2, cytopl  | not DE   | not DE   | not DE   | not DE  |
| EVM0011311 | LG14 | epidermis-specific secreted   | not DE   | not DE   | -3.38815 | 0.00624 |
| EVM0013669 | LG14 | epidermis-specific secreted   | not DE   | not DE   | -1.81244 | 0.04145 |
| EVM0018965 | LG14 | fructose-bisphosphate aldola  | -2.26154 | 0.03528  | not DE   | not DE  |
| EVM0000792 | LG14 | germacrene-D synthase-like    | not DE   | not DE   | not DE   | not DE  |
| EVM0014806 | LG14 | glucose-6-phosphate/phosphat  | not DE   | not DE   | not DE   | not DE  |
| EVM0022063 | LG14 | glutamate receptor 2.5-like   | not DE   | not DE   | not DE   | not DE  |
| EVM0012034 | LG14 | glutamate receptor 2.7-like   | not DE   | not DE   | not DE   | not DE  |
| EVM0001547 | LG14 | glutathione S-transferase U1  | 1.097227 | 0.010894 | not DE   | not DE  |
| EVM0006281 | LG14 | glutathione S-transferase U1  | 2.760046 | 7.42E-05 | 1.87995  | 0.00047 |
| EVM0019155 | LG14 | glutathione S-transferase U1  | not DE   | not DE   | not DE   | not DE  |
| EVM0009695 | LG14 | glycine-rich RNA-binding pro  | not DE   | not DE   | not DE   | not DE  |
| EVM0020167 | LG14 | glycine-rich RNA-binding pro  | not DE   | not DE   | not DE   | not DE  |
| EVM0022995 | LG14 | glycine-rich RNA-binding pro  | not DE   | not DE   | not DE   | not DE  |
| EVM0009889 | LG14 | grpE protein homolog, mitoch  | not DE   | not DE   | not DE   | not DE  |
| EVM0012067 | LG14 | heat shock protein 90-2       | -1.31739 | 0.013418 | -1.64893 | #####   |
| EVM0018451 | LG14 | heme-binding protein 2-like   | not DE   | not DE   | not DE   | not DE  |
| EVM0013376 | LG14 | heterogeneous nuclear ribonu  | not DE   | not DE   | not DE   | not DE  |
| EVM0020053 | LG14 | histone-lysine N-methyltrans  | not DE   | not DE   | not DE   | not DE  |
| EVM0022306 | LG14 | histone-lysine N-methyltrans  | not DE   | not DE   | not DE   | not DE  |
| EVM0015591 | LG14 | homeobox-leucine zipper prot  | not DE   | not DE   | not DE   | not DE  |
| EVM0015229 | LG14 | homogentisate 1,2-dioxygenas  | not DE   | not DE   | not DE   | not DE  |
| EVM0021540 | LG14 | homogentisate 1,2-dioxygenas  | not DE   | not DE   | not DE   | not DE  |
| EVM0014919 | LG14 | indole-3-acetate O-methyltra  | not DE   | not DE   | not DE   | not DE  |
| EVM0009905 | LG14 | inner centromere protein-lik  | not DE   | not DE   | not DE   | not DE  |
| EVM0020139 | LG14 | inner centromere protein-lik  | not DE   | not DE   | not DE   | not DE  |
| EVM0010745 | LG14 | interactor of constitutive a  | not DE   | not DE   | not DE   | not DE  |
| EVM0013333 | LG14 | kinesin-3-like isoform X1     | not DE   | not DE   | not DE   | not DE  |
| EVM0010519 | LG14 | kinesin-like protein KIFC3-l  | not DE   | not DE   | not DE   | not DE  |
| EVM0010711 | LG14 | kinesin-like protein KIFC3-l  | not DE   | not DE   | not DE   | not DE  |
| EVM0020641 | LG14 | kinesin-like protein KIN12B-  | not DE   | not DE   | not DE   | not DE  |
| EVM0019725 | LG14 | leucine-rich repeat extensin  | not DE   | not DE   | not DE   | not DE  |
| EVM0005702 | LG14 | leucine-rich repeat receptor  | not DE   | not DE   | not DE   | not DE  |
| EVM0003283 | LG14 | luminal-binding protein 5     | -2.56918 | 0.002797 | -3.43565 | #####   |
| EVM0018862 | LG14 | malate dehydrogenase, mitoch  | not DE   | not DE   | not DE   | not DE  |
| EVM0015473 | LG14 | mechanosensitive ion channel  | not DE   | not DE   | not DE   | not DE  |
| EVM0017881 | LG14 | metal-nicotianamine transpor  | -2.34852 | 4.01E-07 | not DE   | not DE  |
| EVM0020505 | LG14 | microtubule-associated prote  | not DE   | not DE   | not DE   | not DE  |
| EVM0012592 | LG14 | mitochondrial import inner m  | not DE   | not DE   | not DE   | not DE  |
| EVM0024503 | LG14 | mitogen-activated protein kin | not DE   | not DE   | not DE   | not DE  |
| EVM0009977 | LG14 | multi-protein-bridging factor | not DE   | not DE   | not DE   | not DE  |
| EVM0016592 | LG14 | myb-related protein 330-like  | not DE   | not DE   | not DE   | not DE  |
| EVM0014565 | LG14 | nascent polypeptide-associat  | not DE   | not DE   | not DE   | not DE  |
| EVM0023979 | LG14 | nephrocystin-3-like           | not DE   | not DE   | not DE   | not DE  |
| EVM0011252 | LG14 | obg-like ATPase 1-like isof   | not DE   | not DE   | not DE   | not DE  |
| EVM0000161 | LG14 | oligopeptide transporter 1-l  | not DE   | not DE   | not DE   | not DE  |
| EVM0003609 | LG14 | oligopeptide transporter 1-l  | not DE   | not DE   | not DE   | not DE  |
| EVM0007611 | LG14 | oligopeptide transporter 1-l  | not DE   | not DE   | not DE   | not DE  |
| EVM0009156 | LG14 | oligopeptide transporter 1-l  | not DE   | not DE   | not DE   | not DE  |



|            |      |                               |          |          |          |         |
|------------|------|-------------------------------|----------|----------|----------|---------|
| EVM0016301 | LG14 | oligopeptide transporter 1-l  | not DE   | not DE   | not DE   | not DE  |
| EVM0021827 | LG14 | oligopeptide transporter 1-l  | not DE   | not DE   | not DE   | not DE  |
| EVM0023088 | LG14 | oligopeptide transporter 1-l  | not DE   | not DE   | not DE   | not DE  |
| EVM0008746 | LG14 | organic cation/carnitine tran | not DE   | not DE   | not DE   | not DE  |
| EVM0000083 | LG14 | pentatricopeptide repeat-con  | not DE   | not DE   | not DE   | not DE  |
| EVM0003248 | LG14 | pentatricopeptide repeat-con  | not DE   | not DE   | not DE   | not DE  |
| EVM0006213 | LG14 | pentatricopeptide repeat-con  | not DE   | not DE   | not DE   | not DE  |
| EVM0015541 | LG14 | pentatricopeptide repeat-con  | 2.502104 | 0.002418 | not DE   | not DE  |
| EVM0018286 | LG14 | pentatricopeptide repeat-con  | not DE   | not DE   | not DE   | not DE  |
| EVM0013870 | LG14 | pentatricopeptide repeat-con  | not DE   | not DE   | not DE   | not DE  |
| EVM0014635 | LG14 | pentatricopeptide repeat-con  | 1.065995 | 0.027748 | -1.32641 | 0.00469 |
| EVM0021546 | LG14 | pentatricopeptide repeat-con  | not DE   | not DE   | not DE   | not DE  |
| EVM0002295 | LG14 | pentatricopeptide repeat-con  | not DE   | not DE   | not DE   | not DE  |
| EVM0000865 | LG14 | peptide-N4-(N-acetyl-beta-gl  | not DE   | not DE   | not DE   | not DE  |
| EVM0009179 | LG14 | peptide-N4-(N-acetyl-beta-gl  | not DE   | not DE   | not DE   | not DE  |
| EVM0019263 | LG14 | peptide-N4-(N-acetyl-beta-gl  | not DE   | not DE   | not DE   | not DE  |
| EVM0011125 | LG14 | peptidyl-prolyl cis-trans is  | not DE   | not DE   | not DE   | not DE  |
| EVM0023538 | LG14 | peptidyl-prolyl cis-trans is  | not DE   | not DE   | 1.209734 | 0.03509 |
| EVM0016698 | LG14 | peroxisome biogenesis protei  | not DE   | not DE   | not DE   | not DE  |
| EVM0000928 | LG14 | persulfide dioxygenase ETHE1  | not DE   | not DE   | not DE   | not DE  |
| EVM0001486 | LG14 | persulfide dioxygenase ETHE1  | not DE   | not DE   | not DE   | not DE  |
| EVM0016518 | LG14 | phosphatidate cytidyltrans    | not DE   | not DE   | not DE   | not DE  |
| EVM0004246 | LG14 | phosphatidylinositol 4-kinas  | not DE   | not DE   | not DE   | not DE  |
| EVM0002928 | LG14 | phosphoenolpyruvate carboxyl  | not DE   | not DE   | not DE   | not DE  |
| EVM0014099 | LG14 | photosystem I reaction cente  | -1.56928 | 0.005234 | not DE   | not DE  |
| EVM0004313 | LG14 | photosystem II 10 kDa polype  | not DE   | not DE   | 1.888647 | 0.00811 |
| EVM0014603 | LG14 | photosystem II 10 kDa polype  | not DE   | not DE   | not DE   | not DE  |
| EVM0023332 | LG14 | pirin-like protein            | not DE   | not DE   | not DE   | not DE  |
| EVM0002951 | LG14 | poly(A)-specific ribonucleas  | not DE   | not DE   | not DE   | not DE  |
| EVM0011071 | LG14 | polycomb group protein FERTI  | not DE   | not DE   | not DE   | not DE  |
| EVM0011153 | LG14 | polycomb group protein FERTI  | not DE   | not DE   | not DE   | not DE  |
| EVM0015866 | LG14 | polynucleotide 3'&apos;-phosp | not DE   | not DE   | not DE   | not DE  |
| EVM0019540 | LG14 | polynucleotide 3'&apos;-phosp | not DE   | not DE   | not DE   | not DE  |
| EVM0008577 | LG14 | premnaspirodiene oxygenase-l  | not DE   | not DE   | not DE   | not DE  |
| EVM0010335 | LG14 | premnaspirodiene oxygenase-l  | not DE   | not DE   | not DE   | not DE  |
| EVM0012709 | LG14 | premnaspirodiene oxygenase-l  | not DE   | not DE   | not DE   | not DE  |
| EVM0013934 | LG14 | premnaspirodiene oxygenase-l  | not DE   | not DE   | not DE   | not DE  |
| EVM0007516 | LG14 | probable ADP-ribosylation fa  | not DE   | not DE   | not DE   | not DE  |
| EVM0019020 | LG14 | probable BOI-related E3 ubiq  | -2.6802  | 0.000495 | not DE   | not DE  |
| EVM0015862 | LG14 | probable E3 ubiquitin-protein | not DE   | not DE   | not DE   | not DE  |
| EVM0014018 | LG14 | probable E3 ubiquitin-protein | not DE   | not DE   | not DE   | not DE  |
| EVM0000773 | LG14 | probable LRR receptor-like s  | not DE   | not DE   | -1.2792  | 0.04655 |
| EVM0019871 | LG14 | probable LRR receptor-like s  | not DE   | not DE   | -1.15068 | 0.00315 |
| EVM0016217 | LG14 | probable LRR receptor-like s  | not DE   | not DE   | not DE   | not DE  |
| EVM0014306 | LG14 | probable LRR receptor-like s  | not DE   | not DE   | not DE   | not DE  |
| EVM0008296 | LG14 | probable LRR receptor-like s  | not DE   | not DE   | not DE   | not DE  |
| EVM0014166 | LG14 | probable WRKY transcription   | not DE   | not DE   | not DE   | not DE  |
| EVM0017304 | LG14 | probable WRKY transcription   | not DE   | not DE   | not DE   | not DE  |
| EVM0017597 | LG14 | probable amino acid permease  | 2.744063 | 0.015108 | not DE   | not DE  |
| EVM0000011 | LG14 | probable calcium-binding pro  | not DE   | not DE   | not DE   | not DE  |
| EVM0007204 | LG14 | probable disease resistance   | not DE   | not DE   | not DE   | not DE  |
| EVM0020624 | LG14 | probable disease resistance   | not DE   | not DE   | not DE   | not DE  |
| EVM0013085 | LG14 | probable galactinol--sucrose  | 1.802581 | 0.014785 | not DE   | not DE  |
| EVM0008257 | LG14 | probable long-chain-alcohol   | not DE   | not DE   | not DE   | not DE  |

|            |      |                              |          |          |          |         |
|------------|------|------------------------------|----------|----------|----------|---------|
| EVM0021409 | LG14 | probable protein phosphatase | not DE   | not DE   | not DE   | not DE  |
| EVM0014900 | LG14 | probable ribokinase-like     | not DE   | not DE   | not DE   | not DE  |
| EVM0018604 | LG14 | probable ribosome biogenesis | not DE   | not DE   | not DE   | not DE  |
| EVM0023872 | LG14 | proline synthase co-transcri | not DE   | not DE   | not DE   | not DE  |
| EVM0016733 | LG14 | protein CUP-SHAPED COTYLEDON | not DE   | not DE   | not DE   | not DE  |
| EVM0009055 | LG14 | protein Iojap, chloroplastic | not DE   | not DE   | not DE   | not DE  |
| EVM0004471 | LG14 | protein LHCP TRANSLOCATION D | not DE   | not DE   | not DE   | not DE  |
| EVM0010412 | LG14 | protein NDR1-like            | not DE   | not DE   | not DE   | not DE  |
| EVM0012906 | LG14 | protein NDR1-like            | not DE   | not DE   | not DE   | not DE  |
| EVM0016442 | LG14 | protein NDR1-like            | not DE   | not DE   | not DE   | not DE  |
| EVM0007803 | LG14 | protein ROOT PRIMORDIUM DEFE | not DE   | not DE   | not DE   | not DE  |
| EVM0023745 | LG14 | protein RRNAD1-like          | not DE   | not DE   | not DE   | not DE  |
| EVM0016008 | LG14 | protein SPA1-RELATED 3-like  | not DE   | not DE   | not DE   | not DE  |
| EVM0022028 | LG14 | protein YLS7-like            | not DE   | not DE   | not DE   | not DE  |
| EVM0020231 | LG14 | protein YLS9                 | not DE   | not DE   | not DE   | not DE  |
| EVM0005810 | LG14 | protein kinase G11A-like iso | not DE   | not DE   | not DE   | not DE  |
| EVM0010815 | LG14 | protein kinase PVPK-1-like   | not DE   | not DE   | not DE   | not DE  |
| EVM0008780 | LG14 | protein translation factor S | not DE   | not DE   | not DE   | not DE  |
| EVM0021099 | LG14 | protein translation factor S | not DE   | not DE   | not DE   | not DE  |
| EVM0016454 | LG14 | protein translation factor S | not DE   | not DE   | not DE   | not DE  |
| EVM0004769 | LG14 | protein transport protein Se | not DE   | not DE   | -1.44974 | 0.00616 |
| EVM0018706 | LG14 | proteinaceous RNase P 1, chl | not DE   | not DE   | not DE   | not DE  |
| EVM0002774 | LG14 | putative F-box/FBD/LRR-repea | not DE   | not DE   | not DE   | not DE  |
| EVM0008557 | LG14 | putative F-box/FBD/LRR-repea | not DE   | not DE   | not DE   | not DE  |
| EVM0014632 | LG14 | putative F-box/FBD/LRR-repea | not DE   | not DE   | not DE   | not DE  |
| EVM0017823 | LG14 | putative F-box/FBD/LRR-repea | not DE   | not DE   | not DE   | not DE  |
| EVM0023667 | LG14 | putative F-box/FBD/LRR-repea | not DE   | not DE   | not DE   | not DE  |
| EVM0003537 | LG14 | putative F-box/LRR-repeat pr | not DE   | not DE   | not DE   | not DE  |
| EVM0023511 | LG14 | putative F-box/LRR-repeat pr | not DE   | not DE   | not DE   | not DE  |
| EVM0013511 | LG14 | putative F-box/LRR-repeat pr | not DE   | not DE   | not DE   | not DE  |
| EVM0015093 | LG14 | putative F-box/LRR-repeat pr | not DE   | not DE   | not DE   | not DE  |
| EVM0016102 | LG14 | putative RING-H2 finger prot | not DE   | not DE   | not DE   | not DE  |
| EVM0015092 | LG14 | putative beta-glucosidase 41 | -1.19107 | 0.031978 | not DE   | not DE  |
| EVM0010864 | LG14 | putative disease resistance  | not DE   | not DE   | not DE   | not DE  |
| EVM0019221 | LG14 | putative disease resistance  | not DE   | not DE   | not DE   | not DE  |
| EVM0002363 | LG14 | putative disease resistance  | not DE   | not DE   | not DE   | not DE  |
| EVM0005128 | LG14 | putative disease resistance  | not DE   | not DE   | not DE   | not DE  |
| EVM0007825 | LG14 | putative disease resistance  | not DE   | not DE   | not DE   | not DE  |
| EVM0008751 | LG14 | putative disease resistance  | not DE   | not DE   | -1.5183  | 0.00024 |
| EVM0004593 | LG14 | putative disease resistance  | not DE   | not DE   | not DE   | not DE  |
| EVM0009077 | LG14 | putative disease resistance  | not DE   | not DE   | not DE   | not DE  |
| EVM0010192 | LG14 | putative disease resistance  | not DE   | not DE   | not DE   | not DE  |
| EVM0022926 | LG14 | putative disease resistance  | not DE   | not DE   | not DE   | not DE  |
| EVM0024058 | LG14 | putative disease resistance  | not DE   | not DE   | not DE   | not DE  |
| EVM0002252 | LG14 | putative disease resistance  | not DE   | not DE   | not DE   | not DE  |
| EVM0009287 | LG14 | putative disease resistance  | not DE   | not DE   | not DE   | not DE  |
| EVM0015184 | LG14 | putative disease resistance  | not DE   | not DE   | not DE   | not DE  |
| EVM0000201 | LG14 | putative disease resistance  | not DE   | not DE   | not DE   | not DE  |
| EVM0004505 | LG14 | putative disease resistance  | not DE   | not DE   | not DE   | not DE  |
| EVM0012255 | LG14 | putative disease resistance  | not DE   | not DE   | not DE   | not DE  |
| EVM0016288 | LG14 | putative exosome complex com | not DE   | not DE   | not DE   | not DE  |
| EVM0017988 | LG14 | putative exosome complex com | not DE   | not DE   | not DE   | not DE  |
| EVM0002511 | LG14 | putative lipid-transfer prot | not DE   | not DE   | not DE   | not DE  |
| EVM0020473 | LG14 | putative peptide/nitrate tra | not DE   | not DE   | not DE   | not DE  |

|            |      |                               |          |          |          |         |
|------------|------|-------------------------------|----------|----------|----------|---------|
| EVM0002999 | LG14 | putative wall-associated rec  | not DE   | not DE   | not DE   | not DE  |
| EVM0015178 | LG14 | pyridoxal reductase, chlorop  | not DE   | not DE   | not DE   | not DE  |
| EVM0006824 | LG14 | rab3 GTPase-activating prote  | not DE   | not DE   | not DE   | not DE  |
| EVM0024565 | LG14 | rab3 GTPase-activating prote  | not DE   | not DE   | not DE   | not DE  |
| EVM0002432 | LG14 | ran-binding protein 10-like   | not DE   | not DE   | not DE   | not DE  |
| EVM0015302 | LG14 | ran-binding protein 10-like   | not DE   | not DE   | not DE   | not DE  |
| EVM0013718 | LG14 | ras-related protein RAB1f-1   | not DE   | not DE   | not DE   | not DE  |
| EVM0017348 | LG14 | ras-related protein RAB1f-1   | not DE   | not DE   | not DE   | not DE  |
| EVM0002384 | LG14 | receptor-like protein 12-lik  | not DE   | not DE   | not DE   | not DE  |
| EVM0016674 | LG14 | receptor-like protein 12-lik  | not DE   | not DE   | not DE   | not DE  |
| EVM0017474 | LG14 | receptor-like protein 12-lik  | not DE   | not DE   | not DE   | not DE  |
| EVM0021664 | LG14 | receptor-like protein 12-lik  | not DE   | not DE   | not DE   | not DE  |
| EVM0006947 | LG14 | reticulon-4-interacting prot  | not DE   | not DE   | not DE   | not DE  |
| EVM0014119 | LG14 | rhodanese-like domain-contain | not DE   | not DE   | not DE   | not DE  |
| EVM0024202 | LG14 | scarecrow-like protein 5-lik  | not DE   | not DE   | not DE   | not DE  |
| EVM0000135 | LG14 | secologanin synthase-like     | not DE   | not DE   | not DE   | not DE  |
| EVM0003167 | LG14 | secologanin synthase-like     | not DE   | not DE   | not DE   | not DE  |
| EVM0010363 | LG14 | secologanin synthase-like     | not DE   | not DE   | not DE   | not DE  |
| EVM0015722 | LG14 | septum-promoting GTP-binding  | 3.604045 | 0.002425 | not DE   | not DE  |
| EVM0018358 | LG14 | serine/arginine-rich splicing | not DE   | not DE   | not DE   | not DE  |
| EVM0012088 | LG14 | serine/threonine-protein kin  | not DE   | not DE   | not DE   | not DE  |
| EVM0024667 | LG14 | serine/threonine-protein kin  | not DE   | not DE   | not DE   | not DE  |
| EVM0017787 | LG14 | sodium/hydrogen exchanger 4-  | not DE   | not DE   | not DE   | not DE  |
| EVM0003787 | LG14 | splicing regulatory glutamin  | not DE   | not DE   | not DE   | not DE  |
| EVM0017237 | LG14 | squalene monooxygenase        | not DE   | not DE   | not DE   | not DE  |
| EVM0018674 | LG14 | squalene monooxygenase        | not DE   | not DE   | not DE   | not DE  |
| EVM0000442 | LG14 | starch synthase 1, chloropl   | not DE   | not DE   | not DE   | not DE  |
| EVM0002371 | LG14 | stem-specific protein TSJT1-  | not DE   | not DE   | not DE   | not DE  |
| EVM0013209 | LG14 | stem-specific protein TSJT1-  | not DE   | not DE   | not DE   | not DE  |
| EVM0004821 | LG14 | structural maintenance of ch  | not DE   | not DE   | not DE   | not DE  |
| EVM0009191 | LG14 | sufE-like protein, chloropl   | not DE   | not DE   | not DE   | not DE  |
| EVM0016940 | LG14 | suppressor protein SRP40-lik  | not DE   | not DE   | not DE   | not DE  |
| EVM0019598 | LG14 | syntaxin-51-like              | not DE   | not DE   | not DE   | not DE  |
| EVM0005977 | LG14 | tRNA dimethylallyltransferas  | not DE   | not DE   | not DE   | not DE  |
| EVM0010591 | LG14 | thioredoxin M4, chloroplasti  | not DE   | not DE   | not DE   | not DE  |
| EVM0019296 | LG14 | titin isoform X1              | not DE   | not DE   | not DE   | not DE  |
| EVM0002253 | LG14 | transcription factor GTE4-li  | not DE   | not DE   | not DE   | not DE  |
| EVM0004676 | LG14 | transcription factor ILR3     | not DE   | not DE   | not DE   | not DE  |
| EVM0008990 | LG14 | translation initiation facto  | not DE   | not DE   | not DE   | not DE  |
| EVM0014024 | LG14 | transmembrane emp24 domain-c  | not DE   | not DE   | not DE   | not DE  |
| EVM0012816 | LG14 | transmembrane protein 184C-l  | not DE   | not DE   | not DE   | not DE  |
| EVM0021331 | LG14 | ubiquitin carboxyl-terminal   | not DE   | not DE   | not DE   | not DE  |
| EVM0014766 | LG14 | ubiquitin carboxyl-terminal   | not DE   | not DE   | not DE   | not DE  |
| EVM0020484 | LG14 | uncharacterized WD repeat-co  | not DE   | not DE   | not DE   | not DE  |
| EVM0013795 | LG14 | uncharacterized exonuclease   | not DE   | not DE   | not DE   | not DE  |
| EVM0004087 | LG14 | uncharacterized membrane pro  | not DE   | not DE   | not DE   | not DE  |
| EVM0014589 | LG14 | uncharacterized protein At4g  | not DE   | not DE   | 1.782863 | 0.03331 |
| EVM0000294 | LG14 | uncharacterized protein At4g  | not DE   | not DE   | not DE   | not DE  |
| EVM0002653 | LG14 | uncharacterized protein DDB_  | not DE   | not DE   | not DE   | not DE  |
| EVM0009743 | LG14 | uncharacterized protein LOC1  | not DE   | not DE   | not DE   | not DE  |
| EVM0005890 | LG14 | uncharacterized protein LOC1  | not DE   | not DE   | not DE   | not DE  |
| EVM0014203 | LG14 | uncharacterized protein LOC1  | not DE   | not DE   | 1.267793 | 0.00134 |
| EVM0019506 | LG14 | uncharacterized protein LOC1  | not DE   | not DE   | not DE   | not DE  |
| EVM0013989 | LG14 | uncharacterized protein LOC1  | not DE   | not DE   | not DE   | not DE  |

|            |      |                              |          |          |          |         |
|------------|------|------------------------------|----------|----------|----------|---------|
| EVM0002835 | LG14 | uncharacterized protein LOC1 | not DE   | not DE   | not DE   | not DE  |
| EVM0020308 | LG14 | uncharacterized protein LOC1 | not DE   | not DE   | not DE   | not DE  |
| EVM0002454 | LG14 | uncharacterized protein LOC1 | not DE   | not DE   | not DE   | not DE  |
| EVM0021383 | LG14 | uncharacterized protein LOC1 | not DE   | not DE   | not DE   | not DE  |
| EVM0007577 | LG14 | uncharacterized protein LOC1 | not DE   | not DE   | not DE   | not DE  |
| EVM0024210 | LG14 | uncharacterized protein LOC1 | not DE   | not DE   | not DE   | not DE  |
| EVM0023708 | LG14 | uncharacterized protein LOC1 | not DE   | not DE   | not DE   | not DE  |
| EVM0008922 | LG14 | uncharacterized protein LOC1 | not DE   | not DE   | not DE   | not DE  |
| EVM0011744 | LG14 | uncharacterized protein LOC1 | not DE   | not DE   | not DE   | not DE  |
| EVM0013010 | LG14 | uncharacterized protein LOC1 | not DE   | not DE   | not DE   | not DE  |
| EVM0009016 | LG14 | uncharacterized protein LOC1 | not DE   | not DE   | not DE   | not DE  |
| EVM0012909 | LG14 | uncharacterized protein LOC1 | not DE   | not DE   | not DE   | not DE  |
| EVM0009250 | LG14 | uncharacterized protein LOC1 | not DE   | not DE   | not DE   | not DE  |
| EVM0017976 | LG14 | uncharacterized protein LOC1 | not DE   | not DE   | -1.36223 | #####   |
| EVM0008381 | LG14 | uncharacterized protein LOC1 | not DE   | not DE   | not DE   | not DE  |
| EVM0001322 | LG14 | uncharacterized protein LOC1 | not DE   | not DE   | 2.400133 | 0.00587 |
| EVM0010603 | LG14 | uncharacterized protein LOC1 | not DE   | not DE   | not DE   | not DE  |
| EVM0019320 | LG14 | uncharacterized protein LOC1 | not DE   | not DE   | 1.143828 | 0.02708 |
| EVM0016304 | LG14 | uncharacterized protein LOC1 | not DE   | not DE   | not DE   | not DE  |
| EVM0022242 | LG14 | uncharacterized protein LOC1 | not DE   | not DE   | not DE   | not DE  |
| EVM0020745 | LG14 | uncharacterized protein LOC1 | not DE   | not DE   | not DE   | not DE  |
| EVM0001216 | LG14 | uncharacterized protein LOC1 | not DE   | not DE   | not DE   | not DE  |
| EVM0012470 | LG14 | uncharacterized protein LOC1 | 2.497406 | 0.021748 | not DE   | not DE  |
| EVM0021096 | LG14 | uncharacterized protein LOC1 | not DE   | not DE   | not DE   | not DE  |
| EVM0013218 | LG14 | uncharacterized protein LOC1 | not DE   | not DE   | not DE   | not DE  |
| EVM0022480 | LG14 | uncharacterized protein LOC1 | not DE   | not DE   | not DE   | not DE  |
| EVM0003383 | LG14 | uncharacterized protein LOC1 | not DE   | not DE   | not DE   | not DE  |
| EVM0020894 | LG14 | uncharacterized protein LOC1 | not DE   | not DE   | not DE   | not DE  |
| EVM0016205 | LG14 | uncharacterized protein LOC1 | not DE   | not DE   | 1.382555 | #####   |
| EVM0021131 | LG14 | uncharacterized protein LOC1 | not DE   | not DE   | not DE   | not DE  |
| EVM0007905 | LG14 | uncharacterized protein LOC1 | not DE   | not DE   | not DE   | not DE  |
| EVM0006509 | LG14 | uncharacterized protein LOC1 | not DE   | not DE   | not DE   | not DE  |
| EVM0020763 | LG14 | uncharacterized protein LOC1 | not DE   | not DE   | not DE   | not DE  |
| EVM0016073 | LG14 | uncharacterized protein LOC1 | not DE   | not DE   | not DE   | not DE  |
| EVM0018683 | LG14 | uncharacterized protein LOC1 | not DE   | not DE   | not DE   | not DE  |
| EVM0021736 | LG14 | uncharacterized protein LOC1 | not DE   | not DE   | not DE   | not DE  |
| EVM0019845 | LG14 | uncharacterized protein LOC1 | not DE   | not DE   | not DE   | not DE  |
| EVM0007847 | LG14 | uncharacterized protein LOC1 | not DE   | not DE   | 1.251355 | 0.02163 |
| EVM0017339 | LG14 | uncharacterized protein LOC1 | not DE   | not DE   | not DE   | not DE  |
| EVM0002668 | LG14 | uncharacterized protein LOC1 | not DE   | not DE   | not DE   | not DE  |
| EVM0011900 | LG14 | uncharacterized protein LOC1 | not DE   | not DE   | not DE   | not DE  |
| EVM0020236 | LG14 | uncharacterized protein LOC1 | not DE   | not DE   | not DE   | not DE  |
| EVM0006069 | LG14 | uncharacterized protein LOC1 | not DE   | not DE   | not DE   | not DE  |
| EVM0021077 | LG14 | uncharacterized protein LOC1 | not DE   | not DE   | not DE   | not DE  |
| EVM0017623 | LG14 | uncharacterized protein LOC1 | not DE   | not DE   | not DE   | not DE  |
| EVM0002793 | LG14 | uncharacterized protein LOC1 | not DE   | not DE   | not DE   | not DE  |
| EVM0006416 | LG14 | uncharacterized protein LOC1 | not DE   | not DE   | not DE   | not DE  |
| EVM0019074 | LG14 | uncharacterized protein LOC1 | 2.740841 | 0.0061   | not DE   | not DE  |
| EVM0021156 | LG14 | uncharacterized protein LOC1 | not DE   | not DE   | not DE   | not DE  |
| EVM0000487 | LG14 | uncharacterized protein LOC1 | not DE   | not DE   | not DE   | not DE  |
| EVM0001947 | LG14 | uncharacterized protein LOC1 | not DE   | not DE   | -1.02915 | 0.01884 |
| EVM0014773 | LG14 | uncharacterized protein LOC1 | not DE   | not DE   | not DE   | not DE  |
| EVM0000790 | LG14 | uncharacterized protein LOC1 | not DE   | not DE   | not DE   | not DE  |
| EVM0021687 | LG14 | uncharacterized protein LOC1 | not DE   | not DE   | 1.054053 | 0.03147 |

|            |      |                               |          |          |          |         |
|------------|------|-------------------------------|----------|----------|----------|---------|
| EVM0010127 | LG14 | uncharacterized protein LOC1  | not DE   | not DE   | not DE   | not DE  |
| EVM0015880 | LG14 | uncharacterized protein LOC1  | not DE   | not DE   | not DE   | not DE  |
| EVM0016313 | LG14 | uncharacterized protein LOC1  | not DE   | not DE   | not DE   | not DE  |
| EVM0010046 | LG14 | uncharacterized protein LOC1  | not DE   | not DE   | not DE   | not DE  |
| EVM0022103 | LG14 | uncharacterized protein LOC1  | not DE   | not DE   | not DE   | not DE  |
| EVM0002242 | LG14 | uncharacterized protein LOC1  | not DE   | not DE   | not DE   | not DE  |
| EVM0009763 | LG14 | uncharacterized protein LOC1  | not DE   | not DE   | not DE   | not DE  |
| EVM0021824 | LG14 | uncharacterized protein LOC1  | not DE   | not DE   | not DE   | not DE  |
| EVM0004377 | LG14 | uncharacterized protein LOC1  | not DE   | not DE   | not DE   | not DE  |
| EVM0003698 | LG14 | uncharacterized protein LOC1  | not DE   | not DE   | not DE   | not DE  |
| EVM0009548 | LG14 | uncharacterized protein LOC1  | not DE   | not DE   | not DE   | not DE  |
| EVM0004760 | LG14 | uncharacterized protein LOC1  | not DE   | not DE   | 1.553063 | #####   |
| EVM0020604 | LG14 | uncharacterized protein LOC1  | not DE   | not DE   | not DE   | not DE  |
| EVM0011113 | LG14 | uncharacterized protein LOC1  | not DE   | not DE   | not DE   | not DE  |
| EVM0013422 | LG14 | uncharacterized protein LOC1  | not DE   | not DE   | not DE   | not DE  |
| EVM0013694 | LG14 | uncharacterized protein LOC1  | not DE   | not DE   | not DE   | not DE  |
| EVM0012118 | LG14 | uncharacterized protein LOC1  | not DE   | not DE   | not DE   | not DE  |
| EVM0022567 | LG14 | uncharacterized protein LOC1  | not DE   | not DE   | not DE   | not DE  |
| EVM0010822 | LG14 | uncharacterized protein LOC1  | not DE   | not DE   | not DE   | not DE  |
| EVM0023592 | LG14 | uncharacterized protein LOC1  | not DE   | not DE   | -1.48868 | 0.04212 |
| EVM0005522 | LG14 | uncharacterized protein LOC1  | not DE   | not DE   | not DE   | not DE  |
| EVM0018039 | LG14 | uncharacterized protein LOC1  | not DE   | not DE   | not DE   | not DE  |
| EVM0006610 | LG14 | uncharacterized protein LOC1  | not DE   | not DE   | not DE   | not DE  |
| EVM0017305 | LG14 | uncharacterized protein LOC1  | not DE   | not DE   | not DE   | not DE  |
| EVM0016692 | LG14 | uncharacterized protein LOC1  | not DE   | not DE   | not DE   | not DE  |
| EVM0014354 | LG14 | uncharacterized protein LOC1  | not DE   | not DE   | not DE   | not DE  |
| EVM0000457 | LG14 | uncharacterized protein LOC1  | not DE   | not DE   | not DE   | not DE  |
| EVM0013197 | LG14 | uncharacterized protein LOC1  | not DE   | not DE   | not DE   | not DE  |
| EVM0011824 | LG14 | uncharacterized protein LOC1  | not DE   | not DE   | not DE   | not DE  |
| EVM0019183 | LG14 | uncharacterized protein LOC1  | not DE   | not DE   | not DE   | not DE  |
| EVM0008382 | LG14 | uncharacterized protein LOC1  | -1.41384 | 0.000707 | not DE   | not DE  |
| EVM0022323 | LG14 | uncharacterized protein LOC1  | not DE   | not DE   | not DE   | not DE  |
| EVM0008333 | LG14 | uroporphyrinogen decarboxyla  | not DE   | not DE   | not DE   | not DE  |
| EVM0012413 | LG14 | vacuolar cation/proton excha  | not DE   | not DE   | not DE   | not DE  |
| EVM0022117 | LG14 | vacuolar protein sorting-ass  | not DE   | not DE   | not DE   | not DE  |
| EVM0020490 | LG14 | vesicle-associated protein 4  | not DE   | not DE   | not DE   | not DE  |
| EVM0011670 | LG14 | vinorine synthase-like        | not DE   | not DE   | not DE   | not DE  |
| EVM0014243 | LG14 | wall-associated receptor kin  | not DE   | not DE   | not DE   | not DE  |
| EVM0017306 | LG14 | wall-associated receptor kin  | not DE   | not DE   | not DE   | not DE  |
| EVM0020579 | LG14 | wall-associated receptor kin  | not DE   | not DE   | not DE   | not DE  |
| EVM0014479 | LG14 | zinc finger protein CONSTANS  | not DE   | not DE   | not DE   | not DE  |
| EVM0006449 | LG14 | zinc finger protein ZAT9      | not DE   | not DE   | not DE   | not DE  |
| EVM0020707 | LG14 | zinc transporter 2-like       | -1.10331 | 0.009851 | not DE   | not DE  |
| EVM0004179 | LG14 | (+)-delta-cadinene synthase i | not DE   | not DE   | not DE   | not DE  |
| EVM0004405 | LG14 | (+)-delta-cadinene synthase i | not DE   | not DE   | not DE   | not DE  |
| EVM0005321 | LG14 | (+)-delta-cadinene synthase i | not DE   | not DE   | not DE   | not DE  |
| EVM0008198 | LG14 | (+)-delta-cadinene synthase i | not DE   | not DE   | not DE   | not DE  |
| EVM0008679 | LG14 | (+)-delta-cadinene synthase i | not DE   | not DE   | not DE   | not DE  |
| EVM0011780 | LG14 | (+)-delta-cadinene synthase i | not DE   | not DE   | not DE   | not DE  |
| EVM0014715 | LG14 | 1-acyl-sn-glycerol-3-phosphat | not DE   | not DE   | not DE   | not DE  |
| EVM0014774 | LG14 | AP2 domain class transcripcti | not DE   | not DE   | not DE   | not DE  |
| EVM0012524 | LG14 | AT hook motif-containing prot | not DE   | not DE   | not DE   | not DE  |
| EVM0014178 | LG14 | ATP binding protein, putative | not DE   | not DE   | not DE   | not DE  |
| EVM0023635 | LG14 | B-cell lymphoma 6 protein, pu | not DE   | not DE   | not DE   | not DE  |

|            |      |                                                         |          |          |          |         |
|------------|------|---------------------------------------------------------|----------|----------|----------|---------|
| EVM0001930 | LG14 | BTB/POZ domain-containing protein                       | not DE   | not DE   | not DE   | not DE  |
| EVM0014378 | LG14 | Basic helix-loop-helix DNA-binding protein 1            | -1.57106 | 0.034519 | not DE   | not DE  |
| EVM0006347 | LG14 | Basic-leucine zipper transcription factor 1             | not DE   | not DE   | not DE   | not DE  |
| EVM0015800 | LG14 | Basic-leucine zipper transcription factor 2             | not DE   | not DE   | not DE   | not DE  |
| EVM0005721 | LG14 | C-repeat binding transcription factor 1                 | not DE   | not DE   | not DE   | not DE  |
| EVM0000394 | LG14 | C2 domain-containing protein 1                          | not DE   | not DE   | not DE   | not DE  |
| EVM0009098 | LG14 | Calcium-activated outward-rectifier potassium channel 1 | not DE   | not DE   | not DE   | not DE  |
| EVM0019187 | LG14 | Calcium-binding protein, putative                       | not DE   | not DE   | not DE   | not DE  |
| EVM0014803 | LG14 | Calcium-dependent protein kinase 1                      | not DE   | not DE   | not DE   | not DE  |
| EVM0009364 | LG14 | Ccd1, putative                                          | not DE   | not DE   | not DE   | not DE  |
| EVM0009645 | LG14 | Cellulose synthase-like D5                              | not DE   | not DE   | not DE   | not DE  |
| EVM0014637 | LG14 | Cellulose synthase-like D5                              | not DE   | not DE   | not DE   | not DE  |
| EVM0018740 | LG14 | Concanavalin A-like lectin protein                      | not DE   | not DE   | not DE   | not DE  |
| EVM0006012 | LG14 | Curculin-like (mannose-binding protein)                 | not DE   | not DE   | -5.25371 | 0.01272 |
| EVM0022938 | LG14 | Curculin-like (mannose-binding protein)                 | not DE   | not DE   | not DE   | not DE  |
| EVM0013860 | LG14 | Cysteine-rich receptor-like protein                     | not DE   | not DE   | not DE   | not DE  |
| EVM0020034 | LG14 | Cysteine-rich receptor-like protein                     | not DE   | not DE   | not DE   | not DE  |
| EVM0003338 | LG14 | Cytochrome P450                                         | not DE   | not DE   | not DE   | not DE  |
| EVM0012853 | LG14 | Cytochrome P450                                         | not DE   | not DE   | not DE   | not DE  |
| EVM0017903 | LG14 | Cytochrome P450                                         | not DE   | not DE   | not DE   | not DE  |
| EVM0018265 | LG14 | Cytochrome P450                                         | not DE   | not DE   | not DE   | not DE  |
| EVM0023905 | LG14 | Cytochrome P450 71D11                                   | not DE   | not DE   | not DE   | not DE  |
| EVM0024544 | LG14 | Cytochrome b5 isoform 1                                 | not DE   | not DE   | not DE   | not DE  |
| EVM0019051 | LG14 | Cytokinin riboside 5'-monophosphate                     | not DE   | not DE   | not DE   | not DE  |
| EVM0014812 | LG14 | DNA binding protein, putative                           | not DE   | not DE   | not DE   | not DE  |
| EVM0011758 | LG14 | DNA-binding storekeeper protein                         | not DE   | not DE   | not DE   | not DE  |
| EVM0002062 | LG14 | DNA-directed RNA polymerase subunit 1                   | not DE   | not DE   | not DE   | not DE  |
| EVM0006754 | LG14 | DNA/RNA polymerases superfamily 1                       | not DE   | not DE   | not DE   | not DE  |
| EVM0019859 | LG14 | DNA/RNA polymerases superfamily 1                       | not DE   | not DE   | not DE   | not DE  |
| EVM0013531 | LG14 | DNase I-like superfamily protein                        | not DE   | not DE   | not DE   | not DE  |
| EVM0005530 | LG14 | Disease resistance family protein                       | not DE   | not DE   | not DE   | not DE  |
| EVM0013012 | LG14 | Embryo defective 2737                                   | not DE   | not DE   | not DE   | not DE  |
| EVM0002468 | LG14 | Expression of the gene is downregulated                 | not DE   | not DE   | not DE   | not DE  |
| EVM0006548 | LG14 | Expression of the gene is downregulated                 | not DE   | not DE   | not DE   | not DE  |
| EVM0012673 | LG14 | Expression of the gene is downregulated                 | not DE   | not DE   | not DE   | not DE  |
| EVM0013595 | LG14 | Expression of the gene is downregulated                 | not DE   | not DE   | not DE   | not DE  |
| EVM0018700 | LG14 | Expression of the gene is downregulated                 | not DE   | not DE   | not DE   | not DE  |
| EVM0011640 | LG14 | F-box SKIP23-like protein                               | not DE   | not DE   | not DE   | not DE  |
| EVM0013616 | LG14 | F1504.13                                                | not DE   | not DE   | not DE   | not DE  |
| EVM0017273 | LG14 | GRF1-interacting factor 3                               | not DE   | not DE   | not DE   | not DE  |
| EVM0000817 | LG14 | Glutamate receptor 1.1, putative                        | not DE   | not DE   | not DE   | not DE  |
| EVM0002064 | LG14 | Glutamate receptor 1.1, putative                        | not DE   | not DE   | not DE   | not DE  |
| EVM0003755 | LG14 | Glutamate receptor 1.1, putative                        | not DE   | not DE   | not DE   | not DE  |
| EVM0009716 | LG14 | Glutamate receptor 1.1, putative                        | not DE   | not DE   | not DE   | not DE  |
| EVM0012050 | LG14 | Glutamate receptor 1.1, putative                        | not DE   | not DE   | not DE   | not DE  |
| EVM0020864 | LG14 | Glutamate receptor 1.1, putative                        | not DE   | not DE   | not DE   | not DE  |
| EVM0016770 | LG14 | Glutathione transport system                            | not DE   | not DE   | not DE   | not DE  |
| EVM0014029 | LG14 | Growth-regulating factor 7, putative                    | not DE   | not DE   | not DE   | not DE  |
| EVM0014082 | LG14 | Heavy metal transport/detoxification protein            | not DE   | not DE   | not DE   | not DE  |
| EVM0021139 | LG14 | IQ-domain 17, putative                                  | not DE   | not DE   | not DE   | not DE  |
| EVM0018282 | LG14 | IQ-domain 21, putative isoform 1                        | not DE   | not DE   | not DE   | not DE  |
| EVM0021782 | LG14 | IQ-domain 21, putative isoform 2                        | not DE   | not DE   | not DE   | not DE  |
| EVM0010793 | LG14 | Kinase family protein                                   | not DE   | not DE   | not DE   | not DE  |
| EVM0016444 | LG14 | Kinesin-like protein 1 isoform 1                        | not DE   | not DE   | not DE   | not DE  |

|            |      |                                |          |          |          |         |
|------------|------|--------------------------------|----------|----------|----------|---------|
| EVM0015955 | LG14 | LEC1 transcription factor      | not DE   | not DE   | not DE   | not DE  |
| EVM0002441 | LG14 | LIM and calponin domains-cont  | not DE   | not DE   | not DE   | not DE  |
| EVM0014300 | LG14 | Leucine-rich repeat transmemb  | not DE   | not DE   | not DE   | not DE  |
| EVM0011820 | LG14 | MRNA capping enzyme family pr  | not DE   | not DE   | not DE   | not DE  |
| EVM0012747 | LG14 | Microtubule-associated protei  | not DE   | not DE   | not DE   | not DE  |
| EVM0003043 | LG14 | NAC domain class transcriptio  | 4.011352 | 2.33E-10 | -1.28089 | 0.02037 |
| EVM0020197 | LG14 | NAC domain protein             | not DE   | not DE   | not DE   | not DE  |
| EVM0023843 | LG14 | NAC domain protein             | not DE   | not DE   | not DE   | not DE  |
| EVM0016020 | LG14 | NAC domain protein, IPR003441  | not DE   | not DE   | not DE   | not DE  |
| EVM0004375 | LG14 | NAC domain-containing 29 -lik  | not DE   | not DE   | not DE   | not DE  |
| EVM0005268 | LG14 | NAC domain-containing protein  | not DE   | not DE   | not DE   | not DE  |
| EVM0004599 | LG14 | NADH:ubiquinone oxidoreductas  | not DE   | not DE   | not DE   | not DE  |
| EVM0001026 | LG14 | Nodulin MtN21 /EamA-like tran  | not DE   | not DE   | not DE   | not DE  |
| EVM0001312 | LG14 | Nodulin MtN21 /EamA-like tran  | not DE   | not DE   | not DE   | not DE  |
| EVM0022416 | LG14 | Nodulin MtN21 /EamA-like tran  | not DE   | not DE   | not DE   | not DE  |
| EVM0015374 | LG14 | Nucleotide-diphospho-sugar tr  | not DE   | not DE   | not DE   | not DE  |
| EVM0022494 | LG14 | Nudix hydrolase 10 -like prot  | 1.485578 | 0.034712 | not DE   | not DE  |
| EVM0004010 | LG14 | O-Glycosyl hydrolases family   | not DE   | not DE   | not DE   | not DE  |
| EVM0024038 | LG14 | O-Glycosyl hydrolases family   | not DE   | not DE   | not DE   | not DE  |
| EVM0014530 | LG14 | Pectin lyase-like superfamily  | not DE   | not DE   | not DE   | not DE  |
| EVM0015644 | LG14 | Pectin lyase-like superfamily  | not DE   | not DE   | not DE   | not DE  |
| EVM0004043 | LG14 | Pectinesterase U1 precursor,   | not DE   | not DE   | not DE   | not DE  |
| EVM0003458 | LG14 | Pis v 1 allergen 2S albumin    | not DE   | not DE   | not DE   | not DE  |
| EVM0004690 | LG14 | Plasma-membrane choline trans  | not DE   | not DE   | not DE   | not DE  |
| EVM0011526 | LG14 | Plasma-membrane choline trans  | not DE   | not DE   | not DE   | not DE  |
| EVM0017712 | LG14 | Polyubiquitin-A                | not DE   | not DE   | not DE   | not DE  |
| EVM0019389 | LG14 | Premnaspirodiene oxygenase     | not DE   | not DE   | not DE   | not DE  |
| EVM0002637 | LG14 | Putative pectinesterase/pecti  | not DE   | not DE   | not DE   | not DE  |
| EVM0022187 | LG14 | Putative pectinesterase/pecti  | not DE   | not DE   | not DE   | not DE  |
| EVM0015142 | LG14 | RING-H2 zinc finger protein R  | not DE   | not DE   | not DE   | not DE  |
| EVM0006477 | LG14 | RING/U-box superfamily protei  | not DE   | not DE   | not DE   | not DE  |
| EVM0000962 | LG14 | RNA-binding family protein is  | not DE   | not DE   | not DE   | not DE  |
| EVM0021977 | LG14 | RNA-binding family protein is  | not DE   | not DE   | not DE   | not DE  |
| EVM0011460 | LG14 | Ribonuclease P family protein  | not DE   | not DE   | not DE   | not DE  |
| EVM0013227 | LG14 | S-adenosyl-L-methionine-depen  | not DE   | not DE   | not DE   | not DE  |
| EVM0016606 | LG14 | SPFH/Band 7/PHB domain-contain | not DE   | not DE   | not DE   | not DE  |
| EVM0020221 | LG14 | SWIB/MDM2 domain superfamily   | not DE   | not DE   | not DE   | not DE  |
| EVM0022908 | LG14 | Serine/threonine-protein kin   | not DE   | not DE   | not DE   | not DE  |
| EVM0016273 | LG14 | Serine/threonine-protein kin   | 1.978196 | 0.000204 | not DE   | not DE  |
| EVM0024497 | LG14 | Spo11/DNA topoisomerase VI     | not DE   | not DE   | not DE   | not DE  |
| EVM0019285 | LG14 | Squalene monooxygenase         | not DE   | not DE   | not DE   | not DE  |
| EVM0017350 | LG14 | To encode a PR protein, Belon  | not DE   | not DE   | not DE   | not DE  |
| EVM0009868 | LG14 | Transcription elongation fact  | not DE   | not DE   | not DE   | not DE  |
| EVM0020792 | LG14 | Transcription factor MYB811    | not DE   | not DE   | not DE   | not DE  |
| EVM0021695 | LG14 | Transmembrane amino acid tran  | not DE   | not DE   | not DE   | not DE  |
| EVM0000549 | LG14 | Transmembrane proteins 14C     | not DE   | not DE   | not DE   | not DE  |
| EVM0009502 | LG14 | Transmembrane proteins 14C     | not DE   | not DE   | not DE   | not DE  |
| EVM0001072 | LG14 | UDP-Glycosyltransferase super  | not DE   | not DE   | not DE   | not DE  |
| EVM0009687 | LG14 | UDP-Glycosyltransferase super  | not DE   | not DE   | not DE   | not DE  |
| EVM0013612 | LG14 | UDP-Glycosyltransferase super  | not DE   | not DE   | not DE   | not DE  |
| EVM0023748 | LG14 | UDP-Glycosyltransferase super  | not DE   | not DE   | not DE   | not DE  |
| EVM0016714 | LG14 | UDP-glucosyltransferase, puta  | not DE   | not DE   | not DE   | not DE  |
| EVM0018385 | LG14 | UDP-glucosyltransferase, puta  | not DE   | not DE   | not DE   | not DE  |
| EVM0016593 | LG14 | Ubiquitin                      | not DE   | not DE   | not DE   | not DE  |

|            |      |                                 |          |          |          |         |
|------------|------|---------------------------------|----------|----------|----------|---------|
| EVM0011479 | LG14 | Ubiquitin supergroup, Ribosomal | not DE   | not DE   | not DE   | not DE  |
| EVM0004663 | LG14 | Uncharacterized protein TCM_C   | not DE   | not DE   | not DE   | not DE  |
| EVM0017584 | LG14 | Uncharacterized protein TCM_C   | not DE   | not DE   | not DE   | not DE  |
| EVM0003074 | LG14 | Uncharacterized protein TCM_C   | -3.60127 | 0.000711 | not DE   | not DE  |
| EVM0019885 | LG14 | Uncharacterized protein TCM_C   | not DE   | not DE   | 2.777076 | 0.00028 |
| EVM0004018 | LG14 | Uncharacterized protein TCM_C   | not DE   | not DE   | not DE   | not DE  |
| EVM0005335 | LG14 | Uncharacterized protein isofo   | not DE   | not DE   | not DE   | not DE  |
| EVM0014608 | LG14 | Uncharacterized protein isofo   | -2.01155 | 0.003268 | not DE   | not DE  |
| EVM0015037 | LG14 | Uncharacterized protein isofo   | 1.662212 | 2.68E-06 | not DE   | not DE  |
| EVM0004932 | LG14 | WD repeat family protein        | not DE   | not DE   | not DE   | not DE  |
| EVM0011943 | LG14 | WRKY transcription factor-like  | not DE   | not DE   | not DE   | not DE  |
| EVM0022592 | LG14 | Wax synthase, putative          | -1.49755 | 0.000409 | not DE   | not DE  |
| EVM0007484 | LG14 | White-brown complex protein l   | not DE   | not DE   | not DE   | not DE  |
| EVM0011655 | LG14 | White-brown complex protein l   | not DE   | not DE   | not DE   | not DE  |
| EVM0015210 | LG14 | Yippee family zinc-binding pr   | not DE   | not DE   | not DE   | not DE  |
| EVM0024426 | LG14 | actin binding protein, putati   | not DE   | not DE   | not DE   | not DE  |
| EVM0008438 | LG14 | caffeic acid O-methyltransfer   | not DE   | not DE   | not DE   | not DE  |
| EVM0015521 | LG14 | caffeic acid O-methyltransfer   | not DE   | not DE   | not DE   | not DE  |
| EVM0002342 | LG14 | caffeic acid O-methyltransfer   | not DE   | not DE   | not DE   | not DE  |
| EVM0017932 | LG14 | chlorophyll A/B binding prote   | -3.56182 | 7.72E-06 | not DE   | not DE  |
| EVM0004192 | LG14 | conserved hypothetical protei   | not DE   | not DE   | -1.26807 | 0.00063 |
| EVM0005248 | LG14 | conserved hypothetical protei   | not DE   | not DE   | not DE   | not DE  |
| EVM0014543 | LG14 | conserved hypothetical protei   | not DE   | not DE   | not DE   | not DE  |
| EVM0018107 | LG14 | conserved hypothetical protei   | not DE   | not DE   | not DE   | not DE  |
| EVM0024553 | LG14 | conserved hypothetical protei   | not DE   | not DE   | not DE   | not DE  |
| EVM0003960 | LG14 | farnesyl pyrophosphate syntha   | not DE   | not DE   | not DE   | not DE  |
| EVM0017844 | LG14 | gaba(A) receptor-associated p   | not DE   | not DE   | not DE   | not DE  |
| EVM0004595 | LG14 | galactosyltransferase family    | not DE   | not DE   | not DE   | not DE  |
| EVM0001671 | LG14 | glutathione transferase, part   | not DE   | not DE   | not DE   | not DE  |
| EVM0017573 | LG14 | glutathione transferase, part   | not DE   | not DE   | not DE   | not DE  |
| EVM0020599 | LG14 | heat shock protein 21           | not DE   | not DE   | not DE   | not DE  |
| EVM0018314 | LG14 | homeobox leucine zipper prote   | not DE   | not DE   | not DE   | not DE  |
| EVM0003551 | LG14 | hypothetical protein            | not DE   | not DE   | not DE   | not DE  |
| EVM0016486 | LG14 | hypothetical protein AMTR_s03   | not DE   | not DE   | not DE   | not DE  |
| EVM0016291 | LG14 | hypothetical protein ARALYDRA   | not DE   | not DE   | 1.208173 | 0.02199 |
| EVM0023712 | LG14 | hypothetical protein CICLE_vl   | not DE   | not DE   | not DE   | not DE  |
| EVM0013867 | LG14 | hypothetical protein CICLE_vl   | not DE   | not DE   | not DE   | not DE  |
| EVM0022045 | LG14 | hypothetical protein CICLE_vl   | not DE   | not DE   | not DE   | not DE  |
| EVM0003987 | LG14 | hypothetical protein CICLE_vl   | not DE   | not DE   | not DE   | not DE  |
| EVM0013356 | LG14 | hypothetical protein CICLE_vl   | not DE   | not DE   | not DE   | not DE  |
| EVM0020198 | LG14 | hypothetical protein CICLE_vl   | not DE   | not DE   | not DE   | not DE  |
| EVM0003939 | LG14 | hypothetical protein CICLE_vl   | not DE   | not DE   | not DE   | not DE  |
| EVM0009300 | LG14 | hypothetical protein CICLE_vl   | not DE   | not DE   | not DE   | not DE  |
| EVM0006276 | LG14 | hypothetical protein CICLE_vl   | not DE   | not DE   | not DE   | not DE  |
| EVM0011111 | LG14 | hypothetical protein CICLE_vl   | not DE   | not DE   | -2.0027  | #####   |
| EVM0019222 | LG14 | hypothetical protein CICLE_vl   | not DE   | not DE   | not DE   | not DE  |
| EVM0020096 | LG14 | hypothetical protein CICLE_vl   | not DE   | not DE   | not DE   | not DE  |
| EVM0014143 | LG14 | hypothetical protein CICLE_vl   | not DE   | not DE   | not DE   | not DE  |
| EVM0002478 | LG14 | hypothetical protein CICLE_vl   | not DE   | not DE   | not DE   | not DE  |
| EVM0024053 | LG14 | hypothetical protein CICLE_vl   | not DE   | not DE   | not DE   | not DE  |
| EVM0017828 | LG14 | hypothetical protein CICLE_vl   | not DE   | not DE   | not DE   | not DE  |
| EVM0002764 | LG14 | hypothetical protein CICLE_vl   | not DE   | not DE   | not DE   | not DE  |
| EVM0015796 | LG14 | hypothetical protein CICLE_vl   | not DE   | not DE   | not DE   | not DE  |
| EVM0022484 | LG14 | hypothetical protein CICLE_vl   | not DE   | not DE   | not DE   | not DE  |







|            |      |                               |          |          |          |         |
|------------|------|-------------------------------|----------|----------|----------|---------|
| EVM0023597 | LG14 | hypothetical protein CICLE_v1 | not DE   | not DE   | not DE   | not DE  |
| EVM0024093 | LG14 | hypothetical protein CICLE_v1 | not DE   | not DE   | not DE   | not DE  |
| EVM0012324 | LG14 | hypothetical protein CICLE_v1 | not DE   | not DE   | not DE   | not DE  |
| EVM0018304 | LG14 | hypothetical protein CICLE_v1 | not DE   | not DE   | not DE   | not DE  |
| EVM0008870 | LG14 | hypothetical protein CICLE_v1 | not DE   | not DE   | not DE   | not DE  |
| EVM0019975 | LG14 | hypothetical protein CICLE_v1 | not DE   | not DE   | not DE   | not DE  |
| EVM0017375 | LG14 | hypothetical protein CICLE_v1 | not DE   | not DE   | not DE   | not DE  |
| EVM0024311 | LG14 | hypothetical protein CICLE_v1 | not DE   | not DE   | not DE   | not DE  |
| EVM0024576 | LG14 | hypothetical protein CICLE_v1 | not DE   | not DE   | not DE   | not DE  |
| EVM0002574 | LG14 | hypothetical protein CICLE_v1 | not DE   | not DE   | not DE   | not DE  |
| EVM0004684 | LG14 | hypothetical protein CICLE_v1 | not DE   | not DE   | not DE   | not DE  |
| EVM0013148 | LG14 | hypothetical protein CICLE_v1 | not DE   | not DE   | -1.17044 | 0.04845 |
| EVM0014743 | LG14 | hypothetical protein CICLE_v1 | not DE   | not DE   | not DE   | not DE  |
| EVM0013440 | LG14 | hypothetical protein CICLE_v1 | not DE   | not DE   | not DE   | not DE  |
| EVM0011435 | LG14 | hypothetical protein CICLE_v1 | not DE   | not DE   | not DE   | not DE  |
| EVM0010947 | LG14 | hypothetical protein CICLE_v1 | not DE   | not DE   | not DE   | not DE  |
| EVM0004465 | LG14 | hypothetical protein CICLE_v1 | not DE   | not DE   | not DE   | not DE  |
| EVM0011664 | LG14 | hypothetical protein CICLE_v1 | not DE   | not DE   | not DE   | not DE  |
| EVM0012521 | LG14 | hypothetical protein CICLE_v1 | -2.19086 | 0.011135 | not DE   | not DE  |
| EVM0006077 | LG14 | hypothetical protein CICLE_v1 | -1.59659 | 0.031679 | not DE   | not DE  |
| EVM0020557 | LG14 | hypothetical protein CICLE_v1 | not DE   | not DE   | not DE   | not DE  |
| EVM0012781 | LG14 | hypothetical protein CICLE_v1 | not DE   | not DE   | not DE   | not DE  |
| EVM0014045 | LG14 | hypothetical protein CICLE_v1 | not DE   | not DE   | 1.159061 | 0.01503 |
| EVM0013389 | LG14 | hypothetical protein CICLE_v1 | not DE   | not DE   | not DE   | not DE  |
| EVM0012449 | LG14 | hypothetical protein CICLE_v1 | not DE   | not DE   | -1.29288 | 0.00811 |
| EVM0002220 | LG14 | hypothetical protein CICLE_v1 | not DE   | not DE   | not DE   | not DE  |
| EVM0018492 | LG14 | hypothetical protein CICLE_v1 | not DE   | not DE   | 1.166043 | 0.01692 |
| EVM0006698 | LG14 | hypothetical protein CICLE_v1 | not DE   | not DE   | not DE   | not DE  |
| EVM0002118 | LG14 | hypothetical protein CICLE_v1 | not DE   | not DE   | not DE   | not DE  |
| EVM0004210 | LG14 | hypothetical protein CICLE_v1 | not DE   | not DE   | not DE   | not DE  |
| EVM0012929 | LG14 | hypothetical protein CICLE_v1 | -1.68287 | 0.033991 | not DE   | not DE  |
| EVM0010577 | LG14 | hypothetical protein CICLE_v1 | not DE   | not DE   | not DE   | not DE  |
| EVM0006348 | LG14 | hypothetical protein CICLE_v1 | not DE   | not DE   | not DE   | not DE  |
| EVM0003736 | LG14 | hypothetical protein CICLE_v1 | not DE   | not DE   | not DE   | not DE  |
| EVM0009559 | LG14 | hypothetical protein CICLE_v1 | not DE   | not DE   | not DE   | not DE  |
| EVM0018109 | LG14 | hypothetical protein CICLE_v1 | not DE   | not DE   | not DE   | not DE  |
| EVM0006957 | LG14 | hypothetical protein CICLE_v1 | not DE   | not DE   | not DE   | not DE  |
| EVM0005779 | LG14 | hypothetical protein CICLE_v1 | not DE   | not DE   | not DE   | not DE  |
| EVM0014735 | LG14 | hypothetical protein CICLE_v1 | not DE   | not DE   | not DE   | not DE  |
| EVM0012719 | LG14 | hypothetical protein CICLE_v1 | not DE   | not DE   | 1.103647 | 0.00045 |
| EVM0024183 | LG14 | hypothetical protein CICLE_v1 | not DE   | not DE   | not DE   | not DE  |
| EVM0018421 | LG14 | hypothetical protein CICLE_v1 | not DE   | not DE   | not DE   | not DE  |
| EVM0002559 | LG14 | hypothetical protein CICLE_v1 | not DE   | not DE   | not DE   | not DE  |
| EVM0000392 | LG14 | hypothetical protein CICLE_v1 | -1.73455 | 0.047713 | not DE   | not DE  |
| EVM0023423 | LG14 | hypothetical protein CICLE_v1 | not DE   | not DE   | not DE   | not DE  |
| EVM0002625 | LG14 | hypothetical protein CICLE_v1 | not DE   | not DE   | not DE   | not DE  |
| EVM0012872 | LG14 | hypothetical protein CICLE_v1 | not DE   | not DE   | not DE   | not DE  |
| EVM0005972 | LG14 | hypothetical protein CICLE_v1 | not DE   | not DE   | not DE   | not DE  |
| EVM0022943 | LG14 | hypothetical protein CICLE_v1 | not DE   | not DE   | not DE   | not DE  |
| EVM0003680 | LG14 | hypothetical protein CICLE_v1 | not DE   | not DE   | 1.131456 | 0.03564 |
| EVM0018081 | LG14 | hypothetical protein CICLE_v1 | not DE   | not DE   | not DE   | not DE  |
| EVM0013533 | LG14 | hypothetical protein CICLE_v1 | not DE   | not DE   | not DE   | not DE  |
| EVM0005345 | LG14 | hypothetical protein CICLE_v1 | not DE   | not DE   | not DE   | not DE  |
| EVM0006075 | LG14 | hypothetical protein CICLE_v1 | not DE   | not DE   | not DE   | not DE  |

|            |      |                               |          |          |          |         |
|------------|------|-------------------------------|----------|----------|----------|---------|
| EVM0019917 | LG14 | hypothetical protein CICLE_v1 | not DE   | not DE   | not DE   | not DE  |
| EVM0003296 | LG14 | hypothetical protein CICLE_v1 | not DE   | not DE   | 1.311234 | 0.01224 |
| EVM0014098 | LG14 | hypothetical protein CICLE_v1 | not DE   | not DE   | not DE   | not DE  |
| EVM0021825 | LG14 | hypothetical protein CICLE_v1 | not DE   | not DE   | not DE   | not DE  |
| EVM0001535 | LG14 | hypothetical protein CICLE_v1 | not DE   | not DE   | not DE   | not DE  |
| EVM0003491 | LG14 | hypothetical protein CICLE_v1 | not DE   | not DE   | not DE   | not DE  |
| EVM0006214 | LG14 | hypothetical protein CICLE_v1 | not DE   | not DE   | not DE   | not DE  |
| EVM0021502 | LG14 | hypothetical protein CICLE_v1 | not DE   | not DE   | not DE   | not DE  |
| EVM0022115 | LG14 | hypothetical protein CICLE_v1 | not DE   | not DE   | not DE   | not DE  |
| EVM0003371 | LG14 | hypothetical protein CICLE_v1 | not DE   | not DE   | not DE   | not DE  |
| EVM0012414 | LG14 | hypothetical protein CICLE_v1 | not DE   | not DE   | not DE   | not DE  |
| EVM0006674 | LG14 | hypothetical protein CICLE_v1 | not DE   | not DE   | not DE   | not DE  |
| EVM0012320 | LG14 | hypothetical protein CICLE_v1 | not DE   | not DE   | not DE   | not DE  |
| EVM0004953 | LG14 | hypothetical protein CICLE_v1 | not DE   | not DE   | not DE   | not DE  |
| EVM0016417 | LG14 | hypothetical protein CICLE_v1 | not DE   | not DE   | not DE   | not DE  |
| EVM0006038 | LG14 | hypothetical protein CICLE_v1 | not DE   | not DE   | -1.75343 | 0.01158 |
| EVM0007114 | LG14 | hypothetical protein CICLE_v1 | not DE   | not DE   | not DE   | not DE  |
| EVM0009524 | LG14 | hypothetical protein CICLE_v1 | not DE   | not DE   | not DE   | not DE  |
| EVM0011422 | LG14 | hypothetical protein CICLE_v1 | not DE   | not DE   | not DE   | not DE  |
| EVM0012155 | LG14 | hypothetical protein CICLE_v1 | 6.732185 | 2.00E-05 | not DE   | not DE  |
| EVM0015911 | LG14 | hypothetical protein CICLE_v1 | 8.710157 | 9.62E-05 | not DE   | not DE  |
| EVM0000066 | LG14 | hypothetical protein CICLE_v1 | not DE   | not DE   | not DE   | not DE  |
| EVM0007515 | LG14 | hypothetical protein CICLE_v1 | not DE   | not DE   | not DE   | not DE  |
| EVM0011411 | LG14 | hypothetical protein CICLE_v1 | not DE   | not DE   | not DE   | not DE  |
| EVM0015950 | LG14 | hypothetical protein CICLE_v1 | not DE   | not DE   | not DE   | not DE  |
| EVM0017839 | LG14 | hypothetical protein CICLE_v1 | not DE   | not DE   | not DE   | not DE  |
| EVM0021493 | LG14 | hypothetical protein CICLE_v1 | not DE   | not DE   | not DE   | not DE  |
| EVM0019983 | LG14 | hypothetical protein CICLE_v1 | not DE   | not DE   | -1.02081 | 0.00281 |
| EVM0003786 | LG14 | hypothetical protein CICLE_v1 | not DE   | not DE   | not DE   | not DE  |
| EVM0016476 | LG14 | hypothetical protein CICLE_v1 | not DE   | not DE   | not DE   | not DE  |
| EVM0018466 | LG14 | hypothetical protein CICLE_v1 | not DE   | not DE   | not DE   | not DE  |
| EVM0021486 | LG14 | hypothetical protein CICLE_v1 | 2.312925 | 0.001333 | not DE   | not DE  |
| EVM0016954 | LG14 | hypothetical protein CICLE_v1 | not DE   | not DE   | not DE   | not DE  |
| EVM0018930 | LG14 | hypothetical protein CICLE_v1 | not DE   | not DE   | not DE   | not DE  |
| EVM0002128 | LG14 | hypothetical protein CICLE_v1 | not DE   | not DE   | not DE   | not DE  |
| EVM0010995 | LG14 | hypothetical protein CICLE_v1 | not DE   | not DE   | not DE   | not DE  |
| EVM0013519 | LG14 | hypothetical protein CICLE_v1 | not DE   | not DE   | not DE   | not DE  |
| EVM0021364 | LG14 | hypothetical protein CICLE_v1 | not DE   | not DE   | not DE   | not DE  |
| EVM0018527 | LG14 | hypothetical protein CICLE_v1 | not DE   | not DE   | not DE   | not DE  |
| EVM0006688 | LG14 | hypothetical protein CICLE_v1 | not DE   | not DE   | not DE   | not DE  |
| EVM0022740 | LG14 | hypothetical protein CICLE_v1 | not DE   | not DE   | not DE   | not DE  |
| EVM0003499 | LG14 | hypothetical protein CICLE_v1 | not DE   | not DE   | not DE   | not DE  |
| EVM0004044 | LG14 | hypothetical protein CICLE_v1 | 1.478913 | 1.08E-05 | not DE   | not DE  |
| EVM0020217 | LG14 | hypothetical protein CICLE_v1 | not DE   | not DE   | not DE   | not DE  |
| EVM0018172 | LG14 | hypothetical protein CICLE_v1 | not DE   | not DE   | not DE   | not DE  |
| EVM0007593 | LG14 | hypothetical protein CICLE_v1 | not DE   | not DE   | not DE   | not DE  |
| EVM0011316 | LG14 | hypothetical protein CICLE_v1 | not DE   | not DE   | not DE   | not DE  |
| EVM0018189 | LG14 | hypothetical protein CICLE_v1 | not DE   | not DE   | not DE   | not DE  |
| EVM0003512 | LG14 | hypothetical protein CICLE_v1 | not DE   | not DE   | not DE   | not DE  |
| EVM0018850 | LG14 | hypothetical protein CICLE_v1 | not DE   | not DE   | not DE   | not DE  |
| EVM0008237 | LG14 | hypothetical protein CICLE_v1 | not DE   | not DE   | not DE   | not DE  |
| EVM0011298 | LG14 | hypothetical protein CICLE_v1 | not DE   | not DE   | not DE   | not DE  |
| EVM0008393 | LG14 | hypothetical protein CICLE_v1 | not DE   | not DE   | not DE   | not DE  |
| EVM0011612 | LG14 | hypothetical protein CICLE_v1 | not DE   | not DE   | not DE   | not DE  |

|            |      |                               |          |          |          |         |
|------------|------|-------------------------------|----------|----------|----------|---------|
| EVM0000890 | LG14 | hypothetical protein CICLE_v1 | not DE   | not DE   | not DE   | not DE  |
| EVM0006993 | LG14 | hypothetical protein CICLE_v1 | not DE   | not DE   | not DE   | not DE  |
| EVM0020164 | LG14 | hypothetical protein CICLE_v1 | not DE   | not DE   | not DE   | not DE  |
| EVM0008440 | LG14 | hypothetical protein CICLE_v1 | not DE   | not DE   | not DE   | not DE  |
| EVM0022176 | LG14 | hypothetical protein CICLE_v1 | not DE   | not DE   | not DE   | not DE  |
| EVM0003290 | LG14 | hypothetical protein CICLE_v1 | not DE   | not DE   | not DE   | not DE  |
| EVM0005054 | LG14 | hypothetical protein CICLE_v1 | not DE   | not DE   | not DE   | not DE  |
| EVM0007100 | LG14 | hypothetical protein CICLE_v1 | not DE   | not DE   | not DE   | not DE  |
| EVM0008707 | LG14 | hypothetical protein CICLE_v1 | not DE   | not DE   | not DE   | not DE  |
| EVM0015243 | LG14 | hypothetical protein CICLE_v1 | not DE   | not DE   | not DE   | not DE  |
| EVM0001032 | LG14 | hypothetical protein CICLE_v1 | not DE   | not DE   | not DE   | not DE  |
| EVM0017639 | LG14 | hypothetical protein CICLE_v1 | not DE   | not DE   | not DE   | not DE  |
| EVM0023788 | LG14 | hypothetical protein CICLE_v1 | not DE   | not DE   | not DE   | not DE  |
| EVM0012306 | LG14 | hypothetical protein CICLE_v1 | not DE   | not DE   | not DE   | not DE  |
| EVM0016322 | LG14 | hypothetical protein CICLE_v1 | not DE   | not DE   | not DE   | not DE  |
| EVM0018437 | LG14 | hypothetical protein CICLE_v1 | not DE   | not DE   | not DE   | not DE  |
| EVM0004842 | LG14 | hypothetical protein CICLE_v1 | not DE   | not DE   | not DE   | not DE  |
| EVM0011749 | LG14 | hypothetical protein CICLE_v1 | not DE   | not DE   | not DE   | not DE  |
| EVM0017516 | LG14 | hypothetical protein CICLE_v1 | not DE   | not DE   | not DE   | not DE  |
| EVM0008145 | LG14 | hypothetical protein CICLE_v1 | 5.346662 | 0.001831 | 4.223244 | 0.00024 |
| EVM0023160 | LG14 | hypothetical protein CICLE_v1 | not DE   | not DE   | not DE   | not DE  |
| EVM0022359 | LG14 | hypothetical protein CICLE_v1 | not DE   | not DE   | not DE   | not DE  |
| EVM0006801 | LG14 | hypothetical protein CICLE_v1 | not DE   | not DE   | not DE   | not DE  |
| EVM0021023 | LG14 | hypothetical protein CICLE_v1 | not DE   | not DE   | not DE   | not DE  |
| EVM0013064 | LG14 | hypothetical protein CICLE_v1 | not DE   | not DE   | not DE   | not DE  |
| EVM0019240 | LG14 | hypothetical protein CICLE_v1 | not DE   | not DE   | not DE   | not DE  |
| EVM0008016 | LG14 | hypothetical protein CICLE_v1 | not DE   | not DE   | not DE   | not DE  |
| EVM0012945 | LG14 | hypothetical protein CICLE_v1 | not DE   | not DE   | not DE   | not DE  |
| EVM0004511 | LG14 | hypothetical protein CICLE_v1 | not DE   | not DE   | not DE   | not DE  |
| EVM0019892 | LG14 | hypothetical protein CICLE_v1 | not DE   | not DE   | not DE   | not DE  |
| EVM0005029 | LG14 | hypothetical protein CICLE_v1 | not DE   | not DE   | not DE   | not DE  |
| EVM0024396 | LG14 | hypothetical protein CICLE_v1 | not DE   | not DE   | not DE   | not DE  |
| EVM0022394 | LG14 | hypothetical protein CICLE_v1 | not DE   | not DE   | not DE   | not DE  |
| EVM0005624 | LG14 | hypothetical protein CICLE_v1 | not DE   | not DE   | not DE   | not DE  |
| EVM0012299 | LG14 | hypothetical protein CICLE_v1 | not DE   | not DE   | not DE   | not DE  |
| EVM0001751 | LG14 | hypothetical protein CICLE_v1 | not DE   | not DE   | not DE   | not DE  |
| EVM0005728 | LG14 | hypothetical protein CICLE_v1 | not DE   | not DE   | not DE   | not DE  |
| EVM0012333 | LG14 | hypothetical protein CICLE_v1 | not DE   | not DE   | not DE   | not DE  |
| EVM0008146 | LG14 | hypothetical protein CICLE_v1 | not DE   | not DE   | not DE   | not DE  |
| EVM0020741 | LG14 | hypothetical protein CICLE_v1 | not DE   | not DE   | not DE   | not DE  |
| EVM0015317 | LG14 | hypothetical protein CICLE_v1 | not DE   | not DE   | not DE   | not DE  |
| EVM0014651 | LG14 | hypothetical protein CICLE_v1 | not DE   | not DE   | not DE   | not DE  |
| EVM0015579 | LG14 | hypothetical protein CICLE_v1 | not DE   | not DE   | not DE   | not DE  |
| EVM0004473 | LG14 | hypothetical protein CICLE_v1 | not DE   | not DE   | -2.06945 | 0.00343 |
| EVM0021318 | LG14 | hypothetical protein CICLE_v1 | not DE   | not DE   | not DE   | not DE  |
| EVM0024538 | LG14 | hypothetical protein CICLE_v1 | not DE   | not DE   | not DE   | not DE  |
| EVM0010980 | LG14 | hypothetical protein CICLE_v1 | not DE   | not DE   | not DE   | not DE  |
| EVM0010556 | LG14 | hypothetical protein CICLE_v1 | not DE   | not DE   | not DE   | not DE  |
| EVM0020399 | LG14 | hypothetical protein CICLE_v1 | not DE   | not DE   | not DE   | not DE  |
| EVM0022294 | LG14 | hypothetical protein CICLE_v1 | not DE   | not DE   | not DE   | not DE  |
| EVM0011363 | LG14 | hypothetical protein CICLE_v1 | not DE   | not DE   | not DE   | not DE  |
| EVM0011918 | LG14 | hypothetical protein CICLE_v1 | not DE   | not DE   | not DE   | not DE  |
| EVM0012568 | LG14 | hypothetical protein CICLE_v1 | not DE   | not DE   | not DE   | not DE  |
| EVM0010467 | LG14 | hypothetical protein CICLE_v1 | not DE   | not DE   | not DE   | not DE  |

|            |      |                               |          |          |          |         |
|------------|------|-------------------------------|----------|----------|----------|---------|
| EVM0019589 | LG14 | hypothetical protein CICLE_v1 | not DE   | not DE   | not DE   | not DE  |
| EVM0018160 | LG14 | hypothetical protein CICLE_v1 | not DE   | not DE   | not DE   | not DE  |
| EVM0001348 | LG14 | hypothetical protein CICLE_v1 | not DE   | not DE   | not DE   | not DE  |
| EVM0009031 | LG14 | hypothetical protein CICLE_v1 | not DE   | not DE   | not DE   | not DE  |
| EVM0006798 | LG14 | hypothetical protein CICLE_v1 | not DE   | not DE   | not DE   | not DE  |
| EVM0009427 | LG14 | hypothetical protein CICLE_v1 | not DE   | not DE   | not DE   | not DE  |
| EVM0001049 | LG14 | hypothetical protein CICLE_v1 | not DE   | not DE   | not DE   | not DE  |
| EVM0023562 | LG14 | hypothetical protein CICLE_v1 | not DE   | not DE   | not DE   | not DE  |
| EVM0001120 | LG14 | hypothetical protein CICLE_v1 | 2.311809 | 5.68E-06 | 2.608858 | 0.00042 |
| EVM0001517 | LG14 | hypothetical protein CICLE_v1 | not DE   | not DE   | not DE   | not DE  |
| EVM0009600 | LG14 | hypothetical protein CICLE_v1 | not DE   | not DE   | not DE   | not DE  |
| EVM0016563 | LG14 | hypothetical protein CICLE_v1 | not DE   | not DE   | not DE   | not DE  |
| EVM0005188 | LG14 | hypothetical protein CICLE_v1 | not DE   | not DE   | not DE   | not DE  |
| EVM0014485 | LG14 | hypothetical protein CICLE_v1 | not DE   | not DE   | not DE   | not DE  |
| EVM0023465 | LG14 | hypothetical protein CICLE_v1 | not DE   | not DE   | not DE   | not DE  |
| EVM0016581 | LG14 | hypothetical protein CICLE_v1 | not DE   | not DE   | not DE   | not DE  |
| EVM0002991 | LG14 | hypothetical protein CICLE_v1 | not DE   | not DE   | not DE   | not DE  |
| EVM0015113 | LG14 | hypothetical protein CICLE_v1 | not DE   | not DE   | not DE   | not DE  |
| EVM0014113 | LG14 | hypothetical protein CICLE_v1 | not DE   | not DE   | not DE   | not DE  |
| EVM0015869 | LG14 | hypothetical protein CICLE_v1 | not DE   | not DE   | not DE   | not DE  |
| EVM0007886 | LG14 | hypothetical protein CICLE_v1 | not DE   | not DE   | not DE   | not DE  |
| EVM0001233 | LG14 | hypothetical protein CICLE_v1 | not DE   | not DE   | not DE   | not DE  |
| EVM0023498 | LG14 | hypothetical protein CICLE_v1 | not DE   | not DE   | not DE   | not DE  |
| EVM0019353 | LG14 | hypothetical protein CICLE_v1 | not DE   | not DE   | not DE   | not DE  |
| EVM0004023 | LG14 | hypothetical protein CICLE_v1 | not DE   | not DE   | not DE   | not DE  |
| EVM0015632 | LG14 | hypothetical protein CICLE_v1 | not DE   | not DE   | not DE   | not DE  |
| EVM0021549 | LG14 | hypothetical protein CICLE_v1 | not DE   | not DE   | not DE   | not DE  |
| EVM0009094 | LG14 | hypothetical protein CICLE_v1 | not DE   | not DE   | not DE   | not DE  |
| EVM0017508 | LG14 | hypothetical protein CICLE_v1 | not DE   | not DE   | not DE   | not DE  |
| EVM0007109 | LG14 | hypothetical protein CICLE_v1 | not DE   | not DE   | not DE   | not DE  |
| EVM0001788 | LG14 | hypothetical protein CICLE_v1 | not DE   | not DE   | not DE   | not DE  |
| EVM0018894 | LG14 | hypothetical protein CICLE_v1 | not DE   | not DE   | not DE   | not DE  |
| EVM0002112 | LG14 | hypothetical protein CICLE_v1 | not DE   | not DE   | not DE   | not DE  |
| EVM0016468 | LG14 | hypothetical protein CICLE_v1 | not DE   | not DE   | -1.40885 | #####   |
| EVM0006063 | LG14 | hypothetical protein CICLE_v1 | not DE   | not DE   | not DE   | not DE  |
| EVM0003281 | LG14 | hypothetical protein CICLE_v1 | not DE   | not DE   | not DE   | not DE  |
| EVM0006595 | LG14 | hypothetical protein CICLE_v1 | not DE   | not DE   | not DE   | not DE  |
| EVM0023896 | LG14 | hypothetical protein CICLE_v1 | not DE   | not DE   | not DE   | not DE  |
| EVM0003291 | LG14 | hypothetical protein CICLE_v1 | not DE   | not DE   | not DE   | not DE  |
| EVM0006606 | LG14 | hypothetical protein CICLE_v1 | not DE   | not DE   | not DE   | not DE  |
| EVM0008604 | LG14 | hypothetical protein CICLE_v1 | not DE   | not DE   | not DE   | not DE  |
| EVM0009551 | LG14 | hypothetical protein CICLE_v1 | not DE   | not DE   | not DE   | not DE  |
| EVM0013638 | LG14 | hypothetical protein CISIN_1g | not DE   | not DE   | -1.15174 | #####   |
| EVM0012651 | LG14 | hypothetical protein CISIN_1g | not DE   | not DE   | not DE   | not DE  |
| EVM0020956 | LG14 | hypothetical protein CISIN_1g | not DE   | not DE   | not DE   | not DE  |
| EVM0000308 | LG14 | hypothetical protein CISIN_1g | not DE   | not DE   | not DE   | not DE  |
| EVM0015587 | LG14 | hypothetical protein CISIN_1g | not DE   | not DE   | not DE   | not DE  |
| EVM0000732 | LG14 | hypothetical protein CISIN_1g | not DE   | not DE   | not DE   | not DE  |
| EVM0020875 | LG14 | hypothetical protein CISIN_1g | not DE   | not DE   | not DE   | not DE  |
| EVM0009588 | LG14 | hypothetical protein CISIN_1g | not DE   | not DE   | not DE   | not DE  |
| EVM0010910 | LG14 | hypothetical protein CISIN_1g | not DE   | not DE   | not DE   | not DE  |
| EVM0021613 | LG14 | hypothetical protein CISIN_1g | not DE   | not DE   | not DE   | not DE  |
| EVM0010106 | LG14 | hypothetical protein CISIN_1g | not DE   | not DE   | not DE   | not DE  |
| EVM0010958 | LG14 | hypothetical protein CISIN_1g | 1.925232 | 0.037681 | not DE   | not DE  |

|            |      |                               |          |          |          |         |
|------------|------|-------------------------------|----------|----------|----------|---------|
| EVM0018292 | LG14 | hypothetical protein CISIN_1g | not DE   | not DE   | not DE   | not DE  |
| EVM0004290 | LG14 | hypothetical protein CISIN_1g | not DE   | not DE   | not DE   | not DE  |
| EVM0021025 | LG14 | hypothetical protein CISIN_1g | not DE   | not DE   | not DE   | not DE  |
| EVM0022334 | LG14 | hypothetical protein CISIN_1g | not DE   | not DE   | not DE   | not DE  |
| EVM0018827 | LG14 | hypothetical protein CISIN_1g | not DE   | not DE   | not DE   | not DE  |
| EVM0022353 | LG14 | hypothetical protein CISIN_1g | not DE   | not DE   | 2.606671 | 0.02674 |
| EVM0005917 | LG14 | hypothetical protein CISIN_1g | not DE   | not DE   | not DE   | not DE  |
| EVM0004922 | LG14 | hypothetical protein CISIN_1g | 3.066928 | 0.04194  | not DE   | not DE  |
| EVM0013920 | LG14 | hypothetical protein CISIN_1g | not DE   | not DE   | not DE   | not DE  |
| EVM0008530 | LG14 | hypothetical protein CISIN_1g | not DE   | not DE   | not DE   | not DE  |
| EVM0022636 | LG14 | hypothetical protein CISIN_1g | not DE   | not DE   | not DE   | not DE  |
| EVM0003128 | LG14 | hypothetical protein CISIN_1g | not DE   | not DE   | -1.25776 | 0.04476 |
| EVM0005612 | LG14 | hypothetical protein CISIN_1g | not DE   | not DE   | not DE   | not DE  |
| EVM0005820 | LG14 | hypothetical protein CISIN_1g | not DE   | not DE   | not DE   | not DE  |
| EVM0002022 | LG14 | hypothetical protein CISIN_1g | not DE   | not DE   | not DE   | not DE  |
| EVM0006898 | LG14 | hypothetical protein CISIN_1g | not DE   | not DE   | not DE   | not DE  |
| EVM0000762 | LG14 | hypothetical protein CISIN_1g | not DE   | not DE   | not DE   | not DE  |
| EVM0008754 | LG14 | hypothetical protein CISIN_1g | 1.200476 | 0.041873 | not DE   | not DE  |
| EVM0021105 | LG14 | hypothetical protein CISIN_1g | not DE   | not DE   | not DE   | not DE  |
| EVM0005239 | LG14 | hypothetical protein CISIN_1g | not DE   | not DE   | not DE   | not DE  |
| EVM0019380 | LG14 | hypothetical protein CISIN_1g | not DE   | not DE   | not DE   | not DE  |
| EVM0021061 | LG14 | hypothetical protein CISIN_1g | not DE   | not DE   | not DE   | not DE  |
| EVM0008582 | LG14 | hypothetical protein CISIN_1g | not DE   | not DE   | not DE   | not DE  |
| EVM0008708 | LG14 | hypothetical protein CISIN_1g | not DE   | not DE   | not DE   | not DE  |
| EVM0023204 | LG14 | hypothetical protein CISIN_1g | not DE   | not DE   | not DE   | not DE  |
| EVM0010095 | LG14 | hypothetical protein CISIN_1g | not DE   | not DE   | not DE   | not DE  |
| EVM0023257 | LG14 | hypothetical protein CISIN_1g | not DE   | not DE   | not DE   | not DE  |
| EVM0003242 | LG14 | hypothetical protein CISIN_1g | not DE   | not DE   | not DE   | not DE  |
| EVM0017850 | LG14 | hypothetical protein CISIN_1g | not DE   | not DE   | not DE   | not DE  |
| EVM0007613 | LG14 | hypothetical protein CISIN_1g | not DE   | not DE   | not DE   | not DE  |
| EVM0000863 | LG14 | hypothetical protein CISIN_1g | not DE   | not DE   | not DE   | not DE  |
| EVM0017580 | LG14 | hypothetical protein CISIN_1g | not DE   | not DE   | not DE   | not DE  |
| EVM0003289 | LG14 | hypothetical protein CISIN_1g | not DE   | not DE   | not DE   | not DE  |
| EVM0021791 | LG14 | hypothetical protein CISIN_1g | not DE   | not DE   | not DE   | not DE  |
| EVM0000716 | LG14 | hypothetical protein CISIN_1g | not DE   | not DE   | not DE   | not DE  |
| EVM0013210 | LG14 | hypothetical protein CISIN_1g | not DE   | not DE   | not DE   | not DE  |
| EVM0012562 | LG14 | hypothetical protein CISIN_1g | not DE   | not DE   | not DE   | not DE  |
| EVM0020168 | LG14 | hypothetical protein CISIN_1g | not DE   | not DE   | not DE   | not DE  |
| EVM0021242 | LG14 | hypothetical protein CISIN_1g | not DE   | not DE   | not DE   | not DE  |
| EVM0009342 | LG14 | hypothetical protein CISIN_1g | not DE   | not DE   | not DE   | not DE  |
| EVM0005878 | LG14 | hypothetical protein CISIN_1g | not DE   | not DE   | not DE   | not DE  |
| EVM0001249 | LG14 | hypothetical protein CISIN_1g | 1.982156 | 0.040503 | not DE   | not DE  |
| EVM0010417 | LG14 | hypothetical protein CISIN_1g | not DE   | not DE   | not DE   | not DE  |
| EVM0000045 | LG14 | hypothetical protein CISIN_1g | not DE   | not DE   | not DE   | not DE  |
| EVM0007500 | LG14 | hypothetical protein CISIN_1g | not DE   | not DE   | not DE   | not DE  |
| EVM0006611 | LG14 | hypothetical protein CISIN_1g | not DE   | not DE   | not DE   | not DE  |
| EVM0001183 | LG14 | hypothetical protein CISIN_1g | not DE   | not DE   | not DE   | not DE  |
| EVM0018990 | LG14 | hypothetical protein CISIN_1g | not DE   | not DE   | not DE   | not DE  |
| EVM0020826 | LG14 | hypothetical protein CISIN_1g | not DE   | not DE   | not DE   | not DE  |
| EVM0015007 | LG14 | hypothetical protein CISIN_1g | not DE   | not DE   | not DE   | not DE  |
| EVM0018958 | LG14 | hypothetical protein CISIN_1g | not DE   | not DE   | not DE   | not DE  |
| EVM0019608 | LG14 | hypothetical protein CISIN_1g | not DE   | not DE   | not DE   | not DE  |
| EVM0023414 | LG14 | hypothetical protein CISIN_1g | not DE   | not DE   | not DE   | not DE  |
| EVM0000622 | LG14 | hypothetical protein CISIN_1g | not DE   | not DE   | not DE   | not DE  |

|            |      |                               |          |          |          |         |
|------------|------|-------------------------------|----------|----------|----------|---------|
| EVM0017638 | LG14 | hypothetical protein CISIN_1g | not DE   | not DE   | not DE   | not DE  |
| EVM0006737 | LG14 | hypothetical protein CISIN_1g | not DE   | not DE   | not DE   | not DE  |
| EVM0024098 | LG14 | hypothetical protein CISIN_1g | not DE   | not DE   | 1.254489 | 0.02054 |
| EVM0017692 | LG14 | hypothetical protein CISIN_1g | not DE   | not DE   | not DE   | not DE  |
| EVM0004046 | LG14 | hypothetical protein CISIN_1g | not DE   | not DE   | not DE   | not DE  |
| EVM0002188 | LG14 | hypothetical protein CISIN_1g | not DE   | not DE   | not DE   | not DE  |
| EVM0012887 | LG14 | hypothetical protein CISIN_1g | not DE   | not DE   | not DE   | not DE  |
| EVM0012982 | LG14 | hypothetical protein CISIN_1g | not DE   | not DE   | not DE   | not DE  |
| EVM0016198 | LG14 | hypothetical protein CISIN_1g | not DE   | not DE   | not DE   | not DE  |
| EVM0012203 | LG14 | hypothetical protein CISIN_1g | not DE   | not DE   | not DE   | not DE  |
| EVM0003111 | LG14 | hypothetical protein CISIN_1g | not DE   | not DE   | not DE   | not DE  |
| EVM0013783 | LG14 | hypothetical protein CISIN_1g | -1.99204 | 2.04E-05 | not DE   | not DE  |
| EVM0000500 | LG14 | hypothetical protein CISIN_1g | not DE   | not DE   | not DE   | not DE  |
| EVM0014830 | LG14 | hypothetical protein CISIN_1g | not DE   | not DE   | not DE   | not DE  |
| EVM0022221 | LG14 | hypothetical protein CISIN_1g | not DE   | not DE   | not DE   | not DE  |
| EVM0021254 | LG14 | hypothetical protein CISIN_1g | not DE   | not DE   | not DE   | not DE  |
| EVM0012983 | LG14 | hypothetical protein CISIN_1g | not DE   | not DE   | not DE   | not DE  |
| EVM0013917 | LG14 | hypothetical protein CISIN_1g | not DE   | not DE   | not DE   | not DE  |
| EVM0004910 | LG14 | hypothetical protein CISIN_1g | not DE   | not DE   | 1.7368   | 0.00435 |
| EVM0007452 | LG14 | hypothetical protein CISIN_1g | not DE   | not DE   | not DE   | not DE  |
| EVM0018732 | LG14 | hypothetical protein CISIN_1g | not DE   | not DE   | not DE   | not DE  |
| EVM0013746 | LG14 | hypothetical protein CISIN_1g | not DE   | not DE   | not DE   | not DE  |
| EVM0004974 | LG14 | hypothetical protein CISIN_1g | not DE   | not DE   | not DE   | not DE  |
| EVM0017686 | LG14 | hypothetical protein CISIN_1g | not DE   | not DE   | not DE   | not DE  |
| EVM0008836 | LG14 | hypothetical protein CISIN_1g | not DE   | not DE   | not DE   | not DE  |
| EVM0010020 | LG14 | hypothetical protein CISIN_1g | not DE   | not DE   | not DE   | not DE  |
| EVM0012782 | LG14 | hypothetical protein CISIN_1g | not DE   | not DE   | not DE   | not DE  |
| EVM0006186 | LG14 | hypothetical protein CISIN_1g | not DE   | not DE   | not DE   | not DE  |
| EVM0017440 | LG14 | hypothetical protein CISIN_1g | not DE   | not DE   | not DE   | not DE  |
| EVM0023326 | LG14 | hypothetical protein CISIN_1g | not DE   | not DE   | not DE   | not DE  |
| EVM0020143 | LG14 | hypothetical protein CISIN_1g | not DE   | not DE   | not DE   | not DE  |
| EVM0009731 | LG14 | hypothetical protein CISIN_1g | not DE   | not DE   | not DE   | not DE  |
| EVM0024647 | LG14 | hypothetical protein CISIN_1g | not DE   | not DE   | not DE   | not DE  |
| EVM0022714 | LG14 | hypothetical protein CISIN_1g | not DE   | not DE   | not DE   | not DE  |
| EVM0003390 | LG14 | hypothetical protein CISIN_1g | not DE   | not DE   | not DE   | not DE  |
| EVM0024322 | LG14 | hypothetical protein CISIN_1g | not DE   | not DE   | not DE   | not DE  |
| EVM0005291 | LG14 | hypothetical protein CISIN_1g | not DE   | not DE   | not DE   | not DE  |
| EVM0009429 | LG14 | hypothetical protein CISIN_1g | not DE   | not DE   | not DE   | not DE  |
| EVM0014145 | LG14 | hypothetical protein CISIN_1g | not DE   | not DE   | not DE   | not DE  |
| EVM0019719 | LG14 | hypothetical protein CISIN_1g | not DE   | not DE   | not DE   | not DE  |
| EVM0016910 | LG14 | hypothetical protein CISIN_1g | not DE   | not DE   | not DE   | not DE  |
| EVM0002789 | LG14 | hypothetical protein CISIN_1g | not DE   | not DE   | not DE   | not DE  |
| EVM0000044 | LG14 | hypothetical protein CISIN_1g | not DE   | not DE   | not DE   | not DE  |
| EVM0005303 | LG14 | hypothetical protein CISIN_1g | not DE   | not DE   | not DE   | not DE  |
| EVM0005472 | LG14 | hypothetical protein CISIN_1g | not DE   | not DE   | not DE   | not DE  |
| EVM0007509 | LG14 | hypothetical protein CISIN_1g | not DE   | not DE   | not DE   | not DE  |
| EVM0007770 | LG14 | hypothetical protein CISIN_1g | not DE   | not DE   | not DE   | not DE  |
| EVM0017569 | LG14 | hypothetical protein CISIN_1g | -2.94823 | 1.50E-06 | not DE   | not DE  |
| EVM0018221 | LG14 | hypothetical protein Csa_3G07 | not DE   | not DE   | not DE   | not DE  |
| EVM0006702 | LG14 | hypothetical protein EUGRSUZ_ | not DE   | not DE   | 1.791647 | #####   |
| EVM0002497 | LG14 | hypothetical protein EUTSA_v1 | not DE   | not DE   | not DE   | not DE  |
| EVM0002908 | LG14 | hypothetical protein F383_112 | not DE   | not DE   | not DE   | not DE  |
| EVM0000380 | LG14 | hypothetical protein F383_116 | 1.308106 | 0.038508 | 1.544848 | 0.00375 |
| EVM0006171 | LG14 | hypothetical protein F383_116 | not DE   | not DE   | not DE   | not DE  |



|            |      |                               |          |          |          |         |
|------------|------|-------------------------------|----------|----------|----------|---------|
| EVM0012441 | LG14 | hypothetical protein JCGZ_005 | not DE   | not DE   | not DE   | not DE  |
| EVM0022874 | LG14 | hypothetical protein JCGZ_007 | not DE   | not DE   | not DE   | not DE  |
| EVM0016314 | LG14 | hypothetical protein JCGZ_007 | not DE   | not DE   | not DE   | not DE  |
| EVM0008998 | LG14 | hypothetical protein JCGZ_007 | not DE   | not DE   | -1.94602 | 0.02818 |
| EVM0013334 | LG14 | hypothetical protein JCGZ_007 | not DE   | not DE   | not DE   | not DE  |
| EVM0006571 | LG14 | hypothetical protein JCGZ_008 | not DE   | not DE   | not DE   | not DE  |
| EVM0018627 | LG14 | hypothetical protein JCGZ_008 | not DE   | not DE   | not DE   | not DE  |
| EVM0003060 | LG14 | hypothetical protein JCGZ_008 | not DE   | not DE   | not DE   | not DE  |
| EVM0005748 | LG14 | hypothetical protein JCGZ_008 | not DE   | not DE   | not DE   | not DE  |
| EVM0011294 | LG14 | hypothetical protein JCGZ_008 | not DE   | not DE   | not DE   | not DE  |
| EVM0010866 | LG14 | hypothetical protein JCGZ_009 | not DE   | not DE   | not DE   | not DE  |
| EVM0022048 | LG14 | hypothetical protein JCGZ_009 | not DE   | not DE   | not DE   | not DE  |
| EVM0008665 | LG14 | hypothetical protein JCGZ_010 | not DE   | not DE   | not DE   | not DE  |
| EVM0005710 | LG14 | hypothetical protein JCGZ_010 | not DE   | not DE   | not DE   | not DE  |
| EVM0014033 | LG14 | hypothetical protein JCGZ_010 | not DE   | not DE   | not DE   | not DE  |
| EVM0020844 | LG14 | hypothetical protein JCGZ_030 | not DE   | not DE   | not DE   | not DE  |
| EVM0009877 | LG14 | hypothetical protein JCGZ_087 | not DE   | not DE   | not DE   | not DE  |
| EVM0012436 | LG14 | hypothetical protein JCGZ_098 | not DE   | not DE   | not DE   | not DE  |
| EVM0010823 | LG14 | hypothetical protein JCGZ_119 | not DE   | not DE   | not DE   | not DE  |
| EVM0021754 | LG14 | hypothetical protein JCGZ_134 | not DE   | not DE   | not DE   | not DE  |
| EVM0007838 | LG14 | hypothetical protein JCGZ_139 | not DE   | not DE   | not DE   | not DE  |
| EVM0000942 | LG14 | hypothetical protein JCGZ_147 | not DE   | not DE   | not DE   | not DE  |
| EVM0003587 | LG14 | hypothetical protein JCGZ_147 | not DE   | not DE   | not DE   | not DE  |
| EVM0006002 | LG14 | hypothetical protein JCGZ_147 | not DE   | not DE   | not DE   | not DE  |
| EVM0007899 | LG14 | hypothetical protein JCGZ_147 | not DE   | not DE   | not DE   | not DE  |
| EVM0010433 | LG14 | hypothetical protein JCGZ_147 | not DE   | not DE   | not DE   | not DE  |
| EVM0015440 | LG14 | hypothetical protein JCGZ_147 | not DE   | not DE   | not DE   | not DE  |
| EVM0016368 | LG14 | hypothetical protein JCGZ_147 | not DE   | not DE   | not DE   | not DE  |
| EVM0017513 | LG14 | hypothetical protein JCGZ_147 | not DE   | not DE   | not DE   | not DE  |
| EVM0021653 | LG14 | hypothetical protein JCGZ_147 | not DE   | not DE   | not DE   | not DE  |
| EVM0021657 | LG14 | hypothetical protein JCGZ_147 | not DE   | not DE   | not DE   | not DE  |
| EVM0001199 | LG14 | hypothetical protein JCGZ_147 | not DE   | not DE   | not DE   | not DE  |
| EVM0018853 | LG14 | hypothetical protein JCGZ_147 | not DE   | not DE   | not DE   | not DE  |
| EVM0011763 | LG14 | hypothetical protein JCGZ_161 | not DE   | not DE   | not DE   | not DE  |
| EVM0016397 | LG14 | hypothetical protein JCGZ_170 | not DE   | not DE   | -3.97867 | 0.00626 |
| EVM0017230 | LG14 | hypothetical protein JCGZ_170 | not DE   | not DE   | not DE   | not DE  |
| EVM0009647 | LG14 | hypothetical protein JCGZ_171 | not DE   | not DE   | not DE   | not DE  |
| EVM0004602 | LG14 | hypothetical protein JCGZ_183 | not DE   | not DE   | not DE   | not DE  |
| EVM0014506 | LG14 | hypothetical protein JCGZ_201 | not DE   | not DE   | not DE   | not DE  |
| EVM0003582 | LG14 | hypothetical protein JCGZ_201 | not DE   | not DE   | not DE   | not DE  |
| EVM0004385 | LG14 | hypothetical protein JCGZ_201 | not DE   | not DE   | not DE   | not DE  |
| EVM0018844 | LG14 | hypothetical protein JCGZ_201 | not DE   | not DE   | not DE   | not DE  |
| EVM0023798 | LG14 | hypothetical protein JCGZ_201 | not DE   | not DE   | not DE   | not DE  |
| EVM0016365 | LG14 | hypothetical protein JCGZ_201 | not DE   | not DE   | not DE   | not DE  |
| EVM0023920 | LG14 | hypothetical protein JCGZ_201 | not DE   | not DE   | not DE   | not DE  |
| EVM0010444 | LG14 | hypothetical protein JCGZ_201 | not DE   | not DE   | not DE   | not DE  |
| EVM0010309 | LG14 | hypothetical protein JCGZ_203 | 1.697848 | 0.018013 | not DE   | not DE  |
| EVM0022081 | LG14 | hypothetical protein JCGZ_208 | not DE   | not DE   | not DE   | not DE  |
| EVM0014438 | LG14 | hypothetical protein JCGZ_208 | not DE   | not DE   | not DE   | not DE  |
| EVM0004741 | LG14 | hypothetical protein JCGZ_209 | not DE   | not DE   | not DE   | not DE  |
| EVM0000087 | LG14 | hypothetical protein JCGZ_209 | not DE   | not DE   | not DE   | not DE  |
| EVM0009959 | LG14 | hypothetical protein JCGZ_209 | not DE   | not DE   | not DE   | not DE  |
| EVM0007705 | LG14 | hypothetical protein JCGZ_215 | not DE   | not DE   | not DE   | not DE  |
| EVM0015940 | LG14 | hypothetical protein JCGZ_215 | not DE   | not DE   | -3.01287 | 0.00175 |

|            |      |                               |          |          |          |         |
|------------|------|-------------------------------|----------|----------|----------|---------|
| EVM0020338 | LG14 | hypothetical protein JCGZ_256 | not DE   | not DE   | not DE   | not DE  |
| EVM0021051 | LG14 | hypothetical protein L484_000 | not DE   | not DE   | not DE   | not DE  |
| EVM0010536 | LG14 | hypothetical protein L484_006 | not DE   | not DE   | not DE   | not DE  |
| EVM0015670 | LG14 | hypothetical protein L484_011 | not DE   | not DE   | not DE   | not DE  |
| EVM0017530 | LG14 | hypothetical protein L484_012 | not DE   | not DE   | not DE   | not DE  |
| EVM0003481 | LG14 | hypothetical protein L484_017 | not DE   | not DE   | not DE   | not DE  |
| EVM0013587 | LG14 | hypothetical protein MIMGU_mg | not DE   | not DE   | not DE   | not DE  |
| EVM0019398 | LG14 | hypothetical protein MIMGU_mg | not DE   | not DE   | not DE   | not DE  |
| EVM0020130 | LG14 | hypothetical protein PHAVU_00 | not DE   | not DE   | not DE   | not DE  |
| EVM0022418 | LG14 | hypothetical protein POPTR_00 | not DE   | not DE   | not DE   | not DE  |
| EVM0001038 | LG14 | hypothetical protein POPTR_00 | not DE   | not DE   | not DE   | not DE  |
| EVM0019305 | LG14 | hypothetical protein POPTR_00 | not DE   | not DE   | not DE   | not DE  |
| EVM0008164 | LG14 | hypothetical protein POPTR_00 | not DE   | not DE   | not DE   | not DE  |
| EVM0004743 | LG14 | hypothetical protein POPTR_00 | not DE   | not DE   | not DE   | not DE  |
| EVM0007603 | LG14 | hypothetical protein POPTR_00 | not DE   | not DE   | not DE   | not DE  |
| EVM0009224 | LG14 | hypothetical protein POPTR_00 | not DE   | not DE   | not DE   | not DE  |
| EVM0012924 | LG14 | hypothetical protein POPTR_00 | not DE   | not DE   | not DE   | not DE  |
| EVM0010654 | LG14 | hypothetical protein POPTR_00 | not DE   | not DE   | not DE   | not DE  |
| EVM0014304 | LG14 | hypothetical protein POPTR_00 | not DE   | not DE   | not DE   | not DE  |
| EVM0016937 | LG14 | hypothetical protein POPTR_00 | not DE   | not DE   | not DE   | not DE  |
| EVM0018318 | LG14 | hypothetical protein POPTR_00 | not DE   | not DE   | not DE   | not DE  |
| EVM0008749 | LG14 | hypothetical protein POPTR_00 | not DE   | not DE   | not DE   | not DE  |
| EVM0012176 | LG14 | hypothetical protein POPTR_00 | not DE   | not DE   | 1.547501 | 0.03171 |
| EVM0006153 | LG14 | hypothetical protein POPTR_00 | not DE   | not DE   | not DE   | not DE  |
| EVM0012636 | LG14 | hypothetical protein POPTR_00 | not DE   | not DE   | not DE   | not DE  |
| EVM0003702 | LG14 | hypothetical protein POPTR_00 | 2.144418 | 0.002797 | not DE   | not DE  |
| EVM0017116 | LG14 | hypothetical protein POPTR_00 | not DE   | not DE   | not DE   | not DE  |
| EVM0003286 | LG14 | hypothetical protein POPTR_00 | not DE   | not DE   | not DE   | not DE  |
| EVM0004604 | LG14 | hypothetical protein POPTR_00 | not DE   | not DE   | not DE   | not DE  |
| EVM0013579 | LG14 | hypothetical protein POPTR_00 | not DE   | not DE   | not DE   | not DE  |
| EVM0010614 | LG14 | hypothetical protein POPTR_00 | not DE   | not DE   | -2.33342 | 0.00168 |
| EVM0002954 | LG14 | hypothetical protein POPTR_00 | not DE   | not DE   | not DE   | not DE  |
| EVM0023982 | LG14 | hypothetical protein POPTR_00 | not DE   | not DE   | not DE   | not DE  |
| EVM0024343 | LG14 | hypothetical protein POPTR_00 | not DE   | not DE   | not DE   | not DE  |
| EVM0020459 | LG14 | hypothetical protein POPTR_00 | not DE   | not DE   | not DE   | not DE  |
| EVM0005146 | LG14 | hypothetical protein POPTR_00 | not DE   | not DE   | not DE   | not DE  |
| EVM0024319 | LG14 | hypothetical protein POPTR_00 | not DE   | not DE   | not DE   | not DE  |
| EVM0000901 | LG14 | hypothetical protein POPTR_00 | not DE   | not DE   | not DE   | not DE  |
| EVM0002892 | LG14 | hypothetical protein POPTR_00 | not DE   | not DE   | not DE   | not DE  |
| EVM0019991 | LG14 | hypothetical protein POPTR_00 | not DE   | not DE   | not DE   | not DE  |
| EVM0024136 | LG14 | hypothetical protein POPTR_00 | not DE   | not DE   | not DE   | not DE  |
| EVM0012356 | LG14 | hypothetical protein PRUPE_pp | not DE   | not DE   | not DE   | not DE  |
| EVM0003753 | LG14 | hypothetical protein PRUPE_pp | not DE   | not DE   | not DE   | not DE  |
| EVM0023119 | LG14 | hypothetical protein PRUPE_pp | not DE   | not DE   | not DE   | not DE  |
| EVM0008422 | LG14 | hypothetical protein PRUPE_pp | not DE   | not DE   | not DE   | not DE  |
| EVM0017910 | LG14 | hypothetical protein PRUPE_pp | not DE   | not DE   | not DE   | not DE  |
| EVM0011537 | LG14 | hypothetical protein PRUPE_pp | not DE   | not DE   | not DE   | not DE  |
| EVM0002249 | LG14 | hypothetical protein PRUPE_pp | not DE   | not DE   | not DE   | not DE  |
| EVM0008580 | LG14 | hypothetical protein PRUPE_pp | not DE   | not DE   | not DE   | not DE  |
| EVM0017620 | LG14 | hypothetical protein PRUPE_pp | not DE   | not DE   | not DE   | not DE  |
| EVM0011364 | LG14 | hypothetical protein PRUPE_pp | not DE   | not DE   | not DE   | not DE  |
| EVM0011571 | LG14 | hypothetical protein PRUPE_pp | not DE   | not DE   | not DE   | not DE  |
| EVM0011759 | LG14 | hypothetical protein RCOM_058 | not DE   | not DE   | not DE   | not DE  |
| EVM0018856 | LG14 | hypothetical protein VITISV_C | not DE   | not DE   | not DE   | not DE  |

|            |      |                               |          |          |          |         |
|------------|------|-------------------------------|----------|----------|----------|---------|
| EVM0022732 | LG14 | hypothetical protein VITISV_C | not DE   | not DE   | not DE   | not DE  |
| EVM0003553 | LG14 | hypothetical protein VITISV_C | not DE   | not DE   | not DE   | not DE  |
| EVM0008885 | LG14 | hypothetical protein VITISV_C | not DE   | not DE   | not DE   | not DE  |
| EVM0016213 | LG14 | hypothetical protein VITISV_C | not DE   | not DE   | not DE   | not DE  |
| EVM0018818 | LG14 | hypothetical protein VITISV_C | not DE   | not DE   | not DE   | not DE  |
| EVM0015072 | LG14 | hypothetical protein VITISV_C | not DE   | not DE   | not DE   | not DE  |
| EVM0021492 | LG14 | hypothetical protein VITISV_C | not DE   | not DE   | not DE   | not DE  |
| EVM0017040 | LG14 | importin beta-1, putative     | not DE   | not DE   | not DE   | not DE  |
| EVM0003693 | LG14 | lateral                       | not DE   | not DE   | not DE   | not DE  |
| EVM0005168 | LG14 | leucine-rich repeat containin | not DE   | not DE   | not DE   | not DE  |
| EVM0008611 | LG14 | leucine-rich repeat containin | not DE   | not DE   | not DE   | not DE  |
| EVM0010537 | LG14 | leucine-rich repeat containin | not DE   | not DE   | not DE   | not DE  |
| EVM0013885 | LG14 | leucine-rich repeat containin | not DE   | not DE   | not DE   | not DE  |
| EVM0022667 | LG14 | mitochondrial import inner me | not DE   | not DE   | not DE   | not DE  |
| EVM0002357 | LG14 | n6-DNA-methyltransferase, put | not DE   | not DE   | not DE   | not DE  |
| EVM0014087 | LG14 | o-methyltransferase, putative | not DE   | not DE   | not DE   | not DE  |
| EVM0006228 | LG14 | phosphatase 2C family protein | not DE   | not DE   | not DE   | not DE  |
| EVM0008873 | LG14 | phosphatase 2C family protein | not DE   | not DE   | not DE   | not DE  |
| EVM0013204 | LG14 | photosystem II protein K (chl | not DE   | not DE   | not DE   | not DE  |
| EVM0004621 | LG14 | pollen Ole e 1 allergen and e | not DE   | not DE   | not DE   | not DE  |
| EVM0015647 | LG14 | pollen Ole e 1 allergen and e | not DE   | not DE   | not DE   | not DE  |
| EVM0004906 | LG14 | polyprotein                   | not DE   | not DE   | not DE   | not DE  |
| EVM0006792 | LG14 | polyubiquitin (ubq10)         | not DE   | not DE   | not DE   | not DE  |
| EVM0023236 | LG14 | polyubiquitin (ubq10)         | not DE   | not DE   | not DE   | not DE  |
| EVM0007592 | LG14 | polyubiquitin 3               | not DE   | not DE   | not DE   | not DE  |
| EVM0003666 | LG14 | putative 9-cis-epoxycarotenoi | 3.397423 | 0.002022 | -2.58263 | 0.00534 |
| EVM0013883 | LG14 | putative retroelement pol pol | not DE   | not DE   | not DE   | not DE  |
| EVM0023045 | LG14 | putative serine/threonine-pro | not DE   | not DE   | not DE   | not DE  |
| EVM0014643 | LG14 | retrotransposon protein, puta | not DE   | not DE   | not DE   | not DE  |
| EVM0011777 | LG14 | triptychon and cpc, putative  | not DE   | not DE   | not DE   | not DE  |
| EVM0003334 | LG14 | ubiquitin-conjugating enzyme  | not DE   | not DE   | not DE   | not DE  |
| EVM0014224 | LG14 | uncharacterized protein LOC10 | not DE   | not DE   | not DE   | not DE  |
| EVM0007811 | LG14 | uncharacterized protein LOC10 | not DE   | not DE   | not DE   | not DE  |
| EVM0000999 | LG14 | unknown protein               | not DE   | not DE   | not DE   | not DE  |
| EVM0003032 | LG14 | unknown protein               | not DE   | not DE   | not DE   | not DE  |
| EVM0003669 | LG14 | unknown protein               | not DE   | not DE   | not DE   | not DE  |
| EVM0004959 | LG14 | unknown protein               | not DE   | not DE   | not DE   | not DE  |
| EVM0004965 | LG14 | unknown protein               | not DE   | not DE   | not DE   | not DE  |
| EVM0008180 | LG14 | unknown protein               | not DE   | not DE   | not DE   | not DE  |
| EVM0010120 | LG14 | unknown protein               | not DE   | not DE   | not DE   | not DE  |
| EVM0010203 | LG14 | unknown protein               | not DE   | not DE   | not DE   | not DE  |
| EVM0010552 | LG14 | unknown protein               | not DE   | not DE   | not DE   | not DE  |
| EVM0010701 | LG14 | unknown protein               | not DE   | not DE   | not DE   | not DE  |
| EVM0011290 | LG14 | unknown protein               | not DE   | not DE   | not DE   | not DE  |
| EVM0011341 | LG14 | unknown protein               | not DE   | not DE   | not DE   | not DE  |
| EVM0011703 | LG14 | unknown protein               | not DE   | not DE   | not DE   | not DE  |
| EVM0013391 | LG14 | unknown protein               | not DE   | not DE   | not DE   | not DE  |
| EVM0013978 | LG14 | unknown protein               | not DE   | not DE   | not DE   | not DE  |
| EVM0014422 | LG14 | unknown protein               | not DE   | not DE   | not DE   | not DE  |
| EVM0015991 | LG14 | unknown protein               | not DE   | not DE   | not DE   | not DE  |
| EVM0016149 | LG14 | unknown protein               | not DE   | not DE   | not DE   | not DE  |
| EVM0016662 | LG14 | unknown protein               | not DE   | not DE   | not DE   | not DE  |
| EVM0016778 | LG14 | unknown protein               | not DE   | not DE   | not DE   | not DE  |
| EVM0017182 | LG14 | unknown protein               | not DE   | not DE   | not DE   | not DE  |

|            |      |                              |        |        |          |         |
|------------|------|------------------------------|--------|--------|----------|---------|
| EVM0019745 | LG14 | unknown protein              | not DE | not DE | not DE   | not DE  |
| EVM0021217 | LG14 | unknown protein              | not DE | not DE | not DE   | not DE  |
| EVM0023933 | LG14 | unknown protein              | not DE | not DE | not DE   | not DE  |
| EVM0024154 | LG14 | unknown protein              | not DE | not DE | 1.94697  | 0.00115 |
| EVM0000666 | LG14 | unnamed protein product      | not DE | not DE | not DE   | not DE  |
| EVM0001425 | LG14 | unnamed protein product      | not DE | not DE | not DE   | not DE  |
| EVM0001812 | LG14 | unnamed protein product      | not DE | not DE | not DE   | not DE  |
| EVM0004782 | LG14 | unnamed protein product      | not DE | not DE | not DE   | not DE  |
| EVM0005408 | LG14 | unnamed protein product      | not DE | not DE | not DE   | not DE  |
| EVM0006108 | LG14 | unnamed protein product      | not DE | not DE | not DE   | not DE  |
| EVM0006913 | LG14 | unnamed protein product      | not DE | not DE | not DE   | not DE  |
| EVM0007502 | LG14 | unnamed protein product      | not DE | not DE | not DE   | not DE  |
| EVM0007644 | LG14 | unnamed protein product      | not DE | not DE | not DE   | not DE  |
| EVM0007852 | LG14 | unnamed protein product      | not DE | not DE | not DE   | not DE  |
| EVM0008027 | LG14 | unnamed protein product      | not DE | not DE | not DE   | not DE  |
| EVM0008364 | LG14 | unnamed protein product      | not DE | not DE | not DE   | not DE  |
| EVM0009323 | LG14 | unnamed protein product      | not DE | not DE | not DE   | not DE  |
| EVM0009772 | LG14 | unnamed protein product      | not DE | not DE | not DE   | not DE  |
| EVM0010901 | LG14 | unnamed protein product      | not DE | not DE | not DE   | not DE  |
| EVM0011394 | LG14 | unnamed protein product      | not DE | not DE | not DE   | not DE  |
| EVM0012617 | LG14 | unnamed protein product      | not DE | not DE | not DE   | not DE  |
| EVM0016632 | LG14 | unnamed protein product      | not DE | not DE | not DE   | not DE  |
| EVM0017118 | LG14 | unnamed protein product      | not DE | not DE | not DE   | not DE  |
| EVM0018531 | LG14 | unnamed protein product      | not DE | not DE | not DE   | not DE  |
| EVM0018540 | LG14 | unnamed protein product      | not DE | not DE | not DE   | not DE  |
| EVM0020662 | LG15 | 116 kDa U5 small nuclear rib | not DE | not DE | -1.04823 | #####   |
| EVM0016332 | LG15 | 2-oxoglutarate dehydrogenase | not DE | not DE | not DE   | not DE  |
| EVM0005140 | LG15 | 4-coumarate--CoA ligase-like | not DE | not DE | not DE   | not DE  |
| EVM0009779 | LG15 | 40S ribosomal protein S17-3  | not DE | not DE | not DE   | not DE  |
| EVM0010408 | LG15 | 40S ribosomal protein S17-3  | not DE | not DE | not DE   | not DE  |
| EVM0008142 | LG15 | 40S ribosomal protein S25-li | not DE | not DE | not DE   | not DE  |
| EVM0000893 | LG15 | 60S acidic ribosomal protein | not DE | not DE | not DE   | not DE  |
| EVM0023922 | LG15 | 60S ribosomal protein L21-2- | not DE | not DE | not DE   | not DE  |
| EVM0020947 | LG15 | ABC transporter B family mem | not DE | not DE | not DE   | not DE  |
| EVM0000231 | LG15 | ADP-ribosylation factor GTPa | not DE | not DE | not DE   | not DE  |
| EVM0010874 | LG15 | AP3-complex subunit beta-A-l | not DE | not DE | not DE   | not DE  |
| EVM0001545 | LG15 | BTB/POZ domain-containing pr | not DE | not DE | not DE   | not DE  |
| EVM0015671 | LG15 | DEAD-box ATP-dependent RNA h | not DE | not DE | not DE   | not DE  |
| EVM0009744 | LG15 | DEAD-box ATP-dependent RNA h | not DE | not DE | not DE   | not DE  |
| EVM0013426 | LG15 | DNA gyrase subunit A, chloro | not DE | not DE | not DE   | not DE  |
| EVM0019338 | LG15 | DNA replication complex GINS | not DE | not DE | not DE   | not DE  |
| EVM0007977 | LG15 | DNA replication complex GINS | not DE | not DE | not DE   | not DE  |
| EVM0022459 | LG15 | DNA replication licensing fa | not DE | not DE | not DE   | not DE  |
| EVM0016911 | LG15 | DNA-directed RNA polymerase  | not DE | not DE | not DE   | not DE  |
| EVM0020492 | LG15 | DNL-type zinc finger protein | not DE | not DE | not DE   | not DE  |
| EVM0017820 | LG15 | E3 ubiquitin-protein ligase  | not DE | not DE | not DE   | not DE  |
| EVM0006216 | LG15 | E3 ubiquitin-protein ligase  | not DE | not DE | -1.16621 | #####   |
| EVM0007252 | LG15 | ENTH domain-containing prote | not DE | not DE | not DE   | not DE  |
| EVM0023991 | LG15 | ENTH domain-containing prote | not DE | not DE | not DE   | not DE  |
| EVM0024383 | LG15 | ETHYLENE INSENSITIVE 3-like  | not DE | not DE | not DE   | not DE  |
| EVM0002451 | LG15 | Fructose-bisphosphate aldola | not DE | not DE | not DE   | not DE  |
| EVM0000339 | LG15 | GDSL esterase/lipase At5g036 | not DE | not DE | not DE   | not DE  |
| EVM0023729 | LG15 | GDSL esterase/lipase CPRD49- | not DE | not DE | not DE   | not DE  |
| EVM0024393 | LG15 | L-type lectin-domain contain | not DE | not DE | not DE   | not DE  |

|            |      |                               |          |          |          |        |
|------------|------|-------------------------------|----------|----------|----------|--------|
| EVM0015258 | LG15 | LOW QUALITY PROTEIN: anthran  | not DE   | not DE   | not DE   | not DE |
| EVM0002769 | LG15 | LOW QUALITY PROTEIN: transke  | not DE   | not DE   | not DE   | not DE |
| EVM0020491 | LG15 | LRR receptor-like serine/thr  | not DE   | not DE   | not DE   | not DE |
| EVM0009072 | LG15 | LRR receptor-like serine/thr  | -2.48576 | 4.39E-08 | -2.46166 | #####  |
| EVM0005340 | LG15 | NADH dehydrogenase            | not DE   | not DE   | not DE   | not DE |
| EVM0013733 | LG15 | OTU domain-containing protei  | not DE   | not DE   | not DE   | not DE |
| EVM0013800 | LG15 | PHD finger protein ALFIN-LIK  | not DE   | not DE   | not DE   | not DE |
| EVM0013298 | LG15 | RING-H2 finger protein ATL51  | not DE   | not DE   | not DE   | not DE |
| EVM0017799 | LG15 | RING-H2 finger protein ATL51  | not DE   | not DE   | not DE   | not DE |
| EVM0019561 | LG15 | RNA-binding protein Nova-1 i  | 1.134179 | 0.017562 | not DE   | not DE |
| EVM0009931 | LG15 | SET and MYND domain-containi  | not DE   | not DE   | not DE   | not DE |
| EVM0022381 | LG15 | SUN domain-containing protei  | not DE   | not DE   | not DE   | not DE |
| EVM0018192 | LG15 | TMV resistance protein N-lik  | not DE   | not DE   | not DE   | not DE |
| EVM0000601 | LG15 | TMV resistance protein N-lik  | not DE   | not DE   | not DE   | not DE |
| EVM0010302 | LG15 | TMV resistance protein N-lik  | not DE   | not DE   | not DE   | not DE |
| EVM0014984 | LG15 | TMV resistance protein N-lik  | not DE   | not DE   | not DE   | not DE |
| EVM0019330 | LG15 | TMV resistance protein N-lik  | not DE   | not DE   | not DE   | not DE |
| EVM0010142 | LG15 | UDP-glycosyltransferase 76F1  | not DE   | not DE   | not DE   | not DE |
| EVM0012195 | LG15 | UDP-glycosyltransferase 76F1  | not DE   | not DE   | not DE   | not DE |
| EVM0015641 | LG15 | UDP-glycosyltransferase 85A1  | not DE   | not DE   | not DE   | not DE |
| EVM0019447 | LG15 | WD repeat-containing protei   | not DE   | not DE   | not DE   | not DE |
| EVM0003777 | LG15 | WUSCHEL-related homeobox 5-l  | not DE   | not DE   | not DE   | not DE |
| EVM0000760 | LG15 | abietadienol/abietadienal ox  | not DE   | not DE   | not DE   | not DE |
| EVM0013850 | LG15 | actin-97-like                 | not DE   | not DE   | not DE   | not DE |
| EVM0016718 | LG15 | actin-97-like                 | not DE   | not DE   | not DE   | not DE |
| EVM0014021 | LG15 | acyl-CoA-binding domain-cont  | not DE   | not DE   | not DE   | not DE |
| EVM0009311 | LG15 | alpha-galactosidase-like      | not DE   | not DE   | not DE   | not DE |
| EVM0019106 | LG15 | alpha-galactosidase-like      | not DE   | not DE   | not DE   | not DE |
| EVM0016214 | LG15 | anaphase-promoting complex s  | not DE   | not DE   | not DE   | not DE |
| EVM0019294 | LG15 | ankyrin repeat-containing pr  | not DE   | not DE   | not DE   | not DE |
| EVM0001846 | LG15 | armadillo repeat-containing   | not DE   | not DE   | not DE   | not DE |
| EVM0004802 | LG15 | beta-galactosidase-like       | not DE   | not DE   | not DE   | not DE |
| EVM0003768 | LG15 | calcium-dependent protein kin | not DE   | not DE   | not DE   | not DE |
| EVM0019100 | LG15 | calcium-dependent protein kin | not DE   | not DE   | not DE   | not DE |
| EVM0010959 | LG15 | calmodulin-interacting prote  | not DE   | not DE   | -1.0215  | #####  |
| EVM0014946 | LG15 | calnexin homolog              | not DE   | not DE   | not DE   | not DE |
| EVM0009457 | LG15 | cation/H(+) antiporter 15-li  | not DE   | not DE   | not DE   | not DE |
| EVM0005395 | LG15 | charged multivesicular body   | not DE   | not DE   | not DE   | not DE |
| EVM0007356 | LG15 | cucumber peeling cupredoxin-  | not DE   | not DE   | not DE   | not DE |
| EVM0024237 | LG15 | cucumber peeling cupredoxin-  | not DE   | not DE   | not DE   | not DE |
| EVM0013843 | LG15 | cucumisin-like                | not DE   | not DE   | not DE   | not DE |
| EVM0018069 | LG15 | cucumisin-like                | not DE   | not DE   | not DE   | not DE |
| EVM0024034 | LG15 | cucumisin-like                | not DE   | not DE   | not DE   | not DE |
| EVM0003084 | LG15 | cyclin-dependent protein kin  | not DE   | not DE   | not DE   | not DE |
| EVM0006039 | LG15 | cysteine proteinase inhibitor | not DE   | not DE   | not DE   | not DE |
| EVM0007446 | LG15 | cytochrome P450 716B1-like    | not DE   | not DE   | not DE   | not DE |
| EVM0015047 | LG15 | cytochrome P450 77A3-like     | -1.82781 | 0.02435  | not DE   | not DE |
| EVM0014932 | LG15 | cytochrome P450 78A9-like is  | not DE   | not DE   | not DE   | not DE |
| EVM0006029 | LG15 | cytosolic endo-beta-N-acetyl  | not DE   | not DE   | not DE   | not DE |
| EVM0022458 | LG15 | cytosolic endo-beta-N-acetyl  | not DE   | not DE   | not DE   | not DE |
| EVM0018155 | LG15 | cytosolic sulfotransferase 1  | 3.140871 | 0.037412 | not DE   | not DE |
| EVM0019777 | LG15 | delta-1-pyrroline-5-carboxyl  | 1.445908 | 0.038879 | not DE   | not DE |
| EVM0023252 | LG15 | delta-aminolevulinic acid de  | not DE   | not DE   | not DE   | not DE |
| EVM0023932 | LG15 | delta-aminolevulinic acid de  | not DE   | not DE   | not DE   | not DE |

|            |      |                               |          |          |          |         |
|------------|------|-------------------------------|----------|----------|----------|---------|
| EVM0004196 | LG15 | dnaJ protein homolog isoform  | not DE   | not DE   | not DE   | not DE  |
| EVM0016362 | LG15 | dnaJ protein homolog isoform  | not DE   | not DE   | not DE   | not DE  |
| EVM0004713 | LG15 | early endosome antigen 1-like | not DE   | not DE   | not DE   | not DE  |
| EVM0018841 | LG15 | early endosome antigen 1-like | not DE   | not DE   | not DE   | not DE  |
| EVM0015136 | LG15 | elicitor-responsive protein   | -2.65205 | 0.043162 | not DE   | not DE  |
| EVM0005651 | LG15 | elongator complex protein 1   | not DE   | not DE   | not DE   | not DE  |
| EVM0008101 | LG15 | endoglucanase 12-like         | not DE   | not DE   | not DE   | not DE  |
| EVM0006011 | LG15 | eukaryotic peptide chain rel  | 1.791333 | 7.42E-06 | not DE   | not DE  |
| EVM0010988 | LG15 | exocyst complex component EX  | not DE   | not DE   | not DE   | not DE  |
| EVM0004150 | LG15 | exocyst complex component SE  | not DE   | not DE   | not DE   | not DE  |
| EVM0024368 | LG15 | exocyst complex component SE  | not DE   | not DE   | not DE   | not DE  |
| EVM0018795 | LG15 | ferredoxin-3, chloroplastic   | not DE   | not DE   | not DE   | not DE  |
| EVM0015114 | LG15 | ferritin-3, chloroplastic-li  | not DE   | not DE   | not DE   | not DE  |
| EVM0013375 | LG15 | flowering time control prote  | not DE   | not DE   | not DE   | not DE  |
| EVM0001779 | LG15 | folylpolyglutamate synthase   | 1.111194 | 3.16E-07 | not DE   | not DE  |
| EVM0019774 | LG15 | galactoside 2-alpha-L-fucosy  | not DE   | not DE   | not DE   | not DE  |
| EVM0002906 | LG15 | general transcription factor  | not DE   | not DE   | not DE   | not DE  |
| EVM0008138 | LG15 | germin-like protein subfamil  | not DE   | not DE   | not DE   | not DE  |
| EVM0005403 | LG15 | glucan endo-1,3-beta-glucosi  | not DE   | not DE   | not DE   | not DE  |
| EVM0022613 | LG15 | glucan endo-1,3-beta-glucosi  | not DE   | not DE   | not DE   | not DE  |
| EVM0017462 | LG15 | glucan endo-1,3-beta-glucosi  | not DE   | not DE   | not DE   | not DE  |
| EVM0019972 | LG15 | glutathione S-transferase DH  | not DE   | not DE   | not DE   | not DE  |
| EVM0022963 | LG15 | glutathione S-transferase DH  | not DE   | not DE   | not DE   | not DE  |
| EVM0010146 | LG15 | glutathione S-transferase L2  | not DE   | not DE   | 1.707425 | 0.03556 |
| EVM0006981 | LG15 | glutathione S-transferase UL  | not DE   | not DE   | not DE   | not DE  |
| EVM0009244 | LG15 | glutathione S-transferase UL  | not DE   | not DE   | not DE   | not DE  |
| EVM0015137 | LG15 | glutathione S-transferase UL  | not DE   | not DE   | not DE   | not DE  |
| EVM0003117 | LG15 | glycine--tRNA ligase 1, mito  | not DE   | not DE   | not DE   | not DE  |
| EVM0000299 | LG15 | heat shock 70 kDa protein, m  | not DE   | not DE   | -1.28305 | #####   |
| EVM0016092 | LG15 | heat shock cognate 70 kDa pr  | -4.8578  | 5.04E-07 | -3.76137 | #####   |
| EVM0020276 | LG15 | heat shock cognate 70 kDa pr  | -5.25345 | 0.00409  | not DE   | not DE  |
| EVM0011544 | LG15 | heparan-alpha-glucosaminide   | not DE   | not DE   | not DE   | not DE  |
| EVM0021658 | LG15 | histone-lysine N-methyltrans  | not DE   | not DE   | not DE   | not DE  |
| EVM0008391 | LG15 | hydroxyacyl-thioester dehydr  | not DE   | not DE   | not DE   | not DE  |
| EVM0024320 | LG15 | inactive leucine-rich repeat  | not DE   | not DE   | not DE   | not DE  |
| EVM0021582 | LG15 | indole-3-acetic acid-amido s  | not DE   | not DE   | not DE   | not DE  |
| EVM0004926 | LG15 | inositol-tetrakisphosphate l  | not DE   | not DE   | not DE   | not DE  |
| EVM0013335 | LG15 | leucine-rich repeat receptor  | not DE   | not DE   | not DE   | not DE  |
| EVM0009153 | LG15 | leucoanthocyanidin dioxygena  | not DE   | not DE   | not DE   | not DE  |
| EVM0001952 | LG15 | lysosomal Pro-X carboxypepti  | not DE   | not DE   | not DE   | not DE  |
| EVM0020871 | LG15 | methyltransferase-like prote  | not DE   | not DE   | not DE   | not DE  |
| EVM0017534 | LG15 | mitochondrial acidic protein  | not DE   | not DE   | not DE   | not DE  |
| EVM0020244 | LG15 | mitochondrial acidic protein  | not DE   | not DE   | not DE   | not DE  |
| EVM0022559 | LG15 | mitochondrial import inner m  | not DE   | not DE   | not DE   | not DE  |
| EVM0013755 | LG15 | monocopper oxidase-like prot  | not DE   | not DE   | not DE   | not DE  |
| EVM0004574 | LG15 | non-symbiotic hemoglobin 2    | not DE   | not DE   | not DE   | not DE  |
| EVM0008415 | LG15 | nudix hydrolase 16, mitochon  | not DE   | not DE   | not DE   | not DE  |
| EVM0012838 | LG15 | nudix hydrolase 16, mitochon  | not DE   | not DE   | not DE   | not DE  |
| EVM0010555 | LG15 | pentatricopeptide repeat-con  | 1.288616 | 0.02385  | not DE   | not DE  |
| EVM0003439 | LG15 | pentatricopeptide repeat-con  | not DE   | not DE   | not DE   | not DE  |
| EVM0021749 | LG15 | pentatricopeptide repeat-con  | not DE   | not DE   | not DE   | not DE  |
| EVM0004310 | LG15 | pentatricopeptide repeat-con  | not DE   | not DE   | not DE   | not DE  |
| EVM0023530 | LG15 | pentatricopeptide repeat-con  | not DE   | not DE   | not DE   | not DE  |
| EVM0007161 | LG15 | pentatricopeptide repeat-con  | not DE   | not DE   | not DE   | not DE  |

|            |      |                                |          |          |          |         |
|------------|------|--------------------------------|----------|----------|----------|---------|
| EVM0005281 | LG15 | peptidyl-prolyl cis-trans isom | not DE   | not DE   | not DE   | not DE  |
| EVM0018509 | LG15 | peroxidase P7-like             | not DE   | not DE   | not DE   | not DE  |
| EVM0005572 | LG15 | phosphatidylinositol-3-phosph  | not DE   | not DE   | not DE   | not DE  |
| EVM0009915 | LG15 | phosphatidylinositol-glycan    | not DE   | not DE   | not DE   | not DE  |
| EVM0009661 | LG15 | phosphoglucan phosphatase DS   | 1.140972 | 0.011148 | 1.061336 | 0.00295 |
| EVM0015506 | LG15 | potassium transporter 5        | not DE   | not DE   | not DE   | not DE  |
| EVM0015328 | LG15 | probable BOI-related E3 ubiqu  | not DE   | not DE   | not DE   | not DE  |
| EVM0022850 | LG15 | probable DNA-directed RNA po   | 1.722455 | 3.75E-05 | not DE   | not DE  |
| EVM0014064 | LG15 | probable LRR receptor-like s   | not DE   | not DE   | not DE   | not DE  |
| EVM0001685 | LG15 | probable LRR receptor-like s   | not DE   | not DE   | not DE   | not DE  |
| EVM0001781 | LG15 | probable LRR receptor-like s   | not DE   | not DE   | not DE   | not DE  |
| EVM0017788 | LG15 | probable LRR receptor-like s   | not DE   | not DE   | not DE   | not DE  |
| EVM0010332 | LG15 | probable RNA-binding protein   | 1.039272 | 0.000145 | not DE   | not DE  |
| EVM0007274 | LG15 | probable beta-1,4-xylosyltra   | not DE   | not DE   | not DE   | not DE  |
| EVM0003641 | LG15 | probable methyltransferase P   | not DE   | not DE   | not DE   | not DE  |
| EVM0016671 | LG15 | probable methyltransferase P   | not DE   | not DE   | not DE   | not DE  |
| EVM0011549 | LG15 | probable pectinesterase/pect   | not DE   | not DE   | not DE   | not DE  |
| EVM0012429 | LG15 | probable phosphoribosylformy   | not DE   | not DE   | not DE   | not DE  |
| EVM0007774 | LG15 | probable pre-mRNA-splicing f   | not DE   | not DE   | not DE   | not DE  |
| EVM0004818 | LG15 | probable protein arginine N-   | not DE   | not DE   | -1.1011  | 0.01725 |
| EVM0023682 | LG15 | probable protein phosphatase   | not DE   | not DE   | not DE   | not DE  |
| EVM0018215 | LG15 | probable sodium/metabolite c   | not DE   | not DE   | not DE   | not DE  |
| EVM0008812 | LG15 | probable ubiquitin-conjugati   | not DE   | not DE   | not DE   | not DE  |
| EVM0002643 | LG15 | probable xyloglucan endotran   | not DE   | not DE   | not DE   | not DE  |
| EVM0005021 | LG15 | protein AATF-like              | not DE   | not DE   | not DE   | not DE  |
| EVM0003885 | LG15 | protein FIZZY-RELATED 3-like   | not DE   | not DE   | not DE   | not DE  |
| EVM0017500 | LG15 | protein GUCD1-like isoform X   | not DE   | not DE   | not DE   | not DE  |
| EVM0023143 | LG15 | protein LATERAL ROOT PRIMORD   | not DE   | not DE   | not DE   | not DE  |
| EVM0001563 | LG15 | protein LURP-one-related 14    | not DE   | not DE   | not DE   | not DE  |
| EVM0006547 | LG15 | protein MID1-COMPLEMENTING A   | not DE   | not DE   | not DE   | not DE  |
| EVM0000157 | LG15 | protein MIZU-KUSSEI 1-like     | not DE   | not DE   | not DE   | not DE  |
| EVM0017409 | LG15 | protein ROOT PRIMORDIUM DEFE   | not DE   | not DE   | not DE   | not DE  |
| EVM0019503 | LG15 | protein ROOT PRIMORDIUM DEFE   | not DE   | not DE   | not DE   | not DE  |
| EVM0005059 | LG15 | protein SRG1-like              | not DE   | not DE   | not DE   | not DE  |
| EVM0003856 | LG15 | protein YLS7-like              | not DE   | not DE   | not DE   | not DE  |
| EVM0021685 | LG15 | protein YLS7-like              | not DE   | not DE   | not DE   | not DE  |
| EVM0009828 | LG15 | protein kinase APK1A, chloro   | not DE   | not DE   | not DE   | not DE  |
| EVM0008295 | LG15 | protein phosphatase 2C 37-li   | 2.967241 | 3.12E-07 | not DE   | not DE  |
| EVM0012249 | LG15 | pullulanase 1, chloroplastid   | not DE   | not DE   | not DE   | not DE  |
| EVM0019233 | LG15 | pumilio homolog 1-like         | not DE   | not DE   | not DE   | not DE  |
| EVM0000365 | LG15 | putative DEAD-box ATP-depend   | not DE   | not DE   | not DE   | not DE  |
| EVM0007194 | LG15 | putative disease resistance    | not DE   | not DE   | not DE   | not DE  |
| EVM0005832 | LG15 | putative leucine-rich repeat   | not DE   | not DE   | not DE   | not DE  |
| EVM0004214 | LG15 | putative receptor-like prote   | not DE   | not DE   | not DE   | not DE  |
| EVM0013553 | LG15 | putative receptor-like prote   | not DE   | not DE   | not DE   | not DE  |
| EVM0017537 | LG15 | putative receptor-like prote   | not DE   | not DE   | not DE   | not DE  |
| EVM0001027 | LG15 | quinone oxidoreductase-like    | not DE   | not DE   | not DE   | not DE  |
| EVM0001298 | LG15 | rRNA biogenesis protein rrp3   | not DE   | not DE   | not DE   | not DE  |
| EVM0015352 | LG15 | rab9 effector protein with k   | not DE   | not DE   | not DE   | not DE  |
| EVM0000332 | LG15 | ras-related protein RABF1      | not DE   | not DE   | not DE   | not DE  |
| EVM0010001 | LG15 | reactive oxygen species modu   | not DE   | not DE   | not DE   | not DE  |
| EVM0005366 | LG15 | regulator of nonsense transcr  | not DE   | not DE   | not DE   | not DE  |
| EVM0012555 | LG15 | retinoblastoma-related prote   | not DE   | not DE   | not DE   | not DE  |
| EVM0024085 | LG15 | retinoblastoma-related prote   | not DE   | not DE   | not DE   | not DE  |

|            |      |                               |          |          |          |         |
|------------|------|-------------------------------|----------|----------|----------|---------|
| EVM0016859 | LG15 | ribosome biogenesis protein   | not DE   | not DE   | not DE   | not DE  |
| EVM0011688 | LG15 | shugoshin-1-like isoform X2   | not DE   | not DE   | not DE   | not DE  |
| EVM0014212 | LG15 | sister chromatid cohesion 1   | not DE   | not DE   | not DE   | not DE  |
| EVM0019568 | LG15 | sister chromatid cohesion 1   | not DE   | not DE   | not DE   | not DE  |
| EVM0011193 | LG15 | subtilisin-like protease-like | not DE   | not DE   | 2.460369 | 0.00389 |
| EVM0022733 | LG15 | syntaxin-31-like isoform X2   | not DE   | not DE   | not DE   | not DE  |
| EVM0024166 | LG15 | tRNA (guanine(26)-N(2))-dime  | not DE   | not DE   | not DE   | not DE  |
| EVM0017833 | LG15 | telomere repeat-binding prot  | not DE   | not DE   | not DE   | not DE  |
| EVM0004242 | LG15 | transcription factor GAMYB-l  | not DE   | not DE   | not DE   | not DE  |
| EVM0019300 | LG15 | transcription factor GTE1-li  | not DE   | not DE   | not DE   | not DE  |
| EVM0010931 | LG15 | transcription repressor OFP1  | not DE   | not DE   | not DE   | not DE  |
| EVM0013769 | LG15 | transcription repressor OFP1  | not DE   | not DE   | not DE   | not DE  |
| EVM0018733 | LG15 | transcriptional activator DE  | not DE   | not DE   | not DE   | not DE  |
| EVM0010481 | LG15 | trichohyalin-like             | not DE   | not DE   | not DE   | not DE  |
| EVM0019375 | LG15 | triosephosphate isomerase, c  | not DE   | not DE   | not DE   | not DE  |
| EVM0010710 | LG15 | two-component response regul  | not DE   | not DE   | not DE   | not DE  |
| EVM0008569 | LG15 | type I inositol 1,4,5-trisph  | not DE   | not DE   | not DE   | not DE  |
| EVM0011727 | LG15 | tyrosine--tRNA ligase, cytop  | not DE   | not DE   | not DE   | not DE  |
| EVM0016973 | LG15 | ubiquinol-cytochrome c reduc  | not DE   | not DE   | not DE   | not DE  |
| EVM0014590 | LG15 | ubiquitin carboxyl-terminal   | not DE   | not DE   | not DE   | not DE  |
| EVM0008839 | LG15 | ubiquitin-like protein 5      | not DE   | not DE   | 1.631582 | #####   |
| EVM0003821 | LG15 | uncharacterized RING finger   | 2.323761 | 0.000248 | not DE   | not DE  |
| EVM0013549 | LG15 | uncharacterized protein At3g  | not DE   | not DE   | not DE   | not DE  |
| EVM0021000 | LG15 | uncharacterized protein At3g  | not DE   | not DE   | not DE   | not DE  |
| EVM0012820 | LG15 | uncharacterized protein At4g  | not DE   | not DE   | not DE   | not DE  |
| EVM0003616 | LG15 | uncharacterized protein At5g  | not DE   | not DE   | not DE   | not DE  |
| EVM0010531 | LG15 | uncharacterized protein DDB_  | not DE   | not DE   | not DE   | not DE  |
| EVM0003597 | LG15 | uncharacterized protein LOC1  | not DE   | not DE   | not DE   | not DE  |
| EVM0019690 | LG15 | uncharacterized protein LOC1  | 1.269917 | 0.02504  | not DE   | not DE  |
| EVM0001852 | LG15 | uncharacterized protein LOC1  | not DE   | not DE   | -1.28697 | #####   |
| EVM0017926 | LG15 | uncharacterized protein LOC1  | not DE   | not DE   | not DE   | not DE  |
| EVM0008052 | LG15 | uncharacterized protein LOC1  | not DE   | not DE   | not DE   | not DE  |
| EVM0011487 | LG15 | uncharacterized protein LOC1  | not DE   | not DE   | not DE   | not DE  |
| EVM0014823 | LG15 | uncharacterized protein LOC1  | not DE   | not DE   | not DE   | not DE  |
| EVM0021820 | LG15 | uncharacterized protein LOC1  | not DE   | not DE   | not DE   | not DE  |
| EVM0019278 | LG15 | uncharacterized protein LOC1  | not DE   | not DE   | not DE   | not DE  |
| EVM0007986 | LG15 | uncharacterized protein LOC1  | not DE   | not DE   | not DE   | not DE  |
| EVM0008547 | LG15 | uncharacterized protein LOC1  | not DE   | not DE   | not DE   | not DE  |
| EVM0001070 | LG15 | uncharacterized protein LOC1  | not DE   | not DE   | not DE   | not DE  |
| EVM0004647 | LG15 | uncharacterized protein LOC1  | not DE   | not DE   | not DE   | not DE  |
| EVM0012410 | LG15 | uncharacterized protein LOC1  | not DE   | not DE   | not DE   | not DE  |
| EVM0021472 | LG15 | uncharacterized protein LOC1  | not DE   | not DE   | not DE   | not DE  |
| EVM0017871 | LG15 | uncharacterized protein LOC1  | not DE   | not DE   | not DE   | not DE  |
| EVM0022814 | LG15 | uncharacterized protein LOC1  | not DE   | not DE   | not DE   | not DE  |
| EVM0020121 | LG15 | uncharacterized protein LOC1  | not DE   | not DE   | 1.238246 | 0.00432 |
| EVM0023671 | LG15 | uncharacterized protein LOC1  | not DE   | not DE   | not DE   | not DE  |
| EVM0011385 | LG15 | uncharacterized protein LOC1  | not DE   | not DE   | not DE   | not DE  |
| EVM0019358 | LG15 | uncharacterized protein LOC1  | not DE   | not DE   | not DE   | not DE  |
| EVM0014446 | LG15 | uncharacterized protein LOC1  | not DE   | not DE   | not DE   | not DE  |
| EVM0015203 | LG15 | uncharacterized protein LOC1  | not DE   | not DE   | not DE   | not DE  |
| EVM0021056 | LG15 | uncharacterized protein LOC1  | not DE   | not DE   | not DE   | not DE  |
| EVM0016851 | LG15 | uncharacterized protein LOC1  | not DE   | not DE   | not DE   | not DE  |
| EVM0005456 | LG15 | uncharacterized protein LOC1  | not DE   | not DE   | not DE   | not DE  |
| EVM0004816 | LG15 | uncharacterized protein LOC1  | not DE   | not DE   | not DE   | not DE  |



|            |      |                               |          |          |          |         |
|------------|------|-------------------------------|----------|----------|----------|---------|
| EVM0019451 | LG15 | uncharacterized protein LOC1  | not DE   | not DE   | -1.26794 | #####   |
| EVM0001836 | LG15 | uncharacterized protein LOC1  | not DE   | not DE   | not DE   | not DE  |
| EVM0010786 | LG15 | uncharacterized protein LOC1  | not DE   | not DE   | not DE   | not DE  |
| EVM0017444 | LG15 | uncharacterized protein LOC1  | not DE   | not DE   | not DE   | not DE  |
| EVM0007170 | LG15 | uncharacterized protein LOC1  | not DE   | not DE   | not DE   | not DE  |
| EVM0014604 | LG15 | uncharacterized protein LOC1  | not DE   | not DE   | not DE   | not DE  |
| EVM0016727 | LG15 | uncharacterized protein LOC1  | not DE   | not DE   | not DE   | not DE  |
| EVM0002849 | LG15 | uncharacterized protein LOC1  | not DE   | not DE   | not DE   | not DE  |
| EVM0017922 | LG15 | uncharacterized protein LOC1  | not DE   | not DE   | not DE   | not DE  |
| EVM0006618 | LG15 | uncharacterized protein LOC1  | not DE   | not DE   | not DE   | not DE  |
| EVM0005466 | LG15 | uncharacterized protein LOC1  | not DE   | not DE   | not DE   | not DE  |
| EVM0013037 | LG15 | uncharacterized protein LOC1  | not DE   | not DE   | not DE   | not DE  |
| EVM0004867 | LG15 | uncharacterized protein LOC1  | not DE   | not DE   | not DE   | not DE  |
| EVM0012347 | LG15 | uncharacterized protein LOC1  | not DE   | not DE   | not DE   | not DE  |
| EVM0012947 | LG15 | uncharacterized protein LOC1  | not DE   | not DE   | not DE   | not DE  |
| EVM0015582 | LG15 | uncharacterized protein LOC1  | not DE   | not DE   | not DE   | not DE  |
| EVM0015924 | LG15 | uncharacterized protein LOC1  | not DE   | not DE   | not DE   | not DE  |
| EVM0015316 | LG15 | uncharacterized protein LOC1  | not DE   | not DE   | not DE   | not DE  |
| EVM0017380 | LG15 | uncharacterized protein LOC1  | not DE   | not DE   | not DE   | not DE  |
| EVM0012348 | LG15 | uncharacterized protein LOC1  | not DE   | not DE   | not DE   | not DE  |
| EVM0004525 | LG15 | uncharacterized protein LOC1  | not DE   | not DE   | not DE   | not DE  |
| EVM0007342 | LG15 | uncharacterized protein LOC1  | not DE   | not DE   | not DE   | not DE  |
| EVM0006617 | LG15 | uncharacterized protein LOC1  | not DE   | not DE   | not DE   | not DE  |
| EVM0009986 | LG15 | uncharacterized protein LOC1  | not DE   | not DE   | not DE   | not DE  |
| EVM0016379 | LG15 | uncharacterized protein LOC1  | not DE   | not DE   | not DE   | not DE  |
| EVM0019517 | LG15 | uncharacterized protein LOC1  | not DE   | not DE   | not DE   | not DE  |
| EVM0018645 | LG15 | uncharacterized protein LOC1  | not DE   | not DE   | not DE   | not DE  |
| EVM0000603 | LG15 | uncharacterized protein LOC1  | not DE   | not DE   | not DE   | not DE  |
| EVM0010838 | LG15 | uncharacterized protein LOC1  | not DE   | not DE   | not DE   | not DE  |
| EVM0008028 | LG15 | uncharacterized protein LOC1  | not DE   | not DE   | not DE   | not DE  |
| EVM0019906 | LG15 | uncharacterized protein LOC1  | 1.581602 | 0.018838 | not DE   | not DE  |
| EVM0004284 | LG15 | uncharacterized protein LOC1  | not DE   | not DE   | not DE   | not DE  |
| EVM0015730 | LG15 | uncharacterized transmembran  | not DE   | not DE   | -1.00224 | 0.00084 |
| EVM0010191 | LG15 | vesicle transport protein SE  | not DE   | not DE   | not DE   | not DE  |
| EVM0008901 | LG15 | wall-associated receptor kin  | not DE   | not DE   | not DE   | not DE  |
| EVM0013636 | LG15 | wound-induced protein 1-like  | -1.50673 | 0.012416 | not DE   | not DE  |
| EVM0000477 | LG15 | zinc finger CCCH domain-cont  | not DE   | not DE   | not DE   | not DE  |
| EVM0016689 | LG15 | 2-oxoglutarate and Fe(II)-dep | not DE   | not DE   | not DE   | not DE  |
| EVM0000739 | LG15 | 30S ribosomal protein S8, put | not DE   | not DE   | not DE   | not DE  |
| EVM0004176 | LG15 | 60S ribosomal protein L35aA   | not DE   | not DE   | not DE   | not DE  |
| EVM0003073 | LG15 | ABC2                          | not DE   | not DE   | not DE   | not DE  |
| EVM0011911 | LG15 | ADP-ribosylation factor famil | not DE   | not DE   | not DE   | not DE  |
| EVM0005077 | LG15 | AP2/ERF domain-containing tra | not DE   | not DE   | not DE   | not DE  |
| EVM0008304 | LG15 | AP2/ERF transcription factor  | 3.034295 | 0.001567 | not DE   | not DE  |
| EVM0013737 | LG15 | ARM repeat superfamily protei | not DE   | not DE   | not DE   | not DE  |
| EVM0005536 | LG15 | ARM repeat superfamily protei | not DE   | not DE   | not DE   | not DE  |
| EVM0002095 | LG15 | ASH1-related protein 2, putat | not DE   | not DE   | not DE   | not DE  |
| EVM0024351 | LG15 | AT-hook protein of GA feedbac | not DE   | not DE   | not DE   | not DE  |
| EVM0008294 | LG15 | Aspartic proteinase nepenthes | not DE   | not DE   | not DE   | not DE  |
| EVM0004789 | LG15 | Beta-galactosidase            | not DE   | not DE   | not DE   | not DE  |
| EVM0003893 | LG15 | Biotin/lipoyl attachment doma | not DE   | not DE   | not DE   | not DE  |
| EVM0003959 | LG15 | C2H2 and C2HC zinc fingers su | not DE   | not DE   | not DE   | not DE  |
| EVM0013719 | LG15 | C2H2 and C2HC zinc fingers su | not DE   | not DE   | not DE   | not DE  |
| EVM0016876 | LG15 | C2H2 and C2HC zinc fingers su | not DE   | not DE   | not DE   | not DE  |

|            |      |                                 |          |          |          |         |
|------------|------|---------------------------------|----------|----------|----------|---------|
| EVM0009912 | LG15 | C2H2-type zinc finger family    | not DE   | not DE   | not DE   | not DE  |
| EVM0001848 | LG15 | C2H2-type zinc finger protein   | not DE   | not DE   | not DE   | not DE  |
| EVM0013186 | LG15 | CI small heat shock protein 2   | -3.05811 | 0.000226 | -1.55546 | #####   |
| EVM0013101 | LG15 | Calcium-dependent ARF-type GTP  | not DE   | not DE   | not DE   | not DE  |
| EVM0014708 | LG15 | Calcium-dependent ARF-type GTP  | not DE   | not DE   | not DE   | not DE  |
| EVM0012943 | LG15 | Chlorophyll a-b binding protein | not DE   | not DE   | 1.881593 | 0.00085 |
| EVM0017206 | LG15 | Crooked neck-like protein 1     | not DE   | not DE   | not DE   | not DE  |
| EVM0002529 | LG15 | Cytoplasmic tRNA 2-thiolation   | not DE   | not DE   | not DE   | not DE  |
| EVM0023258 | LG15 | DNA-directed RNA polymerase I   | not DE   | not DE   | not DE   | not DE  |
| EVM0009635 | LG15 | DNA-directed RNA polymerase I   | 2.178174 | 0.000421 | not DE   | not DE  |
| EVM0016050 | LG15 | DNA-directed RNA polymerase II  | not DE   | not DE   | not DE   | not DE  |
| EVM0002275 | LG15 | DNA/RNA polymerases superfamily | not DE   | not DE   | not DE   | not DE  |
| EVM0007478 | LG15 | Double Clp-N motif-containing   | not DE   | not DE   | not DE   | not DE  |
| EVM0017139 | LG15 | Elongation factor 1-alpha       | not DE   | not DE   | not DE   | not DE  |
| EVM0022507 | LG15 | Elongation factor 1-alpha       | not DE   | not DE   | not DE   | not DE  |
| EVM0017802 | LG15 | Emb:CAB81597.1                  | not DE   | not DE   | not DE   | not DE  |
| EVM0002344 | LG15 | Expansin A4, ALPHA 1.6, EXPA4   | not DE   | not DE   | not DE   | not DE  |
| EVM0019496 | LG15 | F-box family protein, putative  | not DE   | not DE   | not DE   | not DE  |
| EVM0022660 | LG15 | FAD-dependent oxidoreductase    | not DE   | not DE   | not DE   | not DE  |
| EVM0000297 | LG15 | Gb:AAB97010.1 isoform 2         | not DE   | not DE   | not DE   | not DE  |
| EVM0012075 | LG15 | Integrase-type DNA-binding sub  | not DE   | not DE   | not DE   | not DE  |
| EVM0014043 | LG15 | Kinase superfamily protein      | not DE   | not DE   | not DE   | not DE  |
| EVM0002373 | LG15 | LOB domain-containing protein   | not DE   | not DE   | not DE   | not DE  |
| EVM0020656 | LG15 | LYR family of Fe/S cluster bin  | not DE   | not DE   | not DE   | not DE  |
| EVM0006219 | LG15 | Leucine-rich repeat protein k   | not DE   | not DE   | not DE   | not DE  |
| EVM0005056 | LG15 | Lysine histidine transporter    | not DE   | not DE   | not DE   | not DE  |
| EVM0017345 | LG15 | MATE efflux family protein is   | not DE   | not DE   | not DE   | not DE  |
| EVM0002248 | LG15 | Major facilitator superfamily   | not DE   | not DE   | not DE   | not DE  |
| EVM0023770 | LG15 | Major facilitator superfamily   | not DE   | not DE   | 2.684163 | #####   |
| EVM0006749 | LG15 | Metal tolerance 5               | not DE   | not DE   | not DE   | not DE  |
| EVM0018473 | LG15 | Metal tolerance 5               | not DE   | not DE   | not DE   | not DE  |
| EVM0002224 | LG15 | Methyl esterase 17              | not DE   | not DE   | not DE   | not DE  |
| EVM0009485 | LG15 | NAD(P)-binding Rossmann-fold    | not DE   | not DE   | 1.664226 | 0.00432 |
| EVM0003169 | LG15 | NADPH:QUINONE OXIDOREDUCTASE    | not DE   | not DE   | not DE   | not DE  |
| EVM0023754 | LG15 | NADPH:quinone oxidoreductase    | not DE   | not DE   | not DE   | not DE  |
| EVM0010949 | LG15 | Nascent polypeptide-associate   | not DE   | not DE   | not DE   | not DE  |
| EVM0016643 | LG15 | Nascent polypeptide-associate   | not DE   | not DE   | not DE   | not DE  |
| EVM0014951 | LG15 | Nine-cis-epoxycarotenoid diox   | not DE   | not DE   | not DE   | not DE  |
| EVM0023983 | LG15 | Nucleic acid binding protein,   | not DE   | not DE   | not DE   | not DE  |
| EVM0002926 | LG15 | Nucleotide-diphospho-sugar tr   | not DE   | not DE   | not DE   | not DE  |
| EVM0014501 | LG15 | Nudix hydrolase                 | not DE   | not DE   | not DE   | not DE  |
| EVM0006413 | LG15 | Nudix hydrolase 13, mitochond   | not DE   | not DE   | not DE   | not DE  |
| EVM0022319 | LG15 | PATATIN-like protein 6, IIB     | 1.172754 | 0.004541 | not DE   | not DE  |
| EVM0010018 | LG15 | PLAC8 family protein            | not DE   | not DE   | not DE   | not DE  |
| EVM0020149 | LG15 | Pentatricopeptide repeat-cont   | not DE   | not DE   | not DE   | not DE  |
| EVM0018313 | LG15 | Peptide-N4-(N-acetyl-beta-glu   | not DE   | not DE   | not DE   | not DE  |
| EVM0020734 | LG15 | Peptide-N4-(N-acetyl-beta-glu   | not DE   | not DE   | not DE   | not DE  |
| EVM0006539 | LG15 | Protein FAM96B, putative        | not DE   | not DE   | not DE   | not DE  |
| EVM0015016 | LG15 | Protein FAM96B, putative        | not DE   | not DE   | not DE   | not DE  |
| EVM0022778 | LG15 | Pseudouridine synthase family   | not DE   | not DE   | not DE   | not DE  |
| EVM0010403 | LG15 | Pyruvate kinase family protei   | not DE   | not DE   | not DE   | not DE  |
| EVM0015301 | LG15 | RING-H2 finger protein ATL2G    | not DE   | not DE   | not DE   | not DE  |
| EVM0024189 | LG15 | RING-H2 finger protein ATL2G    | not DE   | not DE   | not DE   | not DE  |
| EVM0019519 | LG15 | RNI-like superfamily protein    | not DE   | not DE   | not DE   | not DE  |

|            |      |                                |          |          |          |         |
|------------|------|--------------------------------|----------|----------|----------|---------|
| EVM0013174 | LG15 | RecName: Full=Beta-amyrin syn  | not DE   | not DE   | not DE   | not DE  |
| EVM0003475 | LG15 | Receptor-like protein kinase   | not DE   | not DE   | not DE   | not DE  |
| EVM0023405 | LG15 | Receptor-like protein kinase   | not DE   | not DE   | not DE   | not DE  |
| EVM0009939 | LG15 | Regulator of chromosome conde  | -3.4961  | 1.13E-10 | -1.06896 | 0.03103 |
| EVM0010434 | LG15 | Respiratory burst oxidase D    | not DE   | not DE   | not DE   | not DE  |
| EVM0006597 | LG15 | S-adenosyl-L-methionine-depen  | not DE   | not DE   | not DE   | not DE  |
| EVM0015954 | LG15 | S-adenosyl-L-methionine-depen  | not DE   | not DE   | not DE   | not DE  |
| EVM0018814 | LG15 | SEC14 cytosolic factor family  | not DE   | not DE   | not DE   | not DE  |
| EVM0008006 | LG15 | Sec14p-like phosphatidylinosi  | not DE   | not DE   | not DE   | not DE  |
| EVM0017817 | LG15 | Sedoheptulose-bisphosphatase   | not DE   | not DE   | not DE   | not DE  |
| EVM0008579 | LG15 | Serine/arginine-rich splicing  | not DE   | not DE   | not DE   | not DE  |
| EVM0013601 | LG15 | Serine/arginine-rich splicing  | not DE   | not DE   | not DE   | not DE  |
| EVM0021957 | LG15 | Single-stranded nucleic acid   | not DE   | not DE   | not DE   | not DE  |
| EVM0001858 | LG15 | Small basic intrinsic protein  | not DE   | not DE   | 2.084113 | #####   |
| EVM0004580 | LG15 | Small basic intrinsic protein  | not DE   | not DE   | not DE   | not DE  |
| EVM0005269 | LG15 | Sulfotransferase 2A            | not DE   | not DE   | not DE   | not DE  |
| EVM0018365 | LG15 | Synaptic glycoprotein SC2, pu  | not DE   | not DE   | not DE   | not DE  |
| EVM0020565 | LG15 | Synaptic glycoprotein SC2, pu  | not DE   | not DE   | not DE   | not DE  |
| EVM0010031 | LG15 | TPA: TPA_exp: caffeine syntha  | not DE   | not DE   | not DE   | not DE  |
| EVM0013260 | LG15 | Tetratricopeptide repeat-like  | 1.666976 | 0.002165 | not DE   | not DE  |
| EVM0019207 | LG15 | Transcription elongation fact  | not DE   | not DE   | not DE   | not DE  |
| EVM0019602 | LG15 | Transcription factor bHLH61 i  | not DE   | not DE   | 2.76043  | 0.00089 |
| EVM0011924 | LG15 | Transducin/WD40 repeat-like s  | not DE   | not DE   | not DE   | not DE  |
| EVM0013314 | LG15 | Transferrin-like protein isof  | not DE   | not DE   | not DE   | not DE  |
| EVM0020971 | LG15 | Translocase of the outer mito  | not DE   | not DE   | not DE   | not DE  |
| EVM0002634 | LG15 | Transmembrane amino acid tran  | 3.697176 | 0.006023 | not DE   | not DE  |
| EVM0010418 | LG15 | Two-component response regula  | not DE   | not DE   | not DE   | not DE  |
| EVM0012845 | LG15 | Two-component response regula  | not DE   | not DE   | not DE   | not DE  |
| EVM0003652 | LG15 | Type one serine/threonine prom | not DE   | not DE   | not DE   | not DE  |
| EVM0023451 | LG15 | Tyrosyl-tRNA synthetase, clas  | not DE   | not DE   | not DE   | not DE  |
| EVM0017753 | LG15 | U2 small nuclear ribonucleopr  | not DE   | not DE   | not DE   | not DE  |
| EVM0006921 | LG15 | Ubiquitin-conjugating enzyme   | not DE   | not DE   | not DE   | not DE  |
| EVM0015029 | LG15 | Ubiquitin-conjugating enzyme   | not DE   | not DE   | not DE   | not DE  |
| EVM0018290 | LG15 | Uncharacterized protein TCM_C  | not DE   | not DE   | not DE   | not DE  |
| EVM0019457 | LG15 | Uncharacterized protein TCM_C  | not DE   | not DE   | 1.682706 | 0.0186  |
| EVM0024143 | LG15 | Uncharacterized protein TCM_C  | -1.61796 | 0.000241 | not DE   | not DE  |
| EVM0007222 | LG15 | Uncharacterized protein TCM_C  | not DE   | not DE   | not DE   | not DE  |
| EVM0004480 | LG15 | Uncharacterized protein TCM_C  | not DE   | not DE   | not DE   | not DE  |
| EVM0007098 | LG15 | Uncharacterized protein TCM_C  | not DE   | not DE   | not DE   | not DE  |
| EVM0006303 | LG15 | Uncharacterized protein isof   | not DE   | not DE   | not DE   | not DE  |
| EVM0010172 | LG15 | Uncharacterized protein isof   | not DE   | not DE   | not DE   | not DE  |
| EVM0002838 | LG15 | Vacuolar protein sorting prot  | not DE   | not DE   | not DE   | not DE  |
| EVM0004535 | LG15 | WD repeat domain phosphoinosi  | not DE   | not DE   | not DE   | not DE  |
| EVM0014861 | LG15 | WPP domain-associated protein  | not DE   | not DE   | not DE   | not DE  |
| EVM0002771 | LG15 | WRKY transcription factor 70   | not DE   | not DE   | not DE   | not DE  |
| EVM0001104 | LG15 | XH/XS domain-containing prote  | not DE   | not DE   | not DE   | not DE  |
| EVM0022112 | LG15 | Zeamatin precursor, putative   | not DE   | not DE   | not DE   | not DE  |
| EVM0000363 | LG15 | Zinc finger family protein is  | not DE   | not DE   | not DE   | not DE  |
| EVM0020938 | LG15 | Zinc induced facilitator-like  | 1.679737 | 0.030451 | not DE   | not DE  |
| EVM0007471 | LG15 | acyl carrier protein, putativ  | not DE   | not DE   | not DE   | not DE  |
| EVM0011140 | LG15 | adenosine kinase, putative     | not DE   | not DE   | not DE   | not DE  |
| EVM0001431 | LG15 | arsenical pump-driving atpase  | not DE   | not DE   | not DE   | not DE  |
| EVM0007475 | LG15 | basic leucine zipper protein   | not DE   | not DE   | not DE   | not DE  |
| EVM0014793 | LG15 | caffeine synthase, partial     | not DE   | not DE   | not DE   | not DE  |

|            |      |                                |          |          |        |        |
|------------|------|--------------------------------|----------|----------|--------|--------|
| EVM0015596 | LG15 | catalytic, putative            | not DE   | not DE   | not DE | not DE |
| EVM0003154 | LG15 | ccaat-binding transcription f  | not DE   | not DE   | not DE | not DE |
| EVM0010827 | LG15 | chalcone isomerase             | not DE   | not DE   | not DE | not DE |
| EVM0018483 | LG15 | chalcone synthase              | not DE   | not DE   | not DE | not DE |
| EVM0012649 | LG15 | chlorophyll(ide) b reductase   | not DE   | not DE   | not DE | not DE |
| EVM0010517 | LG15 | chloroplast ribulose-1,5-bisph | -1.93407 | 1.33E-06 | not DE | not DE |
| EVM0000954 | LG15 | conserved hypothetical protein | not DE   | not DE   | not DE | not DE |
| EVM0001226 | LG15 | conserved hypothetical protein | not DE   | not DE   | not DE | not DE |
| EVM0003004 | LG15 | conserved hypothetical protein | not DE   | not DE   | not DE | not DE |
| EVM0003492 | LG15 | conserved hypothetical protein | not DE   | not DE   | not DE | not DE |
| EVM0013124 | LG15 | conserved hypothetical protein | not DE   | not DE   | not DE | not DE |
| EVM0014456 | LG15 | conserved hypothetical protein | not DE   | not DE   | not DE | not DE |
| EVM0016756 | LG15 | conserved hypothetical protein | not DE   | not DE   | not DE | not DE |
| EVM0017315 | LG15 | conserved hypothetical protein | not DE   | not DE   | not DE | not DE |
| EVM0018137 | LG15 | conserved hypothetical protein | not DE   | not DE   | not DE | not DE |
| EVM0019861 | LG15 | conserved hypothetical protein | not DE   | not DE   | not DE | not DE |
| EVM0024216 | LG15 | conserved hypothetical protein | not DE   | not DE   | not DE | not DE |
| EVM0006891 | LG15 | cystathionine beta-lyase, par  | not DE   | not DE   | not DE | not DE |
| EVM0021577 | LG15 | cytochrome p450 51 family pro  | not DE   | not DE   | not DE | not DE |
| EVM0008403 | LG15 | early flowering 6              | not DE   | not DE   | not DE | not DE |
| EVM0005732 | LG15 | esterase/lipase/thioesterase   | not DE   | not DE   | not DE | not DE |
| EVM0018239 | LG15 | expansin 3                     | not DE   | not DE   | not DE | not DE |
| EVM0012162 | LG15 | fasciclin-like arabinogalacta  | not DE   | not DE   | not DE | not DE |
| EVM0020151 | LG15 | fatty acid desaturase          | not DE   | not DE   | not DE | not DE |
| EVM0009374 | LG15 | flowering locus D-a            | not DE   | not DE   | not DE | not DE |
| EVM0004307 | LG15 | gag-pol polyprotein            | not DE   | not DE   | not DE | not DE |
| EVM0015963 | LG15 | gag/pol protein                | not DE   | not DE   | not DE | not DE |
| EVM0004146 | LG15 | glutamate receptor 2 plant, p  | not DE   | not DE   | not DE | not DE |
| EVM0012355 | LG15 | glutamate receptor 2 plant, p  | not DE   | not DE   | not DE | not DE |
| EVM0013310 | LG15 | glycine-rich RNA-binding fami  | 1.441817 | 0.000743 | not DE | not DE |
| EVM0002322 | LG15 | heat shock protein 70          | not DE   | not DE   | not DE | not DE |
| EVM0018355 | LG15 | heat shock protein 70          | -3.49536 | 0.008257 | not DE | not DE |
| EVM0004159 | LG15 | hypothetical protein AMTR_s05  | not DE   | not DE   | not DE | not DE |
| EVM0011058 | LG15 | hypothetical protein CARUB_vl  | not DE   | not DE   | not DE | not DE |
| EVM0010600 | LG15 | hypothetical protein CICLE_vl  | not DE   | not DE   | not DE | not DE |
| EVM0012064 | LG15 | hypothetical protein CICLE_vl  | not DE   | not DE   | not DE | not DE |
| EVM0002394 | LG15 | hypothetical protein CICLE_vl  | not DE   | not DE   | not DE | not DE |
| EVM0023704 | LG15 | hypothetical protein CICLE_vl  | not DE   | not DE   | not DE | not DE |
| EVM0015437 | LG15 | hypothetical protein CICLE_vl  | not DE   | not DE   | not DE | not DE |
| EVM0023477 | LG15 | hypothetical protein CICLE_vl  | not DE   | not DE   | not DE | not DE |
| EVM0001663 | LG15 | hypothetical protein CICLE_vl  | not DE   | not DE   | not DE | not DE |
| EVM0004951 | LG15 | hypothetical protein CICLE_vl  | not DE   | not DE   | not DE | not DE |
| EVM0001768 | LG15 | hypothetical protein CICLE_vl  | not DE   | not DE   | not DE | not DE |
| EVM0004045 | LG15 | hypothetical protein CICLE_vl  | not DE   | not DE   | not DE | not DE |
| EVM0005504 | LG15 | hypothetical protein CICLE_vl  | not DE   | not DE   | not DE | not DE |
| EVM0006264 | LG15 | hypothetical protein CICLE_vl  | not DE   | not DE   | not DE | not DE |
| EVM0014315 | LG15 | hypothetical protein CICLE_vl  | not DE   | not DE   | not DE | not DE |
| EVM0019809 | LG15 | hypothetical protein CICLE_vl  | not DE   | not DE   | not DE | not DE |
| EVM0021152 | LG15 | hypothetical protein CICLE_vl  | not DE   | not DE   | not DE | not DE |
| EVM0002566 | LG15 | hypothetical protein CICLE_vl  | not DE   | not DE   | not DE | not DE |
| EVM0009964 | LG15 | hypothetical protein CICLE_vl  | not DE   | not DE   | not DE | not DE |
| EVM0014290 | LG15 | hypothetical protein CICLE_vl  | not DE   | not DE   | not DE | not DE |
| EVM0006437 | LG15 | hypothetical protein CICLE_vl  | not DE   | not DE   | not DE | not DE |
| EVM0009582 | LG15 | hypothetical protein CICLE_vl  | not DE   | not DE   | not DE | not DE |

|            |      |                               |          |          |          |         |
|------------|------|-------------------------------|----------|----------|----------|---------|
| EVM0010795 | LG15 | hypothetical protein CICLE_v1 | not DE   | not DE   | not DE   | not DE  |
| EVM0019594 | LG15 | hypothetical protein CICLE_v1 | not DE   | not DE   | not DE   | not DE  |
| EVM0021471 | LG15 | hypothetical protein CICLE_v1 | not DE   | not DE   | not DE   | not DE  |
| EVM0017676 | LG15 | hypothetical protein CICLE_v1 | not DE   | not DE   | not DE   | not DE  |
| EVM0001999 | LG15 | hypothetical protein CICLE_v1 | not DE   | not DE   | not DE   | not DE  |
| EVM0006411 | LG15 | hypothetical protein CICLE_v1 | not DE   | not DE   | not DE   | not DE  |
| EVM0019097 | LG15 | hypothetical protein CICLE_v1 | not DE   | not DE   | not DE   | not DE  |
| EVM0019486 | LG15 | hypothetical protein CICLE_v1 | not DE   | not DE   | not DE   | not DE  |
| EVM0007022 | LG15 | hypothetical protein CICLE_v1 | not DE   | not DE   | not DE   | not DE  |
| EVM0022792 | LG15 | hypothetical protein CICLE_v1 | not DE   | not DE   | not DE   | not DE  |
| EVM0018301 | LG15 | hypothetical protein CICLE_v1 | not DE   | not DE   | 1.394291 | 0.00289 |
| EVM0012875 | LG15 | hypothetical protein CICLE_v1 | not DE   | not DE   | not DE   | not DE  |
| EVM0021361 | LG15 | hypothetical protein CICLE_v1 | not DE   | not DE   | not DE   | not DE  |
| EVM0011431 | LG15 | hypothetical protein CICLE_v1 | -1.25246 | 0.014896 | not DE   | not DE  |
| EVM0016935 | LG15 | hypothetical protein CICLE_v1 | not DE   | not DE   | not DE   | not DE  |
| EVM0000734 | LG15 | hypothetical protein CICLE_v1 | -1.54064 | 1.85E-06 | not DE   | not DE  |
| EVM0014286 | LG15 | hypothetical protein CICLE_v1 | not DE   | not DE   | not DE   | not DE  |
| EVM0002005 | LG15 | hypothetical protein CICLE_v1 | not DE   | not DE   | not DE   | not DE  |
| EVM0002052 | LG15 | hypothetical protein CICLE_v1 | not DE   | not DE   | not DE   | not DE  |
| EVM0018467 | LG15 | hypothetical protein CICLE_v1 | not DE   | not DE   | not DE   | not DE  |
| EVM0008503 | LG15 | hypothetical protein CICLE_v1 | not DE   | not DE   | not DE   | not DE  |
| EVM0005427 | LG15 | hypothetical protein CICLE_v1 | not DE   | not DE   | not DE   | not DE  |
| EVM0019364 | LG15 | hypothetical protein CICLE_v1 | not DE   | not DE   | not DE   | not DE  |
| EVM0022489 | LG15 | hypothetical protein CICLE_v1 | not DE   | not DE   | not DE   | not DE  |
| EVM0014267 | LG15 | hypothetical protein CICLE_v1 | not DE   | not DE   | not DE   | not DE  |
| EVM0020927 | LG15 | hypothetical protein CICLE_v1 | not DE   | not DE   | not DE   | not DE  |
| EVM0018519 | LG15 | hypothetical protein CICLE_v1 | not DE   | not DE   | not DE   | not DE  |
| EVM0016153 | LG15 | hypothetical protein CICLE_v1 | not DE   | not DE   | not DE   | not DE  |
| EVM0005204 | LG15 | hypothetical protein CICLE_v1 | not DE   | not DE   | not DE   | not DE  |
| EVM0015903 | LG15 | hypothetical protein CICLE_v1 | not DE   | not DE   | not DE   | not DE  |
| EVM0016260 | LG15 | hypothetical protein CICLE_v1 | not DE   | not DE   | not DE   | not DE  |
| EVM0016705 | LG15 | hypothetical protein CICLE_v1 | not DE   | not DE   | not DE   | not DE  |
| EVM0003773 | LG15 | hypothetical protein CICLE_v1 | not DE   | not DE   | not DE   | not DE  |
| EVM0013706 | LG15 | hypothetical protein CICLE_v1 | not DE   | not DE   | not DE   | not DE  |
| EVM0008042 | LG15 | hypothetical protein CICLE_v1 | not DE   | not DE   | -2.81107 | 0.03951 |
| EVM0008668 | LG15 | hypothetical protein CICLE_v1 | not DE   | not DE   | not DE   | not DE  |
| EVM0008624 | LG15 | hypothetical protein CICLE_v1 | not DE   | not DE   | not DE   | not DE  |
| EVM0017467 | LG15 | hypothetical protein CICLE_v1 | not DE   | not DE   | not DE   | not DE  |
| EVM0013121 | LG15 | hypothetical protein CICLE_v1 | not DE   | not DE   | not DE   | not DE  |
| EVM0000030 | LG15 | hypothetical protein CICLE_v1 | not DE   | not DE   | not DE   | not DE  |
| EVM0001034 | LG15 | hypothetical protein CICLE_v1 | not DE   | not DE   | not DE   | not DE  |
| EVM0011966 | LG15 | hypothetical protein CICLE_v1 | not DE   | not DE   | not DE   | not DE  |
| EVM0002847 | LG15 | hypothetical protein CICLE_v1 | not DE   | not DE   | not DE   | not DE  |
| EVM0024374 | LG15 | hypothetical protein CICLE_v1 | not DE   | not DE   | not DE   | not DE  |
| EVM0021574 | LG15 | hypothetical protein CICLE_v1 | not DE   | not DE   | not DE   | not DE  |
| EVM0009214 | LG15 | hypothetical protein CICLE_v1 | not DE   | not DE   | not DE   | not DE  |
| EVM0021680 | LG15 | hypothetical protein CICLE_v1 | not DE   | not DE   | not DE   | not DE  |
| EVM0023792 | LG15 | hypothetical protein CICLE_v1 | not DE   | not DE   | not DE   | not DE  |
| EVM0003014 | LG15 | hypothetical protein CICLE_v1 | not DE   | not DE   | not DE   | not DE  |
| EVM0011848 | LG15 | hypothetical protein CICLE_v1 | not DE   | not DE   | not DE   | not DE  |
| EVM0005706 | LG15 | hypothetical protein CICLE_v1 | not DE   | not DE   | not DE   | not DE  |
| EVM0017878 | LG15 | hypothetical protein CICLE_v1 | not DE   | not DE   | not DE   | not DE  |
| EVM0000937 | LG15 | hypothetical protein CICLE_v1 | not DE   | not DE   | not DE   | not DE  |
| EVM0015930 | LG15 | hypothetical protein CICLE_v1 | not DE   | not DE   | not DE   | not DE  |

|            |      |                               |          |          |          |         |
|------------|------|-------------------------------|----------|----------|----------|---------|
| EVM0021404 | LG15 | hypothetical protein CICLE_v1 | not DE   | not DE   | not DE   | not DE  |
| EVM0019711 | LG15 | hypothetical protein CICLE_v1 | not DE   | not DE   | not DE   | not DE  |
| EVM0020123 | LG15 | hypothetical protein CICLE_v1 | not DE   | not DE   | not DE   | not DE  |
| EVM0000447 | LG15 | hypothetical protein CICLE_v1 | not DE   | not DE   | not DE   | not DE  |
| EVM0002977 | LG15 | hypothetical protein CICLE_v1 | 3.465891 | 7.45E-10 | not DE   | not DE  |
| EVM0022868 | LG15 | hypothetical protein CICLE_v1 | 1.302391 | 0.009392 | 1.38313  | 0.01357 |
| EVM0016473 | LG15 | hypothetical protein CICLE_v1 | not DE   | not DE   | not DE   | not DE  |
| EVM0013353 | LG15 | hypothetical protein CICLE_v1 | not DE   | not DE   | not DE   | not DE  |
| EVM0019838 | LG15 | hypothetical protein CICLE_v1 | not DE   | not DE   | not DE   | not DE  |
| EVM0023300 | LG15 | hypothetical protein CICLE_v1 | not DE   | not DE   | not DE   | not DE  |
| EVM0002586 | LG15 | hypothetical protein CICLE_v1 | not DE   | not DE   | not DE   | not DE  |
| EVM0020764 | LG15 | hypothetical protein CICLE_v1 | not DE   | not DE   | not DE   | not DE  |
| EVM0023990 | LG15 | hypothetical protein CICLE_v1 | not DE   | not DE   | not DE   | not DE  |
| EVM0000743 | LG15 | hypothetical protein CICLE_v1 | not DE   | not DE   | not DE   | not DE  |
| EVM0008576 | LG15 | hypothetical protein CICLE_v1 | not DE   | not DE   | not DE   | not DE  |
| EVM0019438 | LG15 | hypothetical protein CICLE_v1 | not DE   | not DE   | not DE   | not DE  |
| EVM0017636 | LG15 | hypothetical protein CICLE_v1 | not DE   | not DE   | not DE   | not DE  |
| EVM0014386 | LG15 | hypothetical protein CICLE_v1 | not DE   | not DE   | not DE   | not DE  |
| EVM0003558 | LG15 | hypothetical protein CICLE_v1 | not DE   | not DE   | not DE   | not DE  |
| EVM0010360 | LG15 | hypothetical protein CICLE_v1 | not DE   | not DE   | not DE   | not DE  |
| EVM0017314 | LG15 | hypothetical protein CICLE_v1 | not DE   | not DE   | not DE   | not DE  |
| EVM0021123 | LG15 | hypothetical protein CICLE_v1 | not DE   | not DE   | not DE   | not DE  |
| EVM0006978 | LG15 | hypothetical protein CICLE_v1 | not DE   | not DE   | not DE   | not DE  |
| EVM0007306 | LG15 | hypothetical protein CICLE_v1 | not DE   | not DE   | not DE   | not DE  |
| EVM0020341 | LG15 | hypothetical protein CICLE_v1 | not DE   | not DE   | not DE   | not DE  |
| EVM0009387 | LG15 | hypothetical protein CICLE_v1 | not DE   | not DE   | not DE   | not DE  |
| EVM0024170 | LG15 | hypothetical protein CICLE_v1 | not DE   | not DE   | 1.162093 | 0.03337 |
| EVM0009202 | LG15 | hypothetical protein CICLE_v1 | not DE   | not DE   | not DE   | not DE  |
| EVM0007851 | LG15 | hypothetical protein CICLE_v1 | not DE   | not DE   | not DE   | not DE  |
| EVM0003013 | LG15 | hypothetical protein CICLE_v1 | not DE   | not DE   | not DE   | not DE  |
| EVM0024173 | LG15 | hypothetical protein CICLE_v1 | not DE   | not DE   | not DE   | not DE  |
| EVM0002317 | LG15 | hypothetical protein CICLE_v1 | not DE   | not DE   | not DE   | not DE  |
| EVM0003438 | LG15 | hypothetical protein CICLE_v1 | 1.195668 | 0.005408 | not DE   | not DE  |
| EVM0018409 | LG15 | hypothetical protein CICLE_v1 | not DE   | not DE   | not DE   | not DE  |
| EVM0023938 | LG15 | hypothetical protein CICLE_v1 | not DE   | not DE   | not DE   | not DE  |
| EVM0016381 | LG15 | hypothetical protein CICLE_v1 | not DE   | not DE   | not DE   | not DE  |
| EVM0014834 | LG15 | hypothetical protein CICLE_v1 | not DE   | not DE   | not DE   | not DE  |
| EVM0007505 | LG15 | hypothetical protein CICLE_v1 | not DE   | not DE   | not DE   | not DE  |
| EVM0000534 | LG15 | hypothetical protein CICLE_v1 | not DE   | not DE   | not DE   | not DE  |
| EVM0005007 | LG15 | hypothetical protein CICLE_v1 | not DE   | not DE   | not DE   | not DE  |
| EVM0016003 | LG15 | hypothetical protein CICLE_v1 | not DE   | not DE   | not DE   | not DE  |
| EVM0022235 | LG15 | hypothetical protein CICLE_v1 | not DE   | not DE   | not DE   | not DE  |
| EVM0014872 | LG15 | hypothetical protein CICLE_v1 | not DE   | not DE   | not DE   | not DE  |
| EVM0001622 | LG15 | hypothetical protein CICLE_v1 | not DE   | not DE   | not DE   | not DE  |
| EVM0020437 | LG15 | hypothetical protein CICLE_v1 | not DE   | not DE   | -1.01728 | 0.00015 |
| EVM0008085 | LG15 | hypothetical protein CICLE_v1 | not DE   | not DE   | not DE   | not DE  |
| EVM0002833 | LG15 | hypothetical protein CICLE_v1 | not DE   | not DE   | not DE   | not DE  |
| EVM0018428 | LG15 | hypothetical protein CICLE_v1 | not DE   | not DE   | -1.27051 | 0.00264 |
| EVM0023877 | LG15 | hypothetical protein CICLE_v1 | not DE   | not DE   | not DE   | not DE  |
| EVM0012767 | LG15 | hypothetical protein CICLE_v1 | -1.34605 | 0.001167 | not DE   | not DE  |
| EVM0006357 | LG15 | hypothetical protein CICLE_v1 | not DE   | not DE   | not DE   | not DE  |
| EVM0019813 | LG15 | hypothetical protein CICLE_v1 | not DE   | not DE   | not DE   | not DE  |
| EVM0015246 | LG15 | hypothetical protein CICLE_v1 | not DE   | not DE   | not DE   | not DE  |
| EVM0011332 | LG15 | hypothetical protein CICLE_v1 | not DE   | not DE   | not DE   | not DE  |

|            |      |                               |          |          |          |         |
|------------|------|-------------------------------|----------|----------|----------|---------|
| EVM0001807 | LG15 | hypothetical protein CICLE_v1 | not DE   | not DE   | not DE   | not DE  |
| EVM0010366 | LG15 | hypothetical protein CICLE_v1 | -1.12045 | 0.02219  | -1.16354 | 0.00798 |
| EVM0006852 | LG15 | hypothetical protein CICLE_v1 | not DE   | not DE   | not DE   | not DE  |
| EVM0022760 | LG15 | hypothetical protein CICLE_v1 | not DE   | not DE   | not DE   | not DE  |
| EVM0005994 | LG15 | hypothetical protein CICLE_v1 | not DE   | not DE   | not DE   | not DE  |
| EVM0000695 | LG15 | hypothetical protein CICLE_v1 | not DE   | not DE   | not DE   | not DE  |
| EVM0016766 | LG15 | hypothetical protein CICLE_v1 | not DE   | not DE   | not DE   | not DE  |
| EVM0008072 | LG15 | hypothetical protein CICLE_v1 | not DE   | not DE   | not DE   | not DE  |
| EVM0006863 | LG15 | hypothetical protein CICLE_v1 | not DE   | not DE   | not DE   | not DE  |
| EVM0012397 | LG15 | hypothetical protein CICLE_v1 | not DE   | not DE   | not DE   | not DE  |
| EVM0013061 | LG15 | hypothetical protein CICLE_v1 | not DE   | not DE   | not DE   | not DE  |
| EVM0000975 | LG15 | hypothetical protein CICLE_v1 | not DE   | not DE   | not DE   | not DE  |
| EVM0014841 | LG15 | hypothetical protein CICLE_v1 | not DE   | not DE   | not DE   | not DE  |
| EVM0014027 | LG15 | hypothetical protein CICLE_v1 | not DE   | not DE   | not DE   | not DE  |
| EVM0009592 | LG15 | hypothetical protein CICLE_v1 | not DE   | not DE   | not DE   | not DE  |
| EVM0001631 | LG15 | hypothetical protein CICLE_v1 | not DE   | not DE   | not DE   | not DE  |
| EVM0021662 | LG15 | hypothetical protein CICLE_v1 | not DE   | not DE   | not DE   | not DE  |
| EVM0009968 | LG15 | hypothetical protein CICLE_v1 | not DE   | not DE   | not DE   | not DE  |
| EVM0006742 | LG15 | hypothetical protein CICLE_v1 | not DE   | not DE   | not DE   | not DE  |
| EVM0009133 | LG15 | hypothetical protein CICLE_v1 | not DE   | not DE   | not DE   | not DE  |
| EVM0002278 | LG15 | hypothetical protein CICLE_v1 | not DE   | not DE   | not DE   | not DE  |
| EVM0018274 | LG15 | hypothetical protein CICLE_v1 | not DE   | not DE   | not DE   | not DE  |
| EVM0008456 | LG15 | hypothetical protein CICLE_v1 | not DE   | not DE   | not DE   | not DE  |
| EVM0020347 | LG15 | hypothetical protein CICLE_v1 | not DE   | not DE   | not DE   | not DE  |
| EVM0023703 | LG15 | hypothetical protein CICLE_v1 | not DE   | not DE   | not DE   | not DE  |
| EVM0012627 | LG15 | hypothetical protein CICLE_v1 | not DE   | not DE   | not DE   | not DE  |
| EVM0024101 | LG15 | hypothetical protein CICLE_v1 | not DE   | not DE   | not DE   | not DE  |
| EVM0024505 | LG15 | hypothetical protein CICLE_v1 | not DE   | not DE   | not DE   | not DE  |
| EVM0004237 | LG15 | hypothetical protein CICLE_v1 | not DE   | not DE   | not DE   | not DE  |
| EVM0016076 | LG15 | hypothetical protein CICLE_v1 | not DE   | not DE   | -1.0117  | 0.04676 |
| EVM0018714 | LG15 | hypothetical protein CICLE_v1 | not DE   | not DE   | not DE   | not DE  |
| EVM0018104 | LG15 | hypothetical protein CICLE_v1 | not DE   | not DE   | not DE   | not DE  |
| EVM0024295 | LG15 | hypothetical protein CICLE_v1 | not DE   | not DE   | not DE   | not DE  |
| EVM0020427 | LG15 | hypothetical protein CICLE_v1 | not DE   | not DE   | not DE   | not DE  |
| EVM0006134 | LG15 | hypothetical protein CICLE_v1 | not DE   | not DE   | not DE   | not DE  |
| EVM0006559 | LG15 | hypothetical protein CICLE_v1 | not DE   | not DE   | not DE   | not DE  |
| EVM0016439 | LG15 | hypothetical protein CICLE_v1 | 2.055555 | 0.002983 | not DE   | not DE  |
| EVM0006453 | LG15 | hypothetical protein CICLE_v1 | not DE   | not DE   | not DE   | not DE  |
| EVM0017450 | LG15 | hypothetical protein CICLE_v1 | not DE   | not DE   | not DE   | not DE  |
| EVM0007364 | LG15 | hypothetical protein CICLE_v1 | not DE   | not DE   | not DE   | not DE  |
| EVM0017459 | LG15 | hypothetical protein CICLE_v1 | not DE   | not DE   | not DE   | not DE  |
| EVM0007178 | LG15 | hypothetical protein CICLE_v1 | not DE   | not DE   | not DE   | not DE  |
| EVM0020762 | LG15 | hypothetical protein CICLE_v1 | not DE   | not DE   | not DE   | not DE  |
| EVM0017072 | LG15 | hypothetical protein CICLE_v1 | not DE   | not DE   | not DE   | not DE  |
| EVM0015165 | LG15 | hypothetical protein CICLE_v1 | not DE   | not DE   | not DE   | not DE  |
| EVM0011689 | LG15 | hypothetical protein CICLE_v1 | not DE   | not DE   | not DE   | not DE  |
| EVM0016553 | LG15 | hypothetical protein CICLE_v1 | not DE   | not DE   | not DE   | not DE  |
| EVM0006425 | LG15 | hypothetical protein CICLE_v1 | not DE   | not DE   | not DE   | not DE  |
| EVM0024275 | LG15 | hypothetical protein CICLE_v1 | not DE   | not DE   | not DE   | not DE  |
| EVM0017548 | LG15 | hypothetical protein CICLE_v1 | not DE   | not DE   | not DE   | not DE  |
| EVM0020703 | LG15 | hypothetical protein CICLE_v1 | not DE   | not DE   | not DE   | not DE  |
| EVM0017728 | LG15 | hypothetical protein CICLE_v1 | not DE   | not DE   | not DE   | not DE  |
| EVM0020124 | LG15 | hypothetical protein CICLE_v1 | not DE   | not DE   | not DE   | not DE  |
| EVM0005495 | LG15 | hypothetical protein CICLE_v1 | 1.913344 | 0.025041 | not DE   | not DE  |

|            |      |                               |          |          |          |         |
|------------|------|-------------------------------|----------|----------|----------|---------|
| EVM0011684 | LG15 | hypothetical protein CICLE_v1 | not DE   | not DE   | not DE   | not DE  |
| EVM0010381 | LG15 | hypothetical protein CICLE_v1 | not DE   | not DE   | not DE   | not DE  |
| EVM0017283 | LG15 | hypothetical protein CICLE_v1 | not DE   | not DE   | not DE   | not DE  |
| EVM0017680 | LG15 | hypothetical protein CICLE_v1 | not DE   | not DE   | not DE   | not DE  |
| EVM0019851 | LG15 | hypothetical protein CICLE_v1 | not DE   | not DE   | not DE   | not DE  |
| EVM0018741 | LG15 | hypothetical protein CICLE_v1 | not DE   | not DE   | not DE   | not DE  |
| EVM0008525 | LG15 | hypothetical protein CICLE_v1 | not DE   | not DE   | not DE   | not DE  |
| EVM0014056 | LG15 | hypothetical protein CICLE_v1 | not DE   | not DE   | not DE   | not DE  |
| EVM0006182 | LG15 | hypothetical protein CICLE_v1 | not DE   | not DE   | not DE   | not DE  |
| EVM0013933 | LG15 | hypothetical protein CICLE_v1 | not DE   | not DE   | not DE   | not DE  |
| EVM0001063 | LG15 | hypothetical protein CICLE_v1 | not DE   | not DE   | not DE   | not DE  |
| EVM0008044 | LG15 | hypothetical protein CICLE_v1 | not DE   | not DE   | not DE   | not DE  |
| EVM0000126 | LG15 | hypothetical protein CICLE_v1 | not DE   | not DE   | not DE   | not DE  |
| EVM0003626 | LG15 | hypothetical protein CICLE_v1 | not DE   | not DE   | -2.12614 | #####   |
| EVM0015750 | LG15 | hypothetical protein CICLE_v1 | not DE   | not DE   | not DE   | not DE  |
| EVM0008949 | LG15 | hypothetical protein CICLE_v1 | not DE   | not DE   | not DE   | not DE  |
| EVM0010526 | LG15 | hypothetical protein CICLE_v1 | not DE   | not DE   | not DE   | not DE  |
| EVM0007029 | LG15 | hypothetical protein CICLE_v1 | 3.720104 | 6.26E-05 | not DE   | not DE  |
| EVM0014864 | LG15 | hypothetical protein CICLE_v1 | not DE   | not DE   | not DE   | not DE  |
| EVM0023743 | LG15 | hypothetical protein CICLE_v1 | not DE   | not DE   | not DE   | not DE  |
| EVM0013469 | LG15 | hypothetical protein CICLE_v1 | not DE   | not DE   | not DE   | not DE  |
| EVM0010190 | LG15 | hypothetical protein CICLE_v1 | 1.96482  | 0.006602 | not DE   | not DE  |
| EVM0014786 | LG15 | hypothetical protein CICLE_v1 | not DE   | not DE   | not DE   | not DE  |
| EVM0015489 | LG15 | hypothetical protein CICLE_v1 | not DE   | not DE   | not DE   | not DE  |
| EVM0020720 | LG15 | hypothetical protein CICLE_v1 | not DE   | not DE   | not DE   | not DE  |
| EVM0017506 | LG15 | hypothetical protein CICLE_v1 | not DE   | not DE   | not DE   | not DE  |
| EVM0018485 | LG15 | hypothetical protein CICLE_v1 | not DE   | not DE   | not DE   | not DE  |
| EVM0006381 | LG15 | hypothetical protein CICLE_v1 | not DE   | not DE   | not DE   | not DE  |
| EVM0003079 | LG15 | hypothetical protein CICLE_v1 | not DE   | not DE   | not DE   | not DE  |
| EVM0001717 | LG15 | hypothetical protein CICLE_v1 | not DE   | not DE   | not DE   | not DE  |
| EVM0005550 | LG15 | hypothetical protein CICLE_v1 | -1.82079 | 0.011538 | not DE   | not DE  |
| EVM0013693 | LG15 | hypothetical protein CICLE_v1 | not DE   | not DE   | not DE   | not DE  |
| EVM0005443 | LG15 | hypothetical protein CICLE_v1 | not DE   | not DE   | not DE   | not DE  |
| EVM0004435 | LG15 | hypothetical protein CICLE_v1 | not DE   | not DE   | not DE   | not DE  |
| EVM0023031 | LG15 | hypothetical protein CICLE_v1 | not DE   | not DE   | not DE   | not DE  |
| EVM0019522 | LG15 | hypothetical protein CICLE_v1 | not DE   | not DE   | not DE   | not DE  |
| EVM0014862 | LG15 | hypothetical protein CICLE_v1 | not DE   | not DE   | not DE   | not DE  |
| EVM0006247 | LG15 | hypothetical protein CICLE_v1 | not DE   | not DE   | not DE   | not DE  |
| EVM0007863 | LG15 | hypothetical protein CICLE_v1 | not DE   | not DE   | 1.71591  | 0.01096 |
| EVM0024156 | LG15 | hypothetical protein CICLE_v1 | not DE   | not DE   | not DE   | not DE  |
| EVM0011949 | LG15 | hypothetical protein CICLE_v1 | not DE   | not DE   | not DE   | not DE  |
| EVM0023916 | LG15 | hypothetical protein CICLE_v1 | not DE   | not DE   | not DE   | not DE  |
| EVM0002151 | LG15 | hypothetical protein CICLE_v1 | not DE   | not DE   | not DE   | not DE  |
| EVM0020743 | LG15 | hypothetical protein CICLE_v1 | not DE   | not DE   | not DE   | not DE  |
| EVM0010223 | LG15 | hypothetical protein CICLE_v1 | not DE   | not DE   | not DE   | not DE  |
| EVM0012105 | LG15 | hypothetical protein CICLE_v1 | 2.377184 | 0.023003 | not DE   | not DE  |
| EVM0023067 | LG15 | hypothetical protein CICLE_v1 | not DE   | not DE   | not DE   | not DE  |
| EVM0024230 | LG15 | hypothetical protein CICLE_v1 | not DE   | not DE   | not DE   | not DE  |
| EVM0015039 | LG15 | hypothetical protein CICLE_v1 | not DE   | not DE   | not DE   | not DE  |
| EVM0008729 | LG15 | hypothetical protein CICLE_v1 | not DE   | not DE   | not DE   | not DE  |
| EVM0002049 | LG15 | hypothetical protein CICLE_v1 | not DE   | not DE   | not DE   | not DE  |
| EVM0009076 | LG15 | hypothetical protein CICLE_v1 | not DE   | not DE   | not DE   | not DE  |
| EVM0008934 | LG15 | hypothetical protein CICLE_v1 | not DE   | not DE   | not DE   | not DE  |
| EVM0014490 | LG15 | hypothetical protein CICLE_v1 | not DE   | not DE   | not DE   | not DE  |



|            |      |                               |          |          |          |         |
|------------|------|-------------------------------|----------|----------|----------|---------|
| EVM0015026 | LG15 | hypothetical protein CICLE_v1 | not DE   | not DE   | not DE   | not DE  |
| EVM0010911 | LG15 | hypothetical protein CICLE_v1 | not DE   | not DE   | not DE   | not DE  |
| EVM0019603 | LG15 | hypothetical protein CICLE_v1 | not DE   | not DE   | not DE   | not DE  |
| EVM0011937 | LG15 | hypothetical protein CICLE_v1 | not DE   | not DE   | not DE   | not DE  |
| EVM0019302 | LG15 | hypothetical protein CICLE_v1 | not DE   | not DE   | not DE   | not DE  |
| EVM0015847 | LG15 | hypothetical protein CICLE_v1 | not DE   | not DE   | not DE   | not DE  |
| EVM0004601 | LG15 | hypothetical protein CICLE_v1 | not DE   | not DE   | not DE   | not DE  |
| EVM0012738 | LG15 | hypothetical protein CICLE_v1 | not DE   | not DE   | not DE   | not DE  |
| EVM0008389 | LG15 | hypothetical protein CICLE_v1 | not DE   | not DE   | not DE   | not DE  |
| EVM0014512 | LG15 | hypothetical protein CICLE_v1 | not DE   | not DE   | not DE   | not DE  |
| EVM0009489 | LG15 | hypothetical protein CICLE_v1 | not DE   | not DE   | not DE   | not DE  |
| EVM0016435 | LG15 | hypothetical protein CICLE_v1 | not DE   | not DE   | not DE   | not DE  |
| EVM0019029 | LG15 | hypothetical protein CICLE_v1 | not DE   | not DE   | not DE   | not DE  |
| EVM0010685 | LG15 | hypothetical protein CICLE_v1 | not DE   | not DE   | not DE   | not DE  |
| EVM0002825 | LG15 | hypothetical protein CICLE_v1 | not DE   | not DE   | not DE   | not DE  |
| EVM0003320 | LG15 | hypothetical protein CICLE_v1 | not DE   | not DE   | not DE   | not DE  |
| EVM0005452 | LG15 | hypothetical protein CICLE_v1 | not DE   | not DE   | not DE   | not DE  |
| EVM0013455 | LG15 | hypothetical protein CICLE_v1 | not DE   | not DE   | not DE   | not DE  |
| EVM0009985 | LG15 | hypothetical protein CICLE_v1 | not DE   | not DE   | not DE   | not DE  |
| EVM0014720 | LG15 | hypothetical protein CICLE_v1 | not DE   | not DE   | not DE   | not DE  |
| EVM0017528 | LG15 | hypothetical protein CICLE_v1 | not DE   | not DE   | not DE   | not DE  |
| EVM0005757 | LG15 | hypothetical protein CICLE_v1 | not DE   | not DE   | not DE   | not DE  |
| EVM0005790 | LG15 | hypothetical protein CICLE_v1 | not DE   | not DE   | not DE   | not DE  |
| EVM0024130 | LG15 | hypothetical protein CICLE_v1 | not DE   | not DE   | not DE   | not DE  |
| EVM0018089 | LG15 | hypothetical protein CICLE_v1 | not DE   | not DE   | not DE   | not DE  |
| EVM0020125 | LG15 | hypothetical protein CICLE_v1 | not DE   | not DE   | not DE   | not DE  |
| EVM0008346 | LG15 | hypothetical protein CICLE_v1 | 2.376296 | 0.017973 | not DE   | not DE  |
| EVM0009928 | LG15 | hypothetical protein CICLE_v1 | not DE   | not DE   | not DE   | not DE  |
| EVM0012462 | LG15 | hypothetical protein CICLE_v1 | not DE   | not DE   | 1.076188 | 0.00167 |
| EVM0004122 | LG15 | hypothetical protein CICLE_v1 | not DE   | not DE   | not DE   | not DE  |
| EVM0017435 | LG15 | hypothetical protein CICLE_v1 | not DE   | not DE   | not DE   | not DE  |
| EVM0002469 | LG15 | hypothetical protein CICLE_v1 | not DE   | not DE   | not DE   | not DE  |
| EVM0009951 | LG15 | hypothetical protein CICLE_v1 | not DE   | not DE   | not DE   | not DE  |
| EVM0014450 | LG15 | hypothetical protein CICLE_v1 | not DE   | not DE   | not DE   | not DE  |
| EVM0015658 | LG15 | hypothetical protein CICLE_v1 | not DE   | not DE   | not DE   | not DE  |
| EVM0020044 | LG15 | hypothetical protein CICLE_v1 | not DE   | not DE   | not DE   | not DE  |
| EVM0011878 | LG15 | hypothetical protein CICLE_v1 | not DE   | not DE   | 1.637399 | 0.00935 |
| EVM0010728 | LG15 | hypothetical protein CICLE_v1 | not DE   | not DE   | not DE   | not DE  |
| EVM0012378 | LG15 | hypothetical protein CICLE_v1 | not DE   | not DE   | not DE   | not DE  |
| EVM0004013 | LG15 | hypothetical protein CICLE_v1 | not DE   | not DE   | not DE   | not DE  |
| EVM0007412 | LG15 | hypothetical protein CICLE_v1 | not DE   | not DE   | not DE   | not DE  |
| EVM0018942 | LG15 | hypothetical protein CICLE_v1 | not DE   | not DE   | not DE   | not DE  |
| EVM0013604 | LG15 | hypothetical protein CICLE_v1 | -2.91294 | 0.000117 | not DE   | not DE  |
| EVM0004432 | LG15 | hypothetical protein CICLE_v1 | not DE   | not DE   | not DE   | not DE  |
| EVM0013235 | LG15 | hypothetical protein CICLE_v1 | not DE   | not DE   | not DE   | not DE  |
| EVM0012469 | LG15 | hypothetical protein CICLE_v1 | not DE   | not DE   | not DE   | not DE  |
| EVM0005211 | LG15 | hypothetical protein CICLE_v1 | not DE   | not DE   | not DE   | not DE  |
| EVM0015376 | LG15 | hypothetical protein CICLE_v1 | not DE   | not DE   | not DE   | not DE  |
| EVM0013804 | LG15 | hypothetical protein CICLE_v1 | not DE   | not DE   | not DE   | not DE  |
| EVM0009810 | LG15 | hypothetical protein CICLE_v1 | -1.04427 | 5.81E-05 | not DE   | not DE  |
| EVM0003365 | LG15 | hypothetical protein CICLE_v1 | not DE   | not DE   | not DE   | not DE  |
| EVM0013385 | LG15 | hypothetical protein CICLE_v1 | not DE   | not DE   | not DE   | not DE  |
| EVM0022438 | LG15 | hypothetical protein CICLE_v1 | not DE   | not DE   | not DE   | not DE  |
| EVM0004144 | LG15 | hypothetical protein CICLE_v1 | not DE   | not DE   | not DE   | not DE  |

|            |      |                               |          |          |          |         |
|------------|------|-------------------------------|----------|----------|----------|---------|
| EVM0019610 | LG15 | hypothetical protein CICLE_v1 | not DE   | not DE   | not DE   | not DE  |
| EVM0008618 | LG15 | hypothetical protein CICLE_v1 | not DE   | not DE   | not DE   | not DE  |
| EVM0001650 | LG15 | hypothetical protein CICLE_v1 | not DE   | not DE   | not DE   | not DE  |
| EVM0004281 | LG15 | hypothetical protein CICLE_v1 | not DE   | not DE   | not DE   | not DE  |
| EVM0010813 | LG15 | hypothetical protein CICLE_v1 | not DE   | not DE   | not DE   | not DE  |
| EVM0012763 | LG15 | hypothetical protein CICLE_v1 | not DE   | not DE   | not DE   | not DE  |
| EVM0016799 | LG15 | hypothetical protein CICLE_v1 | not DE   | not DE   | not DE   | not DE  |
| EVM0017674 | LG15 | hypothetical protein CICLE_v1 | not DE   | not DE   | not DE   | not DE  |
| EVM0001166 | LG15 | hypothetical protein CICLE_v1 | not DE   | not DE   | not DE   | not DE  |
| EVM0009347 | LG15 | hypothetical protein CICLE_v1 | not DE   | not DE   | not DE   | not DE  |
| EVM0001757 | LG15 | hypothetical protein CICLE_v1 | not DE   | not DE   | not DE   | not DE  |
| EVM0005557 | LG15 | hypothetical protein CICLE_v1 | not DE   | not DE   | not DE   | not DE  |
| EVM0012185 | LG15 | hypothetical protein CICLE_v1 | not DE   | not DE   | not DE   | not DE  |
| EVM0020779 | LG15 | hypothetical protein CICLE_v1 | not DE   | not DE   | not DE   | not DE  |
| EVM0012130 | LG15 | hypothetical protein CICLE_v1 | not DE   | not DE   | not DE   | not DE  |
| EVM0005449 | LG15 | hypothetical protein CICLE_v1 | not DE   | not DE   | 4.13144  | 0.00373 |
| EVM0011155 | LG15 | hypothetical protein CICLE_v1 | not DE   | not DE   | not DE   | not DE  |
| EVM0008674 | LG15 | hypothetical protein CICLE_v1 | not DE   | not DE   | not DE   | not DE  |
| EVM0024304 | LG15 | hypothetical protein CICLE_v1 | not DE   | not DE   | not DE   | not DE  |
| EVM0005566 | LG15 | hypothetical protein CICLE_v1 | not DE   | not DE   | not DE   | not DE  |
| EVM0017050 | LG15 | hypothetical protein CICLE_v1 | not DE   | not DE   | not DE   | not DE  |
| EVM0016514 | LG15 | hypothetical protein CICLE_v1 | not DE   | not DE   | not DE   | not DE  |
| EVM0007527 | LG15 | hypothetical protein CICLE_v1 | not DE   | not DE   | 1.089716 | #####   |
| EVM0002603 | LG15 | hypothetical protein CICLE_v1 | 3.948631 | 0.00066  | 1.73447  | 0.03711 |
| EVM0019361 | LG15 | hypothetical protein CICLE_v1 | not DE   | not DE   | not DE   | not DE  |
| EVM0021345 | LG15 | hypothetical protein CICLE_v1 | not DE   | not DE   | not DE   | not DE  |
| EVM0012467 | LG15 | hypothetical protein CICLE_v1 | not DE   | not DE   | not DE   | not DE  |
| EVM0004181 | LG15 | hypothetical protein CICLE_v1 | not DE   | not DE   | not DE   | not DE  |
| EVM0012517 | LG15 | hypothetical protein CICLE_v1 | not DE   | not DE   | not DE   | not DE  |
| EVM0007242 | LG15 | hypothetical protein CICLE_v1 | not DE   | not DE   | not DE   | not DE  |
| EVM0012294 | LG15 | hypothetical protein CICLE_v1 | not DE   | not DE   | not DE   | not DE  |
| EVM0017647 | LG15 | hypothetical protein CICLE_v1 | not DE   | not DE   | not DE   | not DE  |
| EVM0015608 | LG15 | hypothetical protein CICLE_v1 | not DE   | not DE   | not DE   | not DE  |
| EVM0000898 | LG15 | hypothetical protein CICLE_v1 | 1.721651 | 0.027153 | not DE   | not DE  |
| EVM0005364 | LG15 | hypothetical protein CICLE_v1 | not DE   | not DE   | not DE   | not DE  |
| EVM0021833 | LG15 | hypothetical protein CICLE_v1 | not DE   | not DE   | not DE   | not DE  |
| EVM0004344 | LG15 | hypothetical protein CICLE_v1 | not DE   | not DE   | not DE   | not DE  |
| EVM0016636 | LG15 | hypothetical protein CICLE_v1 | not DE   | not DE   | not DE   | not DE  |
| EVM0003868 | LG15 | hypothetical protein CICLE_v1 | not DE   | not DE   | not DE   | not DE  |
| EVM0007044 | LG15 | hypothetical protein CICLE_v1 | not DE   | not DE   | not DE   | not DE  |
| EVM0009692 | LG15 | hypothetical protein CICLE_v1 | not DE   | not DE   | not DE   | not DE  |
| EVM0010003 | LG15 | hypothetical protein CICLE_v1 | not DE   | not DE   | not DE   | not DE  |
| EVM0014726 | LG15 | hypothetical protein CICLE_v1 | not DE   | not DE   | not DE   | not DE  |
| EVM0023382 | LG15 | hypothetical protein CICLE_v1 | not DE   | not DE   | not DE   | not DE  |
| EVM0024533 | LG15 | hypothetical protein CICLE_v1 | not DE   | not DE   | not DE   | not DE  |
| EVM0024635 | LG15 | hypothetical protein CICLE_v1 | not DE   | not DE   | not DE   | not DE  |
| EVM0005433 | LG15 | hypothetical protein CICLE_v1 | not DE   | not DE   | not DE   | not DE  |
| EVM0017198 | LG15 | hypothetical protein CICLE_v1 | not DE   | not DE   | not DE   | not DE  |
| EVM0017854 | LG15 | hypothetical protein CICLE_v1 | not DE   | not DE   | not DE   | not DE  |
| EVM0003459 | LG15 | hypothetical protein CICLE_v1 | not DE   | not DE   | not DE   | not DE  |
| EVM0014465 | LG15 | hypothetical protein CICLE_v1 | not DE   | not DE   | not DE   | not DE  |
| EVM0002000 | LG15 | hypothetical protein CICLE_v1 | not DE   | not DE   | not DE   | not DE  |
| EVM0000618 | LG15 | hypothetical protein CICLE_v1 | not DE   | not DE   | not DE   | not DE  |
| EVM0009343 | LG15 | hypothetical protein CICLE_v1 | not DE   | not DE   | not DE   | not DE  |

|            |      |                               |          |          |          |         |
|------------|------|-------------------------------|----------|----------|----------|---------|
| EVM0012256 | LG15 | hypothetical protein CICLE_v1 | not DE   | not DE   | not DE   | not DE  |
| EVM0004982 | LG15 | hypothetical protein CICLE_v1 | not DE   | not DE   | not DE   | not DE  |
| EVM0019462 | LG15 | hypothetical protein CICLE_v1 | not DE   | not DE   | not DE   | not DE  |
| EVM0015289 | LG15 | hypothetical protein CICLE_v1 | not DE   | not DE   | not DE   | not DE  |
| EVM0020953 | LG15 | hypothetical protein CICLE_v1 | not DE   | not DE   | not DE   | not DE  |
| EVM0008431 | LG15 | hypothetical protein CICLE_v1 | not DE   | not DE   | not DE   | not DE  |
| EVM0016475 | LG15 | hypothetical protein CICLE_v1 | not DE   | not DE   | not DE   | not DE  |
| EVM0007972 | LG15 | hypothetical protein CICLE_v1 | not DE   | not DE   | not DE   | not DE  |
| EVM0016207 | LG15 | hypothetical protein CICLE_v1 | not DE   | not DE   | not DE   | not DE  |
| EVM0020512 | LG15 | hypothetical protein CICLE_v1 | not DE   | not DE   | not DE   | not DE  |
| EVM0020924 | LG15 | hypothetical protein CICLE_v1 | not DE   | not DE   | not DE   | not DE  |
| EVM0001382 | LG15 | hypothetical protein CICLE_v1 | not DE   | not DE   | not DE   | not DE  |
| EVM0008908 | LG15 | hypothetical protein CICLE_v1 | 3.702949 | 0.004105 | not DE   | not DE  |
| EVM0011743 | LG15 | hypothetical protein CICLE_v1 | not DE   | not DE   | not DE   | not DE  |
| EVM0002161 | LG15 | hypothetical protein CICLE_v1 | not DE   | not DE   | not DE   | not DE  |
| EVM0014016 | LG15 | hypothetical protein CICLE_v1 | not DE   | not DE   | not DE   | not DE  |
| EVM0018373 | LG15 | hypothetical protein CICLE_v1 | not DE   | not DE   | not DE   | not DE  |
| EVM0022473 | LG15 | hypothetical protein CICLE_v1 | not DE   | not DE   | not DE   | not DE  |
| EVM0017425 | LG15 | hypothetical protein CICLE_v1 | not DE   | not DE   | not DE   | not DE  |
| EVM0010491 | LG15 | hypothetical protein CICLE_v1 | -2.93387 | 0.000152 | not DE   | not DE  |
| EVM0019108 | LG15 | hypothetical protein CICLE_v1 | not DE   | not DE   | not DE   | not DE  |
| EVM0011927 | LG15 | hypothetical protein CICLE_v1 | not DE   | not DE   | not DE   | not DE  |
| EVM0023298 | LG15 | hypothetical protein CICLE_v1 | not DE   | not DE   | not DE   | not DE  |
| EVM0021533 | LG15 | hypothetical protein CICLE_v1 | not DE   | not DE   | not DE   | not DE  |
| EVM0003767 | LG15 | hypothetical protein CICLE_v1 | not DE   | not DE   | not DE   | not DE  |
| EVM0016579 | LG15 | hypothetical protein CISIN_1g | not DE   | not DE   | not DE   | not DE  |
| EVM0007673 | LG15 | hypothetical protein CISIN_1g | not DE   | not DE   | -1.28241 | 0.00507 |
| EVM0007127 | LG15 | hypothetical protein CISIN_1g | not DE   | not DE   | not DE   | not DE  |
| EVM0005349 | LG15 | hypothetical protein CISIN_1g | not DE   | not DE   | not DE   | not DE  |
| EVM0007095 | LG15 | hypothetical protein CISIN_1g | not DE   | not DE   | not DE   | not DE  |
| EVM0006193 | LG15 | hypothetical protein CISIN_1g | not DE   | not DE   | not DE   | not DE  |
| EVM0023852 | LG15 | hypothetical protein CISIN_1g | not DE   | not DE   | not DE   | not DE  |
| EVM0013366 | LG15 | hypothetical protein CISIN_1g | not DE   | not DE   | not DE   | not DE  |
| EVM0004659 | LG15 | hypothetical protein CISIN_1g | not DE   | not DE   | not DE   | not DE  |
| EVM0010107 | LG15 | hypothetical protein CISIN_1g | not DE   | not DE   | not DE   | not DE  |
| EVM0013688 | LG15 | hypothetical protein CISIN_1g | not DE   | not DE   | not DE   | not DE  |
| EVM0011317 | LG15 | hypothetical protein CISIN_1g | not DE   | not DE   | not DE   | not DE  |
| EVM0020595 | LG15 | hypothetical protein CISIN_1g | not DE   | not DE   | not DE   | not DE  |
| EVM0006181 | LG15 | hypothetical protein CISIN_1g | not DE   | not DE   | not DE   | not DE  |
| EVM0017918 | LG15 | hypothetical protein CISIN_1g | not DE   | not DE   | not DE   | not DE  |
| EVM0014055 | LG15 | hypothetical protein CISIN_1g | not DE   | not DE   | not DE   | not DE  |
| EVM0009007 | LG15 | hypothetical protein CISIN_1g | not DE   | not DE   | not DE   | not DE  |
| EVM0009120 | LG15 | hypothetical protein CISIN_1g | not DE   | not DE   | not DE   | not DE  |
| EVM0010863 | LG15 | hypothetical protein CISIN_1g | not DE   | not DE   | not DE   | not DE  |
| EVM0007357 | LG15 | hypothetical protein CISIN_1g | not DE   | not DE   | not DE   | not DE  |
| EVM0011407 | LG15 | hypothetical protein CISIN_1g | not DE   | not DE   | not DE   | not DE  |
| EVM0003670 | LG15 | hypothetical protein CISIN_1g | not DE   | not DE   | not DE   | not DE  |
| EVM0021783 | LG15 | hypothetical protein CISIN_1g | not DE   | not DE   | not DE   | not DE  |
| EVM0012607 | LG15 | hypothetical protein CISIN_1g | not DE   | not DE   | not DE   | not DE  |
| EVM0000605 | LG15 | hypothetical protein CISIN_1g | not DE   | not DE   | not DE   | not DE  |
| EVM0024029 | LG15 | hypothetical protein CISIN_1g | not DE   | not DE   | not DE   | not DE  |
| EVM0017150 | LG15 | hypothetical protein CISIN_1g | 1.03946  | 0.012165 | not DE   | not DE  |
| EVM0023890 | LG15 | hypothetical protein CISIN_1g | not DE   | not DE   | -1.23589 | 0.00504 |
| EVM0021086 | LG15 | hypothetical protein CISIN_1g | not DE   | not DE   | not DE   | not DE  |

|            |      |                               |          |          |          |         |
|------------|------|-------------------------------|----------|----------|----------|---------|
| EVM0021744 | LG15 | hypothetical protein CISIN_1g | not DE   | not DE   | not DE   | not DE  |
| EVM0012774 | LG15 | hypothetical protein CISIN_1g | not DE   | not DE   | not DE   | not DE  |
| EVM0003065 | LG15 | hypothetical protein CISIN_1g | not DE   | not DE   | not DE   | not DE  |
| EVM0003954 | LG15 | hypothetical protein CISIN_1g | not DE   | not DE   | not DE   | not DE  |
| EVM0014952 | LG15 | hypothetical protein CISIN_1g | not DE   | not DE   | not DE   | not DE  |
| EVM0007501 | LG15 | hypothetical protein CISIN_1g | not DE   | not DE   | not DE   | not DE  |
| EVM0001186 | LG15 | hypothetical protein CISIN_1g | not DE   | not DE   | not DE   | not DE  |
| EVM0010713 | LG15 | hypothetical protein CISIN_1g | not DE   | not DE   | not DE   | not DE  |
| EVM0013805 | LG15 | hypothetical protein CISIN_1g | not DE   | not DE   | not DE   | not DE  |
| EVM0024335 | LG15 | hypothetical protein CISIN_1g | not DE   | not DE   | not DE   | not DE  |
| EVM0021611 | LG15 | hypothetical protein CISIN_1g | not DE   | not DE   | not DE   | not DE  |
| EVM0005319 | LG15 | hypothetical protein CISIN_1g | not DE   | not DE   | not DE   | not DE  |
| EVM0004598 | LG15 | hypothetical protein CISIN_1g | not DE   | not DE   | not DE   | not DE  |
| EVM0015009 | LG15 | hypothetical protein CISIN_1g | not DE   | not DE   | not DE   | not DE  |
| EVM0009151 | LG15 | hypothetical protein CISIN_1g | not DE   | not DE   | not DE   | not DE  |
| EVM0012236 | LG15 | hypothetical protein CISIN_1g | not DE   | not DE   | not DE   | not DE  |
| EVM0021279 | LG15 | hypothetical protein CISIN_1g | not DE   | not DE   | not DE   | not DE  |
| EVM0000203 | LG15 | hypothetical protein CISIN_1g | not DE   | not DE   | not DE   | not DE  |
| EVM0017095 | LG15 | hypothetical protein CISIN_1g | not DE   | not DE   | not DE   | not DE  |
| EVM0000167 | LG15 | hypothetical protein CISIN_1g | not DE   | not DE   | not DE   | not DE  |
| EVM0004037 | LG15 | hypothetical protein CISIN_1g | not DE   | not DE   | not DE   | not DE  |
| EVM0023857 | LG15 | hypothetical protein CISIN_1g | not DE   | not DE   | not DE   | not DE  |
| EVM0021907 | LG15 | hypothetical protein CISIN_1g | not DE   | not DE   | not DE   | not DE  |
| EVM0001393 | LG15 | hypothetical protein CISIN_1g | not DE   | not DE   | not DE   | not DE  |
| EVM0015177 | LG15 | hypothetical protein CISIN_1g | not DE   | not DE   | not DE   | not DE  |
| EVM0008849 | LG15 | hypothetical protein CISIN_1g | 1.354528 | 1.27E-05 | not DE   | not DE  |
| EVM0000544 | LG15 | hypothetical protein CISIN_1g | not DE   | not DE   | not DE   | not DE  |
| EVM0013628 | LG15 | hypothetical protein CISIN_1g | not DE   | not DE   | not DE   | not DE  |
| EVM0015908 | LG15 | hypothetical protein CISIN_1g | not DE   | not DE   | not DE   | not DE  |
| EVM0003121 | LG15 | hypothetical protein CISIN_1g | -1.08007 | 0.015443 | not DE   | not DE  |
| EVM0009575 | LG15 | hypothetical protein CISIN_1g | not DE   | not DE   | not DE   | not DE  |
| EVM0016638 | LG15 | hypothetical protein CISIN_1g | not DE   | not DE   | not DE   | not DE  |
| EVM0000795 | LG15 | hypothetical protein CISIN_1g | not DE   | not DE   | not DE   | not DE  |
| EVM0005141 | LG15 | hypothetical protein CISIN_1g | not DE   | not DE   | not DE   | not DE  |
| EVM0021289 | LG15 | hypothetical protein CISIN_1g | not DE   | not DE   | not DE   | not DE  |
| EVM0009259 | LG15 | hypothetical protein CISIN_1g | not DE   | not DE   | not DE   | not DE  |
| EVM0015251 | LG15 | hypothetical protein CISIN_1g | not DE   | not DE   | not DE   | not DE  |
| EVM0014282 | LG15 | hypothetical protein CISIN_1g | not DE   | not DE   | not DE   | not DE  |
| EVM0021089 | LG15 | hypothetical protein CISIN_1g | not DE   | not DE   | not DE   | not DE  |
| EVM0000425 | LG15 | hypothetical protein CISIN_1g | not DE   | not DE   | not DE   | not DE  |
| EVM0008715 | LG15 | hypothetical protein CISIN_1g | not DE   | not DE   | not DE   | not DE  |
| EVM0010258 | LG15 | hypothetical protein CISIN_1g | not DE   | not DE   | not DE   | not DE  |
| EVM0017347 | LG15 | hypothetical protein CISIN_1g | not DE   | not DE   | not DE   | not DE  |
| EVM0021284 | LG15 | hypothetical protein CISIN_1g | not DE   | not DE   | not DE   | not DE  |
| EVM0023752 | LG15 | hypothetical protein CISIN_1g | not DE   | not DE   | not DE   | not DE  |
| EVM0000823 | LG15 | hypothetical protein CISIN_1g | not DE   | not DE   | not DE   | not DE  |
| EVM0023669 | LG15 | hypothetical protein CISIN_1g | not DE   | not DE   | not DE   | not DE  |
| EVM0012550 | LG15 | hypothetical protein CISIN_1g | not DE   | not DE   | not DE   | not DE  |
| EVM0001670 | LG15 | hypothetical protein CISIN_1g | not DE   | not DE   | not DE   | not DE  |
| EVM0001595 | LG15 | hypothetical protein CISIN_1g | not DE   | not DE   | not DE   | not DE  |
| EVM0005986 | LG15 | hypothetical protein CISIN_1g | not DE   | not DE   | not DE   | not DE  |
| EVM0007812 | LG15 | hypothetical protein CISIN_1g | not DE   | not DE   | 2.338152 | 0.00071 |
| EVM0000627 | LG15 | hypothetical protein CISIN_1g | not DE   | not DE   | not DE   | not DE  |
| EVM0012942 | LG15 | hypothetical protein CISIN_1g | not DE   | not DE   | not DE   | not DE  |

|            |      |                               |          |          |          |         |
|------------|------|-------------------------------|----------|----------|----------|---------|
| EVM0012988 | LG15 | hypothetical protein CISIN_1g | -2.15239 | 0.015153 | not DE   | not DE  |
| EVM0010945 | LG15 | hypothetical protein CISIN_1g | not DE   | not DE   | not DE   | not DE  |
| EVM0011500 | LG15 | hypothetical protein CISIN_1g | not DE   | not DE   | not DE   | not DE  |
| EVM0002614 | LG15 | hypothetical protein CISIN_1g | not DE   | not DE   | not DE   | not DE  |
| EVM0004977 | LG15 | hypothetical protein CISIN_1g | not DE   | not DE   | not DE   | not DE  |
| EVM0006196 | LG15 | hypothetical protein CISIN_1g | not DE   | not DE   | not DE   | not DE  |
| EVM0013349 | LG15 | hypothetical protein CISIN_1g | not DE   | not DE   | not DE   | not DE  |
| EVM0010168 | LG15 | hypothetical protein CISIN_1g | not DE   | not DE   | not DE   | not DE  |
| EVM0011447 | LG15 | hypothetical protein CISIN_1g | not DE   | not DE   | not DE   | not DE  |
| EVM0002903 | LG15 | hypothetical protein CISIN_1g | not DE   | not DE   | not DE   | not DE  |
| EVM0008531 | LG15 | hypothetical protein CISIN_1g | not DE   | not DE   | not DE   | not DE  |
| EVM0019881 | LG15 | hypothetical protein CISIN_1g | not DE   | not DE   | not DE   | not DE  |
| EVM0009355 | LG15 | hypothetical protein CISIN_1g | not DE   | not DE   | 1.077391 | #####   |
| EVM0002920 | LG15 | hypothetical protein CISIN_1g | not DE   | not DE   | not DE   | not DE  |
| EVM0007110 | LG15 | hypothetical protein CISIN_1g | not DE   | not DE   | not DE   | not DE  |
| EVM0010907 | LG15 | hypothetical protein CISIN_1g | not DE   | not DE   | not DE   | not DE  |
| EVM0006962 | LG15 | hypothetical protein CISIN_1g | not DE   | not DE   | not DE   | not DE  |
| EVM0023262 | LG15 | hypothetical protein CISIN_1g | not DE   | not DE   | not DE   | not DE  |
| EVM0022834 | LG15 | hypothetical protein CISIN_1g | not DE   | not DE   | 1.604545 | 0.00072 |
| EVM0018754 | LG15 | hypothetical protein CISIN_1g | not DE   | not DE   | not DE   | not DE  |
| EVM0016450 | LG15 | hypothetical protein CISIN_1g | -1.21293 | 0.001266 | not DE   | not DE  |
| EVM0003985 | LG15 | hypothetical protein CISIN_1g | not DE   | not DE   | 1.829002 | 0.00018 |
| EVM0009381 | LG15 | hypothetical protein CISIN_1g | not DE   | not DE   | not DE   | not DE  |
| EVM0011289 | LG15 | hypothetical protein CISIN_1g | not DE   | not DE   | not DE   | not DE  |
| EVM0002620 | LG15 | hypothetical protein CISIN_1g | not DE   | not DE   | not DE   | not DE  |
| EVM0001242 | LG15 | hypothetical protein CISIN_1g | not DE   | not DE   | not DE   | not DE  |
| EVM0000281 | LG15 | hypothetical protein CISIN_1g | not DE   | not DE   | not DE   | not DE  |
| EVM0015629 | LG15 | hypothetical protein CISIN_1g | not DE   | not DE   | not DE   | not DE  |
| EVM0002978 | LG15 | hypothetical protein CISIN_1g | not DE   | not DE   | not DE   | not DE  |
| EVM0009773 | LG15 | hypothetical protein CISIN_1g | not DE   | not DE   | not DE   | not DE  |
| EVM0008684 | LG15 | hypothetical protein CISIN_1g | not DE   | not DE   | not DE   | not DE  |
| EVM0024107 | LG15 | hypothetical protein CISIN_1g | not DE   | not DE   | not DE   | not DE  |
| EVM0023273 | LG15 | hypothetical protein CISIN_1g | not DE   | not DE   | not DE   | not DE  |
| EVM0012529 | LG15 | hypothetical protein CISIN_1g | not DE   | not DE   | not DE   | not DE  |
| EVM0022011 | LG15 | hypothetical protein CISIN_1g | not DE   | not DE   | not DE   | not DE  |
| EVM0008462 | LG15 | hypothetical protein CISIN_1g | not DE   | not DE   | not DE   | not DE  |
| EVM0003119 | LG15 | hypothetical protein CISIN_1g | not DE   | not DE   | not DE   | not DE  |
| EVM0020380 | LG15 | hypothetical protein CISIN_1g | 1.045371 | 0.014386 | not DE   | not DE  |
| EVM0012751 | LG15 | hypothetical protein CISIN_1g | not DE   | not DE   | not DE   | not DE  |
| EVM0002037 | LG15 | hypothetical protein CISIN_1g | not DE   | not DE   | not DE   | not DE  |
| EVM0001469 | LG15 | hypothetical protein CISIN_1g | not DE   | not DE   | not DE   | not DE  |
| EVM0016703 | LG15 | hypothetical protein CISIN_1g | not DE   | not DE   | not DE   | not DE  |
| EVM0014176 | LG15 | hypothetical protein CISIN_1g | not DE   | not DE   | not DE   | not DE  |
| EVM0009433 | LG15 | hypothetical protein CISIN_1g | not DE   | not DE   | not DE   | not DE  |
| EVM0010538 | LG15 | hypothetical protein CISIN_1g | not DE   | not DE   | not DE   | not DE  |
| EVM0004655 | LG15 | hypothetical protein CISIN_1g | not DE   | not DE   | not DE   | not DE  |
| EVM0023850 | LG15 | hypothetical protein CISIN_1g | 1.335219 | 0.018491 | not DE   | not DE  |
| EVM0022877 | LG15 | hypothetical protein CISIN_1g | not DE   | not DE   | not DE   | not DE  |
| EVM0021371 | LG15 | hypothetical protein CISIN_1g | not DE   | not DE   | not DE   | not DE  |
| EVM0001275 | LG15 | hypothetical protein CISIN_1g | not DE   | not DE   | not DE   | not DE  |
| EVM0008019 | LG15 | hypothetical protein CISIN_1g | not DE   | not DE   | not DE   | not DE  |
| EVM0003758 | LG15 | hypothetical protein CISIN_1g | not DE   | not DE   | not DE   | not DE  |
| EVM0018308 | LG15 | hypothetical protein CISIN_1g | not DE   | not DE   | not DE   | not DE  |
| EVM0000888 | LG15 | hypothetical protein EUGRSUZ_ | not DE   | not DE   | not DE   | not DE  |

|            |      |                               |          |          |          |         |
|------------|------|-------------------------------|----------|----------|----------|---------|
| EVM0020378 | LG15 | hypothetical protein EUGRSUZ_ | not DE   | not DE   | not DE   | not DE  |
| EVM0016672 | LG15 | hypothetical protein F383_131 | not DE   | not DE   | not DE   | not DE  |
| EVM0014170 | LG15 | hypothetical protein JCGZ_011 | 2.674597 | 0.000915 | not DE   | not DE  |
| EVM0000172 | LG15 | hypothetical protein JCGZ_012 | not DE   | not DE   | not DE   | not DE  |
| EVM0003648 | LG15 | hypothetical protein JCGZ_012 | not DE   | not DE   | not DE   | not DE  |
| EVM0004625 | LG15 | hypothetical protein JCGZ_013 | not DE   | not DE   | not DE   | not DE  |
| EVM0018060 | LG15 | hypothetical protein JCGZ_013 | not DE   | not DE   | not DE   | not DE  |
| EVM0009084 | LG15 | hypothetical protein JCGZ_014 | 2.187411 | 6.71E-08 | not DE   | not DE  |
| EVM0001400 | LG15 | hypothetical protein JCGZ_014 | not DE   | not DE   | not DE   | not DE  |
| EVM0005033 | LG15 | hypothetical protein JCGZ_014 | not DE   | not DE   | not DE   | not DE  |
| EVM0009895 | LG15 | hypothetical protein JCGZ_014 | not DE   | not DE   | -1.24395 | 0.02804 |
| EVM0016755 | LG15 | hypothetical protein JCGZ_014 | not DE   | not DE   | not DE   | not DE  |
| EVM0020817 | LG15 | hypothetical protein JCGZ_014 | not DE   | not DE   | not DE   | not DE  |
| EVM0010212 | LG15 | hypothetical protein JCGZ_014 | not DE   | not DE   | not DE   | not DE  |
| EVM0020297 | LG15 | hypothetical protein JCGZ_033 | not DE   | not DE   | not DE   | not DE  |
| EVM0003372 | LG15 | hypothetical protein JCGZ_060 | not DE   | not DE   | not DE   | not DE  |
| EVM0005657 | LG15 | hypothetical protein JCGZ_066 | not DE   | not DE   | not DE   | not DE  |
| EVM0006014 | LG15 | hypothetical protein JCGZ_066 | not DE   | not DE   | not DE   | not DE  |
| EVM0015416 | LG15 | hypothetical protein JCGZ_119 | not DE   | not DE   | not DE   | not DE  |
| EVM0017752 | LG15 | hypothetical protein JCGZ_145 | not DE   | not DE   | not DE   | not DE  |
| EVM0013698 | LG15 | hypothetical protein JCGZ_153 | not DE   | not DE   | not DE   | not DE  |
| EVM0019192 | LG15 | hypothetical protein JCGZ_153 | not DE   | not DE   | not DE   | not DE  |
| EVM0002901 | LG15 | hypothetical protein JCGZ_166 | not DE   | not DE   | not DE   | not DE  |
| EVM0015031 | LG15 | hypothetical protein JCGZ_166 | not DE   | not DE   | not DE   | not DE  |
| EVM0020107 | LG15 | hypothetical protein JCGZ_172 | not DE   | not DE   | 1.18809  | #####   |
| EVM0019645 | LG15 | hypothetical protein JCGZ_184 | not DE   | not DE   | not DE   | not DE  |
| EVM0013704 | LG15 | hypothetical protein JCGZ_184 | not DE   | not DE   | -1.06625 | 0.03995 |
| EVM0009000 | LG15 | hypothetical protein JCGZ_189 | not DE   | not DE   | not DE   | not DE  |
| EVM0005827 | LG15 | hypothetical protein JCGZ_194 | not DE   | not DE   | not DE   | not DE  |
| EVM0000914 | LG15 | hypothetical protein JCGZ_200 | not DE   | not DE   | not DE   | not DE  |
| EVM0018739 | LG15 | hypothetical protein JCGZ_200 | not DE   | not DE   | not DE   | not DE  |
| EVM0005202 | LG15 | hypothetical protein JCGZ_206 | not DE   | not DE   | not DE   | not DE  |
| EVM0008009 | LG15 | hypothetical protein JCGZ_207 | not DE   | not DE   | not DE   | not DE  |
| EVM0018491 | LG15 | hypothetical protein JCGZ_209 | not DE   | not DE   | not DE   | not DE  |
| EVM0009677 | LG15 | hypothetical protein JCGZ_239 | not DE   | not DE   | not DE   | not DE  |
| EVM0021205 | LG15 | hypothetical protein JCGZ_245 | not DE   | not DE   | not DE   | not DE  |
| EVM0016676 | LG15 | hypothetical protein JCGZ_245 | not DE   | not DE   | not DE   | not DE  |
| EVM0017518 | LG15 | hypothetical protein JCGZ_245 | not DE   | not DE   | not DE   | not DE  |
| EVM0011515 | LG15 | hypothetical protein JCGZ_245 | not DE   | not DE   | not DE   | not DE  |
| EVM0012552 | LG15 | hypothetical protein JCGZ_245 | not DE   | not DE   | not DE   | not DE  |
| EVM0003924 | LG15 | hypothetical protein L484_000 | not DE   | not DE   | not DE   | not DE  |
| EVM0024614 | LG15 | hypothetical protein L484_002 | 2.347838 | 0.033371 | not DE   | not DE  |
| EVM0006203 | LG15 | hypothetical protein L484_013 | not DE   | not DE   | not DE   | not DE  |
| EVM0001774 | LG15 | hypothetical protein MIMGU_mg | not DE   | not DE   | not DE   | not DE  |
| EVM0021134 | LG15 | hypothetical protein PHAVU_00 | not DE   | not DE   | 1.075724 | #####   |
| EVM0016363 | LG15 | hypothetical protein PHAVU_00 | not DE   | not DE   | not DE   | not DE  |
| EVM0017769 | LG15 | hypothetical protein POPTR_00 | not DE   | not DE   | not DE   | not DE  |
| EVM0022265 | LG15 | hypothetical protein POPTR_00 | not DE   | not DE   | not DE   | not DE  |
| EVM0010427 | LG15 | hypothetical protein POPTR_00 | not DE   | not DE   | not DE   | not DE  |
| EVM0008734 | LG15 | hypothetical protein POPTR_00 | not DE   | not DE   | not DE   | not DE  |
| EVM0021432 | LG15 | hypothetical protein POPTR_00 | not DE   | not DE   | not DE   | not DE  |
| EVM0001605 | LG15 | hypothetical protein POPTR_00 | not DE   | not DE   | not DE   | not DE  |
| EVM0013192 | LG15 | hypothetical protein POPTR_00 | not DE   | not DE   | not DE   | not DE  |
| EVM0015628 | LG15 | hypothetical protein POPTR_00 | not DE   | not DE   | not DE   | not DE  |

|            |      |                                |          |          |          |         |
|------------|------|--------------------------------|----------|----------|----------|---------|
| EVM0017698 | LG15 | hypothetical protein POPTR_00  | not DE   | not DE   | not DE   | not DE  |
| EVM0002481 | LG15 | hypothetical protein POPTR_00  | not DE   | not DE   | not DE   | not DE  |
| EVM0011934 | LG15 | hypothetical protein POPTR_00  | not DE   | not DE   | not DE   | not DE  |
| EVM0019558 | LG15 | hypothetical protein POPTR_00  | not DE   | not DE   | not DE   | not DE  |
| EVM0007713 | LG15 | hypothetical protein POPTR_00  | not DE   | not DE   | not DE   | not DE  |
| EVM0016902 | LG15 | hypothetical protein POPTR_00  | not DE   | not DE   | not DE   | not DE  |
| EVM0012918 | LG15 | hypothetical protein POPTR_00  | not DE   | not DE   | not DE   | not DE  |
| EVM0023817 | LG15 | hypothetical protein POPTR_00  | not DE   | not DE   | not DE   | not DE  |
| EVM0019046 | LG15 | hypothetical protein POPTR_00  | not DE   | not DE   | not DE   | not DE  |
| EVM0020360 | LG15 | hypothetical protein POPTR_00  | not DE   | not DE   | not DE   | not DE  |
| EVM0005413 | LG15 | hypothetical protein POPTR_00  | not DE   | not DE   | not DE   | not DE  |
| EVM0008714 | LG15 | hypothetical protein POPTR_00  | not DE   | not DE   | 1.304198 | #####   |
| EVM0006295 | LG15 | hypothetical protein POPTR_00  | not DE   | not DE   | not DE   | not DE  |
| EVM0000306 | LG15 | hypothetical protein POPTR_00  | not DE   | not DE   | not DE   | not DE  |
| EVM0013985 | LG15 | hypothetical protein POPTR_00  | not DE   | not DE   | not DE   | not DE  |
| EVM0017812 | LG15 | hypothetical protein POPTR_00  | not DE   | not DE   | not DE   | not DE  |
| EVM0014801 | LG15 | hypothetical protein PRUPE_pp  | not DE   | not DE   | not DE   | not DE  |
| EVM0017235 | LG15 | hypothetical protein PRUPE_pp  | not DE   | not DE   | not DE   | not DE  |
| EVM0012043 | LG15 | hypothetical protein PRUPE_pp  | not DE   | not DE   | not DE   | not DE  |
| EVM0013730 | LG15 | hypothetical protein PRUPE_pp  | -1.10992 | 0.012049 | not DE   | not DE  |
| EVM0003541 | LG15 | hypothetical protein PRUPE_pp  | not DE   | not DE   | not DE   | not DE  |
| EVM0008575 | LG15 | hypothetical protein PRUPE_pp  | not DE   | not DE   | not DE   | not DE  |
| EVM0015867 | LG15 | hypothetical protein PRUPE_pp  | not DE   | not DE   | not DE   | not DE  |
| EVM0022889 | LG15 | hypothetical protein PRUPE_pp  | not DE   | not DE   | 1.481156 | 0.00046 |
| EVM0008139 | LG15 | hypothetical protein PRUPE_pp  | not DE   | not DE   | not DE   | not DE  |
| EVM0013675 | LG15 | hypothetical protein PRUPE_pp  | not DE   | not DE   | not DE   | not DE  |
| EVM0014784 | LG15 | hypothetical protein PRUPE_pp  | not DE   | not DE   | not DE   | not DE  |
| EVM0015821 | LG15 | hypothetical protein PRUPE_pp  | not DE   | not DE   | 2.224252 | 0.00041 |
| EVM0018768 | LG15 | hypothetical protein PRUPE_pp  | not DE   | not DE   | 3.322953 | 0.01412 |
| EVM0023639 | LG15 | hypothetical protein PRUPE_pp  | not DE   | not DE   | not DE   | not DE  |
| EVM0002309 | LG15 | hypothetical protein RCOM_068  | not DE   | not DE   | not DE   | not DE  |
| EVM0001454 | LG15 | hypothetical protein VITISV_0  | not DE   | not DE   | not DE   | not DE  |
| EVM0021143 | LG15 | hypothetical protein VITISV_0  | not DE   | not DE   | not DE   | not DE  |
| EVM0012743 | LG15 | hypothetical protein VITISV_0  | not DE   | not DE   | not DE   | not DE  |
| EVM0020344 | LG15 | hypothetical protein VITISV_0  | not DE   | not DE   | not DE   | not DE  |
| EVM0000728 | LG15 | hypothetical protein VITISV_0  | not DE   | not DE   | not DE   | not DE  |
| EVM0011543 | LG15 | hypothetical protein VITISV_0  | not DE   | not DE   | not DE   | not DE  |
| EVM0001291 | LG15 | hypothetical protein glysoja_  | not DE   | not DE   | not DE   | not DE  |
| EVM0017260 | LG15 | manganese superoxide dismutas  | not DE   | not DE   | not DE   | not DE  |
| EVM0021965 | LG15 | mannose/glucose-specific lect  | not DE   | not DE   | not DE   | not DE  |
| EVM0005017 | LG15 | maternal effect embryo arrest  | not DE   | not DE   | not DE   | not DE  |
| EVM0010105 | LG15 | neutral invertase              | not DE   | not DE   | not DE   | not DE  |
| EVM0006788 | LG15 | nuclease isoform 2             | not DE   | not DE   | not DE   | not DE  |
| EVM0015602 | LG15 | peptidyl-prolyl cis-trans isom | not DE   | not DE   | 1.129669 | 0.00404 |
| EVM0016045 | LG15 | peptidyl-prolyl cis-trans isom | not DE   | not DE   | not DE   | not DE  |
| EVM0007244 | LG15 | peroxidase 1                   | not DE   | not DE   | not DE   | not DE  |
| EVM0007725 | LG15 | phenylalanine ammonia-lyase    | not DE   | not DE   | not DE   | not DE  |
| EVM0005369 | LG15 | putative 26S proteasome non-A  | not DE   | not DE   | not DE   | not DE  |
| EVM0004565 | LG15 | putative aquaporin             | not DE   | not DE   | not DE   | not DE  |
| EVM0002239 | LG15 | putative methyltransferase PM  | not DE   | not DE   | not DE   | not DE  |
| EVM0000525 | LG15 | quinone oxidoreductase -like   | not DE   | not DE   | not DE   | not DE  |
| EVM0010065 | LG15 | receptor serine-threonine pro  | not DE   | not DE   | not DE   | not DE  |
| EVM0003511 | LG15 | serine-threonine protein kin   | not DE   | not DE   | not DE   | not DE  |
| EVM0021731 | LG15 | small nuclear ribonucleoprote  | not DE   | not DE   | not DE   | not DE  |

|            |      |                                                   |          |          |          |         |
|------------|------|---------------------------------------------------|----------|----------|----------|---------|
| EVM0005229 | LG15 | transaldolase                                     | not DE   | not DE   | not DE   | not DE  |
| EVM0008667 | LG15 | transcription factor, putative                    | not DE   | not DE   | not DE   | not DE  |
| EVM0001985 | LG15 | tryptophan biosynthesis protein                   | not DE   | not DE   | 1.786447 | #####   |
| EVM0018712 | LG15 | ubiquinol-cytochrome C reductase                  | not DE   | not DE   | not DE   | not DE  |
| EVM0008795 | LG15 | uncharacterized protein LOC100286511              | not DE   | not DE   | not DE   | not DE  |
| EVM0022899 | LG15 | uncharacterized protein LOC100286511              | not DE   | not DE   | not DE   | not DE  |
| EVM0000145 | LG15 | unknown protein                                   | not DE   | not DE   | not DE   | not DE  |
| EVM0000512 | LG15 | unknown protein                                   | not DE   | not DE   | not DE   | not DE  |
| EVM0000710 | LG15 | unknown protein                                   | not DE   | not DE   | not DE   | not DE  |
| EVM0000793 | LG15 | unknown protein                                   | not DE   | not DE   | not DE   | not DE  |
| EVM0005415 | LG15 | unknown protein                                   | 2.552279 | 0.006428 | not DE   | not DE  |
| EVM0009591 | LG15 | unknown protein                                   | not DE   | not DE   | not DE   | not DE  |
| EVM0009797 | LG15 | unknown protein                                   | not DE   | not DE   | not DE   | not DE  |
| EVM0010254 | LG15 | unknown protein                                   | not DE   | not DE   | not DE   | not DE  |
| EVM0010320 | LG15 | unknown protein                                   | not DE   | not DE   | not DE   | not DE  |
| EVM0011501 | LG15 | unknown protein                                   | not DE   | not DE   | not DE   | not DE  |
| EVM0016317 | LG15 | unknown protein                                   | not DE   | not DE   | not DE   | not DE  |
| EVM0018264 | LG15 | unknown protein                                   | not DE   | not DE   | not DE   | not DE  |
| EVM0020593 | LG15 | unknown protein                                   | 3.737755 | 0.000619 | not DE   | not DE  |
| EVM0022283 | LG15 | unknown protein                                   | not DE   | not DE   | not DE   | not DE  |
| EVM0022872 | LG15 | unknown protein                                   | not DE   | not DE   | not DE   | not DE  |
| EVM0001510 | LG15 | unnamed protein product                           | not DE   | not DE   | not DE   | not DE  |
| EVM0001924 | LG15 | unnamed protein product                           | not DE   | not DE   | not DE   | not DE  |
| EVM0002304 | LG15 | unnamed protein product                           | not DE   | not DE   | not DE   | not DE  |
| EVM0003653 | LG15 | unnamed protein product                           | not DE   | not DE   | not DE   | not DE  |
| EVM0004347 | LG15 | unnamed protein product                           | not DE   | not DE   | not DE   | not DE  |
| EVM0005302 | LG15 | unnamed protein product                           | not DE   | not DE   | not DE   | not DE  |
| EVM0007096 | LG15 | unnamed protein product                           | not DE   | not DE   | not DE   | not DE  |
| EVM0008033 | LG15 | unnamed protein product                           | not DE   | not DE   | not DE   | not DE  |
| EVM0010291 | LG15 | unnamed protein product                           | not DE   | not DE   | not DE   | not DE  |
| EVM0011519 | LG15 | unnamed protein product                           | not DE   | not DE   | not DE   | not DE  |
| EVM0011650 | LG15 | unnamed protein product                           | not DE   | not DE   | not DE   | not DE  |
| EVM0012737 | LG15 | unnamed protein product                           | not DE   | not DE   | not DE   | not DE  |
| EVM0013247 | LG15 | unnamed protein product                           | 11.11246 | 0.037412 | not DE   | not DE  |
| EVM0013828 | LG15 | unnamed protein product                           | not DE   | not DE   | not DE   | not DE  |
| EVM0016713 | LG15 | unnamed protein product                           | not DE   | not DE   | not DE   | not DE  |
| EVM0017389 | LG15 | unnamed protein product                           | not DE   | not DE   | not DE   | not DE  |
| EVM0018152 | LG15 | unnamed protein product                           | not DE   | not DE   | not DE   | not DE  |
| EVM0020298 | LG15 | unnamed protein product                           | not DE   | not DE   | not DE   | not DE  |
| EVM0023435 | LG15 | unnamed protein product                           | not DE   | not DE   | not DE   | not DE  |
| EVM0000186 | LG15 | uricase                                           | not DE   | not DE   | not DE   | not DE  |
| EVM0004730 | LG15 | uricase                                           | not DE   | not DE   | not DE   | not DE  |
| EVM0001005 | LG2  | (-)-germacrene D synthase                         | not DE   | not DE   | not DE   | not DE  |
| EVM0006653 | LG2  | 2-C-methyl-D-erythritol 4-phosphate dehydrogenase | not DE   | not DE   | not DE   | not DE  |
| EVM0009469 | LG2  | 2-hydroxyisoflavanone dehydrogenase               | not DE   | not DE   | 2.55724  | 0.00089 |
| EVM0005261 | LG2  | 2-methylbutanal oxime monooxygenase               | not DE   | not DE   | not DE   | not DE  |
| EVM0005491 | LG2  | 3-ketoacyl-CoA synthase 4-like                    | not DE   | not DE   | not DE   | not DE  |
| EVM0020976 | LG2  | 40S ribosomal protein S25-2                       | not DE   | not DE   | not DE   | not DE  |
| EVM0009550 | LG2  | 5'-methylthioadenosine phosphorylase              | not DE   | not DE   | not DE   | not DE  |
| EVM0022744 | LG2  | 52 kDa repressor of the inhibitory sigma factor   | not DE   | not DE   | not DE   | not DE  |
| EVM0013416 | LG2  | ABC transporter G family member 1                 | not DE   | not DE   | not DE   | not DE  |
| EVM0024577 | LG2  | ADP, ATP carrier protein 1, mitochondrial         | not DE   | not DE   | not DE   | not DE  |
| EVM0007415 | LG2  | ADP-ribosylation factor 1-like                    | 1.648166 | 0.012172 | not DE   | not DE  |
| EVM0022415 | LG2  | ATP phosphoribosyltransferase                     | -1.09898 | 0.013278 | not DE   | not DE  |



|            |     |                               |          |          |          |        |
|------------|-----|-------------------------------|----------|----------|----------|--------|
| EVM0000399 | LG2 | ATP-dependent Clp protease A  | -1.43216 | 1.31E-05 | not DE   | not DE |
| EVM0024581 | LG2 | ATP-dependent Clp protease A  | not DE   | not DE   | not DE   | not DE |
| EVM0023747 | LG2 | ATP-dependent DNA helicase C  | not DE   | not DE   | not DE   | not DE |
| EVM0004331 | LG2 | ATP-dependent RNA helicase D  | not DE   | not DE   | not DE   | not DE |
| EVM0020385 | LG2 | B3 domain-containing protein  | not DE   | not DE   | not DE   | not DE |
| EVM0000964 | LG2 | B3 domain-containing transcr  | not DE   | not DE   | not DE   | not DE |
| EVM0001619 | LG2 | B3 domain-containing transcr  | not DE   | not DE   | not DE   | not DE |
| EVM0005709 | LG2 | B3 domain-containing transcr  | not DE   | not DE   | not DE   | not DE |
| EVM0006945 | LG2 | B3 domain-containing transcr  | not DE   | not DE   | not DE   | not DE |
| EVM0010601 | LG2 | B3 domain-containing transcr  | not DE   | not DE   | not DE   | not DE |
| EVM0013663 | LG2 | B3 domain-containing transcr  | not DE   | not DE   | not DE   | not DE |
| EVM0016108 | LG2 | B3 domain-containing transcr  | not DE   | not DE   | not DE   | not DE |
| EVM0020068 | LG2 | B3 domain-containing transcr  | not DE   | not DE   | not DE   | not DE |
| EVM0024314 | LG2 | B3 domain-containing transcr  | not DE   | not DE   | not DE   | not DE |
| EVM0022540 | LG2 | BEL1-like homeodomain protei  | not DE   | not DE   | not DE   | not DE |
| EVM0022126 | LG2 | BRASSINOSTEROID INSENSITIVE   | not DE   | not DE   | not DE   | not DE |
| EVM0020468 | LG2 | CDP-diaclyglycerol--inositol  | not DE   | not DE   | not DE   | not DE |
| EVM0016400 | LG2 | CDPK-related kinase 5         | not DE   | not DE   | not DE   | not DE |
| EVM0019825 | LG2 | CDPK-related kinase 5-like    | not DE   | not DE   | not DE   | not DE |
| EVM0013014 | LG2 | COBRA-like protein 6-like     | not DE   | not DE   | not DE   | not DE |
| EVM0024341 | LG2 | COBRA-like protein 6-like     | not DE   | not DE   | not DE   | not DE |
| EVM0021908 | LG2 | COX assembly mitochondrial p  | not DE   | not DE   | not DE   | not DE |
| EVM0022118 | LG2 | COX assembly mitochondrial p  | not DE   | not DE   | not DE   | not DE |
| EVM0004885 | LG2 | CYSTM1 family protein A-like  | not DE   | not DE   | not DE   | not DE |
| EVM0002407 | LG2 | DDB1- and CUL4-associated fa  | not DE   | not DE   | not DE   | not DE |
| EVM0004891 | LG2 | DNA (cytosine-5)-methyltrans  | not DE   | not DE   | not DE   | not DE |
| EVM0002210 | LG2 | DNA helicase MCM9-like isofo  | not DE   | not DE   | not DE   | not DE |
| EVM0018887 | LG2 | DNA polymerase V-like isofo   | not DE   | not DE   | -1.08246 | #####  |
| EVM0001321 | LG2 | DNA repair protein REV1-like  | not DE   | not DE   | not DE   | not DE |
| EVM0019376 | LG2 | DNA replication licensing fa  | not DE   | not DE   | not DE   | not DE |
| EVM0015692 | LG2 | E3 ubiquitin-protein ligase   | not DE   | not DE   | not DE   | not DE |
| EVM0024152 | LG2 | E3 ubiquitin-protein ligase   | not DE   | not DE   | -1.28027 | #####  |
| EVM0018227 | LG2 | F-box protein Atlg10780-like  | not DE   | not DE   | not DE   | not DE |
| EVM0001224 | LG2 | F-box protein CPR30-like      | not DE   | not DE   | not DE   | not DE |
| EVM0005196 | LG2 | F-box/kelch-repeat protein A  | not DE   | not DE   | not DE   | not DE |
| EVM0008420 | LG2 | FAD-linked sulphhydryl oxidas | 1.832058 | 0.014599 | not DE   | not DE |
| EVM0010725 | LG2 | GATA transcription factor 5-  | not DE   | not DE   | not DE   | not DE |
| EVM0005625 | LG2 | GDSL esterase/lipase Atlg296  | not DE   | not DE   | not DE   | not DE |
| EVM0008330 | LG2 | GDSL esterase/lipase Atlg296  | not DE   | not DE   | not DE   | not DE |
| EVM0023944 | LG2 | GDSL esterase/lipase Atlg296  | not DE   | not DE   | not DE   | not DE |
| EVM0023902 | LG2 | GDSL esterase/lipase Atlg296  | not DE   | not DE   | not DE   | not DE |
| EVM0004017 | LG2 | GDSL esterase/lipase Atlg296  | not DE   | not DE   | not DE   | not DE |
| EVM0008781 | LG2 | GDSL esterase/lipase Atlg296  | not DE   | not DE   | not DE   | not DE |
| EVM0010084 | LG2 | GDSL esterase/lipase Atlg296  | not DE   | not DE   | not DE   | not DE |
| EVM0011335 | LG2 | GDSL esterase/lipase Atlg296  | not DE   | not DE   | not DE   | not DE |
| EVM0013001 | LG2 | HVA22-like protein i-like     | not DE   | not DE   | not DE   | not DE |
| EVM0003588 | LG2 | K(+) efflux antiporter 3, ch  | not DE   | not DE   | not DE   | not DE |
| EVM0001457 | LG2 | KH domain-containing protein  | not DE   | not DE   | not DE   | not DE |
| EVM0011043 | LG2 | L-type lectin-domain contain  | not DE   | not DE   | not DE   | not DE |
| EVM0000114 | LG2 | LAG1 longevity assurance hom  | not DE   | not DE   | not DE   | not DE |
| EVM0006041 | LG2 | LAG1 longevity assurance hom  | not DE   | not DE   | not DE   | not DE |
| EVM0022701 | LG2 | LOB domain-containing protei  | not DE   | not DE   | not DE   | not DE |
| EVM0018306 | LG2 | LOW QUALITY PROTEIN: calcium  | not DE   | not DE   | not DE   | not DE |
| EVM0007320 | LG2 | LOW QUALITY PROTEIN: unchara  | not DE   | not DE   | not DE   | not DE |

|            |     |                              |          |          |          |         |
|------------|-----|------------------------------|----------|----------|----------|---------|
| EVM0008884 | LG2 | LRR receptor-like serine/thr | not DE   | not DE   | not DE   | not DE  |
| EVM0011197 | LG2 | LYR motif-containing protein | not DE   | not DE   | 1.959896 | 0.00308 |
| EVM0021927 | LG2 | MADS-box transcription facto | not DE   | not DE   | not DE   | not DE  |
| EVM0015061 | LG2 | MATE efflux family protein 3 | not DE   | not DE   | not DE   | not DE  |
| EVM0011619 | LG2 | MATE efflux family protein 4 | not DE   | not DE   | not DE   | not DE  |
| EVM0010804 | LG2 | MATE efflux family protein 4 | not DE   | not DE   | not DE   | not DE  |
| EVM0017213 | LG2 | NAC transcription factor 25- | not DE   | not DE   | not DE   | not DE  |
| EVM0004692 | LG2 | NADH dehydrogenase           | not DE   | not DE   | 1.093774 | #####   |
| EVM0019292 | LG2 | O-acyltransferase WSD1-like  | not DE   | not DE   | not DE   | not DE  |
| EVM0023450 | LG2 | PRKR-interacting protein 1-l | not DE   | not DE   | not DE   | not DE  |
| EVM0000539 | LG2 | RING-H2 finger protein ATL54 | not DE   | not DE   | not DE   | not DE  |
| EVM0011888 | LG2 | RING-H2 finger protein ATL54 | not DE   | not DE   | not DE   | not DE  |
| EVM0001084 | LG2 | RNA pseudouridine synthase 4 | not DE   | not DE   | -1.76878 | 0.00989 |
| EVM0003295 | LG2 | RNA-binding protein 28-like  | not DE   | not DE   | not DE   | not DE  |
| EVM0015318 | LG2 | RNA-binding protein 39-like  | not DE   | not DE   | not DE   | not DE  |
| EVM0007021 | LG2 | RNA-binding protein 5-A-like | not DE   | not DE   | not DE   | not DE  |
| EVM0001522 | LG2 | SNF2 domain-containing prote | not DE   | not DE   | not DE   | not DE  |
| EVM0020062 | LG2 | SUMO-activating enzyme subun | not DE   | not DE   | not DE   | not DE  |
| EVM0022828 | LG2 | U-box domain-containing prot | not DE   | not DE   | not DE   | not DE  |
| EVM0002787 | LG2 | U-box domain-containing prot | not DE   | not DE   | not DE   | not DE  |
| EVM0004335 | LG2 | U3 small nucleolar ribonucle | not DE   | not DE   | not DE   | not DE  |
| EVM0023283 | LG2 | UDP-glycosyltransferase 84B2 | not DE   | not DE   | not DE   | not DE  |
| EVM0006635 | LG2 | UPF0481 protein At3g47200-li | not DE   | not DE   | not DE   | not DE  |
| EVM0006786 | LG2 | UPF0481 protein At3g47200-li | not DE   | not DE   | not DE   | not DE  |
| EVM0015050 | LG2 | UPF0481 protein At3g47200-li | not DE   | not DE   | not DE   | not DE  |
| EVM0023445 | LG2 | UPF0481 protein At3g47200-li | not DE   | not DE   | not DE   | not DE  |
| EVM0005601 | LG2 | V-type proton ATPase subunit | not DE   | not DE   | not DE   | not DE  |
| EVM0005714 | LG2 | WD repeat-containing protein | not DE   | not DE   | not DE   | not DE  |
| EVM0014179 | LG2 | WD repeat-containing protein | not DE   | not DE   | not DE   | not DE  |
| EVM0003640 | LG2 | WD-40 repeat-containing prot | 1.000004 | 0.013518 | not DE   | not DE  |
| EVM0014373 | LG2 | actin-101                    | not DE   | not DE   | -1.45296 | 0.02688 |
| EVM0020922 | LG2 | agamous-like MADS-box protei | not DE   | not DE   | not DE   | not DE  |
| EVM0021971 | LG2 | agamous-like MADS-box protei | not DE   | not DE   | not DE   | not DE  |
| EVM0019115 | LG2 | alkaline/neutral invertase C | not DE   | not DE   | not DE   | not DE  |
| EVM0002172 | LG2 | amino acid permease 6-like   | not DE   | not DE   | not DE   | not DE  |
| EVM0005979 | LG2 | amino acid permease 6-like   | not DE   | not DE   | not DE   | not DE  |
| EVM0001336 | LG2 | ankyrin repeat, bromo and BT | not DE   | not DE   | not DE   | not DE  |
| EVM0012500 | LG2 | ankyrin repeat, bromo and BT | not DE   | not DE   | not DE   | not DE  |
| EVM0017453 | LG2 | armadillo repeat-containing  | not DE   | not DE   | not DE   | not DE  |
| EVM0018222 | LG2 | aspartate--tRNA ligase, mito | not DE   | not DE   | not DE   | not DE  |
| EVM0014916 | LG2 | auxin response factor 1      | not DE   | not DE   | not DE   | not DE  |
| EVM0006704 | LG2 | auxin response factor 9      | not DE   | not DE   | not DE   | not DE  |
| EVM0000478 | LG2 | auxin-induced protein 6B-lik | not DE   | not DE   | not DE   | not DE  |
| EVM0001974 | LG2 | auxin-induced protein 6B-lik | not DE   | not DE   | not DE   | not DE  |
| EVM0002463 | LG2 | auxin-induced protein 6B-lik | not DE   | not DE   | not DE   | not DE  |
| EVM0007931 | LG2 | auxin-induced protein 6B-lik | not DE   | not DE   | not DE   | not DE  |
| EVM0009255 | LG2 | auxin-induced protein 6B-lik | not DE   | not DE   | not DE   | not DE  |
| EVM0016875 | LG2 | auxin-induced protein 6B-lik | not DE   | not DE   | not DE   | not DE  |
| EVM0018782 | LG2 | auxin-induced protein 6B-lik | not DE   | not DE   | not DE   | not DE  |
| EVM0019834 | LG2 | axoneme-associated protein m | not DE   | not DE   | not DE   | not DE  |
| EVM0020454 | LG2 | axoneme-associated protein m | not DE   | not DE   | not DE   | not DE  |
| EVM0022651 | LG2 | basic blue protein           | not DE   | not DE   | not DE   | not DE  |
| EVM0007073 | LG2 | basic form of pathogenesis-r | not DE   | not DE   | not DE   | not DE  |
| EVM0005329 | LG2 | beta-fructofuranosidase, ins | not DE   | not DE   | not DE   | not DE  |

|            |     |                              |          |          |          |         |
|------------|-----|------------------------------|----------|----------|----------|---------|
| EVM0024239 | LG2 | beta-galactosidase 3-like    | -3.99543 | 0.001627 | not DE   | not DE  |
| EVM0014252 | LG2 | beta-glucosidase 44-like     | not DE   | not DE   | not DE   | not DE  |
| EVM0016265 | LG2 | beta-glucosidase 44-like     | not DE   | not DE   | not DE   | not DE  |
| EVM0018672 | LG2 | beta-glucosidase 44-like     | not DE   | not DE   | not DE   | not DE  |
| EVM0018892 | LG2 | beta-glucosidase 44-like     | not DE   | not DE   | not DE   | not DE  |
| EVM0009003 | LG2 | beta-xylosidase/alpha-L-arab | not DE   | not DE   | not DE   | not DE  |
| EVM0004938 | LG2 | carbonic anhydrase 1-like is | not DE   | not DE   | not DE   | not DE  |
| EVM0006600 | LG2 | carbonyl reductase family me | not DE   | not DE   | not DE   | not DE  |
| EVM0010468 | LG2 | carbonyl reductase family me | not DE   | not DE   | not DE   | not DE  |
| EVM0014514 | LG2 | chloride channel protein CLC | not DE   | not DE   | not DE   | not DE  |
| EVM0008775 | LG2 | chloride channel protein CLC | not DE   | not DE   | not DE   | not DE  |
| EVM0006280 | LG2 | chlorophyll a-b binding prot | -2.08661 | 0.000868 | not DE   | not DE  |
| EVM0018053 | LG2 | cinnamoyl-CoA reductase 1-li | not DE   | not DE   | 1.457051 | 0.01556 |
| EVM0018037 | LG2 | coiled-coil domain-containin | not DE   | not DE   | not DE   | not DE  |
| EVM0020747 | LG2 | coiled-coil domain-containin | not DE   | not DE   | not DE   | not DE  |
| EVM0007578 | LG2 | copper-transporting ATPase P | not DE   | not DE   | not DE   | not DE  |
| EVM0024071 | LG2 | cx9C motif-containing protei | not DE   | not DE   | not DE   | not DE  |
| EVM0014943 | LG2 | cyclin-B2-3-like             | not DE   | not DE   | 2.29697  | 0.02146 |
| EVM0000737 | LG2 | cyclin-D-binding Myb-like tr | not DE   | not DE   | not DE   | not DE  |
| EVM0009504 | LG2 | cyclin-D3-1-like             | not DE   | not DE   | not DE   | not DE  |
| EVM0001197 | LG2 | cyclin-dependent kinase inh  | not DE   | not DE   | not DE   | not DE  |
| EVM0005215 | LG2 | cysteine proteinase 15A-like | not DE   | not DE   | not DE   | not DE  |
| EVM0000219 | LG2 | cysteine proteinase RD21a-li | 2.306608 | 0.00063  | not DE   | not DE  |
| EVM0011104 | LG2 | cytochrome P450 84A1-like    | not DE   | not DE   | not DE   | not DE  |
| EVM0014558 | LG2 | d-3-phosphoglycerate dehydro | not DE   | not DE   | not DE   | not DE  |
| EVM0018643 | LG2 | diaminopimelate decarboxylas | not DE   | not DE   | not DE   | not DE  |
| EVM0000444 | LG2 | dicarboxylate transporter 2. | not DE   | not DE   | not DE   | not DE  |
| EVM0009205 | LG2 | diphthamide biosynthesis pro | not DE   | not DE   | not DE   | not DE  |
| EVM0015793 | LG2 | dynamin-2A                   | not DE   | not DE   | not DE   | not DE  |
| EVM0024060 | LG2 | dynamin-2A                   | not DE   | not DE   | not DE   | not DE  |
| EVM0005380 | LG2 | dynamin-like protein ARC5-li | not DE   | not DE   | not DE   | not DE  |
| EVM0023085 | LG2 | elicitor-responsive protein  | not DE   | not DE   | not DE   | not DE  |
| EVM0006524 | LG2 | elongation factor 1-gamma-li | not DE   | not DE   | not DE   | not DE  |
| EVM0016494 | LG2 | embryogenesis-associated pro | not DE   | not DE   | not DE   | not DE  |
| EVM0007868 | LG2 | ethylene-responsive transcri | not DE   | not DE   | not DE   | not DE  |
| EVM0017944 | LG2 | ethylene-responsive transcri | 3.896825 | 0.047018 | not DE   | not DE  |
| EVM0012192 | LG2 | exopolygalacturonase-like    | not DE   | not DE   | not DE   | not DE  |
| EVM0000437 | LG2 | expansin-like A1-like        | not DE   | not DE   | not DE   | not DE  |
| EVM0008641 | LG2 | formin-like protein 5-like i | not DE   | not DE   | not DE   | not DE  |
| EVM0023607 | LG2 | glutamate--tRNA ligase, chlo | not DE   | not DE   | not DE   | not DE  |
| EVM0005099 | LG2 | glutathione S-transferase ze | not DE   | not DE   | not DE   | not DE  |
| EVM0007431 | LG2 | glutathione S-transferase ze | not DE   | not DE   | not DE   | not DE  |
| EVM0000213 | LG2 | glutathione S-transferase ze | not DE   | not DE   | not DE   | not DE  |
| EVM0008353 | LG2 | glutathione S-transferase ze | not DE   | not DE   | not DE   | not DE  |
| EVM0009182 | LG2 | glutathione S-transferase ze | not DE   | not DE   | not DE   | not DE  |
| EVM0015466 | LG2 | glutathione S-transferase ze | not DE   | not DE   | not DE   | not DE  |
| EVM0015518 | LG2 | glutathione S-transferase ze | not DE   | not DE   | not DE   | not DE  |
| EVM0015827 | LG2 | glutathione S-transferase ze | not DE   | not DE   | not DE   | not DE  |
| EVM0017751 | LG2 | glutathione S-transferase ze | not DE   | not DE   | not DE   | not DE  |
| EVM0008528 | LG2 | glutelin type-B 2-like isof  | not DE   | not DE   | not DE   | not DE  |
| EVM0007565 | LG2 | glutelin type-B 2-like isof  | not DE   | not DE   | not DE   | not DE  |
| EVM0016393 | LG2 | glutelin type-B 2-like isof  | not DE   | not DE   | not DE   | not DE  |
| EVM0019765 | LG2 | glutelin type-B 2-like isof  | not DE   | not DE   | not DE   | not DE  |
| EVM0021142 | LG2 | glutelin type-B 2-like isof  | not DE   | not DE   | not DE   | not DE  |

|            |     |                                |          |          |          |         |
|------------|-----|--------------------------------|----------|----------|----------|---------|
| EVM0022336 | LG2 | glutelin type-B 2-like isoform | not DE   | not DE   | not DE   | not DE  |
| EVM0019819 | LG2 | glycerate dehydrogenase        | not DE   | not DE   | not DE   | not DE  |
| EVM0012170 | LG2 | heat shock 70 kDa protein 6,   | not DE   | not DE   | -1.34692 | #####   |
| EVM0008597 | LG2 | heat shock 70 kDa protein, m   | -1.52327 | 0.011478 | -1.85347 | #####   |
| EVM0008278 | LG2 | hippocampus abundant transcr   | not DE   | not DE   | not DE   | not DE  |
| EVM0016771 | LG2 | histidine biosynthesis bifur   | not DE   | not DE   | not DE   | not DE  |
| EVM0000228 | LG2 | histone deacetylase 6-like     | not DE   | not DE   | not DE   | not DE  |
| EVM0023559 | LG2 | indole-3-acetic acid-induced   | not DE   | not DE   | not DE   | not DE  |
| EVM0017756 | LG2 | inositol-tetrakisphosphate 1   | not DE   | not DE   | not DE   | not DE  |
| EVM0014781 | LG2 | isocitrate dehydrogenase       | not DE   | not DE   | not DE   | not DE  |
| EVM0003039 | LG2 | isoflavone 2&apos;-hydroxyla   | not DE   | not DE   | not DE   | not DE  |
| EVM0022437 | LG2 | isoflavone 2&apos;-hydroxyla   | not DE   | not DE   | not DE   | not DE  |
| EVM0013570 | LG2 | kinesin-related protein 11-l   | -1.72763 | 0.041039 | not DE   | not DE  |
| EVM0018370 | LG2 | kinetochore protein NDC80 ho   | not DE   | not DE   | not DE   | not DE  |
| EVM0024543 | LG2 | kinetochore protein NDC80 ho   | not DE   | not DE   | not DE   | not DE  |
| EVM0021442 | LG2 | leucine-rich repeat receptor   | -1.80365 | 0.03172  | not DE   | not DE  |
| EVM0013304 | LG2 | lysM domain-containing GPI-a   | not DE   | not DE   | not DE   | not DE  |
| EVM0001327 | LG2 | lysine histidine transporter   | not DE   | not DE   | -2.48111 | 0.0482  |
| EVM0009221 | LG2 | lysine histidine transporter   | not DE   | not DE   | not DE   | not DE  |
| EVM0000551 | LG2 | magnesium transporter MRS2-3   | not DE   | not DE   | not DE   | not DE  |
| EVM0009842 | LG2 | magnesium transporter NIPA2-   | not DE   | not DE   | not DE   | not DE  |
| EVM0016549 | LG2 | magnesium-dependent phosphat   | not DE   | not DE   | not DE   | not DE  |
| EVM0013173 | LG2 | malate dehydrogenase, glyoxy   | not DE   | not DE   | not DE   | not DE  |
| EVM0019930 | LG2 | malate dehydrogenase, glyoxy   | not DE   | not DE   | not DE   | not DE  |
| EVM0007301 | LG2 | mechanosensitive ion channel   | not DE   | not DE   | not DE   | not DE  |
| EVM0010875 | LG2 | mediator of RNA polymerase I   | not DE   | not DE   | not DE   | not DE  |
| EVM0018082 | LG2 | mediator of RNA polymerase I   | not DE   | not DE   | not DE   | not DE  |
| EVM0003715 | LG2 | metacaspase-1-like             | not DE   | not DE   | not DE   | not DE  |
| EVM0000019 | LG2 | metacaspase-1-like isoform X   | not DE   | not DE   | 1.10363  | 0.00088 |
| EVM0009908 | LG2 | metacaspase-1-like isoform X   | not DE   | not DE   | not DE   | not DE  |
| EVM0003064 | LG2 | methionine S-methyltransfera   | not DE   | not DE   | not DE   | not DE  |
| EVM0010986 | LG2 | methylesterase 10-like         | not DE   | not DE   | not DE   | not DE  |
| EVM0016823 | LG2 | methylthioribose kinase-like   | not DE   | not DE   | not DE   | not DE  |
| EVM0019167 | LG2 | methylthioribose kinase-like   | not DE   | not DE   | not DE   | not DE  |
| EVM0011905 | LG2 | mitochondrial import recepto   | not DE   | not DE   | 1.052794 | 0.01479 |
| EVM0002199 | LG2 | mitochondrial outer membrane   | 2.030622 | 0.020068 | not DE   | not DE  |
| EVM0013034 | LG2 | mitochondrial outer membrane   | not DE   | not DE   | not DE   | not DE  |
| EVM0011510 | LG2 | mitochondrial outer membrane   | not DE   | not DE   | not DE   | not DE  |
| EVM0014063 | LG2 | mitochondrial phosphate carr   | not DE   | not DE   | 1.57127  | #####   |
| EVM0004059 | LG2 | mitogen-activated protein ki   | not DE   | not DE   | not DE   | not DE  |
| EVM0016338 | LG2 | mitogen-activated protein ki   | not DE   | not DE   | not DE   | not DE  |
| EVM0017303 | LG2 | mitogen-activated protein ki   | not DE   | not DE   | not DE   | not DE  |
| EVM0014318 | LG2 | monoacylglycerol lipase ABHD   | not DE   | not DE   | 3.677738 | #####   |
| EVM0019368 | LG2 | monoacylglycerol lipase ABHD   | not DE   | not DE   | not DE   | not DE  |
| EVM0024117 | LG2 | monosaccharide-sensing prote   | not DE   | not DE   | not DE   | not DE  |
| EVM0010307 | LG2 | multiple RNA-binding domain-   | not DE   | not DE   | not DE   | not DE  |
| EVM0008814 | LG2 | myb-like protein X-like isof   | not DE   | not DE   | not DE   | not DE  |
| EVM0017323 | LG2 | myosin-2 heavy chain-like is   | not DE   | not DE   | not DE   | not DE  |
| EVM0009771 | LG2 | neurofilament medium polypep   | not DE   | not DE   | not DE   | not DE  |
| EVM0010475 | LG2 | nifU-like protein 2, chlorop   | not DE   | not DE   | not DE   | not DE  |
| EVM0019990 | LG2 | nitronate monooxygenase        | not DE   | not DE   | not DE   | not DE  |
| EVM0001256 | LG2 | non-lysosomal glucosylcerami   | not DE   | not DE   | not DE   | not DE  |
| EVM0015500 | LG2 | non-lysosomal glucosylcerami   | not DE   | not DE   | not DE   | not DE  |
| EVM0017254 | LG2 | non-specific lipid-transfer    | not DE   | not DE   | not DE   | not DE  |

|            |     |                              |          |          |          |         |
|------------|-----|------------------------------|----------|----------|----------|---------|
| EVM0005175 | LG2 | nuclear pore complex protein | not DE   | not DE   | not DE   | not DE  |
| EVM0018475 | LG2 | nuclear ribonuclease Z-like  | not DE   | not DE   | not DE   | not DE  |
| EVM0005554 | LG2 | oligopeptide transporter 4-l | not DE   | not DE   | -2.55444 | 0.00028 |
| EVM0021538 | LG2 | oligopeptide transporter 4-l | not DE   | not DE   | not DE   | not DE  |
| EVM0001523 | LG2 | organ-specific protein S2-li | not DE   | not DE   | not DE   | not DE  |
| EVM0002107 | LG2 | organ-specific protein S2-li | not DE   | not DE   | not DE   | not DE  |
| EVM0015311 | LG2 | patatin-like phospholipase d | not DE   | not DE   | not DE   | not DE  |
| EVM0002711 | LG2 | pathogenesis-related protein | not DE   | not DE   | not DE   | not DE  |
| EVM0011112 | LG2 | pathogenesis-related protein | not DE   | not DE   | not DE   | not DE  |
| EVM0015505 | LG2 | pathogenesis-related protein | not DE   | not DE   | not DE   | not DE  |
| EVM0016524 | LG2 | pathogenesis-related protein | not DE   | not DE   | not DE   | not DE  |
| EVM0024602 | LG2 | pathogenesis-related protein | not DE   | not DE   | not DE   | not DE  |
| EVM0002990 | LG2 | pathogenesis-related protein | not DE   | not DE   | not DE   | not DE  |
| EVM0017369 | LG2 | pentatricopeptide repeat-con | not DE   | not DE   | not DE   | not DE  |
| EVM0020714 | LG2 | pentatricopeptide repeat-con | not DE   | not DE   | not DE   | not DE  |
| EVM0017117 | LG2 | pentatricopeptide repeat-con | 2.361514 | 9.32E-11 | not DE   | not DE  |
| EVM0012107 | LG2 | pentatricopeptide repeat-con | 2.19351  | 0.000137 | not DE   | not DE  |
| EVM0008339 | LG2 | pentatricopeptide repeat-con | not DE   | not DE   | not DE   | not DE  |
| EVM0022854 | LG2 | pentatricopeptide repeat-con | 2.611804 | 3.00E-07 | not DE   | not DE  |
| EVM0006373 | LG2 | pentatricopeptide repeat-con | not DE   | not DE   | not DE   | not DE  |
| EVM0007955 | LG2 | pentatricopeptide repeat-con | not DE   | not DE   | not DE   | not DE  |
| EVM0024522 | LG2 | pentatricopeptide repeat-con | not DE   | not DE   | not DE   | not DE  |
| EVM0016682 | LG2 | pentatricopeptide repeat-con | not DE   | not DE   | not DE   | not DE  |
| EVM0004709 | LG2 | peptide methionine sulfoxide | not DE   | not DE   | not DE   | not DE  |
| EVM0018481 | LG2 | peptidyl-prolyl cis-trans is | not DE   | not DE   | not DE   | not DE  |
| EVM0021288 | LG2 | peptidyl-prolyl cis-trans is | not DE   | not DE   | not DE   | not DE  |
| EVM0002820 | LG2 | periaxin-like                | not DE   | not DE   | not DE   | not DE  |
| EVM0014660 | LG2 | peroxidase 43-like           | not DE   | not DE   | not DE   | not DE  |
| EVM0003567 | LG2 | phosphatidylinositol 4-phosp | not DE   | not DE   | not DE   | not DE  |
| EVM0003712 | LG2 | phosphatidylinositol 4-phosp | not DE   | not DE   | not DE   | not DE  |
| EVM0013562 | LG2 | phosphatidylinositol/phospha | not DE   | not DE   | not DE   | not DE  |
| EVM0022737 | LG2 | phosphatidylserine decarboxy | not DE   | not DE   | not DE   | not DE  |
| EVM0000784 | LG2 | phosphoglycerate mutase-like | not DE   | not DE   | not DE   | not DE  |
| EVM0006008 | LG2 | phototropin-2-like isoform X | not DE   | not DE   | not DE   | not DE  |
| EVM0001675 | LG2 | phytoene dehydrogenase, chlo | not DE   | not DE   | -1.03487 | 0.01858 |
| EVM0008103 | LG2 | phytosulfokines              | not DE   | not DE   | not DE   | not DE  |
| EVM0022349 | LG2 | polyadenylate-binding protei | not DE   | not DE   | not DE   | not DE  |
| EVM0016933 | LG2 | polyadenylate-binding protei | not DE   | not DE   | not DE   | not DE  |
| EVM0003244 | LG2 | polyprenol reductase 2       | not DE   | not DE   | not DE   | not DE  |
| EVM0008495 | LG2 | polyprenol reductase 2-like  | not DE   | not DE   | not DE   | not DE  |
| EVM0019743 | LG2 | potassium channel AKT2/3-lik | not DE   | not DE   | not DE   | not DE  |
| EVM0012962 | LG2 | pre-mRNA-processing protein  | not DE   | not DE   | not DE   | not DE  |
| EVM0009933 | LG2 | pre-mRNA-splicing factor syf | not DE   | not DE   | not DE   | not DE  |
| EVM0011639 | LG2 | probable 1-acyl-sn-glycerol- | not DE   | not DE   | not DE   | not DE  |
| EVM0003904 | LG2 | probable 3-hydroxyisobutyrat | not DE   | not DE   | not DE   | not DE  |
| EVM0023914 | LG2 | probable 3-hydroxyisobutyrat | not DE   | not DE   | not DE   | not DE  |
| EVM0010833 | LG2 | probable E3 ubiquitin ligase | not DE   | not DE   | not DE   | not DE  |
| EVM0019631 | LG2 | probable L-type lectin-domai | 2.717545 | 0.005805 | not DE   | not DE  |
| EVM0010227 | LG2 | probable LL-diaminopimelate  | not DE   | not DE   | not DE   | not DE  |
| EVM0005956 | LG2 | probable LRR receptor-like s | not DE   | not DE   | not DE   | not DE  |
| EVM0007753 | LG2 | probable alanine--tRNA ligas | not DE   | not DE   | not DE   | not DE  |
| EVM0024570 | LG2 | probable aquaporin PIP2-8    | -2.14991 | 0.03941  | not DE   | not DE  |
| EVM0016156 | LG2 | probable aquaporin PIP2-8-li | not DE   | not DE   | not DE   | not DE  |
| EVM0001418 | LG2 | probable carboxylesterase 12 | not DE   | not DE   | not DE   | not DE  |

|            |     |                               |          |          |          |         |
|------------|-----|-------------------------------|----------|----------|----------|---------|
| EVM0001615 | LG2 | probable carboxylesterase 12  | not DE   | not DE   | not DE   | not DE  |
| EVM0007586 | LG2 | probable carboxylesterase 12  | 2.246649 | 0.006897 | not DE   | not DE  |
| EVM0012655 | LG2 | probable carboxylesterase 12  | not DE   | not DE   | not DE   | not DE  |
| EVM0014125 | LG2 | probable carboxylesterase 12  | not DE   | not DE   | not DE   | not DE  |
| EVM0015643 | LG2 | probable carboxylesterase 12  | -1.96939 | 0.022527 | 1.0882   | 0.02955 |
| EVM0022631 | LG2 | probable carboxylesterase 12  | not DE   | not DE   | not DE   | not DE  |
| EVM0022917 | LG2 | probable carboxylesterase 12  | not DE   | not DE   | not DE   | not DE  |
| EVM0023096 | LG2 | probable carboxylesterase 12  | not DE   | not DE   | not DE   | not DE  |
| EVM0024423 | LG2 | probable carboxylesterase 12  | not DE   | not DE   | not DE   | not DE  |
| EVM0009306 | LG2 | probable carboxylesterase 13  | -2.17632 | 0.019778 | not DE   | not DE  |
| EVM0009930 | LG2 | probable dimethyladenosine t  | not DE   | not DE   | not DE   | not DE  |
| EVM0004030 | LG2 | probable flavin-containing m  | not DE   | not DE   | not DE   | not DE  |
| EVM0008286 | LG2 | probable flavin-containing m  | not DE   | not DE   | not DE   | not DE  |
| EVM0020382 | LG2 | probable flavin-containing m  | not DE   | not DE   | not DE   | not DE  |
| EVM0002886 | LG2 | probable glycosyltransferase  | not DE   | not DE   | not DE   | not DE  |
| EVM0013311 | LG2 | probable homoserine kinase-1  | not DE   | not DE   | not DE   | not DE  |
| EVM0005051 | LG2 | probable inactive purple aci  | -1.58805 | 0.002029 | not DE   | not DE  |
| EVM0020481 | LG2 | probable inactive receptor k  | not DE   | not DE   | not DE   | not DE  |
| EVM0009124 | LG2 | probable mitochondrial chape  | -1.61921 | 2.36E-06 | not DE   | not DE  |
| EVM0014325 | LG2 | probable mitochondrial chape  | not DE   | not DE   | not DE   | not DE  |
| EVM0003552 | LG2 | probable plastid-lipid-assoc  | not DE   | not DE   | not DE   | not DE  |
| EVM0014481 | LG2 | probable polyamine transport  | not DE   | not DE   | not DE   | not DE  |
| EVM0016462 | LG2 | probable receptor-like prote  | not DE   | not DE   | not DE   | not DE  |
| EVM0014401 | LG2 | probable receptor-like prote  | not DE   | not DE   | not DE   | not DE  |
| EVM0020162 | LG2 | probable receptor-like prote  | not DE   | not DE   | not DE   | not DE  |
| EVM0018562 | LG2 | probable receptor-like prote  | not DE   | not DE   | not DE   | not DE  |
| EVM0003361 | LG2 | probable ribosome-binding fa  | not DE   | not DE   | not DE   | not DE  |
| EVM0011466 | LG2 | probable serine/threonine-pr  | not DE   | not DE   | not DE   | not DE  |
| EVM0004732 | LG2 | probable ubiquitin-conjugati  | not DE   | not DE   | not DE   | not DE  |
| EVM0023840 | LG2 | probable ubiquitin-like-spec  | not DE   | not DE   | not DE   | not DE  |
| EVM0006092 | LG2 | proline iminopeptidase-like   | not DE   | not DE   | not DE   | not DE  |
| EVM0016055 | LG2 | proline iminopeptidase-like   | not DE   | not DE   | not DE   | not DE  |
| EVM0009852 | LG2 | proline-rich protein 4-like   | not DE   | not DE   | not DE   | not DE  |
| EVM0007350 | LG2 | prolycopene isomerase, chlor  | not DE   | not DE   | not DE   | not DE  |
| EVM0017963 | LG2 | prolyl 4-hydroxylase subunit  | not DE   | not DE   | not DE   | not DE  |
| EVM0018120 | LG2 | proteasome subunit alpha typ  | not DE   | not DE   | not DE   | not DE  |
| EVM0001516 | LG2 | protein BASIC PENTACYSSTEINE4 | not DE   | not DE   | not DE   | not DE  |
| EVM0001266 | LG2 | protein EXECUTER 1, chloropl  | not DE   | not DE   | not DE   | not DE  |
| EVM0022615 | LG2 | protein FAM114A2-like isofor  | not DE   | not DE   | not DE   | not DE  |
| EVM0013811 | LG2 | protein FAR1-RELATED SEQUENC  | not DE   | not DE   | not DE   | not DE  |
| EVM0015080 | LG2 | protein FAR1-RELATED SEQUENC  | not DE   | not DE   | not DE   | not DE  |
| EVM0015995 | LG2 | protein RADIALIS-like 1-like  | not DE   | not DE   | not DE   | not DE  |
| EVM0019332 | LG2 | protein SHI RELATED SEQUENCE  | not DE   | not DE   | not DE   | not DE  |
| EVM0023354 | LG2 | protein SRG1-like             | not DE   | not DE   | not DE   | not DE  |
| EVM0008008 | LG2 | protein YLS9                  | not DE   | not DE   | not DE   | not DE  |
| EVM0001938 | LG2 | protein YLS9-like             | not DE   | not DE   | not DE   | not DE  |
| EVM0003539 | LG2 | protein disulfide-isomerase   | not DE   | not DE   | not DE   | not DE  |
| EVM0018593 | LG2 | purple acid phosphatase-like  | not DE   | not DE   | not DE   | not DE  |
| EVM0011885 | LG2 | putative B3 domain-containin  | not DE   | not DE   | -1.63537 | 0.01675 |
| EVM0007526 | LG2 | putative B3 domain-containin  | not DE   | not DE   | not DE   | not DE  |
| EVM0005262 | LG2 | putative cyclin-A3-1-like     | not DE   | not DE   | not DE   | not DE  |
| EVM0004968 | LG2 | putative disease resistance   | not DE   | not DE   | not DE   | not DE  |
| EVM0014670 | LG2 | putative disease resistance   | not DE   | not DE   | -1.53642 | 0.03473 |
| EVM0021406 | LG2 | putative disease resistance   | not DE   | not DE   | not DE   | not DE  |

|            |     |                                      |          |          |          |         |
|------------|-----|--------------------------------------|----------|----------|----------|---------|
| EVM0002279 | LG2 | putative disease resistance          | not DE   | not DE   | not DE   | not DE  |
| EVM0014089 | LG2 | putative disease resistance          | not DE   | not DE   | not DE   | not DE  |
| EVM0009775 | LG2 | putative disease resistance          | not DE   | not DE   | not DE   | not DE  |
| EVM0019350 | LG2 | putative leucine-rich repeat         | not DE   | not DE   | not DE   | not DE  |
| EVM0022847 | LG2 | putative leucine-rich repeat         | not DE   | not DE   | not DE   | not DE  |
| EVM0019136 | LG2 | putative pectinesterase 11-like      | not DE   | not DE   | not DE   | not DE  |
| EVM0019786 | LG2 | putative pectinesterase 11-like      | not DE   | not DE   | not DE   | not DE  |
| EVM0000120 | LG2 | putative pentatricopeptide repeat    | not DE   | not DE   | not DE   | not DE  |
| EVM0000926 | LG2 | putative pentatricopeptide repeat    | not DE   | not DE   | not DE   | not DE  |
| EVM0004749 | LG2 | putative pentatricopeptide repeat    | not DE   | not DE   | not DE   | not DE  |
| EVM0008961 | LG2 | putative pentatricopeptide repeat    | not DE   | not DE   | not DE   | not DE  |
| EVM0009639 | LG2 | putative pentatricopeptide repeat    | not DE   | not DE   | not DE   | not DE  |
| EVM0011588 | LG2 | putative pentatricopeptide repeat    | not DE   | not DE   | not DE   | not DE  |
| EVM0012250 | LG2 | putative pentatricopeptide repeat    | not DE   | not DE   | not DE   | not DE  |
| EVM0012954 | LG2 | putative pentatricopeptide repeat    | not DE   | not DE   | not DE   | not DE  |
| EVM0020886 | LG2 | putative pentatricopeptide repeat    | not DE   | not DE   | not DE   | not DE  |
| EVM0023330 | LG2 | putative pentatricopeptide repeat    | not DE   | not DE   | not DE   | not DE  |
| EVM0024268 | LG2 | putative pentatricopeptide repeat    | not DE   | not DE   | not DE   | not DE  |
| EVM0000916 | LG2 | putative rRNA methyltransferase      | not DE   | not DE   | not DE   | not DE  |
| EVM0014891 | LG2 | rab GDP dissociation inhibitor       | not DE   | not DE   | not DE   | not DE  |
| EVM0004234 | LG2 | rac-like GTP-binding protein         | not DE   | not DE   | not DE   | not DE  |
| EVM0011834 | LG2 | ras-related protein RABA2a-like      | not DE   | not DE   | not DE   | not DE  |
| EVM0001536 | LG2 | ras-related protein RABD1-like       | not DE   | not DE   | not DE   | not DE  |
| EVM0009681 | LG2 | ras-related protein Rab7             | not DE   | not DE   | not DE   | not DE  |
| EVM0023655 | LG2 | receptor protein kinase-like 2       | 0.015522 | 0.026825 | not DE   | not DE  |
| EVM0004559 | LG2 | receptor-like protein 12-like        | not DE   | not DE   | not DE   | not DE  |
| EVM0023144 | LG2 | rhodanese-like domain-containing     | not DE   | not DE   | not DE   | not DE  |
| EVM0011313 | LG2 | ribosome biogenesis protein          | not DE   | not DE   | -1.09108 | #####   |
| EVM0017059 | LG2 | root phototropism protein 3          | not DE   | not DE   | not DE   | not DE  |
| EVM0002030 | LG2 | rop guanine nucleotide exchange      | not DE   | not DE   | not DE   | not DE  |
| EVM0005247 | LG2 | scopoletin glucosyltransferase       | not DE   | not DE   | not DE   | not DE  |
| EVM0005378 | LG2 | scopoletin glucosyltransferase       | not DE   | not DE   | not DE   | not DE  |
| EVM0024009 | LG2 | separase-like isoform X2             | not DE   | not DE   | not DE   | not DE  |
| EVM0002089 | LG2 | serine hydroxymethyltransferase      | not DE   | not DE   | not DE   | not DE  |
| EVM0013029 | LG2 | serine hydroxymethyltransferase      | not DE   | not DE   | not DE   | not DE  |
| EVM0017524 | LG2 | serine/arginine-rich splicing        | not DE   | not DE   | not DE   | not DE  |
| EVM0006835 | LG2 | serine/threonine protein phosphatase | not DE   | not DE   | not DE   | not DE  |
| EVM0003906 | LG2 | serine/threonine-protein kinase      | not DE   | not DE   | -1.28694 | 0.01823 |
| EVM0017582 | LG2 | sesquiterpene synthase-like          | not DE   | not DE   | not DE   | not DE  |
| EVM0007980 | LG2 | soluble inorganic pyrophosphatase    | not DE   | not DE   | not DE   | not DE  |
| EVM0017824 | LG2 | somatic embryogenesis receptor       | not DE   | not DE   | not DE   | not DE  |
| EVM0009855 | LG2 | splicing factor 3B subunit 6         | not DE   | not DE   | not DE   | not DE  |
| EVM0011344 | LG2 | squalene monooxygenase-like          | not DE   | not DE   | not DE   | not DE  |
| EVM0002254 | LG2 | squalene synthase                    | not DE   | not DE   | not DE   | not DE  |
| EVM0002924 | LG2 | squalene synthase                    | not DE   | not DE   | not DE   | not DE  |
| EVM0010185 | LG2 | src substrate cortactin              | not DE   | not DE   | not DE   | not DE  |
| EVM0011482 | LG2 | sterol 3-beta-glucosyltransferase    | not DE   | not DE   | not DE   | not DE  |
| EVM0004075 | LG2 | stress enhanced protein 1, cytosolic | not DE   | not DE   | not DE   | not DE  |
| EVM0001042 | LG2 | subtilisin-like protease-like        | not DE   | not DE   | not DE   | not DE  |
| EVM0005681 | LG2 | subtilisin-like protease-like        | not DE   | not DE   | not DE   | not DE  |
| EVM0016584 | LG2 | subtilisin-like protease-like        | not DE   | not DE   | not DE   | not DE  |
| EVM0022752 | LG2 | subtilisin-like protease-like        | not DE   | not DE   | not DE   | not DE  |
| EVM0024515 | LG2 | subtilisin-like protease-like        | not DE   | not DE   | not DE   | not DE  |
| EVM0021054 | LG2 | syntaxin-112-like                    | not DE   | not DE   | not DE   | not DE  |

|            |     |                               |          |          |          |         |
|------------|-----|-------------------------------|----------|----------|----------|---------|
| EVM0016011 | LG2 | tRNA (guanine(10)-N2)-methyl  | 1.39634  | 0.002218 | not DE   | not DE  |
| EVM0024561 | LG2 | tRNA-dihydrouridine(47) synt  | not DE   | not DE   | not DE   | not DE  |
| EVM0016812 | LG2 | telomere repeat-binding fact  | not DE   | not DE   | not DE   | not DE  |
| EVM0022352 | LG2 | thaumatin-like protein 1-like | -1.54846 | 0.049306 | not DE   | not DE  |
| EVM0006564 | LG2 | thioredoxin M3, chloroplasti  | not DE   | not DE   | not DE   | not DE  |
| EVM0017677 | LG2 | thioredoxin domain-containin  | -1.02209 | 0.004106 | not DE   | not DE  |
| EVM0023836 | LG2 | trafficking protein particle  | not DE   | not DE   | not DE   | not DE  |
| EVM0011981 | LG2 | transcription factor ABORTED  | not DE   | not DE   | not DE   | not DE  |
| EVM0014204 | LG2 | transcription factor MYB44-l  | not DE   | not DE   | not DE   | not DE  |
| EVM0007035 | LG2 | transcription factor TFIIIB   | not DE   | not DE   | -1.16423 | 0.00021 |
| EVM0014039 | LG2 | transcription factor TFIIIB   | not DE   | not DE   | not DE   | not DE  |
| EVM0002548 | LG2 | transcription factor TFIIIB   | not DE   | not DE   | not DE   | not DE  |
| EVM0020475 | LG2 | transcription factor bHLH113  | not DE   | not DE   | not DE   | not DE  |
| EVM0001350 | LG2 | transcription factor bHLH18-  | not DE   | not DE   | not DE   | not DE  |
| EVM0014207 | LG2 | transcription factor bHLH85-  | not DE   | not DE   | not DE   | not DE  |
| EVM0015611 | LG2 | transcription factor bHLH95-  | not DE   | not DE   | not DE   | not DE  |
| EVM0001754 | LG2 | transcriptional regulator AT  | not DE   | not DE   | not DE   | not DE  |
| EVM0020900 | LG2 | transcriptional regulator AT  | not DE   | not DE   | not DE   | not DE  |
| EVM0020503 | LG2 | translocase of chloroplast l  | not DE   | not DE   | not DE   | not DE  |
| EVM0006941 | LG2 | translocation protein SEC63   | not DE   | not DE   | not DE   | not DE  |
| EVM0005024 | LG2 | translocon-associated protei  | not DE   | not DE   | not DE   | not DE  |
| EVM0021481 | LG2 | transmembrane protein 87A-li  | not DE   | not DE   | not DE   | not DE  |
| EVM0001747 | LG2 | transposon Ty3-G Gag-Pol pol  | not DE   | not DE   | not DE   | not DE  |
| EVM0022205 | LG2 | trichohyalin-like             | not DE   | not DE   | not DE   | not DE  |
| EVM0003462 | LG2 | tyrosine-sulfated glycopepti  | not DE   | not DE   | not DE   | not DE  |
| EVM0002362 | LG2 | ubiquitin domain-containing   | not DE   | not DE   | not DE   | not DE  |
| EVM0010420 | LG2 | ubiquitin fusion degradation  | not DE   | not DE   | not DE   | not DE  |
| EVM0013172 | LG2 | uncharacterized protein Atlg  | not DE   | not DE   | not DE   | not DE  |
| EVM0014848 | LG2 | uncharacterized protein Atlg  | not DE   | not DE   | not DE   | not DE  |
| EVM0000615 | LG2 | uncharacterized protein At2g  | not DE   | not DE   | not DE   | not DE  |
| EVM0001311 | LG2 | uncharacterized protein At2g  | not DE   | not DE   | not DE   | not DE  |
| EVM0002509 | LG2 | uncharacterized protein At3g  | not DE   | not DE   | not DE   | not DE  |
| EVM0022699 | LG2 | uncharacterized protein At3g  | not DE   | not DE   | not DE   | not DE  |
| EVM0022970 | LG2 | uncharacterized protein At3g  | not DE   | not DE   | not DE   | not DE  |
| EVM0023000 | LG2 | uncharacterized protein At4g  | not DE   | not DE   | not DE   | not DE  |
| EVM0020235 | LG2 | uncharacterized protein C57A  | not DE   | not DE   | not DE   | not DE  |
| EVM0003292 | LG2 | uncharacterized protein LOC1  | not DE   | not DE   | not DE   | not DE  |
| EVM0011731 | LG2 | uncharacterized protein LOC1  | not DE   | not DE   | not DE   | not DE  |
| EVM0000409 | LG2 | uncharacterized protein LOC1  | not DE   | not DE   | not DE   | not DE  |
| EVM0021897 | LG2 | uncharacterized protein LOC1  | not DE   | not DE   | not DE   | not DE  |
| EVM0021738 | LG2 | uncharacterized protein LOC1  | not DE   | not DE   | not DE   | not DE  |
| EVM0005496 | LG2 | uncharacterized protein LOC1  | not DE   | not DE   | not DE   | not DE  |
| EVM0017442 | LG2 | uncharacterized protein LOC1  | not DE   | not DE   | not DE   | not DE  |
| EVM0011397 | LG2 | uncharacterized protein LOC1  | not DE   | not DE   | not DE   | not DE  |
| EVM0000027 | LG2 | uncharacterized protein LOC1  | not DE   | not DE   | not DE   | not DE  |
| EVM0002337 | LG2 | uncharacterized protein LOC1  | not DE   | not DE   | not DE   | not DE  |
| EVM0007106 | LG2 | uncharacterized protein LOC1  | not DE   | not DE   | not DE   | not DE  |
| EVM0022488 | LG2 | uncharacterized protein LOC1  | not DE   | not DE   | not DE   | not DE  |
| EVM0011843 | LG2 | uncharacterized protein LOC1  | not DE   | not DE   | not DE   | not DE  |
| EVM0003011 | LG2 | uncharacterized protein LOC1  | not DE   | not DE   | not DE   | not DE  |
| EVM0007052 | LG2 | uncharacterized protein LOC1  | not DE   | not DE   | not DE   | not DE  |
| EVM0004719 | LG2 | uncharacterized protein LOC1  | not DE   | not DE   | not DE   | not DE  |
| EVM0018070 | LG2 | uncharacterized protein LOC1  | not DE   | not DE   | not DE   | not DE  |
| EVM0023556 | LG2 | uncharacterized protein LOC1  | not DE   | not DE   | not DE   | not DE  |



|            |     |                              |          |          |          |         |
|------------|-----|------------------------------|----------|----------|----------|---------|
| EVM0004346 | LG2 | uncharacterized protein LOC1 | not DE   | not DE   | not DE   | not DE  |
| EVM0008166 | LG2 | uncharacterized protein LOC1 | not DE   | not DE   | not DE   | not DE  |
| EVM0008280 | LG2 | uncharacterized protein LOC1 | not DE   | not DE   | not DE   | not DE  |
| EVM0012623 | LG2 | uncharacterized protein LOC1 | not DE   | not DE   | not DE   | not DE  |
| EVM0024161 | LG2 | uncharacterized protein LOC1 | not DE   | not DE   | not DE   | not DE  |
| EVM0007891 | LG2 | uncharacterized protein LOC1 | not DE   | not DE   | not DE   | not DE  |
| EVM0020515 | LG2 | uncharacterized protein LOC1 | not DE   | not DE   | not DE   | not DE  |
| EVM0010062 | LG2 | uncharacterized protein LOC1 | not DE   | not DE   | not DE   | not DE  |
| EVM0002427 | LG2 | uncharacterized protein LOC1 | not DE   | not DE   | not DE   | not DE  |
| EVM0007547 | LG2 | uncharacterized protein LOC1 | not DE   | not DE   | not DE   | not DE  |
| EVM0011902 | LG2 | uncharacterized protein LOC1 | not DE   | not DE   | not DE   | not DE  |
| EVM0018783 | LG2 | uncharacterized protein LOC1 | not DE   | not DE   | not DE   | not DE  |
| EVM0021323 | LG2 | uncharacterized protein LOC1 | not DE   | not DE   | not DE   | not DE  |
| EVM0004415 | LG2 | uncharacterized protein LOC1 | not DE   | not DE   | not DE   | not DE  |
| EVM0007504 | LG2 | uncharacterized protein LOC1 | not DE   | not DE   | not DE   | not DE  |
| EVM0012428 | LG2 | uncharacterized protein LOC1 | not DE   | not DE   | not DE   | not DE  |
| EVM0010759 | LG2 | uncharacterized protein LOC1 | 1.595683 | 0.01649  | not DE   | not DE  |
| EVM0017188 | LG2 | uncharacterized protein LOC1 | not DE   | not DE   | not DE   | not DE  |
| EVM0019669 | LG2 | uncharacterized protein LOC1 | not DE   | not DE   | not DE   | not DE  |
| EVM0015694 | LG2 | uncharacterized protein LOC1 | not DE   | not DE   | not DE   | not DE  |
| EVM0008149 | LG2 | uncharacterized protein LOC1 | not DE   | not DE   | not DE   | not DE  |
| EVM0004367 | LG2 | uncharacterized protein LOC1 | not DE   | not DE   | not DE   | not DE  |
| EVM0007633 | LG2 | uncharacterized protein LOC1 | not DE   | not DE   | not DE   | not DE  |
| EVM0009052 | LG2 | uncharacterized protein LOC1 | not DE   | not DE   | 1.000725 | 0.00019 |
| EVM0022965 | LG2 | uncharacterized protein LOC1 | not DE   | not DE   | -1.53254 | #####   |
| EVM0014211 | LG2 | uncharacterized protein LOC1 | -1.17144 | 0.042339 | not DE   | not DE  |
| EVM0002569 | LG2 | uncharacterized protein LOC1 | not DE   | not DE   | not DE   | not DE  |
| EVM0005623 | LG2 | uncharacterized protein LOC1 | not DE   | not DE   | not DE   | not DE  |
| EVM0002622 | LG2 | uncharacterized protein LOC1 | not DE   | not DE   | not DE   | not DE  |
| EVM0016390 | LG2 | uncharacterized protein LOC1 | not DE   | not DE   | not DE   | not DE  |
| EVM0010592 | LG2 | uncharacterized protein LOC1 | not DE   | not DE   | not DE   | not DE  |
| EVM0024302 | LG2 | uncharacterized protein LOC1 | not DE   | not DE   | not DE   | not DE  |
| EVM0020342 | LG2 | uncharacterized protein LOC1 | not DE   | not DE   | 1.046895 | 0.00017 |
| EVM0004853 | LG2 | uncharacterized protein LOC1 | not DE   | not DE   | -1.31828 | 0.00047 |
| EVM0001824 | LG2 | uncharacterized protein LOC1 | not DE   | not DE   | not DE   | not DE  |
| EVM0006857 | LG2 | uncharacterized protein LOC1 | not DE   | not DE   | not DE   | not DE  |
| EVM0007909 | LG2 | uncharacterized protein LOC1 | not DE   | not DE   | not DE   | not DE  |
| EVM0015755 | LG2 | uncharacterized protein LOC1 | not DE   | not DE   | not DE   | not DE  |
| EVM0021066 | LG2 | uncharacterized protein LOC1 | not DE   | not DE   | not DE   | not DE  |
| EVM0002629 | LG2 | uncharacterized protein LOC1 | not DE   | not DE   | not DE   | not DE  |
| EVM0011268 | LG2 | uncharacterized protein LOC1 | not DE   | not DE   | not DE   | not DE  |
| EVM0024233 | LG2 | uncharacterized protein LOC1 | not DE   | not DE   | not DE   | not DE  |
| EVM0009525 | LG2 | uncharacterized protein LOC1 | not DE   | not DE   | not DE   | not DE  |
| EVM0016963 | LG2 | uncharacterized protein LOC1 | not DE   | not DE   | not DE   | not DE  |
| EVM0005318 | LG2 | uncharacterized protein LOC1 | not DE   | not DE   | not DE   | not DE  |
| EVM0010672 | LG2 | uncharacterized protein LOC1 | not DE   | not DE   | not DE   | not DE  |
| EVM0010788 | LG2 | uncharacterized protein LOC1 | -1.88476 | 1.03E-09 | not DE   | not DE  |
| EVM0022478 | LG2 | uncharacterized protein LOC1 | not DE   | not DE   | not DE   | not DE  |
| EVM0023913 | LG2 | uncharacterized protein LOC1 | not DE   | not DE   | not DE   | not DE  |
| EVM0018090 | LG2 | uncharacterized protein LOC1 | not DE   | not DE   | not DE   | not DE  |
| EVM0011457 | LG2 | uncharacterized protein LOC1 | not DE   | not DE   | not DE   | not DE  |
| EVM0014324 | LG2 | uncharacterized protein LOC1 | not DE   | not DE   | not DE   | not DE  |
| EVM0006215 | LG2 | uncharacterized protein LOC1 | not DE   | not DE   | not DE   | not DE  |
| EVM0007605 | LG2 | uncharacterized protein LOC1 | not DE   | not DE   | not DE   | not DE  |

|            |     |                              |          |          |          |         |
|------------|-----|------------------------------|----------|----------|----------|---------|
| EVM0014330 | LG2 | uncharacterized protein LOC1 | not DE   | not DE   | 1.050897 | 0.00012 |
| EVM0014718 | LG2 | uncharacterized protein LOC1 | not DE   | not DE   | not DE   | not DE  |
| EVM0015095 | LG2 | uncharacterized protein LOC1 | not DE   | not DE   | not DE   | not DE  |
| EVM0002919 | LG2 | uncharacterized protein LOC1 | not DE   | not DE   | not DE   | not DE  |
| EVM0019448 | LG2 | uncharacterized protein LOC1 | not DE   | not DE   | not DE   | not DE  |
| EVM0005802 | LG2 | uncharacterized protein LOC1 | not DE   | not DE   | not DE   | not DE  |
| EVM0024632 | LG2 | uncharacterized protein LOC1 | not DE   | not DE   | not DE   | not DE  |
| EVM0003183 | LG2 | uncharacterized protein LOC1 | not DE   | not DE   | not DE   | not DE  |
| EVM0016675 | LG2 | uncharacterized protein LOC1 | not DE   | not DE   | not DE   | not DE  |
| EVM0001344 | LG2 | uncharacterized protein LOC1 | not DE   | not DE   | not DE   | not DE  |
| EVM0021166 | LG2 | uncharacterized protein LOC1 | not DE   | not DE   | not DE   | not DE  |
| EVM0015634 | LG2 | uncharacterized protein LOC1 | not DE   | not DE   | not DE   | not DE  |
| EVM0002034 | LG2 | uncharacterized protein LOC1 | -1.19923 | 0.019348 | 1.204389 | 0.02557 |
| EVM0022773 | LG2 | uncharacterized protein LOC1 | not DE   | not DE   | not DE   | not DE  |
| EVM0010885 | LG2 | uncharacterized protein LOC1 | not DE   | not DE   | 1.682069 | 0.04134 |
| EVM0022698 | LG2 | uncharacterized protein LOC1 | not DE   | not DE   | not DE   | not DE  |
| EVM0002296 | LG2 | uncharacterized protein LOC1 | not DE   | not DE   | not DE   | not DE  |
| EVM0012991 | LG2 | uncharacterized protein LOC1 | not DE   | not DE   | not DE   | not DE  |
| EVM0014494 | LG2 | uncharacterized protein LOC1 | not DE   | not DE   | not DE   | not DE  |
| EVM0005763 | LG2 | uncharacterized protein LOC1 | not DE   | not DE   | not DE   | not DE  |
| EVM0006732 | LG2 | uncharacterized protein LOC1 | not DE   | not DE   | not DE   | not DE  |
| EVM0022514 | LG2 | uncharacterized protein LOC1 | 1.035504 | 0.000464 | not DE   | not DE  |
| EVM0002610 | LG2 | uncharacterized protein LOC1 | not DE   | not DE   | not DE   | not DE  |
| EVM0013133 | LG2 | uncharacterized protein LOC1 | not DE   | not DE   | not DE   | not DE  |
| EVM0021920 | LG2 | uncharacterized protein LOC1 | not DE   | not DE   | not DE   | not DE  |
| EVM0002663 | LG2 | uncharacterized protein LOC1 | not DE   | not DE   | not DE   | not DE  |
| EVM0021408 | LG2 | uncharacterized protein LOC1 | not DE   | not DE   | not DE   | not DE  |
| EVM0013443 | LG2 | uncharacterized protein LOC1 | not DE   | not DE   | not DE   | not DE  |
| EVM0020004 | LG2 | uncharacterized protein LOC1 | not DE   | not DE   | not DE   | not DE  |
| EVM0008991 | LG2 | uncharacterized protein LOC1 | not DE   | not DE   | not DE   | not DE  |
| EVM0006222 | LG2 | uncharacterized protein LOC1 | not DE   | not DE   | not DE   | not DE  |
| EVM0023564 | LG2 | uncharacterized protein LOC1 | not DE   | not DE   | not DE   | not DE  |
| EVM0016758 | LG2 | uncharacterized protein LOC1 | not DE   | not DE   | not DE   | not DE  |
| EVM0000907 | LG2 | uncharacterized protein LOC1 | not DE   | not DE   | not DE   | not DE  |
| EVM0003716 | LG2 | uncharacterized protein LOC1 | not DE   | not DE   | not DE   | not DE  |
| EVM0024251 | LG2 | uncharacterized protein LOC1 | not DE   | not DE   | not DE   | not DE  |
| EVM0007855 | LG2 | uncharacterized protein LOC1 | not DE   | not DE   | not DE   | not DE  |
| EVM0023510 | LG2 | uncharacterized protein LOC1 | not DE   | not DE   | not DE   | not DE  |
| EVM0013508 | LG2 | uncharacterized protein LOC1 | not DE   | not DE   | not DE   | not DE  |
| EVM0020961 | LG2 | uncharacterized protein LOC1 | not DE   | not DE   | not DE   | not DE  |
| EVM0008713 | LG2 | uncharacterized protein LOC1 | not DE   | not DE   | not DE   | not DE  |
| EVM0015162 | LG2 | uncharacterized protein LOC1 | not DE   | not DE   | not DE   | not DE  |
| EVM0006811 | LG2 | uncharacterized protein ycf3 | -1.23165 | 0.000184 | not DE   | not DE  |
| EVM0001707 | LG2 | uncharacterized zinc finger  | not DE   | not DE   | not DE   | not DE  |
| EVM0000862 | LG2 | vacuolar-sorting receptor 3- | not DE   | not DE   | not DE   | not DE  |
| EVM0021155 | LG2 | wall-associated receptor kin | not DE   | not DE   | not DE   | not DE  |
| EVM0000166 | LG2 | wall-associated receptor kin | not DE   | not DE   | not DE   | not DE  |
| EVM0006375 | LG2 | wall-associated receptor kin | not DE   | not DE   | not DE   | not DE  |
| EVM0010197 | LG2 | wall-associated receptor kin | not DE   | not DE   | not DE   | not DE  |
| EVM0015723 | LG2 | wall-associated receptor kin | not DE   | not DE   | not DE   | not DE  |
| EVM0017152 | LG2 | wall-associated receptor kin | not DE   | not DE   | not DE   | not DE  |
| EVM0020476 | LG2 | wall-associated receptor kin | not DE   | not DE   | not DE   | not DE  |
| EVM0009528 | LG2 | wall-associated receptor kin | not DE   | not DE   | 1.151276 | 0.01887 |
| EVM0009632 | LG2 | zinc finger CCCH domain-cont | not DE   | not DE   | not DE   | not DE  |

|            |     |                               |          |          |          |         |
|------------|-----|-------------------------------|----------|----------|----------|---------|
| EVM0020274 | LG2 | zinc finger CCCH domain-cont  | not DE   | not DE   | not DE   | not DE  |
| EVM0000073 | LG2 | zinc finger CCCH domain-cont  | not DE   | not DE   | not DE   | not DE  |
| EVM0022249 | LG2 | zinc finger CCCH domain-cont  | not DE   | not DE   | not DE   | not DE  |
| EVM0003533 | LG2 | zinc finger CCCH domain-cont  | not DE   | not DE   | not DE   | not DE  |
| EVM0005206 | LG2 | zinc finger CCCH domain-cont  | not DE   | not DE   | not DE   | not DE  |
| EVM0019355 | LG2 | zinc finger CCCH domain-cont  | not DE   | not DE   | not DE   | not DE  |
| EVM0004490 | LG2 | zinc finger protein KNUCKLES  | not DE   | not DE   | not DE   | not DE  |
| EVM0021871 | LG2 | zinc finger protein ZAT3-lik  | not DE   | not DE   | not DE   | not DE  |
| EVM0007959 | LG2 | zinc finger protein-like 1 h  | not DE   | not DE   | not DE   | not DE  |
| EVM0005238 | LG2 | zinc-finger homeodomain prot  | not DE   | not DE   | not DE   | not DE  |
| EVM0014491 | LG2 | 2-oxoglutarate and Fe(II)-dep | 4.134141 | 5.03E-05 | 1.68765  | 0.02897 |
| EVM0006253 | LG2 | 26S proteasome non-ATPase reg | not DE   | not DE   | not DE   | not DE  |
| EVM0009391 | LG2 | 3-deoxy-d-arabino-heptuloson  | not DE   | not DE   | -1.05502 | 0.00392 |
| EVM0014826 | LG2 | 3-hydroxy-3-methylglutaryl co | not DE   | not DE   | not DE   | not DE  |
| EVM0000642 | LG2 | 30S ribosomal protein S31     | not DE   | not DE   | not DE   | not DE  |
| EVM0000646 | LG2 | 4-hydroxyphenylacetaldehyde c | not DE   | not DE   | not DE   | not DE  |
| EVM0023936 | LG2 | 40S ribosomal S6              | not DE   | not DE   | not DE   | not DE  |
| EVM0020305 | LG2 | 40S ribosomal protein S16A    | not DE   | not DE   | not DE   | not DE  |
| EVM0020598 | LG2 | AT-hook DNA-binding family pr | not DE   | not DE   | not DE   | not DE  |
| EVM0000763 | LG2 | ATP binding protein, putative | not DE   | not DE   | not DE   | not DE  |
| EVM0001349 | LG2 | ATP binding protein, putative | not DE   | not DE   | not DE   | not DE  |
| EVM0020005 | LG2 | ATP binding protein, putative | not DE   | not DE   | not DE   | not DE  |
| EVM0019508 | LG2 | ATP-dependent Clp protease pr | not DE   | not DE   | not DE   | not DE  |
| EVM0015859 | LG2 | ATP-dependent Clp protease pr | not DE   | not DE   | not DE   | not DE  |
| EVM0014619 | LG2 | Abscisic acid &#x2013;hydroxy | not DE   | not DE   | not DE   | not DE  |
| EVM0004483 | LG2 | Actin-depolymerizing factor 5 | not DE   | not DE   | not DE   | not DE  |
| EVM0009818 | LG2 | Agamous 57                    | not DE   | not DE   | not DE   | not DE  |
| EVM0004294 | LG2 | Alpha/beta-Hydrolases superfa | not DE   | not DE   | not DE   | not DE  |
| EVM0013700 | LG2 | Armadillo repeat only 1       | not DE   | not DE   | not DE   | not DE  |
| EVM0009770 | LG2 | Ataurora3                     | not DE   | not DE   | not DE   | not DE  |
| EVM0011610 | LG2 | Basic helix-loop-helix DNA-bi | not DE   | not DE   | not DE   | not DE  |
| EVM0017280 | LG2 | Basic-leucine zipper transcri | not DE   | not DE   | not DE   | not DE  |
| EVM0005235 | LG2 | Beta-ureidopropionase         | not DE   | not DE   | not DE   | not DE  |
| EVM0001950 | LG2 | CD2-binding protein-related,  | not DE   | not DE   | not DE   | not DE  |
| EVM0007834 | LG2 | CP2                           | not DE   | not DE   | not DE   | not DE  |
| EVM0008842 | LG2 | Catalytic, putative           | not DE   | not DE   | not DE   | not DE  |
| EVM0010425 | LG2 | Catalytic, putative           | not DE   | not DE   | not DE   | not DE  |
| EVM0011492 | LG2 | Chaperone protein dnaJ 11, ch | not DE   | not DE   | -4.43659 | #####   |
| EVM0017902 | LG2 | Chloroplast-targeted copper c | not DE   | not DE   | not DE   | not DE  |
| EVM0010429 | LG2 | Cold acclimation protein WCOR | 2.101084 | 0.00043  | 1.280157 | 0.01357 |
| EVM0017699 | LG2 | Cryptochrome-interacting basi | not DE   | not DE   | not DE   | not DE  |
| EVM0020870 | LG2 | Cyclase family protein isofor | not DE   | not DE   | not DE   | not DE  |
| EVM0010337 | LG2 | Cytochrome P450               | not DE   | not DE   | not DE   | not DE  |
| EVM0023520 | LG2 | Cytochrome P450, putative     | not DE   | not DE   | not DE   | not DE  |
| EVM0022590 | LG2 | DNA binding protein, putative | not DE   | not DE   | not DE   | not DE  |
| EVM0019434 | LG2 | DNA binding protein, putative | not DE   | not DE   | not DE   | not DE  |
| EVM0001644 | LG2 | DNA binding protein, putative | not DE   | not DE   | not DE   | not DE  |
| EVM0016316 | LG2 | DNA binding protein, putative | not DE   | not DE   | not DE   | not DE  |
| EVM0006905 | LG2 | DNA-directed RNA polymerase I | not DE   | not DE   | not DE   | not DE  |
| EVM0009571 | LG2 | Disease resistance-responsive | not DE   | not DE   | not DE   | not DE  |
| EVM0008779 | LG2 | E3 ubiquitin-protein ligase R | not DE   | not DE   | not DE   | not DE  |
| EVM0006896 | LG2 | Emb:CAB89363.1                | not DE   | not DE   | not DE   | not DE  |
| EVM0020067 | LG2 | Endonuclease or glycosyl hydr | not DE   | not DE   | not DE   | not DE  |
| EVM0020509 | LG2 | Endoplasmic reticulum vesicle | not DE   | not DE   | not DE   | not DE  |

|            |     |                                                   |          |          |          |         |
|------------|-----|---------------------------------------------------|----------|----------|----------|---------|
| EVM0006257 | LG2 | Eukaryotic translation initiation factor 4E       | not DE   | not DE   | not DE   | not DE  |
| EVM0017232 | LG2 | Eukaryotic translation initiation factor 4E       | not DE   | not DE   | not DE   | not DE  |
| EVM0008084 | LG2 | Exostosin family protein                          | not DE   | not DE   | not DE   | not DE  |
| EVM0012153 | LG2 | F1504.13                                          | not DE   | not DE   | not DE   | not DE  |
| EVM0019295 | LG2 | Ferric reduction oxidase 7 isoform 1              | -1.99108 | 0.033333 | not DE   | not DE  |
| EVM0022132 | LG2 | Ferric reduction oxidase 7 isoform 2              | not DE   | not DE   | not DE   | not DE  |
| EVM0020260 | LG2 | Fucosyltransferase 12 isoform 1                   | not DE   | not DE   | not DE   | not DE  |
| EVM0002652 | LG2 | GATA type zinc finger transcription factor 1      | not DE   | not DE   | not DE   | not DE  |
| EVM0006517 | LG2 | GH3                                               | not DE   | not DE   | not DE   | not DE  |
| EVM0024203 | LG2 | Galactosyltransferase family 12 member 1          | not DE   | not DE   | not DE   | not DE  |
| EVM0015394 | LG2 | Glycine-rich RNA-binding GRP1                     | 1.295904 | 5.88E-08 | 1.311045 | #####   |
| EVM0016493 | LG2 | Glycine-rich RNA-binding GRP1                     | 1.837722 | 0.0008   | 1.615481 | 0.00055 |
| EVM0023066 | LG2 | Glycine-rich protein 2b                           | not DE   | not DE   | not DE   | not DE  |
| EVM0002578 | LG2 | Glycosyl hydrolases family 32 member 1            | not DE   | not DE   | not DE   | not DE  |
| EVM0010317 | LG2 | HSP40/DnaJ peptide-binding protein 1              | not DE   | not DE   | not DE   | not DE  |
| EVM0021076 | LG2 | HVA22 A, putative isoform 2                       | not DE   | not DE   | not DE   | not DE  |
| EVM0004129 | LG2 | Hemoglobin-2                                      | 6.248723 | 0.003286 | not DE   | not DE  |
| EVM0013779 | LG2 | Homeobox protein 31                               | not DE   | not DE   | not DE   | not DE  |
| EVM0018324 | LG2 | Homeobox protein 31                               | not DE   | not DE   | not DE   | not DE  |
| EVM0008195 | LG2 | Homoserine O-acetyltransferase 1                  | not DE   | not DE   | 1.194334 | #####   |
| EVM0007799 | LG2 | Indole-3-acetic acid-induced protein 1            | -1.79514 | 2.32E-05 | not DE   | not DE  |
| EVM0000955 | LG2 | Jasmonate-zim-domain protein 1                    | not DE   | not DE   | not DE   | not DE  |
| EVM0024245 | LG2 | Kinase APK1B, chloroplast, putative               | not DE   | not DE   | not DE   | not DE  |
| EVM0021485 | LG2 | Laccase 17                                        | not DE   | not DE   | not DE   | not DE  |
| EVM0012276 | LG2 | Late embryogenesis abundant protein 1             | not DE   | not DE   | not DE   | not DE  |
| EVM0007689 | LG2 | Leucine-rich repeat family protein 1              | not DE   | not DE   | not DE   | not DE  |
| EVM0005571 | LG2 | Leucine-rich repeat protein kinase 1              | not DE   | not DE   | not DE   | not DE  |
| EVM0017499 | LG2 | Magnesium transporter CorA-like protein 1         | not DE   | not DE   | not DE   | not DE  |
| EVM0012127 | LG2 | Magnesium transporter NIPA2                       | not DE   | not DE   | not DE   | not DE  |
| EVM0006856 | LG2 | Metacaspase 9                                     | not DE   | not DE   | not DE   | not DE  |
| EVM0008570 | LG2 | Metacaspase 9                                     | not DE   | not DE   | not DE   | not DE  |
| EVM0013821 | LG2 | Metacaspase 9                                     | not DE   | not DE   | not DE   | not DE  |
| EVM0018427 | LG2 | Metacaspase 9                                     | not DE   | not DE   | not DE   | not DE  |
| EVM0003625 | LG2 | Methylcrotonyl-CoA carboxylase 1                  | not DE   | not DE   | not DE   | not DE  |
| EVM0006212 | LG2 | Methylcrotonyl-CoA carboxylase 1                  | not DE   | not DE   | not DE   | not DE  |
| EVM0011690 | LG2 | Minor allergen Alt a, putative                    | not DE   | not DE   | not DE   | not DE  |
| EVM0022482 | LG2 | NAC domain containing protein 1                   | -1.2589  | 0.030455 | not DE   | not DE  |
| EVM0012952 | LG2 | NAD(P)-linked oxidoreductase 1                    | not DE   | not DE   | not DE   | not DE  |
| EVM0023480 | LG2 | Nicotinamidase 1 isoform 1                        | not DE   | not DE   | not DE   | not DE  |
| EVM0008244 | LG2 | NmrA-like negative transcription factor 1         | not DE   | not DE   | not DE   | not DE  |
| EVM0012663 | LG2 | Nodulation receptor kinase protein 1              | not DE   | not DE   | not DE   | not DE  |
| EVM0024370 | LG2 | Nodulation receptor kinase protein 1              | not DE   | not DE   | not DE   | not DE  |
| EVM0007692 | LG2 | Nucleotide-diphospho-sugar transferase 1          | not DE   | not DE   | not DE   | not DE  |
| EVM0013976 | LG2 | OPEN STOMATA 1 family protein 1                   | not DE   | not DE   | not DE   | not DE  |
| EVM0005384 | LG2 | Oxidoreductase, putative                          | not DE   | not DE   | not DE   | not DE  |
| EVM0011064 | LG2 | Oxidoreductase, putative                          | not DE   | not DE   | not DE   | not DE  |
| EVM0009404 | LG2 | P-loop containing nucleoside diphosphate kinase 1 | not DE   | not DE   | not DE   | not DE  |
| EVM0007367 | LG2 | PHD finger family protein 1                       | not DE   | not DE   | not DE   | not DE  |
| EVM0013782 | LG2 | PHD finger family protein / bHLH domain protein 1 | not DE   | not DE   | not DE   | not DE  |
| EVM0002858 | LG2 | Pentatricopeptide repeat (PPR) domain protein 1   | not DE   | not DE   | not DE   | not DE  |
| EVM0001509 | LG2 | Pentatricopeptide repeat-containing protein 1     | not DE   | not DE   | not DE   | not DE  |
| EVM0023027 | LG2 | Pentatricopeptide repeat-containing protein 1     | not DE   | not DE   | not DE   | not DE  |
| EVM0002059 | LG2 | Phospholipase D                                   | not DE   | not DE   | not DE   | not DE  |
| EVM0004348 | LG2 | Phospholipase D                                   | not DE   | not DE   | not DE   | not DE  |

|            |     |                                |          |          |          |         |
|------------|-----|--------------------------------|----------|----------|----------|---------|
| EVM0011707 | LG2 | Phox-associated domain, Phox-1 | not DE   | not DE   | not DE   | not DE  |
| EVM0017843 | LG2 | Progesterone 5-beta-reductase  | not DE   | not DE   | not DE   | not DE  |
| EVM0020106 | LG2 | Protein ROS1 -like protein     | not DE   | not DE   | not DE   | not DE  |
| EVM0004338 | LG2 | Pseudouridine synthase family  | not DE   | not DE   | not DE   | not DE  |
| EVM0019225 | LG2 | R2R3-MYB                       | -2.10618 | 1.55E-08 | not DE   | not DE  |
| EVM0013303 | LG2 | RS-norcoclaurine 6-O-methyltr  | -8.00693 | 2.03E-10 | not DE   | not DE  |
| EVM0018684 | LG2 | RS-norcoclaurine 6-O-methyltr  | not DE   | not DE   | not DE   | not DE  |
| EVM0022059 | LG2 | RUB1 conjugating enzyme 1 iso  | not DE   | not DE   | not DE   | not DE  |
| EVM0001139 | LG2 | RecName: Full=Caffeoyl-CoA O-  | not DE   | not DE   | not DE   | not DE  |
| EVM0015071 | LG2 | RecName: Full=Caffeoyl-CoA O-  | not DE   | not DE   | not DE   | not DE  |
| EVM0015123 | LG2 | RecName: Full=Defensin-like p  | not DE   | not DE   | not DE   | not DE  |
| EVM0017053 | LG2 | RecName: Full=Probable U6 snR  | not DE   | not DE   | not DE   | not DE  |
| EVM0013402 | LG2 | Ribosomal protein L10 family   | not DE   | not DE   | not DE   | not DE  |
| EVM0004577 | LG2 | SAUR family protein            | not DE   | not DE   | not DE   | not DE  |
| EVM0001829 | LG2 | SAUR-like auxin-responsive pr  | not DE   | not DE   | not DE   | not DE  |
| EVM0005088 | LG2 | SAUR-like auxin-responsive pr  | not DE   | not DE   | not DE   | not DE  |
| EVM0006486 | LG2 | SAUR-like auxin-responsive pr  | not DE   | not DE   | not DE   | not DE  |
| EVM0019366 | LG2 | SAUR-like auxin-responsive pr  | not DE   | not DE   | not DE   | not DE  |
| EVM0021980 | LG2 | SAUR-like auxin-responsive pr  | not DE   | not DE   | not DE   | not DE  |
| EVM0024412 | LG2 | SAUR-like auxin-responsive pr  | not DE   | not DE   | not DE   | not DE  |
| EVM0009118 | LG2 | SEC7-like guanine nucleotide   | not DE   | not DE   | -1.08987 | 0.00039 |
| EVM0019649 | LG2 | SWIB complex BAF60b domain-co  | not DE   | not DE   | not DE   | not DE  |
| EVM0016838 | LG2 | Sec14p-like phosphatidylinosi  | not DE   | not DE   | not DE   | not DE  |
| EVM0007456 | LG2 | Sequence-specific DNA binding  | not DE   | not DE   | not DE   | not DE  |
| EVM0010126 | LG2 | Serine/arginine-rich splicing  | not DE   | not DE   | not DE   | not DE  |
| EVM0018269 | LG2 | Snakin-1                       | not DE   | not DE   | not DE   | not DE  |
| EVM0000071 | LG2 | Sulfate transporter 1,3 isofo  | not DE   | not DE   | not DE   | not DE  |
| EVM0001766 | LG2 | TCP family transcription fact  | not DE   | not DE   | not DE   | not DE  |
| EVM0018842 | LG2 | TRNA delta(2)-isopentenylpyro  | not DE   | not DE   | not DE   | not DE  |
| EVM0001735 | LG2 | Translocon at the outer membr  | not DE   | not DE   | not DE   | not DE  |
| EVM0022184 | LG2 | Transportin 1 isoform 1        | not DE   | not DE   | not DE   | not DE  |
| EVM0003971 | LG2 | Triosephosphate isomerase iso  | not DE   | not DE   | not DE   | not DE  |
| EVM0015679 | LG2 | UDP-Glycosyltransferase super  | not DE   | not DE   | not DE   | not DE  |
| EVM0022510 | LG2 | UDP-glycosyltransferase 3      | not DE   | not DE   | not DE   | not DE  |
| EVM0023885 | LG2 | UDP-glycosyltransferase 3      | not DE   | not DE   | not DE   | not DE  |
| EVM0014265 | LG2 | UDP-glycosyltransferase 73B4,  | not DE   | not DE   | not DE   | not DE  |
| EVM0019245 | LG2 | UDP-glycosyltransferase 73B4,  | not DE   | not DE   | not DE   | not DE  |
| EVM0010824 | LG2 | UNC-50 family protein isoform  | not DE   | not DE   | not DE   | not DE  |
| EVM0019311 | LG2 | Ubiquitin family protein       | not DE   | not DE   | not DE   | not DE  |
| EVM0020188 | LG2 | Ubiquitin family protein       | not DE   | not DE   | not DE   | not DE  |
| EVM0002219 | LG2 | Uncharacterized protein TCM_C  | not DE   | not DE   | not DE   | not DE  |
| EVM0021060 | LG2 | Uncharacterized protein TCM_C  | not DE   | not DE   | not DE   | not DE  |
| EVM0012026 | LG2 | Uncharacterized protein TCM_C  | not DE   | not DE   | not DE   | not DE  |
| EVM0005509 | LG2 | Uncharacterized protein TCM_C  | not DE   | not DE   | not DE   | not DE  |
| EVM0011861 | LG2 | Uncharacterized protein TCM_C  | not DE   | not DE   | not DE   | not DE  |
| EVM0011661 | LG2 | Uncharacterized protein TCM_C  | not DE   | not DE   | not DE   | not DE  |
| EVM0017749 | LG2 | Uncharacterized protein TCM_C  | not DE   | not DE   | not DE   | not DE  |
| EVM0005984 | LG2 | Uncharacterized protein TCM_C  | not DE   | not DE   | 1.186122 | 0.04565 |
| EVM0013396 | LG2 | Uncharacterized protein TCM_C  | not DE   | not DE   | not DE   | not DE  |
| EVM0023854 | LG2 | Uncharacterized protein TCM_C  | not DE   | not DE   | not DE   | not DE  |
| EVM0016104 | LG2 | Uncharacterized protein TCM_C  | not DE   | not DE   | not DE   | not DE  |
| EVM0006082 | LG2 | Uncharacterized protein TCM_C  | not DE   | not DE   | not DE   | not DE  |
| EVM0009848 | LG2 | Uncharacterized protein TCM_C  | not DE   | not DE   | not DE   | not DE  |
| EVM0022881 | LG2 | Uncharacterized protein TCM_C  | not DE   | not DE   | not DE   | not DE  |

|            |     |                                |          |          |          |         |
|------------|-----|--------------------------------|----------|----------|----------|---------|
| EVM0001978 | LG2 | Uncharacterized protein isofo  | not DE   | not DE   | 1.366131 | 0.00026 |
| EVM0013319 | LG2 | Uncharacterized protein isofo  | not DE   | not DE   | not DE   | not DE  |
| EVM0022192 | LG2 | Uncharacterized protein isofo  | not DE   | not DE   | not DE   | not DE  |
| EVM0001706 | LG2 | Uncharacterized protein isofo  | not DE   | not DE   | not DE   | not DE  |
| EVM0003139 | LG2 | Uncharacterized protein isofo  | not DE   | not DE   | not DE   | not DE  |
| EVM0004164 | LG2 | Uncharacterized protein isofo  | not DE   | not DE   | not DE   | not DE  |
| EVM0015676 | LG2 | Vacuolar iron transporter fam  | not DE   | not DE   | not DE   | not DE  |
| EVM0006339 | LG2 | WRKY transcription factor 53   | not DE   | not DE   | not DE   | not DE  |
| EVM0020878 | LG2 | XYLEM CYSTEINE PEPTIDASE 1 fa  | not DE   | not DE   | not DE   | not DE  |
| EVM0016209 | LG2 | Zinc ion binding, DNA binding, | not DE   | not DE   | not DE   | not DE  |
| EVM0020110 | LG2 | Zinc ion binding, DNA binding, | not DE   | not DE   | not DE   | not DE  |
| EVM0020081 | LG2 | aldo-keto reductase, putative  | not DE   | not DE   | not DE   | not DE  |
| EVM0016922 | LG2 | amino acid transporter, putat  | not DE   | not DE   | not DE   | not DE  |
| EVM0000038 | LG2 | arginine decarboxylase         | not DE   | not DE   | not DE   | not DE  |
| EVM0001849 | LG2 | auxin response factor          | not DE   | not DE   | not DE   | not DE  |
| EVM0009465 | LG2 | auxin response factor-like pr  | not DE   | not DE   | not DE   | not DE  |
| EVM0020986 | LG2 | carbamoyl-phosphate synthetas  | 1.771144 | 0.009452 | not DE   | not DE  |
| EVM0008012 | LG2 | chaos family protein           | -1.29783 | 0.008346 | not DE   | not DE  |
| EVM0010214 | LG2 | chitinase family protein       | not DE   | not DE   | not DE   | not DE  |
| EVM0000403 | LG2 | conserved hypothetical protei  | not DE   | not DE   | not DE   | not DE  |
| EVM0004578 | LG2 | conserved hypothetical protei  | not DE   | not DE   | not DE   | not DE  |
| EVM0007936 | LG2 | conserved hypothetical protei  | not DE   | not DE   | not DE   | not DE  |
| EVM0008300 | LG2 | conserved hypothetical protei  | not DE   | not DE   | not DE   | not DE  |
| EVM0016211 | LG2 | conserved hypothetical protei  | not DE   | not DE   | not DE   | not DE  |
| EVM0017320 | LG2 | conserved hypothetical protei  | not DE   | not DE   | not DE   | not DE  |
| EVM0018508 | LG2 | conserved hypothetical protei  | not DE   | not DE   | not DE   | not DE  |
| EVM0018516 | LG2 | conserved hypothetical protei  | not DE   | not DE   | 1.695549 | 0.01418 |
| EVM0021019 | LG2 | dc50, putative                 | not DE   | not DE   | not DE   | not DE  |
| EVM0023063 | LG2 | dehydrin protein               | not DE   | not DE   | not DE   | not DE  |
| EVM0010250 | LG2 | dicarboxylate transport 2.1    | not DE   | not DE   | -1.7213  | 0.03024 |
| EVM0005474 | LG2 | elongation factor 1-gamma-lik  | not DE   | not DE   | not DE   | not DE  |
| EVM0006831 | LG2 | endo-1,4-beta-glucanase        | not DE   | not DE   | not DE   | not DE  |
| EVM0021756 | LG2 | fructose-bisphosphate aldolas  | -2.21911 | 3.72E-05 | not DE   | not DE  |
| EVM0004695 | LG2 | fruit weight 2.2-1 protein     | not DE   | not DE   | not DE   | not DE  |
| EVM0003078 | LG2 | geranylgeranyl pyrophosphate   | not DE   | not DE   | not DE   | not DE  |
| EVM0020439 | LG2 | glucose-1-phosphate adenylylt  | not DE   | not DE   | not DE   | not DE  |
| EVM0017430 | LG2 | hypothetical chloroplast RF15  | -2.12896 | 0.033587 | not DE   | not DE  |
| EVM0021547 | LG2 | hypothetical protein           | not DE   | not DE   | not DE   | not DE  |
| EVM0016653 | LG2 | hypothetical protein CICLE_vl  | not DE   | not DE   | not DE   | not DE  |
| EVM0007893 | LG2 | hypothetical protein CICLE_vl  | not DE   | not DE   | not DE   | not DE  |
| EVM0018146 | LG2 | hypothetical protein CICLE_vl  | not DE   | not DE   | -1.29763 | 0.0301  |
| EVM0012486 | LG2 | hypothetical protein CICLE_vl  | not DE   | not DE   | not DE   | not DE  |
| EVM0001437 | LG2 | hypothetical protein CICLE_vl  | not DE   | not DE   | not DE   | not DE  |
| EVM0002491 | LG2 | hypothetical protein CICLE_vl  | not DE   | not DE   | not DE   | not DE  |
| EVM0014517 | LG2 | hypothetical protein CICLE_vl  | not DE   | not DE   | not DE   | not DE  |
| EVM0012834 | LG2 | hypothetical protein CICLE_vl  | not DE   | not DE   | not DE   | not DE  |
| EVM0008336 | LG2 | hypothetical protein CICLE_vl  | not DE   | not DE   | -1.36796 | 0.0396  |
| EVM0006527 | LG2 | hypothetical protein CICLE_vl  | not DE   | not DE   | not DE   | not DE  |
| EVM0014355 | LG2 | hypothetical protein CICLE_vl  | not DE   | not DE   | not DE   | not DE  |
| EVM0009955 | LG2 | hypothetical protein CICLE_vl  | not DE   | not DE   | not DE   | not DE  |
| EVM0017695 | LG2 | hypothetical protein CICLE_vl  | not DE   | not DE   | not DE   | not DE  |
| EVM0005679 | LG2 | hypothetical protein CICLE_vl  | not DE   | not DE   | not DE   | not DE  |
| EVM0007473 | LG2 | hypothetical protein CICLE_vl  | not DE   | not DE   | not DE   | not DE  |
| EVM0021936 | LG2 | hypothetical protein CICLE_vl  | not DE   | not DE   | not DE   | not DE  |

|            |     |                               |          |          |        |        |
|------------|-----|-------------------------------|----------|----------|--------|--------|
| EVM0003440 | LG2 | hypothetical protein CICLE_v1 | not DE   | not DE   | not DE | not DE |
| EVM0017012 | LG2 | hypothetical protein CICLE_v1 | not DE   | not DE   | not DE | not DE |
| EVM0021866 | LG2 | hypothetical protein CICLE_v1 | not DE   | not DE   | not DE | not DE |
| EVM0020782 | LG2 | hypothetical protein CICLE_v1 | not DE   | not DE   | not DE | not DE |
| EVM0005114 | LG2 | hypothetical protein CICLE_v1 | not DE   | not DE   | not DE | not DE |
| EVM0014970 | LG2 | hypothetical protein CICLE_v1 | not DE   | not DE   | not DE | not DE |
| EVM0016145 | LG2 | hypothetical protein CICLE_v1 | not DE   | not DE   | not DE | not DE |
| EVM0020973 | LG2 | hypothetical protein CICLE_v1 | not DE   | not DE   | not DE | not DE |
| EVM0021562 | LG2 | hypothetical protein CICLE_v1 | not DE   | not DE   | not DE | not DE |
| EVM0014198 | LG2 | hypothetical protein CICLE_v1 | not DE   | not DE   | not DE | not DE |
| EVM0015413 | LG2 | hypothetical protein CICLE_v1 | not DE   | not DE   | not DE | not DE |
| EVM0004527 | LG2 | hypothetical protein CICLE_v1 | not DE   | not DE   | not DE | not DE |
| EVM0023209 | LG2 | hypothetical protein CICLE_v1 | not DE   | not DE   | not DE | not DE |
| EVM0011776 | LG2 | hypothetical protein CICLE_v1 | not DE   | not DE   | not DE | not DE |
| EVM0013764 | LG2 | hypothetical protein CICLE_v1 | not DE   | not DE   | not DE | not DE |
| EVM0022571 | LG2 | hypothetical protein CICLE_v1 | not DE   | not DE   | not DE | not DE |
| EVM0021986 | LG2 | hypothetical protein CICLE_v1 | not DE   | not DE   | not DE | not DE |
| EVM0016997 | LG2 | hypothetical protein CICLE_v1 | not DE   | not DE   | not DE | not DE |
| EVM0014953 | LG2 | hypothetical protein CICLE_v1 | not DE   | not DE   | not DE | not DE |
| EVM0006621 | LG2 | hypothetical protein CICLE_v1 | not DE   | not DE   | not DE | not DE |
| EVM0014798 | LG2 | hypothetical protein CICLE_v1 | not DE   | not DE   | not DE | not DE |
| EVM0014580 | LG2 | hypothetical protein CICLE_v1 | not DE   | not DE   | not DE | not DE |
| EVM0018317 | LG2 | hypothetical protein CICLE_v1 | not DE   | not DE   | not DE | not DE |
| EVM0008024 | LG2 | hypothetical protein CICLE_v1 | not DE   | not DE   | not DE | not DE |
| EVM0009332 | LG2 | hypothetical protein CICLE_v1 | not DE   | not DE   | not DE | not DE |
| EVM0016887 | LG2 | hypothetical protein CICLE_v1 | not DE   | not DE   | not DE | not DE |
| EVM0012447 | LG2 | hypothetical protein CICLE_v1 | not DE   | not DE   | not DE | not DE |
| EVM0006705 | LG2 | hypothetical protein CICLE_v1 | not DE   | not DE   | not DE | not DE |
| EVM0008268 | LG2 | hypothetical protein CICLE_v1 | not DE   | not DE   | not DE | not DE |
| EVM0001893 | LG2 | hypothetical protein CICLE_v1 | not DE   | not DE   | not DE | not DE |
| EVM0009541 | LG2 | hypothetical protein CICLE_v1 | not DE   | not DE   | not DE | not DE |
| EVM0022912 | LG2 | hypothetical protein CICLE_v1 | 1.802469 | 0.002026 | not DE | not DE |
| EVM0011036 | LG2 | hypothetical protein CICLE_v1 | not DE   | not DE   | not DE | not DE |
| EVM0023883 | LG2 | hypothetical protein CICLE_v1 | not DE   | not DE   | not DE | not DE |
| EVM0007992 | LG2 | hypothetical protein CICLE_v1 | not DE   | not DE   | not DE | not DE |
| EVM0013500 | LG2 | hypothetical protein CICLE_v1 | not DE   | not DE   | not DE | not DE |
| EVM0003414 | LG2 | hypothetical protein CICLE_v1 | not DE   | not DE   | not DE | not DE |
| EVM0008021 | LG2 | hypothetical protein CICLE_v1 | not DE   | not DE   | not DE | not DE |
| EVM0014685 | LG2 | hypothetical protein CICLE_v1 | not DE   | not DE   | not DE | not DE |
| EVM0010310 | LG2 | hypothetical protein CICLE_v1 | not DE   | not DE   | not DE | not DE |
| EVM0003473 | LG2 | hypothetical protein CICLE_v1 | -1.81341 | 0.000988 | not DE | not DE |
| EVM0017913 | LG2 | hypothetical protein CICLE_v1 | not DE   | not DE   | not DE | not DE |
| EVM0005523 | LG2 | hypothetical protein CICLE_v1 | not DE   | not DE   | not DE | not DE |
| EVM0008564 | LG2 | hypothetical protein CICLE_v1 | not DE   | not DE   | not DE | not DE |
| EVM0013358 | LG2 | hypothetical protein CICLE_v1 | not DE   | not DE   | not DE | not DE |
| EVM0002448 | LG2 | hypothetical protein CICLE_v1 | not DE   | not DE   | not DE | not DE |
| EVM0010677 | LG2 | hypothetical protein CICLE_v1 | not DE   | not DE   | not DE | not DE |
| EVM0024221 | LG2 | hypothetical protein CICLE_v1 | not DE   | not DE   | not DE | not DE |
| EVM0014194 | LG2 | hypothetical protein CICLE_v1 | not DE   | not DE   | not DE | not DE |
| EVM0002356 | LG2 | hypothetical protein CICLE_v1 | not DE   | not DE   | not DE | not DE |
| EVM0011267 | LG2 | hypothetical protein CICLE_v1 | not DE   | not DE   | not DE | not DE |
| EVM0014797 | LG2 | hypothetical protein CICLE_v1 | not DE   | not DE   | not DE | not DE |
| EVM0023580 | LG2 | hypothetical protein CICLE_v1 | not DE   | not DE   | not DE | not DE |
| EVM0007468 | LG2 | hypothetical protein CICLE_v1 | not DE   | not DE   | not DE | not DE |

|            |     |                               |         |          |          |         |
|------------|-----|-------------------------------|---------|----------|----------|---------|
| EVM0019004 | LG2 | hypothetical protein CICLE_v1 | not DE  | not DE   | not DE   | not DE  |
| EVM0019824 | LG2 | hypothetical protein CICLE_v1 | -1.3402 | 0.000867 | not DE   | not DE  |
| EVM0001031 | LG2 | hypothetical protein CICLE_v1 | not DE  | not DE   | not DE   | not DE  |
| EVM0008993 | LG2 | hypothetical protein CICLE_v1 | not DE  | not DE   | 1.20233  | #####   |
| EVM0012707 | LG2 | hypothetical protein CICLE_v1 | not DE  | not DE   | not DE   | not DE  |
| EVM0011950 | LG2 | hypothetical protein CICLE_v1 | not DE  | not DE   | not DE   | not DE  |
| EVM0023035 | LG2 | hypothetical protein CICLE_v1 | not DE  | not DE   | not DE   | not DE  |
| EVM0024110 | LG2 | hypothetical protein CICLE_v1 | not DE  | not DE   | not DE   | not DE  |
| EVM0003674 | LG2 | hypothetical protein CICLE_v1 | not DE  | not DE   | -1.07023 | 0.00035 |
| EVM0008207 | LG2 | hypothetical protein CICLE_v1 | not DE  | not DE   | not DE   | not DE  |
| EVM0010385 | LG2 | hypothetical protein CICLE_v1 | not DE  | not DE   | not DE   | not DE  |
| EVM0024660 | LG2 | hypothetical protein CICLE_v1 | not DE  | not DE   | not DE   | not DE  |
| EVM0018658 | LG2 | hypothetical protein CICLE_v1 | not DE  | not DE   | not DE   | not DE  |
| EVM0016046 | LG2 | hypothetical protein CICLE_v1 | not DE  | not DE   | not DE   | not DE  |
| EVM0016791 | LG2 | hypothetical protein CICLE_v1 | not DE  | not DE   | not DE   | not DE  |
| EVM0000513 | LG2 | hypothetical protein CICLE_v1 | not DE  | not DE   | not DE   | not DE  |
| EVM0005606 | LG2 | hypothetical protein CICLE_v1 | not DE  | not DE   | not DE   | not DE  |
| EVM0009177 | LG2 | hypothetical protein CICLE_v1 | not DE  | not DE   | not DE   | not DE  |
| EVM0008888 | LG2 | hypothetical protein CICLE_v1 | not DE  | not DE   | not DE   | not DE  |
| EVM0012106 | LG2 | hypothetical protein CICLE_v1 | not DE  | not DE   | not DE   | not DE  |
| EVM0003022 | LG2 | hypothetical protein CICLE_v1 | not DE  | not DE   | not DE   | not DE  |
| EVM0015261 | LG2 | hypothetical protein CICLE_v1 | not DE  | not DE   | not DE   | not DE  |
| EVM0016918 | LG2 | hypothetical protein CICLE_v1 | not DE  | not DE   | not DE   | not DE  |
| EVM0008568 | LG2 | hypothetical protein CICLE_v1 | not DE  | not DE   | not DE   | not DE  |
| EVM0016088 | LG2 | hypothetical protein CICLE_v1 | not DE  | not DE   | not DE   | not DE  |
| EVM0017067 | LG2 | hypothetical protein CICLE_v1 | not DE  | not DE   | not DE   | not DE  |
| EVM0012189 | LG2 | hypothetical protein CICLE_v1 | not DE  | not DE   | not DE   | not DE  |
| EVM0012916 | LG2 | hypothetical protein CICLE_v1 | not DE  | not DE   | not DE   | not DE  |
| EVM0001465 | LG2 | hypothetical protein CICLE_v1 | not DE  | not DE   | not DE   | not DE  |
| EVM0009798 | LG2 | hypothetical protein CICLE_v1 | not DE  | not DE   | not DE   | not DE  |
| EVM0003050 | LG2 | hypothetical protein CICLE_v1 | not DE  | not DE   | not DE   | not DE  |
| EVM0003520 | LG2 | hypothetical protein CICLE_v1 | not DE  | not DE   | not DE   | not DE  |
| EVM0003601 | LG2 | hypothetical protein CICLE_v1 | not DE  | not DE   | not DE   | not DE  |
| EVM0004426 | LG2 | hypothetical protein CICLE_v1 | not DE  | not DE   | not DE   | not DE  |
| EVM0006799 | LG2 | hypothetical protein CICLE_v1 | not DE  | not DE   | not DE   | not DE  |
| EVM0008357 | LG2 | hypothetical protein CICLE_v1 | not DE  | not DE   | not DE   | not DE  |
| EVM0009711 | LG2 | hypothetical protein CICLE_v1 | not DE  | not DE   | not DE   | not DE  |
| EVM0012052 | LG2 | hypothetical protein CICLE_v1 | not DE  | not DE   | not DE   | not DE  |
| EVM0014969 | LG2 | hypothetical protein CICLE_v1 | not DE  | not DE   | not DE   | not DE  |
| EVM0015917 | LG2 | hypothetical protein CICLE_v1 | not DE  | not DE   | not DE   | not DE  |
| EVM0020326 | LG2 | hypothetical protein CICLE_v1 | not DE  | not DE   | not DE   | not DE  |
| EVM0022875 | LG2 | hypothetical protein CICLE_v1 | not DE  | not DE   | not DE   | not DE  |
| EVM0008848 | LG2 | hypothetical protein CICLE_v1 | not DE  | not DE   | not DE   | not DE  |
| EVM0001252 | LG2 | hypothetical protein CICLE_v1 | not DE  | not DE   | not DE   | not DE  |
| EVM0015308 | LG2 | hypothetical protein CICLE_v1 | not DE  | not DE   | not DE   | not DE  |
| EVM0006446 | LG2 | hypothetical protein CICLE_v1 | not DE  | not DE   | not DE   | not DE  |
| EVM0003599 | LG2 | hypothetical protein CICLE_v1 | not DE  | not DE   | not DE   | not DE  |
| EVM0010409 | LG2 | hypothetical protein CICLE_v1 | not DE  | not DE   | not DE   | not DE  |
| EVM0006317 | LG2 | hypothetical protein CICLE_v1 | not DE  | not DE   | not DE   | not DE  |
| EVM0018589 | LG2 | hypothetical protein CICLE_v1 | not DE  | not DE   | not DE   | not DE  |
| EVM0001808 | LG2 | hypothetical protein CICLE_v1 | not DE  | not DE   | not DE   | not DE  |
| EVM0023436 | LG2 | hypothetical protein CICLE_v1 | not DE  | not DE   | not DE   | not DE  |
| EVM0008678 | LG2 | hypothetical protein CICLE_v1 | not DE  | not DE   | not DE   | not DE  |
| EVM0013712 | LG2 | hypothetical protein CICLE_v1 | not DE  | not DE   | not DE   | not DE  |



|            |     |                               |          |          |          |         |
|------------|-----|-------------------------------|----------|----------|----------|---------|
| EVM0005752 | LG2 | hypothetical protein CICLE_v1 | not DE   | not DE   | -1.1907  | #####   |
| EVM0006871 | LG2 | hypothetical protein CICLE_v1 | not DE   | not DE   | not DE   | not DE  |
| EVM0007120 | LG2 | hypothetical protein CICLE_v1 | not DE   | not DE   | -1.32198 | 0.00014 |
| EVM0020245 | LG2 | hypothetical protein CICLE_v1 | not DE   | not DE   | not DE   | not DE  |
| EVM0003150 | LG2 | hypothetical protein CICLE_v1 | not DE   | not DE   | not DE   | not DE  |
| EVM0011523 | LG2 | hypothetical protein CICLE_v1 | not DE   | not DE   | not DE   | not DE  |
| EVM0012419 | LG2 | hypothetical protein CICLE_v1 | 6.515293 | 9.38E-05 | not DE   | not DE  |
| EVM0001061 | LG2 | hypothetical protein CICLE_v1 | not DE   | not DE   | not DE   | not DE  |
| EVM0012063 | LG2 | hypothetical protein CICLE_v1 | not DE   | not DE   | not DE   | not DE  |
| EVM0017082 | LG2 | hypothetical protein CICLE_v1 | not DE   | not DE   | not DE   | not DE  |
| EVM0016511 | LG2 | hypothetical protein CICLE_v1 | not DE   | not DE   | not DE   | not DE  |
| EVM0013318 | LG2 | hypothetical protein CICLE_v1 | not DE   | not DE   | not DE   | not DE  |
| EVM0013193 | LG2 | hypothetical protein CICLE_v1 | not DE   | not DE   | not DE   | not DE  |
| EVM0023946 | LG2 | hypothetical protein CICLE_v1 | not DE   | not DE   | not DE   | not DE  |
| EVM0012520 | LG2 | hypothetical protein CICLE_v1 | not DE   | not DE   | not DE   | not DE  |
| EVM0016222 | LG2 | hypothetical protein CICLE_v1 | not DE   | not DE   | not DE   | not DE  |
| EVM0023844 | LG2 | hypothetical protein CICLE_v1 | not DE   | not DE   | not DE   | not DE  |
| EVM0018549 | LG2 | hypothetical protein CICLE_v1 | not DE   | not DE   | not DE   | not DE  |
| EVM0000782 | LG2 | hypothetical protein CICLE_v1 | not DE   | not DE   | not DE   | not DE  |
| EVM0015503 | LG2 | hypothetical protein CICLE_v1 | not DE   | not DE   | not DE   | not DE  |
| EVM0002834 | LG2 | hypothetical protein CICLE_v1 | not DE   | not DE   | not DE   | not DE  |
| EVM0015509 | LG2 | hypothetical protein CICLE_v1 | not DE   | not DE   | not DE   | not DE  |
| EVM0001881 | LG2 | hypothetical protein CICLE_v1 | not DE   | not DE   | not DE   | not DE  |
| EVM0005581 | LG2 | hypothetical protein CICLE_v1 | not DE   | not DE   | not DE   | not DE  |
| EVM0024498 | LG2 | hypothetical protein CICLE_v1 | not DE   | not DE   | not DE   | not DE  |
| EVM0019818 | LG2 | hypothetical protein CICLE_v1 | not DE   | not DE   | not DE   | not DE  |
| EVM0011715 | LG2 | hypothetical protein CICLE_v1 | not DE   | not DE   | not DE   | not DE  |
| EVM0003488 | LG2 | hypothetical protein CICLE_v1 | not DE   | not DE   | not DE   | not DE  |
| EVM0011583 | LG2 | hypothetical protein CICLE_v1 | not DE   | not DE   | not DE   | not DE  |
| EVM0024609 | LG2 | hypothetical protein CICLE_v1 | not DE   | not DE   | not DE   | not DE  |
| EVM0000678 | LG2 | hypothetical protein CICLE_v1 | not DE   | not DE   | not DE   | not DE  |
| EVM0008356 | LG2 | hypothetical protein CICLE_v1 | not DE   | not DE   | not DE   | not DE  |
| EVM0003184 | LG2 | hypothetical protein CICLE_v1 | not DE   | not DE   | not DE   | not DE  |
| EVM0019196 | LG2 | hypothetical protein CICLE_v1 | not DE   | not DE   | not DE   | not DE  |
| EVM0014568 | LG2 | hypothetical protein CICLE_v1 | not DE   | not DE   | not DE   | not DE  |
| EVM0019642 | LG2 | hypothetical protein CICLE_v1 | not DE   | not DE   | not DE   | not DE  |
| EVM0016868 | LG2 | hypothetical protein CICLE_v1 | -1.0562  | 0.036071 | not DE   | not DE  |
| EVM0009932 | LG2 | hypothetical protein CICLE_v1 | not DE   | not DE   | not DE   | not DE  |
| EVM0000564 | LG2 | hypothetical protein CICLE_v1 | not DE   | not DE   | not DE   | not DE  |
| EVM0008202 | LG2 | hypothetical protein CICLE_v1 | not DE   | not DE   | not DE   | not DE  |
| EVM0015139 | LG2 | hypothetical protein CICLE_v1 | not DE   | not DE   | not DE   | not DE  |
| EVM0007396 | LG2 | hypothetical protein CICLE_v1 | not DE   | not DE   | not DE   | not DE  |
| EVM0014538 | LG2 | hypothetical protein CICLE_v1 | not DE   | not DE   | not DE   | not DE  |
| EVM0005230 | LG2 | hypothetical protein CICLE_v1 | not DE   | not DE   | not DE   | not DE  |
| EVM0014516 | LG2 | hypothetical protein CICLE_v1 | not DE   | not DE   | not DE   | not DE  |
| EVM0017616 | LG2 | hypothetical protein CICLE_v1 | not DE   | not DE   | not DE   | not DE  |
| EVM0010670 | LG2 | hypothetical protein CICLE_v1 | not DE   | not DE   | not DE   | not DE  |
| EVM0002656 | LG2 | hypothetical protein CICLE_v1 | not DE   | not DE   | not DE   | not DE  |
| EVM0004019 | LG2 | hypothetical protein CICLE_v1 | not DE   | not DE   | not DE   | not DE  |
| EVM0013896 | LG2 | hypothetical protein CICLE_v1 | not DE   | not DE   | not DE   | not DE  |
| EVM0015225 | LG2 | hypothetical protein CICLE_v1 | not DE   | not DE   | not DE   | not DE  |
| EVM0007670 | LG2 | hypothetical protein CICLE_v1 | not DE   | not DE   | not DE   | not DE  |
| EVM0002742 | LG2 | hypothetical protein CICLE_v1 | not DE   | not DE   | not DE   | not DE  |
| EVM0004548 | LG2 | hypothetical protein CICLE_v1 | not DE   | not DE   | not DE   | not DE  |

|            |     |                               |          |          |          |         |
|------------|-----|-------------------------------|----------|----------|----------|---------|
| EVM0005825 | LG2 | hypothetical protein CICLE_v1 | not DE   | not DE   | not DE   | not DE  |
| EVM0012388 | LG2 | hypothetical protein CICLE_v1 | not DE   | not DE   | not DE   | not DE  |
| EVM0017431 | LG2 | hypothetical protein CICLE_v1 | not DE   | not DE   | not DE   | not DE  |
| EVM0022419 | LG2 | hypothetical protein CICLE_v1 | not DE   | not DE   | not DE   | not DE  |
| EVM0009416 | LG2 | hypothetical protein CICLE_v1 | not DE   | not DE   | not DE   | not DE  |
| EVM0012722 | LG2 | hypothetical protein CICLE_v1 | not DE   | not DE   | not DE   | not DE  |
| EVM0014032 | LG2 | hypothetical protein CICLE_v1 | not DE   | not DE   | not DE   | not DE  |
| EVM0005073 | LG2 | hypothetical protein CICLE_v1 | not DE   | not DE   | not DE   | not DE  |
| EVM0022077 | LG2 | hypothetical protein CICLE_v1 | not DE   | not DE   | not DE   | not DE  |
| EVM0010130 | LG2 | hypothetical protein CICLE_v1 | not DE   | not DE   | not DE   | not DE  |
| EVM0001539 | LG2 | hypothetical protein CICLE_v1 | not DE   | not DE   | not DE   | not DE  |
| EVM0021950 | LG2 | hypothetical protein CICLE_v1 | not DE   | not DE   | not DE   | not DE  |
| EVM0020471 | LG2 | hypothetical protein CICLE_v1 | not DE   | not DE   | -1.36206 | 0.00019 |
| EVM0024440 | LG2 | hypothetical protein CICLE_v1 | not DE   | not DE   | not DE   | not DE  |
| EVM0003388 | LG2 | hypothetical protein CICLE_v1 | not DE   | not DE   | not DE   | not DE  |
| EVM0011629 | LG2 | hypothetical protein CICLE_v1 | not DE   | not DE   | not DE   | not DE  |
| EVM0003221 | LG2 | hypothetical protein CICLE_v1 | not DE   | not DE   | not DE   | not DE  |
| EVM0021592 | LG2 | hypothetical protein CICLE_v1 | not DE   | not DE   | not DE   | not DE  |
| EVM0002482 | LG2 | hypothetical protein CICLE_v1 | not DE   | not DE   | not DE   | not DE  |
| EVM0008527 | LG2 | hypothetical protein CICLE_v1 | not DE   | not DE   | not DE   | not DE  |
| EVM0024068 | LG2 | hypothetical protein CICLE_v1 | not DE   | not DE   | not DE   | not DE  |
| EVM0019211 | LG2 | hypothetical protein CICLE_v1 | not DE   | not DE   | not DE   | not DE  |
| EVM0002599 | LG2 | hypothetical protein CICLE_v1 | not DE   | not DE   | not DE   | not DE  |
| EVM0018184 | LG2 | hypothetical protein CICLE_v1 | 1.587349 | 0.000603 | not DE   | not DE  |
| EVM0024180 | LG2 | hypothetical protein CICLE_v1 | not DE   | not DE   | not DE   | not DE  |
| EVM0023828 | LG2 | hypothetical protein CICLE_v1 | not DE   | not DE   | not DE   | not DE  |
| EVM0018368 | LG2 | hypothetical protein CICLE_v1 | not DE   | not DE   | not DE   | not DE  |
| EVM0017662 | LG2 | hypothetical protein CICLE_v1 | not DE   | not DE   | not DE   | not DE  |
| EVM0016559 | LG2 | hypothetical protein CICLE_v1 | not DE   | not DE   | not DE   | not DE  |
| EVM0008439 | LG2 | hypothetical protein CICLE_v1 | not DE   | not DE   | not DE   | not DE  |
| EVM0022276 | LG2 | hypothetical protein CICLE_v1 | not DE   | not DE   | not DE   | not DE  |
| EVM0014051 | LG2 | hypothetical protein CICLE_v1 | -3.65445 | 0.025336 | -2.89536 | #####   |
| EVM0014741 | LG2 | hypothetical protein CICLE_v1 | not DE   | not DE   | not DE   | not DE  |
| EVM0020926 | LG2 | hypothetical protein CICLE_v1 | not DE   | not DE   | not DE   | not DE  |
| EVM0000483 | LG2 | hypothetical protein CICLE_v1 | 1.112439 | 0.03734  | not DE   | not DE  |
| EVM0022546 | LG2 | hypothetical protein CICLE_v1 | not DE   | not DE   | not DE   | not DE  |
| EVM0011899 | LG2 | hypothetical protein CICLE_v1 | not DE   | not DE   | not DE   | not DE  |
| EVM0011977 | LG2 | hypothetical protein CICLE_v1 | 3.014048 | 0.020988 | not DE   | not DE  |
| EVM0012381 | LG2 | hypothetical protein CICLE_v1 | 3.364    | 0.005386 | not DE   | not DE  |
| EVM0023677 | LG2 | hypothetical protein CICLE_v1 | not DE   | not DE   | not DE   | not DE  |
| EVM0003528 | LG2 | hypothetical protein CICLE_v1 | not DE   | not DE   | not DE   | not DE  |
| EVM0002956 | LG2 | hypothetical protein CICLE_v1 | not DE   | not DE   | not DE   | not DE  |
| EVM0016015 | LG2 | hypothetical protein CICLE_v1 | not DE   | not DE   | not DE   | not DE  |
| EVM0002514 | LG2 | hypothetical protein CICLE_v1 | not DE   | not DE   | not DE   | not DE  |
| EVM0008717 | LG2 | hypothetical protein CICLE_v1 | not DE   | not DE   | not DE   | not DE  |
| EVM0020655 | LG2 | hypothetical protein CICLE_v1 | not DE   | not DE   | not DE   | not DE  |
| EVM0022550 | LG2 | hypothetical protein CICLE_v1 | not DE   | not DE   | not DE   | not DE  |
| EVM0017407 | LG2 | hypothetical protein CICLE_v1 | not DE   | not DE   | not DE   | not DE  |
| EVM0020775 | LG2 | hypothetical protein CICLE_v1 | not DE   | not DE   | not DE   | not DE  |
| EVM0005144 | LG2 | hypothetical protein CICLE_v1 | not DE   | not DE   | not DE   | not DE  |
| EVM0023909 | LG2 | hypothetical protein CICLE_v1 | not DE   | not DE   | not DE   | not DE  |
| EVM0015388 | LG2 | hypothetical protein CICLE_v1 | not DE   | not DE   | not DE   | not DE  |
| EVM0022325 | LG2 | hypothetical protein CICLE_v1 | not DE   | not DE   | not DE   | not DE  |
| EVM0011654 | LG2 | hypothetical protein CICLE_v1 | not DE   | not DE   | not DE   | not DE  |

|            |     |                               |          |          |        |        |
|------------|-----|-------------------------------|----------|----------|--------|--------|
| EVM0004314 | LG2 | hypothetical protein CICLE_v1 | not DE   | not DE   | not DE | not DE |
| EVM0014008 | LG2 | hypothetical protein CICLE_v1 | 1.702735 | 0.009296 | not DE | not DE |
| EVM0011241 | LG2 | hypothetical protein CICLE_v1 | not DE   | not DE   | not DE | not DE |
| EVM0004155 | LG2 | hypothetical protein CICLE_v1 | not DE   | not DE   | not DE | not DE |
| EVM0013383 | LG2 | hypothetical protein CICLE_v1 | not DE   | not DE   | not DE | not DE |
| EVM0009327 | LG2 | hypothetical protein CICLE_v1 | -2.56478 | 0.000232 | not DE | not DE |
| EVM0002714 | LG2 | hypothetical protein CICLE_v1 | not DE   | not DE   | not DE | not DE |
| EVM0015729 | LG2 | hypothetical protein CICLE_v1 | -2.30048 | 0.012049 | not DE | not DE |
| EVM0007528 | LG2 | hypothetical protein CICLE_v1 | -1.00261 | 0.036286 | not DE | not DE |
| EVM0001462 | LG2 | hypothetical protein CICLE_v1 | not DE   | not DE   | not DE | not DE |
| EVM0012271 | LG2 | hypothetical protein CICLE_v1 | 1.43375  | 0.004485 | not DE | not DE |
| EVM0022692 | LG2 | hypothetical protein CICLE_v1 | not DE   | not DE   | not DE | not DE |
| EVM0006934 | LG2 | hypothetical protein CICLE_v1 | not DE   | not DE   | not DE | not DE |
| EVM0003682 | LG2 | hypothetical protein CICLE_v1 | not DE   | not DE   | not DE | not DE |
| EVM0012657 | LG2 | hypothetical protein CICLE_v1 | not DE   | not DE   | not DE | not DE |
| EVM0002130 | LG2 | hypothetical protein CICLE_v1 | not DE   | not DE   | not DE | not DE |
| EVM0010470 | LG2 | hypothetical protein CICLE_v1 | not DE   | not DE   | not DE | not DE |
| EVM0009636 | LG2 | hypothetical protein CICLE_v1 | not DE   | not DE   | not DE | not DE |
| EVM0022952 | LG2 | hypothetical protein CICLE_v1 | not DE   | not DE   | not DE | not DE |
| EVM0008217 | LG2 | hypothetical protein CICLE_v1 | -1.19459 | 0.000348 | not DE | not DE |
| EVM0001385 | LG2 | hypothetical protein CICLE_v1 | not DE   | not DE   | not DE | not DE |
| EVM0022498 | LG2 | hypothetical protein CICLE_v1 | not DE   | not DE   | not DE | not DE |
| EVM0022967 | LG2 | hypothetical protein CICLE_v1 | not DE   | not DE   | not DE | not DE |
| EVM0019771 | LG2 | hypothetical protein CICLE_v1 | not DE   | not DE   | not DE | not DE |
| EVM0018981 | LG2 | hypothetical protein CICLE_v1 | not DE   | not DE   | not DE | not DE |
| EVM0006496 | LG2 | hypothetical protein CICLE_v1 | not DE   | not DE   | not DE | not DE |
| EVM0005198 | LG2 | hypothetical protein CICLE_v1 | not DE   | not DE   | not DE | not DE |
| EVM0007300 | LG2 | hypothetical protein CICLE_v1 | not DE   | not DE   | not DE | not DE |
| EVM0021670 | LG2 | hypothetical protein CICLE_v1 | not DE   | not DE   | not DE | not DE |
| EVM0008463 | LG2 | hypothetical protein CICLE_v1 | not DE   | not DE   | not DE | not DE |
| EVM0014757 | LG2 | hypothetical protein CICLE_v1 | not DE   | not DE   | not DE | not DE |
| EVM0004487 | LG2 | hypothetical protein CICLE_v1 | not DE   | not DE   | not DE | not DE |
| EVM0008055 | LG2 | hypothetical protein CICLE_v1 | not DE   | not DE   | not DE | not DE |
| EVM0017829 | LG2 | hypothetical protein CICLE_v1 | not DE   | not DE   | not DE | not DE |
| EVM0005666 | LG2 | hypothetical protein CICLE_v1 | not DE   | not DE   | not DE | not DE |
| EVM0021307 | LG2 | hypothetical protein CICLE_v1 | not DE   | not DE   | not DE | not DE |
| EVM0004754 | LG2 | hypothetical protein CICLE_v1 | not DE   | not DE   | not DE | not DE |
| EVM0017220 | LG2 | hypothetical protein CICLE_v1 | 2.707849 | 0.004106 | not DE | not DE |
| EVM0019862 | LG2 | hypothetical protein CICLE_v1 | not DE   | not DE   | not DE | not DE |
| EVM0018050 | LG2 | hypothetical protein CICLE_v1 | not DE   | not DE   | not DE | not DE |
| EVM0014722 | LG2 | hypothetical protein CICLE_v1 | not DE   | not DE   | not DE | not DE |
| EVM0000516 | LG2 | hypothetical protein CICLE_v1 | not DE   | not DE   | not DE | not DE |
| EVM0014070 | LG2 | hypothetical protein CICLE_v1 | not DE   | not DE   | not DE | not DE |
| EVM0019146 | LG2 | hypothetical protein CICLE_v1 | not DE   | not DE   | not DE | not DE |
| EVM0016231 | LG2 | hypothetical protein CICLE_v1 | not DE   | not DE   | not DE | not DE |
| EVM0017778 | LG2 | hypothetical protein CICLE_v1 | not DE   | not DE   | not DE | not DE |
| EVM0021532 | LG2 | hypothetical protein CICLE_v1 | not DE   | not DE   | not DE | not DE |
| EVM0001755 | LG2 | hypothetical protein CICLE_v1 | not DE   | not DE   | not DE | not DE |
| EVM0022895 | LG2 | hypothetical protein CICLE_v1 | not DE   | not DE   | not DE | not DE |
| EVM0019482 | LG2 | hypothetical protein CICLE_v1 | not DE   | not DE   | not DE | not DE |
| EVM0010908 | LG2 | hypothetical protein CICLE_v1 | -1.19376 | 0.031195 | not DE | not DE |
| EVM0002343 | LG2 | hypothetical protein CICLE_v1 | not DE   | not DE   | not DE | not DE |
| EVM0002101 | LG2 | hypothetical protein CICLE_v1 | not DE   | not DE   | not DE | not DE |
| EVM0015657 | LG2 | hypothetical protein CICLE_v1 | not DE   | not DE   | not DE | not DE |

|            |     |                               |          |          |          |         |
|------------|-----|-------------------------------|----------|----------|----------|---------|
| EVM0004125 | LG2 | hypothetical protein CICLE_v1 | not DE   | not DE   | not DE   | not DE  |
| EVM0024321 | LG2 | hypothetical protein CICLE_v1 | not DE   | not DE   | not DE   | not DE  |
| EVM0004786 | LG2 | hypothetical protein CICLE_v1 | not DE   | not DE   | not DE   | not DE  |
| EVM0005888 | LG2 | hypothetical protein CICLE_v1 | not DE   | not DE   | not DE   | not DE  |
| EVM0006104 | LG2 | hypothetical protein CICLE_v1 | not DE   | not DE   | not DE   | not DE  |
| EVM0016077 | LG2 | hypothetical protein CICLE_v1 | not DE   | not DE   | not DE   | not DE  |
| EVM0021622 | LG2 | hypothetical protein CICLE_v1 | not DE   | not DE   | not DE   | not DE  |
| EVM0011230 | LG2 | hypothetical protein CICLE_v1 | not DE   | not DE   | not DE   | not DE  |
| EVM0002687 | LG2 | hypothetical protein CICLE_v1 | not DE   | not DE   | not DE   | not DE  |
| EVM0016010 | LG2 | hypothetical protein CICLE_v1 | not DE   | not DE   | not DE   | not DE  |
| EVM0015219 | LG2 | hypothetical protein CICLE_v1 | not DE   | not DE   | not DE   | not DE  |
| EVM0023277 | LG2 | hypothetical protein CICLE_v1 | not DE   | not DE   | not DE   | not DE  |
| EVM0009006 | LG2 | hypothetical protein CICLE_v1 | not DE   | not DE   | 1.362637 | #####   |
| EVM0004888 | LG2 | hypothetical protein CICLE_v1 | not DE   | not DE   | not DE   | not DE  |
| EVM0000287 | LG2 | hypothetical protein CICLE_v1 | -3.50185 | 0.003618 | not DE   | not DE  |
| EVM0014789 | LG2 | hypothetical protein CICLE_v1 | not DE   | not DE   | not DE   | not DE  |
| EVM0001366 | LG2 | hypothetical protein CICLE_v1 | not DE   | not DE   | not DE   | not DE  |
| EVM0008832 | LG2 | hypothetical protein CICLE_v1 | not DE   | not DE   | not DE   | not DE  |
| EVM0004350 | LG2 | hypothetical protein CICLE_v1 | not DE   | not DE   | not DE   | not DE  |
| EVM0006055 | LG2 | hypothetical protein CICLE_v1 | not DE   | not DE   | not DE   | not DE  |
| EVM0019138 | LG2 | hypothetical protein CICLE_v1 | not DE   | not DE   | not DE   | not DE  |
| EVM0022091 | LG2 | hypothetical protein CICLE_v1 | not DE   | not DE   | not DE   | not DE  |
| EVM0021310 | LG2 | hypothetical protein CICLE_v1 | not DE   | not DE   | not DE   | not DE  |
| EVM0002802 | LG2 | hypothetical protein CICLE_v1 | not DE   | not DE   | not DE   | not DE  |
| EVM0008946 | LG2 | hypothetical protein CICLE_v1 | not DE   | not DE   | not DE   | not DE  |
| EVM0015809 | LG2 | hypothetical protein CICLE_v1 | not DE   | not DE   | not DE   | not DE  |
| EVM0001750 | LG2 | hypothetical protein CICLE_v1 | not DE   | not DE   | not DE   | not DE  |
| EVM0005343 | LG2 | hypothetical protein CICLE_v1 | -2.39362 | 0.00121  | not DE   | not DE  |
| EVM0012993 | LG2 | hypothetical protein CICLE_v1 | not DE   | not DE   | not DE   | not DE  |
| EVM0011855 | LG2 | hypothetical protein CICLE_v1 | -4.69488 | 3.08E-05 | 2.359171 | 0.02188 |
| EVM0022815 | LG2 | hypothetical protein CICLE_v1 | not DE   | not DE   | not DE   | not DE  |
| EVM0010565 | LG2 | hypothetical protein CICLE_v1 | not DE   | not DE   | not DE   | not DE  |
| EVM0016537 | LG2 | hypothetical protein CICLE_v1 | not DE   | not DE   | not DE   | not DE  |
| EVM0020983 | LG2 | hypothetical protein CICLE_v1 | not DE   | not DE   | not DE   | not DE  |
| EVM0019894 | LG2 | hypothetical protein CICLE_v1 | not DE   | not DE   | not DE   | not DE  |
| EVM0011250 | LG2 | hypothetical protein CICLE_v1 | not DE   | not DE   | not DE   | not DE  |
| EVM0020400 | LG2 | hypothetical protein CICLE_v1 | not DE   | not DE   | not DE   | not DE  |
| EVM0005039 | LG2 | hypothetical protein CICLE_v1 | not DE   | not DE   | not DE   | not DE  |
| EVM0008546 | LG2 | hypothetical protein CICLE_v1 | not DE   | not DE   | not DE   | not DE  |
| EVM0012825 | LG2 | hypothetical protein CICLE_v1 | not DE   | not DE   | not DE   | not DE  |
| EVM0013439 | LG2 | hypothetical protein CICLE_v1 | not DE   | not DE   | not DE   | not DE  |
| EVM0014199 | LG2 | hypothetical protein CICLE_v1 | not DE   | not DE   | not DE   | not DE  |
| EVM0015961 | LG2 | hypothetical protein CICLE_v1 | not DE   | not DE   | not DE   | not DE  |
| EVM0005676 | LG2 | hypothetical protein CICLE_v1 | not DE   | not DE   | not DE   | not DE  |
| EVM0009956 | LG2 | hypothetical protein CICLE_v1 | not DE   | not DE   | not DE   | not DE  |
| EVM0017819 | LG2 | hypothetical protein CICLE_v1 | not DE   | not DE   | not DE   | not DE  |
| EVM0012425 | LG2 | hypothetical protein CICLE_v1 | not DE   | not DE   | not DE   | not DE  |
| EVM0004461 | LG2 | hypothetical protein CICLE_v1 | 5.318099 | 4.40E-05 | not DE   | not DE  |
| EVM0019213 | LG2 | hypothetical protein CICLE_v1 | not DE   | not DE   | not DE   | not DE  |
| EVM0014175 | LG2 | hypothetical protein CICLE_v1 | not DE   | not DE   | not DE   | not DE  |
| EVM0003654 | LG2 | hypothetical protein CICLE_v1 | -2.56854 | 0.031723 | not DE   | not DE  |
| EVM0008586 | LG2 | hypothetical protein CICLE_v1 | not DE   | not DE   | not DE   | not DE  |
| EVM0018447 | LG2 | hypothetical protein CICLE_v1 | not DE   | not DE   | not DE   | not DE  |
| EVM0008010 | LG2 | hypothetical protein CICLE_v1 | not DE   | not DE   | not DE   | not DE  |

|            |     |                               |          |          |          |         |
|------------|-----|-------------------------------|----------|----------|----------|---------|
| EVM0016455 | LG2 | hypothetical protein CICLE_v1 | not DE   | not DE   | 1.482902 | 0.01948 |
| EVM0018671 | LG2 | hypothetical protein CICLE_v1 | not DE   | not DE   | not DE   | not DE  |
| EVM0009853 | LG2 | hypothetical protein CICLE_v1 | not DE   | not DE   | not DE   | not DE  |
| EVM0006163 | LG2 | hypothetical protein CICLE_v1 | not DE   | not DE   | not DE   | not DE  |
| EVM0008328 | LG2 | hypothetical protein CICLE_v1 | not DE   | not DE   | not DE   | not DE  |
| EVM0019988 | LG2 | hypothetical protein CICLE_v1 | not DE   | not DE   | not DE   | not DE  |
| EVM0019070 | LG2 | hypothetical protein CICLE_v1 | not DE   | not DE   | not DE   | not DE  |
| EVM0017243 | LG2 | hypothetical protein CICLE_v1 | not DE   | not DE   | not DE   | not DE  |
| EVM0019348 | LG2 | hypothetical protein CICLE_v1 | not DE   | not DE   | not DE   | not DE  |
| EVM0003783 | LG2 | hypothetical protein CICLE_v1 | not DE   | not DE   | 1.7052   | 0.00284 |
| EVM0007332 | LG2 | hypothetical protein CICLE_v1 | not DE   | not DE   | not DE   | not DE  |
| EVM0009394 | LG2 | hypothetical protein CICLE_v1 | not DE   | not DE   | not DE   | not DE  |
| EVM0004365 | LG2 | hypothetical protein CICLE_v1 | not DE   | not DE   | not DE   | not DE  |
| EVM0015888 | LG2 | hypothetical protein CICLE_v1 | not DE   | not DE   | not DE   | not DE  |
| EVM0001632 | LG2 | hypothetical protein CICLE_v1 | not DE   | not DE   | not DE   | not DE  |
| EVM0020441 | LG2 | hypothetical protein CICLE_v1 | not DE   | not DE   | 1.556546 | #####   |
| EVM0003513 | LG2 | hypothetical protein CICLE_v1 | not DE   | not DE   | not DE   | not DE  |
| EVM0012539 | LG2 | hypothetical protein CICLE_v1 | not DE   | not DE   | not DE   | not DE  |
| EVM0010727 | LG2 | hypothetical protein CICLE_v1 | not DE   | not DE   | not DE   | not DE  |
| EVM0005531 | LG2 | hypothetical protein CICLE_v1 | not DE   | not DE   | not DE   | not DE  |
| EVM0008004 | LG2 | hypothetical protein CICLE_v1 | 4.827394 | 0.028972 | not DE   | not DE  |
| EVM0019796 | LG2 | hypothetical protein CISIN_1g | not DE   | not DE   | not DE   | not DE  |
| EVM0003978 | LG2 | hypothetical protein CISIN_1g | not DE   | not DE   | -1.02925 | 0.0001  |
| EVM0009753 | LG2 | hypothetical protein CISIN_1g | not DE   | not DE   | not DE   | not DE  |
| EVM0003229 | LG2 | hypothetical protein CISIN_1g | not DE   | not DE   | not DE   | not DE  |
| EVM0019280 | LG2 | hypothetical protein CISIN_1g | not DE   | not DE   | not DE   | not DE  |
| EVM0017356 | LG2 | hypothetical protein CISIN_1g | not DE   | not DE   | -2.02133 | 0.00327 |
| EVM0017298 | LG2 | hypothetical protein CISIN_1g | not DE   | not DE   | not DE   | not DE  |
| EVM0009417 | LG2 | hypothetical protein CISIN_1g | not DE   | not DE   | not DE   | not DE  |
| EVM0014674 | LG2 | hypothetical protein CISIN_1g | not DE   | not DE   | not DE   | not DE  |
| EVM0009947 | LG2 | hypothetical protein CISIN_1g | not DE   | not DE   | not DE   | not DE  |
| EVM0019054 | LG2 | hypothetical protein CISIN_1g | not DE   | not DE   | 1.112995 | 0.01906 |
| EVM0009430 | LG2 | hypothetical protein CISIN_1g | not DE   | not DE   | not DE   | not DE  |
| EVM0004245 | LG2 | hypothetical protein CISIN_1g | not DE   | not DE   | not DE   | not DE  |
| EVM0001261 | LG2 | hypothetical protein CISIN_1g | not DE   | not DE   | not DE   | not DE  |
| EVM0023340 | LG2 | hypothetical protein CISIN_1g | not DE   | not DE   | not DE   | not DE  |
| EVM0019458 | LG2 | hypothetical protein CISIN_1g | not DE   | not DE   | not DE   | not DE  |
| EVM0024637 | LG2 | hypothetical protein CISIN_1g | not DE   | not DE   | not DE   | not DE  |
| EVM0023178 | LG2 | hypothetical protein CISIN_1g | not DE   | not DE   | not DE   | not DE  |
| EVM0018812 | LG2 | hypothetical protein CISIN_1g | not DE   | not DE   | not DE   | not DE  |
| EVM0023584 | LG2 | hypothetical protein CISIN_1g | not DE   | not DE   | not DE   | not DE  |
| EVM0006880 | LG2 | hypothetical protein CISIN_1g | not DE   | not DE   | not DE   | not DE  |
| EVM0009944 | LG2 | hypothetical protein CISIN_1g | not DE   | not DE   | not DE   | not DE  |
| EVM0008960 | LG2 | hypothetical protein CISIN_1g | not DE   | not DE   | not DE   | not DE  |
| EVM0007983 | LG2 | hypothetical protein CISIN_1g | not DE   | not DE   | not DE   | not DE  |
| EVM0017233 | LG2 | hypothetical protein CISIN_1g | not DE   | not DE   | not DE   | not DE  |
| EVM0018142 | LG2 | hypothetical protein CISIN_1g | not DE   | not DE   | not DE   | not DE  |
| EVM0008368 | LG2 | hypothetical protein CISIN_1g | not DE   | not DE   | not DE   | not DE  |
| EVM0009314 | LG2 | hypothetical protein CISIN_1g | not DE   | not DE   | not DE   | not DE  |
| EVM0012750 | LG2 | hypothetical protein CISIN_1g | not DE   | not DE   | not DE   | not DE  |
| EVM0012085 | LG2 | hypothetical protein CISIN_1g | not DE   | not DE   | 1.607068 | 0.04984 |
| EVM0015442 | LG2 | hypothetical protein CISIN_1g | not DE   | not DE   | not DE   | not DE  |
| EVM0000293 | LG2 | hypothetical protein CISIN_1g | not DE   | not DE   | not DE   | not DE  |
| EVM0007883 | LG2 | hypothetical protein CISIN_1g | not DE   | not DE   | not DE   | not DE  |

|            |     |                               |          |          |          |         |
|------------|-----|-------------------------------|----------|----------|----------|---------|
| EVM0018641 | LG2 | hypothetical protein CISIN_1g | not DE   | not DE   | not DE   | not DE  |
| EVM0013696 | LG2 | hypothetical protein CISIN_1g | not DE   | not DE   | not DE   | not DE  |
| EVM0014297 | LG2 | hypothetical protein CISIN_1g | -1.59926 | 0.001548 | not DE   | not DE  |
| EVM0014649 | LG2 | hypothetical protein CISIN_1g | not DE   | not DE   | not DE   | not DE  |
| EVM0023452 | LG2 | hypothetical protein CISIN_1g | not DE   | not DE   | not DE   | not DE  |
| EVM0012828 | LG2 | hypothetical protein CISIN_1g | not DE   | not DE   | not DE   | not DE  |
| EVM0017153 | LG2 | hypothetical protein CISIN_1g | not DE   | not DE   | not DE   | not DE  |
| EVM0024357 | LG2 | hypothetical protein CISIN_1g | not DE   | not DE   | not DE   | not DE  |
| EVM0023993 | LG2 | hypothetical protein CISIN_1g | not DE   | not DE   | not DE   | not DE  |
| EVM0002108 | LG2 | hypothetical protein CISIN_1g | not DE   | not DE   | not DE   | not DE  |
| EVM0010308 | LG2 | hypothetical protein CISIN_1g | not DE   | not DE   | not DE   | not DE  |
| EVM0017773 | LG2 | hypothetical protein CISIN_1g | not DE   | not DE   | not DE   | not DE  |
| EVM0006573 | LG2 | hypothetical protein CISIN_1g | not DE   | not DE   | not DE   | not DE  |
| EVM0003877 | LG2 | hypothetical protein CISIN_1g | not DE   | not DE   | not DE   | not DE  |
| EVM0017272 | LG2 | hypothetical protein CISIN_1g | not DE   | not DE   | not DE   | not DE  |
| EVM0019403 | LG2 | hypothetical protein CISIN_1g | not DE   | not DE   | not DE   | not DE  |
| EVM0020812 | LG2 | hypothetical protein CISIN_1g | not DE   | not DE   | not DE   | not DE  |
| EVM0000247 | LG2 | hypothetical protein CISIN_1g | not DE   | not DE   | not DE   | not DE  |
| EVM0017386 | LG2 | hypothetical protein CISIN_1g | not DE   | not DE   | not DE   | not DE  |
| EVM0009302 | LG2 | hypothetical protein CISIN_1g | 1.569296 | 0.000175 | not DE   | not DE  |
| EVM0004988 | LG2 | hypothetical protein CISIN_1g | not DE   | not DE   | not DE   | not DE  |
| EVM0015033 | LG2 | hypothetical protein CISIN_1g | not DE   | not DE   | not DE   | not DE  |
| EVM0003658 | LG2 | hypothetical protein CISIN_1g | not DE   | not DE   | not DE   | not DE  |
| EVM0015094 | LG2 | hypothetical protein CISIN_1g | not DE   | not DE   | not DE   | not DE  |
| EVM0003774 | LG2 | hypothetical protein CISIN_1g | not DE   | not DE   | not DE   | not DE  |
| EVM0017175 | LG2 | hypothetical protein CISIN_1g | not DE   | not DE   | not DE   | not DE  |
| EVM0004832 | LG2 | hypothetical protein CISIN_1g | not DE   | not DE   | not DE   | not DE  |
| EVM0007355 | LG2 | hypothetical protein CISIN_1g | 1.045471 | 0.024796 | not DE   | not DE  |
| EVM0003003 | LG2 | hypothetical protein CISIN_1g | not DE   | not DE   | not DE   | not DE  |
| EVM0004870 | LG2 | hypothetical protein CISIN_1g | not DE   | not DE   | not DE   | not DE  |
| EVM0008764 | LG2 | hypothetical protein CISIN_1g | not DE   | not DE   | not DE   | not DE  |
| EVM0001498 | LG2 | hypothetical protein CISIN_1g | not DE   | not DE   | not DE   | not DE  |
| EVM0013151 | LG2 | hypothetical protein CISIN_1g | not DE   | not DE   | not DE   | not DE  |
| EVM0004745 | LG2 | hypothetical protein CISIN_1g | not DE   | not DE   | not DE   | not DE  |
| EVM0006208 | LG2 | hypothetical protein CISIN_1g | not DE   | not DE   | not DE   | not DE  |
| EVM0022509 | LG2 | hypothetical protein CISIN_1g | not DE   | not DE   | not DE   | not DE  |
| EVM0017258 | LG2 | hypothetical protein CISIN_1g | not DE   | not DE   | not DE   | not DE  |
| EVM0000067 | LG2 | hypothetical protein CISIN_1g | not DE   | not DE   | not DE   | not DE  |
| EVM0008979 | LG2 | hypothetical protein CISIN_1g | not DE   | not DE   | not DE   | not DE  |
| EVM0005720 | LG2 | hypothetical protein CISIN_1g | not DE   | not DE   | not DE   | not DE  |
| EVM0004935 | LG2 | hypothetical protein CISIN_1g | not DE   | not DE   | not DE   | not DE  |
| EVM0002602 | LG2 | hypothetical protein CISIN_1g | not DE   | not DE   | not DE   | not DE  |
| EVM0021311 | LG2 | hypothetical protein CISIN_1g | not DE   | not DE   | not DE   | not DE  |
| EVM0008657 | LG2 | hypothetical protein CISIN_1g | not DE   | not DE   | 1.403368 | 0.01286 |
| EVM0019772 | LG2 | hypothetical protein CISIN_1g | not DE   | not DE   | not DE   | not DE  |
| EVM0020899 | LG2 | hypothetical protein CISIN_1g | not DE   | not DE   | not DE   | not DE  |
| EVM0023242 | LG2 | hypothetical protein CISIN_1g | not DE   | not DE   | not DE   | not DE  |
| EVM0014756 | LG2 | hypothetical protein CISIN_1g | not DE   | not DE   | not DE   | not DE  |
| EVM0011915 | LG2 | hypothetical protein CISIN_1g | not DE   | not DE   | not DE   | not DE  |
| EVM0008117 | LG2 | hypothetical protein CISIN_1g | not DE   | not DE   | not DE   | not DE  |
| EVM0017890 | LG2 | hypothetical protein CISIN_1g | not DE   | not DE   | not DE   | not DE  |
| EVM0000376 | LG2 | hypothetical protein CISIN_1g | not DE   | not DE   | not DE   | not DE  |
| EVM0001635 | LG2 | hypothetical protein CISIN_1g | not DE   | not DE   | not DE   | not DE  |
| EVM0008206 | LG2 | hypothetical protein CISIN_1g | not DE   | not DE   | not DE   | not DE  |



|            |     |                               |          |          |          |         |
|------------|-----|-------------------------------|----------|----------|----------|---------|
| EVM0001130 | LG2 | hypothetical protein CISIN_1g | not DE   | not DE   | not DE   | not DE  |
| EVM0011521 | LG2 | hypothetical protein EUGRSUZ_ | not DE   | not DE   | not DE   | not DE  |
| EVM0008615 | LG2 | hypothetical protein EUGRSUZ_ | not DE   | not DE   | not DE   | not DE  |
| EVM0012158 | LG2 | hypothetical protein EUGRSUZ_ | not DE   | not DE   | 1.526014 | 0.00533 |
| EVM0003565 | LG2 | hypothetical protein EUGRSUZ_ | not DE   | not DE   | not DE   | not DE  |
| EVM0024266 | LG2 | hypothetical protein JCGZ_000 | not DE   | not DE   | not DE   | not DE  |
| EVM0018195 | LG2 | hypothetical protein JCGZ_002 | not DE   | not DE   | not DE   | not DE  |
| EVM0009148 | LG2 | hypothetical protein JCGZ_002 | not DE   | not DE   | not DE   | not DE  |
| EVM0016833 | LG2 | hypothetical protein JCGZ_003 | not DE   | not DE   | not DE   | not DE  |
| EVM0012975 | LG2 | hypothetical protein JCGZ_030 | not DE   | not DE   | not DE   | not DE  |
| EVM0018837 | LG2 | hypothetical protein JCGZ_048 | not DE   | not DE   | not DE   | not DE  |
| EVM0008394 | LG2 | hypothetical protein JCGZ_050 | not DE   | not DE   | not DE   | not DE  |
| EVM0010480 | LG2 | hypothetical protein JCGZ_050 | not DE   | not DE   | not DE   | not DE  |
| EVM0009488 | LG2 | hypothetical protein JCGZ_071 | not DE   | not DE   | not DE   | not DE  |
| EVM0012949 | LG2 | hypothetical protein JCGZ_071 | not DE   | not DE   | not DE   | not DE  |
| EVM0022920 | LG2 | hypothetical protein JCGZ_071 | not DE   | not DE   | not DE   | not DE  |
| EVM0011626 | LG2 | hypothetical protein JCGZ_098 | not DE   | not DE   | not DE   | not DE  |
| EVM0023713 | LG2 | hypothetical protein JCGZ_098 | not DE   | not DE   | not DE   | not DE  |
| EVM0011738 | LG2 | hypothetical protein JCGZ_098 | not DE   | not DE   | not DE   | not DE  |
| EVM0012604 | LG2 | hypothetical protein JCGZ_107 | not DE   | not DE   | not DE   | not DE  |
| EVM0002044 | LG2 | hypothetical protein JCGZ_107 | not DE   | not DE   | not DE   | not DE  |
| EVM0003451 | LG2 | hypothetical protein JCGZ_124 | not DE   | not DE   | not DE   | not DE  |
| EVM0001115 | LG2 | hypothetical protein JCGZ_126 | not DE   | not DE   | -3.6743  | 0.00406 |
| EVM0002705 | LG2 | hypothetical protein JCGZ_126 | not DE   | not DE   | -4.48526 | 0.00647 |
| EVM0013024 | LG2 | hypothetical protein JCGZ_129 | not DE   | not DE   | 2.730389 | 0.00452 |
| EVM0019170 | LG2 | hypothetical protein JCGZ_129 | not DE   | not DE   | not DE   | not DE  |
| EVM0014965 | LG2 | hypothetical protein JCGZ_147 | not DE   | not DE   | not DE   | not DE  |
| EVM0011877 | LG2 | hypothetical protein JCGZ_147 | not DE   | not DE   | 1.254175 | 0.03498 |
| EVM0008805 | LG2 | hypothetical protein JCGZ_150 | not DE   | not DE   | not DE   | not DE  |
| EVM0014050 | LG2 | hypothetical protein JCGZ_151 | not DE   | not DE   | not DE   | not DE  |
| EVM0003880 | LG2 | hypothetical protein JCGZ_154 | not DE   | not DE   | not DE   | not DE  |
| EVM0019163 | LG2 | hypothetical protein JCGZ_163 | not DE   | not DE   | not DE   | not DE  |
| EVM0016387 | LG2 | hypothetical protein JCGZ_163 | not DE   | not DE   | not DE   | not DE  |
| EVM0008999 | LG2 | hypothetical protein JCGZ_163 | not DE   | not DE   | not DE   | not DE  |
| EVM0020122 | LG2 | hypothetical protein JCGZ_163 | not DE   | not DE   | not DE   | not DE  |
| EVM0015747 | LG2 | hypothetical protein JCGZ_169 | not DE   | not DE   | not DE   | not DE  |
| EVM0004721 | LG2 | hypothetical protein JCGZ_172 | not DE   | not DE   | not DE   | not DE  |
| EVM0013032 | LG2 | hypothetical protein JCGZ_187 | not DE   | not DE   | not DE   | not DE  |
| EVM0010262 | LG2 | hypothetical protein JCGZ_187 | not DE   | not DE   | not DE   | not DE  |
| EVM0000434 | LG2 | hypothetical protein JCGZ_195 | not DE   | not DE   | not DE   | not DE  |
| EVM0018065 | LG2 | hypothetical protein JCGZ_267 | not DE   | not DE   | not DE   | not DE  |
| EVM0003809 | LG2 | hypothetical protein JCGZ_267 | not DE   | not DE   | -2.55627 | 0.00232 |
| EVM0005458 | LG2 | hypothetical protein JCGZ_267 | not DE   | not DE   | not DE   | not DE  |
| EVM0015000 | LG2 | hypothetical protein L484_003 | not DE   | not DE   | not DE   | not DE  |
| EVM0008821 | LG2 | hypothetical protein L484_004 | -2.09986 | 9.21E-05 | 1.212091 | 0.00544 |
| EVM0001151 | LG2 | hypothetical protein L484_008 | not DE   | not DE   | not DE   | not DE  |
| EVM0020996 | LG2 | hypothetical protein L484_012 | not DE   | not DE   | not DE   | not DE  |
| EVM0024310 | LG2 | hypothetical protein L484_013 | not DE   | not DE   | not DE   | not DE  |
| EVM0018943 | LG2 | hypothetical protein L484_013 | not DE   | not DE   | not DE   | not DE  |
| EVM0006488 | LG2 | hypothetical protein L484_016 | not DE   | not DE   | not DE   | not DE  |
| EVM0013280 | LG2 | hypothetical protein L484_023 | not DE   | not DE   | not DE   | not DE  |
| EVM0016699 | LG2 | hypothetical protein L484_023 | not DE   | not DE   | not DE   | not DE  |
| EVM0003914 | LG2 | hypothetical protein L484_024 | not DE   | not DE   | not DE   | not DE  |
| EVM0000824 | LG2 | hypothetical protein L484_024 | not DE   | not DE   | not DE   | not DE  |



|            |     |                               |          |          |          |         |
|------------|-----|-------------------------------|----------|----------|----------|---------|
| EVM0021453 | LG2 | hypothetical protein L484_026 | 3.287864 | 0.026297 | not DE   | not DE  |
| EVM0012164 | LG2 | hypothetical protein M569_157 | not DE   | not DE   | not DE   | not DE  |
| EVM0019037 | LG2 | hypothetical protein M569_157 | not DE   | not DE   | not DE   | not DE  |
| EVM0009943 | LG2 | hypothetical protein MIMGU_mg | not DE   | not DE   | not DE   | not DE  |
| EVM0004266 | LG2 | hypothetical protein MIMGU_mg | not DE   | not DE   | not DE   | not DE  |
| EVM0018382 | LG2 | hypothetical protein PHAVU_00 | not DE   | not DE   | not DE   | not DE  |
| EVM0000587 | LG2 | hypothetical protein PHAVU_00 | not DE   | not DE   | not DE   | not DE  |
| EVM0005137 | LG2 | hypothetical protein POPTR_00 | not DE   | not DE   | not DE   | not DE  |
| EVM0018864 | LG2 | hypothetical protein POPTR_00 | not DE   | not DE   | not DE   | not DE  |
| EVM0005065 | LG2 | hypothetical protein POPTR_00 | not DE   | not DE   | not DE   | not DE  |
| EVM0010170 | LG2 | hypothetical protein POPTR_00 | not DE   | not DE   | not DE   | not DE  |
| EVM0000729 | LG2 | hypothetical protein POPTR_00 | not DE   | not DE   | not DE   | not DE  |
| EVM0002913 | LG2 | hypothetical protein POPTR_00 | not DE   | not DE   | not DE   | not DE  |
| EVM0021802 | LG2 | hypothetical protein POPTR_00 | not DE   | not DE   | not DE   | not DE  |
| EVM0002366 | LG2 | hypothetical protein POPTR_00 | not DE   | not DE   | not DE   | not DE  |
| EVM0003659 | LG2 | hypothetical protein POPTR_00 | not DE   | not DE   | not DE   | not DE  |
| EVM0024007 | LG2 | hypothetical protein POPTR_00 | not DE   | not DE   | not DE   | not DE  |
| EVM0008007 | LG2 | hypothetical protein POPTR_00 | not DE   | not DE   | not DE   | not DE  |
| EVM0012541 | LG2 | hypothetical protein POPTR_00 | not DE   | not DE   | not DE   | not DE  |
| EVM0014588 | LG2 | hypothetical protein POPTR_00 | not DE   | not DE   | not DE   | not DE  |
| EVM0018634 | LG2 | hypothetical protein POPTR_00 | not DE   | not DE   | not DE   | not DE  |
| EVM0017115 | LG2 | hypothetical protein POPTR_00 | not DE   | not DE   | 1.674085 | #####   |
| EVM0012668 | LG2 | hypothetical protein POPTR_00 | not DE   | not DE   | 1.301801 | 0.00735 |
| EVM0008962 | LG2 | hypothetical protein POPTR_00 | not DE   | not DE   | not DE   | not DE  |
| EVM0010395 | LG2 | hypothetical protein POPTR_00 | not DE   | not DE   | not DE   | not DE  |
| EVM0021057 | LG2 | hypothetical protein POPTR_00 | not DE   | not DE   | not DE   | not DE  |
| EVM0011410 | LG2 | hypothetical protein POPTR_00 | -2.28096 | 0.033774 | not DE   | not DE  |
| EVM0021047 | LG2 | hypothetical protein POPTR_00 | not DE   | not DE   | not DE   | not DE  |
| EVM0022980 | LG2 | hypothetical protein POPTR_00 | not DE   | not DE   | not DE   | not DE  |
| EVM0018242 | LG2 | hypothetical protein POPTR_00 | not DE   | not DE   | not DE   | not DE  |
| EVM0020570 | LG2 | hypothetical protein POPTR_00 | not DE   | not DE   | not DE   | not DE  |
| EVM0015102 | LG2 | hypothetical protein POPTR_00 | not DE   | not DE   | not DE   | not DE  |
| EVM0006125 | LG2 | hypothetical protein POPTR_00 | not DE   | not DE   | not DE   | not DE  |
| EVM0015883 | LG2 | hypothetical protein POPTR_00 | not DE   | not DE   | not DE   | not DE  |
| EVM0009729 | LG2 | hypothetical protein POPTR_00 | not DE   | not DE   | not DE   | not DE  |
| EVM0005122 | LG2 | hypothetical protein POPTR_00 | not DE   | not DE   | 1.034012 | 0.00089 |
| EVM0014196 | LG2 | hypothetical protein POPTR_01 | not DE   | not DE   | not DE   | not DE  |
| EVM0004849 | LG2 | hypothetical protein PRUPE_pp | not DE   | not DE   | not DE   | not DE  |
| EVM0006358 | LG2 | hypothetical protein PRUPE_pp | not DE   | not DE   | not DE   | not DE  |
| EVM0008167 | LG2 | hypothetical protein PRUPE_pp | not DE   | not DE   | not DE   | not DE  |
| EVM0017490 | LG2 | hypothetical protein PRUPE_pp | not DE   | not DE   | not DE   | not DE  |
| EVM0013097 | LG2 | hypothetical protein PRUPE_pp | not DE   | not DE   | not DE   | not DE  |
| EVM0006394 | LG2 | hypothetical protein PRUPE_pp | not DE   | not DE   | not DE   | not DE  |
| EVM0019053 | LG2 | hypothetical protein PRUPE_pp | 1.292007 | 0.038468 | 1.56489  | 0.00871 |
| EVM0017497 | LG2 | hypothetical protein PRUPE_pp | not DE   | not DE   | not DE   | not DE  |
| EVM0015578 | LG2 | hypothetical protein PRUPE_pp | not DE   | not DE   | not DE   | not DE  |
| EVM0023657 | LG2 | hypothetical protein PRUPE_pp | not DE   | not DE   | not DE   | not DE  |
| EVM0017980 | LG2 | hypothetical protein PRUPE_pp | not DE   | not DE   | not DE   | not DE  |
| EVM0003251 | LG2 | hypothetical protein PRUPE_pp | not DE   | not DE   | not DE   | not DE  |
| EVM0011737 | LG2 | hypothetical protein PRUPE_pp | not DE   | not DE   | not DE   | not DE  |
| EVM0013540 | LG2 | hypothetical protein PRUPE_pp | not DE   | not DE   | not DE   | not DE  |
| EVM0004720 | LG2 | hypothetical protein PRUPE_pp | not DE   | not DE   | not DE   | not DE  |
| EVM0008629 | LG2 | hypothetical protein PRUPE_pp | not DE   | not DE   | not DE   | not DE  |
| EVM0018209 | LG2 | hypothetical protein RCOM_061 | -2.70752 | 0.000867 | not DE   | not DE  |

|            |     |                               |          |          |          |         |
|------------|-----|-------------------------------|----------|----------|----------|---------|
| EVM0006849 | LG2 | hypothetical protein VITISV_C | not DE   | not DE   | not DE   | not DE  |
| EVM0014700 | LG2 | hypothetical protein VITISV_C | not DE   | not DE   | not DE   | not DE  |
| EVM0008452 | LG2 | hypothetical protein VITISV_C | not DE   | not DE   | not DE   | not DE  |
| EVM0007987 | LG2 | hypothetical protein VITISV_C | not DE   | not DE   | not DE   | not DE  |
| EVM0021235 | LG2 | hypothetical protein VITISV_C | not DE   | not DE   | not DE   | not DE  |
| EVM0009676 | LG2 | hypothetical protein VITISV_C | not DE   | not DE   | not DE   | not DE  |
| EVM0001541 | LG2 | hypothetical protein VITISV_C | not DE   | not DE   | not DE   | not DE  |
| EVM0007203 | LG2 | hypothetical protein VITISV_C | not DE   | not DE   | not DE   | not DE  |
| EVM0008000 | LG2 | hypothetical protein VITISV_C | not DE   | not DE   | not DE   | not DE  |
| EVM0003442 | LG2 | hypothetical protein VITISV_C | not DE   | not DE   | not DE   | not DE  |
| EVM0016780 | LG2 | hypothetical protein VITISV_C | not DE   | not DE   | not DE   | not DE  |
| EVM0014859 | LG2 | integral membrane family prot | not DE   | not DE   | not DE   | not DE  |
| EVM0005548 | LG2 | integrase                     | not DE   | not DE   | not DE   | not DE  |
| EVM0013430 | LG2 | kinase family protein         | not DE   | not DE   | not DE   | not DE  |
| EVM0023487 | LG2 | leucine-rich repeat family pr | not DE   | not DE   | -1.12772 | 0.03932 |
| EVM0003461 | LG2 | maternal effect embryo arrest | 3.289577 | 0.000289 | not DE   | not DE  |
| EVM0018988 | LG2 | multicopper oxidase, putative | -1.77237 | 0.000817 | not DE   | not DE  |
| EVM0002204 | LG2 | nodulin family protein        | not DE   | not DE   | not DE   | not DE  |
| EVM0018572 | LG2 | plant defensin                | not DE   | not DE   | not DE   | not DE  |
| EVM0018764 | LG2 | plant defensin                | not DE   | not DE   | not DE   | not DE  |
| EVM0024026 | LG2 | plant defensin                | not DE   | not DE   | not DE   | not DE  |
| EVM0019590 | LG2 | proline-rich family protein   | not DE   | not DE   | not DE   | not DE  |
| EVM0023339 | LG2 | proton-dependent oligopeptide | not DE   | not DE   | not DE   | not DE  |
| EVM0020964 | LG2 | putative E3 ubiquitin-protein | not DE   | not DE   | not DE   | not DE  |
| EVM0015600 | LG2 | putative cinnamyl alcohol deh | not DE   | not DE   | not DE   | not DE  |
| EVM0002862 | LG2 | putative non-specific lipid-t | not DE   | not DE   | not DE   | not DE  |
| EVM0006240 | LG2 | putative plastid-lipid-associ | not DE   | not DE   | not DE   | not DE  |
| EVM0004132 | LG2 | senescence-associated family  | not DE   | not DE   | not DE   | not DE  |
| EVM0007888 | LG2 | serine carboxypeptidase, puta | not DE   | not DE   | not DE   | not DE  |
| EVM0006138 | LG2 | sesquiterpene synthase        | not DE   | not DE   | not DE   | not DE  |
| EVM0015188 | LG2 | sesquiterpene synthase        | not DE   | not DE   | not DE   | not DE  |
| EVM0020863 | LG2 | sesquiterpene synthase        | not DE   | not DE   | not DE   | not DE  |
| EVM0012698 | LG2 | short vegetative phase 2      | not DE   | not DE   | not DE   | not DE  |
| EVM0009623 | LG2 | squalene monooxygenase 3      | not DE   | not DE   | not DE   | not DE  |
| EVM0016006 | LG2 | squalene monooxygenase 3      | not DE   | not DE   | not DE   | not DE  |
| EVM0019260 | LG2 | squalene monooxygenase 3      | not DE   | not DE   | not DE   | not DE  |
| EVM0022539 | LG2 | squalene monooxygenase 3      | not DE   | not DE   | not DE   | not DE  |
| EVM0007211 | LG2 | squalene synthase             | not DE   | not DE   | not DE   | not DE  |
| EVM0012151 | LG2 | squalene synthase             | not DE   | not DE   | not DE   | not DE  |
| EVM0013617 | LG2 | squalene synthase             | not DE   | not DE   | not DE   | not DE  |
| EVM0015469 | LG2 | squalene synthase             | not DE   | not DE   | not DE   | not DE  |
| EVM0016079 | LG2 | squalene synthase             | not DE   | not DE   | not DE   | not DE  |
| EVM0016266 | LG2 | squalene synthase             | not DE   | not DE   | not DE   | not DE  |
| EVM0017090 | LG2 | squalene synthase             | not DE   | not DE   | not DE   | not DE  |
| EVM0021469 | LG2 | squalene synthase             | not DE   | not DE   | not DE   | not DE  |
| EVM0022584 | LG2 | squalene synthase             | not DE   | not DE   | not DE   | not DE  |
| EVM0013320 | LG2 | transposase                   | not DE   | not DE   | not DE   | not DE  |
| EVM0012579 | LG2 | tubulin alpha chain, putative | not DE   | not DE   | not DE   | not DE  |
| EVM0001376 | LG2 | unknown protein               | not DE   | not DE   | not DE   | not DE  |
| EVM0002936 | LG2 | unknown protein               | not DE   | not DE   | not DE   | not DE  |
| EVM0003345 | LG2 | unknown protein               | not DE   | not DE   | 1.33041  | 0.02506 |
| EVM0003524 | LG2 | unknown protein               | not DE   | not DE   | not DE   | not DE  |
| EVM0003850 | LG2 | unknown protein               | not DE   | not DE   | not DE   | not DE  |
| EVM0003851 | LG2 | unknown protein               | not DE   | not DE   | not DE   | not DE  |

|            |     |                              |          |          |          |         |
|------------|-----|------------------------------|----------|----------|----------|---------|
| EVM0004128 | LG2 | unknown protein              | not DE   | not DE   | not DE   | not DE  |
| EVM0005659 | LG2 | unknown protein              | 2.293943 | 0.003796 | not DE   | not DE  |
| EVM0006262 | LG2 | unknown protein              | not DE   | not DE   | not DE   | not DE  |
| EVM0006495 | LG2 | unknown protein              | not DE   | not DE   | not DE   | not DE  |
| EVM0007215 | LG2 | unknown protein              | not DE   | not DE   | not DE   | not DE  |
| EVM0008133 | LG2 | unknown protein              | not DE   | not DE   | not DE   | not DE  |
| EVM0008701 | LG2 | unknown protein              | not DE   | not DE   | not DE   | not DE  |
| EVM0009366 | LG2 | unknown protein              | not DE   | not DE   | not DE   | not DE  |
| EVM0011637 | LG2 | unknown protein              | not DE   | not DE   | not DE   | not DE  |
| EVM0012999 | LG2 | unknown protein              | not DE   | not DE   | not DE   | not DE  |
| EVM0014215 | LG2 | unknown protein              | not DE   | not DE   | not DE   | not DE  |
| EVM0014228 | LG2 | unknown protein              | not DE   | not DE   | not DE   | not DE  |
| EVM0014723 | LG2 | unknown protein              | not DE   | not DE   | not DE   | not DE  |
| EVM0015875 | LG2 | unknown protein              | not DE   | not DE   | not DE   | not DE  |
| EVM0016907 | LG2 | unknown protein              | not DE   | not DE   | not DE   | not DE  |
| EVM0017974 | LG2 | unknown protein              | not DE   | not DE   | not DE   | not DE  |
| EVM0018176 | LG2 | unknown protein              | not DE   | not DE   | not DE   | not DE  |
| EVM0018949 | LG2 | unknown protein              | -2.48274 | 0.032246 | -2.35176 | 0.02437 |
| EVM0019384 | LG2 | unknown protein              | not DE   | not DE   | not DE   | not DE  |
| EVM0019464 | LG2 | unknown protein              | not DE   | not DE   | not DE   | not DE  |
| EVM0020416 | LG2 | unknown protein              | not DE   | not DE   | not DE   | not DE  |
| EVM0020678 | LG2 | unknown protein              | not DE   | not DE   | not DE   | not DE  |
| EVM0020728 | LG2 | unknown protein              | 2.102249 | 0.005805 | 2.85348  | #####   |
| EVM0020730 | LG2 | unknown protein              | not DE   | not DE   | not DE   | not DE  |
| EVM0021378 | LG2 | unknown protein              | not DE   | not DE   | not DE   | not DE  |
| EVM0022272 | LG2 | unknown protein              | not DE   | not DE   | not DE   | not DE  |
| EVM0024627 | LG2 | unknown protein              | not DE   | not DE   | not DE   | not DE  |
| EVM0002592 | LG2 | unnamed protein product      | not DE   | not DE   | 5.241993 | 0.00741 |
| EVM0004340 | LG2 | unnamed protein product      | not DE   | not DE   | not DE   | not DE  |
| EVM0004820 | LG2 | unnamed protein product      | not DE   | not DE   | not DE   | not DE  |
| EVM0005008 | LG2 | unnamed protein product      | not DE   | not DE   | not DE   | not DE  |
| EVM0006979 | LG2 | unnamed protein product      | not DE   | not DE   | not DE   | not DE  |
| EVM0007778 | LG2 | unnamed protein product      | -3.39041 | 0.00121  | not DE   | not DE  |
| EVM0008148 | LG2 | unnamed protein product      | not DE   | not DE   | not DE   | not DE  |
| EVM0008288 | LG2 | unnamed protein product      | not DE   | not DE   | not DE   | not DE  |
| EVM0008455 | LG2 | unnamed protein product      | not DE   | not DE   | not DE   | not DE  |
| EVM0008538 | LG2 | unnamed protein product      | not DE   | not DE   | not DE   | not DE  |
| EVM0009845 | LG2 | unnamed protein product      | not DE   | not DE   | not DE   | not DE  |
| EVM0009866 | LG2 | unnamed protein product      | -3.47975 | 0.04183  | not DE   | not DE  |
| EVM0010085 | LG2 | unnamed protein product      | not DE   | not DE   | not DE   | not DE  |
| EVM0011651 | LG2 | unnamed protein product      | 2.201501 | 0.017999 | not DE   | not DE  |
| EVM0013127 | LG2 | unnamed protein product      | not DE   | not DE   | not DE   | not DE  |
| EVM0014758 | LG2 | unnamed protein product      | not DE   | not DE   | not DE   | not DE  |
| EVM0015490 | LG2 | unnamed protein product      | not DE   | not DE   | not DE   | not DE  |
| EVM0016080 | LG2 | unnamed protein product      | not DE   | not DE   | not DE   | not DE  |
| EVM0017759 | LG2 | unnamed protein product      | not DE   | not DE   | not DE   | not DE  |
| EVM0018744 | LG2 | unnamed protein product      | not DE   | not DE   | not DE   | not DE  |
| EVM0019661 | LG2 | unnamed protein product      | not DE   | not DE   | not DE   | not DE  |
| EVM0020026 | LG2 | unnamed protein product      | not DE   | not DE   | not DE   | not DE  |
| EVM0020842 | LG2 | unnamed protein product      | not DE   | not DE   | not DE   | not DE  |
| EVM0021644 | LG2 | unnamed protein product      | not DE   | not DE   | not DE   | not DE  |
| EVM0022364 | LG2 | unnamed protein product      | not DE   | not DE   | not DE   | not DE  |
| EVM0005730 | LG3 | 1-aminocyclopropane-1-carbox | not DE   | not DE   | 5.325539 | #####   |
| EVM0020898 | LG3 | 1-aminocyclopropane-1-carbox | not DE   | not DE   | not DE   | not DE  |

|            |     |                              |          |          |          |         |
|------------|-----|------------------------------|----------|----------|----------|---------|
| EVM0002958 | LG3 | 2-alkenal reductase (NADP(+) | not DE   | not DE   | not DE   | not DE  |
| EVM0003055 | LG3 | 2-alkenal reductase (NADP(+) | -1.58863 | 0.001258 | not DE   | not DE  |
| EVM0005053 | LG3 | 2-alkenal reductase (NADP(+) | not DE   | not DE   | not DE   | not DE  |
| EVM0006528 | LG3 | 2-alkenal reductase (NADP(+) | not DE   | not DE   | not DE   | not DE  |
| EVM0009466 | LG3 | 2-alkenal reductase (NADP(+) | not DE   | not DE   | not DE   | not DE  |
| EVM0015005 | LG3 | 2-alkenal reductase (NADP(+) | not DE   | not DE   | not DE   | not DE  |
| EVM0024480 | LG3 | 2-alkenal reductase (NADP(+) | not DE   | not DE   | not DE   | not DE  |
| EVM0006605 | LG3 | 29 kDa ribonucleoprotein, ch | not DE   | not DE   | not DE   | not DE  |
| EVM0003762 | LG3 | 3-isopropylmalate dehydratas | not DE   | not DE   | not DE   | not DE  |
| EVM0013003 | LG3 | 30S ribosomal protein S1, ch | not DE   | not DE   | not DE   | not DE  |
| EVM0011815 | LG3 | 30S ribosomal protein S1, ch | not DE   | not DE   | not DE   | not DE  |
| EVM0016371 | LG3 | 36.4 kDa proline-rich protei | not DE   | not DE   | not DE   | not DE  |
| EVM0001515 | LG3 | 3beta-hydroxysteroid-dehydro | not DE   | not DE   | not DE   | not DE  |
| EVM0020343 | LG3 | 40S ribosomal protein S11-li | not DE   | not DE   | not DE   | not DE  |
| EVM0024432 | LG3 | 40S ribosomal protein S18    | not DE   | not DE   | not DE   | not DE  |
| EVM0023775 | LG3 | 50S ribosomal protein L18, c | not DE   | not DE   | not DE   | not DE  |
| EVM0002946 | LG3 | 50S ribosomal protein L18, c | not DE   | not DE   | not DE   | not DE  |
| EVM0003692 | LG3 | 50S ribosomal protein L3-2,  | not DE   | not DE   | not DE   | not DE  |
| EVM0004758 | LG3 | 54S ribosomal protein L39, m | not DE   | not DE   | not DE   | not DE  |
| EVM0008893 | LG3 | 60S ribosomal protein L2, mi | not DE   | not DE   | not DE   | not DE  |
| EVM0009038 | LG3 | 60S ribosomal protein L2, mi | not DE   | not DE   | not DE   | not DE  |
| EVM0010100 | LG3 | 60S ribosomal protein L22-2- | not DE   | not DE   | not DE   | not DE  |
| EVM0024600 | LG3 | 7-hydroxymethyl chlorophyll  | not DE   | not DE   | not DE   | not DE  |
| EVM0006883 | LG3 | ABC transporter C family mem | not DE   | not DE   | not DE   | not DE  |
| EVM0017456 | LG3 | ADP-ribosylation factor-bind | not DE   | not DE   | not DE   | not DE  |
| EVM0010077 | LG3 | ADP-ribosylation factor-like | not DE   | not DE   | not DE   | not DE  |
| EVM0012925 | LG3 | AMSH-like ubiquitin thioeste | not DE   | not DE   | not DE   | not DE  |
| EVM0018945 | LG3 | ARM REPEAT PROTEIN INTERACTI | not DE   | not DE   | not DE   | not DE  |
| EVM0002091 | LG3 | ATP-citrate synthase alpha c | -1.62792 | 0.004721 | not DE   | not DE  |
| EVM0002683 | LG3 | ATP-citrate synthase alpha c | not DE   | not DE   | not DE   | not DE  |
| EVM0019109 | LG3 | ATP-citrate synthase alpha c | not DE   | not DE   | not DE   | not DE  |
| EVM0021942 | LG3 | ATP-citrate synthase alpha c | not DE   | not DE   | not DE   | not DE  |
| EVM0012257 | LG3 | ATP-citrate synthase alpha c | not DE   | not DE   | not DE   | not DE  |
| EVM0008425 | LG3 | ATP-dependent Clp protease p | not DE   | not DE   | not DE   | not DE  |
| EVM0018804 | LG3 | ATP-dependent Clp protease p | not DE   | not DE   | not DE   | not DE  |
| EVM0008514 | LG3 | ATP-dependent DNA helicase C | not DE   | not DE   | not DE   | not DE  |
| EVM0009169 | LG3 | BTB/POZ and MATH domain-cont | not DE   | not DE   | not DE   | not DE  |
| EVM0022878 | LG3 | CAS1 domain-containing prote | not DE   | not DE   | not DE   | not DE  |
| EVM0021017 | LG3 | CASP-like protein 1E2        | not DE   | not DE   | 1.256338 | 0.04619 |
| EVM0021204 | LG3 | CLAVATA3/ESR (CLE)-related p | not DE   | not DE   | not DE   | not DE  |
| EVM0023965 | LG3 | COBRA-like protein 7         | not DE   | not DE   | not DE   | not DE  |
| EVM0018392 | LG3 | CRC domain-containing protei | not DE   | not DE   | not DE   | not DE  |
| EVM0007962 | LG3 | CRIB domain-containing prote | not DE   | not DE   | not DE   | not DE  |
| EVM0014346 | LG3 | CTD small phosphatase-like p | not DE   | not DE   | not DE   | not DE  |
| EVM0017154 | LG3 | DDB1- and CUL4-associated fa | not DE   | not DE   | -1.24822 | #####   |
| EVM0017531 | LG3 | DEAD-box ATP-dependent RNA h | not DE   | not DE   | not DE   | not DE  |
| EVM0007394 | LG3 | DELLA protein GAI1-like      | not DE   | not DE   | not DE   | not DE  |
| EVM0020915 | LG3 | DNA cross-link repair 1A pro | not DE   | not DE   | not DE   | not DE  |
| EVM0003049 | LG3 | DNA polymerase theta-like is | not DE   | not DE   | not DE   | not DE  |
| EVM0019752 | LG3 | DNA repair protein XRCC4-lik | not DE   | not DE   | not DE   | not DE  |
| EVM0009334 | LG3 | DNA replication complex GINS | not DE   | not DE   | not DE   | not DE  |
| EVM0007046 | LG3 | DNA-directed RNA polymerase  | not DE   | not DE   | not DE   | not DE  |
| EVM0024265 | LG3 | DNA-directed RNA polymerase  | not DE   | not DE   | not DE   | not DE  |
| EVM0000383 | LG3 | DNA-directed RNA polymerase  | not DE   | not DE   | not DE   | not DE  |

|            |     |                              |          |          |          |        |
|------------|-----|------------------------------|----------|----------|----------|--------|
| EVM0012186 | LG3 | DNA-directed RNA polymerase  | not DE   | not DE   | not DE   | not DE |
| EVM0000506 | LG3 | DNA-directed RNA polymerases | not DE   | not DE   | not DE   | not DE |
| EVM0012394 | LG3 | DNA-directed RNA polymerases | not DE   | not DE   | not DE   | not DE |
| EVM0008938 | LG3 | DUF21 domain-containing prot | not DE   | not DE   | not DE   | not DE |
| EVM0018831 | LG3 | E3 ubiquitin protein ligase  | not DE   | not DE   | not DE   | not DE |
| EVM0009482 | LG3 | E3 ubiquitin-protein ligase  | not DE   | not DE   | not DE   | not DE |
| EVM0003008 | LG3 | E3 ubiquitin-protein ligase  | not DE   | not DE   | not DE   | not DE |
| EVM0021385 | LG3 | E3 ubiquitin-protein ligase  | not DE   | not DE   | not DE   | not DE |
| EVM0002493 | LG3 | EG45-like domain containing  | not DE   | not DE   | not DE   | not DE |
| EVM0013446 | LG3 | ER lumen protein retaining r | not DE   | not DE   | not DE   | not DE |
| EVM0011562 | LG3 | ER membrane protein complex  | not DE   | not DE   | not DE   | not DE |
| EVM0003359 | LG3 | F-box protein AFR-like       | not DE   | not DE   | not DE   | not DE |
| EVM0018660 | LG3 | F-box protein CPR30-like     | not DE   | not DE   | not DE   | not DE |
| EVM0015540 | LG3 | F-box protein PP2-B15-like   | not DE   | not DE   | not DE   | not DE |
| EVM0007925 | LG3 | F-box/LRR-repeat protein 4-l | not DE   | not DE   | not DE   | not DE |
| EVM0006461 | LG3 | F-box/ankyrin repeat protein | not DE   | not DE   | not DE   | not DE |
| EVM0012102 | LG3 | F-box/kelch-repeat protein A | not DE   | not DE   | not DE   | not DE |
| EVM0000952 | LG3 | F-box/kelch-repeat protein A | not DE   | not DE   | not DE   | not DE |
| EVM0024290 | LG3 | F-box/kelch-repeat protein A | not DE   | not DE   | not DE   | not DE |
| EVM0000356 | LG3 | FRIGIDA-like protein 4a-like | not DE   | not DE   | not DE   | not DE |
| EVM0004547 | LG3 | Fanconi anemia group I prote | not DE   | not DE   | not DE   | not DE |
| EVM0022914 | LG3 | GDT1-like protein 2, chlorop | not DE   | not DE   | not DE   | not DE |
| EVM0023251 | LG3 | Golgi apparatus membrane pro | not DE   | not DE   | not DE   | not DE |
| EVM0013711 | LG3 | HBS1-like protein-like isofo | not DE   | not DE   | not DE   | not DE |
| EVM0018639 | LG3 | L-arabinokinase-like isoform | not DE   | not DE   | -1.9227  | #####  |
| EVM0013082 | LG3 | L-gulonolactone oxidase      | not DE   | not DE   | not DE   | not DE |
| EVM0007908 | LG3 | LOW QUALITY PROTEIN: 1-Cys p | not DE   | not DE   | not DE   | not DE |
| EVM0006026 | LG3 | LOW QUALITY PROTEIN: 1-amino | not DE   | not DE   | not DE   | not DE |
| EVM0002228 | LG3 | LOW QUALITY PROTEIN: DNA pol | not DE   | not DE   | not DE   | not DE |
| EVM0008276 | LG3 | LOW QUALITY PROTEIN: DNA rep | not DE   | not DE   | not DE   | not DE |
| EVM0011748 | LG3 | LOW QUALITY PROTEIN: GTPase- | not DE   | not DE   | not DE   | not DE |
| EVM0013894 | LG3 | LOW QUALITY PROTEIN: GTPase- | not DE   | not DE   | not DE   | not DE |
| EVM0009108 | LG3 | LOW QUALITY PROTEIN: unchara | not DE   | not DE   | not DE   | not DE |
| EVM0009413 | LG3 | LOW QUALITY PROTEIN: vacuole | not DE   | not DE   | not DE   | not DE |
| EVM0019923 | LG3 | LRR receptor-like serine/thr | -2.78017 | 0.009032 | not DE   | not DE |
| EVM0005838 | LG3 | LRR receptor-like serine/thr | not DE   | not DE   | not DE   | not DE |
| EVM0015415 | LG3 | MATH domain-containing prote | 1.124057 | 0.002298 | not DE   | not DE |
| EVM0017896 | LG3 | MLO-like protein 1-like      | not DE   | not DE   | not DE   | not DE |
| EVM0023289 | LG3 | MLO-like protein 1-like      | not DE   | not DE   | not DE   | not DE |
| EVM0003399 | LG3 | NAC transcription factor 25- | not DE   | not DE   | not DE   | not DE |
| EVM0004844 | LG3 | NAC transcription factor 25- | not DE   | not DE   | not DE   | not DE |
| EVM0005422 | LG3 | NAC transcription factor 25- | not DE   | not DE   | not DE   | not DE |
| EVM0010722 | LG3 | NAC transcription factor 25- | not DE   | not DE   | not DE   | not DE |
| EVM0014570 | LG3 | NAC transcription factor 25- | not DE   | not DE   | not DE   | not DE |
| EVM0021022 | LG3 | NAC transcription factor 25- | not DE   | not DE   | not DE   | not DE |
| EVM0021739 | LG3 | NADH dehydrogenase           | not DE   | not DE   | not DE   | not DE |
| EVM0006987 | LG3 | NEDD8-activating enzyme E1 c | not DE   | not DE   | not DE   | not DE |
| EVM0018086 | LG3 | NIPA-like protein 2-like     | not DE   | not DE   | not DE   | not DE |
| EVM0017373 | LG3 | PHD finger-like domain-conta | not DE   | not DE   | not DE   | not DE |
| EVM0007540 | LG3 | REF/SRPP-like protein At3g05 | not DE   | not DE   | not DE   | not DE |
| EVM0012844 | LG3 | RING-H2 finger protein ATL45 | 1.253525 | 0.00066  | 1.605791 | #####  |
| EVM0002036 | LG3 | RNA polymerase-associated pr | not DE   | not DE   | not DE   | not DE |
| EVM0019014 | LG3 | RNA pseudouridine synthase l | not DE   | not DE   | not DE   | not DE |
| EVM0021888 | LG3 | RPM1-interacting protein 4-l | not DE   | not DE   | not DE   | not DE |

|            |     |                               |          |          |          |         |
|------------|-----|-------------------------------|----------|----------|----------|---------|
| EVM0007428 | LG3 | SART-1 family protein DOT2    | not DE   | not DE   | not DE   | not DE  |
| EVM0005002 | LG3 | SWR1-complex protein 4-like   | not DE   | not DE   | not DE   | not DE  |
| EVM0022003 | LG3 | U-box domain-containing prot  | not DE   | not DE   | not DE   | not DE  |
| EVM0001175 | LG3 | U-box domain-containing prot  | not DE   | not DE   | not DE   | not DE  |
| EVM0001137 | LG3 | U-box domain-containing prot  | not DE   | not DE   | not DE   | not DE  |
| EVM0009674 | LG3 | U1 small nuclear ribonucleop  | not DE   | not DE   | not DE   | not DE  |
| EVM0014979 | LG3 | U5 small nuclear ribonucleop  | not DE   | not DE   | not DE   | not DE  |
| EVM0017766 | LG3 | U6 snRNA-associated Sm-like   | not DE   | not DE   | not DE   | not DE  |
| EVM0009138 | LG3 | UBX domain-containing protei  | not DE   | not DE   | not DE   | not DE  |
| EVM0023620 | LG3 | UDP-glucuronate 4-epimerase   | -1.18767 | 0.043697 | not DE   | not DE  |
| EVM0016155 | LG3 | UDP-glucuronic acid decarbox  | not DE   | not DE   | not DE   | not DE  |
| EVM0010167 | LG3 | UDP-glycosyltransferase 73C3  | not DE   | not DE   | not DE   | not DE  |
| EVM0013179 | LG3 | UDP-glycosyltransferase 73C3  | not DE   | not DE   | not DE   | not DE  |
| EVM0000941 | LG3 | UDP-glycosyltransferase 74E2  | -1.65255 | 0.003049 | not DE   | not DE  |
| EVM0005883 | LG3 | UDP-glycosyltransferase 74F2  | not DE   | not DE   | not DE   | not DE  |
| EVM0011461 | LG3 | UDP-glycosyltransferase 74F2  | not DE   | not DE   | not DE   | not DE  |
| EVM0020660 | LG3 | UDP-glycosyltransferase 74F2  | not DE   | not DE   | not DE   | not DE  |
| EVM0002733 | LG3 | UDP-glycosyltransferase 83A1  | not DE   | not DE   | not DE   | not DE  |
| EVM0012968 | LG3 | UDP-glycosyltransferase 83A1  | not DE   | not DE   | not DE   | not DE  |
| EVM0005958 | LG3 | UV radiation resistance-assoc | not DE   | not DE   | not DE   | not DE  |
| EVM0022694 | LG3 | V-type proton ATPase subunit  | not DE   | not DE   | not DE   | not DE  |
| EVM0010644 | LG3 | acetyl-CoA-benzylalcohol ace  | not DE   | not DE   | not DE   | not DE  |
| EVM0016356 | LG3 | actin-related protein 2/3 co  | not DE   | not DE   | not DE   | not DE  |
| EVM0011990 | LG3 | acyl-CoA-binding domain-cont  | not DE   | not DE   | not DE   | not DE  |
| EVM0003315 | LG3 | acyl-CoA-binding domain-cont  | not DE   | not DE   | not DE   | not DE  |
| EVM0012846 | LG3 | acyl-[acyl-carrier-protein]   | -1.1206  | 0.030443 | not DE   | not DE  |
| EVM0023103 | LG3 | acyl-[acyl-carrier-protein]   | not DE   | not DE   | not DE   | not DE  |
| EVM0012029 | LG3 | acyl-coenzyme A thioesterase  | not DE   | not DE   | not DE   | not DE  |
| EVM0003023 | LG3 | acyl-protein thioesterase 2   | not DE   | not DE   | not DE   | not DE  |
| EVM0015741 | LG3 | adrenodoxin-like protein, mi  | not DE   | not DE   | not DE   | not DE  |
| EVM0006204 | LG3 | alkaline ceramidase 3-like    | not DE   | not DE   | not DE   | not DE  |
| EVM0012773 | LG3 | alpha-aminoadipic semialdehy  | 2.126878 | 0.00681  | not DE   | not DE  |
| EVM0018166 | LG3 | alpha-ketoglutarate-dependen  | not DE   | not DE   | not DE   | not DE  |
| EVM0010660 | LG3 | amino acid permease 8-like    | not DE   | not DE   | not DE   | not DE  |
| EVM0022218 | LG3 | ammonium transporter 1 membe  | not DE   | not DE   | not DE   | not DE  |
| EVM0006890 | LG3 | ammonium transporter 3 membe  | not DE   | not DE   | not DE   | not DE  |
| EVM0007131 | LG3 | anaphase-promoting complex s  | not DE   | not DE   | not DE   | not DE  |
| EVM0003718 | LG3 | anaphase-promoting complex s  | not DE   | not DE   | not DE   | not DE  |
| EVM0002982 | LG3 | ankyrin repeat domain-contain | not DE   | not DE   | not DE   | not DE  |
| EVM0008794 | LG3 | ankyrin repeat-containing pr  | not DE   | not DE   | not DE   | not DE  |
| EVM0021885 | LG3 | ankyrin repeat-containing pr  | not DE   | not DE   | not DE   | not DE  |
| EVM0016224 | LG3 | ankyrin repeat-containing pr  | not DE   | not DE   | not DE   | not DE  |
| EVM0011542 | LG3 | aspartate aminotransferase 3  | 2.592205 | 0.001355 | not DE   | not DE  |
| EVM0005492 | LG3 | aspartate aminotransferase,   | not DE   | not DE   | not DE   | not DE  |
| EVM0000554 | LG3 | aspartic proteinase CDR1-like | not DE   | not DE   | not DE   | not DE  |
| EVM0012455 | LG3 | auxin-induced protein 22D     | -2.38616 | 0.045473 | not DE   | not DE  |
| EVM0019437 | LG3 | auxin-responsive protein IAA  | not DE   | not DE   | not DE   | not DE  |
| EVM0010351 | LG3 | auxin-responsive protein IAA  | not DE   | not DE   | not DE   | not DE  |
| EVM0000706 | LG3 | basic 7S globulin-like        | not DE   | not DE   | not DE   | not DE  |
| EVM0012554 | LG3 | basic leucine zipper 9-like   | not DE   | not DE   | not DE   | not DE  |
| EVM0022245 | LG3 | bifunctional epoxide hydrola  | 1.006811 | 0.048081 | 1.250921 | 0.00557 |
| EVM0014536 | LG3 | bifunctional purple acid pho  | not DE   | not DE   | not DE   | not DE  |
| EVM0020547 | LG3 | boron transporter 4           | not DE   | not DE   | not DE   | not DE  |
| EVM0001554 | LG3 | branched-chain-amino-acid am  | not DE   | not DE   | not DE   | not DE  |

|            |     |                                |        |        |          |         |
|------------|-----|--------------------------------|--------|--------|----------|---------|
| EVM0017047 | LG3 | brefeldin A-inhibited guanin   | not DE | not DE | -1.27996 | #####   |
| EVM0008858 | LG3 | bromodomain and WD repeat-co   | not DE | not DE | not DE   | not DE  |
| EVM0014748 | LG3 | caffeoylshikimate esterase-l   | not DE | not DE | not DE   | not DE  |
| EVM0015372 | LG3 | calcium homeostasis endoplas   | not DE | not DE | -1.1954  | #####   |
| EVM0007993 | LG3 | calcium-dependent protein kin  | not DE | not DE | not DE   | not DE  |
| EVM0000421 | LG3 | calmodulin-4                   | not DE | not DE | not DE   | not DE  |
| EVM0006436 | LG3 | calmodulin-binding transcrip   | not DE | not DE | not DE   | not DE  |
| EVM0015956 | LG3 | calmodulin-like protein 11-l   | not DE | not DE | not DE   | not DE  |
| EVM0008974 | LG3 | calmodulin-like protein 3      | not DE | not DE | not DE   | not DE  |
| EVM0009490 | LG3 | carbon catabolite repressor    | not DE | not DE | not DE   | not DE  |
| EVM0003379 | LG3 | carotenoid 9,10(9&apos;;10&a   | not DE | not DE | not DE   | not DE  |
| EVM0020438 | LG3 | carotenoid 9,10(9&apos;;10&a   | not DE | not DE | not DE   | not DE  |
| EVM0014353 | LG3 | casein kinase I isoform delt   | not DE | not DE | not DE   | not DE  |
| EVM0023375 | LG3 | cation transport regulator-l   | not DE | not DE | not DE   | not DE  |
| EVM0015771 | LG3 | cation/H(+) antiporter 19      | not DE | not DE | not DE   | not DE  |
| EVM0002876 | LG3 | cellulose synthase-like prot   | not DE | not DE | not DE   | not DE  |
| EVM0008948 | LG3 | cellulose synthase-like prot   | not DE | not DE | not DE   | not DE  |
| EVM0015227 | LG3 | chaperonin CPN60-2, mitochon   | not DE | not DE | -1.81815 | #####   |
| EVM0007517 | LG3 | chitinase-like protein 2-lik   | not DE | not DE | not DE   | not DE  |
| EVM0005208 | LG3 | chitotriosidase-1-like         | not DE | not DE | not DE   | not DE  |
| EVM0006395 | LG3 | chloride channel protein CLC   | not DE | not DE | not DE   | not DE  |
| EVM0019687 | LG3 | chlorophyll a-b binding prot   | not DE | not DE | not DE   | not DE  |
| EVM0014544 | LG3 | chloroplastic group IIA intr   | not DE | not DE | not DE   | not DE  |
| EVM0022335 | LG3 | chromatin modification-relat   | not DE | not DE | not DE   | not DE  |
| EVM0001093 | LG3 | chromatin structure-remodeli   | not DE | not DE | not DE   | not DE  |
| EVM0022885 | LG3 | chromatin structure-remodeli   | not DE | not DE | not DE   | not DE  |
| EVM0010476 | LG3 | chromosome transmission fide   | not DE | not DE | not DE   | not DE  |
| EVM0018252 | LG3 | classical arabinogalactan pr   | not DE | not DE | not DE   | not DE  |
| EVM0012736 | LG3 | coiled-coil domain-containin   | not DE | not DE | not DE   | not DE  |
| EVM0024397 | LG3 | coiled-coil domain-containin   | not DE | not DE | not DE   | not DE  |
| EVM0016659 | LG3 | conserved oligomeric Golgi c   | not DE | not DE | not DE   | not DE  |
| EVM0013074 | LG3 | craniofacial development pro   | not DE | not DE | not DE   | not DE  |
| EVM0018397 | LG3 | crocetin glucosyltransferase   | not DE | not DE | not DE   | not DE  |
| EVM0021868 | LG3 | crocetin glucosyltransferase   | not DE | not DE | -1.26599 | 0.02804 |
| EVM0008762 | LG3 | cryptochrome DASH, chloropl    | not DE | not DE | not DE   | not DE  |
| EVM0004793 | LG3 | cyanate hydratase-like         | not DE | not DE | not DE   | not DE  |
| EVM0011011 | LG3 | cyanate hydratase-like         | not DE | not DE | not DE   | not DE  |
| EVM0018996 | LG3 | cyclin-A2-1-like               | not DE | not DE | not DE   | not DE  |
| EVM0012453 | LG3 | cyclin-dependent kinase inhi   | not DE | not DE | not DE   | not DE  |
| EVM0023417 | LG3 | cytochrome b-c1 complex subu   | not DE | not DE | not DE   | not DE  |
| EVM0014470 | LG3 | cytokinesis protein sepA-lik   | not DE | not DE | not DE   | not DE  |
| EVM0002672 | LG3 | deSI-like protein At4g17486    | not DE | not DE | not DE   | not DE  |
| EVM0009286 | LG3 | dehydration-responsive prote   | not DE | not DE | not DE   | not DE  |
| EVM0004817 | LG3 | derlin-1                       | not DE | not DE | not DE   | not DE  |
| EVM0006662 | LG3 | dihydrolipoyl dehydrogenase    | not DE | not DE | not DE   | not DE  |
| EVM0015794 | LG3 | diphthamide biosynthesis pro   | not DE | not DE | not DE   | not DE  |
| EVM0006868 | LG3 | disease resistance protein A   | not DE | not DE | not DE   | not DE  |
| EVM0001520 | LG3 | divinyl chlorophyllide a 8-v   | not DE | not DE | not DE   | not DE  |
| EVM0021058 | LG3 | double-stranded RNA-binding    | not DE | not DE | not DE   | not DE  |
| EVM0020470 | LG3 | dual specificity protein kin   | not DE | not DE | not DE   | not DE  |
| EVM0016927 | LG3 | dymeclin-like isoform X2       | not DE | not DE | not DE   | not DE  |
| EVM0019952 | LG3 | dynamamin-related protein 3A-l | not DE | not DE | not DE   | not DE  |
| EVM0003844 | LG3 | early nodulin-93-like          | not DE | not DE | not DE   | not DE  |
| EVM0005337 | LG3 | early nodulin-like protein 3   | not DE | not DE | not DE   | not DE  |

|            |     |                                          |          |          |          |         |
|------------|-----|------------------------------------------|----------|----------|----------|---------|
| EVM0002819 | LG3 | egg cell-secreted protein 1.             | not DE   | not DE   | not DE   | not DE  |
| EVM0018969 | LG3 | electron transfer flavoprotein           | not DE   | not DE   | not DE   | not DE  |
| EVM0020114 | LG3 | endo-1,3;1,4-beta-D-glucanase            | not DE   | not DE   | not DE   | not DE  |
| EVM0004845 | LG3 | endoglucanase 16-like                    | not DE   | not DE   | not DE   | not DE  |
| EVM0010921 | LG3 | endonuclease III homolog 1,              | not DE   | not DE   | not DE   | not DE  |
| EVM0016446 | LG3 | endoribonuclease Dicer homolog           | not DE   | not DE   | not DE   | not DE  |
| EVM0018910 | LG3 | enhancer of rudimentary homology         | not DE   | not DE   | not DE   | not DE  |
| EVM0020387 | LG3 | enhancer of rudimentary homology         | not DE   | not DE   | not DE   | not DE  |
| EVM0018243 | LG3 | enolase-phosphatase E1-like              | not DE   | not DE   | not DE   | not DE  |
| EVM0022385 | LG3 | enoyl-CoA hydratase domain-containing    | not DE   | not DE   | not DE   | not DE  |
| EVM0000338 | LG3 | ethylene-responsive transcription factor | not DE   | not DE   | -4.59712 | #####   |
| EVM0011042 | LG3 | ethylene-responsive transcription factor | not DE   | not DE   | not DE   | not DE  |
| EVM0008114 | LG3 | eukaryotic initiation factor 4E          | not DE   | not DE   | not DE   | not DE  |
| EVM0022273 | LG3 | eukaryotic translation initiation factor | not DE   | not DE   | not DE   | not DE  |
| EVM0007629 | LG3 | eukaryotic translation initiation factor | not DE   | not DE   | not DE   | not DE  |
| EVM0024109 | LG3 | exopolygalacturonase-like                | not DE   | not DE   | not DE   | not DE  |
| EVM0023034 | LG3 | exosome complex exonuclease              | not DE   | not DE   | not DE   | not DE  |
| EVM0009284 | LG3 | extensin-3-like, partial                 | not DE   | not DE   | -2.2692  | 0.03186 |
| EVM0022628 | LG3 | flavonol synthase/flavanone synthase     | not DE   | not DE   | not DE   | not DE  |
| EVM0016600 | LG3 | flotillin-like protein 4                 | not DE   | not DE   | not DE   | not DE  |
| EVM0024192 | LG3 | flowering-promoting factor 1             | not DE   | not DE   | not DE   | not DE  |
| EVM0015053 | LG3 | flowering-promoting factor 1             | not DE   | not DE   | not DE   | not DE  |
| EVM0007566 | LG3 | folate-biopterin transporter             | not DE   | not DE   | not DE   | not DE  |
| EVM0019648 | LG3 | formin-like protein 2-like               | not DE   | not DE   | not DE   | not DE  |
| EVM0013274 | LG3 | galactokinase                            | not DE   | not DE   | not DE   | not DE  |
| EVM0000584 | LG3 | gamma-secretase subunit APH1             | not DE   | not DE   | not DE   | not DE  |
| EVM0001122 | LG3 | general transcription factor             | not DE   | not DE   | not DE   | not DE  |
| EVM0015890 | LG3 | gibberellin-regulated protein 1          | not DE   | not DE   | not DE   | not DE  |
| EVM0017319 | LG3 | gibberellin-regulated protein 1          | not DE   | not DE   | not DE   | not DE  |
| EVM0009173 | LG3 | glucan endo-1,3-beta-glucosidase         | not DE   | not DE   | not DE   | not DE  |
| EVM0006997 | LG3 | glucan endo-1,3-beta-glucosidase         | not DE   | not DE   | not DE   | not DE  |
| EVM0011220 | LG3 | glucose-1-phosphate adenylylase          | -1.34082 | 0.021961 | not DE   | not DE  |
| EVM0015967 | LG3 | glucose-1-phosphate adenylylase          | not DE   | not DE   | not DE   | not DE  |
| EVM0019618 | LG3 | glucose-6-phosphate 1-dehydrogenase      | not DE   | not DE   | not DE   | not DE  |
| EVM0023715 | LG3 | haloacid dehalogenase-like               | not DE   | not DE   | not DE   | not DE  |
| EVM0023941 | LG3 | heat stress transcription factor         | not DE   | not DE   | not DE   | not DE  |
| EVM0019635 | LG3 | heparanase-like protein 3-like           | not DE   | not DE   | not DE   | not DE  |
| EVM0011817 | LG3 | hepatocyte growth factor-regulated       | not DE   | not DE   | not DE   | not DE  |
| EVM0006753 | LG3 | high mobility group B protein            | not DE   | not DE   | not DE   | not DE  |
| EVM0020480 | LG3 | histidine kinase CKII-like               | not DE   | not DE   | not DE   | not DE  |
| EVM0021200 | LG3 | histidine kinase CKII-like               | not DE   | not DE   | not DE   | not DE  |
| EVM0004491 | LG3 | histidine protein methyltransferase      | not DE   | not DE   | not DE   | not DE  |
| EVM0008682 | LG3 | histidine protein methyltransferase      | not DE   | not DE   | not DE   | not DE  |
| EVM0010047 | LG3 | histidine protein methyltransferase      | not DE   | not DE   | not DE   | not DE  |
| EVM0000103 | LG3 | histidine-containing phosphotransferase  | not DE   | not DE   | not DE   | not DE  |
| EVM0009154 | LG3 | histone-lysine N-methyltransferase       | not DE   | not DE   | not DE   | not DE  |
| EVM0021452 | LG3 | homeobox protein knotted-1-like          | not DE   | not DE   | not DE   | not DE  |
| EVM0016126 | LG3 | hydroxyethylthiazole kinase              | not DE   | not DE   | not DE   | not DE  |
| EVM0017466 | LG3 | importin subunit alpha-1 isoform         | not DE   | not DE   | not DE   | not DE  |
| EVM0003409 | LG3 | inorganic phosphate transporter          | not DE   | not DE   | not DE   | not DE  |
| EVM0016779 | LG3 | inorganic phosphate transporter          | -1.87105 | 0.001098 | not DE   | not DE  |
| EVM0019247 | LG3 | inositol-tetrakisphosphate 1-kinase      | not DE   | not DE   | not DE   | not DE  |
| EVM0016024 | LG3 | isoleucine--tRNA ligase, cytosolic       | not DE   | not DE   | not DE   | not DE  |
| EVM0018185 | LG3 | kinesin-like protein KIF11-A             | not DE   | not DE   | not DE   | not DE  |



|            |     |                              |          |          |          |        |
|------------|-----|------------------------------|----------|----------|----------|--------|
| EVM0009421 | LG3 | kinesin-like protein KIN12B- | not DE   | not DE   | not DE   | not DE |
| EVM0002607 | LG3 | kinesin-like protein NACK2-l | not DE   | not DE   | not DE   | not DE |
| EVM0007347 | LG3 | lachrymatory-factor synthase | -1.49135 | 0.039816 | not DE   | not DE |
| EVM0017074 | LG3 | lachrymatory-factor synthase | not DE   | not DE   | not DE   | not DE |
| EVM0012826 | LG3 | lactation elevated protein l | not DE   | not DE   | not DE   | not DE |
| EVM0002551 | LG3 | lactoylglutathione lyase-lik | not DE   | not DE   | not DE   | not DE |
| EVM0002605 | LG3 | late embryogenesis abundant  | not DE   | not DE   | not DE   | not DE |
| EVM0019404 | LG3 | late embryogenesis abundant  | not DE   | not DE   | not DE   | not DE |
| EVM0000555 | LG3 | late embryogenesis abundant  | not DE   | not DE   | not DE   | not DE |
| EVM0002290 | LG3 | lateral signaling target pro | 1.340914 | 0.006481 | not DE   | not DE |
| EVM0013035 | LG3 | leucine-rich repeat extensin | not DE   | not DE   | not DE   | not DE |
| EVM0008057 | LG3 | leucine-rich repeat extensin | not DE   | not DE   | not DE   | not DE |
| EVM0014191 | LG3 | leucine-rich repeat extensin | not DE   | not DE   | not DE   | not DE |
| EVM0022562 | LG3 | lipoamide acyltransferase co | not DE   | not DE   | not DE   | not DE |
| EVM0020150 | LG3 | lon protease homolog 1, mito | not DE   | not DE   | -1.44401 | #####  |
| EVM0019432 | LG3 | luminal-binding protein 4-li | -3.74826 | 6.45E-09 | -4.27028 | #####  |
| EVM0002110 | LG3 | lysM domain receptor-like ki | not DE   | not DE   | not DE   | not DE |
| EVM0023308 | LG3 | lysine-specific demethylase  | -1.84193 | 0.000319 | not DE   | not DE |
| EVM0021192 | LG3 | major allergen Pru ar 1      | -3.81115 | 7.75E-05 | not DE   | not DE |
| EVM0011103 | LG3 | major allergen Pru ar 1-like | not DE   | not DE   | not DE   | not DE |
| EVM0014957 | LG3 | major pollen allergen Bet v  | not DE   | not DE   | not DE   | not DE |
| EVM0014350 | LG3 | mechanosensitive ion channel | not DE   | not DE   | not DE   | not DE |
| EVM0020316 | LG3 | mechanosensitive ion channel | not DE   | not DE   | not DE   | not DE |
| EVM0014105 | LG3 | meiotic recombination protei | not DE   | not DE   | not DE   | not DE |
| EVM0000249 | LG3 | membrane-associated 30 kDa p | not DE   | not DE   | not DE   | not DE |
| EVM0001839 | LG3 | membrane-associated 30 kDa p | not DE   | not DE   | not DE   | not DE |
| EVM0003102 | LG3 | methylenetetrahydrofolate re | not DE   | not DE   | not DE   | not DE |
| EVM0014742 | LG3 | methyltransferase-like prote | not DE   | not DE   | not DE   | not DE |
| EVM0024523 | LG3 | mitogen-activated protein ki | not DE   | not DE   | not DE   | not DE |
| EVM0007172 | LG3 | monothiol glutaredoxin-S10   | not DE   | not DE   | not DE   | not DE |
| EVM0019442 | LG3 | myb family transcription fac | not DE   | not DE   | not DE   | not DE |
| EVM0003265 | LG3 | myb-related protein 308-like | not DE   | not DE   | not DE   | not DE |
| EVM0008486 | LG3 | myb-related protein 308-like | -4.47379 | 3.90E-05 | not DE   | not DE |
| EVM0015447 | LG3 | myb-related protein Myb4-lik | not DE   | not DE   | not DE   | not DE |
| EVM0001012 | LG3 | myosin-6 isoform X2          | not DE   | not DE   | not DE   | not DE |
| EVM0013808 | LG3 | myosin-6-like                | not DE   | not DE   | not DE   | not DE |
| EVM0001582 | LG3 | neurochondrin-like           | not DE   | not DE   | not DE   | not DE |
| EVM0014524 | LG3 | non-lysosomal glucosylcerami | not DE   | not DE   | not DE   | not DE |
| EVM0015661 | LG3 | nuclear export mediator fact | not DE   | not DE   | not DE   | not DE |
| EVM0013815 | LG3 | nuclear factor 7, brain-like | not DE   | not DE   | not DE   | not DE |
| EVM0008222 | LG3 | nuclear nucleic acid-binding | not DE   | not DE   | not DE   | not DE |
| EVM0009584 | LG3 | nuclear pore complex protein | not DE   | not DE   | not DE   | not DE |
| EVM0003776 | LG3 | nuclear pore complex protein | 1.944031 | 0.032036 | not DE   | not DE |
| EVM0009574 | LG3 | nucleoprotein TPR-like isof  | not DE   | not DE   | not DE   | not DE |
| EVM0019654 | LG3 | omega-amidase, chloroplastic | not DE   | not DE   | not DE   | not DE |
| EVM0001555 | LG3 | outer envelope pore protein  | not DE   | not DE   | not DE   | not DE |
| EVM0018758 | LG3 | paired amphipathic helix pro | not DE   | not DE   | not DE   | not DE |
| EVM0023605 | LG3 | pathogen-related protein-lik | not DE   | not DE   | not DE   | not DE |
| EVM0004893 | LG3 | pathogenesis-related protein | not DE   | not DE   | not DE   | not DE |
| EVM0013649 | LG3 | pathogenesis-related protein | not DE   | not DE   | not DE   | not DE |
| EVM0019987 | LG3 | pathogenesis-related protein | not DE   | not DE   | not DE   | not DE |
| EVM0021709 | LG3 | pathogenesis-related protein | not DE   | not DE   | not DE   | not DE |
| EVM0021884 | LG3 | pectinesterase inhibitor-lik | not DE   | not DE   | not DE   | not DE |
| EVM0003495 | LG3 | pectinesterase-like          | not DE   | not DE   | not DE   | not DE |

|            |     |                              |          |          |          |         |
|------------|-----|------------------------------|----------|----------|----------|---------|
| EVM0013798 | LG3 | pectinesterase/pectinesteras | not DE   | not DE   | not DE   | not DE  |
| EVM0002708 | LG3 | pelargonidin 3-O-(6-caffeoyl | not DE   | not DE   | not DE   | not DE  |
| EVM0009728 | LG3 | pentatricopeptide repeat-con | 1.726842 | 0.020045 | not DE   | not DE  |
| EVM0014221 | LG3 | pentatricopeptide repeat-con | not DE   | not DE   | not DE   | not DE  |
| EVM0023724 | LG3 | pentatricopeptide repeat-con | not DE   | not DE   | not DE   | not DE  |
| EVM0006021 | LG3 | pentatricopeptide repeat-con | not DE   | not DE   | not DE   | not DE  |
| EVM0008634 | LG3 | pentatricopeptide repeat-con | not DE   | not DE   | not DE   | not DE  |
| EVM0012997 | LG3 | pentatricopeptide repeat-con | not DE   | not DE   | not DE   | not DE  |
| EVM0015841 | LG3 | pentatricopeptide repeat-con | not DE   | not DE   | not DE   | not DE  |
| EVM0013890 | LG3 | pentatricopeptide repeat-con | not DE   | not DE   | not DE   | not DE  |
| EVM0020950 | LG3 | pentatricopeptide repeat-con | not DE   | not DE   | not DE   | not DE  |
| EVM0004776 | LG3 | pentatricopeptide repeat-con | 1.516795 | 9.38E-05 | not DE   | not DE  |
| EVM0006372 | LG3 | pentatricopeptide repeat-con | not DE   | not DE   | not DE   | not DE  |
| EVM0017954 | LG3 | pentatricopeptide repeat-con | not DE   | not DE   | not DE   | not DE  |
| EVM0024337 | LG3 | pentatricopeptide repeat-con | 1.743933 | 0.002608 | not DE   | not DE  |
| EVM0018197 | LG3 | pentatricopeptide repeat-con | 1.390369 | 0.035824 | not DE   | not DE  |
| EVM0022204 | LG3 | pentatricopeptide repeat-con | not DE   | not DE   | not DE   | not DE  |
| EVM0011511 | LG3 | pentatricopeptide repeat-con | not DE   | not DE   | not DE   | not DE  |
| EVM0020784 | LG3 | pentatricopeptide repeat-con | not DE   | not DE   | not DE   | not DE  |
| EVM0002071 | LG3 | pentatricopeptide repeat-con | not DE   | not DE   | not DE   | not DE  |
| EVM0019904 | LG3 | pentatricopeptide repeat-con | not DE   | not DE   | not DE   | not DE  |
| EVM0015745 | LG3 | peptidyl-prolyl cis-trans is | not DE   | not DE   | not DE   | not DE  |
| EVM0022144 | LG3 | peptidyl-tRNA hydrolase 2, m | not DE   | not DE   | not DE   | not DE  |
| EVM0000056 | LG3 | perakine reductase-like      | not DE   | not DE   | not DE   | not DE  |
| EVM0002547 | LG3 | perakine reductase-like      | not DE   | not DE   | not DE   | not DE  |
| EVM0007710 | LG3 | periaxin                     | not DE   | not DE   | not DE   | not DE  |
| EVM0001684 | LG3 | peroxidase 3-like            | not DE   | not DE   | not DE   | not DE  |
| EVM0010410 | LG3 | peroxidase 40                | not DE   | not DE   | not DE   | not DE  |
| EVM0006390 | LG3 | peroxiredoxin Q, chloroplast | not DE   | not DE   | 1.162229 | 0.0011  |
| EVM0005817 | LG3 | peroxisomal adenine nucleoti | not DE   | not DE   | not DE   | not DE  |
| EVM0013889 | LG3 | peroxisomal membrane protein | not DE   | not DE   | not DE   | not DE  |
| EVM0001572 | LG3 | peroxisome biogenesis factor | not DE   | not DE   | -2.65456 | 0.03488 |
| EVM0022573 | LG3 | peroxisome biogenesis factor | not DE   | not DE   | not DE   | not DE  |
| EVM0009382 | LG3 | peroxygenase 1-like          | not DE   | not DE   | not DE   | not DE  |
| EVM0017216 | LG3 | phenolic glucoside malonyltr | not DE   | not DE   | not DE   | not DE  |
| EVM0009021 | LG3 | phosphate transporter PH01-l | not DE   | not DE   | not DE   | not DE  |
| EVM0013965 | LG3 | phosphoinositide phosphatase | not DE   | not DE   | not DE   | not DE  |
| EVM0005278 | LG3 | phospholipase D pl-like isof | not DE   | not DE   | not DE   | not DE  |
| EVM0016360 | LG3 | photosystem II D1 precursor  | not DE   | not DE   | 1.297028 | 0.00012 |
| EVM0020993 | LG3 | phylloplanin-like            | not DE   | not DE   | not DE   | not DE  |
| EVM0023083 | LG3 | plasma membrane ATPase-like  | not DE   | not DE   | not DE   | not DE  |
| EVM0007329 | LG3 | pleiotropic drug resistance  | not DE   | not DE   | not DE   | not DE  |
| EVM0015052 | LG3 | pleiotropic drug resistance  | not DE   | not DE   | not DE   | not DE  |
| EVM0024164 | LG3 | pleiotropic drug resistance  | not DE   | not DE   | not DE   | not DE  |
| EVM0008472 | LG3 | poly(A) polymerase-like      | not DE   | not DE   | not DE   | not DE  |
| EVM0021858 | LG3 | poly(rC)-binding protein 1-l | not DE   | not DE   | not DE   | not DE  |
| EVM0016987 | LG3 | polygalacturonase            | not DE   | not DE   | not DE   | not DE  |
| EVM0000673 | LG3 | polygalacturonase-like       | not DE   | not DE   | not DE   | not DE  |
| EVM0002045 | LG3 | polygalacturonase-like       | not DE   | not DE   | not DE   | not DE  |
| EVM0003389 | LG3 | polygalacturonase-like       | not DE   | not DE   | not DE   | not DE  |
| EVM0004277 | LG3 | polygalacturonase-like       | not DE   | not DE   | not DE   | not DE  |
| EVM0004641 | LG3 | polygalacturonase-like       | not DE   | not DE   | not DE   | not DE  |
| EVM0005126 | LG3 | polygalacturonase-like       | not DE   | not DE   | not DE   | not DE  |
| EVM0006566 | LG3 | polygalacturonase-like       | not DE   | not DE   | not DE   | not DE  |

|            |     |                               |          |          |          |         |
|------------|-----|-------------------------------|----------|----------|----------|---------|
| EVM0007769 | LG3 | polygalacturonase-like        | not DE   | not DE   | not DE   | not DE  |
| EVM0009411 | LG3 | polygalacturonase-like        | not DE   | not DE   | not DE   | not DE  |
| EVM0011787 | LG3 | polygalacturonase-like        | not DE   | not DE   | not DE   | not DE  |
| EVM0012885 | LG3 | polygalacturonase-like        | not DE   | not DE   | not DE   | not DE  |
| EVM0014522 | LG3 | polygalacturonase-like        | not DE   | not DE   | not DE   | not DE  |
| EVM0015244 | LG3 | polygalacturonase-like        | not DE   | not DE   | not DE   | not DE  |
| EVM0019082 | LG3 | polygalacturonase-like        | not DE   | not DE   | not DE   | not DE  |
| EVM0019821 | LG3 | polygalacturonase-like        | not DE   | not DE   | not DE   | not DE  |
| EVM0021281 | LG3 | polygalacturonase-like        | not DE   | not DE   | not DE   | not DE  |
| EVM0012235 | LG3 | polyubiquitin-C-like isoform  | not DE   | not DE   | not DE   | not DE  |
| EVM0010617 | LG3 | polyubiquitin-C-like isoform  | not DE   | not DE   | not DE   | not DE  |
| EVM0002155 | LG3 | polyubiquitin-like            | not DE   | not DE   | not DE   | not DE  |
| EVM0002727 | LG3 | polyubiquitin-like            | not DE   | not DE   | not DE   | not DE  |
| EVM0017110 | LG3 | potassium channel AKT6-like   | not DE   | not DE   | not DE   | not DE  |
| EVM0001307 | LG3 | potassium channel KAT3-like   | not DE   | not DE   | not DE   | not DE  |
| EVM0013354 | LG3 | pre-mRNA-splicing factor SF2  | -1.91236 | 0.003526 | -1.84643 | #####   |
| EVM0016615 | LG3 | pre-mRNA-splicing factor SLU  | -4.80047 | 1.23E-22 | -2.10995 | #####   |
| EVM0010131 | LG3 | pre-mRNA-splicing factor cwf  | not DE   | not DE   | not DE   | not DE  |
| EVM0009865 | LG3 | preprotein translocase subun  | not DE   | not DE   | 1.677893 | #####   |
| EVM0013047 | LG3 | primary amine oxidase-like    | not DE   | not DE   | not DE   | not DE  |
| EVM0023749 | LG3 | probable 2-oxoglutarate-depe  | not DE   | not DE   | not DE   | not DE  |
| EVM0005233 | LG3 | probable ADP-ribosylation fa  | not DE   | not DE   | not DE   | not DE  |
| EVM0014459 | LG3 | probable E3 ubiquitin-protein | not DE   | not DE   | not DE   | not DE  |
| EVM0014860 | LG3 | probable E3 ubiquitin-protein | not DE   | not DE   | not DE   | not DE  |
| EVM0000802 | LG3 | probable L-type lectin-domain | not DE   | not DE   | not DE   | not DE  |
| EVM0008122 | LG3 | probable LRR receptor-like s  | not DE   | not DE   | not DE   | not DE  |
| EVM0004966 | LG3 | probable LRR receptor-like s  | not DE   | not DE   | not DE   | not DE  |
| EVM0005018 | LG3 | probable LRR receptor-like s  | not DE   | not DE   | not DE   | not DE  |
| EVM0006622 | LG3 | probable Xaa-Pro aminopeptid  | not DE   | not DE   | not DE   | not DE  |
| EVM0006505 | LG3 | probable anion transporter 6  | not DE   | not DE   | not DE   | not DE  |
| EVM0019362 | LG3 | probable carboxylesterase 17  | not DE   | not DE   | not DE   | not DE  |
| EVM0017807 | LG3 | probable disease resistance   | not DE   | not DE   | not DE   | not DE  |
| EVM0024607 | LG3 | probable enoyl-CoA hydratase  | not DE   | not DE   | not DE   | not DE  |
| EVM0021259 | LG3 | probable galactinol--sucrose  | not DE   | not DE   | -1.30531 | 0.00129 |
| EVM0004333 | LG3 | probable galacturonosyltrans  | not DE   | not DE   | not DE   | not DE  |
| EVM0020912 | LG3 | probable glucan endo-1,3-bet  | not DE   | not DE   | not DE   | not DE  |
| EVM0015467 | LG3 | probable glycosyltransferase  | not DE   | not DE   | not DE   | not DE  |
| EVM0007366 | LG3 | probable glycosyltransferase  | not DE   | not DE   | not DE   | not DE  |
| EVM0006127 | LG3 | probable helicase MAGATAMA 3  | not DE   | not DE   | not DE   | not DE  |
| EVM0017957 | LG3 | probable homogentisate phyty  | not DE   | not DE   | not DE   | not DE  |
| EVM0023989 | LG3 | probable importin-7 homolog   | not DE   | not DE   | not DE   | not DE  |
| EVM0010625 | LG3 | probable inactive leucine-ri  | not DE   | not DE   | not DE   | not DE  |
| EVM0016574 | LG3 | probable inorganic phosphate  | not DE   | not DE   | not DE   | not DE  |
| EVM0019664 | LG3 | probable isoleucine--tRNA li  | not DE   | not DE   | not DE   | not DE  |
| EVM0020134 | LG3 | probable lactoylglutathione   | not DE   | not DE   | not DE   | not DE  |
| EVM0001661 | LG3 | probable leucine-rich repeat  | not DE   | not DE   | not DE   | not DE  |
| EVM0020479 | LG3 | probable magnesium transport  | not DE   | not DE   | not DE   | not DE  |
| EVM0011801 | LG3 | probable methyltransferase P  | not DE   | not DE   | not DE   | not DE  |
| EVM0015876 | LG3 | probable pectinesterase/pect  | not DE   | not DE   | not DE   | not DE  |
| EVM0005894 | LG3 | probable pectinesterase/pect  | -3.502   | 0.010303 | not DE   | not DE  |
| EVM0001056 | LG3 | probable plastid-lipid-assoc  | not DE   | not DE   | not DE   | not DE  |
| EVM0016250 | LG3 | probable plastid-lipid-assoc  | -2.33742 | 0.0186   | not DE   | not DE  |
| EVM0003672 | LG3 | probable protein phosphatase  | not DE   | not DE   | not DE   | not DE  |
| EVM0013325 | LG3 | probable receptor protein ki  | not DE   | not DE   | not DE   | not DE  |

|            |     |                                          |          |          |          |        |
|------------|-----|------------------------------------------|----------|----------|----------|--------|
| EVM0017476 | LG3 | probable receptor protein kinase         | not DE   | not DE   | not DE   | not DE |
| EVM0013775 | LG3 | probable receptor-like protein           | not DE   | not DE   | not DE   | not DE |
| EVM0016339 | LG3 | probable receptor-like protein           | not DE   | not DE   | not DE   | not DE |
| EVM0005919 | LG3 | probable receptor-like protein           | not DE   | not DE   | not DE   | not DE |
| EVM0001591 | LG3 | probable receptor-like protein           | not DE   | not DE   | not DE   | not DE |
| EVM0017402 | LG3 | probable sarcosine oxidase-like          | not DE   | not DE   | not DE   | not DE |
| EVM0006708 | LG3 | probable serine incorporator             | not DE   | not DE   | not DE   | not DE |
| EVM0023201 | LG3 | probable serine incorporator             | not DE   | not DE   | not DE   | not DE |
| EVM0014115 | LG3 | probable serine/threonine-protein        | not DE   | not DE   | not DE   | not DE |
| EVM0022180 | LG3 | probable serine/threonine-protein        | not DE   | not DE   | not DE   | not DE |
| EVM0024042 | LG3 | probable serine/threonine-protein        | not DE   | not DE   | not DE   | not DE |
| EVM0006529 | LG3 | probable steroid-binding protein         | not DE   | not DE   | 1.270188 | #####  |
| EVM0017016 | LG3 | probable sucrose-phosphate synthase      | not DE   | not DE   | not DE   | not DE |
| EVM0007704 | LG3 | probable sugar phosphate/phosphatase     | not DE   | not DE   | not DE   | not DE |
| EVM0001944 | LG3 | probable sugar phosphate/phosphatase     | not DE   | not DE   | not DE   | not DE |
| EVM0009911 | LG3 | probable sugar phosphate/phosphatase     | not DE   | not DE   | not DE   | not DE |
| EVM0009742 | LG3 | probable tRNA N6-adenosine thiolase      | not DE   | not DE   | not DE   | not DE |
| EVM0010987 | LG3 | probable thiol methyltransferase         | not DE   | not DE   | not DE   | not DE |
| EVM0020619 | LG3 | probable transcriptional regulator       | 1.525505 | 0.004427 | not DE   | not DE |
| EVM0012754 | LG3 | probable uridine nucleosidase            | not DE   | not DE   | not DE   | not DE |
| EVM0018599 | LG3 | probable voltage-gated potassium channel | not DE   | not DE   | not DE   | not DE |
| EVM0023347 | LG3 | probably inactive leucine-rich repeat    | not DE   | not DE   | not DE   | not DE |
| EVM0023773 | LG3 | profilin-like                            | not DE   | not DE   | not DE   | not DE |
| EVM0001157 | LG3 | protein ASPARTIC PROTEASE INHIBITOR      | -2.78499 | 3.70E-08 | not DE   | not DE |
| EVM0002025 | LG3 | protein ASPARTIC PROTEASE INHIBITOR      | not DE   | not DE   | not DE   | not DE |
| EVM0013671 | LG3 | protein ASPARTIC PROTEASE INHIBITOR      | not DE   | not DE   | not DE   | not DE |
| EVM0015594 | LG3 | protein ASPARTIC PROTEASE INHIBITOR      | not DE   | not DE   | not DE   | not DE |
| EVM0017693 | LG3 | protein CHUP1, chloroplastical           | not DE   | not DE   | not DE   | not DE |
| EVM0002942 | LG3 | protein DEHYDRATION-INDUCED              | 1.160484 | 0.047423 | not DE   | not DE |
| EVM0008165 | LG3 | protein DEHYDRATION-INDUCED              | not DE   | not DE   | not DE   | not DE |
| EVM0017955 | LG3 | protein ECERIFERUM 26-like               | not DE   | not DE   | not DE   | not DE |
| EVM0003206 | LG3 | protein FAM133-like                      | not DE   | not DE   | not DE   | not DE |
| EVM0010218 | LG3 | protein FAR1-RELATED SEQUENCING          | not DE   | not DE   | not DE   | not DE |
| EVM0015921 | LG3 | protein FAR1-RELATED SEQUENCING          | not DE   | not DE   | not DE   | not DE |
| EVM0007742 | LG3 | protein FAR1-RELATED SEQUENCING          | not DE   | not DE   | not DE   | not DE |
| EVM0013070 | LG3 | protein GAMETE EXPRESSED 2-like          | not DE   | not DE   | not DE   | not DE |
| EVM0002307 | LG3 | protein GLUTAMINE DUMPER 1-like          | not DE   | not DE   | not DE   | not DE |
| EVM0020918 | LG3 | protein IQ-DOMAIN 14-like                | not DE   | not DE   | not DE   | not DE |
| EVM0022639 | LG3 | protein IQ-DOMAIN 14-like                | not DE   | not DE   | not DE   | not DE |
| EVM0014915 | LG3 | protein LST8 homolog isoform             | not DE   | not DE   | not DE   | not DE |
| EVM0006886 | LG3 | protein MEMO1-like                       | not DE   | not DE   | not DE   | not DE |
| EVM0017002 | LG3 | protein NRT1/ PTR FAMILY 4.5             | not DE   | not DE   | not DE   | not DE |
| EVM0013423 | LG3 | protein PEROXIN-4                        | not DE   | not DE   | not DE   | not DE |
| EVM0019866 | LG3 | protein PRD1-like                        | not DE   | not DE   | not DE   | not DE |
| EVM0010462 | LG3 | protein PROTON GRADIENT REGULATORY       | not DE   | not DE   | 1.353762 | #####  |
| EVM0010019 | LG3 | protein RALF-like 32-like                | not DE   | not DE   | not DE   | not DE |
| EVM0005768 | LG3 | protein RDM1                             | not DE   | not DE   | not DE   | not DE |
| EVM0004175 | LG3 | protein ROOT PRIMORDIUM DEFENSE          | 1.744404 | 0.009375 | not DE   | not DE |
| EVM0010054 | LG3 | protein SHORT-ROOT-like                  | not DE   | not DE   | not DE   | not DE |
| EVM0016832 | LG3 | protein SRG1-like                        | 4.627656 | 9.91E-06 | not DE   | not DE |
| EVM0018594 | LG3 | protein SRG1-like                        | not DE   | not DE   | not DE   | not DE |
| EVM0015762 | LG3 | protein TIFY 10A-like                    | not DE   | not DE   | not DE   | not DE |
| EVM0002649 | LG3 | protein TIME FOR COFFEE-like             | not DE   | not DE   | -1.13805 | #####  |
| EVM0005975 | LG3 | protein YIPF1 homolog isoform            | not DE   | not DE   | not DE   | not DE |

|            |     |                                      |          |          |        |        |
|------------|-----|--------------------------------------|----------|----------|--------|--------|
| EVM0016121 | LG3 | protein YIPF1 homolog isoform        | not DE   | not DE   | not DE | not DE |
| EVM0005020 | LG3 | protein YLS7-like                    | not DE   | not DE   | not DE | not DE |
| EVM0015238 | LG3 | protein YLS7-like isoform X1         | not DE   | not DE   | not DE | not DE |
| EVM0002048 | LG3 | protein arginine N-methyltransferase | not DE   | not DE   | not DE | not DE |
| EVM0022841 | LG3 | protein argonaute 10-like isoform    | not DE   | not DE   | not DE | not DE |
| EVM0020010 | LG3 | protein cereblon-like isoform        | not DE   | not DE   | not DE | not DE |
| EVM0016498 | LG3 | protein notum homolog                | not DE   | not DE   | not DE | not DE |
| EVM0007632 | LG3 | protein transport protein SERT       | not DE   | not DE   | not DE | not DE |
| EVM0019886 | LG3 | protein transport protein serine     | not DE   | not DE   | not DE | not DE |
| EVM0006389 | LG3 | psbB mRNA maturation factor          | not DE   | not DE   | not DE | not DE |
| EVM0005589 | LG3 | pto-interacting protein 1-like       | 1.684178 | 0.003657 | not DE | not DE |
| EVM0002480 | LG3 | pumilio homolog 12-like              | not DE   | not DE   | not DE | not DE |
| EVM0002389 | LG3 | pumilio homolog 24-like              | not DE   | not DE   | not DE | not DE |
| EVM0014253 | LG3 | purple acid phosphatase 15-like      | not DE   | not DE   | not DE | not DE |
| EVM0015651 | LG3 | putative L-ascorbate peroxidase      | not DE   | not DE   | not DE | not DE |
| EVM0001077 | LG3 | putative RNA methyltransferase       | not DE   | not DE   | not DE | not DE |
| EVM0000138 | LG3 | putative calcium-transporting        | not DE   | not DE   | not DE | not DE |
| EVM0017003 | LG3 | putative calcium-transporting        | not DE   | not DE   | not DE | not DE |
| EVM0019921 | LG3 | putative calcium-transporting        | not DE   | not DE   | not DE | not DE |
| EVM0022800 | LG3 | putative ion channel POLLUX-like     | not DE   | not DE   | not DE | not DE |
| EVM0019264 | LG3 | putative lipid-transfer protein      | not DE   | not DE   | not DE | not DE |
| EVM0021586 | LG3 | putative nuclease HARBI1-like        | not DE   | not DE   | not DE | not DE |
| EVM0005442 | LG3 | putative pectinesterase 63-like      | not DE   | not DE   | not DE | not DE |
| EVM0010304 | LG3 | putative pectinesterase/pectin       | not DE   | not DE   | not DE | not DE |
| EVM0015346 | LG3 | putative pectinesterase/pectin       | not DE   | not DE   | not DE | not DE |
| EVM0013305 | LG3 | putative pentatricopeptide repeat    | 2.496784 | 0.036241 | not DE | not DE |
| EVM0011545 | LG3 | putative pentatricopeptide repeat    | 2.573847 | 0.005622 | not DE | not DE |
| EVM0010775 | LG3 | putative pentatricopeptide repeat    | not DE   | not DE   | not DE | not DE |
| EVM0009165 | LG3 | putative pentatricopeptide repeat    | not DE   | not DE   | not DE | not DE |
| EVM0010641 | LG3 | putative pentatricopeptide repeat    | not DE   | not DE   | not DE | not DE |
| EVM0010882 | LG3 | putative peptide/nitrate transporter | not DE   | not DE   | not DE | not DE |
| EVM0001210 | LG3 | putative protein phosphatase         | not DE   | not DE   | not DE | not DE |
| EVM0020215 | LG3 | putative receptor-like protein       | not DE   | not DE   | not DE | not DE |
| EVM0024657 | LG3 | putative ubiquitin-conjugating       | not DE   | not DE   | not DE | not DE |
| EVM0019158 | LG3 | putative uncharacterized protein     | not DE   | not DE   | not DE | not DE |
| EVM0003957 | LG3 | rRNA-processing protein fcf2         | not DE   | not DE   | not DE | not DE |
| EVM0013257 | LG3 | rab GDP dissociation inhibitor       | not DE   | not DE   | not DE | not DE |
| EVM0023275 | LG3 | receptor-like cytosolic serine       | not DE   | not DE   | not DE | not DE |
| EVM0007097 | LG3 | receptor-like protein kinase         | not DE   | not DE   | not DE | not DE |
| EVM0019396 | LG3 | retrotransposon-like protein         | not DE   | not DE   | not DE | not DE |
| EVM0022962 | LG3 | ribonucleoside-diphosphate reductase | 1.311782 | 0.037706 | not DE | not DE |
| EVM0007007 | LG3 | ribosomal RNA-processing protein     | not DE   | not DE   | not DE | not DE |
| EVM0001285 | LG3 | selenium-binding protein 2-like      | not DE   | not DE   | not DE | not DE |
| EVM0021949 | LG3 | selenoprotein H-like                 | not DE   | not DE   | not DE | not DE |
| EVM0023454 | LG3 | selenoprotein H-like                 | not DE   | not DE   | not DE | not DE |
| EVM0005959 | LG3 | serine/arginine repetitive motif     | not DE   | not DE   | not DE | not DE |
| EVM0001649 | LG3 | serine/threonine protein phosphatase | not DE   | not DE   | not DE | not DE |
| EVM0019223 | LG3 | serine/threonine protein phosphatase | not DE   | not DE   | not DE | not DE |
| EVM0023839 | LG3 | serine/threonine-protein kinase      | not DE   | not DE   | not DE | not DE |
| EVM0022370 | LG3 | serine/threonine-protein kinase      | not DE   | not DE   | not DE | not DE |
| EVM0006190 | LG3 | serine/threonine-protein kinase      | not DE   | not DE   | not DE | not DE |
| EVM0001511 | LG3 | serine/threonine-protein kinase      | not DE   | not DE   | not DE | not DE |
| EVM0022803 | LG3 | serine/threonine-protein kinase      | not DE   | not DE   | not DE | not DE |
| EVM0011096 | LG3 | serine/threonine-protein phosphatase | not DE   | not DE   | not DE | not DE |

|            |     |                                              |          |          |          |         |
|------------|-----|----------------------------------------------|----------|----------|----------|---------|
| EVM0019703 | LG3 | serine/threonine-protein phosphatase 1B      | not DE   | not DE   | not DE   | not DE  |
| EVM0020713 | LG3 | serine/threonine-protein phosphatase 1B      | not DE   | not DE   | not DE   | not DE  |
| EVM0002846 | LG3 | small G protein signaling molecule 1         | not DE   | not DE   | not DE   | not DE  |
| EVM0005118 | LG3 | small acidic protein 1-like                  | not DE   | not DE   | 1.649688 | #####   |
| EVM0021063 | LG3 | small subunit processome component 1         | 1.201306 | 0.010119 | not DE   | not DE  |
| EVM0002189 | LG3 | small ubiquitin-related modifier 1           | not DE   | not DE   | not DE   | not DE  |
| EVM0010665 | LG3 | solute carrier family 25 member 1            | not DE   | not DE   | not DE   | not DE  |
| EVM0014129 | LG3 | solute carrier family 40 member 1            | not DE   | not DE   | not DE   | not DE  |
| EVM0019764 | LG3 | splicing factor 3B subunit 1                 | not DE   | not DE   | not DE   | not DE  |
| EVM0003319 | LG3 | squamosa promoter-binding-like protein 1     | not DE   | not DE   | not DE   | not DE  |
| EVM0014650 | LG3 | stachyose synthase-like                      | not DE   | not DE   | not DE   | not DE  |
| EVM0002560 | LG3 | strictosidine synthase-like                  | not DE   | not DE   | not DE   | not DE  |
| EVM0010346 | LG3 | stromal cell-derived factor 1                | -2.01719 | 3.42E-07 | not DE   | not DE  |
| EVM0008669 | LG3 | sucrose nonfermenting 4-like protein 1       | not DE   | not DE   | -5.76588 | #####   |
| EVM0017451 | LG3 | sucrose nonfermenting 4-like protein 1       | not DE   | not DE   | not DE   | not DE  |
| EVM0023372 | LG3 | sulfate transporter 3.1-like                 | not DE   | not DE   | not DE   | not DE  |
| EVM0017631 | LG3 | syntaxin-43-like isoform X1                  | not DE   | not DE   | not DE   | not DE  |
| EVM0024592 | LG3 | tRNA (guanine-N(7)-)-methyltransferase       | not DE   | not DE   | not DE   | not DE  |
| EVM0014541 | LG3 | tRNA(adenine(34)) deaminase, cytosolic       | not DE   | not DE   | not DE   | not DE  |
| EVM0006747 | LG3 | tetratricopeptide repeat protein 1           | not DE   | not DE   | not DE   | not DE  |
| EVM0019964 | LG3 | tetratricopeptide repeat protein 1           | not DE   | not DE   | not DE   | not DE  |
| EVM0022316 | LG3 | tetratricopeptide repeat protein 1           | not DE   | not DE   | not DE   | not DE  |
| EVM0021665 | LG3 | thioredoxin reductase 1-like                 | not DE   | not DE   | not DE   | not DE  |
| EVM0022987 | LG3 | thioredoxin reductase 1-like                 | not DE   | not DE   | not DE   | not DE  |
| EVM0010752 | LG3 | topless-related protein 1-like               | not DE   | not DE   | not DE   | not DE  |
| EVM0009115 | LG3 | topless-related protein 3-like               | not DE   | not DE   | -1.54061 | 0.00106 |
| EVM0017362 | LG3 | transcription factor HY5-like                | not DE   | not DE   | 1.281346 | #####   |
| EVM0007740 | LG3 | transcription factor MUTE-like               | not DE   | not DE   | not DE   | not DE  |
| EVM0019497 | LG3 | transcription factor MYB108-like             | not DE   | not DE   | not DE   | not DE  |
| EVM0001665 | LG3 | transcription factor MYB24-like              | not DE   | not DE   | not DE   | not DE  |
| EVM0002142 | LG3 | transcription factor TT2-like                | not DE   | not DE   | not DE   | not DE  |
| EVM0023961 | LG3 | transcription factor TT2-like                | not DE   | not DE   | not DE   | not DE  |
| EVM0019417 | LG3 | transcription factor bHLH104-like            | not DE   | not DE   | not DE   | not DE  |
| EVM0022909 | LG3 | transcription factor bHLH62-like             | not DE   | not DE   | not DE   | not DE  |
| EVM0010319 | LG3 | transcription factor bHLH92-like             | not DE   | not DE   | not DE   | not DE  |
| EVM0015369 | LG3 | transcription initiation factor 1            | 1.016273 | 0.000257 | not DE   | not DE  |
| EVM0003554 | LG3 | transcription regulatory protein 1           | not DE   | not DE   | not DE   | not DE  |
| EVM0003313 | LG3 | transcription repressor MYB5-like            | not DE   | not DE   | not DE   | not DE  |
| EVM0017702 | LG3 | transcription repressor MYB5-like            | not DE   | not DE   | not DE   | not DE  |
| EVM0015536 | LG3 | transmembrane 9 superfamily member 1         | not DE   | not DE   | not DE   | not DE  |
| EVM0024548 | LG3 | transposon Ty3-G Gag-Pol polymerase          | not DE   | not DE   | not DE   | not DE  |
| EVM0021860 | LG3 | type I inositol 1,4,5-trisphosphate 3-kinase | 2.222964 | 0.000743 | not DE   | not DE  |
| EVM0011785 | LG3 | type I inositol 1,4,5-trisphosphate 3-kinase | not DE   | not DE   | not DE   | not DE  |
| EVM0009823 | LG3 | ubiquinone biosynthesis monooxygenase        | not DE   | not DE   | not DE   | not DE  |
| EVM0005837 | LG3 | ubiquitin carboxyl-terminal hydrolase 1      | not DE   | not DE   | not DE   | not DE  |
| EVM0015850 | LG3 | ubiquitin carboxyl-terminal hydrolase 1      | not DE   | not DE   | not DE   | not DE  |
| EVM0011284 | LG3 | ubiquitin carboxyl-terminal hydrolase 1      | not DE   | not DE   | not DE   | not DE  |
| EVM0016775 | LG3 | uncharacterized GPI-anchored protein         | not DE   | not DE   | not DE   | not DE  |
| EVM0003029 | LG3 | uncharacterized protein At1g10330            | not DE   | not DE   | not DE   | not DE  |
| EVM0020159 | LG3 | uncharacterized protein At2g10330            | not DE   | not DE   | not DE   | not DE  |
| EVM0009067 | LG3 | uncharacterized protein At3g10330            | not DE   | not DE   | not DE   | not DE  |
| EVM0012741 | LG3 | uncharacterized protein At3g10330            | not DE   | not DE   | not DE   | not DE  |
| EVM0021305 | LG3 | uncharacterized protein C9orf10              | not DE   | not DE   | not DE   | not DE  |
| EVM0017609 | LG3 | uncharacterized protein DDB1                 | not DE   | not DE   | not DE   | not DE  |

|            |     |                              |          |          |          |         |
|------------|-----|------------------------------|----------|----------|----------|---------|
| EVM0005115 | LG3 | uncharacterized protein LOC1 | not DE   | not DE   | not DE   | not DE  |
| EVM0003346 | LG3 | uncharacterized protein LOC1 | not DE   | not DE   | not DE   | not DE  |
| EVM0013924 | LG3 | uncharacterized protein LOC1 | not DE   | not DE   | not DE   | not DE  |
| EVM0020883 | LG3 | uncharacterized protein LOC1 | not DE   | not DE   | not DE   | not DE  |
| EVM0009319 | LG3 | uncharacterized protein LOC1 | not DE   | not DE   | not DE   | not DE  |
| EVM0017107 | LG3 | uncharacterized protein LOC1 | not DE   | not DE   | not DE   | not DE  |
| EVM0019133 | LG3 | uncharacterized protein LOC1 | not DE   | not DE   | not DE   | not DE  |
| EVM0007282 | LG3 | uncharacterized protein LOC1 | not DE   | not DE   | not DE   | not DE  |
| EVM0009508 | LG3 | uncharacterized protein LOC1 | not DE   | not DE   | not DE   | not DE  |
| EVM0006609 | LG3 | uncharacterized protein LOC1 | not DE   | not DE   | not DE   | not DE  |
| EVM0013226 | LG3 | uncharacterized protein LOC1 | not DE   | not DE   | 2.552042 | 0.04691 |
| EVM0015845 | LG3 | uncharacterized protein LOC1 | not DE   | not DE   | not DE   | not DE  |
| EVM0014962 | LG3 | uncharacterized protein LOC1 | not DE   | not DE   | not DE   | not DE  |
| EVM0018916 | LG3 | uncharacterized protein LOC1 | not DE   | not DE   | not DE   | not DE  |
| EVM0017223 | LG3 | uncharacterized protein LOC1 | not DE   | not DE   | not DE   | not DE  |
| EVM0018112 | LG3 | uncharacterized protein LOC1 | not DE   | not DE   | not DE   | not DE  |
| EVM0021545 | LG3 | uncharacterized protein LOC1 | not DE   | not DE   | not DE   | not DE  |
| EVM0002839 | LG3 | uncharacterized protein LOC1 | not DE   | not DE   | not DE   | not DE  |
| EVM0016570 | LG3 | uncharacterized protein LOC1 | not DE   | not DE   | not DE   | not DE  |
| EVM0022807 | LG3 | uncharacterized protein LOC1 | not DE   | not DE   | not DE   | not DE  |
| EVM0012621 | LG3 | uncharacterized protein LOC1 | not DE   | not DE   | not DE   | not DE  |
| EVM0020186 | LG3 | uncharacterized protein LOC1 | not DE   | not DE   | not DE   | not DE  |
| EVM0018015 | LG3 | uncharacterized protein LOC1 | not DE   | not DE   | not DE   | not DE  |
| EVM0022755 | LG3 | uncharacterized protein LOC1 | not DE   | not DE   | not DE   | not DE  |
| EVM0009346 | LG3 | uncharacterized protein LOC1 | not DE   | not DE   | not DE   | not DE  |
| EVM0007197 | LG3 | uncharacterized protein LOC1 | not DE   | not DE   | not DE   | not DE  |
| EVM0012654 | LG3 | uncharacterized protein LOC1 | not DE   | not DE   | not DE   | not DE  |
| EVM0014645 | LG3 | uncharacterized protein LOC1 | not DE   | not DE   | not DE   | not DE  |
| EVM0007933 | LG3 | uncharacterized protein LOC1 | not DE   | not DE   | not DE   | not DE  |
| EVM0014698 | LG3 | uncharacterized protein LOC1 | not DE   | not DE   | not DE   | not DE  |
| EVM0017197 | LG3 | uncharacterized protein LOC1 | not DE   | not DE   | not DE   | not DE  |
| EVM0007848 | LG3 | uncharacterized protein LOC1 | 2.829165 | 0.006023 | not DE   | not DE  |
| EVM0014137 | LG3 | uncharacterized protein LOC1 | not DE   | not DE   | not DE   | not DE  |
| EVM0000375 | LG3 | uncharacterized protein LOC1 | -1.79881 | 0.000308 | not DE   | not DE  |
| EVM0004119 | LG3 | uncharacterized protein LOC1 | not DE   | not DE   | not DE   | not DE  |
| EVM0003207 | LG3 | uncharacterized protein LOC1 | not DE   | not DE   | not DE   | not DE  |
| EVM0008059 | LG3 | uncharacterized protein LOC1 | not DE   | not DE   | not DE   | not DE  |
| EVM0022183 | LG3 | uncharacterized protein LOC1 | not DE   | not DE   | not DE   | not DE  |
| EVM0020234 | LG3 | uncharacterized protein LOC1 | not DE   | not DE   | not DE   | not DE  |
| EVM0020679 | LG3 | uncharacterized protein LOC1 | not DE   | not DE   | not DE   | not DE  |
| EVM0004757 | LG3 | uncharacterized protein LOC1 | not DE   | not DE   | not DE   | not DE  |
| EVM0019399 | LG3 | uncharacterized protein LOC1 | 1.424771 | 0.011509 | not DE   | not DE  |
| EVM0000698 | LG3 | uncharacterized protein LOC1 | not DE   | not DE   | not DE   | not DE  |
| EVM0004390 | LG3 | uncharacterized protein LOC1 | not DE   | not DE   | not DE   | not DE  |
| EVM0009732 | LG3 | uncharacterized protein LOC1 | not DE   | not DE   | not DE   | not DE  |
| EVM0014870 | LG3 | uncharacterized protein LOC1 | 4.71505  | 0.04754  | not DE   | not DE  |
| EVM0006700 | LG3 | uncharacterized protein LOC1 | not DE   | not DE   | not DE   | not DE  |
| EVM0007596 | LG3 | uncharacterized protein LOC1 | not DE   | not DE   | not DE   | not DE  |
| EVM0011699 | LG3 | uncharacterized protein LOC1 | not DE   | not DE   | not DE   | not DE  |
| EVM0014529 | LG3 | uncharacterized protein LOC1 | not DE   | not DE   | not DE   | not DE  |
| EVM0002096 | LG3 | uncharacterized protein LOC1 | not DE   | not DE   | not DE   | not DE  |
| EVM0002662 | LG3 | uncharacterized protein LOC1 | not DE   | not DE   | not DE   | not DE  |
| EVM0008856 | LG3 | uncharacterized protein LOC1 | not DE   | not DE   | not DE   | not DE  |
| EVM0009604 | LG3 | uncharacterized protein LOC1 | 1.229761 | 0.038295 | not DE   | not DE  |

|            |     |                              |          |          |          |         |
|------------|-----|------------------------------|----------|----------|----------|---------|
| EVM0018097 | LG3 | uncharacterized protein LOC1 | not DE   | not DE   | not DE   | not DE  |
| EVM0007921 | LG3 | uncharacterized protein LOC1 | not DE   | not DE   | not DE   | not DE  |
| EVM0004109 | LG3 | uncharacterized protein LOC1 | not DE   | not DE   | -1.31405 | #####   |
| EVM0013750 | LG3 | uncharacterized protein LOC1 | not DE   | not DE   | not DE   | not DE  |
| EVM0011339 | LG3 | uncharacterized protein LOC1 | not DE   | not DE   | not DE   | not DE  |
| EVM0018066 | LG3 | uncharacterized protein LOC1 | not DE   | not DE   | not DE   | not DE  |
| EVM0013539 | LG3 | uncharacterized protein LOC1 | not DE   | not DE   | not DE   | not DE  |
| EVM0021714 | LG3 | uncharacterized protein LOC1 | not DE   | not DE   | not DE   | not DE  |
| EVM0008740 | LG3 | uncharacterized protein LOC1 | not DE   | not DE   | not DE   | not DE  |
| EVM0014429 | LG3 | uncharacterized protein LOC1 | not DE   | not DE   | not DE   | not DE  |
| EVM0020302 | LG3 | uncharacterized protein LOC1 | not DE   | not DE   | not DE   | not DE  |
| EVM0003339 | LG3 | uncharacterized protein LOC1 | 1.285956 | 0.00537  | not DE   | not DE  |
| EVM0005276 | LG3 | uncharacterized protein LOC1 | not DE   | not DE   | not DE   | not DE  |
| EVM0009735 | LG3 | uncharacterized protein LOC1 | not DE   | not DE   | not DE   | not DE  |
| EVM0010022 | LG3 | uncharacterized protein LOC1 | not DE   | not DE   | not DE   | not DE  |
| EVM0000177 | LG3 | uncharacterized protein LOC1 | not DE   | not DE   | not DE   | not DE  |
| EVM0006140 | LG3 | uncharacterized protein LOC1 | not DE   | not DE   | not DE   | not DE  |
| EVM0020622 | LG3 | uncharacterized protein LOC1 | -1.11504 | 0.047547 | not DE   | not DE  |
| EVM0002399 | LG3 | uncharacterized protein LOC1 | not DE   | not DE   | not DE   | not DE  |
| EVM0003593 | LG3 | uncharacterized protein LOC1 | not DE   | not DE   | not DE   | not DE  |
| EVM0010546 | LG3 | uncharacterized protein LOC1 | not DE   | not DE   | not DE   | not DE  |
| EVM0006050 | LG3 | uncharacterized protein LOC1 | not DE   | not DE   | not DE   | not DE  |
| EVM0015130 | LG3 | uncharacterized protein LOC1 | 1.614674 | 0.000457 | not DE   | not DE  |
| EVM0018710 | LG3 | uncharacterized protein LOC1 | not DE   | not DE   | not DE   | not DE  |
| EVM0006386 | LG3 | uncharacterized protein LOC1 | not DE   | not DE   | not DE   | not DE  |
| EVM0013180 | LG3 | uncharacterized protein LOC1 | not DE   | not DE   | not DE   | not DE  |
| EVM0004530 | LG3 | uncharacterized protein LOC1 | not DE   | not DE   | not DE   | not DE  |
| EVM0004374 | LG3 | uncharacterized protein LOC1 | not DE   | not DE   | not DE   | not DE  |
| EVM0021274 | LG3 | uncharacterized protein LOC1 | not DE   | not DE   | not DE   | not DE  |
| EVM0018115 | LG3 | uncharacterized protein LOC1 | not DE   | not DE   | not DE   | not DE  |
| EVM0003802 | LG3 | uncharacterized protein LOC1 | not DE   | not DE   | not DE   | not DE  |
| EVM0023860 | LG3 | uncharacterized protein LOC1 | not DE   | not DE   | not DE   | not DE  |
| EVM0006162 | LG3 | uncharacterized protein LOC1 | not DE   | not DE   | not DE   | not DE  |
| EVM0022360 | LG3 | uncharacterized protein LOC1 | not DE   | not DE   | not DE   | not DE  |
| EVM0012917 | LG3 | uncharacterized protein LOC1 | not DE   | not DE   | not DE   | not DE  |
| EVM0022583 | LG3 | uncharacterized protein LOC1 | not DE   | not DE   | not DE   | not DE  |
| EVM0013096 | LG3 | uncharacterized protein LOC1 | not DE   | not DE   | not DE   | not DE  |
| EVM0011603 | LG3 | uncharacterized protein LOC1 | -1.75296 | 0.02412  | not DE   | not DE  |
| EVM0007079 | LG3 | uncharacterized protein LOC1 | not DE   | not DE   | not DE   | not DE  |
| EVM0010896 | LG3 | uncharacterized protein LOC1 | not DE   | not DE   | not DE   | not DE  |
| EVM0009925 | LG3 | uncharacterized protein LOC1 | not DE   | not DE   | not DE   | not DE  |
| EVM0011444 | LG3 | uncharacterized protein LOC1 | not DE   | not DE   | not DE   | not DE  |
| EVM0005976 | LG3 | uncharacterized protein LOC1 | not DE   | not DE   | not DE   | not DE  |
| EVM0010620 | LG3 | uncharacterized protein LOC1 | not DE   | not DE   | not DE   | not DE  |
| EVM0003309 | LG3 | uncharacterized protein LOC1 | not DE   | not DE   | not DE   | not DE  |
| EVM0006772 | LG3 | uncharacterized protein LOC1 | not DE   | not DE   | not DE   | not DE  |
| EVM0016245 | LG3 | uncharacterized protein LOC1 | not DE   | not DE   | not DE   | not DE  |
| EVM0015194 | LG3 | uncharacterized protein LOC1 | not DE   | not DE   | not DE   | not DE  |
| EVM0024271 | LG3 | uncharacterized protein LOC1 | not DE   | not DE   | not DE   | not DE  |
| EVM0021355 | LG3 | uncharacterized protein LOC1 | not DE   | not DE   | not DE   | not DE  |
| EVM0004078 | LG3 | uncharacterized protein LOC1 | not DE   | not DE   | 2.202745 | 0.01624 |
| EVM0013331 | LG3 | uncharacterized protein LOC1 | not DE   | not DE   | not DE   | not DE  |
| EVM0010566 | LG3 | uncharacterized protein LOC1 | not DE   | not DE   | not DE   | not DE  |
| EVM0006030 | LG3 | uncharacterized protein LOC1 | not DE   | not DE   | not DE   | not DE  |



|            |     |                              |          |          |          |         |
|------------|-----|------------------------------|----------|----------|----------|---------|
| EVM0020227 | LG3 | uncharacterized protein LOC1 | not DE   | not DE   | not DE   | not DE  |
| EVM0018032 | LG3 | uncharacterized protein LOC1 | not DE   | not DE   | not DE   | not DE  |
| EVM0024194 | LG3 | uncharacterized protein LOC1 | not DE   | not DE   | not DE   | not DE  |
| EVM0014693 | LG3 | uncharacterized protein LOC1 | not DE   | not DE   | not DE   | not DE  |
| EVM0015534 | LG3 | uncharacterized protein LOC1 | not DE   | not DE   | not DE   | not DE  |
| EVM0023364 | LG3 | uncharacterized protein LOC1 | not DE   | not DE   | not DE   | not DE  |
| EVM0014935 | LG3 | uncharacterized protein LOC1 | not DE   | not DE   | not DE   | not DE  |
| EVM0003992 | LG3 | uncharacterized protein LOC1 | not DE   | not DE   | 1.412175 | #####   |
| EVM0022362 | LG3 | uncharacterized protein LOC1 | not DE   | not DE   | not DE   | not DE  |
| EVM0011751 | LG3 | uncharacterized protein LOC1 | not DE   | not DE   | not DE   | not DE  |
| EVM0006288 | LG3 | uncharacterized protein LOC1 | not DE   | not DE   | not DE   | not DE  |
| EVM0014865 | LG3 | uncharacterized protein LOC1 | not DE   | not DE   | not DE   | not DE  |
| EVM0000175 | LG3 | uncharacterized protein LOC1 | not DE   | not DE   | not DE   | not DE  |
| EVM0005585 | LG3 | uncharacterized protein LOC1 | not DE   | not DE   | not DE   | not DE  |
| EVM0020109 | LG3 | uncharacterized protein LOC1 | not DE   | not DE   | not DE   | not DE  |
| EVM0021348 | LG3 | uncharacterized protein LOC1 | not DE   | not DE   | not DE   | not DE  |
| EVM0004623 | LG3 | uncharacterized protein LOC1 | not DE   | not DE   | not DE   | not DE  |
| EVM0006766 | LG3 | uncharacterized protein LOC1 | not DE   | not DE   | not DE   | not DE  |
| EVM0006646 | LG3 | uncharacterized protein LOC1 | not DE   | not DE   | not DE   | not DE  |
| EVM0017177 | LG3 | uncharacterized protein LOC1 | not DE   | not DE   | not DE   | not DE  |
| EVM0001680 | LG3 | uncharacterized protein LOC1 | not DE   | not DE   | not DE   | not DE  |
| EVM0017588 | LG3 | uncharacterized protein LOC1 | not DE   | not DE   | 1.328976 | 0.00959 |
| EVM0000917 | LG3 | uncharacterized protein LOC1 | not DE   | not DE   | not DE   | not DE  |
| EVM0022407 | LG3 | uncharacterized protein LOC1 | not DE   | not DE   | not DE   | not DE  |
| EVM0016405 | LG3 | uncharacterized protein LOC1 | not DE   | not DE   | not DE   | not DE  |
| EVM0004819 | LG3 | uncharacterized protein LOC1 | 1.00132  | 0.019127 | 1.421942 | 0.00032 |
| EVM0013480 | LG3 | uncharacterized protein LOC1 | not DE   | not DE   | not DE   | not DE  |
| EVM0002191 | LG3 | uncharacterized protein LOC1 | not DE   | not DE   | not DE   | not DE  |
| EVM0010956 | LG3 | uncharacterized protein LOC1 | not DE   | not DE   | not DE   | not DE  |
| EVM0022161 | LG3 | uncharacterized protein LOC1 | not DE   | not DE   | not DE   | not DE  |
| EVM0001804 | LG3 | uncharacterized protein LOC1 | not DE   | not DE   | not DE   | not DE  |
| EVM0002358 | LG3 | uncharacterized protein LOC1 | 4.262835 | 0.002797 | not DE   | not DE  |
| EVM0012374 | LG3 | uncharacterized protein LOC1 | not DE   | not DE   | not DE   | not DE  |
| EVM0023808 | LG3 | uncharacterized protein LOC1 | not DE   | not DE   | not DE   | not DE  |
| EVM0003375 | LG3 | uncharacterized protein LOC1 | not DE   | not DE   | not DE   | not DE  |
| EVM0024475 | LG3 | uncharacterized protein LOC1 | not DE   | not DE   | not DE   | not DE  |
| EVM0017630 | LG3 | uncharacterized transmembran | not DE   | not DE   | not DE   | not DE  |
| EVM0008562 | LG3 | uncharacterized vacuolar mem | not DE   | not DE   | not DE   | not DE  |
| EVM0018433 | LG3 | uncharacterized vacuolar mem | not DE   | not DE   | not DE   | not DE  |
| EVM0014668 | LG3 | vacuolar amino acid transpor | not DE   | not DE   | not DE   | not DE  |
| EVM0004402 | LG3 | vesicle-associated membrane  | not DE   | not DE   | not DE   | not DE  |
| EVM0021021 | LG3 | vesicle-associated membrane  | not DE   | not DE   | not DE   | not DE  |
| EVM0019533 | LG3 | vesicle-associated membrane  | not DE   | not DE   | not DE   | not DE  |
| EVM0017632 | LG3 | vesicle-associated protein 2 | not DE   | not DE   | not DE   | not DE  |
| EVM0021610 | LG3 | vicianin hydrolase-like      | not DE   | not DE   | not DE   | not DE  |
| EVM0022107 | LG3 | vicianin hydrolase-like      | not DE   | not DE   | not DE   | not DE  |
| EVM0012577 | LG3 | wall-associated receptor kin | not DE   | not DE   | not DE   | not DE  |
| EVM0004911 | LG3 | wall-associated receptor kin | not DE   | not DE   | not DE   | not DE  |
| EVM0011862 | LG3 | wall-associated receptor kin | not DE   | not DE   | not DE   | not DE  |
| EVM0017835 | LG3 | wall-associated receptor kin | not DE   | not DE   | not DE   | not DE  |
| EVM0005429 | LG3 | zeaxanthin epoxidase, chloro | not DE   | not DE   | not DE   | not DE  |
| EVM0009783 | LG3 | zinc finger CCCH domain-cont | not DE   | not DE   | not DE   | not DE  |
| EVM0017363 | LG3 | zinc finger MYM-type protein | not DE   | not DE   | not DE   | not DE  |
| EVM0018569 | LG3 | zinc finger matrin-type prot | not DE   | not DE   | not DE   | not DE  |

|            |     |                                |          |          |          |        |
|------------|-----|--------------------------------|----------|----------|----------|--------|
| EVM0001062 | LG3 | 1,2-dihydroxy-3-keto-5-methyl  | not DE   | not DE   | not DE   | not DE |
| EVM0006875 | LG3 | 1-deoxyxylulose-5-phosphate s  | not DE   | not DE   | not DE   | not DE |
| EVM0000117 | LG3 | 11S globulin                   | not DE   | not DE   | not DE   | not DE |
| EVM0002987 | LG3 | 15-cis-zeta-carotene isomeras  | not DE   | not DE   | not DE   | not DE |
| EVM0015183 | LG3 | 2Fe-2S ferredoxin-like superf  | -1.18484 | 0.020406 | not DE   | not DE |
| EVM0000575 | LG3 | 3-ketoacyl-CoA synthase        | not DE   | not DE   | not DE   | not DE |
| EVM0001427 | LG3 | 3-ketoacyl-CoA synthase        | not DE   | not DE   | not DE   | not DE |
| EVM0016990 | LG3 | 3-ketoacyl-CoA synthase        | not DE   | not DE   | not DE   | not DE |
| EVM0020590 | LG3 | 3-ketoacyl-CoA synthase        | not DE   | not DE   | not DE   | not DE |
| EVM0002301 | LG3 | 3-ketoacyl-CoA synthase 10 -1  | not DE   | not DE   | not DE   | not DE |
| EVM0008132 | LG3 | 40S ribosomal S3a              | not DE   | not DE   | not DE   | not DE |
| EVM0018246 | LG3 | ACT domain-containing small s  | not DE   | not DE   | not DE   | not DE |
| EVM0019887 | LG3 | ACT domain-containing small s  | not DE   | not DE   | not DE   | not DE |
| EVM0011635 | LG3 | ADP-ribosylation factor        | not DE   | not DE   | not DE   | not DE |
| EVM0012393 | LG3 | AMP-dependent synthetase and   | not DE   | not DE   | not DE   | not DE |
| EVM0012792 | LG3 | AP2/EREBP transcription facto  | not DE   | not DE   | not DE   | not DE |
| EVM0000749 | LG3 | AP2/ERF domain-containing tran | not DE   | not DE   | not DE   | not DE |
| EVM0017351 | LG3 | AP2/ERF domain-containing tran | not DE   | not DE   | not DE   | not DE |
| EVM0002931 | LG3 | AT-hook motif nuclear localiz  | not DE   | not DE   | not DE   | not DE |
| EVM0009269 | LG3 | ATDI21                         | 1.260457 | 0.044551 | not DE   | not DE |
| EVM0022726 | LG3 | ATP binding cassette subfamil  | not DE   | not DE   | not DE   | not DE |
| EVM0015581 | LG3 | ATP citrate lyase subunit B 2  | not DE   | not DE   | not DE   | not DE |
| EVM0007542 | LG3 | ATP synthase subunit b&apos;   | -1.14604 | 0.011163 | not DE   | not DE |
| EVM0008643 | LG3 | ATP-dependent RNA and DNA hel  | not DE   | not DE   | not DE   | not DE |
| EVM0012874 | LG3 | Acetyltransferase, putative i  | not DE   | not DE   | not DE   | not DE |
| EVM0007544 | LG3 | Acidic leucine-rich nuclear p  | not DE   | not DE   | not DE   | not DE |
| EVM0015283 | LG3 | Adenine nucleotide alpha hydr  | not DE   | not DE   | not DE   | not DE |
| EVM0023650 | LG3 | Alba DNA/RNA-binding protein   | not DE   | not DE   | not DE   | not DE |
| EVM0003479 | LG3 | Aldose 1-epimerase             | not DE   | not DE   | not DE   | not DE |
| EVM0022996 | LG3 | Alpha/beta-Hydrolases superfa  | not DE   | not DE   | not DE   | not DE |
| EVM0003052 | LG3 | Arginine methyltransferase 4A  | not DE   | not DE   | not DE   | not DE |
| EVM0022389 | LG3 | Autoinhibited calcium ATPase   | not DE   | not DE   | not DE   | not DE |
| EVM0006368 | LG3 | Auxin-responsive protein IAA1  | not DE   | not DE   | not DE   | not DE |
| EVM0013838 | LG3 | BAHD family acyltransferase,   | not DE   | not DE   | not DE   | not DE |
| EVM0002872 | LG3 | Bet1-like protein              | not DE   | not DE   | not DE   | not DE |
| EVM0012028 | LG3 | Binding protein, putative      | not DE   | not DE   | not DE   | not DE |
| EVM0001973 | LG3 | BnaC08g33790D                  | -1.35773 | 0.01503  | not DE   | not DE |
| EVM0013992 | LG3 | C2H2 and C2HC zinc fingers su  | not DE   | not DE   | not DE   | not DE |
| EVM0004807 | LG3 | C2H2 and C2HC zinc fingers su  | not DE   | not DE   | not DE   | not DE |
| EVM0018830 | LG3 | CAMP-regulated phosphoprotein  | not DE   | not DE   | not DE   | not DE |
| EVM0019564 | LG3 | CASP-like protein RCOM_067987  | 3.413366 | 0.005151 | not DE   | not DE |
| EVM0002580 | LG3 | CBL-interacting protein kinas  | 2.087879 | 0.000385 | not DE   | not DE |
| EVM0008491 | LG3 | CCT motif family protein isof  | not DE   | not DE   | not DE   | not DE |
| EVM0015329 | LG3 | CONSTANS-like 4                | not DE   | not DE   | not DE   | not DE |
| EVM0008548 | LG3 | Calcium-binding EF-hand famil  | 1.616855 | 4.28E-05 | 1.704024 | #####  |
| EVM0006279 | LG3 | Calcium-dependent lipid-bindi  | not DE   | not DE   | -1.08417 | #####  |
| EVM0005406 | LG3 | Carbohydrate-binding X8 domai  | not DE   | not DE   | not DE   | not DE |
| EVM0012423 | LG3 | Casein kinase I protein        | not DE   | not DE   | not DE   | not DE |
| EVM0012671 | LG3 | Catalytic, putative            | not DE   | not DE   | not DE   | not DE |
| EVM0006701 | LG3 | Cell wall / vacuolar inhibito  | not DE   | not DE   | not DE   | not DE |
| EVM0003352 | LG3 | Cellulose synthase like G2, p  | not DE   | not DE   | not DE   | not DE |
| EVM0003010 | LG3 | Chaperone protein dnaJ 20      | -1.23122 | 0.001409 | not DE   | not DE |
| EVM0003936 | LG3 | Chitinase family protein       | not DE   | not DE   | not DE   | not DE |
| EVM0009379 | LG3 | Chlorophyllase 1 family prote  | 1.209893 | 0.000601 | not DE   | not DE |

|            |     |                               |          |          |          |         |
|------------|-----|-------------------------------|----------|----------|----------|---------|
| EVM0022579 | LG3 | Clathrin adaptor complexes me | not DE   | not DE   | not DE   | not DE  |
| EVM0003198 | LG3 | Cullin 1, putative isoform 1  | not DE   | not DE   | not DE   | not DE  |
| EVM0018607 | LG3 | Cullin 1, putative isoform 1  | not DE   | not DE   | not DE   | not DE  |
| EVM0004441 | LG3 | Cyclic nucleotide-gated chann | not DE   | not DE   | not DE   | not DE  |
| EVM0011667 | LG3 | Cysteine proteinase inhibitor | not DE   | not DE   | not DE   | not DE  |
| EVM0008904 | LG3 | Cysteine/Histidine-rich Cl do | not DE   | not DE   | not DE   | not DE  |
| EVM0013057 | LG3 | Cysteine/Histidine-rich Cl do | not DE   | not DE   | not DE   | not DE  |
| EVM0019935 | LG3 | Cysteine/Histidine-rich Cl do | not DE   | not DE   | not DE   | not DE  |
| EVM0023082 | LG3 | Cysteine/Histidine-rich Cl do | not DE   | not DE   | not DE   | not DE  |
| EVM0014034 | LG3 | Cytochrome P450, putative     | not DE   | not DE   | not DE   | not DE  |
| EVM0020887 | LG3 | Cytochrome P450, putative     | not DE   | not DE   | not DE   | not DE  |
| EVM0008940 | LG3 | Cytokinin oxidase             | not DE   | not DE   | not DE   | not DE  |
| EVM0021621 | LG3 | Cytokinin oxidase             | not DE   | not DE   | not DE   | not DE  |
| EVM0014374 | LG3 | DAG protein, chloroplast prec | not DE   | not DE   | not DE   | not DE  |
| EVM0001752 | LG3 | DNA polymerase III polC-type, | not DE   | not DE   | not DE   | not DE  |
| EVM0005891 | LG3 | DNA-directed RNA polymerase I | not DE   | not DE   | not DE   | not DE  |
| EVM0005506 | LG3 | DNA/RNA polymerases superfam  | not DE   | not DE   | not DE   | not DE  |
| EVM0018214 | LG3 | DNA/RNA polymerases superfam  | not DE   | not DE   | not DE   | not DE  |
| EVM0018550 | LG3 | DNA/RNA polymerases superfam  | not DE   | not DE   | not DE   | not DE  |
| EVM0023687 | LG3 | DNA/RNA polymerases superfam  | not DE   | not DE   | not DE   | not DE  |
| EVM0005469 | LG3 | DNAJ heat shock family protei | not DE   | not DE   | not DE   | not DE  |
| EVM0016084 | LG3 | Drm3-like protein isoform 1   | not DE   | not DE   | not DE   | not DE  |
| EVM0006853 | LG3 | EARLY FLOWERING 3             | 1.048486 | 0.000271 | not DE   | not DE  |
| EVM0022731 | LG3 | Electron transport complex pr | not DE   | not DE   | not DE   | not DE  |
| EVM0004970 | LG3 | Embryo sac development arrest | not DE   | not DE   | not DE   | not DE  |
| EVM0022520 | LG3 | Endochitinase PR4             | not DE   | not DE   | not DE   | not DE  |
| EVM0002171 | LG3 | Ethylene-responsive transcrip | not DE   | not DE   | not DE   | not DE  |
| EVM0000074 | LG3 | Eukaryotic aspartyl protease  | not DE   | not DE   | not DE   | not DE  |
| EVM0010682 | LG3 | Eukaryotic aspartyl protease  | not DE   | not DE   | -1.78272 | 0.00077 |
| EVM0003015 | LG3 | Eukaryotic translation initia | not DE   | not DE   | not DE   | not DE  |
| EVM0021526 | LG3 | Eukaryotic translation initia | not DE   | not DE   | not DE   | not DE  |
| EVM0002864 | LG3 | Exostosin family protein      | not DE   | not DE   | not DE   | not DE  |
| EVM0016290 | LG3 | Exostosin family protein, put | not DE   | not DE   | not DE   | not DE  |
| EVM0017862 | LG3 | F-box family protein          | not DE   | not DE   | not DE   | not DE  |
| EVM0023730 | LG3 | F-box family protein isoform  | not DE   | not DE   | not DE   | not DE  |
| EVM0010226 | LG3 | F1504.13                      | not DE   | not DE   | not DE   | not DE  |
| EVM0007140 | LG3 | Fatty acid biosynthesis 1 isc | not DE   | not DE   | not DE   | not DE  |
| EVM0007333 | LG3 | Flavin monooxygenase-like pro | not DE   | not DE   | not DE   | not DE  |
| EVM0021241 | LG3 | Flavin-binding monooxygenase  | not DE   | not DE   | not DE   | not DE  |
| EVM0024014 | LG3 | Flavin-dependent monooxygenas | not DE   | not DE   | not DE   | not DE  |
| EVM0022154 | LG3 | Formin-like protein 18        | not DE   | not DE   | not DE   | not DE  |
| EVM0012141 | LG3 | G-protein gamma subunit 2     | not DE   | not DE   | not DE   | not DE  |
| EVM0008784 | LG3 | GATA transcription factor 15  | not DE   | not DE   | not DE   | not DE  |
| EVM0000565 | LG3 | GDP-mannose 3,5-epimerase 1   | not DE   | not DE   | not DE   | not DE  |
| EVM0022243 | LG3 | GHMYB10                       | not DE   | not DE   | not DE   | not DE  |
| EVM0022537 | LG3 | GHMYB10                       | not DE   | not DE   | not DE   | not DE  |
| EVM0015617 | LG3 | GTP-binding SAR1A -like prote | not DE   | not DE   | not DE   | not DE  |
| EVM0001179 | LG3 | GTP-binding nuclear protein R | not DE   | not DE   | not DE   | not DE  |
| EVM0020443 | LG3 | Glucose and ribitol dehydroge | not DE   | not DE   | not DE   | not DE  |
| EVM0024392 | LG3 | Glycine-rich RNA-binding 2, m | not DE   | not DE   | not DE   | not DE  |
| EVM0001654 | LG3 | Glyoxalase 2-4                | -1.53498 | 1.61E-05 | not DE   | not DE  |
| EVM0022515 | LG3 | Golgin subfamily A member 4   | not DE   | not DE   | not DE   | not DE  |
| EVM0015445 | LG3 | H+-pyrophosphatase            | not DE   | not DE   | not DE   | not DE  |
| EVM0013690 | LG3 | Heme oxygenase-like, multi-he | not DE   | not DE   | not DE   | not DE  |

|            |     |                                 |          |          |          |         |
|------------|-----|---------------------------------|----------|----------|----------|---------|
| EVM0008698 | LG3 | Hydroxymethylglutaryl-CoA lyase | not DE   | not DE   | not DE   | not DE  |
| EVM0001923 | LG3 | Indole-3-acetic acid 7 isoform  | not DE   | not DE   | not DE   | not DE  |
| EVM0015724 | LG3 | Inorganic H pyrophosphatase f   | not DE   | not DE   | not DE   | not DE  |
| EVM0024530 | LG3 | Inorganic H pyrophosphatase f   | not DE   | not DE   | not DE   | not DE  |
| EVM0002907 | LG3 | Integrase-type DNA-binding su   | not DE   | not DE   | not DE   | not DE  |
| EVM0005327 | LG3 | Integrase-type DNA-binding su   | not DE   | not DE   | not DE   | not DE  |
| EVM0000657 | LG3 | Integrin-linked protein kinase  | not DE   | not DE   | not DE   | not DE  |
| EVM0003126 | LG3 | Integrin-linked protein kinase  | not DE   | not DE   | not DE   | not DE  |
| EVM0006761 | LG3 | JHL23J11.6                      | not DE   | not DE   | not DE   | not DE  |
| EVM0010779 | LG3 | JHL23J11.6                      | not DE   | not DE   | not DE   | not DE  |
| EVM0001723 | LG3 | Kinase superfamily protein      | not DE   | not DE   | not DE   | not DE  |
| EVM0006070 | LG3 | LEC14B family protein           | not DE   | not DE   | not DE   | not DE  |
| EVM0018568 | LG3 | LETM1 and EF-hand domain-cont   | not DE   | not DE   | not DE   | not DE  |
| EVM0019909 | LG3 | LETM1 and EF-hand domain-cont   | not DE   | not DE   | not DE   | not DE  |
| EVM0006538 | LG3 | Leucine-rich receptor-like pr   | not DE   | not DE   | not DE   | not DE  |
| EVM0011995 | LG3 | Leucine-rich repeat family pr   | not DE   | not DE   | not DE   | not DE  |
| EVM0020271 | LG3 | Major pollen allergen Car b 1   | not DE   | not DE   | not DE   | not DE  |
| EVM0019326 | LG3 | Mitochondrial ribosomal prote   | not DE   | not DE   | not DE   | not DE  |
| EVM0023918 | LG3 | Monogalactosyldiacylglycerol    | not DE   | not DE   | not DE   | not DE  |
| EVM0022873 | LG3 | MuDR family transposase isof    | not DE   | not DE   | not DE   | not DE  |
| EVM0021993 | LG3 | Multifunctional protein 2       | not DE   | not DE   | not DE   | not DE  |
| EVM0012697 | LG3 | Myb domain protein 13, putati   | not DE   | not DE   | not DE   | not DE  |
| EVM0006354 | LG3 | Myb domain protein 4, putativ   | not DE   | not DE   | not DE   | not DE  |
| EVM0013115 | LG3 | Myb domain protein 4, putativ   | -3.88326 | 0.001628 | not DE   | not DE  |
| EVM0004110 | LG3 | Myb domain protein 84, putati   | not DE   | not DE   | not DE   | not DE  |
| EVM0017271 | LG3 | NAD(P)H dehydrogenase 18        | -1.01115 | 0.002836 | 1.127643 | 0.00485 |
| EVM0019057 | LG3 | NADP-dependent glyceraldehyde   | -1.08151 | 0.042984 | not DE   | not DE  |
| EVM0002930 | LG3 | Nicotianamine synthase, putat   | not DE   | not DE   | not DE   | not DE  |
| EVM0001299 | LG3 | Nodulin MtN21 /EamA-like tran   | not DE   | not DE   | not DE   | not DE  |
| EVM0012898 | LG3 | Nodulin MtN3 family protein i   | not DE   | not DE   | not DE   | not DE  |
| EVM0015857 | LG3 | Nuclear transport factor 2 fa   | not DE   | not DE   | not DE   | not DE  |
| EVM0021899 | LG3 | Nucleotide-sugar transporter    | not DE   | not DE   | not DE   | not DE  |
| EVM0022295 | LG3 | Nucleotidyl transferase sup     | not DE   | not DE   | not DE   | not DE  |
| EVM0012199 | LG3 | O-acetylserine lyase B isof     | -1.0795  | 5.04E-07 | not DE   | not DE  |
| EVM0010043 | LG3 | Oligouridylate binding protei   | not DE   | not DE   | not DE   | not DE  |
| EVM0009237 | LG3 | P-loop containing nucleoside    | not DE   | not DE   | not DE   | not DE  |
| EVM0004081 | LG3 | Pathogenesis-related PR-1 typ   | not DE   | not DE   | not DE   | not DE  |
| EVM0014990 | LG3 | Pathogenesis-related PR-1 typ   | not DE   | not DE   | not DE   | not DE  |
| EVM0003106 | LG3 | Pathogenesis-related protein    | not DE   | not DE   | not DE   | not DE  |
| EVM0008726 | LG3 | Pectin lyase-like superfamily   | not DE   | not DE   | not DE   | not DE  |
| EVM0022151 | LG3 | Pectin lyase-like superfamily   | not DE   | not DE   | not DE   | not DE  |
| EVM0009962 | LG3 | Pectin lyase-like superfamily   | not DE   | not DE   | not DE   | not DE  |
| EVM0006458 | LG3 | Pectin methylesterase 3         | not DE   | not DE   | not DE   | not DE  |
| EVM0013945 | LG3 | Pectinesterase-2, putative      | not DE   | not DE   | not DE   | not DE  |
| EVM0013198 | LG3 | Pentatricopeptide (PPR) repea   | not DE   | not DE   | not DE   | not DE  |
| EVM0018465 | LG3 | Pentatricopeptide repeat (PPR   | not DE   | not DE   | not DE   | not DE  |
| EVM0020669 | LG3 | Pentatricopeptide repeat supe   | 2.715206 | 3.43E-07 | not DE   | not DE  |
| EVM0022238 | LG3 | Pentatricopeptide repeat supe   | not DE   | not DE   | not DE   | not DE  |
| EVM0010208 | LG3 | Peptide chain release factor    | not DE   | not DE   | not DE   | not DE  |
| EVM0017423 | LG3 | Peptide methionine sulfoxide    | not DE   | not DE   | not DE   | not DE  |
| EVM0008086 | LG3 | Peptide transporter PTR3-A -1   | not DE   | not DE   | not DE   | not DE  |
| EVM0009037 | LG3 | Peroxidase 27 precursor, puta   | not DE   | not DE   | not DE   | not DE  |
| EVM0021716 | LG3 | Peroxidase 27 precursor, puta   | not DE   | not DE   | not DE   | not DE  |
| EVM0007864 | LG3 | Peroxidase superfamily protei   | not DE   | not DE   | not DE   | not DE  |

|            |     |                                          |          |          |          |         |
|------------|-----|------------------------------------------|----------|----------|----------|---------|
| EVM0022089 | LG3 | Peroxisomal membrane 22 kDa              | not DE   | not DE   | not DE   | not DE  |
| EVM0009997 | LG3 | Phi class glutathione transferase        | not DE   | not DE   | not DE   | not DE  |
| EVM0019984 | LG3 | Phosphoenolpyruvate carboxylase          | not DE   | not DE   | not DE   | not DE  |
| EVM0014871 | LG3 | Phototropic-responsive NPH3 family       | not DE   | not DE   | not DE   | not DE  |
| EVM0018957 | LG3 | Phragmoplast orienting kinesin           | not DE   | not DE   | not DE   | not DE  |
| EVM0003382 | LG3 | Plant invertase/pectin methyltransferase | not DE   | not DE   | not DE   | not DE  |
| EVM0007034 | LG3 | Plant invertase/pectin methyltransferase | not DE   | not DE   | not DE   | not DE  |
| EVM0022685 | LG3 | Plant invertase/pectin methyltransferase | not DE   | not DE   | not DE   | not DE  |
| EVM0020027 | LG3 | Plant invertase/pectin methyltransferase | not DE   | not DE   | not DE   | not DE  |
| EVM0001731 | LG3 | Plant natriuretic peptide A              | not DE   | not DE   | not DE   | not DE  |
| EVM0003122 | LG3 | Polyketide cyclase/dehydrase             | not DE   | not DE   | not DE   | not DE  |
| EVM0010315 | LG3 | Prefoldin 3                              | not DE   | not DE   | not DE   | not DE  |
| EVM0008835 | LG3 | Protease Do-like 14, putative            | not DE   | not DE   | not DE   | not DE  |
| EVM0001567 | LG3 | Putative pectinesterase/pectinesterase   | not DE   | not DE   | not DE   | not DE  |
| EVM0004171 | LG3 | Putative pectinesterase/pectinesterase   | not DE   | not DE   | not DE   | not DE  |
| EVM0008673 | LG3 | Putative pectinesterase/pectinesterase   | not DE   | not DE   | not DE   | not DE  |
| EVM0024227 | LG3 | Putative pectinesterase/pectinesterase   | not DE   | not DE   | not DE   | not DE  |
| EVM0008492 | LG3 | Pyridoxal phosphate-dependent            | not DE   | not DE   | not DE   | not DE  |
| EVM0024628 | LG3 | RAD51 homolog                            | not DE   | not DE   | not DE   | not DE  |
| EVM0013339 | LG3 | RALFL33, putative                        | not DE   | not DE   | 1.355471 | 0.01926 |
| EVM0014254 | LG3 | RAN GTPase activating protein            | not DE   | not DE   | not DE   | not DE  |
| EVM0003611 | LG3 | RING/U-box superfamily protein           | not DE   | not DE   | not DE   | not DE  |
| EVM0007965 | LG3 | RING/U-box superfamily protein           | not DE   | not DE   | not DE   | not DE  |
| EVM0022495 | LG3 | RING/U-box superfamily protein           | not DE   | not DE   | not DE   | not DE  |
| EVM0016655 | LG3 | Radical SAM superfamily protein          | not DE   | not DE   | not DE   | not DE  |
| EVM0000689 | LG3 | Ras-related protein Rab-18-B             | not DE   | not DE   | not DE   | not DE  |
| EVM0005740 | LG3 | RecName: Full=S-adenosylmethionine       | not DE   | not DE   | not DE   | not DE  |
| EVM0015083 | LG3 | RecName: Full=S-adenosylmethionine       | not DE   | not DE   | -1.46278 | 0.0427  |
| EVM0012647 | LG3 | Receptor-like protein kinase             | not DE   | not DE   | not DE   | not DE  |
| EVM0009633 | LG3 | Regulator of chromosome condensation     | not DE   | not DE   | not DE   | not DE  |
| EVM0019675 | LG3 | Retrovirus-related Pol polyprotein       | not DE   | not DE   | not DE   | not DE  |
| EVM0009452 | LG3 | S-adenosyl-L-homocysteine hydrolase      | not DE   | not DE   | not DE   | not DE  |
| EVM0006578 | LG3 | S-adenosyl-L-methionine-dependent        | not DE   | not DE   | not DE   | not DE  |
| EVM0016370 | LG3 | S-adenosyl-L-methionine-dependent        | not DE   | not DE   | not DE   | not DE  |
| EVM0002621 | LG3 | SILENCING DEFECTIVE 1 family             | not DE   | not DE   | not DE   | not DE  |
| EVM0009856 | LG3 | SUP1                                     | not DE   | not DE   | not DE   | not DE  |
| EVM0005479 | LG3 | SWAP/surp domain-containing protein      | not DE   | not DE   | -1.09596 | #####   |
| EVM0022640 | LG3 | Serine hydroxymethyltransferase          | not DE   | not DE   | not DE   | not DE  |
| EVM0002638 | LG3 | Splicing factor 3B subunit, protein      | not DE   | not DE   | not DE   | not DE  |
| EVM0004545 | LG3 | Syntaxin-32-like protein                 | not DE   | not DE   | not DE   | not DE  |
| EVM0002229 | LG3 | Telomere-associated protein R            | not DE   | not DE   | not DE   | not DE  |
| EVM0001302 | LG3 | Tetrapyrrole-binding family protein      | not DE   | not DE   | not DE   | not DE  |
| EVM0003398 | LG3 | Tetratricopeptide repeat-like            | not DE   | not DE   | not DE   | not DE  |
| EVM0008983 | LG3 | Tetratricopeptide repeat-like            | 1.631263 | 0.038621 | not DE   | not DE  |
| EVM0001782 | LG3 | Transcriptional factor B3 family         | not DE   | not DE   | not DE   | not DE  |
| EVM0011347 | LG3 | Transducin/WD40 repeat-like              | not DE   | not DE   | not DE   | not DE  |
| EVM0020907 | LG3 | Transducin/WD40 repeat-like              | not DE   | not DE   | not DE   | not DE  |
| EVM0012272 | LG3 | Translation elongation factor            | not DE   | not DE   | not DE   | not DE  |
| EVM0001879 | LG3 | Translation initiation factor            | not DE   | not DE   | not DE   | not DE  |
| EVM0000371 | LG3 | Transmembrane proteins 14C               | -1.15037 | 6.14E-05 | not DE   | not DE  |
| EVM0020591 | LG3 | UDP-glucosyltransferase, putative        | not DE   | not DE   | not DE   | not DE  |
| EVM0001565 | LG3 | UDP-glycosyltransferase 89C1, protein    | not DE   | not DE   | not DE   | not DE  |
| EVM0011434 | LG3 | UDP-glycosyltransferase 89C1, protein    | not DE   | not DE   | not DE   | not DE  |
| EVM0013075 | LG3 | UDP-glycosyltransferase 89C1, protein    | not DE   | not DE   | not DE   | not DE  |

|            |     |                                  |          |          |          |         |
|------------|-----|----------------------------------|----------|----------|----------|---------|
| EVM0015464 | LG3 | UDP-glycosyltransferase 89C1,    | not DE   | not DE   | not DE   | not DE  |
| EVM0010281 | LG3 | UDP-glycosyltransferase 90A1     | not DE   | not DE   | not DE   | not DE  |
| EVM0010568 | LG3 | UDP-sugar transporter, putative  | not DE   | not DE   | not DE   | not DE  |
| EVM0017158 | LG3 | UDP-sugar transporter, putative  | not DE   | not DE   | not DE   | not DE  |
| EVM0011233 | LG3 | Uncharacterized RNA-binding p    | 1.112307 | 1.88E-12 | not DE   | not DE  |
| EVM0005851 | LG3 | Uncharacterized protein TCM_C    | not DE   | not DE   | not DE   | not DE  |
| EVM0002499 | LG3 | Uncharacterized protein TCM_C    | not DE   | not DE   | not DE   | not DE  |
| EVM0006224 | LG3 | Uncharacterized protein TCM_C    | -6.35798 | 0.006048 | not DE   | not DE  |
| EVM0008120 | LG3 | Uncharacterized protein TCM_C    | not DE   | not DE   | not DE   | not DE  |
| EVM0018124 | LG3 | Uncharacterized protein TCM_C    | not DE   | not DE   | not DE   | not DE  |
| EVM0000039 | LG3 | Uncharacterized protein TCM_C    | not DE   | not DE   | not DE   | not DE  |
| EVM0018563 | LG3 | Uncharacterized protein TCM_C    | not DE   | not DE   | not DE   | not DE  |
| EVM0001914 | LG3 | Uncharacterized protein TCM_C    | not DE   | not DE   | not DE   | not DE  |
| EVM0015564 | LG3 | Uncharacterized protein TCM_C    | not DE   | not DE   | not DE   | not DE  |
| EVM0015245 | LG3 | Uncharacterized protein TCM_C    | not DE   | not DE   | not DE   | not DE  |
| EVM0021954 | LG3 | Uncharacterized protein TCM_C    | not DE   | not DE   | not DE   | not DE  |
| EVM0010743 | LG3 | Uncharacterized protein TCM_C    | not DE   | not DE   | not DE   | not DE  |
| EVM0003531 | LG3 | Uncharacterized protein TCM_C    | not DE   | not DE   | not DE   | not DE  |
| EVM0007199 | LG3 | Uncharacterized protein TCM_C    | not DE   | not DE   | not DE   | not DE  |
| EVM0021551 | LG3 | Uncharacterized protein TCM_C    | not DE   | not DE   | not DE   | not DE  |
| EVM0013453 | LG3 | Uncharacterized protein TCM_C    | not DE   | not DE   | not DE   | not DE  |
| EVM0017088 | LG3 | Uncharacterized protein TCM_C    | not DE   | not DE   | not DE   | not DE  |
| EVM0015434 | LG3 | Uncharacterized protein TCM_C    | not DE   | not DE   | not DE   | not DE  |
| EVM0003444 | LG3 | Uncharacterized protein TCM_C    | not DE   | not DE   | not DE   | not DE  |
| EVM0001998 | LG3 | Uncharacterized protein isoform  | not DE   | not DE   | not DE   | not DE  |
| EVM0006261 | LG3 | Uncharacterized protein isoform  | not DE   | not DE   | not DE   | not DE  |
| EVM0010639 | LG3 | Uncharacterized protein isoform  | not DE   | not DE   | not DE   | not DE  |
| EVM0014112 | LG3 | Uncharacterized protein isoform  | not DE   | not DE   | not DE   | not DE  |
| EVM0015171 | LG3 | Uncharacterized protein isoform  | not DE   | not DE   | not DE   | not DE  |
| EVM0019215 | LG3 | Uncharacterized protein isoform  | not DE   | not DE   | not DE   | not DE  |
| EVM0019440 | LG3 | Uncharacterized protein isoform  | not DE   | not DE   | not DE   | not DE  |
| EVM0005792 | LG3 | Uveal autoantigen with coiled    | not DE   | not DE   | 1.332146 | 0.01099 |
| EVM0019882 | LG3 | Vesicle transport protein GOT    | not DE   | not DE   | not DE   | not DE  |
| EVM0010839 | LG3 | Vesicle-associated membrane p    | not DE   | not DE   | not DE   | not DE  |
| EVM0009035 | LG3 | WRKY transcription factor 2-7    | not DE   | not DE   | not DE   | not DE  |
| EVM0015392 | LG3 | WRKY transcription factor 31     | 2.178324 | 0.006552 | not DE   | not DE  |
| EVM0017358 | LG3 | Xyloglucan 6-xylosyltransfera    | -1.23574 | 7.29E-07 | not DE   | not DE  |
| EVM0021032 | LG3 | Yucca 3                          | not DE   | not DE   | not DE   | not DE  |
| EVM0008002 | LG3 | Zinc finger protein, putative    | not DE   | not DE   | not DE   | not DE  |
| EVM0009378 | LG3 | actin depolymerizing factor 4    | 1.212744 | 0.01502  | not DE   | not DE  |
| EVM0003350 | LG3 | acyltransferase, putative        | not DE   | not DE   | not DE   | not DE  |
| EVM0003865 | LG3 | autophagy-related protein 8h     | not DE   | not DE   | not DE   | not DE  |
| EVM0007830 | LG3 | beta-1,3-glucanase               | not DE   | not DE   | not DE   | not DE  |
| EVM0003258 | LG3 | beta-galactosidase               | not DE   | not DE   | not DE   | not DE  |
| EVM0017869 | LG3 | beta-galactosidase               | not DE   | not DE   | not DE   | not DE  |
| EVM0002734 | LG3 | calmodulin-binding family pro    | not DE   | not DE   | not DE   | not DE  |
| EVM0000701 | LG3 | ccr4-associated factor, putative | not DE   | not DE   | not DE   | not DE  |
| EVM0000430 | LG3 | chitinase                        | not DE   | not DE   | not DE   | not DE  |
| EVM0002563 | LG3 | chitinase                        | 7.940451 | 0.000599 | not DE   | not DE  |
| EVM0005445 | LG3 | chitinase                        | not DE   | not DE   | not DE   | not DE  |
| EVM0006283 | LG3 | chitinase                        | not DE   | not DE   | not DE   | not DE  |
| EVM0012291 | LG3 | chitinase                        | not DE   | not DE   | not DE   | not DE  |
| EVM0015598 | LG3 | chitinase                        | not DE   | not DE   | not DE   | not DE  |
| EVM0017574 | LG3 | chitinase                        | not DE   | not DE   | not DE   | not DE  |

|            |     |                               |          |          |          |         |
|------------|-----|-------------------------------|----------|----------|----------|---------|
| EVM0002021 | LG3 | chloride channel-like family  | not DE   | not DE   | not DE   | not DE  |
| EVM0023380 | LG3 | chloroplast alpha-glucan wate | not DE   | not DE   | not DE   | not DE  |
| EVM0005783 | LG3 | conserved hypothetical protei | not DE   | not DE   | not DE   | not DE  |
| EVM0006064 | LG3 | conserved hypothetical protei | not DE   | not DE   | 3.16236  | 0.01086 |
| EVM0006398 | LG3 | conserved hypothetical protei | not DE   | not DE   | not DE   | not DE  |
| EVM0007142 | LG3 | conserved hypothetical protei | not DE   | not DE   | not DE   | not DE  |
| EVM0008190 | LG3 | conserved hypothetical protei | not DE   | not DE   | not DE   | not DE  |
| EVM0008256 | LG3 | conserved hypothetical protei | not DE   | not DE   | not DE   | not DE  |
| EVM0008672 | LG3 | conserved hypothetical protei | not DE   | not DE   | not DE   | not DE  |
| EVM0015620 | LG3 | conserved hypothetical protei | not DE   | not DE   | not DE   | not DE  |
| EVM0015831 | LG3 | conserved hypothetical protei | not DE   | not DE   | not DE   | not DE  |
| EVM0017181 | LG3 | conserved hypothetical protei | not DE   | not DE   | not DE   | not DE  |
| EVM0017384 | LG3 | conserved hypothetical protei | not DE   | not DE   | not DE   | not DE  |
| EVM0017561 | LG3 | conserved hypothetical protei | not DE   | not DE   | not DE   | not DE  |
| EVM0018704 | LG3 | conserved hypothetical protei | not DE   | not DE   | not DE   | not DE  |
| EVM0018881 | LG3 | conserved hypothetical protei | not DE   | not DE   | not DE   | not DE  |
| EVM0019089 | LG3 | conserved hypothetical protei | not DE   | not DE   | not DE   | not DE  |
| EVM0022566 | LG3 | conserved hypothetical protei | not DE   | not DE   | not DE   | not DE  |
| EVM0021509 | LG3 | cryptochrome 2                | not DE   | not DE   | not DE   | not DE  |
| EVM0002498 | LG3 | cytokinin riboside 5&apos;-mo | not DE   | not DE   | not DE   | not DE  |
| EVM0019607 | LG3 | dihydrolipoamide dehydrogenas | not DE   | not DE   | not DE   | not DE  |
| EVM0010367 | LG3 | disease resistance-responsive | not DE   | not DE   | not DE   | not DE  |
| EVM0017355 | LG3 | embryonic flower 1            | 1.670994 | 3.44E-09 | not DE   | not DE  |
| EVM0002218 | LG3 | endo-1,3-1,4-beta-d-glucanase | not DE   | not DE   | not DE   | not DE  |
| EVM0006324 | LG3 | ethylene receptor family prot | not DE   | not DE   | not DE   | not DE  |
| EVM0016941 | LG3 | ferredoxin 1                  | -1.07669 | 0.011604 | not DE   | not DE  |
| EVM0024224 | LG3 | flowering time control protei | not DE   | not DE   | not DE   | not DE  |
| EVM0018611 | LG3 | gag-pol polyprotein           | not DE   | not DE   | not DE   | not DE  |
| EVM0015042 | LG3 | galactinol synthase           | not DE   | not DE   | not DE   | not DE  |
| EVM0019359 | LG3 | glutathione reductase         | 1.644554 | 0.004114 | not DE   | not DE  |
| EVM0009741 | LG3 | glutathione s-transferase, pu | not DE   | not DE   | not DE   | not DE  |
| EVM0000581 | LG3 | glutathione transferase, part | not DE   | not DE   | not DE   | not DE  |
| EVM0003413 | LG3 | glutathione transferase, part | not DE   | not DE   | not DE   | not DE  |
| EVM0009870 | LG3 | glutathione transferase, part | not DE   | not DE   | not DE   | not DE  |
| EVM0010612 | LG3 | glutathione transferase, part | not DE   | not DE   | not DE   | not DE  |
| EVM0013679 | LG3 | glutathione transferase, part | not DE   | not DE   | not DE   | not DE  |
| EVM0017596 | LG3 | glutathione transferase, part | not DE   | not DE   | not DE   | not DE  |
| EVM0017821 | LG3 | glutathione transferase, part | not DE   | not DE   | not DE   | not DE  |
| EVM0021317 | LG3 | glutathione transferase, part | not DE   | not DE   | not DE   | not DE  |
| EVM0009059 | LG3 | glycosyltransferase family 14 | not DE   | not DE   | not DE   | not DE  |
| EVM0010406 | LG3 | heat shock protein            | not DE   | not DE   | not DE   | not DE  |
| EVM0021781 | LG3 | heat shock protein 17.7       | -4.88861 | 1.44E-12 | -2.53864 | #####   |
| EVM0002873 | LG3 | hypothetical protein          | -3.23166 | 0.039771 | -2.56454 | 0.00693 |
| EVM0014521 | LG3 | hypothetical protein          | not DE   | not DE   | not DE   | not DE  |
| EVM0022099 | LG3 | hypothetical protein          | not DE   | not DE   | not DE   | not DE  |
| EVM0022234 | LG3 | hypothetical protein          | not DE   | not DE   | not DE   | not DE  |
| EVM0008625 | LG3 | hypothetical protein AALP_AA8 | not DE   | not DE   | not DE   | not DE  |
| EVM0020857 | LG3 | hypothetical protein AALP_AA8 | not DE   | not DE   | 1.260568 | #####   |
| EVM0001200 | LG3 | hypothetical protein AMTR_s03 | not DE   | not DE   | not DE   | not DE  |
| EVM0023825 | LG3 | hypothetical protein ARALYDRA | not DE   | not DE   | not DE   | not DE  |
| EVM0003527 | LG3 | hypothetical protein CICLE_v1 | not DE   | not DE   | not DE   | not DE  |
| EVM0013929 | LG3 | hypothetical protein CICLE_v1 | not DE   | not DE   | not DE   | not DE  |
| EVM0015028 | LG3 | hypothetical protein CICLE_v1 | not DE   | not DE   | not DE   | not DE  |
| EVM0022642 | LG3 | hypothetical protein CICLE_v1 | not DE   | not DE   | not DE   | not DE  |

|            |     |                               |          |          |          |         |
|------------|-----|-------------------------------|----------|----------|----------|---------|
| EVM0003583 | LG3 | hypothetical protein CICLE_v1 | not DE   | not DE   | -1.09071 | #####   |
| EVM0022331 | LG3 | hypothetical protein CICLE_v1 | not DE   | not DE   | not DE   | not DE  |
| EVM0015562 | LG3 | hypothetical protein CICLE_v1 | not DE   | not DE   | not DE   | not DE  |
| EVM0005382 | LG3 | hypothetical protein CICLE_v1 | not DE   | not DE   | not DE   | not DE  |
| EVM0016309 | LG3 | hypothetical protein CICLE_v1 | not DE   | not DE   | not DE   | not DE  |
| EVM0009143 | LG3 | hypothetical protein CICLE_v1 | not DE   | not DE   | not DE   | not DE  |
| EVM0012701 | LG3 | hypothetical protein CICLE_v1 | not DE   | not DE   | not DE   | not DE  |
| EVM0006730 | LG3 | hypothetical protein CICLE_v1 | 2.248123 | 0.000749 | not DE   | not DE  |
| EVM0006225 | LG3 | hypothetical protein CICLE_v1 | not DE   | not DE   | not DE   | not DE  |
| EVM0012369 | LG3 | hypothetical protein CICLE_v1 | not DE   | not DE   | not DE   | not DE  |
| EVM0004579 | LG3 | hypothetical protein CICLE_v1 | not DE   | not DE   | not DE   | not DE  |
| EVM0010978 | LG3 | hypothetical protein CICLE_v1 | not DE   | not DE   | not DE   | not DE  |
| EVM0009231 | LG3 | hypothetical protein CICLE_v1 | not DE   | not DE   | not DE   | not DE  |
| EVM0015752 | LG3 | hypothetical protein CICLE_v1 | not DE   | not DE   | not DE   | not DE  |
| EVM0023089 | LG3 | hypothetical protein CICLE_v1 | not DE   | not DE   | not DE   | not DE  |
| EVM0011559 | LG3 | hypothetical protein CICLE_v1 | not DE   | not DE   | not DE   | not DE  |
| EVM0018193 | LG3 | hypothetical protein CICLE_v1 | not DE   | not DE   | not DE   | not DE  |
| EVM0002541 | LG3 | hypothetical protein CICLE_v1 | not DE   | not DE   | not DE   | not DE  |
| EVM0006040 | LG3 | hypothetical protein CICLE_v1 | not DE   | not DE   | not DE   | not DE  |
| EVM0023688 | LG3 | hypothetical protein CICLE_v1 | not DE   | not DE   | not DE   | not DE  |
| EVM0014765 | LG3 | hypothetical protein CICLE_v1 | not DE   | not DE   | not DE   | not DE  |
| EVM0020946 | LG3 | hypothetical protein CICLE_v1 | not DE   | not DE   | not DE   | not DE  |
| EVM0014331 | LG3 | hypothetical protein CICLE_v1 | not DE   | not DE   | not DE   | not DE  |
| EVM0005130 | LG3 | hypothetical protein CICLE_v1 | -2.26132 | 0.000342 | not DE   | not DE  |
| EVM0023761 | LG3 | hypothetical protein CICLE_v1 | not DE   | not DE   | 1.004987 | 0.00956 |
| EVM0006555 | LG3 | hypothetical protein CICLE_v1 | not DE   | not DE   | not DE   | not DE  |
| EVM0016021 | LG3 | hypothetical protein CICLE_v1 | not DE   | not DE   | not DE   | not DE  |
| EVM0019315 | LG3 | hypothetical protein CICLE_v1 | not DE   | not DE   | not DE   | not DE  |
| EVM0004238 | LG3 | hypothetical protein CICLE_v1 | 2.570567 | 0.024026 | not DE   | not DE  |
| EVM0008800 | LG3 | hypothetical protein CICLE_v1 | 2.448341 | 0.00811  | not DE   | not DE  |
| EVM0004213 | LG3 | hypothetical protein CICLE_v1 | not DE   | not DE   | not DE   | not DE  |
| EVM0022140 | LG3 | hypothetical protein CICLE_v1 | 1.416811 | 0.027229 | not DE   | not DE  |
| EVM0004617 | LG3 | hypothetical protein CICLE_v1 | 3.511277 | 0.000462 | not DE   | not DE  |
| EVM0011574 | LG3 | hypothetical protein CICLE_v1 | not DE   | not DE   | not DE   | not DE  |
| EVM0014261 | LG3 | hypothetical protein CICLE_v1 | not DE   | not DE   | not DE   | not DE  |
| EVM0018886 | LG3 | hypothetical protein CICLE_v1 | not DE   | not DE   | not DE   | not DE  |
| EVM0017509 | LG3 | hypothetical protein CICLE_v1 | not DE   | not DE   | not DE   | not DE  |
| EVM0006952 | LG3 | hypothetical protein CICLE_v1 | not DE   | not DE   | not DE   | not DE  |
| EVM0016709 | LG3 | hypothetical protein CICLE_v1 | 1.709846 | 5.93E-12 | not DE   | not DE  |
| EVM0008476 | LG3 | hypothetical protein CICLE_v1 | 1.166023 | 0.022616 | not DE   | not DE  |
| EVM0002555 | LG3 | hypothetical protein CICLE_v1 | not DE   | not DE   | not DE   | not DE  |
| EVM0015807 | LG3 | hypothetical protein CICLE_v1 | not DE   | not DE   | not DE   | not DE  |
| EVM0019433 | LG3 | hypothetical protein CICLE_v1 | not DE   | not DE   | not DE   | not DE  |
| EVM0004268 | LG3 | hypothetical protein CICLE_v1 | not DE   | not DE   | not DE   | not DE  |
| EVM0000097 | LG3 | hypothetical protein CICLE_v1 | not DE   | not DE   | not DE   | not DE  |
| EVM0021041 | LG3 | hypothetical protein CICLE_v1 | not DE   | not DE   | not DE   | not DE  |
| EVM0023243 | LG3 | hypothetical protein CICLE_v1 | not DE   | not DE   | not DE   | not DE  |
| EVM0001406 | LG3 | hypothetical protein CICLE_v1 | not DE   | not DE   | not DE   | not DE  |
| EVM0010796 | LG3 | hypothetical protein CICLE_v1 | not DE   | not DE   | 1.328012 | 0.00343 |
| EVM0011308 | LG3 | hypothetical protein CICLE_v1 | not DE   | not DE   | not DE   | not DE  |
| EVM0014857 | LG3 | hypothetical protein CICLE_v1 | -1.45446 | 0.035255 | not DE   | not DE  |
| EVM0015969 | LG3 | hypothetical protein CICLE_v1 | -1.2314  | 0.019851 | not DE   | not DE  |
| EVM0024157 | LG3 | hypothetical protein CICLE_v1 | -1.26118 | 0.021685 | not DE   | not DE  |
| EVM0007927 | LG3 | hypothetical protein CICLE_v1 | not DE   | not DE   | not DE   | not DE  |



|            |     |                               |          |          |          |         |
|------------|-----|-------------------------------|----------|----------|----------|---------|
| EVM0012057 | LG3 | hypothetical protein CICLE_v1 | not DE   | not DE   | not DE   | not DE  |
| EVM0019962 | LG3 | hypothetical protein CICLE_v1 | not DE   | not DE   | not DE   | not DE  |
| EVM0020173 | LG3 | hypothetical protein CICLE_v1 | not DE   | not DE   | not DE   | not DE  |
| EVM0004459 | LG3 | hypothetical protein CICLE_v1 | not DE   | not DE   | not DE   | not DE  |
| EVM0024032 | LG3 | hypothetical protein CICLE_v1 | not DE   | not DE   | not DE   | not DE  |
| EVM0001288 | LG3 | hypothetical protein CICLE_v1 | not DE   | not DE   | not DE   | not DE  |
| EVM0009927 | LG3 | hypothetical protein CICLE_v1 | not DE   | not DE   | not DE   | not DE  |
| EVM0003393 | LG3 | hypothetical protein CICLE_v1 | not DE   | not DE   | not DE   | not DE  |
| EVM0013344 | LG3 | hypothetical protein CICLE_v1 | not DE   | not DE   | not DE   | not DE  |
| EVM0020935 | LG3 | hypothetical protein CICLE_v1 | not DE   | not DE   | not DE   | not DE  |
| EVM0000796 | LG3 | hypothetical protein CICLE_v1 | not DE   | not DE   | not DE   | not DE  |
| EVM0023707 | LG3 | hypothetical protein CICLE_v1 | not DE   | not DE   | not DE   | not DE  |
| EVM0003584 | LG3 | hypothetical protein CICLE_v1 | not DE   | not DE   | not DE   | not DE  |
| EVM0007063 | LG3 | hypothetical protein CICLE_v1 | not DE   | not DE   | not DE   | not DE  |
| EVM0022971 | LG3 | hypothetical protein CICLE_v1 | not DE   | not DE   | not DE   | not DE  |
| EVM0010859 | LG3 | hypothetical protein CICLE_v1 | not DE   | not DE   | not DE   | not DE  |
| EVM0014829 | LG3 | hypothetical protein CICLE_v1 | not DE   | not DE   | not DE   | not DE  |
| EVM0020011 | LG3 | hypothetical protein CICLE_v1 | not DE   | not DE   | not DE   | not DE  |
| EVM0006307 | LG3 | hypothetical protein CICLE_v1 | not DE   | not DE   | not DE   | not DE  |
| EVM0007996 | LG3 | hypothetical protein CICLE_v1 | not DE   | not DE   | not DE   | not DE  |
| EVM0012569 | LG3 | hypothetical protein CICLE_v1 | not DE   | not DE   | not DE   | not DE  |
| EVM0016597 | LG3 | hypothetical protein CICLE_v1 | not DE   | not DE   | not DE   | not DE  |
| EVM0003629 | LG3 | hypothetical protein CICLE_v1 | not DE   | not DE   | not DE   | not DE  |
| EVM0017167 | LG3 | hypothetical protein CICLE_v1 | not DE   | not DE   | not DE   | not DE  |
| EVM0019428 | LG3 | hypothetical protein CICLE_v1 | not DE   | not DE   | not DE   | not DE  |
| EVM0014655 | LG3 | hypothetical protein CICLE_v1 | not DE   | not DE   | not DE   | not DE  |
| EVM0008264 | LG3 | hypothetical protein CICLE_v1 | not DE   | not DE   | not DE   | not DE  |
| EVM0011957 | LG3 | hypothetical protein CICLE_v1 | not DE   | not DE   | not DE   | not DE  |
| EVM0014013 | LG3 | hypothetical protein CICLE_v1 | not DE   | not DE   | not DE   | not DE  |
| EVM0021013 | LG3 | hypothetical protein CICLE_v1 | not DE   | not DE   | not DE   | not DE  |
| EVM0022649 | LG3 | hypothetical protein CICLE_v1 | not DE   | not DE   | not DE   | not DE  |
| EVM0017145 | LG3 | hypothetical protein CICLE_v1 | not DE   | not DE   | not DE   | not DE  |
| EVM0020006 | LG3 | hypothetical protein CICLE_v1 | not DE   | not DE   | not DE   | not DE  |
| EVM0022329 | LG3 | hypothetical protein CICLE_v1 | not DE   | not DE   | not DE   | not DE  |
| EVM0006060 | LG3 | hypothetical protein CICLE_v1 | not DE   | not DE   | not DE   | not DE  |
| EVM0024619 | LG3 | hypothetical protein CICLE_v1 | not DE   | not DE   | not DE   | not DE  |
| EVM0004569 | LG3 | hypothetical protein CICLE_v1 | not DE   | not DE   | not DE   | not DE  |
| EVM0017106 | LG3 | hypothetical protein CICLE_v1 | 1.174437 | 0.003395 | not DE   | not DE  |
| EVM0009831 | LG3 | hypothetical protein CICLE_v1 | not DE   | not DE   | -1.08357 | 0.00443 |
| EVM0018490 | LG3 | hypothetical protein CICLE_v1 | not DE   | not DE   | not DE   | not DE  |
| EVM0007911 | LG3 | hypothetical protein CICLE_v1 | not DE   | not DE   | not DE   | not DE  |
| EVM0021594 | LG3 | hypothetical protein CICLE_v1 | not DE   | not DE   | not DE   | not DE  |
| EVM0010277 | LG3 | hypothetical protein CICLE_v1 | not DE   | not DE   | not DE   | not DE  |
| EVM0001128 | LG3 | hypothetical protein CICLE_v1 | not DE   | not DE   | not DE   | not DE  |
| EVM0011406 | LG3 | hypothetical protein CICLE_v1 | not DE   | not DE   | not DE   | not DE  |
| EVM0024050 | LG3 | hypothetical protein CICLE_v1 | not DE   | not DE   | not DE   | not DE  |
| EVM0004882 | LG3 | hypothetical protein CICLE_v1 | not DE   | not DE   | not DE   | not DE  |
| EVM0016748 | LG3 | hypothetical protein CICLE_v1 | not DE   | not DE   | not DE   | not DE  |
| EVM0015744 | LG3 | hypothetical protein CICLE_v1 | not DE   | not DE   | not DE   | not DE  |
| EVM0002661 | LG3 | hypothetical protein CICLE_v1 | not DE   | not DE   | not DE   | not DE  |
| EVM0023881 | LG3 | hypothetical protein CICLE_v1 | not DE   | not DE   | not DE   | not DE  |
| EVM0011732 | LG3 | hypothetical protein CICLE_v1 | not DE   | not DE   | not DE   | not DE  |
| EVM0009081 | LG3 | hypothetical protein CICLE_v1 | not DE   | not DE   | not DE   | not DE  |
| EVM0001334 | LG3 | hypothetical protein CICLE_v1 | not DE   | not DE   | not DE   | not DE  |

|            |     |                               |          |          |          |         |
|------------|-----|-------------------------------|----------|----------|----------|---------|
| EVM0017549 | LG3 | hypothetical protein CICLE_v1 | not DE   | not DE   | not DE   | not DE  |
| EVM0007082 | LG3 | hypothetical protein CICLE_v1 | not DE   | not DE   | not DE   | not DE  |
| EVM0009329 | LG3 | hypothetical protein CICLE_v1 | not DE   | not DE   | not DE   | not DE  |
| EVM0020195 | LG3 | hypothetical protein CICLE_v1 | not DE   | not DE   | not DE   | not DE  |
| EVM0004963 | LG3 | hypothetical protein CICLE_v1 | not DE   | not DE   | not DE   | not DE  |
| EVM0002902 | LG3 | hypothetical protein CICLE_v1 | not DE   | not DE   | not DE   | not DE  |
| EVM0001566 | LG3 | hypothetical protein CICLE_v1 | not DE   | not DE   | not DE   | not DE  |
| EVM0004258 | LG3 | hypothetical protein CICLE_v1 | not DE   | not DE   | not DE   | not DE  |
| EVM0006094 | LG3 | hypothetical protein CICLE_v1 | 1.724635 | 0.014605 | not DE   | not DE  |
| EVM0018413 | LG3 | hypothetical protein CICLE_v1 | not DE   | not DE   | not DE   | not DE  |
| EVM0013639 | LG3 | hypothetical protein CICLE_v1 | 2.554188 | 0.000815 | not DE   | not DE  |
| EVM0014622 | LG3 | hypothetical protein CICLE_v1 | not DE   | not DE   | not DE   | not DE  |
| EVM0005341 | LG3 | hypothetical protein CICLE_v1 | not DE   | not DE   | not DE   | not DE  |
| EVM0001095 | LG3 | hypothetical protein CICLE_v1 | not DE   | not DE   | not DE   | not DE  |
| EVM0006133 | LG3 | hypothetical protein CICLE_v1 | 4.410196 | 0.039199 | not DE   | not DE  |
| EVM0024638 | LG3 | hypothetical protein CICLE_v1 | not DE   | not DE   | not DE   | not DE  |
| EVM0022293 | LG3 | hypothetical protein CICLE_v1 | not DE   | not DE   | not DE   | not DE  |
| EVM0020376 | LG3 | hypothetical protein CICLE_v1 | not DE   | not DE   | not DE   | not DE  |
| EVM0006797 | LG3 | hypothetical protein CICLE_v1 | not DE   | not DE   | not DE   | not DE  |
| EVM0008043 | LG3 | hypothetical protein CICLE_v1 | not DE   | not DE   | not DE   | not DE  |
| EVM0017052 | LG3 | hypothetical protein CICLE_v1 | not DE   | not DE   | not DE   | not DE  |
| EVM0002255 | LG3 | hypothetical protein CICLE_v1 | not DE   | not DE   | not DE   | not DE  |
| EVM0005330 | LG3 | hypothetical protein CICLE_v1 | not DE   | not DE   | not DE   | not DE  |
| EVM0010035 | LG3 | hypothetical protein CICLE_v1 | not DE   | not DE   | not DE   | not DE  |
| EVM0001046 | LG3 | hypothetical protein CICLE_v1 | not DE   | not DE   | not DE   | not DE  |
| EVM0002612 | LG3 | hypothetical protein CICLE_v1 | not DE   | not DE   | not DE   | not DE  |
| EVM0009593 | LG3 | hypothetical protein CICLE_v1 | not DE   | not DE   | not DE   | not DE  |
| EVM0021489 | LG3 | hypothetical protein CICLE_v1 | not DE   | not DE   | -1.02234 | 0.0032  |
| EVM0008855 | LG3 | hypothetical protein CICLE_v1 | not DE   | not DE   | not DE   | not DE  |
| EVM0014710 | LG3 | hypothetical protein CICLE_v1 | not DE   | not DE   | not DE   | not DE  |
| EVM0007382 | LG3 | hypothetical protein CICLE_v1 | not DE   | not DE   | not DE   | not DE  |
| EVM0007101 | LG3 | hypothetical protein CICLE_v1 | not DE   | not DE   | not DE   | not DE  |
| EVM0012406 | LG3 | hypothetical protein CICLE_v1 | not DE   | not DE   | not DE   | not DE  |
| EVM0008338 | LG3 | hypothetical protein CICLE_v1 | not DE   | not DE   | not DE   | not DE  |
| EVM0011709 | LG3 | hypothetical protein CICLE_v1 | not DE   | not DE   | 2.788103 | 0.03267 |
| EVM0017935 | LG3 | hypothetical protein CICLE_v1 | not DE   | not DE   | not DE   | not DE  |
| EVM0018284 | LG3 | hypothetical protein CICLE_v1 | not DE   | not DE   | not DE   | not DE  |
| EVM0007630 | LG3 | hypothetical protein CICLE_v1 | not DE   | not DE   | not DE   | not DE  |
| EVM0011169 | LG3 | hypothetical protein CICLE_v1 | not DE   | not DE   | not DE   | not DE  |
| EVM0015357 | LG3 | hypothetical protein CICLE_v1 | not DE   | not DE   | not DE   | not DE  |
| EVM0022157 | LG3 | hypothetical protein CICLE_v1 | 2.876569 | 0.038739 | not DE   | not DE  |
| EVM0011143 | LG3 | hypothetical protein CICLE_v1 | not DE   | not DE   | not DE   | not DE  |
| EVM0006866 | LG3 | hypothetical protein CICLE_v1 | not DE   | not DE   | not DE   | not DE  |
| EVM0019085 | LG3 | hypothetical protein CICLE_v1 | not DE   | not DE   | not DE   | not DE  |
| EVM0021933 | LG3 | hypothetical protein CICLE_v1 | not DE   | not DE   | not DE   | not DE  |
| EVM0022859 | LG3 | hypothetical protein CICLE_v1 | not DE   | not DE   | not DE   | not DE  |
| EVM0015354 | LG3 | hypothetical protein CICLE_v1 | not DE   | not DE   | not DE   | not DE  |
| EVM0023892 | LG3 | hypothetical protein CICLE_v1 | not DE   | not DE   | -2.14138 | 0.01658 |
| EVM0022712 | LG3 | hypothetical protein CICLE_v1 | not DE   | not DE   | -4.49309 | 0.01191 |
| EVM0000372 | LG3 | hypothetical protein CICLE_v1 | not DE   | not DE   | not DE   | not DE  |
| EVM0010155 | LG3 | hypothetical protein CICLE_v1 | not DE   | not DE   | not DE   | not DE  |
| EVM0022941 | LG3 | hypothetical protein CICLE_v1 | not DE   | not DE   | not DE   | not DE  |
| EVM0019967 | LG3 | hypothetical protein CICLE_v1 | not DE   | not DE   | not DE   | not DE  |
| EVM0001514 | LG3 | hypothetical protein CICLE_v1 | not DE   | not DE   | not DE   | not DE  |

|            |     |                               |          |          |          |         |
|------------|-----|-------------------------------|----------|----------|----------|---------|
| EVM0006429 | LG3 | hypothetical protein CICLE_v1 | not DE   | not DE   | not DE   | not DE  |
| EVM0012510 | LG3 | hypothetical protein CICLE_v1 | not DE   | not DE   | not DE   | not DE  |
| EVM0024172 | LG3 | hypothetical protein CICLE_v1 | not DE   | not DE   | not DE   | not DE  |
| EVM0014496 | LG3 | hypothetical protein CICLE_v1 | not DE   | not DE   | not DE   | not DE  |
| EVM0014270 | LG3 | hypothetical protein CICLE_v1 | 1.623455 | 7.27E-05 | not DE   | not DE  |
| EVM0013377 | LG3 | hypothetical protein CICLE_v1 | not DE   | not DE   | not DE   | not DE  |
| EVM0009704 | LG3 | hypothetical protein CICLE_v1 | not DE   | not DE   | not DE   | not DE  |
| EVM0021632 | LG3 | hypothetical protein CICLE_v1 | not DE   | not DE   | not DE   | not DE  |
| EVM0017578 | LG3 | hypothetical protein CICLE_v1 | not DE   | not DE   | not DE   | not DE  |
| EVM0024023 | LG3 | hypothetical protein CICLE_v1 | not DE   | not DE   | not DE   | not DE  |
| EVM0017838 | LG3 | hypothetical protein CICLE_v1 | not DE   | not DE   | not DE   | not DE  |
| EVM0001785 | LG3 | hypothetical protein CICLE_v1 | not DE   | not DE   | not DE   | not DE  |
| EVM0023323 | LG3 | hypothetical protein CICLE_v1 | not DE   | not DE   | not DE   | not DE  |
| EVM0023689 | LG3 | hypothetical protein CICLE_v1 | not DE   | not DE   | not DE   | not DE  |
| EVM0007363 | LG3 | hypothetical protein CICLE_v1 | not DE   | not DE   | not DE   | not DE  |
| EVM0002214 | LG3 | hypothetical protein CICLE_v1 | not DE   | not DE   | not DE   | not DE  |
| EVM0001377 | LG3 | hypothetical protein CICLE_v1 | not DE   | not DE   | not DE   | not DE  |
| EVM0014320 | LG3 | hypothetical protein CICLE_v1 | not DE   | not DE   | not DE   | not DE  |
| EVM0012786 | LG3 | hypothetical protein CICLE_v1 | -1.38737 | 0.018592 | not DE   | not DE  |
| EVM0003792 | LG3 | hypothetical protein CICLE_v1 | -2.1351  | 0.000571 | not DE   | not DE  |
| EVM0004003 | LG3 | hypothetical protein CICLE_v1 | not DE   | not DE   | not DE   | not DE  |
| EVM0017475 | LG3 | hypothetical protein CICLE_v1 | not DE   | not DE   | not DE   | not DE  |
| EVM0019317 | LG3 | hypothetical protein CICLE_v1 | not DE   | not DE   | not DE   | not DE  |
| EVM0007561 | LG3 | hypothetical protein CICLE_v1 | not DE   | not DE   | not DE   | not DE  |
| EVM0000002 | LG3 | hypothetical protein CICLE_v1 | not DE   | not DE   | not DE   | not DE  |
| EVM0017805 | LG3 | hypothetical protein CICLE_v1 | 2.470872 | 0.001501 | not DE   | not DE  |
| EVM0003961 | LG3 | hypothetical protein CICLE_v1 | not DE   | not DE   | not DE   | not DE  |
| EVM0002192 | LG3 | hypothetical protein CICLE_v1 | not DE   | not DE   | not DE   | not DE  |
| EVM0008590 | LG3 | hypothetical protein CICLE_v1 | not DE   | not DE   | not DE   | not DE  |
| EVM0010331 | LG3 | hypothetical protein CICLE_v1 | not DE   | not DE   | not DE   | not DE  |
| EVM0020955 | LG3 | hypothetical protein CICLE_v1 | not DE   | not DE   | not DE   | not DE  |
| EVM0023567 | LG3 | hypothetical protein CICLE_v1 | not DE   | not DE   | not DE   | not DE  |
| EVM0023093 | LG3 | hypothetical protein CICLE_v1 | not DE   | not DE   | not DE   | not DE  |
| EVM0009971 | LG3 | hypothetical protein CICLE_v1 | not DE   | not DE   | not DE   | not DE  |
| EVM0024442 | LG3 | hypothetical protein CICLE_v1 | not DE   | not DE   | not DE   | not DE  |
| EVM0002667 | LG3 | hypothetical protein CICLE_v1 | not DE   | not DE   | not DE   | not DE  |
| EVM0012643 | LG3 | hypothetical protein CICLE_v1 | not DE   | not DE   | not DE   | not DE  |
| EVM0020663 | LG3 | hypothetical protein CICLE_v1 | not DE   | not DE   | not DE   | not DE  |
| EVM0002081 | LG3 | hypothetical protein CICLE_v1 | not DE   | not DE   | not DE   | not DE  |
| EVM0015825 | LG3 | hypothetical protein CICLE_v1 | not DE   | not DE   | not DE   | not DE  |
| EVM0008895 | LG3 | hypothetical protein CICLE_v1 | not DE   | not DE   | not DE   | not DE  |
| EVM0018574 | LG3 | hypothetical protein CICLE_v1 | 2.250995 | 0.034064 | -1.77574 | 0.02011 |
| EVM0009988 | LG3 | hypothetical protein CICLE_v1 | not DE   | not DE   | not DE   | not DE  |
| EVM0005035 | LG3 | hypothetical protein CICLE_v1 | not DE   | not DE   | not DE   | not DE  |
| EVM0016841 | LG3 | hypothetical protein CICLE_v1 | not DE   | not DE   | not DE   | not DE  |
| EVM0007143 | LG3 | hypothetical protein CICLE_v1 | not DE   | not DE   | not DE   | not DE  |
| EVM0020959 | LG3 | hypothetical protein CICLE_v1 | not DE   | not DE   | not DE   | not DE  |
| EVM0007119 | LG3 | hypothetical protein CICLE_v1 | not DE   | not DE   | not DE   | not DE  |
| EVM0012866 | LG3 | hypothetical protein CICLE_v1 | not DE   | not DE   | not DE   | not DE  |
| EVM0012209 | LG3 | hypothetical protein CICLE_v1 | not DE   | not DE   | not DE   | not DE  |
| EVM0023557 | LG3 | hypothetical protein CICLE_v1 | not DE   | not DE   | not DE   | not DE  |
| EVM0018210 | LG3 | hypothetical protein CICLE_v1 | not DE   | not DE   | not DE   | not DE  |
| EVM0021439 | LG3 | hypothetical protein CICLE_v1 | not DE   | not DE   | not DE   | not DE  |
| EVM0007664 | LG3 | hypothetical protein CICLE_v1 | not DE   | not DE   | not DE   | not DE  |

|            |     |                               |          |          |          |         |
|------------|-----|-------------------------------|----------|----------|----------|---------|
| EVM0001439 | LG3 | hypothetical protein CICLE_v1 | not DE   | not DE   | not DE   | not DE  |
| EVM0016453 | LG3 | hypothetical protein CICLE_v1 | not DE   | not DE   | not DE   | not DE  |
| EVM0004792 | LG3 | hypothetical protein CICLE_v1 | not DE   | not DE   | not DE   | not DE  |
| EVM0002411 | LG3 | hypothetical protein CICLE_v1 | not DE   | not DE   | not DE   | not DE  |
| EVM0011251 | LG3 | hypothetical protein CICLE_v1 | not DE   | not DE   | not DE   | not DE  |
| EVM0012133 | LG3 | hypothetical protein CICLE_v1 | 1.302032 | 0.040708 | not DE   | not DE  |
| EVM0005754 | LG3 | hypothetical protein CICLE_v1 | not DE   | not DE   | not DE   | not DE  |
| EVM0001193 | LG3 | hypothetical protein CICLE_v1 | not DE   | not DE   | not DE   | not DE  |
| EVM0014406 | LG3 | hypothetical protein CICLE_v1 | not DE   | not DE   | not DE   | not DE  |
| EVM0001863 | LG3 | hypothetical protein CICLE_v1 | not DE   | not DE   | not DE   | not DE  |
| EVM0020334 | LG3 | hypothetical protein CICLE_v1 | not DE   | not DE   | not DE   | not DE  |
| EVM0014219 | LG3 | hypothetical protein CICLE_v1 | not DE   | not DE   | not DE   | not DE  |
| EVM0022101 | LG3 | hypothetical protein CICLE_v1 | not DE   | not DE   | not DE   | not DE  |
| EVM0010175 | LG3 | hypothetical protein CICLE_v1 | not DE   | not DE   | not DE   | not DE  |
| EVM0008281 | LG3 | hypothetical protein CICLE_v1 | not DE   | not DE   | 1.954074 | 0.03344 |
| EVM0015322 | LG3 | hypothetical protein CICLE_v1 | not DE   | not DE   | not DE   | not DE  |
| EVM0019741 | LG3 | hypothetical protein CICLE_v1 | 1.334589 | 1.43E-05 | not DE   | not DE  |
| EVM0000887 | LG3 | hypothetical protein CICLE_v1 | not DE   | not DE   | not DE   | not DE  |
| EVM0012996 | LG3 | hypothetical protein CICLE_v1 | not DE   | not DE   | not DE   | not DE  |
| EVM0020691 | LG3 | hypothetical protein CICLE_v1 | not DE   | not DE   | not DE   | not DE  |
| EVM0021183 | LG3 | hypothetical protein CICLE_v1 | not DE   | not DE   | not DE   | not DE  |
| EVM0017418 | LG3 | hypothetical protein CICLE_v1 | not DE   | not DE   | 1.728491 | 0.04106 |
| EVM0018255 | LG3 | hypothetical protein CICLE_v1 | not DE   | not DE   | not DE   | not DE  |
| EVM0011282 | LG3 | hypothetical protein CICLE_v1 | not DE   | not DE   | not DE   | not DE  |
| EVM0022670 | LG3 | hypothetical protein CICLE_v1 | not DE   | not DE   | not DE   | not DE  |
| EVM0008566 | LG3 | hypothetical protein CICLE_v1 | not DE   | not DE   | not DE   | not DE  |
| EVM0012897 | LG3 | hypothetical protein CICLE_v1 | not DE   | not DE   | not DE   | not DE  |
| EVM0018004 | LG3 | hypothetical protein CICLE_v1 | not DE   | not DE   | 1.338747 | 0.00015 |
| EVM0000171 | LG3 | hypothetical protein CICLE_v1 | 2.76048  | 0.004955 | 2.172474 | #####   |
| EVM0002785 | LG3 | hypothetical protein CICLE_v1 | 1.559172 | 0.035231 | not DE   | not DE  |
| EVM0005559 | LG3 | hypothetical protein CICLE_v1 | not DE   | not DE   | not DE   | not DE  |
| EVM0014458 | LG3 | hypothetical protein CICLE_v1 | not DE   | not DE   | not DE   | not DE  |
| EVM0017783 | LG3 | hypothetical protein CICLE_v1 | not DE   | not DE   | not DE   | not DE  |
| EVM0017340 | LG3 | hypothetical protein CICLE_v1 | not DE   | not DE   | not DE   | not DE  |
| EVM0018459 | LG3 | hypothetical protein CICLE_v1 | not DE   | not DE   | not DE   | not DE  |
| EVM0018035 | LG3 | hypothetical protein CICLE_v1 | not DE   | not DE   | not DE   | not DE  |
| EVM0006382 | LG3 | hypothetical protein CICLE_v1 | not DE   | not DE   | 1.610488 | #####   |
| EVM0007553 | LG3 | hypothetical protein CICLE_v1 | not DE   | not DE   | not DE   | not DE  |
| EVM0016546 | LG3 | hypothetical protein CICLE_v1 | not DE   | not DE   | 2.169898 | 0.02235 |
| EVM0012955 | LG3 | hypothetical protein CICLE_v1 | not DE   | not DE   | not DE   | not DE  |
| EVM0000033 | LG3 | hypothetical protein CICLE_v1 | not DE   | not DE   | not DE   | not DE  |
| EVM0003840 | LG3 | hypothetical protein CICLE_v1 | not DE   | not DE   | not DE   | not DE  |
| EVM0021332 | LG3 | hypothetical protein CICLE_v1 | not DE   | not DE   | not DE   | not DE  |
| EVM0001269 | LG3 | hypothetical protein CICLE_v1 | not DE   | not DE   | not DE   | not DE  |
| EVM0004815 | LG3 | hypothetical protein CICLE_v1 | not DE   | not DE   | not DE   | not DE  |
| EVM0010671 | LG3 | hypothetical protein CICLE_v1 | not DE   | not DE   | not DE   | not DE  |
| EVM0015938 | LG3 | hypothetical protein CICLE_v1 | not DE   | not DE   | 1.002269 | 0.00083 |
| EVM0009266 | LG3 | hypothetical protein CICLE_v1 | not DE   | not DE   | not DE   | not DE  |
| EVM0006971 | LG3 | hypothetical protein CICLE_v1 | not DE   | not DE   | not DE   | not DE  |
| EVM0017342 | LG3 | hypothetical protein CICLE_v1 | not DE   | not DE   | not DE   | not DE  |
| EVM0018436 | LG3 | hypothetical protein CICLE_v1 | not DE   | not DE   | not DE   | not DE  |
| EVM0007454 | LG3 | hypothetical protein CICLE_v1 | 1.00112  | 0.026448 | not DE   | not DE  |
| EVM0009109 | LG3 | hypothetical protein CICLE_v1 | not DE   | not DE   | not DE   | not DE  |
| EVM0003785 | LG3 | hypothetical protein CICLE_v1 | not DE   | not DE   | not DE   | not DE  |



|            |     |                               |          |          |        |        |
|------------|-----|-------------------------------|----------|----------|--------|--------|
| EVM0007695 | LG3 | hypothetical protein CICLE_v1 | not DE   | not DE   | not DE | not DE |
| EVM0014419 | LG3 | hypothetical protein CICLE_v1 | -1.30325 | 0.004145 | not DE | not DE |
| EVM0024015 | LG3 | hypothetical protein CICLE_v1 | not DE   | not DE   | not DE | not DE |
| EVM0012594 | LG3 | hypothetical protein CICLE_v1 | not DE   | not DE   | not DE | not DE |
| EVM0003271 | LG3 | hypothetical protein CICLE_v1 | not DE   | not DE   | not DE | not DE |
| EVM0009625 | LG3 | hypothetical protein CICLE_v1 | not DE   | not DE   | not DE | not DE |
| EVM0005374 | LG3 | hypothetical protein CICLE_v1 | 1.00825  | 0.038442 | not DE | not DE |
| EVM0005596 | LG3 | hypothetical protein CICLE_v1 | not DE   | not DE   | not DE | not DE |
| EVM0019939 | LG3 | hypothetical protein CICLE_v1 | not DE   | not DE   | not DE | not DE |
| EVM0000598 | LG3 | hypothetical protein CICLE_v1 | not DE   | not DE   | not DE | not DE |
| EVM0005079 | LG3 | hypothetical protein CICLE_v1 | not DE   | not DE   | not DE | not DE |
| EVM0010657 | LG3 | hypothetical protein CICLE_v1 | not DE   | not DE   | not DE | not DE |
| EVM0004251 | LG3 | hypothetical protein CICLE_v1 | not DE   | not DE   | not DE | not DE |
| EVM0012653 | LG3 | hypothetical protein CICLE_v1 | not DE   | not DE   | not DE | not DE |
| EVM0022616 | LG3 | hypothetical protein CICLE_v1 | not DE   | not DE   | not DE | not DE |
| EVM0002501 | LG3 | hypothetical protein CICLE_v1 | not DE   | not DE   | not DE | not DE |
| EVM0014625 | LG3 | hypothetical protein CICLE_v1 | not DE   | not DE   | not DE | not DE |
| EVM0012625 | LG3 | hypothetical protein CICLE_v1 | not DE   | not DE   | not DE | not DE |
| EVM0008459 | LG3 | hypothetical protein CICLE_v1 | not DE   | not DE   | not DE | not DE |
| EVM0024226 | LG3 | hypothetical protein CICLE_v1 | not DE   | not DE   | not DE | not DE |
| EVM0019944 | LG3 | hypothetical protein CICLE_v1 | not DE   | not DE   | not DE | not DE |
| EVM0005085 | LG3 | hypothetical protein CICLE_v1 | not DE   | not DE   | not DE | not DE |
| EVM0018138 | LG3 | hypothetical protein CICLE_v1 | not DE   | not DE   | not DE | not DE |
| EVM0018272 | LG3 | hypothetical protein CICLE_v1 | not DE   | not DE   | not DE | not DE |
| EVM0018360 | LG3 | hypothetical protein CICLE_v1 | not DE   | not DE   | not DE | not DE |
| EVM0020919 | LG3 | hypothetical protein CICLE_v1 | not DE   | not DE   | not DE | not DE |
| EVM0023661 | LG3 | hypothetical protein CICLE_v1 | not DE   | not DE   | not DE | not DE |
| EVM0000885 | LG3 | hypothetical protein CICLE_v1 | not DE   | not DE   | not DE | not DE |
| EVM0017275 | LG3 | hypothetical protein CICLE_v1 | not DE   | not DE   | not DE | not DE |
| EVM0012357 | LG3 | hypothetical protein CICLE_v1 | not DE   | not DE   | not DE | not DE |
| EVM0024208 | LG3 | hypothetical protein CICLE_v1 | not DE   | not DE   | not DE | not DE |
| EVM0019390 | LG3 | hypothetical protein CICLE_v1 | not DE   | not DE   | not DE | not DE |
| EVM0010890 | LG3 | hypothetical protein CICLE_v1 | not DE   | not DE   | not DE | not DE |
| EVM0024613 | LG3 | hypothetical protein CICLE_v1 | not DE   | not DE   | not DE | not DE |
| EVM0012971 | LG3 | hypothetical protein CICLE_v1 | not DE   | not DE   | not DE | not DE |
| EVM0015006 | LG3 | hypothetical protein CICLE_v1 | not DE   | not DE   | not DE | not DE |
| EVM0001558 | LG3 | hypothetical protein CICLE_v1 | not DE   | not DE   | not DE | not DE |
| EVM0003969 | LG3 | hypothetical protein CICLE_v1 | -2.45053 | 0.027451 | not DE | not DE |
| EVM0010500 | LG3 | hypothetical protein CICLE_v1 | -1.18982 | 0.023411 | not DE | not DE |
| EVM0009966 | LG3 | hypothetical protein CICLE_v1 | not DE   | not DE   | not DE | not DE |
| EVM0004918 | LG3 | hypothetical protein CICLE_v1 | not DE   | not DE   | not DE | not DE |
| EVM0013886 | LG3 | hypothetical protein CICLE_v1 | not DE   | not DE   | not DE | not DE |
| EVM0011165 | LG3 | hypothetical protein CICLE_v1 | not DE   | not DE   | not DE | not DE |
| EVM0022018 | LG3 | hypothetical protein CICLE_v1 | not DE   | not DE   | not DE | not DE |
| EVM0015842 | LG3 | hypothetical protein CICLE_v1 | not DE   | not DE   | not DE | not DE |
| EVM0020425 | LG3 | hypothetical protein CICLE_v1 | not DE   | not DE   | not DE | not DE |
| EVM0002623 | LG3 | hypothetical protein CICLE_v1 | not DE   | not DE   | not DE | not DE |
| EVM0018857 | LG3 | hypothetical protein CICLE_v1 | not DE   | not DE   | not DE | not DE |
| EVM0001148 | LG3 | hypothetical protein CICLE_v1 | not DE   | not DE   | not DE | not DE |
| EVM0015626 | LG3 | hypothetical protein CICLE_v1 | not DE   | not DE   | not DE | not DE |
| EVM0004515 | LG3 | hypothetical protein CICLE_v1 | not DE   | not DE   | not DE | not DE |
| EVM0013938 | LG3 | hypothetical protein CICLE_v1 | not DE   | not DE   | not DE | not DE |
| EVM0018063 | LG3 | hypothetical protein CICLE_v1 | 1.027151 | 0.044161 | not DE | not DE |
| EVM0022832 | LG3 | hypothetical protein CICLE_v1 | not DE   | not DE   | not DE | not DE |

|            |     |                               |          |          |          |         |
|------------|-----|-------------------------------|----------|----------|----------|---------|
| EVM0002635 | LG3 | hypothetical protein CICLE_v1 | not DE   | not DE   | not DE   | not DE  |
| EVM0009196 | LG3 | hypothetical protein CICLE_v1 | not DE   | not DE   | not DE   | not DE  |
| EVM0007235 | LG3 | hypothetical protein CICLE_v1 | not DE   | not DE   | not DE   | not DE  |
| EVM0003178 | LG3 | hypothetical protein CICLE_v1 | not DE   | not DE   | not DE   | not DE  |
| EVM0007152 | LG3 | hypothetical protein CICLE_v1 | not DE   | not DE   | not DE   | not DE  |
| EVM0012117 | LG3 | hypothetical protein CICLE_v1 | not DE   | not DE   | not DE   | not DE  |
| EVM0014868 | LG3 | hypothetical protein CICLE_v1 | not DE   | not DE   | not DE   | not DE  |
| EVM0000855 | LG3 | hypothetical protein CICLE_v1 | not DE   | not DE   | not DE   | not DE  |
| EVM0008201 | LG3 | hypothetical protein CICLE_v1 | not DE   | not DE   | not DE   | not DE  |
| EVM0015474 | LG3 | hypothetical protein CICLE_v1 | not DE   | not DE   | not DE   | not DE  |
| EVM0009836 | LG3 | hypothetical protein CICLE_v1 | not DE   | not DE   | not DE   | not DE  |
| EVM0012926 | LG3 | hypothetical protein CICLE_v1 | not DE   | not DE   | not DE   | not DE  |
| EVM0006668 | LG3 | hypothetical protein CICLE_v1 | not DE   | not DE   | not DE   | not DE  |
| EVM0007573 | LG3 | hypothetical protein CICLE_v1 | not DE   | not DE   | not DE   | not DE  |
| EVM0023351 | LG3 | hypothetical protein CICLE_v1 | not DE   | not DE   | not DE   | not DE  |
| EVM0022553 | LG3 | hypothetical protein CICLE_v1 | not DE   | not DE   | not DE   | not DE  |
| EVM0011766 | LG3 | hypothetical protein CICLE_v1 | not DE   | not DE   | not DE   | not DE  |
| EVM0023296 | LG3 | hypothetical protein CICLE_v1 | not DE   | not DE   | not DE   | not DE  |
| EVM0016311 | LG3 | hypothetical protein CICLE_v1 | not DE   | not DE   | not DE   | not DE  |
| EVM0011726 | LG3 | hypothetical protein CICLE_v1 | not DE   | not DE   | not DE   | not DE  |
| EVM0020832 | LG3 | hypothetical protein CICLE_v1 | not DE   | not DE   | not DE   | not DE  |
| EVM0014161 | LG3 | hypothetical protein CICLE_v1 | not DE   | not DE   | not DE   | not DE  |
| EVM0000494 | LG3 | hypothetical protein CICLE_v1 | not DE   | not DE   | not DE   | not DE  |
| EVM0016957 | LG3 | hypothetical protein CICLE_v1 | not DE   | not DE   | not DE   | not DE  |
| EVM0018780 | LG3 | hypothetical protein CICLE_v1 | not DE   | not DE   | not DE   | not DE  |
| EVM0002129 | LG3 | hypothetical protein CICLE_v1 | not DE   | not DE   | not DE   | not DE  |
| EVM0014209 | LG3 | hypothetical protein CICLE_v1 | not DE   | not DE   | not DE   | not DE  |
| EVM0002894 | LG3 | hypothetical protein CICLE_v1 | not DE   | not DE   | not DE   | not DE  |
| EVM0024104 | LG3 | hypothetical protein CICLE_v1 | not DE   | not DE   | not DE   | not DE  |
| EVM0001736 | LG3 | hypothetical protein CICLE_v1 | not DE   | not DE   | not DE   | not DE  |
| EVM0001578 | LG3 | hypothetical protein CICLE_v1 | -2.33161 | 0.004857 | -2.95502 | #####   |
| EVM0019806 | LG3 | hypothetical protein CICLE_v1 | not DE   | not DE   | -1.28878 | 0.01332 |
| EVM0008513 | LG3 | hypothetical protein CICLE_v1 | not DE   | not DE   | not DE   | not DE  |
| EVM0016968 | LG3 | hypothetical protein CICLE_v1 | not DE   | not DE   | not DE   | not DE  |
| EVM0013103 | LG3 | hypothetical protein CICLE_v1 | not DE   | not DE   | not DE   | not DE  |
| EVM0009132 | LG3 | hypothetical protein CICLE_v1 | not DE   | not DE   | not DE   | not DE  |
| EVM0019960 | LG3 | hypothetical protein CICLE_v1 | not DE   | not DE   | not DE   | not DE  |
| EVM0022648 | LG3 | hypothetical protein CICLE_v1 | not DE   | not DE   | not DE   | not DE  |
| EVM0012409 | LG3 | hypothetical protein CICLE_v1 | not DE   | not DE   | not DE   | not DE  |
| EVM0003191 | LG3 | hypothetical protein CICLE_v1 | not DE   | not DE   | not DE   | not DE  |
| EVM0024327 | LG3 | hypothetical protein CICLE_v1 | not DE   | not DE   | 2.183909 | 0.01727 |
| EVM0019333 | LG3 | hypothetical protein CICLE_v1 | not DE   | not DE   | not DE   | not DE  |
| EVM0019049 | LG3 | hypothetical protein CICLE_v1 | not DE   | not DE   | not DE   | not DE  |
| EVM0015819 | LG3 | hypothetical protein CICLE_v1 | not DE   | not DE   | 1.049497 | 0.0214  |
| EVM0001088 | LG3 | hypothetical protein CICLE_v1 | not DE   | not DE   | not DE   | not DE  |
| EVM0017603 | LG3 | hypothetical protein CICLE_v1 | not DE   | not DE   | not DE   | not DE  |
| EVM0006544 | LG3 | hypothetical protein CICLE_v1 | not DE   | not DE   | not DE   | not DE  |
| EVM0023525 | LG3 | hypothetical protein CICLE_v1 | not DE   | not DE   | not DE   | not DE  |
| EVM0023666 | LG3 | hypothetical protein CICLE_v1 | not DE   | not DE   | not DE   | not DE  |
| EVM0024662 | LG3 | hypothetical protein CICLE_v1 | not DE   | not DE   | not DE   | not DE  |
| EVM0004318 | LG3 | hypothetical protein CICLE_v1 | not DE   | not DE   | not DE   | not DE  |
| EVM0010496 | LG3 | hypothetical protein CICLE_v1 | not DE   | not DE   | not DE   | not DE  |
| EVM0016268 | LG3 | hypothetical protein CICLE_v1 | -4.47433 | 0.036286 | not DE   | not DE  |
| EVM0006992 | LG3 | hypothetical protein CICLE_v1 | not DE   | not DE   | not DE   | not DE  |

|            |     |                               |          |          |          |         |
|------------|-----|-------------------------------|----------|----------|----------|---------|
| EVM0008601 | LG3 | hypothetical protein CICLE_v1 | not DE   | not DE   | not DE   | not DE  |
| EVM0019491 | LG3 | hypothetical protein CICLE_v1 | not DE   | not DE   | not DE   | not DE  |
| EVM0003152 | LG3 | hypothetical protein CICLE_v1 | not DE   | not DE   | 1.637809 | #####   |
| EVM0015482 | LG3 | hypothetical protein CICLE_v1 | not DE   | not DE   | not DE   | not DE  |
| EVM0022038 | LG3 | hypothetical protein CICLE_v1 | not DE   | not DE   | not DE   | not DE  |
| EVM0001413 | LG3 | hypothetical protein CICLE_v1 | not DE   | not DE   | not DE   | not DE  |
| EVM0002953 | LG3 | hypothetical protein CICLE_v1 | not DE   | not DE   | not DE   | not DE  |
| EVM0010099 | LG3 | hypothetical protein CICLE_v1 | 1.836534 | 0.027073 | not DE   | not DE  |
| EVM0005390 | LG3 | hypothetical protein CICLE_v1 | not DE   | not DE   | not DE   | not DE  |
| EVM0001283 | LG3 | hypothetical protein CICLE_v1 | not DE   | not DE   | not DE   | not DE  |
| EVM0022756 | LG3 | hypothetical protein CICLE_v1 | not DE   | not DE   | not DE   | not DE  |
| EVM0015913 | LG3 | hypothetical protein CICLE_v1 | not DE   | not DE   | not DE   | not DE  |
| EVM0019963 | LG3 | hypothetical protein CICLE_v1 | not DE   | not DE   | not DE   | not DE  |
| EVM0000240 | LG3 | hypothetical protein CICLE_v1 | not DE   | not DE   | not DE   | not DE  |
| EVM0014333 | LG3 | hypothetical protein CICLE_v1 | not DE   | not DE   | 1.193696 | 0.00136 |
| EVM0008087 | LG3 | hypothetical protein CICLE_v1 | not DE   | not DE   | not DE   | not DE  |
| EVM0023515 | LG3 | hypothetical protein CICLE_v1 | not DE   | not DE   | not DE   | not DE  |
| EVM0023693 | LG3 | hypothetical protein CICLE_v1 | not DE   | not DE   | not DE   | not DE  |
| EVM0003336 | LG3 | hypothetical protein CICLE_v1 | not DE   | not DE   | not DE   | not DE  |
| EVM0009046 | LG3 | hypothetical protein CICLE_v1 | not DE   | not DE   | not DE   | not DE  |
| EVM0012645 | LG3 | hypothetical protein CICLE_v1 | not DE   | not DE   | not DE   | not DE  |
| EVM0001279 | LG3 | hypothetical protein CICLE_v1 | not DE   | not DE   | not DE   | not DE  |
| EVM0007103 | LG3 | hypothetical protein CICLE_v1 | not DE   | not DE   | not DE   | not DE  |
| EVM0006679 | LG3 | hypothetical protein CICLE_v1 | not DE   | not DE   | not DE   | not DE  |
| EVM0015443 | LG3 | hypothetical protein CICLE_v1 | not DE   | not DE   | not DE   | not DE  |
| EVM0022609 | LG3 | hypothetical protein CICLE_v1 | not DE   | not DE   | not DE   | not DE  |
| EVM0007139 | LG3 | hypothetical protein CICLE_v1 | not DE   | not DE   | not DE   | not DE  |
| EVM0007254 | LG3 | hypothetical protein CICLE_v1 | not DE   | not DE   | not DE   | not DE  |
| EVM0009827 | LG3 | hypothetical protein CICLE_v1 | not DE   | not DE   | 1.081883 | 0.00018 |
| EVM0020911 | LG3 | hypothetical protein CICLE_v1 | not DE   | not DE   | not DE   | not DE  |
| EVM0015189 | LG3 | hypothetical protein CICLE_v1 | 1.794512 | 0.007284 | not DE   | not DE  |
| EVM0020781 | LG3 | hypothetical protein CICLE_v1 | not DE   | not DE   | 1.945003 | #####   |
| EVM0009426 | LG3 | hypothetical protein CICLE_v1 | -4.84888 | 0.001843 | -5.93523 | #####   |
| EVM0024511 | LG3 | hypothetical protein CICLE_v1 | not DE   | not DE   | 1.892162 | #####   |
| EVM0013961 | LG3 | hypothetical protein CICLE_v1 | not DE   | not DE   | not DE   | not DE  |
| EVM0008303 | LG3 | hypothetical protein CICLE_v1 | not DE   | not DE   | not DE   | not DE  |
| EVM0006510 | LG3 | hypothetical protein CICLE_v1 | not DE   | not DE   | 2.741724 | #####   |
| EVM0004039 | LG3 | hypothetical protein CICLE_v1 | not DE   | not DE   | not DE   | not DE  |
| EVM0010074 | LG3 | hypothetical protein CICLE_v1 | not DE   | not DE   | not DE   | not DE  |
| EVM0016095 | LG3 | hypothetical protein CICLE_v1 | not DE   | not DE   | not DE   | not DE  |
| EVM0012407 | LG3 | hypothetical protein CICLE_v1 | not DE   | not DE   | not DE   | not DE  |
| EVM0018354 | LG3 | hypothetical protein CICLE_v1 | not DE   | not DE   | not DE   | not DE  |
| EVM0002334 | LG3 | hypothetical protein CICLE_v1 | not DE   | not DE   | not DE   | not DE  |
| EVM0018364 | LG3 | hypothetical protein CICLE_v1 | not DE   | not DE   | not DE   | not DE  |
| EVM0014692 | LG3 | hypothetical protein CICLE_v1 | not DE   | not DE   | not DE   | not DE  |
| EVM0016737 | LG3 | hypothetical protein CICLE_v1 | 2.060025 | 0.007952 | not DE   | not DE  |
| EVM0012694 | LG3 | hypothetical protein CICLE_v1 | not DE   | not DE   | not DE   | not DE  |
| EVM0008014 | LG3 | hypothetical protein CICLE_v1 | not DE   | not DE   | not DE   | not DE  |
| EVM0003861 | LG3 | hypothetical protein CICLE_v1 | not DE   | not DE   | not DE   | not DE  |
| EVM0009477 | LG3 | hypothetical protein CICLE_v1 | not DE   | not DE   | not DE   | not DE  |
| EVM0013879 | LG3 | hypothetical protein CICLE_v1 | not DE   | not DE   | not DE   | not DE  |
| EVM0006892 | LG3 | hypothetical protein CICLE_v1 | -1.13165 | 9.16E-05 | not DE   | not DE  |
| EVM0011907 | LG3 | hypothetical protein CICLE_v1 | not DE   | not DE   | not DE   | not DE  |
| EVM0016908 | LG3 | hypothetical protein CICLE_v1 | not DE   | not DE   | not DE   | not DE  |



|            |     |                               |          |          |          |         |
|------------|-----|-------------------------------|----------|----------|----------|---------|
| EVM0017282 | LG3 | hypothetical protein CICLE_v1 | not DE   | not DE   | not DE   | not DE  |
| EVM0016083 | LG3 | hypothetical protein CICLE_v1 | not DE   | not DE   | not DE   | not DE  |
| EVM0018918 | LG3 | hypothetical protein CICLE_v1 | not DE   | not DE   | not DE   | not DE  |
| EVM0008705 | LG3 | hypothetical protein CICLE_v1 | not DE   | not DE   | not DE   | not DE  |
| EVM0000580 | LG3 | hypothetical protein CICLE_v1 | not DE   | not DE   | not DE   | not DE  |
| EVM0002933 | LG3 | hypothetical protein CICLE_v1 | not DE   | not DE   | not DE   | not DE  |
| EVM0022542 | LG3 | hypothetical protein CICLE_v1 | not DE   | not DE   | not DE   | not DE  |
| EVM0008950 | LG3 | hypothetical protein CICLE_v1 | not DE   | not DE   | not DE   | not DE  |
| EVM0000243 | LG3 | hypothetical protein CICLE_v1 | not DE   | not DE   | not DE   | not DE  |
| EVM0002722 | LG3 | hypothetical protein CICLE_v1 | -1.91651 | 0.003274 | not DE   | not DE  |
| EVM0004401 | LG3 | hypothetical protein CICLE_v1 | not DE   | not DE   | not DE   | not DE  |
| EVM0005121 | LG3 | hypothetical protein CICLE_v1 | not DE   | not DE   | not DE   | not DE  |
| EVM0006731 | LG3 | hypothetical protein CICLE_v1 | 7.272351 | 2.70E-05 | not DE   | not DE  |
| EVM0000744 | LG3 | hypothetical protein CICLE_v1 | not DE   | not DE   | not DE   | not DE  |
| EVM0017943 | LG3 | hypothetical protein CICLE_v1 | not DE   | not DE   | not DE   | not DE  |
| EVM0000978 | LG3 | hypothetical protein CICLE_v1 | not DE   | not DE   | not DE   | not DE  |
| EVM0021411 | LG3 | hypothetical protein CICLE_v1 | not DE   | not DE   | not DE   | not DE  |
| EVM0019792 | LG3 | hypothetical protein CICLE_v1 | not DE   | not DE   | not DE   | not DE  |
| EVM0006210 | LG3 | hypothetical protein CICLE_v1 | not DE   | not DE   | not DE   | not DE  |
| EVM0006717 | LG3 | hypothetical protein CICLE_v1 | not DE   | not DE   | not DE   | not DE  |
| EVM0006830 | LG3 | hypothetical protein CICLE_v1 | not DE   | not DE   | not DE   | not DE  |
| EVM0012660 | LG3 | hypothetical protein CICLE_v1 | not DE   | not DE   | not DE   | not DE  |
| EVM0016347 | LG3 | hypothetical protein CICLE_v1 | not DE   | not DE   | not DE   | not DE  |
| EVM0010984 | LG3 | hypothetical protein CICLE_v1 | not DE   | not DE   | not DE   | not DE  |
| EVM0005912 | LG3 | hypothetical protein CICLE_v1 | -2.84799 | 0.001527 | not DE   | not DE  |
| EVM0013537 | LG3 | hypothetical protein CICLE_v1 | -2.79845 | 0.000531 | not DE   | not DE  |
| EVM0007385 | LG3 | hypothetical protein CICLE_v1 | not DE   | not DE   | not DE   | not DE  |
| EVM0013223 | LG3 | hypothetical protein CICLE_v1 | not DE   | not DE   | not DE   | not DE  |
| EVM0002965 | LG3 | hypothetical protein CICLE_v1 | not DE   | not DE   | not DE   | not DE  |
| EVM0024033 | LG3 | hypothetical protein CICLE_v1 | not DE   | not DE   | not DE   | not DE  |
| EVM0007751 | LG3 | hypothetical protein CICLE_v1 | not DE   | not DE   | not DE   | not DE  |
| EVM0013777 | LG3 | hypothetical protein CICLE_v1 | not DE   | not DE   | not DE   | not DE  |
| EVM0016302 | LG3 | hypothetical protein CICLE_v1 | not DE   | not DE   | -1.55963 | 0.04356 |
| EVM0007805 | LG3 | hypothetical protein CICLE_v1 | not DE   | not DE   | not DE   | not DE  |
| EVM0022585 | LG3 | hypothetical protein CICLE_v1 | not DE   | not DE   | not DE   | not DE  |
| EVM0014411 | LG3 | hypothetical protein CICLE_v1 | not DE   | not DE   | not DE   | not DE  |
| EVM0021588 | LG3 | hypothetical protein CICLE_v1 | not DE   | not DE   | not DE   | not DE  |
| EVM0020017 | LG3 | hypothetical protein CICLE_v1 | not DE   | not DE   | not DE   | not DE  |
| EVM0011306 | LG3 | hypothetical protein CICLE_v1 | not DE   | not DE   | not DE   | not DE  |
| EVM0011402 | LG3 | hypothetical protein CICLE_v1 | not DE   | not DE   | not DE   | not DE  |
| EVM0021072 | LG3 | hypothetical protein CICLE_v1 | not DE   | not DE   | not DE   | not DE  |
| EVM0000515 | LG3 | hypothetical protein CICLE_v1 | not DE   | not DE   | not DE   | not DE  |
| EVM0003405 | LG3 | hypothetical protein CICLE_v1 | not DE   | not DE   | not DE   | not DE  |
| EVM0000620 | LG3 | hypothetical protein CICLE_v1 | not DE   | not DE   | not DE   | not DE  |
| EVM0002340 | LG3 | hypothetical protein CICLE_v1 | not DE   | not DE   | not DE   | not DE  |
| EVM0009493 | LG3 | hypothetical protein CICLE_v1 | not DE   | not DE   | not DE   | not DE  |
| EVM0014869 | LG3 | hypothetical protein CICLE_v1 | not DE   | not DE   | not DE   | not DE  |
| EVM0013824 | LG3 | hypothetical protein CICLE_v1 | not DE   | not DE   | not DE   | not DE  |
| EVM0020612 | LG3 | hypothetical protein CICLE_v1 | not DE   | not DE   | not DE   | not DE  |
| EVM0012376 | LG3 | hypothetical protein CICLE_v1 | not DE   | not DE   | not DE   | not DE  |
| EVM0015110 | LG3 | hypothetical protein CICLE_v1 | not DE   | not DE   | not DE   | not DE  |
| EVM0024492 | LG3 | hypothetical protein CICLE_v1 | not DE   | not DE   | not DE   | not DE  |
| EVM0002938 | LG3 | hypothetical protein CICLE_v1 | not DE   | not DE   | not DE   | not DE  |
| EVM0001248 | LG3 | hypothetical protein CICLE_v1 | not DE   | not DE   | not DE   | not DE  |



|            |     |                               |          |        |          |        |
|------------|-----|-------------------------------|----------|--------|----------|--------|
| EVM0010810 | LG3 | hypothetical protein CICLE_v1 | not DE   | not DE | not DE   | not DE |
| EVM0012161 | LG3 | hypothetical protein CICLE_v1 | not DE   | not DE | not DE   | not DE |
| EVM0014956 | LG3 | hypothetical protein CICLE_v1 | not DE   | not DE | not DE   | not DE |
| EVM0016119 | LG3 | hypothetical protein CICLE_v1 | not DE   | not DE | not DE   | not DE |
| EVM0016644 | LG3 | hypothetical protein CICLE_v1 | not DE   | not DE | not DE   | not DE |
| EVM0018948 | LG3 | hypothetical protein CICLE_v1 | not DE   | not DE | not DE   | not DE |
| EVM0019188 | LG3 | hypothetical protein CICLE_v1 | not DE   | not DE | not DE   | not DE |
| EVM0024631 | LG3 | hypothetical protein CICLE_v1 | not DE   | not DE | not DE   | not DE |
| EVM0005992 | LG3 | hypothetical protein CICLE_v1 | not DE   | not DE | not DE   | not DE |
| EVM0003476 | LG3 | hypothetical protein CICLE_v1 | not DE   | not DE | not DE   | not DE |
| EVM0007647 | LG3 | hypothetical protein CICLE_v1 | not DE   | not DE | not DE   | not DE |
| EVM0013856 | LG3 | hypothetical protein CICLE_v1 | not DE   | not DE | not DE   | not DE |
| EVM0015160 | LG3 | hypothetical protein CICLE_v1 | not DE   | not DE | not DE   | not DE |
| EVM0018211 | LG3 | hypothetical protein CICLE_v1 | not DE   | not DE | not DE   | not DE |
| EVM0002821 | LG3 | hypothetical protein CICLE_v1 | not DE   | not DE | not DE   | not DE |
| EVM0013819 | LG3 | hypothetical protein CICLE_v1 | not DE   | not DE | not DE   | not DE |
| EVM0003618 | LG3 | hypothetical protein CICLE_v1 | not DE   | not DE | not DE   | not DE |
| EVM0023633 | LG3 | hypothetical protein CICLE_v1 | not DE   | not DE | not DE   | not DE |
| EVM0022178 | LG3 | hypothetical protein CICLE_v1 | not DE   | not DE | not DE   | not DE |
| EVM0005066 | LG3 | hypothetical protein CICLE_v1 | not DE   | not DE | not DE   | not DE |
| EVM0011552 | LG3 | hypothetical protein CICLE_v1 | not DE   | not DE | not DE   | not DE |
| EVM0009918 | LG3 | hypothetical protein CICLE_v1 | not DE   | not DE | not DE   | not DE |
| EVM0005879 | LG3 | hypothetical protein CISIN_1g | not DE   | not DE | -1.37463 | #####  |
| EVM0022175 | LG3 | hypothetical protein CISIN_1g | not DE   | not DE | not DE   | not DE |
| EVM0008172 | LG3 | hypothetical protein CISIN_1g | not DE   | not DE | not DE   | not DE |
| EVM0004975 | LG3 | hypothetical protein CISIN_1g | not DE   | not DE | not DE   | not DE |
| EVM0007823 | LG3 | hypothetical protein CISIN_1g | not DE   | not DE | not DE   | not DE |
| EVM0005050 | LG3 | hypothetical protein CISIN_1g | not DE   | not DE | not DE   | not DE |
| EVM0023739 | LG3 | hypothetical protein CISIN_1g | not DE   | not DE | not DE   | not DE |
| EVM0004257 | LG3 | hypothetical protein CISIN_1g | not DE   | not DE | not DE   | not DE |
| EVM0019204 | LG3 | hypothetical protein CISIN_1g | not DE   | not DE | not DE   | not DE |
| EVM0013829 | LG3 | hypothetical protein CISIN_1g | -1.71275 | 0.0074 | not DE   | not DE |
| EVM0005451 | LG3 | hypothetical protein CISIN_1g | not DE   | not DE | not DE   | not DE |
| EVM0007657 | LG3 | hypothetical protein CISIN_1g | not DE   | not DE | not DE   | not DE |
| EVM0016481 | LG3 | hypothetical protein CISIN_1g | not DE   | not DE | not DE   | not DE |
| EVM0008397 | LG3 | hypothetical protein CISIN_1g | not DE   | not DE | not DE   | not DE |
| EVM0003613 | LG3 | hypothetical protein CISIN_1g | not DE   | not DE | not DE   | not DE |
| EVM0010514 | LG3 | hypothetical protein CISIN_1g | not DE   | not DE | not DE   | not DE |
| EVM0015934 | LG3 | hypothetical protein CISIN_1g | not DE   | not DE | not DE   | not DE |
| EVM0021587 | LG3 | hypothetical protein CISIN_1g | not DE   | not DE | not DE   | not DE |
| EVM0004051 | LG3 | hypothetical protein CISIN_1g | not DE   | not DE | not DE   | not DE |
| EVM0019925 | LG3 | hypothetical protein CISIN_1g | not DE   | not DE | not DE   | not DE |
| EVM0007276 | LG3 | hypothetical protein CISIN_1g | not DE   | not DE | not DE   | not DE |
| EVM0004315 | LG3 | hypothetical protein CISIN_1g | not DE   | not DE | not DE   | not DE |
| EVM0011323 | LG3 | hypothetical protein CISIN_1g | not DE   | not DE | not DE   | not DE |
| EVM0023751 | LG3 | hypothetical protein CISIN_1g | not DE   | not DE | not DE   | not DE |
| EVM0015675 | LG3 | hypothetical protein CISIN_1g | not DE   | not DE | not DE   | not DE |
| EVM0014791 | LG3 | hypothetical protein CISIN_1g | not DE   | not DE | not DE   | not DE |
| EVM0007635 | LG3 | hypothetical protein CISIN_1g | not DE   | not DE | not DE   | not DE |
| EVM0016880 | LG3 | hypothetical protein CISIN_1g | not DE   | not DE | not DE   | not DE |
| EVM0011697 | LG3 | hypothetical protein CISIN_1g | not DE   | not DE | not DE   | not DE |
| EVM0018416 | LG3 | hypothetical protein CISIN_1g | not DE   | not DE | not DE   | not DE |
| EVM0004240 | LG3 | hypothetical protein CISIN_1g | not DE   | not DE | not DE   | not DE |
| EVM0005910 | LG3 | hypothetical protein CISIN_1g | not DE   | not DE | not DE   | not DE |

|            |     |                               |          |          |        |        |
|------------|-----|-------------------------------|----------|----------|--------|--------|
| EVM0009384 | LG3 | hypothetical protein CISIN_1g | not DE   | not DE   | not DE | not DE |
| EVM0015696 | LG3 | hypothetical protein CISIN_1g | not DE   | not DE   | not DE | not DE |
| EVM0020985 | LG3 | hypothetical protein CISIN_1g | not DE   | not DE   | not DE | not DE |
| EVM0015412 | LG3 | hypothetical protein CISIN_1g | not DE   | not DE   | not DE | not DE |
| EVM0018907 | LG3 | hypothetical protein CISIN_1g | not DE   | not DE   | not DE | not DE |
| EVM0012175 | LG3 | hypothetical protein CISIN_1g | not DE   | not DE   | not DE | not DE |
| EVM0022671 | LG3 | hypothetical protein CISIN_1g | not DE   | not DE   | not DE | not DE |
| EVM0004372 | LG3 | hypothetical protein CISIN_1g | 1.004067 | 0.021991 | not DE | not DE |
| EVM0017924 | LG3 | hypothetical protein CISIN_1g | not DE   | not DE   | not DE | not DE |
| EVM0013797 | LG3 | hypothetical protein CISIN_1g | 2.488538 | 0.008345 | not DE | not DE |
| EVM0017908 | LG3 | hypothetical protein CISIN_1g | not DE   | not DE   | not DE | not DE |
| EVM0014605 | LG3 | hypothetical protein CISIN_1g | not DE   | not DE   | not DE | not DE |
| EVM0017495 | LG3 | hypothetical protein CISIN_1g | not DE   | not DE   | not DE | not DE |
| EVM0021372 | LG3 | hypothetical protein CISIN_1g | not DE   | not DE   | not DE | not DE |
| EVM0024365 | LG3 | hypothetical protein CISIN_1g | not DE   | not DE   | not DE | not DE |
| EVM0024527 | LG3 | hypothetical protein CISIN_1g | not DE   | not DE   | not DE | not DE |
| EVM0020530 | LG3 | hypothetical protein CISIN_1g | -1.61382 | 0.000137 | not DE | not DE |
| EVM0023750 | LG3 | hypothetical protein CISIN_1g | not DE   | not DE   | not DE | not DE |
| EVM0019634 | LG3 | hypothetical protein CISIN_1g | not DE   | not DE   | not DE | not DE |
| EVM0012045 | LG3 | hypothetical protein CISIN_1g | not DE   | not DE   | not DE | not DE |
| EVM0017214 | LG3 | hypothetical protein CISIN_1g | not DE   | not DE   | not DE | not DE |
| EVM0000261 | LG3 | hypothetical protein CISIN_1g | not DE   | not DE   | not DE | not DE |
| EVM0019357 | LG3 | hypothetical protein CISIN_1g | 1.095192 | 0.046686 | not DE | not DE |
| EVM0006135 | LG3 | hypothetical protein CISIN_1g | not DE   | not DE   | not DE | not DE |
| EVM0021564 | LG3 | hypothetical protein CISIN_1g | not DE   | not DE   | not DE | not DE |
| EVM0006048 | LG3 | hypothetical protein CISIN_1g | not DE   | not DE   | not DE | not DE |
| EVM0008747 | LG3 | hypothetical protein CISIN_1g | not DE   | not DE   | not DE | not DE |
| EVM0008123 | LG3 | hypothetical protein CISIN_1g | not DE   | not DE   | not DE | not DE |
| EVM0009585 | LG3 | hypothetical protein CISIN_1g | not DE   | not DE   | not DE | not DE |
| EVM0011609 | LG3 | hypothetical protein CISIN_1g | not DE   | not DE   | not DE | not DE |
| EVM0006775 | LG3 | hypothetical protein CISIN_1g | not DE   | not DE   | not DE | not DE |
| EVM0012265 | LG3 | hypothetical protein CISIN_1g | not DE   | not DE   | not DE | not DE |
| EVM0012313 | LG3 | hypothetical protein CISIN_1g | not DE   | not DE   | not DE | not DE |
| EVM0014031 | LG3 | hypothetical protein CISIN_1g | 1.760157 | 0.00842  | not DE | not DE |
| EVM0020435 | LG3 | hypothetical protein CISIN_1g | not DE   | not DE   | not DE | not DE |
| EVM0000665 | LG3 | hypothetical protein CISIN_1g | not DE   | not DE   | not DE | not DE |
| EVM0015385 | LG3 | hypothetical protein CISIN_1g | not DE   | not DE   | not DE | not DE |
| EVM0008696 | LG3 | hypothetical protein CISIN_1g | not DE   | not DE   | not DE | not DE |
| EVM0019704 | LG3 | hypothetical protein CISIN_1g | not DE   | not DE   | not DE | not DE |
| EVM0016962 | LG3 | hypothetical protein CISIN_1g | not DE   | not DE   | not DE | not DE |
| EVM0001616 | LG3 | hypothetical protein CISIN_1g | not DE   | not DE   | not DE | not DE |
| EVM0011531 | LG3 | hypothetical protein CISIN_1g | not DE   | not DE   | not DE | not DE |
| EVM0007476 | LG3 | hypothetical protein CISIN_1g | not DE   | not DE   | not DE | not DE |
| EVM0011273 | LG3 | hypothetical protein CISIN_1g | not DE   | not DE   | not DE | not DE |
| EVM0005691 | LG3 | hypothetical protein CISIN_1g | not DE   | not DE   | not DE | not DE |
| EVM0009822 | LG3 | hypothetical protein CISIN_1g | not DE   | not DE   | not DE | not DE |
| EVM0006184 | LG3 | hypothetical protein CISIN_1g | not DE   | not DE   | not DE | not DE |
| EVM0006656 | LG3 | hypothetical protein CISIN_1g | not DE   | not DE   | not DE | not DE |
| EVM0024567 | LG3 | hypothetical protein CISIN_1g | not DE   | not DE   | not DE | not DE |
| EVM0014410 | LG3 | hypothetical protein CISIN_1g | -1.00292 | 0.027418 | not DE | not DE |
| EVM0006741 | LG3 | hypothetical protein CISIN_1g | not DE   | not DE   | not DE | not DE |
| EVM0011088 | LG3 | hypothetical protein CISIN_1g | not DE   | not DE   | not DE | not DE |
| EVM0019013 | LG3 | hypothetical protein CISIN_1g | not DE   | not DE   | not DE | not DE |
| EVM0019544 | LG3 | hypothetical protein CISIN_1g | not DE   | not DE   | not DE | not DE |

|            |     |                               |          |          |          |         |
|------------|-----|-------------------------------|----------|----------|----------|---------|
| EVM0004983 | LG3 | hypothetical protein CISIN_1g | not DE   | not DE   | not DE   | not DE  |
| EVM0002082 | LG3 | hypothetical protein CISIN_1g | not DE   | not DE   | not DE   | not DE  |
| EVM0012711 | LG3 | hypothetical protein CISIN_1g | not DE   | not DE   | not DE   | not DE  |
| EVM0017302 | LG3 | hypothetical protein CISIN_1g | not DE   | not DE   | not DE   | not DE  |
| EVM0016203 | LG3 | hypothetical protein CISIN_1g | not DE   | not DE   | not DE   | not DE  |
| EVM0002690 | LG3 | hypothetical protein CISIN_1g | not DE   | not DE   | not DE   | not DE  |
| EVM0010264 | LG3 | hypothetical protein CISIN_1g | not DE   | not DE   | not DE   | not DE  |
| EVM0009506 | LG3 | hypothetical protein CISIN_1g | not DE   | not DE   | not DE   | not DE  |
| EVM0012731 | LG3 | hypothetical protein CISIN_1g | not DE   | not DE   | not DE   | not DE  |
| EVM0014391 | LG3 | hypothetical protein CISIN_1g | not DE   | not DE   | not DE   | not DE  |
| EVM0003321 | LG3 | hypothetical protein CISIN_1g | not DE   | not DE   | not DE   | not DE  |
| EVM0013160 | LG3 | hypothetical protein CISIN_1g | not DE   | not DE   | not DE   | not DE  |
| EVM0017388 | LG3 | hypothetical protein CISIN_1g | 1.017607 | 0.016898 | not DE   | not DE  |
| EVM0013650 | LG3 | hypothetical protein CISIN_1g | not DE   | not DE   | not DE   | not DE  |
| EVM0008757 | LG3 | hypothetical protein CISIN_1g | not DE   | not DE   | not DE   | not DE  |
| EVM0001296 | LG3 | hypothetical protein CISIN_1g | not DE   | not DE   | not DE   | not DE  |
| EVM0012802 | LG3 | hypothetical protein CISIN_1g | not DE   | not DE   | not DE   | not DE  |
| EVM0005019 | LG3 | hypothetical protein CISIN_1g | 1.705763 | 0.006282 | 1.297835 | 0.04718 |
| EVM0003514 | LG3 | hypothetical protein CISIN_1g | not DE   | not DE   | not DE   | not DE  |
| EVM0000318 | LG3 | hypothetical protein CISIN_1g | not DE   | not DE   | not DE   | not DE  |
| EVM0020189 | LG3 | hypothetical protein CISIN_1g | not DE   | not DE   | not DE   | not DE  |
| EVM0008230 | LG3 | hypothetical protein CISIN_1g | not DE   | not DE   | not DE   | not DE  |
| EVM0002429 | LG3 | hypothetical protein CISIN_1g | not DE   | not DE   | not DE   | not DE  |
| EVM0007269 | LG3 | hypothetical protein CISIN_1g | not DE   | not DE   | not DE   | not DE  |
| EVM0013382 | LG3 | hypothetical protein CISIN_1g | not DE   | not DE   | not DE   | not DE  |
| EVM0021608 | LG3 | hypothetical protein CISIN_1g | not DE   | not DE   | not DE   | not DE  |
| EVM0021988 | LG3 | hypothetical protein CISIN_1g | not DE   | not DE   | not DE   | not DE  |
| EVM0019579 | LG3 | hypothetical protein CISIN_1g | not DE   | not DE   | not DE   | not DE  |
| EVM0011891 | LG3 | hypothetical protein CISIN_1g | not DE   | not DE   | not DE   | not DE  |
| EVM0008387 | LG3 | hypothetical protein CISIN_1g | not DE   | not DE   | not DE   | not DE  |
| EVM0011136 | LG3 | hypothetical protein CISIN_1g | not DE   | not DE   | not DE   | not DE  |
| EVM0024634 | LG3 | hypothetical protein CISIN_1g | not DE   | not DE   | not DE   | not DE  |
| EVM0020263 | LG3 | hypothetical protein CISIN_1g | not DE   | not DE   | not DE   | not DE  |
| EVM0001767 | LG3 | hypothetical protein CISIN_1g | not DE   | not DE   | not DE   | not DE  |
| EVM0013380 | LG3 | hypothetical protein CISIN_1g | not DE   | not DE   | not DE   | not DE  |
| EVM0007144 | LG3 | hypothetical protein CISIN_1g | not DE   | not DE   | not DE   | not DE  |
| EVM0001984 | LG3 | hypothetical protein CISIN_1g | not DE   | not DE   | 1.132166 | 0.03482 |
| EVM0008335 | LG3 | hypothetical protein CISIN_1g | not DE   | not DE   | not DE   | not DE  |
| EVM0002678 | LG3 | hypothetical protein CISIN_1g | not DE   | not DE   | not DE   | not DE  |
| EVM0016216 | LG3 | hypothetical protein CISIN_1g | not DE   | not DE   | not DE   | not DE  |
| EVM0006230 | LG3 | hypothetical protein CISIN_1g | not DE   | not DE   | not DE   | not DE  |
| EVM0010204 | LG3 | hypothetical protein CISIN_1g | not DE   | not DE   | not DE   | not DE  |
| EVM0016885 | LG3 | hypothetical protein CISIN_1g | not DE   | not DE   | not DE   | not DE  |
| EVM0024126 | LG3 | hypothetical protein CISIN_1g | not DE   | not DE   | not DE   | not DE  |
| EVM0015222 | LG3 | hypothetical protein CISIN_1g | not DE   | not DE   | not DE   | not DE  |
| EVM0013242 | LG3 | hypothetical protein CISIN_1g | not DE   | not DE   | not DE   | not DE  |
| EVM0014389 | LG3 | hypothetical protein CISIN_1g | not DE   | not DE   | not DE   | not DE  |
| EVM0018861 | LG3 | hypothetical protein CISIN_1g | not DE   | not DE   | not DE   | not DE  |
| EVM0012805 | LG3 | hypothetical protein CISIN_1g | not DE   | not DE   | not DE   | not DE  |
| EVM0020113 | LG3 | hypothetical protein CISIN_1g | not DE   | not DE   | not DE   | not DE  |
| EVM0003158 | LG3 | hypothetical protein CISIN_1g | not DE   | not DE   | not DE   | not DE  |
| EVM0016168 | LG3 | hypothetical protein CISIN_1g | not DE   | not DE   | not DE   | not DE  |
| EVM0014015 | LG3 | hypothetical protein CISIN_1g | not DE   | not DE   | not DE   | not DE  |
| EVM0015214 | LG3 | hypothetical protein CISIN_1g | not DE   | not DE   | not DE   | not DE  |

|            |     |                               |          |          |          |         |
|------------|-----|-------------------------------|----------|----------|----------|---------|
| EVM0006938 | LG3 | hypothetical protein CISIN_1g | not DE   | not DE   | not DE   | not DE  |
| EVM0004145 | LG3 | hypothetical protein CISIN_1g | not DE   | not DE   | not DE   | not DE  |
| EVM0013747 | LG3 | hypothetical protein CISIN_1g | not DE   | not DE   | not DE   | not DE  |
| EVM0020647 | LG3 | hypothetical protein CISIN_1g | -2.33119 | 0.030031 | not DE   | not DE  |
| EVM0002957 | LG3 | hypothetical protein CISIN_1g | not DE   | not DE   | not DE   | not DE  |
| EVM0012019 | LG3 | hypothetical protein CISIN_1g | not DE   | not DE   | not DE   | not DE  |
| EVM0003902 | LG3 | hypothetical protein CISIN_1g | not DE   | not DE   | not DE   | not DE  |
| EVM0012298 | LG3 | hypothetical protein CISIN_1g | not DE   | not DE   | not DE   | not DE  |
| EVM0013268 | LG3 | hypothetical protein CISIN_1g | not DE   | not DE   | not DE   | not DE  |
| EVM0010676 | LG3 | hypothetical protein CISIN_1g | not DE   | not DE   | not DE   | not DE  |
| EVM0000984 | LG3 | hypothetical protein CISIN_1g | not DE   | not DE   | not DE   | not DE  |
| EVM0008890 | LG3 | hypothetical protein CISIN_1g | not DE   | not DE   | not DE   | not DE  |
| EVM0010078 | LG3 | hypothetical protein CISIN_1g | not DE   | not DE   | not DE   | not DE  |
| EVM0000961 | LG3 | hypothetical protein CISIN_1g | not DE   | not DE   | not DE   | not DE  |
| EVM0000377 | LG3 | hypothetical protein CISIN_1g | not DE   | not DE   | 2.024116 | #####   |
| EVM0016414 | LG3 | hypothetical protein CISIN_1g | not DE   | not DE   | not DE   | not DE  |
| EVM0008308 | LG3 | hypothetical protein CISIN_1g | not DE   | not DE   | not DE   | not DE  |
| EVM0010572 | LG3 | hypothetical protein CISIN_1g | not DE   | not DE   | not DE   | not DE  |
| EVM0018608 | LG3 | hypothetical protein CISIN_1g | not DE   | not DE   | not DE   | not DE  |
| EVM0004212 | LG3 | hypothetical protein CISIN_1g | 3.360102 | 0.000147 | not DE   | not DE  |
| EVM0004637 | LG3 | hypothetical protein CISIN_1g | not DE   | not DE   | not DE   | not DE  |
| EVM0014584 | LG3 | hypothetical protein CISIN_1g | not DE   | not DE   | not DE   | not DE  |
| EVM0006297 | LG3 | hypothetical protein CISIN_1g | not DE   | not DE   | not DE   | not DE  |
| EVM0015613 | LG3 | hypothetical protein CISIN_1g | not DE   | not DE   | not DE   | not DE  |
| EVM0023630 | LG3 | hypothetical protein CISIN_1g | not DE   | not DE   | not DE   | not DE  |
| EVM0001964 | LG3 | hypothetical protein CISIN_1g | not DE   | not DE   | not DE   | not DE  |
| EVM0019957 | LG3 | hypothetical protein CISIN_1g | not DE   | not DE   | not DE   | not DE  |
| EVM0022956 | LG3 | hypothetical protein CISIN_1g | not DE   | not DE   | not DE   | not DE  |
| EVM0003215 | LG3 | hypothetical protein CISIN_1g | not DE   | not DE   | not DE   | not DE  |
| EVM0011887 | LG3 | hypothetical protein CISIN_1g | not DE   | not DE   | not DE   | not DE  |
| EVM0000809 | LG3 | hypothetical protein CISIN_1g | not DE   | not DE   | not DE   | not DE  |
| EVM0005643 | LG3 | hypothetical protein CISIN_1g | not DE   | not DE   | not DE   | not DE  |
| EVM0015280 | LG3 | hypothetical protein CISIN_1g | not DE   | not DE   | not DE   | not DE  |
| EVM0021874 | LG3 | hypothetical protein CISIN_1g | not DE   | not DE   | 2.473551 | 0.04159 |
| EVM0000857 | LG3 | hypothetical protein CISIN_1g | not DE   | not DE   | not DE   | not DE  |
| EVM0009720 | LG3 | hypothetical protein CISIN_1g | not DE   | not DE   | not DE   | not DE  |
| EVM0016201 | LG3 | hypothetical protein CISIN_1g | not DE   | not DE   | not DE   | not DE  |
| EVM0010765 | LG3 | hypothetical protein CISIN_1g | not DE   | not DE   | not DE   | not DE  |
| EVM0022363 | LG3 | hypothetical protein CISIN_1g | not DE   | not DE   | not DE   | not DE  |
| EVM0016041 | LG3 | hypothetical protein CISIN_1g | not DE   | not DE   | not DE   | not DE  |
| EVM0005857 | LG3 | hypothetical protein CISIN_1g | not DE   | not DE   | not DE   | not DE  |
| EVM0008536 | LG3 | hypothetical protein CISIN_1g | not DE   | not DE   | not DE   | not DE  |
| EVM0012068 | LG3 | hypothetical protein CISIN_1g | not DE   | not DE   | not DE   | not DE  |
| EVM0014077 | LG3 | hypothetical protein CISIN_1g | not DE   | not DE   | not DE   | not DE  |
| EVM0008095 | LG3 | hypothetical protein CISIN_1g | not DE   | not DE   | not DE   | not DE  |
| EVM0010394 | LG3 | hypothetical protein CISIN_1g | not DE   | not DE   | not DE   | not DE  |
| EVM0013552 | LG3 | hypothetical protein CISIN_1g | not DE   | not DE   | not DE   | not DE  |
| EVM0001694 | LG3 | hypothetical protein CISIN_1g | not DE   | not DE   | not DE   | not DE  |
| EVM0010129 | LG3 | hypothetical protein CISIN_1g | not DE   | not DE   | not DE   | not DE  |
| EVM0018518 | LG3 | hypothetical protein CISIN_1g | not DE   | not DE   | not DE   | not DE  |
| EVM0001673 | LG3 | hypothetical protein CISIN_1g | not DE   | not DE   | not DE   | not DE  |
| EVM0020353 | LG3 | hypothetical protein CISIN_1g | not DE   | not DE   | not DE   | not DE  |
| EVM0024096 | LG3 | hypothetical protein CISIN_1g | not DE   | not DE   | not DE   | not DE  |
| EVM0007496 | LG3 | hypothetical protein CISIN_1g | not DE   | not DE   | not DE   | not DE  |

|            |     |                                       |          |          |          |         |
|------------|-----|---------------------------------------|----------|----------|----------|---------|
| EVM0009268 | LG3 | hypothetical protein CISIN_1g         | not DE   | not DE   | not DE   | not DE  |
| EVM0013428 | LG3 | hypothetical protein CISIN_1g         | not DE   | not DE   | not DE   | not DE  |
| EVM0022541 | LG3 | hypothetical protein CISIN_1g         | not DE   | not DE   | not DE   | not DE  |
| EVM0009068 | LG3 | hypothetical protein CISIN_1g         | not DE   | not DE   | not DE   | not DE  |
| EVM0008177 | LG3 | hypothetical protein CISIN_1g         | not DE   | not DE   | not DE   | not DE  |
| EVM0024076 | LG3 | hypothetical protein CISIN_1g         | not DE   | not DE   | not DE   | not DE  |
| EVM0019956 | LG3 | hypothetical protein CISIN_1g         | not DE   | not DE   | not DE   | not DE  |
| EVM0007424 | LG3 | hypothetical protein CISIN_1g         | not DE   | not DE   | not DE   | not DE  |
| EVM0012059 | LG3 | hypothetical protein CISIN_1g         | not DE   | not DE   | not DE   | not DE  |
| EVM0008500 | LG3 | hypothetical protein CISIN_1g         | not DE   | not DE   | not DE   | not DE  |
| EVM0001712 | LG3 | hypothetical protein CISIN_1g         | not DE   | not DE   | not DE   | not DE  |
| EVM0019025 | LG3 | hypothetical protein CISIN_1g         | not DE   | not DE   | not DE   | not DE  |
| EVM0006263 | LG3 | hypothetical protein CISIN_1g         | not DE   | not DE   | not DE   | not DE  |
| EVM0001243 | LG3 | hypothetical protein CISIN_1g         | not DE   | not DE   | not DE   | not DE  |
| EVM0002561 | LG3 | hypothetical protein CISIN_1g         | not DE   | not DE   | not DE   | not DE  |
| EVM0013330 | LG3 | hypothetical protein CISIN_1g         | not DE   | not DE   | not DE   | not DE  |
| EVM0003036 | LG3 | hypothetical protein CISIN_1g         | not DE   | not DE   | not DE   | not DE  |
| EVM0013372 | LG3 | hypothetical protein CISIN_1g         | not DE   | not DE   | not DE   | not DE  |
| EVM0022722 | LG3 | hypothetical protein CISIN_1g         | not DE   | not DE   | not DE   | not DE  |
| EVM0010441 | LG3 | hypothetical protein Csa_3G14         | not DE   | not DE   | not DE   | not DE  |
| EVM0011884 | LG3 | hypothetical protein Csa_6G51         | not DE   | not DE   | not DE   | not DE  |
| EVM0013315 | LG3 | hypothetical protein EUGRSUZ_         | not DE   | not DE   | not DE   | not DE  |
| EVM0013652 | LG3 | hypothetical protein EUGRSUZ_         | not DE   | not DE   | not DE   | not DE  |
| EVM0017917 | LG3 | hypothetical protein EUGRSUZ_         | not DE   | not DE   | not DE   | not DE  |
| EVM0021747 | LG3 | hypothetical protein EUGRSUZ_         | not DE   | not DE   | not DE   | not DE  |
| EVM0018108 | LG3 | hypothetical protein EUGRSUZ_         | not DE   | not DE   | not DE   | not DE  |
| EVM0020601 | LG3 | hypothetical protein EUGRSUZ_         | not DE   | not DE   | not DE   | not DE  |
| EVM0024433 | LG3 | hypothetical protein EUGRSUZ_5.419074 | 5.38E-05 | not DE   | not DE   | not DE  |
| EVM0024551 | LG3 | hypothetical protein EUTSA_v1         | not DE   | not DE   | not DE   | not DE  |
| EVM0012432 | LG3 | hypothetical protein EUTSA_v1         | not DE   | not DE   | not DE   | not DE  |
| EVM0022547 | LG3 | hypothetical protein EUTSA_v1         | -1.94427 | 4.14E-06 | -1.72648 | 0.00573 |
| EVM0017775 | LG3 | hypothetical protein F383_339         | not DE   | not DE   | not DE   | not DE  |
| EVM0014149 | LG3 | hypothetical protein JCGZ_011         | not DE   | not DE   | not DE   | not DE  |
| EVM0013535 | LG3 | hypothetical protein JCGZ_020         | not DE   | not DE   | not DE   | not DE  |
| EVM0024168 | LG3 | hypothetical protein JCGZ_020         | not DE   | not DE   | not DE   | not DE  |
| EVM0007003 | LG3 | hypothetical protein JCGZ_020         | not DE   | not DE   | not DE   | not DE  |
| EVM0002832 | LG3 | hypothetical protein JCGZ_020         | not DE   | not DE   | not DE   | not DE  |
| EVM0005762 | LG3 | hypothetical protein JCGZ_021         | not DE   | not DE   | -2.90294 | 0.01996 |
| EVM0008064 | LG3 | hypothetical protein JCGZ_021         | not DE   | not DE   | not DE   | not DE  |
| EVM0010516 | LG3 | hypothetical protein JCGZ_021         | not DE   | not DE   | not DE   | not DE  |
| EVM0010503 | LG3 | hypothetical protein JCGZ_021         | not DE   | not DE   | not DE   | not DE  |
| EVM0007339 | LG3 | hypothetical protein JCGZ_021         | not DE   | not DE   | not DE   | not DE  |
| EVM0007824 | LG3 | hypothetical protein JCGZ_023         | not DE   | not DE   | not DE   | not DE  |
| EVM0017764 | LG3 | hypothetical protein JCGZ_023         | not DE   | not DE   | not DE   | not DE  |
| EVM0005209 | LG3 | hypothetical protein JCGZ_023         | not DE   | not DE   | not DE   | not DE  |
| EVM0015163 | LG3 | hypothetical protein JCGZ_023         | not DE   | not DE   | not DE   | not DE  |
| EVM0013588 | LG3 | hypothetical protein JCGZ_023         | not DE   | not DE   | not DE   | not DE  |
| EVM0020877 | LG3 | hypothetical protein JCGZ_060         | not DE   | not DE   | not DE   | not DE  |
| EVM0000225 | LG3 | hypothetical protein JCGZ_064         | not DE   | not DE   | not DE   | not DE  |
| EVM0023547 | LG3 | hypothetical protein JCGZ_069         | not DE   | not DE   | not DE   | not DE  |
| EVM0013635 | LG3 | hypothetical protein JCGZ_070         | not DE   | not DE   | not DE   | not DE  |
| EVM0000800 | LG3 | hypothetical protein JCGZ_070         | not DE   | not DE   | not DE   | not DE  |
| EVM0023292 | LG3 | hypothetical protein JCGZ_070         | not DE   | not DE   | not DE   | not DE  |
| EVM0008785 | LG3 | hypothetical protein JCGZ_070         | not DE   | not DE   | not DE   | not DE  |

|            |     |                               |          |          |          |         |
|------------|-----|-------------------------------|----------|----------|----------|---------|
| EVM0019286 | LG3 | hypothetical protein JCGZ_071 | not DE   | not DE   | -1.09199 | 0.00077 |
| EVM0012252 | LG3 | hypothetical protein JCGZ_071 | -1.41574 | 0.009728 | not DE   | not DE  |
| EVM0019056 | LG3 | hypothetical protein JCGZ_071 | not DE   | not DE   | not DE   | not DE  |
| EVM0017312 | LG3 | hypothetical protein JCGZ_075 | -1.80591 | 3.58E-09 | not DE   | not DE  |
| EVM0016138 | LG3 | hypothetical protein JCGZ_075 | not DE   | not DE   | not DE   | not DE  |
| EVM0022209 | LG3 | hypothetical protein JCGZ_076 | not DE   | not DE   | not DE   | not DE  |
| EVM0024289 | LG3 | hypothetical protein JCGZ_076 | not DE   | not DE   | not DE   | not DE  |
| EVM0009538 | LG3 | hypothetical protein JCGZ_076 | not DE   | not DE   | not DE   | not DE  |
| EVM0016595 | LG3 | hypothetical protein JCGZ_076 | not DE   | not DE   | not DE   | not DE  |
| EVM0020750 | LG3 | hypothetical protein JCGZ_076 | not DE   | not DE   | 1.020682 | 0.00177 |
| EVM0015255 | LG3 | hypothetical protein JCGZ_076 | not DE   | not DE   | not DE   | not DE  |
| EVM0005405 | LG3 | hypothetical protein JCGZ_077 | not DE   | not DE   | -1.98312 | 0.00107 |
| EVM0003397 | LG3 | hypothetical protein JCGZ_077 | not DE   | not DE   | not DE   | not DE  |
| EVM0010424 | LG3 | hypothetical protein JCGZ_103 | not DE   | not DE   | not DE   | not DE  |
| EVM0005915 | LG3 | hypothetical protein JCGZ_106 | not DE   | not DE   | not DE   | not DE  |
| EVM0007845 | LG3 | hypothetical protein JCGZ_106 | not DE   | not DE   | not DE   | not DE  |
| EVM0009051 | LG3 | hypothetical protein JCGZ_106 | not DE   | not DE   | not DE   | not DE  |
| EVM0000463 | LG3 | hypothetical protein JCGZ_108 | not DE   | not DE   | not DE   | not DE  |
| EVM0001640 | LG3 | hypothetical protein JCGZ_131 | -4.60955 | 3.84E-15 | -3.98423 | #####   |
| EVM0015616 | LG3 | hypothetical protein JCGZ_189 | not DE   | not DE   | not DE   | not DE  |
| EVM0011211 | LG3 | hypothetical protein JCGZ_189 | not DE   | not DE   | not DE   | not DE  |
| EVM0007780 | LG3 | hypothetical protein JCGZ_190 | not DE   | not DE   | not DE   | not DE  |
| EVM0016402 | LG3 | hypothetical protein JCGZ_190 | not DE   | not DE   | not DE   | not DE  |
| EVM0007890 | LG3 | hypothetical protein JCGZ_190 | not DE   | not DE   | not DE   | not DE  |
| EVM0016642 | LG3 | hypothetical protein JCGZ_190 | not DE   | not DE   | not DE   | not DE  |
| EVM0000025 | LG3 | hypothetical protein JCGZ_190 | not DE   | not DE   | not DE   | not DE  |
| EVM0003503 | LG3 | hypothetical protein JCGZ_208 | not DE   | not DE   | not DE   | not DE  |
| EVM0012269 | LG3 | hypothetical protein JCGZ_209 | not DE   | not DE   | not DE   | not DE  |
| EVM0021461 | LG3 | hypothetical protein JCGZ_218 | not DE   | not DE   | not DE   | not DE  |
| EVM0018752 | LG3 | hypothetical protein JCGZ_231 | not DE   | not DE   | not DE   | not DE  |
| EVM0018270 | LG3 | hypothetical protein JCGZ_232 | not DE   | not DE   | not DE   | not DE  |
| EVM0009733 | LG3 | hypothetical protein JCGZ_232 | not DE   | not DE   | not DE   | not DE  |
| EVM0009079 | LG3 | hypothetical protein JCGZ_233 | not DE   | not DE   | not DE   | not DE  |
| EVM0004916 | LG3 | hypothetical protein JCGZ_237 | not DE   | not DE   | not DE   | not DE  |
| EVM0006975 | LG3 | hypothetical protein JCGZ_238 | not DE   | not DE   | not DE   | not DE  |
| EVM0001359 | LG3 | hypothetical protein L484_000 | not DE   | not DE   | not DE   | not DE  |
| EVM0015389 | LG3 | hypothetical protein L484_004 | not DE   | not DE   | 3.544359 | 0.01731 |
| EVM0018225 | LG3 | hypothetical protein L484_005 | not DE   | not DE   | not DE   | not DE  |
| EVM0017827 | LG3 | hypothetical protein L484_007 | not DE   | not DE   | not DE   | not DE  |
| EVM0011781 | LG3 | hypothetical protein L484_007 | not DE   | not DE   | not DE   | not DE  |
| EVM0001102 | LG3 | hypothetical protein L484_008 | not DE   | not DE   | 1.514924 | 0.03193 |
| EVM0006897 | LG3 | hypothetical protein L484_008 | not DE   | not DE   | not DE   | not DE  |
| EVM0006910 | LG3 | hypothetical protein L484_010 | not DE   | not DE   | not DE   | not DE  |
| EVM0003947 | LG3 | hypothetical protein L484_011 | not DE   | not DE   | not DE   | not DE  |
| EVM0008987 | LG3 | hypothetical protein L484_017 | not DE   | not DE   | not DE   | not DE  |
| EVM0015789 | LG3 | hypothetical protein L484_021 | not DE   | not DE   | not DE   | not DE  |
| EVM0000475 | LG3 | hypothetical protein L484_023 | not DE   | not DE   | not DE   | not DE  |
| EVM0008541 | LG3 | hypothetical protein L484_025 | not DE   | not DE   | not DE   | not DE  |
| EVM0016049 | LG3 | hypothetical protein MIMGU_mg | not DE   | not DE   | not DE   | not DE  |
| EVM0023076 | LG3 | hypothetical protein MIMGU_mg | not DE   | not DE   | not DE   | not DE  |
| EVM0005305 | LG3 | hypothetical protein MIMGU_mg | not DE   | not DE   | not DE   | not DE  |
| EVM0016128 | LG3 | hypothetical protein OsI_1490 | not DE   | not DE   | not DE   | not DE  |
| EVM0014127 | LG3 | hypothetical protein PHAVU_00 | not DE   | not DE   | not DE   | not DE  |
| EVM0015568 | LG3 | hypothetical protein PHAVU_00 | not DE   | not DE   | not DE   | not DE  |



|            |     |                               |          |          |          |         |
|------------|-----|-------------------------------|----------|----------|----------|---------|
| EVM0017432 | LG3 | hypothetical protein PHAVU_00 | not DE   | not DE   | not DE   | not DE  |
| EVM0012448 | LG3 | hypothetical protein POPTR_00 | not DE   | not DE   | not DE   | not DE  |
| EVM0021237 | LG3 | hypothetical protein POPTR_00 | not DE   | not DE   | not DE   | not DE  |
| EVM0008088 | LG3 | hypothetical protein POPTR_00 | not DE   | not DE   | not DE   | not DE  |
| EVM0013324 | LG3 | hypothetical protein POPTR_00 | not DE   | not DE   | not DE   | not DE  |
| EVM0003197 | LG3 | hypothetical protein POPTR_00 | not DE   | not DE   | not DE   | not DE  |
| EVM0022231 | LG3 | hypothetical protein POPTR_00 | not DE   | not DE   | not DE   | not DE  |
| EVM0014342 | LG3 | hypothetical protein POPTR_00 | not DE   | not DE   | not DE   | not DE  |
| EVM0023285 | LG3 | hypothetical protein POPTR_00 | not DE   | not DE   | not DE   | not DE  |
| EVM0009025 | LG3 | hypothetical protein POPTR_00 | not DE   | not DE   | not DE   | not DE  |
| EVM0009313 | LG3 | hypothetical protein POPTR_00 | not DE   | not DE   | not DE   | not DE  |
| EVM0010573 | LG3 | hypothetical protein POPTR_00 | not DE   | not DE   | not DE   | not DE  |
| EVM0022251 | LG3 | hypothetical protein POPTR_00 | not DE   | not DE   | not DE   | not DE  |
| EVM0010008 | LG3 | hypothetical protein POPTR_00 | not DE   | not DE   | not DE   | not DE  |
| EVM0006750 | LG3 | hypothetical protein POPTR_00 | not DE   | not DE   | not DE   | not DE  |
| EVM0024594 | LG3 | hypothetical protein POPTR_00 | not DE   | not DE   | not DE   | not DE  |
| EVM0008419 | LG3 | hypothetical protein POPTR_00 | not DE   | not DE   | not DE   | not DE  |
| EVM0014763 | LG3 | hypothetical protein POPTR_00 | not DE   | not DE   | not DE   | not DE  |
| EVM0017740 | LG3 | hypothetical protein POPTR_00 | 1.931234 | 4.71E-05 | not DE   | not DE  |
| EVM0011488 | LG3 | hypothetical protein POPTR_00 | not DE   | not DE   | not DE   | not DE  |
| EVM0000918 | LG3 | hypothetical protein POPTR_00 | not DE   | not DE   | not DE   | not DE  |
| EVM0008840 | LG3 | hypothetical protein POPTR_00 | not DE   | not DE   | not DE   | not DE  |
| EVM0009119 | LG3 | hypothetical protein POPTR_00 | not DE   | not DE   | not DE   | not DE  |
| EVM0004371 | LG3 | hypothetical protein POPTR_00 | 2.303311 | 0.001401 | not DE   | not DE  |
| EVM0005872 | LG3 | hypothetical protein POPTR_00 | not DE   | not DE   | not DE   | not DE  |
| EVM0023074 | LG3 | hypothetical protein POPTR_00 | not DE   | not DE   | not DE   | not DE  |
| EVM0000144 | LG3 | hypothetical protein POPTR_00 | not DE   | not DE   | not DE   | not DE  |
| EVM0016051 | LG3 | hypothetical protein POPTR_00 | not DE   | not DE   | not DE   | not DE  |
| EVM0021454 | LG3 | hypothetical protein POPTR_00 | not DE   | not DE   | not DE   | not DE  |
| EVM0003901 | LG3 | hypothetical protein POPTR_00 | not DE   | not DE   | not DE   | not DE  |
| EVM0021676 | LG3 | hypothetical protein POPTR_00 | not DE   | not DE   | not DE   | not DE  |
| EVM0002746 | LG3 | hypothetical protein POPTR_00 | not DE   | not DE   | not DE   | not DE  |
| EVM0008504 | LG3 | hypothetical protein POPTR_00 | not DE   | not DE   | not DE   | not DE  |
| EVM0023546 | LG3 | hypothetical protein POPTR_00 | not DE   | not DE   | 1.870986 | 0.01736 |
| EVM0008522 | LG3 | hypothetical protein POPTR_00 | not DE   | not DE   | not DE   | not DE  |
| EVM0023222 | LG3 | hypothetical protein POPTR_02 | not DE   | not DE   | not DE   | not DE  |
| EVM0016281 | LG3 | hypothetical protein PRUPE_pp | not DE   | not DE   | not DE   | not DE  |
| EVM0023042 | LG3 | hypothetical protein PRUPE_pp | 1.945818 | 0.02219  | not DE   | not DE  |
| EVM0020836 | LG3 | hypothetical protein PRUPE_pp | not DE   | not DE   | not DE   | not DE  |
| EVM0019695 | LG3 | hypothetical protein PRUPE_pp | not DE   | not DE   | not DE   | not DE  |
| EVM0021775 | LG3 | hypothetical protein PRUPE_pp | not DE   | not DE   | not DE   | not DE  |
| EVM0003604 | LG3 | hypothetical protein PRUPE_pp | not DE   | not DE   | not DE   | not DE  |
| EVM0007792 | LG3 | hypothetical protein PRUPE_pp | not DE   | not DE   | not DE   | not DE  |
| EVM0009723 | LG3 | hypothetical protein PRUPE_pp | not DE   | not DE   | not DE   | not DE  |
| EVM0009523 | LG3 | hypothetical protein PRUPE_pp | not DE   | not DE   | not DE   | not DE  |
| EVM0007922 | LG3 | hypothetical protein PRUPE_pp | not DE   | not DE   | not DE   | not DE  |
| EVM0022288 | LG3 | hypothetical protein PRUPE_pp | 1.510186 | 0.027361 | not DE   | not DE  |
| EVM0014451 | LG3 | hypothetical protein PRUPE_pp | 5.711334 | 0.000702 | not DE   | not DE  |
| EVM0022253 | LG3 | hypothetical protein PRUPE_pp | not DE   | not DE   | not DE   | not DE  |
| EVM0004772 | LG3 | hypothetical protein PRUPE_pp | not DE   | not DE   | not DE   | not DE  |
| EVM0002675 | LG3 | hypothetical protein PRUPE_pp | not DE   | not DE   | not DE   | not DE  |
| EVM0012361 | LG3 | hypothetical protein PRUPE_pp | not DE   | not DE   | not DE   | not DE  |
| EVM0015208 | LG3 | hypothetical protein PRUPE_pp | not DE   | not DE   | not DE   | not DE  |
| EVM0017711 | LG3 | hypothetical protein PRUPE_pp | not DE   | not DE   | not DE   | not DE  |

|            |     |                                |          |          |          |         |
|------------|-----|--------------------------------|----------|----------|----------|---------|
| EVM0024333 | LG3 | hypothetical protein PRUPE_pp  | not DE   | not DE   | not DE   | not DE  |
| EVM0008413 | LG3 | hypothetical protein PRUPE_pp  | not DE   | not DE   | not DE   | not DE  |
| EVM0024355 | LG3 | hypothetical protein PRUPE_pp  | not DE   | not DE   | not DE   | not DE  |
| EVM0017562 | LG3 | hypothetical protein PRUPE_pp  | not DE   | not DE   | not DE   | not DE  |
| EVM0003748 | LG3 | hypothetical protein PRUPE_pp  | not DE   | not DE   | not DE   | not DE  |
| EVM0008464 | LG3 | hypothetical protein PRUPE_pp  | not DE   | not DE   | not DE   | not DE  |
| EVM0015737 | LG3 | hypothetical protein SORBIDRA  | not DE   | not DE   | not DE   | not DE  |
| EVM0021435 | LG3 | hypothetical protein VITISV_C  | not DE   | not DE   | not DE   | not DE  |
| EVM0012744 | LG3 | hypothetical protein VITISV_C  | not DE   | not DE   | not DE   | not DE  |
| EVM0003220 | LG3 | hypothetical protein VITISV_C  | not DE   | not DE   | not DE   | not DE  |
| EVM0017731 | LG3 | hypothetical protein VITISV_C  | not DE   | not DE   | not DE   | not DE  |
| EVM0008388 | LG3 | hypothetical protein VITISV_C  | not DE   | not DE   | not DE   | not DE  |
| EVM0022460 | LG3 | hypothetical protein VITISV_C  | not DE   | not DE   | not DE   | not DE  |
| EVM0014416 | LG3 | hypothetical protein VITISV_C  | not DE   | not DE   | not DE   | not DE  |
| EVM0011826 | LG3 | hypothetical protein VITISV_C  | -2.06762 | 9.94E-07 | not DE   | not DE  |
| EVM0007906 | LG3 | importin alpha                 | not DE   | not DE   | not DE   | not DE  |
| EVM0009464 | LG3 | lipoxygenase                   | not DE   | not DE   | not DE   | not DE  |
| EVM0013716 | LG3 | lipoxygenase                   | not DE   | not DE   | not DE   | not DE  |
| EVM0024252 | LG3 | magnesium transporter CorA-li  | not DE   | not DE   | not DE   | not DE  |
| EVM0002639 | LG3 | male sterility protein 2       | not DE   | not DE   | not DE   | not DE  |
| EVM0003426 | LG3 | male sterility protein 2       | not DE   | not DE   | not DE   | not DE  |
| EVM0007023 | LG3 | male sterility protein 2       | not DE   | not DE   | not DE   | not DE  |
| EVM0019951 | LG3 | male sterility-related protein | not DE   | not DE   | not DE   | not DE  |
| EVM0017498 | LG3 | oligopeptide transporter, put  | not DE   | not DE   | not DE   | not DE  |
| EVM0018813 | LG3 | pectin methylesterase          | not DE   | not DE   | not DE   | not DE  |
| EVM0014967 | LG3 | peptidyl-prolyl cis-trans isc  | not DE   | not DE   | not DE   | not DE  |
| EVM0018204 | LG3 | peptidyl-prolyl cis-trans isc  | not DE   | not DE   | not DE   | not DE  |
| EVM0011579 | LG3 | phopholipase d alpha, putativ  | not DE   | not DE   | not DE   | not DE  |
| EVM0016895 | LG3 | phytochrome B                  | not DE   | not DE   | not DE   | not DE  |
| EVM0009815 | LG3 | phytoene desaturase            | not DE   | not DE   | not DE   | not DE  |
| EVM0000397 | LG3 | polygalacturonase family prot  | not DE   | not DE   | not DE   | not DE  |
| EVM0017707 | LG3 | polygalacturonase family prot  | not DE   | not DE   | not DE   | not DE  |
| EVM0012652 | LG3 | proline-rich protein precursor | not DE   | not DE   | -2.04201 | 0.02426 |
| EVM0007325 | LG3 | prolyl 4-hydroxylase alpha su  | not DE   | not DE   | not DE   | not DE  |
| EVM0015375 | LG3 | putative early light induced   | not DE   | not DE   | not DE   | not DE  |
| EVM0016781 | LG3 | putative glucosyltransferase   | not DE   | not DE   | not DE   | not DE  |
| EVM0021751 | LG3 | putative inositol transporter  | 1.781272 | 0.002072 | not DE   | not DE  |
| EVM0012126 | LG3 | putative monogalactosyldiacyl  | not DE   | not DE   | not DE   | not DE  |
| EVM0002997 | LG3 | rapid alkalization factor p    | not DE   | not DE   | not DE   | not DE  |
| EVM0014004 | LG3 | replication factor c large su  | not DE   | not DE   | not DE   | not DE  |
| EVM0001206 | LG3 | rhomboid family protein        | not DE   | not DE   | not DE   | not DE  |
| EVM0014502 | LG3 | ribosomal protein L17-like pr  | not DE   | not DE   | not DE   | not DE  |
| EVM0021388 | LG3 | ribosomal protein L29          | not DE   | not DE   | not DE   | not DE  |
| EVM0022913 | LG3 | ribosomal protein S9, putativ  | not DE   | not DE   | not DE   | not DE  |
| EVM0009673 | LG3 | sesquiterpene synthase         | not DE   | not DE   | not DE   | not DE  |
| EVM0009784 | LG3 | spermidine synthase, partial   | not DE   | not DE   | not DE   | not DE  |
| EVM0019677 | LG3 | spermidine synthase, partial   | not DE   | not DE   | not DE   | not DE  |
| EVM0001262 | LG3 | tonoplast intrinsic protein,   | -2.17709 | 7.62E-06 | not DE   | not DE  |
| EVM0020990 | LG3 | transcription factor, putativ  | not DE   | not DE   | not DE   | not DE  |
| EVM0022167 | LG3 | transferase, putative          | not DE   | not DE   | not DE   | not DE  |
| EVM0008722 | LG3 | translationally controlled tu  | not DE   | not DE   | not DE   | not DE  |
| EVM0018771 | LG3 | translationally controlled tu  | not DE   | not DE   | not DE   | not DE  |
| EVM0003731 | LG3 | type III polyketide synthase   | not DE   | not DE   | not DE   | not DE  |
| EVM0003928 | LG3 | uncharacterized protein LOC10  | not DE   | not DE   | not DE   | not DE  |

|            |     |                               |          |          |          |         |
|------------|-----|-------------------------------|----------|----------|----------|---------|
| EVM0007816 | LG3 | uncharacterized protein LOC10 | not DE   | not DE   | not DE   | not DE  |
| EVM0011214 | LG3 | uncharacterized protein LOC10 | not DE   | not DE   | not DE   | not DE  |
| EVM0022185 | LG3 | uncharacterized protein LOC10 | not DE   | not DE   | not DE   | not DE  |
| EVM0000354 | LG3 | unknown protein               | not DE   | not DE   | not DE   | not DE  |
| EVM0001240 | LG3 | unknown protein               | 2.082111 | 0.003472 | 2.713421 | #####   |
| EVM0002007 | LG3 | unknown protein               | not DE   | not DE   | not DE   | not DE  |
| EVM0003025 | LG3 | unknown protein               | -1.44809 | 0.043422 | not DE   | not DE  |
| EVM0003603 | LG3 | unknown protein               | not DE   | not DE   | not DE   | not DE  |
| EVM0003916 | LG3 | unknown protein               | not DE   | not DE   | not DE   | not DE  |
| EVM0004068 | LG3 | unknown protein               | not DE   | not DE   | not DE   | not DE  |
| EVM0004770 | LG3 | unknown protein               | not DE   | not DE   | not DE   | not DE  |
| EVM0004806 | LG3 | unknown protein               | not DE   | not DE   | not DE   | not DE  |
| EVM0005662 | LG3 | unknown protein               | not DE   | not DE   | not DE   | not DE  |
| EVM0005755 | LG3 | unknown protein               | 1.873605 | 0.014608 | 1.725953 | 0.00064 |
| EVM0006535 | LG3 | unknown protein               | not DE   | not DE   | not DE   | not DE  |
| EVM0006930 | LG3 | unknown protein               | not DE   | not DE   | not DE   | not DE  |
| EVM0007174 | LG3 | unknown protein               | not DE   | not DE   | not DE   | not DE  |
| EVM0010002 | LG3 | unknown protein               | not DE   | not DE   | not DE   | not DE  |
| EVM0011077 | LG3 | unknown protein               | not DE   | not DE   | not DE   | not DE  |
| EVM0011319 | LG3 | unknown protein               | not DE   | not DE   | not DE   | not DE  |
| EVM0012079 | LG3 | unknown protein               | not DE   | not DE   | not DE   | not DE  |
| EVM0012542 | LG3 | unknown protein               | not DE   | not DE   | not DE   | not DE  |
| EVM0013083 | LG3 | unknown protein               | not DE   | not DE   | not DE   | not DE  |
| EVM0013321 | LG3 | unknown protein               | not DE   | not DE   | not DE   | not DE  |
| EVM0014928 | LG3 | unknown protein               | 2.589466 | 0.022982 | not DE   | not DE  |
| EVM0015320 | LG3 | unknown protein               | not DE   | not DE   | not DE   | not DE  |
| EVM0015958 | LG3 | unknown protein               | not DE   | not DE   | not DE   | not DE  |
| EVM0016328 | LG3 | unknown protein               | not DE   | not DE   | not DE   | not DE  |
| EVM0016849 | LG3 | unknown protein               | not DE   | not DE   | not DE   | not DE  |
| EVM0018273 | LG3 | unknown protein               | not DE   | not DE   | not DE   | not DE  |
| EVM0018528 | LG3 | unknown protein               | not DE   | not DE   | not DE   | not DE  |
| EVM0019559 | LG3 | unknown protein               | not DE   | not DE   | not DE   | not DE  |
| EVM0019788 | LG3 | unknown protein               | not DE   | not DE   | not DE   | not DE  |
| EVM0020554 | LG3 | unknown protein               | not DE   | not DE   | not DE   | not DE  |
| EVM0021239 | LG3 | unknown protein               | not DE   | not DE   | not DE   | not DE  |
| EVM0022096 | LG3 | unknown protein               | not DE   | not DE   | not DE   | not DE  |
| EVM0022766 | LG3 | unknown protein               | not DE   | not DE   | not DE   | not DE  |
| EVM0024309 | LG3 | unknown protein               | not DE   | not DE   | not DE   | not DE  |
| EVM0000613 | LG3 | unnamed protein product       | not DE   | not DE   | not DE   | not DE  |
| EVM0001975 | LG3 | unnamed protein product       | not DE   | not DE   | not DE   | not DE  |
| EVM0002406 | LG3 | unnamed protein product       | not DE   | not DE   | not DE   | not DE  |
| EVM0003006 | LG3 | unnamed protein product       | not DE   | not DE   | not DE   | not DE  |
| EVM0003214 | LG3 | unnamed protein product       | not DE   | not DE   | not DE   | not DE  |
| EVM0004220 | LG3 | unnamed protein product       | not DE   | not DE   | not DE   | not DE  |
| EVM0005183 | LG3 | unnamed protein product       | 2.251002 | 0.030556 | not DE   | not DE  |
| EVM0006649 | LG3 | unnamed protein product       | not DE   | not DE   | not DE   | not DE  |
| EVM0007107 | LG3 | unnamed protein product       | not DE   | not DE   | not DE   | not DE  |
| EVM0007196 | LG3 | unnamed protein product       | not DE   | not DE   | not DE   | not DE  |
| EVM0009562 | LG3 | unnamed protein product       | not DE   | not DE   | not DE   | not DE  |
| EVM0010268 | LG3 | unnamed protein product       | not DE   | not DE   | 1.022008 | 0.00729 |
| EVM0010539 | LG3 | unnamed protein product       | -1.58402 | 0.001606 | 1.449993 | 0.04134 |
| EVM0011556 | LG3 | unnamed protein product       | not DE   | not DE   | not DE   | not DE  |
| EVM0013905 | LG3 | unnamed protein product       | not DE   | not DE   | not DE   | not DE  |
| EVM0014906 | LG3 | unnamed protein product       | not DE   | not DE   | not DE   | not DE  |

|            |     |                                            |          |          |          |        |
|------------|-----|--------------------------------------------|----------|----------|----------|--------|
| EVM0016684 | LG3 | unnamed protein product                    | not DE   | not DE   | not DE   | not DE |
| EVM0018019 | LG3 | unnamed protein product                    | not DE   | not DE   | not DE   | not DE |
| EVM0019895 | LG3 | unnamed protein product                    | not DE   | not DE   | not DE   | not DE |
| EVM0021475 | LG3 | unnamed protein product                    | not DE   | not DE   | not DE   | not DE |
| EVM0022978 | LG3 | unnamed protein product                    | not DE   | not DE   | not DE   | not DE |
| EVM0023470 | LG3 | unnamed protein product                    | not DE   | not DE   | not DE   | not DE |
| EVM0011056 | LG3 | xyloglucan endotransglycosylase            | not DE   | not DE   | not DE   | not DE |
| EVM0011336 | LG3 | zinc finger family protein                 | not DE   | not DE   | not DE   | not DE |
| EVM0008607 | LG4 | (3S, 6E)-nerolidol synthase 2              | not DE   | not DE   | not DE   | not DE |
| EVM0019933 | LG4 | 1-aminocyclopropane-1-carboxylate synthase | not DE   | not DE   | not DE   | not DE |
| EVM0007419 | LG4 | 1-aminocyclopropane-1-carboxylate synthase | not DE   | not DE   | not DE   | not DE |
| EVM0005346 | LG4 | 12-oxophytodienoate reductase 1            | not DE   | not DE   | not DE   | not DE |
| EVM0008039 | LG4 | 12-oxophytodienoate reductase 1            | not DE   | not DE   | not DE   | not DE |
| EVM0008245 | LG4 | 12-oxophytodienoate reductase 1            | 5.952949 | 0.000343 | not DE   | not DE |
| EVM0014782 | LG4 | 12-oxophytodienoate reductase 1            | not DE   | not DE   | not DE   | not DE |
| EVM0021315 | LG4 | 12-oxophytodienoate reductase 1            | not DE   | not DE   | not DE   | not DE |
| EVM0021504 | LG4 | 12-oxophytodienoate reductase 1            | not DE   | not DE   | not DE   | not DE |
| EVM0004493 | LG4 | 12-oxophytodienoate reductase 1            | not DE   | not DE   | not DE   | not DE |
| EVM0020127 | LG4 | 16.9 kDa class I heat shock protein        | not DE   | not DE   | not DE   | not DE |
| EVM0002234 | LG4 | 2-oxoisovalerate dehydrogenase             | not DE   | not DE   | not DE   | not DE |
| EVM0022839 | LG4 | 3-ketoacyl-CoA synthase 4-like             | not DE   | not DE   | not DE   | not DE |
| EVM0012062 | LG4 | 30S ribosomal protein S13, chain 1         | not DE   | not DE   | not DE   | not DE |
| EVM0002523 | LG4 | 30S ribosomal protein S9, chain 1          | not DE   | not DE   | not DE   | not DE |
| EVM0008150 | LG4 | 30S ribosomal protein S9, chain 1          | not DE   | not DE   | not DE   | not DE |
| EVM0019178 | LG4 | 31 kDa ribonucleoprotein, chain 1          | not DE   | not DE   | not DE   | not DE |
| EVM0015484 | LG4 | 39S ribosomal protein L41-A, chain 1       | not DE   | not DE   | not DE   | not DE |
| EVM0024568 | LG4 | 39S ribosomal protein L41-A, chain 1       | not DE   | not DE   | not DE   | not DE |
| EVM0008153 | LG4 | 4-coumarate--CoA ligase-like protein       | not DE   | not DE   | not DE   | not DE |
| EVM0011361 | LG4 | 4-coumarate--CoA ligase-like protein       | not DE   | not DE   | not DE   | not DE |
| EVM0014968 | LG4 | 4-coumarate--CoA ligase-like protein       | not DE   | not DE   | not DE   | not DE |
| EVM0019307 | LG4 | 4-coumarate--CoA ligase-like protein       | not DE   | not DE   | not DE   | not DE |
| EVM0019992 | LG4 | 40S ribosomal protein S29-like             | not DE   | not DE   | not DE   | not DE |
| EVM0015936 | LG4 | 5'-3' exoribonuclease                      | not DE   | not DE   | not DE   | not DE |
| EVM0018111 | LG4 | 5'-adenylylsulfate reductase               | not DE   | not DE   | not DE   | not DE |
| EVM0024223 | LG4 | 5'-adenylylsulfate reductase               | not DE   | not DE   | not DE   | not DE |
| EVM0023468 | LG4 | 50S ribosomal protein 6, chain 1           | not DE   | not DE   | not DE   | not DE |
| EVM0024419 | LG4 | 50S ribosomal protein L31, chain 1         | not DE   | not DE   | not DE   | not DE |
| EVM0012395 | LG4 | ABC transporter B family member            | not DE   | not DE   | not DE   | not DE |
| EVM0023988 | LG4 | ABC transporter G family member            | not DE   | not DE   | not DE   | not DE |
| EVM0005803 | LG4 | ABC transporter G family member            | not DE   | not DE   | not DE   | not DE |
| EVM0003846 | LG4 | AP-4 complex subunit mu-like               | not DE   | not DE   | not DE   | not DE |
| EVM0014680 | LG4 | AP-4 complex subunit mu-like               | not DE   | not DE   | not DE   | not DE |
| EVM0005722 | LG4 | ATP synthase delta chain, chain 1          | -1.65194 | 0.008554 | not DE   | not DE |
| EVM0002729 | LG4 | ATP-dependent RNA helicase A               | not DE   | not DE   | not DE   | not DE |
| EVM0010966 | LG4 | B2 protein-like                            | not DE   | not DE   | not DE   | not DE |
| EVM0021535 | LG4 | B3 domain-containing protein               | not DE   | not DE   | not DE   | not DE |
| EVM0003970 | LG4 | B3 domain-containing protein               | not DE   | not DE   | not DE   | not DE |
| EVM0003724 | LG4 | BEACH domain-containing protein            | not DE   | not DE   | -1.82508 | #####  |
| EVM0007615 | LG4 | BEL1-like homeodomain protein              | not DE   | not DE   | not DE   | not DE |
| EVM0018497 | LG4 | BRI1 kinase inhibitor 1-like               | not DE   | not DE   | not DE   | not DE |
| EVM0003209 | LG4 | BTB/POZ domain-containing protein          | -2.4233  | 0.027299 | -3.89679 | #####  |
| EVM0012156 | LG4 | CST complex subunit CTC1-like              | not DE   | not DE   | not DE   | not DE |
| EVM0012650 | LG4 | DEAD-box ATP-dependent RNA helicase        | not DE   | not DE   | not DE   | not DE |
| EVM0021031 | LG4 | DEAD-box ATP-dependent RNA helicase        | not DE   | not DE   | not DE   | not DE |

|            |     |                              |          |          |          |         |
|------------|-----|------------------------------|----------|----------|----------|---------|
| EVM0023189 | LG4 | DEAD-box ATP-dependent RNA h | not DE   | not DE   | not DE   | not DE  |
| EVM0016082 | LG4 | DNA excision repair protein  | not DE   | not DE   | not DE   | not DE  |
| EVM0021612 | LG4 | DNA-3-methyladenine glycosyl | not DE   | not DE   | not DE   | not DE  |
| EVM0019411 | LG4 | DUF21 domain-containing prot | not DE   | not DE   | not DE   | not DE  |
| EVM0014877 | LG4 | E3 ubiquitin ligase BIG BRO  | not DE   | not DE   | not DE   | not DE  |
| EVM0018566 | LG4 | E3 ubiquitin-protein ligase  | not DE   | not DE   | not DE   | not DE  |
| EVM0016064 | LG4 | E3 ubiquitin-protein ligase  | not DE   | not DE   | not DE   | not DE  |
| EVM0019614 | LG4 | E3 ubiquitin-protein ligase  | not DE   | not DE   | not DE   | not DE  |
| EVM0008939 | LG4 | E3 ubiquitin-protein ligase  | not DE   | not DE   | not DE   | not DE  |
| EVM0009518 | LG4 | F-box protein At3g12350-like | not DE   | not DE   | not DE   | not DE  |
| EVM0011008 | LG4 | F-box protein At5g03970-like | not DE   | not DE   | not DE   | not DE  |
| EVM0014474 | LG4 | F-box protein CPR30-like     | not DE   | not DE   | not DE   | not DE  |
| EVM0017185 | LG4 | F-box protein CPR30-like     | not DE   | not DE   | not DE   | not DE  |
| EVM0020404 | LG4 | F-box protein CPR30-like isc | not DE   | not DE   | not DE   | not DE  |
| EVM0016333 | LG4 | F-box/kelch-repeat protein A | not DE   | not DE   | not DE   | not DE  |
| EVM0007030 | LG4 | Fanconi anemia group J prote | not DE   | not DE   | not DE   | not DE  |
| EVM0006558 | LG4 | G-box-binding factor 4-like  | not DE   | not DE   | not DE   | not DE  |
| EVM0002917 | LG4 | GDSL esterase/lipase At1g338 | not DE   | not DE   | not DE   | not DE  |
| EVM0008606 | LG4 | GDSL esterase/lipase At1g716 | not DE   | not DE   | not DE   | not DE  |
| EVM0014042 | LG4 | GDSL esterase/lipase At4g162 | not DE   | not DE   | not DE   | not DE  |
| EVM0019552 | LG4 | GDSL esterase/lipase At5g629 | not DE   | not DE   | not DE   | not DE  |
| EVM0019897 | LG4 | GEM-like protein 1-like      | not DE   | not DE   | not DE   | not DE  |
| EVM0012078 | LG4 | HVA22-like protein i-like    | not DE   | not DE   | not DE   | not DE  |
| EVM0023696 | LG4 | J domain-containing protein  | not DE   | not DE   | not DE   | not DE  |
| EVM0015653 | LG4 | LIM domain-containing protei | not DE   | not DE   | 1.627441 | #####   |
| EVM0017652 | LG4 | LOW QUALITY PROTEIN: N-acety | not DE   | not DE   | not DE   | not DE  |
| EVM0019449 | LG4 | MADS-box transcription facto | not DE   | not DE   | not DE   | not DE  |
| EVM0020080 | LG4 | MATE efflux family protein 5 | not DE   | not DE   | not DE   | not DE  |
| EVM0009782 | LG4 | MATE efflux family protein 5 | not DE   | not DE   | not DE   | not DE  |
| EVM0008683 | LG4 | MLO-like protein 1-like      | not DE   | not DE   | not DE   | not DE  |
| EVM0024232 | LG4 | MLO-like protein 9-like      | not DE   | not DE   | not DE   | not DE  |
| EVM0014255 | LG4 | NAC domain-containing protei | not DE   | not DE   | not DE   | not DE  |
| EVM0018517 | LG4 | NAC domain-containing protei | not DE   | not DE   | not DE   | not DE  |
| EVM0012077 | LG4 | NAD(P)H-quinone oxidoreducta | -1.21918 | 0.002574 | not DE   | not DE  |
| EVM0017614 | LG4 | O-acyltransferase WSD1-like  | not DE   | not DE   | not DE   | not DE  |
| EVM0003811 | LG4 | RING finger protein 148-like | 3.385616 | 0.013525 | not DE   | not DE  |
| EVM0008631 | LG4 | RING-H2 finger protein ATL54 | not DE   | not DE   | not DE   | not DE  |
| EVM0012639 | LG4 | RING-H2 finger protein ATL54 | not DE   | not DE   | not DE   | not DE  |
| EVM0020018 | LG4 | RNA pseudouridine synthase 2 | not DE   | not DE   | not DE   | not DE  |
| EVM0005773 | LG4 | RNA-binding protein FUS-like | not DE   | not DE   | not DE   | not DE  |
| EVM0007624 | LG4 | S-type anion channel SLAH1-l | not DE   | not DE   | not DE   | not DE  |
| EVM0010225 | LG4 | SCY1-like protein 2-like     | 2.100871 | 0.000378 | not DE   | not DE  |
| EVM0017774 | LG4 | SCY1-like protein 2-like     | not DE   | not DE   | not DE   | not DE  |
| EVM0001024 | LG4 | SUMO-conjugating enzyme SCE1 | not DE   | not DE   | not DE   | not DE  |
| EVM0023782 | LG4 | SUMO-conjugating enzyme SCE1 | not DE   | not DE   | not DE   | not DE  |
| EVM0024444 | LG4 | SUMO-conjugating enzyme SCE1 | not DE   | not DE   | not DE   | not DE  |
| EVM0019176 | LG4 | SWI/SNF complex subunit SWI3 | not DE   | not DE   | not DE   | not DE  |
| EVM0002474 | LG4 | T-complex protein 1 subunit  | not DE   | not DE   | not DE   | not DE  |
| EVM0002692 | LG4 | THO complex subunit 5 homolo | not DE   | not DE   | not DE   | not DE  |
| EVM0002256 | LG4 | TMV resistance protein N-lik | not DE   | not DE   | not DE   | not DE  |
| EVM0003631 | LG4 | TMV resistance protein N-lik | not DE   | not DE   | not DE   | not DE  |
| EVM0005358 | LG4 | TMV resistance protein N-lik | not DE   | not DE   | -1.87225 | 0.02372 |
| EVM0006762 | LG4 | TMV resistance protein N-lik | not DE   | not DE   | not DE   | not DE  |
| EVM0007295 | LG4 | TMV resistance protein N-lik | not DE   | not DE   | not DE   | not DE  |

|            |     |                              |          |          |          |         |
|------------|-----|------------------------------|----------|----------|----------|---------|
| EVM0010702 | LG4 | TMV resistance protein N-lik | not DE   | not DE   | not DE   | not DE  |
| EVM0010916 | LG4 | TMV resistance protein N-lik | not DE   | not DE   | not DE   | not DE  |
| EVM0011025 | LG4 | TMV resistance protein N-lik | not DE   | not DE   | not DE   | not DE  |
| EVM0014259 | LG4 | TMV resistance protein N-lik | not DE   | not DE   | not DE   | not DE  |
| EVM0014613 | LG4 | TMV resistance protein N-lik | not DE   | not DE   | not DE   | not DE  |
| EVM0016195 | LG4 | TMV resistance protein N-lik | not DE   | not DE   | not DE   | not DE  |
| EVM0017162 | LG4 | TMV resistance protein N-lik | not DE   | not DE   | not DE   | not DE  |
| EVM0017995 | LG4 | TMV resistance protein N-lik | not DE   | not DE   | not DE   | not DE  |
| EVM0019087 | LG4 | TMV resistance protein N-lik | not DE   | not DE   | not DE   | not DE  |
| EVM0005951 | LG4 | TMV resistance protein N-lik | not DE   | not DE   | not DE   | not DE  |
| EVM0007239 | LG4 | TMV resistance protein N-lik | not DE   | not DE   | not DE   | not DE  |
| EVM0009193 | LG4 | TMV resistance protein N-lik | not DE   | not DE   | not DE   | not DE  |
| EVM0009607 | LG4 | TMV resistance protein N-lik | not DE   | not DE   | not DE   | not DE  |
| EVM0017831 | LG4 | TMV resistance protein N-lik | not DE   | not DE   | not DE   | not DE  |
| EVM0001851 | LG4 | TMV resistance protein N-lik | not DE   | not DE   | not DE   | not DE  |
| EVM0002691 | LG4 | TMV resistance protein N-lik | not DE   | not DE   | not DE   | not DE  |
| EVM0005093 | LG4 | TMV resistance protein N-lik | not DE   | not DE   | not DE   | not DE  |
| EVM0007595 | LG4 | TMV resistance protein N-lik | not DE   | not DE   | not DE   | not DE  |
| EVM0015435 | LG4 | TMV resistance protein N-lik | not DE   | not DE   | not DE   | not DE  |
| EVM0019530 | LG4 | TMV resistance protein N-lik | not DE   | not DE   | not DE   | not DE  |
| EVM0021290 | LG4 | TMV resistance protein N-lik | not DE   | not DE   | not DE   | not DE  |
| EVM0023055 | LG4 | TMV resistance protein N-lik | not DE   | not DE   | 1.576034 | 0.02245 |
| EVM0023537 | LG4 | TMV resistance protein N-lik | not DE   | not DE   | not DE   | not DE  |
| EVM0017257 | LG4 | TMV resistance protein N-lik | not DE   | not DE   | not DE   | not DE  |
| EVM0019941 | LG4 | TPR repeat-containing thio   | not DE   | not DE   | not DE   | not DE  |
| EVM0020148 | LG4 | U-box domain-containing prot | not DE   | not DE   | not DE   | not DE  |
| EVM0008185 | LG4 | U5 small nuclear ribonucleop | not DE   | not DE   | -1.12834 | #####   |
| EVM0020185 | LG4 | UDP-glucose flavonoid 3-0-gl | not DE   | not DE   | not DE   | not DE  |
| EVM0012563 | LG4 | UDP-glucuronate:xylan alpha- | not DE   | not DE   | not DE   | not DE  |
| EVM0006117 | LG4 | UDP-glycosyltransferase 85A2 | not DE   | not DE   | not DE   | not DE  |
| EVM0006412 | LG4 | UPF0496 protein Atlg20180-li | not DE   | not DE   | not DE   | not DE  |
| EVM0011993 | LG4 | UPF0695 membrane protein YPL | not DE   | not DE   | not DE   | not DE  |
| EVM0016341 | LG4 | V-type proton ATPase subunit | not DE   | not DE   | not DE   | not DE  |
| EVM0018788 | LG4 | V-type proton ATPase subunit | not DE   | not DE   | not DE   | not DE  |
| EVM0022136 | LG4 | WAT1-related protein Atlg218 | not DE   | not DE   | not DE   | not DE  |
| EVM0016742 | LG4 | WAT1-related protein At4g082 | not DE   | not DE   | not DE   | not DE  |
| EVM0013817 | LG4 | WD repeat-containing protein | 1.112218 | 0.009308 | not DE   | not DE  |
| EVM0023769 | LG4 | WEB family protein Atlg75720 | not DE   | not DE   | not DE   | not DE  |
| EVM0006695 | LG4 | XIAP-associated factor 1-lik | not DE   | not DE   | not DE   | not DE  |
| EVM0000933 | LG4 | abscisic acid 8&apos;-hydrox | not DE   | not DE   | not DE   | not DE  |
| EVM0003247 | LG4 | abscisic acid 8&apos;-hydrox | not DE   | not DE   | not DE   | not DE  |
| EVM0006551 | LG4 | activating signal cointegrat | not DE   | not DE   | not DE   | not DE  |
| EVM0014466 | LG4 | acyl-CoA-binding domain-cont | not DE   | not DE   | not DE   | not DE  |
| EVM0005592 | LG4 | adenylate kinase 2, chloropl | not DE   | not DE   | not DE   | not DE  |
| EVM0016738 | LG4 | agamous-like MADS-box protei | not DE   | not DE   | not DE   | not DE  |
| EVM0001294 | LG4 | agamous-like MADS-box protei | not DE   | not DE   | not DE   | not DE  |
| EVM0014206 | LG4 | alcohol dehydrogenase-like   | not DE   | not DE   | not DE   | not DE  |
| EVM0003140 | LG4 | alkaline/neutral invertase C | not DE   | not DE   | not DE   | not DE  |
| EVM0007087 | LG4 | alkaline/neutral invertase C | not DE   | not DE   | not DE   | not DE  |
| EVM0007819 | LG4 | alpha-(1,4)-fucosyltransfera | not DE   | not DE   | not DE   | not DE  |
| EVM0017264 | LG4 | alpha-(1,4)-fucosyltransfera | not DE   | not DE   | not DE   | not DE  |
| EVM0017120 | LG4 | alpha-glucan water dikinase  | -1.36442 | 0.041633 | not DE   | not DE  |
| EVM0004646 | LG4 | amino acid permease 8-like i | not DE   | not DE   | not DE   | not DE  |
| EVM0022861 | LG4 | aminoacylase-1-like          | not DE   | not DE   | not DE   | not DE  |

|            |     |                               |          |          |          |         |
|------------|-----|-------------------------------|----------|----------|----------|---------|
| EVM0013153 | LG4 | aquaporin NIP1-1-like         | not DE   | not DE   | not DE   | not DE  |
| EVM0003312 | LG4 | argininosuccinate lyase, chl  | not DE   | not DE   | not DE   | not DE  |
| EVM0003088 | LG4 | aspartic proteinase Asp1-like | not DE   | not DE   | not DE   | not DE  |
| EVM0016388 | LG4 | auxilin-like protein 1-like   | not DE   | not DE   | not DE   | not DE  |
| EVM0002013 | LG4 | auxin-responsive protein IAA  | not DE   | not DE   | not DE   | not DE  |
| EVM0002988 | LG4 | beta-galactosidase 16-like i  | not DE   | not DE   | not DE   | not DE  |
| EVM0008421 | LG4 | bifunctional aspartokinase/h  | not DE   | not DE   | not DE   | not DE  |
| EVM0022641 | LG4 | branched-chain-amino-acid am  | not DE   | not DE   | not DE   | not DE  |
| EVM0020642 | LG4 | calcium-binding protein CML3  | not DE   | not DE   | not DE   | not DE  |
| EVM0018937 | LG4 | calcium-dependent protein ki  | -1.72096 | 0.000239 | not DE   | not DE  |
| EVM0023734 | LG4 | calcium-transporting ATPase   | not DE   | not DE   | not DE   | not DE  |
| EVM0011390 | LG4 | calcium-transporting ATPase   | not DE   | not DE   | not DE   | not DE  |
| EVM0008487 | LG4 | calvin cycle protein CP12-3,  | not DE   | not DE   | not DE   | not DE  |
| EVM0010217 | LG4 | carboxypeptidase D-like isof  | not DE   | not DE   | not DE   | not DE  |
| EVM0005632 | LG4 | casbene synthase, chloroplas  | not DE   | not DE   | not DE   | not DE  |
| EVM0010632 | LG4 | casbene synthase, chloroplas  | not DE   | not DE   | not DE   | not DE  |
| EVM0000740 | LG4 | centromere-associated protei  | 1.493751 | 0.005049 | not DE   | not DE  |
| EVM0011739 | LG4 | chaperone protein dnaJ 1, mi  | not DE   | not DE   | not DE   | not DE  |
| EVM0009423 | LG4 | chlorophyll a-b binding prot  | not DE   | not DE   | not DE   | not DE  |
| EVM0022624 | LG4 | chlorophyllide a oxygenase,   | not DE   | not DE   | not DE   | not DE  |
| EVM0004364 | LG4 | chromosome-associated kinesin | not DE   | not DE   | not DE   | not DE  |
| EVM0000055 | LG4 | chromosome-associated kinesin | not DE   | not DE   | not DE   | not DE  |
| EVM0021555 | LG4 | cirhin-like                   | not DE   | not DE   | not DE   | not DE  |
| EVM0023125 | LG4 | citrate-binding protein-like  | not DE   | not DE   | not DE   | not DE  |
| EVM0020553 | LG4 | classical arabinogalactan pr  | not DE   | not DE   | not DE   | not DE  |
| EVM0023628 | LG4 | cyclin-A1-1-like              | not DE   | not DE   | not DE   | not DE  |
| EVM0017996 | LG4 | cyclin-B2-4-like              | not DE   | not DE   | not DE   | not DE  |
| EVM0002412 | LG4 | cysteine proteinase 15A-like  | not DE   | not DE   | not DE   | not DE  |
| EVM0002911 | LG4 | cysteine proteinase 15A-like  | not DE   | not DE   | not DE   | not DE  |
| EVM0002102 | LG4 | cysteine proteinase RD21a-li  | 1.952948 | 0.018768 | not DE   | not DE  |
| EVM0002613 | LG4 | cytochrome P450 734A1-like    | not DE   | not DE   | not DE   | not DE  |
| EVM0015756 | LG4 | cytochrome P450 734A1-like    | not DE   | not DE   | not DE   | not DE  |
| EVM0013482 | LG4 | cytochrome P450 78A7-like     | not DE   | not DE   | not DE   | not DE  |
| EVM0022576 | LG4 | cytochrome P450 81D1-like     | not DE   | not DE   | not DE   | not DE  |
| EVM0022826 | LG4 | cytochrome P450 81D1-like     | not DE   | not DE   | not DE   | not DE  |
| EVM0018951 | LG4 | cytochrome P450 81E8-like     | not DE   | not DE   | not DE   | not DE  |
| EVM0019495 | LG4 | cytochrome P450 81E8-like     | not DE   | not DE   | not DE   | not DE  |
| EVM0007474 | LG4 | cytochrome P450 82A3-like     | not DE   | not DE   | not DE   | not DE  |
| EVM0023191 | LG4 | cytochrome P450 82C4-like     | not DE   | not DE   | not DE   | not DE  |
| EVM0012027 | LG4 | cytochrome b-c1 complex subu  | not DE   | not DE   | 1.220713 | 0.00053 |
| EVM0018805 | LG4 | cytochrome b5                 | not DE   | not DE   | not DE   | not DE  |
| EVM0023927 | LG4 | cytokinin dehydrogenase 5-li  | not DE   | not DE   | not DE   | not DE  |
| EVM0020813 | LG4 | cytoplasmic tRNA 2-thiolatio  | not DE   | not DE   | not DE   | not DE  |
| EVM0017990 | LG4 | d-3-phosphoglycerate dehydro  | not DE   | not DE   | not DE   | not DE  |
| EVM0015453 | LG4 | deSI-like protein At4g17486   | not DE   | not DE   | not DE   | not DE  |
| EVM0006523 | LG4 | dehydration-responsive eleme  | not DE   | not DE   | not DE   | not DE  |
| EVM0021776 | LG4 | dihydrolipoyllysine-residue   | not DE   | not DE   | not DE   | not DE  |
| EVM0001918 | LG4 | dipeptidyl-peptidase 5-like   | not DE   | not DE   | not DE   | not DE  |
| EVM0010961 | LG4 | dnaJ-related protein SCJ1-li  | not DE   | not DE   | 1.084421 | #####   |
| EVM0022033 | LG4 | dolichyl-diphosphooligosacch  | not DE   | not DE   | not DE   | not DE  |
| EVM0017143 | LG4 | dynamamin-2B-like isoform X2  | not DE   | not DE   | not DE   | not DE  |
| EVM0009453 | LG4 | egg cell-secreted protein 1.  | not DE   | not DE   | not DE   | not DE  |
| EVM0006006 | LG4 | elongation of fatty acids pro | not DE   | not DE   | not DE   | not DE  |
| EVM0013433 | LG4 | embryogenesis-associated pro  | not DE   | not DE   | not DE   | not DE  |

|            |     |                              |          |          |          |         |
|------------|-----|------------------------------|----------|----------|----------|---------|
| EVM0007033 | LG4 | endoplasmic reticulum-Golgi  | not DE   | not DE   | not DE   | not DE  |
| EVM0017015 | LG4 | endoplasmin homolog          | -3.79816 | 1.04E-09 | -3.03969 | #####   |
| EVM0022108 | LG4 | ent-kaurene oxidase, chlorop | not DE   | not DE   | not DE   | not DE  |
| EVM0020423 | LG4 | ergosterol biosynthetic prot | not DE   | not DE   | not DE   | not DE  |
| EVM0012018 | LG4 | ethylene-responsive transcri | not DE   | not DE   | not DE   | not DE  |
| EVM0012620 | LG4 | ethylene-responsive transcri | not DE   | not DE   | not DE   | not DE  |
| EVM0010492 | LG4 | ethylene-responsive transcri | not DE   | not DE   | not DE   | not DE  |
| EVM0013648 | LG4 | ethylene-responsive transcri | not DE   | not DE   | not DE   | not DE  |
| EVM0023237 | LG4 | ethylene-responsive transcri | not DE   | not DE   | not DE   | not DE  |
| EVM0023269 | LG4 | ethylene-responsive transcri | not DE   | not DE   | not DE   | not DE  |
| EVM0004634 | LG4 | ethylene-responsive transcri | not DE   | not DE   | not DE   | not DE  |
| EVM0012951 | LG4 | ethylene-responsive transcri | not DE   | not DE   | not DE   | not DE  |
| EVM0005850 | LG4 | ethylene-responsive transcri | 4.535293 | 2.71E-06 | not DE   | not DE  |
| EVM0008062 | LG4 | ethylene-responsive transcri | not DE   | not DE   | not DE   | not DE  |
| EVM0007352 | LG4 | ethylene-responsive transcri | not DE   | not DE   | not DE   | not DE  |
| EVM0000174 | LG4 | eukaryotic translation initi | not DE   | not DE   | not DE   | not DE  |
| EVM0013990 | LG4 | eukaryotic translation initi | not DE   | not DE   | not DE   | not DE  |
| EVM0021921 | LG4 | eukaryotic translation initi | not DE   | not DE   | not DE   | not DE  |
| EVM0013701 | LG4 | eukaryotic translation initi | not DE   | not DE   | not DE   | not DE  |
| EVM0002109 | LG4 | exocyst complex component EX | not DE   | not DE   | not DE   | not DE  |
| EVM0003493 | LG4 | exocyst complex component SE | -1.39086 | 0.044117 | -1.35593 | 0.0036  |
| EVM0008399 | LG4 | exocyst complex component SE | not DE   | not DE   | not DE   | not DE  |
| EVM0017882 | LG4 | exocyst complex component SE | not DE   | not DE   | not DE   | not DE  |
| EVM0009075 | LG4 | expansin-All                 | not DE   | not DE   | not DE   | not DE  |
| EVM0010083 | LG4 | far upstream element-binding | not DE   | not DE   | not DE   | not DE  |
| EVM0000635 | LG4 | filament-like plant protein  | not DE   | not DE   | not DE   | not DE  |
| EVM0020628 | LG4 | filament-like plant protein- | not DE   | not DE   | not DE   | not DE  |
| EVM0020969 | LG4 | filament-like plant protein- | not DE   | not DE   | not DE   | not DE  |
| EVM0003081 | LG4 | flocculation protein FL011-l | 1.227859 | 0.018656 | not DE   | not DE  |
| EVM0014796 | LG4 | flowering-promoting factor l | not DE   | not DE   | not DE   | not DE  |
| EVM0001799 | LG4 | general transcription factor | not DE   | not DE   | not DE   | not DE  |
| EVM0002027 | LG4 | gibberellin-regulated protei | -1.93928 | 0.039984 | -1.82157 | 0.02575 |
| EVM0014057 | LG4 | glutamate receptor 3.3-like  | not DE   | not DE   | not DE   | not DE  |
| EVM0020837 | LG4 | glutamic acid-rich protein-l | not DE   | not DE   | not DE   | not DE  |
| EVM0016061 | LG4 | glyceraldehyde-3-phosphate d | -2.05212 | 0.024515 | not DE   | not DE  |
| EVM0019430 | LG4 | guanine nucleotide-binding p | not DE   | not DE   | not DE   | not DE  |
| EVM0020640 | LG4 | high mobility group B protei | not DE   | not DE   | not DE   | not DE  |
| EVM0008838 | LG4 | histone-lysine N-methyltrans | not DE   | not DE   | not DE   | not DE  |
| EVM0007731 | LG4 | histone-lysine N-methyltrans | not DE   | not DE   | not DE   | not DE  |
| EVM0004558 | LG4 | homogentisate phytyltransfer | not DE   | not DE   | not DE   | not DE  |
| EVM0002335 | LG4 | hydroquinone glucosyltransfe | not DE   | not DE   | not DE   | not DE  |
| EVM0009937 | LG4 | hydroquinone glucosyltransfe | not DE   | not DE   | not DE   | not DE  |
| EVM0002831 | LG4 | inactive protein kinase SELM | not DE   | not DE   | not DE   | not DE  |
| EVM0000274 | LG4 | inositol-pentakisphosphate 2 | -1.07669 | 0.000617 | not DE   | not DE  |
| EVM0010897 | LG4 | interferon-related developme | not DE   | not DE   | not DE   | not DE  |
| EVM0010445 | LG4 | isoamylase 3, chloroplastic- | not DE   | not DE   | not DE   | not DE  |
| EVM0024242 | LG4 | isoflavone reductase-like pr | not DE   | not DE   | not DE   | not DE  |
| EVM0009555 | LG4 | jasmonate O-methyltransferas | not DE   | not DE   | not DE   | not DE  |
| EVM0022799 | LG4 | keratin, type II cytoskeleta | not DE   | not DE   | not DE   | not DE  |
| EVM0014510 | LG4 | kinesin-like calmodulin-bind | not DE   | not DE   | not DE   | not DE  |
| EVM0019641 | LG4 | kinesin-like calmodulin-bind | not DE   | not DE   | not DE   | not DE  |
| EVM0019766 | LG4 | laccase-14-like              | not DE   | not DE   | not DE   | not DE  |
| EVM0004236 | LG4 | low affinity sulfate transpo | not DE   | not DE   | not DE   | not DE  |
| EVM0011277 | LG4 | low-temperature-induced cyst | not DE   | not DE   | not DE   | not DE  |



|            |     |                                     |          |          |          |         |
|------------|-----|-------------------------------------|----------|----------|----------|---------|
| EVM0020904 | LG4 | lysine histidine transporter        | not DE   | not DE   | not DE   | not DE  |
| EVM0011476 | LG4 | lysophospholipid acyltransferase    | not DE   | not DE   | not DE   | not DE  |
| EVM0002433 | LG4 | melanoma-associated antigen 1       | not DE   | not DE   | not DE   | not DE  |
| EVM0004321 | LG4 | melanoma-associated antigen 1       | not DE   | not DE   | not DE   | not DE  |
| EVM0008542 | LG4 | metal transporter Nramp2-like       | not DE   | not DE   | not DE   | not DE  |
| EVM0014518 | LG4 | metal transporter Nramp5-like       | not DE   | not DE   | not DE   | not DE  |
| EVM0014248 | LG4 | microtubule-associated protein 1    | not DE   | not DE   | not DE   | not DE  |
| EVM0024257 | LG4 | mitochondrial protein import        | not DE   | not DE   | not DE   | not DE  |
| EVM0006591 | LG4 | mitogen-activated protein kinase    | not DE   | not DE   | not DE   | not DE  |
| EVM0016122 | LG4 | mitotic spindle checkpoint protein  | not DE   | not DE   | 2.644022 | 0.02817 |
| EVM0008098 | LG4 | molybdopterin synthase sulfur       | not DE   | not DE   | not DE   | not DE  |
| EVM0017204 | LG4 | monoacylglycerol lipase ABHD1       | not DE   | not DE   | not DE   | not DE  |
| EVM0018271 | LG4 | monoacylglycerol lipase ABHD1       | not DE   | not DE   | not DE   | not DE  |
| EVM0001813 | LG4 | myosin-11-like                      | not DE   | not DE   | not DE   | not DE  |
| EVM0016107 | LG4 | myosin-11-like                      | not DE   | not DE   | not DE   | not DE  |
| EVM0023804 | LG4 | non-lysosomal glucosylceramidase    | not DE   | not DE   | not DE   | not DE  |
| EVM0002464 | LG4 | non-specific lipid-transfer protein | not DE   | not DE   | not DE   | not DE  |
| EVM0018763 | LG4 | nuA4 complex subunit EAF3 homolog   | not DE   | not DE   | not DE   | not DE  |
| EVM0018963 | LG4 | nuA4 complex subunit EAF3 homolog   | not DE   | not DE   | not DE   | not DE  |
| EVM0021726 | LG4 | oocyte element-binding factor 1     | not DE   | not DE   | not DE   | not DE  |
| EVM0014296 | LG4 | oligopeptide transporter 4-like     | not DE   | not DE   | not DE   | not DE  |
| EVM0024163 | LG4 | omega-hydroxypalmitate O-ferredoxin | not DE   | not DE   | not DE   | not DE  |
| EVM0008365 | LG4 | ornithine carbamoyltransferase      | not DE   | not DE   | not DE   | not DE  |
| EVM0001981 | LG4 | ornithine decarboxylase-like        | not DE   | not DE   | not DE   | not DE  |
| EVM0011069 | LG4 | ornithine decarboxylase-like        | not DE   | not DE   | not DE   | not DE  |
| EVM0001581 | LG4 | outer envelope pore protein         | not DE   | not DE   | not DE   | not DE  |
| EVM0017554 | LG4 | patatin-like protein 2              | not DE   | not DE   | not DE   | not DE  |
| EVM0014669 | LG4 | patellin-2-like                     | not DE   | not DE   | not DE   | not DE  |
| EVM0007721 | LG4 | pentatricopeptide repeat-containing | not DE   | not DE   | not DE   | not DE  |
| EVM0007877 | LG4 | pentatricopeptide repeat-containing | not DE   | not DE   | not DE   | not DE  |
| EVM0012301 | LG4 | pentatricopeptide repeat-containing | not DE   | not DE   | not DE   | not DE  |
| EVM0002270 | LG4 | pentatricopeptide repeat-containing | not DE   | not DE   | not DE   | not DE  |
| EVM0014284 | LG4 | pentatricopeptide repeat-containing | not DE   | not DE   | not DE   | not DE  |
| EVM0015122 | LG4 | pentatricopeptide repeat-containing | not DE   | not DE   | not DE   | not DE  |
| EVM0012341 | LG4 | pentatricopeptide repeat-containing | not DE   | not DE   | not DE   | not DE  |
| EVM0013239 | LG4 | pentatricopeptide repeat-containing | 2.135717 | 0.01947  | not DE   | not DE  |
| EVM0018854 | LG4 | pentatricopeptide repeat-containing | 1.605257 | 0.001147 | not DE   | not DE  |
| EVM0024211 | LG4 | pentatricopeptide repeat-containing | not DE   | not DE   | not DE   | not DE  |
| EVM0011475 | LG4 | pentatricopeptide repeat-containing | not DE   | not DE   | not DE   | not DE  |
| EVM0011633 | LG4 | pentatricopeptide repeat-containing | not DE   | not DE   | not DE   | not DE  |
| EVM0013948 | LG4 | pentatricopeptide repeat-containing | not DE   | not DE   | not DE   | not DE  |
| EVM0000414 | LG4 | pentatricopeptide repeat-containing | not DE   | not DE   | not DE   | not DE  |
| EVM0021104 | LG4 | pentatricopeptide repeat-containing | 1.707112 | 0.046892 | not DE   | not DE  |
| EVM0024563 | LG4 | pentatricopeptide repeat-containing | not DE   | not DE   | not DE   | not DE  |
| EVM0011012 | LG4 | pentatricopeptide repeat-containing | not DE   | not DE   | not DE   | not DE  |
| EVM0000005 | LG4 | pentatricopeptide repeat-containing | not DE   | not DE   | not DE   | not DE  |
| EVM0000785 | LG4 | periaxin-like                       | not DE   | not DE   | not DE   | not DE  |
| EVM0023935 | LG4 | periaxin-like                       | not DE   | not DE   | not DE   | not DE  |
| EVM0007389 | LG4 | peroxidase 64-like                  | not DE   | not DE   | not DE   | not DE  |
| EVM0021181 | LG4 | peroxidase 9                        | 2.507548 | 0.011407 | not DE   | not DE  |
| EVM0001513 | LG4 | pheophytinase, chloroplastic        | not DE   | not DE   | not DE   | not DE  |
| EVM0004436 | LG4 | phosphatidylglycerol phosphatase    | not DE   | not DE   | not DE   | not DE  |
| EVM0021151 | LG4 | phosphatidylinositol 4-phosphatase  | not DE   | not DE   | not DE   | not DE  |
| EVM0023864 | LG4 | phosphoenolpyruvate carboxykinase   | not DE   | not DE   | not DE   | not DE  |

|            |     |                                                           |          |          |          |         |
|------------|-----|-----------------------------------------------------------|----------|----------|----------|---------|
| EVM0007168 | LG4 | phospholipase DDHD2-like isoform                          | not DE   | not DE   | not DE   | not DE  |
| EVM0018638 | LG4 | phosphopantothenate--cysteine ligase                      | not DE   | not DE   | not DE   | not DE  |
| EVM0022622 | LG4 | phosphoprotein ECPP44                                     | not DE   | not DE   | not DE   | not DE  |
| EVM0003775 | LG4 | plastidial lipoyltransferase                              | not DE   | not DE   | not DE   | not DE  |
| EVM0013657 | LG4 | pleckstrin homology domain-containing protein             | not DE   | not DE   | not DE   | not DE  |
| EVM0008778 | LG4 | polyadenylate-binding protein                             | not DE   | not DE   | not DE   | not DE  |
| EVM0013621 | LG4 | polypyrimidine tract-binding protein                      | not DE   | not DE   | not DE   | not DE  |
| EVM0000470 | LG4 | pre-rRNA-processing protein                               | not DE   | not DE   | not DE   | not DE  |
| EVM0010278 | LG4 | probable 26S proteasome non-ATPase subunit                | not DE   | not DE   | not DE   | not DE  |
| EVM0004303 | LG4 | probable E3 ubiquitin-protein ligase                      | not DE   | not DE   | not DE   | not DE  |
| EVM0019767 | LG4 | probable E3 ubiquitin-protein ligase                      | not DE   | not DE   | not DE   | not DE  |
| EVM0024296 | LG4 | probable F-actin-capping protein                          | not DE   | not DE   | 1.11801  | 0.00311 |
| EVM0000312 | LG4 | probable L-type lectin-domain-containing protein          | not DE   | not DE   | not DE   | not DE  |
| EVM0009247 | LG4 | probable MYST-like histone acetyltransferase              | not DE   | not DE   | not DE   | not DE  |
| EVM0008449 | LG4 | probable VAMP-like protein A                              | not DE   | not DE   | not DE   | not DE  |
| EVM0013326 | LG4 | probable WRKY transcription factor                        | 1.587748 | 0.022792 | not DE   | not DE  |
| EVM0014850 | LG4 | probable acyl-activating enzyme                           | not DE   | not DE   | not DE   | not DE  |
| EVM0014778 | LG4 | probable alpha-amylase 2-like                             | not DE   | not DE   | not DE   | not DE  |
| EVM0003839 | LG4 | probable carbohydrate esterase                            | not DE   | not DE   | not DE   | not DE  |
| EVM0009531 | LG4 | probable carbohydrate esterase                            | not DE   | not DE   | not DE   | not DE  |
| EVM0016208 | LG4 | probable carboxylesterase 18                              | not DE   | not DE   | not DE   | not DE  |
| EVM0016974 | LG4 | probable carboxylesterase 18                              | not DE   | not DE   | not DE   | not DE  |
| EVM0018554 | LG4 | probable carboxylesterase 18                              | not DE   | not DE   | not DE   | not DE  |
| EVM0020543 | LG4 | probable carboxylesterase 18                              | not DE   | not DE   | not DE   | not DE  |
| EVM0022750 | LG4 | probable carboxylesterase 18                              | not DE   | not DE   | not DE   | not DE  |
| EVM0005774 | LG4 | probable diphthine synthase                               | not DE   | not DE   | not DE   | not DE  |
| EVM0002310 | LG4 | probable disease resistance protein                       | not DE   | not DE   | not DE   | not DE  |
| EVM0000136 | LG4 | probable helicase MAGATAMA 3                              | not DE   | not DE   | not DE   | not DE  |
| EVM0021059 | LG4 | probable inactive tRNA-specific aminoacyl-tRNA synthetase | not DE   | not DE   | not DE   | not DE  |
| EVM0003297 | LG4 | probable indole-3-pyruvate methyltransferase              | not DE   | not DE   | not DE   | not DE  |
| EVM0013342 | LG4 | probable methyltransferase F                              | not DE   | not DE   | not DE   | not DE  |
| EVM0004169 | LG4 | probable pectin methyltransferase                         | not DE   | not DE   | not DE   | not DE  |
| EVM0010365 | LG4 | probable peptide/nitrate transporter                      | not DE   | not DE   | not DE   | not DE  |
| EVM0010373 | LG4 | probable peptide/nitrate transporter                      | not DE   | not DE   | not DE   | not DE  |
| EVM0020335 | LG4 | probable receptor-like protein                            | not DE   | not DE   | not DE   | not DE  |
| EVM0021652 | LG4 | probable receptor-like serine/threonine kinase            | not DE   | not DE   | not DE   | not DE  |
| EVM0000222 | LG4 | probable serine/threonine-protein kinase                  | not DE   | not DE   | not DE   | not DE  |
| EVM0010872 | LG4 | probable serine/threonine-protein kinase                  | not DE   | not DE   | not DE   | not DE  |
| EVM0010622 | LG4 | probable strigolactone esterase                           | not DE   | not DE   | -1.36661 | 0.00017 |
| EVM0000077 | LG4 | probable sucrose-phosphate synthase                       | 2.088698 | 0.001489 | 1.24865  | 0.00289 |
| EVM0004780 | LG4 | probable tRNA modification enzyme                         | not DE   | not DE   | not DE   | not DE  |
| EVM0023164 | LG4 | probable thylakoidal process                              | not DE   | not DE   | not DE   | not DE  |
| EVM0020542 | LG4 | probable transcription factor                             | not DE   | not DE   | not DE   | not DE  |
| EVM0007776 | LG4 | probable trehalose-phosphate synthase                     | not DE   | not DE   | not DE   | not DE  |
| EVM0013191 | LG4 | probable trehalose-phosphate synthase                     | not DE   | not DE   | not DE   | not DE  |
| EVM0017953 | LG4 | proline-rich receptor-like protein                        | not DE   | not DE   | not DE   | not DE  |
| EVM0016423 | LG4 | proline-rich receptor-like protein                        | not DE   | not DE   | not DE   | not DE  |
| EVM0007361 | LG4 | protein ASPARTIC PROTEASE INHIBITOR                       | not DE   | not DE   | not DE   | not DE  |
| EVM0000803 | LG4 | protein BRASSINAZOLE-RESISTANCE 1                         | not DE   | not DE   | not DE   | not DE  |
| EVM0014909 | LG4 | protein BRASSINAZOLE-RESISTANCE 1                         | not DE   | not DE   | not DE   | not DE  |
| EVM0008140 | LG4 | protein ECERIFERUM 1-like                                 | not DE   | not DE   | not DE   | not DE  |
| EVM0000049 | LG4 | protein FAM135B-like                                      | not DE   | not DE   | not DE   | not DE  |
| EVM0023845 | LG4 | protein FAM188A-like                                      | not DE   | not DE   | not DE   | not DE  |
| EVM0020357 | LG4 | protein FAM206A-like isoform                              | 1.207199 | 0.009229 | not DE   | not DE  |

|            |     |                               |          |          |        |        |
|------------|-----|-------------------------------|----------|----------|--------|--------|
| EVM0003884 | LG4 | protein FAM91A1-like          | not DE   | not DE   | not DE | not DE |
| EVM0024445 | LG4 | protein FAR1-RELATED SEQUENC  | not DE   | not DE   | not DE | not DE |
| EVM0006549 | LG4 | protein IDA-LIKE 4-like       | not DE   | not DE   | not DE | not DE |
| EVM0010240 | LG4 | protein IDA-LIKE 4-like       | not DE   | not DE   | not DE | not DE |
| EVM0013560 | LG4 | protein IQ-DOMAIN 32-like     | not DE   | not DE   | not DE | not DE |
| EVM0008689 | LG4 | protein MITOFERRINLIKE 1, ch  | not DE   | not DE   | not DE | not DE |
| EVM0016392 | LG4 | protein MITOFERRINLIKE 1, ch  | not DE   | not DE   | not DE | not DE |
| EVM0005562 | LG4 | protein NRT1/ PTR FAMILY 8.2  | not DE   | not DE   | not DE | not DE |
| EVM0011235 | LG4 | protein OSB1, mitochondrial-  | not DE   | not DE   | not DE | not DE |
| EVM0003822 | LG4 | protein RADIALIS-like 6-like  | not DE   | not DE   | not DE | not DE |
| EVM0000847 | LG4 | protein RALF-like 9-like      | not DE   | not DE   | not DE | not DE |
| EVM0001532 | LG4 | protein RALF-like 9-like      | not DE   | not DE   | not DE | not DE |
| EVM0003788 | LG4 | protein RALF-like 9-like      | not DE   | not DE   | not DE | not DE |
| EVM0011065 | LG4 | protein RALF-like 9-like      | not DE   | not DE   | not DE | not DE |
| EVM0013585 | LG4 | protein RALF-like 9-like      | not DE   | not DE   | not DE | not DE |
| EVM0013861 | LG4 | protein RALF-like 9-like      | not DE   | not DE   | not DE | not DE |
| EVM0016412 | LG4 | protein RALF-like 9-like      | not DE   | not DE   | not DE | not DE |
| EVM0004443 | LG4 | protein RER1B-like            | not DE   | not DE   | not DE | not DE |
| EVM0001587 | LG4 | protein ROOT INITIATION DEFE  | 1.388895 | 0.041451 | not DE | not DE |
| EVM0019117 | LG4 | protein ROOT INITIATION DEFE  | not DE   | not DE   | not DE | not DE |
| EVM0005813 | LG4 | protein ROOT PRIMORDIUM DEFE  | not DE   | not DE   | not DE | not DE |
| EVM0001011 | LG4 | protein S-acyltransferase 21  | not DE   | not DE   | not DE | not DE |
| EVM0017353 | LG4 | protein SET DOMAIN GROUP 41-  | not DE   | not DE   | not DE | not DE |
| EVM0011578 | LG4 | protein STICHEL-like 3        | 2.40706  | 0.001664 | not DE | not DE |
| EVM0021319 | LG4 | protein SUPPRESSOR OF npr1-l  | not DE   | not DE   | not DE | not DE |
| EVM0005282 | LG4 | protein TIC 20-I, chloroplas  | not DE   | not DE   | not DE | not DE |
| EVM0024366 | LG4 | protein WEAK CHLOROPLAST MOV  | not DE   | not DE   | not DE | not DE |
| EVM0009111 | LG4 | protein YLS7-like isoform X1  | not DE   | not DE   | not DE | not DE |
| EVM0000468 | LG4 | protein canopy-1              | not DE   | not DE   | not DE | not DE |
| EVM0006690 | LG4 | protein disulfide-isomerase   | not DE   | not DE   | not DE | not DE |
| EVM0005441 | LG4 | protein disulfide-isomerase-  | not DE   | not DE   | not DE | not DE |
| EVM0009285 | LG4 | protein disulfide-isomerase-  | not DE   | not DE   | not DE | not DE |
| EVM0021832 | LG4 | protein enabled homolog       | not DE   | not DE   | not DE | not DE |
| EVM0008723 | LG4 | protein translocase subunit   | not DE   | not DE   | not DE | not DE |
| EVM0023369 | LG4 | protein-tyrosine-phosphatase  | not DE   | not DE   | not DE | not DE |
| EVM0009471 | LG4 | putative B3 domain-containin  | not DE   | not DE   | not DE | not DE |
| EVM0005675 | LG4 | putative DNA-binding protein  | not DE   | not DE   | not DE | not DE |
| EVM0015003 | LG4 | putative DNA-binding protein  | not DE   | not DE   | not DE | not DE |
| EVM0002487 | LG4 | putative E3 ubiquitin-protein | not DE   | not DE   | not DE | not DE |
| EVM0014817 | LG4 | putative GTP-binding protein  | not DE   | not DE   | not DE | not DE |
| EVM0010524 | LG4 | putative disease resistance   | not DE   | not DE   | not DE | not DE |
| EVM0005421 | LG4 | putative germin-like protein  | not DE   | not DE   | not DE | not DE |
| EVM0018647 | LG4 | putative invertase inhibitor  | not DE   | not DE   | not DE | not DE |
| EVM0015408 | LG4 | putative methylesterase 14,   | not DE   | not DE   | not DE | not DE |
| EVM0016624 | LG4 | putative methyltransferase A  | not DE   | not DE   | not DE | not DE |
| EVM0002877 | LG4 | putative pentatricopeptide r  | not DE   | not DE   | not DE | not DE |
| EVM0017873 | LG4 | putative pentatricopeptide r  | not DE   | not DE   | not DE | not DE |
| EVM0005425 | LG4 | putative pumilio homolog 7,   | not DE   | not DE   | not DE | not DE |
| EVM0004421 | LG4 | putative receptor protein kin | not DE   | not DE   | not DE | not DE |
| EVM0017447 | LG4 | putative receptor protein kin | not DE   | not DE   | not DE | not DE |
| EVM0006096 | LG4 | putative wall-associated rec  | not DE   | not DE   | not DE | not DE |
| EVM0023320 | LG4 | queuine tRNA-ribosyltransfer  | not DE   | not DE   | not DE | not DE |
| EVM0018207 | LG4 | queuine tRNA-ribosyltransfer  | not DE   | not DE   | not DE | not DE |
| EVM0019102 | LG4 | rac-like GTP-binding protein  | not DE   | not DE   | not DE | not DE |

|            |     |                               |          |          |          |         |
|------------|-----|-------------------------------|----------|----------|----------|---------|
| EVM0006873 | LG4 | receptor protein kinase CLAV  | not DE   | not DE   | not DE   | not DE  |
| EVM0012680 | LG4 | receptor protein kinase CLAV  | not DE   | not DE   | not DE   | not DE  |
| EVM0019835 | LG4 | receptor protein kinase CLAV  | not DE   | not DE   | not DE   | not DE  |
| EVM0003033 | LG4 | receptor-like protein kinase  | not DE   | not DE   | not DE   | not DE  |
| EVM0009896 | LG4 | receptor-like protein kinase  | not DE   | not DE   | not DE   | not DE  |
| EVM0011693 | LG4 | receptor-like protein kinase  | not DE   | not DE   | not DE   | not DE  |
| EVM0015499 | LG4 | receptor-like protein kinase  | not DE   | not DE   | not DE   | not DE  |
| EVM0004901 | LG4 | receptor-like serine/threoni  | 2.056189 | 0.027409 | not DE   | not DE  |
| EVM0006275 | LG4 | replication factor C subunit  | not DE   | not DE   | not DE   | not DE  |
| EVM0022530 | LG4 | replication factor C subunit  | not DE   | not DE   | not DE   | not DE  |
| EVM0012860 | LG4 | replication factor C subunit  | not DE   | not DE   | not DE   | not DE  |
| EVM0000861 | LG4 | reticuline oxidase-like       | -1.31569 | 0.023697 | not DE   | not DE  |
| EVM0013813 | LG4 | rhamnogalacturonate lyase B-  | not DE   | not DE   | not DE   | not DE  |
| EVM0006155 | LG4 | rhamnogalacturonate lyase B-  | -1.81093 | 5.03E-05 | not DE   | not DE  |
| EVM0023718 | LG4 | rhamnogalacturonate lyase B-  | not DE   | not DE   | not DE   | not DE  |
| EVM0017803 | LG4 | rho GTPase-activating protei  | not DE   | not DE   | not DE   | not DE  |
| EVM0021627 | LG4 | ribosome maturation protein   | not DE   | not DE   | not DE   | not DE  |
| EVM0013610 | LG4 | salicylate carboxymethyltran  | not DE   | not DE   | not DE   | not DE  |
| EVM0006242 | LG4 | scarecrow-like protein 1-like | not DE   | not DE   | not DE   | not DE  |
| EVM0002533 | LG4 | scopoletin glucosyltransfera  | 2.346913 | 0.008826 | not DE   | not DE  |
| EVM0008581 | LG4 | scopoletin glucosyltransfera  | not DE   | not DE   | not DE   | not DE  |
| EVM0011271 | LG4 | serine carboxypeptidase-like  | not DE   | not DE   | not DE   | not DE  |
| EVM0019619 | LG4 | serine hydroxymethyltransfer  | not DE   | not DE   | not DE   | not DE  |
| EVM0024407 | LG4 | serine/arginine-rich splicing | not DE   | not DE   | not DE   | not DE  |
| EVM0017541 | LG4 | serine/threonine-protein kin  | not DE   | not DE   | not DE   | not DE  |
| EVM0018935 | LG4 | serine/threonine-protein kin  | -2.43862 | 0.00852  | not DE   | not DE  |
| EVM0013493 | LG4 | serine/threonine-protein kin  | not DE   | not DE   | -1.29638 | 0.00735 |
| EVM0009646 | LG4 | serpin-ZX-like                | not DE   | not DE   | not DE   | not DE  |
| EVM0024049 | LG4 | shikimate kinase 2, chloropl  | not DE   | not DE   | not DE   | not DE  |
| EVM0024225 | LG4 | short-chain dehydrogenase/re  | not DE   | not DE   | not DE   | not DE  |
| EVM0001703 | LG4 | single-stranded DNA-binding   | not DE   | not DE   | not DE   | not DE  |
| EVM0008047 | LG4 | sister chromatid cohesion pr  | not DE   | not DE   | not DE   | not DE  |
| EVM0006328 | LG4 | snakin-1-like                 | -1.62011 | 0.016801 | not DE   | not DE  |
| EVM0018998 | LG4 | spindle assembly checkpoint   | not DE   | not DE   | 1.084949 | 0.014   |
| EVM0022215 | LG4 | splicing factor U2af small s  | -1.63273 | 2.88E-07 | not DE   | not DE  |
| EVM0008537 | LG4 | squamosa promoter-binding-li  | not DE   | not DE   | not DE   | not DE  |
| EVM0000046 | LG4 | sterol 3-beta-glucosyltransf  | not DE   | not DE   | not DE   | not DE  |
| EVM0020014 | LG4 | subtilisin-like protease-like | not DE   | not DE   | not DE   | not DE  |
| EVM0001033 | LG4 | sucrose transport protein SU  | not DE   | not DE   | not DE   | not DE  |
| EVM0009617 | LG4 | sucrose transport protein SU  | not DE   | not DE   | not DE   | not DE  |
| EVM0011509 | LG4 | symplekin-like isoform X1     | not DE   | not DE   | not DE   | not DE  |
| EVM0000909 | LG4 | synaptonemal complex protei   | not DE   | not DE   | not DE   | not DE  |
| EVM0000381 | LG4 | synaptotagmin-2               | not DE   | not DE   | not DE   | not DE  |
| EVM0011333 | LG4 | tRNA (adenine(58)-N(1))-meth  | not DE   | not DE   | not DE   | not DE  |
| EVM0022843 | LG4 | target of Myb protein 1-like  | not DE   | not DE   | not DE   | not DE  |
| EVM0012511 | LG4 | tetraspanin-10 isoform X1     | not DE   | not DE   | not DE   | not DE  |
| EVM0007457 | LG4 | tetratricopeptide repeat pro  | not DE   | not DE   | not DE   | not DE  |
| EVM0014849 | LG4 | tetratricopeptide repeat pro  | not DE   | not DE   | not DE   | not DE  |
| EVM0018363 | LG4 | tetratricopeptide repeat pro  | 1.392798 | 0.027733 | not DE   | not DE  |
| EVM0008461 | LG4 | thaumatin-like protein 1-like | not DE   | not DE   | not DE   | not DE  |
| EVM0015060 | LG4 | thioredoxin H-type-like       | 1.3052   | 0.04953  | 1.427952 | 0.00197 |
| EVM0016200 | LG4 | thioredoxin H-type-like       | not DE   | not DE   | not DE   | not DE  |
| EVM0017094 | LG4 | thioredoxin M-type, chloropl  | not DE   | not DE   | not DE   | not DE  |
| EVM0012851 | LG4 | threonylcarbamoyladenosi      | not DE   | not DE   | not DE   | not DE  |

|            |     |                              |          |          |          |         |
|------------|-----|------------------------------|----------|----------|----------|---------|
| EVM0004879 | LG4 | transcription factor E2FC-li | not DE   | not DE   | not DE   | not DE  |
| EVM0020786 | LG4 | transcription factor HEC1    | not DE   | not DE   | not DE   | not DE  |
| EVM0010647 | LG4 | transcription factor LHW-lik | -2.99077 | 0.024415 | not DE   | not DE  |
| EVM0024537 | LG4 | transcription factor MYB39-1 | not DE   | not DE   | not DE   | not DE  |
| EVM0006170 | LG4 | transcription factor MYB86-1 | not DE   | not DE   | not DE   | not DE  |
| EVM0024231 | LG4 | transcription factor RLM1-li | not DE   | not DE   | not DE   | not DE  |
| EVM0015371 | LG4 | transcription factor SPATULA | not DE   | not DE   | not DE   | not DE  |
| EVM0021951 | LG4 | transcription factor bHLH143 | not DE   | not DE   | not DE   | not DE  |
| EVM0010087 | LG4 | transcription factor bHLH96- | not DE   | not DE   | not DE   | not DE  |
| EVM0011546 | LG4 | transcription factor bHLH96- | not DE   | not DE   | not DE   | not DE  |
| EVM0002659 | LG4 | transcription initiation fac | not DE   | not DE   | not DE   | not DE  |
| EVM0024277 | LG4 | transcriptional regulator AT | not DE   | not DE   | not DE   | not DE  |
| EVM0006919 | LG4 | transmembrane protein 136    | not DE   | not DE   | not DE   | not DE  |
| EVM0000672 | LG4 | transmembrane protein 147-li | not DE   | not DE   | not DE   | not DE  |
| EVM0000232 | LG4 | transmembrane protein 18-lik | not DE   | not DE   | not DE   | not DE  |
| EVM0003510 | LG4 | transmembrane protein 50 hom | not DE   | not DE   | not DE   | not DE  |
| EVM0018906 | LG4 | transport inhibitor response | not DE   | not DE   | not DE   | not DE  |
| EVM0009703 | LG4 | transposon Ty3-G Gag-Pol pol | not DE   | not DE   | not DE   | not DE  |
| EVM0004726 | LG4 | tubby-like F-box protein 8-l | not DE   | not DE   | not DE   | not DE  |
| EVM0012638 | LG4 | tubulin beta-6 chain-like    | not DE   | not DE   | not DE   | not DE  |
| EVM0019907 | LG4 | type 1 phosphatases regulato | not DE   | not DE   | not DE   | not DE  |
| EVM0018226 | LG4 | type I inositol 1,4,5-trisph | not DE   | not DE   | not DE   | not DE  |
| EVM0002679 | LG4 | type I inositol 1,4,5-trisph | not DE   | not DE   | not DE   | not DE  |
| EVM0010093 | LG4 | type I inositol 1,4,5-trisph | not DE   | not DE   | not DE   | not DE  |
| EVM0001435 | LG4 | ubiquitin-fold modifier-conj | not DE   | not DE   | not DE   | not DE  |
| EVM0016171 | LG4 | uncharacterized J domain-con | not DE   | not DE   | not DE   | not DE  |
| EVM0019036 | LG4 | uncharacterized TPR repeat-c | not DE   | not DE   | not DE   | not DE  |
| EVM0008958 | LG4 | uncharacterized aarF domain- | not DE   | not DE   | not DE   | not DE  |
| EVM0019475 | LG4 | uncharacterized acetyltransf | not DE   | not DE   | not DE   | not DE  |
| EVM0004506 | LG4 | uncharacterized membrane pro | not DE   | not DE   | not DE   | not DE  |
| EVM0004163 | LG4 | uncharacterized methyltransf | -3.41004 | 1.76E-05 | not DE   | not DE  |
| EVM0006121 | LG4 | uncharacterized methyltransf | 1.36479  | 8.03E-06 | not DE   | not DE  |
| EVM0004651 | LG4 | uncharacterized protein Atlg | not DE   | not DE   | not DE   | not DE  |
| EVM0015076 | LG4 | uncharacterized protein Atlg | not DE   | not DE   | not DE   | not DE  |
| EVM0007257 | LG4 | uncharacterized protein Atlg | -3.46447 | 0.030201 | not DE   | not DE  |
| EVM0017344 | LG4 | uncharacterized protein Atlg | not DE   | not DE   | not DE   | not DE  |
| EVM0004457 | LG4 | uncharacterized protein At2g | -1.44278 | 0.000312 | not DE   | not DE  |
| EVM0012403 | LG4 | uncharacterized protein At3g | not DE   | not DE   | not DE   | not DE  |
| EVM0014800 | LG4 | uncharacterized protein At4g | not DE   | not DE   | not DE   | not DE  |
| EVM0009970 | LG4 | uncharacterized protein At5g | not DE   | not DE   | not DE   | not DE  |
| EVM0010814 | LG4 | uncharacterized protein C6C3 | not DE   | not DE   | not DE   | not DE  |
| EVM0007012 | LG4 | uncharacterized protein C6G9 | not DE   | not DE   | not DE   | not DE  |
| EVM0008069 | LG4 | uncharacterized protein KIAA | not DE   | not DE   | not DE   | not DE  |
| EVM0017550 | LG4 | uncharacterized protein LOC1 | not DE   | not DE   | not DE   | not DE  |
| EVM0014234 | LG4 | uncharacterized protein LOC1 | not DE   | not DE   | not DE   | not DE  |
| EVM0003725 | LG4 | uncharacterized protein LOC1 | not DE   | not DE   | not DE   | not DE  |
| EVM0007359 | LG4 | uncharacterized protein LOC1 | not DE   | not DE   | not DE   | not DE  |
| EVM0004805 | LG4 | uncharacterized protein LOC1 | not DE   | not DE   | not DE   | not DE  |
| EVM0023315 | LG4 | uncharacterized protein LOC1 | not DE   | not DE   | not DE   | not DE  |
| EVM0000337 | LG4 | uncharacterized protein LOC1 | not DE   | not DE   | not DE   | not DE  |
| EVM0009867 | LG4 | uncharacterized protein LOC1 | not DE   | not DE   | not DE   | not DE  |
| EVM0011270 | LG4 | uncharacterized protein LOC1 | not DE   | not DE   | 1.263977 | 0.02363 |
| EVM0020808 | LG4 | uncharacterized protein LOC1 | not DE   | not DE   | not DE   | not DE  |
| EVM0017176 | LG4 | uncharacterized protein LOC1 | not DE   | not DE   | not DE   | not DE  |

|            |     |                              |          |          |          |         |
|------------|-----|------------------------------|----------|----------|----------|---------|
| EVM0023502 | LG4 | uncharacterized protein LOC1 | not DE   | not DE   | not DE   | not DE  |
| EVM0002750 | LG4 | uncharacterized protein LOC1 | not DE   | not DE   | not DE   | not DE  |
| EVM0005696 | LG4 | uncharacterized protein LOC1 | not DE   | not DE   | not DE   | not DE  |
| EVM0011554 | LG4 | uncharacterized protein LOC1 | not DE   | not DE   | -2.83565 | 0.01486 |
| EVM0005467 | LG4 | uncharacterized protein LOC1 | not DE   | not DE   | not DE   | not DE  |
| EVM0006294 | LG4 | uncharacterized protein LOC1 | not DE   | not DE   | not DE   | not DE  |
| EVM0005363 | LG4 | uncharacterized protein LOC1 | not DE   | not DE   | not DE   | not DE  |
| EVM0005678 | LG4 | uncharacterized protein LOC1 | not DE   | not DE   | not DE   | not DE  |
| EVM0012842 | LG4 | uncharacterized protein LOC1 | not DE   | not DE   | not DE   | not DE  |
| EVM0005689 | LG4 | uncharacterized protein LOC1 | not DE   | not DE   | not DE   | not DE  |
| EVM0018316 | LG4 | uncharacterized protein LOC1 | 2.792323 | 0.001612 | not DE   | not DE  |
| EVM0003594 | LG4 | uncharacterized protein LOC1 | not DE   | not DE   | not DE   | not DE  |
| EVM0008193 | LG4 | uncharacterized protein LOC1 | not DE   | not DE   | not DE   | not DE  |
| EVM0000527 | LG4 | uncharacterized protein LOC1 | not DE   | not DE   | not DE   | not DE  |
| EVM0001518 | LG4 | uncharacterized protein LOC1 | not DE   | not DE   | not DE   | not DE  |
| EVM0014478 | LG4 | uncharacterized protein LOC1 | not DE   | not DE   | not DE   | not DE  |
| EVM0016969 | LG4 | uncharacterized protein LOC1 | not DE   | not DE   | not DE   | not DE  |
| EVM0001247 | LG4 | uncharacterized protein LOC1 | not DE   | not DE   | not DE   | not DE  |
| EVM0003340 | LG4 | uncharacterized protein LOC1 | not DE   | not DE   | not DE   | not DE  |
| EVM0008485 | LG4 | uncharacterized protein LOC1 | not DE   | not DE   | not DE   | not DE  |
| EVM0000983 | LG4 | uncharacterized protein LOC1 | not DE   | not DE   | not DE   | not DE  |
| EVM0021778 | LG4 | uncharacterized protein LOC1 | not DE   | not DE   | not DE   | not DE  |
| EVM0021879 | LG4 | uncharacterized protein LOC1 | not DE   | not DE   | not DE   | not DE  |
| EVM0011919 | LG4 | uncharacterized protein LOC1 | not DE   | not DE   | not DE   | not DE  |
| EVM0023658 | LG4 | uncharacterized protein LOC1 | not DE   | not DE   | not DE   | not DE  |
| EVM0011753 | LG4 | uncharacterized protein LOC1 | not DE   | not DE   | not DE   | not DE  |
| EVM0002283 | LG4 | uncharacterized protein LOC1 | not DE   | not DE   | not DE   | not DE  |
| EVM0007482 | LG4 | uncharacterized protein LOC1 | not DE   | not DE   | not DE   | not DE  |
| EVM0011660 | LG4 | uncharacterized protein LOC1 | not DE   | not DE   | not DE   | not DE  |
| EVM0023686 | LG4 | uncharacterized protein LOC1 | not DE   | not DE   | not DE   | not DE  |
| EVM0009869 | LG4 | uncharacterized protein LOC1 | not DE   | not DE   | 1.421814 | 0.00311 |
| EVM0016174 | LG4 | uncharacterized protein LOC1 | 3.958807 | 1.14E-05 | not DE   | not DE  |
| EVM0014272 | LG4 | uncharacterized protein LOC1 | not DE   | not DE   | not DE   | not DE  |
| EVM0007969 | LG4 | uncharacterized protein LOC1 | not DE   | not DE   | not DE   | not DE  |
| EVM0018411 | LG4 | uncharacterized protein LOC1 | not DE   | not DE   | not DE   | not DE  |
| EVM0000877 | LG4 | uncharacterized protein LOC1 | not DE   | not DE   | not DE   | not DE  |
| EVM0019693 | LG4 | uncharacterized protein LOC1 | not DE   | not DE   | not DE   | not DE  |
| EVM0014785 | LG4 | uncharacterized protein LOC1 | not DE   | not DE   | not DE   | not DE  |
| EVM0003522 | LG4 | uncharacterized protein LOC1 | not DE   | not DE   | not DE   | not DE  |
| EVM0002550 | LG4 | uncharacterized protein LOC1 | not DE   | not DE   | not DE   | not DE  |
| EVM0020300 | LG4 | uncharacterized protein LOC1 | not DE   | not DE   | not DE   | not DE  |
| EVM0019679 | LG4 | uncharacterized protein LOC1 | not DE   | not DE   | not DE   | not DE  |
| EVM0006769 | LG4 | uncharacterized protein LOC1 | not DE   | not DE   | not DE   | not DE  |
| EVM0017086 | LG4 | uncharacterized protein LOC1 | not DE   | not DE   | not DE   | not DE  |
| EVM0010991 | LG4 | uncharacterized protein LOC1 | not DE   | not DE   | not DE   | not DE  |
| EVM0009276 | LG4 | uncharacterized protein LOC1 | not DE   | not DE   | not DE   | not DE  |
| EVM0015446 | LG4 | uncharacterized protein LOC1 | not DE   | not DE   | not DE   | not DE  |
| EVM0000462 | LG4 | uncharacterized protein LOC1 | not DE   | not DE   | not DE   | not DE  |
| EVM0014706 | LG4 | uncharacterized protein LOC1 | not DE   | not DE   | not DE   | not DE  |
| EVM0018309 | LG4 | uncharacterized protein LOC1 | not DE   | not DE   | not DE   | not DE  |
| EVM0005861 | LG4 | uncharacterized protein LOC1 | not DE   | not DE   | not DE   | not DE  |
| EVM0004424 | LG4 | uncharacterized protein LOC1 | not DE   | not DE   | not DE   | not DE  |
| EVM0013076 | LG4 | uncharacterized protein LOC1 | not DE   | not DE   | not DE   | not DE  |
| EVM0011130 | LG4 | uncharacterized protein LOC1 | not DE   | not DE   | not DE   | not DE  |

|            |     |                               |          |          |          |         |
|------------|-----|-------------------------------|----------|----------|----------|---------|
| EVM0014505 | LG4 | uncharacterized protein LOC1  | not DE   | not DE   | not DE   | not DE  |
| EVM0000586 | LG4 | uncharacterized protein LOC1  | not DE   | not DE   | not DE   | not DE  |
| EVM0015563 | LG4 | uncharacterized protein LOC1  | not DE   | not DE   | not DE   | not DE  |
| EVM0023394 | LG4 | uncharacterized protein LOC1  | not DE   | not DE   | not DE   | not DE  |
| EVM0004862 | LG4 | uncharacterized protein LOC1  | not DE   | not DE   | not DE   | not DE  |
| EVM0017754 | LG4 | uncharacterized protein LOC1  | not DE   | not DE   | -1.00461 | 0.03789 |
| EVM0016913 | LG4 | uncharacterized protein LOC1  | 1.226568 | 0.014033 | 1.611485 | 0.0011  |
| EVM0015896 | LG4 | uncharacterized protein LOC1  | not DE   | not DE   | not DE   | not DE  |
| EVM0004538 | LG4 | uncharacterized protein LOC1  | not DE   | not DE   | not DE   | not DE  |
| EVM0005037 | LG4 | uncharacterized protein LOC1  | not DE   | not DE   | 1.9871   | 0.02163 |
| EVM0006091 | LG4 | uncharacterized protein LOC1  | not DE   | not DE   | not DE   | not DE  |
| EVM0022313 | LG4 | uncharacterized protein LOC1  | not DE   | not DE   | -1.27087 | #####   |
| EVM0014159 | LG4 | uncharacterized protein LOC1  | not DE   | not DE   | not DE   | not DE  |
| EVM0022652 | LG4 | uncharacterized protein LOC1  | not DE   | not DE   | not DE   | not DE  |
| EVM0022724 | LG4 | uncharacterized protein LOC1  | not DE   | not DE   | not DE   | not DE  |
| EVM0004101 | LG4 | uncharacterized protein LOC1  | not DE   | not DE   | not DE   | not DE  |
| EVM0001786 | LG4 | uncharacterized protein LOC1  | not DE   | not DE   | not DE   | not DE  |
| EVM0015740 | LG4 | uncharacterized protein LOC1  | not DE   | not DE   | not DE   | not DE  |
| EVM0008733 | LG4 | uncharacterized protein LOC1  | not DE   | not DE   | not DE   | not DE  |
| EVM0017792 | LG4 | uncharacterized protein LOC1  | not DE   | not DE   | 1.268103 | #####   |
| EVM0016598 | LG4 | uncharacterized protein LOC1  | not DE   | not DE   | not DE   | not DE  |
| EVM0010585 | LG4 | uncharacterized protein LOC1  | not DE   | not DE   | not DE   | not DE  |
| EVM0022439 | LG4 | uncharacterized protein LOC1  | not DE   | not DE   | not DE   | not DE  |
| EVM0004067 | LG4 | uncharacterized protein LOC1  | not DE   | not DE   | not DE   | not DE  |
| EVM0014734 | LG4 | uncharacterized protein LOC1  | not DE   | not DE   | not DE   | not DE  |
| EVM0019090 | LG4 | uncharacterized protein LOC1  | not DE   | not DE   | not DE   | not DE  |
| EVM0023335 | LG4 | uncharacterized protein LOC1  | not DE   | not DE   | not DE   | not DE  |
| EVM0004121 | LG4 | uncharacterized protein LOC1  | not DE   | not DE   | not DE   | not DE  |
| EVM0009372 | LG4 | uncharacterized protein LOC1  | not DE   | not DE   | not DE   | not DE  |
| EVM0013977 | LG4 | uncharacterized protein LOC1  | not DE   | not DE   | not DE   | not DE  |
| EVM0014460 | LG4 | uncharacterized protein LOC1  | not DE   | not DE   | not DE   | not DE  |
| EVM0003318 | LG4 | uncharacterized protein LOC1  | not DE   | not DE   | not DE   | not DE  |
| EVM0007902 | LG4 | uncharacterized protein LOC1  | not DE   | not DE   | not DE   | not DE  |
| EVM0005734 | LG4 | uncharacterized protein LOC1  | not DE   | not DE   | not DE   | not DE  |
| EVM0013481 | LG4 | uncharacterized protein LOC1  | not DE   | not DE   | not DE   | not DE  |
| EVM0010867 | LG4 | uncharacterized protein LOC1  | not DE   | not DE   | not DE   | not DE  |
| EVM0020903 | LG4 | uncharacterized protein LOC1  | not DE   | not DE   | not DE   | not DE  |
| EVM0017321 | LG4 | uncharacterized protein LOC1  | not DE   | not DE   | not DE   | not DE  |
| EVM0000633 | LG4 | uncharacterized protein LOC1  | not DE   | not DE   | not DE   | not DE  |
| EVM0014263 | LG4 | uncharacterized protein LOC1  | not DE   | not DE   | not DE   | not DE  |
| EVM0015648 | LG4 | uncharacterized protein LOC1  | not DE   | not DE   | not DE   | not DE  |
| EVM0007334 | LG4 | uncharacterized protein LOC1  | not DE   | not DE   | not DE   | not DE  |
| EVM0008596 | LG4 | uncharacterized protein LOC1  | not DE   | not DE   | not DE   | not DE  |
| EVM0010134 | LG4 | uncharacterized protein LOC1  | not DE   | not DE   | not DE   | not DE  |
| EVM0003155 | LG4 | uncharacterized protein LOC1  | not DE   | not DE   | not DE   | not DE  |
| EVM0014508 | LG4 | uncharacterized protein LOC1  | not DE   | not DE   | not DE   | not DE  |
| EVM0022365 | LG4 | uncharacterized protein LOC1  | not DE   | not DE   | not DE   | not DE  |
| EVM0012800 | LG4 | uncharacterized protein LOC1  | not DE   | not DE   | not DE   | not DE  |
| EVM0020407 | LG4 | uncharacterized protein ycf3  | not DE   | not DE   | not DE   | not DE  |
| EVM0023609 | LG4 | uncharacterized protein ycf4  | not DE   | not DE   | not DE   | not DE  |
| EVM0024418 | LG4 | uncharacterized serine-rich   | not DE   | not DE   | not DE   | not DE  |
| EVM0023876 | LG4 | uroporphyrinogen-III synthase | not DE   | not DE   | not DE   | not DE  |
| EVM0014947 | LG4 | vacuolar iron transporter hcp | not DE   | not DE   | not DE   | not DE  |
| EVM0002299 | LG4 | vacuolar protein sorting-ass  | not DE   | not DE   | not DE   | not DE  |

|            |     |                               |          |          |          |         |
|------------|-----|-------------------------------|----------|----------|----------|---------|
| EVM0022689 | LG4 | vacuolar protein sorting-ass  | not DE   | not DE   | not DE   | not DE  |
| EVM0003708 | LG4 | vacuolar protein sorting-ass  | not DE   | not DE   | not DE   | not DE  |
| EVM0002393 | LG4 | xylem cysteine proteinase 2-  | not DE   | not DE   | not DE   | not DE  |
| EVM0003253 | LG4 | zinc finger CCCH domain-cont  | not DE   | not DE   | not DE   | not DE  |
| EVM0016568 | LG4 | zinc finger and BTB domain-c  | not DE   | not DE   | not DE   | not DE  |
| EVM0005543 | LG4 | zinc finger protein NUTCRACK  | not DE   | not DE   | not DE   | not DE  |
| EVM0013840 | LG4 | zinc-finger homeodomain prot  | not DE   | not DE   | not DE   | not DE  |
| EVM0001150 | LG4 | 1,6-rhamnosyltransferase      | not DE   | not DE   | not DE   | not DE  |
| EVM0023986 | LG4 | 14-3-3 protein                | not DE   | not DE   | not DE   | not DE  |
| EVM0015017 | LG4 | 3-hydroxy-3-methylglutaryl co | 1.222054 | 0.031485 | not DE   | not DE  |
| EVM0004025 | LG4 | 3-isopropylmalate dehydratase | not DE   | not DE   | not DE   | not DE  |
| EVM0004640 | LG4 | 40S ribosomal protein S18, pu | not DE   | not DE   | not DE   | not DE  |
| EVM0014747 | LG4 | ABC transporter G family memb | not DE   | not DE   | not DE   | not DE  |
| EVM0006963 | LG4 | ACT domain repeat 3 isoform l | not DE   | not DE   | not DE   | not DE  |
| EVM0009580 | LG4 | AMP dependent ligase, putativ | not DE   | not DE   | not DE   | not DE  |
| EVM0004681 | LG4 | AMP-dependent synthetase and  | not DE   | not DE   | not DE   | not DE  |
| EVM0010587 | LG4 | AP2 domain-containing transcr | not DE   | not DE   | not DE   | not DE  |
| EVM0020270 | LG4 | AP2/B3-like transcriptional f | not DE   | not DE   | not DE   | not DE  |
| EVM0004933 | LG4 | AP2/B3-like transcriptional f | not DE   | not DE   | not DE   | not DE  |
| EVM0014527 | LG4 | APX                           | not DE   | not DE   | not DE   | not DE  |
| EVM0015605 | LG4 | APX                           | not DE   | not DE   | not DE   | not DE  |
| EVM0022713 | LG4 | ATP binding protein, putative | not DE   | not DE   | not DE   | not DE  |
| EVM0008432 | LG4 | Adenine nucleotide alpha hydr | not DE   | not DE   | not DE   | not DE  |
| EVM0002119 | LG4 | Alpha/beta-Hydrolases superf  | not DE   | not DE   | not DE   | not DE  |
| EVM0004302 | LG4 | Alpha/beta-Hydrolases superf  | not DE   | not DE   | not DE   | not DE  |
| EVM0015079 | LG4 | Amino acid permease 3 -like p | not DE   | not DE   | not DE   | not DE  |
| EVM0020451 | LG4 | Amino acid permease 3 -like p | not DE   | not DE   | not DE   | not DE  |
| EVM0002019 | LG4 | Amino acid permease 6         | 3.480222 | 4.11E-05 | not DE   | not DE  |
| EVM0015494 | LG4 | Amino acid transporter        | not DE   | not DE   | not DE   | not DE  |
| EVM0012783 | LG4 | Aminotransferase ybdL, putati | not DE   | not DE   | not DE   | not DE  |
| EVM0023926 | LG4 | BTB/POZ domain-containing fam | not DE   | not DE   | not DE   | not DE  |
| EVM0011429 | LG4 | Basic helix-loop-helix DNA-bi | not DE   | not DE   | not DE   | not DE  |
| EVM0001074 | LG4 | Basic leucine-zipper 4, putat | not DE   | not DE   | not DE   | not DE  |
| EVM0008499 | LG4 | Basic-leucine zipper transcri | not DE   | not DE   | not DE   | not DE  |
| EVM0018970 | LG4 | Beta HLH protein 93           | not DE   | not DE   | not DE   | not DE  |
| EVM0015537 | LG4 | Blue copper protein precursor | not DE   | not DE   | not DE   | not DE  |
| EVM0016621 | LG4 | BnaA10g21850D                 | not DE   | not DE   | not DE   | not DE  |
| EVM0015468 | LG4 | BnaC04g37990D                 | not DE   | not DE   | not DE   | not DE  |
| EVM0002855 | LG4 | Branched-chain amino acid ami | not DE   | not DE   | not DE   | not DE  |
| EVM0011352 | LG4 | C2H2 and C2HC zinc fingers su | not DE   | not DE   | not DE   | not DE  |
| EVM0022145 | LG4 | CBL-interacting protein kinas | not DE   | not DE   | not DE   | not DE  |
| EVM0001537 | LG4 | Calcium-binding EF-hand famil | not DE   | not DE   | not DE   | not DE  |
| EVM0003141 | LG4 | Calcium-binding EF-hand famil | not DE   | not DE   | not DE   | not DE  |
| EVM0007679 | LG4 | Calcium-binding EF-hand famil | not DE   | not DE   | 1.528131 | 0.02245 |
| EVM0017564 | LG4 | Calcium-binding EF-hand famil | not DE   | not DE   | not DE   | not DE  |
| EVM0013908 | LG4 | Calcium-dependent lipid-bindi | not DE   | not DE   | not DE   | not DE  |
| EVM0001280 | LG4 | Calmodulin like 37, putative  | not DE   | not DE   | not DE   | not DE  |
| EVM0017335 | LG4 | Calmodulin like 37, putative  | not DE   | not DE   | not DE   | not DE  |
| EVM0003517 | LG4 | Calmodulin-like 41, putative  | not DE   | not DE   | not DE   | not DE  |
| EVM0013086 | LG4 | Calmodulin-like 41, putative  | not DE   | not DE   | not DE   | not DE  |
| EVM0006810 | LG4 | Carbon catabolite repressor p | not DE   | not DE   | not DE   | not DE  |
| EVM0012633 | LG4 | Cellulose synthase 6          | not DE   | not DE   | not DE   | not DE  |
| EVM0002582 | LG4 | ChaC-like family protein isof | not DE   | not DE   | not DE   | not DE  |
| EVM0022058 | LG4 | Chaperone DnaJ-domain superf  | not DE   | not DE   | not DE   | not DE  |



|            |     |                                        |          |          |          |         |
|------------|-----|----------------------------------------|----------|----------|----------|---------|
| EVM0012696 | LG4 | Chaperone DnaJ-domain superfamily      | not DE   | not DE   | not DE   | not DE  |
| EVM0018349 | LG4 | Cupredoxin superfamily protein         | not DE   | not DE   | not DE   | not DE  |
| EVM0010597 | LG4 | Cyclin-D3-1 -like protein              | not DE   | not DE   | not DE   | not DE  |
| EVM0011976 | LG4 | Cysteine proteinases superfamily       | 2.486616 | 1.83E-06 | 1.431178 | 0.00299 |
| EVM0020030 | LG4 | Cysteine proteinases superfamily       | not DE   | not DE   | -1.41892 | #####   |
| EVM0013871 | LG4 | Cytochrome B5, n3, ATCB5-D, CB5        | not DE   | not DE   | 1.570939 | 0.00037 |
| EVM0000278 | LG4 | Cytochrome P450                        | not DE   | not DE   | not DE   | not DE  |
| EVM0001612 | LG4 | Cytochrome P450                        | not DE   | not DE   | not DE   | not DE  |
| EVM0002076 | LG4 | Cytochrome P450                        | not DE   | not DE   | not DE   | not DE  |
| EVM0002173 | LG4 | Cytochrome P450                        | not DE   | not DE   | not DE   | not DE  |
| EVM0004126 | LG4 | Cytochrome P450                        | not DE   | not DE   | not DE   | not DE  |
| EVM0005871 | LG4 | Cytochrome P450                        | not DE   | not DE   | not DE   | not DE  |
| EVM0009209 | LG4 | Cytochrome P450                        | not DE   | not DE   | not DE   | not DE  |
| EVM0017084 | LG4 | Cytochrome P450                        | not DE   | not DE   | not DE   | not DE  |
| EVM0022786 | LG4 | Cytochrome P450                        | not DE   | not DE   | not DE   | not DE  |
| EVM0023691 | LG4 | Cytochrome P450 82A3, putative         | not DE   | not DE   | not DE   | not DE  |
| EVM0012864 | LG4 | Cytochrome P450, putative              | not DE   | not DE   | not DE   | not DE  |
| EVM0007372 | LG4 | D5-type cyclin, putative               | not DE   | not DE   | not DE   | not DE  |
| EVM0021928 | LG4 | DNA polymerase epsilon catalytic       | not DE   | not DE   | not DE   | not DE  |
| EVM0000559 | LG4 | DNA/RNA polymerases superfamily        | not DE   | not DE   | not DE   | not DE  |
| EVM0011423 | LG4 | DNA/RNA polymerases superfamily        | not DE   | not DE   | not DE   | not DE  |
| EVM0021798 | LG4 | DNA/RNA polymerases superfamily        | not DE   | not DE   | not DE   | not DE  |
| EVM0011144 | LG4 | E3 ubiquitin-protein ligase A          | 1.810893 | 0.028054 | not DE   | not DE  |
| EVM0012013 | LG4 | EF hand calcium-binding family         | not DE   | not DE   | not DE   | not DE  |
| EVM0013288 | LG4 | EG isoform 2                           | not DE   | not DE   | not DE   | not DE  |
| EVM0012087 | LG4 | Eukaryotic aspartyl protease           | not DE   | not DE   | not DE   | not DE  |
| EVM0013184 | LG4 | Eukaryotic aspartyl protease           | not DE   | not DE   | not DE   | not DE  |
| EVM0007025 | LG4 | Exocyst complex component sec15        | not DE   | not DE   | not DE   | not DE  |
| EVM0015595 | LG4 | Exocyst complex component sec15        | not DE   | not DE   | not DE   | not DE  |
| EVM0010448 | LG4 | Exostosin family protein               | not DE   | not DE   | not DE   | not DE  |
| EVM0007336 | LG4 | Exostosin family protein isoform 1     | -3.89126 | 0.002047 | not DE   | not DE  |
| EVM0019120 | LG4 | Exostosin family protein isoform 2     | not DE   | not DE   | not DE   | not DE  |
| EVM0017622 | LG4 | F-box and wd40 domain protein          | not DE   | not DE   | not DE   | not DE  |
| EVM0021226 | LG4 | F-box family protein                   | not DE   | not DE   | not DE   | not DE  |
| EVM0021263 | LG4 | F-box family protein, putative         | not DE   | not DE   | not DE   | not DE  |
| EVM0001235 | LG4 | F-box protein 7                        | not DE   | not DE   | not DE   | not DE  |
| EVM0017738 | LG4 | FAD-binding domain-containing          | not DE   | not DE   | not DE   | not DE  |
| EVM0005881 | LG4 | FKBP-type peptidyl-prolyl cis-trans    | -1.30915 | 0.018481 | not DE   | not DE  |
| EVM0007507 | LG4 | Flavone synthase II, putative          | not DE   | not DE   | not DE   | not DE  |
| EVM0015265 | LG4 | Formin-like protein 18                 | not DE   | not DE   | not DE   | not DE  |
| EVM0001909 | LG4 | FtsH extracellular protease family     | not DE   | not DE   | not DE   | not DE  |
| EVM0000199 | LG4 | GRAS family transcription factor       | not DE   | not DE   | not DE   | not DE  |
| EVM0014262 | LG4 | GRAS family transcription factor       | not DE   | not DE   | not DE   | not DE  |
| EVM0003543 | LG4 | Galactosyltransferase family           | not DE   | not DE   | not DE   | not DE  |
| EVM0012666 | LG4 | General regulatory factor 8, putative  | not DE   | not DE   | not DE   | not DE  |
| EVM0007994 | LG4 | Glucan endo-1,3-beta-glucosidase       | not DE   | not DE   | not DE   | not DE  |
| EVM0014236 | LG4 | Glutamate-gated kainate-type receptor  | not DE   | not DE   | not DE   | not DE  |
| EVM0022619 | LG4 | Glutathione S-transferase F8, putative | not DE   | not DE   | not DE   | not DE  |
| EVM0004351 | LG4 | Glycosyl hydrolase superfamily         | not DE   | not DE   | 1.391046 | #####   |
| EVM0022345 | LG4 | Glyoxal oxidase-related protein        | not DE   | not DE   | not DE   | not DE  |
| EVM0008693 | LG4 | GroES-like zinc-binding dehydrogenase  | not DE   | not DE   | not DE   | not DE  |
| EVM0010974 | LG4 | GroES-like zinc-binding dehydrogenase  | not DE   | not DE   | not DE   | not DE  |
| EVM0004330 | LG4 | Growth-regulating factor 1             | not DE   | not DE   | not DE   | not DE  |
| EVM0005400 | LG4 | HD domain class transcription factor   | not DE   | not DE   | not DE   | not DE  |

|            |     |                                |          |          |          |         |
|------------|-----|--------------------------------|----------|----------|----------|---------|
| EVM0008767 | LG4 | HXXXD-type acyl-transferase f  | not DE   | not DE   | not DE   | not DE  |
| EVM0019476 | LG4 | Heat stress transcription fac  | not DE   | not DE   | not DE   | not DE  |
| EVM0016884 | LG4 | Homeobox protein 33 isoform l  | not DE   | not DE   | not DE   | not DE  |
| EVM0002396 | LG4 | IAA-amino acid hydrolase ILR1  | not DE   | not DE   | not DE   | not DE  |
| EVM0024645 | LG4 | Inositol 1,3,4-trisphosphate   | not DE   | not DE   | not DE   | not DE  |
| EVM0022422 | LG4 | Integrase-type DNA-binding su  | not DE   | not DE   | not DE   | not DE  |
| EVM0007949 | LG4 | Iron(III)-zinc(II) purple aci  | 2.389519 | 0.021828 | 2.247336 | #####   |
| EVM0001564 | LG4 | JHL18I08.10                    | not DE   | not DE   | not DE   | not DE  |
| EVM0000930 | LG4 | JHL18I08.13                    | not DE   | not DE   | not DE   | not DE  |
| EVM0011217 | LG4 | JHL18I08.9                     | not DE   | not DE   | 1.110451 | 0.03237 |
| EVM0000234 | LG4 | JHL20J20.8 protein             | not DE   | not DE   | not DE   | not DE  |
| EVM0003911 | LG4 | K-box region and MADS-box tra  | not DE   | not DE   | not DE   | not DE  |
| EVM0004448 | LG4 | K-box region and MADS-box tra  | -5.93639 | 4.43E-16 | not DE   | not DE  |
| EVM0015646 | LG4 | KNOTTED-like from              | not DE   | not DE   | not DE   | not DE  |
| EVM0006013 | LG4 | Keratinocyte-associated prote  | not DE   | not DE   | not DE   | not DE  |
| EVM0004149 | LG4 | Kinase superfamily protein     | not DE   | not DE   | not DE   | not DE  |
| EVM0018220 | LG4 | Kinase superfamily protein     | not DE   | not DE   | not DE   | not DE  |
| EVM0021172 | LG4 | L-ascorbate peroxidase T isof  | not DE   | not DE   | not DE   | not DE  |
| EVM0007410 | LG4 | LRR and NB-ARC domains-contain | not DE   | not DE   | not DE   | not DE  |
| EVM0008826 | LG4 | LRR receptor-like serine/thre  | not DE   | not DE   | not DE   | not DE  |
| EVM0010996 | LG4 | Late embryogenesis abundant p  | not DE   | not DE   | not DE   | not DE  |
| EVM0016001 | LG4 | Leucine-rich repeat (LRR) fam  | not DE   | not DE   | not DE   | not DE  |
| EVM0022263 | LG4 | Leucine-rich repeat family pr  | not DE   | not DE   | not DE   | not DE  |
| EVM0011909 | LG4 | Leucine-rich repeat protein k  | not DE   | not DE   | not DE   | not DE  |
| EVM0000290 | LG4 | Lysine decarboxylase family p  | not DE   | not DE   | not DE   | not DE  |
| EVM0006959 | LG4 | MADS box protein 1             | not DE   | not DE   | not DE   | not DE  |
| EVM0012115 | LG4 | MADS domain transcription fac  | not DE   | not DE   | not DE   | not DE  |
| EVM0018234 | LG4 | MLO-like protein 1             | not DE   | not DE   | not DE   | not DE  |
| EVM0006536 | LG4 | MUTL isoform 1                 | not DE   | not DE   | not DE   | not DE  |
| EVM0016180 | LG4 | MUTL isoform 1                 | not DE   | not DE   | not DE   | not DE  |
| EVM0001601 | LG4 | MYB1                           | not DE   | not DE   | not DE   | not DE  |
| EVM0020954 | LG4 | MYB1                           | not DE   | not DE   | not DE   | not DE  |
| EVM0002581 | LG4 | Maf-like protein isoform 2     | not DE   | not DE   | not DE   | not DE  |
| EVM0004300 | LG4 | Major facilitator superfamily  | 1.198039 | 0.022494 | not DE   | not DE  |
| EVM0016667 | LG4 | Major facilitator superfamily  | -2.5899  | 0.012049 | not DE   | not DE  |
| EVM0018206 | LG4 | Mechanosensitive ion channel   | not DE   | not DE   | not DE   | not DE  |
| EVM0009890 | LG4 | Mediator of RNA polymerase II  | not DE   | not DE   | not DE   | not DE  |
| EVM0007859 | LG4 | Membrane-anchored ubiquitin-f  | not DE   | not DE   | not DE   | not DE  |
| EVM0022985 | LG4 | Mog1/PsbP/DUF1795-like photos  | not DE   | not DE   | not DE   | not DE  |
| EVM0012877 | LG4 | Mov34/MPN/PAD-1 family protei  | not DE   | not DE   | not DE   | not DE  |
| EVM0019643 | LG4 | Myb domain protein 84          | not DE   | not DE   | not DE   | not DE  |
| EVM0010443 | LG4 | N-terminal nucleophile aminoh  | not DE   | not DE   | not DE   | not DE  |
| EVM0013699 | LG4 | NADH-ubiquinone oxidoreductas  | not DE   | not DE   | not DE   | not DE  |
| EVM0019583 | LG4 | NB-ARC domain-containing dise  | not DE   | not DE   | not DE   | not DE  |
| EVM0005744 | LG4 | Nbs-llr resistance protein, p  | 1.105468 | 2.01E-06 | not DE   | not DE  |
| EVM0007562 | LG4 | Nucleotide-diphospho-sugar tr  | not DE   | not DE   | not DE   | not DE  |
| EVM0012937 | LG4 | Nucleotide-diphospho-sugar tr  | not DE   | not DE   | not DE   | not DE  |
| EVM0007917 | LG4 | Nucleotide-sugar transporter   | not DE   | not DE   | not DE   | not DE  |
| EVM0013388 | LG4 | Ovate family protein 8, putat  | not DE   | not DE   | not DE   | not DE  |
| EVM0003918 | LG4 | Papain family cysteine protea  | -3.3116  | 0.00066  | not DE   | not DE  |
| EVM0014317 | LG4 | Papain family cysteine protea  | not DE   | not DE   | not DE   | not DE  |
| EVM0000508 | LG4 | Peroxisomal membrane protein   | not DE   | not DE   | not DE   | not DE  |
| EVM0012129 | LG4 | Phosphatase 2C family protein  | not DE   | not DE   | not DE   | not DE  |
| EVM0015170 | LG4 | Phosphatase methylesterase 1   | not DE   | not DE   | not DE   | not DE  |

|            |     |                                |          |          |          |         |
|------------|-----|--------------------------------|----------|----------|----------|---------|
| EVM0003782 | LG4 | Phosphate transporter 1,9      | not DE   | not DE   | not DE   | not DE  |
| EVM0018337 | LG4 | Phosphate-responsive 1 family  | not DE   | not DE   | not DE   | not DE  |
| EVM0002475 | LG4 | Phospholipase A21              | not DE   | not DE   | not DE   | not DE  |
| EVM0013600 | LG4 | Photosystem II 22 kDa protein  | not DE   | not DE   | not DE   | not DE  |
| EVM0004774 | LG4 | Photosystem II reaction center | -1.51725 | 0.004426 | not DE   | not DE  |
| EVM0019272 | LG4 | Plant neutral invertase family | not DE   | not DE   | not DE   | not DE  |
| EVM0003188 | LG4 | Plastid movement impaired1     | not DE   | not DE   | not DE   | not DE  |
| EVM0023121 | LG4 | Plastocyanin A, chloroplast p  | -3.02372 | 1.87E-06 | not DE   | not DE  |
| EVM0009526 | LG4 | Polynucleotidyl transferase,   | not DE   | not DE   | not DE   | not DE  |
| EVM0022236 | LG4 | Pre-mRNA-processing protein 4  | not DE   | not DE   | not DE   | not DE  |
| EVM0019208 | LG4 | Protein P1-P2                  | not DE   | not DE   | not DE   | not DE  |
| EVM0003337 | LG4 | Purine permease 3              | not DE   | not DE   | not DE   | not DE  |
| EVM0006463 | LG4 | Purine permease 3              | 2.149663 | 0.005054 | not DE   | not DE  |
| EVM0010397 | LG4 | Purine permease 3              | not DE   | not DE   | not DE   | not DE  |
| EVM0020243 | LG4 | Purine permease 3              | not DE   | not DE   | not DE   | not DE  |
| EVM0006928 | LG4 | Pyridoxal phosphate (PLP)-dep  | not DE   | not DE   | not DE   | not DE  |
| EVM0004961 | LG4 | Pyridoxal-dependent decarboxy  | not DE   | not DE   | not DE   | not DE  |
| EVM0011221 | LG4 | Pyrophosphate--fructose 6-pho  | not DE   | not DE   | not DE   | not DE  |
| EVM0012457 | LG4 | Queuine tRNA-ribosyltransfera  | not DE   | not DE   | not DE   | not DE  |
| EVM0012321 | LG4 | RING finger protein            | not DE   | not DE   | 1.167065 | 0.01862 |
| EVM0024664 | LG4 | RING finger protein            | not DE   | not DE   | not DE   | not DE  |
| EVM0012496 | LG4 | RING/FYVE/PHD-type zinc finge  | not DE   | not DE   | not DE   | not DE  |
| EVM0017024 | LG4 | RING/U-box superfamily protei  | not DE   | not DE   | -1.18535 | 0.00677 |
| EVM0010432 | LG4 | RNA-binding family protein is  | not DE   | not DE   | not DE   | not DE  |
| EVM0010707 | LG4 | RNA-binding family protein, p  | not DE   | not DE   | not DE   | not DE  |
| EVM0007989 | LG4 | RNI-like superfamily protein   | not DE   | not DE   | not DE   | not DE  |
| EVM0004560 | LG4 | Ralf-like 34, putative         | not DE   | not DE   | not DE   | not DE  |
| EVM0014327 | LG4 | Ralf-like 34, putative         | not DE   | not DE   | not DE   | not DE  |
| EVM0016767 | LG4 | Ras-related protein Rab-18     | not DE   | not DE   | not DE   | not DE  |
| EVM0019569 | LG4 | Rhamnogalacturonate lyase      | not DE   | not DE   | not DE   | not DE  |
| EVM0012445 | LG4 | Ribosomal L18p/L5e family pro  | not DE   | not DE   | not DE   | not DE  |
| EVM0021037 | LG4 | Ribosomal L18p/L5e family pro  | not DE   | not DE   | not DE   | not DE  |
| EVM0012605 | LG4 | Root hair defective 6-like 2,  | not DE   | not DE   | not DE   | not DE  |
| EVM0013445 | LG4 | S-adenosyl-L-methionine-depen  | not DE   | not DE   | not DE   | not DE  |
| EVM0012904 | LG4 | SAUR family protein            | not DE   | not DE   | not DE   | not DE  |
| EVM0009336 | LG4 | SAUR-like auxin-responsive pr  | not DE   | not DE   | not DE   | not DE  |
| EVM0013882 | LG4 | SBP family protein, putative   | not DE   | not DE   | not DE   | not DE  |
| EVM0012229 | LG4 | SKU5 similar 18                | not DE   | not DE   | not DE   | not DE  |
| EVM0016409 | LG4 | Salt tolerance 2, putative is  | not DE   | not DE   | not DE   | not DE  |
| EVM0001188 | LG4 | Sec14p-like phosphatidylinosi  | not DE   | not DE   | not DE   | not DE  |
| EVM0006639 | LG4 | Serine carboxypeptidase-like   | not DE   | not DE   | not DE   | not DE  |
| EVM0010303 | LG4 | Serine--tRNA ligase            | not DE   | not DE   | not DE   | not DE  |
| EVM0000288 | LG4 | Squalene monooxygenase isofor  | not DE   | not DE   | not DE   | not DE  |
| EVM0020902 | LG4 | Structural constituent of rib  | not DE   | not DE   | not DE   | not DE  |
| EVM0023866 | LG4 | Structural constituent of rib  | not DE   | not DE   | not DE   | not DE  |
| EVM0002004 | LG4 | Sucrose transport SUC2 -like   | not DE   | not DE   | not DE   | not DE  |
| EVM0020112 | LG4 | Sucrose-proton symporter 2 is  | not DE   | not DE   | not DE   | not DE  |
| EVM0005284 | LG4 | TCP family transcription fact  | not DE   | not DE   | 1.99314  | 0.00015 |
| EVM0023149 | LG4 | TCP family transcription fact  | not DE   | not DE   | not DE   | not DE  |
| EVM0009018 | LG4 | TMV resistance protein N       | not DE   | not DE   | not DE   | not DE  |
| EVM0012146 | LG4 | TMV resistance protein N       | not DE   | not DE   | not DE   | not DE  |
| EVM0015351 | LG4 | TMV resistance protein N       | not DE   | not DE   | not DE   | not DE  |
| EVM0018986 | LG4 | Tetratricopeptide repeat supe  | not DE   | not DE   | not DE   | not DE  |
| EVM0005771 | LG4 | Tonoplast monosaccharide tran  | not DE   | not DE   | not DE   | not DE  |

|            |     |                               |          |          |          |         |
|------------|-----|-------------------------------|----------|----------|----------|---------|
| EVM0005275 | LG4 | Transmembrane amino acid tran | not DE   | not DE   | not DE   | not DE  |
| EVM0012049 | LG4 | Transmembrane and coiled-coil | not DE   | not DE   | not DE   | not DE  |
| EVM0021117 | LG4 | Transportin 1 isoform 1       | not DE   | not DE   | -1.06575 | #####   |
| EVM0016510 | LG4 | UDP-glycosyltransferase 73B4, | not DE   | not DE   | not DE   | not DE  |
| EVM0002227 | LG4 | Uncharacterized protein TCM_C | not DE   | not DE   | not DE   | not DE  |
| EVM0019586 | LG4 | Uncharacterized protein TCM_C | not DE   | not DE   | not DE   | not DE  |
| EVM0022992 | LG4 | Uncharacterized protein TCM_C | not DE   | not DE   | not DE   | not DE  |
| EVM0010125 | LG4 | Uncharacterized protein TCM_C | not DE   | not DE   | not DE   | not DE  |
| EVM0014523 | LG4 | Uncharacterized protein TCM_C | not DE   | not DE   | not DE   | not DE  |
| EVM0013569 | LG4 | Uncharacterized protein TCM_C | not DE   | not DE   | not DE   | not DE  |
| EVM0023009 | LG4 | Uncharacterized protein TCM_C | not DE   | not DE   | not DE   | not DE  |
| EVM0023756 | LG4 | Uncharacterized protein TCM_C | not DE   | not DE   | not DE   | not DE  |
| EVM0002525 | LG4 | Uncharacterized protein TCM_C | not DE   | not DE   | not DE   | not DE  |
| EVM0000771 | LG4 | Uncharacterized protein TCM_C | not DE   | not DE   | not DE   | not DE  |
| EVM0005460 | LG4 | Uncharacterized protein TCM_C | not DE   | not DE   | not DE   | not DE  |
| EVM0022940 | LG4 | Uncharacterized protein TCM_C | not DE   | not DE   | not DE   | not DE  |
| EVM0001255 | LG4 | Uncharacterized protein TCM_C | not DE   | not DE   | not DE   | not DE  |
| EVM0021224 | LG4 | Uncharacterized protein TCM_C | not DE   | not DE   | not DE   | not DE  |
| EVM0023214 | LG4 | Uncharacterized protein TCM_C | not DE   | not DE   | not DE   | not DE  |
| EVM0019337 | LG4 | Uncharacterized protein TCM_C | -2.15981 | 0.024024 | not DE   | not DE  |
| EVM0012193 | LG4 | Uncharacterized protein isofc | not DE   | not DE   | not DE   | not DE  |
| EVM0023869 | LG4 | Uncharacterized protein isofc | not DE   | not DE   | not DE   | not DE  |
| EVM0002042 | LG4 | Uncharacterized protein isofc | not DE   | not DE   | not DE   | not DE  |
| EVM0000210 | LG4 | VQ motif-containing protein,  | not DE   | not DE   | not DE   | not DE  |
| EVM0008964 | LG4 | VQ motif-containing protein,  | not DE   | not DE   | not DE   | not DE  |
| EVM0012136 | LG4 | VQ motif-containing protein,  | not DE   | not DE   | -1.21499 | 0.00713 |
| EVM0002093 | LG4 | Vacuolar protein sorting 45   | not DE   | not DE   | not DE   | not DE  |
| EVM0020077 | LG4 | Xanthine/uracil permease fami | not DE   | not DE   | not DE   | not DE  |
| EVM0011978 | LG4 | abscisic acid senescence and  | not DE   | not DE   | not DE   | not DE  |
| EVM0019954 | LG4 | abscisic acid senescence and  | not DE   | not DE   | not DE   | not DE  |
| EVM0017776 | LG4 | abscisic acid-insensitive 5-l | not DE   | not DE   | not DE   | not DE  |
| EVM0020738 | LG4 | allene oxide synthase         | not DE   | not DE   | not DE   | not DE  |
| EVM0000325 | LG4 | alpha tubulin 1               | not DE   | not DE   | not DE   | not DE  |
| EVM0000648 | LG4 | auxin influx carrier protein  | not DE   | not DE   | not DE   | not DE  |
| EVM0022128 | LG4 | auxin response factor         | 1.429845 | 0.000329 | not DE   | not DE  |
| EVM0003661 | LG4 | basic cellulase precursor     | not DE   | not DE   | not DE   | not DE  |
| EVM0009422 | LG4 | basic cellulase precursor     | not DE   | not DE   | not DE   | not DE  |
| EVM0000057 | LG4 | calmodulin binding protein, p | not DE   | not DE   | not DE   | not DE  |
| EVM0005874 | LG4 | casein kinase II catalytic su | not DE   | not DE   | not DE   | not DE  |
| EVM0003457 | LG4 | catalase                      | -1.21507 | 0.031616 | not DE   | not DE  |
| EVM0008247 | LG4 | catalase                      | not DE   | not DE   | -1.85889 | #####   |
| EVM0017308 | LG4 | cca trna nucleotidyltransfera | not DE   | not DE   | not DE   | not DE  |
| EVM0005465 | LG4 | cellulose synthase            | not DE   | not DE   | not DE   | not DE  |
| EVM0000129 | LG4 | conserved hypothetical protei | not DE   | not DE   | not DE   | not DE  |
| EVM0000772 | LG4 | conserved hypothetical protei | not DE   | not DE   | not DE   | not DE  |
| EVM0001743 | LG4 | conserved hypothetical protei | not DE   | not DE   | not DE   | not DE  |
| EVM0003407 | LG4 | conserved hypothetical protei | not DE   | not DE   | not DE   | not DE  |
| EVM0004168 | LG4 | conserved hypothetical protei | -2.19102 | 0.023431 | not DE   | not DE  |
| EVM0004519 | LG4 | conserved hypothetical protei | not DE   | not DE   | not DE   | not DE  |
| EVM0004859 | LG4 | conserved hypothetical protei | not DE   | not DE   | not DE   | not DE  |
| EVM0005078 | LG4 | conserved hypothetical protei | not DE   | not DE   | not DE   | not DE  |
| EVM0005950 | LG4 | conserved hypothetical protei | -2.3294  | 0.00018  | not DE   | not DE  |
| EVM0006585 | LG4 | conserved hypothetical protei | not DE   | not DE   | not DE   | not DE  |
| EVM0007697 | LG4 | conserved hypothetical protei | not DE   | not DE   | not DE   | not DE  |

|            |     |                                |          |          |          |         |
|------------|-----|--------------------------------|----------|----------|----------|---------|
| EVM0008147 | LG4 | conserved hypothetical protein | not DE   | not DE   | not DE   | not DE  |
| EVM0008319 | LG4 | conserved hypothetical protein | not DE   | not DE   | not DE   | not DE  |
| EVM0014085 | LG4 | conserved hypothetical protein | -1.7146  | 0.000351 | not DE   | not DE  |
| EVM0015143 | LG4 | conserved hypothetical protein | not DE   | not DE   | not DE   | not DE  |
| EVM0015768 | LG4 | conserved hypothetical protein | not DE   | not DE   | not DE   | not DE  |
| EVM0018190 | LG4 | conserved hypothetical protein | not DE   | not DE   | 1.167002 | #####   |
| EVM0019181 | LG4 | conserved hypothetical protein | not DE   | not DE   | not DE   | not DE  |
| EVM0020504 | LG4 | conserved hypothetical protein | not DE   | not DE   | not DE   | not DE  |
| EVM0023293 | LG4 | conserved hypothetical protein | not DE   | not DE   | not DE   | not DE  |
| EVM0023867 | LG4 | conserved hypothetical protein | not DE   | not DE   | not DE   | not DE  |
| EVM0023904 | LG4 | conserved hypothetical protein | not DE   | not DE   | not DE   | not DE  |
| EVM0017241 | LG4 | cryptochrome 1                 | not DE   | not DE   | not DE   | not DE  |
| EVM0014365 | LG4 | cyclin A, partial              | not DE   | not DE   | not DE   | not DE  |
| EVM0006803 | LG4 | cyclin family protein          | not DE   | not DE   | not DE   | not DE  |
| EVM0004766 | LG4 | dihydroflavonol-4-reductase    | not DE   | not DE   | not DE   | not DE  |
| EVM0024278 | LG4 | dihydroflavonol-4-reductase    | not DE   | not DE   | not DE   | not DE  |
| EVM0024535 | LG4 | flavodoxin family protein      | not DE   | not DE   | not DE   | not DE  |
| EVM0004800 | LG4 | flavonol synthase              | not DE   | not DE   | not DE   | not DE  |
| EVM0017251 | LG4 | flavonol synthase              | not DE   | not DE   | not DE   | not DE  |
| EVM0016467 | LG4 | gast1-like protein             | not DE   | not DE   | not DE   | not DE  |
| EVM0020059 | LG4 | gigantea                       | not DE   | not DE   | not DE   | not DE  |
| EVM0002993 | LG4 | glycosyl transferase family 2  | not DE   | not DE   | not DE   | not DE  |
| EVM0004616 | LG4 | glycosyltransferase family GT  | not DE   | not DE   | not DE   | not DE  |
| EVM0010169 | LG4 | high affinity sulfate transp   | not DE   | not DE   | not DE   | not DE  |
| EVM0023588 | LG4 | homeobox-leucine zipper trans  | -2.03956 | 0.016332 | not DE   | not DE  |
| EVM0016930 | LG4 | hypothetical protein AMTR_s00  | not DE   | not DE   | not DE   | not DE  |
| EVM0020721 | LG4 | hypothetical protein AMTR_s03  | not DE   | not DE   | not DE   | not DE  |
| EVM0006258 | LG4 | hypothetical protein AMTR_s05  | not DE   | not DE   | not DE   | not DE  |
| EVM0012056 | LG4 | hypothetical protein CARUB_v1  | not DE   | not DE   | not DE   | not DE  |
| EVM0001920 | LG4 | hypothetical protein CICLE_v1  | not DE   | not DE   | -1.22846 | #####   |
| EVM0012801 | LG4 | hypothetical protein CICLE_v1  | not DE   | not DE   | not DE   | not DE  |
| EVM0017329 | LG4 | hypothetical protein CICLE_v1  | not DE   | not DE   | not DE   | not DE  |
| EVM0004537 | LG4 | hypothetical protein CICLE_v1  | not DE   | not DE   | -1.05633 | #####   |
| EVM0002766 | LG4 | hypothetical protein CICLE_v1  | not DE   | not DE   | not DE   | not DE  |
| EVM0010579 | LG4 | hypothetical protein CICLE_v1  | not DE   | not DE   | not DE   | not DE  |
| EVM0017729 | LG4 | hypothetical protein CICLE_v1  | not DE   | not DE   | not DE   | not DE  |
| EVM0017266 | LG4 | hypothetical protein CICLE_v1  | not DE   | not DE   | not DE   | not DE  |
| EVM0014599 | LG4 | hypothetical protein CICLE_v1  | not DE   | not DE   | not DE   | not DE  |
| EVM0008721 | LG4 | hypothetical protein CICLE_v1  | not DE   | not DE   | not DE   | not DE  |
| EVM0004393 | LG4 | hypothetical protein CICLE_v1  | not DE   | not DE   | -1.00924 | 0.03908 |
| EVM0024148 | LG4 | hypothetical protein CICLE_v1  | not DE   | not DE   | not DE   | not DE  |
| EVM0013970 | LG4 | hypothetical protein CICLE_v1  | not DE   | not DE   | not DE   | not DE  |
| EVM0001273 | LG4 | hypothetical protein CICLE_v1  | not DE   | not DE   | not DE   | not DE  |
| EVM0024490 | LG4 | hypothetical protein CICLE_v1  | not DE   | not DE   | not DE   | not DE  |
| EVM0019454 | LG4 | hypothetical protein CICLE_v1  | not DE   | not DE   | not DE   | not DE  |
| EVM0015101 | LG4 | hypothetical protein CICLE_v1  | not DE   | not DE   | not DE   | not DE  |
| EVM0014181 | LG4 | hypothetical protein CICLE_v1  | not DE   | not DE   | not DE   | not DE  |
| EVM0016697 | LG4 | hypothetical protein CICLE_v1  | not DE   | not DE   | not DE   | not DE  |
| EVM0020804 | LG4 | hypothetical protein CICLE_v1  | not DE   | not DE   | not DE   | not DE  |
| EVM0016575 | LG4 | hypothetical protein CICLE_v1  | not DE   | not DE   | not DE   | not DE  |
| EVM0008104 | LG4 | hypothetical protein CICLE_v1  | not DE   | not DE   | not DE   | not DE  |
| EVM0019499 | LG4 | hypothetical protein CICLE_v1  | not DE   | not DE   | not DE   | not DE  |
| EVM0023837 | LG4 | hypothetical protein CICLE_v1  | not DE   | not DE   | not DE   | not DE  |
| EVM0017228 | LG4 | hypothetical protein CICLE_v1  | not DE   | not DE   | not DE   | not DE  |

|            |     |                               |          |          |          |         |
|------------|-----|-------------------------------|----------|----------|----------|---------|
| EVM0006587 | LG4 | hypothetical protein CICLE_v1 | not DE   | not DE   | not DE   | not DE  |
| EVM0008467 | LG4 | hypothetical protein CICLE_v1 | not DE   | not DE   | not DE   | not DE  |
| EVM0017742 | LG4 | hypothetical protein CICLE_v1 | not DE   | not DE   | not DE   | not DE  |
| EVM0024308 | LG4 | hypothetical protein CICLE_v1 | not DE   | not DE   | not DE   | not DE  |
| EVM0001795 | LG4 | hypothetical protein CICLE_v1 | not DE   | not DE   | not DE   | not DE  |
| EVM0019405 | LG4 | hypothetical protein CICLE_v1 | not DE   | not DE   | not DE   | not DE  |
| EVM0010267 | LG4 | hypothetical protein CICLE_v1 | not DE   | not DE   | not DE   | not DE  |
| EVM0016942 | LG4 | hypothetical protein CICLE_v1 | not DE   | not DE   | not DE   | not DE  |
| EVM0002158 | LG4 | hypothetical protein CICLE_v1 | not DE   | not DE   | not DE   | not DE  |
| EVM0015014 | LG4 | hypothetical protein CICLE_v1 | not DE   | not DE   | not DE   | not DE  |
| EVM0003156 | LG4 | hypothetical protein CICLE_v1 | not DE   | not DE   | not DE   | not DE  |
| EVM0016123 | LG4 | hypothetical protein CICLE_v1 | not DE   | not DE   | not DE   | not DE  |
| EVM0002851 | LG4 | hypothetical protein CICLE_v1 | not DE   | not DE   | not DE   | not DE  |
| EVM0006043 | LG4 | hypothetical protein CICLE_v1 | not DE   | not DE   | not DE   | not DE  |
| EVM0009659 | LG4 | hypothetical protein CICLE_v1 | not DE   | not DE   | not DE   | not DE  |
| EVM0011281 | LG4 | hypothetical protein CICLE_v1 | not DE   | not DE   | not DE   | not DE  |
| EVM0000396 | LG4 | hypothetical protein CICLE_v1 | not DE   | not DE   | not DE   | not DE  |
| EVM0004137 | LG4 | hypothetical protein CICLE_v1 | not DE   | not DE   | not DE   | not DE  |
| EVM0002075 | LG4 | hypothetical protein CICLE_v1 | not DE   | not DE   | not DE   | not DE  |
| EVM0002483 | LG4 | hypothetical protein CICLE_v1 | 3.139415 | 0.011295 | not DE   | not DE  |
| EVM0023489 | LG4 | hypothetical protein CICLE_v1 | not DE   | not DE   | not DE   | not DE  |
| EVM0002554 | LG4 | hypothetical protein CICLE_v1 | -1.08747 | 0.005315 | not DE   | not DE  |
| EVM0020607 | LG4 | hypothetical protein CICLE_v1 | not DE   | not DE   | not DE   | not DE  |
| EVM0006326 | LG4 | hypothetical protein CICLE_v1 | not DE   | not DE   | not DE   | not DE  |
| EVM0004718 | LG4 | hypothetical protein CICLE_v1 | not DE   | not DE   | not DE   | not DE  |
| EVM0000400 | LG4 | hypothetical protein CICLE_v1 | not DE   | not DE   | not DE   | not DE  |
| EVM0020223 | LG4 | hypothetical protein CICLE_v1 | 1.538212 | 0.001692 | not DE   | not DE  |
| EVM0005920 | LG4 | hypothetical protein CICLE_v1 | not DE   | not DE   | not DE   | not DE  |
| EVM0002726 | LG4 | hypothetical protein CICLE_v1 | not DE   | not DE   | not DE   | not DE  |
| EVM0024016 | LG4 | hypothetical protein CICLE_v1 | not DE   | not DE   | not DE   | not DE  |
| EVM0017571 | LG4 | hypothetical protein CICLE_v1 | not DE   | not DE   | not DE   | not DE  |
| EVM0015590 | LG4 | hypothetical protein CICLE_v1 | -1.47723 | 0.037706 | not DE   | not DE  |
| EVM0004458 | LG4 | hypothetical protein CICLE_v1 | not DE   | not DE   | not DE   | not DE  |
| EVM0014437 | LG4 | hypothetical protein CICLE_v1 | not DE   | not DE   | not DE   | not DE  |
| EVM0005055 | LG4 | hypothetical protein CICLE_v1 | not DE   | not DE   | not DE   | not DE  |
| EVM0015987 | LG4 | hypothetical protein CICLE_v1 | not DE   | not DE   | not DE   | not DE  |
| EVM0000819 | LG4 | hypothetical protein CICLE_v1 | not DE   | not DE   | 1.163258 | 0.03382 |
| EVM0007249 | LG4 | hypothetical protein CICLE_v1 | not DE   | not DE   | not DE   | not DE  |
| EVM0017310 | LG4 | hypothetical protein CICLE_v1 | not DE   | not DE   | not DE   | not DE  |
| EVM0007531 | LG4 | hypothetical protein CICLE_v1 | not DE   | not DE   | not DE   | not DE  |
| EVM0009851 | LG4 | hypothetical protein CICLE_v1 | not DE   | not DE   | not DE   | not DE  |
| EVM0021914 | LG4 | hypothetical protein CICLE_v1 | not DE   | not DE   | not DE   | not DE  |
| EVM0024460 | LG4 | hypothetical protein CICLE_v1 | not DE   | not DE   | not DE   | not DE  |
| EVM0018726 | LG4 | hypothetical protein CICLE_v1 | not DE   | not DE   | not DE   | not DE  |
| EVM0024229 | LG4 | hypothetical protein CICLE_v1 | not DE   | not DE   | not DE   | not DE  |
| EVM0005711 | LG4 | hypothetical protein CICLE_v1 | 3.32486  | 0.00017  | not DE   | not DE  |
| EVM0004462 | LG4 | hypothetical protein CICLE_v1 | not DE   | not DE   | not DE   | not DE  |
| EVM0021647 | LG4 | hypothetical protein CICLE_v1 | not DE   | not DE   | not DE   | not DE  |
| EVM0007525 | LG4 | hypothetical protein CICLE_v1 | not DE   | not DE   | not DE   | not DE  |
| EVM0009420 | LG4 | hypothetical protein CICLE_v1 | not DE   | not DE   | not DE   | not DE  |
| EVM0010783 | LG4 | hypothetical protein CICLE_v1 | not DE   | not DE   | not DE   | not DE  |
| EVM0018275 | LG4 | hypothetical protein CICLE_v1 | not DE   | not DE   | not DE   | not DE  |
| EVM0001579 | LG4 | hypothetical protein CICLE_v1 | not DE   | not DE   | not DE   | not DE  |
| EVM0009680 | LG4 | hypothetical protein CICLE_v1 | not DE   | not DE   | not DE   | not DE  |

|            |     |                               |          |          |         |         |
|------------|-----|-------------------------------|----------|----------|---------|---------|
| EVM0023004 | LG4 | hypothetical protein CICLE_v1 | not DE   | not DE   | not DE  | not DE  |
| EVM0011029 | LG4 | hypothetical protein CICLE_v1 | not DE   | not DE   | not DE  | not DE  |
| EVM0000903 | LG4 | hypothetical protein CICLE_v1 | not DE   | not DE   | not DE  | not DE  |
| EVM0021852 | LG4 | hypothetical protein CICLE_v1 | not DE   | not DE   | not DE  | not DE  |
| EVM0016943 | LG4 | hypothetical protein CICLE_v1 | not DE   | not DE   | not DE  | not DE  |
| EVM0016199 | LG4 | hypothetical protein CICLE_v1 | not DE   | not DE   | not DE  | not DE  |
| EVM0000988 | LG4 | hypothetical protein CICLE_v1 | not DE   | not DE   | not DE  | not DE  |
| EVM0005101 | LG4 | hypothetical protein CICLE_v1 | 1.561411 | 9.38E-05 | not DE  | not DE  |
| EVM0005985 | LG4 | hypothetical protein CICLE_v1 | not DE   | not DE   | not DE  | not DE  |
| EVM0001158 | LG4 | hypothetical protein CICLE_v1 | not DE   | not DE   | not DE  | not DE  |
| EVM0014488 | LG4 | hypothetical protein CICLE_v1 | not DE   | not DE   | not DE  | not DE  |
| EVM0007646 | LG4 | hypothetical protein CICLE_v1 | not DE   | not DE   | not DE  | not DE  |
| EVM0023806 | LG4 | hypothetical protein CICLE_v1 | not DE   | not DE   | not DE  | not DE  |
| EVM0000523 | LG4 | hypothetical protein CICLE_v1 | not DE   | not DE   | not DE  | not DE  |
| EVM0005000 | LG4 | hypothetical protein CICLE_v1 | not DE   | not DE   | not DE  | not DE  |
| EVM0015269 | LG4 | hypothetical protein CICLE_v1 | not DE   | not DE   | not DE  | not DE  |
| EVM0024292 | LG4 | hypothetical protein CICLE_v1 | -1.42887 | 8.39E-08 | not DE  | not DE  |
| EVM0012503 | LG4 | hypothetical protein CICLE_v1 | not DE   | not DE   | not DE  | not DE  |
| EVM0011115 | LG4 | hypothetical protein CICLE_v1 | not DE   | not DE   | not DE  | not DE  |
| EVM0019832 | LG4 | hypothetical protein CICLE_v1 | not DE   | not DE   | not DE  | not DE  |
| EVM0016720 | LG4 | hypothetical protein CICLE_v1 | not DE   | not DE   | not DE  | not DE  |
| EVM0021078 | LG4 | hypothetical protein CICLE_v1 | not DE   | not DE   | not DE  | not DE  |
| EVM0004223 | LG4 | hypothetical protein CICLE_v1 | not DE   | not DE   | not DE  | not DE  |
| EVM0019795 | LG4 | hypothetical protein CICLE_v1 | -1.47142 | 0.001704 | not DE  | not DE  |
| EVM0013687 | LG4 | hypothetical protein CICLE_v1 | not DE   | not DE   | not DE  | not DE  |
| EVM0002418 | LG4 | hypothetical protein CICLE_v1 | not DE   | not DE   | not DE  | not DE  |
| EVM0006284 | LG4 | hypothetical protein CICLE_v1 | not DE   | not DE   | not DE  | not DE  |
| EVM0017372 | LG4 | hypothetical protein CICLE_v1 | not DE   | not DE   | not DE  | not DE  |
| EVM0020312 | LG4 | hypothetical protein CICLE_v1 | not DE   | not DE   | not DE  | not DE  |
| EVM0010279 | LG4 | hypothetical protein CICLE_v1 | not DE   | not DE   | not DE  | not DE  |
| EVM0005707 | LG4 | hypothetical protein CICLE_v1 | not DE   | not DE   | not DE  | not DE  |
| EVM0020634 | LG4 | hypothetical protein CICLE_v1 | not DE   | not DE   | not DE  | not DE  |
| EVM0006870 | LG4 | hypothetical protein CICLE_v1 | not DE   | not DE   | not DE  | not DE  |
| EVM0004228 | LG4 | hypothetical protein CICLE_v1 | not DE   | not DE   | not DE  | not DE  |
| EVM0019200 | LG4 | hypothetical protein CICLE_v1 | 1.779119 | 0.005361 | not DE  | not DE  |
| EVM0013772 | LG4 | hypothetical protein CICLE_v1 | not DE   | not DE   | not DE  | not DE  |
| EVM0005650 | LG4 | hypothetical protein CICLE_v1 | 2.206926 | 0.011046 | not DE  | not DE  |
| EVM0014461 | LG4 | hypothetical protein CICLE_v1 | not DE   | not DE   | not DE  | not DE  |
| EVM0012248 | LG4 | hypothetical protein CICLE_v1 | not DE   | not DE   | not DE  | not DE  |
| EVM0005961 | LG4 | hypothetical protein CICLE_v1 | not DE   | not DE   | not DE  | not DE  |
| EVM0012960 | LG4 | hypothetical protein CICLE_v1 | not DE   | not DE   | not DE  | not DE  |
| EVM0015198 | LG4 | hypothetical protein CICLE_v1 | not DE   | not DE   | not DE  | not DE  |
| EVM0022321 | LG4 | hypothetical protein CICLE_v1 | not DE   | not DE   | not DE  | not DE  |
| EVM0024580 | LG4 | hypothetical protein CICLE_v1 | not DE   | not DE   | not DE  | not DE  |
| EVM0004762 | LG4 | hypothetical protein CICLE_v1 | not DE   | not DE   | not DE  | not DE  |
| EVM0007874 | LG4 | hypothetical protein CICLE_v1 | not DE   | not DE   | not DE  | not DE  |
| EVM0020020 | LG4 | hypothetical protein CICLE_v1 | 1.976374 | 0.014033 | not DE  | not DE  |
| EVM0024218 | LG4 | hypothetical protein CICLE_v1 | not DE   | not DE   | not DE  | not DE  |
| EVM0004387 | LG4 | hypothetical protein CICLE_v1 | not DE   | not DE   | 1.32773 | 0.03198 |
| EVM0011893 | LG4 | hypothetical protein CICLE_v1 | not DE   | not DE   | not DE  | not DE  |
| EVM0013166 | LG4 | hypothetical protein CICLE_v1 | not DE   | not DE   | not DE  | not DE  |
| EVM0008633 | LG4 | hypothetical protein CICLE_v1 | not DE   | not DE   | not DE  | not DE  |
| EVM0017105 | LG4 | hypothetical protein CICLE_v1 | not DE   | not DE   | not DE  | not DE  |
| EVM0000433 | LG4 | hypothetical protein CICLE_v1 | not DE   | not DE   | not DE  | not DE  |

|            |     |                               |          |          |          |         |
|------------|-----|-------------------------------|----------|----------|----------|---------|
| EVM0006939 | LG4 | hypothetical protein CICLE_v1 | not DE   | not DE   | -3.12364 | 0.04041 |
| EVM0017915 | LG4 | hypothetical protein CICLE_v1 | not DE   | not DE   | not DE   | not DE  |
| EVM0000929 | LG4 | hypothetical protein CICLE_v1 | not DE   | not DE   | not DE   | not DE  |
| EVM0024219 | LG4 | hypothetical protein CICLE_v1 | not DE   | not DE   | not DE   | not DE  |
| EVM0010233 | LG4 | hypothetical protein CICLE_v1 | not DE   | not DE   | not DE   | not DE  |
| EVM0003857 | LG4 | hypothetical protein CICLE_v1 | not DE   | not DE   | not DE   | not DE  |
| EVM0011060 | LG4 | hypothetical protein CICLE_v1 | not DE   | not DE   | not DE   | not DE  |
| EVM0000517 | LG4 | hypothetical protein CICLE_v1 | not DE   | not DE   | not DE   | not DE  |
| EVM0003655 | LG4 | hypothetical protein CICLE_v1 | not DE   | not DE   | not DE   | not DE  |
| EVM0017723 | LG4 | hypothetical protein CICLE_v1 | not DE   | not DE   | not DE   | not DE  |
| EVM0023146 | LG4 | hypothetical protein CICLE_v1 | not DE   | not DE   | not DE   | not DE  |
| EVM0007818 | LG4 | hypothetical protein CICLE_v1 | not DE   | not DE   | not DE   | not DE  |
| EVM0020977 | LG4 | hypothetical protein CICLE_v1 | not DE   | not DE   | not DE   | not DE  |
| EVM0019060 | LG4 | hypothetical protein CICLE_v1 | not DE   | not DE   | not DE   | not DE  |
| EVM0021148 | LG4 | hypothetical protein CICLE_v1 | not DE   | not DE   | not DE   | not DE  |
| EVM0017411 | LG4 | hypothetical protein CICLE_v1 | not DE   | not DE   | not DE   | not DE  |
| EVM0000032 | LG4 | hypothetical protein CICLE_v1 | 3.97154  | 0.025756 | not DE   | not DE  |
| EVM0019401 | LG4 | hypothetical protein CICLE_v1 | not DE   | not DE   | not DE   | not DE  |
| EVM0001421 | LG4 | hypothetical protein CICLE_v1 | not DE   | not DE   | not DE   | not DE  |
| EVM0011465 | LG4 | hypothetical protein CICLE_v1 | not DE   | not DE   | not DE   | not DE  |
| EVM0000153 | LG4 | hypothetical protein CICLE_v1 | not DE   | not DE   | not DE   | not DE  |
| EVM0016113 | LG4 | hypothetical protein CICLE_v1 | not DE   | not DE   | not DE   | not DE  |
| EVM0002677 | LG4 | hypothetical protein CICLE_v1 | not DE   | not DE   | -1.19303 | 0.01229 |
| EVM0002349 | LG4 | hypothetical protein CICLE_v1 | not DE   | not DE   | not DE   | not DE  |
| EVM0018311 | LG4 | hypothetical protein CICLE_v1 | 2.791136 | 9.23E-12 | not DE   | not DE  |
| EVM0001588 | LG4 | hypothetical protein CICLE_v1 | not DE   | not DE   | not DE   | not DE  |
| EVM0016232 | LG4 | hypothetical protein CICLE_v1 | not DE   | not DE   | not DE   | not DE  |
| EVM0013368 | LG4 | hypothetical protein CICLE_v1 | not DE   | not DE   | not DE   | not DE  |
| EVM0011784 | LG4 | hypothetical protein CICLE_v1 | -1.34007 | 0.003716 | not DE   | not DE  |
| EVM0011061 | LG4 | hypothetical protein CICLE_v1 | not DE   | not DE   | not DE   | not DE  |
| EVM0023206 | LG4 | hypothetical protein CICLE_v1 | not DE   | not DE   | not DE   | not DE  |
| EVM0008647 | LG4 | hypothetical protein CICLE_v1 | not DE   | not DE   | not DE   | not DE  |
| EVM0003887 | LG4 | hypothetical protein CICLE_v1 | not DE   | not DE   | not DE   | not DE  |
| EVM0013183 | LG4 | hypothetical protein CICLE_v1 | not DE   | not DE   | not DE   | not DE  |
| EVM0018180 | LG4 | hypothetical protein CICLE_v1 | not DE   | not DE   | not DE   | not DE  |
| EVM0016162 | LG4 | hypothetical protein CICLE_v1 | not DE   | not DE   | not DE   | not DE  |
| EVM0005780 | LG4 | hypothetical protein CICLE_v1 | not DE   | not DE   | not DE   | not DE  |
| EVM0011849 | LG4 | hypothetical protein CICLE_v1 | not DE   | not DE   | not DE   | not DE  |
| EVM0018725 | LG4 | hypothetical protein CICLE_v1 | not DE   | not DE   | not DE   | not DE  |
| EVM0016521 | LG4 | hypothetical protein CICLE_v1 | not DE   | not DE   | not DE   | not DE  |
| EVM0011708 | LG4 | hypothetical protein CICLE_v1 | not DE   | not DE   | not DE   | not DE  |
| EVM0012964 | LG4 | hypothetical protein CICLE_v1 | not DE   | not DE   | not DE   | not DE  |
| EVM0003534 | LG4 | hypothetical protein CICLE_v1 | not DE   | not DE   | 1.410617 | 0.0037  |
| EVM0008348 | LG4 | hypothetical protein CICLE_v1 | -1.12027 | 0.011367 | not DE   | not DE  |
| EVM0005636 | LG4 | hypothetical protein CICLE_v1 | 1.581117 | 0.012564 | not DE   | not DE  |
| EVM0016802 | LG4 | hypothetical protein CICLE_v1 | -1.05025 | 0.003251 | 1.036858 | #####   |
| EVM0010135 | LG4 | hypothetical protein CICLE_v1 | not DE   | not DE   | not DE   | not DE  |
| EVM0000024 | LG4 | hypothetical protein CICLE_v1 | not DE   | not DE   | not DE   | not DE  |
| EVM0000424 | LG4 | hypothetical protein CICLE_v1 | -1.4956  | 0.049742 | not DE   | not DE  |
| EVM0024659 | LG4 | hypothetical protein CICLE_v1 | not DE   | not DE   | not DE   | not DE  |
| EVM0007910 | LG4 | hypothetical protein CICLE_v1 | not DE   | not DE   | not DE   | not DE  |
| EVM0010876 | LG4 | hypothetical protein CICLE_v1 | not DE   | not DE   | not DE   | not DE  |
| EVM0022957 | LG4 | hypothetical protein CICLE_v1 | not DE   | not DE   | not DE   | not DE  |
| EVM0002853 | LG4 | hypothetical protein CICLE_v1 | not DE   | not DE   | not DE   | not DE  |



|            |     |                               |          |          |          |         |
|------------|-----|-------------------------------|----------|----------|----------|---------|
| EVM0007417 | LG4 | hypothetical protein CICLE_v1 | not DE   | not DE   | not DE   | not DE  |
| EVM0016855 | LG4 | hypothetical protein CICLE_v1 | not DE   | not DE   | not DE   | not DE  |
| EVM0009843 | LG4 | hypothetical protein CICLE_v1 | 3.483274 | 0.001468 | not DE   | not DE  |
| EVM0011971 | LG4 | hypothetical protein CICLE_v1 | not DE   | not DE   | not DE   | not DE  |
| EVM0012422 | LG4 | hypothetical protein CICLE_v1 | not DE   | not DE   | not DE   | not DE  |
| EVM0013419 | LG4 | hypothetical protein CICLE_v1 | not DE   | not DE   | not DE   | not DE  |
| EVM0017519 | LG4 | hypothetical protein CICLE_v1 | not DE   | not DE   | not DE   | not DE  |
| EVM0011968 | LG4 | hypothetical protein CICLE_v1 | not DE   | not DE   | not DE   | not DE  |
| EVM0002983 | LG4 | hypothetical protein CICLE_v1 | not DE   | not DE   | not DE   | not DE  |
| EVM0024531 | LG4 | hypothetical protein CICLE_v1 | not DE   | not DE   | not DE   | not DE  |
| EVM0016872 | LG4 | hypothetical protein CICLE_v1 | 2.167621 | 0.000495 | not DE   | not DE  |
| EVM0011132 | LG4 | hypothetical protein CICLE_v1 | not DE   | not DE   | not DE   | not DE  |
| EVM0007642 | LG4 | hypothetical protein CICLE_v1 | not DE   | not DE   | not DE   | not DE  |
| EVM0012715 | LG4 | hypothetical protein CICLE_v1 | not DE   | not DE   | not DE   | not DE  |
| EVM0014591 | LG4 | hypothetical protein CICLE_v1 | not DE   | not DE   | not DE   | not DE  |
| EVM0020424 | LG4 | hypothetical protein CICLE_v1 | not DE   | not DE   | not DE   | not DE  |
| EVM0008398 | LG4 | hypothetical protein CICLE_v1 | 1.950884 | 5.34E-05 | not DE   | not DE  |
| EVM0017940 | LG4 | hypothetical protein CICLE_v1 | not DE   | not DE   | not DE   | not DE  |
| EVM0008760 | LG4 | hypothetical protein CICLE_v1 | not DE   | not DE   | not DE   | not DE  |
| EVM0004172 | LG4 | hypothetical protein CICLE_v1 | not DE   | not DE   | not DE   | not DE  |
| EVM0009953 | LG4 | hypothetical protein CICLE_v1 | 1.317103 | 4.99E-05 | not DE   | not DE  |
| EVM0012446 | LG4 | hypothetical protein CICLE_v1 | not DE   | not DE   | not DE   | not DE  |
| EVM0004528 | LG4 | hypothetical protein CICLE_v1 | not DE   | not DE   | not DE   | not DE  |
| EVM0001316 | LG4 | hypothetical protein CICLE_v1 | not DE   | not DE   | not DE   | not DE  |
| EVM0018547 | LG4 | hypothetical protein CICLE_v1 | not DE   | not DE   | not DE   | not DE  |
| EVM0024047 | LG4 | hypothetical protein CICLE_v1 | not DE   | not DE   | not DE   | not DE  |
| EVM0024206 | LG4 | hypothetical protein CICLE_v1 | not DE   | not DE   | not DE   | not DE  |
| EVM0017826 | LG4 | hypothetical protein CICLE_v1 | not DE   | not DE   | not DE   | not DE  |
| EVM0003984 | LG4 | hypothetical protein CICLE_v1 | not DE   | not DE   | not DE   | not DE  |
| EVM0005087 | LG4 | hypothetical protein CICLE_v1 | not DE   | not DE   | not DE   | not DE  |
| EVM0011642 | LG4 | hypothetical protein CICLE_v1 | not DE   | not DE   | not DE   | not DE  |
| EVM0015767 | LG4 | hypothetical protein CICLE_v1 | not DE   | not DE   | not DE   | not DE  |
| EVM0019709 | LG4 | hypothetical protein CICLE_v1 | not DE   | not DE   | not DE   | not DE  |
| EVM0024080 | LG4 | hypothetical protein CICLE_v1 | 3.020988 | 0.00064  | not DE   | not DE  |
| EVM0022447 | LG4 | hypothetical protein CICLE_v1 | not DE   | not DE   | not DE   | not DE  |
| EVM0013586 | LG4 | hypothetical protein CICLE_v1 | not DE   | not DE   | not DE   | not DE  |
| EVM0017849 | LG4 | hypothetical protein CICLE_v1 | not DE   | not DE   | not DE   | not DE  |
| EVM0021579 | LG4 | hypothetical protein CICLE_v1 | not DE   | not DE   | not DE   | not DE  |
| EVM0015259 | LG4 | hypothetical protein CICLE_v1 | not DE   | not DE   | not DE   | not DE  |
| EVM0018303 | LG4 | hypothetical protein CICLE_v1 | not DE   | not DE   | not DE   | not DE  |
| EVM0000969 | LG4 | hypothetical protein CICLE_v1 | not DE   | not DE   | not DE   | not DE  |
| EVM0009241 | LG4 | hypothetical protein CICLE_v1 | not DE   | not DE   | not DE   | not DE  |
| EVM0000289 | LG4 | hypothetical protein CICLE_v1 | not DE   | not DE   | 1.449767 | 0.01152 |
| EVM0017410 | LG4 | hypothetical protein CICLE_v1 | not DE   | not DE   | not DE   | not DE  |
| EVM0019154 | LG4 | hypothetical protein CICLE_v1 | 1.080704 | 0.021125 | not DE   | not DE  |
| EVM0015193 | LG4 | hypothetical protein CICLE_v1 | not DE   | not DE   | not DE   | not DE  |
| EVM0024105 | LG4 | hypothetical protein CICLE_v1 | 1.270427 | 0.003969 | not DE   | not DE  |
| EVM0011350 | LG4 | hypothetical protein CICLE_v1 | not DE   | not DE   | not DE   | not DE  |
| EVM0004111 | LG4 | hypothetical protein CICLE_v1 | not DE   | not DE   | not DE   | not DE  |
| EVM0012302 | LG4 | hypothetical protein CICLE_v1 | not DE   | not DE   | not DE   | not DE  |
| EVM0003949 | LG4 | hypothetical protein CICLE_v1 | not DE   | not DE   | not DE   | not DE  |
| EVM0000366 | LG4 | hypothetical protein CICLE_v1 | not DE   | not DE   | 1.191779 | 0.01835 |
| EVM0009424 | LG4 | hypothetical protein CICLE_v1 | not DE   | not DE   | not DE   | not DE  |
| EVM0000518 | LG4 | hypothetical protein CICLE_v1 | not DE   | not DE   | not DE   | not DE  |

|            |     |                               |          |          |          |         |
|------------|-----|-------------------------------|----------|----------|----------|---------|
| EVM0007498 | LG4 | hypothetical protein CICLE_v1 | not DE   | not DE   | not DE   | not DE  |
| EVM0020540 | LG4 | hypothetical protein CICLE_v1 | not DE   | not DE   | not DE   | not DE  |
| EVM0001100 | LG4 | hypothetical protein CICLE_v1 | not DE   | not DE   | not DE   | not DE  |
| EVM0014322 | LG4 | hypothetical protein CICLE_v1 | not DE   | not DE   | not DE   | not DE  |
| EVM0019738 | LG4 | hypothetical protein CICLE_v1 | not DE   | not DE   | not DE   | not DE  |
| EVM0004406 | LG4 | hypothetical protein CICLE_v1 | not DE   | not DE   | not DE   | not DE  |
| EVM0001228 | LG4 | hypothetical protein CICLE_v1 | not DE   | not DE   | not DE   | not DE  |
| EVM0014534 | LG4 | hypothetical protein CICLE_v1 | not DE   | not DE   | not DE   | not DE  |
| EVM0001419 | LG4 | hypothetical protein CICLE_v1 | not DE   | not DE   | not DE   | not DE  |
| EVM0004814 | LG4 | hypothetical protein CICLE_v1 | not DE   | not DE   | not DE   | not DE  |
| EVM0022163 | LG4 | hypothetical protein CICLE_v1 | not DE   | not DE   | not DE   | not DE  |
| EVM0005293 | LG4 | hypothetical protein CICLE_v1 | 1.12111  | 0.007324 | not DE   | not DE  |
| EVM0017278 | LG4 | hypothetical protein CICLE_v1 | not DE   | not DE   | not DE   | not DE  |
| EVM0007723 | LG4 | hypothetical protein CICLE_v1 | not DE   | not DE   | not DE   | not DE  |
| EVM0017393 | LG4 | hypothetical protein CICLE_v1 | not DE   | not DE   | not DE   | not DE  |
| EVM0019945 | LG4 | hypothetical protein CICLE_v1 | not DE   | not DE   | not DE   | not DE  |
| EVM0009194 | LG4 | hypothetical protein CICLE_v1 | not DE   | not DE   | 1.057068 | #####   |
| EVM0006604 | LG4 | hypothetical protein CICLE_v1 | not DE   | not DE   | not DE   | not DE  |
| EVM0020555 | LG4 | hypothetical protein CICLE_v1 | not DE   | not DE   | not DE   | not DE  |
| EVM0021407 | LG4 | hypothetical protein CICLE_v1 | not DE   | not DE   | -1.20872 | 0.02978 |
| EVM0020681 | LG4 | hypothetical protein CICLE_v1 | not DE   | not DE   | -3.33983 | #####   |
| EVM0010965 | LG4 | hypothetical protein CICLE_v1 | 1.532568 | 0.001823 | not DE   | not DE  |
| EVM0002856 | LG4 | hypothetical protein CICLE_v1 | -1.20676 | 0.015132 | not DE   | not DE  |
| EVM0015278 | LG4 | hypothetical protein CICLE_v1 | not DE   | not DE   | not DE   | not DE  |
| EVM0012103 | LG4 | hypothetical protein CICLE_v1 | not DE   | not DE   | not DE   | not DE  |
| EVM0023220 | LG4 | hypothetical protein CICLE_v1 | not DE   | not DE   | not DE   | not DE  |
| EVM0005563 | LG4 | hypothetical protein CICLE_v1 | not DE   | not DE   | 1.692114 | 0.00137 |
| EVM0015823 | LG4 | hypothetical protein CICLE_v1 | not DE   | not DE   | not DE   | not DE  |
| EVM0019802 | LG4 | hypothetical protein CICLE_v1 | not DE   | not DE   | not DE   | not DE  |
| EVM0022314 | LG4 | hypothetical protein CICLE_v1 | not DE   | not DE   | not DE   | not DE  |
| EVM0008830 | LG4 | hypothetical protein CICLE_v1 | not DE   | not DE   | not DE   | not DE  |
| EVM0005197 | LG4 | hypothetical protein CICLE_v1 | not DE   | not DE   | not DE   | not DE  |
| EVM0014249 | LG4 | hypothetical protein CICLE_v1 | not DE   | not DE   | not DE   | not DE  |
| EVM0014960 | LG4 | hypothetical protein CICLE_v1 | not DE   | not DE   | not DE   | not DE  |
| EVM0002251 | LG4 | hypothetical protein CICLE_v1 | not DE   | not DE   | 1.774483 | 0.00276 |
| EVM0007148 | LG4 | hypothetical protein CICLE_v1 | not DE   | not DE   | not DE   | not DE  |
| EVM0019234 | LG4 | hypothetical protein CICLE_v1 | not DE   | not DE   | not DE   | not DE  |
| EVM0024089 | LG4 | hypothetical protein CICLE_v1 | not DE   | not DE   | not DE   | not DE  |
| EVM0005266 | LG4 | hypothetical protein CICLE_v1 | not DE   | not DE   | not DE   | not DE  |
| EVM0013727 | LG4 | hypothetical protein CICLE_v1 | 1.080017 | 0.042186 | not DE   | not DE  |
| EVM0016269 | LG4 | hypothetical protein CICLE_v1 | not DE   | not DE   | not DE   | not DE  |
| EVM0003929 | LG4 | hypothetical protein CICLE_v1 | not DE   | not DE   | not DE   | not DE  |
| EVM0013557 | LG4 | hypothetical protein CICLE_v1 | not DE   | not DE   | not DE   | not DE  |
| EVM0022653 | LG4 | hypothetical protein CICLE_v1 | 2.240904 | 0.002574 | 1.050919 | 0.04126 |
| EVM0004573 | LG4 | hypothetical protein CICLE_v1 | not DE   | not DE   | not DE   | not DE  |
| EVM0002447 | LG4 | hypothetical protein CICLE_v1 | not DE   | not DE   | not DE   | not DE  |
| EVM0011872 | LG4 | hypothetical protein CICLE_v1 | not DE   | not DE   | not DE   | not DE  |
| EVM0023187 | LG4 | hypothetical protein CICLE_v1 | not DE   | not DE   | not DE   | not DE  |
| EVM0016647 | LG4 | hypothetical protein CICLE_v1 | not DE   | not DE   | not DE   | not DE  |
| EVM0018787 | LG4 | hypothetical protein CICLE_v1 | not DE   | not DE   | not DE   | not DE  |
| EVM0019408 | LG4 | hypothetical protein CICLE_v1 | not DE   | not DE   | not DE   | not DE  |
| EVM0003465 | LG4 | hypothetical protein CICLE_v1 | not DE   | not DE   | not DE   | not DE  |
| EVM0001223 | LG4 | hypothetical protein CICLE_v1 | not DE   | not DE   | not DE   | not DE  |
| EVM0007677 | LG4 | hypothetical protein CICLE_v1 | not DE   | not DE   | not DE   | not DE  |

|            |     |                               |          |          |          |         |
|------------|-----|-------------------------------|----------|----------|----------|---------|
| EVM0008732 | LG4 | hypothetical protein CICLE_v1 | 1.158076 | 0.000289 | not DE   | not DE  |
| EVM0003000 | LG4 | hypothetical protein CICLE_v1 | not DE   | not DE   | not DE   | not DE  |
| EVM0022116 | LG4 | hypothetical protein CICLE_v1 | not DE   | not DE   | not DE   | not DE  |
| EVM0017627 | LG4 | hypothetical protein CICLE_v1 | not DE   | not DE   | not DE   | not DE  |
| EVM0008774 | LG4 | hypothetical protein CICLE_v1 | not DE   | not DE   | not DE   | not DE  |
| EVM0018631 | LG4 | hypothetical protein CICLE_v1 | not DE   | not DE   | not DE   | not DE  |
| EVM0014083 | LG4 | hypothetical protein CICLE_v1 | not DE   | not DE   | not DE   | not DE  |
| EVM0012171 | LG4 | hypothetical protein CICLE_v1 | not DE   | not DE   | not DE   | not DE  |
| EVM0020705 | LG4 | hypothetical protein CICLE_v1 | not DE   | not DE   | not DE   | not DE  |
| EVM0020790 | LG4 | hypothetical protein CICLE_v1 | not DE   | not DE   | not DE   | not DE  |
| EVM0005393 | LG4 | hypothetical protein CICLE_v1 | not DE   | not DE   | not DE   | not DE  |
| EVM0016560 | LG4 | hypothetical protein CICLE_v1 | not DE   | not DE   | not DE   | not DE  |
| EVM0020574 | LG4 | hypothetical protein CICLE_v1 | not DE   | not DE   | not DE   | not DE  |
| EVM0009686 | LG4 | hypothetical protein CICLE_v1 | not DE   | not DE   | not DE   | not DE  |
| EVM0004050 | LG4 | hypothetical protein CICLE_v1 | not DE   | not DE   | not DE   | not DE  |
| EVM0018030 | LG4 | hypothetical protein CICLE_v1 | not DE   | not DE   | not DE   | not DE  |
| EVM0018285 | LG4 | hypothetical protein CICLE_v1 | not DE   | not DE   | not DE   | not DE  |
| EVM0009690 | LG4 | hypothetical protein CICLE_v1 | not DE   | not DE   | not DE   | not DE  |
| EVM0009239 | LG4 | hypothetical protein CICLE_v1 | not DE   | not DE   | not DE   | not DE  |
| EVM0013196 | LG4 | hypothetical protein CICLE_v1 | not DE   | not DE   | not DE   | not DE  |
| EVM0004915 | LG4 | hypothetical protein CICLE_v1 | not DE   | not DE   | not DE   | not DE  |
| EVM0021094 | LG4 | hypothetical protein CICLE_v1 | not DE   | not DE   | not DE   | not DE  |
| EVM0003738 | LG4 | hypothetical protein CICLE_v1 | not DE   | not DE   | not DE   | not DE  |
| EVM0015944 | LG4 | hypothetical protein CICLE_v1 | not DE   | not DE   | not DE   | not DE  |
| EVM0006912 | LG4 | hypothetical protein CICLE_v1 | not DE   | not DE   | not DE   | not DE  |
| EVM0011813 | LG4 | hypothetical protein CICLE_v1 | not DE   | not DE   | not DE   | not DE  |
| EVM0022711 | LG4 | hypothetical protein CICLE_v1 | not DE   | not DE   | not DE   | not DE  |
| EVM0021073 | LG4 | hypothetical protein CICLE_v1 | not DE   | not DE   | not DE   | not DE  |
| EVM0008980 | LG4 | hypothetical protein CICLE_v1 | not DE   | not DE   | not DE   | not DE  |
| EVM0014874 | LG4 | hypothetical protein CICLE_v1 | not DE   | not DE   | not DE   | not DE  |
| EVM0017023 | LG4 | hypothetical protein CICLE_v1 | not DE   | not DE   | not DE   | not DE  |
| EVM0001236 | LG4 | hypothetical protein CICLE_v1 | not DE   | not DE   | not DE   | not DE  |
| EVM0001900 | LG4 | hypothetical protein CICLE_v1 | not DE   | not DE   | not DE   | not DE  |
| EVM0011101 | LG4 | hypothetical protein CICLE_v1 | not DE   | not DE   | not DE   | not DE  |
| EVM0013006 | LG4 | hypothetical protein CICLE_v1 | not DE   | not DE   | not DE   | not DE  |
| EVM0015731 | LG4 | hypothetical protein CICLE_v1 | not DE   | not DE   | not DE   | not DE  |
| EVM0003460 | LG4 | hypothetical protein CICLE_v1 | -2.37381 | 3.35E-22 | -1.00052 | 0.00528 |
| EVM0016247 | LG4 | hypothetical protein CICLE_v1 | not DE   | not DE   | not DE   | not DE  |
| EVM0021129 | LG4 | hypothetical protein CICLE_v1 | 3.687902 | 5.42E-06 | not DE   | not DE  |
| EVM0007217 | LG4 | hypothetical protein CICLE_v1 | not DE   | not DE   | not DE   | not DE  |
| EVM0022871 | LG4 | hypothetical protein CICLE_v1 | not DE   | not DE   | not DE   | not DE  |
| EVM0003317 | LG4 | hypothetical protein CICLE_v1 | not DE   | not DE   | not DE   | not DE  |
| EVM0007463 | LG4 | hypothetical protein CICLE_v1 | not DE   | not DE   | not DE   | not DE  |
| EVM0005014 | LG4 | hypothetical protein CICLE_v1 | not DE   | not DE   | not DE   | not DE  |
| EVM0012119 | LG4 | hypothetical protein CICLE_v1 | not DE   | not DE   | not DE   | not DE  |
| EVM0004633 | LG4 | hypothetical protein CICLE_v1 | not DE   | not DE   | not DE   | not DE  |
| EVM0021883 | LG4 | hypothetical protein CICLE_v1 | not DE   | not DE   | not DE   | not DE  |
| EVM0020262 | LG4 | hypothetical protein CICLE_v1 | not DE   | not DE   | not DE   | not DE  |
| EVM0004949 | LG4 | hypothetical protein CICLE_v1 | not DE   | not DE   | not DE   | not DE  |
| EVM0022810 | LG4 | hypothetical protein CICLE_v1 | not DE   | not DE   | -1.02662 | 0.03259 |
| EVM0009199 | LG4 | hypothetical protein CICLE_v1 | not DE   | not DE   | not DE   | not DE  |
| EVM0003998 | LG4 | hypothetical protein CICLE_v1 | not DE   | not DE   | not DE   | not DE  |
| EVM0008859 | LG4 | hypothetical protein CICLE_v1 | not DE   | not DE   | -1.14913 | #####   |
| EVM0014787 | LG4 | hypothetical protein CICLE_v1 | not DE   | not DE   | not DE   | not DE  |

|            |     |                               |          |          |          |        |
|------------|-----|-------------------------------|----------|----------|----------|--------|
| EVM0001666 | LG4 | hypothetical protein CICLE_v1 | not DE   | not DE   | not DE   | not DE |
| EVM0013728 | LG4 | hypothetical protein CICLE_v1 | not DE   | not DE   | not DE   | not DE |
| EVM0001551 | LG4 | hypothetical protein CICLE_v1 | not DE   | not DE   | not DE   | not DE |
| EVM0009104 | LG4 | hypothetical protein CICLE_v1 | not DE   | not DE   | not DE   | not DE |
| EVM0013269 | LG4 | hypothetical protein CICLE_v1 | not DE   | not DE   | not DE   | not DE |
| EVM0015588 | LG4 | hypothetical protein CICLE_v1 | not DE   | not DE   | not DE   | not DE |
| EVM0003896 | LG4 | hypothetical protein CICLE_v1 | not DE   | not DE   | not DE   | not DE |
| EVM0011725 | LG4 | hypothetical protein CICLE_v1 | not DE   | not DE   | not DE   | not DE |
| EVM0000342 | LG4 | hypothetical protein CICLE_v1 | not DE   | not DE   | not DE   | not DE |
| EVM0007597 | LG4 | hypothetical protein CICLE_v1 | not DE   | not DE   | not DE   | not DE |
| EVM0013825 | LG4 | hypothetical protein CICLE_v1 | -1.40449 | 0.008229 | not DE   | not DE |
| EVM0017874 | LG4 | hypothetical protein CICLE_v1 | not DE   | not DE   | not DE   | not DE |
| EVM0012311 | LG4 | hypothetical protein CICLE_v1 | not DE   | not DE   | not DE   | not DE |
| EVM0013040 | LG4 | hypothetical protein CICLE_v1 | not DE   | not DE   | not DE   | not DE |
| EVM0012145 | LG4 | hypothetical protein CICLE_v1 | -3.03506 | 1.27E-05 | not DE   | not DE |
| EVM0022328 | LG4 | hypothetical protein CICLE_v1 | not DE   | not DE   | not DE   | not DE |
| EVM0021815 | LG4 | hypothetical protein CICLE_v1 | not DE   | not DE   | not DE   | not DE |
| EVM0023244 | LG4 | hypothetical protein CICLE_v1 | not DE   | not DE   | not DE   | not DE |
| EVM0016274 | LG4 | hypothetical protein CICLE_v1 | not DE   | not DE   | not DE   | not DE |
| EVM0022356 | LG4 | hypothetical protein CICLE_v1 | not DE   | not DE   | not DE   | not DE |
| EVM0024256 | LG4 | hypothetical protein CICLE_v1 | not DE   | not DE   | not DE   | not DE |
| EVM0012167 | LG4 | hypothetical protein CICLE_v1 | not DE   | not DE   | not DE   | not DE |
| EVM0008933 | LG4 | hypothetical protein CICLE_v1 | not DE   | not DE   | not DE   | not DE |
| EVM0002588 | LG4 | hypothetical protein CICLE_v1 | not DE   | not DE   | not DE   | not DE |
| EVM0022574 | LG4 | hypothetical protein CICLE_v1 | not DE   | not DE   | not DE   | not DE |
| EVM0019515 | LG4 | hypothetical protein CICLE_v1 | 1.842585 | 0.020355 | not DE   | not DE |
| EVM0001227 | LG4 | hypothetical protein CICLE_v1 | not DE   | not DE   | not DE   | not DE |
| EVM0011908 | LG4 | hypothetical protein CICLE_v1 | not DE   | not DE   | not DE   | not DE |
| EVM0000908 | LG4 | hypothetical protein CICLE_v1 | not DE   | not DE   | not DE   | not DE |
| EVM0010149 | LG4 | hypothetical protein CICLE_v1 | not DE   | not DE   | not DE   | not DE |
| EVM0024545 | LG4 | hypothetical protein CICLE_v1 | not DE   | not DE   | not DE   | not DE |
| EVM0023348 | LG4 | hypothetical protein CICLE_v1 | not DE   | not DE   | not DE   | not DE |
| EVM0016326 | LG4 | hypothetical protein CICLE_v1 | not DE   | not DE   | not DE   | not DE |
| EVM0020666 | LG4 | hypothetical protein CICLE_v1 | not DE   | not DE   | not DE   | not DE |
| EVM0001769 | LG4 | hypothetical protein CICLE_v1 | not DE   | not DE   | not DE   | not DE |
| EVM0018845 | LG4 | hypothetical protein CICLE_v1 | not DE   | not DE   | not DE   | not DE |
| EVM0006918 | LG4 | hypothetical protein CICLE_v1 | not DE   | not DE   | not DE   | not DE |
| EVM0013901 | LG4 | hypothetical protein CICLE_v1 | not DE   | not DE   | not DE   | not DE |
| EVM0014627 | LG4 | hypothetical protein CICLE_v1 | not DE   | not DE   | not DE   | not DE |
| EVM0014889 | LG4 | hypothetical protein CICLE_v1 | not DE   | not DE   | not DE   | not DE |
| EVM0021434 | LG4 | hypothetical protein CICLE_v1 | not DE   | not DE   | not DE   | not DE |
| EVM0022039 | LG4 | hypothetical protein CICLE_v1 | not DE   | not DE   | not DE   | not DE |
| EVM0016188 | LG4 | hypothetical protein CICLE_v1 | not DE   | not DE   | not DE   | not DE |
| EVM0019600 | LG4 | hypothetical protein CICLE_v1 | not DE   | not DE   | not DE   | not DE |
| EVM0022964 | LG4 | hypothetical protein CICLE_v1 | not DE   | not DE   | not DE   | not DE |
| EVM0012895 | LG4 | hypothetical protein CICLE_v1 | not DE   | not DE   | not DE   | not DE |
| EVM0001082 | LG4 | hypothetical protein CISIN_1g | not DE   | not DE   | -1.17955 | #####  |
| EVM0003430 | LG4 | hypothetical protein CISIN_1g | not DE   | not DE   | not DE   | not DE |
| EVM0021337 | LG4 | hypothetical protein CISIN_1g | not DE   | not DE   | not DE   | not DE |
| EVM0015849 | LG4 | hypothetical protein CISIN_1g | not DE   | not DE   | not DE   | not DE |
| EVM0014839 | LG4 | hypothetical protein CISIN_1g | not DE   | not DE   | not DE   | not DE |
| EVM0013104 | LG4 | hypothetical protein CISIN_1g | not DE   | not DE   | not DE   | not DE |
| EVM0016792 | LG4 | hypothetical protein CISIN_1g | not DE   | not DE   | not DE   | not DE |
| EVM0016366 | LG4 | hypothetical protein CISIN_1g | not DE   | not DE   | not DE   | not DE |

|            |     |                               |          |          |          |         |
|------------|-----|-------------------------------|----------|----------|----------|---------|
| EVM0012400 | LG4 | hypothetical protein CISIN_1g | not DE   | not DE   | not DE   | not DE  |
| EVM0018393 | LG4 | hypothetical protein CISIN_1g | -3.3402  | 0.000281 | not DE   | not DE  |
| EVM0000422 | LG4 | hypothetical protein CISIN_1g | not DE   | not DE   | not DE   | not DE  |
| EVM0007832 | LG4 | hypothetical protein CISIN_1g | not DE   | not DE   | not DE   | not DE  |
| EVM0000758 | LG4 | hypothetical protein CISIN_1g | not DE   | not DE   | not DE   | not DE  |
| EVM0002086 | LG4 | hypothetical protein CISIN_1g | not DE   | not DE   | not DE   | not DE  |
| EVM0004907 | LG4 | hypothetical protein CISIN_1g | not DE   | not DE   | not DE   | not DE  |
| EVM0008651 | LG4 | hypothetical protein CISIN_1g | not DE   | not DE   | not DE   | not DE  |
| EVM0007745 | LG4 | hypothetical protein CISIN_1g | not DE   | not DE   | not DE   | not DE  |
| EVM0008108 | LG4 | hypothetical protein CISIN_1g | not DE   | not DE   | not DE   | not DE  |
| EVM0015362 | LG4 | hypothetical protein CISIN_1g | not DE   | not DE   | not DE   | not DE  |
| EVM0019385 | LG4 | hypothetical protein CISIN_1g | not DE   | not DE   | not DE   | not DE  |
| EVM0019971 | LG4 | hypothetical protein CISIN_1g | not DE   | not DE   | not DE   | not DE  |
| EVM0023701 | LG4 | hypothetical protein CISIN_1g | not DE   | not DE   | not DE   | not DE  |
| EVM0019950 | LG4 | hypothetical protein CISIN_1g | not DE   | not DE   | not DE   | not DE  |
| EVM0014768 | LG4 | hypothetical protein CISIN_1g | not DE   | not DE   | not DE   | not DE  |
| EVM0019854 | LG4 | hypothetical protein CISIN_1g | not DE   | not DE   | not DE   | not DE  |
| EVM0008521 | LG4 | hypothetical protein CISIN_1g | not DE   | not DE   | not DE   | not DE  |
| EVM0021589 | LG4 | hypothetical protein CISIN_1g | not DE   | not DE   | not DE   | not DE  |
| EVM0012890 | LG4 | hypothetical protein CISIN_1g | not DE   | not DE   | not DE   | not DE  |
| EVM0017051 | LG4 | hypothetical protein CISIN_1g | not DE   | not DE   | not DE   | not DE  |
| EVM0001107 | LG4 | hypothetical protein CISIN_1g | -2.65955 | 0.036732 | not DE   | not DE  |
| EVM0008131 | LG4 | hypothetical protein CISIN_1g | not DE   | not DE   | not DE   | not DE  |
| EVM0008824 | LG4 | hypothetical protein CISIN_1g | not DE   | not DE   | not DE   | not DE  |
| EVM0001087 | LG4 | hypothetical protein CISIN_1g | not DE   | not DE   | not DE   | not DE  |
| EVM0011179 | LG4 | hypothetical protein CISIN_1g | not DE   | not DE   | not DE   | not DE  |
| EVM0004606 | LG4 | hypothetical protein CISIN_1g | not DE   | not DE   | 1.583361 | 0.01513 |
| EVM0008841 | LG4 | hypothetical protein CISIN_1g | not DE   | not DE   | not DE   | not DE  |
| EVM0012516 | LG4 | hypothetical protein CISIN_1g | not DE   | not DE   | not DE   | not DE  |
| EVM0019206 | LG4 | hypothetical protein CISIN_1g | 4.642555 | 0.038468 | not DE   | not DE  |
| EVM0016572 | LG4 | hypothetical protein CISIN_1g | not DE   | not DE   | not DE   | not DE  |
| EVM0017665 | LG4 | hypothetical protein CISIN_1g | not DE   | not DE   | not DE   | not DE  |
| EVM0005459 | LG4 | hypothetical protein CISIN_1g | not DE   | not DE   | not DE   | not DE  |
| EVM0002166 | LG4 | hypothetical protein CISIN_1g | not DE   | not DE   | not DE   | not DE  |
| EVM0024349 | LG4 | hypothetical protein CISIN_1g | not DE   | not DE   | not DE   | not DE  |
| EVM0001140 | LG4 | hypothetical protein CISIN_1g | not DE   | not DE   | not DE   | not DE  |
| EVM0004848 | LG4 | hypothetical protein CISIN_1g | not DE   | not DE   | not DE   | not DE  |
| EVM0010760 | LG4 | hypothetical protein CISIN_1g | not DE   | not DE   | not DE   | not DE  |
| EVM0012785 | LG4 | hypothetical protein CISIN_1g | not DE   | not DE   | not DE   | not DE  |
| EVM0018158 | LG4 | hypothetical protein CISIN_1g | not DE   | not DE   | not DE   | not DE  |
| EVM0008427 | LG4 | hypothetical protein CISIN_1g | 2.747509 | 0.008072 | not DE   | not DE  |
| EVM0011605 | LG4 | hypothetical protein CISIN_1g | not DE   | not DE   | not DE   | not DE  |
| EVM0011167 | LG4 | hypothetical protein CISIN_1g | not DE   | not DE   | not DE   | not DE  |
| EVM0023611 | LG4 | hypothetical protein CISIN_1g | not DE   | not DE   | not DE   | not DE  |
| EVM0004072 | LG4 | hypothetical protein CISIN_1g | not DE   | not DE   | not DE   | not DE  |
| EVM0006205 | LG4 | hypothetical protein CISIN_1g | not DE   | not DE   | not DE   | not DE  |
| EVM0014121 | LG4 | hypothetical protein CISIN_1g | not DE   | not DE   | not DE   | not DE  |
| EVM0019369 | LG4 | hypothetical protein CISIN_1g | not DE   | not DE   | not DE   | not DE  |
| EVM0000542 | LG4 | hypothetical protein CISIN_1g | not DE   | not DE   | not DE   | not DE  |
| EVM0016857 | LG4 | hypothetical protein CISIN_1g | not DE   | not DE   | not DE   | not DE  |
| EVM0008011 | LG4 | hypothetical protein CISIN_1g | not DE   | not DE   | not DE   | not DE  |
| EVM0000652 | LG4 | hypothetical protein CISIN_1g | not DE   | not DE   | not DE   | not DE  |
| EVM0005344 | LG4 | hypothetical protein CISIN_1g | not DE   | not DE   | not DE   | not DE  |
| EVM0016429 | LG4 | hypothetical protein CISIN_1g | not DE   | not DE   | not DE   | not DE  |



|            |     |                               |          |          |          |         |
|------------|-----|-------------------------------|----------|----------|----------|---------|
| EVM0013849 | LG4 | hypothetical protein CISIN_1g | not DE   | not DE   | not DE   | not DE  |
| EVM0007146 | LG4 | hypothetical protein CISIN_1g | not DE   | not DE   | not DE   | not DE  |
| EVM0006052 | LG4 | hypothetical protein CISIN_1g | not DE   | not DE   | not DE   | not DE  |
| EVM0024124 | LG4 | hypothetical protein CISIN_1g | not DE   | not DE   | not DE   | not DE  |
| EVM0022429 | LG4 | hypothetical protein CISIN_1g | not DE   | not DE   | not DE   | not DE  |
| EVM0011719 | LG4 | hypothetical protein CISIN_1g | not DE   | not DE   | not DE   | not DE  |
| EVM0020943 | LG4 | hypothetical protein CISIN_1g | not DE   | not DE   | not DE   | not DE  |
| EVM0009282 | LG4 | hypothetical protein CISIN_1g | not DE   | not DE   | not DE   | not DE  |
| EVM0009015 | LG4 | hypothetical protein CISIN_1g | not DE   | not DE   | not DE   | not DE  |
| EVM0000610 | LG4 | hypothetical protein CISIN_1g | not DE   | not DE   | not DE   | not DE  |
| EVM0019253 | LG4 | hypothetical protein CISIN_1g | not DE   | not DE   | not DE   | not DE  |
| EVM0018024 | LG4 | hypothetical protein CISIN_1g | not DE   | not DE   | not DE   | not DE  |
| EVM0015791 | LG4 | hypothetical protein CISIN_1g | not DE   | not DE   | not DE   | not DE  |
| EVM0003812 | LG4 | hypothetical protein CISIN_1g | not DE   | not DE   | not DE   | not DE  |
| EVM0004827 | LG4 | hypothetical protein CISIN_1g | not DE   | not DE   | not DE   | not DE  |
| EVM0007650 | LG4 | hypothetical protein CISIN_1g | not DE   | not DE   | not DE   | not DE  |
| EVM0018680 | LG4 | hypothetical protein CISIN_1g | not DE   | not DE   | not DE   | not DE  |
| EVM0001065 | LG4 | hypothetical protein CISIN_1g | not DE   | not DE   | not DE   | not DE  |
| EVM0003889 | LG4 | hypothetical protein CISIN_1g | not DE   | not DE   | not DE   | not DE  |
| EVM0020254 | LG4 | hypothetical protein CISIN_1g | -2.09759 | 0.00935  | not DE   | not DE  |
| EVM0021553 | LG4 | hypothetical protein CISIN_1g | not DE   | not DE   | not DE   | not DE  |
| EVM0015698 | LG4 | hypothetical protein CISIN_1g | not DE   | not DE   | not DE   | not DE  |
| EVM0017601 | LG4 | hypothetical protein CISIN_1g | not DE   | not DE   | not DE   | not DE  |
| EVM0018405 | LG4 | hypothetical protein CISIN_1g | not DE   | not DE   | not DE   | not DE  |
| EVM0000170 | LG4 | hypothetical protein CISIN_1g | not DE   | not DE   | not DE   | not DE  |
| EVM0013640 | LG4 | hypothetical protein CISIN_1g | not DE   | not DE   | not DE   | not DE  |
| EVM0018536 | LG4 | hypothetical protein CISIN_1g | -3.13068 | 0.048913 | not DE   | not DE  |
| EVM0004326 | LG4 | hypothetical protein CISIN_1g | not DE   | not DE   | not DE   | not DE  |
| EVM0020571 | LG4 | hypothetical protein CISIN_1g | not DE   | not DE   | not DE   | not DE  |
| EVM0001220 | LG4 | hypothetical protein CISIN_1g | not DE   | not DE   | not DE   | not DE  |
| EVM0021273 | LG4 | hypothetical protein CISIN_1g | not DE   | not DE   | not DE   | not DE  |
| EVM0019048 | LG4 | hypothetical protein CISIN_1g | not DE   | not DE   | not DE   | not DE  |
| EVM0017446 | LG4 | hypothetical protein CISIN_1g | not DE   | not DE   | not DE   | not DE  |
| EVM0009383 | LG4 | hypothetical protein CISIN_1g | 3.407096 | 0.001365 | not DE   | not DE  |
| EVM0011700 | LG4 | hypothetical protein CISIN_1g | not DE   | not DE   | not DE   | not DE  |
| EVM0014881 | LG4 | hypothetical protein CISIN_1g | not DE   | not DE   | not DE   | not DE  |
| EVM0007039 | LG4 | hypothetical protein CISIN_1g | not DE   | not DE   | not DE   | not DE  |
| EVM0007291 | LG4 | hypothetical protein CISIN_1g | not DE   | not DE   | not DE   | not DE  |
| EVM0009180 | LG4 | hypothetical protein CISIN_1g | not DE   | not DE   | not DE   | not DE  |
| EVM0017822 | LG4 | hypothetical protein CISIN_1g | not DE   | not DE   | not DE   | not DE  |
| EVM0021394 | LG4 | hypothetical protein CISIN_1g | not DE   | not DE   | not DE   | not DE  |
| EVM0004499 | LG4 | hypothetical protein CISIN_1g | not DE   | not DE   | not DE   | not DE  |
| EVM0016830 | LG4 | hypothetical protein CISIN_1g | not DE   | not DE   | not DE   | not DE  |
| EVM0004262 | LG4 | hypothetical protein Csa_4G62 | not DE   | not DE   | not DE   | not DE  |
| EVM0002318 | LG4 | hypothetical protein F383_148 | not DE   | not DE   | 1.722126 | 0.0129  |
| EVM0015224 | LG4 | hypothetical protein F383_232 | not DE   | not DE   | not DE   | not DE  |
| EVM0013633 | LG4 | hypothetical protein JCGZ_038 | not DE   | not DE   | not DE   | not DE  |
| EVM0020811 | LG4 | hypothetical protein JCGZ_039 | not DE   | not DE   | not DE   | not DE  |
| EVM0010948 | LG4 | hypothetical protein JCGZ_042 | not DE   | not DE   | not DE   | not DE  |
| EVM0014762 | LG4 | hypothetical protein JCGZ_042 | not DE   | not DE   | not DE   | not DE  |
| EVM0013951 | LG4 | hypothetical protein JCGZ_043 | not DE   | not DE   | -2.37949 | 0.00465 |
| EVM0019596 | LG4 | hypothetical protein JCGZ_043 | not DE   | not DE   | not DE   | not DE  |
| EVM0005989 | LG4 | hypothetical protein JCGZ_043 | not DE   | not DE   | not DE   | not DE  |
| EVM0016087 | LG4 | hypothetical protein JCGZ_043 | not DE   | not DE   | not DE   | not DE  |

|            |     |                               |          |          |          |        |
|------------|-----|-------------------------------|----------|----------|----------|--------|
| EVM0022200 | LG4 | hypothetical protein JCGZ_043 | not DE   | not DE   | not DE   | not DE |
| EVM0008469 | LG4 | hypothetical protein JCGZ_044 | not DE   | not DE   | not DE   | not DE |
| EVM0017942 | LG4 | hypothetical protein JCGZ_045 | not DE   | not DE   | not DE   | not DE |
| EVM0015400 | LG4 | hypothetical protein JCGZ_060 | not DE   | not DE   | not DE   | not DE |
| EVM0021875 | LG4 | hypothetical protein JCGZ_060 | not DE   | not DE   | not DE   | not DE |
| EVM0017328 | LG4 | hypothetical protein JCGZ_079 | not DE   | not DE   | not DE   | not DE |
| EVM0007892 | LG4 | hypothetical protein JCGZ_079 | not DE   | not DE   | not DE   | not DE |
| EVM0005634 | LG4 | hypothetical protein JCGZ_080 | not DE   | not DE   | -1.71973 | 0.0432 |
| EVM0019251 | LG4 | hypothetical protein JCGZ_080 | not DE   | not DE   | not DE   | not DE |
| EVM0004631 | LG4 | hypothetical protein JCGZ_080 | not DE   | not DE   | not DE   | not DE |
| EVM0008392 | LG4 | hypothetical protein JCGZ_080 | not DE   | not DE   | not DE   | not DE |
| EVM0021530 | LG4 | hypothetical protein JCGZ_081 | 4.160858 | 0.006626 | not DE   | not DE |
| EVM0002984 | LG4 | hypothetical protein JCGZ_081 | not DE   | not DE   | not DE   | not DE |
| EVM0007319 | LG4 | hypothetical protein JCGZ_081 | not DE   | not DE   | not DE   | not DE |
| EVM0017661 | LG4 | hypothetical protein JCGZ_081 | not DE   | not DE   | not DE   | not DE |
| EVM0014863 | LG4 | hypothetical protein JCGZ_081 | not DE   | not DE   | not DE   | not DE |
| EVM0015660 | LG4 | hypothetical protein JCGZ_082 | not DE   | not DE   | not DE   | not DE |
| EVM0013162 | LG4 | hypothetical protein JCGZ_082 | not DE   | not DE   | not DE   | not DE |
| EVM0010341 | LG4 | hypothetical protein JCGZ_082 | -1.8401  | 0.002184 | not DE   | not DE |
| EVM0020942 | LG4 | hypothetical protein JCGZ_083 | not DE   | not DE   | not DE   | not DE |
| EVM0002971 | LG4 | hypothetical protein JCGZ_094 | not DE   | not DE   | not DE   | not DE |
| EVM0008036 | LG4 | hypothetical protein JCGZ_100 | not DE   | not DE   | not DE   | not DE |
| EVM0017901 | LG4 | hypothetical protein JCGZ_119 | 4.104322 | 2.85E-07 | not DE   | not DE |
| EVM0006177 | LG4 | hypothetical protein JCGZ_120 | not DE   | not DE   | not DE   | not DE |
| EVM0012070 | LG4 | hypothetical protein JCGZ_120 | not DE   | not DE   | not DE   | not DE |
| EVM0002458 | LG4 | hypothetical protein JCGZ_121 | not DE   | not DE   | not DE   | not DE |
| EVM0023402 | LG4 | hypothetical protein JCGZ_121 | not DE   | not DE   | not DE   | not DE |
| EVM0009070 | LG4 | hypothetical protein JCGZ_121 | not DE   | not DE   | not DE   | not DE |
| EVM0000257 | LG4 | hypothetical protein JCGZ_130 | not DE   | not DE   | not DE   | not DE |
| EVM0000464 | LG4 | hypothetical protein JCGZ_130 | not DE   | not DE   | not DE   | not DE |
| EVM0009054 | LG4 | hypothetical protein JCGZ_137 | not DE   | not DE   | not DE   | not DE |
| EVM0009663 | LG4 | hypothetical protein JCGZ_137 | not DE   | not DE   | not DE   | not DE |
| EVM0002375 | LG4 | hypothetical protein JCGZ_141 | not DE   | not DE   | not DE   | not DE |
| EVM0013514 | LG4 | hypothetical protein JCGZ_157 | not DE   | not DE   | not DE   | not DE |
| EVM0021358 | LG4 | hypothetical protein JCGZ_157 | not DE   | not DE   | not DE   | not DE |
| EVM0015345 | LG4 | hypothetical protein JCGZ_158 | not DE   | not DE   | not DE   | not DE |
| EVM0018064 | LG4 | hypothetical protein JCGZ_158 | not DE   | not DE   | not DE   | not DE |
| EVM0009642 | LG4 | hypothetical protein JCGZ_158 | not DE   | not DE   | not DE   | not DE |
| EVM0013809 | LG4 | hypothetical protein JCGZ_158 | not DE   | not DE   | not DE   | not DE |
| EVM0021339 | LG4 | hypothetical protein JCGZ_158 | not DE   | not DE   | not DE   | not DE |
| EVM0008424 | LG4 | hypothetical protein JCGZ_159 | not DE   | not DE   | not DE   | not DE |
| EVM0007755 | LG4 | hypothetical protein JCGZ_159 | not DE   | not DE   | not DE   | not DE |
| EVM0007141 | LG4 | hypothetical protein JCGZ_160 | not DE   | not DE   | not DE   | not DE |
| EVM0024590 | LG4 | hypothetical protein JCGZ_160 | not DE   | not DE   | not DE   | not DE |
| EVM0015074 | LG4 | hypothetical protein JCGZ_160 | not DE   | not DE   | not DE   | not DE |
| EVM0000583 | LG4 | hypothetical protein JCGZ_160 | not DE   | not DE   | not DE   | not DE |
| EVM0009412 | LG4 | hypothetical protein JCGZ_160 | not DE   | not DE   | not DE   | not DE |
| EVM0005132 | LG4 | hypothetical protein JCGZ_160 | not DE   | not DE   | not DE   | not DE |
| EVM0014617 | LG4 | hypothetical protein JCGZ_160 | not DE   | not DE   | not DE   | not DE |
| EVM0016229 | LG4 | hypothetical protein JCGZ_160 | not DE   | not DE   | not DE   | not DE |
| EVM0010456 | LG4 | hypothetical protein JCGZ_160 | 2.244532 | 0.000516 | 2.296139 | #####  |
| EVM0003212 | LG4 | hypothetical protein JCGZ_161 | not DE   | not DE   | not DE   | not DE |
| EVM0024360 | LG4 | hypothetical protein JCGZ_161 | not DE   | not DE   | not DE   | not DE |
| EVM0014102 | LG4 | hypothetical protein JCGZ_172 | not DE   | not DE   | not DE   | not DE |



|            |     |                               |          |          |          |         |
|------------|-----|-------------------------------|----------|----------|----------|---------|
| EVM0000866 | LG4 | hypothetical protein JCGZ_248 | not DE   | not DE   | not DE   | not DE  |
| EVM0007518 | LG4 | hypothetical protein JCGZ_251 | not DE   | not DE   | not DE   | not DE  |
| EVM0009590 | LG4 | hypothetical protein L484_002 | not DE   | not DE   | not DE   | not DE  |
| EVM0006714 | LG4 | hypothetical protein L484_025 | -2.05833 | 7.62E-10 | not DE   | not DE  |
| EVM0007718 | LG4 | hypothetical protein MIMGU_mg | not DE   | not DE   | not DE   | not DE  |
| EVM0023984 | LG4 | hypothetical protein MIMGU_mg | not DE   | not DE   | not DE   | not DE  |
| EVM0020141 | LG4 | hypothetical protein MIMGU_mg | not DE   | not DE   | not DE   | not DE  |
| EVM0007255 | LG4 | hypothetical protein MIMGU_mg | not DE   | not DE   | not DE   | not DE  |
| EVM0007112 | LG4 | hypothetical protein POPTR_00 | not DE   | not DE   | not DE   | not DE  |
| EVM0016432 | LG4 | hypothetical protein POPTR_00 | -2.26865 | 0.007105 | not DE   | not DE  |
| EVM0001476 | LG4 | hypothetical protein POPTR_00 | not DE   | not DE   | not DE   | not DE  |
| EVM0007870 | LG4 | hypothetical protein POPTR_00 | not DE   | not DE   | not DE   | not DE  |
| EVM0018329 | LG4 | hypothetical protein POPTR_00 | not DE   | not DE   | 2.73126  | 0.00511 |
| EVM0018688 | LG4 | hypothetical protein POPTR_00 | not DE   | not DE   | not DE   | not DE  |
| EVM0000980 | LG4 | hypothetical protein POPTR_00 | not DE   | not DE   | not DE   | not DE  |
| EVM0002208 | LG4 | hypothetical protein POPTR_00 | -1.24425 | 0.021273 | not DE   | not DE  |
| EVM0007296 | LG4 | hypothetical protein POPTR_00 | not DE   | not DE   | not DE   | not DE  |
| EVM0005013 | LG4 | hypothetical protein POPTR_00 | not DE   | not DE   | not DE   | not DE  |
| EVM0019492 | LG4 | hypothetical protein POPTR_00 | not DE   | not DE   | not DE   | not DE  |
| EVM0024186 | LG4 | hypothetical protein POPTR_00 | not DE   | not DE   | not DE   | not DE  |
| EVM0018859 | LG4 | hypothetical protein POPTR_00 | not DE   | not DE   | not DE   | not DE  |
| EVM0009983 | LG4 | hypothetical protein POPTR_00 | not DE   | not DE   | not DE   | not DE  |
| EVM0004053 | LG4 | hypothetical protein POPTR_00 | not DE   | not DE   | not DE   | not DE  |
| EVM0011359 | LG4 | hypothetical protein POPTR_00 | not DE   | not DE   | not DE   | not DE  |
| EVM0014054 | LG4 | hypothetical protein POPTR_00 | not DE   | not DE   | -3.86257 | 0.00019 |
| EVM0003273 | LG4 | hypothetical protein POPTR_00 | not DE   | not DE   | not DE   | not DE  |
| EVM0003705 | LG4 | hypothetical protein POPTR_00 | not DE   | not DE   | not DE   | not DE  |
| EVM0017511 | LG4 | hypothetical protein POPTR_00 | not DE   | not DE   | not DE   | not DE  |
| EVM0020511 | LG4 | hypothetical protein POPTR_00 | not DE   | not DE   | -1.83816 | #####   |
| EVM0003761 | LG4 | hypothetical protein POPTR_00 | not DE   | not DE   | not DE   | not DE  |
| EVM0019511 | LG4 | hypothetical protein POPTR_00 | not DE   | not DE   | not DE   | not DE  |
| EVM0011074 | LG4 | hypothetical protein POPTR_00 | 1.147721 | 0.00416  | not DE   | not DE  |
| EVM0006246 | LG4 | hypothetical protein POPTR_00 | not DE   | not DE   | not DE   | not DE  |
| EVM0021893 | LG4 | hypothetical protein POPTR_00 | not DE   | not DE   | not DE   | not DE  |
| EVM0020774 | LG4 | hypothetical protein POPTR_00 | not DE   | not DE   | not DE   | not DE  |
| EVM0001117 | LG4 | hypothetical protein POPTR_00 | not DE   | not DE   | not DE   | not DE  |
| EVM0015685 | LG4 | hypothetical protein POPTR_00 | not DE   | not DE   | not DE   | not DE  |
| EVM0012123 | LG4 | hypothetical protein POPTR_00 | not DE   | not DE   | not DE   | not DE  |
| EVM0019794 | LG4 | hypothetical protein POPTR_00 | not DE   | not DE   | not DE   | not DE  |
| EVM0023123 | LG4 | hypothetical protein POPTR_00 | not DE   | not DE   | not DE   | not DE  |
| EVM0017037 | LG4 | hypothetical protein POPTR_00 | not DE   | not DE   | not DE   | not DE  |
| EVM0002002 | LG4 | hypothetical protein POPTR_00 | -4.79554 | 1.28E-07 | not DE   | not DE  |
| EVM0011053 | LG4 | hypothetical protein POPTR_00 | not DE   | not DE   | not DE   | not DE  |
| EVM0013098 | LG4 | hypothetical protein POPTR_00 | not DE   | not DE   | not DE   | not DE  |
| EVM0002260 | LG4 | hypothetical protein POPTR_00 | not DE   | not DE   | not DE   | not DE  |
| EVM0010502 | LG4 | hypothetical protein POPTR_00 | not DE   | not DE   | not DE   | not DE  |
| EVM0005514 | LG4 | hypothetical protein POPTR_00 | not DE   | not DE   | not DE   | not DE  |
| EVM0012487 | LG4 | hypothetical protein POPTR_00 | not DE   | not DE   | not DE   | not DE  |
| EVM0019720 | LG4 | hypothetical protein POPTR_00 | not DE   | not DE   | not DE   | not DE  |
| EVM0010703 | LG4 | hypothetical protein POPTR_00 | not DE   | not DE   | not DE   | not DE  |
| EVM0004706 | LG4 | hypothetical protein POPTR_02 | not DE   | not DE   | not DE   | not DE  |
| EVM0007402 | LG4 | hypothetical protein POPTR_02 | not DE   | not DE   | not DE   | not DE  |
| EVM0007739 | LG4 | hypothetical protein POPTR_02 | not DE   | not DE   | not DE   | not DE  |
| EVM0002800 | LG4 | hypothetical protein POPTR_09 | not DE   | not DE   | not DE   | not DE  |

|            |     |                               |          |          |          |         |
|------------|-----|-------------------------------|----------|----------|----------|---------|
| EVM0003054 | LG4 | hypothetical protein PRUPE_pp | not DE   | not DE   | not DE   | not DE  |
| EVM0010905 | LG4 | hypothetical protein PRUPE_pp | not DE   | not DE   | not DE   | not DE  |
| EVM0011746 | LG4 | hypothetical protein PRUPE_pp | not DE   | not DE   | not DE   | not DE  |
| EVM0024507 | LG4 | hypothetical protein PRUPE_pp | not DE   | not DE   | not DE   | not DE  |
| EVM0016385 | LG4 | hypothetical protein PRUPE_pp | not DE   | not DE   | not DE   | not DE  |
| EVM0016303 | LG4 | hypothetical protein PRUPE_pp | not DE   | not DE   | not DE   | not DE  |
| EVM0003925 | LG4 | hypothetical protein PRUPE_pp | not DE   | not DE   | not DE   | not DE  |
| EVM0003194 | LG4 | hypothetical protein PRUPE_pp | not DE   | not DE   | not DE   | not DE  |
| EVM0010023 | LG4 | hypothetical protein PRUPE_pp | not DE   | not DE   | not DE   | not DE  |
| EVM0000713 | LG4 | hypothetical protein PRUPE_pp | not DE   | not DE   | not DE   | not DE  |
| EVM0012233 | LG4 | hypothetical protein PRUPE_pp | not DE   | not DE   | not DE   | not DE  |
| EVM0010739 | LG4 | hypothetical protein PRUPE_pp | -2.07464 | 0.01368  | not DE   | not DE  |
| EVM0009871 | LG4 | hypothetical protein PRUPE_pp | not DE   | not DE   | not DE   | not DE  |
| EVM0021534 | LG4 | hypothetical protein PRUPE_pp | not DE   | not DE   | not DE   | not DE  |
| EVM0003116 | LG4 | hypothetical protein PRUPE_pp | not DE   | not DE   | 1.917253 | 0.00887 |
| EVM0012319 | LG4 | hypothetical protein PRUPE_pp | not DE   | not DE   | not DE   | not DE  |
| EVM0006479 | LG4 | hypothetical protein PRUPE_pp | not DE   | not DE   | not DE   | not DE  |
| EVM0004115 | LG4 | hypothetical protein PRUPE_pp | not DE   | not DE   | not DE   | not DE  |
| EVM0007532 | LG4 | hypothetical protein PRUPE_pp | not DE   | not DE   | not DE   | not DE  |
| EVM0000995 | LG4 | hypothetical protein RCOM_058 | not DE   | not DE   | not DE   | not DE  |
| EVM0004830 | LG4 | hypothetical protein SELMODRA | not DE   | not DE   | -2.42284 | 0.00399 |
| EVM0015234 | LG4 | hypothetical protein TCM_0340 | not DE   | not DE   | not DE   | not DE  |
| EVM0013946 | LG4 | hypothetical protein VITISV_C | not DE   | not DE   | not DE   | not DE  |
| EVM0000767 | LG4 | hypothetical protein VITISV_C | not DE   | not DE   | not DE   | not DE  |
| EVM0000155 | LG4 | hypothetical protein VITISV_C | not DE   | not DE   | not DE   | not DE  |
| EVM0004811 | LG4 | hypothetical protein VITISV_C | not DE   | not DE   | not DE   | not DE  |
| EVM0006282 | LG4 | hypothetical protein VITISV_C | not DE   | not DE   | not DE   | not DE  |
| EVM0019261 | LG4 | hypothetical protein VITISV_C | not DE   | not DE   | not DE   | not DE  |
| EVM0015960 | LG4 | hypothetical protein VITISV_C | not DE   | not DE   | not DE   | not DE  |
| EVM0020548 | LG4 | hypothetical protein VITISV_C | not DE   | not DE   | not DE   | not DE  |
| EVM0024051 | LG4 | hypothetical protein VITISV_C | not DE   | not DE   | not DE   | not DE  |
| EVM0008347 | LG4 | hypothetical protein VITISV_C | not DE   | not DE   | not DE   | not DE  |
| EVM0009365 | LG4 | hypothetical protein VITISV_C | not DE   | not DE   | not DE   | not DE  |
| EVM0013444 | LG4 | hypothetical protein VITISV_C | not DE   | not DE   | not DE   | not DE  |
| EVM0021617 | LG4 | hypothetical protein VITISV_C | not DE   | not DE   | not DE   | not DE  |
| EVM0016696 | LG4 | hypothetical protein VITISV_C | not DE   | not DE   | not DE   | not DE  |
| EVM0021550 | LG4 | hypothetical protein VITISV_C | not DE   | not DE   | not DE   | not DE  |
| EVM0000415 | LG4 | hypothetical protein VITISV_C | not DE   | not DE   | not DE   | not DE  |
| EVM0007343 | LG4 | hypothetical protein VITISV_C | not DE   | not DE   | not DE   | not DE  |
| EVM0014188 | LG4 | hypothetical protein glysoja  | not DE   | not DE   | not DE   | not DE  |
| EVM0010929 | LG4 | hypothetical protein glysoja  | not DE   | not DE   | not DE   | not DE  |
| EVM0023437 | LG4 | integrase                     | not DE   | not DE   | not DE   | not DE  |
| EVM0014468 | LG4 | laccase                       | 2.01238  | 0.021961 | not DE   | not DE  |
| EVM0011164 | LG4 | monooxygenase, putative       | not DE   | not DE   | not DE   | not DE  |
| EVM0020854 | LG4 | myb family transcription fact | -3.2804  | 0.007909 | not DE   | not DE  |
| EVM0009344 | LG4 | pathogenesis-related thaumati | 1.068122 | 0.048023 | not DE   | not DE  |
| EVM0009667 | LG4 | pentatricopeptide repeat-cont | not DE   | not DE   | not DE   | not DE  |
| EVM0001464 | LG4 | peptidase, putative           | not DE   | not DE   | not DE   | not DE  |
| EVM0017594 | LG4 | peroxidase 4                  | not DE   | not DE   | not DE   | not DE  |
| EVM0001733 | LG4 | photosystem II protein K (chl | not DE   | not DE   | not DE   | not DE  |
| EVM0013536 | LG4 | phytosulfokines precursor, pu | not DE   | not DE   | not DE   | not DE  |
| EVM0008270 | LG4 | purine transporter, putative  | not DE   | not DE   | not DE   | not DE  |
| EVM0019974 | LG4 | purine transporter, putative  | not DE   | not DE   | not DE   | not DE  |
| EVM0010405 | LG4 | putative 39S ribosomal L53, m | not DE   | not DE   | not DE   | not DE  |

|            |     |                                       |          |          |          |         |
|------------|-----|---------------------------------------|----------|----------|----------|---------|
| EVM0014025 | LG4 | putative membrane protein             | not DE   | not DE   | not DE   | not DE  |
| EVM0003834 | LG4 | putative phosphoglycerate mutase      | not DE   | not DE   | not DE   | not DE  |
| EVM0008191 | LG4 | putative ubiquitin-conjugating enzyme | not DE   | not DE   | not DE   | not DE  |
| EVM0017155 | LG4 | regulator of chromosome condensation  | not DE   | not DE   | not DE   | not DE  |
| EVM0024086 | LG4 | remorin-1 protein                     | not DE   | not DE   | not DE   | not DE  |
| EVM0010027 | LG4 | ribosomal protein L3                  | not DE   | not DE   | not DE   | not DE  |
| EVM0020771 | LG4 | ribosomal protein S2                  | -1.15269 | 0.035611 | not DE   | not DE  |
| EVM0018921 | LG4 | rnf5, putative                        | not DE   | not DE   | not DE   | not DE  |
| EVM0024509 | LG4 | senescence-associated family 1        | -2.06745 | 0.003187 | 1.094416 | 0.00108 |
| EVM0024303 | LG4 | somatic embryogenesis receptor        | not DE   | not DE   | not DE   | not DE  |
| EVM0007506 | LG4 | sucrose carrier                       | not DE   | not DE   | -1.25649 | 0.00144 |
| EVM0017846 | LG4 | sucrose nonfermenting 1-related       | not DE   | not DE   | not DE   | not DE  |
| EVM0016831 | LG4 | transcription factor, putative        | not DE   | not DE   | not DE   | not DE  |
| EVM0020202 | LG4 | transcription factor, putative        | not DE   | not DE   | not DE   | not DE  |
| EVM0013381 | LG4 | uncharacterized protein LOC100506481  | not DE   | not DE   | not DE   | not DE  |
| EVM0018932 | LG4 | uncharacterized protein LOC100506481  | -1.19212 | 0.001612 | not DE   | not DE  |
| EVM0002195 | LG4 | unknown protein                       | not DE   | not DE   | not DE   | not DE  |
| EVM0002237 | LG4 | unknown protein                       | not DE   | not DE   | not DE   | not DE  |
| EVM0002544 | LG4 | unknown protein                       | not DE   | not DE   | not DE   | not DE  |
| EVM0005042 | LG4 | unknown protein                       | not DE   | not DE   | not DE   | not DE  |
| EVM0005510 | LG4 | unknown protein                       | not DE   | not DE   | not DE   | not DE  |
| EVM0006089 | LG4 | unknown protein                       | not DE   | not DE   | not DE   | not DE  |
| EVM0009187 | LG4 | unknown protein                       | not DE   | not DE   | not DE   | not DE  |
| EVM0010712 | LG4 | unknown protein                       | not DE   | not DE   | not DE   | not DE  |
| EVM0011083 | LG4 | unknown protein                       | not DE   | not DE   | not DE   | not DE  |
| EVM0011967 | LG4 | unknown protein                       | not DE   | not DE   | not DE   | not DE  |
| EVM0012124 | LG4 | unknown protein                       | not DE   | not DE   | not DE   | not DE  |
| EVM0015669 | LG4 | unknown protein                       | not DE   | not DE   | not DE   | not DE  |
| EVM0018797 | LG4 | unknown protein                       | 2.494236 | 0.012056 | not DE   | not DE  |
| EVM0018901 | LG4 | unknown protein                       | not DE   | not DE   | not DE   | not DE  |
| EVM0019817 | LG4 | unknown protein                       | not DE   | not DE   | not DE   | not DE  |
| EVM0020352 | LG4 | unknown protein                       | not DE   | not DE   | not DE   | not DE  |
| EVM0020461 | LG4 | unknown protein                       | not DE   | not DE   | not DE   | not DE  |
| EVM0022302 | LG4 | unknown protein                       | not DE   | not DE   | not DE   | not DE  |
| EVM0023030 | LG4 | unknown protein                       | not DE   | not DE   | not DE   | not DE  |
| EVM0001118 | LG4 | unnamed protein product               | not DE   | not DE   | not DE   | not DE  |
| EVM0001739 | LG4 | unnamed protein product               | not DE   | not DE   | not DE   | not DE  |
| EVM0002010 | LG4 | unnamed protein product               | -2.37372 | 0.004291 | not DE   | not DE  |
| EVM0002696 | LG4 | unnamed protein product               | not DE   | not DE   | not DE   | not DE  |
| EVM0002706 | LG4 | unnamed protein product               | not DE   | not DE   | not DE   | not DE  |
| EVM0003673 | LG4 | unnamed protein product               | not DE   | not DE   | not DE   | not DE  |
| EVM0005577 | LG4 | unnamed protein product               | not DE   | not DE   | 2.232037 | 0.01655 |
| EVM0009043 | LG4 | unnamed protein product               | 3.362457 | 0.009973 | not DE   | not DE  |
| EVM0011208 | LG4 | unnamed protein product               | not DE   | not DE   | not DE   | not DE  |
| EVM0011883 | LG4 | unnamed protein product               | not DE   | not DE   | not DE   | not DE  |
| EVM0012803 | LG4 | unnamed protein product               | not DE   | not DE   | not DE   | not DE  |
| EVM0015330 | LG4 | unnamed protein product               | not DE   | not DE   | not DE   | not DE  |
| EVM0015497 | LG4 | unnamed protein product               | not DE   | not DE   | -1.06574 | 0.00135 |
| EVM0015959 | LG4 | unnamed protein product               | not DE   | not DE   | not DE   | not DE  |
| EVM0016909 | LG4 | unnamed protein product               | not DE   | not DE   | not DE   | not DE  |
| EVM0016975 | LG4 | unnamed protein product               | not DE   | not DE   | not DE   | not DE  |
| EVM0017887 | LG4 | unnamed protein product               | not DE   | not DE   | not DE   | not DE  |
| EVM0018092 | LG4 | unnamed protein product               | not DE   | not DE   | not DE   | not DE  |
| EVM0018369 | LG4 | unnamed protein product               | not DE   | not DE   | not DE   | not DE  |

|            |     |                               |          |          |          |         |
|------------|-----|-------------------------------|----------|----------|----------|---------|
| EVM0020146 | LG4 | unnamed protein product       | not DE   | not DE   | not DE   | not DE  |
| EVM0020434 | LG4 | unnamed protein product       | not DE   | not DE   | not DE   | not DE  |
| EVM0021130 | LG4 | unnamed protein product       | not DE   | not DE   | not DE   | not DE  |
| EVM0021278 | LG4 | unnamed protein product       | not DE   | not DE   | not DE   | not DE  |
| EVM0022088 | LG4 | unnamed protein product       | not DE   | not DE   | not DE   | not DE  |
| EVM0022508 | LG4 | unnamed protein product       | not DE   | not DE   | -1.5063  | 0.00243 |
| EVM0022594 | LG4 | unnamed protein product       | not DE   | not DE   | not DE   | not DE  |
| EVM0023205 | LG4 | unnamed protein product       | not DE   | not DE   | not DE   | not DE  |
| EVM0023526 | LG4 | unnamed protein product       | not DE   | not DE   | not DE   | not DE  |
| EVM0023842 | LG4 | unnamed protein product       | not DE   | not DE   | not DE   | not DE  |
| EVM0024518 | LG4 | unnamed protein product       | not DE   | not DE   | not DE   | not DE  |
| EVM0019629 | LG4 | wood-associated NAC domain tr | not DE   | not DE   | not DE   | not DE  |
| EVM0006923 | LG4 | zinc finger family protein    | not DE   | not DE   | not DE   | not DE  |
| EVM0003040 | LG4 | zinc finger protein, putative | not DE   | not DE   | not DE   | not DE  |
| EVM0017058 | LG4 | zinc finger protein, putative | not DE   | not DE   | not DE   | not DE  |
| EVM0006522 | LG5 | (3S, 6E)-nerolidol synthase 2 | not DE   | not DE   | not DE   | not DE  |
| EVM0008242 | LG5 | (E, E)-geranylinalool syntha  | not DE   | not DE   | not DE   | not DE  |
| EVM0020843 | LG5 | (E, E)-geranylinalool syntha  | not DE   | not DE   | not DE   | not DE  |
| EVM0003681 | LG5 | (R)-limonene synthase 1-like  | not DE   | not DE   | not DE   | not DE  |
| EVM0005724 | LG5 | (R)-limonene synthase 1-like  | not DE   | not DE   | not DE   | not DE  |
| EVM0009065 | LG5 | (R)-limonene synthase 1-like  | not DE   | not DE   | not DE   | not DE  |
| EVM0009651 | LG5 | (R)-limonene synthase 1-like  | not DE   | not DE   | not DE   | not DE  |
| EVM0013167 | LG5 | (R)-limonene synthase 1-like  | not DE   | not DE   | not DE   | not DE  |
| EVM0016246 | LG5 | (R)-limonene synthase 1-like  | not DE   | not DE   | not DE   | not DE  |
| EVM0021334 | LG5 | (R)-limonene synthase 1-like  | not DE   | not DE   | not DE   | not DE  |
| EVM0024120 | LG5 | (R)-limonene synthase 1-like  | not DE   | not DE   | not DE   | not DE  |
| EVM0024601 | LG5 | (R)-limonene synthase 1-like  | not DE   | not DE   | not DE   | not DE  |
| EVM0010207 | LG5 | 1-acyl-sn-glycerol-3-phospha  | not DE   | not DE   | not DE   | not DE  |
| EVM0018129 | LG5 | 1-aminocyclopropane-1-carbox  | -2.03503 | 0.000817 | not DE   | not DE  |
| EVM0017909 | LG5 | 14 kDa zinc-binding protein-  | not DE   | not DE   | not DE   | not DE  |
| EVM0003234 | LG5 | 14-3-3-like protein D-like    | not DE   | not DE   | not DE   | not DE  |
| EVM0007966 | LG5 | 2-alkenal reductase (NADP(+)  | not DE   | not DE   | 1.169152 | 0.03024 |
| EVM0000892 | LG5 | 2-aminoethanethiol dioxygena  | not DE   | not DE   | not DE   | not DE  |
| EVM0009208 | LG5 | 2-aminoethanethiol dioxygena  | not DE   | not DE   | not DE   | not DE  |
| EVM0016623 | LG5 | 2-succinylbenzoate--CoA liga  | not DE   | not DE   | not DE   | not DE  |
| EVM0011072 | LG5 | 21 kDa seed protein-like iso  | not DE   | not DE   | not DE   | not DE  |
| EVM0012231 | LG5 | 3-oxoacyl-[acyl-carrier-prot  | not DE   | not DE   | not DE   | not DE  |
| EVM0011935 | LG5 | 39S ribosomal protein L4, mi  | not DE   | not DE   | not DE   | not DE  |
| EVM0001360 | LG5 | 40S ribosomal protein S11-li  | not DE   | not DE   | not DE   | not DE  |
| EVM0021133 | LG5 | 40S ribosomal protein S12     | not DE   | not DE   | not DE   | not DE  |
| EVM0024011 | LG5 | 40S ribosomal protein S14-3-  | not DE   | not DE   | not DE   | not DE  |
| EVM0015527 | LG5 | 5&apos;-adenylylsulfate redu  | -1.75758 | 0.012652 | not DE   | not DE  |
| EVM0018057 | LG5 | 50S ribosomal protein L21, m  | not DE   | not DE   | not DE   | not DE  |
| EVM0021377 | LG5 | 50S ribosomal protein L34, c  | not DE   | not DE   | not DE   | not DE  |
| EVM0021992 | LG5 | 50S ribosomal protein L9, ch  | not DE   | not DE   | not DE   | not DE  |
| EVM0019671 | LG5 | 54S ribosomal protein L12, m  | not DE   | not DE   | not DE   | not DE  |
| EVM0024652 | LG5 | 54S ribosomal protein L12, m  | not DE   | not DE   | not DE   | not DE  |
| EVM0018545 | LG5 | ABC transporter G family mem  | not DE   | not DE   | not DE   | not DE  |
| EVM0012961 | LG5 | ADP, ATP carrier protein 1, m | not DE   | not DE   | not DE   | not DE  |
| EVM0004478 | LG5 | ADP, ATP carrier protein 3, m | not DE   | not DE   | not DE   | not DE  |
| EVM0002827 | LG5 | AP2-like ethylene-responsive  | not DE   | not DE   | not DE   | not DE  |
| EVM0015104 | LG5 | AP2/ERF and B3 domain-contain | not DE   | not DE   | not DE   | not DE  |
| EVM0015051 | LG5 | BAG family molecular chapero  | not DE   | not DE   | not DE   | not DE  |
| EVM0016252 | LG5 | BES1/BZR1 homolog protein 4-  | not DE   | not DE   | not DE   | not DE  |

|            |     |                              |          |          |          |         |
|------------|-----|------------------------------|----------|----------|----------|---------|
| EVM0021216 | LG5 | BOI-related E3 ubiquitin-pro | not DE   | not DE   | not DE   | not DE  |
| EVM0010856 | LG5 | BTB/POZ domain-containing pr | not DE   | not DE   | not DE   | not DE  |
| EVM0007991 | LG5 | CBL-interacting serine/threo | not DE   | not DE   | not DE   | not DE  |
| EVM0011755 | LG5 | CBL-interacting serine/threo | -2.44693 | 2.31E-10 | not DE   | not DE  |
| EVM0007380 | LG5 | CTD small phosphatase-like p | not DE   | not DE   | not DE   | not DE  |
| EVM0003872 | LG5 | CTP synthase 2-like isoform  | 3.093757 | 0.002018 | 1.922333 | #####   |
| EVM0001524 | LG5 | D-tyrosyl-tRNA(Tyr) deacylas | not DE   | not DE   | not DE   | not DE  |
| EVM0015999 | LG5 | DAG protein, chloroplastic   | not DE   | not DE   | not DE   | not DE  |
| EVM0004071 | LG5 | DDB1- and CUL4-associated fa | not DE   | not DE   | not DE   | not DE  |
| EVM0011428 | LG5 | DNA damage-binding protein l | not DE   | not DE   | not DE   | not DE  |
| EVM0014382 | LG5 | DNA replication licensing fa | not DE   | not DE   | not DE   | not DE  |
| EVM0020638 | LG5 | DNA-binding protein DDB_G027 | not DE   | not DE   | not DE   | not DE  |
| EVM0006421 | LG5 | DNA-directed RNA polymerase  | 1.957751 | 6.14E-10 | not DE   | not DE  |
| EVM0011263 | LG5 | E3 ubiquitin-protein ligase  | not DE   | not DE   | not DE   | not DE  |
| EVM0013803 | LG5 | ER lumen protein retaining r | not DE   | not DE   | not DE   | not DE  |
| EVM0005316 | LG5 | F-box protein At1g61340-like | 1.213638 | 0.027341 | not DE   | not DE  |
| EVM0015769 | LG5 | F-box protein CPR30-like     | not DE   | not DE   | not DE   | not DE  |
| EVM0009130 | LG5 | F-box protein SKIP1-like     | not DE   | not DE   | not DE   | not DE  |
| EVM0017093 | LG5 | F-box protein SKIP19-like    | not DE   | not DE   | not DE   | not DE  |
| EVM0002780 | LG5 | G-type lectin S-receptor-lik | not DE   | not DE   | not DE   | not DE  |
| EVM0004939 | LG5 | G-type lectin S-receptor-lik | not DE   | not DE   | not DE   | not DE  |
| EVM0005450 | LG5 | G-type lectin S-receptor-lik | not DE   | not DE   | not DE   | not DE  |
| EVM0017583 | LG5 | G-type lectin S-receptor-lik | not DE   | not DE   | not DE   | not DE  |
| EVM0015718 | LG5 | G-type lectin S-receptor-lik | not DE   | not DE   | not DE   | not DE  |
| EVM0000780 | LG5 | G-type lectin S-receptor-lik | not DE   | not DE   | not DE   | not DE  |
| EVM0020517 | LG5 | G-type lectin S-receptor-lik | not DE   | not DE   | not DE   | not DE  |
| EVM0018765 | LG5 | G-type lectin S-receptor-lik | not DE   | not DE   | not DE   | not DE  |
| EVM0005412 | LG5 | GDP-L-galactose phosphorylas | not DE   | not DE   | not DE   | not DE  |
| EVM0008178 | LG5 | GDSL esterase/lipase At1g296 | not DE   | not DE   | not DE   | not DE  |
| EVM0005791 | LG5 | GDSL esterase/lipase At5g459 | -2.41156 | 0.049242 | not DE   | not DE  |
| EVM0016543 | LG5 | GDSL esterase/lipase At5g459 | -2.37238 | 0.040708 | not DE   | not DE  |
| EVM0000141 | LG5 | GDSL esterase/lipase At5g459 | not DE   | not DE   | not DE   | not DE  |
| EVM0007005 | LG5 | KH domain-containing protein | not DE   | not DE   | not DE   | not DE  |
| EVM0010150 | LG5 | LETM1 and EF-hand domain-con | not DE   | not DE   | not DE   | not DE  |
| EVM0012222 | LG5 | LOW QUALITY PROTEIN: peroxid | not DE   | not DE   | not DE   | not DE  |
| EVM0007200 | LG5 | LRR receptor-like serine/thr | not DE   | not DE   | not DE   | not DE  |
| EVM0015402 | LG5 | LRR receptor-like serine/thr | not DE   | not DE   | not DE   | not DE  |
| EVM0020632 | LG5 | NADP-dependent glyceraldehyd | not DE   | not DE   | not DE   | not DE  |
| EVM0019011 | LG5 | PTI1-like tyrosine-protein k | not DE   | not DE   | not DE   | not DE  |
| EVM0023361 | LG5 | QWRF motif-containing protei | not DE   | not DE   | not DE   | not DE  |
| EVM0008981 | LG5 | RNA polymerase II C-terminal | not DE   | not DE   | not DE   | not DE  |
| EVM0014926 | LG5 | SAP-like protein BP-73-like  | not DE   | not DE   | not DE   | not DE  |
| EVM0017064 | LG5 | U-box domain-containing prot | not DE   | not DE   | not DE   | not DE  |
| EVM0000252 | LG5 | U-box domain-containing prot | not DE   | not DE   | not DE   | not DE  |
| EVM0015697 | LG5 | U3 small nucleolar RNA-inter | not DE   | not DE   | -1.06876 | 0.01153 |
| EVM0009549 | LG5 | UBA and UBX domain-containin | not DE   | not DE   | not DE   | not DE  |
| EVM0017649 | LG5 | UBA and UBX domain-containin | not DE   | not DE   | not DE   | not DE  |
| EVM0016300 | LG5 | UPF0057 membrane protein At4 | not DE   | not DE   | not DE   | not DE  |
| EVM0008719 | LG5 | WAT1-related protein At4g304 | not DE   | not DE   | not DE   | not DE  |
| EVM0018899 | LG5 | WD repeat-containing protein | not DE   | not DE   | not DE   | not DE  |
| EVM0013188 | LG5 | abnormal spindle-like microc | not DE   | not DE   | not DE   | not DE  |
| EVM0001618 | LG5 | acidic mammalian chitinase-l | not DE   | not DE   | not DE   | not DE  |
| EVM0010329 | LG5 | actin-related protein 2/3 co | not DE   | not DE   | not DE   | not DE  |
| EVM0019467 | LG5 | acyl-protein thioesterase 1- | -1.66641 | 0.000109 | not DE   | not DE  |

|            |     |                                    |          |          |          |         |
|------------|-----|------------------------------------|----------|----------|----------|---------|
| EVM0014341 | LG5 | adenosine deaminase-like protein   | not DE   | not DE   | not DE   | not DE  |
| EVM0015098 | LG5 | agamous-like MADS-box protein      | not DE   | not DE   | not DE   | not DE  |
| EVM0017867 | LG5 | agamous-like MADS-box protein      | not DE   | not DE   | not DE   | not DE  |
| EVM0000053 | LG5 | agamous-like MADS-box protein      | not DE   | not DE   | not DE   | not DE  |
| EVM0002837 | LG5 | agamous-like MADS-box protein      | not DE   | not DE   | not DE   | not DE  |
| EVM0003261 | LG5 | agamous-like MADS-box protein      | not DE   | not DE   | not DE   | not DE  |
| EVM0008741 | LG5 | agamous-like MADS-box protein      | not DE   | not DE   | not DE   | not DE  |
| EVM0015043 | LG5 | alpha N-terminal protein           | not DE   | not DE   | not DE   | not DE  |
| EVM0002904 | LG5 | alpha-farnesene synthase-like      | not DE   | not DE   | not DE   | not DE  |
| EVM0014934 | LG5 | alpha-farnesene synthase-like      | not DE   | not DE   | not DE   | not DE  |
| EVM0016502 | LG5 | alpha-farnesene synthase-like      | not DE   | not DE   | not DE   | not DE  |
| EVM0013112 | LG5 | alpha/beta hydrolase domain        | not DE   | not DE   | not DE   | not DE  |
| EVM0004874 | LG5 | ankyrin repeat-containing protein  | -3.16393 | 0.02854  | not DE   | not DE  |
| EVM0013224 | LG5 | ankyrin repeat-containing protein  | not DE   | not DE   | 4.214788 | 0.00227 |
| EVM0013916 | LG5 | ankyrin repeat-containing protein  | not DE   | not DE   | not DE   | not DE  |
| EVM0000458 | LG5 | ankyrin repeat-containing protein  | not DE   | not DE   | not DE   | not DE  |
| EVM0009232 | LG5 | ankyrin repeat-containing protein  | not DE   | not DE   | not DE   | not DE  |
| EVM0010052 | LG5 | ankyrin repeat-containing protein  | not DE   | not DE   | not DE   | not DE  |
| EVM0014118 | LG5 | ankyrin repeat-containing protein  | not DE   | not DE   | not DE   | not DE  |
| EVM0016293 | LG5 | ankyrin repeat-containing protein  | not DE   | not DE   | not DE   | not DE  |
| EVM0023037 | LG5 | ankyrin repeat-containing protein  | not DE   | not DE   | 7.72438  | 0.00125 |
| EVM0014030 | LG5 | ankyrin repeat-containing protein  | not DE   | not DE   | not DE   | not DE  |
| EVM0013578 | LG5 | anthocyanidin 3-O-glucoside        | not DE   | not DE   | not DE   | not DE  |
| EVM0020415 | LG5 | anthocyanidin 3-O-glucoside        | not DE   | not DE   | not DE   | not DE  |
| EVM0010306 | LG5 | apolipoprotein D-like              | not DE   | not DE   | not DE   | not DE  |
| EVM0016819 | LG5 | apoptosis inhibitor 5-like         | not DE   | not DE   | not DE   | not DE  |
| EVM0023799 | LG5 | aquaporin NIP1-1                   | not DE   | not DE   | not DE   | not DE  |
| EVM0002016 | LG5 | aspartic proteinase-like isoform   | not DE   | not DE   | not DE   | not DE  |
| EVM0023255 | LG5 | autophagy-related protein 8C       | not DE   | not DE   | not DE   | not DE  |
| EVM0003977 | LG5 | auxin response factor 6-like       | not DE   | not DE   | not DE   | not DE  |
| EVM0017294 | LG5 | beta-amylase 7-like isoform        | not DE   | not DE   | not DE   | not DE  |
| EVM0024222 | LG5 | beta-galactosidase 6-like isoform  | not DE   | not DE   | not DE   | not DE  |
| EVM0023060 | LG5 | beta-galactosidase 8-like          | not DE   | not DE   | not DE   | not DE  |
| EVM0018233 | LG5 | beta-glucosidase 46-like           | not DE   | not DE   | not DE   | not DE  |
| EVM0023895 | LG5 | beta-glucosidase 47-like isoform   | not DE   | not DE   | not DE   | not DE  |
| EVM0004729 | LG5 | bidirectional sugar transporter    | 2.786101 | 3.89E-23 | 1.106018 | 0.02109 |
| EVM0018244 | LG5 | bifunctional epoxide hydrolase     | not DE   | not DE   | not DE   | not DE  |
| EVM0021625 | LG5 | bifunctional riboflavin kinase     | not DE   | not DE   | not DE   | not DE  |
| EVM0015524 | LG5 | caffeoylshikimate esterase-like    | not DE   | not DE   | not DE   | not DE  |
| EVM0022301 | LG5 | calcineurin subunit B-like isoform | not DE   | not DE   | not DE   | not DE  |
| EVM0016815 | LG5 | calcium-dependent protein kinase   | not DE   | not DE   | not DE   | not DE  |
| EVM0016871 | LG5 | cationic amino acid transporter    | not DE   | not DE   | not DE   | not DE  |
| EVM0019901 | LG5 | cationic amino acid transporter    | not DE   | not DE   | not DE   | not DE  |
| EVM0013181 | LG5 | cell division cycle protein        | not DE   | not DE   | not DE   | not DE  |
| EVM0018668 | LG5 | chaperonin 60 subunit alpha        | not DE   | not DE   | not DE   | not DE  |
| EVM0012174 | LG5 | chitin elicitor receptor kinase    | not DE   | not DE   | not DE   | not DE  |
| EVM0004016 | LG5 | chitotriosidase-1-like             | 4.962286 | 0.001143 | not DE   | not DE  |
| EVM0002055 | LG5 | clathrin light chain 1-like        | not DE   | not DE   | not DE   | not DE  |
| EVM0007894 | LG5 | coatomer subunit delta-like        | not DE   | not DE   | not DE   | not DE  |
| EVM0008473 | LG5 | cold-inducible RNA-binding protein | not DE   | not DE   | not DE   | not DE  |
| EVM0001472 | LG5 | conserved oligomeric Golgi complex | not DE   | not DE   | not DE   | not DE  |
| EVM0016883 | LG5 | conserved oligomeric Golgi complex | not DE   | not DE   | not DE   | not DE  |
| EVM0000454 | LG5 | cullin-4-like isoform X1           | not DE   | not DE   | not DE   | not DE  |
| EVM0011882 | LG5 | cullin-4-like isoform X1           | not DE   | not DE   | -3.55436 | #####   |

|            |     |                               |          |          |          |         |
|------------|-----|-------------------------------|----------|----------|----------|---------|
| EVM0015925 | LG5 | cyclin-D-binding Myb-like tr  | not DE   | not DE   | not DE   | not DE  |
| EVM0009942 | LG5 | cyclin-T1-5-like              | not DE   | not DE   | not DE   | not DE  |
| EVM0015988 | LG5 | cysteine proteinase inhibitor | not DE   | not DE   | not DE   | not DE  |
| EVM0011007 | LG5 | cysteine-rich receptor-like   | not DE   | not DE   | not DE   | not DE  |
| EVM0001217 | LG5 | cysteine-rich receptor-like   | not DE   | not DE   | not DE   | not DE  |
| EVM0008401 | LG5 | cysteine-rich receptor-like   | not DE   | not DE   | not DE   | not DE  |
| EVM0009860 | LG5 | cysteine-rich receptor-like   | not DE   | not DE   | not DE   | not DE  |
| EVM0012169 | LG5 | cysteine-rich receptor-like   | not DE   | not DE   | not DE   | not DE  |
| EVM0017128 | LG5 | cysteine-rich receptor-like   | not DE   | not DE   | not DE   | not DE  |
| EVM0019726 | LG5 | cysteine-rich receptor-like   | not DE   | not DE   | not DE   | not DE  |
| EVM0017062 | LG5 | cysteine-rich receptor-like   | not DE   | not DE   | not DE   | not DE  |
| EVM0000432 | LG5 | cytochrome c6, chloroplastid  | -1.91697 | 0.009081 | not DE   | not DE  |
| EVM0006078 | LG5 | cytosolic sulfotransferase l  | not DE   | not DE   | not DE   | not DE  |
| EVM0002300 | LG5 | cytosolic sulfotransferase l  | not DE   | not DE   | not DE   | not DE  |
| EVM0011274 | LG5 | cytosolic sulfotransferase l  | not DE   | not DE   | not DE   | not DE  |
| EVM0005016 | LG5 | cytosolic sulfotransferase l  | not DE   | not DE   | not DE   | not DE  |
| EVM0019410 | LG5 | dicer-like protein 4-like is  | not DE   | not DE   | not DE   | not DE  |
| EVM0002804 | LG5 | disease resistance protein A  | not DE   | not DE   | not DE   | not DE  |
| EVM0024666 | LG5 | dnaJ homolog subfamily C mem  | not DE   | not DE   | not DE   | not DE  |
| EVM0020923 | LG5 | dof zinc finger protein DOF4  | not DE   | not DE   | not DE   | not DE  |
| EVM0022483 | LG5 | endoglucanase 12              | not DE   | not DE   | not DE   | not DE  |
| EVM0009510 | LG5 | enhancer of polycomb homolog  | not DE   | not DE   | not DE   | not DE  |
| EVM0021544 | LG5 | equilibrative nucleotide tran | not DE   | not DE   | not DE   | not DE  |
| EVM0007694 | LG5 | ethylene-responsive transcri  | not DE   | not DE   | -1.79103 | #####   |
| EVM0020391 | LG5 | eukaryotic translation initi  | not DE   | not DE   | -1.05911 | #####   |
| EVM0014073 | LG5 | exocyst complex component EX  | not DE   | not DE   | not DE   | not DE  |
| EVM0017406 | LG5 | exonuclease 1-like            | not DE   | not DE   | not DE   | not DE  |
| EVM0012648 | LG5 | fatty acid 2-hydroxylase 2-l  | not DE   | not DE   | not DE   | not DE  |
| EVM0016047 | LG5 | flagellar attachment zone pr  | not DE   | not DE   | not DE   | not DE  |
| EVM0012113 | LG5 | general transcription factor  | not DE   | not DE   | not DE   | not DE  |
| EVM0012712 | LG5 | gibberellin 2-beta-dioxygena  | not DE   | not DE   | not DE   | not DE  |
| EVM0021145 | LG5 | gibberellin 20 oxidase 1-D-l  | not DE   | not DE   | not DE   | not DE  |
| EVM0016874 | LG5 | glucan endo-1,3-beta-glucosi  | not DE   | not DE   | not DE   | not DE  |
| EVM0009245 | LG5 | glucose-induced degradation   | not DE   | not DE   | not DE   | not DE  |
| EVM0008944 | LG5 | glutamate receptor 2.8-like   | not DE   | not DE   | not DE   | not DE  |
| EVM0024284 | LG5 | glutamate receptor 2.8-like   | not DE   | not DE   | not DE   | not DE  |
| EVM0006602 | LG5 | glutamate receptor 2.9-like   | not DE   | not DE   | not DE   | not DE  |
| EVM0012131 | LG5 | glutaredoxin-C9-like          | not DE   | not DE   | not DE   | not DE  |
| EVM0020645 | LG5 | glycerophosphodiester phosph  | not DE   | not DE   | not DE   | not DE  |
| EVM0012442 | LG5 | heat shock 70 kDa protein 16  | not DE   | not DE   | not DE   | not DE  |
| EVM0006645 | LG5 | heat stress transcription fa  | not DE   | not DE   | not DE   | not DE  |
| EVM0023094 | LG5 | hemiasterlin resistant prote  | not DE   | not DE   | not DE   | not DE  |
| EVM0007884 | LG5 | heptahelical transmembrane p  | -1.47762 | 0.013278 | -1.48828 | 0.00956 |
| EVM0024595 | LG5 | histone-lysine N-methyltrans  | not DE   | not DE   | not DE   | not DE  |
| EVM0006102 | LG5 | homeobox-leucine zipper prot  | -1.27031 | 0.036169 | not DE   | not DE  |
| EVM0020286 | LG5 | internal alternative NAD(P)H  | not DE   | not DE   | not DE   | not DE  |
| EVM0006722 | LG5 | katanin p80 WD40 repeat-cont  | not DE   | not DE   | not DE   | not DE  |
| EVM0015543 | LG5 | lecithin-cholesterol acyltra  | 1.221646 | 0.042856 | not DE   | not DE  |
| EVM0001225 | LG5 | leucine aminopeptidase 1-lik  | not DE   | not DE   | not DE   | not DE  |
| EVM0022681 | LG5 | leucine-rich repeat receptor  | not DE   | not DE   | not DE   | not DE  |
| EVM0007801 | LG5 | malonyl-CoA decarboxylase, m  | not DE   | not DE   | not DE   | not DE  |
| EVM0000832 | LG5 | mediator-associated protein   | not DE   | not DE   | not DE   | not DE  |
| EVM0017325 | LG5 | membrane-bound transcription  | not DE   | not DE   | not DE   | not DE  |
| EVM0008169 | LG5 | metalloendoprotease 1-like    | not DE   | not DE   | not DE   | not DE  |

|            |     |                                               |          |          |          |         |
|------------|-----|-----------------------------------------------|----------|----------|----------|---------|
| EVM0013207 | LG5 | microfibrillar-associated protein             | not DE   | not DE   | not DE   | not DE  |
| EVM0016938 | LG5 | mitochondrial arginine transporter            | not DE   | not DE   | not DE   | not DE  |
| EVM0019064 | LG5 | mitochondrial inner membrane protein          | not DE   | not DE   | not DE   | not DE  |
| EVM0013272 | LG5 | mitochondrial translocator associated protein | not DE   | not DE   | not DE   | not DE  |
| EVM0017417 | LG5 | monothiol glutaredoxin-S17-like               | not DE   | not DE   | not DE   | not DE  |
| EVM0011396 | LG5 | myb-related protein Myb4-like                 | not DE   | not DE   | not DE   | not DE  |
| EVM0010221 | LG5 | nicotinamide mononucleotide                   | not DE   | not DE   | not DE   | not DE  |
| EVM0010522 | LG5 | nuclear transcription factor                  | not DE   | not DE   | not DE   | not DE  |
| EVM0021947 | LG5 | nucleobase-ascorbate transporter              | not DE   | not DE   | not DE   | not DE  |
| EVM0009461 | LG5 | nucleoporin Nup43-like                        | not DE   | not DE   | not DE   | not DE  |
| EVM0003838 | LG5 | obg-like ATPase 1-like                        | not DE   | not DE   | not DE   | not DE  |
| EVM0011102 | LG5 | oxygen-evolving enhancer protein              | -2.23965 | 0.006056 | not DE   | not DE  |
| EVM0021859 | LG5 | p21-activated protein kinase                  | not DE   | not DE   | not DE   | not DE  |
| EVM0010123 | LG5 | patatin group M-2-like                        | not DE   | not DE   | not DE   | not DE  |
| EVM0012382 | LG5 | patatin group M-2-like                        | not DE   | not DE   | not DE   | not DE  |
| EVM0017413 | LG5 | patatin group M-2-like                        | not DE   | not DE   | not DE   | not DE  |
| EVM0018342 | LG5 | patatin group M-2-like                        | not DE   | not DE   | not DE   | not DE  |
| EVM0022736 | LG5 | patatin group M-2-like                        | not DE   | not DE   | not DE   | not DE  |
| EVM0007853 | LG5 | pathogenesis-related protein                  | -5.32967 | 0.00012  | 2.480106 | 0.03346 |
| EVM0004309 | LG5 | pentatricopeptide repeat-containing           | 2.131922 | 0.009746 | not DE   | not DE  |
| EVM0005179 | LG5 | pentatricopeptide repeat-containing           | not DE   | not DE   | not DE   | not DE  |
| EVM0020478 | LG5 | pentatricopeptide repeat-containing           | not DE   | not DE   | not DE   | not DE  |
| EVM0017455 | LG5 | pentatricopeptide repeat-containing           | not DE   | not DE   | not DE   | not DE  |
| EVM0009337 | LG5 | pentatricopeptide repeat-containing           | not DE   | not DE   | not DE   | not DE  |
| EVM0013256 | LG5 | pentatricopeptide repeat-containing           | 1.868786 | 0.000871 | not DE   | not DE  |
| EVM0011597 | LG5 | pentatricopeptide repeat-containing           | not DE   | not DE   | not DE   | not DE  |
| EVM0001577 | LG5 | pentatricopeptide repeat-containing           | not DE   | not DE   | not DE   | not DE  |
| EVM0008996 | LG5 | pentatricopeptide repeat-containing           | not DE   | not DE   | not DE   | not DE  |
| EVM0005996 | LG5 | pentatricopeptide repeat-containing           | not DE   | not DE   | not DE   | not DE  |
| EVM0002961 | LG5 | peroxidase 42                                 | not DE   | not DE   | not DE   | not DE  |
| EVM0015855 | LG5 | peroxidase 7-like                             | not DE   | not DE   | not DE   | not DE  |
| EVM0010928 | LG5 | peroxisomal 2,4-dienoyl-CoA                   | not DE   | not DE   | not DE   | not DE  |
| EVM0002779 | LG5 | peroxisomal ATPase pex1-like                  | not DE   | not DE   | not DE   | not DE  |
| EVM0014250 | LG5 | peroxisomal ATPase pex1-like                  | not DE   | not DE   | not DE   | not DE  |
| EVM0019028 | LG5 | peroxisomal membrane protein                  | not DE   | not DE   | not DE   | not DE  |
| EVM0019059 | LG5 | peroxisome biogenesis protein                 | not DE   | not DE   | -1.11464 | #####   |
| EVM0001380 | LG5 | phosphatase IMPL1, chloroplast                | not DE   | not DE   | not DE   | not DE  |
| EVM0018651 | LG5 | phospho-N-acetylmuramoyl-peptide              | not DE   | not DE   | not DE   | not DE  |
| EVM0015149 | LG5 | phospholipase A1-Igamma3, chloroplast         | not DE   | not DE   | not DE   | not DE  |
| EVM0021518 | LG5 | pistil-specific extensin-like                 | not DE   | not DE   | not DE   | not DE  |
| EVM0004327 | LG5 | plasma membrane-associated protein            | not DE   | not DE   | not DE   | not DE  |
| EVM0014736 | LG5 | plastid-lipid-associated protein              | not DE   | not DE   | not DE   | not DE  |
| EVM0017443 | LG5 | plastid-lipid-associated protein              | not DE   | not DE   | not DE   | not DE  |
| EVM0012342 | LG5 | polygalacturonase QRT3-like                   | not DE   | not DE   | not DE   | not DE  |
| EVM0015324 | LG5 | potassium transporter 10-like                 | not DE   | not DE   | not DE   | not DE  |
| EVM0023579 | LG5 | pre-mRNA-splicing factor SYF                  | not DE   | not DE   | not DE   | not DE  |
| EVM0001627 | LG5 | probable 3-hydroxyisobutyrate                 | not DE   | not DE   | not DE   | not DE  |
| EVM0000488 | LG5 | probable ADP-ribosylation factor              | not DE   | not DE   | not DE   | not DE  |
| EVM0011150 | LG5 | probable ATP-dependent RNA helicase           | not DE   | not DE   | not DE   | not DE  |
| EVM0021455 | LG5 | probable CCR4-associated factor               | -1.1287  | 0.000706 | not DE   | not DE  |
| EVM0001341 | LG5 | probable LRR receptor-like signaling          | not DE   | not DE   | not DE   | not DE  |
| EVM0006739 | LG5 | probable LRR receptor-like signaling          | not DE   | not DE   | not DE   | not DE  |
| EVM0020583 | LG5 | probable LRR receptor-like signaling          | not DE   | not DE   | not DE   | not DE  |
| EVM0011120 | LG5 | probable LRR receptor-like signaling          | not DE   | not DE   | not DE   | not DE  |



|            |     |                               |          |          |          |         |
|------------|-----|-------------------------------|----------|----------|----------|---------|
| EVM0024234 | LG5 | probable LRR receptor-like s  | not DE   | not DE   | not DE   | not DE  |
| EVM0022248 | LG5 | probable LRR receptor-like s  | not DE   | not DE   | not DE   | not DE  |
| EVM0001156 | LG5 | probable LRR receptor-like s  | not DE   | not DE   | not DE   | not DE  |
| EVM0004413 | LG5 | probable alpha, alpha-trehalo | not DE   | not DE   | not DE   | not DE  |
| EVM0020138 | LG5 | probable beta-1,3-galactosyl  | not DE   | not DE   | not DE   | not DE  |
| EVM0004712 | LG5 | probable beta-1,3-galactosyl  | not DE   | not DE   | not DE   | not DE  |
| EVM0002719 | LG5 | probable beta-D-xylosidase 5  | not DE   | not DE   | not DE   | not DE  |
| EVM0018161 | LG5 | probable cardiolipin synthas  | not DE   | not DE   | not DE   | not DE  |
| EVM0010483 | LG5 | probable cyclic nucleotide-g  | not DE   | not DE   | not DE   | not DE  |
| EVM0011081 | LG5 | probable disease resistance   | not DE   | not DE   | not DE   | not DE  |
| EVM0002794 | LG5 | probable glycosyltransferase  | not DE   | not DE   | not DE   | not DE  |
| EVM0006114 | LG5 | probable leucine-rich repeat  | not DE   | not DE   | not DE   | not DE  |
| EVM0019847 | LG5 | probable leucine-rich repeat  | not DE   | not DE   | not DE   | not DE  |
| EVM0019308 | LG5 | probable lysine-specific dem  | not DE   | not DE   | not DE   | not DE  |
| EVM0007835 | LG5 | probable phenylalanine--tRNA  | not DE   | not DE   | not DE   | not DE  |
| EVM0011149 | LG5 | probable phosphatase C1620.1  | -1.10568 | 0.019296 | not DE   | not DE  |
| EVM0001267 | LG5 | probable purine permease 9    | not DE   | not DE   | not DE   | not DE  |
| EVM0010493 | LG5 | probable purine permease 9    | not DE   | not DE   | not DE   | not DE  |
| EVM0005351 | LG5 | probable purine permease 9-l  | not DE   | not DE   | not DE   | not DE  |
| EVM0010177 | LG5 | probable purine permease 9-l  | not DE   | not DE   | not DE   | not DE  |
| EVM0007436 | LG5 | probable pyruvate, phosphate  | not DE   | not DE   | not DE   | not DE  |
| EVM0012674 | LG5 | probable receptor-like serin  | not DE   | not DE   | not DE   | not DE  |
| EVM0024599 | LG5 | probable ribose-5-phosphate   | -1.50197 | 0.016251 | not DE   | not DE  |
| EVM0007817 | LG5 | probable ubiquitin-conjugati  | not DE   | not DE   | not DE   | not DE  |
| EVM0020749 | LG5 | probable xyloglucan endotran  | not DE   | not DE   | not DE   | not DE  |
| EVM0009176 | LG5 | probable xyloglucan endotran  | not DE   | not DE   | not DE   | not DE  |
| EVM0014560 | LG5 | probable xyloglucan endotran  | -3.50527 | 0.000373 | not DE   | not DE  |
| EVM0013277 | LG5 | probable zinc transporter 10  | not DE   | not DE   | not DE   | not DE  |
| EVM0014924 | LG5 | probably inactive leucine-ri  | not DE   | not DE   | not DE   | not DE  |
| EVM0006256 | LG5 | proline synthase co-transcri  | not DE   | not DE   | not DE   | not DE  |
| EVM0007627 | LG5 | protease Do-like 10, mitoch   | not DE   | not DE   | not DE   | not DE  |
| EVM0007846 | LG5 | protease Do-like 10, mitoch   | not DE   | not DE   | not DE   | not DE  |
| EVM0003791 | LG5 | protein CHUP1, chloroplasti   | not DE   | not DE   | not DE   | not DE  |
| EVM0011259 | LG5 | protein FAR-RED IMPAIRED RES  | not DE   | not DE   | not DE   | not DE  |
| EVM0018430 | LG5 | protein FAR-RED IMPAIRED RES  | not DE   | not DE   | not DE   | not DE  |
| EVM0008457 | LG5 | protein FAR-RED IMPAIRED RES  | not DE   | not DE   | not DE   | not DE  |
| EVM0006878 | LG5 | protein FAR1-RELATED SEQUENC  | not DE   | not DE   | not DE   | not DE  |
| EVM0002735 | LG5 | protein FEZ-like              | not DE   | not DE   | not DE   | not DE  |
| EVM0010325 | LG5 | protein IQ-DOMAIN 1-like isc  | not DE   | not DE   | not DE   | not DE  |
| EVM0022890 | LG5 | protein LSD1                  | not DE   | not DE   | not DE   | not DE  |
| EVM0006206 | LG5 | protein NAPI1-like            | not DE   | not DE   | not DE   | not DE  |
| EVM0010898 | LG5 | protein NDR1-like             | not DE   | not DE   | not DE   | not DE  |
| EVM0016828 | LG5 | protein OSB2, chloroplasti    | not DE   | not DE   | not DE   | not DE  |
| EVM0020882 | LG5 | protein PHLOEM PROTEIN 2-LIK  | not DE   | not DE   | 1.034453 | #####   |
| EVM0011013 | LG5 | protein PHLOEM PROTEIN 2-LIK  | not DE   | not DE   | 1.246618 | 0.02587 |
| EVM0012444 | LG5 | protein RALF-like 19          | not DE   | not DE   | not DE   | not DE  |
| EVM0013408 | LG5 | protein ROOT HAIR DEFECTIVE   | not DE   | not DE   | not DE   | not DE  |
| EVM0011018 | LG5 | protein SMG7L-like            | 1.693894 | 4.98E-05 | not DE   | not DE  |
| EVM0002720 | LG5 | protein SRG1                  | not DE   | not DE   | not DE   | not DE  |
| EVM0004620 | LG5 | protein SRG1                  | not DE   | not DE   | not DE   | not DE  |
| EVM0010652 | LG5 | protein SRG1                  | not DE   | not DE   | not DE   | not DE  |
| EVM0012913 | LG5 | protein SRG1                  | not DE   | not DE   | not DE   | not DE  |
| EVM0024382 | LG5 | protein SRG1                  | not DE   | not DE   | not DE   | not DE  |
| EVM0003385 | LG5 | protein SRG1-like             | not DE   | not DE   | not DE   | not DE  |

|            |     |                               |          |          |          |         |
|------------|-----|-------------------------------|----------|----------|----------|---------|
| EVM0013513 | LG5 | protein SRG1-like             | not DE   | not DE   | not DE   | not DE  |
| EVM0021405 | LG5 | protein SRG1-like             | not DE   | not DE   | not DE   | not DE  |
| EVM0013206 | LG5 | protein SRG1-like isoform X1  | not DE   | not DE   | not DE   | not DE  |
| EVM0011202 | LG5 | protein STICHEL-like 3-like   | not DE   | not DE   | not DE   | not DE  |
| EVM0014017 | LG5 | protein STRUBBELIG-RECEPTOR   | not DE   | not DE   | not DE   | not DE  |
| EVM0004475 | LG5 | protein STRUBBELIG-like       | not DE   | not DE   | not DE   | not DE  |
| EVM0022497 | LG5 | protein TRANSPARENT TESTA 12  | not DE   | not DE   | not DE   | not DE  |
| EVM0008358 | LG5 | protein WEAK CHLOROPLAST MOV  | not DE   | not DE   | not DE   | not DE  |
| EVM0018551 | LG5 | protein YLS9-like             | not DE   | not DE   | not DE   | not DE  |
| EVM0010416 | LG5 | protein rtoA-like             | not DE   | not DE   | not DE   | not DE  |
| EVM0022105 | LG5 | protein rtoA-like             | not DE   | not DE   | not DE   | not DE  |
| EVM0010455 | LG5 | protein transport protein Sen | not DE   | not DE   | not DE   | not DE  |
| EVM0024648 | LG5 | putative E3 ubiquitin-protein | not DE   | not DE   | not DE   | not DE  |
| EVM0023274 | LG5 | putative E3 ubiquitin-protein | not DE   | not DE   | not DE   | not DE  |
| EVM0018654 | LG5 | putative E3 ubiquitin-protein | not DE   | not DE   | not DE   | not DE  |
| EVM0003266 | LG5 | putative PAP-specific phosph  | not DE   | not DE   | not DE   | not DE  |
| EVM0000705 | LG5 | putative cysteine-rich recep  | 4.271371 | 0.00325  | not DE   | not DE  |
| EVM0010282 | LG5 | putative cysteine-rich recep  | not DE   | not DE   | not DE   | not DE  |
| EVM0019425 | LG5 | putative cysteine-rich recep  | not DE   | not DE   | not DE   | not DE  |
| EVM0005430 | LG5 | putative germin-like protein  | not DE   | not DE   | not DE   | not DE  |
| EVM0021287 | LG5 | putative germin-like protein  | not DE   | not DE   | not DE   | not DE  |
| EVM0012519 | LG5 | putative germin-like protein  | not DE   | not DE   | not DE   | not DE  |
| EVM0023917 | LG5 | putative hydrolase C777.06c-  | not DE   | not DE   | not DE   | not DE  |
| EVM0022662 | LG5 | putative leucine--tRNA ligas  | not DE   | not DE   | not DE   | not DE  |
| EVM0007623 | LG5 | putative leucine-rich repeat  | not DE   | not DE   | not DE   | not DE  |
| EVM0020706 | LG5 | putative leucine-rich repeat  | not DE   | not DE   | not DE   | not DE  |
| EVM0012380 | LG5 | putative phosphatidylinosit   | not DE   | not DE   | not DE   | not DE  |
| EVM0013000 | LG5 | putative secretory carrier-a  | not DE   | not DE   | not DE   | not DE  |
| EVM0021427 | LG5 | putative tyrosine-protein ph  | not DE   | not DE   | not DE   | not DE  |
| EVM0020445 | LG5 | putative vesicle-associated   | not DE   | not DE   | not DE   | not DE  |
| EVM0011091 | LG5 | pyruvate dehydrogenase E1 co  | not DE   | not DE   | not DE   | not DE  |
| EVM0008560 | LG5 | ras-related protein RAB1d-l   | not DE   | not DE   | not DE   | not DE  |
| EVM0023533 | LG5 | ras-related protein RAB1f-l   | not DE   | not DE   | not DE   | not DE  |
| EVM0009010 | LG5 | receptor-like protein kinase  | not DE   | not DE   | not DE   | not DE  |
| EVM0006388 | LG5 | receptor-like serine/threoni  | not DE   | not DE   | not DE   | not DE  |
| EVM0012984 | LG5 | receptor-like serine/threoni  | not DE   | not DE   | not DE   | not DE  |
| EVM0004944 | LG5 | reticuline oxidase-like prot  | not DE   | not DE   | not DE   | not DE  |
| EVM0009522 | LG5 | reticuline oxidase-like prot  | not DE   | not DE   | not DE   | not DE  |
| EVM0010532 | LG5 | reticuline oxidase-like prot  | not DE   | not DE   | not DE   | not DE  |
| EVM0023246 | LG5 | ribosomal RNA-processing pro  | not DE   | not DE   | not DE   | not DE  |
| EVM0000260 | LG5 | serine carboxypeptidase-like  | not DE   | not DE   | not DE   | not DE  |
| EVM0008063 | LG5 | serine hydroxymethyltransfer  | not DE   | not DE   | not DE   | not DE  |
| EVM0016978 | LG5 | serine/threonine-protein kin  | not DE   | not DE   | not DE   | not DE  |
| EVM0006442 | LG5 | serine/threonine-protein kin  | -1.2688  | 0.004577 | not DE   | not DE  |
| EVM0008218 | LG5 | serine/threonine-protein kin  | not DE   | not DE   | not DE   | not DE  |
| EVM0010245 | LG5 | serine/threonine-protein ph   | not DE   | not DE   | not DE   | not DE  |
| EVM0018217 | LG5 | shaggy-related protein kinas  | not DE   | not DE   | not DE   | not DE  |
| EVM0024185 | LG5 | shikimate 0-hydroxycinnamoyl  | not DE   | not DE   | not DE   | not DE  |
| EVM0012854 | LG5 | soluble starch synthase 3, c  | not DE   | not DE   | not DE   | not DE  |
| EVM0000573 | LG5 | sphingolipid delta(4)-desatu  | not DE   | not DE   | not DE   | not DE  |
| EVM0022052 | LG5 | splicing factor 3B subunit 2  | not DE   | not DE   | not DE   | not DE  |
| EVM0012352 | LG5 | subtilisin-like protease-lik  | not DE   | not DE   | not DE   | not DE  |
| EVM0008307 | LG5 | sugar transport protein 1-li  | not DE   | not DE   | -1.37943 | 0.01188 |
| EVM0003026 | LG5 | sugar transport protein 7-li  | not DE   | not DE   | not DE   | not DE  |

|            |     |                               |          |          |          |        |
|------------|-----|-------------------------------|----------|----------|----------|--------|
| EVM0000189 | LG5 | sulfiredoxin, chloroplastic/  | not DE   | not DE   | not DE   | not DE |
| EVM0000235 | LG5 | sulfiredoxin, chloroplastic/  | not DE   | not DE   | not DE   | not DE |
| EVM0004735 | LG5 | sulfiredoxin, chloroplastic/  | not DE   | not DE   | not DE   | not DE |
| EVM0000874 | LG5 | syntaxin-22-like isoform X1   | not DE   | not DE   | not DE   | not DE |
| EVM0000801 | LG5 | thioredoxin O2, mitochondria  | not DE   | not DE   | not DE   | not DE |
| EVM0003118 | LG5 | tobamovirus multiplication p  | not DE   | not DE   | not DE   | not DE |
| EVM0022765 | LG5 | trafficking protein particle  | not DE   | not DE   | not DE   | not DE |
| EVM0011992 | LG5 | transcription factor CPC-like | not DE   | not DE   | not DE   | not DE |
| EVM0004584 | LG5 | transcription factor GTE1-li  | not DE   | not DE   | not DE   | not DE |
| EVM0005556 | LG5 | transcription factor ILR3-li  | not DE   | not DE   | 1.366193 | #####  |
| EVM0013565 | LG5 | transcription factor VOZ1-li  | not DE   | not DE   | not DE   | not DE |
| EVM0016687 | LG5 | transcription factor bHLH112  | not DE   | not DE   | not DE   | not DE |
| EVM0001590 | LG5 | transforming growth factor-b  | not DE   | not DE   | not DE   | not DE |
| EVM0008213 | LG5 | transmembrane protein 56-B-1  | -1.18094 | 0.045626 | not DE   | not DE |
| EVM0006024 | LG5 | transposon Ty3-G Gag-Pol pol  | not DE   | not DE   | not DE   | not DE |
| EVM0004967 | LG5 | tubulin beta chain-like       | not DE   | not DE   | not DE   | not DE |
| EVM0022836 | LG5 | two-component response regul  | not DE   | not DE   | not DE   | not DE |
| EVM0004373 | LG5 | type II inositol 1,4,5-trisp  | not DE   | not DE   | not DE   | not DE |
| EVM0001911 | LG5 | tyrosine/DOPA decarboxylase   | not DE   | not DE   | not DE   | not DE |
| EVM0001170 | LG5 | ubiquinol oxidase 4, chlorop  | not DE   | not DE   | not DE   | not DE |
| EVM0009940 | LG5 | ubiquinol oxidase 4, chlorop  | not DE   | not DE   | not DE   | not DE |
| EVM0006159 | LG5 | ubiquitin carboxyl-terminal   | not DE   | not DE   | not DE   | not DE |
| EVM0001596 | LG5 | ubiquitin-like modifier-acti  | not DE   | not DE   | not DE   | not DE |
| EVM0006570 | LG5 | uncharacterized GPI-anchored  | not DE   | not DE   | not DE   | not DE |
| EVM0020092 | LG5 | uncharacterized GPI-anchored  | not DE   | not DE   | not DE   | not DE |
| EVM0015125 | LG5 | uncharacterized membrane pro  | not DE   | not DE   | not DE   | not DE |
| EVM0020769 | LG5 | uncharacterized membrane pro  | 1.743273 | 0.001843 | not DE   | not DE |
| EVM0022739 | LG5 | uncharacterized protein Atlg  | not DE   | not DE   | not DE   | not DE |
| EVM0001053 | LG5 | uncharacterized protein At4g  | not DE   | not DE   | not DE   | not DE |
| EVM0013182 | LG5 | uncharacterized protein At4g  | not DE   | not DE   | not DE   | not DE |
| EVM0002925 | LG5 | uncharacterized protein At4g  | not DE   | not DE   | not DE   | not DE |
| EVM0010530 | LG5 | uncharacterized protein At4g  | not DE   | not DE   | not DE   | not DE |
| EVM0019773 | LG5 | uncharacterized protein LOC1  | not DE   | not DE   | not DE   | not DE |
| EVM0010059 | LG5 | uncharacterized protein LOC1  | not DE   | not DE   | not DE   | not DE |
| EVM0009671 | LG5 | uncharacterized protein LOC1  | not DE   | not DE   | not DE   | not DE |
| EVM0001101 | LG5 | uncharacterized protein LOC1  | not DE   | not DE   | not DE   | not DE |
| EVM0005367 | LG5 | uncharacterized protein LOC1  | not DE   | not DE   | not DE   | not DE |
| EVM0004648 | LG5 | uncharacterized protein LOC1  | not DE   | not DE   | not DE   | not DE |
| EVM0009009 | LG5 | uncharacterized protein LOC1  | not DE   | not DE   | not DE   | not DE |
| EVM0010664 | LG5 | uncharacterized protein LOC1  | not DE   | not DE   | not DE   | not DE |
| EVM0015331 | LG5 | uncharacterized protein LOC1  | not DE   | not DE   | not DE   | not DE |
| EVM0006419 | LG5 | uncharacterized protein LOC1  | not DE   | not DE   | not DE   | not DE |
| EVM0018561 | LG5 | uncharacterized protein LOC1  | not DE   | not DE   | not DE   | not DE |
| EVM0022767 | LG5 | uncharacterized protein LOC1  | not DE   | not DE   | not DE   | not DE |
| EVM0004677 | LG5 | uncharacterized protein LOC1  | not DE   | not DE   | not DE   | not DE |
| EVM0002768 | LG5 | uncharacterized protein LOC1  | not DE   | not DE   | not DE   | not DE |
| EVM0004765 | LG5 | uncharacterized protein LOC1  | not DE   | not DE   | not DE   | not DE |
| EVM0014094 | LG5 | uncharacterized protein LOC1  | not DE   | not DE   | not DE   | not DE |
| EVM0021697 | LG5 | uncharacterized protein LOC1  | not DE   | not DE   | not DE   | not DE |
| EVM0012037 | LG5 | uncharacterized protein LOC1  | 2.173783 | 0.026066 | not DE   | not DE |
| EVM0016158 | LG5 | uncharacterized protein LOC1  | not DE   | not DE   | not DE   | not DE |
| EVM0011674 | LG5 | uncharacterized protein LOC1  | not DE   | not DE   | not DE   | not DE |
| EVM0023517 | LG5 | uncharacterized protein LOC1  | not DE   | not DE   | not DE   | not DE |
| EVM0013614 | LG5 | uncharacterized protein LOC1  | not DE   | not DE   | not DE   | not DE |

|            |     |                              |          |          |          |         |
|------------|-----|------------------------------|----------|----------|----------|---------|
| EVM0024431 | LG5 | uncharacterized protein LOC1 | not DE   | not DE   | not DE   | not DE  |
| EVM0008056 | LG5 | uncharacterized protein LOC1 | not DE   | not DE   | not DE   | not DE  |
| EVM0023554 | LG5 | uncharacterized protein LOC1 | not DE   | not DE   | not DE   | not DE  |
| EVM0003784 | LG5 | uncharacterized protein LOC1 | not DE   | not DE   | not DE   | not DE  |
| EVM0022783 | LG5 | uncharacterized protein LOC1 | not DE   | not DE   | not DE   | not DE  |
| EVM0007393 | LG5 | uncharacterized protein LOC1 | not DE   | not DE   | not DE   | not DE  |
| EVM0024651 | LG5 | uncharacterized protein LOC1 | not DE   | not DE   | not DE   | not DE  |
| EVM0011001 | LG5 | uncharacterized protein LOC1 | not DE   | not DE   | not DE   | not DE  |
| EVM0004856 | LG5 | uncharacterized protein LOC1 | not DE   | not DE   | not DE   | not DE  |
| EVM0001990 | LG5 | uncharacterized protein LOC1 | -1.40993 | 0.006514 | not DE   | not DE  |
| EVM0019707 | LG5 | uncharacterized protein LOC1 | not DE   | not DE   | not DE   | not DE  |
| EVM0006201 | LG5 | uncharacterized protein LOC1 | not DE   | not DE   | not DE   | not DE  |
| EVM0015952 | LG5 | uncharacterized protein LOC1 | not DE   | not DE   | not DE   | not DE  |
| EVM0020073 | LG5 | uncharacterized protein LOC1 | not DE   | not DE   | not DE   | not DE  |
| EVM0017895 | LG5 | uncharacterized protein LOC1 | not DE   | not DE   | not DE   | not DE  |
| EVM0018676 | LG5 | uncharacterized protein LOC1 | not DE   | not DE   | not DE   | not DE  |
| EVM0008617 | LG5 | uncharacterized protein LOC1 | not DE   | not DE   | not DE   | not DE  |
| EVM0004902 | LG5 | uncharacterized protein LOC1 | not DE   | not DE   | not DE   | not DE  |
| EVM0008712 | LG5 | uncharacterized protein LOC1 | not DE   | not DE   | not DE   | not DE  |
| EVM0010868 | LG5 | uncharacterized protein LOC1 | not DE   | not DE   | not DE   | not DE  |
| EVM0015420 | LG5 | uncharacterized protein LOC1 | not DE   | not DE   | not DE   | not DE  |
| EVM0012327 | LG5 | uncharacterized protein LOC1 | not DE   | not DE   | not DE   | not DE  |
| EVM0015666 | LG5 | uncharacterized protein LOC1 | not DE   | not DE   | not DE   | not DE  |
| EVM0011675 | LG5 | uncharacterized protein LOC1 | not DE   | not DE   | not DE   | not DE  |
| EVM0022588 | LG5 | uncharacterized protein LOC1 | not DE   | not DE   | not DE   | not DE  |
| EVM0022217 | LG5 | uncharacterized protein LOC1 | not DE   | not DE   | not DE   | not DE  |
| EVM0004734 | LG5 | uncharacterized protein LOC1 | not DE   | not DE   | not DE   | not DE  |
| EVM0016953 | LG5 | uncharacterized protein LOC1 | not DE   | not DE   | not DE   | not DE  |
| EVM0006718 | LG5 | uncharacterized protein LOC1 | not DE   | not DE   | not DE   | not DE  |
| EVM0017847 | LG5 | uncharacterized protein LOC1 | not DE   | not DE   | not DE   | not DE  |
| EVM0005156 | LG5 | uncharacterized protein LOC1 | not DE   | not DE   | not DE   | not DE  |
| EVM0011851 | LG5 | uncharacterized protein LOC1 | not DE   | not DE   | not DE   | not DE  |
| EVM0013102 | LG5 | uncharacterized protein LOC1 | not DE   | not DE   | not DE   | not DE  |
| EVM0024188 | LG5 | uncharacterized protein LOC1 | 1.178685 | 0.001427 | not DE   | not DE  |
| EVM0002527 | LG5 | uncharacterized protein LOC1 | not DE   | not DE   | not DE   | not DE  |
| EVM0023812 | LG5 | uncharacterized protein LOC1 | not DE   | not DE   | not DE   | not DE  |
| EVM0023822 | LG5 | uncharacterized protein LOC1 | not DE   | not DE   | not DE   | not DE  |
| EVM0008638 | LG5 | uncharacterized protein LOC1 | not DE   | not DE   | -1.06816 | 0.00134 |
| EVM0017457 | LG5 | uncharacterized protein LOC1 | not DE   | not DE   | not DE   | not DE  |
| EVM0011338 | LG5 | uncharacterized protein LOC1 | not DE   | not DE   | not DE   | not DE  |
| EVM0014200 | LG5 | uncharacterized protein LOC1 | not DE   | not DE   | not DE   | not DE  |
| EVM0014402 | LG5 | uncharacterized protein LOC1 | not DE   | not DE   | not DE   | not DE  |
| EVM0003930 | LG5 | uncharacterized protein LOC1 | -1.33148 | 0.019264 | not DE   | not DE  |
| EVM0011886 | LG5 | uncharacterized protein LOC1 | not DE   | not DE   | not DE   | not DE  |
| EVM0006684 | LG5 | uncharacterized protein LOC1 | not DE   | not DE   | not DE   | not DE  |
| EVM0000472 | LG5 | uncharacterized protein LOC1 | -2.6079  | 5.57E-08 | not DE   | not DE  |
| EVM0008883 | LG5 | uncharacterized protein LOC1 | not DE   | not DE   | not DE   | not DE  |
| EVM0012350 | LG5 | uncharacterized protein LOC1 | not DE   | not DE   | not DE   | not DE  |
| EVM0023393 | LG5 | uncharacterized protein LOC1 | 1.365604 | 0.00044  | not DE   | not DE  |
| EVM0019890 | LG5 | uncharacterized protein LOC1 | not DE   | not DE   | not DE   | not DE  |
| EVM0003282 | LG5 | uncharacterized protein LOC1 | not DE   | not DE   | not DE   | not DE  |
| EVM0007594 | LG5 | uncharacterized protein LOC1 | -1.24425 | 0.042321 | not DE   | not DE  |
| EVM0019373 | LG5 | uncharacterized protein LOC1 | not DE   | not DE   | not DE   | not DE  |
| EVM0022401 | LG5 | uncharacterized protein LOC1 | not DE   | not DE   | not DE   | not DE  |

|            |     |                              |        |        |          |         |
|------------|-----|------------------------------|--------|--------|----------|---------|
| EVM0009990 | LG5 | uncharacterized protein LOC1 | not DE | not DE | not DE   | not DE  |
| EVM0005574 | LG5 | uncharacterized protein LOC1 | not DE | not DE | 1.061634 | 0.0434  |
| EVM0018603 | LG5 | uncharacterized protein LOC1 | not DE | not DE | not DE   | not DE  |
| EVM0004153 | LG5 | uncharacterized protein LOC1 | not DE | not DE | not DE   | not DE  |
| EVM0019965 | LG5 | uncharacterized protein LOC1 | not DE | not DE | not DE   | not DE  |
| EVM0000842 | LG5 | uncharacterized protein LOC1 | not DE | not DE | not DE   | not DE  |
| EVM0015237 | LG5 | uncharacterized protein LOC1 | not DE | not DE | not DE   | not DE  |
| EVM0022050 | LG5 | uncharacterized protein LOC1 | not DE | not DE | -2.99692 | 0.00595 |
| EVM0003406 | LG5 | uncharacterized protein LOC1 | not DE | not DE | not DE   | not DE  |
| EVM0015233 | LG5 | uncharacterized protein LOC1 | not DE | not DE | not DE   | not DE  |
| EVM0006840 | LG5 | uncharacterized protein LOC1 | not DE | not DE | not DE   | not DE  |
| EVM0000654 | LG5 | uncharacterized protein LOC1 | not DE | not DE | -1.1291  | 0.00865 |
| EVM0003801 | LG5 | uncharacterized protein LOC1 | not DE | not DE | not DE   | not DE  |
| EVM0013067 | LG5 | uncharacterized protein LOC1 | not DE | not DE | not DE   | not DE  |
| EVM0001432 | LG5 | uncharacterized protein LOC1 | not DE | not DE | not DE   | not DE  |
| EVM0007600 | LG5 | uncharacterized protein LOC1 | not DE | not DE | not DE   | not DE  |
| EVM0023142 | LG5 | uncharacterized protein LOC1 | not DE | not DE | not DE   | not DE  |
| EVM0013403 | LG5 | uncharacterized protein LOC1 | not DE | not DE | not DE   | not DE  |
| EVM0001426 | LG5 | uncharacterized protein LOC1 | not DE | not DE | not DE   | not DE  |
| EVM0019807 | LG5 | uncharacterized protein LOC1 | not DE | not DE | not DE   | not DE  |
| EVM0006972 | LG5 | uncharacterized protein LOC1 | not DE | not DE | not DE   | not DE  |
| EVM0011678 | LG5 | uncharacterized protein LOC1 | not DE | not DE | not DE   | not DE  |
| EVM0023071 | LG5 | uncharacterized protein LOC1 | not DE | not DE | not DE   | not DE  |
| EVM0005323 | LG5 | uncharacterized protein LOC1 | not DE | not DE | not DE   | not DE  |
| EVM0016519 | LG5 | uncharacterized protein LOC1 | not DE | not DE | not DE   | not DE  |
| EVM0018200 | LG5 | uncharacterized protein LOC1 | not DE | not DE | not DE   | not DE  |
| EVM0007429 | LG5 | uncharacterized protein LOC1 | not DE | not DE | not DE   | not DE  |
| EVM0023455 | LG5 | uncharacterized protein LOC1 | not DE | not DE | not DE   | not DE  |
| EVM0012704 | LG5 | uncharacterized protein LOC1 | not DE | not DE | not DE   | not DE  |
| EVM0010698 | LG5 | uncharacterized protein LOC1 | not DE | not DE | not DE   | not DE  |
| EVM0007230 | LG5 | uncharacterized protein LOC1 | not DE | not DE | not DE   | not DE  |
| EVM0005108 | LG5 | uncharacterized protein LOC1 | not DE | not DE | not DE   | not DE  |
| EVM0015100 | LG5 | uncharacterized protein LOC1 | not DE | not DE | not DE   | not DE  |
| EVM0019535 | LG5 | uncharacterized protein LOC1 | not DE | not DE | not DE   | not DE  |
| EVM0020228 | LG5 | uncharacterized protein LOC1 | not DE | not DE | not DE   | not DE  |
| EVM0008363 | LG5 | uncharacterized protein LOC1 | not DE | not DE | not DE   | not DE  |
| EVM0013567 | LG5 | uncharacterized protein LOC1 | not DE | not DE | not DE   | not DE  |
| EVM0003302 | LG5 | uncharacterized protein LOC1 | not DE | not DE | not DE   | not DE  |
| EVM0019739 | LG5 | uncharacterized protein LOC1 | not DE | not DE | not DE   | not DE  |
| EVM0006440 | LG5 | uncharacterized protein LOC1 | not DE | not DE | not DE   | not DE  |
| EVM0007990 | LG5 | uncharacterized protein LOC1 | not DE | not DE | not DE   | not DE  |
| EVM0020807 | LG5 | uncharacterized protein LOC1 | not DE | not DE | -1.67043 | 0.00048 |
| EVM0018587 | LG5 | uncharacterized protein LOC1 | not DE | not DE | not DE   | not DE  |
| EVM0008435 | LG5 | uncharacterized protein LOC1 | not DE | not DE | not DE   | not DE  |
| EVM0011772 | LG5 | uncharacterized protein LOC1 | not DE | not DE | not DE   | not DE  |
| EVM0017663 | LG5 | uncharacterized protein LOC1 | not DE | not DE | not DE   | not DE  |
| EVM0004271 | LG5 | uncharacterized protein LOC1 | not DE | not DE | not DE   | not DE  |
| EVM0019169 | LG5 | uncharacterized protein LOC1 | not DE | not DE | not DE   | not DE  |
| EVM0010999 | LG5 | uncharacterized protein LOC1 | not DE | not DE | not DE   | not DE  |
| EVM0001865 | LG5 | uncharacterized protein LOC1 | not DE | not DE | not DE   | not DE  |
| EVM0001759 | LG5 | urease accessory protein D-1 | not DE | not DE | not DE   | not DE  |
| EVM0015425 | LG5 | urease accessory protein D-1 | not DE | not DE | not DE   | not DE  |
| EVM0019291 | LG5 | vacuolar iron transporter hc | not DE | not DE | not DE   | not DE  |
| EVM0015290 | LG5 | vacuolar protein sorting-ass | not DE | not DE | 1.87922  | 0.0015  |

|            |     |                                |          |          |          |         |
|------------|-----|--------------------------------|----------|----------|----------|---------|
| EVM0010090 | LG5 | vignain-like                   | not DE   | not DE   | not DE   | not DE  |
| EVM0018289 | LG5 | xyloglucan endotransglucosyl   | not DE   | not DE   | not DE   | not DE  |
| EVM0000682 | LG5 | zinc finger CCCH domain-cont   | not DE   | not DE   | not DE   | not DE  |
| EVM0018444 | LG5 | zinc finger CCCH domain-cont   | not DE   | not DE   | not DE   | not DE  |
| EVM0019086 | LG5 | zinc finger CCCH domain-cont   | not DE   | not DE   | not DE   | not DE  |
| EVM0002594 | LG5 | zinc finger protein 2-like     | not DE   | not DE   | not DE   | not DE  |
| EVM0008792 | LG5 | zingipain-2-like               | not DE   | not DE   | -2.65707 | 0.02422 |
| EVM0002360 | LG5 | 1,6-rhamnosyltransferase       | not DE   | not DE   | not DE   | not DE  |
| EVM0022152 | LG5 | 1,6-rhamnosyltransferase       | not DE   | not DE   | not DE   | not DE  |
| EVM0003446 | LG5 | 20S proteasome alpha subunit   | not DE   | not DE   | not DE   | not DE  |
| EVM0005758 | LG5 | 20S proteasome alpha subunit   | not DE   | not DE   | not DE   | not DE  |
| EVM0009982 | LG5 | 40S ribosomal protein S5, put  | not DE   | not DE   | not DE   | not DE  |
| EVM0000467 | LG5 | 60S ribosomal protein L32, pu  | not DE   | not DE   | not DE   | not DE  |
| EVM0000034 | LG5 | ADP-ribosylation factor 3 isc  | not DE   | not DE   | not DE   | not DE  |
| EVM0019360 | LG5 | AFG1-like ATPase family prote  | not DE   | not DE   | not DE   | not DE  |
| EVM0011093 | LG5 | AICARFT/IMPCHase bienzyme fam  | not DE   | not DE   | not DE   | not DE  |
| EVM0002157 | LG5 | AP2/B3-like transcriptional f  | not DE   | not DE   | not DE   | not DE  |
| EVM0001099 | LG5 | ATP synthase CF0 subunit I (c  | -2.50569 | 0.011724 | not DE   | not DE  |
| EVM0020295 | LG5 | ATPase 6 family protein        | not DE   | not DE   | not DE   | not DE  |
| EVM0007086 | LG5 | Agamous-like MADS-box protein  | not DE   | not DE   | not DE   | not DE  |
| EVM0016690 | LG5 | Agamous-like MADS-box protein  | not DE   | not DE   | not DE   | not DE  |
| EVM0019811 | LG5 | Agamous-like MADS-box protein  | not DE   | not DE   | not DE   | not DE  |
| EVM0015368 | LG5 | Aldolase-type TIM barrel fami  | not DE   | not DE   | not DE   | not DE  |
| EVM0000096 | LG5 | Alpha-mannosidase 3 isoform l  | not DE   | not DE   | not DE   | not DE  |
| EVM0010650 | LG5 | Alpha/beta-Hydrolases superfam | not DE   | not DE   | not DE   | not DE  |
| EVM0013802 | LG5 | Alpha/beta-Hydrolases superfam | not DE   | not DE   | not DE   | not DE  |
| EVM0020744 | LG5 | Ankyrin repeat-containing pro  | not DE   | not DE   | not DE   | not DE  |
| EVM0002741 | LG5 | Aquaporin NIP1.1, putative     | not DE   | not DE   | not DE   | not DE  |
| EVM0005153 | LG5 | Aquaporin NIP1.1, putative     | not DE   | not DE   | not DE   | not DE  |
| EVM0005726 | LG5 | Aquaporin NIP1.1, putative     | not DE   | not DE   | not DE   | not DE  |
| EVM0005899 | LG5 | Aquaporin NIP1.1, putative     | not DE   | not DE   | not DE   | not DE  |
| EVM0008125 | LG5 | Aquaporin NIP1.1, putative     | not DE   | not DE   | not DE   | not DE  |
| EVM0008598 | LG5 | Aquaporin NIP1.1, putative     | not DE   | not DE   | not DE   | not DE  |
| EVM0009024 | LG5 | Aquaporin NIP1.1, putative     | not DE   | not DE   | not DE   | not DE  |
| EVM0011984 | LG5 | Aquaporin NIP1.1, putative     | not DE   | not DE   | not DE   | not DE  |
| EVM0012007 | LG5 | Aquaporin NIP1.1, putative     | not DE   | not DE   | not DE   | not DE  |
| EVM0012468 | LG5 | Aquaporin NIP1.1, putative     | not DE   | not DE   | not DE   | not DE  |
| EVM0012567 | LG5 | Aquaporin NIP1.1, putative     | not DE   | not DE   | not DE   | not DE  |
| EVM0013927 | LG5 | Aquaporin NIP1.1, putative     | -1.04899 | 0.005517 | not DE   | not DE  |
| EVM0015027 | LG5 | Aquaporin NIP1.1, putative     | not DE   | not DE   | not DE   | not DE  |
| EVM0021698 | LG5 | Aquaporin NIP1.1, putative     | not DE   | not DE   | not DE   | not DE  |
| EVM0022774 | LG5 | Aquaporin NIP1.1, putative     | not DE   | not DE   | not DE   | not DE  |
| EVM0016000 | LG5 | At4g21310p-like protein        | not DE   | not DE   | not DE   | not DE  |
| EVM0011764 | LG5 | Auxin-responsive family prote  | not DE   | not DE   | not DE   | not DE  |
| EVM0001059 | LG5 | B-cell receptor-associated 31  | not DE   | not DE   | not DE   | not DE  |
| EVM0008892 | LG5 | BZIP domain class transcripti  | not DE   | not DE   | not DE   | not DE  |
| EVM0003780 | LG5 | Beta-glucosidase G4            | not DE   | not DE   | not DE   | not DE  |
| EVM0005195 | LG5 | Beta-lactamase-like protein E  | not DE   | not DE   | not DE   | not DE  |
| EVM0021399 | LG5 | Beta-lactamase-like protein E  | not DE   | not DE   | not DE   | not DE  |
| EVM0005897 | LG5 | BnaC07g35050D                  | not DE   | not DE   | not DE   | not DE  |
| EVM0002528 | LG5 | Brain 44                       | not DE   | not DE   | not DE   | not DE  |
| EVM0006532 | LG5 | C-terminal cysteine residue i  | 1.304596 | 0.009698 | not DE   | not DE  |
| EVM0010458 | LG5 | CBL-interacting protein kinas  | not DE   | not DE   | 1.185951 | 0.04496 |
| EVM0018434 | LG5 | CBL-interacting protein kinas  | not DE   | not DE   | not DE   | not DE  |

|            |     |                                    |          |          |          |         |
|------------|-----|------------------------------------|----------|----------|----------|---------|
| EVM0008018 | LG5 | CBL-interacting serine/threonine   | not DE   | not DE   | not DE   | not DE  |
| EVM0007822 | LG5 | CONSTANS-like protein              | not DE   | not DE   | not DE   | not DE  |
| EVM0024439 | LG5 | Cak assembly factor, putative      | not DE   | not DE   | not DE   | not DE  |
| EVM0017469 | LG5 | Carbohydrate-binding X8 domain     | not DE   | not DE   | not DE   | not DE  |
| EVM0004428 | LG5 | Cationic amino acid transporter    | not DE   | not DE   | not DE   | not DE  |
| EVM0023583 | LG5 | Cationic amino acid transporter    | not DE   | not DE   | not DE   | not DE  |
| EVM0009140 | LG5 | Chlororespiratory reduction 6      | not DE   | not DE   | not DE   | not DE  |
| EVM0017013 | LG5 | Copper-exporting ATPase / res      | not DE   | not DE   | not DE   | not DE  |
| EVM0007458 | LG5 | Cysteine-rich RLK 30, putative     | not DE   | not DE   | not DE   | not DE  |
| EVM0008632 | LG5 | Cysteine-rich RLK 34, putative     | not DE   | not DE   | not DE   | not DE  |
| EVM0018125 | LG5 | Cysteine-rich RLK 34, putative     | not DE   | not DE   | not DE   | not DE  |
| EVM0012431 | LG5 | Cytochrome P450, family 710,       | not DE   | not DE   | not DE   | not DE  |
| EVM0015912 | LG5 | Cytochrome c oxidase subunit       | not DE   | not DE   | not DE   | not DE  |
| EVM0006320 | LG5 | DNA/RNA polymerases superfamily    | not DE   | not DE   | not DE   | not DE  |
| EVM0019242 | LG5 | DNA/RNA polymerases superfamily    | not DE   | not DE   | not DE   | not DE  |
| EVM0021496 | LG5 | DNA/RNA polymerases superfamily    | not DE   | not DE   | not DE   | not DE  |
| EVM0018577 | LG5 | Dehydrogenase/reductase SDR family | not DE   | not DE   | not DE   | not DE  |
| EVM0000428 | LG5 | Delay of germination 1, putative   | not DE   | not DE   | not DE   | not DE  |
| EVM0019418 | LG5 | Delay of germination 1, putative   | not DE   | not DE   | not DE   | not DE  |
| EVM0002211 | LG5 | Dof-domain transcription factor    | not DE   | not DE   | not DE   | not DE  |
| EVM0002385 | LG5 | Drought-responsive family protein  | not DE   | not DE   | not DE   | not DE  |
| EVM0024214 | LG5 | EXORDIUM like 1                    | not DE   | not DE   | 2.41336  | #####   |
| EVM0001448 | LG5 | Early nodulin-like protein 15      | not DE   | not DE   | not DE   | not DE  |
| EVM0001073 | LG5 | F-box family protein, putative     | not DE   | not DE   | not DE   | not DE  |
| EVM0003940 | LG5 | F-box family protein, putative     | not DE   | not DE   | not DE   | not DE  |
| EVM0005401 | LG5 | FAD-binding domain-containing      | not DE   | not DE   | not DE   | not DE  |
| EVM0013791 | LG5 | FAD-binding domain-containing      | not DE   | not DE   | not DE   | not DE  |
| EVM0006183 | LG5 | Fasciclin-like arabinogalactan     | not DE   | not DE   | not DE   | not DE  |
| EVM0011608 | LG5 | Fimbriata                          | not DE   | not DE   | not DE   | not DE  |
| EVM0006755 | LG5 | Glucan endo-1,3-beta-glucosidase   | not DE   | not DE   | not DE   | not DE  |
| EVM0009036 | LG5 | Glucan endo-1,3-beta-glucosidase   | not DE   | not DE   | not DE   | not DE  |
| EVM0000934 | LG5 | Glutamate receptor 2.8, putative   | not DE   | not DE   | not DE   | not DE  |
| EVM0006825 | LG5 | Glycolipid transfer protein (      | not DE   | not DE   | not DE   | not DE  |
| EVM0016555 | LG5 | Heat shock 70 kDa protein          | -2.85972 | 0.040259 | -3.82846 | #####   |
| EVM0007795 | LG5 | Histone deacetylase 1 isoform      | not DE   | not DE   | not DE   | not DE  |
| EVM0018737 | LG5 | Histone deacetylase 1 isoform      | not DE   | not DE   | not DE   | not DE  |
| EVM0013139 | LG5 | Homeobox-3, putative               | not DE   | not DE   | not DE   | not DE  |
| EVM0021895 | LG5 | Hydroxycinnamoyl CoA shikimate     | not DE   | not DE   | not DE   | not DE  |
| EVM0008609 | LG5 | Inositol transporter 2 isoform     | not DE   | not DE   | not DE   | not DE  |
| EVM0009583 | LG5 | JHL23J11.6                         | not DE   | not DE   | not DE   | not DE  |
| EVM0000708 | LG5 | Jasmonate-zim-domain protein       | not DE   | not DE   | not DE   | not DE  |
| EVM0013090 | LG5 | K-box region and MADS-box tran     | not DE   | not DE   | not DE   | not DE  |
| EVM0009318 | LG5 | Katanin p60 ATPase-containing      | not DE   | not DE   | not DE   | not DE  |
| EVM0007701 | LG5 | LOB domain-containing 4 -like      | not DE   | not DE   | not DE   | not DE  |
| EVM0002513 | LG5 | Leucine-rich repeat protein kinase | not DE   | not DE   | not DE   | not DE  |
| EVM0017030 | LG5 | Leucine-rich repeat protein kinase | not DE   | not DE   | not DE   | not DE  |
| EVM0010350 | LG5 | Leucine-rich repeat/extensin       | not DE   | not DE   | not DE   | not DE  |
| EVM0003391 | LG5 | MATE efflux family protein iso     | not DE   | not DE   | not DE   | not DE  |
| EVM0021843 | LG5 | Major facilitator superfamily      | not DE   | not DE   | not DE   | not DE  |
| EVM0004514 | LG5 | Major facilitator superfamily      | not DE   | not DE   | not DE   | not DE  |
| EVM0012598 | LG5 | Mediator of RNA polymerase II      | -1.43951 | 0.005805 | not DE   | not DE  |
| EVM0009552 | LG5 | Mediator of RNA polymerase II      | 1.005308 | 0.024988 | not DE   | not DE  |
| EVM0023516 | LG5 | Minor allergen Alt a, putative     | not DE   | not DE   | 1.076781 | 0.03995 |
| EVM0023846 | LG5 | Myb domain protein 36              | not DE   | not DE   | not DE   | not DE  |

|            |     |                               |          |          |          |        |
|------------|-----|-------------------------------|----------|----------|----------|--------|
| EVM0002106 | LG5 | Myb-like HTH transcriptional  | not DE   | not DE   | not DE   | not DE |
| EVM0010463 | LG5 | Myb-like HTH transcriptional  | not DE   | not DE   | not DE   | not DE |
| EVM0005886 | LG5 | N-acetylserotonin O-methyltra | not DE   | not DE   | -1.18659 | 0.0079 |
| EVM0016722 | LG5 | NAC domain containing protein | not DE   | not DE   | not DE   | not DE |
| EVM0010877 | LG5 | NAD(P)-binding Rossmann-fold  | not DE   | not DE   | not DE   | not DE |
| EVM0017876 | LG5 | NTF2-like                     | not DE   | not DE   | not DE   | not DE |
| EVM0001642 | LG5 | Na+/Pi symporter              | not DE   | not DE   | not DE   | not DE |
| EVM0003151 | LG5 | Non-intrinsic ABC protein 10  | not DE   | not DE   | not DE   | not DE |
| EVM0008623 | LG5 | Olee1-like protein            | not DE   | not DE   | not DE   | not DE |
| EVM0001826 | LG5 | PROHIBITIN 2 family protein   | not DE   | not DE   | not DE   | not DE |
| EVM0005591 | LG5 | PYR1-like 11                  | not DE   | not DE   | not DE   | not DE |
| EVM0020432 | LG5 | PYR1-like 11                  | not DE   | not DE   | not DE   | not DE |
| EVM0008349 | LG5 | Pectin lyase-like superfamily | not DE   | not DE   | not DE   | not DE |
| EVM0024141 | LG5 | Peroxidase 27 precursor, puta | not DE   | not DE   | not DE   | not DE |
| EVM0009080 | LG5 | Phosphoribosylformylglycinami | not DE   | not DE   | not DE   | not DE |
| EVM0002943 | LG5 | Phosphosulfolactate synthase  | -1.77073 | 2.40E-10 | not DE   | not DE |
| EVM0018208 | LG5 | Phytochrome E isoform 1       | not DE   | not DE   | not DE   | not DE |
| EVM0009500 | LG5 | Potassium transporter 1 isofc | not DE   | not DE   | not DE   | not DE |
| EVM0011114 | LG5 | Protein TRANSPARENT TESTA 12  | -2.2982  | 0.048023 | not DE   | not DE |
| EVM0008092 | LG5 | Protodermal factor 2 isoform  | not DE   | not DE   | not DE   | not DE |
| EVM0012268 | LG5 | Purine permease 10 isoform 1  | not DE   | not DE   | not DE   | not DE |
| EVM0017063 | LG5 | Putative xyloglucan endotrans | not DE   | not DE   | not DE   | not DE |
| EVM0024489 | LG5 | Putative xyloglucan endotrans | not DE   | not DE   | not DE   | not DE |
| EVM0003464 | LG5 | Pyrophosphate--fructose 6-pho | not DE   | not DE   | not DE   | not DE |
| EVM0021723 | LG5 | Pyrophosphate--fructose 6-pho | not DE   | not DE   | not DE   | not DE |
| EVM0002185 | LG5 | RAB geranylgeranyl transferas | not DE   | not DE   | not DE   | not DE |
| EVM0009926 | LG5 | RING/U-box superfamily protei | not DE   | not DE   | not DE   | not DE |
| EVM0014866 | LG5 | RING/U-box superfamily protei | not DE   | not DE   | not DE   | not DE |
| EVM0000841 | LG5 | RNA polymerase II ctd phospho | not DE   | not DE   | not DE   | not DE |
| EVM0002628 | LG5 | RNI superfamily protein       | not DE   | not DE   | not DE   | not DE |
| EVM0020331 | LG5 | RNI superfamily protein       | not DE   | not DE   | not DE   | not DE |
| EVM0018414 | LG5 | Receptor kinase 3             | not DE   | not DE   | not DE   | not DE |
| EVM0017897 | LG5 | Receptor-like protein kinase  | not DE   | not DE   | not DE   | not DE |
| EVM0006630 | LG5 | Reticulon family protein, put | not DE   | not DE   | not DE   | not DE |
| EVM0014546 | LG5 | Rhythmically-expressed protei | not DE   | not DE   | not DE   | not DE |
| EVM0016743 | LG5 | Rhythmically-expressed protei | not DE   | not DE   | not DE   | not DE |
| EVM0017449 | LG5 | Ribosomal protein L6 family p | not DE   | not DE   | not DE   | not DE |
| EVM0000088 | LG5 | S-locus lectin protein kinase | not DE   | not DE   | not DE   | not DE |
| EVM0021607 | LG5 | S-locus lectin protein kinase | not DE   | not DE   | not DE   | not DE |
| EVM0007265 | LG5 | SLAC1, putative               | not DE   | not DE   | not DE   | not DE |
| EVM0000031 | LG5 | SUPPRESSOR OF FRI4            | not DE   | not DE   | not DE   | not DE |
| EVM0013876 | LG5 | Senescence-related gene 1     | not DE   | not DE   | not DE   | not DE |
| EVM0015904 | LG5 | Senescence-related gene 1     | not DE   | not DE   | not DE   | not DE |
| EVM0023132 | LG5 | Serine carboxypeptidase-like  | not DE   | not DE   | not DE   | not DE |
| EVM0014888 | LG5 | Serine-rich protein-related   | not DE   | not DE   | not DE   | not DE |
| EVM0010847 | LG5 | Seven transmembrane MLO famil | not DE   | not DE   | not DE   | not DE |
| EVM0000491 | LG5 | Signal recognition particle r | not DE   | not DE   | not DE   | not DE |
| EVM0013738 | LG5 | Sodium/calcium exchanger fami | not DE   | not DE   | not DE   | not DE |
| EVM0003434 | LG5 | Squamosa promoter binding pro | not DE   | not DE   | not DE   | not DE |
| EVM0013972 | LG5 | Syntaxin of plants 124        | not DE   | not DE   | not DE   | not DE |
| EVM0014828 | LG5 | Tetraspanin family protein, p | not DE   | not DE   | not DE   | not DE |
| EVM0014948 | LG5 | Tetraspanin8                  | 4.913325 | 3.98E-05 | not DE   | not DE |
| EVM0007460 | LG5 | Tetratricopeptide repeat (TPR | not DE   | not DE   | not DE   | not DE |
| EVM0017142 | LG5 | Thiamine thiazole synthase 2, | not DE   | not DE   | not DE   | not DE |



|            |     |                               |          |          |          |         |
|------------|-----|-------------------------------|----------|----------|----------|---------|
| EVM0003759 | LG5 | Toprim domain-containing prot | not DE   | not DE   | not DE   | not DE  |
| EVM0002461 | LG5 | Transcription factor-related, | not DE   | not DE   | not DE   | not DE  |
| EVM0011084 | LG5 | Transcription factor-related, | not DE   | not DE   | not DE   | not DE  |
| EVM0017981 | LG5 | Transducin/WD40 repeat-like s | not DE   | not DE   | not DE   | not DE  |
| EVM0021595 | LG5 | Type-b response regulator, pu | not DE   | not DE   | not DE   | not DE  |
| EVM0002685 | LG5 | UDP-glucosyl transferase 85A2 | -2.39935 | 0.002705 | not DE   | not DE  |
| EVM0019512 | LG5 | UDP-glucosyl transferase 85A2 | not DE   | not DE   | not DE   | not DE  |
| EVM0023441 | LG5 | UDP-glucosyl transferase 85A2 | not DE   | not DE   | not DE   | not DE  |
| EVM0006380 | LG5 | UDP-glycosyltransferase 2     | not DE   | not DE   | not DE   | not DE  |
| EVM0022674 | LG5 | UDP-glycosyltransferase 2     | not DE   | not DE   | not DE   | not DE  |
| EVM0008691 | LG5 | UPF0051 protein ABCI8         | not DE   | not DE   | not DE   | not DE  |
| EVM0014278 | LG5 | Ubiquitin domain-containing p | not DE   | not DE   | not DE   | not DE  |
| EVM0023911 | LG5 | Ubiquitin-like superfamily pr | not DE   | not DE   | not DE   | not DE  |
| EVM0007397 | LG5 | Uncharacterized protein TCM_C | not DE   | not DE   | not DE   | not DE  |
| EVM0011133 | LG5 | Uncharacterized protein TCM_C | not DE   | not DE   | not DE   | not DE  |
| EVM0004404 | LG5 | Uncharacterized protein TCM_C | not DE   | not DE   | not DE   | not DE  |
| EVM0015192 | LG5 | Uncharacterized protein TCM_C | not DE   | not DE   | not DE   | not DE  |
| EVM0012580 | LG5 | Uncharacterized protein TCM_C | not DE   | not DE   | not DE   | not DE  |
| EVM0013995 | LG5 | Uncharacterized protein TCM_C | not DE   | not DE   | 1.911057 | 0.00078 |
| EVM0009880 | LG5 | Uncharacterized protein TCM_C | not DE   | not DE   | not DE   | not DE  |
| EVM0015458 | LG5 | Uncharacterized protein TCM_C | not DE   | not DE   | not DE   | not DE  |
| EVM0024209 | LG5 | Uncharacterized protein TCM_C | not DE   | not DE   | not DE   | not DE  |
| EVM0016239 | LG5 | Uncharacterized protein TCM_C | not DE   | not DE   | 1.257186 | 0.01639 |
| EVM0023336 | LG5 | Uncharacterized protein TCM_C | not DE   | not DE   | not DE   | not DE  |
| EVM0013143 | LG5 | Uncharacterized protein TCM_C | not DE   | not DE   | not DE   | not DE  |
| EVM0004352 | LG5 | Uncharacterized protein TCM_C | not DE   | not DE   | not DE   | not DE  |
| EVM0013291 | LG5 | Uncharacterized protein TCM_C | not DE   | not DE   | not DE   | not DE  |
| EVM0013407 | LG5 | VQ motif-containing protein,  | not DE   | not DE   | not DE   | not DE  |
| EVM0023174 | LG5 | Vesicle-associated 4-2 -like  | not DE   | not DE   | not DE   | not DE  |
| EVM0001753 | LG5 | WD repeat domain phosphoinosi | not DE   | not DE   | not DE   | not DE  |
| EVM0013194 | LG5 | WRKY DNA-binding protein 65,  | not DE   | not DE   | not DE   | not DE  |
| EVM0004495 | LG5 | WRKY family transcription fac | 2.354509 | 0.030448 | not DE   | not DE  |
| EVM0012322 | LG5 | WRKY transcription factor 14- | not DE   | not DE   | not DE   | not DE  |
| EVM0005716 | LG5 | WRKY29                        | 2.151327 | 0.003077 | not DE   | not DE  |
| EVM0001276 | LG5 | Xylem bark cysteine peptidase | 3.565445 | 2.09E-05 | 4.978134 | 0.00395 |
| EVM0001908 | LG5 | Xylem bark cysteine peptidase | not DE   | not DE   | not DE   | not DE  |
| EVM0024092 | LG5 | Xyloglucan endotransglucosyla | not DE   | not DE   | not DE   | not DE  |
| EVM0011177 | LG5 | Xyloglucan endotransglucosyla | not DE   | not DE   | not DE   | not DE  |
| EVM0024111 | LG5 | Xylose isomerase family prote | not DE   | not DE   | not DE   | not DE  |
| EVM0010706 | LG5 | Zinc finger C-x8-C-x5-C-x3-H  | not DE   | not DE   | not DE   | not DE  |
| EVM0008731 | LG5 | anthocyanidin reductase       | not DE   | not DE   | not DE   | not DE  |
| EVM0005081 | LG5 | argonaute 2                   | not DE   | not DE   | not DE   | not DE  |
| EVM0014575 | LG5 | auxin response factor         | not DE   | not DE   | not DE   | not DE  |
| EVM0008058 | LG5 | bifunctional purine biosynthe | not DE   | not DE   | -1.28722 | 0.00686 |
| EVM0018123 | LG5 | bifunctional purine biosynthe | not DE   | not DE   | not DE   | not DE  |
| EVM0008282 | LG5 | cation-chloride cotransporter | not DE   | not DE   | not DE   | not DE  |
| EVM0009299 | LG5 | chlorophyll A/B binding prote | -5.61966 | 5.85E-09 | not DE   | not DE  |
| EVM0016797 | LG5 | chlorophyll A/B binding prote | -3.31578 | 0.000155 | not DE   | not DE  |
| EVM0002702 | LG5 | conserved hypothetical protei | not DE   | not DE   | not DE   | not DE  |
| EVM0002796 | LG5 | conserved hypothetical protei | not DE   | not DE   | not DE   | not DE  |
| EVM0005462 | LG5 | conserved hypothetical protei | not DE   | not DE   | not DE   | not DE  |
| EVM0005508 | LG5 | conserved hypothetical protei | not DE   | not DE   | not DE   | not DE  |
| EVM0005787 | LG5 | conserved hypothetical protei | not DE   | not DE   | 1.841131 | 0.00206 |
| EVM0010296 | LG5 | conserved hypothetical protei | not DE   | not DE   | not DE   | not DE  |

|            |     |                                   |          |          |          |         |
|------------|-----|-----------------------------------|----------|----------|----------|---------|
| EVM0011516 | LG5 | conserved hypothetical protein    | not DE   | not DE   | not DE   | not DE  |
| EVM0012112 | LG5 | conserved hypothetical protein    | not DE   | not DE   | not DE   | not DE  |
| EVM0013745 | LG5 | conserved hypothetical protein    | not DE   | not DE   | not DE   | not DE  |
| EVM0014678 | LG5 | conserved hypothetical protein    | not DE   | not DE   | not DE   | not DE  |
| EVM0014688 | LG5 | conserved hypothetical protein    | not DE   | not DE   | not DE   | not DE  |
| EVM0019474 | LG5 | conserved hypothetical protein    | not DE   | not DE   | not DE   | not DE  |
| EVM0020974 | LG5 | conserved hypothetical protein    | not DE   | not DE   | not DE   | not DE  |
| EVM0021291 | LG5 | conserved hypothetical protein    | not DE   | not DE   | not DE   | not DE  |
| EVM0021694 | LG5 | conserved hypothetical protein    | not DE   | not DE   | not DE   | not DE  |
| EVM0023494 | LG5 | conserved hypothetical protein    | not DE   | not DE   | not DE   | not DE  |
| EVM0021554 | LG5 | copia LTR rider                   | not DE   | not DE   | not DE   | not DE  |
| EVM0008820 | LG5 | cysteine protease, putative       | not DE   | not DE   | not DE   | not DE  |
| EVM0017424 | LG5 | endo-1,4-beta-glucanase           | not DE   | not DE   | not DE   | not DE  |
| EVM0016307 | LG5 | eukaryotic translation initiation | not DE   | not DE   | not DE   | not DE  |
| EVM0006045 | LG5 | exocyst complex subunit SEC6,     | not DE   | not DE   | not DE   | not DE  |
| EVM0015448 | LG5 | ferredoxin--NADP reductase, p     | not DE   | not DE   | not DE   | not DE  |
| EVM0008498 | LG5 | gag/pol protein                   | not DE   | not DE   | not DE   | not DE  |
| EVM0018709 | LG5 | geranyl diphosphate synthase      | not DE   | not DE   | not DE   | not DE  |
| EVM0007439 | LG5 | gibberellin 20-oxidase family     | not DE   | not DE   | not DE   | not DE  |
| EVM0003912 | LG5 | gibberellin 20-oxidase, putat     | not DE   | not DE   | not DE   | not DE  |
| EVM0017122 | LG5 | gibberellin 20-oxidase, putat     | not DE   | not DE   | not DE   | not DE  |
| EVM0000196 | LG5 | glutamine amidotransferase cl     | not DE   | not DE   | not DE   | not DE  |
| EVM0019727 | LG5 | glutamine amidotransferase cl     | not DE   | not DE   | not DE   | not DE  |
| EVM0012338 | LG5 | glycosyl hydrolase family 17      | 4.900488 | 0.000242 | not DE   | not DE  |
| EVM0003422 | LG5 | glyoxalase I homolog family p     | not DE   | not DE   | not DE   | not DE  |
| EVM0005154 | LG5 | homeobox protein knotted-1, p     | not DE   | not DE   | not DE   | not DE  |
| EVM0023349 | LG5 | homeobox protein knotted-1, p     | not DE   | not DE   | not DE   | not DE  |
| EVM0010075 | LG5 | hypothetical protein              | not DE   | not DE   | not DE   | not DE  |
| EVM0000968 | LG5 | hypothetical protein AMTR_s03     | not DE   | not DE   | not DE   | not DE  |
| EVM0008468 | LG5 | hypothetical protein AMTR_s03     | not DE   | not DE   | not DE   | not DE  |
| EVM0007434 | LG5 | hypothetical protein AMTR_s04     | not DE   | not DE   | not DE   | not DE  |
| EVM0017645 | LG5 | hypothetical protein CICLE_v1     | not DE   | not DE   | not DE   | not DE  |
| EVM0016967 | LG5 | hypothetical protein CICLE_v1     | not DE   | not DE   | not DE   | not DE  |
| EVM0022923 | LG5 | hypothetical protein CICLE_v1     | not DE   | not DE   | not DE   | not DE  |
| EVM0000084 | LG5 | hypothetical protein CICLE_v1     | not DE   | not DE   | not DE   | not DE  |
| EVM0023776 | LG5 | hypothetical protein CICLE_v1     | 1.378057 | 0.004675 | 1.652264 | 0.00065 |
| EVM0013665 | LG5 | hypothetical protein CICLE_v1     | not DE   | not DE   | not DE   | not DE  |
| EVM0023998 | LG5 | hypothetical protein CICLE_v1     | not DE   | not DE   | not DE   | not DE  |
| EVM0012742 | LG5 | hypothetical protein CICLE_v1     | not DE   | not DE   | not DE   | not DE  |
| EVM0009910 | LG5 | hypothetical protein CICLE_v1     | not DE   | not DE   | not DE   | not DE  |
| EVM0021369 | LG5 | hypothetical protein CICLE_v1     | not DE   | not DE   | not DE   | not DE  |
| EVM0000341 | LG5 | hypothetical protein CICLE_v1     | not DE   | not DE   | -1.60238 | 0.00411 |
| EVM0000122 | LG5 | hypothetical protein CICLE_v1     | not DE   | not DE   | not DE   | not DE  |
| EVM0010287 | LG5 | hypothetical protein CICLE_v1     | not DE   | not DE   | not DE   | not DE  |
| EVM0017969 | LG5 | hypothetical protein CICLE_v1     | 1.004861 | 0.007633 | not DE   | not DE  |
| EVM0011892 | LG5 | hypothetical protein CICLE_v1     | not DE   | not DE   | not DE   | not DE  |
| EVM0015738 | LG5 | hypothetical protein CICLE_v1     | not DE   | not DE   | not DE   | not DE  |
| EVM0022647 | LG5 | hypothetical protein CICLE_v1     | -1.02001 | 0.000824 | not DE   | not DE  |
| EVM0004871 | LG5 | hypothetical protein CICLE_v1     | not DE   | not DE   | not DE   | not DE  |
| EVM0017494 | LG5 | hypothetical protein CICLE_v1     | not DE   | not DE   | not DE   | not DE  |
| EVM0008544 | LG5 | hypothetical protein CICLE_v1     | not DE   | not DE   | not DE   | not DE  |
| EVM0019927 | LG5 | hypothetical protein CICLE_v1     | not DE   | not DE   | not DE   | not DE  |
| EVM0013089 | LG5 | hypothetical protein CICLE_v1     | not DE   | not DE   | not DE   | not DE  |
| EVM0005026 | LG5 | hypothetical protein CICLE_v1     | not DE   | not DE   | not DE   | not DE  |

|            |     |                               |         |          |          |         |
|------------|-----|-------------------------------|---------|----------|----------|---------|
| EVM0008482 | LG5 | hypothetical protein CICLE_v1 | not DE  | not DE   | not DE   | not DE  |
| EVM0001816 | LG5 | hypothetical protein CICLE_v1 | not DE  | not DE   | not DE   | not DE  |
| EVM0022717 | LG5 | hypothetical protein CICLE_v1 | not DE  | not DE   | not DE   | not DE  |
| EVM0024560 | LG5 | hypothetical protein CICLE_v1 | not DE  | not DE   | not DE   | not DE  |
| EVM0020219 | LG5 | hypothetical protein CICLE_v1 | not DE  | not DE   | not DE   | not DE  |
| EVM0018361 | LG5 | hypothetical protein CICLE_v1 | not DE  | not DE   | not DE   | not DE  |
| EVM0020241 | LG5 | hypothetical protein CICLE_v1 | not DE  | not DE   | not DE   | not DE  |
| EVM0011322 | LG5 | hypothetical protein CICLE_v1 | not DE  | not DE   | not DE   | not DE  |
| EVM0008345 | LG5 | hypothetical protein CICLE_v1 | not DE  | not DE   | not DE   | not DE  |
| EVM0015858 | LG5 | hypothetical protein CICLE_v1 | not DE  | not DE   | not DE   | not DE  |
| EVM0004198 | LG5 | hypothetical protein CICLE_v1 | not DE  | not DE   | not DE   | not DE  |
| EVM0005264 | LG5 | hypothetical protein CICLE_v1 | not DE  | not DE   | not DE   | not DE  |
| EVM0010239 | LG5 | hypothetical protein CICLE_v1 | not DE  | not DE   | not DE   | not DE  |
| EVM0013108 | LG5 | hypothetical protein CICLE_v1 | not DE  | not DE   | not DE   | not DE  |
| EVM0019736 | LG5 | hypothetical protein CICLE_v1 | not DE  | not DE   | not DE   | not DE  |
| EVM0008279 | LG5 | hypothetical protein CICLE_v1 | not DE  | not DE   | not DE   | not DE  |
| EVM0004423 | LG5 | hypothetical protein CICLE_v1 | not DE  | not DE   | not DE   | not DE  |
| EVM0009330 | LG5 | hypothetical protein CICLE_v1 | not DE  | not DE   | not DE   | not DE  |
| EVM0000490 | LG5 | hypothetical protein CICLE_v1 | not DE  | not DE   | not DE   | not DE  |
| EVM0005906 | LG5 | hypothetical protein CICLE_v1 | not DE  | not DE   | not DE   | not DE  |
| EVM0009166 | LG5 | hypothetical protein CICLE_v1 | not DE  | not DE   | not DE   | not DE  |
| EVM0013729 | LG5 | hypothetical protein CICLE_v1 | not DE  | not DE   | not DE   | not DE  |
| EVM0021746 | LG5 | hypothetical protein CICLE_v1 | not DE  | not DE   | not DE   | not DE  |
| EVM0011530 | LG5 | hypothetical protein CICLE_v1 | not DE  | not DE   | not DE   | not DE  |
| EVM0015552 | LG5 | hypothetical protein CICLE_v1 | not DE  | not DE   | 1.134223 | 0.03964 |
| EVM0005753 | LG5 | hypothetical protein CICLE_v1 | not DE  | not DE   | not DE   | not DE  |
| EVM0006818 | LG5 | hypothetical protein CICLE_v1 | not DE  | not DE   | not DE   | not DE  |
| EVM0005129 | LG5 | hypothetical protein CICLE_v1 | not DE  | not DE   | not DE   | not DE  |
| EVM0022695 | LG5 | hypothetical protein CICLE_v1 | not DE  | not DE   | not DE   | not DE  |
| EVM0021055 | LG5 | hypothetical protein CICLE_v1 | not DE  | not DE   | not DE   | not DE  |
| EVM0000829 | LG5 | hypothetical protein CICLE_v1 | not DE  | not DE   | not DE   | not DE  |
| EVM0020085 | LG5 | hypothetical protein CICLE_v1 | not DE  | not DE   | not DE   | not DE  |
| EVM0002339 | LG5 | hypothetical protein CICLE_v1 | not DE  | not DE   | not DE   | not DE  |
| EVM0021939 | LG5 | hypothetical protein CICLE_v1 | not DE  | not DE   | 1.046037 | 0.0179  |
| EVM0018851 | LG5 | hypothetical protein CICLE_v1 | not DE  | not DE   | not DE   | not DE  |
| EVM0000860 | LG5 | hypothetical protein CICLE_v1 | -1.0158 | 0.014473 | not DE   | not DE  |
| EVM0004032 | LG5 | hypothetical protein CICLE_v1 | not DE  | not DE   | not DE   | not DE  |
| EVM0022030 | LG5 | hypothetical protein CICLE_v1 | not DE  | not DE   | not DE   | not DE  |
| EVM0009030 | LG5 | hypothetical protein CICLE_v1 | not DE  | not DE   | not DE   | not DE  |
| EVM0015575 | LG5 | hypothetical protein CICLE_v1 | not DE  | not DE   | not DE   | not DE  |
| EVM0024483 | LG5 | hypothetical protein CICLE_v1 | not DE  | not DE   | not DE   | not DE  |
| EVM0021043 | LG5 | hypothetical protein CICLE_v1 | not DE  | not DE   | not DE   | not DE  |
| EVM0019180 | LG5 | hypothetical protein CICLE_v1 | not DE  | not DE   | not DE   | not DE  |
| EVM0014183 | LG5 | hypothetical protein CICLE_v1 | not DE  | not DE   | not DE   | not DE  |
| EVM0003307 | LG5 | hypothetical protein CICLE_v1 | not DE  | not DE   | not DE   | not DE  |
| EVM0013918 | LG5 | hypothetical protein CICLE_v1 | not DE  | not DE   | not DE   | not DE  |
| EVM0010913 | LG5 | hypothetical protein CICLE_v1 | not DE  | not DE   | not DE   | not DE  |
| EVM0011692 | LG5 | hypothetical protein CICLE_v1 | not DE  | not DE   | not DE   | not DE  |
| EVM0019919 | LG5 | hypothetical protein CICLE_v1 | not DE  | not DE   | not DE   | not DE  |
| EVM0010364 | LG5 | hypothetical protein CICLE_v1 | not DE  | not DE   | -1.62491 | 0.04864 |
| EVM0005260 | LG5 | hypothetical protein CICLE_v1 | not DE  | not DE   | not DE   | not DE  |
| EVM0008862 | LG5 | hypothetical protein CICLE_v1 | not DE  | not DE   | not DE   | not DE  |
| EVM0015471 | LG5 | hypothetical protein CICLE_v1 | not DE  | not DE   | not DE   | not DE  |
| EVM0016658 | LG5 | hypothetical protein CICLE_v1 | not DE  | not DE   | not DE   | not DE  |

|            |     |                               |          |          |          |         |
|------------|-----|-------------------------------|----------|----------|----------|---------|
| EVM0012963 | LG5 | hypothetical protein CICLE_v1 | not DE   | not DE   | not DE   | not DE  |
| EVM0008173 | LG5 | hypothetical protein CICLE_v1 | not DE   | not DE   | not DE   | not DE  |
| EVM0012289 | LG5 | hypothetical protein CICLE_v1 | not DE   | not DE   | not DE   | not DE  |
| EVM0013734 | LG5 | hypothetical protein CICLE_v1 | not DE   | not DE   | not DE   | not DE  |
| EVM0022719 | LG5 | hypothetical protein CICLE_v1 | not DE   | not DE   | not DE   | not DE  |
| EVM0019356 | LG5 | hypothetical protein CICLE_v1 | 1.184925 | 1.23E-05 | not DE   | not DE  |
| EVM0005715 | LG5 | hypothetical protein CICLE_v1 | not DE   | not DE   | -1.05159 | #####   |
| EVM0001597 | LG5 | hypothetical protein CICLE_v1 | not DE   | not DE   | not DE   | not DE  |
| EVM0006083 | LG5 | hypothetical protein CICLE_v1 | not DE   | not DE   | not DE   | not DE  |
| EVM0008967 | LG5 | hypothetical protein CICLE_v1 | not DE   | not DE   | not DE   | not DE  |
| EVM0000426 | LG5 | hypothetical protein CICLE_v1 | not DE   | not DE   | not DE   | not DE  |
| EVM0005637 | LG5 | hypothetical protein CICLE_v1 | not DE   | not DE   | not DE   | not DE  |
| EVM0017806 | LG5 | hypothetical protein CICLE_v1 | not DE   | not DE   | not DE   | not DE  |
| EVM0014547 | LG5 | hypothetical protein CICLE_v1 | not DE   | not DE   | not DE   | not DE  |
| EVM0012888 | LG5 | hypothetical protein CICLE_v1 | not DE   | not DE   | not DE   | not DE  |
| EVM0009809 | LG5 | hypothetical protein CICLE_v1 | not DE   | not DE   | not DE   | not DE  |
| EVM0003303 | LG5 | hypothetical protein CICLE_v1 | not DE   | not DE   | not DE   | not DE  |
| EVM0001891 | LG5 | hypothetical protein CICLE_v1 | not DE   | not DE   | not DE   | not DE  |
| EVM0020861 | LG5 | hypothetical protein CICLE_v1 | not DE   | not DE   | not DE   | not DE  |
| EVM0000236 | LG5 | hypothetical protein CICLE_v1 | not DE   | not DE   | not DE   | not DE  |
| EVM0010830 | LG5 | hypothetical protein CICLE_v1 | not DE   | not DE   | not DE   | not DE  |
| EVM0011547 | LG5 | hypothetical protein CICLE_v1 | not DE   | not DE   | not DE   | not DE  |
| EVM0017532 | LG5 | hypothetical protein CICLE_v1 | not DE   | not DE   | not DE   | not DE  |
| EVM0004921 | LG5 | hypothetical protein CICLE_v1 | not DE   | not DE   | not DE   | not DE  |
| EVM0008640 | LG5 | hypothetical protein CICLE_v1 | not DE   | not DE   | not DE   | not DE  |
| EVM0020147 | LG5 | hypothetical protein CICLE_v1 | not DE   | not DE   | not DE   | not DE  |
| EVM0011097 | LG5 | hypothetical protein CICLE_v1 | not DE   | not DE   | not DE   | not DE  |
| EVM0011805 | LG5 | hypothetical protein CICLE_v1 | not DE   | not DE   | not DE   | not DE  |
| EVM0007256 | LG5 | hypothetical protein CICLE_v1 | not DE   | not DE   | not DE   | not DE  |
| EVM0024536 | LG5 | hypothetical protein CICLE_v1 | 1.551609 | 0.01649  | not DE   | not DE  |
| EVM0003919 | LG5 | hypothetical protein CICLE_v1 | not DE   | not DE   | not DE   | not DE  |
| EVM0009916 | LG5 | hypothetical protein CICLE_v1 | 1.427123 | 0.011175 | not DE   | not DE  |
| EVM0001251 | LG5 | hypothetical protein CICLE_v1 | not DE   | not DE   | not DE   | not DE  |
| EVM0017482 | LG5 | hypothetical protein CICLE_v1 | 1.549058 | 0.01328  | not DE   | not DE  |
| EVM0000330 | LG5 | hypothetical protein CICLE_v1 | not DE   | not DE   | not DE   | not DE  |
| EVM0019826 | LG5 | hypothetical protein CICLE_v1 | not DE   | not DE   | not DE   | not DE  |
| EVM0023853 | LG5 | hypothetical protein CICLE_v1 | not DE   | not DE   | -1.01138 | 0.00011 |
| EVM0023912 | LG5 | hypothetical protein CICLE_v1 | not DE   | not DE   | not DE   | not DE  |
| EVM0008860 | LG5 | hypothetical protein CICLE_v1 | 2.76467  | 7.62E-10 | 1.1003   | 0.03099 |
| EVM0002636 | LG5 | hypothetical protein CICLE_v1 | not DE   | not DE   | not DE   | not DE  |
| EVM0006266 | LG5 | hypothetical protein CICLE_v1 | not DE   | not DE   | not DE   | not DE  |
| EVM0020825 | LG5 | hypothetical protein CICLE_v1 | not DE   | not DE   | not DE   | not DE  |
| EVM0006217 | LG5 | hypothetical protein CICLE_v1 | not DE   | not DE   | not DE   | not DE  |
| EVM0021451 | LG5 | hypothetical protein CICLE_v1 | not DE   | not DE   | not DE   | not DE  |
| EVM0010975 | LG5 | hypothetical protein CICLE_v1 | not DE   | not DE   | not DE   | not DE  |
| EVM0016278 | LG5 | hypothetical protein CICLE_v1 | not DE   | not DE   | not DE   | not DE  |
| EVM0018980 | LG5 | hypothetical protein CICLE_v1 | not DE   | not DE   | not DE   | not DE  |
| EVM0018590 | LG5 | hypothetical protein CICLE_v1 | not DE   | not DE   | not DE   | not DE  |
| EVM0017747 | LG5 | hypothetical protein CICLE_v1 | not DE   | not DE   | not DE   | not DE  |
| EVM0010451 | LG5 | hypothetical protein CICLE_v1 | not DE   | not DE   | not DE   | not DE  |
| EVM0015889 | LG5 | hypothetical protein CICLE_v1 | not DE   | not DE   | not DE   | not DE  |
| EVM0018188 | LG5 | hypothetical protein CICLE_v1 | not DE   | not DE   | not DE   | not DE  |
| EVM0021774 | LG5 | hypothetical protein CICLE_v1 | not DE   | not DE   | not DE   | not DE  |
| EVM0000510 | LG5 | hypothetical protein CICLE_v1 | not DE   | not DE   | not DE   | not DE  |

|            |     |                               |          |          |          |         |
|------------|-----|-------------------------------|----------|----------|----------|---------|
| EVM0004135 | LG5 | hypothetical protein CICLE_v1 | not DE   | not DE   | not DE   | not DE  |
| EVM0017694 | LG5 | hypothetical protein CICLE_v1 | not DE   | not DE   | not DE   | not DE  |
| EVM0016864 | LG5 | hypothetical protein CICLE_v1 | not DE   | not DE   | not DE   | not DE  |
| EVM0001485 | LG5 | hypothetical protein CICLE_v1 | -1.03276 | 0.045646 | not DE   | not DE  |
| EVM0023604 | LG5 | hypothetical protein CICLE_v1 | not DE   | not DE   | not DE   | not DE  |
| EVM0002145 | LG5 | hypothetical protein CICLE_v1 | not DE   | not DE   | not DE   | not DE  |
| EVM0001720 | LG5 | hypothetical protein CICLE_v1 | not DE   | not DE   | not DE   | not DE  |
| EVM0016275 | LG5 | hypothetical protein CICLE_v1 | 1.215962 | 6.36E-07 | not DE   | not DE  |
| EVM0022264 | LG5 | hypothetical protein CICLE_v1 | not DE   | not DE   | 2.950983 | 0.04199 |
| EVM0000966 | LG5 | hypothetical protein CICLE_v1 | -3.1616  | 0.014152 | -2.85401 | #####   |
| EVM0021100 | LG5 | hypothetical protein CICLE_v1 | not DE   | not DE   | not DE   | not DE  |
| EVM0001765 | LG5 | hypothetical protein CICLE_v1 | not DE   | not DE   | not DE   | not DE  |
| EVM0002097 | LG5 | hypothetical protein CICLE_v1 | not DE   | not DE   | not DE   | not DE  |
| EVM0022318 | LG5 | hypothetical protein CICLE_v1 | not DE   | not DE   | not DE   | not DE  |
| EVM0023507 | LG5 | hypothetical protein CICLE_v1 | not DE   | not DE   | not DE   | not DE  |
| EVM0015813 | LG5 | hypothetical protein CICLE_v1 | not DE   | not DE   | not DE   | not DE  |
| EVM0011195 | LG5 | hypothetical protein CICLE_v1 | not DE   | not DE   | not DE   | not DE  |
| EVM0005674 | LG5 | hypothetical protein CICLE_v1 | not DE   | not DE   | not DE   | not DE  |
| EVM0013881 | LG5 | hypothetical protein CICLE_v1 | not DE   | not DE   | not DE   | not DE  |
| EVM0011467 | LG5 | hypothetical protein CICLE_v1 | 1.299855 | 0.010239 | not DE   | not DE  |
| EVM0011620 | LG5 | hypothetical protein CICLE_v1 | -1.37906 | 0.027071 | not DE   | not DE  |
| EVM0001598 | LG5 | hypothetical protein CICLE_v1 | not DE   | not DE   | not DE   | not DE  |
| EVM0000050 | LG5 | hypothetical protein CICLE_v1 | not DE   | not DE   | not DE   | not DE  |
| EVM0022677 | LG5 | hypothetical protein CICLE_v1 | not DE   | not DE   | not DE   | not DE  |
| EVM0000085 | LG5 | hypothetical protein CICLE_v1 | not DE   | not DE   | not DE   | not DE  |
| EVM0002324 | LG5 | hypothetical protein CICLE_v1 | not DE   | not DE   | not DE   | not DE  |
| EVM0016406 | LG5 | hypothetical protein CICLE_v1 | not DE   | not DE   | not DE   | not DE  |
| EVM0009963 | LG5 | hypothetical protein CICLE_v1 | not DE   | not DE   | not DE   | not DE  |
| EVM0007017 | LG5 | hypothetical protein CICLE_v1 | not DE   | not DE   | not DE   | not DE  |
| EVM0013904 | LG5 | hypothetical protein CICLE_v1 | not DE   | not DE   | not DE   | not DE  |
| EVM0004308 | LG5 | hypothetical protein CICLE_v1 | not DE   | not DE   | not DE   | not DE  |
| EVM0003983 | LG5 | hypothetical protein CICLE_v1 | not DE   | not DE   | not DE   | not DE  |
| EVM0001440 | LG5 | hypothetical protein CICLE_v1 | not DE   | not DE   | not DE   | not DE  |
| EVM0021978 | LG5 | hypothetical protein CICLE_v1 | not DE   | not DE   | not DE   | not DE  |
| EVM0017199 | LG5 | hypothetical protein CICLE_v1 | not DE   | not DE   | not DE   | not DE  |
| EVM0020627 | LG5 | hypothetical protein CICLE_v1 | not DE   | not DE   | not DE   | not DE  |
| EVM0005117 | LG5 | hypothetical protein CICLE_v1 | not DE   | not DE   | not DE   | not DE  |
| EVM0020582 | LG5 | hypothetical protein CICLE_v1 | not DE   | not DE   | not DE   | not DE  |
| EVM0002348 | LG5 | hypothetical protein CICLE_v1 | not DE   | not DE   | not DE   | not DE  |
| EVM0019763 | LG5 | hypothetical protein CICLE_v1 | -1.07208 | 0.000984 | not DE   | not DE  |
| EVM0009331 | LG5 | hypothetical protein CICLE_v1 | -1.26823 | 0.003254 | not DE   | not DE  |
| EVM0005476 | LG5 | hypothetical protein CICLE_v1 | not DE   | not DE   | not DE   | not DE  |
| EVM0017505 | LG5 | hypothetical protein CICLE_v1 | not DE   | not DE   | not DE   | not DE  |
| EVM0011823 | LG5 | hypothetical protein CICLE_v1 | not DE   | not DE   | not DE   | not DE  |
| EVM0018335 | LG5 | hypothetical protein CICLE_v1 | not DE   | not DE   | not DE   | not DE  |
| EVM0005397 | LG5 | hypothetical protein CICLE_v1 | not DE   | not DE   | not DE   | not DE  |
| EVM0007786 | LG5 | hypothetical protein CICLE_v1 | not DE   | not DE   | not DE   | not DE  |
| EVM0002790 | LG5 | hypothetical protein CICLE_v1 | not DE   | not DE   | not DE   | not DE  |
| EVM0023508 | LG5 | hypothetical protein CICLE_v1 | not DE   | not DE   | not DE   | not DE  |
| EVM0013634 | LG5 | hypothetical protein CICLE_v1 | not DE   | not DE   | not DE   | not DE  |
| EVM0009774 | LG5 | hypothetical protein CICLE_v1 | not DE   | not DE   | not DE   | not DE  |
| EVM0005683 | LG5 | hypothetical protein CICLE_v1 | not DE   | not DE   | not DE   | not DE  |
| EVM0015886 | LG5 | hypothetical protein CICLE_v1 | not DE   | not DE   | not DE   | not DE  |
| EVM0010628 | LG5 | hypothetical protein CICLE_v1 | not DE   | not DE   | not DE   | not DE  |

|            |     |                               |          |          |        |        |
|------------|-----|-------------------------------|----------|----------|--------|--------|
| EVM0015215 | LG5 | hypothetical protein CICLE_v1 | not DE   | not DE   | not DE | not DE |
| EVM0013517 | LG5 | hypothetical protein CICLE_v1 | not DE   | not DE   | not DE | not DE |
| EVM0022751 | LG5 | hypothetical protein CICLE_v1 | not DE   | not DE   | not DE | not DE |
| EVM0022668 | LG5 | hypothetical protein CICLE_v1 | not DE   | not DE   | not DE | not DE |
| EVM0007945 | LG5 | hypothetical protein CICLE_v1 | not DE   | not DE   | not DE | not DE |
| EVM0016715 | LG5 | hypothetical protein CICLE_v1 | not DE   | not DE   | not DE | not DE |
| EVM0008297 | LG5 | hypothetical protein CICLE_v1 | not DE   | not DE   | not DE | not DE |
| EVM0001258 | LG5 | hypothetical protein CICLE_v1 | 3.232047 | 0.000365 | not DE | not DE |
| EVM0002216 | LG5 | hypothetical protein CICLE_v1 | not DE   | not DE   | not DE | not DE |
| EVM0015691 | LG5 | hypothetical protein CICLE_v1 | not DE   | not DE   | not DE | not DE |
| EVM0013386 | LG5 | hypothetical protein CICLE_v1 | not DE   | not DE   | not DE | not DE |
| EVM0008048 | LG5 | hypothetical protein CICLE_v1 | not DE   | not DE   | not DE | not DE |
| EVM0022442 | LG5 | hypothetical protein CICLE_v1 | not DE   | not DE   | not DE | not DE |
| EVM0001725 | LG5 | hypothetical protein CICLE_v1 | not DE   | not DE   | not DE | not DE |
| EVM0022727 | LG5 | hypothetical protein CICLE_v1 | not DE   | not DE   | not DE | not DE |
| EVM0020835 | LG5 | hypothetical protein CICLE_v1 | not DE   | not DE   | not DE | not DE |
| EVM0007836 | LG5 | hypothetical protein CICLE_v1 | not DE   | not DE   | not DE | not DE |
| EVM0022707 | LG5 | hypothetical protein CICLE_v1 | -3.17751 | 0.001415 | not DE | not DE |
| EVM0022991 | LG5 | hypothetical protein CICLE_v1 | not DE   | not DE   | not DE | not DE |
| EVM0023720 | LG5 | hypothetical protein CICLE_v1 | not DE   | not DE   | not DE | not DE |
| EVM0003986 | LG5 | hypothetical protein CICLE_v1 | not DE   | not DE   | not DE | not DE |
| EVM0002867 | LG5 | hypothetical protein CICLE_v1 | not DE   | not DE   | not DE | not DE |
| EVM0003807 | LG5 | hypothetical protein CICLE_v1 | not DE   | not DE   | not DE | not DE |
| EVM0011930 | LG5 | hypothetical protein CICLE_v1 | not DE   | not DE   | not DE | not DE |
| EVM0020340 | LG5 | hypothetical protein CICLE_v1 | -1.05738 | 0.00824  | not DE | not DE |
| EVM0016580 | LG5 | hypothetical protein CICLE_v1 | not DE   | not DE   | not DE | not DE |
| EVM0021015 | LG5 | hypothetical protein CICLE_v1 | not DE   | not DE   | not DE | not DE |
| EVM0021187 | LG5 | hypothetical protein CICLE_v1 | not DE   | not DE   | not DE | not DE |
| EVM0007246 | LG5 | hypothetical protein CICLE_v1 | not DE   | not DE   | not DE | not DE |
| EVM0009171 | LG5 | hypothetical protein CICLE_v1 | not DE   | not DE   | not DE | not DE |
| EVM0001569 | LG5 | hypothetical protein CICLE_v1 | not DE   | not DE   | not DE | not DE |
| EVM0020001 | LG5 | hypothetical protein CICLE_v1 | not DE   | not DE   | not DE | not DE |
| EVM0009978 | LG5 | hypothetical protein CICLE_v1 | not DE   | not DE   | not DE | not DE |
| EVM0002972 | LG5 | hypothetical protein CICLE_v1 | not DE   | not DE   | not DE | not DE |
| EVM0011969 | LG5 | hypothetical protein CICLE_v1 | not DE   | not DE   | not DE | not DE |
| EVM0004193 | LG5 | hypothetical protein CICLE_v1 | not DE   | not DE   | not DE | not DE |
| EVM0015036 | LG5 | hypothetical protein CICLE_v1 | not DE   | not DE   | not DE | not DE |
| EVM0009086 | LG5 | hypothetical protein CICLE_v1 | not DE   | not DE   | not DE | not DE |
| EVM0021924 | LG5 | hypothetical protein CICLE_v1 | not DE   | not DE   | not DE | not DE |
| EVM0014462 | LG5 | hypothetical protein CICLE_v1 | not DE   | not DE   | not DE | not DE |
| EVM0015065 | LG5 | hypothetical protein CICLE_v1 | not DE   | not DE   | not DE | not DE |
| EVM0008327 | LG5 | hypothetical protein CICLE_v1 | -1.59003 | 0.023019 | not DE | not DE |
| EVM0016526 | LG5 | hypothetical protein CICLE_v1 | not DE   | not DE   | not DE | not DE |
| EVM0012746 | LG5 | hypothetical protein CICLE_v1 | not DE   | not DE   | not DE | not DE |
| EVM0019857 | LG5 | hypothetical protein CICLE_v1 | not DE   | not DE   | not DE | not DE |
| EVM0015495 | LG5 | hypothetical protein CICLE_v1 | not DE   | not DE   | not DE | not DE |
| EVM0024399 | LG5 | hypothetical protein CICLE_v1 | not DE   | not DE   | not DE | not DE |
| EVM0011894 | LG5 | hypothetical protein CICLE_v1 | not DE   | not DE   | not DE | not DE |
| EVM0022983 | LG5 | hypothetical protein CICLE_v1 | not DE   | not DE   | not DE | not DE |
| EVM0003637 | LG5 | hypothetical protein CICLE_v1 | not DE   | not DE   | not DE | not DE |
| EVM0024421 | LG5 | hypothetical protein CICLE_v1 | not DE   | not DE   | not DE | not DE |
| EVM0011540 | LG5 | hypothetical protein CICLE_v1 | not DE   | not DE   | not DE | not DE |
| EVM0004005 | LG5 | hypothetical protein CICLE_v1 | not DE   | not DE   | not DE | not DE |
| EVM0016425 | LG5 | hypothetical protein CICLE_v1 | not DE   | not DE   | not DE | not DE |



|            |     |                               |          |          |          |         |
|------------|-----|-------------------------------|----------|----------|----------|---------|
| EVM0003349 | LG5 | hypothetical protein CICLE_v1 | not DE   | not DE   | not DE   | not DE  |
| EVM0009012 | LG5 | hypothetical protein CICLE_v1 | not DE   | not DE   | not DE   | not DE  |
| EVM0012109 | LG5 | hypothetical protein CICLE_v1 | not DE   | not DE   | not DE   | not DE  |
| EVM0013478 | LG5 | hypothetical protein CICLE_v1 | not DE   | not DE   | not DE   | not DE  |
| EVM0005588 | LG5 | hypothetical protein CICLE_v1 | not DE   | not DE   | not DE   | not DE  |
| EVM0022867 | LG5 | hypothetical protein CICLE_v1 | not DE   | not DE   | not DE   | not DE  |
| EVM0008082 | LG5 | hypothetical protein CICLE_v1 | -1.88868 | 0.000348 | not DE   | not DE  |
| EVM0013276 | LG5 | hypothetical protein CICLE_v1 | not DE   | not DE   | not DE   | not DE  |
| EVM0010688 | LG5 | hypothetical protein CICLE_v1 | not DE   | not DE   | not DE   | not DE  |
| EVM0024447 | LG5 | hypothetical protein CICLE_v1 | 4.561329 | 0.000409 | 2.037471 | 0.02445 |
| EVM0012779 | LG5 | hypothetical protein CICLE_v1 | not DE   | not DE   | not DE   | not DE  |
| EVM0005296 | LG5 | hypothetical protein CICLE_v1 | not DE   | not DE   | not DE   | not DE  |
| EVM0010030 | LG5 | hypothetical protein CICLE_v1 | not DE   | not DE   | not DE   | not DE  |
| EVM0017056 | LG5 | hypothetical protein CICLE_v1 | not DE   | not DE   | not DE   | not DE  |
| EVM0023430 | LG5 | hypothetical protein CICLE_v1 | not DE   | not DE   | not DE   | not DE  |
| EVM0013390 | LG5 | hypothetical protein CICLE_v1 | not DE   | not DE   | not DE   | not DE  |
| EVM0009147 | LG5 | hypothetical protein CICLE_v1 | not DE   | not DE   | not DE   | not DE  |
| EVM0016016 | LG5 | hypothetical protein CICLE_v1 | not DE   | not DE   | not DE   | not DE  |
| EVM0017262 | LG5 | hypothetical protein CICLE_v1 | not DE   | not DE   | not DE   | not DE  |
| EVM0003420 | LG5 | hypothetical protein CICLE_v1 | not DE   | not DE   | not DE   | not DE  |
| EVM0019252 | LG5 | hypothetical protein CICLE_v1 | not DE   | not DE   | not DE   | not DE  |
| EVM0022414 | LG5 | hypothetical protein CICLE_v1 | not DE   | not DE   | not DE   | not DE  |
| EVM0020233 | LG5 | hypothetical protein CICLE_v1 | -7.14114 | 0.022748 | not DE   | not DE  |
| EVM0023531 | LG5 | hypothetical protein CICLE_v1 | not DE   | not DE   | not DE   | not DE  |
| EVM0010656 | LG5 | hypothetical protein CICLE_v1 | not DE   | not DE   | not DE   | not DE  |
| EVM0010869 | LG5 | hypothetical protein CICLE_v1 | not DE   | not DE   | not DE   | not DE  |
| EVM0016074 | LG5 | hypothetical protein CICLE_v1 | not DE   | not DE   | not DE   | not DE  |
| EVM0018834 | LG5 | hypothetical protein CICLE_v1 | not DE   | not DE   | not DE   | not DE  |
| EVM0006116 | LG5 | hypothetical protein CICLE_v1 | not DE   | not DE   | not DE   | not DE  |
| EVM0019900 | LG5 | hypothetical protein CICLE_v1 | not DE   | not DE   | not DE   | not DE  |
| EVM0010683 | LG5 | hypothetical protein CICLE_v1 | -1.46053 | 0.001492 | not DE   | not DE  |
| EVM0020442 | LG5 | hypothetical protein CICLE_v1 | not DE   | not DE   | not DE   | not DE  |
| EVM0007981 | LG5 | hypothetical protein CICLE_v1 | not DE   | not DE   | not DE   | not DE  |
| EVM0019175 | LG5 | hypothetical protein CICLE_v1 | not DE   | not DE   | not DE   | not DE  |
| EVM0015728 | LG5 | hypothetical protein CICLE_v1 | not DE   | not DE   | not DE   | not DE  |
| EVM0016587 | LG5 | hypothetical protein CISIN_1g | not DE   | not DE   | not DE   | not DE  |
| EVM0023188 | LG5 | hypothetical protein CISIN_1g | not DE   | not DE   | not DE   | not DE  |
| EVM0018623 | LG5 | hypothetical protein CISIN_1g | not DE   | not DE   | not DE   | not DE  |
| EVM0022948 | LG5 | hypothetical protein CISIN_1g | not DE   | not DE   | not DE   | not DE  |
| EVM0012965 | LG5 | hypothetical protein CISIN_1g | not DE   | not DE   | not DE   | not DE  |
| EVM0005386 | LG5 | hypothetical protein CISIN_1g | not DE   | not DE   | not DE   | not DE  |
| EVM0020845 | LG5 | hypothetical protein CISIN_1g | not DE   | not DE   | not DE   | not DE  |
| EVM0015086 | LG5 | hypothetical protein CISIN_1g | not DE   | not DE   | not DE   | not DE  |
| EVM0019494 | LG5 | hypothetical protein CISIN_1g | not DE   | not DE   | not DE   | not DE  |
| EVM0000576 | LG5 | hypothetical protein CISIN_1g | not DE   | not DE   | not DE   | not DE  |
| EVM0012288 | LG5 | hypothetical protein CISIN_1g | not DE   | not DE   | not DE   | not DE  |
| EVM0022246 | LG5 | hypothetical protein CISIN_1g | not DE   | not DE   | not DE   | not DE  |
| EVM0001943 | LG5 | hypothetical protein CISIN_1g | not DE   | not DE   | not DE   | not DE  |
| EVM0001898 | LG5 | hypothetical protein CISIN_1g | not DE   | not DE   | not DE   | not DE  |
| EVM0003633 | LG5 | hypothetical protein CISIN_1g | not DE   | not DE   | not DE   | not DE  |
| EVM0023757 | LG5 | hypothetical protein CISIN_1g | not DE   | not DE   | not DE   | not DE  |
| EVM0008700 | LG5 | hypothetical protein CISIN_1g | not DE   | not DE   | not DE   | not DE  |
| EVM0016380 | LG5 | hypothetical protein CISIN_1g | not DE   | not DE   | not DE   | not DE  |
| EVM0010640 | LG5 | hypothetical protein CISIN_1g | not DE   | not DE   | not DE   | not DE  |





|            |     |                               |          |          |          |         |
|------------|-----|-------------------------------|----------|----------|----------|---------|
| EVM0020558 | LG5 | hypothetical protein CISIN_1g | not DE   | not DE   | -2.84431 | 0.00113 |
| EVM0021604 | LG5 | hypothetical protein CISIN_1g | not DE   | not DE   | not DE   | not DE  |
| EVM0001910 | LG5 | hypothetical protein CISIN_1g | not DE   | not DE   | not DE   | not DE  |
| EVM0019290 | LG5 | hypothetical protein CISIN_1g | not DE   | not DE   | not DE   | not DE  |
| EVM0024160 | LG5 | hypothetical protein CISIN_1g | not DE   | not DE   | 2.43052  | 0.00088 |
| EVM0021441 | LG5 | hypothetical protein CISIN_1g | 1.125929 | 0.000346 | not DE   | not DE  |
| EVM0004570 | LG5 | hypothetical protein CISIN_1g | not DE   | not DE   | not DE   | not DE  |
| EVM0006625 | LG5 | hypothetical protein CISIN_1g | not DE   | not DE   | not DE   | not DE  |
| EVM0000786 | LG5 | hypothetical protein CISIN_1g | not DE   | not DE   | not DE   | not DE  |
| EVM0017324 | LG5 | hypothetical protein CISIN_1g | not DE   | not DE   | 1.502978 | #####   |
| EVM0018199 | LG5 | hypothetical protein CISIN_1g | not DE   | not DE   | not DE   | not DE  |
| EVM0016320 | LG5 | hypothetical protein CISIN_1g | not DE   | not DE   | not DE   | not DE  |
| EVM0008292 | LG5 | hypothetical protein CISIN_1g | not DE   | not DE   | -1.01617 | #####   |
| EVM0001407 | LG5 | hypothetical protein CISIN_1g | not DE   | not DE   | not DE   | not DE  |
| EVM0023970 | LG5 | hypothetical protein CISIN_1g | not DE   | not DE   | -1.04517 | 0.0136  |
| EVM0017364 | LG5 | hypothetical protein CISIN_1g | not DE   | not DE   | not DE   | not DE  |
| EVM0003090 | LG5 | hypothetical protein CISIN_1g | not DE   | not DE   | not DE   | not DE  |
| EVM0001815 | LG5 | hypothetical protein CISIN_1g | not DE   | not DE   | not DE   | not DE  |
| EVM0007614 | LG5 | hypothetical protein CISIN_1g | not DE   | not DE   | not DE   | not DE  |
| EVM0007240 | LG5 | hypothetical protein CISIN_1g | not DE   | not DE   | not DE   | not DE  |
| EVM0020079 | LG5 | hypothetical protein CISIN_1g | not DE   | not DE   | not DE   | not DE  |
| EVM0022269 | LG5 | hypothetical protein CISIN_1g | not DE   | not DE   | not DE   | not DE  |
| EVM0023362 | LG5 | hypothetical protein CISIN_1g | not DE   | not DE   | not DE   | not DE  |
| EVM0006770 | LG5 | hypothetical protein CISIN_1g | not DE   | not DE   | not DE   | not DE  |
| EVM0006378 | LG5 | hypothetical protein CISIN_1g | not DE   | not DE   | not DE   | not DE  |
| EVM0016421 | LG5 | hypothetical protein CISIN_1g | not DE   | not DE   | not DE   | not DE  |
| EVM0017326 | LG5 | hypothetical protein CISIN_1g | not DE   | not DE   | not DE   | not DE  |
| EVM0017607 | LG5 | hypothetical protein CISIN_1g | not DE   | not DE   | not DE   | not DE  |
| EVM0014596 | LG5 | hypothetical protein CISIN_1g | 4.743663 | 0.002867 | not DE   | not DE  |
| EVM0021851 | LG5 | hypothetical protein CISIN_1g | not DE   | not DE   | not DE   | not DE  |
| EVM0010460 | LG5 | hypothetical protein CISIN_1g | not DE   | not DE   | not DE   | not DE  |
| EVM0003886 | LG5 | hypothetical protein CISIN_1g | not DE   | not DE   | not DE   | not DE  |
| EVM0010777 | LG5 | hypothetical protein CISIN_1g | not DE   | not DE   | not DE   | not DE  |
| EVM0017123 | LG5 | hypothetical protein CISIN_1g | not DE   | not DE   | not DE   | not DE  |
| EVM0021141 | LG5 | hypothetical protein CISIN_1g | not DE   | not DE   | not DE   | not DE  |
| EVM0021283 | LG5 | hypothetical protein CISIN_1g | not DE   | not DE   | not DE   | not DE  |
| EVM0017382 | LG5 | hypothetical protein CISIN_1g | not DE   | not DE   | not DE   | not DE  |
| EVM0003562 | LG5 | hypothetical protein CISIN_1g | not DE   | not DE   | not DE   | not DE  |
| EVM0010820 | LG5 | hypothetical protein CISIN_1g | not DE   | not DE   | not DE   | not DE  |
| EVM0020287 | LG5 | hypothetical protein CISIN_1g | not DE   | not DE   | not DE   | not DE  |
| EVM0012485 | LG5 | hypothetical protein CISIN_1g | not DE   | not DE   | not DE   | not DE  |
| EVM0004740 | LG5 | hypothetical protein CISIN_1g | not DE   | not DE   | not DE   | not DE  |
| EVM0016769 | LG5 | hypothetical protein CISIN_1g | 3.678266 | 6.26E-05 | not DE   | not DE  |
| EVM0022973 | LG5 | hypothetical protein CISIN_1g | not DE   | not DE   | not DE   | not DE  |
| EVM0006005 | LG5 | hypothetical protein CISIN_1g | not DE   | not DE   | not DE   | not DE  |
| EVM0011469 | LG5 | hypothetical protein CISIN_1g | not DE   | not DE   | not DE   | not DE  |
| EVM0013833 | LG5 | hypothetical protein CISIN_1g | not DE   | not DE   | not DE   | not DE  |
| EVM0023221 | LG5 | hypothetical protein CISIN_1g | not DE   | not DE   | not DE   | not DE  |
| EVM0007536 | LG5 | hypothetical protein CISIN_1g | not DE   | not DE   | not DE   | not DE  |
| EVM0011292 | LG5 | hypothetical protein CISIN_1g | not DE   | not DE   | not DE   | not DE  |
| EVM0015931 | LG5 | hypothetical protein CISIN_1g | not DE   | not DE   | not DE   | not DE  |
| EVM0002198 | LG5 | hypothetical protein CISIN_1g | not DE   | not DE   | not DE   | not DE  |
| EVM0015947 | LG5 | hypothetical protein CISIN_1g | -2.04755 | 1.48E-11 | -1.05067 | 0.0047  |
| EVM0007376 | LG5 | hypothetical protein CISIN_1g | not DE   | not DE   | not DE   | not DE  |

|            |     |                               |          |          |          |         |
|------------|-----|-------------------------------|----------|----------|----------|---------|
| EVM0010841 | LG5 | hypothetical protein EUGRSUZ_ | not DE   | not DE   | not DE   | not DE  |
| EVM0004360 | LG5 | hypothetical protein EUGRSUZ_ | not DE   | not DE   | not DE   | not DE  |
| EVM0020232 | LG5 | hypothetical protein F383_237 | not DE   | not DE   | not DE   | not DE  |
| EVM0022441 | LG5 | hypothetical protein JCGZ_007 | not DE   | not DE   | not DE   | not DE  |
| EVM0010238 | LG5 | hypothetical protein JCGZ_013 | not DE   | not DE   | not DE   | not DE  |
| EVM0022633 | LG5 | hypothetical protein JCGZ_013 | not DE   | not DE   | not DE   | not DE  |
| EVM0008260 | LG5 | hypothetical protein JCGZ_018 | not DE   | not DE   | not DE   | not DE  |
| EVM0017967 | LG5 | hypothetical protein JCGZ_018 | not DE   | not DE   | not DE   | not DE  |
| EVM0014059 | LG5 | hypothetical protein JCGZ_043 | not DE   | not DE   | not DE   | not DE  |
| EVM0011141 | LG5 | hypothetical protein JCGZ_045 | not DE   | not DE   | not DE   | not DE  |
| EVM0021351 | LG5 | hypothetical protein JCGZ_045 | not DE   | not DE   | not DE   | not DE  |
| EVM0013485 | LG5 | hypothetical protein JCGZ_045 | not DE   | not DE   | not DE   | not DE  |
| EVM0018116 | LG5 | hypothetical protein JCGZ_046 | not DE   | not DE   | not DE   | not DE  |
| EVM0023736 | LG5 | hypothetical protein JCGZ_046 | -2.03633 | 7.07E-07 | not DE   | not DE  |
| EVM0004329 | LG5 | hypothetical protein JCGZ_046 | 1.152483 | 0.009296 | not DE   | not DE  |
| EVM0019042 | LG5 | hypothetical protein JCGZ_046 | not DE   | not DE   | not DE   | not DE  |
| EVM0005924 | LG5 | hypothetical protein JCGZ_046 | not DE   | not DE   | not DE   | not DE  |
| EVM0014582 | LG5 | hypothetical protein JCGZ_074 | -2.12343 | 8.52E-05 | not DE   | not DE  |
| EVM0000052 | LG5 | hypothetical protein JCGZ_091 | not DE   | not DE   | not DE   | not DE  |
| EVM0023410 | LG5 | hypothetical protein JCGZ_092 | not DE   | not DE   | 1.95523  | 0.00754 |
| EVM0009719 | LG5 | hypothetical protein JCGZ_092 | not DE   | not DE   | not DE   | not DE  |
| EVM0001966 | LG5 | hypothetical protein JCGZ_092 | not DE   | not DE   | not DE   | not DE  |
| EVM0001272 | LG5 | hypothetical protein JCGZ_131 | not DE   | not DE   | not DE   | not DE  |
| EVM0007568 | LG5 | hypothetical protein JCGZ_131 | not DE   | not DE   | not DE   | not DE  |
| EVM0008739 | LG5 | hypothetical protein JCGZ_134 | not DE   | not DE   | not DE   | not DE  |
| EVM0018619 | LG5 | hypothetical protein JCGZ_134 | not DE   | not DE   | not DE   | not DE  |
| EVM0018167 | LG5 | hypothetical protein JCGZ_152 | not DE   | not DE   | not DE   | not DE  |
| EVM0010246 | LG5 | hypothetical protein JCGZ_153 | not DE   | not DE   | not DE   | not DE  |
| EVM0018543 | LG5 | hypothetical protein JCGZ_153 | not DE   | not DE   | not DE   | not DE  |
| EVM0006355 | LG5 | hypothetical protein JCGZ_169 | not DE   | not DE   | not DE   | not DE  |
| EVM0005312 | LG5 | hypothetical protein JCGZ_211 | not DE   | not DE   | not DE   | not DE  |
| EVM0019864 | LG5 | hypothetical protein JCGZ_212 | not DE   | not DE   | not DE   | not DE  |
| EVM0002830 | LG5 | hypothetical protein JCGZ_212 | not DE   | not DE   | not DE   | not DE  |
| EVM0003621 | LG5 | hypothetical protein JCGZ_212 | not DE   | not DE   | not DE   | not DE  |
| EVM0023464 | LG5 | hypothetical protein JCGZ_213 | not DE   | not DE   | not DE   | not DE  |
| EVM0005500 | LG5 | hypothetical protein JCGZ_213 | -2.55424 | 0.011868 | not DE   | not DE  |
| EVM0024260 | LG5 | hypothetical protein JCGZ_213 | not DE   | not DE   | not DE   | not DE  |
| EVM0012578 | LG5 | hypothetical protein JCGZ_213 | not DE   | not DE   | not DE   | not DE  |
| EVM0021220 | LG5 | hypothetical protein JCGZ_215 | not DE   | not DE   | not DE   | not DE  |
| EVM0009542 | LG5 | hypothetical protein JCGZ_215 | not DE   | not DE   | not DE   | not DE  |
| EVM0001708 | LG5 | hypothetical protein JCGZ_215 | not DE   | not DE   | not DE   | not DE  |
| EVM0015982 | LG5 | hypothetical protein JCGZ_215 | not DE   | not DE   | not DE   | not DE  |
| EVM0020457 | LG5 | hypothetical protein JCGZ_215 | not DE   | not DE   | not DE   | not DE  |
| EVM0023478 | LG5 | hypothetical protein JCGZ_215 | not DE   | not DE   | not DE   | not DE  |
| EVM0023945 | LG5 | hypothetical protein JCGZ_215 | not DE   | not DE   | not DE   | not DE  |
| EVM0011374 | LG5 | hypothetical protein JCGZ_215 | not DE   | not DE   | not DE   | not DE  |
| EVM0010119 | LG5 | hypothetical protein JCGZ_215 | not DE   | not DE   | not DE   | not DE  |
| EVM0009002 | LG5 | hypothetical protein JCGZ_215 | not DE   | not DE   | not DE   | not DE  |
| EVM0008184 | LG5 | hypothetical protein JCGZ_215 | not DE   | not DE   | not DE   | not DE  |
| EVM0018300 | LG5 | hypothetical protein JCGZ_216 | not DE   | not DE   | not DE   | not DE  |
| EVM0016656 | LG5 | hypothetical protein JCGZ_230 | not DE   | not DE   | 1.571442 | 0.04779 |
| EVM0016159 | LG5 | hypothetical protein JCGZ_251 | not DE   | not DE   | not DE   | not DE  |
| EVM0011370 | LG5 | hypothetical protein JCGZ_271 | not DE   | not DE   | not DE   | not DE  |
| EVM0012880 | LG5 | hypothetical protein L484_010 | not DE   | not DE   | 1.57897  | #####   |

|            |     |                               |          |          |          |         |
|------------|-----|-------------------------------|----------|----------|----------|---------|
| EVM0002869 | LG5 | hypothetical protein L484_010 | not DE   | not DE   | not DE   | not DE  |
| EVM0019647 | LG5 | hypothetical protein L484_011 | not DE   | not DE   | not DE   | not DE  |
| EVM0015456 | LG5 | hypothetical protein L484_025 | not DE   | not DE   | not DE   | not DE  |
| EVM0007453 | LG5 | hypothetical protein M569_052 | not DE   | not DE   | not DE   | not DE  |
| EVM0020398 | LG5 | hypothetical protein OsJ_1888 | not DE   | not DE   | not DE   | not DE  |
| EVM0021347 | LG5 | hypothetical protein PHAVU_00 | not DE   | not DE   | not DE   | not DE  |
| EVM0008595 | LG5 | hypothetical protein PHAVU_00 | not DE   | not DE   | not DE   | not DE  |
| EVM0018530 | LG5 | hypothetical protein PHAVU_00 | -3.48782 | 0.003233 | not DE   | not DE  |
| EVM0015996 | LG5 | hypothetical protein POPTR_00 | not DE   | not DE   | not DE   | not DE  |
| EVM0003695 | LG5 | hypothetical protein POPTR_00 | not DE   | not DE   | not DE   | not DE  |
| EVM0011756 | LG5 | hypothetical protein POPTR_00 | not DE   | not DE   | not DE   | not DE  |
| EVM0020725 | LG5 | hypothetical protein POPTR_00 | not DE   | not DE   | not DE   | not DE  |
| EVM0007682 | LG5 | hypothetical protein POPTR_00 | 2.1481   | 0.000448 | not DE   | not DE  |
| EVM0007667 | LG5 | hypothetical protein POPTR_00 | not DE   | not DE   | not DE   | not DE  |
| EVM0017244 | LG5 | hypothetical protein POPTR_00 | not DE   | not DE   | not DE   | not DE  |
| EVM0021421 | LG5 | hypothetical protein POPTR_00 | not DE   | not DE   | not DE   | not DE  |
| EVM0023847 | LG5 | hypothetical protein POPTR_00 | not DE   | not DE   | not DE   | not DE  |
| EVM0019953 | LG5 | hypothetical protein POPTR_00 | not DE   | not DE   | not DE   | not DE  |
| EVM0020816 | LG5 | hypothetical protein POPTR_00 | not DE   | not DE   | not DE   | not DE  |
| EVM0013019 | LG5 | hypothetical protein POPTR_00 | not DE   | not DE   | not DE   | not DE  |
| EVM0009829 | LG5 | hypothetical protein POPTR_00 | not DE   | not DE   | not DE   | not DE  |
| EVM0001411 | LG5 | hypothetical protein POPTR_00 | not DE   | not DE   | not DE   | not DE  |
| EVM0020103 | LG5 | hypothetical protein POPTR_00 | not DE   | not DE   | not DE   | not DE  |
| EVM0019678 | LG5 | hypothetical protein POPTR_00 | not DE   | not DE   | not DE   | not DE  |
| EVM0019793 | LG5 | hypothetical protein POPTR_00 | not DE   | not DE   | not DE   | not DE  |
| EVM0022866 | LG5 | hypothetical protein POPTR_00 | not DE   | not DE   | not DE   | not DE  |
| EVM0023263 | LG5 | hypothetical protein POPTR_00 | not DE   | not DE   | not DE   | not DE  |
| EVM0006780 | LG5 | hypothetical protein POPTR_00 | not DE   | not DE   | not DE   | not DE  |
| EVM0000992 | LG5 | hypothetical protein POPTR_00 | not DE   | not DE   | not DE   | not DE  |
| EVM0004542 | LG5 | hypothetical protein POPTR_00 | not DE   | not DE   | not DE   | not DE  |
| EVM0019173 | LG5 | hypothetical protein POPTR_00 | not DE   | not DE   | not DE   | not DE  |
| EVM0018237 | LG5 | hypothetical protein POPTR_00 | not DE   | not DE   | not DE   | not DE  |
| EVM0001790 | LG5 | hypothetical protein POPTR_00 | not DE   | not DE   | not DE   | not DE  |
| EVM0003114 | LG5 | hypothetical protein POPTR_00 | not DE   | not DE   | not DE   | not DE  |
| EVM0013404 | LG5 | hypothetical protein POPTR_00 | not DE   | not DE   | not DE   | not DE  |
| EVM0013812 | LG5 | hypothetical protein POPTR_00 | not DE   | not DE   | not DE   | not DE  |
| EVM0001500 | LG5 | hypothetical protein POPTR_00 | not DE   | not DE   | 1.057359 | 0.00591 |
| EVM0018352 | LG5 | hypothetical protein POPTR_00 | not DE   | not DE   | not DE   | not DE  |
| EVM0008436 | LG5 | hypothetical protein POPTR_00 | not DE   | not DE   | not DE   | not DE  |
| EVM0011593 | LG5 | hypothetical protein POPTR_00 | -2.19742 | 0.008809 | not DE   | not DE  |
| EVM0008079 | LG5 | hypothetical protein POPTR_00 | not DE   | not DE   | not DE   | not DE  |
| EVM0001997 | LG5 | hypothetical protein POPTR_00 | not DE   | not DE   | not DE   | not DE  |
| EVM0001006 | LG5 | hypothetical protein POPTR_00 | not DE   | not DE   | not DE   | not DE  |
| EVM0006481 | LG5 | hypothetical protein POPTR_00 | not DE   | not DE   | not DE   | not DE  |
| EVM0021758 | LG5 | hypothetical protein POPTR_00 | not DE   | not DE   | not DE   | not DE  |
| EVM0014407 | LG5 | hypothetical protein POPTR_00 | not DE   | not DE   | not DE   | not DE  |
| EVM0010144 | LG5 | hypothetical protein POPTR_00 | not DE   | not DE   | not DE   | not DE  |
| EVM0006922 | LG5 | hypothetical protein POPTR_00 | not DE   | not DE   | not DE   | not DE  |
| EVM0001092 | LG5 | hypothetical protein POPTR_00 | not DE   | not DE   | not DE   | not DE  |
| EVM0010265 | LG5 | hypothetical protein POPTR_00 | not DE   | not DE   | not DE   | not DE  |
| EVM0019922 | LG5 | hypothetical protein POPTR_10 | not DE   | not DE   | not DE   | not DE  |
| EVM0012632 | LG5 | hypothetical protein PRUPE_pp | not DE   | not DE   | not DE   | not DE  |
| EVM0016449 | LG5 | hypothetical protein PRUPE_pp | not DE   | not DE   | not DE   | not DE  |
| EVM0004249 | LG5 | hypothetical protein PRUPE_pp | not DE   | not DE   | not DE   | not DE  |

|            |     |                               |          |          |          |         |
|------------|-----|-------------------------------|----------|----------|----------|---------|
| EVM0014807 | LG5 | hypothetical protein PRUPE_pp | not DE   | not DE   | not DE   | not DE  |
| EVM0000503 | LG5 | hypothetical protein PRUPE_pp | not DE   | not DE   | not DE   | not DE  |
| EVM0023186 | LG5 | hypothetical protein PRUPE_pp | not DE   | not DE   | not DE   | not DE  |
| EVM0024190 | LG5 | hypothetical protein PRUPE_pp | not DE   | not DE   | not DE   | not DE  |
| EVM0021384 | LG5 | hypothetical protein PRUPE_pp | not DE   | not DE   | not DE   | not DE  |
| EVM0007054 | LG5 | hypothetical protein PRUPE_pp | not DE   | not DE   | not DE   | not DE  |
| EVM0008730 | LG5 | hypothetical protein PRUPE_pp | not DE   | not DE   | not DE   | not DE  |
| EVM0024342 | LG5 | hypothetical protein PRUPE_pp | not DE   | not DE   | not DE   | not DE  |
| EVM0018865 | LG5 | hypothetical protein PRUPE_pp | not DE   | not DE   | not DE   | not DE  |
| EVM0005843 | LG5 | hypothetical protein VITISV_C | not DE   | not DE   | not DE   | not DE  |
| EVM0022687 | LG5 | hypothetical protein VITISV_C | not DE   | not DE   | not DE   | not DE  |
| EVM0019135 | LG5 | hypothetical protein VITISV_C | not DE   | not DE   | not DE   | not DE  |
| EVM0022525 | LG5 | hypothetical protein VITISV_C | not DE   | not DE   | not DE   | not DE  |
| EVM0018151 | LG5 | hypothetical protein VITISV_C | not DE   | not DE   | not DE   | not DE  |
| EVM0017458 | LG5 | hypothetical protein VITISV_C | not DE   | not DE   | not DE   | not DE  |
| EVM0021246 | LG5 | hypothetical protein VITISV_C | not DE   | not DE   | not DE   | not DE  |
| EVM0000996 | LG5 | hypothetical protein VITISV_C | not DE   | not DE   | not DE   | not DE  |
| EVM0017229 | LG5 | hypothetical protein VITISV_C | not DE   | not DE   | not DE   | not DE  |
| EVM0011287 | LG5 | hypothetical protein glysoja  | not DE   | not DE   | not DE   | not DE  |
| EVM0006474 | LG5 | hypothetical protein glysoja  | not DE   | not DE   | not DE   | not DE  |
| EVM0005602 | LG5 | integrase                     | not DE   | not DE   | not DE   | not DE  |
| EVM0009778 | LG5 | integrase                     | not DE   | not DE   | not DE   | not DE  |
| EVM0012216 | LG5 | integrase                     | not DE   | not DE   | not DE   | not DE  |
| EVM0015182 | LG5 | leucine-rich repeat family pr | not DE   | not DE   | not DE   | not DE  |
| EVM0007191 | LG5 | malate dehydrogenase, putativ | not DE   | not DE   | not DE   | not DE  |
| EVM0004074 | LG5 | maternal effect embryo arrest | not DE   | not DE   | not DE   | not DE  |
| EVM0017885 | LG5 | maternal effect embryo arrest | not DE   | not DE   | not DE   | not DE  |
| EVM0004015 | LG5 | multidrug resistance pump, pu | not DE   | not DE   | not DE   | not DE  |
| EVM0017809 | LG5 | pentatricopeptide repeat-cont | not DE   | not DE   | not DE   | not DE  |
| EVM0004809 | LG5 | plant cadmium resistance 8 -l | not DE   | not DE   | not DE   | not DE  |
| EVM0014328 | LG5 | polyphenol oxidase            | 9.682535 | 9.63E-09 | not DE   | not DE  |
| EVM0017779 | LG5 | postsynaptic family protein   | not DE   | not DE   | not DE   | not DE  |
| EVM0019501 | LG5 | protein phosphatase 2c, putat | not DE   | not DE   | 1.045318 | 0.00096 |
| EVM0009233 | LG5 | putative receptor-like protei | not DE   | not DE   | not DE   | not DE  |
| EVM0005747 | LG5 | putative xyloglucan endotrans | not DE   | not DE   | not DE   | not DE  |
| EVM0018341 | LG5 | putative xyloglucan endotrans | not DE   | not DE   | not DE   | not DE  |
| EVM0021135 | LG5 | remorin-3 protein             | not DE   | not DE   | not DE   | not DE  |
| EVM0013259 | LG5 | retrotransposon protein, puta | not DE   | not DE   | not DE   | not DE  |
| EVM0015630 | LG5 | retrotransposon protein, puta | not DE   | not DE   | not DE   | not DE  |
| EVM0008773 | LG5 | serine-threonine protein kina | not DE   | not DE   | not DE   | not DE  |
| EVM0013472 | LG5 | serine-threonine protein kina | not DE   | not DE   | not DE   | not DE  |
| EVM0014814 | LG5 | short-chain dehydrogenase/red | not DE   | not DE   | not DE   | not DE  |
| EVM0016717 | LG5 | small nuclear ribonucleoprote | not DE   | not DE   | not DE   | not DE  |
| EVM0020090 | LG5 | small nuclear ribonucleoprote | not DE   | not DE   | not DE   | not DE  |
| EVM0017947 | LG5 | snare protein ykt6, putative  | not DE   | not DE   | not DE   | not DE  |
| EVM0004917 | LG5 | transcription factor, putativ | not DE   | not DE   | not DE   | not DE  |
| EVM0016556 | LG5 | triose-phosphate transporter  | not DE   | not DE   | not DE   | not DE  |
| EVM0017591 | LG5 | triose-phosphate transporter  | not DE   | not DE   | not DE   | not DE  |
| EVM0001487 | LG5 | unknown protein               | not DE   | not DE   | not DE   | not DE  |
| EVM0002187 | LG5 | unknown protein               | not DE   | not DE   | not DE   | not DE  |
| EVM0004299 | LG5 | unknown protein               | not DE   | not DE   | not DE   | not DE  |
| EVM0005044 | LG5 | unknown protein               | not DE   | not DE   | not DE   | not DE  |
| EVM0006020 | LG5 | unknown protein               | not DE   | not DE   | not DE   | not DE  |
| EVM0006781 | LG5 | unknown protein               | not DE   | not DE   | not DE   | not DE  |

|            |     |                         |          |          |          |         |
|------------|-----|-------------------------|----------|----------|----------|---------|
| EVM0007661 | LG5 | unknown protein         | not DE   | not DE   | not DE   | not DE  |
| EVM0010355 | LG5 | unknown protein         | not DE   | not DE   | not DE   | not DE  |
| EVM0012152 | LG5 | unknown protein         | not DE   | not DE   | not DE   | not DE  |
| EVM0012353 | LG5 | unknown protein         | not DE   | not DE   | not DE   | not DE  |
| EVM0012823 | LG5 | unknown protein         | not DE   | not DE   | not DE   | not DE  |
| EVM0014301 | LG5 | unknown protein         | not DE   | not DE   | not DE   | not DE  |
| EVM0015109 | LG5 | unknown protein         | not DE   | not DE   | not DE   | not DE  |
| EVM0016044 | LG5 | unknown protein         | not DE   | not DE   | not DE   | not DE  |
| EVM0016257 | LG5 | unknown protein         | not DE   | not DE   | not DE   | not DE  |
| EVM0016538 | LG5 | unknown protein         | not DE   | not DE   | not DE   | not DE  |
| EVM0017721 | LG5 | unknown protein         | not DE   | not DE   | not DE   | not DE  |
| EVM0017900 | LG5 | unknown protein         | not DE   | not DE   | not DE   | not DE  |
| EVM0018223 | LG5 | unknown protein         | not DE   | not DE   | not DE   | not DE  |
| EVM0019367 | LG5 | unknown protein         | not DE   | not DE   | not DE   | not DE  |
| EVM0021515 | LG5 | unknown protein         | not DE   | not DE   | not DE   | not DE  |
| EVM0022079 | LG5 | unknown protein         | not DE   | not DE   | not DE   | not DE  |
| EVM0022277 | LG5 | unknown protein         | not DE   | not DE   | not DE   | not DE  |
| EVM0022608 | LG5 | unknown protein         | not DE   | not DE   | not DE   | not DE  |
| EVM0023282 | LG5 | unknown protein         | not DE   | not DE   | not DE   | not DE  |
| EVM0023337 | LG5 | unknown protein         | not DE   | not DE   | not DE   | not DE  |
| EVM0023346 | LG5 | unknown protein         | not DE   | not DE   | not DE   | not DE  |
| EVM0023950 | LG5 | unknown protein         | not DE   | not DE   | not DE   | not DE  |
| EVM0000223 | LG5 | unnamed protein product | not DE   | not DE   | not DE   | not DE  |
| EVM0001890 | LG5 | unnamed protein product | not DE   | not DE   | not DE   | not DE  |
| EVM0002859 | LG5 | unnamed protein product | not DE   | not DE   | not DE   | not DE  |
| EVM0003066 | LG5 | unnamed protein product | not DE   | not DE   | not DE   | not DE  |
| EVM0004872 | LG5 | unnamed protein product | not DE   | not DE   | not DE   | not DE  |
| EVM0005046 | LG5 | unnamed protein product | -4.21087 | 0.033603 | not DE   | not DE  |
| EVM0005362 | LG5 | unnamed protein product | not DE   | not DE   | not DE   | not DE  |
| EVM0006403 | LG5 | unnamed protein product | not DE   | not DE   | not DE   | not DE  |
| EVM0007011 | LG5 | unnamed protein product | not DE   | not DE   | not DE   | not DE  |
| EVM0007104 | LG5 | unnamed protein product | -2.26403 | 0.012416 | not DE   | not DE  |
| EVM0007247 | LG5 | unnamed protein product | not DE   | not DE   | not DE   | not DE  |
| EVM0007844 | LG5 | unnamed protein product | not DE   | not DE   | -1.45264 | 0.00149 |
| EVM0008208 | LG5 | unnamed protein product | not DE   | not DE   | not DE   | not DE  |
| EVM0008556 | LG5 | unnamed protein product | not DE   | not DE   | not DE   | not DE  |
| EVM0008790 | LG5 | unnamed protein product | not DE   | not DE   | not DE   | not DE  |
| EVM0009616 | LG5 | unnamed protein product | not DE   | not DE   | not DE   | not DE  |
| EVM0010173 | LG5 | unnamed protein product | not DE   | not DE   | not DE   | not DE  |
| EVM0010525 | LG5 | unnamed protein product | not DE   | not DE   | not DE   | not DE  |
| EVM0010893 | LG5 | unnamed protein product | not DE   | not DE   | not DE   | not DE  |
| EVM0011379 | LG5 | unnamed protein product | not DE   | not DE   | 1.401106 | 0.01121 |
| EVM0011628 | LG5 | unnamed protein product | not DE   | not DE   | not DE   | not DE  |
| EVM0011720 | LG5 | unnamed protein product | not DE   | not DE   | not DE   | not DE  |
| EVM0012601 | LG5 | unnamed protein product | not DE   | not DE   | not DE   | not DE  |
| EVM0012608 | LG5 | unnamed protein product | not DE   | not DE   | not DE   | not DE  |
| EVM0013437 | LG5 | unnamed protein product | not DE   | not DE   | not DE   | not DE  |
| EVM0014323 | LG5 | unnamed protein product | not DE   | not DE   | not DE   | not DE  |
| EVM0016811 | LG5 | unnamed protein product | not DE   | not DE   | not DE   | not DE  |
| EVM0017161 | LG5 | unnamed protein product | not DE   | not DE   | not DE   | not DE  |
| EVM0017207 | LG5 | unnamed protein product | not DE   | not DE   | not DE   | not DE  |
| EVM0019606 | LG5 | unnamed protein product | 1.751466 | 0.049552 | not DE   | not DE  |
| EVM0021880 | LG5 | unnamed protein product | not DE   | not DE   | not DE   | not DE  |
| EVM0023521 | LG5 | unnamed protein product | not DE   | not DE   | not DE   | not DE  |

|            |     |                                         |          |          |          |         |
|------------|-----|-----------------------------------------|----------|----------|----------|---------|
| EVM0024362 | LG5 | unnamed protein product                 | not DE   | not DE   | not DE   | not DE  |
| EVM0024606 | LG5 | unnamed protein product                 | not DE   | not DE   | 1.722636 | 0.00042 |
| EVM0010942 | LG5 | vegetative storage protein              | not DE   | not DE   | not DE   | not DE  |
| EVM0002400 | LG5 | zinc finger family protein              | not DE   | not DE   | not DE   | not DE  |
| EVM0009026 | LG5 | zinc/iron transporter, putative         | not DE   | not DE   | not DE   | not DE  |
| EVM0015457 | LG5 | zinc/iron transporter, putative         | not DE   | not DE   | not DE   | not DE  |
| EVM0013370 | LG6 | (DL)-glycerol-3-phosphatase             | not DE   | not DE   | not DE   | not DE  |
| EVM0012459 | LG6 | 1-aminocyclopropane-1-carboxylate       | not DE   | not DE   | not DE   | not DE  |
| EVM0015312 | LG6 | 12-oxophytodienoate reductase           | not DE   | not DE   | not DE   | not DE  |
| EVM0009738 | LG6 | 2-alkenal reductase (NADP+)             | not DE   | not DE   | not DE   | not DE  |
| EVM0011641 | LG6 | 2-alkenal reductase (NADP+)             | not DE   | not DE   | not DE   | not DE  |
| EVM0016986 | LG6 | 2-alkenal reductase (NADP+)             | not DE   | not DE   | 3.017502 | 0.00306 |
| EVM0020531 | LG6 | 2-alkenal reductase (NADP+)             | not DE   | not DE   | not DE   | not DE  |
| EVM0021302 | LG6 | 2-alkenal reductase (NADP+)             | not DE   | not DE   | not DE   | not DE  |
| EVM0001076 | LG6 | 2-methoxy-6-polyprenyl-1,4-bisphosphate | not DE   | not DE   | not DE   | not DE  |
| EVM0018796 | LG6 | 3-hydroxyisobutyryl-CoA hydratase       | not DE   | not DE   | not DE   | not DE  |
| EVM0013130 | LG6 | 40S ribosomal protein S24-2             | not DE   | not DE   | not DE   | not DE  |
| EVM0001869 | LG6 | 40S ribosomal protein S3-3              | not DE   | not DE   | not DE   | not DE  |
| EVM0001039 | LG6 | 5'-3' exoribonuclease                   | not DE   | not DE   | -1.12602 | 0.00025 |
| EVM0012713 | LG6 | 5'-adenylylsulfate reductase            | not DE   | not DE   | not DE   | not DE  |
| EVM0003733 | LG6 | 50S ribosomal protein L3, chain 1       | not DE   | not DE   | not DE   | not DE  |
| EVM0002857 | LG6 | 60S acidic ribosomal protein L24        | not DE   | not DE   | not DE   | not DE  |
| EVM0011373 | LG6 | ATPase family AAA domain-containing     | not DE   | not DE   | not DE   | not DE  |
| EVM0013922 | LG6 | B3 domain-containing protein            | not DE   | not DE   | not DE   | not DE  |
| EVM0016349 | LG6 | B3 domain-containing protein            | not DE   | not DE   | not DE   | not DE  |
| EVM0018816 | LG6 | B3 domain-containing protein            | not DE   | not DE   | not DE   | not DE  |
| EVM0023270 | LG6 | B3 domain-containing protein            | not DE   | not DE   | not DE   | not DE  |
| EVM0017226 | LG6 | B3 domain-containing protein            | not DE   | not DE   | not DE   | not DE  |
| EVM0001957 | LG6 | BTB/POZ domain-containing protein       | not DE   | not DE   | not DE   | not DE  |
| EVM0021576 | LG6 | C-Myc-binding protein homolog           | not DE   | not DE   | not DE   | not DE  |
| EVM0021972 | LG6 | C2 and GRAM domain-containing protein   | not DE   | not DE   | not DE   | not DE  |
| EVM0011860 | LG6 | CASP-like protein POPTRDRAFT            | not DE   | not DE   | 1.915097 | 0.02128 |
| EVM0012646 | LG6 | CASP-like protein POPTRDRAFT            | 2.969554 | 0.017973 | not DE   | not DE  |
| EVM0003134 | LG6 | CBL-interacting serine/threonine kinase | not DE   | not DE   | not DE   | not DE  |
| EVM0008861 | LG6 | CBS domain-containing protein           | not DE   | not DE   | not DE   | not DE  |
| EVM0019431 | LG6 | CRC domain-containing protein           | not DE   | not DE   | not DE   | not DE  |
| EVM0022137 | LG6 | DEAD-box ATP-dependent RNA helicase     | not DE   | not DE   | not DE   | not DE  |
| EVM0012994 | LG6 | DEAD-box ATP-dependent RNA helicase     | not DE   | not DE   | not DE   | not DE  |
| EVM0010029 | LG6 | DEAD-box ATP-dependent RNA helicase     | not DE   | not DE   | not DE   | not DE  |
| EVM0023434 | LG6 | DNA excision repair protein             | not DE   | not DE   | not DE   | not DE  |
| EVM0021303 | LG6 | DNA ligase 1-like                       | not DE   | not DE   | not DE   | not DE  |
| EVM0016750 | LG6 | DNA ligase 1-like isoform X1            | 1.751899 | 0.005483 | not DE   | not DE  |
| EVM0015155 | LG6 | DNA mismatch repair protein             | 1.706559 | 0.007153 | not DE   | not DE  |
| EVM0023717 | LG6 | DNA repair protein RAD51 homolog        | not DE   | not DE   | not DE   | not DE  |
| EVM0024481 | LG6 | DNA repair protein recA homolog         | not DE   | not DE   | not DE   | not DE  |
| EVM0017019 | LG6 | E3 ubiquitin-protein ligase             | not DE   | not DE   | not DE   | not DE  |
| EVM0005844 | LG6 | EG45-like domain containing protein     | not DE   | not DE   | not DE   | not DE  |
| EVM0010183 | LG6 | EIN3-binding F-box protein 2            | not DE   | not DE   | not DE   | not DE  |
| EVM0010858 | LG6 | ELMO domain-containing protein          | not DE   | not DE   | not DE   | not DE  |
| EVM0007406 | LG6 | EPIDERMAL PATTERNING FACTOR             | not DE   | not DE   | not DE   | not DE  |
| EVM0017933 | LG6 | ER membrane protein complex             | not DE   | not DE   | not DE   | not DE  |
| EVM0010919 | LG6 | F-box protein At2g02240-like            | not DE   | not DE   | not DE   | not DE  |
| EVM0017945 | LG6 | F-box protein At2g02240-like            | not DE   | not DE   | not DE   | not DE  |
| EVM0019623 | LG6 | F-box protein At5g03970-like            | not DE   | not DE   | not DE   | not DE  |

|            |     |                               |          |          |          |         |
|------------|-----|-------------------------------|----------|----------|----------|---------|
| EVM0012710 | LG6 | F-box protein CPR30-like      | not DE   | not DE   | not DE   | not DE  |
| EVM0004529 | LG6 | F-box protein CPR30-like iso  | not DE   | not DE   | not DE   | not DE  |
| EVM0010699 | LG6 | F-box/FBD/LRR-repeat protein  | not DE   | not DE   | not DE   | not DE  |
| EVM0010971 | LG6 | F-box/FBD/LRR-repeat protein  | not DE   | not DE   | not DE   | not DE  |
| EVM0005507 | LG6 | F-box/kelch-repeat protein A  | not DE   | not DE   | not DE   | not DE  |
| EVM0003163 | LG6 | G-type lectin S-receptor-like | not DE   | not DE   | not DE   | not DE  |
| EVM0005237 | LG6 | GDP-mannose transporter GONS  | not DE   | not DE   | not DE   | not DE  |
| EVM0000830 | LG6 | GDP-mannose transporter GONS  | not DE   | not DE   | not DE   | not DE  |
| EVM0017716 | LG6 | GDSL esterase/lipase Atlg093  | not DE   | not DE   | not DE   | not DE  |
| EVM0012863 | LG6 | GPCR-type G protein 1         | not DE   | not DE   | not DE   | not DE  |
| EVM0009419 | LG6 | GTP-binding nuclear protein   | not DE   | not DE   | not DE   | not DE  |
| EVM0004691 | LG6 | LOB domain-containing protein | not DE   | not DE   | not DE   | not DE  |
| EVM0017832 | LG6 | LOB domain-containing protein | not DE   | not DE   | not DE   | not DE  |
| EVM0022933 | LG6 | LOB domain-containing protein | not DE   | not DE   | not DE   | not DE  |
| EVM0020879 | LG6 | LOW QUALITY PROTEIN: K(+) ef  | not DE   | not DE   | not DE   | not DE  |
| EVM0013058 | LG6 | LOW QUALITY PROTEIN: ammoniu  | not DE   | not DE   | not DE   | not DE  |
| EVM0008176 | LG6 | LOW QUALITY PROTEIN: peroxid  | not DE   | not DE   | not DE   | not DE  |
| EVM0002200 | LG6 | LOW QUALITY PROTEIN: subtilin | not DE   | not DE   | not DE   | not DE  |
| EVM0000006 | LG6 | LOW QUALITY PROTEIN: sugar t  | not DE   | not DE   | not DE   | not DE  |
| EVM0021813 | LG6 | LOW QUALITY PROTEIN: unchara  | not DE   | not DE   | not DE   | not DE  |
| EVM0001126 | LG6 | LRR receptor-like serine/thr  | not DE   | not DE   | not DE   | not DE  |
| EVM0010900 | LG6 | LRR receptor-like serine/thr  | not DE   | not DE   | not DE   | not DE  |
| EVM0008718 | LG6 | NAC domain-containing protei  | 2.354492 | 0.014448 | not DE   | not DE  |
| EVM0018852 | LG6 | NAC domain-containing protei  | not DE   | not DE   | not DE   | not DE  |
| EVM0010696 | LG6 | PHD finger protein ING2       | not DE   | not DE   | not DE   | not DE  |
| EVM0012230 | LG6 | PRA1 family protein E-like    | not DE   | not DE   | not DE   | not DE  |
| EVM0012928 | LG6 | PRA1 family protein F2-like   | not DE   | not DE   | not DE   | not DE  |
| EVM0015168 | LG6 | PXMP2/4 family protein 2-like | not DE   | not DE   | not DE   | not DE  |
| EVM0000253 | LG6 | R3H domain-containing protei  | not DE   | not DE   | not DE   | not DE  |
| EVM0023550 | LG6 | RING-H2 finger protein ATL43  | not DE   | not DE   | not DE   | not DE  |
| EVM0022672 | LG6 | RING-H2 finger protein ATL52  | not DE   | not DE   | not DE   | not DE  |
| EVM0008075 | LG6 | RING-box protein 1a-like      | not DE   | not DE   | not DE   | not DE  |
| EVM0020142 | LG6 | SNF1-related protein kinase   | not DE   | not DE   | not DE   | not DE  |
| EVM0019378 | LG6 | SPX domain-containing protei  | -2.22441 | 0.041635 | not DE   | not DE  |
| EVM0000272 | LG6 | TATA-box-binding protein 2    | not DE   | not DE   | not DE   | not DE  |
| EVM0024643 | LG6 | TBC1 domain family member 17  | not DE   | not DE   | not DE   | not DE  |
| EVM0008015 | LG6 | TOM1-like protein 2           | not DE   | not DE   | not DE   | not DE  |
| EVM0003097 | LG6 | U-box domain-containing prot  | not DE   | not DE   | not DE   | not DE  |
| EVM0012165 | LG6 | U-box domain-containing prot  | not DE   | not DE   | not DE   | not DE  |
| EVM0022261 | LG6 | U6 snRNA-associated Sm-like   | not DE   | not DE   | 1.048861 | 0.00858 |
| EVM0004656 | LG6 | UBP1-associated proteins 1C   | not DE   | not DE   | -1.03642 | 0.00106 |
| EVM0000295 | LG6 | UDP-glycosyltransferase 83A1  | not DE   | not DE   | not DE   | not DE  |
| EVM0013451 | LG6 | UDP-glycosyltransferase 83A1  | not DE   | not DE   | not DE   | not DE  |
| EVM0020072 | LG6 | UDP-glycosyltransferase 83A1  | not DE   | not DE   | not DE   | not DE  |
| EVM0017621 | LG6 | UDP-glycosyltransferase 91C1  | not DE   | not DE   | not DE   | not DE  |
| EVM0001035 | LG6 | UPF0603 protein Atlg54780, c  | -1.12405 | 0.026363 | not DE   | not DE  |
| EVM0001691 | LG6 | V-type proton ATPase subunit  | not DE   | not DE   | not DE   | not DE  |
| EVM0007712 | LG6 | V-type proton ATPase subunit  | not DE   | not DE   | not DE   | not DE  |
| EVM0013412 | LG6 | VIN3-like protein 1-like iso  | not DE   | not DE   | not DE   | not DE  |
| EVM0012693 | LG6 | WD repeat-containing protei   | not DE   | not DE   | -1.31729 | #####   |
| EVM0011258 | LG6 | WD repeat-containing protei   | not DE   | not DE   | not DE   | not DE  |
| EVM0022444 | LG6 | WD repeat-containing protei   | not DE   | not DE   | not DE   | not DE  |
| EVM0007465 | LG6 | acetyl-CoA acetyltransferase  | not DE   | not DE   | not DE   | not DE  |
| EVM0001645 | LG6 | acetyl-CoA acetyltransferase  | not DE   | not DE   | not DE   | not DE  |



|            |     |                                         |          |          |          |         |
|------------|-----|-----------------------------------------|----------|----------|----------|---------|
| EVM0006671 | LG6 | acetyl-CoA acetyltransferase            | not DE   | not DE   | not DE   | not DE  |
| EVM0006400 | LG6 | acyl carrier protein 1, chloroplast     | not DE   | not DE   | 1.034376 | 0.00068 |
| EVM0010504 | LG6 | acyl carrier protein 2, mitochondrial   | not DE   | not DE   | not DE   | not DE  |
| EVM0021683 | LG6 | acyl-CoA--sterol O-acyltransferase      | not DE   | not DE   | not DE   | not DE  |
| EVM0016342 | LG6 | acyl-protein thioesterase 2             | not DE   | not DE   | not DE   | not DE  |
| EVM0012261 | LG6 | adenylate cyclase, terminal             | not DE   | not DE   | not DE   | not DE  |
| EVM0004639 | LG6 | agamous-like MADS-box protein           | not DE   | not DE   | not DE   | not DE  |
| EVM0002024 | LG6 | alcohol dehydrogenase-like 2            | not DE   | not DE   | not DE   | not DE  |
| EVM0012764 | LG6 | alkaline ceramidase 3-like              | not DE   | not DE   | not DE   | not DE  |
| EVM0007432 | LG6 | altered inheritance rate of             | not DE   | not DE   | not DE   | not DE  |
| EVM0008501 | LG6 | ammonium transporter 3 member           | not DE   | not DE   | not DE   | not DE  |
| EVM0007285 | LG6 | ankyrin repeat-containing protein       | not DE   | not DE   | not DE   | not DE  |
| EVM0010862 | LG6 | ankyrin repeat-containing protein       | not DE   | not DE   | not DE   | not DE  |
| EVM0001194 | LG6 | ankyrin-1-like                          | not DE   | not DE   | not DE   | not DE  |
| EVM0000127 | LG6 | aspartic proteinase CDR1-like           | not DE   | not DE   | not DE   | not DE  |
| EVM0010115 | LG6 | aspartic proteinase-like                | not DE   | not DE   | not DE   | not DE  |
| EVM0014761 | LG6 | auxin-responsive protein IAA            | not DE   | not DE   | not DE   | not DE  |
| EVM0007741 | LG6 | bark storage protein A                  | not DE   | not DE   | not DE   | not DE  |
| EVM0007384 | LG6 | benzyl alcohol O-benzoyltransferase     | not DE   | not DE   | not DE   | not DE  |
| EVM0018698 | LG6 | bidirectional sugar transporter         | not DE   | not DE   | not DE   | not DE  |
| EVM0012135 | LG6 | bifunctional 3-dehydroquinase           | not DE   | not DE   | not DE   | not DE  |
| EVM0022990 | LG6 | boron transporter 4                     | not DE   | not DE   | not DE   | not DE  |
| EVM0017678 | LG6 | calcium-transporting ATPase             | not DE   | not DE   | not DE   | not DE  |
| EVM0011239 | LG6 | calcium-transporting ATPase             | not DE   | not DE   | not DE   | not DE  |
| EVM0014186 | LG6 | calreticulin-3-like                     | -2.296   | 1.41E-08 | -1.07446 | 0.01552 |
| EVM0020689 | LG6 | cannabidiolic acid synthase             | not DE   | not DE   | not DE   | not DE  |
| EVM0014289 | LG6 | cation/calcium exchanger 2-like         | 1.721379 | 0.000857 | not DE   | not DE  |
| EVM0013270 | LG6 | cation/calcium exchanger 4-like         | -1.68701 | 0.024094 | not DE   | not DE  |
| EVM0007768 | LG6 | cellulose synthase-like protein         | not DE   | not DE   | not DE   | not DE  |
| EVM0003001 | LG6 | cellulose synthase-like protein         | not DE   | not DE   | not DE   | not DE  |
| EVM0006173 | LG6 | cellulose synthase-like protein         | not DE   | not DE   | not DE   | not DE  |
| EVM0000283 | LG6 | centrosomal protein of 83 kDa           | -1.30732 | 0.038442 | not DE   | not DE  |
| EVM0021426 | LG6 | chaperone protein dnaJ 11, chloroplast  | not DE   | not DE   | not DE   | not DE  |
| EVM0012573 | LG6 | chloroplast envelope membrane protein   | not DE   | not DE   | not DE   | not DE  |
| EVM0015788 | LG6 | choline monooxygenase, chloroplast      | not DE   | not DE   | not DE   | not DE  |
| EVM0015156 | LG6 | cingulin-like isoform X1                | 1.276693 | 0.002963 | not DE   | not DE  |
| EVM0011704 | LG6 | coiled-coil domain-containing protein   | not DE   | not DE   | not DE   | not DE  |
| EVM0018499 | LG6 | cycloartenol synthase 2-like            | not DE   | not DE   | not DE   | not DE  |
| EVM0000419 | LG6 | cysteine synthase-like isoform          | not DE   | not DE   | not DE   | not DE  |
| EVM0004143 | LG6 | cysteine synthase-like isoform          | not DE   | not DE   | not DE   | not DE  |
| EVM0008060 | LG6 | cytochrome P450 71D8-like               | not DE   | not DE   | not DE   | not DE  |
| EVM0011348 | LG6 | cytochrome P450 71D8-like               | not DE   | not DE   | not DE   | not DE  |
| EVM0022450 | LG6 | cytochrome P450 71D8-like               | not DE   | not DE   | not DE   | not DE  |
| EVM0002572 | LG6 | cytochrome P450 89A2-like               | not DE   | not DE   | not DE   | not DE  |
| EVM0002745 | LG6 | cytochrome P450 89A2-like               | not DE   | not DE   | not DE   | not DE  |
| EVM0006521 | LG6 | cytochrome P450 89A2-like               | not DE   | not DE   | not DE   | not DE  |
| EVM0014664 | LG6 | cytokinesis protein sepA-like           | not DE   | not DE   | not DE   | not DE  |
| EVM0002730 | LG6 | cytokinin dehydrogenase 3-like          | not DE   | not DE   | not DE   | not DE  |
| EVM0008603 | LG6 | cytokinin dehydrogenase 3-like          | not DE   | not DE   | not DE   | not DE  |
| EVM0012074 | LG6 | cytosolic Fe-S cluster assembly protein | not DE   | not DE   | not DE   | not DE  |
| EVM0023725 | LG6 | dehydrogenase/reductase SDR             | not DE   | not DE   | not DE   | not DE  |
| EVM0007081 | LG6 | delta(8)-fatty-acid desaturase          | not DE   | not DE   | 1.224231 | #####   |
| EVM0020526 | LG6 | delta(8)-fatty-acid desaturase          | not DE   | not DE   | not DE   | not DE  |
| EVM0013760 | LG6 | deoxyhypusine synthase-like             | not DE   | not DE   | not DE   | not DE  |

|            |     |                               |          |          |          |        |
|------------|-----|-------------------------------|----------|----------|----------|--------|
| EVM0001270 | LG6 | disease resistance RPP13-like | not DE   | not DE   | not DE   | not DE |
| EVM0003703 | LG6 | disease resistance RPP13-like | 1.944135 | 0.031889 | not DE   | not DE |
| EVM0006628 | LG6 | disease resistance RPP13-like | not DE   | not DE   | not DE   | not DE |
| EVM0007952 | LG6 | disease resistance RPP13-like | not DE   | not DE   | not DE   | not DE |
| EVM0022006 | LG6 | disease resistance protein R  | not DE   | not DE   | not DE   | not DE |
| EVM0004388 | LG6 | dnaJ homolog subfamily C mem  | not DE   | not DE   | not DE   | not DE |
| EVM0008070 | LG6 | dnaJ homolog subfamily C mem  | not DE   | not DE   | not DE   | not DE |
| EVM0006154 | LG6 | enhancer of mRNA-decapping p  | not DE   | not DE   | -1.07852 | #####  |
| EVM0007002 | LG6 | ethylene-responsive transcri  | not DE   | not DE   | not DE   | not DE |
| EVM0005842 | LG6 | eukaryotic initiation factor  | not DE   | not DE   | not DE   | not DE |
| EVM0018955 | LG6 | eukaryotic translation initi  | not DE   | not DE   | not DE   | not DE |
| EVM0024287 | LG6 | eukaryotic translation initi  | not DE   | not DE   | -1.00892 | #####  |
| EVM0013142 | LG6 | exportin-1                    | not DE   | not DE   | not DE   | not DE |
| EVM0016886 | LG6 | exportin-4-like isoform X1    | not DE   | not DE   | not DE   | not DE |
| EVM0018723 | LG6 | far upstream element-binding  | not DE   | not DE   | not DE   | not DE |
| EVM0005162 | LG6 | flap endonuclease 1 isoform   | not DE   | not DE   | not DE   | not DE |
| EVM0003990 | LG6 | galactose oxidase-like        | not DE   | not DE   | not DE   | not DE |
| EVM0004675 | LG6 | galactose oxidase-like        | not DE   | not DE   | not DE   | not DE |
| EVM0016176 | LG6 | galactose oxidase-like        | not DE   | not DE   | not DE   | not DE |
| EVM0004526 | LG6 | gamma-tubulin complex compon  | not DE   | not DE   | not DE   | not DE |
| EVM0001083 | LG6 | geranylgeranyl pyrophosphate  | not DE   | not DE   | not DE   | not DE |
| EVM0003651 | LG6 | geranylgeranyl pyrophosphate  | not DE   | not DE   | not DE   | not DE |
| EVM0005928 | LG6 | geranylgeranyl pyrophosphate  | not DE   | not DE   | not DE   | not DE |
| EVM0011666 | LG6 | geranylgeranyl pyrophosphate  | not DE   | not DE   | not DE   | not DE |
| EVM0013427 | LG6 | geranylgeranyl pyrophosphate  | not DE   | not DE   | not DE   | not DE |
| EVM0016503 | LG6 | geranylgeranyl pyrophosphate  | not DE   | not DE   | not DE   | not DE |
| EVM0018728 | LG6 | geranylgeranyl pyrophosphate  | not DE   | not DE   | not DE   | not DE |
| EVM0019066 | LG6 | geranylgeranyl pyrophosphate  | not DE   | not DE   | not DE   | not DE |
| EVM0022406 | LG6 | geranylgeranyl pyrophosphate  | not DE   | not DE   | not DE   | not DE |
| EVM0014398 | LG6 | geranylgeranyl transferase t  | not DE   | not DE   | not DE   | not DE |
| EVM0005295 | LG6 | germin-like protein subfamil  | not DE   | not DE   | not DE   | not DE |
| EVM0005113 | LG6 | gibberellin 3-beta-dioxygena  | not DE   | not DE   | not DE   | not DE |
| EVM0009919 | LG6 | glucan endo-1,3-beta-glucosi  | not DE   | not DE   | not DE   | not DE |
| EVM0020564 | LG6 | glucan endo-1,3-beta-glucosi  | not DE   | not DE   | not DE   | not DE |
| EVM0013550 | LG6 | glucose-6-phosphate 1-dehydr  | not DE   | not DE   | not DE   | not DE |
| EVM0003494 | LG6 | glutamate-rich WD repeat-con  | not DE   | not DE   | not DE   | not DE |
| EVM0009734 | LG6 | glutathione synthetase, chl   | not DE   | not DE   | not DE   | not DE |
| EVM0019461 | LG6 | glycine-rich cell wall struc  | not DE   | not DE   | not DE   | not DE |
| EVM0013267 | LG6 | glycine-rich protein A3-like  | not DE   | not DE   | not DE   | not DE |
| EVM0005513 | LG6 | guanine nucleotide-binding p  | not DE   | not DE   | not DE   | not DE |
| EVM0007788 | LG6 | heat shock factor protein HS  | not DE   | not DE   | not DE   | not DE |
| EVM0012328 | LG6 | heavy metal-associated isopr  | not DE   | not DE   | not DE   | not DE |
| EVM0001905 | LG6 | histone-lysine N-methyltrans  | not DE   | not DE   | not DE   | not DE |
| EVM0003863 | LG6 | homeobox protein ATH1-like    | not DE   | not DE   | not DE   | not DE |
| EVM0012560 | LG6 | homeobox-leucine zipper prot  | not DE   | not DE   | not DE   | not DE |
| EVM0021020 | LG6 | hydroxymethylglutaryl-CoA ly  | not DE   | not DE   | not DE   | not DE |
| EVM0007602 | LG6 | inactive protein kinase SELM  | not DE   | not DE   | not DE   | not DE |
| EVM0003162 | LG6 | indole-3-pyruvate monooxygen  | not DE   | not DE   | not DE   | not DE |
| EVM0001037 | LG6 | inositol-phosphate phosphata  | not DE   | not DE   | not DE   | not DE |
| EVM0006051 | LG6 | isoamylase 1, chloroplastic-  | not DE   | not DE   | not DE   | not DE |
| EVM0021724 | LG6 | isopentenyl-diphosphate Delt  | not DE   | not DE   | not DE   | not DE |
| EVM0010624 | LG6 | kinesin-1-like protein PSS1-  | not DE   | not DE   | not DE   | not DE |
| EVM0000384 | LG6 | kinesin-related protein 6-li  | not DE   | not DE   | not DE   | not DE |
| EVM0022110 | LG6 | leucine-rich repeat extensin  | not DE   | not DE   | not DE   | not DE |

|            |     |                               |          |          |          |         |
|------------|-----|-------------------------------|----------|----------|----------|---------|
| EVM0011799 | LG6 | leucine-rich repeat receptor  | not DE   | not DE   | not DE   | not DE  |
| EVM0000904 | LG6 | light-inducible protein CPRF  | not DE   | not DE   | not DE   | not DE  |
| EVM0022666 | LG6 | lysosomal beta glucosidase-1  | not DE   | not DE   | -2.07108 | 0.04681 |
| EVM0016590 | LG6 | mediator of RNA polymerase I  | not DE   | not DE   | not DE   | not DE  |
| EVM0012225 | LG6 | methyl-CpG-binding domain-co  | not DE   | not DE   | not DE   | not DE  |
| EVM0000806 | LG6 | methylthioribose-1-phosphate  | 1.220574 | 0.00325  | not DE   | not DE  |
| EVM0023566 | LG6 | microtubule-associated prote  | not DE   | not DE   | not DE   | not DE  |
| EVM0000185 | LG6 | microtubule-associated prote  | not DE   | not DE   | not DE   | not DE  |
| EVM0007690 | LG6 | mitochondrial substrate carr  | not DE   | not DE   | not DE   | not DE  |
| EVM0016648 | LG6 | mitochondrial-processing pep  | not DE   | not DE   | not DE   | not DE  |
| EVM0006729 | LG6 | mitogen-activated protein ki  | not DE   | not DE   | not DE   | not DE  |
| EVM0018453 | LG6 | monoacylglycerol lipase ABHD  | not DE   | not DE   | not DE   | not DE  |
| EVM0012502 | LG6 | multiprotein-bridging factor  | -2.06693 | 0.025627 | -1.29698 | #####   |
| EVM0010773 | LG6 | multisubstrate pseudouridine  | not DE   | not DE   | not DE   | not DE  |
| EVM0000751 | LG6 | myb-related protein Myb4-like | not DE   | not DE   | not DE   | not DE  |
| EVM0021765 | LG6 | myosin-11                     | not DE   | not DE   | not DE   | not DE  |
| EVM0017486 | LG6 | myosin-17-like isoform X1     | not DE   | not DE   | not DE   | not DE  |
| EVM0006961 | LG6 | myosin-8-like                 | not DE   | not DE   | not DE   | not DE  |
| EVM0010370 | LG6 | nitrate transporter 1.4-like  | not DE   | not DE   | not DE   | not DE  |
| EVM0010248 | LG6 | non-specific phospholipase C  | not DE   | not DE   | not DE   | not DE  |
| EVM0020169 | LG6 | non-specific phospholipase C  | not DE   | not DE   | not DE   | not DE  |
| EVM0001207 | LG6 | nuclear pore complex protein  | 1.126353 | 0.006058 | not DE   | not DE  |
| EVM0012464 | LG6 | nuclear pore complex protein  | not DE   | not DE   | not DE   | not DE  |
| EVM0012549 | LG6 | nucleolar complex protein 2   | not DE   | not DE   | not DE   | not DE  |
| EVM0001138 | LG6 | nucleosome assembly protein   | not DE   | not DE   | not DE   | not DE  |
| EVM0000895 | LG6 | nudix hydrolase 2-like isofo  | not DE   | not DE   | not DE   | not DE  |
| EVM0003556 | LG6 | nudix hydrolase 20, chloropl  | not DE   | not DE   | not DE   | not DE  |
| EVM0006503 | LG6 | nudix hydrolase 20, chloropl  | not DE   | not DE   | not DE   | not DE  |
| EVM0021655 | LG6 | nudix hydrolase 20, chloropl  | not DE   | not DE   | not DE   | not DE  |
| EVM0022708 | LG6 | origin recognition complex s  | not DE   | not DE   | -1.19605 | 0.00517 |
| EVM0009304 | LG6 | oxysterol-binding protein-re  | not DE   | not DE   | not DE   | not DE  |
| EVM0018858 | LG6 | oxysterol-binding protein-re  | not DE   | not DE   | not DE   | not DE  |
| EVM0006211 | LG6 | pathogenesis-related homeod   | not DE   | not DE   | not DE   | not DE  |
| EVM0002542 | LG6 | pathogenesis-related protein  | 4.539815 | 0.008977 | not DE   | not DE  |
| EVM0002829 | LG6 | pathogenesis-related protein  | 2.974083 | 0.013358 | not DE   | not DE  |
| EVM0005929 | LG6 | pentatricopeptide repeat-con  | not DE   | not DE   | not DE   | not DE  |
| EVM0001371 | LG6 | pentatricopeptide repeat-con  | not DE   | not DE   | not DE   | not DE  |
| EVM0000659 | LG6 | pentatricopeptide repeat-con  | 1.773649 | 0.001727 | not DE   | not DE  |
| EVM0006161 | LG6 | pentatricopeptide repeat-con  | not DE   | not DE   | not DE   | not DE  |
| EVM0019112 | LG6 | pentatricopeptide repeat-con  | 1.634023 | 1.96E-06 | not DE   | not DE  |
| EVM0000982 | LG6 | pentatricopeptide repeat-con  | 1.918123 | 4.84E-05 | not DE   | not DE  |
| EVM0001549 | LG6 | pentatricopeptide repeat-con  | 1.433306 | 0.045149 | not DE   | not DE  |
| EVM0009315 | LG6 | pentatricopeptide repeat-con  | not DE   | not DE   | not DE   | not DE  |
| EVM0000986 | LG6 | pentatricopeptide repeat-con  | not DE   | not DE   | not DE   | not DE  |
| EVM0007006 | LG6 | pentatricopeptide repeat-con  | not DE   | not DE   | not DE   | not DE  |
| EVM0018375 | LG6 | pentatricopeptide repeat-con  | not DE   | not DE   | not DE   | not DE  |
| EVM0005982 | LG6 | pentatricopeptide repeat-con  | not DE   | not DE   | not DE   | not DE  |
| EVM0017521 | LG6 | pentatricopeptide repeat-con  | -2.63327 | 6.52E-12 | -1.55787 | 0.00023 |
| EVM0014305 | LG6 | pentatricopeptide repeat-con  | not DE   | not DE   | not DE   | not DE  |
| EVM0014100 | LG6 | pentatricopeptide repeat-con  | not DE   | not DE   | not DE   | not DE  |
| EVM0007433 | LG6 | pentatricopeptide repeat-con  | not DE   | not DE   | not DE   | not DE  |
| EVM0023291 | LG6 | pentatricopeptide repeat-con  | not DE   | not DE   | not DE   | not DE  |
| EVM0019521 | LG6 | peptide chain release factor  | not DE   | not DE   | not DE   | not DE  |
| EVM0001277 | LG6 | peroxidase 44-like            | not DE   | not DE   | not DE   | not DE  |

|            |     |                               |          |          |          |        |
|------------|-----|-------------------------------|----------|----------|----------|--------|
| EVM0021209 | LG6 | peroxidase 44-like            | not DE   | not DE   | not DE   | not DE |
| EVM0012512 | LG6 | peroxidase 57-like            | not DE   | not DE   | not DE   | not DE |
| EVM0002512 | LG6 | peroxiredoxin-2B-like         | not DE   | not DE   | not DE   | not DE |
| EVM0012208 | LG6 | peroxisome biogenesis protein | not DE   | not DE   | not DE   | not DE |
| EVM0004613 | LG6 | peroxygenase-like             | not DE   | not DE   | not DE   | not DE |
| EVM0021682 | LG6 | phenylalanine ammonia-lyase   | not DE   | not DE   | not DE   | not DE |
| EVM0020685 | LG6 | phosphate transporter PHO1 h  | not DE   | not DE   | not DE   | not DE |
| EVM0008223 | LG6 | phosphoenolpyruvate carboxyl  | not DE   | not DE   | not DE   | not DE |
| EVM0014780 | LG6 | phosphoinositide 3-kinase re  | not DE   | not DE   | -1.19533 | #####  |
| EVM0004065 | LG6 | phospholipase A(1) LCAT3-lik  | not DE   | not DE   | not DE   | not DE |
| EVM0002752 | LG6 | pollen-specific leucine-rich  | not DE   | not DE   | not DE   | not DE |
| EVM0010588 | LG6 | pollen-specific leucine-rich  | not DE   | not DE   | not DE   | not DE |
| EVM0006592 | LG6 | pollen-specific protein SF21  | not DE   | not DE   | not DE   | not DE |
| EVM0010842 | LG6 | poly(rC)-binding protein 3-l  | not DE   | not DE   | not DE   | not DE |
| EVM0000650 | LG6 | polyadenylate-binding protei  | not DE   | not DE   | not DE   | not DE |
| EVM0012506 | LG6 | polyribonucleotide nucleotid  | not DE   | not DE   | not DE   | not DE |
| EVM0017937 | LG6 | polyribonucleotide nucleotid  | not DE   | not DE   | not DE   | not DE |
| EVM0023996 | LG6 | polyribonucleotide nucleotid  | not DE   | not DE   | not DE   | not DE |
| EVM0013245 | LG6 | probable ADP-ribosylation fa  | not DE   | not DE   | not DE   | not DE |
| EVM0017245 | LG6 | probable ADP-ribosylation fa  | not DE   | not DE   | not DE   | not DE |
| EVM0003164 | LG6 | probable E3 ubiquitin-protei  | not DE   | not DE   | not DE   | not DE |
| EVM0012110 | LG6 | probable LRR receptor-like s  | not DE   | not DE   | not DE   | not DE |
| EVM0016443 | LG6 | probable LRR receptor-like s  | not DE   | not DE   | not DE   | not DE |
| EVM0004085 | LG6 | probable LRR receptor-like s  | not DE   | not DE   | not DE   | not DE |
| EVM0008947 | LG6 | probable LRR receptor-like s  | not DE   | not DE   | not DE   | not DE |
| EVM0000543 | LG6 | probable LRR receptor-like s  | not DE   | not DE   | not DE   | not DE |
| EVM0012896 | LG6 | probable LRR receptor-like s  | not DE   | not DE   | not DE   | not DE |
| EVM0005336 | LG6 | probable LRR receptor-like s  | not DE   | not DE   | not DE   | not DE |
| EVM0016822 | LG6 | probable LRR receptor-like s  | not DE   | not DE   | not DE   | not DE |
| EVM0010886 | LG6 | probable RNA helicase SDE3-l  | not DE   | not DE   | not DE   | not DE |
| EVM0009053 | LG6 | probable U6 snRNA-associated  | not DE   | not DE   | not DE   | not DE |
| EVM0009790 | LG6 | probable WRKY transcription   | not DE   | not DE   | not DE   | not DE |
| EVM0003518 | LG6 | probable coffeoyl-CoA 0-meth  | not DE   | not DE   | not DE   | not DE |
| EVM0010401 | LG6 | probable cation transporter   | not DE   | not DE   | not DE   | not DE |
| EVM0007084 | LG6 | probable clathrin assembly p  | not DE   | not DE   | not DE   | not DE |
| EVM0017872 | LG6 | probable galactinol--sucrose  | not DE   | not DE   | not DE   | not DE |
| EVM0006723 | LG6 | probable galacturonosyltrans  | not DE   | not DE   | not DE   | not DE |
| EVM0003581 | LG6 | probable glucuronosyltransfe  | not DE   | not DE   | not DE   | not DE |
| EVM0001831 | LG6 | probable glycosyltransferase  | not DE   | not DE   | not DE   | not DE |
| EVM0014247 | LG6 | probable glycosyltransferase  | not DE   | not DE   | not DE   | not DE |
| EVM0019657 | LG6 | probable histone H2A variant  | not DE   | not DE   | not DE   | not DE |
| EVM0010758 | LG6 | probable inactive receptor k  | not DE   | not DE   | not DE   | not DE |
| EVM0022310 | LG6 | probable inositol oxygenase   | not DE   | not DE   | not DE   | not DE |
| EVM0024095 | LG6 | probable lactoylglutathione   | not DE   | not DE   | not DE   | not DE |
| EVM0023418 | LG6 | probable leucine-rich repeat  | not DE   | not DE   | not DE   | not DE |
| EVM0017394 | LG6 | probable leucine-rich repeat  | not DE   | not DE   | not DE   | not DE |
| EVM0022485 | LG6 | probable leucine-rich repeat  | not DE   | not DE   | not DE   | not DE |
| EVM0018598 | LG6 | probable long-chain-alcohol   | not DE   | not DE   | not DE   | not DE |
| EVM0002549 | LG6 | probable low-specificity L-t  | 1.817066 | 0.020014 | not DE   | not DE |
| EVM0004336 | LG6 | probable pectinesterase 53-l  | not DE   | not DE   | not DE   | not DE |
| EVM0004272 | LG6 | probable phospholipase A2 ho  | not DE   | not DE   | not DE   | not DE |
| EVM0005475 | LG6 | probable receptor-like prote  | -3.39949 | 0.02994  | not DE   | not DE |
| EVM0005169 | LG6 | probable serine/threonine pr  | not DE   | not DE   | not DE   | not DE |
| EVM0007696 | LG6 | probable serine/threonine-pr  | not DE   | not DE   | not DE   | not DE |

|            |     |                                       |          |          |          |         |
|------------|-----|---------------------------------------|----------|----------|----------|---------|
| EVM0007292 | LG6 | probable tyrosine-protein phosphatase | not DE   | not DE   | not DE   | not DE  |
| EVM0015444 | LG6 | profilin-like                         | not DE   | not DE   | not DE   | not DE  |
| EVM0024018 | LG6 | proline-rich receptor-like protein    | not DE   | not DE   | not DE   | not DE  |
| EVM0017785 | LG6 | protein ENDOSPERM DEFECTIVE 1         | not DE   | not DE   | not DE   | not DE  |
| EVM0002650 | LG6 | protein HASTY 1-like isoform X1       | not DE   | not DE   | -1.05699 | 0.00069 |
| EVM0014556 | LG6 | protein LIGHT-DEPENDENT SHOOTING      | not DE   | not DE   | not DE   | not DE  |
| EVM0010692 | LG6 | protein NRT1/ PTR FAMILY 4.5          | not DE   | not DE   | not DE   | not DE  |
| EVM0004696 | LG6 | protein PIR-like                      | not DE   | not DE   | not DE   | not DE  |
| EVM0020659 | LG6 | protein PNS1-like                     | not DE   | not DE   | not DE   | not DE  |
| EVM0003538 | LG6 | protein TOPLESS-like isoform X1       | not DE   | not DE   | not DE   | not DE  |
| EVM0019976 | LG6 | protein TRANSPARENT TESTA 12          | not DE   | not DE   | not DE   | not DE  |
| EVM0021844 | LG6 | protein YIPF6 homolog                 | not DE   | not DE   | not DE   | not DE  |
| EVM0002973 | LG6 | protein YLS2-like                     | not DE   | not DE   | not DE   | not DE  |
| EVM0006752 | LG6 | protein bem46-like isoform X1         | not DE   | not DE   | not DE   | not DE  |
| EVM0014795 | LG6 | protein kinase G11A-like              | not DE   | not DE   | not DE   | not DE  |
| EVM0021102 | LG6 | protein notum homolog                 | not DE   | not DE   | not DE   | not DE  |
| EVM0022680 | LG6 | protein pelota-like                   | not DE   | not DE   | not DE   | not DE  |
| EVM0016542 | LG6 | protein phosphatase 2C 16-like        | 2.857513 | 0.001136 | not DE   | not DE  |
| EVM0007072 | LG6 | protein prenyltransferase alpha       | not DE   | not DE   | not DE   | not DE  |
| EVM0020266 | LG6 | protein transport protein Sec14       | not DE   | not DE   | -1.3412  | #####   |
| EVM0013866 | LG6 | protein trichome birefringence        | not DE   | not DE   | 3.929289 | #####   |
| EVM0018232 | LG6 | pumilio homolog 12-like               | not DE   | not DE   | not DE   | not DE  |
| EVM0016062 | LG6 | putative ABC transporter B family     | not DE   | not DE   | not DE   | not DE  |
| EVM0015242 | LG6 | putative H/ACA ribonucleoprotein      | not DE   | not DE   | not DE   | not DE  |
| EVM0021188 | LG6 | putative acyl-activating enzyme       | not DE   | not DE   | not DE   | not DE  |
| EVM0000608 | LG6 | putative auxin efflux carrier         | not DE   | not DE   | not DE   | not DE  |
| EVM0023306 | LG6 | putative dual specificity protein     | not DE   | not DE   | not DE   | not DE  |
| EVM0011852 | LG6 | putative glucan endo-1,3-beta         | not DE   | not DE   | not DE   | not DE  |
| EVM0020533 | LG6 | putative glucose-6-phosphate          | not DE   | not DE   | not DE   | not DE  |
| EVM0016415 | LG6 | putative glucuronosyltransferase      | not DE   | not DE   | not DE   | not DE  |
| EVM0016810 | LG6 | putative leucine-rich repeat          | not DE   | not DE   | not DE   | not DE  |
| EVM0016437 | LG6 | putative pentatricopeptide repeat     | not DE   | not DE   | not DE   | not DE  |
| EVM0001245 | LG6 | putative receptor-like protein        | not DE   | not DE   | not DE   | not DE  |
| EVM0002236 | LG6 | pyruvate kinase, cytosolic isoform    | not DE   | not DE   | 1.204857 | 0.03538 |
| EVM0016545 | LG6 | rac-like GTP-binding protein          | not DE   | not DE   | not DE   | not DE  |
| EVM0021508 | LG6 | ras-related protein RABBLc            | not DE   | not DE   | not DE   | not DE  |
| EVM0022417 | LG6 | receptor-like cytosolic serine        | not DE   | not DE   | not DE   | not DE  |
| EVM0019250 | LG6 | receptor-like protein kinase          | not DE   | not DE   | not DE   | not DE  |
| EVM0004945 | LG6 | receptor-like serine/threonine        | not DE   | not DE   | not DE   | not DE  |
| EVM0023442 | LG6 | rho guanine nucleotide exchange       | not DE   | not DE   | not DE   | not DE  |
| EVM0000192 | LG6 | serine carboxypeptidase-like          | not DE   | not DE   | not DE   | not DE  |
| EVM0007341 | LG6 | serine carboxypeptidase-like          | not DE   | not DE   | not DE   | not DE  |
| EVM0007631 | LG6 | serine carboxypeptidase-like          | not DE   | not DE   | not DE   | not DE  |
| EVM0001409 | LG6 | serine/arginine repetitive motif      | not DE   | not DE   | not DE   | not DE  |
| EVM0005086 | LG6 | serine/threonine-protein kinase       | not DE   | not DE   | not DE   | not DE  |
| EVM0012813 | LG6 | serine/threonine-protein kinase       | not DE   | not DE   | not DE   | not DE  |
| EVM0013619 | LG6 | serine/threonine-protein kinase       | not DE   | not DE   | not DE   | not DE  |
| EVM0021915 | LG6 | serine/threonine-protein kinase       | not DE   | not DE   | not DE   | not DE  |
| EVM0014703 | LG6 | serine/threonine-protein kinase       | not DE   | not DE   | not DE   | not DE  |
| EVM0006764 | LG6 | shaggy-related protein kinase         | not DE   | not DE   | not DE   | not DE  |
| EVM0009218 | LG6 | signal peptidase complex catalytic    | not DE   | not DE   | not DE   | not DE  |
| EVM0004190 | LG6 | sister chromatid cohesion protein     | not DE   | not DE   | not DE   | not DE  |
| EVM0002617 | LG6 | snRNA-activating protein complex      | not DE   | not DE   | not DE   | not DE  |
| EVM0001600 | LG6 | sodium/hydrogen exchanger 1           | not DE   | not DE   | not DE   | not DE  |

|            |     |                                              |          |          |          |         |
|------------|-----|----------------------------------------------|----------|----------|----------|---------|
| EVM0004482 | LG6 | sodium/hydrogen exchanger 6-                 | not DE   | not DE   | not DE   | not DE  |
| EVM0006942 | LG6 | sodium/pyruvate cotransporter                | not DE   | not DE   | not DE   | not DE  |
| EVM0013465 | LG6 | stellacyanin-like                            | not DE   | not DE   | not DE   | not DE  |
| EVM0005892 | LG6 | sterol 3-beta-glucosyltransferase            | not DE   | not DE   | not DE   | not DE  |
| EVM0014681 | LG6 | sugar transporter ERD6-like                  | not DE   | not DE   | not DE   | not DE  |
| EVM0010807 | LG6 | syntaxin-22-like isoform X1                  | not DE   | not DE   | not DE   | not DE  |
| EVM0014611 | LG6 | tRNA (guanine(9)-N1)-methyltransferase       | not DE   | not DE   | not DE   | not DE  |
| EVM0004376 | LG6 | tRNA (guanine-N(7)-)-methyltransferase       | not DE   | not DE   | not DE   | not DE  |
| EVM0023534 | LG6 | tRNA A64-2'-O-ribosylphosphorylase           | not DE   | not DE   | not DE   | not DE  |
| EVM0006623 | LG6 | thylakoid lumenal 16.5 kDa protein           | not DE   | not DE   | not DE   | not DE  |
| EVM0002292 | LG6 | transcription factor DIVARICATA              | not DE   | not DE   | not DE   | not DE  |
| EVM0015472 | LG6 | transcription factor MYB82-1                 | not DE   | not DE   | not DE   | not DE  |
| EVM0024336 | LG6 | transcription factor MYB86-1                 | not DE   | not DE   | not DE   | not DE  |
| EVM0020520 | LG6 | transcription factor bHLH68                  | not DE   | not DE   | not DE   | not DE  |
| EVM0017567 | LG6 | transcription initiation factor              | not DE   | not DE   | not DE   | not DE  |
| EVM0004079 | LG6 | transcriptional adapter ADA2                 | not DE   | not DE   | not DE   | not DE  |
| EVM0004674 | LG6 | transcriptional adapter ADA2                 | not DE   | not DE   | not DE   | not DE  |
| EVM0009159 | LG6 | transcriptional adapter ADA2                 | not DE   | not DE   | not DE   | not DE  |
| EVM0006132 | LG6 | translation initiation factor -1.33389       | 0.005749 | not DE   | not DE   | not DE  |
| EVM0004069 | LG6 | translation initiation factor                | not DE   | not DE   | not DE   | not DE  |
| EVM0017884 | LG6 | transmembrane protein 184C-1                 | not DE   | not DE   | not DE   | not DE  |
| EVM0001355 | LG6 | tubulin alpha-3 chain                        | not DE   | not DE   | not DE   | not DE  |
| EVM0009376 | LG6 | two pore potassium channel alpha             | not DE   | not DE   | not DE   | not DE  |
| EVM0017951 | LG6 | uncharacterized RNA-binding protein          | not DE   | not DE   | not DE   | not DE  |
| EVM0018452 | LG6 | uncharacterized WD repeat-containing protein | not DE   | not DE   | not DE   | not DE  |
| EVM0000814 | LG6 | uncharacterized protein At2g                 | not DE   | not DE   | not DE   | not DE  |
| EVM0009303 | LG6 | uncharacterized protein At3g                 | not DE   | not DE   | not DE   | not DE  |
| EVM0017618 | LG6 | uncharacterized protein At4g                 | not DE   | not DE   | not DE   | not DE  |
| EVM0006865 | LG6 | uncharacterized protein At5g                 | not DE   | not DE   | not DE   | not DE  |
| EVM0001931 | LG6 | uncharacterized protein LOC1                 | -2.92369 | 0.040409 | not DE   | not DE  |
| EVM0005764 | LG6 | uncharacterized protein LOC1                 | not DE   | not DE   | not DE   | not DE  |
| EVM0015774 | LG6 | uncharacterized protein LOC1                 | not DE   | not DE   | not DE   | not DE  |
| EVM0010179 | LG6 | uncharacterized protein LOC1                 | not DE   | not DE   | not DE   | not DE  |
| EVM0017934 | LG6 | uncharacterized protein LOC1                 | not DE   | not DE   | -4.80311 | #####   |
| EVM0004737 | LG6 | uncharacterized protein LOC1                 | not DE   | not DE   | not DE   | not DE  |
| EVM0006482 | LG6 | uncharacterized protein LOC1                 | not DE   | not DE   | not DE   | not DE  |
| EVM0019395 | LG6 | uncharacterized protein LOC1                 | not DE   | not DE   | not DE   | not DE  |
| EVM0023813 | LG6 | uncharacterized protein LOC1                 | not DE   | not DE   | not DE   | not DE  |
| EVM0001167 | LG6 | uncharacterized protein LOC1                 | not DE   | not DE   | not DE   | not DE  |
| EVM0004642 | LG6 | uncharacterized protein LOC1                 | not DE   | not DE   | not DE   | not DE  |
| EVM0023471 | LG6 | uncharacterized protein LOC1                 | not DE   | not DE   | 1.009059 | 0.03492 |
| EVM0015267 | LG6 | uncharacterized protein LOC1                 | not DE   | not DE   | not DE   | not DE  |
| EVM0017195 | LG6 | uncharacterized protein LOC1                 | not DE   | not DE   | not DE   | not DE  |
| EVM0016090 | LG6 | uncharacterized protein LOC1                 | not DE   | not DE   | not DE   | not DE  |
| EVM0012843 | LG6 | uncharacterized protein LOC1                 | not DE   | not DE   | not DE   | not DE  |
| EVM0020661 | LG6 | uncharacterized protein LOC1                 | not DE   | not DE   | not DE   | not DE  |
| EVM0021591 | LG6 | uncharacterized protein LOC1                 | not DE   | not DE   | not DE   | not DE  |
| EVM0008920 | LG6 | uncharacterized protein LOC1                 | not DE   | not DE   | -1.28957 | #####   |
| EVM0006940 | LG6 | uncharacterized protein LOC1                 | not DE   | not DE   | not DE   | not DE  |
| EVM0004685 | LG6 | uncharacterized protein LOC1                 | not DE   | not DE   | not DE   | not DE  |
| EVM0006518 | LG6 | uncharacterized protein LOC1                 | not DE   | not DE   | not DE   | not DE  |
| EVM0001422 | LG6 | uncharacterized protein LOC1                 | not DE   | not DE   | not DE   | not DE  |
| EVM0021869 | LG6 | uncharacterized protein LOC1                 | not DE   | not DE   | not DE   | not DE  |
| EVM0009649 | LG6 | uncharacterized protein LOC1                 | not DE   | not DE   | not DE   | not DE  |

|            |     |                              |        |        |          |         |
|------------|-----|------------------------------|--------|--------|----------|---------|
| EVM0022761 | LG6 | uncharacterized protein LOC1 | not DE | not DE | not DE   | not DE  |
| EVM0007237 | LG6 | uncharacterized protein LOC1 | not DE | not DE | not DE   | not DE  |
| EVM0012576 | LG6 | uncharacterized protein LOC1 | not DE | not DE | not DE   | not DE  |
| EVM0004981 | LG6 | uncharacterized protein LOC1 | not DE | not DE | not DE   | not DE  |
| EVM0023168 | LG6 | uncharacterized protein LOC1 | not DE | not DE | not DE   | not DE  |
| EVM0016517 | LG6 | uncharacterized protein LOC1 | not DE | not DE | not DE   | not DE  |
| EVM0015129 | LG6 | uncharacterized protein LOC1 | not DE | not DE | not DE   | not DE  |
| EVM0007280 | LG6 | uncharacterized protein LOC1 | not DE | not DE | not DE   | not DE  |
| EVM0021584 | LG6 | uncharacterized protein LOC1 | not DE | not DE | not DE   | not DE  |
| EVM0012021 | LG6 | uncharacterized protein LOC1 | not DE | not DE | not DE   | not DE  |
| EVM0008494 | LG6 | uncharacterized protein LOC1 | not DE | not DE | not DE   | not DE  |
| EVM0002818 | LG6 | uncharacterized protein LOC1 | not DE | not DE | not DE   | not DE  |
| EVM0008001 | LG6 | uncharacterized protein LOC1 | not DE | not DE | not DE   | not DE  |
| EVM0004705 | LG6 | uncharacterized protein LOC1 | not DE | not DE | not DE   | not DE  |
| EVM0013988 | LG6 | uncharacterized protein LOC1 | not DE | not DE | not DE   | not DE  |
| EVM0004899 | LG6 | uncharacterized protein LOC1 | not DE | not DE | not DE   | not DE  |
| EVM0004031 | LG6 | uncharacterized protein LOC1 | not DE | not DE | -1.09377 | #####   |
| EVM0008881 | LG6 | uncharacterized protein LOC1 | not DE | not DE | -2.66916 | 0.00011 |
| EVM0005152 | LG6 | uncharacterized protein LOC1 | not DE | not DE | not DE   | not DE  |
| EVM0022403 | LG6 | uncharacterized protein LOC1 | not DE | not DE | not DE   | not DE  |
| EVM0012390 | LG6 | uncharacterized protein LOC1 | not DE | not DE | not DE   | not DE  |
| EVM0019166 | LG6 | uncharacterized protein LOC1 | not DE | not DE | not DE   | not DE  |
| EVM0023706 | LG6 | uncharacterized protein LOC1 | not DE | not DE | not DE   | not DE  |
| EVM0002601 | LG6 | uncharacterized protein LOC1 | not DE | not DE | not DE   | not DE  |
| EVM0012546 | LG6 | uncharacterized protein LOC1 | not DE | not DE | not DE   | not DE  |
| EVM0014667 | LG6 | uncharacterized protein LOC1 | not DE | not DE | not DE   | not DE  |
| EVM0009767 | LG6 | uncharacterized protein LOC1 | not DE | not DE | not DE   | not DE  |
| EVM0012096 | LG6 | uncharacterized protein LOC1 | not DE | not DE | not DE   | not DE  |
| EVM0012065 | LG6 | uncharacterized protein LOC1 | not DE | not DE | not DE   | not DE  |
| EVM0014158 | LG6 | uncharacterized protein LOC1 | not DE | not DE | not DE   | not DE  |
| EVM0002336 | LG6 | uncharacterized protein LOC1 | not DE | not DE | 1.102747 | 0.00142 |
| EVM0023536 | LG6 | uncharacterized protein LOC1 | not DE | not DE | not DE   | not DE  |
| EVM0008274 | LG6 | uncharacterized protein LOC1 | not DE | not DE | not DE   | not DE  |
| EVM0023170 | LG6 | uncharacterized protein LOC1 | not DE | not DE | not DE   | not DE  |
| EVM0007791 | LG6 | uncharacterized protein LOC1 | not DE | not DE | not DE   | not DE  |
| EVM0011356 | LG6 | uncharacterized protein LOC1 | not DE | not DE | not DE   | not DE  |
| EVM0023622 | LG6 | uncharacterized protein LOC1 | not DE | not DE | not DE   | not DE  |
| EVM0008913 | LG6 | uncharacterized protein LOC1 | not DE | not DE | not DE   | not DE  |
| EVM0005733 | LG6 | uncharacterized protein LOC1 | not DE | not DE | not DE   | not DE  |
| EVM0007386 | LG6 | uncharacterized protein LOC1 | not DE | not DE | not DE   | not DE  |
| EVM0008263 | LG6 | uncharacterized protein LOC1 | not DE | not DE | not DE   | not DE  |
| EVM0000632 | LG6 | uncharacterized protein LOC1 | not DE | not DE | not DE   | not DE  |
| EVM0001187 | LG6 | uncharacterized protein LOC1 | not DE | not DE | not DE   | not DE  |
| EVM0020798 | LG6 | uncharacterized protein LOC1 | not DE | not DE | not DE   | not DE  |
| EVM0012559 | LG6 | uncharacterized protein LOC1 | not DE | not DE | not DE   | not DE  |
| EVM0005057 | LG6 | uncharacterized protein LOC1 | not DE | not DE | not DE   | not DE  |
| EVM0005776 | LG6 | uncharacterized protein LOC1 | not DE | not DE | 1.130024 | 0.00032 |
| EVM0020502 | LG6 | uncharacterized protein LOC1 | not DE | not DE | not DE   | not DE  |
| EVM0007155 | LG6 | uncharacterized protein LOC1 | not DE | not DE | not DE   | not DE  |
| EVM0001320 | LG6 | uncharacterized protein LOC1 | not DE | not DE | not DE   | not DE  |
| EVM0021691 | LG6 | uncharacterized protein LOC1 | not DE | not DE | not DE   | not DE  |
| EVM0007451 | LG6 | uncharacterized protein LOC1 | not DE | not DE | not DE   | not DE  |
| EVM0008250 | LG6 | uncharacterized protein LOC1 | not DE | not DE | not DE   | not DE  |
| EVM0010295 | LG6 | uncharacterized protein LOC1 | not DE | not DE | not DE   | not DE  |

|            |     |                               |          |          |          |         |
|------------|-----|-------------------------------|----------|----------|----------|---------|
| EVM0019299 | LG6 | uncharacterized protein LOC1  | not DE   | not DE   | not DE   | not DE  |
| EVM0012740 | LG6 | uncharacterized protein LOC1  | not DE   | not DE   | not DE   | not DE  |
| EVM0003478 | LG6 | uncharacterized protein LOC1  | not DE   | not DE   | not DE   | not DE  |
| EVM0011615 | LG6 | uncharacterized protein LOC1  | not DE   | not DE   | not DE   | not DE  |
| EVM0009999 | LG6 | uncharacterized protein LOC1  | not DE   | not DE   | not DE   | not DE  |
| EVM0018846 | LG6 | uncharacterized protein LOC1  | not DE   | not DE   | not DE   | not DE  |
| EVM0003429 | LG6 | uncharacterized protein LOC1  | not DE   | not DE   | not DE   | not DE  |
| EVM0009762 | LG6 | uncharacterized protein LOC1  | not DE   | not DE   | not DE   | not DE  |
| EVM0021836 | LG6 | uncharacterized protein LOC1  | not DE   | not DE   | not DE   | not DE  |
| EVM0004004 | LG6 | uncharacterized protein LOC1  | not DE   | not DE   | not DE   | not DE  |
| EVM0018470 | LG6 | uncharacterized protein LOC1  | not DE   | not DE   | not DE   | not DE  |
| EVM0011019 | LG6 | uncharacterized protein LOC1  | not DE   | not DE   | not DE   | not DE  |
| EVM0001939 | LG6 | uncharacterized protein LOC1  | not DE   | not DE   | not DE   | not DE  |
| EVM0018960 | LG6 | uncharacterized protein LOC1  | not DE   | not DE   | not DE   | not DE  |
| EVM0015486 | LG6 | uncharacterized protein LOC1  | not DE   | not DE   | not DE   | not DE  |
| EVM0008806 | LG6 | uncharacterized protein LOC1  | not DE   | not DE   | not DE   | not DE  |
| EVM0019479 | LG6 | uncharacterized protein LOC1  | 1.082819 | 0.009168 | not DE   | not DE  |
| EVM0013504 | LG6 | uncharacterized protein LOC1  | not DE   | not DE   | not DE   | not DE  |
| EVM0015719 | LG6 | uncharacterized protein LOC1  | not DE   | not DE   | not DE   | not DE  |
| EVM0004040 | LG6 | uncharacterized protein LOC1  | not DE   | not DE   | not DE   | not DE  |
| EVM0001784 | LG6 | uncharacterized protein LOC1  | not DE   | not DE   | not DE   | not DE  |
| EVM0009972 | LG6 | uncharacterized protein LOC1  | not DE   | not DE   | not DE   | not DE  |
| EVM0017259 | LG6 | uncharacterized protein LOC1  | not DE   | not DE   | not DE   | not DE  |
| EVM0004035 | LG6 | uncharacterized protein LOC1  | not DE   | not DE   | 1.349153 | 0.00199 |
| EVM0008867 | LG6 | uncharacterized protein LOC1  | not DE   | not DE   | not DE   | not DE  |
| EVM0002941 | LG6 | uncharacterized protein LOC1  | not DE   | not DE   | not DE   | not DE  |
| EVM0012538 | LG6 | uncharacterized protein LOC1  | not DE   | not DE   | not DE   | not DE  |
| EVM0020906 | LG6 | uncharacterized protein LOC1  | 1.850405 | 1.61E-05 | not DE   | not DE  |
| EVM0001196 | LG6 | uncharacterized protein LOC1  | not DE   | not DE   | not DE   | not DE  |
| EVM0020814 | LG6 | uncharacterized protein LOC1  | not DE   | not DE   | not DE   | not DE  |
| EVM0024133 | LG6 | uncharacterized protein LOC1  | not DE   | not DE   | not DE   | not DE  |
| EVM0010215 | LG6 | vacuolar protein sorting-ass  | not DE   | not DE   | not DE   | not DE  |
| EVM0005265 | LG6 | vesicle transport protein SE  | not DE   | not DE   | -1.30754 | 0.00013 |
| EVM0018023 | LG6 | voltage-gated hydrogen chann  | not DE   | not DE   | not DE   | not DE  |
| EVM0009069 | LG6 | wall-associated receptor kin  | not DE   | not DE   | not DE   | not DE  |
| EVM0015395 | LG6 | wall-associated receptor kin  | not DE   | not DE   | not DE   | not DE  |
| EVM0019050 | LG6 | wall-associated receptor kin  | not DE   | not DE   | not DE   | not DE  |
| EVM0024248 | LG6 | wall-associated receptor kin  | not DE   | not DE   | not DE   | not DE  |
| EVM0003837 | LG6 | zinc finger CCCH domain-cont  | not DE   | not DE   | not DE   | not DE  |
| EVM0023029 | LG6 | zinc finger protein VAR3, ch  | not DE   | not DE   | not DE   | not DE  |
| EVM0011395 | LG6 | 4-coumarate:CoA ligase        | not DE   | not DE   | not DE   | not DE  |
| EVM0019469 | LG6 | 4-coumarate:CoA ligase        | not DE   | not DE   | not DE   | not DE  |
| EVM0003745 | LG6 | 4-coumarate:CoA ligase 3      | not DE   | not DE   | not DE   | not DE  |
| EVM0021918 | LG6 | 6-phosphofructokinase 3       | not DE   | not DE   | not DE   | not DE  |
| EVM0010273 | LG6 | ADP-ribosylation factor 2     | not DE   | not DE   | not DE   | not DE  |
| EVM0004392 | LG6 | ADP-ribosylation factor, arf, | not DE   | not DE   | not DE   | not DE  |
| EVM0011186 | LG6 | AIG2-like (avirulence induced | not DE   | not DE   | not DE   | not DE  |
| EVM0011190 | LG6 | AMP dependent ligase, putativ | not DE   | not DE   | not DE   | not DE  |
| EVM0021093 | LG6 | AP2-like ethylene-responsive  | not DE   | not DE   | not DE   | not DE  |
| EVM0019071 | LG6 | ATP synthase CF1 alpha chain  | -2.38196 | 0.018722 | not DE   | not DE  |
| EVM0014695 | LG6 | ATP synthase epsilon subunit  | not DE   | not DE   | 1.143391 | 0.00036 |
| EVM0000675 | LG6 | ATP synthase subunit d, putat | not DE   | not DE   | not DE   | not DE  |
| EVM0016179 | LG6 | ATPase family associated with | not DE   | not DE   | not DE   | not DE  |
| EVM0020171 | LG6 | ATPase family associated with | not DE   | not DE   | not DE   | not DE  |



|            |     |                                |          |          |         |         |
|------------|-----|--------------------------------|----------|----------|---------|---------|
| EVM0002397 | LG6 | Adenosine-5'-phosphosulf       | not DE   | not DE   | not DE  | not DE  |
| EVM0018923 | LG6 | Adenosine-5'-phosphosulf       | not DE   | not DE   | not DE  | not DE  |
| EVM0014890 | LG6 | Adipose-regulatory protein, p  | not DE   | not DE   | not DE  | not DE  |
| EVM0016238 | LG6 | Alpha/beta-Hydrolases superfam | not DE   | not DE   | not DE  | not DE  |
| EVM0014081 | LG6 | Ankyrin repeat family protein  | not DE   | not DE   | not DE  | not DE  |
| EVM0010222 | LG6 | Arabinogalactan protein 22, p  | not DE   | not DE   | not DE  | not DE  |
| EVM0016081 | LG6 | Auxin-responsive family prote  | not DE   | not DE   | not DE  | not DE  |
| EVM0019740 | LG6 | Axonemal dynein light chain,   | not DE   | not DE   | not DE  | not DE  |
| EVM0022860 | LG6 | Beta-1, 4-N-acetylglucosaminy  | not DE   | not DE   | not DE  | not DE  |
| EVM0019571 | LG6 | Beta-Amyrin Synthase isoform   | not DE   | not DE   | not DE  | not DE  |
| EVM0022552 | LG6 | Beta-galactosidase             | not DE   | not DE   | not DE  | not DE  |
| EVM0004611 | LG6 | Blue copper protein precursor  | 5.652773 | 0.001761 | not DE  | not DE  |
| EVM0008646 | LG6 | BnaA07g07540D                  | not DE   | not DE   | not DE  | not DE  |
| EVM0005271 | LG6 | CPI-4                          | not DE   | not DE   | not DE  | not DE  |
| EVM0014193 | LG6 | CPI-4                          | not DE   | not DE   | 1.43635 | 0.04016 |
| EVM0019140 | LG6 | Calcineurin B-like protein 3   | not DE   | not DE   | not DE  | not DE  |
| EVM0014719 | LG6 | Co-chaperone GrpE family prot  | not DE   | not DE   | not DE  | not DE  |
| EVM0023551 | LG6 | Copper binding protein 9, put  | not DE   | not DE   | not DE  | not DE  |
| EVM0022795 | LG6 | Copper transporter 5           | not DE   | not DE   | not DE  | not DE  |
| EVM0003105 | LG6 | Cysteine-rich receptor-like p  | not DE   | not DE   | not DE  | not DE  |
| EVM0010283 | LG6 | Cysteine-rich receptor-like p  | not DE   | not DE   | not DE  | not DE  |
| EVM0003739 | LG6 | Cytidine/deoxycytidylate deam  | not DE   | not DE   | not DE  | not DE  |
| EVM0016244 | LG6 | Cytochrome P450                | not DE   | not DE   | not DE  | not DE  |
| EVM0012565 | LG6 | Cytochrome P450 superfamily p  | not DE   | not DE   | not DE  | not DE  |
| EVM0004667 | LG6 | Cytochrome P450, putative      | not DE   | not DE   | not DE  | not DE  |
| EVM0002186 | LG6 | DENN domain-containing protei  | not DE   | not DE   | not DE  | not DE  |
| EVM0002788 | LG6 | DNA/RNA polymerases superfami  | not DE   | not DE   | not DE  | not DE  |
| EVM0004496 | LG6 | DREB2A-interacting 1-like pro  | not DE   | not DE   | not DE  | not DE  |
| EVM0021253 | LG6 | DREB2A-interacting 1-like pro  | not DE   | not DE   | not DE  | not DE  |
| EVM0003909 | LG6 | Double Clp-N motif-containing  | not DE   | not DE   | not DE  | not DE  |
| EVM0022214 | LG6 | Double Clp-N motif-containing  | not DE   | not DE   | not DE  | not DE  |
| EVM0015169 | LG6 | Duplicated homeodomain-like s  | not DE   | not DE   | not DE  | not DE  |
| EVM0004134 | LG6 | E3 ubiquitin-protein ligase A  | not DE   | not DE   | not DE  | not DE  |
| EVM0019470 | LG6 | EXORDIUM like 2, putative      | not DE   | not DE   | not DE  | not DE  |
| EVM0002963 | LG6 | Elf4-like 4 isoform 1          | not DE   | not DE   | not DE  | not DE  |
| EVM0022216 | LG6 | Enoyl-CoA hydratase/isomerase  | not DE   | not DE   | not DE  | not DE  |
| EVM0018410 | LG6 | Eukaryotic aspartyl protease   | not DE   | not DE   | not DE  | not DE  |
| EVM0000883 | LG6 | Eukaryotic translation initia  | not DE   | not DE   | not DE  | not DE  |
| EVM0009769 | LG6 | F1504.13                       | not DE   | not DE   | not DE  | not DE  |
| EVM0004826 | LG6 | FVE protein                    | not DE   | not DE   | not DE  | not DE  |
| EVM0000715 | LG6 | Far1-related sequence 10 isof  | not DE   | not DE   | not DE  | not DE  |
| EVM0010379 | LG6 | GATA transcription factor 9,   | not DE   | not DE   | not DE  | not DE  |
| EVM0008898 | LG6 | GDP-mannose 3,5-epimerase 1    | not DE   | not DE   | not DE  | not DE  |
| EVM0020718 | LG6 | GDSL-motif lipase 7            | not DE   | not DE   | not DE  | not DE  |
| EVM0015871 | LG6 | GHMYB10, putative              | not DE   | not DE   | not DE  | not DE  |
| EVM0016961 | LG6 | Gamma-tocopherol methyltransf  | not DE   | not DE   | not DE  | not DE  |
| EVM0002176 | LG6 | Germin-like protein 2          | not DE   | not DE   | not DE  | not DE  |
| EVM0003769 | LG6 | Germin-like protein 2          | not DE   | not DE   | not DE  | not DE  |
| EVM0006344 | LG6 | Germin-like protein 2          | not DE   | not DE   | not DE  | not DE  |
| EVM0016956 | LG6 | Germin-like protein 2          | not DE   | not DE   | not DE  | not DE  |
| EVM0021222 | LG6 | Germin-like protein subfamily  | not DE   | not DE   | not DE  | not DE  |
| EVM0017018 | LG6 | Gibberellin receptor GID1, pu  | not DE   | not DE   | not DE  | not DE  |
| EVM0023095 | LG6 | Gibberellin receptor GID1, pu  | not DE   | not DE   | not DE  | not DE  |
| EVM0006583 | LG6 | Glucan endo-1,3-beta-glucosid  | not DE   | not DE   | not DE  | not DE  |

|            |     |                               |          |          |          |         |
|------------|-----|-------------------------------|----------|----------|----------|---------|
| EVM0015106 | LG6 | Glutamine-fructose-6-phosphat | not DE   | not DE   | not DE   | not DE  |
| EVM0011265 | LG6 | Glycylpeptide N-tetradecanoyl | not DE   | not DE   | not DE   | not DE  |
| EVM0014424 | LG6 | Heat shock transcription fact | 2.165772 | 0.003268 | not DE   | not DE  |
| EVM0002222 | LG6 | Histidine-containing phosphot | not DE   | not DE   | not DE   | not DE  |
| EVM0003294 | LG6 | Hydrophobic protein RCI2B     | not DE   | not DE   | 2.664249 | #####   |
| EVM0008041 | LG6 | Hydroxyproline-rich glycoprot | not DE   | not DE   | not DE   | not DE  |
| EVM0003723 | LG6 | Hyoscyamine 6-dioxygenase, pu | not DE   | not DE   | not DE   | not DE  |
| EVM0019748 | LG6 | Indeterminate(ID)-domain 7, p | not DE   | not DE   | not DE   | not DE  |
| EVM0024167 | LG6 | Indoleacetic acid-induced pro | not DE   | not DE   | not DE   | not DE  |
| EVM0023444 | LG6 | Integral membrane protein-lik | not DE   | not DE   | not DE   | not DE  |
| EVM0020978 | LG6 | Integrase-type DNA-binding su | not DE   | not DE   | not DE   | not DE  |
| EVM0016101 | LG6 | Iq-domain 31                  | not DE   | not DE   | not DE   | not DE  |
| EVM0020940 | LG6 | Leucine-rich repeat family pr | not DE   | not DE   | not DE   | not DE  |
| EVM0022233 | LG6 | MAP kinase kinase 6 isoform l | not DE   | not DE   | not DE   | not DE  |
| EVM0001746 | LG6 | Macrophage migration inhibito | not DE   | not DE   | 2.367053 | 0.02424 |
| EVM0024596 | LG6 | Macrophage migration inhibito | not DE   | not DE   | not DE   | not DE  |
| EVM0010789 | LG6 | Major facilitator superfamily | not DE   | not DE   | not DE   | not DE  |
| EVM0016248 | LG6 | Major facilitator superfamily | not DE   | not DE   | not DE   | not DE  |
| EVM0019636 | LG6 | Major facilitator superfamily | not DE   | not DE   | not DE   | not DE  |
| EVM0006098 | LG6 | Major facilitator superfamily | not DE   | not DE   | not DE   | not DE  |
| EVM0018067 | LG6 | Major facilitator superfamily | not DE   | not DE   | not DE   | not DE  |
| EVM0018920 | LG6 | Major facilitator superfamily | not DE   | not DE   | not DE   | not DE  |
| EVM0023081 | LG6 | Major facilitator superfamily | not DE   | not DE   | not DE   | not DE  |
| EVM0023467 | LG6 | Major facilitator superfamily | not DE   | not DE   | not DE   | not DE  |
| EVM0000195 | LG6 | Mechanosensitive channel of s | not DE   | not DE   | not DE   | not DE  |
| EVM0024616 | LG6 | Metaxin-related isoform 1     | not DE   | not DE   | not DE   | not DE  |
| EVM0015533 | LG6 | Mitochondrial Rho GTPase isof | not DE   | not DE   | not DE   | not DE  |
| EVM0002271 | LG6 | Mo25 family protein           | not DE   | not DE   | not DE   | not DE  |
| EVM0023302 | LG6 | Mo25 family protein           | not DE   | not DE   | not DE   | not DE  |
| EVM0014941 | LG6 | MuDR family transposase isof  | not DE   | not DE   | not DE   | not DE  |
| EVM0008921 | LG6 | Multidrug resistance pump, pu | not DE   | not DE   | not DE   | not DE  |
| EVM0017427 | LG6 | Multidrug resistance pump, pu | 2.324078 | 0.006715 | not DE   | not DE  |
| EVM0009722 | LG6 | Myb domain protein 113, putat | not DE   | not DE   | not DE   | not DE  |
| EVM0016752 | LG6 | Myb domain protein 5, putativ | not DE   | not DE   | not DE   | not DE  |
| EVM0009088 | LG6 | Myb-like transcription factor | not DE   | not DE   | not DE   | not DE  |
| EVM0000557 | LG6 | NAD(P)-linked oxidoreductase  | not DE   | not DE   | not DE   | not DE  |
| EVM0019441 | LG6 | NADH-plastoquinone oxidoreduc | not DE   | not DE   | not DE   | not DE  |
| EVM0020406 | LG6 | NADH-ubiquinone oxidoreductas | not DE   | not DE   | 1.010529 | #####   |
| EVM0004384 | LG6 | NADH:cytochrome B5 reductase  | not DE   | not DE   | not DE   | not DE  |
| EVM0018330 | LG6 | NADPH:cytochrome P450 reducta | not DE   | not DE   | not DE   | not DE  |
| EVM0016759 | LG6 | Na/H antiporter               | not DE   | not DE   | not DE   | not DE  |
| EVM0016665 | LG6 | Nuclear transcription factor  | not DE   | not DE   | not DE   | not DE  |
| EVM0002715 | LG6 | Nucleotide/sugar transporter  | not DE   | not DE   | not DE   | not DE  |
| EVM0016845 | LG6 | Oligopeptide transporter 3-l  | not DE   | not DE   | not DE   | not DE  |
| EVM0005974 | LG6 | Ovate family protein 8, putat | not DE   | not DE   | not DE   | not DE  |
| EVM0015319 | LG6 | P-loop containing nucleoside  | not DE   | not DE   | not DE   | not DE  |
| EVM0016285 | LG6 | P-loop containing nucleoside  | not DE   | not DE   | not DE   | not DE  |
| EVM0001001 | LG6 | Pantothenate kinase           | not DE   | not DE   | not DE   | not DE  |
| EVM0017857 | LG6 | Pentatricopeptide repeat supe | not DE   | not DE   | not DE   | not DE  |
| EVM0006226 | LG6 | Pentatricopeptide repeat supe | 1.605754 | 0.020616 | not DE   | not DE  |
| EVM0004096 | LG6 | Pentatricopeptide repeat-cont | not DE   | not DE   | not DE   | not DE  |
| EVM0006744 | LG6 | Pentatricopeptide repeat-cont | not DE   | not DE   | not DE   | not DE  |
| EVM0021620 | LG6 | Pentatricopeptide repeat-cont | not DE   | not DE   | not DE   | not DE  |
| EVM0005672 | LG6 | Phospholipid:diacylglycerol a | not DE   | not DE   | not DE   | not DE  |

|            |     |                                |          |          |          |        |
|------------|-----|--------------------------------|----------|----------|----------|--------|
| EVM0013744 | LG6 | Plant intracellular ras group  | not DE   | not DE   | not DE   | not DE |
| EVM0000719 | LG6 | Pleiotropic drug resistance 9  | not DE   | not DE   | not DE   | not DE |
| EVM0017387 | LG6 | Polyol transporter 5 -like pr  | not DE   | not DE   | not DE   | not DE |
| EVM0002570 | LG6 | Potassium channel tetramerisa  | not DE   | not DE   | not DE   | not DE |
| EVM0002797 | LG6 | Potassium channel tetramerisa  | not DE   | not DE   | not DE   | not DE |
| EVM0023041 | LG6 | Pre-mRNA cleavage complex 2 P  | not DE   | not DE   | not DE   | not DE |
| EVM0021628 | LG6 | Prefoldin subunit, putative    | not DE   | not DE   | not DE   | not DE |
| EVM0003988 | LG6 | Prenyltransferase superfam     | not DE   | not DE   | not DE   | not DE |
| EVM0002647 | LG6 | Profilin-1                     | not DE   | not DE   | not DE   | not DE |
| EVM0001428 | LG6 | PsbD mRNA maturation factor N  | not DE   | not DE   | not DE   | not DE |
| EVM0005263 | LG6 | RAB GTPase G3D                 | not DE   | not DE   | not DE   | not DE |
| EVM0005463 | LG6 | RNA-binding family protein is  | not DE   | not DE   | not DE   | not DE |
| EVM0024113 | LG6 | RecName: Full=Premnaspirodi    | not DE   | not DE   | not DE   | not DE |
| EVM0011003 | LG6 | Receptor like protein kinase   | not DE   | not DE   | not DE   | not DE |
| EVM0016906 | LG6 | Receptor like protein kinase   | not DE   | not DE   | not DE   | not DE |
| EVM0017930 | LG6 | Replicase polyprotein lab      | not DE   | not DE   | not DE   | not DE |
| EVM0018902 | LG6 | Rhicadhesin receptor precursor | not DE   | not DE   | not DE   | not DE |
| EVM0015236 | LG6 | Ribosomal L28e protein family  | not DE   | not DE   | not DE   | not DE |
| EVM0014360 | LG6 | Ribosomal protein L18e/L15 su  | not DE   | not DE   | not DE   | not DE |
| EVM0003057 | LG6 | Ribosomal protein S15A E       | not DE   | not DE   | not DE   | not DE |
| EVM0016916 | LG6 | Ribosomal protein S3Ae         | not DE   | not DE   | not DE   | not DE |
| EVM0020508 | LG6 | RmlC-like cupins superfamily   | not DE   | not DE   | not DE   | not DE |
| EVM0023921 | LG6 | RmlC-like cupins superfamily   | not DE   | not DE   | not DE   | not DE |
| EVM0004319 | LG6 | RmlC-like cupins superfamily   | not DE   | not DE   | not DE   | not DE |
| EVM0018538 | LG6 | RmlC-like cupins superfamily   | not DE   | not DE   | not DE   | not DE |
| EVM0018338 | LG6 | Root phototropism protein, pu  | not DE   | not DE   | not DE   | not DE |
| EVM0001586 | LG6 | S-norcoclaurine synthase       | not DE   | not DE   | not DE   | not DE |
| EVM0012180 | LG6 | SSXT family protein isoform 1  | not DE   | not DE   | not DE   | not DE |
| EVM0001529 | LG6 | Sec14p-like phosphatidylinosi  | not DE   | not DE   | not DE   | not DE |
| EVM0001303 | LG6 | Serine acetyltransferase 3, m  | not DE   | not DE   | not DE   | not DE |
| EVM0022166 | LG6 | Serine acetyltransferase 3, m  | not DE   | not DE   | not DE   | not DE |
| EVM0021186 | LG6 | Serine/threonine protein phos  | not DE   | not DE   | not DE   | not DE |
| EVM0011938 | LG6 | Serine/threonine-protein kin   | not DE   | not DE   | not DE   | not DE |
| EVM0022900 | LG6 | Serine/threonine-protein phos  | not DE   | not DE   | not DE   | not DE |
| EVM0013915 | LG6 | Slit protein C-product, putat  | not DE   | not DE   | not DE   | not DE |
| EVM0009144 | LG6 | Staurosporin and temperature   | not DE   | not DE   | not DE   | not DE |
| EVM0004799 | LG6 | Sulfate/thiosulfate import AT  | not DE   | not DE   | not DE   | not DE |
| EVM0024636 | LG6 | Tetraspanin2                   | not DE   | not DE   | not DE   | not DE |
| EVM0004715 | LG6 | Tetratricopeptide repeat (TPR  | not DE   | not DE   | not DE   | not DE |
| EVM0010024 | LG6 | Tetratricopeptide repeat supe  | not DE   | not DE   | not DE   | not DE |
| EVM0012296 | LG6 | Tetratricopeptide-like helica  | 1.898995 | 0.011533 | not DE   | not DE |
| EVM0017634 | LG6 | Thioredoxin F-type 1           | -1.32551 | 0.017892 | not DE   | not DE |
| EVM0002450 | LG6 | Transcription factor RAX1, pu  | not DE   | not DE   | not DE   | not DE |
| EVM0007015 | LG6 | Transcription factor jumonji   | not DE   | not DE   | not DE   | not DE |
| EVM0007121 | LG6 | Transducin/WD40 repeat-like s  | not DE   | not DE   | not DE   | not DE |
| EVM0013022 | LG6 | Tubulin folding cofactor A (K  | not DE   | not DE   | not DE   | not DE |
| EVM0017392 | LG6 | U6 snRNA-associated Sm-like p  | not DE   | not DE   | not DE   | not DE |
| EVM0020761 | LG6 | UDP-glucose flavonoid glucosy  | not DE   | not DE   | not DE   | not DE |
| EVM0014964 | LG6 | Uncharacterized protein TCM_C  | not DE   | not DE   | not DE   | not DE |
| EVM0021387 | LG6 | Uncharacterized protein TCM_C  | not DE   | not DE   | not DE   | not DE |
| EVM0001787 | LG6 | Uncharacterized protein TCM_C  | not DE   | not DE   | not DE   | not DE |
| EVM0023268 | LG6 | Uncharacterized protein TCM_C  | not DE   | not DE   | not DE   | not DE |
| EVM0015751 | LG6 | Uncharacterized protein TCM_C  | not DE   | not DE   | 1.127693 | #####  |
| EVM0016992 | LG6 | Uncharacterized protein TCM_C  | not DE   | not DE   | not DE   | not DE |

|            |     |                               |          |          |          |        |
|------------|-----|-------------------------------|----------|----------|----------|--------|
| EVM0015674 | LG6 | Uncharacterized protein TCM_0 | not DE   | not DE   | not DE   | not DE |
| EVM0020450 | LG6 | Uncharacterized protein TCM_0 | not DE   | not DE   | not DE   | not DE |
| EVM0014058 | LG6 | Uncharacterized protein TCM_0 | not DE   | not DE   | not DE   | not DE |
| EVM0014139 | LG6 | Uncharacterized protein TCM_0 | not DE   | not DE   | not DE   | not DE |
| EVM0000730 | LG6 | Uncharacterized protein TCM_0 | not DE   | not DE   | not DE   | not DE |
| EVM0021923 | LG6 | Uncharacterized protein TCM_0 | not DE   | not DE   | not DE   | not DE |
| EVM0019942 | LG6 | Uncharacterized protein TCM_0 | 2.331982 | 0.002135 | not DE   | not DE |
| EVM0000653 | LG6 | Uncharacterized protein isofo | not DE   | not DE   | not DE   | not DE |
| EVM0001778 | LG6 | Uncharacterized protein isofo | not DE   | not DE   | not DE   | not DE |
| EVM0012461 | LG6 | Uncharacterized protein isofo | not DE   | not DE   | not DE   | not DE |
| EVM0014913 | LG6 | Uncharacterized protein isofo | not DE   | not DE   | not DE   | not DE |
| EVM0019613 | LG6 | Uncharacterized protein isofo | not DE   | not DE   | not DE   | not DE |
| EVM0002807 | LG6 | Uncharacterized protein isofo | not DE   | not DE   | not DE   | not DE |
| EVM0000724 | LG6 | Villin 4 isoform 2            | not DE   | not DE   | not DE   | not DE |
| EVM0020928 | LG6 | WRKY DNA-binding protein 2, p | not DE   | not DE   | not DE   | not DE |
| EVM0017911 | LG6 | WUSCHEL related homeobox 11   | not DE   | not DE   | not DE   | not DE |
| EVM0018386 | LG6 | Xyloglucan endotransglucosyla | not DE   | not DE   | not DE   | not DE |
| EVM0018602 | LG6 | Ypt/Rab-GAP domain of gypl s  | not DE   | not DE   | not DE   | not DE |
| EVM0020704 | LG6 | Zinc finger C-x8-C-x5-C-x3-H  | not DE   | not DE   | not DE   | not DE |
| EVM0008972 | LG6 | acetyl-CoA acetyltransferase, | not DE   | not DE   | not DE   | not DE |
| EVM0008216 | LG6 | acetyl-CoA acetyltransferase, | not DE   | not DE   | not DE   | not DE |
| EVM0006259 | LG6 | acyl carrier protein, putativ | not DE   | not DE   | not DE   | not DE |
| EVM0008162 | LG6 | acyl carrier protein, putativ | not DE   | not DE   | not DE   | not DE |
| EVM0008277 | LG6 | acyl carrier protein, putativ | not DE   | not DE   | not DE   | not DE |
| EVM0010651 | LG6 | acyl carrier protein, putativ | not DE   | not DE   | not DE   | not DE |
| EVM0014240 | LG6 | acyl carrier protein, putativ | not DE   | not DE   | not DE   | not DE |
| EVM0020756 | LG6 | acyl carrier protein, putativ | not DE   | not DE   | not DE   | not DE |
| EVM0021464 | LG6 | acyl carrier protein, putativ | not DE   | not DE   | not DE   | not DE |
| EVM0016547 | LG6 | aldehyde dehydrogenase, putat | not DE   | not DE   | not DE   | not DE |
| EVM0000638 | LG6 | auxin response factor         | not DE   | not DE   | not DE   | not DE |
| EVM0005226 | LG6 | cinnamate 4-hydroxylase CYP73 | not DE   | not DE   | not DE   | not DE |
| EVM0022976 | LG6 | clock-associated PAS protein  | not DE   | not DE   | not DE   | not DE |
| EVM0000709 | LG6 | conserved hypothetical protei | not DE   | not DE   | not DE   | not DE |
| EVM0001584 | LG6 | conserved hypothetical protei | -2.28935 | 0.00029  | not DE   | not DE |
| EVM0003310 | LG6 | conserved hypothetical protei | not DE   | not DE   | not DE   | not DE |
| EVM0003449 | LG6 | conserved hypothetical protei | not DE   | not DE   | not DE   | not DE |
| EVM0008053 | LG6 | conserved hypothetical protei | not DE   | not DE   | not DE   | not DE |
| EVM0008957 | LG6 | conserved hypothetical protei | -1.74336 | 0.044879 | not DE   | not DE |
| EVM0011021 | LG6 | conserved hypothetical protei | not DE   | not DE   | not DE   | not DE |
| EVM0011375 | LG6 | conserved hypothetical protei | not DE   | not DE   | not DE   | not DE |
| EVM0012213 | LG6 | conserved hypothetical protei | not DE   | not DE   | not DE   | not DE |
| EVM0012814 | LG6 | conserved hypothetical protei | not DE   | not DE   | not DE   | not DE |
| EVM0017191 | LG6 | conserved hypothetical protei | not DE   | not DE   | not DE   | not DE |
| EVM0018046 | LG6 | conserved hypothetical protei | not DE   | not DE   | not DE   | not DE |
| EVM0018062 | LG6 | conserved hypothetical protei | not DE   | not DE   | not DE   | not DE |
| EVM0018178 | LG6 | conserved hypothetical protei | not DE   | not DE   | not DE   | not DE |
| EVM0019652 | LG6 | conserved hypothetical protei | not DE   | not DE   | not DE   | not DE |
| EVM0018068 | LG6 | copine, putative              | not DE   | not DE   | not DE   | not DE |
| EVM0018989 | LG6 | copine, putative              | not DE   | not DE   | not DE   | not DE |
| EVM0016500 | LG6 | copper/zinc-superoxide dismut | not DE   | not DE   | not DE   | not DE |
| EVM0020088 | LG6 | cyclin dependent kinase A     | not DE   | not DE   | not DE   | not DE |
| EVM0002875 | LG6 | dehydrin                      | 2.751663 | 0.000281 | 2.123044 | #####  |
| EVM0020210 | LG6 | diacylglycerol acyltransferas | not DE   | not DE   | not DE   | not DE |
| EVM0013093 | LG6 | earlier flowering 1           | not DE   | not DE   | not DE   | not DE |

|            |     |                                |        |        |          |         |
|------------|-----|--------------------------------|--------|--------|----------|---------|
| EVM0005182 | LG6 | electron transporter, putative | not DE | not DE | not DE   | not DE  |
| EVM0001705 | LG6 | flavanone-O-beta-L-rhamnosylt  | not DE | not DE | not DE   | not DE  |
| EVM0013999 | LG6 | flavanone-O-beta-L-rhamnosylt  | not DE | not DE | not DE   | not DE  |
| EVM0022396 | LG6 | flowering locus T              | not DE | not DE | not DE   | not DE  |
| EVM0012685 | LG6 | flowering locus T-like protein | not DE | not DE | not DE   | not DE  |
| EVM0021328 | LG6 | flowering locus T-like protein | not DE | not DE | not DE   | not DE  |
| EVM0000623 | LG6 | gag-pol polyprotein            | not DE | not DE | not DE   | not DE  |
| EVM0007111 | LG6 | gibberellin 20-oxidase family  | not DE | not DE | not DE   | not DE  |
| EVM0012706 | LG6 | glutamate dehydrogenase, puta  | not DE | not DE | not DE   | not DE  |
| EVM0005455 | LG6 | glutaredoxin                   | not DE | not DE | not DE   | not DE  |
| EVM0024213 | LG6 | glutaredoxin                   | not DE | not DE | not DE   | not DE  |
| EVM0017617 | LG6 | hexokinase                     | not DE | not DE | not DE   | not DE  |
| EVM0018761 | LG6 | hydrolase family protein       | not DE | not DE | not DE   | not DE  |
| EVM0009407 | LG6 | hypothetical protein           | not DE | not DE | not DE   | not DE  |
| EVM0018325 | LG6 | hypothetical protein           | not DE | not DE | not DE   | not DE  |
| EVM0020025 | LG6 | hypothetical protein 17        | not DE | not DE | not DE   | not DE  |
| EVM0023702 | LG6 | hypothetical protein AALP_AA3  | not DE | not DE | not DE   | not DE  |
| EVM0000193 | LG6 | hypothetical protein AMTR_s03  | not DE | not DE | not DE   | not DE  |
| EVM0001818 | LG6 | hypothetical protein AMTR_s05  | not DE | not DE | not DE   | not DE  |
| EVM0005095 | LG6 | hypothetical protein AMTR_s05  | not DE | not DE | not DE   | not DE  |
| EVM0006976 | LG6 | hypothetical protein CICLE_v1  | not DE | not DE | not DE   | not DE  |
| EVM0014713 | LG6 | hypothetical protein CICLE_v1  | not DE | not DE | -1.14476 | 0.00093 |
| EVM0006337 | LG6 | hypothetical protein CICLE_v1  | not DE | not DE | not DE   | not DE  |
| EVM0008051 | LG6 | hypothetical protein CICLE_v1  | not DE | not DE | not DE   | not DE  |
| EVM0005004 | LG6 | hypothetical protein CICLE_v1  | not DE | not DE | not DE   | not DE  |
| EVM0001182 | LG6 | hypothetical protein CICLE_v1  | not DE | not DE | not DE   | not DE  |
| EVM0000456 | LG6 | hypothetical protein CICLE_v1  | not DE | not DE | not DE   | not DE  |
| EVM0023755 | LG6 | hypothetical protein CICLE_v1  | not DE | not DE | not DE   | not DE  |
| EVM0017460 | LG6 | hypothetical protein CICLE_v1  | not DE | not DE | not DE   | not DE  |
| EVM0022392 | LG6 | hypothetical protein CICLE_v1  | not DE | not DE | not DE   | not DE  |
| EVM0008344 | LG6 | hypothetical protein CICLE_v1  | not DE | not DE | not DE   | not DE  |
| EVM0004100 | LG6 | hypothetical protein CICLE_v1  | not DE | not DE | not DE   | not DE  |
| EVM0004203 | LG6 | hypothetical protein CICLE_v1  | not DE | not DE | not DE   | not DE  |
| EVM0020386 | LG6 | hypothetical protein CICLE_v1  | not DE | not DE | not DE   | not DE  |
| EVM0003622 | LG6 | hypothetical protein CICLE_v1  | not DE | not DE | not DE   | not DE  |
| EVM0015571 | LG6 | hypothetical protein CICLE_v1  | not DE | not DE | not DE   | not DE  |
| EVM0021681 | LG6 | hypothetical protein CICLE_v1  | not DE | not DE | not DE   | not DE  |
| EVM0012373 | LG6 | hypothetical protein CICLE_v1  | not DE | not DE | not DE   | not DE  |
| EVM0008662 | LG6 | hypothetical protein CICLE_v1  | not DE | not DE | -1.24895 | #####   |
| EVM0013432 | LG6 | hypothetical protein CICLE_v1  | not DE | not DE | not DE   | not DE  |
| EVM0006562 | LG6 | hypothetical protein CICLE_v1  | not DE | not DE | not DE   | not DE  |
| EVM0021672 | LG6 | hypothetical protein CICLE_v1  | not DE | not DE | not DE   | not DE  |
| EVM0005331 | LG6 | hypothetical protein CICLE_v1  | not DE | not DE | not DE   | not DE  |
| EVM0021771 | LG6 | hypothetical protein CICLE_v1  | not DE | not DE | not DE   | not DE  |
| EVM0013935 | LG6 | hypothetical protein CICLE_v1  | not DE | not DE | not DE   | not DE  |
| EVM0001250 | LG6 | hypothetical protein CICLE_v1  | not DE | not DE | not DE   | not DE  |
| EVM0021124 | LG6 | hypothetical protein CICLE_v1  | not DE | not DE | not DE   | not DE  |
| EVM0001358 | LG6 | hypothetical protein CICLE_v1  | not DE | not DE | not DE   | not DE  |
| EVM0015291 | LG6 | hypothetical protein CICLE_v1  | not DE | not DE | not DE   | not DE  |
| EVM0015148 | LG6 | hypothetical protein CICLE_v1  | not DE | not DE | not DE   | not DE  |
| EVM0010559 | LG6 | hypothetical protein CICLE_v1  | not DE | not DE | not DE   | not DE  |
| EVM0022888 | LG6 | hypothetical protein CICLE_v1  | not DE | not DE | not DE   | not DE  |
| EVM0009652 | LG6 | hypothetical protein CICLE_v1  | not DE | not DE | not DE   | not DE  |
| EVM0013141 | LG6 | hypothetical protein CICLE_v1  | not DE | not DE | not DE   | not DE  |

|            |     |                               |          |          |          |         |
|------------|-----|-------------------------------|----------|----------|----------|---------|
| EVM0010668 | LG6 | hypothetical protein CICLE_v1 | not DE   | not DE   | not DE   | not DE  |
| EVM0007707 | LG6 | hypothetical protein CICLE_v1 | not DE   | not DE   | not DE   | not DE  |
| EVM0012263 | LG6 | hypothetical protein CICLE_v1 | not DE   | not DE   | not DE   | not DE  |
| EVM0004736 | LG6 | hypothetical protein CICLE_v1 | not DE   | not DE   | not DE   | not DE  |
| EVM0022829 | LG6 | hypothetical protein CICLE_v1 | not DE   | not DE   | not DE   | not DE  |
| EVM0002836 | LG6 | hypothetical protein CICLE_v1 | not DE   | not DE   | not DE   | not DE  |
| EVM0001205 | LG6 | hypothetical protein CICLE_v1 | not DE   | not DE   | not DE   | not DE  |
| EVM0005517 | LG6 | hypothetical protein CICLE_v1 | not DE   | not DE   | not DE   | not DE  |
| EVM0023374 | LG6 | hypothetical protein CICLE_v1 | not DE   | not DE   | not DE   | not DE  |
| EVM0019342 | LG6 | hypothetical protein CICLE_v1 | not DE   | not DE   | not DE   | not DE  |
| EVM0004264 | LG6 | hypothetical protein CICLE_v1 | not DE   | not DE   | not DE   | not DE  |
| EVM0010564 | LG6 | hypothetical protein CICLE_v1 | not DE   | not DE   | not DE   | not DE  |
| EVM0011210 | LG6 | hypothetical protein CICLE_v1 | not DE   | not DE   | not DE   | not DE  |
| EVM0013144 | LG6 | hypothetical protein CICLE_v1 | not DE   | not DE   | not DE   | not DE  |
| EVM0012959 | LG6 | hypothetical protein CICLE_v1 | not DE   | not DE   | not DE   | not DE  |
| EVM0021349 | LG6 | hypothetical protein CICLE_v1 | not DE   | not DE   | not DE   | not DE  |
| EVM0016892 | LG6 | hypothetical protein CICLE_v1 | not DE   | not DE   | not DE   | not DE  |
| EVM0018848 | LG6 | hypothetical protein CICLE_v1 | not DE   | not DE   | not DE   | not DE  |
| EVM0010611 | LG6 | hypothetical protein CICLE_v1 | 1.325594 | 0.01649  | not DE   | not DE  |
| EVM0022946 | LG6 | hypothetical protein CICLE_v1 | not DE   | not DE   | not DE   | not DE  |
| EVM0016843 | LG6 | hypothetical protein CICLE_v1 | not DE   | not DE   | not DE   | not DE  |
| EVM0005418 | LG6 | hypothetical protein CICLE_v1 | not DE   | not DE   | not DE   | not DE  |
| EVM0014493 | LG6 | hypothetical protein CICLE_v1 | not DE   | not DE   | not DE   | not DE  |
| EVM0022564 | LG6 | hypothetical protein CICLE_v1 | not DE   | not DE   | not DE   | not DE  |
| EVM0024004 | LG6 | hypothetical protein CICLE_v1 | not DE   | not DE   | not DE   | not DE  |
| EVM0000561 | LG6 | hypothetical protein CICLE_v1 | not DE   | not DE   | not DE   | not DE  |
| EVM0020752 | LG6 | hypothetical protein CICLE_v1 | not DE   | not DE   | not DE   | not DE  |
| EVM0001880 | LG6 | hypothetical protein CICLE_v1 | not DE   | not DE   | not DE   | not DE  |
| EVM0017546 | LG6 | hypothetical protein CICLE_v1 | not DE   | not DE   | not DE   | not DE  |
| EVM0018756 | LG6 | hypothetical protein CICLE_v1 | not DE   | not DE   | not DE   | not DE  |
| EVM0023073 | LG6 | hypothetical protein CICLE_v1 | not DE   | not DE   | not DE   | not DE  |
| EVM0007089 | LG6 | hypothetical protein CICLE_v1 | not DE   | not DE   | not DE   | not DE  |
| EVM0006195 | LG6 | hypothetical protein CICLE_v1 | not DE   | not DE   | not DE   | not DE  |
| EVM0015805 | LG6 | hypothetical protein CICLE_v1 | not DE   | not DE   | not DE   | not DE  |
| EVM0011057 | LG6 | hypothetical protein CICLE_v1 | not DE   | not DE   | not DE   | not DE  |
| EVM0003051 | LG6 | hypothetical protein CICLE_v1 | not DE   | not DE   | not DE   | not DE  |
| EVM0001343 | LG6 | hypothetical protein CICLE_v1 | -1.16579 | 0.013525 | not DE   | not DE  |
| EVM0015439 | LG6 | hypothetical protein CICLE_v1 | not DE   | not DE   | -2.01828 | 0.00827 |
| EVM0015127 | LG6 | hypothetical protein CICLE_v1 | not DE   | not DE   | not DE   | not DE  |
| EVM0006736 | LG6 | hypothetical protein CICLE_v1 | not DE   | not DE   | not DE   | not DE  |
| EVM0017533 | LG6 | hypothetical protein CICLE_v1 | not DE   | not DE   | not DE   | not DE  |
| EVM0004409 | LG6 | hypothetical protein CICLE_v1 | not DE   | not DE   | not DE   | not DE  |
| EVM0023509 | LG6 | hypothetical protein CICLE_v1 | not DE   | not DE   | not DE   | not DE  |
| EVM0019488 | LG6 | hypothetical protein CICLE_v1 | not DE   | not DE   | not DE   | not DE  |
| EVM0019656 | LG6 | hypothetical protein CICLE_v1 | not DE   | not DE   | not DE   | not DE  |
| EVM0000714 | LG6 | hypothetical protein CICLE_v1 | not DE   | not DE   | not DE   | not DE  |
| EVM0003171 | LG6 | hypothetical protein CICLE_v1 | not DE   | not DE   | not DE   | not DE  |
| EVM0004775 | LG6 | hypothetical protein CICLE_v1 | not DE   | not DE   | not DE   | not DE  |
| EVM0015897 | LG6 | hypothetical protein CICLE_v1 | not DE   | not DE   | not DE   | not DE  |
| EVM0019322 | LG6 | hypothetical protein CICLE_v1 | 1.79581  | 9.26E-05 | not DE   | not DE  |
| EVM0006707 | LG6 | hypothetical protein CICLE_v1 | not DE   | not DE   | not DE   | not DE  |
| EVM0023740 | LG6 | hypothetical protein CICLE_v1 | not DE   | not DE   | not DE   | not DE  |
| EVM0011933 | LG6 | hypothetical protein CICLE_v1 | not DE   | not DE   | not DE   | not DE  |
| EVM0022015 | LG6 | hypothetical protein CICLE_v1 | not DE   | not DE   | not DE   | not DE  |

|            |     |                               |          |          |          |         |
|------------|-----|-------------------------------|----------|----------|----------|---------|
| EVM0006859 | LG6 | hypothetical protein CICLE_v1 | not DE   | not DE   | not DE   | not DE  |
| EVM0018022 | LG6 | hypothetical protein CICLE_v1 | not DE   | not DE   | not DE   | not DE  |
| EVM0016609 | LG6 | hypothetical protein CICLE_v1 | not DE   | not DE   | not DE   | not DE  |
| EVM0020862 | LG6 | hypothetical protein CICLE_v1 | not DE   | not DE   | not DE   | not DE  |
| EVM0007548 | LG6 | hypothetical protein CICLE_v1 | not DE   | not DE   | not DE   | not DE  |
| EVM0016657 | LG6 | hypothetical protein CICLE_v1 | 1.591655 | 0.026743 | not DE   | not DE  |
| EVM0010903 | LG6 | hypothetical protein CICLE_v1 | not DE   | not DE   | not DE   | not DE  |
| EVM0023475 | LG6 | hypothetical protein CICLE_v1 | not DE   | not DE   | not DE   | not DE  |
| EVM0016430 | LG6 | hypothetical protein CICLE_v1 | not DE   | not DE   | not DE   | not DE  |
| EVM0004324 | LG6 | hypothetical protein CICLE_v1 | not DE   | not DE   | not DE   | not DE  |
| EVM0005903 | LG6 | hypothetical protein CICLE_v1 | not DE   | not DE   | not DE   | not DE  |
| EVM0024246 | LG6 | hypothetical protein CICLE_v1 | not DE   | not DE   | not DE   | not DE  |
| EVM0002694 | LG6 | hypothetical protein CICLE_v1 | not DE   | not DE   | not DE   | not DE  |
| EVM0022907 | LG6 | hypothetical protein CICLE_v1 | not DE   | not DE   | not DE   | not DE  |
| EVM0004957 | LG6 | hypothetical protein CICLE_v1 | not DE   | not DE   | not DE   | not DE  |
| EVM0004468 | LG6 | hypothetical protein CICLE_v1 | not DE   | not DE   | not DE   | not DE  |
| EVM0008912 | LG6 | hypothetical protein CICLE_v1 | not DE   | not DE   | not DE   | not DE  |
| EVM0002051 | LG6 | hypothetical protein CICLE_v1 | not DE   | not DE   | not DE   | not DE  |
| EVM0020029 | LG6 | hypothetical protein CICLE_v1 | 1.83903  | 2.14E-08 | not DE   | not DE  |
| EVM0006192 | LG6 | hypothetical protein CICLE_v1 | not DE   | not DE   | not DE   | not DE  |
| EVM0013359 | LG6 | hypothetical protein CICLE_v1 | not DE   | not DE   | not DE   | not DE  |
| EVM0015968 | LG6 | hypothetical protein CICLE_v1 | not DE   | not DE   | not DE   | not DE  |
| EVM0020982 | LG6 | hypothetical protein CICLE_v1 | not DE   | not DE   | not DE   | not DE  |
| EVM0016094 | LG6 | hypothetical protein CICLE_v1 | not DE   | not DE   | -1.09174 | 0.01152 |
| EVM0010985 | LG6 | hypothetical protein CICLE_v1 | not DE   | not DE   | not DE   | not DE  |
| EVM0007621 | LG6 | hypothetical protein CICLE_v1 | not DE   | not DE   | -1.27725 | 0.00475 |
| EVM0003687 | LG6 | hypothetical protein CICLE_v1 | not DE   | not DE   | not DE   | not DE  |
| EVM0018751 | LG6 | hypothetical protein CICLE_v1 | not DE   | not DE   | not DE   | not DE  |
| EVM0015872 | LG6 | hypothetical protein CICLE_v1 | not DE   | not DE   | not DE   | not DE  |
| EVM0007229 | LG6 | hypothetical protein CICLE_v1 | not DE   | not DE   | not DE   | not DE  |
| EVM0018882 | LG6 | hypothetical protein CICLE_v1 | -1.03836 | 0.048743 | not DE   | not DE  |
| EVM0016525 | LG6 | hypothetical protein CICLE_v1 | not DE   | not DE   | not DE   | not DE  |
| EVM0011991 | LG6 | hypothetical protein CICLE_v1 | not DE   | not DE   | not DE   | not DE  |
| EVM0007858 | LG6 | hypothetical protein CICLE_v1 | not DE   | not DE   | not DE   | not DE  |
| EVM0007311 | LG6 | hypothetical protein CICLE_v1 | not DE   | not DE   | not DE   | not DE  |
| EVM0001134 | LG6 | hypothetical protein CICLE_v1 | not DE   | not DE   | not DE   | not DE  |
| EVM0000945 | LG6 | hypothetical protein CICLE_v1 | not DE   | not DE   | not DE   | not DE  |
| EVM0013971 | LG6 | hypothetical protein CICLE_v1 | not DE   | not DE   | not DE   | not DE  |
| EVM0015205 | LG6 | hypothetical protein CICLE_v1 | not DE   | not DE   | not DE   | not DE  |
| EVM0011520 | LG6 | hypothetical protein CICLE_v1 | not DE   | not DE   | not DE   | not DE  |
| EVM0000350 | LG6 | hypothetical protein CICLE_v1 | not DE   | not DE   | not DE   | not DE  |
| EVM0019026 | LG6 | hypothetical protein CICLE_v1 | not DE   | not DE   | not DE   | not DE  |
| EVM0021850 | LG6 | hypothetical protein CICLE_v1 | 1.496366 | 0.001165 | not DE   | not DE  |
| EVM0024408 | LG6 | hypothetical protein CICLE_v1 | 1.050468 | 0.000175 | not DE   | not DE  |
| EVM0019849 | LG6 | hypothetical protein CICLE_v1 | not DE   | not DE   | not DE   | not DE  |
| EVM0002072 | LG6 | hypothetical protein CICLE_v1 | not DE   | not DE   | not DE   | not DE  |
| EVM0019627 | LG6 | hypothetical protein CICLE_v1 | not DE   | not DE   | not DE   | not DE  |
| EVM0009759 | LG6 | hypothetical protein CICLE_v1 | not DE   | not DE   | not DE   | not DE  |
| EVM0021271 | LG6 | hypothetical protein CICLE_v1 | not DE   | not DE   | not DE   | not DE  |
| EVM0002843 | LG6 | hypothetical protein CICLE_v1 | not DE   | not DE   | not DE   | not DE  |
| EVM0018871 | LG6 | hypothetical protein CICLE_v1 | not DE   | not DE   | not DE   | not DE  |
| EVM0022519 | LG6 | hypothetical protein CICLE_v1 | not DE   | not DE   | not DE   | not DE  |
| EVM0004946 | LG6 | hypothetical protein CICLE_v1 | not DE   | not DE   | not DE   | not DE  |
| EVM0006943 | LG6 | hypothetical protein CICLE_v1 | not DE   | not DE   | not DE   | not DE  |

|            |     |                               |          |          |          |        |
|------------|-----|-------------------------------|----------|----------|----------|--------|
| EVM0011399 | LG6 | hypothetical protein CICLE_v1 | not DE   | not DE   | not DE   | not DE |
| EVM0023735 | LG6 | hypothetical protein CICLE_v1 | not DE   | not DE   | not DE   | not DE |
| EVM0019427 | LG6 | hypothetical protein CICLE_v1 | not DE   | not DE   | not DE   | not DE |
| EVM0020119 | LG6 | hypothetical protein CICLE_v1 | not DE   | not DE   | not DE   | not DE |
| EVM0001000 | LG6 | hypothetical protein CICLE_v1 | not DE   | not DE   | not DE   | not DE |
| EVM0021816 | LG6 | hypothetical protein CICLE_v1 | not DE   | not DE   | not DE   | not DE |
| EVM0017655 | LG6 | hypothetical protein CICLE_v1 | not DE   | not DE   | not DE   | not DE |
| EVM0007392 | LG6 | hypothetical protein CICLE_v1 | not DE   | not DE   | not DE   | not DE |
| EVM0018915 | LG6 | hypothetical protein CICLE_v1 | not DE   | not DE   | not DE   | not DE |
| EVM0012658 | LG6 | hypothetical protein CICLE_v1 | not DE   | not DE   | not DE   | not DE |
| EVM0004273 | LG6 | hypothetical protein CICLE_v1 | not DE   | not DE   | not DE   | not DE |
| EVM0012622 | LG6 | hypothetical protein CICLE_v1 | not DE   | not DE   | not DE   | not DE |
| EVM0012973 | LG6 | hypothetical protein CICLE_v1 | not DE   | not DE   | not DE   | not DE |
| EVM0007078 | LG6 | hypothetical protein CICLE_v1 | 1.126396 | 9.09E-07 | not DE   | not DE |
| EVM0010061 | LG6 | hypothetical protein CICLE_v1 | not DE   | not DE   | not DE   | not DE |
| EVM0003617 | LG6 | hypothetical protein CICLE_v1 | not DE   | not DE   | not DE   | not DE |
| EVM0003701 | LG6 | hypothetical protein CICLE_v1 | not DE   | not DE   | not DE   | not DE |
| EVM0005461 | LG6 | hypothetical protein CICLE_v1 | not DE   | not DE   | not DE   | not DE |
| EVM0011016 | LG6 | hypothetical protein CICLE_v1 | 1.206773 | 0.020997 | not DE   | not DE |
| EVM0005072 | LG6 | hypothetical protein CICLE_v1 | not DE   | not DE   | not DE   | not DE |
| EVM0006768 | LG6 | hypothetical protein CICLE_v1 | not DE   | not DE   | not DE   | not DE |
| EVM0013129 | LG6 | hypothetical protein CICLE_v1 | not DE   | not DE   | not DE   | not DE |
| EVM0018105 | LG6 | hypothetical protein CICLE_v1 | not DE   | not DE   | not DE   | not DE |
| EVM0003536 | LG6 | hypothetical protein CICLE_v1 | not DE   | not DE   | not DE   | not DE |
| EVM0011401 | LG6 | hypothetical protein CICLE_v1 | not DE   | not DE   | not DE   | not DE |
| EVM0013056 | LG6 | hypothetical protein CICLE_v1 | not DE   | not DE   | not DE   | not DE |
| EVM0021528 | LG6 | hypothetical protein CICLE_v1 | not DE   | not DE   | not DE   | not DE |
| EVM0005186 | LG6 | hypothetical protein CICLE_v1 | not DE   | not DE   | not DE   | not DE |
| EVM0008599 | LG6 | hypothetical protein CICLE_v1 | not DE   | not DE   | not DE   | not DE |
| EVM0004876 | LG6 | hypothetical protein CICLE_v1 | not DE   | not DE   | not DE   | not DE |
| EVM0017426 | LG6 | hypothetical protein CICLE_v1 | not DE   | not DE   | not DE   | not DE |
| EVM0014653 | LG6 | hypothetical protein CICLE_v1 | not DE   | not DE   | not DE   | not DE |
| EVM0003402 | LG6 | hypothetical protein CICLE_v1 | not DE   | not DE   | not DE   | not DE |
| EVM0005223 | LG6 | hypothetical protein CICLE_v1 | not DE   | not DE   | not DE   | not DE |
| EVM0016382 | LG6 | hypothetical protein CICLE_v1 | not DE   | not DE   | not DE   | not DE |
| EVM0021876 | LG6 | hypothetical protein CICLE_v1 | not DE   | not DE   | not DE   | not DE |
| EVM0021363 | LG6 | hypothetical protein CICLE_v1 | not DE   | not DE   | not DE   | not DE |
| EVM0017925 | LG6 | hypothetical protein CICLE_v1 | 1.577064 | 8.03E-06 | not DE   | not DE |
| EVM0015569 | LG6 | hypothetical protein CICLE_v1 | not DE   | not DE   | not DE   | not DE |
| EVM0014052 | LG6 | hypothetical protein CICLE_v1 | not DE   | not DE   | not DE   | not DE |
| EVM0007564 | LG6 | hypothetical protein CICLE_v1 | not DE   | not DE   | not DE   | not DE |
| EVM0004900 | LG6 | hypothetical protein CICLE_v1 | not DE   | not DE   | not DE   | not DE |
| EVM0011946 | LG6 | hypothetical protein CICLE_v1 | not DE   | not DE   | not DE   | not DE |
| EVM0015993 | LG6 | hypothetical protein CICLE_v1 | not DE   | not DE   | not DE   | not DE |
| EVM0022988 | LG6 | hypothetical protein CICLE_v1 | not DE   | not DE   | not DE   | not DE |
| EVM0014092 | LG6 | hypothetical protein CICLE_v1 | not DE   | not DE   | not DE   | not DE |
| EVM0006401 | LG6 | hypothetical protein CICLE_v1 | not DE   | not DE   | not DE   | not DE |
| EVM0014260 | LG6 | hypothetical protein CICLE_v1 | not DE   | not DE   | not DE   | not DE |
| EVM0012336 | LG6 | hypothetical protein CICLE_v1 | -2.51413 | 5.17E-06 | -2.55083 | #####  |
| EVM0016457 | LG6 | hypothetical protein CICLE_v1 | not DE   | not DE   | not DE   | not DE |
| EVM0016504 | LG6 | hypothetical protein CICLE_v1 | not DE   | not DE   | not DE   | not DE |
| EVM0004943 | LG6 | hypothetical protein CICLE_v1 | not DE   | not DE   | not DE   | not DE |
| EVM0006998 | LG6 | hypothetical protein CICLE_v1 | not DE   | not DE   | not DE   | not DE |
| EVM0009816 | LG6 | hypothetical protein CICLE_v1 | not DE   | not DE   | not DE   | not DE |



|            |     |                               |          |          |          |         |
|------------|-----|-------------------------------|----------|----------|----------|---------|
| EVM0009832 | LG6 | hypothetical protein CICLE_v1 | not DE   | not DE   | 2.933492 | 0.00373 |
| EVM0017039 | LG6 | hypothetical protein CICLE_v1 | not DE   | not DE   | not DE   | not DE  |
| EVM0010495 | LG6 | hypothetical protein CICLE_v1 | not DE   | not DE   | not DE   | not DE  |
| EVM0014277 | LG6 | hypothetical protein CICLE_v1 | not DE   | not DE   | not DE   | not DE  |
| EVM0019759 | LG6 | hypothetical protein CICLE_v1 | not DE   | not DE   | not DE   | not DE  |
| EVM0008902 | LG6 | hypothetical protein CICLE_v1 | not DE   | not DE   | not DE   | not DE  |
| EVM0000589 | LG6 | hypothetical protein CICLE_v1 | not DE   | not DE   | not DE   | not DE  |
| EVM0005334 | LG6 | hypothetical protein CICLE_v1 | 2.196262 | 0.008608 | 3.257326 | #####   |
| EVM0022929 | LG6 | hypothetical protein CICLE_v1 | not DE   | not DE   | not DE   | not DE  |
| EVM0003187 | LG6 | hypothetical protein CICLE_v1 | not DE   | not DE   | not DE   | not DE  |
| EVM0002674 | LG6 | hypothetical protein CICLE_v1 | not DE   | not DE   | not DE   | not DE  |
| EVM0005138 | LG6 | hypothetical protein CICLE_v1 | not DE   | not DE   | not DE   | not DE  |
| EVM0006493 | LG6 | hypothetical protein CICLE_v1 | not DE   | not DE   | not DE   | not DE  |
| EVM0023184 | LG6 | hypothetical protein CICLE_v1 | not DE   | not DE   | not DE   | not DE  |
| EVM0015454 | LG6 | hypothetical protein CICLE_v1 | -1.72614 | 8.30E-11 | not DE   | not DE  |
| EVM0009034 | LG6 | hypothetical protein CICLE_v1 | not DE   | not DE   | not DE   | not DE  |
| EVM0000634 | LG6 | hypothetical protein CICLE_v1 | not DE   | not DE   | not DE   | not DE  |
| EVM0015597 | LG6 | hypothetical protein CICLE_v1 | not DE   | not DE   | not DE   | not DE  |
| EVM0012514 | LG6 | hypothetical protein CICLE_v1 | -1.64205 | 7.46E-08 | not DE   | not DE  |
| EVM0000950 | LG6 | hypothetical protein CICLE_v1 | not DE   | not DE   | not DE   | not DE  |
| EVM0006937 | LG6 | hypothetical protein CICLE_v1 | not DE   | not DE   | not DE   | not DE  |
| EVM0008973 | LG6 | hypothetical protein CICLE_v1 | not DE   | not DE   | not DE   | not DE  |
| EVM0010274 | LG6 | hypothetical protein CICLE_v1 | not DE   | not DE   | not DE   | not DE  |
| EVM0010362 | LG6 | hypothetical protein CICLE_v1 | not DE   | not DE   | not DE   | not DE  |
| EVM0007681 | LG6 | hypothetical protein CICLE_v1 | not DE   | not DE   | not DE   | not DE  |
| EVM0022817 | LG6 | hypothetical protein CICLE_v1 | not DE   | not DE   | not DE   | not DE  |
| EVM0000406 | LG6 | hypothetical protein CICLE_v1 | not DE   | not DE   | not DE   | not DE  |
| EVM0014484 | LG6 | hypothetical protein CICLE_v1 | not DE   | not DE   | not DE   | not DE  |
| EVM0005221 | LG6 | hypothetical protein CICLE_v1 | not DE   | not DE   | not DE   | not DE  |
| EVM0010209 | LG6 | hypothetical protein CICLE_v1 | not DE   | not DE   | not DE   | not DE  |
| EVM0001762 | LG6 | hypothetical protein CICLE_v1 | not DE   | not DE   | not DE   | not DE  |
| EVM0013136 | LG6 | hypothetical protein CICLE_v1 | not DE   | not DE   | 1.331206 | #####   |
| EVM0001424 | LG6 | hypothetical protein CICLE_v1 | not DE   | not DE   | not DE   | not DE  |
| EVM0006009 | LG6 | hypothetical protein CICLE_v1 | -3.65397 | 0.040279 | 2.095451 | 0.01692 |
| EVM0004971 | LG6 | hypothetical protein CICLE_v1 | not DE   | not DE   | not DE   | not DE  |
| EVM0002778 | LG6 | hypothetical protein CICLE_v1 | not DE   | not DE   | not DE   | not DE  |
| EVM0007860 | LG6 | hypothetical protein CICLE_v1 | not DE   | not DE   | not DE   | not DE  |
| EVM0012345 | LG6 | hypothetical protein CICLE_v1 | not DE   | not DE   | not DE   | not DE  |
| EVM0021466 | LG6 | hypothetical protein CICLE_v1 | not DE   | not DE   | not DE   | not DE  |
| EVM0011550 | LG6 | hypothetical protein CICLE_v1 | not DE   | not DE   | not DE   | not DE  |
| EVM0010708 | LG6 | hypothetical protein CICLE_v1 | not DE   | not DE   | not DE   | not DE  |
| EVM0016711 | LG6 | hypothetical protein CICLE_v1 | not DE   | not DE   | not DE   | not DE  |
| EVM0021238 | LG6 | hypothetical protein CICLE_v1 | not DE   | not DE   | not DE   | not DE  |
| EVM0007425 | LG6 | hypothetical protein CICLE_v1 | not DE   | not DE   | not DE   | not DE  |
| EVM0016344 | LG6 | hypothetical protein CICLE_v1 | not DE   | not DE   | not DE   | not DE  |
| EVM0020083 | LG6 | hypothetical protein CICLE_v1 | not DE   | not DE   | not DE   | not DE  |
| EVM0021934 | LG6 | hypothetical protein CICLE_v1 | not DE   | not DE   | not DE   | not DE  |
| EVM0007772 | LG6 | hypothetical protein CICLE_v1 | not DE   | not DE   | not DE   | not DE  |
| EVM0024285 | LG6 | hypothetical protein CICLE_v1 | not DE   | not DE   | not DE   | not DE  |
| EVM0022432 | LG6 | hypothetical protein CICLE_v1 | not DE   | not DE   | not DE   | not DE  |
| EVM0014783 | LG6 | hypothetical protein CICLE_v1 | not DE   | not DE   | not DE   | not DE  |
| EVM0021467 | LG6 | hypothetical protein CICLE_v1 | not DE   | not DE   | not DE   | not DE  |
| EVM0010797 | LG6 | hypothetical protein CICLE_v1 | 1.640061 | 0.026705 | not DE   | not DE  |
| EVM0001111 | LG6 | hypothetical protein CICLE_v1 | not DE   | not DE   | not DE   | not DE  |

|            |     |                               |          |          |          |        |
|------------|-----|-------------------------------|----------|----------|----------|--------|
| EVM0016848 | LG6 | hypothetical protein CICLE_v1 | not DE   | not DE   | not DE   | not DE |
| EVM0001968 | LG6 | hypothetical protein CICLE_v1 | not DE   | not DE   | not DE   | not DE |
| EVM0021906 | LG6 | hypothetical protein CICLE_v1 | not DE   | not DE   | not DE   | not DE |
| EVM0005436 | LG6 | hypothetical protein CICLE_v1 | 1.441125 | 0.031679 | not DE   | not DE |
| EVM0023120 | LG6 | hypothetical protein CICLE_v1 | not DE   | not DE   | not DE   | not DE |
| EVM0016554 | LG6 | hypothetical protein CICLE_v1 | not DE   | not DE   | not DE   | not DE |
| EVM0003136 | LG6 | hypothetical protein CICLE_v1 | not DE   | not DE   | not DE   | not DE |
| EVM0021402 | LG6 | hypothetical protein CICLE_v1 | not DE   | not DE   | not DE   | not DE |
| EVM0000845 | LG6 | hypothetical protein CICLE_v1 | not DE   | not DE   | not DE   | not DE |
| EVM0007676 | LG6 | hypothetical protein CICLE_v1 | not DE   | not DE   | not DE   | not DE |
| EVM0017147 | LG6 | hypothetical protein CICLE_v1 | not DE   | not DE   | -1.09475 | #####  |
| EVM0024500 | LG6 | hypothetical protein CICLE_v1 | not DE   | not DE   | not DE   | not DE |
| EVM0006393 | LG6 | hypothetical protein CICLE_v1 | not DE   | not DE   | not DE   | not DE |
| EVM0016434 | LG6 | hypothetical protein CICLE_v1 | not DE   | not DE   | not DE   | not DE |
| EVM0002740 | LG6 | hypothetical protein CICLE_v1 | not DE   | not DE   | not DE   | not DE |
| EVM0001927 | LG6 | hypothetical protein CICLE_v1 | 1.359417 | 0.001628 | not DE   | not DE |
| EVM0001263 | LG6 | hypothetical protein CICLE_v1 | not DE   | not DE   | not DE   | not DE |
| EVM0020374 | LG6 | hypothetical protein CICLE_v1 | not DE   | not DE   | not DE   | not DE |
| EVM0018879 | LG6 | hypothetical protein CICLE_v1 | not DE   | not DE   | not DE   | not DE |
| EVM0004664 | LG6 | hypothetical protein CICLE_v1 | not DE   | not DE   | not DE   | not DE |
| EVM0012990 | LG6 | hypothetical protein CICLE_v1 | not DE   | not DE   | not DE   | not DE |
| EVM0018248 | LG6 | hypothetical protein CICLE_v1 | -1.27331 | 0.002538 | not DE   | not DE |
| EVM0016512 | LG6 | hypothetical protein CICLE_v1 | not DE   | not DE   | not DE   | not DE |
| EVM0003448 | LG6 | hypothetical protein CICLE_v1 | not DE   | not DE   | not DE   | not DE |
| EVM0015702 | LG6 | hypothetical protein CICLE_v1 | not DE   | not DE   | not DE   | not DE |
| EVM0023235 | LG6 | hypothetical protein CICLE_v1 | not DE   | not DE   | not DE   | not DE |
| EVM0003277 | LG6 | hypothetical protein CICLE_v1 | not DE   | not DE   | not DE   | not DE |
| EVM0003104 | LG6 | hypothetical protein CICLE_v1 | not DE   | not DE   | not DE   | not DE |
| EVM0012682 | LG6 | hypothetical protein CICLE_v1 | not DE   | not DE   | not DE   | not DE |
| EVM0003180 | LG6 | hypothetical protein CICLE_v1 | -1.37488 | 0.000128 | -1.00629 | #####  |
| EVM0019372 | LG6 | hypothetical protein CICLE_v1 | not DE   | not DE   | not DE   | not DE |
| EVM0010899 | LG6 | hypothetical protein CICLE_v1 | not DE   | not DE   | not DE   | not DE |
| EVM0015223 | LG6 | hypothetical protein CICLE_v1 | not DE   | not DE   | not DE   | not DE |
| EVM0020050 | LG6 | hypothetical protein CICLE_v1 | not DE   | not DE   | not DE   | not DE |
| EVM0013654 | LG6 | hypothetical protein CICLE_v1 | not DE   | not DE   | not DE   | not DE |
| EVM0012128 | LG6 | hypothetical protein CICLE_v1 | not DE   | not DE   | not DE   | not DE |
| EVM0021106 | LG6 | hypothetical protein CICLE_v1 | not DE   | not DE   | not DE   | not DE |
| EVM0018731 | LG6 | hypothetical protein CICLE_v1 | not DE   | not DE   | not DE   | not DE |
| EVM0024430 | LG6 | hypothetical protein CICLE_v1 | not DE   | not DE   | not DE   | not DE |
| EVM0022960 | LG6 | hypothetical protein CICLE_v1 | not DE   | not DE   | not DE   | not DE |
| EVM0019970 | LG6 | hypothetical protein CICLE_v1 | not DE   | not DE   | not DE   | not DE |
| EVM0010695 | LG6 | hypothetical protein CICLE_v1 | not DE   | not DE   | not DE   | not DE |
| EVM0020035 | LG6 | hypothetical protein CICLE_v1 | not DE   | not DE   | not DE   | not DE |
| EVM0023968 | LG6 | hypothetical protein CICLE_v1 | not DE   | not DE   | not DE   | not DE |
| EVM0017763 | LG6 | hypothetical protein CICLE_v1 | not DE   | not DE   | not DE   | not DE |
| EVM0009310 | LG6 | hypothetical protein CICLE_v1 | not DE   | not DE   | not DE   | not DE |
| EVM0018006 | LG6 | hypothetical protein CICLE_v1 | not DE   | not DE   | not DE   | not DE |
| EVM0017587 | LG6 | hypothetical protein CICLE_v1 | not DE   | not DE   | not DE   | not DE |
| EVM0020008 | LG6 | hypothetical protein CICLE_v1 | 1.738958 | 0.00115  | not DE   | not DE |
| EVM0018573 | LG6 | hypothetical protein CICLE_v1 | not DE   | not DE   | not DE   | not DE |
| EVM0006220 | LG6 | hypothetical protein CICLE_v1 | not DE   | not DE   | not DE   | not DE |
| EVM0001913 | LG6 | hypothetical protein CICLE_v1 | not DE   | not DE   | not DE   | not DE |
| EVM0021053 | LG6 | hypothetical protein CICLE_v1 | not DE   | not DE   | not DE   | not DE |
| EVM0004657 | LG6 | hypothetical protein CICLE_v1 | not DE   | not DE   | not DE   | not DE |

|            |     |                               |        |        |          |         |
|------------|-----|-------------------------------|--------|--------|----------|---------|
| EVM0024238 | LG6 | hypothetical protein CICLE_v1 | not DE | not DE | not DE   | not DE  |
| EVM0007442 | LG6 | hypothetical protein CICLE_v1 | not DE | not DE | not DE   | not DE  |
| EVM0016181 | LG6 | hypothetical protein CICLE_v1 | not DE | not DE | not DE   | not DE  |
| EVM0011358 | LG6 | hypothetical protein CICLE_v1 | not DE | not DE | not DE   | not DE  |
| EVM0006101 | LG6 | hypothetical protein CICLE_v1 | not DE | not DE | not DE   | not DE  |
| EVM0020474 | LG6 | hypothetical protein CICLE_v1 | not DE | not DE | not DE   | not DE  |
| EVM0000637 | LG6 | hypothetical protein CICLE_v1 | not DE | not DE | not DE   | not DE  |
| EVM0000596 | LG6 | hypothetical protein CICLE_v1 | not DE | not DE | not DE   | not DE  |
| EVM0020265 | LG6 | hypothetical protein CICLE_v1 | not DE | not DE | 1.446455 | 0.02458 |
| EVM0004066 | LG6 | hypothetical protein CICLE_v1 | not DE | not DE | not DE   | not DE  |
| EVM0016099 | LG6 | hypothetical protein CICLE_v1 | not DE | not DE | not DE   | not DE  |
| EVM0004489 | LG6 | hypothetical protein CICLE_v1 | not DE | not DE | not DE   | not DE  |
| EVM0004831 | LG6 | hypothetical protein CICLE_v1 | not DE | not DE | not DE   | not DE  |
| EVM0016639 | LG6 | hypothetical protein CICLE_v1 | not DE | not DE | 1.008399 | 0.0125  |
| EVM0023388 | LG6 | hypothetical protein CICLE_v1 | not DE | not DE | not DE   | not DE  |
| EVM0010606 | LG6 | hypothetical protein CICLE_v1 | not DE | not DE | not DE   | not DE  |
| EVM0017439 | LG6 | hypothetical protein CICLE_v1 | not DE | not DE | not DE   | not DE  |
| EVM0010761 | LG6 | hypothetical protein CICLE_v1 | not DE | not DE | not DE   | not DE  |
| EVM0019609 | LG6 | hypothetical protein CICLE_v1 | not DE | not DE | not DE   | not DE  |
| EVM0018925 | LG6 | hypothetical protein CICLE_v1 | not DE | not DE | not DE   | not DE  |
| EVM0020566 | LG6 | hypothetical protein CICLE_v1 | not DE | not DE | not DE   | not DE  |
| EVM0006123 | LG6 | hypothetical protein CICLE_v1 | not DE | not DE | not DE   | not DE  |
| EVM0016539 | LG6 | hypothetical protein CICLE_v1 | not DE | not DE | not DE   | not DE  |
| EVM0000455 | LG6 | hypothetical protein CICLE_v1 | not DE | not DE | not DE   | not DE  |
| EVM0019879 | LG6 | hypothetical protein CICLE_v1 | not DE | not DE | not DE   | not DE  |
| EVM0017810 | LG6 | hypothetical protein CICLE_v1 | not DE | not DE | not DE   | not DE  |
| EVM0021296 | LG6 | hypothetical protein CICLE_v1 | not DE | not DE | not DE   | not DE  |
| EVM0008025 | LG6 | hypothetical protein CICLE_v1 | not DE | not DE | not DE   | not DE  |
| EVM0008799 | LG6 | hypothetical protein CICLE_v1 | not DE | not DE | not DE   | not DE  |
| EVM0023217 | LG6 | hypothetical protein CICLE_v1 | not DE | not DE | not DE   | not DE  |
| EVM0013502 | LG6 | hypothetical protein CICLE_v1 | not DE | not DE | not DE   | not DE  |
| EVM0005980 | LG6 | hypothetical protein CICLE_v1 | not DE | not DE | -1.0673  | #####   |
| EVM0000661 | LG6 | hypothetical protein CICLE_v1 | not DE | not DE | not DE   | not DE  |
| EVM0004645 | LG6 | hypothetical protein CICLE_v1 | not DE | not DE | not DE   | not DE  |
| EVM0014404 | LG6 | hypothetical protein CICLE_v1 | not DE | not DE | not DE   | not DE  |
| EVM0008341 | LG6 | hypothetical protein CICLE_v1 | not DE | not DE | -1.23387 | #####   |
| EVM0005490 | LG6 | hypothetical protein CICLE_v1 | not DE | not DE | not DE   | not DE  |
| EVM0003115 | LG6 | hypothetical protein CICLE_v1 | not DE | not DE | not DE   | not DE  |
| EVM0014448 | LG6 | hypothetical protein CICLE_v1 | not DE | not DE | not DE   | not DE  |
| EVM0015784 | LG6 | hypothetical protein CICLE_v1 | not DE | not DE | not DE   | not DE  |
| EVM0023495 | LG6 | hypothetical protein CICLE_v1 | not DE | not DE | not DE   | not DE  |
| EVM0001044 | LG6 | hypothetical protein CICLE_v1 | not DE | not DE | not DE   | not DE  |
| EVM0007601 | LG6 | hypothetical protein CICLE_v1 | not DE | not DE | not DE   | not DE  |
| EVM0024670 | LG6 | hypothetical protein CICLE_v1 | not DE | not DE | not DE   | not DE  |
| EVM0012946 | LG6 | hypothetical protein CICLE_v1 | not DE | not DE | not DE   | not DE  |
| EVM0019920 | LG6 | hypothetical protein CICLE_v1 | not DE | not DE | not DE   | not DE  |
| EVM0020537 | LG6 | hypothetical protein CICLE_v1 | not DE | not DE | not DE   | not DE  |
| EVM0014011 | LG6 | hypothetical protein CICLE_v1 | not DE | not DE | not DE   | not DE  |
| EVM0017286 | LG6 | hypothetical protein CICLE_v1 | not DE | not DE | not DE   | not DE  |
| EVM0015523 | LG6 | hypothetical protein CICLE_v1 | not DE | not DE | not DE   | not DE  |
| EVM0016745 | LG6 | hypothetical protein CICLE_v1 | not DE | not DE | not DE   | not DE  |
| EVM0016389 | LG6 | hypothetical protein CICLE_v1 | not DE | not DE | -1.14293 | 0.04106 |
| EVM0003086 | LG6 | hypothetical protein CICLE_v1 | not DE | not DE | not DE   | not DE  |
| EVM0005150 | LG6 | hypothetical protein CICLE_v1 | not DE | not DE | not DE   | not DE  |

|            |     |                               |          |          |          |         |
|------------|-----|-------------------------------|----------|----------|----------|---------|
| EVM0009638 | LG6 | hypothetical protein CICLE_v1 | not DE   | not DE   | not DE   | not DE  |
| EVM0013159 | LG6 | hypothetical protein CICLE_v1 | not DE   | not DE   | not DE   | not DE  |
| EVM0009406 | LG6 | hypothetical protein CICLE_v1 | not DE   | not DE   | not DE   | not DE  |
| EVM0018052 | LG6 | hypothetical protein CICLE_v1 | not DE   | not DE   | not DE   | not DE  |
| EVM0004103 | LG6 | hypothetical protein CICLE_v1 | not DE   | not DE   | not DE   | not DE  |
| EVM0016377 | LG6 | hypothetical protein CICLE_v1 | not DE   | not DE   | not DE   | not DE  |
| EVM0001648 | LG6 | hypothetical protein CICLE_v1 | not DE   | not DE   | not DE   | not DE  |
| EVM0018484 | LG6 | hypothetical protein CICLE_v1 | not DE   | not DE   | not DE   | not DE  |
| EVM0003504 | LG6 | hypothetical protein CICLE_v1 | not DE   | not DE   | not DE   | not DE  |
| EVM0022402 | LG6 | hypothetical protein CICLE_v1 | not DE   | not DE   | not DE   | not DE  |
| EVM0016378 | LG6 | hypothetical protein CICLE_v1 | not DE   | not DE   | not DE   | not DE  |
| EVM0006165 | LG6 | hypothetical protein CICLE_v1 | not DE   | not DE   | not DE   | not DE  |
| EVM0012526 | LG6 | hypothetical protein CICLE_v1 | not DE   | not DE   | not DE   | not DE  |
| EVM0005608 | LG6 | hypothetical protein CICLE_v1 | not DE   | not DE   | not DE   | not DE  |
| EVM0002879 | LG6 | hypothetical protein CICLE_v1 | not DE   | not DE   | not DE   | not DE  |
| EVM0014154 | LG6 | hypothetical protein CICLE_v1 | -4.04549 | 0.015342 | -4.35951 | 0.02786 |
| EVM0012810 | LG6 | hypothetical protein CICLE_v1 | not DE   | not DE   | not DE   | not DE  |
| EVM0019481 | LG6 | hypothetical protein CICLE_v1 | not DE   | not DE   | not DE   | not DE  |
| EVM0023391 | LG6 | hypothetical protein CICLE_v1 | not DE   | not DE   | not DE   | not DE  |
| EVM0011320 | LG6 | hypothetical protein CICLE_v1 | not DE   | not DE   | not DE   | not DE  |
| EVM0008232 | LG6 | hypothetical protein CICLE_v1 | not DE   | not DE   | 7.655685 | #####   |
| EVM0004627 | LG6 | hypothetical protein CICLE_v1 | not DE   | not DE   | not DE   | not DE  |
| EVM0021138 | LG6 | hypothetical protein CICLE_v1 | 4.040821 | 2.94E-06 | not DE   | not DE  |
| EVM0018420 | LG6 | hypothetical protein CICLE_v1 | not DE   | not DE   | not DE   | not DE  |
| EVM0021941 | LG6 | hypothetical protein CICLE_v1 | not DE   | not DE   | not DE   | not DE  |
| EVM0004278 | LG6 | hypothetical protein CICLE_v1 | not DE   | not DE   | not DE   | not DE  |
| EVM0007461 | LG6 | hypothetical protein CICLE_v1 | not DE   | not DE   | not DE   | not DE  |
| EVM0023569 | LG6 | hypothetical protein CICLE_v1 | not DE   | not DE   | not DE   | not DE  |
| EVM0023016 | LG6 | hypothetical protein CICLE_v1 | not DE   | not DE   | not DE   | not DE  |
| EVM0007612 | LG6 | hypothetical protein CICLE_v1 | not DE   | not DE   | 3.081665 | 0.00476 |
| EVM0005075 | LG6 | hypothetical protein CICLE_v1 | not DE   | not DE   | not DE   | not DE  |
| EVM0001949 | LG6 | hypothetical protein CICLE_v1 | not DE   | not DE   | not DE   | not DE  |
| EVM0000068 | LG6 | hypothetical protein CICLE_v1 | not DE   | not DE   | not DE   | not DE  |
| EVM0000282 | LG6 | hypothetical protein CICLE_v1 | not DE   | not DE   | not DE   | not DE  |
| EVM0014035 | LG6 | hypothetical protein CICLE_v1 | not DE   | not DE   | not DE   | not DE  |
| EVM0021266 | LG6 | hypothetical protein CICLE_v1 | not DE   | not DE   | not DE   | not DE  |
| EVM0012629 | LG6 | hypothetical protein CICLE_v1 | not DE   | not DE   | not DE   | not DE  |
| EVM0015066 | LG6 | hypothetical protein CICLE_v1 | not DE   | not DE   | not DE   | not DE  |
| EVM0006771 | LG6 | hypothetical protein CICLE_v1 | not DE   | not DE   | not DE   | not DE  |
| EVM0018332 | LG6 | hypothetical protein CICLE_v1 | not DE   | not DE   | not DE   | not DE  |
| EVM0006345 | LG6 | hypothetical protein CICLE_v1 | not DE   | not DE   | not DE   | not DE  |
| EVM0024400 | LG6 | hypothetical protein CICLE_v1 | not DE   | not DE   | not DE   | not DE  |
| EVM0019241 | LG6 | hypothetical protein CICLE_v1 | not DE   | not DE   | not DE   | not DE  |
| EVM0006391 | LG6 | hypothetical protein CICLE_v1 | not DE   | not DE   | 1.056996 | 0.00093 |
| EVM0022910 | LG6 | hypothetical protein CICLE_v1 | not DE   | not DE   | not DE   | not DE  |
| EVM0013434 | LG6 | hypothetical protein CICLE_v1 | not DE   | not DE   | not DE   | not DE  |
| EVM0000333 | LG6 | hypothetical protein CICLE_v1 | not DE   | not DE   | not DE   | not DE  |
| EVM0012725 | LG6 | hypothetical protein CICLE_v1 | not DE   | not DE   | not DE   | not DE  |
| EVM0020739 | LG6 | hypothetical protein CICLE_v1 | not DE   | not DE   | not DE   | not DE  |
| EVM0006202 | LG6 | hypothetical protein CICLE_v1 | not DE   | not DE   | not DE   | not DE  |
| EVM0020356 | LG6 | hypothetical protein CICLE_v1 | not DE   | not DE   | not DE   | not DE  |
| EVM0022650 | LG6 | hypothetical protein CICLE_v1 | not DE   | not DE   | not DE   | not DE  |
| EVM0010613 | LG6 | hypothetical protein CICLE_v1 | not DE   | not DE   | not DE   | not DE  |
| EVM0003927 | LG6 | hypothetical protein CICLE_v1 | not DE   | not DE   | not DE   | not DE  |

|            |     |                               |          |          |          |        |
|------------|-----|-------------------------------|----------|----------|----------|--------|
| EVM0003804 | LG6 | hypothetical protein CICLE_v1 | not DE   | not DE   | not DE   | not DE |
| EVM0002786 | LG6 | hypothetical protein CICLE_v1 | not DE   | not DE   | not DE   | not DE |
| EVM0016646 | LG6 | hypothetical protein CICLE_v1 | not DE   | not DE   | not DE   | not DE |
| EVM0022123 | LG6 | hypothetical protein CICLE_v1 | not DE   | not DE   | not DE   | not DE |
| EVM0011958 | LG6 | hypothetical protein CICLE_v1 | not DE   | not DE   | not DE   | not DE |
| EVM0018439 | LG6 | hypothetical protein CICLE_v1 | not DE   | not DE   | not DE   | not DE |
| EVM0020394 | LG6 | hypothetical protein CICLE_v1 | not DE   | not DE   | not DE   | not DE |
| EVM0005756 | LG6 | hypothetical protein CICLE_v1 | not DE   | not DE   | not DE   | not DE |
| EVM0011443 | LG6 | hypothetical protein CICLE_v1 | not DE   | not DE   | not DE   | not DE |
| EVM0017438 | LG6 | hypothetical protein CICLE_v1 | not DE   | not DE   | not DE   | not DE |
| EVM0000641 | LG6 | hypothetical protein CICLE_v1 | not DE   | not DE   | not DE   | not DE |
| EVM0013923 | LG6 | hypothetical protein CICLE_v1 | not DE   | not DE   | not DE   | not DE |
| EVM0022474 | LG6 | hypothetical protein CICLE_v1 | not DE   | not DE   | not DE   | not DE |
| EVM0024264 | LG6 | hypothetical protein CICLE_v1 | not DE   | not DE   | not DE   | not DE |
| EVM0001483 | LG6 | hypothetical protein CICLE_v1 | not DE   | not DE   | not DE   | not DE |
| EVM0001773 | LG6 | hypothetical protein CICLE_v1 | not DE   | not DE   | not DE   | not DE |
| EVM0021870 | LG6 | hypothetical protein CICLE_v1 | not DE   | not DE   | not DE   | not DE |
| EVM0021480 | LG6 | hypothetical protein CICLE_v1 | 1.893484 | 0.000283 | not DE   | not DE |
| EVM0015901 | LG6 | hypothetical protein CICLE_v1 | not DE   | not DE   | not DE   | not DE |
| EVM0006076 | LG6 | hypothetical protein CICLE_v1 | not DE   | not DE   | not DE   | not DE |
| EVM0012234 | LG6 | hypothetical protein CICLE_v1 | not DE   | not DE   | not DE   | not DE |
| EVM0021456 | LG6 | hypothetical protein CICLE_v1 | not DE   | not DE   | not DE   | not DE |
| EVM0000431 | LG6 | hypothetical protein CICLE_v1 | not DE   | not DE   | not DE   | not DE |
| EVM0002305 | LG6 | hypothetical protein CICLE_v1 | not DE   | not DE   | not DE   | not DE |
| EVM0014733 | LG6 | hypothetical protein CICLE_v1 | 1.372373 | 0.023678 | not DE   | not DE |
| EVM0021477 | LG6 | hypothetical protein CICLE_v1 | not DE   | not DE   | not DE   | not DE |
| EVM0000547 | LG6 | hypothetical protein CICLE_v1 | not DE   | not DE   | not DE   | not DE |
| EVM0003341 | LG6 | hypothetical protein CICLE_v1 | not DE   | not DE   | not DE   | not DE |
| EVM0019139 | LG6 | hypothetical protein CICLE_v1 | not DE   | not DE   | not DE   | not DE |
| EVM0005529 | LG6 | hypothetical protein CICLE_v1 | not DE   | not DE   | not DE   | not DE |
| EVM0024390 | LG6 | hypothetical protein CICLE_v1 | 2.606898 | 0.014033 | not DE   | not DE |
| EVM0009216 | LG6 | hypothetical protein CICLE_v1 | not DE   | not DE   | not DE   | not DE |
| EVM0024585 | LG6 | hypothetical protein CICLE_v1 | -1.16512 | 0.041575 | not DE   | not DE |
| EVM0018387 | LG6 | hypothetical protein CICLE_v1 | not DE   | not DE   | not DE   | not DE |
| EVM0013714 | LG6 | hypothetical protein CICLE_v1 | not DE   | not DE   | not DE   | not DE |
| EVM0011614 | LG6 | hypothetical protein CICLE_v1 | not DE   | not DE   | not DE   | not DE |
| EVM0009750 | LG6 | hypothetical protein CICLE_v1 | not DE   | not DE   | not DE   | not DE |
| EVM0006513 | LG6 | hypothetical protein CICLE_v1 | not DE   | not DE   | not DE   | not DE |
| EVM0002141 | LG6 | hypothetical protein CICLE_v1 | not DE   | not DE   | not DE   | not DE |
| EVM0010392 | LG6 | hypothetical protein CICLE_v1 | not DE   | not DE   | not DE   | not DE |
| EVM0009605 | LG6 | hypothetical protein CICLE_v1 | not DE   | not DE   | not DE   | not DE |
| EVM0000856 | LG6 | hypothetical protein CICLE_v1 | not DE   | not DE   | not DE   | not DE |
| EVM0015678 | LG6 | hypothetical protein CICLE_v1 | not DE   | not DE   | not DE   | not DE |
| EVM0023599 | LG6 | hypothetical protein CICLE_v1 | not DE   | not DE   | not DE   | not DE |
| EVM0010774 | LG6 | hypothetical protein CICLE_v1 | not DE   | not DE   | not DE   | not DE |
| EVM0011351 | LG6 | hypothetical protein CICLE_v1 | not DE   | not DE   | not DE   | not DE |
| EVM0016249 | LG6 | hypothetical protein CICLE_v1 | not DE   | not DE   | not DE   | not DE |
| EVM0023227 | LG6 | hypothetical protein CICLE_v1 | not DE   | not DE   | not DE   | not DE |
| EVM0014227 | LG6 | hypothetical protein CICLE_v1 | not DE   | not DE   | not DE   | not DE |
| EVM0019588 | LG6 | hypothetical protein CISIN_1g | not DE   | not DE   | -1.22602 | #####  |
| EVM0023818 | LG6 | hypothetical protein CISIN_1g | not DE   | not DE   | not DE   | not DE |
| EVM0011063 | LG6 | hypothetical protein CISIN_1g | not DE   | not DE   | not DE   | not DE |
| EVM0005741 | LG6 | hypothetical protein CISIN_1g | not DE   | not DE   | not DE   | not DE |
| EVM0020041 | LG6 | hypothetical protein CISIN_1g | not DE   | not DE   | not DE   | not DE |

|            |     |                               |          |          |          |         |
|------------|-----|-------------------------------|----------|----------|----------|---------|
| EVM0012553 | LG6 | hypothetical protein CISIN_1g | not DE   | not DE   | not DE   | not DE  |
| EVM0011797 | LG6 | hypothetical protein CISIN_1g | not DE   | not DE   | not DE   | not DE  |
| EVM0021648 | LG6 | hypothetical protein CISIN_1g | not DE   | not DE   | not DE   | not DE  |
| EVM0020013 | LG6 | hypothetical protein CISIN_1g | not DE   | not DE   | not DE   | not DE  |
| EVM0024039 | LG6 | hypothetical protein CISIN_1g | not DE   | not DE   | not DE   | not DE  |
| EVM0024485 | LG6 | hypothetical protein CISIN_1g | not DE   | not DE   | not DE   | not DE  |
| EVM0010618 | LG6 | hypothetical protein CISIN_1g | not DE   | not DE   | not DE   | not DE  |
| EVM0023491 | LG6 | hypothetical protein CISIN_1g | not DE   | not DE   | not DE   | not DE  |
| EVM0018031 | LG6 | hypothetical protein CISIN_1g | not DE   | not DE   | not DE   | not DE  |
| EVM0011606 | LG6 | hypothetical protein CISIN_1g | not DE   | not DE   | not DE   | not DE  |
| EVM0021830 | LG6 | hypothetical protein CISIN_1g | not DE   | not DE   | not DE   | not DE  |
| EVM0013684 | LG6 | hypothetical protein CISIN_1g | not DE   | not DE   | not DE   | not DE  |
| EVM0002377 | LG6 | hypothetical protein CISIN_1g | not DE   | not DE   | not DE   | not DE  |
| EVM0024555 | LG6 | hypothetical protein CISIN_1g | not DE   | not DE   | -1.32056 | #####   |
| EVM0022934 | LG6 | hypothetical protein CISIN_1g | not DE   | not DE   | not DE   | not DE  |
| EVM0002944 | LG6 | hypothetical protein CISIN_1g | not DE   | not DE   | not DE   | not DE  |
| EVM0023159 | LG6 | hypothetical protein CISIN_1g | not DE   | not DE   | not DE   | not DE  |
| EVM0012482 | LG6 | hypothetical protein CISIN_1g | not DE   | not DE   | not DE   | not DE  |
| EVM0015498 | LG6 | hypothetical protein CISIN_1g | not DE   | not DE   | 1.040645 | 0.00778 |
| EVM0007665 | LG6 | hypothetical protein CISIN_1g | not DE   | not DE   | not DE   | not DE  |
| EVM0009414 | LG6 | hypothetical protein CISIN_1g | not DE   | not DE   | not DE   | not DE  |
| EVM0017060 | LG6 | hypothetical protein CISIN_1g | not DE   | not DE   | not DE   | not DE  |
| EVM0017187 | LG6 | hypothetical protein CISIN_1g | not DE   | not DE   | not DE   | not DE  |
| EVM0014825 | LG6 | hypothetical protein CISIN_1g | not DE   | not DE   | not DE   | not DE  |
| EVM0014403 | LG6 | hypothetical protein CISIN_1g | not DE   | not DE   | not DE   | not DE  |
| EVM0022801 | LG6 | hypothetical protein CISIN_1g | not DE   | not DE   | not DE   | not DE  |
| EVM0002321 | LG6 | hypothetical protein CISIN_1g | not DE   | not DE   | not DE   | not DE  |
| EVM0006574 | LG6 | hypothetical protein CISIN_1g | not DE   | not DE   | not DE   | not DE  |
| EVM0005052 | LG6 | hypothetical protein CISIN_1g | not DE   | not DE   | not DE   | not DE  |
| EVM0013787 | LG6 | hypothetical protein CISIN_1g | not DE   | not DE   | not DE   | not DE  |
| EVM0011381 | LG6 | hypothetical protein CISIN_1g | not DE   | not DE   | not DE   | not DE  |
| EVM0008320 | LG6 | hypothetical protein CISIN_1g | not DE   | not DE   | not DE   | not DE  |
| EVM0024059 | LG6 | hypothetical protein CISIN_1g | not DE   | not DE   | not DE   | not DE  |
| EVM0009447 | LG6 | hypothetical protein CISIN_1g | not DE   | not DE   | not DE   | not DE  |
| EVM0006150 | LG6 | hypothetical protein CISIN_1g | not DE   | not DE   | not DE   | not DE  |
| EVM0024244 | LG6 | hypothetical protein CISIN_1g | not DE   | not DE   | not DE   | not DE  |
| EVM0018241 | LG6 | hypothetical protein CISIN_1g | not DE   | not DE   | not DE   | not DE  |
| EVM0000486 | LG6 | hypothetical protein CISIN_1g | not DE   | not DE   | not DE   | not DE  |
| EVM0015411 | LG6 | hypothetical protein CISIN_1g | 2.142021 | 0.016658 | not DE   | not DE  |
| EVM0002986 | LG6 | hypothetical protein CISIN_1g | not DE   | not DE   | not DE   | not DE  |
| EVM0022001 | LG6 | hypothetical protein CISIN_1g | not DE   | not DE   | not DE   | not DE  |
| EVM0008410 | LG6 | hypothetical protein CISIN_1g | not DE   | not DE   | not DE   | not DE  |
| EVM0017837 | LG6 | hypothetical protein CISIN_1g | not DE   | not DE   | not DE   | not DE  |
| EVM0007620 | LG6 | hypothetical protein CISIN_1g | not DE   | not DE   | not DE   | not DE  |
| EVM0008054 | LG6 | hypothetical protein CISIN_1g | not DE   | not DE   | not DE   | not DE  |
| EVM0012910 | LG6 | hypothetical protein CISIN_1g | not DE   | not DE   | not DE   | not DE  |
| EVM0019016 | LG6 | hypothetical protein CISIN_1g | not DE   | not DE   | not DE   | not DE  |
| EVM0016035 | LG6 | hypothetical protein CISIN_1g | not DE   | not DE   | not DE   | not DE  |
| EVM0008370 | LG6 | hypothetical protein CISIN_1g | not DE   | not DE   | not DE   | not DE  |
| EVM0013316 | LG6 | hypothetical protein CISIN_1g | -2.96082 | 0.026437 | not DE   | not DE  |
| EVM0017033 | LG6 | hypothetical protein CISIN_1g | not DE   | not DE   | not DE   | not DE  |
| EVM0015294 | LG6 | hypothetical protein CISIN_1g | not DE   | not DE   | not DE   | not DE  |
| EVM0014111 | LG6 | hypothetical protein CISIN_1g | not DE   | not DE   | not DE   | not DE  |
| EVM0018495 | LG6 | hypothetical protein CISIN_1g | not DE   | not DE   | not DE   | not DE  |

|            |     |                               |          |          |          |         |
|------------|-----|-------------------------------|----------|----------|----------|---------|
| EVM0012020 | LG6 | hypothetical protein CISIN_1g | not DE   | not DE   | not DE   | not DE  |
| EVM0020321 | LG6 | hypothetical protein CISIN_1g | not DE   | not DE   | not DE   | not DE  |
| EVM0012630 | LG6 | hypothetical protein CISIN_1g | not DE   | not DE   | not DE   | not DE  |
| EVM0013011 | LG6 | hypothetical protein CISIN_1g | not DE   | not DE   | not DE   | not DE  |
| EVM0002020 | LG6 | hypothetical protein CISIN_1g | not DE   | not DE   | not DE   | not DE  |
| EVM0011932 | LG6 | hypothetical protein CISIN_1g | not DE   | not DE   | not DE   | not DE  |
| EVM0003072 | LG6 | hypothetical protein CISIN_1g | not DE   | not DE   | not DE   | not DE  |
| EVM0007574 | LG6 | hypothetical protein CISIN_1g | 1.278945 | 9.09E-07 | not DE   | not DE  |
| EVM0000680 | LG6 | hypothetical protein CISIN_1g | not DE   | not DE   | not DE   | not DE  |
| EVM0004379 | LG6 | hypothetical protein CISIN_1g | not DE   | not DE   | not DE   | not DE  |
| EVM0021365 | LG6 | hypothetical protein CISIN_1g | not DE   | not DE   | not DE   | not DE  |
| EVM0005399 | LG6 | hypothetical protein CISIN_1g | not DE   | not DE   | not DE   | not DE  |
| EVM0006699 | LG6 | hypothetical protein CISIN_1g | not DE   | not DE   | not DE   | not DE  |
| EVM0021088 | LG6 | hypothetical protein CISIN_1g | not DE   | not DE   | not DE   | not DE  |
| EVM0006760 | LG6 | hypothetical protein CISIN_1g | not DE   | not DE   | not DE   | not DE  |
| EVM0018678 | LG6 | hypothetical protein CISIN_1g | not DE   | not DE   | not DE   | not DE  |
| EVM0004796 | LG6 | hypothetical protein CISIN_1g | not DE   | not DE   | not DE   | not DE  |
| EVM0015905 | LG6 | hypothetical protein CISIN_1g | not DE   | not DE   | not DE   | not DE  |
| EVM0002916 | LG6 | hypothetical protein CISIN_1g | not DE   | not DE   | not DE   | not DE  |
| EVM0006813 | LG6 | hypothetical protein CISIN_1g | not DE   | not DE   | not DE   | not DE  |
| EVM0023128 | LG6 | hypothetical protein CISIN_1g | not DE   | not DE   | not DE   | not DE  |
| EVM0006903 | LG6 | hypothetical protein CISIN_1g | not DE   | not DE   | not DE   | not DE  |
| EVM0005273 | LG6 | hypothetical protein CISIN_1g | not DE   | not DE   | not DE   | not DE  |
| EVM0011761 | LG6 | hypothetical protein CISIN_1g | not DE   | not DE   | not DE   | not DE  |
| EVM0014256 | LG6 | hypothetical protein CISIN_1g | not DE   | not DE   | not DE   | not DE  |
| EVM0014663 | LG6 | hypothetical protein CISIN_1g | not DE   | not DE   | not DE   | not DE  |
| EVM0020328 | LG6 | hypothetical protein CISIN_1g | not DE   | not DE   | not DE   | not DE  |
| EVM0020455 | LG6 | hypothetical protein CISIN_1g | not DE   | not DE   | not DE   | not DE  |
| EVM0002975 | LG6 | hypothetical protein CISIN_1g | not DE   | not DE   | not DE   | not DE  |
| EVM0017956 | LG6 | hypothetical protein CISIN_1g | not DE   | not DE   | not DE   | not DE  |
| EVM0024063 | LG6 | hypothetical protein CISIN_1g | not DE   | not DE   | 1.012641 | 0.03057 |
| EVM0005619 | LG6 | hypothetical protein CISIN_1g | -5.87022 | 3.76E-17 | -1.55072 | 0.00019 |
| EVM0024323 | LG6 | hypothetical protein CISIN_1g | not DE   | not DE   | not DE   | not DE  |
| EVM0008267 | LG6 | hypothetical protein CISIN_1g | not DE   | not DE   | not DE   | not DE  |
| EVM0001178 | LG6 | hypothetical protein CISIN_1g | not DE   | not DE   | not DE   | not DE  |
| EVM0016305 | LG6 | hypothetical protein CISIN_1g | not DE   | not DE   | not DE   | not DE  |
| EVM0022311 | LG6 | hypothetical protein CISIN_1g | not DE   | not DE   | not DE   | not DE  |
| EVM0015070 | LG6 | hypothetical protein CISIN_1g | not DE   | not DE   | not DE   | not DE  |
| EVM0007233 | LG6 | hypothetical protein CISIN_1g | not DE   | not DE   | not DE   | not DE  |
| EVM0011041 | LG6 | hypothetical protein CISIN_1g | not DE   | not DE   | not DE   | not DE  |
| EVM0016220 | LG6 | hypothetical protein CISIN_1g | -1.18187 | 2.03E-07 | not DE   | not DE  |
| EVM0021505 | LG6 | hypothetical protein CISIN_1g | not DE   | not DE   | not DE   | not DE  |
| EVM0007071 | LG6 | hypothetical protein CISIN_1g | not DE   | not DE   | not DE   | not DE  |
| EVM0008768 | LG6 | hypothetical protein CISIN_1g | not DE   | not DE   | not DE   | not DE  |
| EVM0006917 | LG6 | hypothetical protein CISIN_1g | not DE   | not DE   | not DE   | not DE  |
| EVM0014804 | LG6 | hypothetical protein CISIN_1g | not DE   | not DE   | not DE   | not DE  |
| EVM0012458 | LG6 | hypothetical protein CISIN_1g | not DE   | not DE   | not DE   | not DE  |
| EVM0024470 | LG6 | hypothetical protein CISIN_1g | not DE   | not DE   | not DE   | not DE  |
| EVM0017741 | LG6 | hypothetical protein CISIN_1g | not DE   | not DE   | not DE   | not DE  |
| EVM0022955 | LG6 | hypothetical protein CISIN_1g | not DE   | not DE   | not DE   | not DE  |
| EVM0011695 | LG6 | hypothetical protein CISIN_1g | not DE   | not DE   | not DE   | not DE  |
| EVM0014832 | LG6 | hypothetical protein CISIN_1g | not DE   | not DE   | not DE   | not DE  |
| EVM0018468 | LG6 | hypothetical protein CISIN_1g | not DE   | not DE   | not DE   | not DE  |
| EVM0011044 | LG6 | hypothetical protein CISIN_1g | not DE   | not DE   | not DE   | not DE  |

|            |     |                               |          |          |          |         |
|------------|-----|-------------------------------|----------|----------|----------|---------|
| EVM0007287 | LG6 | hypothetical protein CISIN_1g | not DE   | not DE   | not DE   | not DE  |
| EVM0006655 | LG6 | hypothetical protein CISIN_1g | not DE   | not DE   | not DE   | not DE  |
| EVM0018555 | LG6 | hypothetical protein CISIN_1g | not DE   | not DE   | not DE   | not DE  |
| EVM0016706 | LG6 | hypothetical protein CISIN_1g | not DE   | not DE   | not DE   | not DE  |
| EVM0019852 | LG6 | hypothetical protein CISIN_1g | not DE   | not DE   | not DE   | not DE  |
| EVM0013609 | LG6 | hypothetical protein CISIN_1g | not DE   | not DE   | not DE   | not DE  |
| EVM0011645 | LG6 | hypothetical protein CISIN_1g | not DE   | not DE   | not DE   | not DE  |
| EVM0019916 | LG6 | hypothetical protein CISIN_1g | not DE   | not DE   | not DE   | not DE  |
| EVM0021308 | LG6 | hypothetical protein CISIN_1g | not DE   | not DE   | not DE   | not DE  |
| EVM0010940 | LG6 | hypothetical protein CISIN_1g | not DE   | not DE   | not DE   | not DE  |
| EVM0022527 | LG6 | hypothetical protein CISIN_1g | not DE   | not DE   | not DE   | not DE  |
| EVM0003690 | LG6 | hypothetical protein CISIN_1g | not DE   | not DE   | not DE   | not DE  |
| EVM0009399 | LG6 | hypothetical protein CISIN_1g | not DE   | not DE   | not DE   | not DE  |
| EVM0022645 | LG6 | hypothetical protein CISIN_1g | not DE   | not DE   | not DE   | not DE  |
| EVM0012098 | LG6 | hypothetical protein CISIN_1g | not DE   | not DE   | not DE   | not DE  |
| EVM0014937 | LG6 | hypothetical protein CISIN_1g | not DE   | not DE   | not DE   | not DE  |
| EVM0009292 | LG6 | hypothetical protein CISIN_1g | not DE   | not DE   | not DE   | not DE  |
| EVM0022601 | LG6 | hypothetical protein CISIN_1g | not DE   | not DE   | not DE   | not DE  |
| EVM0015815 | LG6 | hypothetical protein CISIN_1g | not DE   | not DE   | not DE   | not DE  |
| EVM0020758 | LG6 | hypothetical protein CISIN_1g | not DE   | not DE   | 1.287583 | 0.00524 |
| EVM0017163 | LG6 | hypothetical protein CISIN_1g | not DE   | not DE   | not DE   | not DE  |
| EVM0002749 | LG6 | hypothetical protein CISIN_1g | not DE   | not DE   | not DE   | not DE  |
| EVM0021552 | LG6 | hypothetical protein CISIN_1g | not DE   | not DE   | not DE   | not DE  |
| EVM0019758 | LG6 | hypothetical protein CISIN_1g | not DE   | not DE   | 1.010193 | 0.00089 |
| EVM0011481 | LG6 | hypothetical protein CISIN_1g | not DE   | not DE   | not DE   | not DE  |
| EVM0014792 | LG6 | hypothetical protein CISIN_1g | not DE   | not DE   | not DE   | not DE  |
| EVM0018681 | LG6 | hypothetical protein CISIN_1g | not DE   | not DE   | not DE   | not DE  |
| EVM0005518 | LG6 | hypothetical protein CISIN_1g | not DE   | not DE   | not DE   | not DE  |
| EVM0021267 | LG6 | hypothetical protein CISIN_1g | not DE   | not DE   | not DE   | not DE  |
| EVM0010026 | LG6 | hypothetical protein CISIN_1g | not DE   | not DE   | not DE   | not DE  |
| EVM0012908 | LG6 | hypothetical protein CISIN_1g | not DE   | not DE   | not DE   | not DE  |
| EVM0012223 | LG6 | hypothetical protein CISIN_1g | not DE   | not DE   | not DE   | not DE  |
| EVM0006906 | LG6 | hypothetical protein CISIN_1g | not DE   | not DE   | not DE   | not DE  |
| EVM0024020 | LG6 | hypothetical protein CISIN_1g | not DE   | not DE   | not DE   | not DE  |
| EVM0008911 | LG6 | hypothetical protein CISIN_1g | not DE   | not DE   | not DE   | not DE  |
| EVM0009614 | LG6 | hypothetical protein CISIN_1g | not DE   | not DE   | not DE   | not DE  |
| EVM0022679 | LG6 | hypothetical protein CISIN_1g | 1.273251 | 0.00018  | not DE   | not DE  |
| EVM0004752 | LG6 | hypothetical protein CISIN_1g | not DE   | not DE   | not DE   | not DE  |
| EVM0003046 | LG6 | hypothetical protein CISIN_1g | not DE   | not DE   | not DE   | not DE  |
| EVM0004905 | LG6 | hypothetical protein CISIN_1g | not DE   | not DE   | not DE   | not DE  |
| EVM0008837 | LG6 | hypothetical protein CISIN_1g | not DE   | not DE   | not DE   | not DE  |
| EVM0022927 | LG6 | hypothetical protein CISIN_1g | not DE   | not DE   | not DE   | not DE  |
| EVM0003189 | LG6 | hypothetical protein CISIN_1g | not DE   | not DE   | not DE   | not DE  |
| EVM0015836 | LG6 | hypothetical protein CISIN_1g | not DE   | not DE   | not DE   | not DE  |
| EVM0012138 | LG6 | hypothetical protein CISIN_1g | -1.44844 | 0.037412 | not DE   | not DE  |
| EVM0019214 | LG6 | hypothetical protein CISIN_1g | not DE   | not DE   | not DE   | not DE  |
| EVM0016889 | LG6 | hypothetical protein CISIN_1g | not DE   | not DE   | not DE   | not DE  |
| EVM0000932 | LG6 | hypothetical protein CISIN_1g | not DE   | not DE   | not DE   | not DE  |
| EVM0011349 | LG6 | hypothetical protein CISIN_1g | not DE   | not DE   | not DE   | not DE  |
| EVM0016663 | LG6 | hypothetical protein CISIN_1g | not DE   | not DE   | not DE   | not DE  |
| EVM0007809 | LG6 | hypothetical protein CISIN_1g | not DE   | not DE   | not DE   | not DE  |
| EVM0001195 | LG6 | hypothetical protein CISIN_1g | not DE   | not DE   | not DE   | not DE  |
| EVM0003024 | LG6 | hypothetical protein CISIN_1g | not DE   | not DE   | not DE   | not DE  |
| EVM0008385 | LG6 | hypothetical protein CISIN_1g | not DE   | not DE   | not DE   | not DE  |



|            |     |                               |          |          |          |        |
|------------|-----|-------------------------------|----------|----------|----------|--------|
| EVM0002046 | LG6 | hypothetical protein CISIN_1g | not DE   | not DE   | not DE   | not DE |
| EVM0001760 | LG6 | hypothetical protein CISIN_1g | 1.242173 | 0.019245 | 1.491178 | #####  |
| EVM0022612 | LG6 | hypothetical protein CISIN_1g | not DE   | not DE   | not DE   | not DE |
| EVM0009885 | LG6 | hypothetical protein CISIN_1g | not DE   | not DE   | not DE   | not DE |
| EVM0014201 | LG6 | hypothetical protein CISIN_1g | not DE   | not DE   | not DE   | not DE |
| EVM0023112 | LG6 | hypothetical protein CISIN_1g | not DE   | not DE   | not DE   | not DE |
| EVM0007932 | LG6 | hypothetical protein CISIN_1g | not DE   | not DE   | not DE   | not DE |
| EVM0009200 | LG6 | hypothetical protein Csa_2G43 | not DE   | not DE   | not DE   | not DE |
| EVM0013297 | LG6 | hypothetical protein Csa_6G51 | not DE   | not DE   | not DE   | not DE |
| EVM0015450 | LG6 | hypothetical protein EUGRSUZ_ | not DE   | not DE   | not DE   | not DE |
| EVM0020536 | LG6 | hypothetical protein EUGRSUZ_ | not DE   | not DE   | not DE   | not DE |
| EVM0013524 | LG6 | hypothetical protein F383_027 | not DE   | not DE   | not DE   | not DE |
| EVM0006071 | LG6 | hypothetical protein F383_077 | not DE   | not DE   | not DE   | not DE |
| EVM0000783 | LG6 | hypothetical protein F383_092 | not DE   | not DE   | not DE   | not DE |
| EVM0006112 | LG6 | hypothetical protein F383_164 | not DE   | not DE   | not DE   | not DE |
| EVM0000492 | LG6 | hypothetical protein F383_322 | not DE   | not DE   | not DE   | not DE |
| EVM0008445 | LG6 | hypothetical protein F383_322 | not DE   | not DE   | not DE   | not DE |
| EVM0009056 | LG6 | hypothetical protein JCGZ_005 | not DE   | not DE   | not DE   | not DE |
| EVM0016879 | LG6 | hypothetical protein JCGZ_005 | not DE   | not DE   | not DE   | not DE |
| EVM0020999 | LG6 | hypothetical protein JCGZ_005 | not DE   | not DE   | not DE   | not DE |
| EVM0021902 | LG6 | hypothetical protein JCGZ_005 | not DE   | not DE   | not DE   | not DE |
| EVM0002274 | LG6 | hypothetical protein JCGZ_027 | not DE   | not DE   | not DE   | not DE |
| EVM0018895 | LG6 | hypothetical protein JCGZ_027 | not DE   | not DE   | not DE   | not DE |
| EVM0005815 | LG6 | hypothetical protein JCGZ_027 | not DE   | not DE   | 2.038404 | #####  |
| EVM0006080 | LG6 | hypothetical protein JCGZ_027 | not DE   | not DE   | not DE   | not DE |
| EVM0024291 | LG6 | hypothetical protein JCGZ_051 | not DE   | not DE   | not DE   | not DE |
| EVM0019523 | LG6 | hypothetical protein JCGZ_062 | not DE   | not DE   | not DE   | not DE |
| EVM0020600 | LG6 | hypothetical protein JCGZ_072 | not DE   | not DE   | not DE   | not DE |
| EVM0023338 | LG6 | hypothetical protein JCGZ_073 | not DE   | not DE   | not DE   | not DE |
| EVM0019581 | LG6 | hypothetical protein JCGZ_073 | not DE   | not DE   | not DE   | not DE |
| EVM0022122 | LG6 | hypothetical protein JCGZ_073 | not DE   | not DE   | not DE   | not DE |
| EVM0004746 | LG6 | hypothetical protein JCGZ_073 | not DE   | not DE   | not DE   | not DE |
| EVM0014390 | LG6 | hypothetical protein JCGZ_073 | not DE   | not DE   | not DE   | not DE |
| EVM0021350 | LG6 | hypothetical protein JCGZ_074 | not DE   | not DE   | not DE   | not DE |
| EVM0008046 | LG6 | hypothetical protein JCGZ_074 | not DE   | not DE   | not DE   | not DE |
| EVM0012340 | LG6 | hypothetical protein JCGZ_074 | not DE   | not DE   | not DE   | not DE |
| EVM0023429 | LG6 | hypothetical protein JCGZ_075 | not DE   | not DE   | not DE   | not DE |
| EVM0008135 | LG6 | hypothetical protein JCGZ_076 | not DE   | not DE   | not DE   | not DE |
| EVM0003679 | LG6 | hypothetical protein JCGZ_076 | -1.29199 | 0.003274 | not DE   | not DE |
| EVM0005036 | LG6 | hypothetical protein JCGZ_089 | not DE   | not DE   | not DE   | not DE |
| EVM0005062 | LG6 | hypothetical protein JCGZ_103 | not DE   | not DE   | not DE   | not DE |
| EVM0024043 | LG6 | hypothetical protein JCGZ_103 | not DE   | not DE   | not DE   | not DE |
| EVM0009248 | LG6 | hypothetical protein JCGZ_129 | not DE   | not DE   | not DE   | not DE |
| EVM0008179 | LG6 | hypothetical protein JCGZ_132 | not DE   | not DE   | not DE   | not DE |
| EVM0001641 | LG6 | hypothetical protein JCGZ_136 | not DE   | not DE   | not DE   | not DE |
| EVM0023281 | LG6 | hypothetical protein JCGZ_144 | not DE   | not DE   | not DE   | not DE |
| EVM0001935 | LG6 | hypothetical protein JCGZ_152 | not DE   | not DE   | 1.168161 | #####  |
| EVM0011321 | LG6 | hypothetical protein JCGZ_180 | not DE   | not DE   | not DE   | not DE |
| EVM0007303 | LG6 | hypothetical protein JCGZ_180 | not DE   | not DE   | not DE   | not DE |
| EVM0000582 | LG6 | hypothetical protein JCGZ_198 | not DE   | not DE   | not DE   | not DE |
| EVM0011228 | LG6 | hypothetical protein JCGZ_198 | not DE   | not DE   | not DE   | not DE |
| EVM0000367 | LG6 | hypothetical protein JCGZ_199 | not DE   | not DE   | not DE   | not DE |
| EVM0016391 | LG6 | hypothetical protein JCGZ_199 | not DE   | not DE   | not DE   | not DE |
| EVM0023899 | LG6 | hypothetical protein JCGZ_231 | 1.350663 | 0.026437 | not DE   | not DE |

|            |     |                               |          |          |          |        |
|------------|-----|-------------------------------|----------|----------|----------|--------|
| EVM0018159 | LG6 | hypothetical protein JCGZ_231 | not DE   | not DE   | not DE   | not DE |
| EVM0023504 | LG6 | hypothetical protein JCGZ_233 | not DE   | not DE   | not DE   | not DE |
| EVM0020630 | LG6 | hypothetical protein JCGZ_234 | not DE   | not DE   | not DE   | not DE |
| EVM0022654 | LG6 | hypothetical protein JCGZ_234 | not DE   | not DE   | not DE   | not DE |
| EVM0014894 | LG6 | hypothetical protein JCGZ_234 | not DE   | not DE   | not DE   | not DE |
| EVM0003808 | LG6 | hypothetical protein JCGZ_235 | not DE   | not DE   | not DE   | not DE |
| EVM0021522 | LG6 | hypothetical protein L484_005 | not DE   | not DE   | not DE   | not DE |
| EVM0014103 | LG6 | hypothetical protein L484_006 | not DE   | not DE   | not DE   | not DE |
| EVM0020237 | LG6 | hypothetical protein L484_010 | not DE   | not DE   | not DE   | not DE |
| EVM0020496 | LG6 | hypothetical protein L484_010 | -2.29984 | 0.000654 | not DE   | not DE |
| EVM0010438 | LG6 | hypothetical protein L484_012 | not DE   | not DE   | not DE   | not DE |
| EVM0006447 | LG6 | hypothetical protein L484_013 | not DE   | not DE   | not DE   | not DE |
| EVM0005255 | LG6 | hypothetical protein MIMGU_mg | not DE   | not DE   | not DE   | not DE |
| EVM0017682 | LG6 | hypothetical protein PHAVU_00 | not DE   | not DE   | not DE   | not DE |
| EVM0016267 | LG6 | hypothetical protein PHAVU_00 | not DE   | not DE   | not DE   | not DE |
| EVM0012886 | LG6 | hypothetical protein PHAVU_00 | not DE   | not DE   | not DE   | not DE |
| EVM0010595 | LG6 | hypothetical protein PHAVU_00 | not DE   | not DE   | not DE   | not DE |
| EVM0011685 | LG6 | hypothetical protein PHAVU_00 | not DE   | not DE   | not DE   | not DE |
| EVM0000245 | LG6 | hypothetical protein PHAVU_01 | not DE   | not DE   | not DE   | not DE |
| EVM0003059 | LG6 | hypothetical protein POPTR_00 | not DE   | not DE   | not DE   | not DE |
| EVM0020379 | LG6 | hypothetical protein POPTR_00 | not DE   | not DE   | not DE   | not DE |
| EVM0013930 | LG6 | hypothetical protein POPTR_00 | not DE   | not DE   | 1.667881 | #####  |
| EVM0001357 | LG6 | hypothetical protein POPTR_00 | not DE   | not DE   | not DE   | not DE |
| EVM0007995 | LG6 | hypothetical protein POPTR_00 | not DE   | not DE   | not DE   | not DE |
| EVM0018735 | LG6 | hypothetical protein POPTR_00 | not DE   | not DE   | not DE   | not DE |
| EVM0012548 | LG6 | hypothetical protein POPTR_00 | not DE   | not DE   | not DE   | not DE |
| EVM0006977 | LG6 | hypothetical protein POPTR_00 | not DE   | not DE   | not DE   | not DE |
| EVM0002579 | LG6 | hypothetical protein POPTR_00 | not DE   | not DE   | not DE   | not DE |
| EVM0023107 | LG6 | hypothetical protein POPTR_00 | not DE   | not DE   | not DE   | not DE |
| EVM0008182 | LG6 | hypothetical protein POPTR_00 | not DE   | not DE   | not DE   | not DE |
| EVM0003612 | LG6 | hypothetical protein POPTR_00 | not DE   | not DE   | not DE   | not DE |
| EVM0005965 | LG6 | hypothetical protein POPTR_00 | not DE   | not DE   | not DE   | not DE |
| EVM0015977 | LG6 | hypothetical protein POPTR_00 | not DE   | not DE   | not DE   | not DE |
| EVM0024653 | LG6 | hypothetical protein POPTR_00 | not DE   | not DE   | not DE   | not DE |
| EVM0004908 | LG6 | hypothetical protein POPTR_00 | not DE   | not DE   | not DE   | not DE |
| EVM0014371 | LG6 | hypothetical protein POPTR_00 | not DE   | not DE   | not DE   | not DE |
| EVM0009909 | LG6 | hypothetical protein POPTR_00 | not DE   | not DE   | not DE   | not DE |
| EVM0006466 | LG6 | hypothetical protein POPTR_00 | not DE   | not DE   | not DE   | not DE |
| EVM0022207 | LG6 | hypothetical protein POPTR_00 | not DE   | not DE   | not DE   | not DE |
| EVM0008777 | LG6 | hypothetical protein POPTR_00 | not DE   | not DE   | not DE   | not DE |
| EVM0003068 | LG6 | hypothetical protein POPTR_00 | not DE   | not DE   | not DE   | not DE |
| EVM0004954 | LG6 | hypothetical protein POPTR_00 | not DE   | not DE   | not DE   | not DE |
| EVM0005181 | LG6 | hypothetical protein POPTR_00 | not DE   | not DE   | not DE   | not DE |
| EVM0013072 | LG6 | hypothetical protein POPTR_00 | not DE   | not DE   | not DE   | not DE |
| EVM0014614 | LG6 | hypothetical protein POPTR_00 | not DE   | not DE   | not DE   | not DE |
| EVM0016140 | LG6 | hypothetical protein POPTR_00 | not DE   | not DE   | not DE   | not DE |
| EVM0011034 | LG6 | hypothetical protein POPTR_00 | not DE   | not DE   | not DE   | not DE |
| EVM0016607 | LG6 | hypothetical protein POPTR_00 | not DE   | not DE   | not DE   | not DE |
| EVM0008066 | LG6 | hypothetical protein POPTR_00 | not DE   | not DE   | not DE   | not DE |
| EVM0005080 | LG6 | hypothetical protein POPTR_00 | not DE   | not DE   | not DE   | not DE |
| EVM0002439 | LG6 | hypothetical protein POPTR_00 | not DE   | not DE   | not DE   | not DE |
| EVM0011580 | LG6 | hypothetical protein POPTR_00 | not DE   | not DE   | not DE   | not DE |
| EVM0017905 | LG6 | hypothetical protein POPTR_00 | not DE   | not DE   | not DE   | not DE |
| EVM0022528 | LG6 | hypothetical protein POPTR_00 | not DE   | not DE   | not DE   | not DE |

|            |     |                               |          |          |          |         |
|------------|-----|-------------------------------|----------|----------|----------|---------|
| EVM0018230 | LG6 | hypothetical protein POPTR_00 | not DE   | not DE   | not DE   | not DE  |
| EVM0006124 | LG6 | hypothetical protein POPTR_00 | not DE   | not DE   | 2.128504 | 0.03857 |
| EVM0009005 | LG6 | hypothetical protein POPTR_00 | not DE   | not DE   | not DE   | not DE  |
| EVM0003304 | LG6 | hypothetical protein POPTR_00 | not DE   | not DE   | not DE   | not DE  |
| EVM0011525 | LG6 | hypothetical protein POPTR_00 | not DE   | not DE   | not DE   | not DE  |
| EVM0010865 | LG6 | hypothetical protein PRUPE_pp | not DE   | not DE   | -1.28086 | #####   |
| EVM0021342 | LG6 | hypothetical protein PRUPE_pp | not DE   | not DE   | not DE   | not DE  |
| EVM0012266 | LG6 | hypothetical protein PRUPE_pp | not DE   | not DE   | not DE   | not DE  |
| EVM0001153 | LG6 | hypothetical protein PRUPE_pp | not DE   | not DE   | not DE   | not DE  |
| EVM0024345 | LG6 | hypothetical protein PRUPE_pp | not DE   | not DE   | not DE   | not DE  |
| EVM0004597 | LG6 | hypothetical protein PRUPE_pp | not DE   | not DE   | not DE   | not DE  |
| EVM0012023 | LG6 | hypothetical protein PRUPE_pp | 2.775971 | 0.018515 | not DE   | not DE  |
| EVM0007210 | LG6 | hypothetical protein PRUPE_pp | -3.10446 | 3.11E-05 | not DE   | not DE  |
| EVM0020776 | LG6 | hypothetical protein PRUPE_pp | not DE   | not DE   | not DE   | not DE  |
| EVM0005846 | LG6 | hypothetical protein PRUPE_pp | 2.626298 | 0.000457 | 2.682117 | #####   |
| EVM0018457 | LG6 | hypothetical protein PRUPE_pp | not DE   | not DE   | not DE   | not DE  |
| EVM0001894 | LG6 | hypothetical protein PRUPE_pp | not DE   | not DE   | 1.76871  | 0.04106 |
| EVM0017718 | LG6 | hypothetical protein PRUPE_pp | not DE   | not DE   | not DE   | not DE  |
| EVM0000591 | LG6 | hypothetical protein PRUPE_pp | not DE   | not DE   | not DE   | not DE  |
| EVM0021420 | LG6 | hypothetical protein PRUPE_pp | not DE   | not DE   | not DE   | not DE  |
| EVM0005682 | LG6 | hypothetical protein PRUPE_pp | not DE   | not DE   | not DE   | not DE  |
| EVM0018567 | LG6 | hypothetical protein PRUPE_pp | not DE   | not DE   | not DE   | not DE  |
| EVM0013903 | LG6 | hypothetical protein PRUPE_pp | not DE   | not DE   | not DE   | not DE  |
| EVM0007715 | LG6 | hypothetical protein RCOM_086 | not DE   | not DE   | not DE   | not DE  |
| EVM0012396 | LG6 | hypothetical protein RCOM_086 | not DE   | not DE   | not DE   | not DE  |
| EVM0000528 | LG6 | hypothetical protein RCOM_104 | not DE   | not DE   | not DE   | not DE  |
| EVM0011040 | LG6 | hypothetical protein RCOM_143 | not DE   | not DE   | not DE   | not DE  |
| EVM0016826 | LG6 | hypothetical protein VITISV_0 | not DE   | not DE   | not DE   | not DE  |
| EVM0012251 | LG6 | hypothetical protein VITISV_0 | 1.43285  | 0.045149 | not DE   | not DE  |
| EVM0014835 | LG6 | hypothetical protein VITISV_0 | not DE   | not DE   | not DE   | not DE  |
| EVM0014279 | LG6 | hypothetical protein VITISV_0 | not DE   | not DE   | not DE   | not DE  |
| EVM0005355 | LG6 | hypothetical protein VITISV_0 | not DE   | not DE   | not DE   | not DE  |
| EVM0023366 | LG6 | hypothetical protein VITISV_0 | not DE   | not DE   | not DE   | not DE  |
| EVM0013761 | LG6 | hypothetical protein VITISV_0 | not DE   | not DE   | not DE   | not DE  |
| EVM0017633 | LG6 | hypothetical protein VITISV_0 | not DE   | not DE   | not DE   | not DE  |
| EVM0010724 | LG6 | hypothetical protein VITISV_0 | not DE   | not DE   | not DE   | not DE  |
| EVM0007251 | LG6 | hypothetical protein VITISV_0 | not DE   | not DE   | not DE   | not DE  |
| EVM0008329 | LG6 | hypothetical protein VITISV_0 | not DE   | not DE   | not DE   | not DE  |
| EVM0014532 | LG6 | hypothetical protein VITISV_0 | not DE   | not DE   | not DE   | not DE  |
| EVM0022521 | LG6 | hypothetical protein VITISV_0 | not DE   | not DE   | not DE   | not DE  |
| EVM0000604 | LG6 | hypothetical protein VITISV_0 | not DE   | not DE   | not DE   | not DE  |
| EVM0003967 | LG6 | hypothetical protein VITISV_0 | not DE   | not DE   | not DE   | not DE  |
| EVM0001626 | LG6 | hypothetical protein VITISV_0 | not DE   | not DE   | not DE   | not DE  |
| EVM0002806 | LG6 | hypothetical protein VITISV_0 | not DE   | not DE   | not DE   | not DE  |
| EVM0023823 | LG6 | hypothetical protein VITISV_0 | not DE   | not DE   | not DE   | not DE  |
| EVM0011004 | LG6 | hypothetical protein ZEAMMB73 | not DE   | not DE   | 1.047758 | 0.01367 |
| EVM0013672 | LG6 | integrase                     | not DE   | not DE   | not DE   | not DE  |
| EVM0015846 | LG6 | integrase                     | not DE   | not DE   | not DE   | not DE  |
| EVM0024437 | LG6 | integrase                     | not DE   | not DE   | not DE   | not DE  |
| EVM0020319 | LG6 | kinase family protein         | not DE   | not DE   | not DE   | not DE  |
| EVM0013219 | LG6 | leafy cotyledon1-like protein | not DE   | not DE   | not DE   | not DE  |
| EVM0010735 | LG6 | leucine-rich repeat receptor  | not DE   | not DE   | not DE   | not DE  |
| EVM0015386 | LG6 | lung seven transmembrane rece | not DE   | not DE   | not DE   | not DE  |
| EVM0001264 | LG6 | maternal effect embryo arrest | not DE   | not DE   | 1.506932 | 0.00064 |

|            |     |                               |          |          |          |         |
|------------|-----|-------------------------------|----------|----------|----------|---------|
| EVM0001089 | LG6 | maternal effect embryo arrest | not DE   | not DE   | not DE   | not DE  |
| EVM0001629 | LG6 | maternal effect embryo arrest | not DE   | not DE   | not DE   | not DE  |
| EVM0021008 | LG6 | maternal effect embryo arrest | not DE   | not DE   | not DE   | not DE  |
| EVM0024171 | LG6 | multidrug resistance pump, pu | not DE   | not DE   | not DE   | not DE  |
| EVM0011839 | LG6 | orf101b (mitochondrion)       | not DE   | not DE   | not DE   | not DE  |
| EVM0019855 | LG6 | phosphofructokinase           | not DE   | not DE   | not DE   | not DE  |
| EVM0013939 | LG6 | phospholipase D               | 4.541867 | 3.90E-05 | not DE   | not DE  |
| EVM0008034 | LG6 | phytochrome A                 | not DE   | not DE   | not DE   | not DE  |
| EVM0013827 | LG6 | plastid acyl-ACP thioesterase | not DE   | not DE   | not DE   | not DE  |
| EVM0007622 | LG6 | pollen Ole e 1 allergen and e | not DE   | not DE   | not DE   | not DE  |
| EVM0001401 | LG6 | protein phosphatase-2c, putat | not DE   | not DE   | not DE   | not DE  |
| EVM0014930 | LG6 | putative -like protein        | not DE   | not DE   | not DE   | not DE  |
| EVM0022428 | LG6 | putative L-galactose-1-phosph | not DE   | not DE   | 1.330107 | 0.04151 |
| EVM0012534 | LG6 | retrotransposon protein, puta | not DE   | not DE   | not DE   | not DE  |
| EVM0018522 | LG6 | ribosomal protein L32 (chloro | not DE   | not DE   | not DE   | not DE  |
| EVM0011405 | LG6 | short-chain dehydrogenase/red | not DE   | not DE   | not DE   | not DE  |
| EVM0011961 | LG6 | stress-induced hydrophobic pe | not DE   | not DE   | 1.452411 | 0.01112 |
| EVM0008688 | LG6 | sugar transporter, putative   | not DE   | not DE   | not DE   | not DE  |
| EVM0009274 | LG6 | sugar transporter, putative   | not DE   | not DE   | not DE   | not DE  |
| EVM0010678 | LG6 | sugar transporter, putative   | 3.557938 | 0.037014 | not DE   | not DE  |
| EVM0018954 | LG6 | terminal flower 2-1           | not DE   | not DE   | not DE   | not DE  |
| EVM0021035 | LG6 | tonoplast dicarboxylate trans | not DE   | not DE   | not DE   | not DE  |
| EVM0014577 | LG6 | transposase                   | not DE   | not DE   | not DE   | not DE  |
| EVM0018926 | LG6 | uncharacterized protein LOC10 | not DE   | not DE   | not DE   | not DE  |
| EVM0001310 | LG6 | uncharacterized protein LOC10 | not DE   | not DE   | not DE   | not DE  |
| EVM0000991 | LG6 | unknown protein               | not DE   | not DE   | not DE   | not DE  |
| EVM0002611 | LG6 | unknown protein               | not DE   | not DE   | 5.908348 | 0.00251 |
| EVM0003415 | LG6 | unknown protein               | not DE   | not DE   | not DE   | not DE  |
| EVM0003421 | LG6 | unknown protein               | not DE   | not DE   | not DE   | not DE  |
| EVM0003427 | LG6 | unknown protein               | not DE   | not DE   | not DE   | not DE  |
| EVM0003450 | LG6 | unknown protein               | 2.456033 | 0.001553 | not DE   | not DE  |
| EVM0003580 | LG6 | unknown protein               | not DE   | not DE   | not DE   | not DE  |
| EVM0003874 | LG6 | unknown protein               | not DE   | not DE   | not DE   | not DE  |
| EVM0005139 | LG6 | unknown protein               | not DE   | not DE   | not DE   | not DE  |
| EVM0008478 | LG6 | unknown protein               | not DE   | not DE   | not DE   | not DE  |
| EVM0009781 | LG6 | unknown protein               | not DE   | not DE   | not DE   | not DE  |
| EVM0010675 | LG6 | unknown protein               | not DE   | not DE   | not DE   | not DE  |
| EVM0011010 | LG6 | unknown protein               | not DE   | not DE   | not DE   | not DE  |
| EVM0011166 | LG6 | unknown protein               | not DE   | not DE   | not DE   | not DE  |
| EVM0014205 | LG6 | unknown protein               | not DE   | not DE   | not DE   | not DE  |
| EVM0016728 | LG6 | unknown protein               | not DE   | not DE   | not DE   | not DE  |
| EVM0016839 | LG6 | unknown protein               | not DE   | not DE   | not DE   | not DE  |
| EVM0017705 | LG6 | unknown protein               | not DE   | not DE   | not DE   | not DE  |
| EVM0018164 | LG6 | unknown protein               | not DE   | not DE   | not DE   | not DE  |
| EVM0018621 | LG6 | unknown protein               | not DE   | not DE   | not DE   | not DE  |
| EVM0018824 | LG6 | unknown protein               | not DE   | not DE   | not DE   | not DE  |
| EVM0019453 | LG6 | unknown protein               | not DE   | not DE   | not DE   | not DE  |
| EVM0020051 | LG6 | unknown protein               | not DE   | not DE   | not DE   | not DE  |
| EVM0021430 | LG6 | unknown protein               | not DE   | not DE   | not DE   | not DE  |
| EVM0021730 | LG6 | unknown protein               | not DE   | not DE   | not DE   | not DE  |
| EVM0022179 | LG6 | unknown protein               | not DE   | not DE   | not DE   | not DE  |
| EVM0022777 | LG6 | unknown protein               | not DE   | not DE   | not DE   | not DE  |
| EVM0023962 | LG6 | unknown protein               | not DE   | not DE   | not DE   | not DE  |
| EVM0024024 | LG6 | unknown protein               | not DE   | not DE   | not DE   | not DE  |

|            |     |                                   |          |          |          |         |
|------------|-----|-----------------------------------|----------|----------|----------|---------|
| EVM0024424 | LG6 | unknown protein                   | not DE   | not DE   | not DE   | not DE  |
| EVM0001697 | LG6 | unnamed protein product           | not DE   | not DE   | not DE   | not DE  |
| EVM0001996 | LG6 | unnamed protein product           | not DE   | not DE   | not DE   | not DE  |
| EVM0002989 | LG6 | unnamed protein product           | not DE   | not DE   | not DE   | not DE  |
| EVM0005805 | LG6 | unnamed protein product           | not DE   | not DE   | not DE   | not DE  |
| EVM0011236 | LG6 | unnamed protein product           | not DE   | not DE   | not DE   | not DE  |
| EVM0012676 | LG6 | unnamed protein product           | not DE   | not DE   | not DE   | not DE  |
| EVM0012730 | LG6 | unnamed protein product           | not DE   | not DE   | not DE   | not DE  |
| EVM0014312 | LG6 | unnamed protein product           | not DE   | not DE   | not DE   | not DE  |
| EVM0014519 | LG6 | unnamed protein product           | not DE   | not DE   | not DE   | not DE  |
| EVM0015342 | LG6 | unnamed protein product           | not DE   | not DE   | not DE   | not DE  |
| EVM0015504 | LG6 | unnamed protein product           | not DE   | not DE   | not DE   | not DE  |
| EVM0016912 | LG6 | unnamed protein product           | not DE   | not DE   | not DE   | not DE  |
| EVM0018708 | LG6 | unnamed protein product           | not DE   | not DE   | not DE   | not DE  |
| EVM0019937 | LG6 | unnamed protein product           | not DE   | not DE   | not DE   | not DE  |
| EVM0020580 | LG6 | unnamed protein product           | not DE   | not DE   | not DE   | not DE  |
| EVM0022393 | LG6 | unnamed protein product           | not DE   | not DE   | not DE   | not DE  |
| EVM0015623 | LG6 | vacuolar malate transmembrane     | not DE   | not DE   | not DE   | not DE  |
| EVM0017579 | LG6 | zeta-carotene desaturase          | not DE   | not DE   | not DE   | not DE  |
| EVM0006877 | LG7 | 1-acyl-sn-glycerol-3-phosphatidyl | not DE   | not DE   | not DE   | not DE  |
| EVM0013394 | LG7 | 125 kDa kinesin-related protein   | not DE   | not DE   | not DE   | not DE  |
| EVM0023522 | LG7 | 2-methylacyl-CoA dehydrogenase    | not DE   | not DE   | not DE   | not DE  |
| EVM0017480 | LG7 | 3'-5' exoribonuclease             | not DE   | not DE   | not DE   | not DE  |
| EVM0018224 | LG7 | 3'-5' exoribonuclease             | not DE   | not DE   | not DE   | not DE  |
| EVM0005642 | LG7 | 4-coumarate--CoA ligase-like      | not DE   | not DE   | not DE   | not DE  |
| EVM0018987 | LG7 | 40S ribosomal protein S15a-5      | not DE   | not DE   | not DE   | not DE  |
| EVM0004999 | LG7 | 40S ribosomal protein S23         | not DE   | not DE   | not DE   | not DE  |
| EVM0001770 | LG7 | 40S ribosomal protein S24-2       | not DE   | not DE   | not DE   | not DE  |
| EVM0013395 | LG7 | 5-methyltetrahydropteroyltri      | not DE   | not DE   | not DE   | not DE  |
| EVM0014376 | LG7 | 60S acidic ribosomal protein      | not DE   | not DE   | not DE   | not DE  |
| EVM0021468 | LG7 | 60S ribosomal protein L27-like    | not DE   | not DE   | not DE   | not DE  |
| EVM0017746 | LG7 | ABC transporter F family mem      | 1.496045 | 0.007719 | not DE   | not DE  |
| EVM0009566 | LG7 | ABC transporter G family mem      | not DE   | not DE   | not DE   | not DE  |
| EVM0023807 | LG7 | ABC transporter G family mem      | not DE   | not DE   | not DE   | not DE  |
| EVM0001546 | LG7 | AP2-like ethylene-responsive      | not DE   | not DE   | not DE   | not DE  |
| EVM0007943 | LG7 | BEL1-like homeodomain protei      | not DE   | not DE   | not DE   | not DE  |
| EVM0000870 | LG7 | BTB/POZ and MATH domain-cont      | not DE   | not DE   | not DE   | not DE  |
| EVM0019582 | LG7 | CAP-Gly domain-containing li      | not DE   | not DE   | -1.24478 | 0.00032 |
| EVM0009530 | LG7 | DEAD-box ATP-dependent RNA h      | not DE   | not DE   | not DE   | not DE  |
| EVM0022391 | LG7 | DEAD-box ATP-dependent RNA h      | not DE   | not DE   | not DE   | not DE  |
| EVM0016951 | LG7 | DNA ligase 1-like                 | not DE   | not DE   | not DE   | not DE  |
| EVM0005788 | LG7 | DNA repair protein RAD51 hom      | not DE   | not DE   | not DE   | not DE  |
| EVM0004591 | LG7 | DNA-damage-repair/toleration      | not DE   | not DE   | not DE   | not DE  |
| EVM0010176 | LG7 | DNA-directed RNA polymerase       | not DE   | not DE   | not DE   | not DE  |
| EVM0023101 | LG7 | E3 SUMO-protein ligase SIZ1-      | not DE   | not DE   | not DE   | not DE  |
| EVM0013577 | LG7 | E3 UFM1-protein ligase 1 hom      | not DE   | not DE   | not DE   | not DE  |
| EVM0016800 | LG7 | E3 UFM1-protein ligase 1 hom      | not DE   | not DE   | not DE   | not DE  |
| EVM0005396 | LG7 | E3 ubiquitin ligase BIG BRO       | not DE   | not DE   | not DE   | not DE  |
| EVM0001614 | LG7 | E3 ubiquitin-protein ligase       | not DE   | not DE   | not DE   | not DE  |
| EVM0022476 | LG7 | E3 ubiquitin-protein ligase       | not DE   | not DE   | not DE   | not DE  |
| EVM0004635 | LG7 | E3 ubiquitin-protein ligase       | not DE   | not DE   | not DE   | not DE  |
| EVM0020099 | LG7 | ETHYLENE INSENSITIVE 3-like       | not DE   | not DE   | not DE   | not DE  |
| EVM0012790 | LG7 | F-box/LRR-repeat protein Atl      | not DE   | not DE   | not DE   | not DE  |
| EVM0006034 | LG7 | F-box/WD-40 repeat-containin      | not DE   | not DE   | not DE   | not DE  |

|            |     |                                                     |          |          |          |         |
|------------|-----|-----------------------------------------------------|----------|----------|----------|---------|
| EVM0014809 | LG7 | G-type lectin S-receptor-like                       | not DE   | not DE   | not DE   | not DE  |
| EVM0014892 | LG7 | G-type lectin S-receptor-like                       | not DE   | not DE   | not DE   | not DE  |
| EVM0020499 | LG7 | G-type lectin S-receptor-like                       | not DE   | not DE   | not DE   | not DE  |
| EVM0005240 | LG7 | G2/mitotic-specific cyclin-like                     | not DE   | not DE   | not DE   | not DE  |
| EVM0021835 | LG7 | G2/mitotic-specific cyclin-like                     | not DE   | not DE   | not DE   | not DE  |
| EVM0009288 | LG7 | GATA transcription factor like                      | not DE   | not DE   | not DE   | not DE  |
| EVM0003523 | LG7 | GDSL esterase/lipase At5g228                        | not DE   | not DE   | not DE   | not DE  |
| EVM0018277 | LG7 | GDSL esterase/lipase At5g418                        | not DE   | not DE   | not DE   | not DE  |
| EVM0014380 | LG7 | GTPase-activating protein gamma                     | not DE   | not DE   | not DE   | not DE  |
| EVM0013111 | LG7 | L-ascorbate oxidase homolog                         | not DE   | not DE   | not DE   | not DE  |
| EVM0016814 | LG7 | L-ascorbate oxidase-like                            | not DE   | not DE   | not DE   | not DE  |
| EVM0007108 | LG7 | LOB domain-containing protein                       | not DE   | not DE   | not DE   | not DE  |
| EVM0003328 | LG7 | LOW QUALITY PROTEIN: subtilisin                     | not DE   | not DE   | 1.704811 | 0.02711 |
| EVM0005631 | LG7 | LOW QUALITY PROTEIN: uncharacterized                | not DE   | not DE   | not DE   | not DE  |
| EVM0005034 | LG7 | NAC domain-containing protein                       | not DE   | not DE   | not DE   | not DE  |
| EVM0008227 | LG7 | NAC domain-containing protein                       | not DE   | not DE   | not DE   | not DE  |
| EVM0020193 | LG7 | NAD(H) kinase 1-like isoform                        | not DE   | not DE   | not DE   | not DE  |
| EVM0001036 | LG7 | OTU domain-containing protein                       | not DE   | not DE   | not DE   | not DE  |
| EVM0004472 | LG7 | OTU domain-containing protein                       | not DE   | not DE   | not DE   | not DE  |
| EVM0008209 | LG7 | SNF1-related protein kinase                         | not DE   | not DE   | not DE   | not DE  |
| EVM0016492 | LG7 | SNF1-related protein kinase                         | not DE   | not DE   | not DE   | not DE  |
| EVM0001174 | LG7 | UPF0481 protein At3g47200-like                      | not DE   | not DE   | not DE   | not DE  |
| EVM0009739 | LG7 | UPF0481 protein At3g47200-like                      | not DE   | not DE   | not DE   | not DE  |
| EVM0024123 | LG7 | WAT1-related protein Atlg436                        | not DE   | not DE   | not DE   | not DE  |
| EVM0008810 | LG7 | alcohol-forming fatty acyl-CoA                      | not DE   | not DE   | not DE   | not DE  |
| EVM0009254 | LG7 | alcohol-forming fatty acyl-CoA                      | not DE   | not DE   | not DE   | not DE  |
| EVM0015075 | LG7 | alcohol-forming fatty acyl-CoA                      | not DE   | not DE   | not DE   | not DE  |
| EVM0012770 | LG7 | alkaline/neutral invertase C                        | not DE   | not DE   | not DE   | not DE  |
| EVM0005658 | LG7 | aluminum-activated malate transaminase              | not DE   | not DE   | not DE   | not DE  |
| EVM0003890 | LG7 | ankyrin repeat-containing protein                   | not DE   | not DE   | not DE   | not DE  |
| EVM0011279 | LG7 | ankyrin repeat-containing protein                   | not DE   | not DE   | not DE   | not DE  |
| EVM0008614 | LG7 | ankyrin repeat-containing protein                   | not DE   | not DE   | not DE   | not DE  |
| EVM0013216 | LG7 | ankyrin repeat-containing protein                   | not DE   | not DE   | not DE   | not DE  |
| EVM0018194 | LG7 | ankyrin repeat-containing protein                   | not DE   | not DE   | not DE   | not DE  |
| EVM0024417 | LG7 | ankyrin repeat-containing protein                   | not DE   | not DE   | not DE   | not DE  |
| EVM0021542 | LG7 | ankyrin-2-like                                      | not DE   | not DE   | not DE   | not DE  |
| EVM0008159 | LG7 | anthocyanidin 3-O-glucoside                         | not DE   | not DE   | not DE   | not DE  |
| EVM0006472 | LG7 | arabinogalactan peptide 13-like                     | not DE   | not DE   | 2.191607 | #####   |
| EVM0001363 | LG7 | armadillo repeat-containing protein                 | not DE   | not DE   | not DE   | not DE  |
| EVM0007469 | LG7 | armadillo repeat-containing protein                 | not DE   | not DE   | not DE   | not DE  |
| EVM0016407 | LG7 | aspartic proteinase nepenthesin                     | not DE   | not DE   | not DE   | not DE  |
| EVM0008894 | LG7 | aspartic proteinase-like protein                    | not DE   | not DE   | not DE   | not DE  |
| EVM0013678 | LG7 | beta-glucosidase 12-like                            | not DE   | not DE   | not DE   | not DE  |
| EVM0017261 | LG7 | beta-glucosidase 12-like                            | not DE   | not DE   | not DE   | not DE  |
| EVM0016660 | LG7 | beta-glucosidase 24-like                            | not DE   | not DE   | not DE   | not DE  |
| EVM0004583 | LG7 | bifunctional aspartokinase/histidine kinase         | not DE   | not DE   | not DE   | not DE  |
| EVM0016746 | LG7 | biogenesis of lysosome-related organelles complex 1 | not DE   | not DE   | not DE   | not DE  |
| EVM0000265 | LG7 | bystin-like isoform X3                              | 1.338827 | 0.000647 | not DE   | not DE  |
| EVM0021329 | LG7 | caffeic acid 3-O-methyltransferase                  | not DE   | not DE   | not DE   | not DE  |
| EVM0024572 | LG7 | caffeic acid 3-O-methyltransferase                  | not DE   | not DE   | not DE   | not DE  |
| EVM0013265 | LG7 | callose synthase 2-like                             | not DE   | not DE   | not DE   | not DE  |
| EVM0016178 | LG7 | callose synthase 2-like                             | not DE   | not DE   | not DE   | not DE  |
| EVM0011962 | LG7 | callose synthase 9-like isoform                     | not DE   | not DE   | -1.22697 | #####   |
| EVM0018544 | LG7 | calmodulin-7 isoform X1                             | not DE   | not DE   | not DE   | not DE  |

|            |     |                                   |          |          |          |        |
|------------|-----|-----------------------------------|----------|----------|----------|--------|
| EVM0006974 | LG7 | calpain-type cysteine protease    | not DE   | not DE   | not DE   | not DE |
| EVM0002018 | LG7 | casbene synthase, chloroplast     | not DE   | not DE   | not DE   | not DE |
| EVM0003445 | LG7 | casbene synthase, chloroplast     | not DE   | not DE   | not DE   | not DE |
| EVM0006028 | LG7 | casbene synthase, chloroplast     | not DE   | not DE   | not DE   | not DE |
| EVM0008265 | LG7 | casbene synthase, chloroplast     | not DE   | not DE   | not DE   | not DE |
| EVM0009512 | LG7 | casbene synthase, chloroplast     | not DE   | not DE   | not DE   | not DE |
| EVM0010007 | LG7 | casbene synthase, chloroplast     | not DE   | not DE   | not DE   | not DE |
| EVM0020639 | LG7 | casbene synthase, chloroplast     | not DE   | not DE   | not DE   | not DE |
| EVM0020794 | LG7 | casbene synthase, chloroplast     | not DE   | not DE   | not DE   | not DE |
| EVM0023043 | LG7 | casbene synthase, chloroplast     | not DE   | not DE   | not DE   | not DE |
| EVM0023560 | LG7 | casbene synthase, chloroplast     | not DE   | not DE   | not DE   | not DE |
| EVM0004254 | LG7 | chitinase 2-like                  | not DE   | not DE   | not DE   | not DE |
| EVM0021182 | LG7 | chromodomain-helicase-DNA-binding | not DE   | not DE   | not DE   | not DE |
| EVM0003951 | LG7 | classical arabinogalactan protein | not DE   | not DE   | not DE   | not DE |
| EVM0009258 | LG7 | classical arabinogalactan protein | -3.39259 | 2.94E-06 | not DE   | not DE |
| EVM0012798 | LG7 | constitutive photomorphogenesis   | not DE   | not DE   | not DE   | not DE |
| EVM0008091 | LG7 | crt homolog 1-like                | not DE   | not DE   | not DE   | not DE |
| EVM0002631 | LG7 | cucumislin-like                   | not DE   | not DE   | not DE   | not DE |
| EVM0001896 | LG7 | cytochrome P450 94A1-like         | not DE   | not DE   | not DE   | not DE |
| EVM0020307 | LG7 | cytokinin riboside 5'-phosphoryl  | not DE   | not DE   | not DE   | not DE |
| EVM0000042 | LG7 | dehydrogenase/reductase SDR       | not DE   | not DE   | not DE   | not DE |
| EVM0019734 | LG7 | dentin sialophosphoprotein-like   | not DE   | not DE   | not DE   | not DE |
| EVM0024019 | LG7 | dentin sialophosphoprotein-like   | not DE   | not DE   | not DE   | not DE |
| EVM0013968 | LG7 | dihydropyrimidinase-like          | not DE   | not DE   | not DE   | not DE |
| EVM0017666 | LG7 | dirigent protein 19-like          | not DE   | not DE   | not DE   | not DE |
| EVM0006188 | LG7 | dirigent protein 24-like          | not DE   | not DE   | not DE   | not DE |
| EVM0000411 | LG7 | dnaJ protein homolog isoform      | -2.08296 | 5.52E-05 | -1.85874 | #####  |
| EVM0018659 | LG7 | embryogenesis-associated protein  | not DE   | not DE   | not DE   | not DE |
| EVM0015606 | LG7 | enoyl-[acyl-carrier-protein]      | not DE   | not DE   | not DE   | not DE |
| EVM0012840 | LG7 | ethylene-responsive transcription | not DE   | not DE   | not DE   | not DE |
| EVM0016829 | LG7 | eukaryotic translation initiation | not DE   | not DE   | not DE   | not DE |
| EVM0006299 | LG7 | exonuclease V, chloroplast        | not DE   | not DE   | not DE   | not DE |
| EVM0016923 | LG7 | exosome complex exonuclease       | not DE   | not DE   | not DE   | not DE |
| EVM0018692 | LG7 | extensin-2-like                   | not DE   | not DE   | not DE   | not DE |
| EVM0019710 | LG7 | extensin-2-like                   | not DE   | not DE   | not DE   | not DE |
| EVM0022954 | LG7 | fasciclin-like arabinogalactan    | not DE   | not DE   | not DE   | not DE |
| EVM0023157 | LG7 | fatty acyl-CoA reductase 3-like   | not DE   | not DE   | not DE   | not DE |
| EVM0002225 | LG7 | feruloyl CoA ortho-hydroxylase    | not DE   | not DE   | not DE   | not DE |
| EVM0004363 | LG7 | feruloyl CoA ortho-hydroxylase    | not DE   | not DE   | not DE   | not DE |
| EVM0004644 | LG7 | feruloyl CoA ortho-hydroxylase    | not DE   | not DE   | not DE   | not DE |
| EVM0004759 | LG7 | feruloyl CoA ortho-hydroxylase    | not DE   | not DE   | not DE   | not DE |
| EVM0005595 | LG7 | feruloyl CoA ortho-hydroxylase    | not DE   | not DE   | not DE   | not DE |
| EVM0005926 | LG7 | feruloyl CoA ortho-hydroxylase    | not DE   | not DE   | not DE   | not DE |
| EVM0008298 | LG7 | feruloyl CoA ortho-hydroxylase    | not DE   | not DE   | not DE   | not DE |
| EVM0010312 | LG7 | feruloyl CoA ortho-hydroxylase    | not DE   | not DE   | not DE   | not DE |
| EVM0012325 | LG7 | feruloyl CoA ortho-hydroxylase    | not DE   | not DE   | not DE   | not DE |
| EVM0015637 | LG7 | feruloyl CoA ortho-hydroxylase    | not DE   | not DE   | not DE   | not DE |
| EVM0017515 | LG7 | feruloyl CoA ortho-hydroxylase    | not DE   | not DE   | not DE   | not DE |
| EVM0019466 | LG7 | feruloyl CoA ortho-hydroxylase    | not DE   | not DE   | not DE   | not DE |
| EVM0022921 | LG7 | feruloyl CoA ortho-hydroxylase    | not DE   | not DE   | not DE   | not DE |
| EVM0017592 | LG7 | flavanone 7-O-glucoside 2-epi     | not DE   | not DE   | not DE   | not DE |
| EVM0017371 | LG7 | formate--tetrahydrofolate li      | not DE   | not DE   | not DE   | not DE |
| EVM0008914 | LG7 | germin-like protein 9-3           | not DE   | not DE   | not DE   | not DE |
| EVM0004596 | LG7 | growth-regulating factor 8-like   | not DE   | not DE   | not DE   | not DE |

|            |     |                              |          |          |          |         |
|------------|-----|------------------------------|----------|----------|----------|---------|
| EVM0009576 | LG7 | high affinity nitrate transp | not DE   | not DE   | not DE   | not DE  |
| EVM0016447 | LG7 | high affinity nitrate transp | not DE   | not DE   | not DE   | not DE  |
| EVM0000028 | LG7 | histone H2B.2-like           | not DE   | not DE   | not DE   | not DE  |
| EVM0012242 | LG7 | histone deacetylase 9-like   | not DE   | not DE   | not DE   | not DE  |
| EVM0003480 | LG7 | histone deacetylase HDT1-lik | not DE   | not DE   | not DE   | not DE  |
| EVM0000733 | LG7 | homeobox-leucine zipper prot | 1.407556 | 0.001688 | not DE   | not DE  |
| EVM0022358 | LG7 | hydroxyacyl-thioester dehydr | 1.799985 | 0.028718 | 1.748906 | 0.01242 |
| EVM0004536 | LG7 | hydroxymethylglutaryl-CoA ly | not DE   | not DE   | not DE   | not DE  |
| EVM0014994 | LG7 | integrator complex subunit 3 | not DE   | not DE   | not DE   | not DE  |
| EVM0001238 | LG7 | lactoylglutathione lyase isc | not DE   | not DE   | not DE   | not DE  |
| EVM0014696 | LG7 | large subunit GTPase 1 homol | not DE   | not DE   | not DE   | not DE  |
| EVM0004614 | LG7 | linoleate 13S-lipoxygenase 2 | not DE   | not DE   | not DE   | not DE  |
| EVM0004686 | LG7 | linoleate 13S-lipoxygenase 2 | not DE   | not DE   | not DE   | not DE  |
| EVM0009328 | LG7 | linoleate 13S-lipoxygenase 2 | not DE   | not DE   | not DE   | not DE  |
| EVM0015334 | LG7 | linoleate 13S-lipoxygenase 2 | not DE   | not DE   | not DE   | not DE  |
| EVM0015511 | LG7 | linoleate 13S-lipoxygenase 2 | not DE   | not DE   | not DE   | not DE  |
| EVM0020815 | LG7 | linoleate 13S-lipoxygenase 2 | not DE   | not DE   | not DE   | not DE  |
| EVM0023780 | LG7 | lysine-specific demethylase  | not DE   | not DE   | not DE   | not DE  |
| EVM0008654 | LG7 | lysosomal Pro-X carboxypepti | not DE   | not DE   | not DE   | not DE  |
| EVM0000003 | LG7 | lysosomal Pro-X carboxypepti | not DE   | not DE   | not DE   | not DE  |
| EVM0012504 | LG7 | lysosomal Pro-X carboxypepti | not DE   | not DE   | not DE   | not DE  |
| EVM0015726 | LG7 | lysosomal beta glucosidase-l | not DE   | not DE   | not DE   | not DE  |
| EVM0024387 | LG7 | magnesium transporter NIPA3- | 1.370196 | 0.035055 | not DE   | not DE  |
| EVM0003069 | LG7 | magnesium-chelatase subunit  | not DE   | not DE   | not DE   | not DE  |
| EVM0008748 | LG7 | metal tolerance protein 1-li | not DE   | not DE   | not DE   | not DE  |
| EVM0005011 | LG7 | mitochondrial dicarboxylate/ | not DE   | not DE   | not DE   | not DE  |
| EVM0000495 | LG7 | mitochondrial tRNA-specific  | not DE   | not DE   | not DE   | not DE  |
| EVM0001756 | LG7 | mitochondrial tRNA-specific  | -1.90872 | 0.020749 | -3.7369  | 0.00421 |
| EVM0005766 | LG7 | mitogen-activated protein ki | not DE   | not DE   | not DE   | not DE  |
| EVM0024425 | LG7 | nicalin-1-like               | not DE   | not DE   | not DE   | not DE  |
| EVM0023466 | LG7 | non-specific phospholipase C | not DE   | not DE   | not DE   | not DE  |
| EVM0011293 | LG7 | nuclear cap-binding protein  | not DE   | not DE   | not DE   | not DE  |
| EVM0022638 | LG7 | nucleobase-ascorbate transp  | not DE   | not DE   | -1.04849 | 0.0288  |
| EVM0011079 | LG7 | nucleolar complex protein 2  | not DE   | not DE   | not DE   | not DE  |
| EVM0006728 | LG7 | nudix hydrolase 9-like       | not DE   | not DE   | not DE   | not DE  |
| EVM0022958 | LG7 | oligoribonuclease-like       | 1.086557 | 0.005481 | not DE   | not DE  |
| EVM0016335 | LG7 | origin recognition complex s | not DE   | not DE   | not DE   | not DE  |
| EVM0023087 | LG7 | outer envelope protein 61, c | not DE   | not DE   | not DE   | not DE  |
| EVM0002890 | LG7 | outer envelope protein 80, c | not DE   | not DE   | not DE   | not DE  |
| EVM0005573 | LG7 | outer envelope protein 80, c | not DE   | not DE   | not DE   | not DE  |
| EVM0002168 | LG7 | pentatricopeptide repeat-con | not DE   | not DE   | not DE   | not DE  |
| EVM0009446 | LG7 | pentatricopeptide repeat-con | not DE   | not DE   | not DE   | not DE  |
| EVM0008628 | LG7 | pentatricopeptide repeat-con | not DE   | not DE   | not DE   | not DE  |
| EVM0012405 | LG7 | pentatricopeptide repeat-con | not DE   | not DE   | not DE   | not DE  |
| EVM0003219 | LG7 | pentatricopeptide repeat-con | not DE   | not DE   | not DE   | not DE  |
| EVM0022916 | LG7 | pentatricopeptide repeat-con | not DE   | not DE   | not DE   | not DE  |
| EVM0004797 | LG7 | pentatricopeptide repeat-con | not DE   | not DE   | not DE   | not DE  |
| EVM0015609 | LG7 | pentatricopeptide repeat-con | not DE   | not DE   | not DE   | not DE  |
| EVM0004947 | LG7 | pentatricopeptide repeat-con | not DE   | not DE   | not DE   | not DE  |
| EVM0006435 | LG7 | pentatricopeptide repeat-con | not DE   | not DE   | not DE   | not DE  |
| EVM0015248 | LG7 | pentatricopeptide repeat-con | not DE   | not DE   | not DE   | not DE  |
| EVM0016664 | LG7 | pentatricopeptide repeat-con | not DE   | not DE   | not DE   | not DE  |
| EVM0021260 | LG7 | pentatricopeptide repeat-con | not DE   | not DE   | not DE   | not DE  |
| EVM0003948 | LG7 | peptidyl-tRNA hydrolase, mit | 1.491323 | 0.00064  | not DE   | not DE  |



|            |     |                               |          |          |          |         |
|------------|-----|-------------------------------|----------|----------|----------|---------|
| EVM0006647 | LG7 | peroxidase 15-like            | not DE   | not DE   | not DE   | not DE  |
| EVM0007024 | LG7 | peroxidase 15-like            | not DE   | not DE   | not DE   | not DE  |
| EVM0013959 | LG7 | peroxidase 15-like            | not DE   | not DE   | not DE   | not DE  |
| EVM0017173 | LG7 | peroxidase 15-like            | not DE   | not DE   | not DE   | not DE  |
| EVM0019896 | LG7 | peroxidase 15-like            | not DE   | not DE   | not DE   | not DE  |
| EVM0015984 | LG7 | pescadillo homolog            | not DE   | not DE   | not DE   | not DE  |
| EVM0023476 | LG7 | pescadillo homolog            | not DE   | not DE   | not DE   | not DE  |
| EVM0021011 | LG7 | pheophorbide a oxygenase, ch  | not DE   | not DE   | not DE   | not DE  |
| EVM0024415 | LG7 | phosphatidylinositol N-acety  | not DE   | not DE   | not DE   | not DE  |
| EVM0005807 | LG7 | phosphatidylinositol transfe  | not DE   | not DE   | not DE   | not DE  |
| EVM0002565 | LG7 | phytochromobilin:ferredoxin   | not DE   | not DE   | not DE   | not DE  |
| EVM0000012 | LG7 | polyadenylate-binding protei  | not DE   | not DE   | not DE   | not DE  |
| EVM0015295 | LG7 | probable E3 ubiquitin-protei  | not DE   | not DE   | not DE   | not DE  |
| EVM0003547 | LG7 | probable LRR receptor-like s  | not DE   | not DE   | not DE   | not DE  |
| EVM0011017 | LG7 | probable LRR receptor-like s  | not DE   | not DE   | not DE   | not DE  |
| EVM0008433 | LG7 | probable RNA &apos;-termina   | not DE   | not DE   | not DE   | not DE  |
| EVM0021201 | LG7 | probable aquaporin NIP5-1-li  | not DE   | not DE   | not DE   | not DE  |
| EVM0010006 | LG7 | probable glucuronoxylan gluc  | -1.39729 | 0.014556 | not DE   | not DE  |
| EVM0015645 | LG7 | probable histone H2B.1-like   | not DE   | not DE   | 2.281397 | 0.00493 |
| EVM0020652 | LG7 | probable histone H2B.1-like   | not DE   | not DE   | not DE   | not DE  |
| EVM0000939 | LG7 | probable leucine-rich repeat  | not DE   | not DE   | not DE   | not DE  |
| EVM0023919 | LG7 | probable leucine-rich repeat  | not DE   | not DE   | not DE   | not DE  |
| EVM0013778 | LG7 | probable phosphomevalonate k  | not DE   | not DE   | not DE   | not DE  |
| EVM0023500 | LG7 | probable polyamine transport  | not DE   | not DE   | not DE   | not DE  |
| EVM0006790 | LG7 | probable receptor protein kin | not DE   | not DE   | not DE   | not DE  |
| EVM0012212 | LG7 | probable receptor-like prote  | not DE   | not DE   | not DE   | not DE  |
| EVM0016354 | LG7 | probable receptor-like prote  | not DE   | not DE   | not DE   | not DE  |
| EVM0016436 | LG7 | probable receptor-like prote  | not DE   | not DE   | not DE   | not DE  |
| EVM0021948 | LG7 | proteasome subunit beta type  | not DE   | not DE   | not DE   | not DE  |
| EVM0022347 | LG7 | protein BUD31 homolog 2-like  | not DE   | not DE   | not DE   | not DE  |
| EVM0007714 | LG7 | protein FAF-like, chloroplas  | not DE   | not DE   | not DE   | not DE  |
| EVM0005736 | LG7 | protein FANTASTIC FOUR 3-lik  | not DE   | not DE   | not DE   | not DE  |
| EVM0020944 | LG7 | protein FAR1-RELATED SEQUENC  | not DE   | not DE   | not DE   | not DE  |
| EVM0018425 | LG7 | protein FAR1-RELATED SEQUENC  | 1.007275 | 2.38E-05 | not DE   | not DE  |
| EVM0013458 | LG7 | protein FAR1-RELATED SEQUENC  | not DE   | not DE   | not DE   | not DE  |
| EVM0020064 | LG7 | protein GPR107-like           | not DE   | not DE   | not DE   | not DE  |
| EVM0018320 | LG7 | protein HIRA-like isoform X2  | not DE   | not DE   | not DE   | not DE  |
| EVM0022068 | LG7 | protein N-lysine methyltrans  | not DE   | not DE   | not DE   | not DE  |
| EVM0016996 | LG7 | protein UPSTREAM OF FLC-like  | not DE   | not DE   | not DE   | not DE  |
| EVM0002852 | LG7 | protein argonaute 4-like      | not DE   | not DE   | not DE   | not DE  |
| EVM0006632 | LG7 | protein argonaute 5-like      | not DE   | not DE   | not DE   | not DE  |
| EVM0014623 | LG7 | protein disulfide isomerase-  | not DE   | not DE   | not DE   | not DE  |
| EVM0022291 | LG7 | protein disulfide isomerase-  | not DE   | not DE   | not DE   | not DE  |
| EVM0011383 | LG7 | protein disulfide isomerase-  | not DE   | not DE   | not DE   | not DE  |
| EVM0015715 | LG7 | protein piccolo-like          | not DE   | not DE   | not DE   | not DE  |
| EVM0005242 | LG7 | protein slowmo homolog 2-lik  | -1.35389 | 0.023003 | not DE   | not DE  |
| EVM0000750 | LG7 | protein-lysine methyltransfe  | not DE   | not DE   | not DE   | not DE  |
| EVM0010050 | LG7 | proteinaceous RNase P 2-like  | not DE   | not DE   | not DE   | not DE  |
| EVM0002444 | LG7 | protochlorophyllide-dependen  | not DE   | not DE   | not DE   | not DE  |
| EVM0003972 | LG7 | protochlorophyllide-dependen  | not DE   | not DE   | not DE   | not DE  |
| EVM0021725 | LG7 | protochlorophyllide-dependen  | not DE   | not DE   | not DE   | not DE  |
| EVM0002845 | LG7 | pseudouridine-metabolizing b  | not DE   | not DE   | not DE   | not DE  |
| EVM0018766 | LG7 | pseudouridine-metabolizing b  | not DE   | not DE   | not DE   | not DE  |
| EVM0008332 | LG7 | putative SWI/SNF-related mat  | not DE   | not DE   | not DE   | not DE  |

|            |     |                                    |          |          |          |         |
|------------|-----|------------------------------------|----------|----------|----------|---------|
| EVM0013073 | LG7 | putative SWI/SNF-related mat       | not DE   | not DE   | not DE   | not DE  |
| EVM0009361 | LG7 | putative UPF0481 protein At3       | not DE   | not DE   | not DE   | not DE  |
| EVM0014440 | LG7 | putative UPF0481 protein At3       | not DE   | not DE   | not DE   | not DE  |
| EVM0005250 | LG7 | putative cyclic nucleotide-g       | not DE   | not DE   | not DE   | not DE  |
| EVM0002721 | LG7 | putative disease resistance        | not DE   | not DE   | not DE   | not DE  |
| EVM0003332 | LG7 | putative disease resistance        | not DE   | not DE   | not DE   | not DE  |
| EVM0007181 | LG7 | putative disease resistance        | not DE   | not DE   | not DE   | not DE  |
| EVM0009802 | LG7 | putative disease resistance        | not DE   | not DE   | not DE   | not DE  |
| EVM0014744 | LG7 | putative disease resistance        | 1.168512 | 0.03528  | not DE   | not DE  |
| EVM0016917 | LG7 | putative disease resistance        | not DE   | not DE   | not DE   | not DE  |
| EVM0017193 | LG7 | putative disease resistance        | not DE   | not DE   | not DE   | not DE  |
| EVM0018655 | LG7 | putative disease resistance        | not DE   | not DE   | not DE   | not DE  |
| EVM0018777 | LG7 | putative disease resistance        | not DE   | not DE   | not DE   | not DE  |
| EVM0021488 | LG7 | putative inactive disease su       | not DE   | not DE   | not DE   | not DE  |
| EVM0002332 | LG7 | putative nitric oxide syntha       | not DE   | not DE   | not DE   | not DE  |
| EVM0009893 | LG7 | putative pentatricopeptide r       | not DE   | not DE   | not DE   | not DE  |
| EVM0018101 | LG7 | putative phosphatidylglycerol      | not DE   | not DE   | not DE   | not DE  |
| EVM0015898 | LG7 | putative phytosulfokines 6-l       | not DE   | not DE   | 1.681307 | 0.01242 |
| EVM0010118 | LG7 | pyridoxal biosynthesis protei      | not DE   | not DE   | not DE   | not DE  |
| EVM0011836 | LG7 | pyruvate dehydrogenase E1 co       | not DE   | not DE   | not DE   | not DE  |
| EVM0009141 | LG7 | ras guanine nucleotide excha       | 1.182293 | 0.046014 | not DE   | not DE  |
| EVM0021943 | LG7 | reactive oxygen species modu       | not DE   | not DE   | not DE   | not DE  |
| EVM0024438 | LG7 | rho GTPase-activating protei       | not DE   | not DE   | not DE   | not DE  |
| EVM0008115 | LG7 | rho GTPase-activating protei       | not DE   | not DE   | not DE   | not DE  |
| EVM0012360 | LG7 | ruBisCO large subunit-bindin       | -1.15757 | 9.75E-05 | -1.02683 | #####   |
| EVM0020868 | LG7 | serine carboxypeptidase-like       | not DE   | not DE   | not DE   | not DE  |
| EVM0014187 | LG7 | serine--glyoxylate aminotran       | not DE   | not DE   | not DE   | not DE  |
| EVM0003848 | LG7 | serine/threonine-protein kin       | not DE   | not DE   | not DE   | not DE  |
| EVM0001800 | LG7 | serine/threonine-protein kin       | not DE   | not DE   | not DE   | not DE  |
| EVM0005778 | LG7 | serine/threonine-protein kin       | not DE   | not DE   | not DE   | not DE  |
| EVM0006914 | LG7 | serine/threonine-protein pho       | not DE   | not DE   | not DE   | not DE  |
| EVM0021276 | LG7 | set1/Ash2 histone methyltran       | not DE   | not DE   | not DE   | not DE  |
| EVM0023851 | LG7 | shugoshin-1-like                   | not DE   | not DE   | not DE   | not DE  |
| EVM0012716 | LG7 | splicing factor 3B subunit 6       | not DE   | not DE   | not DE   | not DE  |
| EVM0020497 | LG7 | superoxide dismutase               | not DE   | not DE   | not DE   | not DE  |
| EVM0001713 | LG7 | threonine dehydratase biosyn       | not DE   | not DE   | 2.207697 | 0.00049 |
| EVM0015131 | LG7 | trans-resveratrol di-O-methy       | not DE   | not DE   | not DE   | not DE  |
| EVM0002665 | LG7 | transcription factor MYC2-li       | not DE   | not DE   | not DE   | not DE  |
| EVM0012476 | LG7 | transcription factor MYC2-li       | not DE   | not DE   | not DE   | not DE  |
| EVM0018742 | LG7 | transcription factor MYC2-li       | not DE   | not DE   | not DE   | not DE  |
| EVM0022626 | LG7 | transcription factor Pur- $\alpha$ | not DE   | not DE   | not DE   | not DE  |
| EVM0012093 | LG7 | transcription initiation fac       | -3.02332 | 0.04816  | not DE   | not DE  |
| EVM0017461 | LG7 | transcriptional regulator AT       | not DE   | not DE   | not DE   | not DE  |
| EVM0005663 | LG7 | translocation protein sec62        | not DE   | not DE   | not DE   | not DE  |
| EVM0024506 | LG7 | translocation protein sec62        | not DE   | not DE   | not DE   | not DE  |
| EVM0000137 | LG7 | transmembrane protein 120 ho       | not DE   | not DE   | not DE   | not DE  |
| EVM0019986 | LG7 | transmembrane protein 209-li       | not DE   | not DE   | not DE   | not DE  |
| EVM0018181 | LG7 | transmembrane protein 45B-li       | not DE   | not DE   | not DE   | not DE  |
| EVM0012609 | LG7 | transposon Ty3-G Gag-Pol pol       | not DE   | not DE   | not DE   | not DE  |
| EVM0016075 | LG7 | tubulin alpha-3 chain              | not DE   | not DE   | not DE   | not DE  |
| EVM0007227 | LG7 | ubiquitin-conjugating enzyme       | not DE   | not DE   | 1.36753  | 0.00864 |
| EVM0020905 | LG7 | ubiquitin-like protein 5-lik       | -2.24659 | 0.012714 | not DE   | not DE  |
| EVM0016564 | LG7 | uncharacterized protein Atlg       | not DE   | not DE   | not DE   | not DE  |
| EVM0004513 | LG7 | uncharacterized protein At2g       | not DE   | not DE   | not DE   | not DE  |

|            |     |                              |          |          |          |         |
|------------|-----|------------------------------|----------|----------|----------|---------|
| EVM0012882 | LG7 | uncharacterized protein At2g | not DE   | not DE   | not DE   | not DE  |
| EVM0002760 | LG7 | uncharacterized protein LOC1 | not DE   | not DE   | not DE   | not DE  |
| EVM0016359 | LG7 | uncharacterized protein LOC1 | not DE   | not DE   | not DE   | not DE  |
| EVM0002065 | LG7 | uncharacterized protein LOC1 | not DE   | not DE   | not DE   | not DE  |
| EVM0014776 | LG7 | uncharacterized protein LOC1 | not DE   | not DE   | not DE   | not DE  |
| EVM0012858 | LG7 | uncharacterized protein LOC1 | not DE   | not DE   | 1.238158 | #####   |
| EVM0016331 | LG7 | uncharacterized protein LOC1 | not DE   | not DE   | not DE   | not DE  |
| EVM0017044 | LG7 | uncharacterized protein LOC1 | not DE   | not DE   | not DE   | not DE  |
| EVM0001071 | LG7 | uncharacterized protein LOC1 | not DE   | not DE   | not DE   | not DE  |
| EVM0018319 | LG7 | uncharacterized protein LOC1 | not DE   | not DE   | not DE   | not DE  |
| EVM0005022 | LG7 | uncharacterized protein LOC1 | not DE   | not DE   | not DE   | not DE  |
| EVM0021557 | LG7 | uncharacterized protein LOC1 | not DE   | not DE   | not DE   | not DE  |
| EVM0019038 | LG7 | uncharacterized protein LOC1 | not DE   | not DE   | not DE   | not DE  |
| EVM0014982 | LG7 | uncharacterized protein LOC1 | not DE   | not DE   | not DE   | not DE  |
| EVM0010252 | LG7 | uncharacterized protein LOC1 | -1.13801 | 0.000281 | not DE   | not DE  |
| EVM0006808 | LG7 | uncharacterized protein LOC1 | not DE   | not DE   | not DE   | not DE  |
| EVM0023778 | LG7 | uncharacterized protein LOC1 | not DE   | not DE   | not DE   | not DE  |
| EVM0012724 | LG7 | uncharacterized protein LOC1 | not DE   | not DE   | not DE   | not DE  |
| EVM0015011 | LG7 | uncharacterized protein LOC1 | -1.89747 | 0.024947 | not DE   | not DE  |
| EVM0021410 | LG7 | uncharacterized protein LOC1 | not DE   | not DE   | not DE   | not DE  |
| EVM0006502 | LG7 | uncharacterized protein LOC1 | not DE   | not DE   | not DE   | not DE  |
| EVM0024559 | LG7 | uncharacterized protein LOC1 | not DE   | not DE   | 1.206666 | 0.00515 |
| EVM0014658 | LG7 | uncharacterized protein LOC1 | not DE   | not DE   | not DE   | not DE  |
| EVM0006560 | LG7 | uncharacterized protein LOC1 | not DE   | not DE   | -1.01495 | 0.01418 |
| EVM0015785 | LG7 | uncharacterized protein LOC1 | not DE   | not DE   | not DE   | not DE  |
| EVM0002624 | LG7 | uncharacterized protein LOC1 | not DE   | not DE   | not DE   | not DE  |
| EVM0000616 | LG7 | uncharacterized protein LOC1 | not DE   | not DE   | not DE   | not DE  |
| EVM0001550 | LG7 | uncharacterized protein LOC1 | not DE   | not DE   | not DE   | not DE  |
| EVM0012404 | LG7 | uncharacterized protein LOC1 | not DE   | not DE   | not DE   | not DE  |
| EVM0020422 | LG7 | uncharacterized protein LOC1 | not DE   | not DE   | not DE   | not DE  |
| EVM0024454 | LG7 | uncharacterized protein LOC1 | not DE   | not DE   | not DE   | not DE  |
| EVM0023288 | LG7 | uncharacterized protein LOC1 | not DE   | not DE   | not DE   | not DE  |
| EVM0010494 | LG7 | uncharacterized protein LOC1 | not DE   | not DE   | not DE   | not DE  |
| EVM0017448 | LG7 | uncharacterized protein LOC1 | not DE   | not DE   | not DE   | not DE  |
| EVM0011792 | LG7 | uncharacterized protein LOC1 | not DE   | not DE   | not DE   | not DE  |
| EVM0005083 | LG7 | uncharacterized protein LOC1 | not DE   | not DE   | not DE   | not DE  |
| EVM0008620 | LG7 | uncharacterized protein LOC1 | not DE   | not DE   | not DE   | not DE  |
| EVM0004669 | LG7 | uncharacterized protein LOC1 | not DE   | not DE   | not DE   | not DE  |
| EVM0006336 | LG7 | uncharacterized protein LOC1 | 2.520982 | 0.004904 | not DE   | not DE  |
| EVM0012812 | LG7 | uncharacterized protein LOC1 | not DE   | not DE   | not DE   | not DE  |
| EVM0018118 | LG7 | uncharacterized protein LOC1 | not DE   | not DE   | not DE   | not DE  |
| EVM0013887 | LG7 | uncharacterized protein LOC1 | not DE   | not DE   | not DE   | not DE  |
| EVM0016226 | LG7 | uncharacterized protein LOC1 | not DE   | not DE   | not DE   | not DE  |
| EVM0022026 | LG7 | uncharacterized protein LOC1 | not DE   | not DE   | not DE   | not DE  |
| EVM0021639 | LG7 | uncharacterized protein LOC1 | not DE   | not DE   | not DE   | not DE  |
| EVM0013564 | LG7 | uncharacterized protein LOC1 | not DE   | not DE   | not DE   | not DE  |
| EVM0000303 | LG7 | uncharacterized protein LOC1 | not DE   | not DE   | not DE   | not DE  |
| EVM0009586 | LG7 | uncharacterized protein LOC1 | not DE   | not DE   | not DE   | not DE  |
| EVM0005071 | LG7 | uncharacterized protein LOC1 | not DE   | not DE   | not DE   | not DE  |
| EVM0013940 | LG7 | uncharacterized protein LOC1 | not DE   | not DE   | not DE   | not DE  |
| EVM0011260 | LG7 | uncharacterized protein LOC1 | not DE   | not DE   | not DE   | not DE  |
| EVM0003276 | LG7 | uncharacterized protein LOC1 | not DE   | not DE   | not DE   | not DE  |
| EVM0010993 | LG7 | uncharacterized protein LOC1 | not DE   | not DE   | not DE   | not DE  |
| EVM0010330 | LG7 | uncharacterized protein LOC1 | not DE   | not DE   | not DE   | not DE  |

|            |     |                               |          |          |          |         |
|------------|-----|-------------------------------|----------|----------|----------|---------|
| EVM0022659 | LG7 | uncharacterized protein LOC1  | not DE   | not DE   | not DE   | not DE  |
| EVM0008591 | LG7 | uncharacterized protein LOC1  | not DE   | not DE   | not DE   | not DE  |
| EVM0015333 | LG7 | uncharacterized protein LOC1  | not DE   | not DE   | not DE   | not DE  |
| EVM0017221 | LG7 | uncharacterized protein LOC1  | not DE   | not DE   | not DE   | not DE  |
| EVM0018442 | LG7 | uncharacterized protein LOC1  | not DE   | not DE   | not DE   | not DE  |
| EVM0014269 | LG7 | uncharacterized protein LOC1  | not DE   | not DE   | not DE   | not DE  |
| EVM0005001 | LG7 | uncharacterized protein LOC1  | not DE   | not DE   | 1.014678 | 0.03384 |
| EVM0013853 | LG7 | uncharacterized protein LOC1  | not DE   | not DE   | not DE   | not DE  |
| EVM0002518 | LG7 | uncharacterized protein LOC1  | not DE   | not DE   | not DE   | not DE  |
| EVM0017793 | LG7 | uncharacterized protein LOC1  | not DE   | not DE   | not DE   | not DE  |
| EVM0014225 | LG7 | uncharacterized protein LOC1  | not DE   | not DE   | not DE   | not DE  |
| EVM0010860 | LG7 | uncharacterized protein LOC1  | not DE   | not DE   | not DE   | not DE  |
| EVM0021686 | LG7 | uncharacterized protein LOC1  | not DE   | not DE   | not DE   | not DE  |
| EVM0000927 | LG7 | uncharacterized protein LOC1  | not DE   | not DE   | 1.142189 | #####   |
| EVM0022936 | LG7 | uncharacterized protein LOC1  | not DE   | not DE   | not DE   | not DE  |
| EVM0007820 | LG7 | uncharacterized protein LOC1  | not DE   | not DE   | not DE   | not DE  |
| EVM0012739 | LG7 | uncharacterized protein LOC1  | not DE   | not DE   | not DE   | not DE  |
| EVM0014819 | LG7 | uncharacterized protein LOC1  | not DE   | not DE   | not DE   | not DE  |
| EVM0010513 | LG7 | uncharacterized protein LOC1  | not DE   | not DE   | 1.080509 | #####   |
| EVM0015610 | LG7 | uncharacterized protein LOC1  | not DE   | not DE   | not DE   | not DE  |
| EVM0002105 | LG7 | uncharacterized protein LOC1  | not DE   | not DE   | not DE   | not DE  |
| EVM0006087 | LG7 | uncharacterized protein LOC1  | not DE   | not DE   | not DE   | not DE  |
| EVM0010895 | LG7 | uncharacterized protein LOC1  | not DE   | not DE   | not DE   | not DE  |
| EVM0011209 | LG7 | uncharacterized protein LOC1  | not DE   | not DE   | not DE   | not DE  |
| EVM0002751 | LG7 | uncharacterized protein LOC1  | not DE   | not DE   | not DE   | not DE  |
| EVM0009478 | LG7 | uncharacterized protein LOC1  | not DE   | not DE   | not DE   | not DE  |
| EVM0004722 | LG7 | uncharacterized protein LOC1  | not DE   | not DE   | not DE   | not DE  |
| EVM0008561 | LG7 | uncharacterized protein LOC1  | not DE   | not DE   | not DE   | not DE  |
| EVM0020653 | LG7 | uncharacterized protein LOC1  | not DE   | not DE   | not DE   | not DE  |
| EVM0016298 | LG7 | uncharacterized protein LOC1  | not DE   | not DE   | not DE   | not DE  |
| EVM0001282 | LG7 | uncharacterized protein YMR3  | -1.1609  | 0.037613 | not DE   | not DE  |
| EVM0021755 | LG7 | vacuolar protein sorting-ass  | not DE   | not DE   | not DE   | not DE  |
| EVM0020318 | LG7 | vacuolar protein sorting-ass  | not DE   | not DE   | not DE   | not DE  |
| EVM0020960 | LG7 | xanthine dehydrogenase 1-lik  | not DE   | not DE   | not DE   | not DE  |
| EVM0022044 | LG7 | zeaxanthin epoxidase, chloro  | not DE   | not DE   | not DE   | not DE  |
| EVM0004386 | LG7 | zinc finger A20 and AN1 doma  | not DE   | not DE   | not DE   | not DE  |
| EVM0000311 | LG7 | zinc finger CCCH domain-cont  | not DE   | not DE   | not DE   | not DE  |
| EVM0004418 | LG7 | zinc finger CCCH domain-cont  | not DE   | not DE   | not DE   | not DE  |
| EVM0010551 | LG7 | zinc finger CCCH domain-cont  | not DE   | not DE   | not DE   | not DE  |
| EVM0019165 | LG7 | 2-oxoglutarate (2OG) and Fe(I | not DE   | not DE   | not DE   | not DE  |
| EVM0011484 | LG7 | 4-hydroxy-3-methylbut-2-en-1- | not DE   | not DE   | not DE   | not DE  |
| EVM0024671 | LG7 | 4-hydroxy-3-methylbut-2-en-1- | not DE   | not DE   | not DE   | not DE  |
| EVM0003233 | LG7 | 40S ribosomal protein S15-4   | not DE   | not DE   | not DE   | not DE  |
| EVM0015542 | LG7 | 60S ribosomal L30             | not DE   | not DE   | not DE   | not DE  |
| EVM0007634 | LG7 | 60S ribosomal protein L12, pu | not DE   | not DE   | not DE   | not DE  |
| EVM0009494 | LG7 | 60S ribosomal protein L12, pu | not DE   | not DE   | not DE   | not DE  |
| EVM0019696 | LG7 | ABC transporter family protei | not DE   | not DE   | not DE   | not DE  |
| EVM0007083 | LG7 | ACD1-like                     | not DE   | not DE   | not DE   | not DE  |
| EVM0018322 | LG7 | ACD1-like                     | not DE   | not DE   | not DE   | not DE  |
| EVM0023697 | LG7 | ACD1-like                     | -1.94485 | 0.004192 | not DE   | not DE  |
| EVM0015119 | LG7 | AP2/B3-like transcriptional f | not DE   | not DE   | not DE   | not DE  |
| EVM0000600 | LG7 | AT-hook DNA-binding family pr | not DE   | not DE   | not DE   | not DE  |
| EVM0004106 | LG7 | ATP synthase CF0 subunit III  | -2.57962 | 0.005805 | not DE   | not DE  |
| EVM0020694 | LG7 | ATPase, AAA-type, CDC48 prote | not DE   | not DE   | not DE   | not DE  |

|            |     |                                |          |          |          |         |
|------------|-----|--------------------------------|----------|----------|----------|---------|
| EVM0020095 | LG7 | Alpha/beta-Hydrolases superfa  | not DE   | not DE   | not DE   | not DE  |
| EVM0016888 | LG7 | Auxin response factor 4 isofc  | not DE   | not DE   | not DE   | not DE  |
| EVM0017412 | LG7 | BEL1 homeodomain 1, putative   | not DE   | not DE   | not DE   | not DE  |
| EVM0006966 | LG7 | BZIP transcription factor fam  | not DE   | not DE   | not DE   | not DE  |
| EVM0011109 | LG7 | Basic helix-loop-helix protei  | not DE   | not DE   | not DE   | not DE  |
| EVM0023493 | LG7 | Basic helix-loop-helix protei  | not DE   | not DE   | not DE   | not DE  |
| EVM0001662 | LG7 | Basic-leucine zipper transcri  | not DE   | not DE   | not DE   | not DE  |
| EVM0006681 | LG7 | Beta-1,3-galactosyltransferas  | not DE   | not DE   | not DE   | not DE  |
| EVM0016586 | LG7 | Beta-glucosidase 17 isoform 2  | not DE   | not DE   | not DE   | not DE  |
| EVM0000726 | LG7 | Bifunctional inhibitor/lipid-  | not DE   | not DE   | not DE   | not DE  |
| EVM0007401 | LG7 | Bifunctional monodehydroascor  | not DE   | not DE   | not DE   | not DE  |
| EVM0013477 | LG7 | BnaA09g14430D                  | not DE   | not DE   | not DE   | not DE  |
| EVM0005561 | LG7 | BnaC02g00690D                  | not DE   | not DE   | not DE   | not DE  |
| EVM0003348 | LG7 | BnaC04g40780D                  | not DE   | not DE   | not DE   | not DE  |
| EVM0012061 | LG7 | BnaC04g40780D                  | not DE   | not DE   | not DE   | not DE  |
| EVM0022034 | LG7 | BnaUnng00820D                  | -1.31621 | 0.003867 | 1.83409  | 0.01112 |
| EVM0003002 | LG7 | Branched-chain alpha-keto aci  | not DE   | not DE   | not DE   | not DE  |
| EVM0005189 | LG7 | Branched-chain alpha-keto aci  | not DE   | not DE   | not DE   | not DE  |
| EVM0018017 | LG7 | C2H2 and C2HC zinc fingers su  | not DE   | not DE   | not DE   | not DE  |
| EVM0017065 | LG7 | CBL-interacting serine/threon  | not DE   | not DE   | not DE   | not DE  |
| EVM0013307 | LG7 | Calcium-dependent lipid-bindin | not DE   | not DE   | not DE   | not DE  |
| EVM0014337 | LG7 | Calcium-dependent protein kin  | not DE   | not DE   | not DE   | not DE  |
| EVM0018424 | LG7 | Calcium-dependent protein kin  | not DE   | not DE   | not DE   | not DE  |
| EVM0001967 | LG7 | Casparian strip membrane prot  | not DE   | not DE   | not DE   | not DE  |
| EVM0020617 | LG7 | Chaperone DnaJ                 | not DE   | not DE   | not DE   | not DE  |
| EVM0011663 | LG7 | Chaperonin-like RbcX protein   | not DE   | not DE   | not DE   | not DE  |
| EVM0020203 | LG7 | Chaperonin-like RbcX protein   | not DE   | not DE   | not DE   | not DE  |
| EVM0006682 | LG7 | Chitinase 1                    | not DE   | not DE   | not DE   | not DE  |
| EVM0020332 | LG7 | Chitinase 1                    | not DE   | not DE   | not DE   | not DE  |
| EVM0001331 | LG7 | Chromatin remodeling complex   | not DE   | not DE   | not DE   | not DE  |
| EVM0003160 | LG7 | Chromodomain-helicase-DNA-bin  | not DE   | not DE   | not DE   | not DE  |
| EVM0013784 | LG7 | Cinnamyl-alcohol dehydrogenas  | -1.03586 | 6.31E-09 | not DE   | not DE  |
| EVM0021565 | LG7 | Cucumisin precursor, putative  | not DE   | not DE   | -1.99555 | 0.00738 |
| EVM0022193 | LG7 | Cyclin-like family protein     | not DE   | not DE   | not DE   | not DE  |
| EVM0006460 | LG7 | Cyclophilin71 isoform 2        | not DE   | not DE   | not DE   | not DE  |
| EVM0022080 | LG7 | Cys/Met metabolism pyridoxal-  | not DE   | not DE   | not DE   | not DE  |
| EVM0012948 | LG7 | Cytochrome P450 78A3           | not DE   | not DE   | not DE   | not DE  |
| EVM0021796 | LG7 | Cytochrome P450 78A3           | not DE   | not DE   | not DE   | not DE  |
| EVM0010852 | LG7 | DNA binding protein, putative  | not DE   | not DE   | not DE   | not DE  |
| EVM0016133 | LG7 | DNA-directed RNA polymerase I  | not DE   | not DE   | not DE   | not DE  |
| EVM0012891 | LG7 | DNA/RNA polymerases superfam   | not DE   | not DE   | not DE   | not DE  |
| EVM0001971 | LG7 | Dead box ATP-dependent RNA he  | not DE   | not DE   | not DE   | not DE  |
| EVM0006095 | LG7 | Decoy isoform 2, partial       | not DE   | not DE   | not DE   | not DE  |
| EVM0017690 | LG7 | Disease resistance-responsive  | not DE   | not DE   | not DE   | not DE  |
| EVM0022095 | LG7 | Disease resistance-responsive  | not DE   | not DE   | not DE   | not DE  |
| EVM0015881 | LG7 | DnaJ/Hsp40 cysteine-rich doma  | not DE   | not DE   | not DE   | not DE  |
| EVM0002163 | LG7 | E2F/DP family winged-helix DN  | not DE   | not DE   | not DE   | not DE  |
| EVM0002762 | LG7 | E2F/DP family winged-helix DN  | not DE   | not DE   | not DE   | not DE  |
| EVM0015373 | LG7 | Exocyst subunit exo70 family   | not DE   | not DE   | -1.97661 | #####   |
| EVM0013851 | LG7 | F-box family protein, putativ  | not DE   | not DE   | not DE   | not DE  |
| EVM0018897 | LG7 | F-box family protein, putativ  | not DE   | not DE   | not DE   | not DE  |
| EVM0014068 | LG7 | F&apos;H1                      | not DE   | not DE   | not DE   | not DE  |
| EVM0005799 | LG7 | Gb:AAF02129.1, putative        | not DE   | not DE   | 1.894549 | 0.00154 |
| EVM0004197 | LG7 | Geminivirus rep interacting k  | not DE   | not DE   | not DE   | not DE  |

|            |     |                                |        |        |          |         |
|------------|-----|--------------------------------|--------|--------|----------|---------|
| EVM0005532 | LG7 | Glyoxal oxidase-related prote  | not DE | not DE | not DE   | not DE  |
| EVM0021616 | LG7 | Glyoxal oxidase-related prote  | not DE | not DE | not DE   | not DE  |
| EVM0011404 | LG7 | Heat shock transcription fact  | not DE | not DE | not DE   | not DE  |
| EVM0002889 | LG7 | Heterogeneous nuclear ribonuc  | not DE | not DE | not DE   | not DE  |
| EVM0024075 | LG7 | Histone H2A 12 isoform 1       | not DE | not DE | 1.376188 | 0.04109 |
| EVM0007529 | LG7 | Homeobox 7, putative           | not DE | not DE | not DE   | not DE  |
| EVM0020396 | LG7 | Homeobox 7, putative           | not DE | not DE | not DE   | not DE  |
| EVM0011107 | LG7 | Homeodomain-like superfamily   | not DE | not DE | not DE   | not DE  |
| EVM0017920 | LG7 | Kinase superfamily protein is  | not DE | not DE | not DE   | not DE  |
| EVM0001430 | LG7 | Kiwellin                       | not DE | not DE | not DE   | not DE  |
| EVM0022604 | LG7 | Kiwellin, putative             | not DE | not DE | not DE   | not DE  |
| EVM0016103 | LG7 | LRR receptor-like serine/thre  | not DE | not DE | not DE   | not DE  |
| EVM0003697 | LG7 | Laccase                        | not DE | not DE | not DE   | not DE  |
| EVM0020325 | LG7 | Laccase                        | not DE | not DE | not DE   | not DE  |
| EVM0017009 | LG7 | Laccase 17                     | not DE | not DE | not DE   | not DE  |
| EVM0005648 | LG7 | Lateral root primordium prote  | not DE | not DE | not DE   | not DE  |
| EVM0012148 | LG7 | Leucine-rich repeat transmemb  | not DE | not DE | not DE   | not DE  |
| EVM0021500 | LG7 | Lipid binding protein, putati  | not DE | not DE | not DE   | not DE  |
| EVM0008030 | LG7 | Lipoyltransferase 2 isoform 1  | not DE | not DE | not DE   | not DE  |
| EVM0013225 | LG7 | Lysosomal Pro-X carboxypeptid  | not DE | not DE | not DE   | not DE  |
| EVM0002319 | LG7 | MORN repeat-containing protei  | not DE | not DE | not DE   | not DE  |
| EVM0004739 | LG7 | Mitochondrial import inner me  | not DE | not DE | not DE   | not DE  |
| EVM0008271 | LG7 | Myb domain protein 5 isoform   | not DE | not DE | not DE   | not DE  |
| EVM0009693 | LG7 | Myb domain protein 59 isoform  | not DE | not DE | not DE   | not DE  |
| EVM0011387 | LG7 | NAC domain-containing protei   | not DE | not DE | not DE   | not DE  |
| EVM0002732 | LG7 | NAC transcription factor 037   | not DE | not DE | not DE   | not DE  |
| EVM0016212 | LG7 | NAC transcription factor 037   | not DE | not DE | not DE   | not DE  |
| EVM0019722 | LG7 | NAC transcription factor 037   | not DE | not DE | not DE   | not DE  |
| EVM0001109 | LG7 | NAD kinase 1 isoform 1         | not DE | not DE | not DE   | not DE  |
| EVM0018259 | LG7 | NADH dehydrogenase subunit 4L  | not DE | not DE | not DE   | not DE  |
| EVM0004733 | LG7 | NOT2 / NOT3 / NOT5 family isc  | not DE | not DE | not DE   | not DE  |
| EVM0024114 | LG7 | Nitrate excretion transporter  | not DE | not DE | not DE   | not DE  |
| EVM0007470 | LG7 | Peroxidase superfamily protei  | not DE | not DE | not DE   | not DE  |
| EVM0010174 | LG7 | Plasma membrane intrinsic pro  | not DE | not DE | not DE   | not DE  |
| EVM0010414 | LG7 | Plasma membrane intrinsic pro  | not DE | not DE | not DE   | not DE  |
| EVM0007092 | LG7 | Plastid ribosomal protein 11l  | not DE | not DE | not DE   | not DE  |
| EVM0016965 | LG7 | Polynucleotidyl transferase,   | not DE | not DE | -1.25778 | 0.03449 |
| EVM0021038 | LG7 | Proteasome family protein isc  | not DE | not DE | not DE   | not DE  |
| EVM0008621 | LG7 | Protein IQ-DOMAIN 14 -like pr  | not DE | not DE | not DE   | not DE  |
| EVM0009698 | LG7 | Protein kinase APK1B, chlorop  | not DE | not DE | not DE   | not DE  |
| EVM0012796 | LG7 | Protein kinase APK1B, chlorop  | not DE | not DE | not DE   | not DE  |
| EVM0023878 | LG7 | RING-H2 finger protein ATL79,  | not DE | not DE | not DE   | not DE  |
| EVM0013369 | LG7 | Rab2                           | not DE | not DE | not DE   | not DE  |
| EVM0022935 | LG7 | RecName: Full=S-adenosylmethi  | not DE | not DE | not DE   | not DE  |
| EVM0001643 | LG7 | Rieske (2Fe-2S) domain-contain | not DE | not DE | not DE   | not DE  |
| EVM0005431 | LG7 | Rieske (2Fe-2S) domain-contain | not DE | not DE | not DE   | not DE  |
| EVM0002822 | LG7 | S-adenosyl-L-methionine-depen  | not DE | not DE | not DE   | not DE  |
| EVM0006854 | LG7 | S-adenosyl-L-methionine-depen  | not DE | not DE | not DE   | not DE  |
| EVM0010316 | LG7 | S-adenosyl-L-methionine-depen  | not DE | not DE | not DE   | not DE  |
| EVM0010389 | LG7 | S-adenosyl-L-methionine-depen  | not DE | not DE | not DE   | not DE  |
| EVM0013576 | LG7 | S-adenosyl-L-methionine-depen  | not DE | not DE | not DE   | not DE  |
| EVM0017669 | LG7 | S-adenosyl-L-methionine-depen  | not DE | not DE | not DE   | not DE  |
| EVM0018461 | LG7 | S-adenosyl-L-methionine-depen  | not DE | not DE | not DE   | not DE  |
| EVM0019938 | LG7 | S-adenosyl-L-methionine-depen  | not DE | not DE | not DE   | not DE  |

|            |     |                                  |          |          |          |         |
|------------|-----|----------------------------------|----------|----------|----------|---------|
| EVM0021563 | LG7 | S-adenosyl-L-methionine-dependen | not DE   | not DE   | not DE   | not DE  |
| EVM0022390 | LG7 | S-adenosyl-L-methionine-dependen | not DE   | not DE   | not DE   | not DE  |
| EVM0022597 | LG7 | S-adenosyl-L-methionine-dependen | not DE   | not DE   | not DE   | not DE  |
| EVM0003080 | LG7 | Saccharopine dehydrogenase is    | not DE   | not DE   | not DE   | not DE  |
| EVM0009579 | LG7 | Scarecrow-like 3                 | not DE   | not DE   | not DE   | not DE  |
| EVM0023492 | LG7 | Serine/threonine-protein kin     | not DE   | not DE   | not DE   | not DE  |
| EVM0007685 | LG7 | Seven in absentia of 2 isoform   | not DE   | not DE   | not DE   | not DE  |
| EVM0004325 | LG7 | Seven transmembrane MLO famil    | not DE   | not DE   | not DE   | not DE  |
| EVM0001501 | LG7 | Structural maintenance of chr    | not DE   | not DE   | not DE   | not DE  |
| EVM0009577 | LG7 | T-complex protein 1 subunit e    | not DE   | not DE   | not DE   | not DE  |
| EVM0005304 | LG7 | TCP-1/cpn60 chaperonin family    | not DE   | not DE   | not DE   | not DE  |
| EVM0016042 | LG7 | TCP-1/cpn60 chaperonin family    | not DE   | not DE   | not DE   | not DE  |
| EVM0015887 | LG7 | Tetratricopeptide repeat-like    | not DE   | not DE   | -1.41161 | 0.02817 |
| EVM0021743 | LG7 | Topoisomerase 6 subunit B is     | not DE   | not DE   | not DE   | not DE  |
| EVM0016796 | LG7 | Transcription factor             | not DE   | not DE   | not DE   | not DE  |
| EVM0014805 | LG7 | Transducin/WD40 repeat-like s    | not DE   | not DE   | not DE   | not DE  |
| EVM0021790 | LG7 | Transducin/WD40 repeat-like s    | not DE   | not DE   | not DE   | not DE  |
| EVM0009253 | LG7 | Transmembrane amino acid tran    | not DE   | not DE   | not DE   | not DE  |
| EVM0012384 | LG7 | Tryptophan/tyrosine permease     | not DE   | not DE   | not DE   | not DE  |
| EVM0001611 | LG7 | Two-component response regula    | not DE   | not DE   | not DE   | not DE  |
| EVM0006057 | LG7 | UDP-Glycosyltransferase super    | not DE   | not DE   | not DE   | not DE  |
| EVM0001154 | LG7 | UDP-Glycosyltransferase super    | not DE   | not DE   | not DE   | not DE  |
| EVM0019147 | LG7 | UDP-N-acetylglucosamine trans    | not DE   | not DE   | not DE   | not DE  |
| EVM0000351 | LG7 | Ubiquitin-associated/translat    | not DE   | not DE   | not DE   | not DE  |
| EVM0023254 | LG7 | Ubiquitin-associated/translat    | not DE   | not DE   | not DE   | not DE  |
| EVM0022069 | LG7 | Uncharacterized protein TCM_C    | not DE   | not DE   | not DE   | not DE  |
| EVM0000459 | LG7 | Uncharacterized protein TCM_C    | not DE   | not DE   | not DE   | not DE  |
| EVM0016367 | LG7 | Uncharacterized protein TCM_C    | not DE   | not DE   | 1.854934 | #####   |
| EVM0021247 | LG7 | Uncharacterized protein TCM_C    | not DE   | not DE   | not DE   | not DE  |
| EVM0023350 | LG7 | Uncharacterized protein TCM_C    | not DE   | not DE   | not DE   | not DE  |
| EVM0021762 | LG7 | Uncharacterized protein TCM_C    | not DE   | not DE   | not DE   | not DE  |
| EVM0012326 | LG7 | Uncharacterized protein TCM_C    | not DE   | not DE   | not DE   | not DE  |
| EVM0015332 | LG7 | Uncharacterized protein TCM_C    | not DE   | not DE   | not DE   | not DE  |
| EVM0022844 | LG7 | Uncharacterized protein TCM_C    | not DE   | not DE   | not DE   | not DE  |
| EVM0003236 | LG7 | Uncharacterized protein TCM_C    | not DE   | not DE   | not DE   | not DE  |
| EVM0021366 | LG7 | Uncharacterized protein TCM_C    | not DE   | not DE   | not DE   | not DE  |
| EVM0003964 | LG7 | Uncharacterized protein TCM_C    | not DE   | not DE   | not DE   | not DE  |
| EVM0012678 | LG7 | Uncharacterized protein TCM_C    | not DE   | not DE   | not DE   | not DE  |
| EVM0011023 | LG7 | Uncharacterized protein TCM_C    | not DE   | not DE   | not DE   | not DE  |
| EVM0007309 | LG7 | Uncharacterized protein TCM_C    | not DE   | not DE   | not DE   | not DE  |
| EVM0001007 | LG7 | Uncharacterized protein TCM_C    | not DE   | not DE   | not DE   | not DE  |
| EVM0016631 | LG7 | Uncharacterized protein TCM_C    | not DE   | not DE   | not DE   | not DE  |
| EVM0000450 | LG7 | Vesicle-associated membrane p    | not DE   | not DE   | not DE   | not DE  |
| EVM0007551 | LG7 | WAS/WASL-interacting protein     | not DE   | not DE   | not DE   | not DE  |
| EVM0001212 | LG7 | WIP domain protein 3             | not DE   | not DE   | not DE   | not DE  |
| EVM0005841 | LG7 | WRKY transcription factor 60     | not DE   | not DE   | not DE   | not DE  |
| EVM0022387 | LG7 | WRKY transcription factor 60     | not DE   | not DE   | not DE   | not DE  |
| EVM0008129 | LG7 | Zinc finger C-x8-C-x5-C-x3-H     | -3.74766 | 1.35E-09 | -2.31121 | 0.00081 |
| EVM0022686 | LG7 | Zinc finger family protein /     | not DE   | not DE   | not DE   | not DE  |
| EVM0003124 | LG7 | actin-depolymerizing factor      | not DE   | not DE   | not DE   | not DE  |
| EVM0000629 | LG7 | acyl CoA reductase family pro    | not DE   | not DE   | not DE   | not DE  |
| EVM0003559 | LG7 | acyl CoA reductase family pro    | not DE   | not DE   | not DE   | not DE  |
| EVM0012566 | LG7 | aquaporin protein 6              | 1.96617  | 0.0231   | not DE   | not DE  |
| EVM0017840 | LG7 | argonaute 5                      | not DE   | not DE   | not DE   | not DE  |

|            |     |                               |          |         |          |         |
|------------|-----|-------------------------------|----------|---------|----------|---------|
| EVM0010888 | LG7 | arsenite-resistance protein,  | not DE   | not DE  | not DE   | not DE  |
| EVM0003726 | LG7 | calcium-dependent protein kin | not DE   | not DE  | not DE   | not DE  |
| EVM0023386 | LG7 | calcium-dependent protein kin | not DE   | not DE  | not DE   | not DE  |
| EVM0001329 | LG7 | catalytic, putative           | not DE   | not DE  | not DE   | not DE  |
| EVM0004269 | LG7 | catalytic, putative           | not DE   | not DE  | not DE   | not DE  |
| EVM0023231 | LG7 | cation-transporting atpase 13 | not DE   | not DE  | not DE   | not DE  |
| EVM0014172 | LG7 | chloroplast ferredoxin-3      | not DE   | not DE  | not DE   | not DE  |
| EVM0004353 | LG7 | conserved hypothetical protei | not DE   | not DE  | not DE   | not DE  |
| EVM0005854 | LG7 | conserved hypothetical protei | not DE   | not DE  | 1.366968 | #####   |
| EVM0015099 | LG7 | conserved hypothetical protei | not DE   | not DE  | not DE   | not DE  |
| EVM0017543 | LG7 | conserved hypothetical protei | not DE   | not DE  | not DE   | not DE  |
| EVM0018690 | LG7 | conserved hypothetical protei | -2.21371 | 0.01102 | not DE   | not DE  |
| EVM0020209 | LG7 | conserved hypothetical protei | not DE   | not DE  | not DE   | not DE  |
| EVM0020472 | LG7 | conserved hypothetical protei | not DE   | not DE  | not DE   | not DE  |
| EVM0024134 | LG7 | conserved hypothetical protei | not DE   | not DE  | not DE   | not DE  |
| EVM0017026 | LG7 | cop9 signalosome complex subu | not DE   | not DE  | not DE   | not DE  |
| EVM0015387 | LG7 | copia-type polyprotein, putat | not DE   | not DE  | not DE   | not DE  |
| EVM0016850 | LG7 | cytochrome oxidase subunit 2  | not DE   | not DE  | not DE   | not DE  |
| EVM0008709 | LG7 | elongation factor 1-alpha, pu | not DE   | not DE  | -1.13421 | #####   |
| EVM0024003 | LG7 | elongation factor 1-alpha, pu | not DE   | not DE  | not DE   | not DE  |
| EVM0022330 | LG7 | gibberellin induced protein   | not DE   | not DE  | not DE   | not DE  |
| EVM0005063 | LG7 | hypothetical protein AMTR_s00 | not DE   | not DE  | not DE   | not DE  |
| EVM0022728 | LG7 | hypothetical protein AMTR_s05 | not DE   | not DE  | not DE   | not DE  |
| EVM0023294 | LG7 | hypothetical protein CARUB_vl | not DE   | not DE  | not DE   | not DE  |
| EVM0000493 | LG7 | hypothetical protein CARUB_vl | not DE   | not DE  | 2.191281 | 0.02128 |
| EVM0016193 | LG7 | hypothetical protein CICLE_vl | not DE   | not DE  | not DE   | not DE  |
| EVM0007283 | LG7 | hypothetical protein CICLE_vl | not DE   | not DE  | not DE   | not DE  |
| EVM0010634 | LG7 | hypothetical protein CICLE_vl | not DE   | not DE  | not DE   | not DE  |
| EVM0011185 | LG7 | hypothetical protein CICLE_vl | not DE   | not DE  | not DE   | not DE  |
| EVM0011468 | LG7 | hypothetical protein CICLE_vl | not DE   | not DE  | not DE   | not DE  |
| EVM0001403 | LG7 | hypothetical protein CICLE_vl | not DE   | not DE  | not DE   | not DE  |
| EVM0017613 | LG7 | hypothetical protein CICLE_vl | not DE   | not DE  | not DE   | not DE  |
| EVM0014415 | LG7 | hypothetical protein CICLE_vl | not DE   | not DE  | not DE   | not DE  |
| EVM0018028 | LG7 | hypothetical protein CICLE_vl | not DE   | not DE  | not DE   | not DE  |
| EVM0004880 | LG7 | hypothetical protein CICLE_vl | not DE   | not DE  | not DE   | not DE  |
| EVM0023133 | LG7 | hypothetical protein CICLE_vl | not DE   | not DE  | not DE   | not DE  |
| EVM0014876 | LG7 | hypothetical protein CICLE_vl | not DE   | not DE  | not DE   | not DE  |
| EVM0016637 | LG7 | hypothetical protein CICLE_vl | not DE   | not DE  | not DE   | not DE  |
| EVM0006047 | LG7 | hypothetical protein CICLE_vl | not DE   | not DE  | not DE   | not DE  |
| EVM0015619 | LG7 | hypothetical protein CICLE_vl | not DE   | not DE  | not DE   | not DE  |
| EVM0022683 | LG7 | hypothetical protein CICLE_vl | not DE   | not DE  | not DE   | not DE  |
| EVM0001395 | LG7 | hypothetical protein CICLE_vl | not DE   | not DE  | -1.83508 | #####   |
| EVM0018779 | LG7 | hypothetical protein CICLE_vl | not DE   | not DE  | not DE   | not DE  |
| EVM0022373 | LG7 | hypothetical protein CICLE_vl | not DE   | not DE  | not DE   | not DE  |
| EVM0014821 | LG7 | hypothetical protein CICLE_vl | not DE   | not DE  | not DE   | not DE  |
| EVM0003734 | LG7 | hypothetical protein CICLE_vl | not DE   | not DE  | not DE   | not DE  |
| EVM0004167 | LG7 | hypothetical protein CICLE_vl | not DE   | not DE  | not DE   | not DE  |
| EVM0006471 | LG7 | hypothetical protein CICLE_vl | not DE   | not DE  | not DE   | not DE  |
| EVM0008402 | LG7 | hypothetical protein CICLE_vl | not DE   | not DE  | not DE   | not DE  |
| EVM0010213 | LG7 | hypothetical protein CICLE_vl | not DE   | not DE  | not DE   | not DE  |
| EVM0012775 | LG7 | hypothetical protein CICLE_vl | not DE   | not DE  | not DE   | not DE  |
| EVM0023831 | LG7 | hypothetical protein CICLE_vl | not DE   | not DE  | -1.05908 | #####   |
| EVM0017906 | LG7 | hypothetical protein CICLE_vl | not DE   | not DE  | not DE   | not DE  |
| EVM0001493 | LG7 | hypothetical protein CICLE_vl | not DE   | not DE  | not DE   | not DE  |



|            |     |                               |          |          |          |         |
|------------|-----|-------------------------------|----------|----------|----------|---------|
| EVM0003980 | LG7 | hypothetical protein CICLE_v1 | not DE   | not DE   | not DE   | not DE  |
| EVM0020301 | LG7 | hypothetical protein CICLE_v1 | not DE   | not DE   | not DE   | not DE  |
| EVM0017771 | LG7 | hypothetical protein CICLE_v1 | not DE   | not DE   | not DE   | not DE  |
| EVM0012243 | LG7 | hypothetical protein CICLE_v1 | not DE   | not DE   | not DE   | not DE  |
| EVM0007135 | LG7 | hypothetical protein CICLE_v1 | not DE   | not DE   | not DE   | not DE  |
| EVM0003741 | LG7 | hypothetical protein CICLE_v1 | not DE   | not DE   | not DE   | not DE  |
| EVM0014427 | LG7 | hypothetical protein CICLE_v1 | not DE   | not DE   | not DE   | not DE  |
| EVM0014023 | LG7 | hypothetical protein CICLE_v1 | not DE   | not DE   | not DE   | not DE  |
| EVM0002194 | LG7 | hypothetical protein CICLE_v1 | not DE   | not DE   | not DE   | not DE  |
| EVM0004524 | LG7 | hypothetical protein CICLE_v1 | not DE   | not DE   | not DE   | not DE  |
| EVM0020670 | LG7 | hypothetical protein CICLE_v1 | -1.87819 | 5.04E-07 | -2.87318 | #####   |
| EVM0022455 | LG7 | hypothetical protein CICLE_v1 | not DE   | not DE   | not DE   | not DE  |
| EVM0023070 | LG7 | hypothetical protein CICLE_v1 | not DE   | not DE   | not DE   | not DE  |
| EVM0007907 | LG7 | hypothetical protein CICLE_v1 | not DE   | not DE   | not DE   | not DE  |
| EVM0023721 | LG7 | hypothetical protein CICLE_v1 | not DE   | not DE   | not DE   | not DE  |
| EVM0013114 | LG7 | hypothetical protein CICLE_v1 | not DE   | not DE   | not DE   | not DE  |
| EVM0014358 | LG7 | hypothetical protein CICLE_v1 | not DE   | not DE   | not DE   | not DE  |
| EVM0021233 | LG7 | hypothetical protein CICLE_v1 | not DE   | not DE   | not DE   | not DE  |
| EVM0010328 | LG7 | hypothetical protein CICLE_v1 | not DE   | not DE   | not DE   | not DE  |
| EVM0023587 | LG7 | hypothetical protein CICLE_v1 | not DE   | not DE   | not DE   | not DE  |
| EVM0011078 | LG7 | hypothetical protein CICLE_v1 | not DE   | not DE   | not DE   | not DE  |
| EVM0000963 | LG7 | hypothetical protein CICLE_v1 | -1.10711 | 0.022055 | -1.17977 | 0.00043 |
| EVM0000107 | LG7 | hypothetical protein CICLE_v1 | not DE   | not DE   | not DE   | not DE  |
| EVM0022073 | LG7 | hypothetical protein CICLE_v1 | not DE   | not DE   | not DE   | not DE  |
| EVM0003342 | LG7 | hypothetical protein CICLE_v1 | not DE   | not DE   | not DE   | not DE  |
| EVM0012108 | LG7 | hypothetical protein CICLE_v1 | not DE   | not DE   | not DE   | not DE  |
| EVM0007206 | LG7 | hypothetical protein CICLE_v1 | not DE   | not DE   | not DE   | not DE  |
| EVM0009197 | LG7 | hypothetical protein CICLE_v1 | not DE   | not DE   | 3.564797 | 0.00218 |
| EVM0007897 | LG7 | hypothetical protein CICLE_v1 | not DE   | not DE   | not DE   | not DE  |
| EVM0015124 | LG7 | hypothetical protein CICLE_v1 | not DE   | not DE   | not DE   | not DE  |
| EVM0004452 | LG7 | hypothetical protein CICLE_v1 | not DE   | not DE   | not DE   | not DE  |
| EVM0005123 | LG7 | hypothetical protein CICLE_v1 | not DE   | not DE   | not DE   | not DE  |
| EVM0019310 | LG7 | hypothetical protein CICLE_v1 | not DE   | not DE   | not DE   | not DE  |
| EVM0003994 | LG7 | hypothetical protein CICLE_v1 | not DE   | not DE   | not DE   | not DE  |
| EVM0013026 | LG7 | hypothetical protein CICLE_v1 | -1.01027 | 0.007356 | not DE   | not DE  |
| EVM0024354 | LG7 | hypothetical protein CICLE_v1 | not DE   | not DE   | not DE   | not DE  |
| EVM0019870 | LG7 | hypothetical protein CICLE_v1 | not DE   | not DE   | not DE   | not DE  |
| EVM0005252 | LG7 | hypothetical protein CICLE_v1 | not DE   | not DE   | -1.27067 | 0.01695 |
| EVM0015275 | LG7 | hypothetical protein CICLE_v1 | not DE   | not DE   | not DE   | not DE  |
| EVM0017703 | LG7 | hypothetical protein CICLE_v1 | not DE   | not DE   | not DE   | not DE  |
| EVM0012661 | LG7 | hypothetical protein CICLE_v1 | not DE   | not DE   | not DE   | not DE  |
| EVM0003217 | LG7 | hypothetical protein CICLE_v1 | not DE   | not DE   | not DE   | not DE  |
| EVM0011503 | LG7 | hypothetical protein CICLE_v1 | not DE   | not DE   | not DE   | not DE  |
| EVM0020803 | LG7 | hypothetical protein CICLE_v1 | not DE   | not DE   | not DE   | not DE  |
| EVM0008187 | LG7 | hypothetical protein CICLE_v1 | not DE   | not DE   | not DE   | not DE  |
| EVM0001674 | LG7 | hypothetical protein CICLE_v1 | not DE   | not DE   | not DE   | not DE  |
| EVM0008843 | LG7 | hypothetical protein CICLE_v1 | not DE   | not DE   | not DE   | not DE  |
| EVM0013362 | LG7 | hypothetical protein CICLE_v1 | not DE   | not DE   | not DE   | not DE  |
| EVM0022951 | LG7 | hypothetical protein CICLE_v1 | not DE   | not DE   | not DE   | not DE  |
| EVM0018811 | LG7 | hypothetical protein CICLE_v1 | not DE   | not DE   | not DE   | not DE  |
| EVM0000997 | LG7 | hypothetical protein CICLE_v1 | not DE   | not DE   | not DE   | not DE  |
| EVM0024621 | LG7 | hypothetical protein CICLE_v1 | not DE   | not DE   | not DE   | not DE  |
| EVM0010673 | LG7 | hypothetical protein CICLE_v1 | not DE   | not DE   | not DE   | not DE  |
| EVM0012507 | LG7 | hypothetical protein CICLE_v1 | not DE   | not DE   | not DE   | not DE  |

|            |     |                               |          |          |          |         |
|------------|-----|-------------------------------|----------|----------|----------|---------|
| EVM0022922 | LG7 | hypothetical protein CICLE_v1 | not DE   | not DE   | 2.267954 | 0.01333 |
| EVM0015250 | LG7 | hypothetical protein CICLE_v1 | not DE   | not DE   | not DE   | not DE  |
| EVM0013462 | LG7 | hypothetical protein CICLE_v1 | not DE   | not DE   | not DE   | not DE  |
| EVM0022663 | LG7 | hypothetical protein CICLE_v1 | not DE   | not DE   | not DE   | not DE  |
| EVM0004455 | LG7 | hypothetical protein CICLE_v1 | not DE   | not DE   | not DE   | not DE  |
| EVM0012527 | LG7 | hypothetical protein CICLE_v1 | not DE   | not DE   | 1.341802 | 0.00133 |
| EVM0015946 | LG7 | hypothetical protein CICLE_v1 | not DE   | not DE   | not DE   | not DE  |
| EVM0023305 | LG7 | hypothetical protein CICLE_v1 | not DE   | not DE   | -2.11219 | #####   |
| EVM0010220 | LG7 | hypothetical protein CICLE_v1 | not DE   | not DE   | not DE   | not DE  |
| EVM0013692 | LG7 | hypothetical protein CICLE_v1 | not DE   | not DE   | not DE   | not DE  |
| EVM0006984 | LG7 | hypothetical protein CICLE_v1 | not DE   | not DE   | not DE   | not DE  |
| EVM0008787 | LG7 | hypothetical protein CICLE_v1 | 1.768894 | 0.028972 | not DE   | not DE  |
| EVM0000911 | LG7 | hypothetical protein CICLE_v1 | not DE   | not DE   | not DE   | not DE  |
| EVM0004120 | LG7 | hypothetical protein CICLE_v1 | not DE   | not DE   | not DE   | not DE  |
| EVM0004328 | LG7 | hypothetical protein CICLE_v1 | not DE   | not DE   | not DE   | not DE  |
| EVM0014676 | LG7 | hypothetical protein CICLE_v1 | not DE   | not DE   | not DE   | not DE  |
| EVM0010570 | LG7 | hypothetical protein CICLE_v1 | not DE   | not DE   | not DE   | not DE  |
| EVM0015063 | LG7 | hypothetical protein CICLE_v1 | not DE   | not DE   | not DE   | not DE  |
| EVM0010472 | LG7 | hypothetical protein CICLE_v1 | not DE   | not DE   | not DE   | not DE  |
| EVM0004430 | LG7 | hypothetical protein CICLE_v1 | not DE   | not DE   | not DE   | not DE  |
| EVM0013506 | LG7 | hypothetical protein CICLE_v1 | not DE   | not DE   | not DE   | not DE  |
| EVM0020063 | LG7 | hypothetical protein CICLE_v1 | not DE   | not DE   | not DE   | not DE  |
| EVM0021810 | LG7 | hypothetical protein CICLE_v1 | not DE   | not DE   | not DE   | not DE  |
| EVM0011798 | LG7 | hypothetical protein CICLE_v1 | not DE   | not DE   | not DE   | not DE  |
| EVM0004185 | LG7 | hypothetical protein CICLE_v1 | not DE   | not DE   | not DE   | not DE  |
| EVM0007787 | LG7 | hypothetical protein CICLE_v1 | -2.99656 | 0.002663 | not DE   | not DE  |
| EVM0010180 | LG7 | hypothetical protein CICLE_v1 | not DE   | not DE   | not DE   | not DE  |
| EVM0022493 | LG7 | hypothetical protein CICLE_v1 | not DE   | not DE   | 1.866194 | 0.01551 |
| EVM0014182 | LG7 | hypothetical protein CICLE_v1 | not DE   | not DE   | not DE   | not DE  |
| EVM0021973 | LG7 | hypothetical protein CICLE_v1 | not DE   | not DE   | not DE   | not DE  |
| EVM0014579 | LG7 | hypothetical protein CICLE_v1 | not DE   | not DE   | not DE   | not DE  |
| EVM0010271 | LG7 | hypothetical protein CICLE_v1 | not DE   | not DE   | not DE   | not DE  |
| EVM0008834 | LG7 | hypothetical protein CICLE_v1 | not DE   | not DE   | not DE   | not DE  |
| EVM0010731 | LG7 | hypothetical protein CICLE_v1 | not DE   | not DE   | not DE   | not DE  |
| EVM0008026 | LG7 | hypothetical protein CICLE_v1 | not DE   | not DE   | not DE   | not DE  |
| EVM0009262 | LG7 | hypothetical protein CICLE_v1 | not DE   | not DE   | not DE   | not DE  |
| EVM0022282 | LG7 | hypothetical protein CICLE_v1 | not DE   | not DE   | not DE   | not DE  |
| EVM0005246 | LG7 | hypothetical protein CICLE_v1 | not DE   | not DE   | not DE   | not DE  |
| EVM0006533 | LG7 | hypothetical protein CICLE_v1 | not DE   | not DE   | not DE   | not DE  |
| EVM0012703 | LG7 | hypothetical protein CICLE_v1 | not DE   | not DE   | not DE   | not DE  |
| EVM0013936 | LG7 | hypothetical protein CICLE_v1 | not DE   | not DE   | not DE   | not DE  |
| EVM0020161 | LG7 | hypothetical protein CICLE_v1 | not DE   | not DE   | not DE   | not DE  |
| EVM0003101 | LG7 | hypothetical protein CICLE_v1 | not DE   | not DE   | not DE   | not DE  |
| EVM0001780 | LG7 | hypothetical protein CICLE_v1 | not DE   | not DE   | not DE   | not DE  |
| EVM0018801 | LG7 | hypothetical protein CICLE_v1 | not DE   | not DE   | not DE   | not DE  |
| EVM0019580 | LG7 | hypothetical protein CICLE_v1 | not DE   | not DE   | not DE   | not DE  |
| EVM0012330 | LG7 | hypothetical protein CICLE_v1 | not DE   | not DE   | not DE   | not DE  |
| EVM0016173 | LG7 | hypothetical protein CICLE_v1 | -2.50671 | 0.000915 | not DE   | not DE  |
| EVM0021240 | LG7 | hypothetical protein CICLE_v1 | not DE   | not DE   | not DE   | not DE  |
| EVM0003721 | LG7 | hypothetical protein CICLE_v1 | not DE   | not DE   | not DE   | not DE  |
| EVM0011436 | LG7 | hypothetical protein CICLE_v1 | not DE   | not DE   | not DE   | not DE  |
| EVM0011009 | LG7 | hypothetical protein CICLE_v1 | not DE   | not DE   | not DE   | not DE  |
| EVM0001921 | LG7 | hypothetical protein CICLE_v1 | not DE   | not DE   | not DE   | not DE  |
| EVM0004456 | LG7 | hypothetical protein CICLE_v1 | not DE   | not DE   | -1.0225  | 0.00051 |

|            |     |                               |          |          |          |         |
|------------|-----|-------------------------------|----------|----------|----------|---------|
| EVM0018302 | LG7 | hypothetical protein CICLE_v1 | not DE   | not DE   | -1.04441 | 0.00011 |
| EVM0003447 | LG7 | hypothetical protein CICLE_v1 | not DE   | not DE   | not DE   | not DE  |
| EVM0019878 | LG7 | hypothetical protein CICLE_v1 | not DE   | not DE   | -8.49922 | #####   |
| EVM0007268 | LG7 | hypothetical protein CICLE_v1 | not DE   | not DE   | not DE   | not DE  |
| EVM0003031 | LG7 | hypothetical protein CICLE_v1 | not DE   | not DE   | not DE   | not DE  |
| EVM0010715 | LG7 | hypothetical protein CICLE_v1 | -1.89622 | 0.03411  | not DE   | not DE  |
| EVM0022581 | LG7 | hypothetical protein CICLE_v1 | not DE   | not DE   | not DE   | not DE  |
| EVM0007800 | LG7 | hypothetical protein CICLE_v1 | not DE   | not DE   | not DE   | not DE  |
| EVM0016673 | LG7 | hypothetical protein CICLE_v1 | not DE   | not DE   | not DE   | not DE  |
| EVM0016243 | LG7 | hypothetical protein CICLE_v1 | not DE   | not DE   | 1.438779 | 0.0189  |
| EVM0004305 | LG7 | hypothetical protein CICLE_v1 | not DE   | not DE   | 1.454174 | 0.01838 |
| EVM0010610 | LG7 | hypothetical protein CICLE_v1 | not DE   | not DE   | not DE   | not DE  |
| EVM0010977 | LG7 | hypothetical protein CICLE_v1 | 1.358732 | 0.000348 | not DE   | not DE  |
| EVM0015483 | LG7 | hypothetical protein CICLE_v1 | not DE   | not DE   | not DE   | not DE  |
| EVM0018486 | LG7 | hypothetical protein CICLE_v1 | not DE   | not DE   | not DE   | not DE  |
| EVM0008666 | LG7 | hypothetical protein CICLE_v1 | not DE   | not DE   | not DE   | not DE  |
| EVM0014379 | LG7 | hypothetical protein CICLE_v1 | not DE   | not DE   | not DE   | not DE  |
| EVM0004094 | LG7 | hypothetical protein CICLE_v1 | not DE   | not DE   | not DE   | not DE  |
| EVM0013880 | LG7 | hypothetical protein CICLE_v1 | not DE   | not DE   | not DE   | not DE  |
| EVM0011541 | LG7 | hypothetical protein CICLE_v1 | not DE   | not DE   | not DE   | not DE  |
| EVM0000550 | LG7 | hypothetical protein CICLE_v1 | not DE   | not DE   | not DE   | not DE  |
| EVM0006869 | LG7 | hypothetical protein CICLE_v1 | not DE   | not DE   | not DE   | not DE  |
| EVM0006860 | LG7 | hypothetical protein CICLE_v1 | not DE   | not DE   | not DE   | not DE  |
| EVM0012513 | LG7 | hypothetical protein CICLE_v1 | not DE   | not DE   | not DE   | not DE  |
| EVM0009497 | LG7 | hypothetical protein CICLE_v1 | not DE   | not DE   | not DE   | not DE  |
| EVM0004784 | LG7 | hypothetical protein CICLE_v1 | not DE   | not DE   | not DE   | not DE  |
| EVM0005177 | LG7 | hypothetical protein CICLE_v1 | not DE   | not DE   | not DE   | not DE  |
| EVM0006480 | LG7 | hypothetical protein CICLE_v1 | not DE   | not DE   | not DE   | not DE  |
| EVM0009145 | LG7 | hypothetical protein CICLE_v1 | not DE   | not DE   | not DE   | not DE  |
| EVM0003174 | LG7 | hypothetical protein CICLE_v1 | not DE   | not DE   | not DE   | not DE  |
| EVM0004544 | LG7 | hypothetical protein CICLE_v1 | not DE   | not DE   | not DE   | not DE  |
| EVM0004215 | LG7 | hypothetical protein CICLE_v1 | not DE   | not DE   | not DE   | not DE  |
| EVM0024562 | LG7 | hypothetical protein CICLE_v1 | not DE   | not DE   | not DE   | not DE  |
| EVM0016854 | LG7 | hypothetical protein CICLE_v1 | not DE   | not DE   | -1.32507 | 0.00344 |
| EVM0018395 | LG7 | hypothetical protein CICLE_v1 | not DE   | not DE   | not DE   | not DE  |
| EVM0012190 | LG7 | hypothetical protein CICLE_v1 | not DE   | not DE   | not DE   | not DE  |
| EVM0015853 | LG7 | hypothetical protein CICLE_v1 | not DE   | not DE   | not DE   | not DE  |
| EVM0005772 | LG7 | hypothetical protein CICLE_v1 | not DE   | not DE   | not DE   | not DE  |
| EVM0007175 | LG7 | hypothetical protein CICLE_v1 | not DE   | not DE   | not DE   | not DE  |
| EVM0024204 | LG7 | hypothetical protein CICLE_v1 | not DE   | not DE   | not DE   | not DE  |
| EVM0001761 | LG7 | hypothetical protein CICLE_v1 | not DE   | not DE   | not DE   | not DE  |
| EVM0002589 | LG7 | hypothetical protein CICLE_v1 | not DE   | not DE   | not DE   | not DE  |
| EVM0000360 | LG7 | hypothetical protein CICLE_v1 | -1.12458 | 0.001561 | not DE   | not DE  |
| EVM0005258 | LG7 | hypothetical protein CICLE_v1 | not DE   | not DE   | -1.14858 | 0.00284 |
| EVM0023570 | LG7 | hypothetical protein CICLE_v1 | not DE   | not DE   | not DE   | not DE  |
| EVM0023322 | LG7 | hypothetical protein CICLE_v1 | not DE   | not DE   | not DE   | not DE  |
| EVM0012966 | LG7 | hypothetical protein CICLE_v1 | not DE   | not DE   | not DE   | not DE  |
| EVM0016523 | LG7 | hypothetical protein CICLE_v1 | not DE   | not DE   | not DE   | not DE  |
| EVM0008110 | LG7 | hypothetical protein CICLE_v1 | not DE   | not DE   | not DE   | not DE  |
| EVM0017246 | LG7 | hypothetical protein CICLE_v1 | not DE   | not DE   | not DE   | not DE  |
| EVM0011278 | LG7 | hypothetical protein CICLE_v1 | not DE   | not DE   | not DE   | not DE  |
| EVM0005328 | LG7 | hypothetical protein CICLE_v1 | not DE   | not DE   | not DE   | not DE  |
| EVM0006706 | LG7 | hypothetical protein CICLE_v1 | 1.32936  | 0.012333 | not DE   | not DE  |
| EVM0010846 | LG7 | hypothetical protein CICLE_v1 | not DE   | not DE   | not DE   | not DE  |

|            |     |                               |          |          |          |         |
|------------|-----|-------------------------------|----------|----------|----------|---------|
| EVM0019531 | LG7 | hypothetical protein CICLE_v1 | not DE   | not DE   | not DE   | not DE  |
| EVM0007871 | LG7 | hypothetical protein CICLE_v1 | not DE   | not DE   | not DE   | not DE  |
| EVM0018229 | LG7 | hypothetical protein CICLE_v1 | not DE   | not DE   | not DE   | not DE  |
| EVM0006103 | LG7 | hypothetical protein CICLE_v1 | not DE   | not DE   | not DE   | not DE  |
| EVM0003093 | LG7 | hypothetical protein CICLE_v1 | not DE   | not DE   | not DE   | not DE  |
| EVM0007250 | LG7 | hypothetical protein CICLE_v1 | not DE   | not DE   | not DE   | not DE  |
| EVM0018874 | LG7 | hypothetical protein CICLE_v1 | not DE   | not DE   | not DE   | not DE  |
| EVM0004055 | LG7 | hypothetical protein CICLE_v1 | not DE   | not DE   | not DE   | not DE  |
| EVM0015580 | LG7 | hypothetical protein CICLE_v1 | not DE   | not DE   | not DE   | not DE  |
| EVM0022729 | LG7 | hypothetical protein CICLE_v1 | not DE   | not DE   | not DE   | not DE  |
| EVM0002994 | LG7 | hypothetical protein CICLE_v1 | not DE   | not DE   | not DE   | not DE  |
| EVM0005228 | LG7 | hypothetical protein CICLE_v1 | not DE   | not DE   | not DE   | not DE  |
| EVM0024624 | LG7 | hypothetical protein CICLE_v1 | not DE   | not DE   | not DE   | not DE  |
| EVM0007639 | LG7 | hypothetical protein CICLE_v1 | not DE   | not DE   | not DE   | not DE  |
| EVM0011145 | LG7 | hypothetical protein CICLE_v1 | not DE   | not DE   | not DE   | not DE  |
| EVM0007960 | LG7 | hypothetical protein CICLE_v1 | not DE   | not DE   | not DE   | not DE  |
| EVM0016120 | LG7 | hypothetical protein CICLE_v1 | not DE   | not DE   | not DE   | not DE  |
| EVM0023131 | LG7 | hypothetical protein CICLE_v1 | not DE   | not DE   | not DE   | not DE  |
| EVM0022764 | LG7 | hypothetical protein CICLE_v1 | 1.167516 | 0.004267 | not DE   | not DE  |
| EVM0001020 | LG7 | hypothetical protein CICLE_v1 | not DE   | not DE   | not DE   | not DE  |
| EVM0024467 | LG7 | hypothetical protein CICLE_v1 | not DE   | not DE   | not DE   | not DE  |
| EVM0018686 | LG7 | hypothetical protein CICLE_v1 | not DE   | not DE   | not DE   | not DE  |
| EVM0007698 | LG7 | hypothetical protein CICLE_v1 | not DE   | not DE   | not DE   | not DE  |
| EVM0018557 | LG7 | hypothetical protein CICLE_v1 | not DE   | not DE   | not DE   | not DE  |
| EVM0016096 | LG7 | hypothetical protein CICLE_v1 | not DE   | not DE   | not DE   | not DE  |
| EVM0018944 | LG7 | hypothetical protein CICLE_v1 | not DE   | not DE   | not DE   | not DE  |
| EVM0019435 | LG7 | hypothetical protein CICLE_v1 | not DE   | not DE   | not DE   | not DE  |
| EVM0021112 | LG7 | hypothetical protein CICLE_v1 | not DE   | not DE   | not DE   | not DE  |
| EVM0010805 | LG7 | hypothetical protein CICLE_v1 | not DE   | not DE   | not DE   | not DE  |
| EVM0012729 | LG7 | hypothetical protein CICLE_v1 | not DE   | not DE   | not DE   | not DE  |
| EVM0018648 | LG7 | hypothetical protein CICLE_v1 | not DE   | not DE   | not DE   | not DE  |
| EVM0011437 | LG7 | hypothetical protein CICLE_v1 | not DE   | not DE   | 1.263903 | 0.0191  |
| EVM0018054 | LG7 | hypothetical protein CICLE_v1 | not DE   | not DE   | not DE   | not DE  |
| EVM0001434 | LG7 | hypothetical protein CICLE_v1 | not DE   | not DE   | not DE   | not DE  |
| EVM0004840 | LG7 | hypothetical protein CICLE_v1 | not DE   | not DE   | not DE   | not DE  |
| EVM0023115 | LG7 | hypothetical protein CICLE_v1 | not DE   | not DE   | not DE   | not DE  |
| EVM0005966 | LG7 | hypothetical protein CICLE_v1 | 1.807835 | 0.010271 | not DE   | not DE  |
| EVM0019273 | LG7 | hypothetical protein CICLE_v1 | 1.11348  | 0.035666 | not DE   | not DE  |
| EVM0023392 | LG7 | hypothetical protein CICLE_v1 | not DE   | not DE   | not DE   | not DE  |
| EVM0012438 | LG7 | hypothetical protein CICLE_v1 | -1.87462 | 0.001293 | not DE   | not DE  |
| EVM0007182 | LG7 | hypothetical protein CICLE_v1 | not DE   | not DE   | not DE   | not DE  |
| EVM0024270 | LG7 | hypothetical protein CICLE_v1 | not DE   | not DE   | not DE   | not DE  |
| EVM0016790 | LG7 | hypothetical protein CICLE_v1 | not DE   | not DE   | not DE   | not DE  |
| EVM0024499 | LG7 | hypothetical protein CICLE_v1 | not DE   | not DE   | not DE   | not DE  |
| EVM0018496 | LG7 | hypothetical protein CICLE_v1 | not DE   | not DE   | 1.502574 | 0.00069 |
| EVM0020355 | LG7 | hypothetical protein CICLE_v1 | not DE   | not DE   | not DE   | not DE  |
| EVM0016532 | LG7 | hypothetical protein CICLE_v1 | not DE   | not DE   | not DE   | not DE  |
| EVM0018514 | LG7 | hypothetical protein CICLE_v1 | not DE   | not DE   | not DE   | not DE  |
| EVM0021353 | LG7 | hypothetical protein CICLE_v1 | not DE   | not DE   | 2.721705 | 0.00322 |
| EVM0016031 | LG7 | hypothetical protein CICLE_v1 | not DE   | not DE   | not DE   | not DE  |
| EVM0019293 | LG7 | hypothetical protein CICLE_v1 | not DE   | not DE   | 1.404507 | 0.00291 |
| EVM0002576 | LG7 | hypothetical protein CICLE_v1 | not DE   | not DE   | not DE   | not DE  |
| EVM0019391 | LG7 | hypothetical protein CICLE_v1 | not DE   | not DE   | not DE   | not DE  |
| EVM0002546 | LG7 | hypothetical protein CICLE_v1 | not DE   | not DE   | not DE   | not DE  |

|            |     |                               |          |          |          |         |
|------------|-----|-------------------------------|----------|----------|----------|---------|
| EVM0012584 | LG7 | hypothetical protein CICLE_v1 | not DE   | not DE   | not DE   | not DE  |
| EVM0003314 | LG7 | hypothetical protein CICLE_v1 | not DE   | not DE   | 1.346703 | #####   |
| EVM0004956 | LG7 | hypothetical protein CICLE_v1 | not DE   | not DE   | 1.769271 | 0.0025  |
| EVM0013987 | LG7 | hypothetical protein CICLE_v1 | not DE   | not DE   | not DE   | not DE  |
| EVM0007414 | LG7 | hypothetical protein CICLE_v1 | not DE   | not DE   | not DE   | not DE  |
| EVM0012528 | LG7 | hypothetical protein CICLE_v1 | not DE   | not DE   | not DE   | not DE  |
| EVM0008444 | LG7 | hypothetical protein CICLE_v1 | not DE   | not DE   | not DE   | not DE  |
| EVM0022083 | LG7 | hypothetical protein CICLE_v1 | not DE   | not DE   | not DE   | not DE  |
| EVM0005434 | LG7 | hypothetical protein CICLE_v1 | not DE   | not DE   | not DE   | not DE  |
| EVM0005576 | LG7 | hypothetical protein CICLE_v1 | not DE   | not DE   | not DE   | not DE  |
| EVM0007535 | LG7 | hypothetical protein CICLE_v1 | not DE   | not DE   | not DE   | not DE  |
| EVM0004014 | LG7 | hypothetical protein CICLE_v1 | not DE   | not DE   | not DE   | not DE  |
| EVM0015159 | LG7 | hypothetical protein CICLE_v1 | not DE   | not DE   | not DE   | not DE  |
| EVM0007591 | LG7 | hypothetical protein CICLE_v1 | not DE   | not DE   | not DE   | not DE  |
| EVM0015343 | LG7 | hypothetical protein CICLE_v1 | not DE   | not DE   | not DE   | not DE  |
| EVM0024138 | LG7 | hypothetical protein CICLE_v1 | not DE   | not DE   | not DE   | not DE  |
| EVM0000239 | LG7 | hypothetical protein CICLE_v1 | not DE   | not DE   | not DE   | not DE  |
| EVM0005487 | LG7 | hypothetical protein CICLE_v1 | -3.54865 | 0.000421 | not DE   | not DE  |
| EVM0011085 | LG7 | hypothetical protein CICLE_v1 | 2.018891 | 0.000588 | 1.391894 | #####   |
| EVM0012518 | LG7 | hypothetical protein CICLE_v1 | not DE   | not DE   | not DE   | not DE  |
| EVM0007234 | LG7 | hypothetical protein CICLE_v1 | not DE   | not DE   | not DE   | not DE  |
| EVM0010353 | LG7 | hypothetical protein CICLE_v1 | not DE   | not DE   | not DE   | not DE  |
| EVM0014140 | LG7 | hypothetical protein CICLE_v1 | not DE   | not DE   | not DE   | not DE  |
| EVM0021580 | LG7 | hypothetical protein CICLE_v1 | not DE   | not DE   | not DE   | not DE  |
| EVM0001709 | LG7 | hypothetical protein CICLE_v1 | not DE   | not DE   | not DE   | not DE  |
| EVM0001798 | LG7 | hypothetical protein CICLE_v1 | not DE   | not DE   | not DE   | not DE  |
| EVM0016919 | LG7 | hypothetical protein CICLE_v1 | not DE   | not DE   | not DE   | not DE  |
| EVM0023901 | LG7 | hypothetical protein CICLE_v1 | not DE   | not DE   | not DE   | not DE  |
| EVM0013120 | LG7 | hypothetical protein CICLE_v1 | not DE   | not DE   | not DE   | not DE  |
| EVM0016321 | LG7 | hypothetical protein CICLE_v1 | not DE   | not DE   | not DE   | not DE  |
| EVM0000834 | LG7 | hypothetical protein CICLE_v1 | not DE   | not DE   | not DE   | not DE  |
| EVM0001783 | LG7 | hypothetical protein CICLE_v1 | not DE   | not DE   | not DE   | not DE  |
| EVM0022577 | LG7 | hypothetical protein CICLE_v1 | not DE   | not DE   | not DE   | not DE  |
| EVM0022595 | LG7 | hypothetical protein CICLE_v1 | not DE   | not DE   | not DE   | not DE  |
| EVM0017070 | LG7 | hypothetical protein CICLE_v1 | not DE   | not DE   | not DE   | not DE  |
| EVM0007826 | LG7 | hypothetical protein CICLE_v1 | not DE   | not DE   | not DE   | not DE  |
| EVM0020699 | LG7 | hypothetical protein CISIN_1g | not DE   | not DE   | not DE   | not DE  |
| EVM0021849 | LG7 | hypothetical protein CISIN_1g | 3.092774 | 0.001996 | not DE   | not DE  |
| EVM0023049 | LG7 | hypothetical protein CISIN_1g | not DE   | not DE   | not DE   | not DE  |
| EVM0022158 | LG7 | hypothetical protein CISIN_1g | not DE   | not DE   | not DE   | not DE  |
| EVM0008583 | LG7 | hypothetical protein CISIN_1g | not DE   | not DE   | -1.00368 | 0.04399 |
| EVM0018472 | LG7 | hypothetical protein CISIN_1g | not DE   | not DE   | not DE   | not DE  |
| EVM0013645 | LG7 | hypothetical protein CISIN_1g | not DE   | not DE   | -1.40287 | #####   |
| EVM0005694 | LG7 | hypothetical protein CISIN_1g | not DE   | not DE   | not DE   | not DE  |
| EVM0012734 | LG7 | hypothetical protein CISIN_1g | not DE   | not DE   | not DE   | not DE  |
| EVM0017577 | LG7 | hypothetical protein CISIN_1g | not DE   | not DE   | not DE   | not DE  |
| EVM0003279 | LG7 | hypothetical protein CISIN_1g | not DE   | not DE   | not DE   | not DE  |
| EVM0010028 | LG7 | hypothetical protein CISIN_1g | not DE   | not DE   | not DE   | not DE  |
| EVM0021269 | LG7 | hypothetical protein CISIN_1g | not DE   | not DE   | not DE   | not DE  |
| EVM0021780 | LG7 | hypothetical protein CISIN_1g | not DE   | not DE   | not DE   | not DE  |
| EVM0017852 | LG7 | hypothetical protein CISIN_1g | not DE   | not DE   | not DE   | not DE  |
| EVM0016497 | LG7 | hypothetical protein CISIN_1g | not DE   | not DE   | not DE   | not DE  |
| EVM0001542 | LG7 | hypothetical protein CISIN_1g | not DE   | not DE   | not DE   | not DE  |
| EVM0000765 | LG7 | hypothetical protein CISIN_1g | 1.902262 | 0.000272 | not DE   | not DE  |

|            |     |                               |          |          |          |         |
|------------|-----|-------------------------------|----------|----------|----------|---------|
| EVM0007483 | LG7 | hypothetical protein CISIN_1g | not DE   | not DE   | not DE   | not DE  |
| EVM0007738 | LG7 | hypothetical protein CISIN_1g | not DE   | not DE   | not DE   | not DE  |
| EVM0023407 | LG7 | hypothetical protein CISIN_1g | not DE   | not DE   | not DE   | not DE  |
| EVM0003018 | LG7 | hypothetical protein CISIN_1g | not DE   | not DE   | not DE   | not DE  |
| EVM0006944 | LG7 | hypothetical protein CISIN_1g | not DE   | not DE   | not DE   | not DE  |
| EVM0004088 | LG7 | hypothetical protein CISIN_1g | not DE   | not DE   | not DE   | not DE  |
| EVM0004950 | LG7 | hypothetical protein CISIN_1g | not DE   | not DE   | not DE   | not DE  |
| EVM0005729 | LG7 | hypothetical protein CISIN_1g | not DE   | not DE   | not DE   | not DE  |
| EVM0016701 | LG7 | hypothetical protein CISIN_1g | not DE   | not DE   | not DE   | not DE  |
| EVM0021543 | LG7 | hypothetical protein CISIN_1g | not DE   | not DE   | not DE   | not DE  |
| EVM0010210 | LG7 | hypothetical protein CISIN_1g | not DE   | not DE   | not DE   | not DE  |
| EVM0017641 | LG7 | hypothetical protein CISIN_1g | not DE   | not DE   | not DE   | not DE  |
| EVM0001429 | LG7 | hypothetical protein CISIN_1g | not DE   | not DE   | not DE   | not DE  |
| EVM0002910 | LG7 | hypothetical protein CISIN_1g | not DE   | not DE   | not DE   | not DE  |
| EVM0023379 | LG7 | hypothetical protein CISIN_1g | not DE   | not DE   | not DE   | not DE  |
| EVM0023230 | LG7 | hypothetical protein CISIN_1g | not DE   | not DE   | not DE   | not DE  |
| EVM0003968 | LG7 | hypothetical protein CISIN_1g | not DE   | not DE   | not DE   | not DE  |
| EVM0002564 | LG7 | hypothetical protein CISIN_1g | not DE   | not DE   | not DE   | not DE  |
| EVM0003853 | LG7 | hypothetical protein CISIN_1g | not DE   | not DE   | not DE   | not DE  |
| EVM0004497 | LG7 | hypothetical protein CISIN_1g | not DE   | not DE   | not DE   | not DE  |
| EVM0011947 | LG7 | hypothetical protein CISIN_1g | not DE   | not DE   | not DE   | not DE  |
| EVM0001127 | LG7 | hypothetical protein CISIN_1g | not DE   | not DE   | not DE   | not DE  |
| EVM0018833 | LG7 | hypothetical protein CISIN_1g | not DE   | not DE   | not DE   | not DE  |
| EVM0008585 | LG7 | hypothetical protein CISIN_1g | 2.507122 | 9.90E-08 | not DE   | not DE  |
| EVM0005149 | LG7 | hypothetical protein CISIN_1g | not DE   | not DE   | not DE   | not DE  |
| EVM0015891 | LG7 | hypothetical protein CISIN_1g | not DE   | not DE   | not DE   | not DE  |
| EVM0001234 | LG7 | hypothetical protein CISIN_1g | not DE   | not DE   | not DE   | not DE  |
| EVM0005332 | LG7 | hypothetical protein CISIN_1g | not DE   | not DE   | not DE   | not DE  |
| EVM0002164 | LG7 | hypothetical protein CISIN_1g | not DE   | not DE   | not DE   | not DE  |
| EVM0003186 | LG7 | hypothetical protein CISIN_1g | not DE   | not DE   | not DE   | not DE  |
| EVM0007020 | LG7 | hypothetical protein CISIN_1g | not DE   | not DE   | not DE   | not DE  |
| EVM0008013 | LG7 | hypothetical protein CISIN_1g | not DE   | not DE   | not DE   | not DE  |
| EVM0003185 | LG7 | hypothetical protein CISIN_1g | not DE   | not DE   | not DE   | not DE  |
| EVM0009913 | LG7 | hypothetical protein CISIN_1g | not DE   | not DE   | not DE   | not DE  |
| EVM0005489 | LG7 | hypothetical protein CISIN_1g | not DE   | not DE   | not DE   | not DE  |
| EVM0006097 | LG7 | hypothetical protein CISIN_1g | not DE   | not DE   | not DE   | not DE  |
| EVM0011594 | LG7 | hypothetical protein CISIN_1g | not DE   | not DE   | not DE   | not DE  |
| EVM0014447 | LG7 | hypothetical protein CISIN_1g | not DE   | not DE   | not DE   | not DE  |
| EVM0002169 | LG7 | hypothetical protein CISIN_1g | not DE   | not DE   | not DE   | not DE  |
| EVM0003982 | LG7 | hypothetical protein CISIN_1g | not DE   | not DE   | not DE   | not DE  |
| EVM0004553 | LG7 | hypothetical protein CISIN_1g | not DE   | not DE   | 1.241092 | #####   |
| EVM0020153 | LG7 | hypothetical protein CISIN_1g | not DE   | not DE   | not DE   | not DE  |
| EVM0020648 | LG7 | hypothetical protein CISIN_1g | not DE   | not DE   | not DE   | not DE  |
| EVM0010184 | LG7 | hypothetical protein CISIN_1g | not DE   | not DE   | not DE   | not DE  |
| EVM0012084 | LG7 | hypothetical protein CISIN_1g | not DE   | not DE   | not DE   | not DE  |
| EVM0001222 | LG7 | hypothetical protein CISIN_1g | not DE   | not DE   | not DE   | not DE  |
| EVM0006260 | LG7 | hypothetical protein CISIN_1g | not DE   | not DE   | not DE   | not DE  |
| EVM0012536 | LG7 | hypothetical protein CISIN_1g | not DE   | not DE   | not DE   | not DE  |
| EVM0021476 | LG7 | hypothetical protein CISIN_1g | not DE   | not DE   | not DE   | not DE  |
| EVM0021431 | LG7 | hypothetical protein CISIN_1g | not DE   | not DE   | not DE   | not DE  |
| EVM0018384 | LG7 | hypothetical protein CISIN_1g | not DE   | not DE   | not DE   | not DE  |
| EVM0022005 | LG7 | hypothetical protein CISIN_1g | not DE   | not DE   | not DE   | not DE  |
| EVM0009839 | LG7 | hypothetical protein CISIN_1g | not DE   | not DE   | 1.309704 | 0.00022 |
| EVM0022911 | LG7 | hypothetical protein CISIN_1g | not DE   | not DE   | -1.70486 | 0.0228  |

|            |     |                               |          |          |          |        |
|------------|-----|-------------------------------|----------|----------|----------|--------|
| EVM0002327 | LG7 | hypothetical protein CISIN_1g | not DE   | not DE   | not DE   | not DE |
| EVM0004123 | LG7 | hypothetical protein CISIN_1g | not DE   | not DE   | not DE   | not DE |
| EVM0016903 | LG7 | hypothetical protein CISIN_1g | not DE   | not DE   | not DE   | not DE |
| EVM0003098 | LG7 | hypothetical protein CISIN_1g | not DE   | not DE   | not DE   | not DE |
| EVM0010145 | LG7 | hypothetical protein CISIN_1g | not DE   | not DE   | not DE   | not DE |
| EVM0010285 | LG7 | hypothetical protein CISIN_1g | not DE   | not DE   | not DE   | not DE |
| EVM0010941 | LG7 | hypothetical protein CISIN_1g | not DE   | not DE   | not DE   | not DE |
| EVM0001796 | LG7 | hypothetical protein CISIN_1g | not DE   | not DE   | not DE   | not DE |
| EVM0007102 | LG7 | hypothetical protein CISIN_1g | not DE   | not DE   | not DE   | not DE |
| EVM0010834 | LG7 | hypothetical protein CISIN_1g | not DE   | not DE   | not DE   | not DE |
| EVM0014362 | LG7 | hypothetical protein CISIN_1g | not DE   | not DE   | not DE   | not DE |
| EVM0016148 | LG7 | hypothetical protein CISIN_1g | not DE   | not DE   | not DE   | not DE |
| EVM0020158 | LG7 | hypothetical protein CISIN_1g | not DE   | not DE   | not DE   | not DE |
| EVM0024175 | LG7 | hypothetical protein CISIN_1g | not DE   | not DE   | not DE   | not DE |
| EVM0013682 | LG7 | hypothetical protein CISIN_1g | not DE   | not DE   | not DE   | not DE |
| EVM0007957 | LG7 | hypothetical protein CISIN_1g | not DE   | not DE   | not DE   | not DE |
| EVM0004858 | LG7 | hypothetical protein CISIN_1g | not DE   | not DE   | not DE   | not DE |
| EVM0016060 | LG7 | hypothetical protein CISIN_1g | not DE   | not DE   | not DE   | not DE |
| EVM0018582 | LG7 | hypothetical protein CISIN_1g | not DE   | not DE   | not DE   | not DE |
| EVM0010697 | LG7 | hypothetical protein CISIN_1g | not DE   | not DE   | not DE   | not DE |
| EVM0009137 | LG7 | hypothetical protein CISIN_1g | not DE   | not DE   | not DE   | not DE |
| EVM0017436 | LG7 | hypothetical protein CISIN_1g | not DE   | not DE   | not DE   | not DE |
| EVM0000882 | LG7 | hypothetical protein CISIN_1g | not DE   | not DE   | not DE   | not DE |
| EVM0019392 | LG7 | hypothetical protein CISIN_1g | not DE   | not DE   | not DE   | not DE |
| EVM0014393 | LG7 | hypothetical protein CISIN_1g | not DE   | not DE   | not DE   | not DE |
| EVM0003686 | LG7 | hypothetical protein CISIN_1g | not DE   | not DE   | not DE   | not DE |
| EVM0009535 | LG7 | hypothetical protein CISIN_1g | not DE   | not DE   | not DE   | not DE |
| EVM0021126 | LG7 | hypothetical protein CISIN_1g | not DE   | not DE   | not DE   | not DE |
| EVM0001721 | LG7 | hypothetical protein CISIN_1g | not DE   | not DE   | not DE   | not DE |
| EVM0014671 | LG7 | hypothetical protein CISIN_1g | not DE   | not DE   | not DE   | not DE |
| EVM0019134 | LG7 | hypothetical protein CISIN_1g | not DE   | not DE   | not DE   | not DE |
| EVM0006377 | LG7 | hypothetical protein CISIN_1g | not DE   | not DE   | not DE   | not DE |
| EVM0010791 | LG7 | hypothetical protein CISIN_1g | not DE   | not DE   | not DE   | not DE |
| EVM0003087 | LG7 | hypothetical protein CISIN_1g | not DE   | not DE   | not DE   | not DE |
| EVM0024542 | LG7 | hypothetical protein CISIN_1g | -2.18307 | 0.007087 | not DE   | not DE |
| EVM0002754 | LG7 | hypothetical protein CISIN_1g | not DE   | not DE   | not DE   | not DE |
| EVM0000889 | LG7 | hypothetical protein CISIN_1g | not DE   | not DE   | not DE   | not DE |
| EVM0020823 | LG7 | hypothetical protein CISIN_1g | not DE   | not DE   | not DE   | not DE |
| EVM0021340 | LG7 | hypothetical protein CISIN_1g | not DE   | not DE   | not DE   | not DE |
| EVM0001060 | LG7 | hypothetical protein CISIN_1g | not DE   | not DE   | not DE   | not DE |
| EVM0017899 | LG7 | hypothetical protein CISIN_1g | not DE   | not DE   | not DE   | not DE |
| EVM0019023 | LG7 | hypothetical protein CISIN_1g | 6.26885  | 0.024193 | not DE   | not DE |
| EVM0022720 | LG7 | hypothetical protein CISIN_1g | not DE   | not DE   | not DE   | not DE |
| EVM0023882 | LG7 | hypothetical protein CISIN_1g | not DE   | not DE   | not DE   | not DE |
| EVM0019914 | LG7 | hypothetical protein CISIN_1g | not DE   | not DE   | not DE   | not DE |
| EVM0013509 | LG7 | hypothetical protein CISIN_1g | not DE   | not DE   | not DE   | not DE |
| EVM0015279 | LG7 | hypothetical protein CISIN_1g | not DE   | not DE   | not DE   | not DE |
| EVM0015298 | LG7 | hypothetical protein CISIN_1g | not DE   | not DE   | not DE   | not DE |
| EVM0004481 | LG7 | hypothetical protein CISIN_1g | not DE   | not DE   | not DE   | not DE |
| EVM0008916 | LG7 | hypothetical protein CISIN_1g | not DE   | not DE   | not DE   | not DE |
| EVM0015088 | LG7 | hypothetical protein CISIN_1g | not DE   | not DE   | not DE   | not DE |
| EVM0022901 | LG7 | hypothetical protein Csa_7G43 | not DE   | not DE   | not DE   | not DE |
| EVM0003830 | LG7 | hypothetical protein F383_081 | -1.30952 | 0.007976 | 1.547579 | #####  |
| EVM0021995 | LG7 | hypothetical protein JCGZ_018 | not DE   | not DE   | -1.32814 | #####  |

|            |     |                               |        |          |          |         |
|------------|-----|-------------------------------|--------|----------|----------|---------|
| EVM0001468 | LG7 | hypothetical protein JCGZ_018 | not DE | not DE   | not DE   | not DE  |
| EVM0007013 | LG7 | hypothetical protein JCGZ_018 | not DE | not DE   | not DE   | not DE  |
| EVM0007490 | LG7 | hypothetical protein JCGZ_018 | not DE | not DE   | not DE   | not DE  |
| EVM0009022 | LG7 | hypothetical protein JCGZ_018 | not DE | not DE   | not DE   | not DE  |
| EVM0023571 | LG7 | hypothetical protein JCGZ_018 | not DE | not DE   | not DE   | not DE  |
| EVM0024176 | LG7 | hypothetical protein JCGZ_041 | not DE | not DE   | not DE   | not DE  |
| EVM0009162 | LG7 | hypothetical protein JCGZ_041 | not DE | not DE   | not DE   | not DE  |
| EVM0021346 | LG7 | hypothetical protein JCGZ_055 | not DE | not DE   | not DE   | not DE  |
| EVM0009436 | LG7 | hypothetical protein JCGZ_055 | not DE | not DE   | not DE   | not DE  |
| EVM0002263 | LG7 | hypothetical protein JCGZ_056 | not DE | not DE   | not DE   | not DE  |
| EVM0004152 | LG7 | hypothetical protein JCGZ_056 | not DE | not DE   | not DE   | not DE  |
| EVM0006534 | LG7 | hypothetical protein JCGZ_056 | not DE | not DE   | not DE   | not DE  |
| EVM0012662 | LG7 | hypothetical protein JCGZ_066 | not DE | not DE   | not DE   | not DE  |
| EVM0021295 | LG7 | hypothetical protein JCGZ_108 | not DE | not DE   | not DE   | not DE  |
| EVM0007467 | LG7 | hypothetical protein JCGZ_109 | not DE | not DE   | not DE   | not DE  |
| EVM0010621 | LG7 | hypothetical protein JCGZ_111 | not DE | not DE   | not DE   | not DE  |
| EVM0020070 | LG7 | hypothetical protein JCGZ_112 | not DE | not DE   | not DE   | not DE  |
| EVM0009101 | LG7 | hypothetical protein JCGZ_117 | not DE | not DE   | not DE   | not DE  |
| EVM0021811 | LG7 | hypothetical protein JCGZ_127 | not DE | not DE   | 1.624293 | 0.01152 |
| EVM0013200 | LG7 | hypothetical protein JCGZ_135 | not DE | not DE   | not DE   | not DE  |
| EVM0012038 | LG7 | hypothetical protein JCGZ_203 | not DE | not DE   | not DE   | not DE  |
| EVM0011533 | LG7 | hypothetical protein JCGZ_203 | not DE | not DE   | not DE   | not DE  |
| EVM0017794 | LG7 | hypothetical protein JCGZ_203 | not DE | not DE   | not DE   | not DE  |
| EVM0013161 | LG7 | hypothetical protein JCGZ_203 | not DE | not DE   | not DE   | not DE  |
| EVM0003452 | LG7 | hypothetical protein JCGZ_226 | not DE | not DE   | not DE   | not DE  |
| EVM0016534 | LG7 | hypothetical protein JCGZ_226 | not DE | not DE   | not DE   | not DE  |
| EVM0000246 | LG7 | hypothetical protein JCGZ_227 | not DE | not DE   | not DE   | not DE  |
| EVM0004683 | LG7 | hypothetical protein JCGZ_227 | not DE | not DE   | not DE   | not DE  |
| EVM0015300 | LG7 | hypothetical protein JCGZ_227 | not DE | not DE   | not DE   | not DE  |
| EVM0008404 | LG7 | hypothetical protein JCGZ_238 | not DE | not DE   | -5.93706 | #####   |
| EVM0023216 | LG7 | hypothetical protein JCGZ_238 | not DE | not DE   | not DE   | not DE  |
| EVM0017941 | LG7 | hypothetical protein JCGZ_238 | not DE | not DE   | not DE   | not DE  |
| EVM0012368 | LG7 | hypothetical protein JCGZ_248 | not DE | not DE   | not DE   | not DE  |
| EVM0014624 | LG7 | hypothetical protein JCGZ_259 | not DE | not DE   | not DE   | not DE  |
| EVM0020578 | LG7 | hypothetical protein JCGZ_259 | not DE | not DE   | not DE   | not DE  |
| EVM0017300 | LG7 | hypothetical protein JCGZ_267 | not DE | not DE   | not DE   | not DE  |
| EVM0003684 | LG7 | hypothetical protein L484_000 | not DE | not DE   | 1.995296 | #####   |
| EVM0000524 | LG7 | hypothetical protein L484_001 | not DE | not DE   | not DE   | not DE  |
| EVM0002369 | LG7 | hypothetical protein L484_002 | not DE | not DE   | -1.11457 | 0.00504 |
| EVM0006665 | LG7 | hypothetical protein L484_016 | not DE | not DE   | not DE   | not DE  |
| EVM0010769 | LG7 | hypothetical protein L484_019 | not DE | not DE   | not DE   | not DE  |
| EVM0000788 | LG7 | hypothetical protein MIMGU_mg | not DE | not DE   | not DE   | not DE  |
| EVM0009717 | LG7 | hypothetical protein MIMGU_mg | not DE | not DE   | not DE   | not DE  |
| EVM0001734 | LG7 | hypothetical protein PHAVU_00 | not DE | not DE   | -1.39134 | 0.00412 |
| EVM0010121 | LG7 | hypothetical protein PHAVU_00 | not DE | not DE   | not DE   | not DE  |
| EVM0013110 | LG7 | hypothetical protein PHAVU_00 | not DE | not DE   | not DE   | not DE  |
| EVM0020087 | LG7 | hypothetical protein PHAVU_01 | not DE | not DE   | not DE   | not DE  |
| EVM0011205 | LG7 | hypothetical protein PHAVU_01 | not DE | not DE   | 1.14855  | 0.03212 |
| EVM0008853 | LG7 | hypothetical protein POPTR_00 | not DE | not DE   | not DE   | not DE  |
| EVM0017080 | LG7 | hypothetical protein POPTR_00 | not DE | not DE   | not DE   | not DE  |
| EVM0005292 | LG7 | hypothetical protein POPTR_00 | -1.03  | 0.048541 | not DE   | not DE  |
| EVM0018843 | LG7 | hypothetical protein POPTR_00 | not DE | not DE   | not DE   | not DE  |
| EVM0017538 | LG7 | hypothetical protein POPTR_00 | not DE | not DE   | not DE   | not DE  |
| EVM0015035 | LG7 | hypothetical protein POPTR_00 | not DE | not DE   | not DE   | not DE  |



|            |     |                               |          |          |          |         |
|------------|-----|-------------------------------|----------|----------|----------|---------|
| EVM0021710 | LG7 | hypothetical protein POPTR_00 | not DE   | not DE   | not DE   | not DE  |
| EVM0016739 | LG7 | hypothetical protein POPTR_00 | not DE   | not DE   | not DE   | not DE  |
| EVM0020500 | LG7 | hypothetical protein POPTR_00 | not DE   | not DE   | not DE   | not DE  |
| EVM0004221 | LG7 | hypothetical protein POPTR_00 | not DE   | not DE   | not DE   | not DE  |
| EVM0014480 | LG7 | hypothetical protein POPTR_00 | not DE   | not DE   | not DE   | not DE  |
| EVM0010518 | LG7 | hypothetical protein POPTR_00 | not DE   | not DE   | not DE   | not DE  |
| EVM0020303 | LG7 | hypothetical protein POPTR_00 | not DE   | not DE   | not DE   | not DE  |
| EVM0005713 | LG7 | hypothetical protein POPTR_00 | not DE   | not DE   | not DE   | not DE  |
| EVM0019443 | LG7 | hypothetical protein POPTR_00 | not DE   | not DE   | not DE   | not DE  |
| EVM0019537 | LG7 | hypothetical protein POPTR_00 | not DE   | not DE   | not DE   | not DE  |
| EVM0019259 | LG7 | hypothetical protein POPTR_04 | not DE   | not DE   | not DE   | not DE  |
| EVM0024236 | LG7 | hypothetical protein PRUPE_pp | not DE   | not DE   | not DE   | not DE  |
| EVM0022056 | LG7 | hypothetical protein PRUPE_pp | not DE   | not DE   | not DE   | not DE  |
| EVM0010982 | LG7 | hypothetical protein PRUPE_pp | not DE   | not DE   | not DE   | not DE  |
| EVM0013264 | LG7 | hypothetical protein PRUPE_pp | not DE   | not DE   | not DE   | not DE  |
| EVM0010199 | LG7 | hypothetical protein PRUPE_pp | not DE   | not DE   | not DE   | not DE  |
| EVM0000387 | LG7 | hypothetical protein PRUPE_pp | not DE   | not DE   | not DE   | not DE  |
| EVM0006119 | LG7 | hypothetical protein PRUPE_pp | not DE   | not DE   | not DE   | not DE  |
| EVM0012489 | LG7 | hypothetical protein PRUPE_pp | not DE   | not DE   | not DE   | not DE  |
| EVM0013175 | LG7 | hypothetical protein PRUPE_pp | not DE   | not DE   | not DE   | not DE  |
| EVM0022262 | LG7 | hypothetical protein PRUPE_pp | not DE   | not DE   | not DE   | not DE  |
| EVM0007088 | LG7 | hypothetical protein PRUPE_pp | not DE   | not DE   | not DE   | not DE  |
| EVM0011896 | LG7 | hypothetical protein PRUPE_pp | not DE   | not DE   | not DE   | not DE  |
| EVM0019633 | LG7 | hypothetical protein PRUPE_pp | not DE   | not DE   | not DE   | not DE  |
| EVM0003805 | LG7 | hypothetical protein RCOM_014 | not DE   | not DE   | not DE   | not DE  |
| EVM0015044 | LG7 | hypothetical protein RCOM_014 | not DE   | not DE   | not DE   | not DE  |
| EVM0012815 | LG7 | hypothetical protein SELMODRA | not DE   | not DE   | not DE   | not DE  |
| EVM0013543 | LG7 | hypothetical protein SELMODRA | not DE   | not DE   | not DE   | not DE  |
| EVM0019525 | LG7 | hypothetical protein SELMODRA | not DE   | not DE   | not DE   | not DE  |
| EVM0021309 | LG7 | hypothetical protein SORBIDRA | not DE   | not DE   | not DE   | not DE  |
| EVM0008680 | LG7 | hypothetical protein VITISV_0 | not DE   | not DE   | not DE   | not DE  |
| EVM0001160 | LG7 | hypothetical protein VITISV_0 | not DE   | not DE   | not DE   | not DE  |
| EVM0010558 | LG7 | hypothetical protein VITISV_0 | not DE   | not DE   | not DE   | not DE  |
| EVM0021108 | LG7 | hypothetical protein VITISV_0 | not DE   | not DE   | not DE   | not DE  |
| EVM0001453 | LG7 | hypothetical protein ZEAMMB73 | not DE   | not DE   | not DE   | not DE  |
| EVM0011000 | LG7 | hypothetical protein ZEAMMB73 | -1.67592 | 0.000136 | not DE   | not DE  |
| EVM0011623 | LG7 | hypothetical protein ZEAMMB73 | not DE   | not DE   | 1.536298 | #####   |
| EVM0018691 | LG7 | integrase                     | not DE   | not DE   | not DE   | not DE  |
| EVM0008502 | LG7 | kinesin, putative             | not DE   | not DE   | not DE   | not DE  |
| EVM0022490 | LG7 | microsomal oleate desaturase  | not DE   | not DE   | not DE   | not DE  |
| EVM0016785 | LG7 | mitogen-activated protein kin | not DE   | not DE   | not DE   | not DE  |
| EVM0002801 | LG7 | nutrient reservoir, putative  | not DE   | not DE   | not DE   | not DE  |
| EVM0005885 | LG7 | oxidoreductase family protein | not DE   | not DE   | not DE   | not DE  |
| EVM0007488 | LG7 | oxidoreductase family protein | not DE   | not DE   | not DE   | not DE  |
| EVM0012281 | LG7 | oxidoreductase family protein | not DE   | not DE   | not DE   | not DE  |
| EVM0020970 | LG7 | oxidoreductase family protein | not DE   | not DE   | not DE   | not DE  |
| EVM0019840 | LG7 | peroxidase 2                  | not DE   | not DE   | not DE   | not DE  |
| EVM0014453 | LG7 | photosystem II protein M      | not DE   | not DE   | not DE   | not DE  |
| EVM0006512 | LG7 | putative carboxylesterase 15  | not DE   | not DE   | not DE   | not DE  |
| EVM0000352 | LG7 | putative cysteine proteinase  | not DE   | not DE   | 3.389118 | 0.00787 |
| EVM0021079 | LG7 | putative cysteine proteinase  | not DE   | not DE   | not DE   | not DE  |
| EVM0014811 | LG7 | putative retroelement pol pol | not DE   | not DE   | not DE   | not DE  |
| EVM0004533 | LG7 | pyruvate kinase, putative     | not DE   | not DE   | not DE   | not DE  |
| EVM0015173 | LG7 | pyruvate kinase, putative     | not DE   | not DE   | not DE   | not DE  |

|            |     |                                                                         |          |          |          |         |
|------------|-----|-------------------------------------------------------------------------|----------|----------|----------|---------|
| EVM0014144 | LG7 | ribosomal protein L20                                                   | not DE   | not DE   | not DE   | not DE  |
| EVM0024583 | LG7 | rpoC-like ORF 151                                                       | not DE   | not DE   | not DE   | not DE  |
| EVM0000476 | LG7 | serine-threonine protein kinase                                         | not DE   | not DE   | not DE   | not DE  |
| EVM0005923 | LG7 | sialyltransferase, putative                                             | -1.22153 | 0.002997 | not DE   | not DE  |
| EVM0003201 | LG7 | signal peptide peptidase family                                         | not DE   | not DE   | not DE   | not DE  |
| EVM0017724 | LG7 | terminal flower 1 protein                                               | not DE   | not DE   | not DE   | not DE  |
| EVM0000100 | LG7 | transcription factor, putative                                          | not DE   | not DE   | not DE   | not DE  |
| EVM0019110 | LG7 | translation initiation factor                                           | not DE   | not DE   | not DE   | not DE  |
| EVM0008412 | LG7 | type 2A protein phosphatase-3                                           | not DE   | not DE   | not DE   | not DE  |
| EVM0017635 | LG7 | ubiquitin-protein ligase, putative                                      | not DE   | not DE   | not DE   | not DE  |
| EVM0018711 | LG7 | ubiquitin-protein ligase, putative                                      | not DE   | not DE   | not DE   | not DE  |
| EVM0023617 | LG7 | uncharacterized protein LOC10                                           | not DE   | not DE   | not DE   | not DE  |
| EVM0000205 | LG7 | unknown protein                                                         | not DE   | not DE   | not DE   | not DE  |
| EVM0001617 | LG7 | unknown protein                                                         | not DE   | not DE   | not DE   | not DE  |
| EVM0002054 | LG7 | unknown protein                                                         | not DE   | not DE   | not DE   | not DE  |
| EVM0002175 | LG7 | unknown protein                                                         | not DE   | not DE   | not DE   | not DE  |
| EVM0003123 | LG7 | unknown protein                                                         | not DE   | not DE   | not DE   | not DE  |
| EVM0004151 | LG7 | unknown protein                                                         | not DE   | not DE   | not DE   | not DE  |
| EVM0006311 | LG7 | unknown protein                                                         | not DE   | not DE   | not DE   | not DE  |
| EVM0006427 | LG7 | unknown protein                                                         | not DE   | not DE   | not DE   | not DE  |
| EVM0006994 | LG7 | unknown protein                                                         | not DE   | not DE   | not DE   | not DE  |
| EVM0009163 | LG7 | unknown protein                                                         | not DE   | not DE   | not DE   | not DE  |
| EVM0010520 | LG7 | unknown protein                                                         | not DE   | not DE   | not DE   | not DE  |
| EVM0011454 | LG7 | unknown protein                                                         | not DE   | not DE   | not DE   | not DE  |
| EVM0011522 | LG7 | unknown protein                                                         | not DE   | not DE   | not DE   | not DE  |
| EVM0011644 | LG7 | unknown protein                                                         | not DE   | not DE   | not DE   | not DE  |
| EVM0013994 | LG7 | unknown protein                                                         | not DE   | not DE   | not DE   | not DE  |
| EVM0015863 | LG7 | unknown protein                                                         | not DE   | not DE   | not DE   | not DE  |
| EVM0018154 | LG7 | unknown protein                                                         | not DE   | not DE   | not DE   | not DE  |
| EVM0018720 | LG7 | unknown protein                                                         | not DE   | not DE   | not DE   | not DE  |
| EVM0018941 | LG7 | unknown protein                                                         | not DE   | not DE   | not DE   | not DE  |
| EVM0019646 | LG7 | unknown protein                                                         | not DE   | not DE   | not DE   | not DE  |
| EVM0019899 | LG7 | unknown protein                                                         | not DE   | not DE   | not DE   | not DE  |
| EVM0021463 | LG7 | unknown protein                                                         | not DE   | not DE   | not DE   | not DE  |
| EVM0022146 | LG7 | unknown protein                                                         | not DE   | not DE   | not DE   | not DE  |
| EVM0024429 | LG7 | unknown protein                                                         | not DE   | not DE   | not DE   | not DE  |
| EVM0000522 | LG7 | unnamed protein product                                                 | not DE   | not DE   | not DE   | not DE  |
| EVM0001018 | LG7 | unnamed protein product                                                 | not DE   | not DE   | not DE   | not DE  |
| EVM0004928 | LG7 | unnamed protein product                                                 | not DE   | not DE   | not DE   | not DE  |
| EVM0005516 | LG7 | unnamed protein product                                                 | not DE   | not DE   | not DE   | not DE  |
| EVM0008359 | LG7 | unnamed protein product                                                 | not DE   | not DE   | 2.135014 | 0.03466 |
| EVM0009174 | LG7 | unnamed protein product                                                 | not DE   | not DE   | not DE   | not DE  |
| EVM0014705 | LG7 | unnamed protein product                                                 | not DE   | not DE   | not DE   | not DE  |
| EVM0015919 | LG7 | unnamed protein product                                                 | not DE   | not DE   | 1.223558 | 0.04801 |
| EVM0016142 | LG7 | unnamed protein product                                                 | not DE   | not DE   | 2.611017 | 0.00144 |
| EVM0019913 | LG7 | unnamed protein product                                                 | not DE   | not DE   | not DE   | not DE  |
| EVM0021596 | LG7 | unnamed protein product                                                 | not DE   | not DE   | not DE   | not DE  |
| EVM0022114 | LG7 | unnamed protein product                                                 | not DE   | not DE   | not DE   | not DE  |
| EVM0023090 | LG7 | unnamed protein product                                                 | not DE   | not DE   | not DE   | not DE  |
| EVM0007979 | LG7 | xyloglucan endotransglycosylase                                         | not DE   | not DE   | not DE   | not DE  |
| EVM0006424 | LG7 | zinc finger protein, putative                                           | not DE   | not DE   | not DE   | not DE  |
| EVM0017916 | LG8 | 1-(5-phosphoribosyl)-5-[(5-phosphoribosyl)amino]imidazole-4-carboxamide | not DE   | not DE   | not DE   | not DE  |
| EVM0004427 | LG8 | 10 kDa chaperonin                                                       | -2.23825 | 5.34E-13 | -1.41631 | #####   |
| EVM0010122 | LG8 | 21 kDa protein-like                                                     | -2.326   | 0.021214 | not DE   | not DE  |

|            |     |                                 |          |          |          |         |
|------------|-----|---------------------------------|----------|----------|----------|---------|
| EVM0015363 | LG8 | 26S protease regulatory subunit | not DE   | not DE   | not DE   | not DE  |
| EVM0012525 | LG8 | 4-hydroxybenzoate polyprenyl    | 1.462553 | 0.003969 | not DE   | not DE  |
| EVM0000321 | LG8 | 40S ribosomal protein S9-2      | not DE   | not DE   | not DE   | not DE  |
| EVM0005082 | LG8 | 5-formyltetrahydrofolate cyc    | -1.14062 | 0.004427 | not DE   | not DE  |
| EVM0008829 | LG8 | 50S ribosomal protein L1, ch    | not DE   | not DE   | not DE   | not DE  |
| EVM0016394 | LG8 | 50S ribosomal protein L15, c    | not DE   | not DE   | not DE   | not DE  |
| EVM0021207 | LG8 | 60S ribosomal protein L31       | not DE   | not DE   | not DE   | not DE  |
| EVM0023943 | LG8 | 60S ribosomal protein L6-like   | not DE   | not DE   | not DE   | not DE  |
| EVM0009878 | LG8 | 65-kDa microtubule-associate    | not DE   | not DE   | not DE   | not DE  |
| EVM0006908 | LG8 | 65-kDa microtubule-associate    | not DE   | not DE   | not DE   | not DE  |
| EVM0023062 | LG8 | 66 kDa stress protein-like i    | not DE   | not DE   | not DE   | not DE  |
| EVM0008443 | LG8 | ABC transporter F family mem    | not DE   | not DE   | not DE   | not DE  |
| EVM0008109 | LG8 | ADP-ribosylation factor         | not DE   | not DE   | not DE   | not DE  |
| EVM0001559 | LG8 | ALBINO3-like protein 1, chl     | not DE   | not DE   | not DE   | not DE  |
| EVM0001672 | LG8 | AP2/ERF and B3 domain-contain   | not DE   | not DE   | not DE   | not DE  |
| EVM0019063 | LG8 | ARM REPEAT PROTEIN INTERACTI    | not DE   | not DE   | not DE   | not DE  |
| EVM0014981 | LG8 | ATP synthase subunit 0, mito    | not DE   | not DE   | not DE   | not DE  |
| EVM0009229 | LG8 | BTB/POZ domain-containing pr    | not DE   | not DE   | not DE   | not DE  |
| EVM0000902 | LG8 | CLAVATA3/ESR (CLE)-related p    | not DE   | not DE   | not DE   | not DE  |
| EVM0007671 | LG8 | CSC1-like protein At3g54510     | not DE   | not DE   | not DE   | not DE  |
| EVM0013118 | LG8 | D-aminoacyl-tRNA deacylase-l    | not DE   | not DE   | not DE   | not DE  |
| EVM0023102 | LG8 | DEAD-box ATP-dependent RNA h    | not DE   | not DE   | not DE   | not DE  |
| EVM0015323 | LG8 | DELLA protein GAI1-like         | 1.222804 | 0.020025 | not DE   | not DE  |
| EVM0023248 | LG8 | DELLA protein GAIP-B-like       | not DE   | not DE   | not DE   | not DE  |
| EVM0014388 | LG8 | DNA topoisomerase 2-like        | not DE   | not DE   | not DE   | not DE  |
| EVM0011505 | LG8 | DNA-directed RNA polymerase     | not DE   | not DE   | not DE   | not DE  |
| EVM0020458 | LG8 | DNA-directed RNA polymerases    | not DE   | not DE   | 1.016711 | 0.04546 |
| EVM0002212 | LG8 | DNA/RNA-binding protein KIN1    | not DE   | not DE   | not DE   | not DE  |
| EVM0004764 | LG8 | DTW domain-containing protei    | not DE   | not DE   | not DE   | not DE  |
| EVM0000923 | LG8 | E3 ubiquitin ligase BIG BROT    | 3.077738 | 0.0231   | not DE   | not DE  |
| EVM0001461 | LG8 | E3 ubiquitin ligase BIG BROT    | not DE   | not DE   | not DE   | not DE  |
| EVM0022511 | LG8 | E3 ubiquitin ligase BIG BROT    | not DE   | not DE   | not DE   | not DE  |
| EVM0009270 | LG8 | E3 ubiquitin-protein ligase     | not DE   | not DE   | not DE   | not DE  |
| EVM0010037 | LG8 | E3 ubiquitin-protein ligase     | not DE   | not DE   | not DE   | not DE  |
| EVM0019768 | LG8 | E3 ubiquitin-protein ligase     | not DE   | not DE   | not DE   | not DE  |
| EVM0021599 | LG8 | E3 ubiquitin-protein ligase     | not DE   | not DE   | not DE   | not DE  |
| EVM0009601 | LG8 | EG45-like domain containing     | not DE   | not DE   | not DE   | not DE  |
| EVM0021560 | LG8 | EG45-like domain containing     | not DE   | not DE   | not DE   | not DE  |
| EVM0014974 | LG8 | ELMO domain-containing prote    | not DE   | not DE   | not DE   | not DE  |
| EVM0007652 | LG8 | ENHANCER OF AG-4 protein 2-l    | not DE   | not DE   | -1.02246 | 0.00065 |
| EVM0002215 | LG8 | F-box only protein 6-like       | not DE   | not DE   | not DE   | not DE  |
| EVM0022041 | LG8 | F-box protein At1g30790-like    | not DE   | not DE   | not DE   | not DE  |
| EVM0013561 | LG8 | F-box protein At1g67340-like    | not DE   | not DE   | not DE   | not DE  |
| EVM0017600 | LG8 | F-box protein CPR30-like isc    | not DE   | not DE   | not DE   | not DE  |
| EVM0023784 | LG8 | F-box protein SKIP14-like       | not DE   | not DE   | not DE   | not DE  |
| EVM0017299 | LG8 | F-box/LRR-repeat protein 4-l    | not DE   | not DE   | not DE   | not DE  |
| EVM0012009 | LG8 | F-box/kelch-repeat protein A    | -2.29826 | 0.014064 | not DE   | not DE  |
| EVM0002671 | LG8 | F-box/kelch-repeat protein S    | not DE   | not DE   | not DE   | not DE  |
| EVM0009223 | LG8 | FAM203 family protein DDB_GC    | not DE   | not DE   | not DE   | not DE  |
| EVM0016272 | LG8 | G-type lectin S-receptor-lik    | not DE   | not DE   | not DE   | not DE  |
| EVM0005889 | LG8 | GDSL esterase/lipase At3g264    | not DE   | not DE   | not DE   | not DE  |
| EVM0003020 | LG8 | GDT1-like protein 4             | not DE   | not DE   | not DE   | not DE  |
| EVM0011621 | LG8 | HIPL1 protein-like isoform X    | not DE   | not DE   | not DE   | not DE  |
| EVM0009474 | LG8 | HORMA domain-containing prot    | not DE   | not DE   | not DE   | not DE  |

|            |     |                              |          |          |          |         |
|------------|-----|------------------------------|----------|----------|----------|---------|
| EVM0017858 | LG8 | HVA22-like protein c-like    | not DE   | not DE   | 1.369266 | #####   |
| EVM0009301 | LG8 | IAA-alanine resistance prote | not DE   | not DE   | not DE   | not DE  |
| EVM0017277 | LG8 | LOB domain-containing protei | not DE   | not DE   | not DE   | not DE  |
| EVM0013969 | LG8 | LOW QUALITY PROTEIN: LRR rec | not DE   | not DE   | not DE   | not DE  |
| EVM0012051 | LG8 | LOW QUALITY PROTEIN: putativ | 1.188193 | 0.004059 | not DE   | not DE  |
| EVM0002459 | LG8 | LOW QUALITY PROTEIN: subtili | not DE   | not DE   | not DE   | not DE  |
| EVM0005148 | LG8 | LOW QUALITY PROTEIN: telomer | not DE   | not DE   | not DE   | not DE  |
| EVM0023028 | LG8 | LRR receptor-like serine/thr | not DE   | not DE   | not DE   | not DE  |
| EVM0003241 | LG8 | MADS-box transcription facto | not DE   | not DE   | not DE   | not DE  |
| EVM0022124 | LG8 | MADS-box transcription facto | not DE   | not DE   | not DE   | not DE  |
| EVM0003112 | LG8 | MATE efflux family protein 5 | not DE   | not DE   | not DE   | not DE  |
| EVM0012316 | LG8 | MATE efflux family protein 7 | not DE   | not DE   | not DE   | not DE  |
| EVM0010048 | LG8 | MATE efflux family protein 9 | not DE   | not DE   | not DE   | not DE  |
| EVM0004777 | LG8 | MLP-like protein 34          | not DE   | not DE   | 1.31446  | 0.01107 |
| EVM0006778 | LG8 | MLP-like protein 34          | not DE   | not DE   | not DE   | not DE  |
| EVM0007136 | LG8 | N-alpha-acetyltransferase 11 | not DE   | not DE   | not DE   | not DE  |
| EVM0008653 | LG8 | NAC domain-containing protei | not DE   | not DE   | not DE   | not DE  |
| EVM0015196 | LG8 | NAC domain-containing protei | not DE   | not DE   | 1.31341  | 0.04947 |
| EVM0007937 | LG8 | RNA-dependent RNA polymerase | not DE   | not DE   | not DE   | not DE  |
| EVM0019936 | LG8 | TIMELESS-interacting protein | not DE   | not DE   | not DE   | not DE  |
| EVM0013099 | LG8 | TMV resistance protein N-lik | not DE   | not DE   | not DE   | not DE  |
| EVM0007308 | LG8 | U-box domain-containing prot | not DE   | not DE   | not DE   | not DE  |
| EVM0024588 | LG8 | U-box domain-containing prot | 4.44355  | 7.64E-18 | not DE   | not DE  |
| EVM0007041 | LG8 | U-box domain-containing prot | not DE   | not DE   | not DE   | not DE  |
| EVM0004803 | LG8 | U6 snRNA-associated Sm-like  | not DE   | not DE   | not DE   | not DE  |
| EVM0017720 | LG8 | UBX domain-containing protei | not DE   | not DE   | not DE   | not DE  |
| EVM0003125 | LG8 | UDP-glycosyltransferase 89A2 | not DE   | not DE   | not DE   | not DE  |
| EVM0021784 | LG8 | UDP-glycosyltransferase 89A2 | not DE   | not DE   | not DE   | not DE  |
| EVM0000693 | LG8 | WAT1-related protein At3g28C | not DE   | not DE   | not DE   | not DE  |
| EVM0018219 | LG8 | acyl-CoA--sterol 0-acyltrans | not DE   | not DE   | not DE   | not DE  |
| EVM0020181 | LG8 | acyl-CoA--sterol 0-acyltrans | not DE   | not DE   | not DE   | not DE  |
| EVM0001351 | LG8 | alpha-N-acetylglucosaminidas | not DE   | not DE   | not DE   | not DE  |
| EVM0010501 | LG8 | alpha-galactosidase-like isc | not DE   | not DE   | not DE   | not DE  |
| EVM0007790 | LG8 | alpha-ketoglutarate-dependen | not DE   | not DE   | not DE   | not DE  |
| EVM0016608 | LG8 | alpha-xylosidase 1-like isof | not DE   | not DE   | not DE   | not DE  |
| EVM0005839 | LG8 | alpha/beta hydrolase domain- | not DE   | not DE   | not DE   | not DE  |
| EVM0018564 | LG8 | alpha/beta hydrolase domain- | not DE   | not DE   | not DE   | not DE  |
| EVM0011563 | LG8 | aluminum-activated malate tr | not DE   | not DE   | not DE   | not DE  |
| EVM0000721 | LG8 | amino-acid permease BAT1 hom | not DE   | not DE   | not DE   | not DE  |
| EVM0010058 | LG8 | anaphase-promoting complex s | not DE   | not DE   | not DE   | not DE  |
| EVM0002535 | LG8 | ankyrin repeat and sterile a | not DE   | not DE   | not DE   | not DE  |
| EVM0010380 | LG8 | annexin D3                   | not DE   | not DE   | not DE   | not DE  |
| EVM0003453 | LG8 | anther-specific proline-rich | not DE   | not DE   | not DE   | not DE  |
| EVM0013263 | LG8 | anther-specific proline-rich | not DE   | not DE   | not DE   | not DE  |
| EVM0001669 | LG8 | auxin efflux carrier compone | not DE   | not DE   | -1.25837 | 0.00021 |
| EVM0005533 | LG8 | auxin response factor 2-like | not DE   | not DE   | not DE   | not DE  |
| EVM0006821 | LG8 | auxin response factor 4-like | not DE   | not DE   | not DE   | not DE  |
| EVM0001353 | LG8 | auxin-responsive protein IAA | not DE   | not DE   | not DE   | not DE  |
| EVM0006478 | LG8 | auxin-responsive protein IAA | not DE   | not DE   | not DE   | not DE  |
| EVM0018597 | LG8 | axial regulator YABBY 4-like | not DE   | not DE   | not DE   | not DE  |
| EVM0022160 | LG8 | beta-glucosidase 12          | not DE   | not DE   | not DE   | not DE  |
| EVM0012267 | LG8 | beta-glucosidase 17-like isc | not DE   | not DE   | not DE   | not DE  |
| EVM0014375 | LG8 | beta-hexosaminidase 2        | not DE   | not DE   | not DE   | not DE  |
| EVM0001871 | LG8 | caffeoylshikimate esterase-l | not DE   | not DE   | not DE   | not DE  |

|            |     |                              |          |          |          |         |
|------------|-----|------------------------------|----------|----------|----------|---------|
| EVM0004562 | LG8 | calumenin-like isoform X1    | not DE   | not DE   | not DE   | not DE  |
| EVM0016353 | LG8 | carbonic anhydrase, chloropl | not DE   | not DE   | not DE   | not DE  |
| EVM0014287 | LG8 | carotenoid 9,10(9&apos;,10&a | not DE   | not DE   | not DE   | not DE  |
| EVM0006658 | LG8 | cation/H(+) antiporter 28-li | not DE   | not DE   | not DE   | not DE  |
| EVM0010892 | LG8 | cell division control protei | not DE   | not DE   | not DE   | not DE  |
| EVM0004020 | LG8 | cell division control protei | not DE   | not DE   | not DE   | not DE  |
| EVM0008600 | LG8 | cellulose synthase A catalyt | not DE   | not DE   | not DE   | not DE  |
| EVM0014581 | LG8 | cellulose synthase A catalyt | not DE   | not DE   | not DE   | not DE  |
| EVM0020549 | LG8 | chaperonin 60 subunit beta 4 | not DE   | not DE   | not DE   | not DE  |
| EVM0007572 | LG8 | chlorophyll a-b binding prot | -2.29997 | 8.93E-05 | not DE   | not DE  |
| EVM0015154 | LG8 | cinnamoyl-CoA reductase 1    | not DE   | not DE   | not DE   | not DE  |
| EVM0008803 | LG8 | cinnamoyl-CoA reductase 1 is | -2.41582 | 0.013084 | not DE   | not DE  |
| EVM0012624 | LG8 | cinnamoyl-CoA reductase 1 is | not DE   | not DE   | not DE   | not DE  |
| EVM0021797 | LG8 | cinnamoyl-CoA reductase 1 is | not DE   | not DE   | not DE   | not DE  |
| EVM0001172 | LG8 | citrate synthase, mitochondr | not DE   | not DE   | not DE   | not DE  |
| EVM0015970 | LG8 | cleavage and polyadenylation | not DE   | not DE   | not DE   | not DE  |
| EVM0000609 | LG8 | clustered mitochondria prote | not DE   | not DE   | -1.23446 | #####   |
| EVM0001676 | LG8 | coiled-coil domain-containin | not DE   | not DE   | not DE   | not DE  |
| EVM0003331 | LG8 | copper amine oxidase 1-like  | not DE   | not DE   | not DE   | not DE  |
| EVM0023660 | LG8 | crossover junction endonucle | not DE   | not DE   | not DE   | not DE  |
| EVM0003636 | LG8 | cyclic dof factor 3-like     | not DE   | not DE   | not DE   | not DE  |
| EVM0009164 | LG8 | cyclin-D1-binding protein 1  | not DE   | not DE   | not DE   | not DE  |
| EVM0010825 | LG8 | cysteine-rich receptor-like  | not DE   | not DE   | not DE   | not DE  |
| EVM0017888 | LG8 | cysteine-rich receptor-like  | not DE   | not DE   | not DE   | not DE  |
| EVM0020692 | LG8 | cysteine-rich repeat secret  | not DE   | not DE   | not DE   | not DE  |
| EVM0016708 | LG8 | cytochrome P450 705A5        | not DE   | not DE   | not DE   | not DE  |
| EVM0021721 | LG8 | cytochrome P450 71B37-like   | not DE   | not DE   | not DE   | not DE  |
| EVM0012463 | LG8 | cytochrome P450 734A1-like   | not DE   | not DE   | not DE   | not DE  |
| EVM0018482 | LG8 | cytochrome P450 85A1-like    | not DE   | not DE   | not DE   | not DE  |
| EVM0007085 | LG8 | delta(3,5)-Delta(2,4)-dienoy | not DE   | not DE   | not DE   | not DE  |
| EVM0021113 | LG8 | dentin sialophosphoprotein-1 | 1.287651 | 0.002797 | not DE   | not DE  |
| EVM0022842 | LG8 | dentin sialophosphoprotein-1 | not DE   | not DE   | not DE   | not DE  |
| EVM0003942 | LG8 | digestive organ expansion fa | not DE   | not DE   | not DE   | not DE  |
| EVM0017978 | LG8 | dnaJ homolog subfamily B mem | not DE   | not DE   | not DE   | not DE  |
| EVM0021223 | LG8 | double-stranded RNA-binding  | not DE   | not DE   | not DE   | not DE  |
| EVM0008519 | LG8 | dynein light chain LC6, flag | not DE   | not DE   | 1.635675 | 0.00557 |
| EVM0021631 | LG8 | early endosome antigen 1-lik | not DE   | not DE   | not DE   | not DE  |
| EVM0022998 | LG8 | endoglucanase 5-like         | not DE   | not DE   | not DE   | not DE  |
| EVM0000761 | LG8 | endoplasmic reticulum metall | not DE   | not DE   | -1.23102 | 0.0238  |
| EVM0006691 | LG8 | expansin-A1                  | not DE   | not DE   | not DE   | not DE  |
| EVM0016038 | LG8 | expansin-A1                  | not DE   | not DE   | not DE   | not DE  |
| EVM0012114 | LG8 | extracellular ribonuclease L | 5.52777  | 0.005807 | not DE   | not DE  |
| EVM0021249 | LG8 | extracellular ribonuclease L | not DE   | not DE   | not DE   | not DE  |
| EVM0013409 | LG8 | fruit protein pKIWI502-like  | not DE   | not DE   | not DE   | not DE  |
| EVM0014214 | LG8 | glucan endo-1,3-beta-glucosi | not DE   | not DE   | not DE   | not DE  |
| EVM0003238 | LG8 | glucose-6-phosphate 1-dehydr | not DE   | not DE   | not DE   | not DE  |
| EVM0022618 | LG8 | glucuronoxylan 4-O-methyltra | not DE   | not DE   | not DE   | not DE  |
| EVM0021678 | LG8 | glutaredoxin-C1-like         | not DE   | not DE   | not DE   | not DE  |
| EVM0002980 | LG8 | glutathione S-transferase Ul | not DE   | not DE   | not DE   | not DE  |
| EVM0005444 | LG8 | glutathione S-transferase Ul | not DE   | not DE   | not DE   | not DE  |
| EVM0000441 | LG8 | glycerophosphodiester phosph | not DE   | not DE   | not DE   | not DE  |
| EVM0012753 | LG8 | heat shock protein 83-like   | not DE   | not DE   | not DE   | not DE  |
| EVM0019973 | LG8 | heat shock protein 83-like   | not DE   | not DE   | not DE   | not DE  |
| EVM0024253 | LG8 | heme-binding-like protein At | not DE   | not DE   | not DE   | not DE  |

|            |     |                                         |          |          |          |         |
|------------|-----|-----------------------------------------|----------|----------|----------|---------|
| EVM0012420 | LG8 | high mobility group B protein           | not DE   | not DE   | 1.797285 | 0.01626 |
| EVM0022816 | LG8 | histidine kinase 3-like isoform         | not DE   | not DE   | not DE   | not DE  |
| EVM0006784 | LG8 | homeobox-leucine zipper protein         | not DE   | not DE   | not DE   | not DE  |
| EVM0013424 | LG8 | homeobox-leucine zipper protein         | not DE   | not DE   | not DE   | not DE  |
| EVM0000741 | LG8 | importin-4                              | not DE   | not DE   | -1.06108 | 0.00504 |
| EVM0003657 | LG8 | inactive leucine-rich repeat            | not DE   | not DE   | not DE   | not DE  |
| EVM0011174 | LG8 | inorganic phosphate transporter         | -1.04487 | 0.004485 | not DE   | not DE  |
| EVM0006982 | LG8 | katanin p80 WD40 repeat-containing      | not DE   | not DE   | not DE   | not DE  |
| EVM0004274 | LG8 | leucoanthocyanidin reductase            | not DE   | not DE   | not DE   | not DE  |
| EVM0011770 | LG8 | leucoanthocyanidin reductase            | not DE   | not DE   | not DE   | not DE  |
| EVM0006643 | LG8 | lignin-forming anionic peroxidase       | not DE   | not DE   | not DE   | not DE  |
| EVM0002061 | LG8 | lipoyxygenase 6, chloroplast            | not DE   | not DE   | not DE   | not DE  |
| EVM0013547 | LG8 | lysM domain receptor-like kinase        | not DE   | not DE   | not DE   | not DE  |
| EVM0009619 | LG8 | lysM domain-containing GPI-anchored     | not DE   | not DE   | not DE   | not DE  |
| EVM0012443 | LG8 | mediator of RNA polymerase II           | not DE   | not DE   | not DE   | not DE  |
| EVM0019502 | LG8 | microtubule-associated protein          | not DE   | not DE   | not DE   | not DE  |
| EVM0016934 | LG8 | microtubule-associated protein          | not DE   | not DE   | not DE   | not DE  |
| EVM0009846 | LG8 | mitochondrial import receptor           | not DE   | not DE   | not DE   | not DE  |
| EVM0023959 | LG8 | mitochondrial uncoupling protein        | not DE   | not DE   | not DE   | not DE  |
| EVM0014208 | LG8 | mitotic spindle checkpoint protein      | not DE   | not DE   | 2.703109 | 0.03454 |
| EVM0020126 | LG8 | monoacylglycerol lipase ABHD11          | -2.32198 | 2.09E-08 | not DE   | not DE  |
| EVM0008965 | LG8 | multiple C2 and transmembrane domain    | not DE   | not DE   | not DE   | not DE  |
| EVM0017640 | LG8 | myb family transcription factor         | not DE   | not DE   | not DE   | not DE  |
| EVM0015787 | LG8 | myb-related protein A-like isoform      | not DE   | not DE   | not DE   | not DE  |
| EVM0014246 | LG8 | myosin-1-like                           | not DE   | not DE   | not DE   | not DE  |
| EVM0015451 | LG8 | neurolysin, mitochondrial-like          | not DE   | not DE   | not DE   | not DE  |
| EVM0000216 | LG8 | nicotinate-nucleotide pyrophosphorylase | not DE   | not DE   | not DE   | not DE  |
| EVM0001730 | LG8 | nicotinate-nucleotide pyrophosphorylase | not DE   | not DE   | not DE   | not DE  |
| EVM0006236 | LG8 | non-functional NADPH-dependent          | not DE   | not DE   | not DE   | not DE  |
| EVM0013405 | LG8 | non-functional NADPH-dependent          | -3.20159 | 5.27E-05 | not DE   | not DE  |
| EVM0018772 | LG8 | non-functional NADPH-dependent          | not DE   | not DE   | not DE   | not DE  |
| EVM0017984 | LG8 | non-specific lipid-transfer protein     | 1.484735 | 0.007105 | not DE   | not DE  |
| EVM0004628 | LG8 | non-specific lipid-transfer protein     | not DE   | not DE   | not DE   | not DE  |
| EVM0007435 | LG8 | nuclear factor of activated T-cells     | 1.34157  | 8.52E-05 | not DE   | not DE  |
| EVM0001451 | LG8 | omega-hydroxypalmitate O-ferredoxin     | not DE   | not DE   | not DE   | not DE  |
| EVM0005552 | LG8 | origin recognition complex subunit      | not DE   | not DE   | not DE   | not DE  |
| EVM0015001 | LG8 | outer envelope pore protein             | not DE   | not DE   | not DE   | not DE  |
| EVM0003256 | LG8 | pentatricopeptide repeat-containing     | not DE   | not DE   | not DE   | not DE  |
| EVM0007290 | LG8 | pentatricopeptide repeat-containing     | 1.99132  | 0.000402 | not DE   | not DE  |
| EVM0024451 | LG8 | pentatricopeptide repeat-containing     | not DE   | not DE   | not DE   | not DE  |
| EVM0018334 | LG8 | pentatricopeptide repeat-containing     | not DE   | not DE   | not DE   | not DE  |
| EVM0014542 | LG8 | pentatricopeptide repeat-containing     | not DE   | not DE   | not DE   | not DE  |
| EVM0016167 | LG8 | pentatricopeptide repeat-containing     | not DE   | not DE   | not DE   | not DE  |
| EVM0012981 | LG8 | pentatricopeptide repeat-containing     | 2.185554 | 0.006757 | not DE   | not DE  |
| EVM0024317 | LG8 | pentatricopeptide repeat-containing     | not DE   | not DE   | not DE   | not DE  |
| EVM0022423 | LG8 | pentatricopeptide repeat-containing     | not DE   | not DE   | not DE   | not DE  |
| EVM0013038 | LG8 | pentatricopeptide repeat-containing     | not DE   | not DE   | not DE   | not DE  |
| EVM0014752 | LG8 | pentatricopeptide repeat-containing     | 1.904888 | 0.003707 | not DE   | not DE  |
| EVM0008170 | LG8 | pentatricopeptide repeat-containing     | not DE   | not DE   | not DE   | not DE  |
| EVM0001758 | LG8 | pentatricopeptide repeat-containing     | not DE   | not DE   | not DE   | not DE  |
| EVM0018443 | LG8 | pentatricopeptide repeat-containing     | not DE   | not DE   | not DE   | not DE  |
| EVM0020767 | LG8 | pentatricopeptide repeat-containing     | not DE   | not DE   | not DE   | not DE  |
| EVM0021070 | LG8 | peptidyl-prolyl cis-trans isomerase     | not DE   | not DE   | not DE   | not DE  |
| EVM0001324 | LG8 | peroxisomal membrane protein            | not DE   | not DE   | not DE   | not DE  |

|            |     |                               |          |          |        |        |
|------------|-----|-------------------------------|----------|----------|--------|--------|
| EVM0018982 | LG8 | photosystem II core complex   | -2.07372 | 2.03E-05 | not DE | not DE |
| EVM0006683 | LG8 | phytochrome-associated serin  | not DE   | not DE   | not DE | not DE |
| EVM0011875 | LG8 | phytosulfokines 4-like        | not DE   | not DE   | not DE | not DE |
| EVM0008017 | LG8 | polygalacturonase Atlg48100-  | not DE   | not DE   | not DE | not DE |
| EVM0009158 | LG8 | polygalacturonase-like        | not DE   | not DE   | not DE | not DE |
| EVM0020850 | LG8 | polyvinylalcohol dehydrogena  | not DE   | not DE   | not DE | not DE |
| EVM0019863 | LG8 | pre-mRNA-splicing factor ATP  | not DE   | not DE   | not DE | not DE |
| EVM0015734 | LG8 | probable ADP-ribosylation fan | not DE   | not DE   | not DE | not DE |
| EVM0017545 | LG8 | probable E3 ubiquitin-protein | not DE   | not DE   | not DE | not DE |
| EVM0001729 | LG8 | probable E3 ubiquitin-protein | not DE   | not DE   | not DE | not DE |
| EVM0011847 | LG8 | probable E3 ubiquitin-protein | not DE   | not DE   | not DE | not DE |
| EVM0007872 | LG8 | probable LRR receptor-like s  | not DE   | not DE   | not DE | not DE |
| EVM0022074 | LG8 | probable LRR receptor-like s  | not DE   | not DE   | not DE | not DE |
| EVM0021666 | LG8 | probable WRKY transcription   | not DE   | not DE   | not DE | not DE |
| EVM0003950 | LG8 | probable WRKY transcription   | not DE   | not DE   | not DE | not DE |
| EVM0024356 | LG8 | probable apyrase 6-like       | not DE   | not DE   | not DE | not DE |
| EVM0016704 | LG8 | probable aquaporin NIP-type   | not DE   | not DE   | not DE | not DE |
| EVM0008078 | LG8 | probable ascorbate-specific   | not DE   | not DE   | not DE | not DE |
| EVM0015056 | LG8 | probable carboxylesterase 6   | not DE   | not DE   | not DE | not DE |
| EVM0005860 | LG8 | probable galacturonosyltrans  | not DE   | not DE   | not DE | not DE |
| EVM0020937 | LG8 | probable galacturonosyltrans  | not DE   | not DE   | not DE | not DE |
| EVM0004804 | LG8 | probable inactive poly        | not DE   | not DE   | not DE | not DE |
| EVM0019126 | LG8 | probable inactive purple aci  | not DE   | not DE   | not DE | not DE |
| EVM0014855 | LG8 | probable inactive purple aci  | not DE   | not DE   | not DE | not DE |
| EVM0003045 | LG8 | probable leucine-rich repeat  | not DE   | not DE   | not DE | not DE |
| EVM0004687 | LG8 | probable methyltransferase P  | not DE   | not DE   | not DE | not DE |
| EVM0006025 | LG8 | probable nucleoredoxin 1-lik  | not DE   | not DE   | not DE | not DE |
| EVM0017547 | LG8 | probable nucleoredoxin 1-lik  | not DE   | not DE   | not DE | not DE |
| EVM0018435 | LG8 | probable pectate lyase 5      | not DE   | not DE   | not DE | not DE |
| EVM0021898 | LG8 | probable potassium transport  | not DE   | not DE   | not DE | not DE |
| EVM0016611 | LG8 | probable protein S-acyltrans  | not DE   | not DE   | not DE | not DE |
| EVM0010609 | LG8 | probable receptor protein kin | not DE   | not DE   | not DE | not DE |
| EVM0001384 | LG8 | probable receptor-like prote  | not DE   | not DE   | not DE | not DE |
| EVM0012244 | LG8 | probable receptor-like prote  | not DE   | not DE   | not DE | not DE |
| EVM0017330 | LG8 | probable receptor-like prote  | not DE   | not DE   | not DE | not DE |
| EVM0017464 | LG8 | probable receptor-like prote  | not DE   | not DE   | not DE | not DE |
| EVM0017770 | LG8 | probable receptor-like prote  | not DE   | not DE   | not DE | not DE |
| EVM0018913 | LG8 | probable receptor-like prote  | not DE   | not DE   | not DE | not DE |
| EVM0018959 | LG8 | probable receptor-like prote  | not DE   | not DE   | not DE | not DE |
| EVM0020261 | LG8 | probable receptor-like prote  | not DE   | not DE   | not DE | not DE |
| EVM0009630 | LG8 | probable receptor-like prote  | not DE   | not DE   | not DE | not DE |
| EVM0024524 | LG8 | probable replication factor   | not DE   | not DE   | not DE | not DE |
| EVM0012768 | LG8 | probable ribose-5-phosphate   | not DE   | not DE   | not DE | not DE |
| EVM0003322 | LG8 | probable serine/threonine-pr  | not DE   | not DE   | not DE | not DE |
| EVM0021210 | LG8 | probable serine/threonine-pr  | not DE   | not DE   | not DE | not DE |
| EVM0010092 | LG8 | probable signal peptidase co  | not DE   | not DE   | not DE | not DE |
| EVM0014904 | LG8 | probable sulfate transporter  | not DE   | not DE   | not DE | not DE |
| EVM0006500 | LG8 | probable transmembrane ascor  | not DE   | not DE   | not DE | not DE |
| EVM0021615 | LG8 | proline-rich receptor-like p  | not DE   | not DE   | not DE | not DE |
| EVM0011577 | LG8 | proline-rich receptor-like p  | not DE   | not DE   | not DE | not DE |
| EVM0001492 | LG8 | prolyl endopeptidase-like is  | not DE   | not DE   | not DE | not DE |
| EVM0005769 | LG8 | proteasome subunit beta type  | not DE   | not DE   | not DE | not DE |
| EVM0002985 | LG8 | protein ACCUMULATION AND REP  | not DE   | not DE   | not DE | not DE |
| EVM0008694 | LG8 | protein BCCIP homolog isoform | not DE   | not DE   | not DE | not DE |

|            |     |                               |          |          |          |         |
|------------|-----|-------------------------------|----------|----------|----------|---------|
| EVM0018010 | LG8 | protein CRABS CLAW-like       | not DE   | not DE   | not DE   | not DE  |
| EVM0002382 | LG8 | protein FAR1-RELATED SEQUENC  | not DE   | not DE   | not DE   | not DE  |
| EVM0012370 | LG8 | protein FAR1-RELATED SEQUENC  | not DE   | not DE   | not DE   | not DE  |
| EVM0006848 | LG8 | protein IQ-DOMAIN 14-like is  | not DE   | not DE   | 1.272095 | 0.00135 |
| EVM0006911 | LG8 | protein IQ-DOMAIN 31-like is  | not DE   | not DE   | not DE   | not DE  |
| EVM0011489 | LG8 | protein Iojap-related, mitoc  | not DE   | not DE   | not DE   | not DE  |
| EVM0017796 | LG8 | protein KTI12 homolog         | not DE   | not DE   | not DE   | not DE  |
| EVM0008416 | LG8 | protein MKS1                  | not DE   | not DE   | not DE   | not DE  |
| EVM0008111 | LG8 | protein O-linked-mannose bet  | not DE   | not DE   | not DE   | not DE  |
| EVM0012401 | LG8 | protein O-linked-mannose bet  | not DE   | not DE   | not DE   | not DE  |
| EVM0006321 | LG8 | protein OBERON 4-like         | not DE   | not DE   | not DE   | not DE  |
| EVM0018703 | LG8 | protein PHYLL0, chloroplasti  | not DE   | not DE   | not DE   | not DE  |
| EVM0013748 | LG8 | protein PLANT CADMIUM RESIST  | not DE   | not DE   | not DE   | not DE  |
| EVM0004924 | LG8 | protein PLANT CADMIUM RESIST  | -2.12266 | 0.018817 | not DE   | not DE  |
| EVM0012490 | LG8 | protein PLANT CADMIUM RESIST  | not DE   | not DE   | 1.125136 | 0.00175 |
| EVM0007373 | LG8 | protein POLLEN DEFECTIVE IN   | not DE   | not DE   | not DE   | not DE  |
| EVM0005828 | LG8 | protein SPIRAL1-like 1        | not DE   | not DE   | not DE   | not DE  |
| EVM0005856 | LG8 | protein TRANSPARENT TESTA 12  | not DE   | not DE   | not DE   | not DE  |
| EVM0015517 | LG8 | protein TRANSPARENT TESTA 12  | not DE   | not DE   | not DE   | not DE  |
| EVM0017958 | LG8 | protein TRANSPARENT TESTA 12  | not DE   | not DE   | not DE   | not DE  |
| EVM0012204 | LG8 | protein TWIN LOV 1-like isof  | not DE   | not DE   | not DE   | not DE  |
| EVM0003285 | LG8 | protein VAC14 homolog isoform | not DE   | not DE   | not DE   | not DE  |
| EVM0005135 | LG8 | protein VAC14 homolog isoform | not DE   | not DE   | not DE   | not DE  |
| EVM0024084 | LG8 | protein gamma response 1-like | not DE   | not DE   | not DE   | not DE  |
| EVM0015147 | LG8 | protein kinase APK1A, chloro  | not DE   | not DE   | not DE   | not DE  |
| EVM0021189 | LG8 | protein terminal ear1-like    | not DE   | not DE   | not DE   | not DE  |
| EVM0014110 | LG8 | protein transport protein SE  | not DE   | not DE   | not DE   | not DE  |
| EVM0023053 | LG8 | protein-S-isoprenylcysteine   | not DE   | not DE   | not DE   | not DE  |
| EVM0002203 | LG8 | purple acid phosphatase 17-l  | not DE   | not DE   | not DE   | not DE  |
| EVM0009261 | LG8 | putative SNAP25 homologous p  | 1.266298 | 0.002963 | not DE   | not DE  |
| EVM0004093 | LG8 | putative disease resistance   | not DE   | not DE   | not DE   | not DE  |
| EVM0015824 | LG8 | putative disease resistance   | not DE   | not DE   | not DE   | not DE  |
| EVM0014005 | LG8 | putative disease resistance   | not DE   | not DE   | not DE   | not DE  |
| EVM0001232 | LG8 | putative disease resistance   | not DE   | not DE   | not DE   | not DE  |
| EVM0014883 | LG8 | putative disease resistance   | not DE   | not DE   | not DE   | not DE  |
| EVM0019750 | LG8 | putative disease resistance   | not DE   | not DE   | not DE   | not DE  |
| EVM0022023 | LG8 | putative disease resistance   | not DE   | not DE   | not DE   | not DE  |
| EVM0003196 | LG8 | putative disease resistance   | not DE   | not DE   | not DE   | not DE  |
| EVM0001241 | LG8 | putative fasciclin-like arab  | not DE   | not DE   | not DE   | not DE  |
| EVM0000150 | LG8 | putative glutamine amidotran  | not DE   | not DE   | not DE   | not DE  |
| EVM0009360 | LG8 | putative multidrug resistanc  | not DE   | not DE   | not DE   | not DE  |
| EVM0019769 | LG8 | putative nuclear matrix cons  | not DE   | not DE   | not DE   | not DE  |
| EVM0006676 | LG8 | putative pectinesterase/pect  | not DE   | not DE   | not DE   | not DE  |
| EVM0015584 | LG8 | putative pectinesterase/pect  | not DE   | not DE   | not DE   | not DE  |
| EVM0010599 | LG8 | putative pentatricopeptide r  | not DE   | not DE   | not DE   | not DE  |
| EVM0021570 | LG8 | putative pentatricopeptide r  | not DE   | not DE   | not DE   | not DE  |
| EVM0002927 | LG8 | putative pentatricopeptide r  | not DE   | not DE   | not DE   | not DE  |
| EVM0018938 | LG8 | putative pentatricopeptide r  | not DE   | not DE   | not DE   | not DE  |
| EVM0011354 | LG8 | putative pentatricopeptide r  | not DE   | not DE   | not DE   | not DE  |
| EVM0018201 | LG8 | putative pentatricopeptide r  | 1.356519 | 0.015313 | not DE   | not DE  |
| EVM0000839 | LG8 | putative pentatricopeptide r  | not DE   | not DE   | not DE   | not DE  |
| EVM0000886 | LG8 | putative phospholipid-transp  | not DE   | not DE   | -1.26654 | 0.04577 |
| EVM0007494 | LG8 | putative ribonuclease H prot  | not DE   | not DE   | not DE   | not DE  |
| EVM0013667 | LG8 | pyroglutamyl-peptidase 1-lik  | not DE   | not DE   | not DE   | not DE  |



|            |     |                                        |          |          |         |        |
|------------|-----|----------------------------------------|----------|----------|---------|--------|
| EVM0009206 | LG8 | rRNA biogenesis protein RRP3           | not DE   | not DE   | not DE  | not DE |
| EVM0016694 | LG8 | ras GTPase-activating protein          | not DE   | not DE   | not DE  | not DE |
| EVM0024449 | LG8 | ras-related protein RGP1               | not DE   | not DE   | not DE  | not DE |
| EVM0023644 | LG8 | repressor of RNA polymerase            | not DE   | not DE   | not DE  | not DE |
| EVM0013944 | LG8 | ribulose biphosphate carboxylase       | -1.85731 | 0.018929 | not DE  | not DE |
| EVM0005388 | LG8 | scarecrow-like protein 3 isoform       | not DE   | not DE   | not DE  | not DE |
| EVM0023505 | LG8 | serine carboxypeptidase-like           | not DE   | not DE   | not DE  | not DE |
| EVM0015175 | LG8 | serine/arginine-rich splicing          | not DE   | not DE   | not DE  | not DE |
| EVM0013131 | LG8 | serine/threonine protein phosphatase   | not DE   | not DE   | not DE  | not DE |
| EVM0012004 | LG8 | serine/threonine-protein kinase        | not DE   | not DE   | not DE  | not DE |
| EVM0017385 | LG8 | serine/threonine-protein kinase        | not DE   | not DE   | not DE  | not DE |
| EVM0014128 | LG8 | serine/threonine-protein kinase        | not DE   | not DE   | not DE  | not DE |
| EVM0016994 | LG8 | serine/threonine-protein kinase        | not DE   | not DE   | not DE  | not DE |
| EVM0020719 | LG8 | single-stranded DNA-binding protein    | not DE   | not DE   | not DE  | not DE |
| EVM0020828 | LG8 | sister chromatid cohesion 1            | not DE   | not DE   | not DE  | not DE |
| EVM0003713 | LG8 | sodium/hydrogen exchanger 7            | not DE   | not DE   | not DE  | not DE |
| EVM0015433 | LG8 | somatic embryogenesis receptor         | not DE   | not DE   | not DE  | not DE |
| EVM0021049 | LG8 | spindle assembly abnormal protein      | not DE   | not DE   | not DE  | not DE |
| EVM0021684 | LG8 | sulfhydryl oxidase 2-like isoform      | not DE   | not DE   | not DE  | not DE |
| EVM0015882 | LG8 | thioredoxin H2-like                    | -1.14307 | 0.002418 | not DE  | not DE |
| EVM0010354 | LG8 | threonine--tRNA ligase, mitochondrial  | not DE   | not DE   | not DE  | not DE |
| EVM0012957 | LG8 | transcription and mRNA export          | not DE   | not DE   | not DE  | not DE |
| EVM0007719 | LG8 | transcription factor PIF3-like         | not DE   | not DE   | not DE  | not DE |
| EVM0012932 | LG8 | transcription factor PIF3-like         | not DE   | not DE   | not DE  | not DE |
| EVM0005670 | LG8 | transcription factor RAX1              | not DE   | not DE   | not DE  | not DE |
| EVM0015593 | LG8 | transcription factor RAX1              | not DE   | not DE   | not DE  | not DE |
| EVM0016670 | LG8 | transcription factor TCP20-like        | not DE   | not DE   | not DE  | not DE |
| EVM0016289 | LG8 | transcription factor bHLH111           | not DE   | not DE   | not DE  | not DE |
| EVM0022366 | LG8 | transcription factor bHLH130           | not DE   | not DE   | not DE  | not DE |
| EVM0002288 | LG8 | transcription factor bHLH49            | not DE   | not DE   | not DE  | not DE |
| EVM0012417 | LG8 | transcription factor bHLH90            | not DE   | not DE   | not DE  | not DE |
| EVM0001744 | LG8 | transcription initiation factor        | not DE   | not DE   | not DE  | not DE |
| EVM0023819 | LG8 | transcription repressor MYB4           | -1.65216 | 0.023231 | not DE  | not DE |
| EVM0022040 | LG8 | triose phosphate/phosphate transporter | not DE   | not DE   | not DE  | not DE |
| EVM0005767 | LG8 | tubulin-folding cofactor E-1           | -1.22384 | 0.018516 | not DE  | not DE |
| EVM0013238 | LG8 | two-component response regulator       | 1.012242 | 0.039808 | not DE  | not DE |
| EVM0007961 | LG8 | ubiquinone biosynthesis protein        | not DE   | not DE   | not DE  | not DE |
| EVM0002233 | LG8 | ubiquitin receptor RAD23c-like         | not DE   | not DE   | not DE  | not DE |
| EVM0009019 | LG8 | ubiquitin-40S ribosomal protein        | not DE   | not DE   | not DE  | not DE |
| EVM0018477 | LG8 | ubiquitin-like-specific protease       | not DE   | not DE   | not DE  | not DE |
| EVM0000833 | LG8 | uncharacterized PKHD-type hydrolase    | -1.96086 | 8.39E-14 | -1.2366 | #####  |
| EVM0011598 | LG8 | uncharacterized RING finger            | not DE   | not DE   | not DE  | not DE |
| EVM0022804 | LG8 | uncharacterized protein At1g           | not DE   | not DE   | not DE  | not DE |
| EVM0011928 | LG8 | uncharacterized protein At1g           | not DE   | not DE   | not DE  | not DE |
| EVM0005836 | LG8 | uncharacterized protein At3g           | not DE   | not DE   | not DE  | not DE |
| EVM0021770 | LG8 | uncharacterized protein At3g           | not DE   | not DE   | not DE  | not DE |
| EVM0021448 | LG8 | uncharacterized protein DDB1           | not DE   | not DE   | not DE  | not DE |
| EVM0009283 | LG8 | uncharacterized protein LOC1           | not DE   | not DE   | not DE  | not DE |
| EVM0001941 | LG8 | uncharacterized protein LOC1           | not DE   | not DE   | not DE  | not DE |
| EVM0011048 | LG8 | uncharacterized protein LOC1           | not DE   | not DE   | not DE  | not DE |
| EVM0018600 | LG8 | uncharacterized protein LOC1           | not DE   | not DE   | not DE  | not DE |
| EVM0011249 | LG8 | uncharacterized protein LOC1           | not DE   | not DE   | not DE  | not DE |
| EVM0006927 | LG8 | uncharacterized protein LOC1           | not DE   | not DE   | not DE  | not DE |
| EVM0019005 | LG8 | uncharacterized protein LOC1           | not DE   | not DE   | not DE  | not DE |

|            |     |                              |          |          |          |         |
|------------|-----|------------------------------|----------|----------|----------|---------|
| EVM0006887 | LG8 | uncharacterized protein LOC1 | not DE   | not DE   | not DE   | not DE  |
| EVM0009483 | LG8 | uncharacterized protein LOC1 | not DE   | not DE   | not DE   | not DE  |
| EVM0006953 | LG8 | uncharacterized protein LOC1 | not DE   | not DE   | not DE   | not DE  |
| EVM0010321 | LG8 | uncharacterized protein LOC1 | not DE   | not DE   | not DE   | not DE  |
| EVM0008261 | LG8 | uncharacterized protein LOC1 | not DE   | not DE   | not DE   | not DE  |
| EVM0023238 | LG8 | uncharacterized protein LOC1 | not DE   | not DE   | not DE   | not DE  |
| EVM0010160 | LG8 | uncharacterized protein LOC1 | not DE   | not DE   | not DE   | not DE  |
| EVM0013220 | LG8 | uncharacterized protein LOC1 | not DE   | not DE   | not DE   | not DE  |
| EVM0016533 | LG8 | uncharacterized protein LOC1 | not DE   | not DE   | not DE   | not DE  |
| EVM0021231 | LG8 | uncharacterized protein LOC1 | not DE   | not DE   | not DE   | not DE  |
| EVM0011238 | LG8 | uncharacterized protein LOC1 | not DE   | not DE   | not DE   | not DE  |
| EVM0015992 | LG8 | uncharacterized protein LOC1 | not DE   | not DE   | not DE   | not DE  |
| EVM0020577 | LG8 | uncharacterized protein LOC1 | not DE   | not DE   | not DE   | not DE  |
| EVM0009821 | LG8 | uncharacterized protein LOC1 | not DE   | not DE   | not DE   | not DE  |
| EVM0009996 | LG8 | uncharacterized protein LOC1 | not DE   | not DE   | not DE   | not DE  |
| EVM0007302 | LG8 | uncharacterized protein LOC1 | not DE   | not DE   | not DE   | not DE  |
| EVM0001416 | LG8 | uncharacterized protein LOC1 | not DE   | not DE   | -1.26423 | 0.00175 |
| EVM0005855 | LG8 | uncharacterized protein LOC1 | not DE   | not DE   | not DE   | not DE  |
| EVM0009117 | LG8 | uncharacterized protein LOC1 | 1.001128 | 0.032923 | not DE   | not DE  |
| EVM0005847 | LG8 | uncharacterized protein LOC1 | not DE   | not DE   | not DE   | not DE  |
| EVM0003699 | LG8 | uncharacterized protein LOC1 | not DE   | not DE   | not DE   | not DE  |
| EVM0014274 | LG8 | uncharacterized protein LOC1 | not DE   | not DE   | not DE   | not DE  |
| EVM0023197 | LG8 | uncharacterized protein LOC1 | not DE   | not DE   | not DE   | not DE  |
| EVM0003223 | LG8 | uncharacterized protein LOC1 | not DE   | not DE   | not DE   | not DE  |
| EVM0000168 | LG8 | uncharacterized protein LOC1 | not DE   | not DE   | not DE   | not DE  |
| EVM0008876 | LG8 | uncharacterized protein LOC1 | not DE   | not DE   | not DE   | not DE  |
| EVM0018802 | LG8 | uncharacterized protein LOC1 | not DE   | not DE   | not DE   | not DE  |
| EVM0000323 | LG8 | uncharacterized protein LOC1 | not DE   | not DE   | not DE   | not DE  |
| EVM0006191 | LG8 | uncharacterized protein LOC1 | not DE   | not DE   | not DE   | not DE  |
| EVM0021160 | LG8 | uncharacterized protein LOC1 | not DE   | not DE   | -1.12072 | 0.00423 |
| EVM0009923 | LG8 | uncharacterized protein LOC1 | not DE   | not DE   | not DE   | not DE  |
| EVM0012182 | LG8 | uncharacterized protein LOC1 | not DE   | not DE   | not DE   | not DE  |
| EVM0023855 | LG8 | uncharacterized protein LOC1 | not DE   | not DE   | not DE   | not DE  |
| EVM0015423 | LG8 | uncharacterized protein LOC1 | not DE   | not DE   | not DE   | not DE  |
| EVM0005934 | LG8 | uncharacterized protein LOC1 | not DE   | not DE   | not DE   | not DE  |
| EVM0006809 | LG8 | uncharacterized protein LOC1 | not DE   | not DE   | not DE   | not DE  |
| EVM0004226 | LG8 | uncharacterized protein LOC1 | not DE   | not DE   | not DE   | not DE  |
| EVM0007048 | LG8 | uncharacterized protein LOC1 | not DE   | not DE   | not DE   | not DE  |
| EVM0023796 | LG8 | uncharacterized protein LOC1 | not DE   | not DE   | not DE   | not DE  |
| EVM0015532 | LG8 | uncharacterized protein LOC1 | not DE   | not DE   | not DE   | not DE  |
| EVM0016019 | LG8 | uncharacterized protein LOC1 | not DE   | not DE   | 1.062071 | #####   |
| EVM0010933 | LG8 | uncharacterized protein LOC1 | not DE   | not DE   | not DE   | not DE  |
| EVM0021248 | LG8 | uncharacterized protein LOC1 | not DE   | not DE   | not DE   | not DE  |
| EVM0004833 | LG8 | uncharacterized protein LOC1 | not DE   | not DE   | not DE   | not DE  |
| EVM0001433 | LG8 | uncharacterized protein LOC1 | not DE   | not DE   | not DE   | not DE  |
| EVM0016536 | LG8 | uncharacterized protein LOC1 | not DE   | not DE   | not DE   | not DE  |
| EVM0013266 | LG8 | uncharacterized protein LOC1 | not DE   | not DE   | not DE   | not DE  |
| EVM0002536 | LG8 | uncharacterized protein LOC1 | not DE   | not DE   | not DE   | not DE  |
| EVM0012849 | LG8 | uncharacterized protein LOC1 | not DE   | not DE   | -1.11514 | 0.00011 |
| EVM0002213 | LG8 | uncharacterized protein LOC1 | not DE   | not DE   | not DE   | not DE  |
| EVM0020137 | LG8 | uncharacterized protein LOC1 | not DE   | not DE   | not DE   | not DE  |
| EVM0003437 | LG8 | uncharacterized protein LOC1 | not DE   | not DE   | not DE   | not DE  |
| EVM0023006 | LG8 | uncharacterized protein LOC1 | not DE   | not DE   | not DE   | not DE  |
| EVM0014896 | LG8 | uncharacterized protein LOC1 | not DE   | not DE   | not DE   | not DE  |

|            |     |                              |          |          |          |         |
|------------|-----|------------------------------|----------|----------|----------|---------|
| EVM0013582 | LG8 | uncharacterized protein LOC1 | not DE   | not DE   | not DE   | not DE  |
| EVM0015401 | LG8 | uncharacterized protein LOC1 | not DE   | not DE   | not DE   | not DE  |
| EVM0010953 | LG8 | uncharacterized protein LOC1 | not DE   | not DE   | not DE   | not DE  |
| EVM0001391 | LG8 | uncharacterized protein LOC1 | not DE   | not DE   | not DE   | not DE  |
| EVM0021877 | LG8 | uncharacterized protein LOC1 | not DE   | not DE   | not DE   | not DE  |
| EVM0001326 | LG8 | uncharacterized protein LOC1 | not DE   | not DE   | not DE   | not DE  |
| EVM0022425 | LG8 | uncharacterized protein LOC1 | not DE   | not DE   | not DE   | not DE  |
| EVM0011441 | LG8 | uncharacterized protein LOC1 | not DE   | not DE   | not DE   | not DE  |
| EVM0008924 | LG8 | uncharacterized protein LOC1 | not DE   | not DE   | not DE   | not DE  |
| EVM0021969 | LG8 | uncharacterized protein LOC1 | not DE   | not DE   | not DE   | not DE  |
| EVM0001903 | LG8 | uncharacterized protein LOC1 | not DE   | not DE   | not DE   | not DE  |
| EVM0003744 | LG8 | uncharacterized protein LOC1 | not DE   | not DE   | 1.033707 | 0.04771 |
| EVM0008192 | LG8 | uncharacterized protein LOC1 | not DE   | not DE   | not DE   | not DE  |
| EVM0009352 | LG8 | uncharacterized protein LOC1 | not DE   | not DE   | not DE   | not DE  |
| EVM0006445 | LG8 | uncharacterized protein LOC1 | not DE   | not DE   | not DE   | not DE  |
| EVM0008224 | LG8 | uncharacterized protein LOC1 | not DE   | not DE   | not DE   | not DE  |
| EVM0006309 | LG8 | uncharacterized protein LOC1 | not DE   | not DE   | not DE   | not DE  |
| EVM0024083 | LG8 | uncharacterized protein LOC1 | not DE   | not DE   | not DE   | not DE  |
| EVM0023563 | LG8 | uncharacterized protein LOC1 | not DE   | not DE   | not DE   | not DE  |
| EVM0015152 | LG8 | uncharacterized protein LOC1 | 1.755522 | 0.016322 | not DE   | not DE  |
| EVM0003598 | LG8 | uncharacterized protein LOC1 | not DE   | not DE   | not DE   | not DE  |
| EVM0010343 | LG8 | uncharacterized protein LOC1 | not DE   | not DE   | not DE   | not DE  |
| EVM0013489 | LG8 | uncharacterized protein LOC1 | not DE   | not DE   | not DE   | not DE  |
| EVM0004086 | LG8 | uncharacterized protein LOC1 | not DE   | not DE   | not DE   | not DE  |
| EVM0006765 | LG8 | uncharacterized protein LOC1 | not DE   | not DE   | not DE   | not DE  |
| EVM0010436 | LG8 | uncharacterized protein LOC1 | not DE   | not DE   | not DE   | not DE  |
| EVM0024281 | LG8 | uncharacterized protein LOC1 | not DE   | not DE   | not DE   | not DE  |
| EVM0018760 | LG8 | uncharacterized protein LOC1 | not DE   | not DE   | not DE   | not DE  |
| EVM0013347 | LG8 | uncharacterized protein LOC1 | not DE   | not DE   | not DE   | not DE  |
| EVM0005593 | LG8 | uncharacterized protein LOC1 | not DE   | not DE   | not DE   | not DE  |
| EVM0008254 | LG8 | uncharacterized protein LOC1 | -1.07227 | 0.006755 | not DE   | not DE  |
| EVM0023947 | LG8 | uncharacterized protein LOC1 | not DE   | not DE   | not DE   | not DE  |
| EVM0014264 | LG8 | uncharacterized protein LOC1 | not DE   | not DE   | not DE   | not DE  |
| EVM0017170 | LG8 | uncharacterized protein LOC1 | not DE   | not DE   | 1.057668 | 0.00103 |
| EVM0000078 | LG8 | uncharacterized protein LOC1 | not DE   | not DE   | not DE   | not DE  |
| EVM0003085 | LG8 | uncharacterized protein LOC1 | not DE   | not DE   | not DE   | not DE  |
| EVM0004486 | LG8 | uncharacterized protein LOC1 | not DE   | not DE   | not DE   | not DE  |
| EVM0000579 | LG8 | uncharacterized protein LOC1 | not DE   | not DE   | not DE   | not DE  |
| EVM0007850 | LG8 | uncharacterized protein LOC1 | not DE   | not DE   | not DE   | not DE  |
| EVM0014381 | LG8 | uncharacterized protein LOC1 | not DE   | not DE   | not DE   | not DE  |
| EVM0018947 | LG8 | uncharacterized protein LOC1 | not DE   | not DE   | not DE   | not DE  |
| EVM0021228 | LG8 | uncharacterized protein LOC1 | not DE   | not DE   | not DE   | not DE  |
| EVM0011657 | LG8 | uncharacterized protein LOC1 | not DE   | not DE   | not DE   | not DE  |
| EVM0022064 | LG8 | uncharacterized protein LOC1 | not DE   | not DE   | not DE   | not DE  |
| EVM0003913 | LG8 | uncharacterized protein LOC1 | not DE   | not DE   | not DE   | not DE  |
| EVM0000410 | LG8 | uncharacterized protein LOC1 | not DE   | not DE   | not DE   | not DE  |
| EVM0010440 | LG8 | uncharacterized protein LOC1 | not DE   | not DE   | not DE   | not DE  |
| EVM0003899 | LG8 | uncharacterized protein LOC1 | not DE   | not DE   | not DE   | not DE  |
| EVM0004070 | LG8 | uncharacterized protein LOC1 | not DE   | not DE   | not DE   | not DE  |
| EVM0022188 | LG8 | uncharacterized protein LOC1 | not DE   | not DE   | not DE   | not DE  |
| EVM0022252 | LG8 | uncharacterized protein LOC1 | not DE   | not DE   | not DE   | not DE  |
| EVM0001867 | LG8 | uncharacterized protein LOC1 | not DE   | not DE   | 2.894322 | 0.0061  |
| EVM0002516 | LG8 | uncharacterized protein LOC1 | not DE   | not DE   | not DE   | not DE  |
| EVM0010914 | LG8 | uncharacterized protein LOC1 | not DE   | not DE   | not DE   | not DE  |

|            |     |                               |          |          |          |         |
|------------|-----|-------------------------------|----------|----------|----------|---------|
| EVM0004261 | LG8 | uncharacterized protein LOC1  | not DE   | not DE   | not DE   | not DE  |
| EVM0023889 | LG8 | uncharacterized protein LOC1  | not DE   | not DE   | not DE   | not DE  |
| EVM0018383 | LG8 | uncharacterized protein LOC1  | not DE   | not DE   | not DE   | not DE  |
| EVM0013785 | LG8 | uncharacterized protein LOC1  | 3.280109 | 0.000342 | not DE   | not DE  |
| EVM0013592 | LG8 | uncharacterized protein LOC1  | not DE   | not DE   | not DE   | not DE  |
| EVM0003858 | LG8 | uncharacterized protein LOC1  | not DE   | not DE   | not DE   | not DE  |
| EVM0012424 | LG8 | uncharacterized protein LOC1  | not DE   | not DE   | not DE   | not DE  |
| EVM0011806 | LG8 | uncharacterized protein LOC1  | not DE   | not DE   | not DE   | not DE  |
| EVM0014369 | LG8 | uncharacterized protein LOC1  | not DE   | not DE   | 1.400501 | 0.00128 |
| EVM0012358 | LG8 | uncharacterized protein LOC1  | not DE   | not DE   | not DE   | not DE  |
| EVM0011324 | LG8 | uncharacterized protein LOC1  | not DE   | not DE   | not DE   | not DE  |
| EVM0016146 | LG8 | uracil-DNA glycosylase-like   | not DE   | not DE   | not DE   | not DE  |
| EVM0001319 | LG8 | urease-like isoform X1        | not DE   | not DE   | not DE   | not DE  |
| EVM0010527 | LG8 | uridine-cytidine kinase C-li  | not DE   | not DE   | not DE   | not DE  |
| EVM0008697 | LG8 | vacuolar amino acid transport | not DE   | not DE   | not DE   | not DE  |
| EVM0007865 | LG8 | very-long-chain 3-oxoacyl-Co  | not DE   | not DE   | not DE   | not DE  |
| EVM0010069 | LG8 | vesicle transport v-SNARE 12  | not DE   | not DE   | not DE   | not DE  |
| EVM0014442 | LG8 | vesicle transport v-SNARE 12  | not DE   | not DE   | not DE   | not DE  |
| EVM0014729 | LG8 | zinc finger A20 and AN1 doma  | not DE   | not DE   | not DE   | not DE  |
| EVM0008992 | LG8 | zinc finger CCCH domain-cont  | not DE   | not DE   | not DE   | not DE  |
| EVM0015829 | LG8 | zinc finger CCCH domain-cont  | not DE   | not DE   | not DE   | not DE  |
| EVM0015683 | LG8 | zinc finger protein 6-like    | not DE   | not DE   | not DE   | not DE  |
| EVM0019869 | LG8 | zinc finger protein 6-like    | not DE   | not DE   | not DE   | not DE  |
| EVM0010051 | LG8 | zinc finger protein CONSTANS  | not DE   | not DE   | -1.89394 | 0.0011  |
| EVM0006900 | LG8 | zinc finger protein MAGPIE i  | not DE   | not DE   | not DE   | not DE  |
| EVM0007997 | LG8 | zinc finger protein VAR3, ch  | not DE   | not DE   | not DE   | not DE  |
| EVM0016206 | LG8 | zinc finger protein VAR3, ch  | not DE   | not DE   | not DE   | not DE  |
| EVM0000844 | LG8 | zinc finger protein WIP2      | not DE   | not DE   | not DE   | not DE  |
| EVM0011365 | LG8 | 2-oxoglutarate and Fe(II)-dep | not DE   | not DE   | not DE   | not DE  |
| EVM0012892 | LG8 | 2-oxoglutarate and Fe(II)-dep | not DE   | not DE   | not DE   | not DE  |
| EVM0012104 | LG8 | 24-sterol C-methyltransferase | not DE   | not DE   | not DE   | not DE  |
| EVM0012847 | LG8 | 3-ketoacyl-CoA reductase 1    | not DE   | not DE   | not DE   | not DE  |
| EVM0010766 | LG8 | 3-ketoacyl-CoA synthase 6     | not DE   | not DE   | not DE   | not DE  |
| EVM0007113 | LG8 | 50S ribosomal protein L23, pa | not DE   | not DE   | not DE   | not DE  |
| EVM0013909 | LG8 | 50S ribosomal protein L32pA   | not DE   | not DE   | not DE   | not DE  |
| EVM0014476 | LG8 | 50S ribosomal protein L32pA   | not DE   | not DE   | not DE   | not DE  |
| EVM0020829 | LG8 | 51 kDa subunit of complex I   | not DE   | not DE   | not DE   | not DE  |
| EVM0014141 | LG8 | 6-phosphogluconate dehydrogen | not DE   | not DE   | not DE   | not DE  |
| EVM0007497 | LG8 | APETALA 1-1                   | not DE   | not DE   | not DE   | not DE  |
| EVM0006946 | LG8 | ATP binding protein, putative | not DE   | not DE   | not DE   | not DE  |
| EVM0020958 | LG8 | ATP binding protein, putative | not DE   | not DE   | not DE   | not DE  |
| EVM0024220 | LG8 | ATP binding protein, putative | not DE   | not DE   | not DE   | not DE  |
| EVM0023992 | LG8 | ATP citrate lyase b-subunit f | not DE   | not DE   | not DE   | not DE  |
| EVM0003900 | LG8 | ATP synthase beta subunit, pa | not DE   | not DE   | not DE   | not DE  |
| EVM0011175 | LG8 | ATP/ADP carrier protein, part | not DE   | not DE   | not DE   | not DE  |
| EVM0012821 | LG8 | ATP/ADP carrier protein, part | not DE   | not DE   | not DE   | not DE  |
| EVM0022195 | LG8 | Actin cross-linking protein,  | not DE   | not DE   | not DE   | not DE  |
| EVM0021944 | LG8 | Actin-related protein 7 isof  | not DE   | not DE   | not DE   | not DE  |
| EVM0004332 | LG8 | Ankyrin repeat family protein | not DE   | not DE   | not DE   | not DE  |
| EVM0012008 | LG8 | Ankyrin repeat family protein | not DE   | not DE   | not DE   | not DE  |
| EVM0014223 | LG8 | Annexin-like protein RJ4 isof | not DE   | not DE   | not DE   | not DE  |
| EVM0015449 | LG8 | Anthranilate synthase beta su | not DE   | not DE   | not DE   | not DE  |
| EVM0003997 | LG8 | Appr-1-p processing enzyme fa | not DE   | not DE   | not DE   | not DE  |
| EVM0021700 | LG8 | Argonaute family protein      | not DE   | not DE   | not DE   | not DE  |

|            |     |                                |          |          |          |         |
|------------|-----|--------------------------------|----------|----------|----------|---------|
| EVM0002810 | LG8 | Aspartic proteinase nepenthes  | not DE   | not DE   | not DE   | not DE  |
| EVM0016369 | LG8 | Aspartic proteinase nepenthes  | not DE   | not DE   | not DE   | not DE  |
| EVM0012691 | LG8 | BED zinc finger, HAT family di | not DE   | not DE   | not DE   | not DE  |
| EVM0011463 | LG8 | BZIP transcription factor fam  | not DE   | not DE   | not DE   | not DE  |
| EVM0023955 | LG8 | BnaA06g19350D                  | -2.58792 | 0.005469 | not DE   | not DE  |
| EVM0008935 | LG8 | BnaC07g22450D                  | not DE   | not DE   | not DE   | not DE  |
| EVM0006278 | LG8 | CCCH-type zinc finger protein  | -1.34574 | 0.026901 | -1.65839 | #####   |
| EVM0011425 | LG8 | CHASE domain containing histi  | not DE   | not DE   | not DE   | not DE  |
| EVM0007703 | LG8 | CONSTANS-LIKE 10               | 1.937981 | 0.029295 | not DE   | not DE  |
| EVM0023649 | LG8 | CTL-like protein               | not DE   | not DE   | not DE   | not DE  |
| EVM0016009 | LG8 | Ca4CL6                         | not DE   | not DE   | not DE   | not DE  |
| EVM0024566 | LG8 | Caffeic acid 3-O-methyltransf  | not DE   | not DE   | not DE   | not DE  |
| EVM0006697 | LG8 | Calcium-dependent lipid-bindin | not DE   | not DE   | 1.217897 | 0.03698 |
| EVM0011832 | LG8 | Clavata3/esr-related 43, puta  | not DE   | not DE   | not DE   | not DE  |
| EVM0012631 | LG8 | Cleavage and polyadenylation   | not DE   | not DE   | not DE   | not DE  |
| EVM0012473 | LG8 | Cyclophilin-like peptidyl-pro  | not DE   | not DE   | not DE   | not DE  |
| EVM0014753 | LG8 | Cysteine proteinases superfam  | not DE   | not DE   | not DE   | not DE  |
| EVM0020393 | LG8 | Cysteine-rich repeat secretor  | not DE   | not DE   | not DE   | not DE  |
| EVM0011676 | LG8 | Cytochrome P450 protein        | not DE   | not DE   | not DE   | not DE  |
| EVM0021338 | LG8 | Cytochrome P450 protein        | not DE   | not DE   | not DE   | not DE  |
| EVM0005866 | LG8 | Cytochrome P450, family 86, s  | not DE   | not DE   | not DE   | not DE  |
| EVM0011052 | LG8 | DEAD/DEAH box RNA helicase fa  | not DE   | not DE   | not DE   | not DE  |
| EVM0022172 | LG8 | DNA-binding storekeeper prote  | not DE   | not DE   | not DE   | not DE  |
| EVM0001884 | LG8 | DNA-damage-inducible protein   | not DE   | not DE   | not DE   | not DE  |
| EVM0015515 | LG8 | DNAJ heat shock family protei  | not DE   | not DE   | not DE   | not DE  |
| EVM0024151 | LG8 | DORNROSCHEN-like, putative     | not DE   | not DE   | not DE   | not DE  |
| EVM0008750 | LG8 | Disease resistance family pro  | not DE   | not DE   | not DE   | not DE  |
| EVM0017949 | LG8 | Disease resistance family pro  | not DE   | not DE   | not DE   | not DE  |
| EVM0023152 | LG8 | EXS (ERD1/XPR1/SYG1) family p  | not DE   | not DE   | not DE   | not DE  |
| EVM0006759 | LG8 | Early-responsive to dehydrati  | not DE   | not DE   | not DE   | not DE  |
| EVM0007861 | LG8 | Early-responsive to dehydrati  | not DE   | not DE   | not DE   | not DE  |
| EVM0014309 | LG8 | Encodes a protein whose expres | not DE   | not DE   | not DE   | not DE  |
| EVM0015975 | LG8 | Endonuclease 2, 2 isoform 1    | not DE   | not DE   | not DE   | not DE  |
| EVM0005354 | LG8 | Expansin-A8 -like protein      | not DE   | not DE   | not DE   | not DE  |
| EVM0018565 | LG8 | F-box family protein           | not DE   | not DE   | not DE   | not DE  |
| EVM0019032 | LG8 | F-box/RNI-like superfamily pr  | not DE   | not DE   | not DE   | not DE  |
| EVM0004058 | LG8 | FKBP-type peptidyl-prolyl cis  | not DE   | not DE   | not DE   | not DE  |
| EVM0018533 | LG8 | Flavonol synthase/flavanone 3  | not DE   | not DE   | not DE   | not DE  |
| EVM0015519 | LG8 | G patch domain-containing 8    | not DE   | not DE   | not DE   | not DE  |
| EVM0014319 | LG8 | GDSL esterase/lipase           | not DE   | not DE   | not DE   | not DE  |
| EVM0001025 | LG8 | Glutamate decarboxylase 4 iso  | not DE   | not DE   | not DE   | not DE  |
| EVM0010314 | LG8 | Glycosyl hydrolase 9B1 isoform | not DE   | not DE   | not DE   | not DE  |
| EVM0012852 | LG8 | Glycosyl hydrolases family 32  | not DE   | not DE   | not DE   | not DE  |
| EVM0009505 | LG8 | High affinity nitrate transpor | not DE   | not DE   | not DE   | not DE  |
| EVM0010237 | LG8 | Homeobox-leucine zipper prote  | not DE   | not DE   | not DE   | not DE  |
| EVM0012437 | LG8 | Hydroxyproline-rich glycoprot  | not DE   | not DE   | not DE   | not DE  |
| EVM0012134 | LG8 | Indeterminate (ID)-domain 5, p | not DE   | not DE   | not DE   | not DE  |
| EVM0014879 | LG8 | Integrase-type DNA-binding su  | not DE   | not DE   | not DE   | not DE  |
| EVM0008083 | LG8 | KNOTTED1-like homeobox gene 6  | not DE   | not DE   | not DE   | not DE  |
| EVM0008703 | LG8 | Kinase 2B isoform 1            | not DE   | not DE   | not DE   | not DE  |
| EVM0015002 | LG8 | Kinase superfamily protein     | not DE   | not DE   | not DE   | not DE  |
| EVM0011558 | LG8 | LRR and NB-ARC domains-contain | not DE   | not DE   | not DE   | not DE  |
| EVM0022031 | LG8 | LRR and NB-ARC domains-contain | not DE   | not DE   | not DE   | not DE  |
| EVM0012354 | LG8 | LRR receptor-like serine/thre  | not DE   | not DE   | not DE   | not DE  |

|            |     |                                        |          |          |         |         |
|------------|-----|----------------------------------------|----------|----------|---------|---------|
| EVM0000064 | LG8 | MADS box transcription factor          | not DE   | not DE   | not DE  | not DE  |
| EVM0023727 | LG8 | MADS-box protein AGL15                 | not DE   | not DE   | not DE  | not DE  |
| EVM0006004 | LG8 | MAP kinase kinase 7                    | not DE   | not DE   | not DE  | not DE  |
| EVM0001847 | LG8 | Major latex protein, putative          | not DE   | not DE   | not DE  | not DE  |
| EVM0003720 | LG8 | Major latex protein, putative          | not DE   | not DE   | not DE  | not DE  |
| EVM0003823 | LG8 | Major latex protein, putative          | not DE   | not DE   | not DE  | not DE  |
| EVM0006231 | LG8 | Major latex protein, putative          | not DE   | not DE   | not DE  | not DE  |
| EVM0008543 | LG8 | Major latex protein, putative          | not DE   | not DE   | not DE  | not DE  |
| EVM0010382 | LG8 | Major latex protein, putative          | not DE   | not DE   | not DE  | not DE  |
| EVM0017401 | LG8 | Major latex protein, putative          | not DE   | not DE   | not DE  | not DE  |
| EVM0019565 | LG8 | Major latex protein, putative          | not DE   | not DE   | not DE  | not DE  |
| EVM0006423 | LG8 | Mediator of RNA polymerase II          | not DE   | not DE   | not DE  | not DE  |
| EVM0001832 | LG8 | Membrane lipoprotein, putative         | 3.822728 | 0.038347 | not DE  | not DE  |
| EVM0007207 | LG8 | Metalloendoproteinase 1 precursor      | not DE   | not DE   | not DE  | not DE  |
| EVM0003496 | LG8 | Mucin-related protein                  | not DE   | not DE   | not DE  | not DE  |
| EVM0003200 | LG8 | Myb domain protein 106, putative       | not DE   | not DE   | not DE  | not DE  |
| EVM0009317 | LG8 | Myb domain protein 106, putative       | not DE   | not DE   | not DE  | not DE  |
| EVM0019701 | LG8 | NAD(P)-binding Rossmann-fold           | not DE   | not DE   | not DE  | not DE  |
| EVM0023111 | LG8 | NAD(P)-linked oxidoreductase           | not DE   | not DE   | not DE  | not DE  |
| EVM0022274 | LG8 | NADH-ubiquinone oxidoreductase         | not DE   | not DE   | not DE  | not DE  |
| EVM0020596 | LG8 | NdhE, partial (chloroplast)            | -2.32172 | 0.000329 | not DE  | not DE  |
| EVM0008985 | LG8 | Nitrate transporter 1.7, putative      | not DE   | not DE   | not DE  | not DE  |
| EVM0010770 | LG8 | Nsp-interacting kinase 3 isoform       | -1.3681  | 0.028718 | not DE  | not DE  |
| EVM0022477 | LG8 | Nucleic acid-binding, OB-fold          | not DE   | not DE   | not DE  | not DE  |
| EVM0015549 | LG8 | Nucleolin like 2 isoform 2             | 1.088254 | 0.000742 | not DE  | not DE  |
| EVM0019999 | LG8 | Nudix hydrolase                        | not DE   | not DE   | not DE  | not DE  |
| EVM0016115 | LG8 | O-fucosyltransferase family protein    | not DE   | not DE   | not DE  | not DE  |
| EVM0016529 | LG8 | OSBP(oxysterol binding protein)        | not DE   | not DE   | not DE  | not DE  |
| EVM0013921 | LG8 | Octicosapeptide/Phox/Bemlp family      | not DE   | not DE   | not DE  | not DE  |
| EVM0024155 | LG8 | P-loop containing nucleoside           | not DE   | not DE   | not DE  | not DE  |
| EVM0022632 | LG8 | PLAC8 family protein, putative         | not DE   | not DE   | not DE  | not DE  |
| EVM0024526 | LG8 | PLATZ transcription factor family      | not DE   | not DE   | not DE  | not DE  |
| EVM0016509 | LG8 | Pantothenate kinase 2                  | not DE   | not DE   | not DE  | not DE  |
| EVM0013528 | LG8 | Pectate lyase family protein, putative | not DE   | not DE   | not DE  | not DE  |
| EVM0017049 | LG8 | Pentatricopeptide repeat (PPR)         | 1.634909 | 1.55E-06 | not DE  | not DE  |
| EVM0022496 | LG8 | Pentatricopeptide repeat superfamily   | not DE   | not DE   | not DE  | not DE  |
| EVM0007802 | LG8 | Peptidoglycan-binding LysM domain      | not DE   | not DE   | not DE  | not DE  |
| EVM0005525 | LG8 | Peptidyl-prolyl cis-trans isomerase    | not DE   | not DE   | not DE  | not DE  |
| EVM0000981 | LG8 | Phosphate transporter PHO1-like        | not DE   | not DE   | not DE  | not DE  |
| EVM0011188 | LG8 | Phosphatidyl serine synthase           | not DE   | not DE   | not DE  | not DE  |
| EVM0000738 | LG8 | Phosphoenolpyruvate carboxylase        | not DE   | not DE   | not DE  | not DE  |
| EVM0021919 | LG8 | Pollen Ole e 1 allergen and related    | not DE   | not DE   | not DE  | not DE  |
| EVM0005473 | LG8 | Protein FAM69A                         | not DE   | not DE   | not DE  | not DE  |
| EVM0015687 | LG8 | Protein PPLZ12, putative               | not DE   | not DE   | not DE  | not DE  |
| EVM0021654 | LG8 | PsbQ-like 2                            | not DE   | not DE   | not DE  | not DE  |
| EVM0021443 | LG8 | Purple acid phosphatase 17             | not DE   | not DE   | not DE  | not DE  |
| EVM0016431 | LG8 | Purple acid phosphatase 27 isoform     | not DE   | not DE   | not DE  | not DE  |
| EVM0023210 | LG8 | Purple acid phosphatase 3 isoform      | not DE   | not DE   | not DE  | not DE  |
| EVM0010232 | LG8 | Pyruvate dehydrogenase complex         | not DE   | not DE   | not DE  | not DE  |
| EVM0012681 | LG8 | RING finger protein, putative          | not DE   | not DE   | not DE  | not DE  |
| EVM0015803 | LG8 | RING/U-box superfamily protein         | not DE   | not DE   | not DE  | not DE  |
| EVM0019744 | LG8 | RING/U-box superfamily protein         | not DE   | not DE   | not DE  | not DE  |
| EVM0013249 | LG8 | RNA polymerases N / 8 kDa subunit      | not DE   | not DE   | 1.82584 | 0.00029 |
| EVM0019831 | LG8 | RNA-binding CRS1 / YhbY (CRM)          | not DE   | not DE   | not DE  | not DE  |

|            |     |                               |          |          |          |         |
|------------|-----|-------------------------------|----------|----------|----------|---------|
| EVM0015161 | LG8 | RNA/RNP complex-1-interacting | not DE   | not DE   | not DE   | not DE  |
| EVM0004666 | LG8 | Ran BP2/NZF zinc finger-like  | not DE   | not DE   | not DE   | not DE  |
| EVM0015816 | LG8 | Ran BP2/NZF zinc finger-like  | not DE   | not DE   | not DE   | not DE  |
| EVM0023019 | LG8 | Remorin family protein        | not DE   | not DE   | not DE   | not DE  |
| EVM0002104 | LG8 | Ribosomal protein L12/ ATP-de | not DE   | not DE   | not DE   | not DE  |
| EVM0017818 | LG8 | Rubisco methyltransferase fam | not DE   | not DE   | not DE   | not DE  |
| EVM0023265 | LG8 | Rubisco methyltransferase fam | not DE   | not DE   | not DE   | not DE  |
| EVM0014677 | LG8 | S-locus lectin protein kinase | not DE   | not DE   | not DE   | not DE  |
| EVM0017765 | LG8 | SCP1-like small phosphatase 5 | 1.104562 | 0.027643 | not DE   | not DE  |
| EVM0009669 | LG8 | Son of sevenless              | not DE   | not DE   | not DE   | not DE  |
| EVM0010809 | LG8 | TATA-box-binding              | not DE   | not DE   | not DE   | not DE  |
| EVM0006657 | LG8 | TCP family transcription fact | not DE   | not DE   | not DE   | not DE  |
| EVM0012032 | LG8 | TCP-1/cpn60 chaperonin family | not DE   | not DE   | not DE   | not DE  |
| EVM0019465 | LG8 | Thylakoid lumenal 19 kDa prot | not DE   | not DE   | not DE   | not DE  |
| EVM0018510 | LG8 | Transcription factor bHLH30   | not DE   | not DE   | not DE   | not DE  |
| EVM0001897 | LG8 | Transcription factor protein  | not DE   | not DE   | not DE   | not DE  |
| EVM0013864 | LG8 | Transmembrane Fragile-X-F-ass | not DE   | not DE   | not DE   | not DE  |
| EVM0021040 | LG8 | UDP-3-O-acyl N-acetylglycosam | not DE   | not DE   | not DE   | not DE  |
| EVM0007950 | LG8 | UDP-galactose transporter 3 i | -2.3142  | 0.002298 | -1.66266 | 0.00948 |
| EVM0006756 | LG8 | Uncharacterized protein TCM_C | not DE   | not DE   | not DE   | not DE  |
| EVM0002466 | LG8 | Uncharacterized protein TCM_C | not DE   | not DE   | not DE   | not DE  |
| EVM0015566 | LG8 | Uncharacterized protein TCM_C | not DE   | not DE   | not DE   | not DE  |
| EVM0020327 | LG8 | Uncharacterized protein TCM_C | not DE   | not DE   | not DE   | not DE  |
| EVM0007604 | LG8 | Uncharacterized protein TCM_C | not DE   | not DE   | not DE   | not DE  |
| EVM0018235 | LG8 | Uncharacterized protein TCM_C | not DE   | not DE   | not DE   | not DE  |
| EVM0001552 | LG8 | Uncharacterized protein TCM_C | not DE   | not DE   | not DE   | not DE  |
| EVM0017092 | LG8 | Uncharacterized protein TCM_C | not DE   | not DE   | not DE   | not DE  |
| EVM0008813 | LG8 | Uncharacterized protein TCM_C | not DE   | not DE   | not DE   | not DE  |
| EVM0022656 | LG8 | Uncharacterized protein TCM_C | not DE   | not DE   | not DE   | not DE  |
| EVM0009013 | LG8 | Uncharacterized protein TCM_C | not DE   | not DE   | not DE   | not DE  |
| EVM0009894 | LG8 | Uncharacterized protein TCM_C | not DE   | not DE   | 2.110372 | 0.00067 |
| EVM0001214 | LG8 | Uncharacterized protein TCM_C | not DE   | not DE   | not DE   | not DE  |
| EVM0006640 | LG8 | Uncharacterized protein isofc | not DE   | not DE   | not DE   | not DE  |
| EVM0006879 | LG8 | Uncharacterized protein isofc | not DE   | not DE   | not DE   | not DE  |
| EVM0009567 | LG8 | Uncharacterized protein isofc | not DE   | not DE   | not DE   | not DE  |
| EVM0024286 | LG8 | Uncharacterized protein isofc | not DE   | not DE   | not DE   | not DE  |
| EVM0017404 | LG8 | WIN1-like protein, putative   | not DE   | not DE   | not DE   | not DE  |
| EVM0004255 | LG8 | WRKY DNA-binding protein 57 i | not DE   | not DE   | not DE   | not DE  |
| EVM0020089 | LG8 | WRKY transcription factor 2-4 | 1.247018 | 0.017596 | not DE   | not DE  |
| EVM0009211 | LG8 | Yorkie                        | not DE   | not DE   | not DE   | not DE  |
| EVM0000110 | LG8 | Zinc finger protein           | not DE   | not DE   | not DE   | not DE  |
| EVM0000443 | LG8 | Zinc finger-like protein      | not DE   | not DE   | not DE   | not DE  |
| EVM0024325 | LG8 | [Protein-PII] uridylyltransfe | not DE   | not DE   | not DE   | not DE  |
| EVM0015463 | LG8 | alcohol dehydrogenase family  | not DE   | not DE   | not DE   | not DE  |
| EVM0005569 | LG8 | aspartyl protease family prot | not DE   | not DE   | not DE   | not DE  |
| EVM0020667 | LG8 | auxin:hydrogen symporter, put | not DE   | not DE   | not DE   | not DE  |
| EVM0009907 | LG8 | bZIP family protein           | not DE   | not DE   | not DE   | not DE  |
| EVM0018163 | LG8 | beta-glucosidase              | not DE   | not DE   | not DE   | not DE  |
| EVM0024450 | LG8 | beta-ketoacyl-ACP reductase   | not DE   | not DE   | not DE   | not DE  |
| EVM0020200 | LG8 | carboxy-lyase, putative       | not DE   | not DE   | not DE   | not DE  |
| EVM0012927 | LG8 | chloroplast iron superoxide d | not DE   | not DE   | not DE   | not DE  |
| EVM0006530 | LG8 | cinnamyl-alcohol dehydrogenas | not DE   | not DE   | not DE   | not DE  |
| EVM0002841 | LG8 | circadian clock-associated FK | 4.067137 | 0.000145 | not DE   | not DE  |
| EVM0004744 | LG8 | clathrin assembly family prot | not DE   | not DE   | not DE   | not DE  |

|            |     |                               |          |          |          |         |
|------------|-----|-------------------------------|----------|----------|----------|---------|
| EVM0017017 | LG8 | clavata3/esr-related 12 famil | not DE   | not DE   | not DE   | not DE  |
| EVM0003974 | LG8 | conserved hypothetical protei | not DE   | not DE   | not DE   | not DE  |
| EVM0005107 | LG8 | conserved hypothetical protei | not DE   | not DE   | not DE   | not DE  |
| EVM0006475 | LG8 | conserved hypothetical protei | not DE   | not DE   | not DE   | not DE  |
| EVM0009014 | LG8 | conserved hypothetical protei | not DE   | not DE   | not DE   | not DE  |
| EVM0012544 | LG8 | conserved hypothetical protei | not DE   | not DE   | 1.721768 | 0.00415 |
| EVM0015639 | LG8 | conserved hypothetical protei | not DE   | not DE   | not DE   | not DE  |
| EVM0017219 | LG8 | conserved hypothetical protei | not DE   | not DE   | not DE   | not DE  |
| EVM0024587 | LG8 | conserved hypothetical protei | not DE   | not DE   | not DE   | not DE  |
| EVM0011415 | LG8 | cytochrome f (chloroplast)    | -1.69196 | 0.019382 | not DE   | not DE  |
| EVM0023514 | LG8 | defender against cell death,  | not DE   | not DE   | not DE   | not DE  |
| EVM0019339 | LG8 | defensin protein 1            | not DE   | not DE   | not DE   | not DE  |
| EVM0013450 | LG8 | enone oxidoreductase          | not DE   | not DE   | not DE   | not DE  |
| EVM0015799 | LG8 | flowering locus C             | not DE   | not DE   | not DE   | not DE  |
| EVM0014701 | LG8 | glyceraldehyde-3-phosphate de | not DE   | not DE   | not DE   | not DE  |
| EVM0015405 | LG8 | glycerol-3-phosphate dehydrog | not DE   | not DE   | not DE   | not DE  |
| EVM0006815 | LG8 | hypothetical protein          | not DE   | not DE   | not DE   | not DE  |
| EVM0000568 | LG8 | hypothetical protein AMTR_s03 | not DE   | not DE   | not DE   | not DE  |
| EVM0014976 | LG8 | hypothetical protein AMTR_s05 | not DE   | not DE   | not DE   | not DE  |
| EVM0002014 | LG8 | hypothetical protein ARALYDRA | not DE   | not DE   | not DE   | not DE  |
| EVM0016460 | LG8 | hypothetical protein CARUB_vl | not DE   | not DE   | not DE   | not DE  |
| EVM0000401 | LG8 | hypothetical protein CICLE_vl | not DE   | not DE   | not DE   | not DE  |
| EVM0012628 | LG8 | hypothetical protein CICLE_vl | not DE   | not DE   | not DE   | not DE  |
| EVM0017664 | LG8 | hypothetical protein CICLE_vl | not DE   | not DE   | not DE   | not DE  |
| EVM0012228 | LG8 | hypothetical protein CICLE_vl | not DE   | not DE   | not DE   | not DE  |
| EVM0017085 | LG8 | hypothetical protein CICLE_vl | not DE   | not DE   | not DE   | not DE  |
| EVM0016835 | LG8 | hypothetical protein CICLE_vl | not DE   | not DE   | not DE   | not DE  |
| EVM0000362 | LG8 | hypothetical protein CICLE_vl | not DE   | not DE   | not DE   | not DE  |
| EVM0013048 | LG8 | hypothetical protein CICLE_vl | not DE   | not DE   | not DE   | not DE  |
| EVM0000224 | LG8 | hypothetical protein CICLE_vl | not DE   | not DE   | not DE   | not DE  |
| EVM0018045 | LG8 | hypothetical protein CICLE_vl | not DE   | not DE   | not DE   | not DE  |
| EVM0021968 | LG8 | hypothetical protein CICLE_vl | not DE   | not DE   | -1.62745 | #####   |
| EVM0020448 | LG8 | hypothetical protein CICLE_vl | not DE   | not DE   | not DE   | not DE  |
| EVM0014760 | LG8 | hypothetical protein CICLE_vl | not DE   | not DE   | not DE   | not DE  |
| EVM0018177 | LG8 | hypothetical protein CICLE_vl | not DE   | not DE   | not DE   | not DE  |
| EVM0021976 | LG8 | hypothetical protein CICLE_vl | 1.286402 | 0.005749 | not DE   | not DE  |
| EVM0007930 | LG8 | hypothetical protein CICLE_vl | not DE   | not DE   | not DE   | not DE  |
| EVM0011723 | LG8 | hypothetical protein CICLE_vl | not DE   | not DE   | not DE   | not DE  |
| EVM0008481 | LG8 | hypothetical protein CICLE_vl | not DE   | not DE   | not DE   | not DE  |
| EVM0021272 | LG8 | hypothetical protein CICLE_vl | not DE   | not DE   | not DE   | not DE  |
| EVM0000835 | LG8 | hypothetical protein CICLE_vl | not DE   | not DE   | not DE   | not DE  |
| EVM0019444 | LG8 | hypothetical protein CICLE_vl | not DE   | not DE   | not DE   | not DE  |
| EVM0008426 | LG8 | hypothetical protein CICLE_vl | not DE   | not DE   | not DE   | not DE  |
| EVM0012260 | LG8 | hypothetical protein CICLE_vl | not DE   | not DE   | not DE   | not DE  |
| EVM0023716 | LG8 | hypothetical protein CICLE_vl | not DE   | not DE   | not DE   | not DE  |
| EVM0007258 | LG8 | hypothetical protein CICLE_vl | not DE   | not DE   | not DE   | not DE  |
| EVM0023870 | LG8 | hypothetical protein CICLE_vl | not DE   | not DE   | not DE   | not DE  |
| EVM0008659 | LG8 | hypothetical protein CICLE_vl | not DE   | not DE   | not DE   | not DE  |
| EVM0014336 | LG8 | hypothetical protein CICLE_vl | 1.095529 | 0.000928 | not DE   | not DE  |
| EVM0002899 | LG8 | hypothetical protein CICLE_vl | not DE   | not DE   | not DE   | not DE  |
| EVM0013371 | LG8 | hypothetical protein CICLE_vl | not DE   | not DE   | -1.83026 | 0.01685 |
| EVM0016724 | LG8 | hypothetical protein CICLE_vl | not DE   | not DE   | 1.786344 | 0.02998 |
| EVM0003867 | LG8 | hypothetical protein CICLE_vl | not DE   | not DE   | not DE   | not DE  |
| EVM0014285 | LG8 | hypothetical protein CICLE_vl | -2.8716  | 3.17E-05 | not DE   | not DE  |



|            |     |                               |          |          |          |         |
|------------|-----|-------------------------------|----------|----------|----------|---------|
| EVM0019473 | LG8 | hypothetical protein CICLE_v1 | not DE   | not DE   | not DE   | not DE  |
| EVM0004857 | LG8 | hypothetical protein CICLE_v1 | -1.42649 | 0.018727 | not DE   | not DE  |
| EVM0011711 | LG8 | hypothetical protein CICLE_v1 | not DE   | not DE   | not DE   | not DE  |
| EVM0011518 | LG8 | hypothetical protein CICLE_v1 | not DE   | not DE   | not DE   | not DE  |
| EVM0008650 | LG8 | hypothetical protein CICLE_v1 | not DE   | not DE   | not DE   | not DE  |
| EVM0009410 | LG8 | hypothetical protein CICLE_v1 | not DE   | not DE   | not DE   | not DE  |
| EVM0005205 | LG8 | hypothetical protein CICLE_v1 | not DE   | not DE   | not DE   | not DE  |
| EVM0001155 | LG8 | hypothetical protein CICLE_v1 | not DE   | not DE   | not DE   | not DE  |
| EVM0000438 | LG8 | hypothetical protein CICLE_v1 | not DE   | not DE   | not DE   | not DE  |
| EVM0019033 | LG8 | hypothetical protein CICLE_v1 | not DE   | not DE   | not DE   | not DE  |
| EVM0020888 | LG8 | hypothetical protein CICLE_v1 | not DE   | not DE   | not DE   | not DE  |
| EVM0000957 | LG8 | hypothetical protein CICLE_v1 | not DE   | not DE   | not DE   | not DE  |
| EVM0021839 | LG8 | hypothetical protein CICLE_v1 | not DE   | not DE   | not DE   | not DE  |
| EVM0001594 | LG8 | hypothetical protein CICLE_v1 | not DE   | not DE   | not DE   | not DE  |
| EVM0002773 | LG8 | hypothetical protein CICLE_v1 | not DE   | not DE   | not DE   | not DE  |
| EVM0009656 | LG8 | hypothetical protein CICLE_v1 | not DE   | not DE   | not DE   | not DE  |
| EVM0009904 | LG8 | hypothetical protein CICLE_v1 | not DE   | not DE   | not DE   | not DE  |
| EVM0010658 | LG8 | hypothetical protein CICLE_v1 | not DE   | not DE   | not DE   | not DE  |
| EVM0013868 | LG8 | hypothetical protein CICLE_v1 | not DE   | not DE   | not DE   | not DE  |
| EVM0019098 | LG8 | hypothetical protein CICLE_v1 | not DE   | not DE   | not DE   | not DE  |
| EVM0024386 | LG8 | hypothetical protein CICLE_v1 | not DE   | not DE   | not DE   | not DE  |
| EVM0024611 | LG8 | hypothetical protein CICLE_v1 | not DE   | not DE   | not DE   | not DE  |
| EVM0022042 | LG8 | hypothetical protein CICLE_v1 | not DE   | not DE   | not DE   | not DE  |
| EVM0000345 | LG8 | hypothetical protein CICLE_v1 | not DE   | not DE   | not DE   | not DE  |
| EVM0015672 | LG8 | hypothetical protein CICLE_v1 | not DE   | not DE   | not DE   | not DE  |
| EVM0001940 | LG8 | hypothetical protein CICLE_v1 | not DE   | not DE   | not DE   | not DE  |
| EVM0011491 | LG8 | hypothetical protein CICLE_v1 | not DE   | not DE   | not DE   | not DE  |
| EVM0012831 | LG8 | hypothetical protein CICLE_v1 | not DE   | not DE   | not DE   | not DE  |
| EVM0024128 | LG8 | hypothetical protein CICLE_v1 | not DE   | not DE   | not DE   | not DE  |
| EVM0005973 | LG8 | hypothetical protein CICLE_v1 | 1.066313 | 0.000952 | not DE   | not DE  |
| EVM0019714 | LG8 | hypothetical protein CICLE_v1 | not DE   | not DE   | not DE   | not DE  |
| EVM0004568 | LG8 | hypothetical protein CICLE_v1 | not DE   | not DE   | not DE   | not DE  |
| EVM0024178 | LG8 | hypothetical protein CICLE_v1 | not DE   | not DE   | not DE   | not DE  |
| EVM0020755 | LG8 | hypothetical protein CICLE_v1 | not DE   | not DE   | not DE   | not DE  |
| EVM0018469 | LG8 | hypothetical protein CICLE_v1 | not DE   | not DE   | not DE   | not DE  |
| EVM0010904 | LG8 | hypothetical protein CICLE_v1 | -1.50809 | 0.0489   | not DE   | not DE  |
| EVM0013417 | LG8 | hypothetical protein CICLE_v1 | not DE   | not DE   | not DE   | not DE  |
| EVM0020929 | LG8 | hypothetical protein CICLE_v1 | not DE   | not DE   | not DE   | not DE  |
| EVM0021629 | LG8 | hypothetical protein CICLE_v1 | not DE   | not DE   | not DE   | not DE  |
| EVM0022811 | LG8 | hypothetical protein CICLE_v1 | not DE   | not DE   | not DE   | not DE  |
| EVM0008408 | LG8 | hypothetical protein CICLE_v1 | not DE   | not DE   | not DE   | not DE  |
| EVM0019157 | LG8 | hypothetical protein CICLE_v1 | not DE   | not DE   | not DE   | not DE  |
| EVM0018505 | LG8 | hypothetical protein CICLE_v1 | not DE   | not DE   | not DE   | not DE  |
| EVM0021892 | LG8 | hypothetical protein CICLE_v1 | not DE   | not DE   | not DE   | not DE  |
| EVM0008448 | LG8 | hypothetical protein CICLE_v1 | -2.25465 | 0.00876  | not DE   | not DE  |
| EVM0005454 | LG8 | hypothetical protein CICLE_v1 | 1.795949 | 0.049534 | not DE   | not DE  |
| EVM0020768 | LG8 | hypothetical protein CICLE_v1 | not DE   | not DE   | not DE   | not DE  |
| EVM0023719 | LG8 | hypothetical protein CICLE_v1 | not DE   | not DE   | not DE   | not DE  |
| EVM0005649 | LG8 | hypothetical protein CICLE_v1 | 1.3408   | 0.020147 | 1.462891 | 0.00269 |
| EVM0002117 | LG8 | hypothetical protein CICLE_v1 | not DE   | not DE   | not DE   | not DE  |
| EVM0010549 | LG8 | hypothetical protein CICLE_v1 | not DE   | not DE   | not DE   | not DE  |
| EVM0011671 | LG8 | hypothetical protein CICLE_v1 | not DE   | not DE   | 1.899447 | #####   |
| EVM0006862 | LG8 | hypothetical protein CICLE_v1 | not DE   | not DE   | not DE   | not DE  |
| EVM0011367 | LG8 | hypothetical protein CICLE_v1 | not DE   | not DE   | not DE   | not DE  |

|            |     |                               |          |          |          |         |
|------------|-----|-------------------------------|----------|----------|----------|---------|
| EVM0006316 | LG8 | hypothetical protein CICLE_v1 | not DE   | not DE   | not DE   | not DE  |
| EVM0003999 | LG8 | hypothetical protein CICLE_v1 | not DE   | not DE   | not DE   | not DE  |
| EVM0021962 | LG8 | hypothetical protein CICLE_v1 | not DE   | not DE   | not DE   | not DE  |
| EVM0022465 | LG8 | hypothetical protein CICLE_v1 | not DE   | not DE   | 2.377936 | 0.00573 |
| EVM0018556 | LG8 | hypothetical protein CICLE_v1 | not DE   | not DE   | not DE   | not DE  |
| EVM0021861 | LG8 | hypothetical protein CICLE_v1 | not DE   | not DE   | 2.325693 | 0.00369 |
| EVM0019504 | LG8 | hypothetical protein CICLE_v1 | not DE   | not DE   | not DE   | not DE  |
| EVM0018730 | LG8 | hypothetical protein CICLE_v1 | not DE   | not DE   | not DE   | not DE  |
| EVM0000558 | LG8 | hypothetical protein CICLE_v1 | not DE   | not DE   | not DE   | not DE  |
| EVM0005511 | LG8 | hypothetical protein CICLE_v1 | not DE   | not DE   | not DE   | not DE  |
| EVM0018774 | LG8 | hypothetical protein CICLE_v1 | not DE   | not DE   | not DE   | not DE  |
| EVM0007619 | LG8 | hypothetical protein CICLE_v1 | not DE   | not DE   | not DE   | not DE  |
| EVM0020022 | LG8 | hypothetical protein CICLE_v1 | not DE   | not DE   | not DE   | not DE  |
| EVM0002604 | LG8 | hypothetical protein CICLE_v1 | not DE   | not DE   | not DE   | not DE  |
| EVM0004600 | LG8 | hypothetical protein CICLE_v1 | 2.911318 | 1.06E-05 | not DE   | not DE  |
| EVM0006669 | LG8 | hypothetical protein CICLE_v1 | not DE   | not DE   | not DE   | not DE  |
| EVM0024313 | LG8 | hypothetical protein CICLE_v1 | not DE   | not DE   | not DE   | not DE  |
| EVM0003500 | LG8 | hypothetical protein CICLE_v1 | not DE   | not DE   | not DE   | not DE  |
| EVM0023358 | LG8 | hypothetical protein CICLE_v1 | not DE   | not DE   | not DE   | not DE  |
| EVM0012861 | LG8 | hypothetical protein CICLE_v1 | not DE   | not DE   | not DE   | not DE  |
| EVM0009333 | LG8 | hypothetical protein CICLE_v1 | not DE   | not DE   | not DE   | not DE  |
| EVM0018673 | LG8 | hypothetical protein CICLE_v1 | not DE   | not DE   | not DE   | not DE  |
| EVM0004429 | LG8 | hypothetical protein CICLE_v1 | not DE   | not DE   | not DE   | not DE  |
| EVM0012024 | LG8 | hypothetical protein CICLE_v1 | not DE   | not DE   | not DE   | not DE  |
| EVM0023439 | LG8 | hypothetical protein CICLE_v1 | not DE   | not DE   | -1.00335 | 0.03109 |
| EVM0019683 | LG8 | hypothetical protein CICLE_v1 | not DE   | not DE   | not DE   | not DE  |
| EVM0023880 | LG8 | hypothetical protein CICLE_v1 | not DE   | not DE   | not DE   | not DE  |
| EVM0023737 | LG8 | hypothetical protein CICLE_v1 | not DE   | not DE   | not DE   | not DE  |
| EVM0011246 | LG8 | hypothetical protein CICLE_v1 | not DE   | not DE   | not DE   | not DE  |
| EVM0002294 | LG8 | hypothetical protein CICLE_v1 | not DE   | not DE   | not DE   | not DE  |
| EVM0023572 | LG8 | hypothetical protein CICLE_v1 | not DE   | not DE   | not DE   | not DE  |
| EVM0018896 | LG8 | hypothetical protein CICLE_v1 | 1.142588 | 0.044589 | not DE   | not DE  |
| EVM0002759 | LG8 | hypothetical protein CICLE_v1 | not DE   | not DE   | not DE   | not DE  |
| EVM0013253 | LG8 | hypothetical protein CICLE_v1 | not DE   | not DE   | not DE   | not DE  |
| EVM0018148 | LG8 | hypothetical protein CICLE_v1 | not DE   | not DE   | not DE   | not DE  |
| EVM0018822 | LG8 | hypothetical protein CICLE_v1 | not DE   | not DE   | not DE   | not DE  |
| EVM0019009 | LG8 | hypothetical protein CICLE_v1 | not DE   | not DE   | not DE   | not DE  |
| EVM0016516 | LG8 | hypothetical protein CICLE_v1 | not DE   | not DE   | not DE   | not DE  |
| EVM0014251 | LG8 | hypothetical protein CICLE_v1 | not DE   | not DE   | not DE   | not DE  |
| EVM0017146 | LG8 | hypothetical protein CICLE_v1 | not DE   | not DE   | not DE   | not DE  |
| EVM0017452 | LG8 | hypothetical protein CICLE_v1 | not DE   | not DE   | not DE   | not DE  |
| EVM0004466 | LG8 | hypothetical protein CICLE_v1 | not DE   | not DE   | not DE   | not DE  |
| EVM0013823 | LG8 | hypothetical protein CICLE_v1 | not DE   | not DE   | not DE   | not DE  |
| EVM0009340 | LG8 | hypothetical protein CICLE_v1 | not DE   | not DE   | not DE   | not DE  |
| EVM0012147 | LG8 | hypothetical protein CICLE_v1 | not DE   | not DE   | not DE   | not DE  |
| EVM0006385 | LG8 | hypothetical protein CICLE_v1 | not DE   | not DE   | not DE   | not DE  |
| EVM0018489 | LG8 | hypothetical protein CICLE_v1 | 3.114669 | 0.001529 | not DE   | not DE  |
| EVM0001592 | LG8 | hypothetical protein CICLE_v1 | not DE   | not DE   | not DE   | not DE  |
| EVM0004890 | LG8 | hypothetical protein CICLE_v1 | not DE   | not DE   | not DE   | not DE  |
| EVM0018778 | LG8 | hypothetical protein CICLE_v1 | not DE   | not DE   | not DE   | not DE  |
| EVM0013189 | LG8 | hypothetical protein CICLE_v1 | not DE   | not DE   | not DE   | not DE  |
| EVM0019416 | LG8 | hypothetical protein CICLE_v1 | not DE   | not DE   | not DE   | not DE  |
| EVM0004239 | LG8 | hypothetical protein CICLE_v1 | not DE   | not DE   | not DE   | not DE  |
| EVM0006015 | LG8 | hypothetical protein CICLE_v1 | not DE   | not DE   | not DE   | not DE  |

|            |     |                               |          |          |          |         |
|------------|-----|-------------------------------|----------|----------|----------|---------|
| EVM0012363 | LG8 | hypothetical protein CICLE_v1 | -1.94102 | 0.006306 | not DE   | not DE  |
| EVM0012787 | LG8 | hypothetical protein CICLE_v1 | not DE   | not DE   | not DE   | not DE  |
| EVM0021196 | LG8 | hypothetical protein CICLE_v1 | not DE   | not DE   | not DE   | not DE  |
| EVM0015307 | LG8 | hypothetical protein CICLE_v1 | not DE   | not DE   | not DE   | not DE  |
| EVM0023548 | LG8 | hypothetical protein CICLE_v1 | 2.181034 | 0.002909 | not DE   | not DE  |
| EVM0003355 | LG8 | hypothetical protein CICLE_v1 | not DE   | not DE   | not DE   | not DE  |
| EVM0008716 | LG8 | hypothetical protein CICLE_v1 | not DE   | not DE   | not DE   | not DE  |
| EVM0000164 | LG8 | hypothetical protein CICLE_v1 | not DE   | not DE   | not DE   | not DE  |
| EVM0020853 | LG8 | hypothetical protein CICLE_v1 | not DE   | not DE   | -1.13014 | #####   |
| EVM0011508 | LG8 | hypothetical protein CICLE_v1 | not DE   | not DE   | not DE   | not DE  |
| EVM0014882 | LG8 | hypothetical protein CICLE_v1 | not DE   | not DE   | not DE   | not DE  |
| EVM0009219 | LG8 | hypothetical protein CICLE_v1 | not DE   | not DE   | not DE   | not DE  |
| EVM0014370 | LG8 | hypothetical protein CICLE_v1 | not DE   | not DE   | not DE   | not DE  |
| EVM0014910 | LG8 | hypothetical protein CICLE_v1 | not DE   | not DE   | not DE   | not DE  |
| EVM0002453 | LG8 | hypothetical protein CICLE_v1 | not DE   | not DE   | -1.44172 | 0.00271 |
| EVM0010817 | LG8 | hypothetical protein CICLE_v1 | -1.653   | 0.002663 | not DE   | not DE  |
| EVM0023015 | LG8 | hypothetical protein CICLE_v1 | not DE   | not DE   | not DE   | not DE  |
| EVM0012505 | LG8 | hypothetical protein CICLE_v1 | not DE   | not DE   | not DE   | not DE  |
| EVM0010348 | LG8 | hypothetical protein CICLE_v1 | not DE   | not DE   | not DE   | not DE  |
| EVM0021807 | LG8 | hypothetical protein CICLE_v1 | not DE   | not DE   | not DE   | not DE  |
| EVM0006366 | LG8 | hypothetical protein CICLE_v1 | not DE   | not DE   | not DE   | not DE  |
| EVM0010158 | LG8 | hypothetical protein CICLE_v1 | not DE   | not DE   | not DE   | not DE  |
| EVM0022350 | LG8 | hypothetical protein CICLE_v1 | not DE   | not DE   | not DE   | not DE  |
| EVM0000617 | LG8 | hypothetical protein CICLE_v1 | not DE   | not DE   | not DE   | not DE  |
| EVM0002517 | LG8 | hypothetical protein CICLE_v1 | not DE   | not DE   | not DE   | not DE  |
| EVM0016926 | LG8 | hypothetical protein CICLE_v1 | not DE   | not DE   | not DE   | not DE  |
| EVM0022153 | LG8 | hypothetical protein CICLE_v1 | -2.33159 | 0.022527 | not DE   | not DE  |
| EVM0022937 | LG8 | hypothetical protein CICLE_v1 | not DE   | not DE   | not DE   | not DE  |
| EVM0024082 | LG8 | hypothetical protein CICLE_v1 | not DE   | not DE   | not DE   | not DE  |
| EVM0024169 | LG8 | hypothetical protein CICLE_v1 | not DE   | not DE   | not DE   | not DE  |
| EVM0006581 | LG8 | hypothetical protein CICLE_v1 | not DE   | not DE   | not DE   | not DE  |
| EVM0014189 | LG8 | hypothetical protein CICLE_v1 | 2.065854 | 0.003881 | not DE   | not DE  |
| EVM0023109 | LG8 | hypothetical protein CICLE_v1 | not DE   | not DE   | not DE   | not DE  |
| EVM0020740 | LG8 | hypothetical protein CICLE_v1 | not DE   | not DE   | not DE   | not DE  |
| EVM0010781 | LG8 | hypothetical protein CICLE_v1 | not DE   | not DE   | not DE   | not DE  |
| EVM0019903 | LG8 | hypothetical protein CICLE_v1 | not DE   | not DE   | not DE   | not DE  |
| EVM0009903 | LG8 | hypothetical protein CICLE_v1 | not DE   | not DE   | not DE   | not DE  |
| EVM0005664 | LG8 | hypothetical protein CICLE_v1 | not DE   | not DE   | not DE   | not DE  |
| EVM0013689 | LG8 | hypothetical protein CICLE_v1 | -1.90535 | 0.00033  | not DE   | not DE  |
| EVM0017732 | LG8 | hypothetical protein CICLE_v1 | not DE   | not DE   | not DE   | not DE  |
| EVM0016925 | LG8 | hypothetical protein CICLE_v1 | not DE   | not DE   | not DE   | not DE  |
| EVM0006636 | LG8 | hypothetical protein CICLE_v1 | not DE   | not DE   | not DE   | not DE  |
| EVM0006352 | LG8 | hypothetical protein CICLE_v1 | not DE   | not DE   | not DE   | not DE  |
| EVM0004875 | LG8 | hypothetical protein CICLE_v1 | not DE   | not DE   | not DE   | not DE  |
| EVM0019105 | LG8 | hypothetical protein CICLE_v1 | not DE   | not DE   | not DE   | not DE  |
| EVM0003779 | LG8 | hypothetical protein CICLE_v1 | 3.827504 | 2.42E-05 | not DE   | not DE  |
| EVM0012752 | LG8 | hypothetical protein CICLE_v1 | not DE   | not DE   | not DE   | not DE  |
| EVM0008905 | LG8 | hypothetical protein CICLE_v1 | not DE   | not DE   | not DE   | not DE  |
| EVM0004105 | LG8 | hypothetical protein CICLE_v1 | not DE   | not DE   | not DE   | not DE  |
| EVM0007459 | LG8 | hypothetical protein CICLE_v1 | not DE   | not DE   | not DE   | not DE  |
| EVM0011774 | LG8 | hypothetical protein CICLE_v1 | not DE   | not DE   | not DE   | not DE  |
| EVM0008505 | LG8 | hypothetical protein CICLE_v1 | not DE   | not DE   | not DE   | not DE  |
| EVM0000349 | LG8 | hypothetical protein CICLE_v1 | -1.45373 | 0.00358  | not DE   | not DE  |
| EVM0024441 | LG8 | hypothetical protein CICLE_v1 | not DE   | not DE   | -1.80819 | 0.00067 |

|            |     |                               |          |          |          |         |
|------------|-----|-------------------------------|----------|----------|----------|---------|
| EVM0009388 | LG8 | hypothetical protein CICLE_v1 | not DE   | not DE   | not DE   | not DE  |
| EVM0003711 | LG8 | hypothetical protein CICLE_v1 | not DE   | not DE   | not DE   | not DE  |
| EVM0021425 | LG8 | hypothetical protein CICLE_v1 | -1.6576  | 3.75E-13 | not DE   | not DE  |
| EVM0022072 | LG8 | hypothetical protein CICLE_v1 | not DE   | not DE   | not DE   | not DE  |
| EVM0020359 | LG8 | hypothetical protein CICLE_v1 | not DE   | not DE   | not DE   | not DE  |
| EVM0009514 | LG8 | hypothetical protein CICLE_v1 | not DE   | not DE   | not DE   | not DE  |
| EVM0011825 | LG8 | hypothetical protein CICLE_v1 | not DE   | not DE   | not DE   | not DE  |
| EVM0023772 | LG8 | hypothetical protein CICLE_v1 | not DE   | not DE   | not DE   | not DE  |
| EVM0002314 | LG8 | hypothetical protein CICLE_v1 | not DE   | not DE   | not DE   | not DE  |
| EVM0006935 | LG8 | hypothetical protein CICLE_v1 | not DE   | not DE   | not DE   | not DE  |
| EVM0009089 | LG8 | hypothetical protein CICLE_v1 | not DE   | not DE   | not DE   | not DE  |
| EVM0021979 | LG8 | hypothetical protein CICLE_v1 | not DE   | not DE   | not DE   | not DE  |
| EVM0010327 | LG8 | hypothetical protein CICLE_v1 | not DE   | not DE   | not DE   | not DE  |
| EVM0020294 | LG8 | hypothetical protein CICLE_v1 | not DE   | not DE   | 1.599176 | 0.04192 |
| EVM0011094 | LG8 | hypothetical protein CICLE_v1 | not DE   | not DE   | not DE   | not DE  |
| EVM0005333 | LG8 | hypothetical protein CICLE_v1 | not DE   | not DE   | not DE   | not DE  |
| EVM0013254 | LG8 | hypothetical protein CICLE_v1 | not DE   | not DE   | not DE   | not DE  |
| EVM0003847 | LG8 | hypothetical protein CICLE_v1 | not DE   | not DE   | not DE   | not DE  |
| EVM0011769 | LG8 | hypothetical protein CICLE_v1 | not DE   | not DE   | not DE   | not DE  |
| EVM0015513 | LG8 | hypothetical protein CICLE_v1 | not DE   | not DE   | not DE   | not DE  |
| EVM0003627 | LG8 | hypothetical protein CICLE_v1 | not DE   | not DE   | not DE   | not DE  |
| EVM0013902 | LG8 | hypothetical protein CICLE_v1 | not DE   | not DE   | not DE   | not DE  |
| EVM0014352 | LG8 | hypothetical protein CICLE_v1 | not DE   | not DE   | not DE   | not DE  |
| EVM0022947 | LG8 | hypothetical protein CICLE_v1 | not DE   | not DE   | not DE   | not DE  |
| EVM0014684 | LG8 | hypothetical protein CICLE_v1 | not DE   | not DE   | not DE   | not DE  |
| EVM0015592 | LG8 | hypothetical protein CICLE_v1 | not DE   | not DE   | not DE   | not DE  |
| EVM0022705 | LG8 | hypothetical protein CICLE_v1 | not DE   | not DE   | not DE   | not DE  |
| EVM0003803 | LG8 | hypothetical protein CICLE_v1 | not DE   | not DE   | not DE   | not DE  |
| EVM0015186 | LG8 | hypothetical protein CICLE_v1 | not DE   | not DE   | not DE   | not DE  |
| EVM0017841 | LG8 | hypothetical protein CICLE_v1 | not DE   | not DE   | not DE   | not DE  |
| EVM0021846 | LG8 | hypothetical protein CICLE_v1 | not DE   | not DE   | not DE   | not DE  |
| EVM0002125 | LG8 | hypothetical protein CICLE_v1 | not DE   | not DE   | not DE   | not DE  |
| EVM0008383 | LG8 | hypothetical protein CICLE_v1 | not DE   | not DE   | not DE   | not DE  |
| EVM0005439 | LG8 | hypothetical protein CICLE_v1 | not DE   | not DE   | not DE   | not DE  |
| EVM0013041 | LG8 | hypothetical protein CICLE_v1 | not DE   | not DE   | not DE   | not DE  |
| EVM0006408 | LG8 | hypothetical protein CICLE_v1 | not DE   | not DE   | not DE   | not DE  |
| EVM0004561 | LG8 | hypothetical protein CICLE_v1 | not DE   | not DE   | not DE   | not DE  |
| EVM0018999 | LG8 | hypothetical protein CICLE_v1 | -2.79422 | 0.000348 | not DE   | not DE  |
| EVM0007839 | LG8 | hypothetical protein CICLE_v1 | not DE   | not DE   | not DE   | not DE  |
| EVM0000036 | LG8 | hypothetical protein CICLE_v1 | not DE   | not DE   | not DE   | not DE  |
| EVM0000041 | LG8 | hypothetical protein CICLE_v1 | not DE   | not DE   | not DE   | not DE  |
| EVM0003743 | LG8 | hypothetical protein CICLE_v1 | not DE   | not DE   | not DE   | not DE  |
| EVM0018464 | LG8 | hypothetical protein CICLE_v1 | not DE   | not DE   | not DE   | not DE  |
| EVM0020466 | LG8 | hypothetical protein CICLE_v1 | 2.083178 | 0.016177 | not DE   | not DE  |
| EVM0003108 | LG8 | hypothetical protein CICLE_v1 | -5.08961 | 0.005754 | not DE   | not DE  |
| EVM0022502 | LG8 | hypothetical protein CICLE_v1 | not DE   | not DE   | not DE   | not DE  |
| EVM0012938 | LG8 | hypothetical protein CICLE_v1 | -1.52682 | 0.000915 | not DE   | not DE  |
| EVM0017239 | LG8 | hypothetical protein CICLE_v1 | 2.994645 | 0.000215 | not DE   | not DE  |
| EVM0010358 | LG8 | hypothetical protein CICLE_v1 | -3.29979 | 3.45E-05 | -1.98777 | #####   |
| EVM0023887 | LG8 | hypothetical protein CICLE_v1 | not DE   | not DE   | not DE   | not DE  |
| EVM0004089 | LG8 | hypothetical protein CICLE_v1 | not DE   | not DE   | not DE   | not DE  |
| EVM0010649 | LG8 | hypothetical protein CICLE_v1 | not DE   | not DE   | not DE   | not DE  |
| EVM0015545 | LG8 | hypothetical protein CICLE_v1 | not DE   | not DE   | not DE   | not DE  |
| EVM0001503 | LG8 | hypothetical protein CICLE_v1 | not DE   | not DE   | not DE   | not DE  |

|            |     |                               |          |          |          |        |
|------------|-----|-------------------------------|----------|----------|----------|--------|
| EVM0010740 | LG8 | hypothetical protein CICLE_v1 | not DE   | not DE   | not DE   | not DE |
| EVM0000595 | LG8 | hypothetical protein CICLE_v1 | not DE   | not DE   | not DE   | not DE |
| EVM0023614 | LG8 | hypothetical protein CICLE_v1 | not DE   | not DE   | not DE   | not DE |
| EVM0001446 | LG8 | hypothetical protein CICLE_v1 | not DE   | not DE   | -1.44553 | #####  |
| EVM0014037 | LG8 | hypothetical protein CICLE_v1 | not DE   | not DE   | not DE   | not DE |
| EVM0012822 | LG8 | hypothetical protein CICLE_v1 | not DE   | not DE   | not DE   | not DE |
| EVM0014412 | LG8 | hypothetical protein CICLE_v1 | not DE   | not DE   | not DE   | not DE |
| EVM0019297 | LG8 | hypothetical protein CICLE_v1 | not DE   | not DE   | not DE   | not DE |
| EVM0021251 | LG8 | hypothetical protein CICLE_v1 | not DE   | not DE   | not DE   | not DE |
| EVM0010243 | LG8 | hypothetical protein CICLE_v1 | not DE   | not DE   | not DE   | not DE |
| EVM0002718 | LG8 | hypothetical protein CICLE_v1 | not DE   | not DE   | not DE   | not DE |
| EVM0017879 | LG8 | hypothetical protein CICLE_v1 | not DE   | not DE   | not DE   | not DE |
| EVM0019685 | LG8 | hypothetical protein CICLE_v1 | not DE   | not DE   | not DE   | not DE |
| EVM0015792 | LG8 | hypothetical protein CICLE_v1 | not DE   | not DE   | not DE   | not DE |
| EVM0023640 | LG8 | hypothetical protein CICLE_v1 | not DE   | not DE   | not DE   | not DE |
| EVM0011735 | LG8 | hypothetical protein CICLE_v1 | not DE   | not DE   | not DE   | not DE |
| EVM0017042 | LG8 | hypothetical protein CICLE_v1 | not DE   | not DE   | not DE   | not DE |
| EVM0010349 | LG8 | hypothetical protein CICLE_v1 | not DE   | not DE   | not DE   | not DE |
| EVM0021168 | LG8 | hypothetical protein CICLE_v1 | not DE   | not DE   | not DE   | not DE |
| EVM0010818 | LG8 | hypothetical protein CICLE_v1 | not DE   | not DE   | not DE   | not DE |
| EVM0005199 | LG8 | hypothetical protein CICLE_v1 | not DE   | not DE   | not DE   | not DE |
| EVM0024106 | LG8 | hypothetical protein CICLE_v1 | not DE   | not DE   | not DE   | not DE |
| EVM0008622 | LG8 | hypothetical protein CICLE_v1 | -1.27374 | 0.004684 | not DE   | not DE |
| EVM0018967 | LG8 | hypothetical protein CICLE_v1 | not DE   | not DE   | not DE   | not DE |
| EVM0021280 | LG8 | hypothetical protein CICLE_v1 | not DE   | not DE   | not DE   | not DE |
| EVM0011730 | LG8 | hypothetical protein CICLE_v1 | 1.725425 | 0.014569 | not DE   | not DE |
| EVM0014593 | LG8 | hypothetical protein CICLE_v1 | 1.37372  | 0.015487 | not DE   | not DE |
| EVM0020618 | LG8 | hypothetical protein CICLE_v1 | not DE   | not DE   | not DE   | not DE |
| EVM0014903 | LG8 | hypothetical protein CICLE_v1 | not DE   | not DE   | not DE   | not DE |
| EVM0010879 | LG8 | hypothetical protein CICLE_v1 | not DE   | not DE   | not DE   | not DE |
| EVM0007730 | LG8 | hypothetical protein CICLE_v1 | not DE   | not DE   | not DE   | not DE |
| EVM0004389 | LG8 | hypothetical protein CICLE_v1 | not DE   | not DE   | not DE   | not DE |
| EVM0002934 | LG8 | hypothetical protein CICLE_v1 | not DE   | not DE   | not DE   | not DE |
| EVM0018400 | LG8 | hypothetical protein CICLE_v1 | 3.689251 | 0.032928 | not DE   | not DE |
| EVM0015510 | LG8 | hypothetical protein CICLE_v1 | 1.017879 | 0.000478 | not DE   | not DE |
| EVM0018085 | LG8 | hypothetical protein CICLE_v1 | not DE   | not DE   | not DE   | not DE |
| EVM0001374 | LG8 | hypothetical protein CICLE_v1 | not DE   | not DE   | not DE   | not DE |
| EVM0020433 | LG8 | hypothetical protein CICLE_v1 | not DE   | not DE   | not DE   | not DE |
| EVM0016882 | LG8 | hypothetical protein CICLE_v1 | not DE   | not DE   | not DE   | not DE |
| EVM0021465 | LG8 | hypothetical protein CICLE_v1 | not DE   | not DE   | not DE   | not DE |
| EVM0013052 | LG8 | hypothetical protein CICLE_v1 | not DE   | not DE   | not DE   | not DE |
| EVM0011382 | LG8 | hypothetical protein CICLE_v1 | not DE   | not DE   | not DE   | not DE |
| EVM0002981 | LG8 | hypothetical protein CICLE_v1 | not DE   | not DE   | not DE   | not DE |
| EVM0002196 | LG8 | hypothetical protein CICLE_v1 | not DE   | not DE   | not DE   | not DE |
| EVM0006846 | LG8 | hypothetical protein CICLE_v1 | not DE   | not DE   | not DE   | not DE |
| EVM0011845 | LG8 | hypothetical protein CICLE_v1 | not DE   | not DE   | not DE   | not DE |
| EVM0010746 | LG8 | hypothetical protein CICLE_v1 | not DE   | not DE   | not DE   | not DE |
| EVM0023185 | LG8 | hypothetical protein CICLE_v1 | 1.257608 | 0.000615 | not DE   | not DE |
| EVM0006387 | LG8 | hypothetical protein CICLE_v1 | not DE   | not DE   | not DE   | not DE |
| EVM0017165 | LG8 | hypothetical protein CICLE_v1 | not DE   | not DE   | not DE   | not DE |
| EVM0015522 | LG8 | hypothetical protein CICLE_v1 | not DE   | not DE   | not DE   | not DE |
| EVM0011180 | LG8 | hypothetical protein CICLE_v1 | not DE   | not DE   | not DE   | not DE |
| EVM0023591 | LG8 | hypothetical protein CICLE_v1 | not DE   | not DE   | not DE   | not DE |
| EVM0009730 | LG8 | hypothetical protein CICLE_v1 | not DE   | not DE   | not DE   | not DE |

|            |     |                               |          |          |          |         |
|------------|-----|-------------------------------|----------|----------|----------|---------|
| EVM0010582 | LG8 | hypothetical protein CICLE_v1 | -3.66543 | 0.000363 | -2.15006 | #####   |
| EVM0008644 | LG8 | hypothetical protein CICLE_v1 | not DE   | not DE   | not DE   | not DE  |
| EVM0018693 | LG8 | hypothetical protein CICLE_v1 | not DE   | not DE   | not DE   | not DE  |
| EVM0003472 | LG8 | hypothetical protein CICLE_v1 | not DE   | not DE   | not DE   | not DE  |
| EVM0020716 | LG8 | hypothetical protein CICLE_v1 | -1.12991 | 0.027761 | not DE   | not DE  |
| EVM0013406 | LG8 | hypothetical protein CICLE_v1 | not DE   | not DE   | not DE   | not DE  |
| EVM0019274 | LG8 | hypothetical protein CICLE_v1 | not DE   | not DE   | not DE   | not DE  |
| EVM0007668 | LG8 | hypothetical protein CICLE_v1 | not DE   | not DE   | not DE   | not DE  |
| EVM0012642 | LG8 | hypothetical protein CICLE_v1 | not DE   | not DE   | not DE   | not DE  |
| EVM0021191 | LG8 | hypothetical protein CICLE_v1 | not DE   | not DE   | not DE   | not DE  |
| EVM0005723 | LG8 | hypothetical protein CICLE_v1 | not DE   | not DE   | not DE   | not DE  |
| EVM0024372 | LG8 | hypothetical protein CICLE_v1 | not DE   | not DE   | 1.089569 | 0.00457 |
| EVM0018321 | LG8 | hypothetical protein CICLE_v1 | not DE   | not DE   | not DE   | not DE  |
| EVM0020488 | LG8 | hypothetical protein CICLE_v1 | not DE   | not DE   | 1.694534 | #####   |
| EVM0023960 | LG8 | hypothetical protein CICLE_v1 | -1.72732 | 0.002925 | not DE   | not DE  |
| EVM0023862 | LG8 | hypothetical protein CICLE_v1 | not DE   | not DE   | not DE   | not DE  |
| EVM0002197 | LG8 | hypothetical protein CICLE_v1 | not DE   | not DE   | not DE   | not DE  |
| EVM0013028 | LG8 | hypothetical protein CICLE_v1 | not DE   | not DE   | not DE   | not DE  |
| EVM0007398 | LG8 | hypothetical protein CICLE_v1 | not DE   | not DE   | not DE   | not DE  |
| EVM0015652 | LG8 | hypothetical protein CICLE_v1 | not DE   | not DE   | not DE   | not DE  |
| EVM0008442 | LG8 | hypothetical protein CICLE_v1 | not DE   | not DE   | not DE   | not DE  |
| EVM0010608 | LG8 | hypothetical protein CICLE_v1 | not DE   | not DE   | not DE   | not DE  |
| EVM0002312 | LG8 | hypothetical protein CICLE_v1 | not DE   | not DE   | not DE   | not DE  |
| EVM0005060 | LG8 | hypothetical protein CICLE_v1 | not DE   | not DE   | not DE   | not DE  |
| EVM0020031 | LG8 | hypothetical protein CICLE_v1 | not DE   | not DE   | not DE   | not DE  |
| EVM0018135 | LG8 | hypothetical protein CICLE_v1 | not DE   | not DE   | not DE   | not DE  |
| EVM0008003 | LG8 | hypothetical protein CICLE_v1 | not DE   | not DE   | not DE   | not DE  |
| EVM0017274 | LG8 | hypothetical protein CICLE_v1 | not DE   | not DE   | 1.252064 | 0.00065 |
| EVM0000711 | LG8 | hypothetical protein CICLE_v1 | not DE   | not DE   | 1.709724 | 0.02123 |
| EVM0001667 | LG8 | hypothetical protein CICLE_v1 | not DE   | not DE   | not DE   | not DE  |
| EVM0022164 | LG8 | hypothetical protein CICLE_v1 | not DE   | not DE   | not DE   | not DE  |
| EVM0004700 | LG8 | hypothetical protein CICLE_v1 | 1.125446 | 0.000152 | 1.174789 | #####   |
| EVM0018297 | LG8 | hypothetical protein CICLE_v1 | not DE   | not DE   | 1.35342  | #####   |
| EVM0024405 | LG8 | hypothetical protein CICLE_v1 | not DE   | not DE   | not DE   | not DE  |
| EVM0022471 | LG8 | hypothetical protein CICLE_v1 | not DE   | not DE   | not DE   | not DE  |
| EVM0009724 | LG8 | hypothetical protein CICLE_v1 | not DE   | not DE   | 1.457064 | 0.00103 |
| EVM0005680 | LG8 | hypothetical protein CICLE_v1 | not DE   | not DE   | not DE   | not DE  |
| EVM0012365 | LG8 | hypothetical protein CICLE_v1 | not DE   | not DE   | not DE   | not DE  |
| EVM0013710 | LG8 | hypothetical protein CICLE_v1 | not DE   | not DE   | not DE   | not DE  |
| EVM0016312 | LG8 | hypothetical protein CICLE_v1 | not DE   | not DE   | not DE   | not DE  |
| EVM0023574 | LG8 | hypothetical protein CICLE_v1 | not DE   | not DE   | not DE   | not DE  |
| EVM0011846 | LG8 | hypothetical protein CICLE_v1 | not DE   | not DE   | not DE   | not DE  |
| EVM0016620 | LG8 | hypothetical protein CICLE_v1 | not DE   | not DE   | 1.798245 | #####   |
| EVM0023192 | LG8 | hypothetical protein CICLE_v1 | 2.592657 | 0.002438 | not DE   | not DE  |
| EVM0013794 | LG8 | hypothetical protein CICLE_v1 | not DE   | not DE   | not DE   | not DE  |
| EVM0013884 | LG8 | hypothetical protein CICLE_v1 | not DE   | not DE   | not DE   | not DE  |
| EVM0019721 | LG8 | hypothetical protein CICLE_v1 | not DE   | not DE   | not DE   | not DE  |
| EVM0021669 | LG8 | hypothetical protein CICLE_v1 | not DE   | not DE   | not DE   | not DE  |
| EVM0009785 | LG8 | hypothetical protein CICLE_v1 | not DE   | not DE   | not DE   | not DE  |
| EVM0009534 | LG8 | hypothetical protein CICLE_v1 | not DE   | not DE   | not DE   | not DE  |
| EVM0011865 | LG8 | hypothetical protein CICLE_v1 | not DE   | not DE   | not DE   | not DE  |
| EVM0006850 | LG8 | hypothetical protein CICLE_v1 | 2.340711 | 0.000495 | not DE   | not DE  |
| EVM0003378 | LG8 | hypothetical protein CICLE_v1 | not DE   | not DE   | not DE   | not DE  |
| EVM0019694 | LG8 | hypothetical protein CICLE_v1 | not DE   | not DE   | not DE   | not DE  |

|            |     |                               |        |        |          |         |
|------------|-----|-------------------------------|--------|--------|----------|---------|
| EVM0009316 | LG8 | hypothetical protein CICLE_v1 | not DE | not DE | not DE   | not DE  |
| EVM0019316 | LG8 | hypothetical protein CICLE_v1 | not DE | not DE | not DE   | not DE  |
| EVM0001820 | LG8 | hypothetical protein CICLE_v1 | not DE | not DE | not DE   | not DE  |
| EVM0009183 | LG8 | hypothetical protein CICLE_v1 | not DE | not DE | not DE   | not DE  |
| EVM0012871 | LG8 | hypothetical protein CICLE_v1 | not DE | not DE | 2.804143 | #####   |
| EVM0004286 | LG8 | hypothetical protein CICLE_v1 | not DE | not DE | not DE   | not DE  |
| EVM0014471 | LG8 | hypothetical protein CICLE_v1 | not DE | not DE | not DE   | not DE  |
| EVM0005957 | LG8 | hypothetical protein CICLE_v1 | not DE | not DE | not DE   | not DE  |
| EVM0019672 | LG8 | hypothetical protein CICLE_v1 | not DE | not DE | not DE   | not DE  |
| EVM0019335 | LG8 | hypothetical protein CICLE_v1 | not DE | not DE | 1.047566 | 0.02301 |
| EVM0008594 | LG8 | hypothetical protein CICLE_v1 | not DE | not DE | not DE   | not DE  |
| EVM0000958 | LG8 | hypothetical protein CICLE_v1 | not DE | not DE | not DE   | not DE  |
| EVM0007094 | LG8 | hypothetical protein CICLE_v1 | not DE | not DE | not DE   | not DE  |
| EVM0023632 | LG8 | hypothetical protein CICLE_v1 | not DE | not DE | not DE   | not DE  |
| EVM0016603 | LG8 | hypothetical protein CISIN_1g | not DE | not DE | not DE   | not DE  |
| EVM0016135 | LG8 | hypothetical protein CISIN_1g | not DE | not DE | not DE   | not DE  |
| EVM0012953 | LG8 | hypothetical protein CISIN_1g | not DE | not DE | not DE   | not DE  |
| EVM0001202 | LG8 | hypothetical protein CISIN_1g | not DE | not DE | -1.16887 | 0.00021 |
| EVM0020093 | LG8 | hypothetical protein CISIN_1g | not DE | not DE | not DE   | not DE  |
| EVM0000722 | LG8 | hypothetical protein CISIN_1g | not DE | not DE | not DE   | not DE  |
| EVM0021069 | LG8 | hypothetical protein CISIN_1g | not DE | not DE | not DE   | not DE  |
| EVM0010799 | LG8 | hypothetical protein CISIN_1g | not DE | not DE | not DE   | not DE  |
| EVM0018839 | LG8 | hypothetical protein CISIN_1g | not DE | not DE | not DE   | not DE  |
| EVM0023544 | LG8 | hypothetical protein CISIN_1g | not DE | not DE | not DE   | not DE  |
| EVM0017231 | LG8 | hypothetical protein CISIN_1g | not DE | not DE | not DE   | not DE  |
| EVM0020521 | LG8 | hypothetical protein CISIN_1g | not DE | not DE | not DE   | not DE  |
| EVM0013548 | LG8 | hypothetical protein CISIN_1g | not DE | not DE | not DE   | not DE  |
| EVM0020841 | LG8 | hypothetical protein CISIN_1g | not DE | not DE | not DE   | not DE  |
| EVM0009957 | LG8 | hypothetical protein CISIN_1g | not DE | not DE | not DE   | not DE  |
| EVM0015263 | LG8 | hypothetical protein CISIN_1g | not DE | not DE | not DE   | not DE  |
| EVM0003704 | LG8 | hypothetical protein CISIN_1g | not DE | not DE | not DE   | not DE  |
| EVM0009243 | LG8 | hypothetical protein CISIN_1g | not DE | not DE | not DE   | not DE  |
| EVM0002557 | LG8 | hypothetical protein CISIN_1g | not DE | not DE | not DE   | not DE  |
| EVM0011710 | LG8 | hypothetical protein CISIN_1g | not DE | not DE | not DE   | not DE  |
| EVM0015436 | LG8 | hypothetical protein CISIN_1g | not DE | not DE | not DE   | not DE  |
| EVM0022611 | LG8 | hypothetical protein CISIN_1g | not DE | not DE | -2.22287 | #####   |
| EVM0005775 | LG8 | hypothetical protein CISIN_1g | not DE | not DE | not DE   | not DE  |
| EVM0008221 | LG8 | hypothetical protein CISIN_1g | not DE | not DE | not DE   | not DE  |
| EVM0002900 | LG8 | hypothetical protein CISIN_1g | not DE | not DE | not DE   | not DE  |
| EVM0008093 | LG8 | hypothetical protein CISIN_1g | not DE | not DE | not DE   | not DE  |
| EVM0005111 | LG8 | hypothetical protein CISIN_1g | not DE | not DE | not DE   | not DE  |
| EVM0019605 | LG8 | hypothetical protein CISIN_1g | not DE | not DE | not DE   | not DE  |
| EVM0004990 | LG8 | hypothetical protein CISIN_1g | not DE | not DE | not DE   | not DE  |
| EVM0022754 | LG8 | hypothetical protein CISIN_1g | not DE | not DE | not DE   | not DE  |
| EVM0023535 | LG8 | hypothetical protein CISIN_1g | not DE | not DE | not DE   | not DE  |
| EVM0009358 | LG8 | hypothetical protein CISIN_1g | not DE | not DE | not DE   | not DE  |
| EVM0022130 | LG8 | hypothetical protein CISIN_1g | not DE | not DE | not DE   | not DE  |
| EVM0014902 | LG8 | hypothetical protein CISIN_1g | not DE | not DE | not DE   | not DE  |
| EVM0000777 | LG8 | hypothetical protein CISIN_1g | not DE | not DE | not DE   | not DE  |
| EVM0009468 | LG8 | hypothetical protein CISIN_1g | not DE | not DE | not DE   | not DE  |
| EVM0014367 | LG8 | hypothetical protein CISIN_1g | not DE | not DE | not DE   | not DE  |
| EVM0001574 | LG8 | hypothetical protein CISIN_1g | not DE | not DE | not DE   | not DE  |
| EVM0024605 | LG8 | hypothetical protein CISIN_1g | not DE | not DE | not DE   | not DE  |
| EVM0007849 | LG8 | hypothetical protein CISIN_1g | not DE | not DE | not DE   | not DE  |

|            |     |                               |          |          |          |         |
|------------|-----|-------------------------------|----------|----------|----------|---------|
| EVM0009627 | LG8 | hypothetical protein CISIN_1g | not DE   | not DE   | not DE   | not DE  |
| EVM0022468 | LG8 | hypothetical protein CISIN_1g | not DE   | not DE   | not DE   | not DE  |
| EVM0003288 | LG8 | hypothetical protein CISIN_1g | not DE   | not DE   | not DE   | not DE  |
| EVM0009881 | LG8 | hypothetical protein CISIN_1g | not DE   | not DE   | not DE   | not DE  |
| EVM0022135 | LG8 | hypothetical protein CISIN_1g | not DE   | not DE   | not DE   | not DE  |
| EVM0014959 | LG8 | hypothetical protein CISIN_1g | not DE   | not DE   | not DE   | not DE  |
| EVM0001287 | LG8 | hypothetical protein CISIN_1g | not DE   | not DE   | not DE   | not DE  |
| EVM0007304 | LG8 | hypothetical protein CISIN_1g | not DE   | not DE   | not DE   | not DE  |
| EVM0021128 | LG8 | hypothetical protein CISIN_1g | not DE   | not DE   | not DE   | not DE  |
| EVM0004034 | LG8 | hypothetical protein CISIN_1g | not DE   | not DE   | not DE   | not DE  |
| EVM0012308 | LG8 | hypothetical protein CISIN_1g | not DE   | not DE   | not DE   | not DE  |
| EVM0021689 | LG8 | hypothetical protein CISIN_1g | not DE   | not DE   | not DE   | not DE  |
| EVM0004485 | LG8 | hypothetical protein CISIN_1g | not DE   | not DE   | -6.86889 | #####   |
| EVM0019282 | LG8 | hypothetical protein CISIN_1g | not DE   | not DE   | not DE   | not DE  |
| EVM0014298 | LG8 | hypothetical protein CISIN_1g | not DE   | not DE   | not DE   | not DE  |
| EVM0007985 | LG8 | hypothetical protein CISIN_1g | not DE   | not DE   | not DE   | not DE  |
| EVM0022226 | LG8 | hypothetical protein CISIN_1g | not DE   | not DE   | not DE   | not DE  |
| EVM0003474 | LG8 | hypothetical protein CISIN_1g | not DE   | not DE   | not DE   | not DE  |
| EVM0020178 | LG8 | hypothetical protein CISIN_1g | not DE   | not DE   | not DE   | not DE  |
| EVM0002805 | LG8 | hypothetical protein CISIN_1g | 1.059957 | 0.045723 | not DE   | not DE  |
| EVM0016352 | LG8 | hypothetical protein CISIN_1g | not DE   | not DE   | not DE   | not DE  |
| EVM0004753 | LG8 | hypothetical protein CISIN_1g | not DE   | not DE   | not DE   | not DE  |
| EVM0005311 | LG8 | hypothetical protein CISIN_1g | -2.22559 | 0.00319  | not DE   | not DE  |
| EVM0001809 | LG8 | hypothetical protein CISIN_1g | not DE   | not DE   | not DE   | not DE  |
| EVM0017420 | LG8 | hypothetical protein CISIN_1g | 6.305086 | 0.000119 | not DE   | not DE  |
| EVM0021817 | LG8 | hypothetical protein CISIN_1g | not DE   | not DE   | not DE   | not DE  |
| EVM0024334 | LG8 | hypothetical protein CISIN_1g | not DE   | not DE   | not DE   | not DE  |
| EVM0015068 | LG8 | hypothetical protein CISIN_1g | not DE   | not DE   | not DE   | not DE  |
| EVM0005381 | LG8 | hypothetical protein CISIN_1g | not DE   | not DE   | not DE   | not DE  |
| EVM0016262 | LG8 | hypothetical protein CISIN_1g | not DE   | not DE   | not DE   | not DE  |
| EVM0010072 | LG8 | hypothetical protein CISIN_1g | not DE   | not DE   | not DE   | not DE  |
| EVM0005498 | LG8 | hypothetical protein CISIN_1g | not DE   | not DE   | not DE   | not DE  |
| EVM0000230 | LG8 | hypothetical protein CISIN_1g | not DE   | not DE   | not DE   | not DE  |
| EVM0012582 | LG8 | hypothetical protein CISIN_1g | not DE   | not DE   | not DE   | not DE  |
| EVM0020546 | LG8 | hypothetical protein CISIN_1g | not DE   | not DE   | not DE   | not DE  |
| EVM0010459 | LG8 | hypothetical protein CISIN_1g | not DE   | not DE   | not DE   | not DE  |
| EVM0013106 | LG8 | hypothetical protein CISIN_1g | not DE   | not DE   | not DE   | not DE  |
| EVM0017750 | LG8 | hypothetical protein CISIN_1g | not DE   | not DE   | not DE   | not DE  |
| EVM0014598 | LG8 | hypothetical protein CISIN_1g | not DE   | not DE   | not DE   | not DE  |
| EVM0007970 | LG8 | hypothetical protein CISIN_1g | not DE   | not DE   | not DE   | not DE  |
| EVM0008798 | LG8 | hypothetical protein CISIN_1g | not DE   | not DE   | not DE   | not DE  |
| EVM0020369 | LG8 | hypothetical protein CISIN_1g | not DE   | not DE   | not DE   | not DE  |
| EVM0012675 | LG8 | hypothetical protein CISIN_1g | not DE   | not DE   | not DE   | not DE  |
| EVM0024329 | LG8 | hypothetical protein CISIN_1g | 1.489454 | 0.025336 | 1.540228 | 0.01978 |
| EVM0024339 | LG8 | hypothetical protein CISIN_1g | not DE   | not DE   | not DE   | not DE  |
| EVM0010637 | LG8 | hypothetical protein CISIN_1g | not DE   | not DE   | not DE   | not DE  |
| EVM0005635 | LG8 | hypothetical protein CISIN_1g | not DE   | not DE   | not DE   | not DE  |
| EVM0012092 | LG8 | hypothetical protein CISIN_1g | not DE   | not DE   | not DE   | not DE  |
| EVM0018696 | LG8 | hypothetical protein CISIN_1g | not DE   | not DE   | not DE   | not DE  |
| EVM0020007 | LG8 | hypothetical protein CISIN_1g | not DE   | not DE   | not DE   | not DE  |
| EVM0022903 | LG8 | hypothetical protein CISIN_1g | not DE   | not DE   | not DE   | not DE  |
| EVM0006964 | LG8 | hypothetical protein CISIN_1g | not DE   | not DE   | not DE   | not DE  |
| EVM0001844 | LG8 | hypothetical protein CISIN_1g | not DE   | not DE   | not DE   | not DE  |
| EVM0018280 | LG8 | hypothetical protein CISIN_1g | not DE   | not DE   | not DE   | not DE  |



|            |     |                               |         |          |          |         |
|------------|-----|-------------------------------|---------|----------|----------|---------|
| EVM0007641 | LG8 | hypothetical protein CISIN_1g | not DE  | not DE   | not DE   | not DE  |
| EVM0008971 | LG8 | hypothetical protein CISIN_1g | not DE  | not DE   | not DE   | not DE  |
| EVM0010009 | LG8 | hypothetical protein CISIN_1g | not DE  | not DE   | not DE   | not DE  |
| EVM0007450 | LG8 | hypothetical protein CISIN_1g | not DE  | not DE   | not DE   | not DE  |
| EVM0013062 | LG8 | hypothetical protein CISIN_1g | not DE  | not DE   | not DE   | not DE  |
| EVM0019343 | LG8 | hypothetical protein CISIN_1g | not DE  | not DE   | not DE   | not DE  |
| EVM0001982 | LG8 | hypothetical protein CISIN_1g | not DE  | not DE   | not DE   | not DE  |
| EVM0001491 | LG8 | hypothetical protein CISIN_1g | not DE  | not DE   | not DE   | not DE  |
| EVM0011944 | LG8 | hypothetical protein CISIN_1g | 1.04234 | 0.003073 | not DE   | not DE  |
| EVM0014920 | LG8 | hypothetical protein CISIN_1g | not DE  | not DE   | not DE   | not DE  |
| EVM0002871 | LG8 | hypothetical protein CISIN_1g | not DE  | not DE   | not DE   | not DE  |
| EVM0016821 | LG8 | hypothetical protein CISIN_1g | not DE  | not DE   | not DE   | not DE  |
| EVM0022013 | LG8 | hypothetical protein CISIN_1g | not DE  | not DE   | not DE   | not DE  |
| EVM0021116 | LG8 | hypothetical protein CISIN_1g | not DE  | not DE   | not DE   | not DE  |
| EVM0009062 | LG8 | hypothetical protein CISIN_1g | not DE  | not DE   | not DE   | not DE  |
| EVM0008089 | LG8 | hypothetical protein CISIN_1g | not DE  | not DE   | not DE   | not DE  |
| EVM0013501 | LG8 | hypothetical protein CISIN_1g | not DE  | not DE   | not DE   | not DE  |
| EVM0016735 | LG8 | hypothetical protein CISIN_1g | not DE  | not DE   | not DE   | not DE  |
| EVM0005826 | LG8 | hypothetical protein CISIN_1g | not DE  | not DE   | not DE   | not DE  |
| EVM0008096 | LG8 | hypothetical protein CISIN_1g | not DE  | not DE   | not DE   | not DE  |
| EVM0003883 | LG8 | hypothetical protein CISIN_1g | not DE  | not DE   | not DE   | not DE  |
| EVM0009749 | LG8 | hypothetical protein CISIN_1g | not DE  | not DE   | not DE   | not DE  |
| EVM0010755 | LG8 | hypothetical protein CISIN_1g | not DE  | not DE   | not DE   | not DE  |
| EVM0011870 | LG8 | hypothetical protein CISIN_1g | not DE  | not DE   | not DE   | not DE  |
| EVM0023303 | LG8 | hypothetical protein CISIN_1g | not DE  | not DE   | not DE   | not DE  |
| EVM0000188 | LG8 | hypothetical protein CISIN_1g | not DE  | not DE   | not DE   | not DE  |
| EVM0016215 | LG8 | hypothetical protein CISIN_1g | not DE  | not DE   | not DE   | not DE  |
| EVM0018835 | LG8 | hypothetical protein CISIN_1g | not DE  | not DE   | not DE   | not DE  |
| EVM0007748 | LG8 | hypothetical protein CISIN_1g | not DE  | not DE   | not DE   | not DE  |
| EVM0023198 | LG8 | hypothetical protein CISIN_1g | not DE  | not DE   | not DE   | not DE  |
| EVM0009451 | LG8 | hypothetical protein CISIN_1g | not DE  | not DE   | not DE   | not DE  |
| EVM0020908 | LG8 | hypothetical protein CISIN_1g | not DE  | not DE   | not DE   | not DE  |
| EVM0012590 | LG8 | hypothetical protein CISIN_1g | not DE  | not DE   | not DE   | not DE  |
| EVM0004913 | LG8 | hypothetical protein CISIN_1g | not DE  | not DE   | not DE   | not DE  |
| EVM0006582 | LG8 | hypothetical protein CISIN_1g | not DE  | not DE   | not DE   | not DE  |
| EVM0021548 | LG8 | hypothetical protein CISIN_1g | not DE  | not DE   | not DE   | not DE  |
| EVM0023576 | LG8 | hypothetical protein CISIN_1g | not DE  | not DE   | not DE   | not DE  |
| EVM0020170 | LG8 | hypothetical protein CISIN_1g | not DE  | not DE   | not DE   | not DE  |
| EVM0011477 | LG8 | hypothetical protein CISIN_1g | not DE  | not DE   | not DE   | not DE  |
| EVM0006099 | LG8 | hypothetical protein CISIN_1g | not DE  | not DE   | not DE   | not DE  |
| EVM0013836 | LG8 | hypothetical protein CISIN_1g | not DE  | not DE   | not DE   | not DE  |
| EVM0002945 | LG8 | hypothetical protein CISIN_1g | not DE  | not DE   | not DE   | not DE  |
| EVM0011280 | LG8 | hypothetical protein CISIN_1g | not DE  | not DE   | not DE   | not DE  |
| EVM0012047 | LG8 | hypothetical protein CISIN_1g | not DE  | not DE   | not DE   | not DE  |
| EVM0019124 | LG8 | hypothetical protein CISIN_1g | not DE  | not DE   | not DE   | not DE  |
| EVM0016175 | LG8 | hypothetical protein CISIN_1g | not DE  | not DE   | not DE   | not DE  |
| EVM0006743 | LG8 | hypothetical protein CISIN_1g | not DE  | not DE   | not DE   | not DE  |
| EVM0003519 | LG8 | hypothetical protein CISIN_1g | not DE  | not DE   | not DE   | not DE  |
| EVM0018718 | LG8 | hypothetical protein CISIN_1g | not DE  | not DE   | not DE   | not DE  |
| EVM0003989 | LG8 | hypothetical protein CISIN_1g | not DE  | not DE   | not DE   | not DE  |
| EVM0005236 | LG8 | hypothetical protein CISIN_1g | not DE  | not DE   | not DE   | not DE  |
| EVM0018974 | LG8 | hypothetical protein CISIN_1g | not DE  | not DE   | 1.068185 | 0.0031  |
| EVM0006843 | LG8 | hypothetical protein CISIN_1g | not DE  | not DE   | 1.015186 | 0.02363 |
| EVM0009256 | LG8 | hypothetical protein CISIN_1g | not DE  | not DE   | not DE   | not DE  |

|            |     |                               |          |          |          |         |
|------------|-----|-------------------------------|----------|----------|----------|---------|
| EVM0007305 | LG8 | hypothetical protein CISIN_1g | not DE   | not DE   | not DE   | not DE  |
| EVM0012144 | LG8 | hypothetical protein CISIN_1g | not DE   | not DE   | not DE   | not DE  |
| EVM0019742 | LG8 | hypothetical protein CISIN_1g | not DE   | not DE   | not DE   | not DE  |
| EVM0005564 | LG8 | hypothetical protein CISIN_1g | not DE   | not DE   | not DE   | not DE  |
| EVM0015341 | LG8 | hypothetical protein CISIN_1g | not DE   | not DE   | not DE   | not DE  |
| EVM0006586 | LG8 | hypothetical protein CISIN_1g | not DE   | not DE   | not DE   | not DE  |
| EVM0008379 | LG8 | hypothetical protein CISIN_1g | not DE   | not DE   | not DE   | not DE  |
| EVM0009090 | LG8 | hypothetical protein CISIN_1g | not DE   | not DE   | not DE   | not DE  |
| EVM0020615 | LG8 | hypothetical protein CISIN_1g | not DE   | not DE   | not DE   | not DE  |
| EVM0000113 | LG8 | hypothetical protein CISIN_1g | not DE   | not DE   | not DE   | not DE  |
| EVM0020066 | LG8 | hypothetical protein CISIN_1g | not DE   | not DE   | not DE   | not DE  |
| EVM0007640 | LG8 | hypothetical protein CISIN_1g | 2.287315 | 0.004719 | not DE   | not DE  |
| EVM0023875 | LG8 | hypothetical protein CISIN_1g | not DE   | not DE   | not DE   | not DE  |
| EVM0015426 | LG8 | hypothetical protein CISIN_1g | not DE   | not DE   | not DE   | not DE  |
| EVM0001463 | LG8 | hypothetical protein CISIN_1g | not DE   | not DE   | not DE   | not DE  |
| EVM0023459 | LG8 | hypothetical protein CISIN_1g | not DE   | not DE   | not DE   | not DE  |
| EVM0024462 | LG8 | hypothetical protein CISIN_1g | not DE   | not DE   | not DE   | not DE  |
| EVM0004846 | LG8 | hypothetical protein CISIN_1g | not DE   | not DE   | not DE   | not DE  |
| EVM0023264 | LG8 | hypothetical protein CISIN_1g | not DE   | not DE   | not DE   | not DE  |
| EVM0007616 | LG8 | hypothetical protein CISIN_1g | not DE   | not DE   | not DE   | not DE  |
| EVM0010584 | LG8 | hypothetical protein CISIN_1g | not DE   | not DE   | not DE   | not DE  |
| EVM0007377 | LG8 | hypothetical protein CISIN_1g | not DE   | not DE   | 2.171594 | 0.00133 |
| EVM0019782 | LG8 | hypothetical protein CISIN_1g | not DE   | not DE   | not DE   | not DE  |
| EVM0010247 | LG8 | hypothetical protein CISIN_1g | not DE   | not DE   | not DE   | not DE  |
| EVM0002798 | LG8 | hypothetical protein CISIN_1g | not DE   | not DE   | not DE   | not DE  |
| EVM0017539 | LG8 | hypothetical protein CISIN_1g | 2.677736 | 0.043102 | not DE   | not DE  |
| EVM0022327 | LG8 | hypothetical protein CISIN_1g | not DE   | not DE   | not DE   | not DE  |
| EVM0021162 | LG8 | hypothetical protein CISIN_1g | not DE   | not DE   | not DE   | not DE  |
| EVM0018541 | LG8 | hypothetical protein CISIN_1g | not DE   | not DE   | not DE   | not DE  |
| EVM0004693 | LG8 | hypothetical protein CISIN_1g | not DE   | not DE   | not DE   | not DE  |
| EVM0021050 | LG8 | hypothetical protein CISIN_1g | not DE   | not DE   | not DE   | not DE  |
| EVM0009309 | LG8 | hypothetical protein CISIN_1g | not DE   | not DE   | not DE   | not DE  |
| EVM0023180 | LG8 | hypothetical protein CISIN_1g | 1.63733  | 0.002461 | 1.554857 | 0.01698 |
| EVM0003515 | LG8 | hypothetical protein CISIN_1g | not DE   | not DE   | not DE   | not DE  |
| EVM0017488 | LG8 | hypothetical protein CISIN_1g | not DE   | not DE   | not DE   | not DE  |
| EVM0018061 | LG8 | hypothetical protein CISIN_1g | not DE   | not DE   | not DE   | not DE  |
| EVM0019755 | LG8 | hypothetical protein CISIN_1g | not DE   | not DE   | not DE   | not DE  |
| EVM0013017 | LG8 | hypothetical protein CISIN_1g | not DE   | not DE   | not DE   | not DE  |
| EVM0009654 | LG8 | hypothetical protein CISIN_1g | not DE   | not DE   | not DE   | not DE  |
| EVM0003509 | LG8 | hypothetical protein CISIN_1g | not DE   | not DE   | not DE   | not DE  |
| EVM0004605 | LG8 | hypothetical protein CISIN_1g | not DE   | not DE   | not DE   | not DE  |
| EVM0006168 | LG8 | hypothetical protein CISIN_1g | not DE   | not DE   | not DE   | not DE  |
| EVM0022196 | LG8 | hypothetical protein CISIN_1g | not DE   | not DE   | not DE   | not DE  |
| EVM0000264 | LG8 | hypothetical protein CISIN_1g | not DE   | not DE   | not DE   | not DE  |
| EVM0015885 | LG8 | hypothetical protein CISIN_1g | not DE   | not DE   | not DE   | not DE  |
| EVM0009103 | LG8 | hypothetical protein CISIN_1g | not DE   | not DE   | not DE   | not DE  |
| EVM0013421 | LG8 | hypothetical protein CISIN_1g | not DE   | not DE   | not DE   | not DE  |
| EVM0005968 | LG8 | hypothetical protein CISIN_1g | not DE   | not DE   | not DE   | not DE  |
| EVM0024144 | LG8 | hypothetical protein CISIN_1g | not DE   | not DE   | not DE   | not DE  |
| EVM0013491 | LG8 | hypothetical protein CISIN_1g | not DE   | not DE   | not DE   | not DE  |
| EVM0006673 | LG8 | hypothetical protein CISIN_1g | not DE   | not DE   | not DE   | not DE  |
| EVM0018103 | LG8 | hypothetical protein CISIN_1g | not DE   | not DE   | not DE   | not DE  |
| EVM0023659 | LG8 | hypothetical protein CISIN_1g | not DE   | not DE   | not DE   | not DE  |
| EVM0015197 | LG8 | hypothetical protein CISIN_1g | not DE   | not DE   | not DE   | not DE  |

|            |     |                               |          |          |          |         |
|------------|-----|-------------------------------|----------|----------|----------|---------|
| EVM0015781 | LG8 | hypothetical protein CISIN_1g | not DE   | not DE   | not DE   | not DE  |
| EVM0014363 | LG8 | hypothetical protein CISIN_1g | not DE   | not DE   | not DE   | not DE  |
| EVM0021823 | LG8 | hypothetical protein CISIN_1g | not DE   | not DE   | 1.011563 | 0.00517 |
| EVM0006199 | LG8 | hypothetical protein CISIN_1g | -1.54063 | 3.96E-07 | not DE   | not DE  |
| EVM0007409 | LG8 | hypothetical protein CISIN_1g | not DE   | not DE   | not DE   | not DE  |
| EVM0020392 | LG8 | hypothetical protein CISIN_1g | not DE   | not DE   | not DE   | not DE  |
| EVM0014697 | LG8 | hypothetical protein CISIN_1g | not DE   | not DE   | not DE   | not DE  |
| EVM0016827 | LG8 | hypothetical protein CISIN_1g | not DE   | not DE   | not DE   | not DE  |
| EVM0020519 | LG8 | hypothetical protein EUGRSUZ_ | not DE   | not DE   | not DE   | not DE  |
| EVM0007328 | LG8 | hypothetical protein EUGRSUZ_ | not DE   | not DE   | not DE   | not DE  |
| EVM0008128 | LG8 | hypothetical protein EUGRSUZ_ | not DE   | not DE   | not DE   | not DE  |
| EVM0011538 | LG8 | hypothetical protein EUGRSUZ_ | not DE   | not DE   | 1.06459  | 0.03473 |
| EVM0013597 | LG8 | hypothetical protein EUGRSUZ_ | not DE   | not DE   | not DE   | not DE  |
| EVM0018254 | LG8 | hypothetical protein EUGRSUZ_ | not DE   | not DE   | 2.893575 | 0.03995 |
| EVM0022461 | LG8 | hypothetical protein EUGRSUZ_ | not DE   | not DE   | not DE   | not DE  |
| EVM0024017 | LG8 | hypothetical protein EUGRSUZ_ | not DE   | not DE   | 1.81622  | 0.02248 |
| EVM0015589 | LG8 | hypothetical protein EUGRSUZ_ | not DE   | not DE   | not DE   | not DE  |
| EVM0017659 | LG8 | hypothetical protein EUGRSUZ_ | not DE   | not DE   | not DE   | not DE  |
| EVM0017336 | LG8 | hypothetical protein EUTSA_v1 | not DE   | not DE   | not DE   | not DE  |
| EVM0000529 | LG8 | hypothetical protein F383_229 | not DE   | not DE   | not DE   | not DE  |
| EVM0015019 | LG8 | hypothetical protein F383_309 | not DE   | not DE   | not DE   | not DE  |
| EVM0007253 | LG8 | hypothetical protein JCGZ_018 | not DE   | not DE   | not DE   | not DE  |
| EVM0010402 | LG8 | hypothetical protein JCGZ_018 | not DE   | not DE   | -1.02879 | 0.00356 |
| EVM0014689 | LG8 | hypothetical protein JCGZ_030 | not DE   | not DE   | not DE   | not DE  |
| EVM0004748 | LG8 | hypothetical protein JCGZ_046 | not DE   | not DE   | not DE   | not DE  |
| EVM0002328 | LG8 | hypothetical protein JCGZ_047 | not DE   | not DE   | not DE   | not DE  |
| EVM0022822 | LG8 | hypothetical protein JCGZ_047 | -1.3638  | 0.008549 | not DE   | not DE  |
| EVM0016072 | LG8 | hypothetical protein JCGZ_047 | not DE   | not DE   | not DE   | not DE  |
| EVM0001855 | LG8 | hypothetical protein JCGZ_048 | not DE   | not DE   | not DE   | not DE  |
| EVM0007789 | LG8 | hypothetical protein JCGZ_048 | not DE   | not DE   | not DE   | not DE  |
| EVM0001906 | LG8 | hypothetical protein JCGZ_052 | 2.241055 | 0.006862 | not DE   | not DE  |
| EVM0002633 | LG8 | hypothetical protein JCGZ_052 | not DE   | not DE   | not DE   | not DE  |
| EVM0010694 | LG8 | hypothetical protein JCGZ_052 | not DE   | not DE   | not DE   | not DE  |
| EVM0012434 | LG8 | hypothetical protein JCGZ_092 | not DE   | not DE   | -1.31008 | #####   |
| EVM0022047 | LG8 | hypothetical protein JCGZ_092 | not DE   | not DE   | not DE   | not DE  |
| EVM0012094 | LG8 | hypothetical protein JCGZ_092 | not DE   | not DE   | not DE   | not DE  |
| EVM0013100 | LG8 | hypothetical protein JCGZ_093 | not DE   | not DE   | not DE   | not DE  |
| EVM0002777 | LG8 | hypothetical protein JCGZ_107 | not DE   | not DE   | not DE   | not DE  |
| EVM0006904 | LG8 | hypothetical protein JCGZ_121 | not DE   | not DE   | not DE   | not DE  |
| EVM0011790 | LG8 | hypothetical protein JCGZ_145 | not DE   | not DE   | not DE   | not DE  |
| EVM0007734 | LG8 | hypothetical protein JCGZ_156 | not DE   | not DE   | not DE   | not DE  |
| EVM0010661 | LG8 | hypothetical protein JCGZ_156 | not DE   | not DE   | not DE   | not DE  |
| EVM0005534 | LG8 | hypothetical protein JCGZ_156 | not DE   | not DE   | not DE   | not DE  |
| EVM0019446 | LG8 | hypothetical protein JCGZ_157 | not DE   | not DE   | not DE   | not DE  |
| EVM0015840 | LG8 | hypothetical protein JCGZ_167 | not DE   | not DE   | not DE   | not DE  |
| EVM0002073 | LG8 | hypothetical protein JCGZ_167 | not DE   | not DE   | not DE   | not DE  |
| EVM0014245 | LG8 | hypothetical protein JCGZ_167 | not DE   | not DE   | 1.510132 | #####   |
| EVM0005289 | LG8 | hypothetical protein JCGZ_168 | not DE   | not DE   | not DE   | not DE  |
| EVM0011903 | LG8 | hypothetical protein JCGZ_177 | not DE   | not DE   | not DE   | not DE  |
| EVM0010347 | LG8 | hypothetical protein JCGZ_178 | not DE   | not DE   | not DE   | not DE  |
| EVM0022887 | LG8 | hypothetical protein JCGZ_178 | not DE   | not DE   | not DE   | not DE  |
| EVM0002284 | LG8 | hypothetical protein JCGZ_179 | not DE   | not DE   | not DE   | not DE  |
| EVM0009359 | LG8 | hypothetical protein JCGZ_179 | not DE   | not DE   | not DE   | not DE  |
| EVM0016627 | LG8 | hypothetical protein JCGZ_179 | not DE   | not DE   | not DE   | not DE  |

|            |     |                               |          |          |          |         |
|------------|-----|-------------------------------|----------|----------|----------|---------|
| EVM0024255 | LG8 | hypothetical protein JCGZ_179 | not DE   | not DE   | not DE   | not DE  |
| EVM0006667 | LG8 | hypothetical protein JCGZ_182 | not DE   | not DE   | not DE   | not DE  |
| EVM0000546 | LG8 | hypothetical protein JCGZ_182 | -3.00515 | 0.000343 | not DE   | not DE  |
| EVM0005911 | LG8 | hypothetical protein JCGZ_183 | not DE   | not DE   | not DE   | not DE  |
| EVM0002365 | LG8 | hypothetical protein JCGZ_183 | not DE   | not DE   | not DE   | not DE  |
| EVM0015778 | LG8 | hypothetical protein JCGZ_183 | not DE   | not DE   | not DE   | not DE  |
| EVM0002962 | LG8 | hypothetical protein JCGZ_183 | not DE   | not DE   | not DE   | not DE  |
| EVM0003432 | LG8 | hypothetical protein JCGZ_183 | not DE   | not DE   | not DE   | not DE  |
| EVM0005164 | LG8 | hypothetical protein JCGZ_183 | 1.503254 | 0.045216 | not DE   | not DE  |
| EVM0017717 | LG8 | hypothetical protein JCGZ_216 | not DE   | not DE   | not DE   | not DE  |
| EVM0023431 | LG8 | hypothetical protein JCGZ_217 | not DE   | not DE   | not DE   | not DE  |
| EVM0024496 | LG8 | hypothetical protein JCGZ_217 | not DE   | not DE   | not DE   | not DE  |
| EVM0006018 | LG8 | hypothetical protein JCGZ_217 | not DE   | not DE   | not DE   | not DE  |
| EVM0004199 | LG8 | hypothetical protein JCGZ_217 | not DE   | not DE   | not DE   | not DE  |
| EVM0024259 | LG8 | hypothetical protein JCGZ_221 | not DE   | not DE   | not DE   | not DE  |
| EVM0010044 | LG8 | hypothetical protein JCGZ_231 | not DE   | not DE   | not DE   | not DE  |
| EVM0013217 | LG8 | hypothetical protein JCGZ_233 | not DE   | not DE   | not DE   | not DE  |
| EVM0002736 | LG8 | hypothetical protein JCGZ_244 | not DE   | not DE   | not DE   | not DE  |
| EVM0007975 | LG8 | hypothetical protein JCGZ_244 | not DE   | not DE   | not DE   | not DE  |
| EVM0014308 | LG8 | hypothetical protein JCGZ_244 | not DE   | not DE   | not DE   | not DE  |
| EVM0017551 | LG8 | hypothetical protein JCGZ_244 | 1.391198 | 0.024914 | not DE   | not DE  |
| EVM0018883 | LG8 | hypothetical protein L484_013 | not DE   | not DE   | not DE   | not DE  |
| EVM0001557 | LG8 | hypothetical protein L484_014 | not DE   | not DE   | not DE   | not DE  |
| EVM0023700 | LG8 | hypothetical protein L484_027 | not DE   | not DE   | not DE   | not DE  |
| EVM0022254 | LG8 | hypothetical protein L484_027 | not DE   | not DE   | not DE   | not DE  |
| EVM0019868 | LG8 | hypothetical protein MIMGU_mg | 1.474648 | 0.026012 | 1.428429 | 0.00016 |
| EVM0014513 | LG8 | hypothetical protein MIMGU_mg | not DE   | not DE   | not DE   | not DE  |
| EVM0011535 | LG8 | hypothetical protein PHAVU_00 | not DE   | not DE   | not DE   | not DE  |
| EVM0016795 | LG8 | hypothetical protein POPTR_00 | not DE   | not DE   | not DE   | not DE  |
| EVM0004354 | LG8 | hypothetical protein POPTR_00 | not DE   | not DE   | not DE   | not DE  |
| EVM0023153 | LG8 | hypothetical protein POPTR_00 | not DE   | not DE   | not DE   | not DE  |
| EVM0023406 | LG8 | hypothetical protein POPTR_00 | not DE   | not DE   | not DE   | not DE  |
| EVM0020733 | LG8 | hypothetical protein POPTR_00 | not DE   | not DE   | not DE   | not DE  |
| EVM0020880 | LG8 | hypothetical protein POPTR_00 | not DE   | not DE   | not DE   | not DE  |
| EVM0017416 | LG8 | hypothetical protein POPTR_00 | not DE   | not DE   | not DE   | not DE  |
| EVM0010113 | LG8 | hypothetical protein POPTR_00 | not DE   | not DE   | not DE   | not DE  |
| EVM0016630 | LG8 | hypothetical protein POPTR_00 | not DE   | not DE   | not DE   | not DE  |
| EVM0009048 | LG8 | hypothetical protein POPTR_00 | not DE   | not DE   | not DE   | not DE  |
| EVM0011200 | LG8 | hypothetical protein POPTR_00 | not DE   | not DE   | not DE   | not DE  |
| EVM0010507 | LG8 | hypothetical protein POPTR_00 | -5.96277 | 0.00325  | not DE   | not DE  |
| EVM0016679 | LG8 | hypothetical protein POPTR_00 | not DE   | not DE   | not DE   | not DE  |
| EVM0006035 | LG8 | hypothetical protein POPTR_00 | not DE   | not DE   | not DE   | not DE  |
| EVM0022658 | LG8 | hypothetical protein POPTR_00 | not DE   | not DE   | not DE   | not DE  |
| EVM0001827 | LG8 | hypothetical protein POPTR_00 | not DE   | not DE   | not DE   | not DE  |
| EVM0018657 | LG8 | hypothetical protein POPTR_00 | not DE   | not DE   | not DE   | not DE  |
| EVM0016898 | LG8 | hypothetical protein POPTR_00 | not DE   | not DE   | not DE   | not DE  |
| EVM0021202 | LG8 | hypothetical protein POPTR_00 | not DE   | not DE   | 5.489793 | 0.00341 |
| EVM0009431 | LG8 | hypothetical protein POPTR_00 | not DE   | not DE   | not DE   | not DE  |
| EVM0024315 | LG8 | hypothetical protein POPTR_00 | not DE   | not DE   | not DE   | not DE  |
| EVM0006687 | LG8 | hypothetical protein PRUPE_pp | not DE   | not DE   | not DE   | not DE  |
| EVM0020949 | LG8 | hypothetical protein PRUPE_pp | 1.768216 | 0.006282 | not DE   | not DE  |
| EVM0009290 | LG8 | hypothetical protein PRUPE_pp | not DE   | not DE   | not DE   | not DE  |
| EVM0019932 | LG8 | hypothetical protein PRUPE_pp | not DE   | not DE   | not DE   | not DE  |
| EVM0014222 | LG8 | hypothetical protein PRUPE_pp | not DE   | not DE   | not DE   | not DE  |

|            |     |                               |          |          |          |         |
|------------|-----|-------------------------------|----------|----------|----------|---------|
| EVM0007331 | LG8 | hypothetical protein PRUPE_pp | not DE   | not DE   | not DE   | not DE  |
| EVM0013713 | LG8 | hypothetical protein PRUPE_pp | not DE   | not DE   | not DE   | not DE  |
| EVM0005567 | LG8 | hypothetical protein PRUPE_pp | not DE   | not DE   | not DE   | not DE  |
| EVM0011037 | LG8 | hypothetical protein PRUPE_pp | not DE   | not DE   | not DE   | not DE  |
| EVM0006363 | LG8 | hypothetical protein PRUPE_pp | not DE   | not DE   | not DE   | not DE  |
| EVM0002074 | LG8 | hypothetical protein PRUPE_pp | 1.637727 | 0.029312 | not DE   | not DE  |
| EVM0017477 | LG8 | hypothetical protein PRUPE_pp | not DE   | not DE   | not DE   | not DE  |
| EVM0003620 | LG8 | hypothetical protein PRUPE_pp | -2.58053 | 0.043018 | not DE   | not DE  |
| EVM0010643 | LG8 | hypothetical protein PRUPE_pp | not DE   | not DE   | not DE   | not DE  |
| EVM0013545 | LG8 | hypothetical protein PRUPE_pp | not DE   | not DE   | not DE   | not DE  |
| EVM0014840 | LG8 | hypothetical protein PRUPE_pp | not DE   | not DE   | not DE   | not DE  |
| EVM0000190 | LG8 | hypothetical protein PRUPE_pp | not DE   | not DE   | not DE   | not DE  |
| EVM0003843 | LG8 | hypothetical protein PRUPE_pp | not DE   | not DE   | 2.149054 | #####   |
| EVM0006432 | LG8 | hypothetical protein PRUPE_pp | not DE   | not DE   | not DE   | not DE  |
| EVM0006767 | LG8 | hypothetical protein PRUPE_pp | not DE   | not DE   | not DE   | not DE  |
| EVM0008941 | LG8 | hypothetical protein PRUPE_pp | not DE   | not DE   | not DE   | not DE  |
| EVM0020507 | LG8 | hypothetical protein PRUPE_pp | not DE   | not DE   | not DE   | not DE  |
| EVM0019190 | LG8 | hypothetical protein PRUPE_pp | not DE   | not DE   | not DE   | not DE  |
| EVM0010851 | LG8 | hypothetical protein PRUPE_pp | not DE   | not DE   | not DE   | not DE  |
| EVM0011906 | LG8 | hypothetical protein PRUPE_pp | not DE   | not DE   | not DE   | not DE  |
| EVM0023528 | LG8 | hypothetical protein PRUPE_pp | not DE   | not DE   | not DE   | not DE  |
| EVM0024061 | LG8 | hypothetical protein VITISV_C | not DE   | not DE   | not DE   | not DE  |
| EVM0023631 | LG8 | hypothetical protein VITISV_C | not DE   | not DE   | not DE   | not DE  |
| EVM0012811 | LG8 | hypothetical protein VITISV_C | not DE   | not DE   | not DE   | not DE  |
| EVM0001201 | LG8 | hypothetical protein VITISV_C | not DE   | not DE   | not DE   | not DE  |
| EVM0000270 | LG8 | hypothetical protein VITISV_C | not DE   | not DE   | not DE   | not DE  |
| EVM0008587 | LG8 | hypothetical protein VITISV_C | not DE   | not DE   | not DE   | not DE  |
| EVM0001922 | LG8 | hypothetical protein VITISV_C | not DE   | not DE   | not DE   | not DE  |
| EVM0016866 | LG8 | hypothetical protein VITISV_C | not DE   | not DE   | not DE   | not DE  |
| EVM0006312 | LG8 | hypothetical protein VITISV_C | not DE   | not DE   | 1.574681 | 0.00668 |
| EVM0000241 | LG8 | hypothetical protein VITISV_C | not DE   | not DE   | not DE   | not DE  |
| EVM0003756 | LG8 | hypothetical protein VITISV_C | not DE   | not DE   | not DE   | not DE  |
| EVM0016383 | LG8 | hypothetical protein VITISV_C | not DE   | not DE   | not DE   | not DE  |
| EVM0005147 | LG8 | hypothetical protein VITISV_C | not DE   | not DE   | not DE   | not DE  |
| EVM0004661 | LG8 | kinase, putative              | not DE   | not DE   | not DE   | not DE  |
| EVM0015502 | LG8 | leucine-rich repeat containin | not DE   | not DE   | not DE   | not DE  |
| EVM0006909 | LG8 | orf101b (mitochondrion)       | not DE   | not DE   | not DE   | not DE  |
| EVM0021786 | LG8 | orf134 (mitochondrion)        | not DE   | not DE   | not DE   | not DE  |
| EVM0021975 | LG8 | polyamine oxidase, putative   | not DE   | not DE   | not DE   | not DE  |
| EVM0010017 | LG8 | predicted protein             | not DE   | not DE   | not DE   | not DE  |
| EVM0003287 | LG8 | putative calcium-binding prot | not DE   | not DE   | not DE   | not DE  |
| EVM0015239 | LG8 | putative small nuclear ribonu | not DE   | not DE   | not DE   | not DE  |
| EVM0023826 | LG8 | receptor protein kinase, puta | not DE   | not DE   | not DE   | not DE  |
| EVM0022570 | LG8 | remorin-4 protein             | not DE   | not DE   | not DE   | not DE  |
| EVM0001963 | LG8 | ribonuclease t2, putative     | not DE   | not DE   | not DE   | not DE  |
| EVM0011219 | LG8 | ribonuclease t2, putative     | not DE   | not DE   | not DE   | not DE  |
| EVM0019021 | LG8 | ribosomal protein L23 (chloro | not DE   | not DE   | not DE   | not DE  |
| EVM0007273 | LG8 | similar to the subtilase fami | not DE   | not DE   | not DE   | not DE  |
| EVM0020372 | LG8 | slx1                          | not DE   | not DE   | not DE   | not DE  |
| EVM0019601 | LG8 | sugar transporter, putative   | not DE   | not DE   | not DE   | not DE  |
| EVM0007717 | LG8 | sur2 hydroxylase/desaturase,  | not DE   | not DE   | not DE   | not DE  |
| EVM0022748 | LG8 | transcription factor, putativ | not DE   | not DE   | not DE   | not DE  |
| EVM0000173 | LG8 | translin-associated factor X  | not DE   | not DE   | not DE   | not DE  |
| EVM0010404 | LG8 | ubiquitin-conjugating enzyme  | not DE   | not DE   | not DE   | not DE  |

|            |     |                               |          |          |          |         |
|------------|-----|-------------------------------|----------|----------|----------|---------|
| EVM0000048 | LG8 | unknown protein               | not DE   | not DE   | not DE   | not DE  |
| EVM0000807 | LG8 | unknown protein               | not DE   | not DE   | not DE   | not DE  |
| EVM0001313 | LG8 | unknown protein               | not DE   | not DE   | not DE   | not DE  |
| EVM0002815 | LG8 | unknown protein               | not DE   | not DE   | 1.902548 | 0.0042  |
| EVM0002888 | LG8 | unknown protein               | not DE   | not DE   | not DE   | not DE  |
| EVM0003267 | LG8 | unknown protein               | not DE   | not DE   | not DE   | not DE  |
| EVM0003608 | LG8 | unknown protein               | not DE   | not DE   | not DE   | not DE  |
| EVM0006107 | LG8 | unknown protein               | not DE   | not DE   | not DE   | not DE  |
| EVM0007754 | LG8 | unknown protein               | not DE   | not DE   | not DE   | not DE  |
| EVM0008301 | LG8 | unknown protein               | not DE   | not DE   | not DE   | not DE  |
| EVM0008738 | LG8 | unknown protein               | not DE   | not DE   | not DE   | not DE  |
| EVM0010104 | LG8 | unknown protein               | not DE   | not DE   | not DE   | not DE  |
| EVM0010464 | LG8 | unknown protein               | not DE   | not DE   | not DE   | not DE  |
| EVM0011439 | LG8 | unknown protein               | not DE   | not DE   | not DE   | not DE  |
| EVM0013109 | LG8 | unknown protein               | 3.156393 | 8.64E-05 | not DE   | not DE  |
| EVM0013203 | LG8 | unknown protein               | not DE   | not DE   | not DE   | not DE  |
| EVM0017281 | LG8 | unknown protein               | not DE   | not DE   | not DE   | not DE  |
| EVM0017368 | LG8 | unknown protein               | not DE   | not DE   | not DE   | not DE  |
| EVM0018088 | LG8 | unknown protein               | not DE   | not DE   | not DE   | not DE  |
| EVM0020664 | LG8 | unknown protein               | not DE   | not DE   | not DE   | not DE  |
| EVM0022119 | LG8 | unknown protein               | not DE   | not DE   | not DE   | not DE  |
| EVM0022181 | LG8 | unknown protein               | not DE   | not DE   | not DE   | not DE  |
| EVM0024196 | LG8 | unknown protein               | not DE   | not DE   | not DE   | not DE  |
| EVM0002419 | LG8 | unnamed protein product       | 4.106944 | 0.004857 | not DE   | not DE  |
| EVM0002510 | LG8 | unnamed protein product       | not DE   | not DE   | not DE   | not DE  |
| EVM0002781 | LG8 | unnamed protein product       | not DE   | not DE   | not DE   | not DE  |
| EVM0003995 | LG8 | unnamed protein product       | not DE   | not DE   | not DE   | not DE  |
| EVM0004948 | LG8 | unnamed protein product       | not DE   | not DE   | not DE   | not DE  |
| EVM0005350 | LG8 | unnamed protein product       | not DE   | not DE   | not DE   | not DE  |
| EVM0007272 | LG8 | unnamed protein product       | not DE   | not DE   | 2.193092 | 0.00559 |
| EVM0008670 | LG8 | unnamed protein product       | not DE   | not DE   | not DE   | not DE  |
| EVM0009307 | LG8 | unnamed protein product       | not DE   | not DE   | not DE   | not DE  |
| EVM0013066 | LG8 | unnamed protein product       | not DE   | not DE   | not DE   | not DE  |
| EVM0014329 | LG8 | unnamed protein product       | not DE   | not DE   | not DE   | not DE  |
| EVM0014526 | LG8 | unnamed protein product       | not DE   | not DE   | not DE   | not DE  |
| EVM0015662 | LG8 | unnamed protein product       | not DE   | not DE   | not DE   | not DE  |
| EVM0016683 | LG8 | unnamed protein product       | not DE   | not DE   | not DE   | not DE  |
| EVM0018350 | LG8 | unnamed protein product       | not DE   | not DE   | not DE   | not DE  |
| EVM0018377 | LG8 | unnamed protein product       | not DE   | not DE   | not DE   | not DE  |
| EVM0020418 | LG8 | unnamed protein product       | not DE   | not DE   | not DE   | not DE  |
| EVM0020464 | LG8 | unnamed protein product       | not DE   | not DE   | not DE   | not DE  |
| EVM0021727 | LG8 | unnamed protein product       | not DE   | not DE   | not DE   | not DE  |
| EVM0022586 | LG8 | unnamed protein product       | not DE   | not DE   | not DE   | not DE  |
| EVM0022969 | LG8 | unnamed protein product       | not DE   | not DE   | not DE   | not DE  |
| EVM0023874 | LG8 | unnamed protein product       | not DE   | not DE   | not DE   | not DE  |
| EVM0024044 | LG8 | unnamed protein product       | not DE   | not DE   | not DE   | not DE  |
| EVM0001132 | LG8 | vacuolar protein sorting, put | not DE   | not DE   | not DE   | not DE  |
| EVM0005163 | LG8 | vacuolar protein sorting, put | not DE   | not DE   | not DE   | not DE  |
| EVM0014062 | LG8 | virion binding protein, putat | not DE   | not DE   | not DE   | not DE  |
| EVM0015241 | LG9 | (-)-germacrene D synthase-li  | not DE   | not DE   | not DE   | not DE  |
| EVM0008032 | LG9 | (R)-mandelonitrile lyase-lik  | not DE   | not DE   | not DE   | not DE  |
| EVM0018769 | LG9 | 1-aminocyclopropane-1-carbox  | not DE   | not DE   | not DE   | not DE  |
| EVM0012001 | LG9 | 1-phosphatidylinositol-3-pho  | not DE   | not DE   | not DE   | not DE  |
| EVM0000664 | LG9 | 2-methylbutanal oxime monoox  | not DE   | not DE   | not DE   | not DE  |

|            |     |                              |        |        |          |         |
|------------|-----|------------------------------|--------|--------|----------|---------|
| EVM0005145 | LG9 | 2-methylbutanal oxime monoox | not DE | not DE | not DE   | not DE  |
| EVM0016085 | LG9 | 2-methylbutanal oxime monoox | not DE | not DE | not DE   | not DE  |
| EVM0020183 | LG9 | 2-methylbutanal oxime monoox | not DE | not DE | not DE   | not DE  |
| EVM0012612 | LG9 | 2-oxoglutarate-dependent dic | not DE | not DE | not DE   | not DE  |
| EVM0019576 | LG9 | 26S protease regulatory subu | not DE | not DE | not DE   | not DE  |
| EVM0012669 | LG9 | 3-epi-6-deoxocathasterone 23 | not DE | not DE | not DE   | not DE  |
| EVM0005809 | LG9 | 40S ribosomal protein S12-li | not DE | not DE | not DE   | not DE  |
| EVM0023594 | LG9 | 54S ribosomal protein L39, m | not DE | not DE | not DE   | not DE  |
| EVM0015146 | LG9 | 60S ribosomal protein L18a-l | not DE | not DE | not DE   | not DE  |
| EVM0000612 | LG9 | 60S ribosomal protein L21-2- | not DE | not DE | not DE   | not DE  |
| EVM0010407 | LG9 | 60S ribosomal protein L21-2- | not DE | not DE | not DE   | not DE  |
| EVM0016501 | LG9 | 60S ribosomal protein L7-1-l | not DE | not DE | not DE   | not DE  |
| EVM0011527 | LG9 | ABC transporter C family mem | not DE | not DE | not DE   | not DE  |
| EVM0000779 | LG9 | ABC transporter C family mem | not DE | not DE | not DE   | not DE  |
| EVM0000269 | LG9 | AP2-like ethylene-responsive | not DE | not DE | not DE   | not DE  |
| EVM0016183 | LG9 | AP2-like ethylene-responsive | not DE | not DE | not DE   | not DE  |
| EVM0006237 | LG9 | ATP-dependent RNA helicase D | not DE | not DE | not DE   | not DE  |
| EVM0009786 | LG9 | ATPase 10, plasma membrane-t | not DE | not DE | not DE   | not DE  |
| EVM0010096 | LG9 | CBS domain-containing protei | not DE | not DE | not DE   | not DE  |
| EVM0013352 | LG9 | CBS domain-containing protei | not DE | not DE | not DE   | not DE  |
| EVM0023814 | LG9 | CBS domain-containing protei | not DE | not DE | not DE   | not DE  |
| EVM0014019 | LG9 | D-glycerate 3-kinase, chloro | not DE | not DE | not DE   | not DE  |
| EVM0024389 | LG9 | DEAD-box ATP-dependent RNA h | not DE | not DE | not DE   | not DE  |
| EVM0006724 | LG9 | DEAD-box ATP-dependent RNA h | not DE | not DE | not DE   | not DE  |
| EVM0007421 | LG9 | E3 ubiquitin-protein ligase  | not DE | not DE | not DE   | not DE  |
| EVM0009085 | LG9 | E3 ubiquitin-protein ligase  | not DE | not DE | not DE   | not DE  |
| EVM0019084 | LG9 | E3 ubiquitin-protein ligase  | not DE | not DE | not DE   | not DE  |
| EVM0012003 | LG9 | E3 ubiquitin-protein ligase  | not DE | not DE | not DE   | not DE  |
| EVM0008262 | LG9 | EG45-like domain containing  | not DE | not DE | not DE   | not DE  |
| EVM0007560 | LG9 | EPIDERMAL PATTERNING FACTOR- | not DE | not DE | not DE   | not DE  |
| EVM0024348 | LG9 | EPIDERMAL PATTERNING FACTOR- | not DE | not DE | not DE   | not DE  |
| EVM0003577 | LG9 | F-box/LRR-repeat protein At4 | not DE | not DE | not DE   | not DE  |
| EVM0022855 | LG9 | F-box/LRR-repeat protein At4 | not DE | not DE | not DE   | not DE  |
| EVM0022893 | LG9 | F-box/LRR-repeat protein At4 | not DE | not DE | not DE   | not DE  |
| EVM0019153 | LG9 | F-box/kelch-repeat protein A | not DE | not DE | not DE   | not DE  |
| EVM0016057 | LG9 | F-box/kelch-repeat protein A | not DE | not DE | -1.06409 | 0.00953 |
| EVM0011105 | LG9 | FK506-binding protein 5-like | not DE | not DE | 3.427148 | 0.00417 |
| EVM0011853 | LG9 | G-type lectin S-receptor-lik | not DE | not DE | not DE   | not DE  |
| EVM0018323 | LG9 | G-type lectin S-receptor-lik | not DE | not DE | not DE   | not DE  |
| EVM0011206 | LG9 | GATA transcription factor 12 | not DE | not DE | not DE   | not DE  |
| EVM0020311 | LG9 | GDSL esterase/lipase 5-like  | not DE | not DE | not DE   | not DE  |
| EVM0022554 | LG9 | GDSL esterase/lipase 5-like  | not DE | not DE | not DE   | not DE  |
| EVM0021729 | LG9 | GDSL esterase/lipase APG-lik | not DE | not DE | 1.211317 | #####   |
| EVM0020620 | LG9 | L-ascorbate oxidase homolog  | not DE | not DE | not DE   | not DE  |
| EVM0023218 | LG9 | L-type lectin-domain contain | not DE | not DE | not DE   | not DE  |
| EVM0013832 | LG9 | LOB domain-containing protei | not DE | not DE | not DE   | not DE  |
| EVM0002502 | LG9 | LOB domain-containing protei | not DE | not DE | not DE   | not DE  |
| EVM0020914 | LG9 | LOW QUALITY PROTEIN: SNF1-re | not DE | not DE | not DE   | not DE  |
| EVM0013752 | LG9 | LOW QUALITY PROTEIN: unchara | not DE | not DE | not DE   | not DE  |
| EVM0010447 | LG9 | MAR-binding filament-like pr | not DE | not DE | not DE   | not DE  |
| EVM0002969 | LG9 | MMS19 nucleotide excision re | not DE | not DE | not DE   | not DE  |
| EVM0002345 | LG9 | N-alpha-acetyltransferase 15 | not DE | not DE | not DE   | not DE  |
| EVM0011244 | LG9 | NAD(P)H-quinone oxidoreducta | not DE | not DE | not DE   | not DE  |
| EVM0004868 | LG9 | NADP-specific glutamate dehy | not DE | not DE | not DE   | not DE  |

|            |     |                              |          |          |          |         |
|------------|-----|------------------------------|----------|----------|----------|---------|
| EVM0015906 | LG9 | PHD finger protein ALFIN-LIK | not DE   | not DE   | not DE   | not DE  |
| EVM0011942 | LG9 | PRA1 family protein F3-like  | not DE   | not DE   | not DE   | not DE  |
| EVM0011372 | LG9 | PTI1-like tyrosine-protein k | not DE   | not DE   | not DE   | not DE  |
| EVM0004771 | LG9 | RANBP2-like and GRIP domain- | not DE   | not DE   | not DE   | not DE  |
| EVM0004702 | LG9 | RNA pseudouridine synthase 3 | not DE   | not DE   | not DE   | not DE  |
| EVM0004972 | LG9 | SKP1-like protein 1A         | not DE   | not DE   | not DE   | not DE  |
| EVM0020283 | LG9 | U-box domain-containing prot | not DE   | not DE   | not DE   | not DE  |
| EVM0003915 | LG9 | U-box domain-containing prot | not DE   | not DE   | not DE   | not DE  |
| EVM0004001 | LG9 | U-box domain-containing prot | not DE   | not DE   | not DE   | not DE  |
| EVM0001473 | LG9 | U-box domain-containing prot | not DE   | not DE   | not DE   | not DE  |
| EVM0003259 | LG9 | U-box domain-containing prot | not DE   | not DE   | not DE   | not DE  |
| EVM0021959 | LG9 | U2 small nuclear ribonucleop | not DE   | not DE   | not DE   | not DE  |
| EVM0003888 | LG9 | U2 small nuclear ribonucleop | not DE   | not DE   | not DE   | not DE  |
| EVM0006310 | LG9 | UDP-glycosyltransferase 85A2 | not DE   | not DE   | not DE   | not DE  |
| EVM0009032 | LG9 | UDP-glycosyltransferase 85A2 | not DE   | not DE   | not DE   | not DE  |
| EVM0013170 | LG9 | UDP-glycosyltransferase 85A2 | not DE   | not DE   | not DE   | not DE  |
| EVM0019593 | LG9 | UDP-glycosyltransferase 85A2 | not DE   | not DE   | not DE   | not DE  |
| EVM0024484 | LG9 | UDP-glycosyltransferase 85A2 | not DE   | not DE   | 4.141789 | #####   |
| EVM0017227 | LG9 | VHS domain-containing protei | not DE   | not DE   | not DE   | not DE  |
| EVM0001980 | LG9 | WD repeat-containing protein | 1.220902 | 0.00108  | not DE   | not DE  |
| EVM0022037 | LG9 | WD-40 repeat-containing prot | not DE   | not DE   | not DE   | not DE  |
| EVM0018736 | LG9 | Werner syndrome ATP-dependen | not DE   | not DE   | not DE   | not DE  |
| EVM0018494 | LG9 | abscisic acid receptor PYL2- | not DE   | not DE   | not DE   | not DE  |
| EVM0000530 | LG9 | agamous-like MADS-box protei | not DE   | not DE   | not DE   | not DE  |
| EVM0005902 | LG9 | agglutinin-like              | not DE   | not DE   | not DE   | not DE  |
| EVM0008181 | LG9 | alanine aminotransferase 2,  | 1.081652 | 0.015443 | not DE   | not DE  |
| EVM0022512 | LG9 | aminopeptidase M1-like isof  | not DE   | not DE   | not DE   | not DE  |
| EVM0008532 | LG9 | ankyrin repeat-containing pr | not DE   | not DE   | not DE   | not DE  |
| EVM0015868 | LG9 | ankyrin repeat-containing pr | not DE   | not DE   | not DE   | not DE  |
| EVM0021121 | LG9 | ankyrin repeat-containing pr | not DE   | not DE   | not DE   | not DE  |
| EVM0012931 | LG9 | ankyrin repeat-containing pr | not DE   | not DE   | not DE   | not DE  |
| EVM0010924 | LG9 | ankyrin repeat-containing pr | not DE   | not DE   | not DE   | not DE  |
| EVM0009380 | LG9 | aspartate carbamoyltransfera | not DE   | not DE   | not DE   | not DE  |
| EVM0017121 | LG9 | aspartate carbamoyltransfera | not DE   | not DE   | not DE   | not DE  |
| EVM0022617 | LG9 | auxin-repressed 12.5 kDa pro | not DE   | not DE   | not DE   | not DE  |
| EVM0001834 | LG9 | beta-amyrin synthase-like    | not DE   | not DE   | -2.61434 | 0.00059 |
| EVM0008343 | LG9 | beta-amyrin synthase-like    | not DE   | not DE   | not DE   | not DE  |
| EVM0013793 | LG9 | beta-amyrin synthase-like    | not DE   | not DE   | not DE   | not DE  |
| EVM0024187 | LG9 | beta-fructofuranosidase, ins | not DE   | not DE   | not DE   | not DE  |
| EVM0022830 | LG9 | bifunctional protein Fold 2- | not DE   | not DE   | not DE   | not DE  |
| EVM0016760 | LG9 | boron transporter 4-like     | not DE   | not DE   | 2.537791 | 0.01565 |
| EVM0016143 | LG9 | caffeoylshikimate esterase-l | not DE   | not DE   | not DE   | not DE  |
| EVM0007998 | LG9 | calcineurin B-like protein 9 | not DE   | not DE   | not DE   | not DE  |
| EVM0000099 | LG9 | casein kinase I isoform delt | not DE   | not DE   | not DE   | not DE  |
| EVM0020892 | LG9 | casein kinase I isoform delt | not DE   | not DE   | -2.02493 | #####   |
| EVM0019156 | LG9 | cation/H(+) antiporter 15-li | not DE   | not DE   | 2.60571  | #####   |
| EVM0007449 | LG9 | cation/calcium exchanger 4-l | not DE   | not DE   | not DE   | not DE  |
| EVM0018868 | LG9 | cation/calcium exchanger 4-l | not DE   | not DE   | not DE   | not DE  |
| EVM0023064 | LG9 | cationic peroxidase 1-like   | not DE   | not DE   | not DE   | not DE  |
| EVM0011269 | LG9 | coatomer subunit zeta-2-like | not DE   | not DE   | not DE   | not DE  |
| EVM0013095 | LG9 | coatomer subunit zeta-2-like | not DE   | not DE   | not DE   | not DE  |
| EVM0023163 | LG9 | coatomer subunit zeta-2-like | not DE   | not DE   | not DE   | not DE  |
| EVM0015777 | LG9 | codeine O-demethylase-like   | not DE   | not DE   | not DE   | not DE  |
| EVM0010964 | LG9 | coleoptile phototropism prot | not DE   | not DE   | not DE   | not DE  |



|            |     |                               |          |          |          |         |
|------------|-----|-------------------------------|----------|----------|----------|---------|
| EVM0014738 | LG9 | cytochrome P450 89A2-like     | not DE   | not DE   | not DE   | not DE  |
| EVM0000206 | LG9 | cytochrome c oxidase assembl  | not DE   | not DE   | not DE   | not DE  |
| EVM0014134 | LG9 | cytochrome c oxidase assembl  | -1.1715  | 0.036295 | not DE   | not DE  |
| EVM0017709 | LG9 | deSI-like protein At4gl7486   | not DE   | not DE   | not DE   | not DE  |
| EVM0005279 | LG9 | dentin sialophosphoprotein-l  | not DE   | not DE   | not DE   | not DE  |
| EVM0002583 | LG9 | disease resistance protein A  | not DE   | not DE   | not DE   | not DE  |
| EVM0008407 | LG9 | disease resistance protein A  | not DE   | not DE   | not DE   | not DE  |
| EVM0018656 | LG9 | disease resistance protein A  | not DE   | not DE   | not DE   | not DE  |
| EVM0018877 | LG9 | disease resistance protein A  | not DE   | not DE   | not DE   | not DE  |
| EVM0024459 | LG9 | disease resistance protein A  | not DE   | not DE   | not DE   | not DE  |
| EVM0000747 | LG9 | disease resistance protein R  | not DE   | not DE   | not DE   | not DE  |
| EVM0021444 | LG9 | dof zinc finger protein DOF3  | not DE   | not DE   | not DE   | not DE  |
| EVM0023356 | LG9 | ethylene-responsive transcri  | not DE   | not DE   | not DE   | not DE  |
| EVM0022247 | LG9 | ethylene-responsive transcri  | not DE   | not DE   | 1.875184 | 0.00483 |
| EVM0012100 | LG9 | eukaryotic initiation factor  | not DE   | not DE   | not DE   | not DE  |
| EVM0018995 | LG9 | eukaryotic initiation factor  | not DE   | not DE   | not DE   | not DE  |
| EVM0008535 | LG9 | eukaryotic translation initia | not DE   | not DE   | not DE   | not DE  |
| EVM0003366 | LG9 | exocyst complex component EX  | not DE   | not DE   | not DE   | not DE  |
| EVM0004398 | LG9 | exocyst complex component EX  | not DE   | not DE   | not DE   | not DE  |
| EVM0004708 | LG9 | exocyst complex component EX  | not DE   | not DE   | not DE   | not DE  |
| EVM0014088 | LG9 | expansin-A8                   | 3.978805 | 0.000579 | not DE   | not DE  |
| EVM0005594 | LG9 | exportin-T-like               | not DE   | not DE   | not DE   | not DE  |
| EVM0014153 | LG9 | fanconi-associated nuclease   | not DE   | not DE   | not DE   | not DE  |
| EVM0017535 | LG9 | formamidopyrimidine-DNA gly   | not DE   | not DE   | not DE   | not DE  |
| EVM0004476 | LG9 | glucan endo-1,3-beta-glucosi  | not DE   | not DE   | not DE   | not DE  |
| EVM0003742 | LG9 | glycerol kinase-like          | not DE   | not DE   | not DE   | not DE  |
| EVM0014950 | LG9 | golgin candidate 5-like       | not DE   | not DE   | not DE   | not DE  |
| EVM0021889 | LG9 | golgin candidate 5-like       | not DE   | not DE   | not DE   | not DE  |
| EVM0000707 | LG9 | heterogeneous nuclear ribonu  | not DE   | not DE   | not DE   | not DE  |
| EVM0019729 | LG9 | hexokinase-1-like             | not DE   | not DE   | not DE   | not DE  |
| EVM0007828 | LG9 | histidine-containing phospho  | not DE   | not DE   | not DE   | not DE  |
| EVM0018169 | LG9 | homeobox-leucine zipper prot  | not DE   | not DE   | not DE   | not DE  |
| EVM0011261 | LG9 | hydroxyphenylpyruvate reduct  | not DE   | not DE   | not DE   | not DE  |
| EVM0012619 | LG9 | inactive rhomboid protein 1-  | not DE   | not DE   | not DE   | not DE  |
| EVM0006576 | LG9 | insulin-degrading enzyme-lik  | not DE   | not DE   | not DE   | not DE  |
| EVM0009458 | LG9 | inter-alpha-trypsin inhibitor | not DE   | not DE   | not DE   | not DE  |
| EVM0016237 | LG9 | inter-alpha-trypsin inhibitor | not DE   | not DE   | not DE   | not DE  |
| EVM0011376 | LG9 | isoflavone reductase-like pr  | not DE   | not DE   | not DE   | not DE  |
| EVM0016026 | LG9 | kelch repeat-containing prot  | not DE   | not DE   | not DE   | not DE  |
| EVM0020584 | LG9 | late embryogenesis abundant   | not DE   | not DE   | not DE   | not DE  |
| EVM0016818 | LG9 | linoleate 13S-lipoxygenase 3  | not DE   | not DE   | not DE   | not DE  |
| EVM0011590 | LG9 | lysM domain receptor-like ki  | not DE   | not DE   | not DE   | not DE  |
| EVM0022972 | LG9 | magnesium transporter MRS2-1  | not DE   | not DE   | not DE   | not DE  |
| EVM0024073 | LG9 | mannose/glucose-specific lec  | not DE   | not DE   | not DE   | not DE  |
| EVM0008875 | LG9 | mannosyl-oligosaccharide 1,2  | not DE   | not DE   | not DE   | not DE  |
| EVM0017014 | LG9 | mediator of RNA polymerase I  | not DE   | not DE   | not DE   | not DE  |
| EVM0000879 | LG9 | metal tolerance protein C4-1  | not DE   | not DE   | not DE   | not DE  |
| EVM0022534 | LG9 | metal transporter Nramp1-lik  | not DE   | not DE   | -2.21537 | 0.0023  |
| EVM0003326 | LG9 | metallothiol transferase Fos  | 3.080852 | 0.033055 | not DE   | not DE  |
| EVM0003075 | LG9 | methyl-CpG-binding domain-co  | not DE   | not DE   | not DE   | not DE  |
| EVM0002573 | LG9 | methylesterase 17             | not DE   | not DE   | not DE   | not DE  |
| EVM0012073 | LG9 | methylesterase 17-like        | not DE   | not DE   | not DE   | not DE  |
| EVM0003855 | LG9 | methyltransferase-like prote  | not DE   | not DE   | not DE   | not DE  |
| EVM0018717 | LG9 | midasin-like isoform X7       | 1.051641 | 0.006576 | not DE   | not DE  |

|            |     |                                                              |          |          |          |         |
|------------|-----|--------------------------------------------------------------|----------|----------|----------|---------|
| EVM0009854 | LG9 | mitochondrial ubiquitin ligase                               | not DE   | not DE   | not DE   | not DE  |
| EVM0011687 | LG9 | mitochondrial ubiquitin ligase                               | not DE   | not DE   | not DE   | not DE  |
| EVM0015417 | LG9 | mitochondrial ubiquitin ligase                               | not DE   | not DE   | not DE   | not DE  |
| EVM0015493 | LG9 | mitochondrial-processing peptidase                           | not DE   | not DE   | not DE   | not DE  |
| EVM0015209 | LG9 | myosin-10-like                                               | not DE   | not DE   | not DE   | not DE  |
| EVM0010545 | LG9 | nucleolysin TIAR-like                                        | -3.73193 | 0.007939 | not DE   | not DE  |
| EVM0016163 | LG9 | nucleolysin TIAR-like                                        | not DE   | not DE   | not DE   | not DE  |
| EVM0019289 | LG9 | nucleolysin TIAR-like                                        | not DE   | not DE   | not DE   | not DE  |
| EVM0003412 | LG9 | nucleoporin NUP53-like                                       | not DE   | not DE   | not DE   | not DE  |
| EVM0001113 | LG9 | nucleosome assembly protein 1                                | not DE   | not DE   | not DE   | not DE  |
| EVM0024371 | LG9 | nucleosome assembly protein 1                                | not DE   | not DE   | not DE   | not DE  |
| EVM0023980 | LG9 | oligopeptide transporter 9-like                              | not DE   | not DE   | not DE   | not DE  |
| EVM0013497 | LG9 | palmitoyl-monogalactosyl diacylglycerol transferase          | not DE   | not DE   | not DE   | not DE  |
| EVM0011122 | LG9 | pentatricopeptide repeat-containing protein 1                | 2.418933 | 0.000495 | not DE   | not DE  |
| EVM0008214 | LG9 | pentatricopeptide repeat-containing protein 1                | not DE   | not DE   | not DE   | not DE  |
| EVM0022544 | LG9 | pentatricopeptide repeat-containing protein 1                | not DE   | not DE   | not DE   | not DE  |
| EVM0010453 | LG9 | pentatricopeptide repeat-containing protein 1                | not DE   | not DE   | not DE   | not DE  |
| EVM0010844 | LG9 | pentatricopeptide repeat-containing protein 1                | not DE   | not DE   | not DE   | not DE  |
| EVM0003145 | LG9 | pentatricopeptide repeat-containing protein 1                | not DE   | not DE   | not DE   | not DE  |
| EVM0018094 | LG9 | pentatricopeptide repeat-containing protein 1                | not DE   | not DE   | not DE   | not DE  |
| EVM0002803 | LG9 | periodic tryptophan protein                                  | not DE   | not DE   | -1.02506 | 0.00015 |
| EVM0001749 | LG9 | peroxidase 4-like                                            | not DE   | not DE   | not DE   | not DE  |
| EVM0005084 | LG9 | peroxidase E5-like                                           | not DE   | not DE   | not DE   | not DE  |
| EVM0012099 | LG9 | peroxidase E5-like                                           | not DE   | not DE   | not DE   | not DE  |
| EVM0019198 | LG9 | phospholipase D epsilon-like                                 | not DE   | not DE   | not DE   | not DE  |
| EVM0000309 | LG9 | plastidic ATP/ADP-transporter                                | not DE   | not DE   | not DE   | not DE  |
| EVM0006601 | LG9 | pleiotropic drug resistance 1                                | not DE   | not DE   | not DE   | not DE  |
| EVM0008817 | LG9 | poly(A) polymerase-like                                      | not DE   | not DE   | not DE   | not DE  |
| EVM0001436 | LG9 | probable 2-oxoglutarate-dependent methyltransferase          | not DE   | not DE   | not DE   | not DE  |
| EVM0004311 | LG9 | probable ATP-dependent RNA helicase                          | not DE   | not DE   | not DE   | not DE  |
| EVM0002126 | LG9 | probable CCR4-associated factor                              | not DE   | not DE   | not DE   | not DE  |
| EVM0009513 | LG9 | probable WRKY transcription factor                           | not DE   | not DE   | not DE   | not DE  |
| EVM0012900 | LG9 | probable disease resistance protein                          | not DE   | not DE   | not DE   | not DE  |
| EVM0016870 | LG9 | probable disease resistance protein                          | not DE   | not DE   | not DE   | not DE  |
| EVM0020351 | LG9 | probable disease resistance protein                          | not DE   | not DE   | not DE   | not DE  |
| EVM0004747 | LG9 | probable disease resistance protein                          | not DE   | not DE   | not DE   | not DE  |
| EVM0006335 | LG9 | probable disease resistance protein                          | not DE   | not DE   | not DE   | not DE  |
| EVM0007027 | LG9 | probable disease resistance protein                          | not DE   | not DE   | not DE   | not DE  |
| EVM0014244 | LG9 | probable disease resistance protein                          | not DE   | not DE   | not DE   | not DE  |
| EVM0019487 | LG9 | probable disease resistance protein                          | not DE   | not DE   | not DE   | not DE  |
| EVM0002329 | LG9 | probable glutathione S-transferase                           | not DE   | not DE   | not DE   | not DE  |
| EVM0012033 | LG9 | probable inactive 2-oxoglutarate-dependent methyltransferase | not DE   | not DE   | not DE   | not DE  |
| EVM0013107 | LG9 | probable inactive 2-oxoglutarate-dependent methyltransferase | not DE   | not DE   | not DE   | not DE  |
| EVM0021569 | LG9 | probable inactive 2-oxoglutarate-dependent methyltransferase | not DE   | not DE   | not DE   | not DE  |
| EVM0007390 | LG9 | probable inactive leucine-ribosyltransferase                 | not DE   | not DE   | not DE   | not DE  |
| EVM0012571 | LG9 | probable inactive leucine-ribosyltransferase                 | not DE   | not DE   | not DE   | not DE  |
| EVM0012173 | LG9 | probable nucleolar protein 5                                 | not DE   | not DE   | not DE   | not DE  |
| EVM0009648 | LG9 | probable peptide transporter                                 | 1.774668 | 0.006058 | not DE   | not DE  |
| EVM0023794 | LG9 | probable polygalacturonase A                                 | not DE   | not DE   | not DE   | not DE  |
| EVM0002950 | LG9 | probable pyridoxal biosynthesis protein                      | -3.58248 | 1.02E-21 | -1.28671 | #####   |
| EVM0007264 | LG9 | probable serine incorporator                                 | not DE   | not DE   | not DE   | not DE  |
| EVM0001105 | LG9 | probable sulfate transporter                                 | not DE   | not DE   | not DE   | not DE  |
| EVM0016253 | LG9 | probably inactive leucine-ribosyltransferase                 | not DE   | not DE   | not DE   | not DE  |
| EVM0022400 | LG9 | proteasome subunit alpha type 1                              | not DE   | not DE   | not DE   | not DE  |

|            |     |                                            |          |          |          |         |
|------------|-----|--------------------------------------------|----------|----------|----------|---------|
| EVM0024116 | LG9 | proteasome subunit alpha type 1            | not DE   | not DE   | not DE   | not DE  |
| EVM0015776 | LG9 | protein Brevis radix-like 2                | not DE   | not DE   | not DE   | not DE  |
| EVM0014880 | LG9 | protein EARLY FLOWERING 3-like 1           | not DE   | not DE   | not DE   | not DE  |
| EVM0019035 | LG9 | protein EARLY FLOWERING 3-like 2           | not DE   | not DE   | not DE   | not DE  |
| EVM0019595 | LG9 | protein FAR1-RELATED SEQUENCING 1          | not DE   | not DE   | not DE   | not DE  |
| EVM0018121 | LG9 | protein LOW PSII ACCUMULATION 1            | not DE   | not DE   | not DE   | not DE  |
| EVM0005703 | LG9 | protein LURP-one-related 12-like 1         | not DE   | not DE   | not DE   | not DE  |
| EVM0019246 | LG9 | protein LURP-one-related 12-like 2         | not DE   | not DE   | not DE   | not DE  |
| EVM0010636 | LG9 | protein RAE1                               | not DE   | not DE   | not DE   | not DE  |
| EVM0023313 | LG9 | protein TIC110, chloroplast import         | not DE   | not DE   | -1.08538 | 0.00038 |
| EVM0013290 | LG9 | protein TIFY 10A                           | not DE   | not DE   | not DE   | not DE  |
| EVM0012285 | LG9 | protein TOO MANY MOUTHS-like 1             | not DE   | not DE   | not DE   | not DE  |
| EVM0023013 | LG9 | protein disulfide isomerase 1              | not DE   | not DE   | not DE   | not DE  |
| EVM0003293 | LG9 | protein kinase PINOID 2                    | not DE   | not DE   | not DE   | not DE  |
| EVM0014820 | LG9 | protein kinase PINOID 2                    | not DE   | not DE   | not DE   | not DE  |
| EVM0015748 | LG9 | protein tesmin/TSO1-like CXC1              | not DE   | not DE   | not DE   | not DE  |
| EVM0010064 | LG9 | protein tesmin/TSO1-like CXC2              | not DE   | not DE   | not DE   | not DE  |
| EVM0020975 | LG9 | protein tesmin/TSO1-like CXC3              | not DE   | not DE   | not DE   | not DE  |
| EVM0002231 | LG9 | pumilio homolog 23-like isoform 1          | not DE   | not DE   | not DE   | not DE  |
| EVM0004716 | LG9 | putative F-box/LRR-repeat protein 1        | not DE   | not DE   | not DE   | not DE  |
| EVM0019873 | LG9 | putative Peroxidase 48-like 1              | not DE   | not DE   | not DE   | not DE  |
| EVM0014631 | LG9 | putative disease resistance protein 1      | not DE   | not DE   | not DE   | not DE  |
| EVM0003642 | LG9 | putative disease resistance protein 2      | not DE   | not DE   | not DE   | not DE  |
| EVM0009887 | LG9 | putative disease resistance protein 3      | not DE   | not DE   | not DE   | not DE  |
| EVM0010361 | LG9 | putative disease resistance protein 4      | not DE   | not DE   | not DE   | not DE  |
| EVM0010635 | LG9 | putative disease resistance protein 5      | 2.811636 | 0.000163 | 2.398899 | 0.01215 |
| EVM0006924 | LG9 | putative disease resistance protein 6      | not DE   | not DE   | not DE   | not DE  |
| EVM0010666 | LG9 | putative disease resistance protein 7      | not DE   | not DE   | not DE   | not DE  |
| EVM0015686 | LG9 | putative disease resistance protein 8      | not DE   | not DE   | not DE   | not DE  |
| EVM0021651 | LG9 | putative glucose-6-phosphate isomerase 1   | not DE   | not DE   | not DE   | not DE  |
| EVM0019301 | LG9 | putative leucine-rich repeat protein 1     | not DE   | not DE   | not DE   | not DE  |
| EVM0019981 | LG9 | putative leucine-rich repeat protein 2     | not DE   | not DE   | not DE   | not DE  |
| EVM0015010 | LG9 | putative pentatricopeptide repeat 1        | 2.045182 | 0.003952 | not DE   | not DE  |
| EVM0012488 | LG9 | putative phospholipid-transfer protein 1   | not DE   | not DE   | not DE   | not DE  |
| EVM0020796 | LG9 | putative phospholipid-transfer protein 2   | not DE   | not DE   | not DE   | not DE  |
| EVM0018071 | LG9 | pyrophosphate-energized membrane protein 1 | not DE   | not DE   | not DE   | not DE  |
| EVM0023967 | LG9 | receptor-like serine/threonine kinase 1    | not DE   | not DE   | not DE   | not DE  |
| EVM0010345 | LG9 | receptor-like serine/threonine kinase 2    | not DE   | not DE   | not DE   | not DE  |
| EVM0017202 | LG9 | receptor-like serine/threonine kinase 3    | not DE   | not DE   | not DE   | not DE  |
| EVM0022007 | LG9 | regulator of telomere elongation 1         | not DE   | not DE   | not DE   | not DE  |
| EVM0022894 | LG9 | regulator of telomere elongation 2         | not DE   | not DE   | not DE   | not DE  |
| EVM0010540 | LG9 | ribulose biphosphate carboxylase 1         | -1.03509 | 0.041946 | not DE   | not DE  |
| EVM0002287 | LG9 | rootletin-like protein 1                   | not DE   | not DE   | not DE   | not DE  |
| EVM0017851 | LG9 | serine-threonine kinase receptor 1         | not DE   | not DE   | not DE   | not DE  |
| EVM0012958 | LG9 | serine/threonine protein phosphatase 1     | not DE   | not DE   | not DE   | not DE  |
| EVM0022846 | LG9 | serine/threonine-protein phosphatase 2     | not DE   | not DE   | not DE   | not DE  |
| EVM0003270 | LG9 | tRNA (uracil-5-)-methyltransferase 1       | not DE   | not DE   | not DE   | not DE  |
| EVM0020157 | LG9 | tRNA (uracil-5-)-methyltransferase 2       | not DE   | not DE   | not DE   | not DE  |
| EVM0015547 | LG9 | thionin-like protein 2-like 1              | not DE   | not DE   | 2.234433 | 0.00334 |
| EVM0009511 | LG9 | threonine synthase, chloroplast            | not DE   | not DE   | not DE   | not DE  |
| EVM0009320 | LG9 | transcription factor RF2b-like 1           | not DE   | not DE   | not DE   | not DE  |
| EVM0021194 | LG9 | transcription factor RF2b-like 2           | not DE   | not DE   | not DE   | not DE  |
| EVM0016751 | LG9 | transcription factor bHLH87                | not DE   | not DE   | not DE   | not DE  |
| EVM0016561 | LG9 | transmembrane protein 56 isoform 1         | not DE   | not DE   | not DE   | not DE  |

|            |     |                              |          |          |          |         |
|------------|-----|------------------------------|----------|----------|----------|---------|
| EVM0009544 | LG9 | tubby-like protein 8-like is | not DE   | not DE   | not DE   | not DE  |
| EVM0000972 | LG9 | ubiquitin receptor RAD23b-li | not DE   | not DE   | not DE   | not DE  |
| EVM0012586 | LG9 | ubiquitin-conjugating enzyme | not DE   | not DE   | not DE   | not DE  |
| EVM0001961 | LG9 | ubiquitin-conjugating enzyme | not DE   | not DE   | not DE   | not DE  |
| EVM0018847 | LG9 | uncharacterized abhydrolase  | not DE   | not DE   | not DE   | not DE  |
| EVM0003301 | LG9 | uncharacterized membrane pro | not DE   | not DE   | not DE   | not DE  |
| EVM0021931 | LG9 | uncharacterized protein At1g | not DE   | not DE   | not DE   | not DE  |
| EVM0005187 | LG9 | uncharacterized protein At2g | not DE   | not DE   | not DE   | not DE  |
| EVM0021760 | LG9 | uncharacterized protein At4g | not DE   | not DE   | not DE   | not DE  |
| EVM0010114 | LG9 | uncharacterized protein LOC1 | not DE   | not DE   | not DE   | not DE  |
| EVM0000896 | LG9 | uncharacterized protein LOC1 | not DE   | not DE   | not DE   | not DE  |
| EVM0005693 | LG9 | uncharacterized protein LOC1 | not DE   | not DE   | not DE   | not DE  |
| EVM0006318 | LG9 | uncharacterized protein LOC1 | not DE   | not DE   | not DE   | not DE  |
| EVM0001504 | LG9 | uncharacterized protein LOC1 | not DE   | not DE   | not DE   | not DE  |
| EVM0012748 | LG9 | uncharacterized protein LOC1 | not DE   | not DE   | not DE   | not DE  |
| EVM0019912 | LG9 | uncharacterized protein LOC1 | not DE   | not DE   | not DE   | not DE  |
| EVM0018677 | LG9 | uncharacterized protein LOC1 | not DE   | not DE   | not DE   | not DE  |
| EVM0018819 | LG9 | uncharacterized protein LOC1 | not DE   | not DE   | not DE   | not DE  |
| EVM0014626 | LG9 | uncharacterized protein LOC1 | not DE   | not DE   | not DE   | not DE  |
| EVM0024305 | LG9 | uncharacterized protein LOC1 | not DE   | not DE   | not DE   | not DE  |
| EVM0021793 | LG9 | uncharacterized protein LOC1 | not DE   | not DE   | not DE   | not DE  |
| EVM0024280 | LG9 | uncharacterized protein LOC1 | not DE   | not DE   | not DE   | not DE  |
| EVM0006627 | LG9 | uncharacterized protein LOC1 | not DE   | not DE   | not DE   | not DE  |
| EVM0011691 | LG9 | uncharacterized protein LOC1 | not DE   | not DE   | not DE   | not DE  |
| EVM0003166 | LG9 | uncharacterized protein LOC1 | -1.4112  | 3.62E-06 | not DE   | not DE  |
| EVM0004724 | LG9 | uncharacterized protein LOC1 | not DE   | not DE   | not DE   | not DE  |
| EVM0002011 | LG9 | uncharacterized protein LOC1 | not DE   | not DE   | not DE   | not DE  |
| EVM0022127 | LG9 | uncharacterized protein LOC1 | not DE   | not DE   | not DE   | not DE  |
| EVM0002863 | LG9 | uncharacterized protein LOC1 | not DE   | not DE   | not DE   | not DE  |
| EVM0015864 | LG9 | uncharacterized protein LOC1 | not DE   | not DE   | not DE   | not DE  |
| EVM0021300 | LG9 | uncharacterized protein LOC1 | not DE   | not DE   | not DE   | not DE  |
| EVM0005347 | LG9 | uncharacterized protein LOC1 | not DE   | not DE   | not DE   | not DE  |
| EVM0006464 | LG9 | uncharacterized protein LOC1 | not DE   | not DE   | not DE   | not DE  |
| EVM0023404 | LG9 | uncharacterized protein LOC1 | not DE   | not DE   | not DE   | not DE  |
| EVM0001702 | LG9 | uncharacterized protein LOC1 | not DE   | not DE   | -1.05097 | #####   |
| EVM0015812 | LG9 | uncharacterized protein LOC1 | not DE   | not DE   | not DE   | not DE  |
| EVM0002144 | LG9 | uncharacterized protein LOC1 | -1.43645 | 0.004106 | 1.596691 | 0.01036 |
| EVM0008380 | LG9 | uncharacterized protein LOC1 | not DE   | not DE   | not DE   | not DE  |
| EVM0015583 | LG9 | uncharacterized protein LOC1 | not DE   | not DE   | not DE   | not DE  |
| EVM0022487 | LG9 | uncharacterized protein LOC1 | not DE   | not DE   | not DE   | not DE  |
| EVM0019101 | LG9 | uncharacterized protein LOC1 | not DE   | not DE   | not DE   | not DE  |
| EVM0017671 | LG9 | uncharacterized protein LOC1 | not DE   | not DE   | not DE   | not DE  |
| EVM0021767 | LG9 | uncharacterized protein LOC1 | not DE   | not DE   | not DE   | not DE  |
| EVM0022664 | LG9 | uncharacterized protein LOC1 | not DE   | not DE   | not DE   | not DE  |
| EVM0008508 | LG9 | uncharacterized protein LOC1 | not DE   | not DE   | not DE   | not DE  |
| EVM0016801 | LG9 | uncharacterized protein LOC1 | not DE   | not DE   | not DE   | not DE  |
| EVM0005935 | LG9 | uncharacterized protein LOC1 | not DE   | not DE   | not DE   | not DE  |
| EVM0011841 | LG9 | uncharacterized protein LOC1 | not DE   | not DE   | not DE   | not DE  |
| EVM0023110 | LG9 | uncharacterized protein LOC1 | not DE   | not DE   | not DE   | not DE  |
| EVM0014999 | LG9 | uncharacterized protein LOC1 | not DE   | not DE   | not DE   | not DE  |
| EVM0008253 | LG9 | uncharacterized protein LOC1 | not DE   | not DE   | not DE   | not DE  |
| EVM0022503 | LG9 | uncharacterized protein LOC1 | 1.550413 | 0.001401 | 2.157328 | #####   |
| EVM0014383 | LG9 | uncharacterized protein LOC1 | not DE   | not DE   | not DE   | not DE  |
| EVM0023329 | LG9 | uncharacterized protein LOC1 | not DE   | not DE   | not DE   | not DE  |



|            |     |                               |          |          |          |         |
|------------|-----|-------------------------------|----------|----------|----------|---------|
| EVM0023044 | LG9 | uncharacterized protein LOC1  | not DE   | not DE   | -3.16447 | 0.01544 |
| EVM0017625 | LG9 | uncharacterized protein LOC1  | not DE   | not DE   | not DE   | not DE  |
| EVM0017989 | LG9 | uncharacterized protein LOC1  | not DE   | not DE   | not DE   | not DE  |
| EVM0015273 | LG9 | uncharacterized protein LOC1  | not DE   | not DE   | not DE   | not DE  |
| EVM0016002 | LG9 | uncharacterized protein LOC1  | not DE   | not DE   | not DE   | not DE  |
| EVM0009598 | LG9 | uncharacterized protein LOC1  | not DE   | not DE   | not DE   | not DE  |
| EVM0011818 | LG9 | uncharacterized protein LOC1  | not DE   | not DE   | not DE   | not DE  |
| EVM0018074 | LG9 | uncharacterized protein LOC1  | not DE   | not DE   | not DE   | not DE  |
| EVM0023871 | LG9 | uncharacterized protein LOC1  | -1.23619 | 0.036295 | not DE   | not DE  |
| EVM0004267 | LG9 | uncharacterized protein LOC1  | not DE   | not DE   | not DE   | not DE  |
| EVM0011493 | LG9 | vacuolar-processing enzyme a  | not DE   | not DE   | not DE   | not DE  |
| EVM0023311 | LG9 | xylosyltransferase 1-like     | not DE   | not DE   | not DE   | not DE  |
| EVM0014973 | LG9 | zinc finger CCCH domain-cont  | not DE   | not DE   | not DE   | not DE  |
| EVM0011665 | LG9 | zinc phosphodiesterase ELAC   | not DE   | not DE   | not DE   | not DE  |
| EVM0001658 | LG9 | 4-coumarate:CoA ligase        | not DE   | not DE   | not DE   | not DE  |
| EVM0000976 | LG9 | 4-hydroxyphenylacetaldehyde c | not DE   | not DE   | not DE   | not DE  |
| EVM0020783 | LG9 | 4-hydroxyphenylacetaldehyde c | not DE   | not DE   | not DE   | not DE  |
| EVM0003095 | LG9 | 50S ribosomal protein L34     | not DE   | not DE   | not DE   | not DE  |
| EVM0018908 | LG9 | 60S ribosomal protein L15     | not DE   | not DE   | not DE   | not DE  |
| EVM0009198 | LG9 | 60S ribosomal protein L28-2   | not DE   | not DE   | not DE   | not DE  |
| EVM0002655 | LG9 | 60S ribosomal protein L32, pu | not DE   | not DE   | not DE   | not DE  |
| EVM0016569 | LG9 | 60S ribosomal protein L37, pu | not DE   | not DE   | not DE   | not DE  |
| EVM0019142 | LG9 | ABC-2 and Plant PDR ABC-type  | not DE   | not DE   | -2.36288 | 0.0066  |
| EVM0000813 | LG9 | ABC-2 type transporter family | not DE   | not DE   | not DE   | not DE  |
| EVM0022884 | LG9 | Actin binding family protein, | not DE   | not DE   | not DE   | not DE  |
| EVM0008136 | LG9 | Aldehyde dehydrogenase family | not DE   | not DE   | not DE   | not DE  |
| EVM0019948 | LG9 | Aldehyde dehydrogenase family | 2.104461 | 0.032636 | not DE   | not DE  |
| EVM0021033 | LG9 | Aldehyde dehydrogenase family | not DE   | not DE   | not DE   | not DE  |
| EVM0010089 | LG9 | Anthranilate N-benzoyltransfe | not DE   | not DE   | not DE   | not DE  |
| EVM0002640 | LG9 | Auxin-induced protein AUX22,  | not DE   | not DE   | not DE   | not DE  |
| EVM0007176 | LG9 | Auxin-induced protein AUX22,  | not DE   | not DE   | not DE   | not DE  |
| EVM0012756 | LG9 | Auxin-responsive protein IAA1 | not DE   | not DE   | not DE   | not DE  |
| EVM0020417 | LG9 | BRASSINOSTEROID INSENSITIVE 1 | not DE   | not DE   | not DE   | not DE  |
| EVM0002038 | LG9 | Basic helix-loop-helix DNA-bi | not DE   | not DE   | not DE   | not DE  |
| EVM0008910 | LG9 | Bet1-like protein             | not DE   | not DE   | not DE   | not DE  |
| EVM0012970 | LG9 | Bifunctional dihydroflavonol  | not DE   | not DE   | not DE   | not DE  |
| EVM0014638 | LG9 | CBL-interacting protein kinas | not DE   | not DE   | not DE   | not DE  |
| EVM0020957 | LG9 | CBL-interacting protein kinas | not DE   | not DE   | not DE   | not DE  |
| EVM0006483 | LG9 | CBL-interacting serine/threon | not DE   | not DE   | not DE   | not DE  |
| EVM0013955 | LG9 | COL domain class transcriptio | not DE   | not DE   | not DE   | not DE  |
| EVM0008258 | LG9 | CTC-interacting domain 3, put | not DE   | not DE   | not DE   | not DE  |
| EVM0012439 | LG9 | Cc-nbs-llr resistance protein | not DE   | not DE   | not DE   | not DE  |
| EVM0013834 | LG9 | Cc-nbs-llr resistance protein | not DE   | not DE   | not DE   | not DE  |
| EVM0008107 | LG9 | Cell division protein ftsH, p | not DE   | not DE   | not DE   | not DE  |
| EVM0008930 | LG9 | Cell division protein ftsH, p | not DE   | not DE   | not DE   | not DE  |
| EVM0009271 | LG9 | Chain A family protein        | not DE   | not DE   | not DE   | not DE  |
| EVM0015732 | LG9 | Chain A family protein        | not DE   | not DE   | not DE   | not DE  |
| EVM0015743 | LG9 | Chain A family protein        | not DE   | not DE   | not DE   | not DE  |
| EVM0023976 | LG9 | Coiled-coil domain-containing | not DE   | not DE   | not DE   | not DE  |
| EVM0020646 | LG9 | Cyclic nucleotide-gated ion c | not DE   | not DE   | not DE   | not DE  |
| EVM0002767 | LG9 | Cytochrome P450               | not DE   | not DE   | not DE   | not DE  |
| EVM0005307 | LG9 | Cytochrome P450               | not DE   | not DE   | not DE   | not DE  |
| EVM0005737 | LG9 | Cytochrome P450               | not DE   | not DE   | not DE   | not DE  |
| EVM0007481 | LG9 | Cytochrome P450               | not DE   | not DE   | not DE   | not DE  |

|            |     |                                       |          |          |          |         |
|------------|-----|---------------------------------------|----------|----------|----------|---------|
| EVM0011310 | LG9 | Cytochrome P450                       | not DE   | not DE   | not DE   | not DE  |
| EVM0012036 | LG9 | Cytochrome P450                       | not DE   | not DE   | -1.16089 | 0.02999 |
| EVM0016469 | LG9 | Cytochrome P450                       | not DE   | not DE   | not DE   | not DE  |
| EVM0018705 | LG9 | Cytochrome P450                       | not DE   | not DE   | not DE   | not DE  |
| EVM0022256 | LG9 | Cytochrome P450, family 706,          | not DE   | not DE   | not DE   | not DE  |
| EVM0023766 | LG9 | Cytochrome c oxidase subunit          | not DE   | not DE   | not DE   | not DE  |
| EVM0011231 | LG9 | DNA photolyase, putative              | not DE   | not DE   | not DE   | not DE  |
| EVM0000970 | LG9 | DNA-directed RNA polymerase I         | not DE   | not DE   | not DE   | not DE  |
| EVM0013529 | LG9 | DNAJ heat shock family protein        | not DE   | not DE   | not DE   | not DE  |
| EVM0001490 | LG9 | Domain of Uncharacterized protein     | not DE   | not DE   | not DE   | not DE  |
| EVM0002619 | LG9 | ELF4-like 4                           | not DE   | not DE   | not DE   | not DE  |
| EVM0024103 | LG9 | EXORDIUM like 1                       | not DE   | not DE   | not DE   | not DE  |
| EVM0019724 | LG9 | Extra-large GTP-binding protein       | not DE   | not DE   | not DE   | not DE  |
| EVM0020086 | LG9 | Extra-large GTP-binding protein       | not DE   | not DE   | not DE   | not DE  |
| EVM0006218 | LG9 | F-box family protein, putative        | not DE   | not DE   | not DE   | not DE  |
| EVM0005058 | LG9 | F11A6.1 protein, putative             | not DE   | not DE   | not DE   | not DE  |
| EVM0013294 | LG9 | F1504.13                              | not DE   | not DE   | not DE   | not DE  |
| EVM0019663 | LG9 | GDSL-motif lipase 5                   | not DE   | not DE   | not DE   | not DE  |
| EVM0005096 | LG9 | GDSL-motif lipase 7                   | not DE   | not DE   | not DE   | not DE  |
| EVM0005647 | LG9 | GDSL-motif lipase 7                   | not DE   | not DE   | not DE   | not DE  |
| EVM0006172 | LG9 | GDSL-motif lipase 7                   | not DE   | not DE   | not DE   | not DE  |
| EVM0012150 | LG9 | GDSL-motif lipase 7                   | not DE   | not DE   | not DE   | not DE  |
| EVM0015277 | LG9 | GDSL-motif lipase 7                   | not DE   | not DE   | not DE   | not DE  |
| EVM0017203 | LG9 | GDSL-motif lipase 7                   | not DE   | not DE   | not DE   | not DE  |
| EVM0018612 | LG9 | GDSL-motif lipase 7                   | not DE   | not DE   | not DE   | not DE  |
| EVM0022412 | LG9 | GDSL-motif lipase 7                   | not DE   | not DE   | not DE   | not DE  |
| EVM0015951 | LG9 | Gb:AAF36750.1, putative isoform       | not DE   | not DE   | not DE   | not DE  |
| EVM0011835 | LG9 | Gibberellin 3-beta-dioxygenase        | not DE   | not DE   | not DE   | not DE  |
| EVM0008423 | LG9 | Glucan endo-1,3-beta-glucosidase      | not DE   | not DE   | not DE   | not DE  |
| EVM0014566 | LG9 | Glycosyl hydrolases family 32         | not DE   | not DE   | not DE   | not DE  |
| EVM0015574 | LG9 | Glycosyl hydrolases family 32         | not DE   | not DE   | not DE   | not DE  |
| EVM0020702 | LG9 | Glycosyl hydrolases family 32         | not DE   | not DE   | not DE   | not DE  |
| EVM0024655 | LG9 | Golgi snare 11 isoform 1              | not DE   | not DE   | not DE   | not DE  |
| EVM0009637 | LG9 | Heat shock 70 kDa protein, putative   | -2.04203 | 1.97E-05 | -1.8062  | #####   |
| EVM0009125 | LG9 | Homeodomain-like/winged-helix         | not DE   | not DE   | not DE   | not DE  |
| EVM0012286 | LG9 | Homeodomain-like/winged-helix         | not DE   | not DE   | not DE   | not DE  |
| EVM0023610 | LG9 | Hydrophobic RCI2B -like protein       | not DE   | not DE   | not DE   | not DE  |
| EVM0021103 | LG9 | JHL07K02.8                            | not DE   | not DE   | not DE   | not DE  |
| EVM0011194 | LG9 | Kinase interacting family protein     | not DE   | not DE   | not DE   | not DE  |
| EVM0023636 | LG9 | Leucine-rich repeat protein kinase    | not DE   | not DE   | not DE   | not DE  |
| EVM0014810 | LG9 | MYB7                                  | not DE   | not DE   | not DE   | not DE  |
| EVM0017331 | LG9 | Major facilitator superfamily         | not DE   | not DE   | 2.249076 | 0.00293 |
| EVM0017032 | LG9 | Mannose/glucose-specific lectin       | not DE   | not DE   | not DE   | not DE  |
| EVM0020339 | LG9 | Mini-ribonuclease 3                   | not DE   | not DE   | not DE   | not DE  |
| EVM0020998 | LG9 | Mitochondrial carnitine/acylcarnitine | 2.273777 | 0.000562 | 1.200202 | 0.01141 |
| EVM0004112 | LG9 | Mono-/di-acylglycerol lipase          | not DE   | not DE   | not DE   | not DE  |
| EVM0003991 | LG9 | Monovalent cation:proton antiporter   | not DE   | not DE   | not DE   | not DE  |
| EVM0004532 | LG9 | Monovalent cation:proton antiporter   | not DE   | not DE   | not DE   | not DE  |
| EVM0021373 | LG9 | Monovalent cation:proton antiporter   | not DE   | not DE   | not DE   | not DE  |
| EVM0000131 | LG9 | NAC domain transcriptional repressor  | not DE   | not DE   | not DE   | not DE  |
| EVM0001937 | LG9 | NAC domain transcriptional repressor  | not DE   | not DE   | not DE   | not DE  |
| EVM0009278 | LG9 | NAC domain transcriptional repressor  | not DE   | not DE   | not DE   | not DE  |
| EVM0019468 | LG9 | NAC domain transcriptional repressor  | not DE   | not DE   | not DE   | not DE  |
| EVM0020700 | LG9 | NAC domain-containing 29 -like        | not DE   | not DE   | not DE   | not DE  |

|            |     |                                |          |          |          |         |
|------------|-----|--------------------------------|----------|----------|----------|---------|
| EVM0014844 | LG9 | NADP-dependent malic protein   | not DE   | not DE   | not DE   | not DE  |
| EVM0002181 | LG9 | NB-ARC domain-containing dis   | not DE   | not DE   | not DE   | not DE  |
| EVM0009181 | LG9 | NT domain of poly(A) polymera  | not DE   | not DE   | not DE   | not DE  |
| EVM0014499 | LG9 | Nodulin MtN21 /EamA-like tran  | not DE   | not DE   | not DE   | not DE  |
| EVM0001369 | LG9 | Non-specific lipid-transfer p  | 9.946596 | 6.48E-08 | not DE   | not DE  |
| EVM0017253 | LG9 | Non-specific lipid-transfer p  | not DE   | not DE   | not DE   | not DE  |
| EVM0024672 | LG9 | Non-specific lipid-transfer p  | 4.880674 | 0.013573 | not DE   | not DE  |
| EVM0017201 | LG9 | Ovate family protein 14, puta  | not DE   | not DE   | not DE   | not DE  |
| EVM0008205 | LG9 | Ovate family protein 4, putat  | not DE   | not DE   | not DE   | not DE  |
| EVM0017653 | LG9 | Oxidative stress 3, putative   | not DE   | not DE   | not DE   | not DE  |
| EVM0004717 | LG9 | PRA1 family protein            | not DE   | not DE   | not DE   | not DE  |
| EVM0000017 | LG9 | Peroxin 11A isoform 1          | not DE   | not DE   | not DE   | not DE  |
| EVM0012331 | LG9 | Pex2/Pex12 N-terminal domain   | not DE   | not DE   | not DE   | not DE  |
| EVM0006829 | LG9 | Phosphatase 2C family protein  | not DE   | not DE   | not DE   | not DE  |
| EVM0019578 | LG9 | Phosphatase 2C family protein  | not DE   | not DE   | not DE   | not DE  |
| EVM0003920 | LG9 | Phosphatidylinositol 3- and 4  | not DE   | not DE   | -1.29961 | 0.00019 |
| EVM0018445 | LG9 | Polyadenylate-binding 1-A      | not DE   | not DE   | not DE   | not DE  |
| EVM0007666 | LG9 | Prephenate dehydrogenase fami  | not DE   | not DE   | not DE   | not DE  |
| EVM0017687 | LG9 | Pyrophosphate-energized membr  | not DE   | not DE   | not DE   | not DE  |
| EVM0001838 | LG9 | Ras-related small GTP-binding  | not DE   | not DE   | not DE   | not DE  |
| EVM0008289 | LG9 | RecName: Full=Profilin; AltNa  | not DE   | not DE   | 1.159164 | 0.00622 |
| EVM0003482 | LG9 | Regulator of Vps4 activity in  | not DE   | not DE   | not DE   | not DE  |
| EVM0005127 | LG9 | Regulator of telomere elongat  | not DE   | not DE   | not DE   | not DE  |
| EVM0015145 | LG9 | Respiratory burst oxidase D    | not DE   | not DE   | not DE   | not DE  |
| EVM0016375 | LG9 | Respiratory burst oxidase D    | not DE   | not DE   | not DE   | not DE  |
| EVM0022779 | LG9 | Respiratory burst oxidase D    | not DE   | not DE   | not DE   | not DE  |
| EVM0000936 | LG9 | Ribosomal protein S5/Elongati  | not DE   | not DE   | not DE   | not DE  |
| EVM0005688 | LG9 | S-adenosyl-L-methionine-deper  | not DE   | not DE   | not DE   | not DE  |
| EVM0011936 | LG9 | SAUR-like auxin-responsive pr  | not DE   | not DE   | not DE   | not DE  |
| EVM0019045 | LG9 | Senescence-associated gene 21  | not DE   | not DE   | not DE   | not DE  |
| EVM0020575 | LG9 | Signal peptidase complex cata  | not DE   | not DE   | not DE   | not DE  |
| EVM0001237 | LG9 | Splicing factor 3B subunit 4   | not DE   | not DE   | not DE   | not DE  |
| EVM0021341 | LG9 | Structural molecules           | not DE   | not DE   | not DE   | not DE  |
| EVM0011106 | LG9 | Subtilisin-like protease       | not DE   | not DE   | not DE   | not DE  |
| EVM0024139 | LG9 | Sulfate transmembrane transpo  | -1.40224 | 0.04472  | not DE   | not DE  |
| EVM0009532 | LG9 | Target SNARE coiled-coil doma  | not DE   | not DE   | not DE   | not DE  |
| EVM0008635 | LG9 | Translation machinery-associat | not DE   | not DE   | not DE   | not DE  |
| EVM0007179 | LG9 | Triacylglycerol lipase, putat  | not DE   | not DE   | not DE   | not DE  |
| EVM0009238 | LG9 | Tyrosine N-monooxygenase       | not DE   | not DE   | not DE   | not DE  |
| EVM0010653 | LG9 | Tyrosine N-monooxygenase       | not DE   | not DE   | not DE   | not DE  |
| EVM0022300 | LG9 | Tyrosine N-monooxygenase       | not DE   | not DE   | not DE   | not DE  |
| EVM0000054 | LG9 | Tyrosine/DOPA decarboxylase    | not DE   | not DE   | not DE   | not DE  |
| EVM0000687 | LG9 | Uncharacterized protein TCM_C  | not DE   | not DE   | not DE   | not DE  |
| EVM0017886 | LG9 | Uncharacterized protein TCM_C  | not DE   | not DE   | -1.62655 | 0.03078 |
| EVM0005684 | LG9 | Uncharacterized protein TCM_C  | not DE   | not DE   | not DE   | not DE  |
| EVM0013591 | LG9 | Uncharacterized protein TCM_C  | not DE   | not DE   | not DE   | not DE  |
| EVM0003243 | LG9 | Uncharacterized protein TCM_C  | not DE   | not DE   | not DE   | not DE  |
| EVM0000531 | LG9 | Uncharacterized protein TCM_C  | not DE   | not DE   | not DE   | not DE  |
| EVM0010377 | LG9 | Uncharacterized protein TCM_C  | not DE   | not DE   | not DE   | not DE  |
| EVM0013013 | LG9 | Uncharacterized protein TCM_C  | not DE   | not DE   | not DE   | not DE  |
| EVM0013527 | LG9 | Uncharacterized protein TCM_C  | not DE   | not DE   | not DE   | not DE  |
| EVM0022027 | LG9 | Uncharacterized protein TCM_C  | not DE   | not DE   | not DE   | not DE  |
| EVM0009175 | LG9 | Uncharacterized protein TCM_C  | not DE   | not DE   | not DE   | not DE  |
| EVM0002077 | LG9 | Uncharacterized protein isofc  | not DE   | not DE   | not DE   | not DE  |



|            |     |                                |          |          |          |        |
|------------|-----|--------------------------------|----------|----------|----------|--------|
| EVM0007777 | LG9 | Uncharacterized protein isofo  | not DE   | not DE   | not DE   | not DE |
| EVM0011747 | LG9 | Uncharacterized protein isofo  | not DE   | not DE   | not DE   | not DE |
| EVM0000221 | LG9 | Uncharacterized protein isofo  | -1.21021 | 0.006964 | not DE   | not DE |
| EVM0019756 | LG9 | V-type proton ATPase catalyti  | not DE   | not DE   | not DE   | not DE |
| EVM0021601 | LG9 | WRKY transcription factor 5    | not DE   | not DE   | not DE   | not DE |
| EVM0019655 | LG9 | alcohol dehydrogenase, putati  | 8.152071 | 4.59E-08 | not DE   | not DE |
| EVM0022665 | LG9 | alcohol dehydrogenase, putati  | 10.37828 | 4.36E-12 | not DE   | not DE |
| EVM0015410 | LG9 | ccr4-associated factor, putat  | not DE   | not DE   | not DE   | not DE |
| EVM0001621 | LG9 | conserved hypothetical protei  | not DE   | not DE   | not DE   | not DE |
| EVM0003483 | LG9 | conserved hypothetical protei  | not DE   | not DE   | not DE   | not DE |
| EVM0004063 | LG9 | conserved hypothetical protei  | not DE   | not DE   | not DE   | not DE |
| EVM0006712 | LG9 | conserved hypothetical protei  | not DE   | not DE   | not DE   | not DE |
| EVM0007395 | LG9 | conserved hypothetical protei  | not DE   | not DE   | not DE   | not DE |
| EVM0007499 | LG9 | conserved hypothetical protei  | not DE   | not DE   | not DE   | not DE |
| EVM0008241 | LG9 | conserved hypothetical protei  | not DE   | not DE   | not DE   | not DE |
| EVM0008384 | LG9 | conserved hypothetical protei  | not DE   | not DE   | not DE   | not DE |
| EVM0009850 | LG9 | conserved hypothetical protei  | not DE   | not DE   | not DE   | not DE |
| EVM0010487 | LG9 | conserved hypothetical protei  | not DE   | not DE   | not DE   | not DE |
| EVM0013532 | LG9 | conserved hypothetical protei  | not DE   | not DE   | not DE   | not DE |
| EVM0015879 | LG9 | conserved hypothetical protei  | not DE   | not DE   | not DE   | not DE |
| EVM0024376 | LG9 | conserved hypothetical protei  | not DE   | not DE   | not DE   | not DE |
| EVM0017755 | LG9 | copine, putative               | not DE   | not DE   | not DE   | not DE |
| EVM0002330 | LG9 | cytochrome P450                | not DE   | not DE   | not DE   | not DE |
| EVM0002326 | LG9 | cytochrome P450, putative      | not DE   | not DE   | not DE   | not DE |
| EVM0016028 | LG9 | cytoplasmic dynein light chain | not DE   | not DE   | 1.962414 | #####  |
| EVM0007354 | LG9 | gag-pol polyprotein            | not DE   | not DE   | not DE   | not DE |
| EVM0022700 | LG9 | gag-pol polyprotein            | not DE   | not DE   | not DE   | not DE |
| EVM0020055 | LG9 | histidine phosphotransfer pro  | -2.78523 | 0.038874 | not DE   | not DE |
| EVM0013155 | LG9 | histone h2a, putative          | not DE   | not DE   | not DE   | not DE |
| EVM0023908 | LG9 | hypothetical protein AALP_AA4  | not DE   | not DE   | not DE   | not DE |
| EVM0011859 | LG9 | hypothetical protein AMTR_s04  | not DE   | not DE   | not DE   | not DE |
| EVM0009338 | LG9 | hypothetical protein ARALYDRA  | not DE   | not DE   | not DE   | not DE |
| EVM0021354 | LG9 | hypothetical protein CICLE_vl  | not DE   | not DE   | not DE   | not DE |
| EVM0005814 | LG9 | hypothetical protein CICLE_vl  | not DE   | not DE   | not DE   | not DE |
| EVM0016685 | LG9 | hypothetical protein CICLE_vl  | 1.139604 | 9.85E-07 | not DE   | not DE |
| EVM0022723 | LG9 | hypothetical protein CICLE_vl  | not DE   | not DE   | not DE   | not DE |
| EVM0022785 | LG9 | hypothetical protein CICLE_vl  | not DE   | not DE   | not DE   | not DE |
| EVM0016816 | LG9 | hypothetical protein CICLE_vl  | not DE   | not DE   | not DE   | not DE |
| EVM0007180 | LG9 | hypothetical protein CICLE_vl  | not DE   | not DE   | not DE   | not DE |
| EVM0022087 | LG9 | hypothetical protein CICLE_vl  | not DE   | not DE   | not DE   | not DE |
| EVM0024471 | LG9 | hypothetical protein CICLE_vl  | not DE   | not DE   | not DE   | not DE |
| EVM0001607 | LG9 | hypothetical protein CICLE_vl  | not DE   | not DE   | not DE   | not DE |
| EVM0018356 | LG9 | hypothetical protein CICLE_vl  | not DE   | not DE   | not DE   | not DE |
| EVM0011340 | LG9 | hypothetical protein CICLE_vl  | not DE   | not DE   | not DE   | not DE |
| EVM0005719 | LG9 | hypothetical protein CICLE_vl  | not DE   | not DE   | not DE   | not DE |
| EVM0023463 | LG9 | hypothetical protein CICLE_vl  | 1.5451   | 0.030377 | not DE   | not DE |
| EVM0023357 | LG9 | hypothetical protein CICLE_vl  | not DE   | not DE   | not DE   | not DE |
| EVM0008417 | LG9 | hypothetical protein CICLE_vl  | not DE   | not DE   | not DE   | not DE |
| EVM0012198 | LG9 | hypothetical protein CICLE_vl  | not DE   | not DE   | not DE   | not DE |
| EVM0014772 | LG9 | hypothetical protein CICLE_vl  | not DE   | not DE   | not DE   | not DE |
| EVM0001480 | LG9 | hypothetical protein CICLE_vl  | not DE   | not DE   | not DE   | not DE |
| EVM0006315 | LG9 | hypothetical protein CICLE_vl  | not DE   | not DE   | not DE   | not DE |
| EVM0019075 | LG9 | hypothetical protein CICLE_vl  | not DE   | not DE   | not DE   | not DE |
| EVM0000276 | LG9 | hypothetical protein CICLE_vl  | not DE   | not DE   | not DE   | not DE |

|            |     |                               |          |          |          |         |
|------------|-----|-------------------------------|----------|----------|----------|---------|
| EVM0013452 | LG9 | hypothetical protein CICLE_v1 | not DE   | not DE   | not DE   | not DE  |
| EVM0015972 | LG9 | hypothetical protein CICLE_v1 | not DE   | not DE   | -1.11084 | 0.00043 |
| EVM0002341 | LG9 | hypothetical protein CICLE_v1 | not DE   | not DE   | not DE   | not DE  |
| EVM0003363 | LG9 | hypothetical protein CICLE_v1 | not DE   | not DE   | not DE   | not DE  |
| EVM0003165 | LG9 | hypothetical protein CICLE_v1 | -3.25613 | 0.042932 | not DE   | not DE  |
| EVM0005391 | LG9 | hypothetical protein CICLE_v1 | not DE   | not DE   | not DE   | not DE  |
| EVM0018919 | LG9 | hypothetical protein CICLE_v1 | not DE   | not DE   | not DE   | not DE  |
| EVM0003897 | LG9 | hypothetical protein CICLE_v1 | not DE   | not DE   | not DE   | not DE  |
| EVM0001169 | LG9 | hypothetical protein CICLE_v1 | not DE   | not DE   | not DE   | not DE  |
| EVM0017994 | LG9 | hypothetical protein CICLE_v1 | not DE   | not DE   | not DE   | not DE  |
| EVM0002154 | LG9 | hypothetical protein CICLE_v1 | not DE   | not DE   | not DE   | not DE  |
| EVM0004852 | LG9 | hypothetical protein CICLE_v1 | -1.03837 | 0.002171 | not DE   | not DE  |
| EVM0001097 | LG9 | hypothetical protein CICLE_v1 | not DE   | not DE   | not DE   | not DE  |
| EVM0009808 | LG9 | hypothetical protein CICLE_v1 | 1.276976 | 0.000421 | not DE   | not DE  |
| EVM0001213 | LG9 | hypothetical protein CICLE_v1 | not DE   | not DE   | not DE   | not DE  |
| EVM0009008 | LG9 | hypothetical protein CICLE_v1 | not DE   | not DE   | not DE   | not DE  |
| EVM0008474 | LG9 | hypothetical protein CICLE_v1 | not DE   | not DE   | -1.46056 | #####   |
| EVM0009392 | LG9 | hypothetical protein CICLE_v1 | not DE   | not DE   | not DE   | not DE  |
| EVM0013618 | LG9 | hypothetical protein CICLE_v1 | not DE   | not DE   | not DE   | not DE  |
| EVM0006540 | LG9 | hypothetical protein CICLE_v1 | not DE   | not DE   | -1.04524 | #####   |
| EVM0004756 | LG9 | hypothetical protein CICLE_v1 | not DE   | not DE   | not DE   | not DE  |
| EVM0017343 | LG9 | hypothetical protein CICLE_v1 | not DE   | not DE   | not DE   | not DE  |
| EVM0010729 | LG9 | hypothetical protein CICLE_v1 | not DE   | not DE   | not DE   | not DE  |
| EVM0013658 | LG9 | hypothetical protein CICLE_v1 | not DE   | not DE   | not DE   | not DE  |
| EVM0023321 | LG9 | hypothetical protein CICLE_v1 | not DE   | not DE   | not DE   | not DE  |
| EVM0001397 | LG9 | hypothetical protein CICLE_v1 | not DE   | not DE   | not DE   | not DE  |
| EVM0018829 | LG9 | hypothetical protein CICLE_v1 | not DE   | not DE   | not DE   | not DE  |
| EVM0024641 | LG9 | hypothetical protein CICLE_v1 | not DE   | not DE   | not DE   | not DE  |
| EVM0015021 | LG9 | hypothetical protein CICLE_v1 | not DE   | not DE   | not DE   | not DE  |
| EVM0021250 | LG9 | hypothetical protein CICLE_v1 | not DE   | not DE   | not DE   | not DE  |
| EVM0005699 | LG9 | hypothetical protein CICLE_v1 | 2.472966 | 3.71E-06 | not DE   | not DE  |
| EVM0003740 | LG9 | hypothetical protein CICLE_v1 | 1.873474 | 0.007474 | not DE   | not DE  |
| EVM0008127 | LG9 | hypothetical protein CICLE_v1 | not DE   | not DE   | -1.029   | 0.00099 |
| EVM0015689 | LG9 | hypothetical protein CICLE_v1 | not DE   | not DE   | not DE   | not DE  |
| EVM0012610 | LG9 | hypothetical protein CICLE_v1 | 1.312696 | 0.00289  | not DE   | not DE  |
| EVM0015459 | LG9 | hypothetical protein CICLE_v1 | not DE   | not DE   | not DE   | not DE  |
| EVM0017722 | LG9 | hypothetical protein CICLE_v1 | not DE   | not DE   | not DE   | not DE  |
| EVM0006692 | LG9 | hypothetical protein CICLE_v1 | not DE   | not DE   | not DE   | not DE  |
| EVM0015049 | LG9 | hypothetical protein CICLE_v1 | not DE   | not DE   | -3.31633 | 0.02426 |
| EVM0021312 | LG9 | hypothetical protein CICLE_v1 | not DE   | not DE   | not DE   | not DE  |
| EVM0018328 | LG9 | hypothetical protein CICLE_v1 | not DE   | not DE   | not DE   | not DE  |
| EVM0000636 | LG9 | hypothetical protein CICLE_v1 | not DE   | not DE   | not DE   | not DE  |
| EVM0015680 | LG9 | hypothetical protein CICLE_v1 | not DE   | not DE   | not DE   | not DE  |
| EVM0021795 | LG9 | hypothetical protein CICLE_v1 | not DE   | not DE   | not DE   | not DE  |
| EVM0001841 | LG9 | hypothetical protein CICLE_v1 | not DE   | not DE   | not DE   | not DE  |
| EVM0017683 | LG9 | hypothetical protein CICLE_v1 | not DE   | not DE   | not DE   | not DE  |
| EVM0009472 | LG9 | hypothetical protein CICLE_v1 | not DE   | not DE   | not DE   | not DE  |
| EVM0001946 | LG9 | hypothetical protein CICLE_v1 | not DE   | not DE   | not DE   | not DE  |
| EVM0020165 | LG9 | hypothetical protein CICLE_v1 | not DE   | not DE   | not DE   | not DE  |
| EVM0017377 | LG9 | hypothetical protein CICLE_v1 | not DE   | not DE   | not DE   | not DE  |
| EVM0000592 | LG9 | hypothetical protein CICLE_v1 | not DE   | not DE   | not DE   | not DE  |
| EVM0016264 | LG9 | hypothetical protein CICLE_v1 | not DE   | not DE   | not DE   | not DE  |
| EVM0000159 | LG9 | hypothetical protein CICLE_v1 | not DE   | not DE   | not DE   | not DE  |
| EVM0024564 | LG9 | hypothetical protein CICLE_v1 | 1.328735 | 0.005049 | not DE   | not DE  |

|            |     |                               |          |          |          |         |
|------------|-----|-------------------------------|----------|----------|----------|---------|
| EVM0018091 | LG9 | hypothetical protein CICLE_v1 | not DE   | not DE   | not DE   | not DE  |
| EVM0022492 | LG9 | hypothetical protein CICLE_v1 | not DE   | not DE   | not DE   | not DE  |
| EVM0016279 | LG9 | hypothetical protein CICLE_v1 | not DE   | not DE   | not DE   | not DE  |
| EVM0005616 | LG9 | hypothetical protein CICLE_v1 | not DE   | not DE   | not DE   | not DE  |
| EVM0021320 | LG9 | hypothetical protein CICLE_v1 | not DE   | not DE   | not DE   | not DE  |
| EVM0023390 | LG9 | hypothetical protein CICLE_v1 | not DE   | not DE   | not DE   | not DE  |
| EVM0009157 | LG9 | hypothetical protein CICLE_v1 | not DE   | not DE   | not DE   | not DE  |
| EVM0007794 | LG9 | hypothetical protein CICLE_v1 | -1.04021 | 0.00157  | not DE   | not DE  |
| EVM0020440 | LG9 | hypothetical protein CICLE_v1 | not DE   | not DE   | not DE   | not DE  |
| EVM0001058 | LG9 | hypothetical protein CICLE_v1 | not DE   | not DE   | not DE   | not DE  |
| EVM0001075 | LG9 | hypothetical protein CICLE_v1 | not DE   | not DE   | not DE   | not DE  |
| EVM0020156 | LG9 | hypothetical protein CICLE_v1 | not DE   | not DE   | not DE   | not DE  |
| EVM0011529 | LG9 | hypothetical protein CICLE_v1 | not DE   | not DE   | not DE   | not DE  |
| EVM0010334 | LG9 | hypothetical protein CICLE_v1 | not DE   | not DE   | -1.43296 | 0.00069 |
| EVM0015112 | LG9 | hypothetical protein CICLE_v1 | not DE   | not DE   | not DE   | not DE  |
| EVM0004638 | LG9 | hypothetical protein CICLE_v1 | not DE   | not DE   | not DE   | not DE  |
| EVM0010679 | LG9 | hypothetical protein CICLE_v1 | not DE   | not DE   | not DE   | not DE  |
| EVM0003905 | LG9 | hypothetical protein CICLE_v1 | not DE   | not DE   | not DE   | not DE  |
| EVM0004707 | LG9 | hypothetical protein CICLE_v1 | not DE   | not DE   | not DE   | not DE  |
| EVM0017209 | LG9 | hypothetical protein CICLE_v1 | not DE   | not DE   | not DE   | not DE  |
| EVM0012732 | LG9 | hypothetical protein CICLE_v1 | not DE   | not DE   | not DE   | not DE  |
| EVM0022312 | LG9 | hypothetical protein CICLE_v1 | not DE   | not DE   | not DE   | not DE  |
| EVM0022326 | LG9 | hypothetical protein CICLE_v1 | not DE   | not DE   | not DE   | not DE  |
| EVM0006085 | LG9 | hypothetical protein CICLE_v1 | not DE   | not DE   | not DE   | not DE  |
| EVM0016416 | LG9 | hypothetical protein CICLE_v1 | not DE   | not DE   | not DE   | not DE  |
| EVM0006893 | LG9 | hypothetical protein CICLE_v1 | not DE   | not DE   | not DE   | not DE  |
| EVM0016441 | LG9 | hypothetical protein CICLE_v1 | not DE   | not DE   | not DE   | not DE  |
| EVM0019816 | LG9 | hypothetical protein CICLE_v1 | not DE   | not DE   | not DE   | not DE  |
| EVM0017102 | LG9 | hypothetical protein CICLE_v1 | not DE   | not DE   | not DE   | not DE  |
| EVM0006719 | LG9 | hypothetical protein CICLE_v1 | not DE   | not DE   | not DE   | not DE  |
| EVM0006748 | LG9 | hypothetical protein CICLE_v1 | not DE   | not DE   | not DE   | not DE  |
| EVM0002898 | LG9 | hypothetical protein CICLE_v1 | not DE   | not DE   | not DE   | not DE  |
| EVM0020674 | LG9 | hypothetical protein CICLE_v1 | not DE   | not DE   | not DE   | not DE  |
| EVM0022598 | LG9 | hypothetical protein CICLE_v1 | not DE   | not DE   | not DE   | not DE  |
| EVM0024243 | LG9 | hypothetical protein CICLE_v1 | not DE   | not DE   | not DE   | not DE  |
| EVM0022898 | LG9 | hypothetical protein CICLE_v1 | not DE   | not DE   | not DE   | not DE  |
| EVM0021679 | LG9 | hypothetical protein CICLE_v1 | not DE   | not DE   | not DE   | not DE  |
| EVM0000912 | LG9 | hypothetical protein CICLE_v1 | not DE   | not DE   | not DE   | not DE  |
| EVM0003071 | LG9 | hypothetical protein CICLE_v1 | not DE   | not DE   | not DE   | not DE  |
| EVM0008846 | LG9 | hypothetical protein CICLE_v1 | not DE   | not DE   | not DE   | not DE  |
| EVM0005277 | LG9 | hypothetical protein CICLE_v1 | not DE   | not DE   | not DE   | not DE  |
| EVM0008375 | LG9 | hypothetical protein CICLE_v1 | 1.03742  | 0.013357 | not DE   | not DE  |
| EVM0024434 | LG9 | hypothetical protein CICLE_v1 | not DE   | not DE   | not DE   | not DE  |
| EVM0004551 | LG9 | hypothetical protein CICLE_v1 | not DE   | not DE   | not DE   | not DE  |
| EVM0014634 | LG9 | hypothetical protein CICLE_v1 | not DE   | not DE   | not DE   | not DE  |
| EVM0004881 | LG9 | hypothetical protein CICLE_v1 | not DE   | not DE   | not DE   | not DE  |
| EVM0023676 | LG9 | hypothetical protein CICLE_v1 | 1.311281 | 0.032776 | not DE   | not DE  |
| EVM0008211 | LG9 | hypothetical protein CICLE_v1 | not DE   | not DE   | not DE   | not DE  |
| EVM0015293 | LG9 | hypothetical protein CICLE_v1 | not DE   | not DE   | not DE   | not DE  |
| EVM0005661 | LG9 | hypothetical protein CICLE_v1 | not DE   | not DE   | not DE   | not DE  |
| EVM0008434 | LG9 | hypothetical protein CICLE_v1 | not DE   | not DE   | not DE   | not DE  |
| EVM0002405 | LG9 | hypothetical protein CICLE_v1 | not DE   | not DE   | not DE   | not DE  |
| EVM0004083 | LG9 | hypothetical protein CICLE_v1 | not DE   | not DE   | not DE   | not DE  |
| EVM0016894 | LG9 | hypothetical protein CICLE_v1 | not DE   | not DE   | not DE   | not DE  |

|            |     |                               |          |          |          |         |
|------------|-----|-------------------------------|----------|----------|----------|---------|
| EVM0021764 | LG9 | hypothetical protein CICLE_v1 | not DE   | not DE   | 1.272907 | 0.01555 |
| EVM0007165 | LG9 | hypothetical protein CICLE_v1 | not DE   | not DE   | not DE   | not DE  |
| EVM0012239 | LG9 | hypothetical protein CICLE_v1 | not DE   | not DE   | not DE   | not DE  |
| EVM0015790 | LG9 | hypothetical protein CICLE_v1 | not DE   | not DE   | not DE   | not DE  |
| EVM0024491 | LG9 | hypothetical protein CICLE_v1 | not DE   | not DE   | not DE   | not DE  |
| EVM0000423 | LG9 | hypothetical protein CICLE_v1 | not DE   | not DE   | not DE   | not DE  |
| EVM0018580 | LG9 | hypothetical protein CICLE_v1 | not DE   | not DE   | not DE   | not DE  |
| EVM0019298 | LG9 | hypothetical protein CICLE_v1 | not DE   | not DE   | not DE   | not DE  |
| EVM0007954 | LG9 | hypothetical protein CICLE_v1 | not DE   | not DE   | not DE   | not DE  |
| EVM0018675 | LG9 | hypothetical protein CICLE_v1 | not DE   | not DE   | not DE   | not DE  |
| EVM0019340 | LG9 | hypothetical protein CICLE_v1 | not DE   | not DE   | not DE   | not DE  |
| EVM0020208 | LG9 | hypothetical protein CICLE_v1 | -1.49021 | 0.002796 | not DE   | not DE  |
| EVM0009718 | LG9 | hypothetical protein CICLE_v1 | -2.81789 | 8.65E-08 | -3.08632 | 0.00016 |
| EVM0002103 | LG9 | hypothetical protein CICLE_v1 | not DE   | not DE   | not DE   | not DE  |
| EVM0018171 | LG9 | hypothetical protein CICLE_v1 | not DE   | not DE   | not DE   | not DE  |
| EVM0009326 | LG9 | hypothetical protein CICLE_v1 | not DE   | not DE   | not DE   | not DE  |
| EVM0000070 | LG9 | hypothetical protein CICLE_v1 | not DE   | not DE   | not DE   | not DE  |
| EVM0024540 | LG9 | hypothetical protein CICLE_v1 | not DE   | not DE   | not DE   | not DE  |
| EVM0017825 | LG9 | hypothetical protein CICLE_v1 | not DE   | not DE   | not DE   | not DE  |
| EVM0020501 | LG9 | hypothetical protein CICLE_v1 | not DE   | not DE   | not DE   | not DE  |
| EVM0006054 | LG9 | hypothetical protein CICLE_v1 | not DE   | not DE   | not DE   | not DE  |
| EVM0004698 | LG9 | hypothetical protein CICLE_v1 | not DE   | not DE   | not DE   | not DE  |
| EVM0013743 | LG9 | hypothetical protein CICLE_v1 | not DE   | not DE   | not DE   | not DE  |
| EVM0001657 | LG9 | hypothetical protein CICLE_v1 | not DE   | not DE   | not DE   | not DE  |
| EVM0003017 | LG9 | hypothetical protein CICLE_v1 | not DE   | not DE   | not DE   | not DE  |
| EVM0014197 | LG9 | hypothetical protein CICLE_v1 | not DE   | not DE   | not DE   | not DE  |
| EVM0021573 | LG9 | hypothetical protein CICLE_v1 | not DE   | not DE   | not DE   | not DE  |
| EVM0006569 | LG9 | hypothetical protein CICLE_v1 | not DE   | not DE   | not DE   | not DE  |
| EVM0018141 | LG9 | hypothetical protein CICLE_v1 | not DE   | not DE   | not DE   | not DE  |
| EVM0009776 | LG9 | hypothetical protein CICLE_v1 | not DE   | not DE   | not DE   | not DE  |
| EVM0015673 | LG9 | hypothetical protein CICLE_v1 | not DE   | not DE   | not DE   | not DE  |
| EVM0022994 | LG9 | hypothetical protein CICLE_v1 | not DE   | not DE   | not DE   | not DE  |
| EVM0019553 | LG9 | hypothetical protein CICLE_v1 | -1.05729 | 0.007719 | 1.374907 | #####   |
| EVM0000858 | LG9 | hypothetical protein CICLE_v1 | not DE   | not DE   | not DE   | not DE  |
| EVM0023299 | LG9 | hypothetical protein CICLE_v1 | not DE   | not DE   | not DE   | not DE  |
| EVM0022762 | LG9 | hypothetical protein CICLE_v1 | not DE   | not DE   | not DE   | not DE  |
| EVM0011931 | LG9 | hypothetical protein CICLE_v1 | not DE   | not DE   | not DE   | not DE  |
| EVM0013708 | LG9 | hypothetical protein CICLE_v1 | not DE   | not DE   | not DE   | not DE  |
| EVM0011682 | LG9 | hypothetical protein CICLE_v1 | not DE   | not DE   | not DE   | not DE  |
| EVM0018855 | LG9 | hypothetical protein CICLE_v1 | not DE   | not DE   | 1.406612 | 0.00362 |
| EVM0014679 | LG9 | hypothetical protein CICLE_v1 | not DE   | not DE   | not DE   | not DE  |
| EVM0015421 | LG9 | hypothetical protein CICLE_v1 | not DE   | not DE   | not DE   | not DE  |
| EVM0009969 | LG9 | hypothetical protein CICLE_v1 | not DE   | not DE   | not DE   | not DE  |
| EVM0009064 | LG9 | hypothetical protein CICLE_v1 | not DE   | not DE   | not DE   | not DE  |
| EVM0006410 | LG9 | hypothetical protein CICLE_v1 | not DE   | not DE   | not DE   | not DE  |
| EVM0020788 | LG9 | hypothetical protein CICLE_v1 | not DE   | not DE   | not DE   | not DE  |
| EVM0008141 | LG9 | hypothetical protein CICLE_v1 | not DE   | not DE   | not DE   | not DE  |
| EVM0009279 | LG9 | hypothetical protein CICLE_v1 | not DE   | not DE   | not DE   | not DE  |
| EVM0015798 | LG9 | hypothetical protein CICLE_v1 | -2.6261  | 0.02219  | -2.51154 | #####   |
| EVM0023173 | LG9 | hypothetical protein CICLE_v1 | not DE   | not DE   | not DE   | not DE  |
| EVM0005936 | LG9 | hypothetical protein CICLE_v1 | not DE   | not DE   | not DE   | not DE  |
| EVM0010782 | LG9 | hypothetical protein CICLE_v1 | not DE   | not DE   | not DE   | not DE  |
| EVM0008161 | LG9 | hypothetical protein CICLE_v1 | 3.570557 | 2.10E-13 | not DE   | not DE  |
| EVM0023084 | LG9 | hypothetical protein CICLE_v1 | not DE   | not DE   | not DE   | not DE  |

|            |     |                               |          |          |          |         |
|------------|-----|-------------------------------|----------|----------|----------|---------|
| EVM0004824 | LG9 | hypothetical protein CICLE_v1 | not DE   | not DE   | not DE   | not DE  |
| EVM0005283 | LG9 | hypothetical protein CICLE_v1 | not DE   | not DE   | not DE   | not DE  |
| EVM0003966 | LG9 | hypothetical protein CICLE_v1 | not DE   | not DE   | not DE   | not DE  |
| EVM0008605 | LG9 | hypothetical protein CICLE_v1 | not DE   | not DE   | not DE   | not DE  |
| EVM0017595 | LG9 | hypothetical protein CICLE_v1 | not DE   | not DE   | not DE   | not DE  |
| EVM0014985 | LG9 | hypothetical protein CICLE_v1 | not DE   | not DE   | not DE   | not DE  |
| EVM0015344 | LG9 | hypothetical protein CICLE_v1 | not DE   | not DE   | not DE   | not DE  |
| EVM0012670 | LG9 | hypothetical protein CICLE_v1 | not DE   | not DE   | not DE   | not DE  |
| EVM0011570 | LG9 | hypothetical protein CICLE_v1 | not DE   | not DE   | not DE   | not DE  |
| EVM0021067 | LG9 | hypothetical protein CICLE_v1 | not DE   | not DE   | not DE   | not DE  |
| EVM0011939 | LG9 | hypothetical protein CICLE_v1 | not DE   | not DE   | not DE   | not DE  |
| EVM0010275 | LG9 | hypothetical protein CICLE_v1 | not DE   | not DE   | not DE   | not DE  |
| EVM0022075 | LG9 | hypothetical protein CICLE_v1 | not DE   | not DE   | not DE   | not DE  |
| EVM0010756 | LG9 | hypothetical protein CICLE_v1 | not DE   | not DE   | not DE   | not DE  |
| EVM0000324 | LG9 | hypothetical protein CICLE_v1 | not DE   | not DE   | not DE   | not DE  |
| EVM0013911 | LG9 | hypothetical protein CICLE_v1 | not DE   | not DE   | not DE   | not DE  |
| EVM0002868 | LG9 | hypothetical protein CICLE_v1 | not DE   | not DE   | not DE   | not DE  |
| EVM0019612 | LG9 | hypothetical protein CICLE_v1 | not DE   | not DE   | not DE   | not DE  |
| EVM0022820 | LG9 | hypothetical protein CICLE_v1 | not DE   | not DE   | not DE   | not DE  |
| EVM0014439 | LG9 | hypothetical protein CICLE_v1 | not DE   | not DE   | not DE   | not DE  |
| EVM0009804 | LG9 | hypothetical protein CICLE_v1 | not DE   | not DE   | not DE   | not DE  |
| EVM0013931 | LG9 | hypothetical protein CICLE_v1 | not DE   | not DE   | not DE   | not DE  |
| EVM0013608 | LG9 | hypothetical protein CICLE_v1 | not DE   | not DE   | not DE   | not DE  |
| EVM0008068 | LG9 | hypothetical protein CICLE_v1 | not DE   | not DE   | not DE   | not DE  |
| EVM0004440 | LG9 | hypothetical protein CICLE_v1 | -4.00539 | 0.000469 | not DE   | not DE  |
| EVM0006270 | LG9 | hypothetical protein CICLE_v1 | not DE   | not DE   | not DE   | not DE  |
| EVM0000163 | LG9 | hypothetical protein CICLE_v1 | not DE   | not DE   | not DE   | not DE  |
| EVM0020968 | LG9 | hypothetical protein CICLE_v1 | not DE   | not DE   | not DE   | not DE  |
| EVM0013627 | LG9 | hypothetical protein CICLE_v1 | not DE   | not DE   | not DE   | not DE  |
| EVM0006131 | LG9 | hypothetical protein CICLE_v1 | not DE   | not DE   | not DE   | not DE  |
| EVM0014977 | LG9 | hypothetical protein CICLE_v1 | not DE   | not DE   | not DE   | not DE  |
| EVM0004550 | LG9 | hypothetical protein CICLE_v1 | not DE   | not DE   | not DE   | not DE  |
| EVM0018964 | LG9 | hypothetical protein CICLE_v1 | not DE   | not DE   | not DE   | not DE  |
| EVM0005873 | LG9 | hypothetical protein CICLE_v1 | not DE   | not DE   | not DE   | not DE  |
| EVM0000759 | LG9 | hypothetical protein CICLE_v1 | not DE   | not DE   | 1.007134 | #####   |
| EVM0018000 | LG9 | hypothetical protein CICLE_v1 | not DE   | not DE   | not DE   | not DE  |
| EVM0015105 | LG9 | hypothetical protein CICLE_v1 | not DE   | not DE   | not DE   | not DE  |
| EVM0003395 | LG9 | hypothetical protein CISIN_1g | 1.769052 | 0.003631 | not DE   | not DE  |
| EVM0011366 | LG9 | hypothetical protein CISIN_1g | not DE   | not DE   | -1.29369 | 0.00021 |
| EVM0010548 | LG9 | hypothetical protein CISIN_1g | not DE   | not DE   | not DE   | not DE  |
| EVM0012220 | LG9 | hypothetical protein CISIN_1g | not DE   | not DE   | not DE   | not DE  |
| EVM0009192 | LG9 | hypothetical protein CISIN_1g | not DE   | not DE   | not DE   | not DE  |
| EVM0024079 | LG9 | hypothetical protein CISIN_1g | not DE   | not DE   | not DE   | not DE  |
| EVM0005993 | LG9 | hypothetical protein CISIN_1g | not DE   | not DE   | 1.019629 | 0.01634 |
| EVM0010840 | LG9 | hypothetical protein CISIN_1g | not DE   | not DE   | not DE   | not DE  |
| EVM0010094 | LG9 | hypothetical protein CISIN_1g | not DE   | not DE   | not DE   | not DE  |
| EVM0007687 | LG9 | hypothetical protein CISIN_1g | not DE   | not DE   | not DE   | not DE  |
| EVM0009709 | LG9 | hypothetical protein CISIN_1g | not DE   | not DE   | not DE   | not DE  |
| EVM0011480 | LG9 | hypothetical protein CISIN_1g | not DE   | not DE   | not DE   | not DE  |
| EVM0014790 | LG9 | hypothetical protein CISIN_1g | not DE   | not DE   | not DE   | not DE  |
| EVM0023098 | LG9 | hypothetical protein CISIN_1g | not DE   | not DE   | not DE   | not DE  |
| EVM0007145 | LG9 | hypothetical protein CISIN_1g | not DE   | not DE   | -1.03736 | 0.03092 |
| EVM0012602 | LG9 | hypothetical protein CISIN_1g | not DE   | not DE   | not DE   | not DE  |
| EVM0005882 | LG9 | hypothetical protein CISIN_1g | not DE   | not DE   | not DE   | not DE  |

|            |     |                               |          |          |          |         |
|------------|-----|-------------------------------|----------|----------|----------|---------|
| EVM0021157 | LG9 | hypothetical protein CISIN_1g | 1.97207  | 0.000734 | not DE   | not DE  |
| EVM0001608 | LG9 | hypothetical protein CISIN_1g | not DE   | not DE   | not DE   | not DE  |
| EVM0015477 | LG9 | hypothetical protein CISIN_1g | not DE   | not DE   | not DE   | not DE  |
| EVM0023999 | LG9 | hypothetical protein CISIN_1g | not DE   | not DE   | not DE   | not DE  |
| EVM0021711 | LG9 | hypothetical protein CISIN_1g | not DE   | not DE   | not DE   | not DE  |
| EVM0000805 | LG9 | hypothetical protein CISIN_1g | not DE   | not DE   | not DE   | not DE  |
| EVM0001651 | LG9 | hypothetical protein CISIN_1g | not DE   | not DE   | not DE   | not DE  |
| EVM0023025 | LG9 | hypothetical protein CISIN_1g | not DE   | not DE   | not DE   | not DE  |
| EVM0002545 | LG9 | hypothetical protein CISIN_1g | not DE   | not DE   | not DE   | not DE  |
| EVM0019007 | LG9 | hypothetical protein CISIN_1g | not DE   | not DE   | not DE   | not DE  |
| EVM0014372 | LG9 | hypothetical protein CISIN_1g | not DE   | not DE   | not DE   | not DE  |
| EVM0019352 | LG9 | hypothetical protein CISIN_1g | not DE   | not DE   | not DE   | not DE  |
| EVM0010368 | LG9 | hypothetical protein CISIN_1g | not DE   | not DE   | not DE   | not DE  |
| EVM0012143 | LG9 | hypothetical protein CISIN_1g | not DE   | not DE   | not DE   | not DE  |
| EVM0024463 | LG9 | hypothetical protein CISIN_1g | not DE   | not DE   | not DE   | not DE  |
| EVM0007213 | LG9 | hypothetical protein CISIN_1g | not DE   | not DE   | not DE   | not DE  |
| EVM0013847 | LG9 | hypothetical protein CISIN_1g | not DE   | not DE   | not DE   | not DE  |
| EVM0004742 | LG9 | hypothetical protein CISIN_1g | not DE   | not DE   | not DE   | not DE  |
| EVM0011771 | LG9 | hypothetical protein CISIN_1g | not DE   | not DE   | not DE   | not DE  |
| EVM0017999 | LG9 | hypothetical protein CISIN_1g | not DE   | not DE   | -5.90655 | #####   |
| EVM0000840 | LG9 | hypothetical protein CISIN_1g | not DE   | not DE   | not DE   | not DE  |
| EVM0007655 | LG9 | hypothetical protein CISIN_1g | not DE   | not DE   | not DE   | not DE  |
| EVM0011880 | LG9 | hypothetical protein CISIN_1g | not DE   | not DE   | not DE   | not DE  |
| EVM0016932 | LG9 | hypothetical protein CISIN_1g | not DE   | not DE   | not DE   | not DE  |
| EVM0007530 | LG9 | hypothetical protein CISIN_1g | not DE   | not DE   | not DE   | not DE  |
| EVM0014483 | LG9 | hypothetical protein CISIN_1g | not DE   | not DE   | 2.330116 | 0.00302 |
| EVM0006397 | LG9 | hypothetical protein CISIN_1g | -1.47125 | 0.013164 | not DE   | not DE  |
| EVM0019452 | LG9 | hypothetical protein CISIN_1g | not DE   | not DE   | not DE   | not DE  |
| EVM0011226 | LG9 | hypothetical protein CISIN_1g | -1.27715 | 4.81E-09 | -1.51857 | #####   |
| EVM0017366 | LG9 | hypothetical protein CISIN_1g | not DE   | not DE   | not DE   | not DE  |
| EVM0005457 | LG9 | hypothetical protein CISIN_1g | not DE   | not DE   | not DE   | not DE  |
| EVM0007926 | LG9 | hypothetical protein CISIN_1g | not DE   | not DE   | not DE   | not DE  |
| EVM0023091 | LG9 | hypothetical protein CISIN_1g | not DE   | not DE   | not DE   | not DE  |
| EVM0014387 | LG9 | hypothetical protein CISIN_1g | not DE   | not DE   | not DE   | not DE  |
| EVM0001868 | LG9 | hypothetical protein CISIN_1g | not DE   | not DE   | not DE   | not DE  |
| EVM0000891 | LG9 | hypothetical protein CISIN_1g | not DE   | not DE   | not DE   | not DE  |
| EVM0011513 | LG9 | hypothetical protein CISIN_1g | not DE   | not DE   | not DE   | not DE  |
| EVM0005833 | LG9 | hypothetical protein CISIN_1g | not DE   | not DE   | not DE   | not DE  |
| EVM0010580 | LG9 | hypothetical protein CISIN_1g | not DE   | not DE   | 2.35869  | 0.00019 |
| EVM0001883 | LG9 | hypothetical protein CISIN_1g | not DE   | not DE   | not DE   | not DE  |
| EVM0015927 | LG9 | hypothetical protein CISIN_1g | not DE   | not DE   | not DE   | not DE  |
| EVM0011793 | LG9 | hypothetical protein CISIN_1g | not DE   | not DE   | not DE   | not DE  |
| EVM0009792 | LG9 | hypothetical protein CISIN_1g | not DE   | not DE   | not DE   | not DE  |
| EVM0011342 | LG9 | hypothetical protein CISIN_1g | not DE   | not DE   | not DE   | not DE  |
| EVM0017113 | LG9 | hypothetical protein CISIN_1g | not DE   | not DE   | not DE   | not DE  |
| EVM0017473 | LG9 | hypothetical protein CISIN_1g | not DE   | not DE   | not DE   | not DE  |
| EVM0007958 | LG9 | hypothetical protein CISIN_1g | 1.309704 | 0.013818 | not DE   | not DE  |
| EVM0023099 | LG9 | hypothetical protein CISIN_1g | not DE   | not DE   | not DE   | not DE  |
| EVM0024254 | LG9 | hypothetical protein CISIN_1g | not DE   | not DE   | not DE   | not DE  |
| EVM0007559 | LG9 | hypothetical protein CISIN_1g | not DE   | not DE   | not DE   | not DE  |
| EVM0004092 | LG9 | hypothetical protein CISIN_1g | not DE   | not DE   | not DE   | not DE  |
| EVM0016166 | LG9 | hypothetical protein CISIN_1g | not DE   | not DE   | not DE   | not DE  |
| EVM0021016 | LG9 | hypothetical protein CISIN_1g | not DE   | not DE   | not DE   | not DE  |
| EVM0002179 | LG9 | hypothetical protein CISIN_1g | -4.09388 | 0.008253 | not DE   | not DE  |

|            |     |                               |        |        |         |         |
|------------|-----|-------------------------------|--------|--------|---------|---------|
| EVM0008362 | LG9 | hypothetical protein CISIN_1g | not DE | not DE | not DE  | not DE  |
| EVM0005971 | LG9 | hypothetical protein CISIN_1g | not DE | not DE | not DE  | not DE  |
| EVM0010593 | LG9 | hypothetical protein CISIN_1g | not DE | not DE | not DE  | not DE  |
| EVM0017481 | LG9 | hypothetical protein CISIN_1g | not DE | not DE | not DE  | not DE  |
| EVM0019563 | LG9 | hypothetical protein CISIN_1g | not DE | not DE | not DE  | not DE  |
| EVM0001915 | LG9 | hypothetical protein CISIN_1g | not DE | not DE | not DE  | not DE  |
| EVM0003506 | LG9 | hypothetical protein CISIN_1g | not DE | not DE | not DE  | not DE  |
| EVM0013981 | LG9 | hypothetical protein CISIN_1g | not DE | not DE | not DE  | not DE  |
| EVM0017979 | LG9 | hypothetical protein CISIN_1g | not DE | not DE | not DE  | not DE  |
| EVM0014061 | LG9 | hypothetical protein CISIN_1g | not DE | not DE | not DE  | not DE  |
| EVM0014630 | LG9 | hypothetical protein CISIN_1g | not DE | not DE | not DE  | not DE  |
| EVM0019856 | LG9 | hypothetical protein CISIN_1g | not DE | not DE | not DE  | not DE  |
| EVM0020174 | LG9 | hypothetical protein CISIN_1g | not DE | not DE | not DE  | not DE  |
| EVM0020248 | LG9 | hypothetical protein CISIN_1g | not DE | not DE | not DE  | not DE  |
| EVM0023020 | LG9 | hypothetical protein CISIN_1g | not DE | not DE | not DE  | not DE  |
| EVM0012344 | LG9 | hypothetical protein CISIN_1g | not DE | not DE | not DE  | not DE  |
| EVM0013499 | LG9 | hypothetical protein CISIN_1g | not DE | not DE | not DE  | not DE  |
| EVM0004077 | LG9 | hypothetical protein CISIN_1g | not DE | not DE | not DE  | not DE  |
| EVM0011087 | LG9 | hypothetical protein CISIN_1g | not DE | not DE | not DE  | not DE  |
| EVM0014000 | LG9 | hypothetical protein CISIN_1g | not DE | not DE | not DE  | not DE  |
| EVM0019876 | LG9 | hypothetical protein CISIN_1g | not DE | not DE | not DE  | not DE  |
| EVM0024410 | LG9 | hypothetical protein CISIN_1g | not DE | not DE | not DE  | not DE  |
| EVM0015488 | LG9 | hypothetical protein CISIN_1g | not DE | not DE | not DE  | not DE  |
| EVM0024091 | LG9 | hypothetical protein CISIN_1g | not DE | not DE | not DE  | not DE  |
| EVM0002881 | LG9 | hypothetical protein CISIN_1g | not DE | not DE | not DE  | not DE  |
| EVM0004378 | LG9 | hypothetical protein CISIN_1g | not DE | not DE | not DE  | not DE  |
| EVM0014473 | LG9 | hypothetical protein CISIN_1g | not DE | not DE | not DE  | not DE  |
| EVM0016998 | LG9 | hypothetical protein CISIN_1g | not DE | not DE | not DE  | not DE  |
| EVM0004191 | LG9 | hypothetical protein CISIN_1g | not DE | not DE | not DE  | not DE  |
| EVM0011478 | LG9 | hypothetical protein CISIN_1g | not DE | not DE | 3.11242 | 0.00057 |
| EVM0020097 | LG9 | hypothetical protein CISIN_1g | not DE | not DE | not DE  | not DE  |
| EVM0003311 | LG9 | hypothetical protein CISIN_1g | not DE | not DE | not DE  | not DE  |
| EVM0009463 | LG9 | hypothetical protein CISIN_1g | not DE | not DE | not DE  | not DE  |
| EVM0013442 | LG9 | hypothetical protein CISIN_1g | not DE | not DE | not DE  | not DE  |
| EVM0008450 | LG9 | hypothetical protein CISIN_1g | not DE | not DE | not DE  | not DE  |
| EVM0019955 | LG9 | hypothetical protein CISIN_1g | not DE | not DE | not DE  | not DE  |
| EVM0007218 | LG9 | hypothetical protein CISIN_1g | not DE | not DE | not DE  | not DE  |
| EVM0009898 | LG9 | hypothetical protein CISIN_1g | not DE | not DE | not DE  | not DE  |
| EVM0002948 | LG9 | hypothetical protein CISIN_1g | not DE | not DE | not DE  | not DE  |
| EVM0005244 | LG9 | hypothetical protein CISIN_1g | not DE | not DE | not DE  | not DE  |
| EVM0006666 | LG9 | hypothetical protein CISIN_1g | not DE | not DE | not DE  | not DE  |
| EVM0009044 | LG9 | hypothetical protein CISIN_1g | not DE | not DE | not DE  | not DE  |
| EVM0011161 | LG9 | hypothetical protein CISIN_1g | not DE | not DE | not DE  | not DE  |
| EVM0014432 | LG9 | hypothetical protein CISIN_1g | not DE | not DE | not DE  | not DE  |
| EVM0022194 | LG9 | hypothetical protein CISIN_1g | not DE | not DE | not DE  | not DE  |
| EVM0017492 | LG9 | hypothetical protein CISIN_1g | not DE | not DE | not DE  | not DE  |
| EVM0009126 | LG9 | hypothetical protein CISIN_1g | not DE | not DE | not DE  | not DE  |
| EVM0000791 | LG9 | hypothetical protein EUGRSUZ_ | not DE | not DE | not DE  | not DE  |
| EVM0000625 | LG9 | hypothetical protein EUGRSUZ_ | not DE | not DE | not DE  | not DE  |
| EVM0006068 | LG9 | hypothetical protein F383_086 | not DE | not DE | not DE  | not DE  |
| EVM0016640 | LG9 | hypothetical protein F383_199 | not DE | not DE | not DE  | not DE  |
| EVM0024326 | LG9 | hypothetical protein F383_199 | not DE | not DE | not DE  | not DE  |
| EVM0006327 | LG9 | hypothetical protein JCGZ_005 | not DE | not DE | not DE  | not DE  |
| EVM0016398 | LG9 | hypothetical protein JCGZ_006 | not DE | not DE | not DE  | not DE  |

|            |     |                               |          |          |          |         |
|------------|-----|-------------------------------|----------|----------|----------|---------|
| EVM0003869 | LG9 | hypothetical protein JCGZ_060 | not DE   | not DE   | not DE   | not DE  |
| EVM0022351 | LG9 | hypothetical protein JCGZ_060 | not DE   | not DE   | not DE   | not DE  |
| EVM0011564 | LG9 | hypothetical protein JCGZ_061 | not DE   | not DE   | -1.23591 | 0.01287 |
| EVM0013742 | LG9 | hypothetical protein JCGZ_061 | not DE   | not DE   | not DE   | not DE  |
| EVM0017565 | LG9 | hypothetical protein JCGZ_062 | not DE   | not DE   | not DE   | not DE  |
| EVM0018268 | LG9 | hypothetical protein JCGZ_114 | not DE   | not DE   | not DE   | not DE  |
| EVM0005600 | LG9 | hypothetical protein JCGZ_153 | not DE   | not DE   | not DE   | not DE  |
| EVM0000162 | LG9 | hypothetical protein JCGZ_172 | not DE   | not DE   | not DE   | not DE  |
| EVM0001054 | LG9 | hypothetical protein JCGZ_172 | not DE   | not DE   | not DE   | not DE  |
| EVM0002891 | LG9 | hypothetical protein JCGZ_172 | not DE   | not DE   | not DE   | not DE  |
| EVM0005655 | LG9 | hypothetical protein JCGZ_172 | not DE   | not DE   | not DE   | not DE  |
| EVM0007466 | LG9 | hypothetical protein JCGZ_172 | not DE   | not DE   | not DE   | not DE  |
| EVM0011922 | LG9 | hypothetical protein JCGZ_172 | not DE   | not DE   | not DE   | not DE  |
| EVM0017098 | LG9 | hypothetical protein JCGZ_172 | -4.41058 | 0.006885 | not DE   | not DE  |
| EVM0019203 | LG9 | hypothetical protein JCGZ_172 | not DE   | not DE   | not DE   | not DE  |
| EVM0002816 | LG9 | hypothetical protein JCGZ_173 | not DE   | not DE   | not DE   | not DE  |
| EVM0003878 | LG9 | hypothetical protein JCGZ_173 | not DE   | not DE   | not DE   | not DE  |
| EVM0006079 | LG9 | hypothetical protein JCGZ_205 | not DE   | not DE   | not DE   | not DE  |
| EVM0010133 | LG9 | hypothetical protein JCGZ_225 | not DE   | not DE   | not DE   | not DE  |
| EVM0022413 | LG9 | hypothetical protein JCGZ_225 | not DE   | not DE   | not DE   | not DE  |
| EVM0003235 | LG9 | hypothetical protein JCGZ_225 | not DE   | not DE   | not DE   | not DE  |
| EVM0002966 | LG9 | hypothetical protein JCGZ_245 | not DE   | not DE   | not DE   | not DE  |
| EVM0022516 | LG9 | hypothetical protein JCGZ_246 | not DE   | not DE   | not DE   | not DE  |
| EVM0007266 | LG9 | hypothetical protein JCGZ_246 | not DE   | not DE   | not DE   | not DE  |
| EVM0007914 | LG9 | hypothetical protein JCGZ_246 | not DE   | not DE   | not DE   | not DE  |
| EVM0017971 | LG9 | hypothetical protein JCGZ_246 | not DE   | not DE   | not DE   | not DE  |
| EVM0010340 | LG9 | hypothetical protein JCGZ_247 | not DE   | not DE   | not DE   | not DE  |
| EVM0002552 | LG9 | hypothetical protein JCGZ_248 | not DE   | not DE   | not DE   | not DE  |
| EVM0008786 | LG9 | hypothetical protein L484_026 | -1.1048  | 0.000112 | not DE   | not DE  |
| EVM0014939 | LG9 | hypothetical protein L484_027 | not DE   | not DE   | not DE   | not DE  |
| EVM0023577 | LG9 | hypothetical protein M569_056 | not DE   | not DE   | not DE   | not DE  |
| EVM0007538 | LG9 | hypothetical protein MIMGU_mg | not DE   | not DE   | not DE   | not DE  |
| EVM0016629 | LG9 | hypothetical protein PHAVU_01 | not DE   | not DE   | not DE   | not DE  |
| EVM0020431 | LG9 | hypothetical protein PHAVU_01 | not DE   | not DE   | not DE   | not DE  |
| EVM0015025 | LG9 | hypothetical protein PHAVU_01 | not DE   | not DE   | not DE   | not DE  |
| EVM0021966 | LG9 | hypothetical protein PHAVU_01 | not DE   | not DE   | not DE   | not DE  |
| EVM0009891 | LG9 | hypothetical protein PHAVU_01 | not DE   | not DE   | not DE   | not DE  |
| EVM0010528 | LG9 | hypothetical protein PHAVU_01 | not DE   | not DE   | not DE   | not DE  |
| EVM0023925 | LG9 | hypothetical protein POPTR_00 | not DE   | not DE   | not DE   | not DE  |
| EVM0003237 | LG9 | hypothetical protein POPTR_00 | not DE   | not DE   | not DE   | not DE  |
| EVM0022772 | LG9 | hypothetical protein POPTR_00 | not DE   | not DE   | not DE   | not DE  |
| EVM0023835 | LG9 | hypothetical protein POPTR_00 | -1.71707 | 0.001027 | not DE   | not DE  |
| EVM0014922 | LG9 | hypothetical protein POPTR_00 | not DE   | not DE   | not DE   | not DE  |
| EVM0005987 | LG9 | hypothetical protein POPTR_00 | not DE   | not DE   | not DE   | not DE  |
| EVM0007231 | LG9 | hypothetical protein POPTR_00 | not DE   | not DE   | not DE   | not DE  |
| EVM0006450 | LG9 | hypothetical protein POPTR_00 | not DE   | not DE   | 1.245074 | 0.03384 |
| EVM0016063 | LG9 | hypothetical protein POPTR_00 | not DE   | not DE   | not DE   | not DE  |
| EVM0019762 | LG9 | hypothetical protein POPTR_00 | not DE   | not DE   | not DE   | not DE  |
| EVM0022743 | LG9 | hypothetical protein POPTR_00 | not DE   | not DE   | not DE   | not DE  |
| EVM0020723 | LG9 | hypothetical protein POPTR_00 | not DE   | not DE   | not DE   | not DE  |
| EVM0020452 | LG9 | hypothetical protein POPTR_00 | not DE   | not DE   | not DE   | not DE  |
| EVM0010560 | LG9 | hypothetical protein POPTR_09 | not DE   | not DE   | not DE   | not DE  |
| EVM0022211 | LG9 | hypothetical protein PRUPE_pp | not DE   | not DE   | not DE   | not DE  |
| EVM0014097 | LG9 | hypothetical protein PRUPE_pp | not DE   | not DE   | not DE   | not DE  |



|            |     |                                   |          |          |          |        |
|------------|-----|-----------------------------------|----------|----------|----------|--------|
| EVM0001064 | LG9 | hypothetical protein PRUPE_pp     | not DE   | not DE   | not DE   | not DE |
| EVM0015078 | LG9 | hypothetical protein PRUPE_pp     | not DE   | not DE   | not DE   | not DE |
| EVM0015309 | LG9 | hypothetical protein PRUPE_pp     | -1.84422 | 8.39E-09 | not DE   | not DE |
| EVM0004463 | LG9 | hypothetical protein PRUPE_pp     | not DE   | not DE   | not DE   | not DE |
| EVM0008031 | LG9 | hypothetical protein PRUPE_pp     | not DE   | not DE   | not DE   | not DE |
| EVM0007674 | LG9 | hypothetical protein PRUPE_pp     | not DE   | not DE   | not DE   | not DE |
| EVM0016980 | LG9 | hypothetical protein PRUPE_pp     | not DE   | not DE   | not DE   | not DE |
| EVM0015965 | LG9 | hypothetical protein PRUPE_pp     | not DE   | not DE   | not DE   | not DE |
| EVM0007297 | LG9 | hypothetical protein PRUPE_pp     | not DE   | not DE   | not DE   | not DE |
| EVM0011355 | LG9 | hypothetical protein PRUPE_pp     | not DE   | not DE   | not DE   | not DE |
| EVM0008351 | LG9 | hypothetical protein PRUPE_pp     | not DE   | not DE   | not DE   | not DE |
| EVM0005176 | LG9 | hypothetical protein PRUPE_pp     | not DE   | not DE   | not DE   | not DE |
| EVM0023900 | LG9 | hypothetical protein PRUPE_pp     | not DE   | not DE   | not DE   | not DE |
| EVM0001390 | LG9 | hypothetical protein PRUPE_pp     | not DE   | not DE   | not DE   | not DE |
| EVM0021630 | LG9 | hypothetical protein PRUPE_pp     | not DE   | not DE   | not DE   | not DE |
| EVM0009294 | LG9 | hypothetical protein PRUPE_pp     | not DE   | not DE   | not DE   | not DE |
| EVM0006968 | LG9 | hypothetical protein PRUPE_pp     | not DE   | not DE   | not DE   | not DE |
| EVM0022605 | LG9 | hypothetical protein UP-4         | not DE   | not DE   | not DE   | not DE |
| EVM0020731 | LG9 | hypothetical protein VITISV_C     | not DE   | not DE   | not DE   | not DE |
| EVM0005225 | LG9 | hypothetical protein VITISV_C     | not DE   | not DE   | not DE   | not DE |
| EVM0021321 | LG9 | hypothetical protein VITISV_C     | not DE   | not DE   | not DE   | not DE |
| EVM0017011 | LG9 | hypothetical protein VITISV_C     | not DE   | not DE   | not DE   | not DE |
| EVM0021626 | LG9 | hypothetical protein VITISV_C     | not DE   | not DE   | not DE   | not DE |
| EVM0022531 | LG9 | hypothetical protein VITISV_C     | not DE   | not DE   | not DE   | not DE |
| EVM0023319 | LG9 | hypothetical protein VITISV_C     | not DE   | not DE   | not DE   | not DE |
| EVM0006241 | LG9 | hypothetical protein VITISV_C     | not DE   | not DE   | not DE   | not DE |
| EVM0019968 | LG9 | hypothetical protein VITISV_C     | not DE   | not DE   | not DE   | not DE |
| EVM0018412 | LG9 | hypothetical protein VITISV_C     | not DE   | not DE   | not DE   | not DE |
| EVM0005609 | LG9 | hypothetical protein VITISV_C     | not DE   | not DE   | not DE   | not DE |
| EVM0007184 | LG9 | hypothetical protein VITISV_C     | not DE   | not DE   | not DE   | not DE |
| EVM0021029 | LG9 | hypothetical protein VITISV_C     | not DE   | not DE   | not DE   | not DE |
| EVM0005438 | LG9 | hypothetical protein ZEAMMB73     | not DE   | not DE   | not DE   | not DE |
| EVM0004116 | LG9 | integral membrane family prot     | not DE   | not DE   | not DE   | not DE |
| EVM0010060 | LG9 | integrase                         | not DE   | not DE   | not DE   | not DE |
| EVM0012574 | LG9 | integrase                         | not DE   | not DE   | not DE   | not DE |
| EVM0014504 | LG9 | integrase                         | not DE   | not DE   | not DE   | not DE |
| EVM0021964 | LG9 | integrase                         | not DE   | not DE   | not DE   | not DE |
| EVM0000082 | LG9 | isochorismatase hydrolase fam     | not DE   | not DE   | not DE   | not DE |
| EVM0016017 | LG9 | late embryogenesis abundant p     | 2.315361 | 0.009254 | not DE   | not DE |
| EVM0005119 | LG9 | maternal effect uncoordinatio     | not DE   | not DE   | not DE   | not DE |
| EVM0002247 | LG9 | mitogen-activated protein kin     | not DE   | not DE   | not DE   | not DE |
| EVM0014316 | LG9 | phosphofructokinase               | -1.37496 | 0.000618 | -1.11716 | #####  |
| EVM0017048 | LG9 | phospholipase D alpha             | not DE   | not DE   | not DE   | not DE |
| EVM0012878 | LG9 | photosystem I 11K family prot     | -2.04646 | 6.73E-06 | not DE   | not DE |
| EVM0022770 | LG9 | polypeptide deformylase, puta     | not DE   | not DE   | not DE   | not DE |
| EVM0018049 | LG9 | putative DnaJ protein             | not DE   | not DE   | not DE   | not DE |
| EVM0002598 | LG9 | putative disease resistance g     | not DE   | not DE   | not DE   | not DE |
| EVM0003647 | LG9 | putative disease resistance g     | not DE   | not DE   | not DE   | not DE |
| EVM0013332 | LG9 | quinic acid O-hydroxycinnamoyltra | not DE   | not DE   | not DE   | not DE |
| EVM0010136 | LG9 | ribosomal protein S19             | not DE   | not DE   | not DE   | not DE |
| EVM0018790 | LG9 | serine-threonine protein kina     | not DE   | not DE   | not DE   | not DE |
| EVM0004170 | LG9 | unknown protein                   | not DE   | not DE   | not DE   | not DE |
| EVM0004892 | LG9 | unknown protein                   | not DE   | not DE   | not DE   | not DE |
| EVM0007167 | LG9 | unknown protein                   | not DE   | not DE   | not DE   | not DE |

|            |      |                                      |          |          |          |         |
|------------|------|--------------------------------------|----------|----------|----------|---------|
| EVM0007293 | LG9  | unknown protein                      | not DE   | not DE   | not DE   | not DE  |
| EVM0007842 | LG9  | unknown protein                      | not DE   | not DE   | not DE   | not DE  |
| EVM0008507 | LG9  | unknown protein                      | not DE   | not DE   | not DE   | not DE  |
| EVM0009042 | LG9  | unknown protein                      | not DE   | not DE   | not DE   | not DE  |
| EVM0009066 | LG9  | unknown protein                      | not DE   | not DE   | not DE   | not DE  |
| EVM0009405 | LG9  | unknown protein                      | not DE   | not DE   | not DE   | not DE  |
| EVM0009952 | LG9  | unknown protein                      | not DE   | not DE   | not DE   | not DE  |
| EVM0011470 | LG9  | unknown protein                      | not DE   | not DE   | not DE   | not DE  |
| EVM0011677 | LG9  | unknown protein                      | not DE   | not DE   | not DE   | not DE  |
| EVM0013008 | LG9  | unknown protein                      | not DE   | not DE   | not DE   | not DE  |
| EVM0014133 | LG9  | unknown protein                      | not DE   | not DE   | not DE   | not DE  |
| EVM0014709 | LG9  | unknown protein                      | not DE   | not DE   | not DE   | not DE  |
| EVM0015460 | LG9  | unknown protein                      | not DE   | not DE   | not DE   | not DE  |
| EVM0016086 | LG9  | unknown protein                      | not DE   | not DE   | not DE   | not DE  |
| EVM0017103 | LG9  | unknown protein                      | not DE   | not DE   | not DE   | not DE  |
| EVM0018785 | LG9  | unknown protein                      | not DE   | not DE   | not DE   | not DE  |
| EVM0019164 | LG9  | unknown protein                      | not DE   | not DE   | not DE   | not DE  |
| EVM0020111 | LG9  | unknown protein                      | not DE   | not DE   | not DE   | not DE  |
| EVM0022019 | LG9  | unknown protein                      | not DE   | not DE   | not DE   | not DE  |
| EVM0022168 | LG9  | unknown protein                      | not DE   | not DE   | not DE   | not DE  |
| EVM0022219 | LG9  | unknown protein                      | not DE   | not DE   | not DE   | not DE  |
| EVM0023679 | LG9  | unknown protein                      | not DE   | not DE   | not DE   | not DE  |
| EVM0023733 | LG9  | unknown protein                      | not DE   | not DE   | not DE   | not DE  |
| EVM0024067 | LG9  | unknown protein                      | not DE   | not DE   | not DE   | not DE  |
| EVM0024159 | LG9  | unknown protein                      | not DE   | not DE   | not DE   | not DE  |
| EVM0000058 | LG9  | unnamed protein product              | not DE   | not DE   | not DE   | not DE  |
| EVM0000292 | LG9  | unnamed protein product              | not DE   | not DE   | not DE   | not DE  |
| EVM0001655 | LG9  | unnamed protein product              | not DE   | not DE   | not DE   | not DE  |
| EVM0002428 | LG9  | unnamed protein product              | not DE   | not DE   | not DE   | not DE  |
| EVM0004022 | LG9  | unnamed protein product              | not DE   | not DE   | not DE   | not DE  |
| EVM0009370 | LG9  | unnamed protein product              | not DE   | not DE   | not DE   | not DE  |
| EVM0009805 | LG9  | unnamed protein product              | not DE   | not DE   | not DE   | not DE  |
| EVM0010674 | LG9  | unnamed protein product              | -4.24159 | 4.48E-09 | -2.28731 | 0.00058 |
| EVM0019194 | LG9  | unnamed protein product              | not DE   | not DE   | not DE   | not DE  |
| EVM0019402 | LG9  | unnamed protein product              | not DE   | not DE   | not DE   | not DE  |
| EVM0019732 | LG9  | unnamed protein product              | not DE   | not DE   | not DE   | not DE  |
| EVM0020589 | LG9  | unnamed protein product              | not DE   | not DE   | not DE   | not DE  |
| EVM0022452 | LG9  | unnamed protein product              | not DE   | not DE   | not DE   | not DE  |
| EVM0013222 | LG9  | zinc finger family protein           | not DE   | not DE   | not DE   | not DE  |
| EVM0013510 | LG9  | zinc finger family protein           | not DE   | not DE   | not DE   | not DE  |
| EVM0015018 | LG9  | zinc finger protein, putative        | not DE   | not DE   | not DE   | not DE  |
| EVM0019130 | LG9  | zinc finger protein, putative        | not DE   | not DE   | not DE   | not DE  |
| EVM0004590 | LGUn | (E,E)-geranylinalool synthase        | not DE   | not DE   | not DE   | not DE  |
| EVM0008314 | LGUn | (E,E)-geranylinalool synthase        | not DE   | not DE   | not DE   | not DE  |
| EVM0015085 | LGUn | (E,E)-geranylinalool synthase        | not DE   | not DE   | not DE   | not DE  |
| EVM0019665 | LGUn | (E,E)-geranylinalool synthase        | not DE   | not DE   | not DE   | not DE  |
| EVM0014572 | LGUn | (R)-limonene synthase 1-like         | not DE   | not DE   | not DE   | not DE  |
| EVM0011741 | LGUn | 1-acyl-sn-glycerol-3-phosphate       | not DE   | not DE   | not DE   | not DE  |
| EVM0008157 | LGUn | 11-beta-hydroxysteroid dehydrogenase | not DE   | not DE   | not DE   | not DE  |
| EVM0009450 | LGUn | 14 kDa proline-rich protein          | not DE   | not DE   | not DE   | not DE  |
| EVM0008959 | LGUn | 21 kDa protein-like                  | not DE   | not DE   | not DE   | not DE  |
| EVM0024569 | LGUn | 21 kDa protein-like                  | not DE   | not DE   | not DE   | not DE  |
| EVM0018278 | LGUn | 39S ribosomal protein L41-A,         | not DE   | not DE   | not DE   | not DE  |
| EVM0011131 | LGUn | 40S ribosomal protein S14            | not DE   | not DE   | not DE   | not DE  |

|            |      |                              |        |        |        |        |
|------------|------|------------------------------|--------|--------|--------|--------|
| EVM0010010 | LGUn | 40S ribosomal protein S25-li | not DE | not DE | not DE | not DE |
| EVM0005245 | LGUn | 40S ribosomal protein S5-2-l | not DE | not DE | not DE | not DE |
| EVM0017021 | LGUn | 50S ribosomal protein L12, c | not DE | not DE | not DE | not DE |
| EVM0013134 | LGUn | 50S ribosomal protein L21, m | not DE | not DE | not DE | not DE |
| EVM0001470 | LGUn | 6-phosphofructokinase 5, chl | not DE | not DE | not DE | not DE |
| EVM0003225 | LGUn | 60S ribosomal protein L21-2- | not DE | not DE | not DE | not DE |
| EVM0012688 | LGUn | 60S ribosomal protein L27a-3 | not DE | not DE | not DE | not DE |
| EVM0008952 | LGUn | 60S ribosomal protein L9-lik | not DE | not DE | not DE | not DE |
| EVM0005900 | LGUn | ABC transporter A family mem | not DE | not DE | not DE | not DE |
| EVM0007441 | LGUn | ABC transporter A family mem | not DE | not DE | not DE | not DE |
| EVM0020084 | LGUn | ABC transporter G family mem | not DE | not DE | not DE | not DE |
| EVM0024625 | LGUn | ABC transporter G family mem | not DE | not DE | not DE | not DE |
| EVM0017265 | LGUn | ABC transporter G family mem | not DE | not DE | not DE | not DE |
| EVM0018345 | LGUn | ADP-ribosylation factor 1-li | not DE | not DE | not DE | not DE |
| EVM0016419 | LGUn | ATP synthase gamma chain, ch | not DE | not DE | not DE | not DE |
| EVM0009487 | LGUn | CBS domain-containing protei | not DE | not DE | not DE | not DE |
| EVM0016466 | LGUn | CBS domain-containing protei | not DE | not DE | not DE | not DE |
| EVM0019388 | LGUn | CBS domain-containing protei | not DE | not DE | not DE | not DE |
| EVM0017557 | LGUn | COBRA-like protein 6-like    | not DE | not DE | not DE | not DE |
| EVM0024046 | LGUn | CRC domain-containing protei | not DE | not DE | not DE | not DE |
| EVM0000382 | LGUn | CWF19-like protein 2-like    | not DE | not DE | not DE | not DE |
| EVM0020851 | LGUn | DAG protein, chloroplastic-l | not DE | not DE | not DE | not DE |
| EVM0001699 | LGUn | DNA damage-binding protein l | not DE | not DE | not DE | not DE |
| EVM0020057 | LGUn | DNA polymerase zeta catalyti | not DE | not DE | not DE | not DE |
| EVM0021244 | LGUn | DNA primase small subunit-li | not DE | not DE | not DE | not DE |
| EVM0014436 | LGUn | DNA repair and recombination | not DE | not DE | not DE | not DE |
| EVM0011154 | LGUn | DNA topoisomerase 3-alpha-li | not DE | not DE | not DE | not DE |
| EVM0002291 | LGUn | DNA-directed RNA polymerase  | not DE | not DE | not DE | not DE |
| EVM0000302 | LGUn | E3 ubiquitin-protein ligase  | not DE | not DE | not DE | not DE |
| EVM0002712 | LGUn | E3 ubiquitin-protein ligase  | not DE | not DE | not DE | not DE |
| EVM0006147 | LGUn | E3 ubiquitin-protein ligase  | not DE | not DE | not DE | not DE |
| EVM0020732 | LGUn | E3 ubiquitin-protein ligase  | not DE | not DE | not DE | not DE |
| EVM0000254 | LGUn | E3 ubiquitin-protein ligase  | not DE | not DE | not DE | not DE |
| EVM0008489 | LGUn | ENHANCER OF AG-4 protein 2-l | not DE | not DE | not DE | not DE |
| EVM0007447 | LGUn | ER membrane protein complex  | not DE | not DE | not DE | not DE |
| EVM0004973 | LGUn | F-box protein CPR30-like     | not DE | not DE | not DE | not DE |
| EVM0011325 | LGUn | F-box protein CPR30-like     | not DE | not DE | not DE | not DE |
| EVM0024301 | LGUn | F-box protein CPR30-like     | not DE | not DE | not DE | not DE |
| EVM0009272 | LGUn | F-box protein CPR30-like isc | not DE | not DE | not DE | not DE |
| EVM0024074 | LGUn | F-box protein CPR30-like isc | not DE | not DE | not DE | not DE |
| EVM0012346 | LGUn | F-box/LRR-repeat protein At4 | not DE | not DE | not DE | not DE |
| EVM0012989 | LGUn | G patch domain-containing pr | not DE | not DE | not DE | not DE |
| EVM0000552 | LGUn | G-type lectin S-receptor-lik | not DE | not DE | not DE | not DE |
| EVM0016251 | LGUn | G-type lectin S-receptor-lik | not DE | not DE | not DE | not DE |
| EVM0010922 | LGUn | GDP-mannose transporter GONS | not DE | not DE | not DE | not DE |
| EVM0013079 | LGUn | GDP-mannose transporter GONS | not DE | not DE | not DE | not DE |
| EVM0024640 | LGUn | GDP-mannose transporter GONS | not DE | not DE | not DE | not DE |
| EVM0009725 | LGUn | GDP-mannose transporter GONS | not DE | not DE | not DE | not DE |
| EVM0010318 | LGUn | GDSL esterase/lipase At5g036 | not DE | not DE | not DE | not DE |
| EVM0011024 | LGUn | GDSL esterase/lipase At5g036 | not DE | not DE | not DE | not DE |
| EVM0004420 | LGUn | GDSL esterase/lipase At5g144 | not DE | not DE | not DE | not DE |
| EVM0013956 | LGUn | GDSL esterase/lipase At5g144 | not DE | not DE | not DE | not DE |
| EVM0008822 | LGUn | L-ascorbate oxidase-like     | not DE | not DE | not DE | not DE |
| EVM0011494 | LGUn | LOB domain-containing protei | not DE | not DE | not DE | not DE |

|            |      |                               |        |        |          |         |
|------------|------|-------------------------------|--------|--------|----------|---------|
| EVM0015260 | LGUn | LOW QUALITY PROTEIN: N-acetyl | not DE | not DE | not DE   | not DE  |
| EVM0006467 | LGUn | LOW QUALITY PROTEIN: unchara  | not DE | not DE | not DE   | not DE  |
| EVM0010205 | LGUn | NADH dehydrogenase            | not DE | not DE | not DE   | not DE  |
| EVM0002380 | LGUn | O-acyltransferase WSD1-like   | not DE | not DE | not DE   | not DE  |
| EVM0022171 | LGUn | O-acyltransferase WSD1-like   | not DE | not DE | not DE   | not DE  |
| EVM0018679 | LGUn | PTI1-like tyrosine-protein k  | not DE | not DE | not DE   | not DE  |
| EVM0022203 | LGUn | RING-H2 finger protein ATL52  | not DE | not DE | not DE   | not DE  |
| EVM0020695 | LGUn | RNA-binding protein 8A-like   | not DE | not DE | not DE   | not DE  |
| EVM0024379 | LGUn | RNA-binding protein 8A-like   | not DE | not DE | not DE   | not DE  |
| EVM0011863 | LGUn | SPX and EXS domain-containin  | not DE | not DE | not DE   | not DE  |
| EVM0016610 | LGUn | SPX domain-containing membra  | not DE | not DE | not DE   | not DE  |
| EVM0022734 | LGUn | TMV resistance protein N-lik  | not DE | not DE | not DE   | not DE  |
| EVM0000821 | LGUn | U-box domain-containing prot  | not DE | not DE | not DE   | not DE  |
| EVM0009222 | LGUn | U-box domain-containing prot  | not DE | not DE | not DE   | not DE  |
| EVM0010195 | LGUn | U-box domain-containing prot  | not DE | not DE | not DE   | not DE  |
| EVM0000822 | LGUn | U1 small nuclear ribonucleop  | not DE | not DE | not DE   | not DE  |
| EVM0000130 | LGUn | UDP-glucuronate:xylan alpha-  | not DE | not DE | not DE   | not DE  |
| EVM0012883 | LGUn | UPF0483 protein CG5412-like   | not DE | not DE | not DE   | not DE  |
| EVM0012375 | LGUn | WD repeat-containing protein  | not DE | not DE | not DE   | not DE  |
| EVM0021144 | LGUn | WD repeat-containing protein  | not DE | not DE | not DE   | not DE  |
| EVM0003579 | LGUn | Werner syndrome ATP-dependen  | not DE | not DE | not DE   | not DE  |
| EVM0004942 | LGUn | acetyl-CoA-benzylalcohol ace  | not DE | not DE | not DE   | not DE  |
| EVM0002092 | LGUn | acyl-CoA-binding protein      | not DE | not DE | not DE   | not DE  |
| EVM0022896 | LGUn | aldose 1-epimerase-like       | not DE | not DE | not DE   | not DE  |
| EVM0024458 | LGUn | alpha-1,6-mannosyl-glycoprot  | not DE | not DE | not DE   | not DE  |
| EVM0016137 | LGUn | alpha-farnesene synthase-lik  | not DE | not DE | not DE   | not DE  |
| EVM0006703 | LGUn | anaphase-promoting complex s  | not DE | not DE | not DE   | not DE  |
| EVM0006929 | LGUn | ankyrin repeat-containing pr  | not DE | not DE | not DE   | not DE  |
| EVM0013199 | LGUn | argininosuccinate lyase, chl  | not DE | not DE | not DE   | not DE  |
| EVM0021929 | LGUn | argininosuccinate lyase, chl  | not DE | not DE | not DE   | not DE  |
| EVM0011151 | LGUn | aspartic proteinase Asp1-lik  | not DE | not DE | not DE   | not DE  |
| EVM0001286 | LGUn | beta-galactosidase 16-like    | not DE | not DE | not DE   | not DE  |
| EVM0001365 | LGUn | beta-glucosidase 44-like      | not DE | not DE | not DE   | not DE  |
| EVM0013546 | LGUn | beta-glucosidase 44-like      | not DE | not DE | not DE   | not DE  |
| EVM0015808 | LGUn | bifunctional 3-dehydroquinat  | not DE | not DE | not DE   | not DE  |
| EVM0011080 | LGUn | bifunctional riboflavin bios  | not DE | not DE | not DE   | not DE  |
| EVM0004449 | LGUn | biogenesis of lysosome-relat  | not DE | not DE | not DE   | not DE  |
| EVM0019184 | LGUn | biogenesis of lysosome-relat  | not DE | not DE | not DE   | not DE  |
| EVM0007521 | LGUn | biorientation of chromosomes  | not DE | not DE | not DE   | not DE  |
| EVM0011775 | LGUn | biorientation of chromosomes  | not DE | not DE | not DE   | not DE  |
| EVM0013138 | LGUn | biorientation of chromosomes  | not DE | not DE | not DE   | not DE  |
| EVM0009914 | LGUn | calcium-dependent protein ki  | not DE | not DE | not DE   | not DE  |
| EVM0009519 | LGUn | calponin homology domain-con  | not DE | not DE | -1.39341 | 0.00072 |
| EVM0000062 | LGUn | calvin cycle protein CPI2-1,  | not DE | not DE | not DE   | not DE  |
| EVM0013178 | LGUn | cell wall protein AWA1-like   | not DE | not DE | not DE   | not DE  |
| EVM0015530 | LGUn | cellulose synthase A catalyt  | not DE | not DE | not DE   | not DE  |
| EVM0002682 | LGUn | centromere-associated protei  | not DE | not DE | not DE   | not DE  |
| EVM0023484 | LGUn | centrosomal protein of 83 kD  | not DE | not DE | not DE   | not DE  |
| EVM0004566 | LGUn | chaperone protein ClpB1       | not DE | not DE | not DE   | not DE  |
| EVM0003859 | LGUn | chlorophyll(ide) b reductase  | not DE | not DE | not DE   | not DE  |
| EVM0018042 | LGUn | choline monooxygenase, chlor  | not DE | not DE | not DE   | not DE  |
| EVM0007205 | LGUn | chromosome-associated kinesin | not DE | not DE | not DE   | not DE  |
| EVM0020629 | LGUn | chromosome-associated kinesin | not DE | not DE | not DE   | not DE  |
| EVM0003012 | LGUn | classical arabinogalactan pr  | not DE | not DE | not DE   | not DE  |

|            |      |                              |          |          |          |        |
|------------|------|------------------------------|----------|----------|----------|--------|
| EVM0020686 | LGUn | classical arabinogalactan pr | not DE   | not DE   | not DE   | not DE |
| EVM0004166 | LGUn | classical arabinogalactan pr | not DE   | not DE   | not DE   | not DE |
| EVM0006506 | LGUn | clathrin light chain 3-like  | not DE   | not DE   | not DE   | not DE |
| EVM0014944 | LGUn | cleavage and polyadenylation | not DE   | not DE   | not DE   | not DE |
| EVM0002828 | LGUn | cold-inducible RNA-binding p | not DE   | not DE   | not DE   | not DE |
| EVM0000905 | LGUn | cyclin-B2-4-like             | not DE   | not DE   | not DE   | not DE |
| EVM0018905 | LGUn | cyclin-D2-1                  | not DE   | not DE   | not DE   | not DE |
| EVM0011032 | LGUn | cyclin-dependent kinase inh  | not DE   | not DE   | not DE   | not DE |
| EVM0005243 | LGUn | cytokinin riboside 5&apos;m  | not DE   | not DE   | not DE   | not DE |
| EVM0014912 | LGUn | cytosolic sulfotransferase l | not DE   | not DE   | not DE   | not DE |
| EVM0020885 | LGUn | dehydration-responsive elem  | not DE   | not DE   | not DE   | not DE |
| EVM0020672 | LGUn | dehydration-responsive elem  | not DE   | not DE   | not DE   | not DE |
| EVM0007232 | LGUn | dentin sialophosphoprotein-l | not DE   | not DE   | not DE   | not DE |
| EVM0022886 | LGUn | dentin sialophosphoprotein-l | not DE   | not DE   | not DE   | not DE |
| EVM0020760 | LGUn | dnaJ homolog subfamily B mem | -3.71319 | 1.02E-15 | -2.05072 | #####  |
| EVM0016139 | LGUn | dol-P-Man:Man(7)GlcNAc(2)-PP | not DE   | not DE   | not DE   | not DE |
| EVM0002866 | LGUn | dynein light chain 2, cytopl | not DE   | not DE   | not DE   | not DE |
| EVM0003030 | LGUn | elongation factor G, chlorop | not DE   | not DE   | not DE   | not DE |
| EVM0008797 | LGUn | embryogenesis-associated pro | not DE   | not DE   | not DE   | not DE |
| EVM0015403 | LGUn | ethylene-responsive transcri | not DE   | not DE   | not DE   | not DE |
| EVM0019345 | LGUn | ethylene-responsive transcri | not DE   | not DE   | not DE   | not DE |
| EVM0023024 | LGUn | ethylene-responsive transcri | not DE   | not DE   | not DE   | not DE |
| EVM0016798 | LGUn | eukaryotic peptide chain rel | 1.634157 | 0.049632 | not DE   | not DE |
| EVM0001877 | LGUn | eukaryotic translation initi | not DE   | not DE   | not DE   | not DE |
| EVM0013900 | LGUn | eukaryotic translation initi | not DE   | not DE   | not DE   | not DE |
| EVM0017961 | LGUn | exocyst complex component EX | not DE   | not DE   | not DE   | not DE |
| EVM0024514 | LGUn | exocyst complex component SE | not DE   | not DE   | not DE   | not DE |
| EVM0003423 | LGUn | exopolygalacturonase-like    | not DE   | not DE   | not DE   | not DE |
| EVM0006484 | LGUn | expansin-A4-like             | not DE   | not DE   | not DE   | not DE |
| EVM0019256 | LGUn | expansin-like A1-like        | not DE   | not DE   | not DE   | not DE |
| EVM0023360 | LGUn | exportin-4-like isoform X4   | not DE   | not DE   | not DE   | not DE |
| EVM0023519 | LGUn | fatty-acid-binding protein l | not DE   | not DE   | not DE   | not DE |
| EVM0018911 | LGUn | ferredoxin-3, chloroplasti   | not DE   | not DE   | not DE   | not DE |
| EVM0008725 | LGUn | formin-like protein 20       | -1.11461 | 0.007952 | not DE   | not DE |
| EVM0010477 | LGUn | geraniol 8-hydroxylase-like  | not DE   | not DE   | not DE   | not DE |
| EVM0016118 | LGUn | geraniol 8-hydroxylase-like  | not DE   | not DE   | not DE   | not DE |
| EVM0022260 | LGUn | geraniol 8-hydroxylase-like  | not DE   | not DE   | not DE   | not DE |
| EVM0001389 | LGUn | glucose-6-phosphate/phosphat | not DE   | not DE   | not DE   | not DE |
| EVM0010906 | LGUn | glutamate receptor 2.8-like  | not DE   | not DE   | not DE   | not DE |
| EVM0019978 | LGUn | glycerophosphodiester phosph | not DE   | not DE   | not DE   | not DE |
| EVM0018994 | LGUn | glycine-rich RNA-binding pro | not DE   | not DE   | not DE   | not DE |
| EVM0013094 | LGUn | glycine-rich RNA-binding pro | not DE   | not DE   | not DE   | not DE |
| EVM0023427 | LGUn | glycoprotein 3-alpha-L-fucos | not DE   | not DE   | not DE   | not DE |
| EVM0017585 | LGUn | heat shock cognate 70 kDa pr | not DE   | not DE   | not DE   | not DE |
| EVM0015064 | LGUn | heat stress transcription fa | not DE   | not DE   | not DE   | not DE |
| EVM0002850 | LGUn | histidine--tRNA ligase, cyto | not DE   | not DE   | not DE   | not DE |
| EVM0009385 | LGUn | histone H2AX-like            | not DE   | not DE   | not DE   | not DE |
| EVM0022589 | LGUn | homogentisate phytyltransfer | not DE   | not DE   | not DE   | not DE |
| EVM0003735 | LGUn | inner centromere protein-lik | not DE   | not DE   | not DE   | not DE |
| EVM0019132 | LGUn | inositol-phosphate phosphata | not DE   | not DE   | not DE   | not DE |
| EVM0016803 | LGUn | integrator complex subunit 3 | not DE   | not DE   | not DE   | not DE |
| EVM0004218 | LGUn | isoamylase 3, chloroplasti   | not DE   | not DE   | not DE   | not DE |
| EVM0008559 | LGUn | kinesin-like calmodulin-bind | not DE   | not DE   | not DE   | not DE |
| EVM0018339 | LGUn | kinesin-like calmodulin-bind | not DE   | not DE   | not DE   | not DE |

|            |      |                                  |        |        |        |        |
|------------|------|----------------------------------|--------|--------|--------|--------|
| EVM0015764 | LGUn | kinesin-like protein KIF18B-     | not DE | not DE | not DE | not DE |
| EVM0013673 | LGUn | leucoanthocyanidin dioxygenase   | not DE | not DE | not DE | not DE |
| EVM0012264 | LGUn | linoleate 13S-lipoxygenase 3     | not DE | not DE | not DE | not DE |
| EVM0003732 | LGUn | lysine--tRNA ligase              | not DE | not DE | not DE | not DE |
| EVM0019354 | LGUn | magnesium transporter MRS2-I     | not DE | not DE | not DE | not DE |
| EVM0014345 | LGUn | mavicyanin-like                  | not DE | not DE | not DE | not DE |
| EVM0023290 | LGUn | mavicyanin-like                  | not DE | not DE | not DE | not DE |
| EVM0017292 | LGUn | mediator of RNA polymerase I     | not DE | not DE | not DE | not DE |
| EVM0000943 | LGUn | mediator of RNA polymerase I     | not DE | not DE | not DE | not DE |
| EVM0005402 | LGUn | methionine S-methyltransferase   | not DE | not DE | not DE | not DE |
| EVM0016794 | LGUn | methylthioribose kinase-like     | not DE | not DE | not DE | not DE |
| EVM0003308 | LGUn | mitochondrial protein import     | not DE | not DE | not DE | not DE |
| EVM0012659 | LGUn | mitochondrial protein import     | not DE | not DE | not DE | not DE |
| EVM0021779 | LGUn | mitochondrial protein import     | not DE | not DE | not DE | not DE |
| EVM0024436 | LGUn | mitogen-activated protein kinase | not DE | not DE | not DE | not DE |
| EVM0023352 | LGUn | nucleolysin TIAR-like            | not DE | not DE | not DE | not DE |
| EVM0003384 | LGUn | nudix hydrolase 14, chloroplast  | not DE | not DE | not DE | not DE |
| EVM0020934 | LGUn | ocs element-binding factor 1     | not DE | not DE | not DE | not DE |
| EVM0016599 | LGUn | p21-activated protein kinase     | not DE | not DE | not DE | not DE |
| EVM0002241 | LGUn | patatin group M-2-like           | not DE | not DE | not DE | not DE |
| EVM0001711 | LGUn | pathogenesis-related homeodomain | not DE | not DE | not DE | not DE |
| EVM0013980 | LGUn | pectinesterase 2                 | not DE | not DE | not DE | not DE |
| EVM0021437 | LGUn | pentatricopeptide repeat-conn    | not DE | not DE | not DE | not DE |
| EVM0012039 | LGUn | pentatricopeptide repeat-conn    | not DE | not DE | not DE | not DE |
| EVM0024212 | LGUn | pentatricopeptide repeat-conn    | not DE | not DE | not DE | not DE |
| EVM0021173 | LGUn | pentatricopeptide repeat-conn    | not DE | not DE | not DE | not DE |
| EVM0004622 | LGUn | pentatricopeptide repeat-conn    | not DE | not DE | not DE | not DE |
| EVM0023318 | LGUn | pentatricopeptide repeat-conn    | not DE | not DE | not DE | not DE |
| EVM0023710 | LGUn | pentatricopeptide repeat-conn    | not DE | not DE | not DE | not DE |
| EVM0015315 | LGUn | pentatricopeptide repeat-conn    | not DE | not DE | not DE | not DE |
| EVM0002471 | LGUn | pentatricopeptide repeat-conn    | not DE | not DE | not DE | not DE |
| EVM0000285 | LGUn | pentatricopeptide repeat-conn    | not DE | not DE | not DE | not DE |
| EVM0009195 | LGUn | pentatricopeptide repeat-conn    | not DE | not DE | not DE | not DE |
| EVM0013554 | LGUn | pentatricopeptide repeat-conn    | not DE | not DE | not DE | not DE |
| EVM0015121 | LGUn | peroxidase A2-like               | not DE | not DE | not DE | not DE |
| EVM0021258 | LGUn | peroxidase A2-like               | not DE | not DE | not DE | not DE |
| EVM0012794 | LGUn | phosphatidylinositol 4-phosph    | not DE | not DE | not DE | not DE |
| EVM0004202 | LGUn | phosphatidylinositol 4-phosph    | not DE | not DE | not DE | not DE |
| EVM0022825 | LGUn | phosphatidylinositol/phosphat    | not DE | not DE | not DE | not DE |
| EVM0005743 | LGUn | phosphoenolpyruvate/phosphat     | not DE | not DE | not DE | not DE |
| EVM0019979 | LGUn | phosphoribulokinase, chlorop     | not DE | not DE | not DE | not DE |
| EVM0018628 | LGUn | pistil-specific extensin-like    | not DE | not DE | not DE | not DE |
| EVM0024300 | LGUn | polyglutamine-binding protein    | not DE | not DE | not DE | not DE |
| EVM0020313 | LGUn | polyol transporter 5-like        | not DE | not DE | not DE | not DE |
| EVM0024473 | LGUn | polyubiquitin-like isoform X     | not DE | not DE | not DE | not DE |
| EVM0015814 | LGUn | probable ADP-ribosylation fact   | not DE | not DE | not DE | not DE |
| EVM0022819 | LGUn | probable BOI-related E3 ubiqu    | not DE | not DE | not DE | not DE |
| EVM0008155 | LGUn | probable LRR receptor-like s     | not DE | not DE | not DE | not DE |
| EVM0011128 | LGUn | probable WRKY transcription      | not DE | not DE | not DE | not DE |
| EVM0006042 | LGUn | probable acyl-activating enz     | not DE | not DE | not DE | not DE |
| EVM0014010 | LGUn | probable beta-1,3-galactosyl     | not DE | not DE | not DE | not DE |
| EVM0014152 | LGUn | probable copper-transporting     | not DE | not DE | not DE | not DE |
| EVM0013363 | LGUn | probable cyclic nucleotide-g     | not DE | not DE | not DE | not DE |
| EVM0018542 | LGUn | probable glycosyltransferase     | not DE | not DE | not DE | not DE |

|            |      |                               |          |          |        |        |
|------------|------|-------------------------------|----------|----------|--------|--------|
| EVM0014065 | LGUn | probable histone H2A variant  | not DE   | not DE   | not DE | not DE |
| EVM0014096 | LGUn | probable lipid-A-disaccharid  | not DE   | not DE   | not DE | not DE |
| EVM0014986 | LGUn | probable methionine--tRNA li  | not DE   | not DE   | not DE | not DE |
| EVM0014600 | LGUn | probable methyltransferase P  | not DE   | not DE   | not DE | not DE |
| EVM0005410 | LGUn | probable methyltransferase P  | not DE   | not DE   | not DE | not DE |
| EVM0007693 | LGUn | probable methyltransferase P  | not DE   | not DE   | not DE | not DE |
| EVM0013208 | LGUn | probable polygalacturonase n  | not DE   | not DE   | not DE | not DE |
| EVM0007581 | LGUn | probable protein phosphatase  | not DE   | not DE   | not DE | not DE |
| EVM0016730 | LGUn | probable receptor-like prote  | not DE   | not DE   | not DE | not DE |
| EVM0009539 | LGUn | probable serine/threonine pr  | not DE   | not DE   | not DE | not DE |
| EVM0007445 | LGUn | probable serine/threonine-pr  | not DE   | not DE   | not DE | not DE |
| EVM0009503 | LGUn | probable xyloglucan endotran  | not DE   | not DE   | not DE | not DE |
| EVM0024261 | LGUn | probably inactive leucine-ri  | not DE   | not DE   | not DE | not DE |
| EVM0020163 | LGUn | protein FAM91A1               | not DE   | not DE   | not DE | not DE |
| EVM0022535 | LGUn | protein FAR-RED IMPAIRED RES  | not DE   | not DE   | not DE | not DE |
| EVM0007797 | LGUn | protein GLUTAMINE DUMPER 1-l  | not DE   | not DE   | not DE | not DE |
| EVM0010293 | LGUn | protein IRX15-like            | not DE   | not DE   | not DE | not DE |
| EVM0016604 | LGUn | protein RALF-like 19          | not DE   | not DE   | not DE | not DE |
| EVM0017784 | LGUn | protein ROOT PRIMORDIUM DEFE  | not DE   | not DE   | not DE | not DE |
| EVM0024064 | LGUn | protein TIC 40, chloroplasti  | not DE   | not DE   | not DE | not DE |
| EVM0004823 | LGUn | protein disulfide isomerase-  | not DE   | not DE   | not DE | not DE |
| EVM0017399 | LGUn | protein kinase PVPK-1-like    | not DE   | not DE   | not DE | not DE |
| EVM0003425 | LGUn | protein odr-4 homolog         | not DE   | not DE   | not DE | not DE |
| EVM0009228 | LGUn | protein strawberry notch-lik  | not DE   | not DE   | not DE | not DE |
| EVM0022241 | LGUn | protochlorophyllide-dependen  | not DE   | not DE   | not DE | not DE |
| EVM0000214 | LGUn | putative M025-like protein A  | 6.220579 | 0.000401 | not DE | not DE |
| EVM0016478 | LGUn | putative S-adenosyl-L-methio  | not DE   | not DE   | not DE | not DE |
| EVM0003159 | LGUn | putative disease resistance   | not DE   | not DE   | not DE | not DE |
| EVM0011129 | LGUn | putative exosome complex com  | not DE   | not DE   | not DE | not DE |
| EVM0001098 | LGUn | putative glucose-6-phosphate  | not DE   | not DE   | not DE | not DE |
| EVM0011450 | LGUn | putative glucuronosyltransfe  | not DE   | not DE   | not DE | not DE |
| EVM0000644 | LGUn | putative pentatricopeptide r  | not DE   | not DE   | not DE | not DE |
| EVM0009631 | LGUn | putative pentatricopeptide r  | not DE   | not DE   | not DE | not DE |
| EVM0011996 | LGUn | putative receptor-like prote  | not DE   | not DE   | not DE | not DE |
| EVM0002937 | LGUn | putative tyrosine-protein ph  | not DE   | not DE   | not DE | not DE |
| EVM0022017 | LGUn | putative uncharacterized pro  | not DE   | not DE   | not DE | not DE |
| EVM0006882 | LGUn | pyridoxal biosynthesis prote  | not DE   | not DE   | not DE | not DE |
| EVM0004194 | LGUn | ras-related protein Rab11C-l  | not DE   | not DE   | not DE | not DE |
| EVM0000651 | LGUn | receptor-like protein kinase  | not DE   | not DE   | not DE | not DE |
| EVM0023997 | LGUn | receptor-like protein kinase  | not DE   | not DE   | not DE | not DE |
| EVM0002593 | LGUn | receptor-like protein kinase  | not DE   | not DE   | not DE | not DE |
| EVM0005962 | LGUn | regulator of nonsense transcr | not DE   | not DE   | not DE | not DE |
| EVM0009260 | LGUn | regulator of nonsense transcr | not DE   | not DE   | not DE | not DE |
| EVM0014414 | LGUn | regulator of nonsense transcr | not DE   | not DE   | not DE | not DE |
| EVM0019961 | LGUn | regulator of nonsense transcr | not DE   | not DE   | not DE | not DE |
| EVM0021018 | LGUn | regulator of nonsense transcr | not DE   | not DE   | not DE | not DE |
| EVM0004993 | LGUn | rhodanese-like/PpiC domain-c  | not DE   | not DE   | not DE | not DE |
| EVM0024494 | LGUn | ribokinase-like isoform X3    | not DE   | not DE   | not DE | not DE |
| EVM0004995 | LGUn | secologanin synthase-like     | not DE   | not DE   | not DE | not DE |
| EVM0023629 | LGUn | serine carboxypeptidase 24-l  | not DE   | not DE   | not DE | not DE |
| EVM0023931 | LGUn | serine carboxypeptidase 24-l  | not DE   | not DE   | not DE | not DE |
| EVM0009788 | LGUn | serine carboxypeptidase-like  | not DE   | not DE   | not DE | not DE |
| EVM0022284 | LGUn | serine carboxypeptidase-like  | not DE   | not DE   | not DE | not DE |
| EVM0000091 | LGUn | serine/threonine-protein kin  | not DE   | not DE   | not DE | not DE |

|            |      |                                                 |        |          |        |        |
|------------|------|-------------------------------------------------|--------|----------|--------|--------|
| EVM0021618 | LGUn | serine/threonine-protein kinase                 | not DE | not DE   | not DE | not DE |
| EVM0019080 | LGUn | serine/threonine-protein phosphatase            | not DE | not DE   | not DE | not DE |
| EVM0022758 | LGUn | set1/Ash2 histone methyltransferase             | not DE | not DE   | not DE | not DE |
| EVM0023894 | LGUn | shaggy-related protein kinase                   | not DE | not DE   | not DE | not DE |
| EVM0012836 | LGUn | sister chromatid cohesion protein 2             | 585961 | 0.005611 | not DE | not DE |
| EVM0003845 | LGUn | sodium channel and clathrin-binding protein     | not DE | not DE   | not DE | not DE |
| EVM0024350 | LGUn | soluble starch synthase 3, chloroplast          | not DE | not DE   | not DE | not DE |
| EVM0002861 | LGUn | splicing factor 3A subunit 2                    | not DE | not DE   | not DE | not DE |
| EVM0002367 | LGUn | structural maintenance of chromosomes protein 1 | not DE | not DE   | not DE | not DE |
| EVM0012191 | LGUn | subtilisin-like protease-like protein           | not DE | not DE   | not DE | not DE |
| EVM0023424 | LGUn | superoxide dismutase                            | not DE | not DE   | not DE | not DE |
| EVM0017950 | LGUn | synaptonemal complex protein                    | not DE | not DE   | not DE | not DE |
| EVM0014241 | LGUn | tRNA (adenine(58)-N(1))-methylesterase          | not DE | not DE   | not DE | not DE |
| EVM0007636 | LGUn | tRNA 2'-phosphotransferase                      | not DE | not DE   | not DE | not DE |
| EVM0008825 | LGUn | tRNA wybutosine-synthesizing enzyme             | not DE | not DE   | not DE | not DE |
| EVM0009400 | LGUn | telomere repeat-binding factor 1                | not DE | not DE   | not DE | not DE |
| EVM0015565 | LGUn | thaumatin-like protein 1-like protein           | not DE | not DE   | not DE | not DE |
| EVM0003120 | LGUn | threonine synthase, chloroplast                 | not DE | not DE   | not DE | not DE |
| EVM0017866 | LGUn | topless-related protein 3-like protein          | not DE | not DE   | not DE | not DE |
| EVM0015990 | LGUn | transcription factor BIM1-like protein          | not DE | not DE   | not DE | not DE |
| EVM0021719 | LGUn | transcription factor BIM1-like protein          | not DE | not DE   | not DE | not DE |
| EVM0021001 | LGUn | transcription factor CPC-like protein           | not DE | not DE   | not DE | not DE |
| EVM0020390 | LGUn | transcription factor MYB39-like protein         | not DE | not DE   | not DE | not DE |
| EVM0023446 | LGUn | transcription factor bHLH47-like protein        | not DE | not DE   | not DE | not DE |
| EVM0018012 | LGUn | transcription factor bHLH96-like protein        | not DE | not DE   | not DE | not DE |
| EVM0017078 | LGUn | transcription factor-like protein               | not DE | not DE   | not DE | not DE |
| EVM0005267 | LGUn | transcription initiation factor 1               | not DE | not DE   | not DE | not DE |
| EVM0018953 | LGUn | transmembrane protein 184C-like protein         | not DE | not DE   | not DE | not DE |
| EVM0010748 | LGUn | transmembrane protein 56 isoform 1              | not DE | not DE   | not DE | not DE |
| EVM0004563 | LGUn | trehalase-like isoform X2                       | not DE | not DE   | not DE | not DE |
| EVM0024626 | LGUn | type I inositol 1,4,5-trisphosphate 3-kinase    | not DE | not DE   | not DE | not DE |
| EVM0017912 | LGUn | tyrosine--tRNA ligase, cytoplasmic              | not DE | not DE   | not DE | not DE |
| EVM0016661 | LGUn | ubiquitin receptor RAD23b-like protein          | not DE | not DE   | not DE | not DE |
| EVM0021585 | LGUn | ubiquitin-conjugating enzyme E2                 | not DE | not DE   | not DE | not DE |
| EVM0014661 | LGUn | ubiquitin-like protein 5                        | not DE | not DE   | not DE | not DE |
| EVM0003053 | LGUn | ubiquitin-like protein ATG12                    | not DE | not DE   | not DE | not DE |
| EVM0007781 | LGUn | ubiquitin-related modifier 1                    | not DE | not DE   | not DE | not DE |
| EVM0000985 | LGUn | uncharacterized membrane protein                | not DE | not DE   | not DE | not DE |
| EVM0019905 | LGUn | uncharacterized protein At1g10200               | not DE | not DE   | not DE | not DE |
| EVM0010785 | LGUn | uncharacterized protein At1g10200               | not DE | not DE   | not DE | not DE |
| EVM0020897 | LGUn | uncharacterized protein At2g10200               | not DE | not DE   | not DE | not DE |
| EVM0008791 | LGUn | uncharacterized protein At3g10200               | not DE | not DE   | not DE | not DE |
| EVM0004000 | LGUn | uncharacterized protein At4g10200               | not DE | not DE   | not DE | not DE |
| EVM0013063 | LGUn | uncharacterized protein At4g10200               | not DE | not DE   | not DE | not DE |
| EVM0006773 | LGUn | uncharacterized protein C6C3                    | not DE | not DE   | not DE | not DE |
| EVM0001455 | LGUn | uncharacterized protein LOC101928200            | not DE | not DE   | not DE | not DE |
| EVM0020772 | LGUn | uncharacterized protein LOC101928200            | not DE | not DE   | not DE | not DE |
| EVM0012433 | LGUn | uncharacterized protein LOC101928200            | not DE | not DE   | not DE | not DE |
| EVM0017672 | LGUn | uncharacterized protein LOC101928200            | not DE | not DE   | not DE | not DE |
| EVM0010920 | LGUn | uncharacterized protein LOC101928200            | not DE | not DE   | not DE | not DE |
| EVM0009467 | LGUn | uncharacterized protein LOC101928200            | not DE | not DE   | not DE | not DE |
| EVM0016182 | LGUn | uncharacterized protein LOC101928200            | not DE | not DE   | not DE | not DE |
| EVM0012334 | LGUn | uncharacterized protein LOC101928200            | not DE | not DE   | not DE | not DE |
| EVM0007368 | LGUn | uncharacterized protein LOC101928200            | not DE | not DE   | not DE | not DE |





|            |      |                               |        |        |           |          |
|------------|------|-------------------------------|--------|--------|-----------|----------|
| EVM0014130 | LGUn | uncharacterized protein LOC1  | not DE | not DE | not DE    | not DE   |
| EVM0006058 | LGUn | uncharacterized protein LOC1  | not DE | not DE | not DE    | not DE   |
| EVM0001340 | LGUn | uncharacterized protein LOC1  | not DE | not DE | not DE    | not DE   |
| EVM0002693 | LGUn | uncharacterized protein LOC1  | not DE | not DE | not DE    | not DE   |
| EVM0016583 | LGUn | uncharacterized protein LOC1  | not DE | not DE | not DE    | not DE   |
| EVM0007806 | LGUn | uncharacterized protein LOC1  | not DE | not DE | not DE    | not DE   |
| EVM0016753 | LGUn | uncharacterized protein LOC1  | not DE | not DE | not DE    | not DE   |
| EVM0003047 | LGUn | uncharacterized protein LOC1  | not DE | not DE | not DE    | not DE   |
| EVM0002415 | LGUn | uncharacterized protein LOC1  | not DE | not DE | not DE    | not DE   |
| EVM0010200 | LGUn | uncharacterized protein LOC1  | not DE | not DE | not DE    | not DE   |
| EVM0014555 | LGUn | uncharacterized protein LOC1  | not DE | not DE | not DE    | not DE   |
| EVM0022545 | LGUn | uncharacterized protein LOC1  | not DE | not DE | not DE    | not DE   |
| EVM0013655 | LGUn | uncharacterized protein LOC1  | not DE | not DE | not DE    | not DE   |
| EVM0016410 | LGUn | uncharacterized protein LOC1  | not DE | not DE | not DE    | not DE   |
| EVM0007126 | LGUn | uncharacterized protein LOC1  | not DE | not DE | not DE    | not DE   |
| EVM0006710 | LGUn | uncharacterized transporter   | not DE | not DE | not DE    | not DE   |
| EVM0019426 | LGUn | uridine kinase-like protein   | not DE | not DE | not DE    | not DE   |
| EVM0010081 | LGUn | vacuolar-processing enzyme-l  | not DE | not DE | not DE    | not DE   |
| EVM0007462 | LGUn | vicianin hydrolase-like       | not DE | not DE | not DE    | not DE   |
| EVM0002180 | LGUn | wall-associated receptor kin  | not DE | not DE | not DE    | not DE   |
| EVM0012055 | LGUn | wall-associated receptor kin  | not DE | not DE | not DE    | not DE   |
| EVM0016068 | LGUn | xanthine dehydrogenase 1-lik  | not DE | not DE | not DE    | not DE   |
| EVM0004177 | LGUn | zinc finger CCCH domain-cont  | not DE | not DE | not DE    | not DE   |
| EVM0021193 | LGUn | zinc finger CCCH domain-cont  | not DE | not DE | 4. 473831 | 0. 00036 |
| EVM0007400 | LGUn | zinc finger CCCH domain-cont  | not DE | not DE | not DE    | not DE   |
| EVM0020288 | LGUn | zinc finger protein 4-like    | not DE | not DE | not DE    | not DE   |
| EVM0015041 | LGUn | zinc finger protein 593 hom   | not DE | not DE | not DE    | not DE   |
| EVM0010116 | LGUn | zinc finger protein CONSTANS  | not DE | not DE | not DE    | not DE   |
| EVM0016065 | LGUn | 1,6-rhamnosyltransferase      | not DE | not DE | not DE    | not DE   |
| EVM0003373 | LGUn | 14 kDa proline-rich protein D | not DE | not DE | not DE    | not DE   |
| EVM0008759 | LGUn | 3-hydroxy-3-methylglutaryl co | not DE | not DE | not DE    | not DE   |
| EVM0001983 | LGUn | 40S ribosomal protein S16A    | not DE | not DE | not DE    | not DE   |
| EVM0001475 | LGUn | 6-phosphofructokinase 3       | not DE | not DE | not DE    | not DE   |
| EVM0005342 | LGUn | ABC transporter family protei | not DE | not DE | not DE    | not DE   |
| EVM0019550 | LGUn | ABC transporter family protei | not DE | not DE | not DE    | not DE   |
| EVM0024395 | LGUn | ACD1-like                     | not DE | not DE | not DE    | not DE   |
| EVM0004588 | LGUn | AP2 domain-containing transcr | not DE | not DE | not DE    | not DE   |
| EVM0018636 | LGUn | AP2/ERF domain-containing tra | not DE | not DE | not DE    | not DE   |
| EVM0000248 | LGUn | ASH1-related protein 2, putat | not DE | not DE | not DE    | not DE   |
| EVM0018079 | LGUn | AT-hook DNA-binding family pr | not DE | not DE | not DE    | not DE   |
| EVM0003795 | LGUn | Abscisic acid &apos;-hydroxy  | not DE | not DE | not DE    | not DE   |
| EVM0023018 | LGUn | Actin-like ATPase superfamily | not DE | not DE | not DE    | not DE   |
| EVM0013773 | LGUn | Actin-related protein 7 isof  | not DE | not DE | not DE    | not DE   |
| EVM0002485 | LGUn | Alpha carbonic anhydrase 7 is | not DE | not DE | not DE    | not DE   |
| EVM0007869 | LGUn | Alpha carbonic anhydrase 7 is | not DE | not DE | not DE    | not DE   |
| EVM0021446 | LGUn | Alpha carbonic anhydrase 7 is | not DE | not DE | not DE    | not DE   |
| EVM0013568 | LGUn | Ankyrin repeat family protei  | not DE | not DE | not DE    | not DE   |
| EVM0001585 | LGUn | Ankyrin repeat-containing pro | not DE | not DE | not DE    | not DE   |
| EVM0000776 | LGUn | Annexin-like protein RJ4 isof | not DE | not DE | not DE    | not DE   |
| EVM0015174 | LGUn | Ataxia-telangiectasia mutated | not DE | not DE | not DE    | not DE   |
| EVM0001297 | LGUn | BZIP transcription factor fam | not DE | not DE | not DE    | not DE   |
| EVM0024584 | LGUn | Basic helix-loop-helix DNA-bi | not DE | not DE | not DE    | not DE   |
| EVM0001803 | LGUn | Basic helix-loop-helix DNA-bi | not DE | not DE | not DE    | not DE   |
| EVM0013975 | LGUn | Basic helix-loop-helix DNA-bi | not DE | not DE | not DE    | not DE   |

|            |      |                                            |          |          |          |         |
|------------|------|--------------------------------------------|----------|----------|----------|---------|
| EVM0012095 | LGUn | Basic pentacysteine 7, putative            | not DE   | not DE   | not DE   | not DE  |
| EVM0005884 | LGUn | Beta glucosidase 41 isoform 1              | not DE   | not DE   | not DE   | not DE  |
| EVM0001050 | LGUn | BnaC04g34550D                              | not DE   | not DE   | not DE   | not DE  |
| EVM0024385 | LGUn | C2H2 and C2HC zinc fingers superfamily     | not DE   | not DE   | not DE   | not DE  |
| EVM0008540 | LGUn | CONSTANS-like 4                            | not DE   | not DE   | not DE   | not DE  |
| EVM0018183 | LGUn | Cak assembly factor, putative              | not DE   | not DE   | not DE   | not DE  |
| EVM0020414 | LGUn | Calmegin                                   | 2.438058 | 0.004106 | not DE   | not DE  |
| EVM0010952 | LGUn | Carbohydrate-binding X8 domain             | not DE   | not DE   | not DE   | not DE  |
| EVM0008927 | LGUn | Coiled-coil domain-containing protein      | not DE   | not DE   | not DE   | not DE  |
| EVM0016773 | LGUn | Copper binding protein 9, putative         | not DE   | not DE   | not DE   | not DE  |
| EVM0016578 | LGUn | Cyclin-like family protein                 | not DE   | not DE   | not DE   | not DE  |
| EVM0013234 | LGUn | Cys/Met metabolism pyridoxal-5-phosphate   | not DE   | not DE   | not DE   | not DE  |
| EVM0007042 | LGUn | Cysteine/Histidine-rich C1 domain          | not DE   | not DE   | not DE   | not DE  |
| EVM0009435 | LGUn | Cytochrome P450, family 706, subfamily 1   | not DE   | not DE   | not DE   | not DE  |
| EVM0018798 | LGUn | Cytochrome P450, family 706, subfamily 2   | not DE   | not DE   | not DE   | not DE  |
| EVM0020722 | LGUn | Cytochrome c oxidase polypeptide I         | not DE   | not DE   | not DE   | not DE  |
| EVM0015299 | LGUn | DNA-directed RNA polymerase I              | not DE   | not DE   | not DE   | not DE  |
| EVM0012122 | LGUn | DNA-directed RNA polymerase subunit 1      | not DE   | not DE   | not DE   | not DE  |
| EVM0016287 | LGUn | Derlin-2, putative                         | not DE   | not DE   | not DE   | not DE  |
| EVM0014745 | LGUn | Dof-type zinc finger DNA-binding protein   | not DE   | not DE   | not DE   | not DE  |
| EVM0011330 | LGUn | Drought-responsive family protein          | not DE   | not DE   | not DE   | not DE  |
| EVM0001698 | LGUn | Duplicated homeodomain-like sequence       | not DE   | not DE   | not DE   | not DE  |
| EVM0008454 | LGUn | ELF4-like 4                                | not DE   | not DE   | not DE   | not DE  |
| EVM0008189 | LGUn | Epidermal growth factor receptor           | not DE   | not DE   | not DE   | not DE  |
| EVM0020873 | LGUn | Extra-large GTP-binding protein            | not DE   | not DE   | not DE   | not DE  |
| EVM0001388 | LGUn | F1504.13                                   | not DE   | not DE   | not DE   | not DE  |
| EVM0004671 | LGUn | Fatty acid amide hydrolase                 | not DE   | not DE   | not DE   | not DE  |
| EVM0013459 | LGUn | Fatty acid amide hydrolase                 | not DE   | not DE   | not DE   | not DE  |
| EVM0015023 | LGUn | Fatty acid amide hydrolase                 | not DE   | not DE   | not DE   | not DE  |
| EVM0015633 | LGUn | Fatty acid amide hydrolase                 | not DE   | not DE   | not DE   | not DE  |
| EVM0013031 | LGUn | Fimbriata                                  | not DE   | not DE   | not DE   | not DE  |
| EVM0017575 | LGUn | Fimbriata                                  | not DE   | not DE   | not DE   | not DE  |
| EVM0018891 | LGUn | Fimbriata                                  | not DE   | not DE   | not DE   | not DE  |
| EVM0024465 | LGUn | Fimbriata                                  | not DE   | not DE   | not DE   | not DE  |
| EVM0002540 | LGUn | Folic acid and derivative biosynthesis     | not DE   | not DE   | not DE   | not DE  |
| EVM0021925 | LGUn | GDSL-motif lipase 7                        | not DE   | not DE   | not DE   | not DE  |
| EVM0000326 | LGUn | GPN-loop GTPase 2                          | not DE   | not DE   | not DE   | not DE  |
| EVM0008807 | LGUn | GRAS54 protein                             | not DE   | not DE   | not DE   | not DE  |
| EVM0023195 | LGUn | GRAS54 protein                             | not DE   | not DE   | not DE   | not DE  |
| EVM0009701 | LGUn | Glutamate receptor 2.7, putative           | not DE   | not DE   | not DE   | not DE  |
| EVM0002553 | LGUn | HVA22-like protein a, putative             | not DE   | not DE   | not DE   | not DE  |
| EVM0011767 | LGUn | HVA22-like protein a, putative             | not DE   | not DE   | not DE   | not DE  |
| EVM0010684 | LGUn | Heat shock protein STI                     | not DE   | not DE   | not DE   | not DE  |
| EVM0002315 | LGUn | Homeobox-leucine zipper protein            | not DE   | not DE   | -2.17009 | 0.01322 |
| EVM0019808 | LGUn | IQ-domain 21, putative isoform 1           | not DE   | not DE   | not DE   | not DE  |
| EVM0006920 | LGUn | Indole-3-acetic acid inducible protein     | not DE   | not DE   | not DE   | not DE  |
| EVM0001185 | LGUn | Integrase-type DNA-binding subunit         | not DE   | not DE   | not DE   | not DE  |
| EVM0022237 | LGUn | Iron(III)-zinc(II) purple acid phosphatase | not DE   | not DE   | not DE   | not DE  |
| EVM0016806 | LGUn | Jasmonate-zim-domain protein               | not DE   | not DE   | not DE   | not DE  |
| EVM0018927 | LGUn | L-ascorbate peroxidase T isoform 1         | not DE   | not DE   | not DE   | not DE  |
| EVM0020773 | LGUn | L-ascorbate peroxidase T isoform 2         | not DE   | not DE   | not DE   | not DE  |
| EVM0022953 | LGUn | L-ascorbate peroxidase T isoform 3         | not DE   | not DE   | not DE   | not DE  |
| EVM0002758 | LGUn | Leucine-rich repeat protein kinase         | not DE   | not DE   | not DE   | not DE  |
| EVM0001538 | LGUn | Low affinity potassium transporter         | not DE   | not DE   | not DE   | not DE  |

|            |      |                               |          |          |          |         |
|------------|------|-------------------------------|----------|----------|----------|---------|
| EVM0004108 | LGUn | Major facilitator superfamily | not DE   | not DE   | not DE   | not DE  |
| EVM0011782 | LGUn | Major facilitator superfamily | not DE   | not DE   | not DE   | not DE  |
| EVM0001352 | LGUn | Metal tolerance 5             | not DE   | not DE   | not DE   | not DE  |
| EVM0009875 | LGUn | Methyl-CpG-binding domain 4   | not DE   | not DE   | not DE   | not DE  |
| EVM0001164 | LGUn | Methylcrotonyl-CoA carboxylas | not DE   | not DE   | not DE   | not DE  |
| EVM0007378 | LGUn | Methylcrotonyl-CoA carboxylas | not DE   | not DE   | not DE   | not DE  |
| EVM0018479 | LGUn | Methylcrotonyl-CoA carboxylas | not DE   | not DE   | not DE   | not DE  |
| EVM0001189 | LGUn | Myb domain protein 23         | not DE   | not DE   | 1.327868 | 0.01496 |
| EVM0005553 | LGUn | Myb domain protein 86         | not DE   | not DE   | not DE   | not DE  |
| EVM0008524 | LGUn | Myzus persicae-induced lipase | not DE   | not DE   | not DE   | not DE  |
| EVM0013069 | LGUn | Myzus persicae-induced lipase | not DE   | not DE   | not DE   | not DE  |
| EVM0019217 | LGUn | Myzus persicae-induced lipase | not DE   | not DE   | not DE   | not DE  |
| EVM0021393 | LGUn | NAC domain containing protein | not DE   | not DE   | not DE   | not DE  |
| EVM0003190 | LGUn | NAD(P)H dehydrogenase C1 isof | not DE   | not DE   | not DE   | not DE  |
| EVM0018419 | LGUn | NAD(P)H dehydrogenase C1 isof | not DE   | not DE   | not DE   | not DE  |
| EVM0019658 | LGUn | NAD(P)H dehydrogenase C1 isof | not DE   | not DE   | not DE   | not DE  |
| EVM0021506 | LGUn | NADH dehydrogenase subunit 7  | -1.9275  | 0.016214 | not DE   | not DE  |
| EVM0014136 | LGUn | Nucleotide-diphospho-sugar tr | not DE   | not DE   | not DE   | not DE  |
| EVM0019949 | LGUn | Nucleotide-diphospho-sugar tr | not DE   | not DE   | not DE   | not DE  |
| EVM0004320 | LGUn | Osmotin-like protein          | not DE   | not DE   | not DE   | not DE  |
| EVM0001315 | LGUn | PGPD14 isoform 1              | not DE   | not DE   | 4.10921  | 0.01404 |
| EVM0021970 | LGUn | PSII reaction center subunit  | not DE   | not DE   | not DE   | not DE  |
| EVM0001919 | LGUn | Pectin lyase-like superfamily | not DE   | not DE   | not DE   | not DE  |
| EVM0013286 | LGUn | Pectin lyase-like superfamily | not DE   | not DE   | not DE   | not DE  |
| EVM0006031 | LGUn | Peroxidase 3                  | not DE   | not DE   | not DE   | not DE  |
| EVM0011514 | LGUn | Phosphatidylinositol-speciwc  | not DE   | not DE   | not DE   | not DE  |
| EVM0011960 | LGUn | Photosystem I subunit K       | -2.75801 | 0.004425 | not DE   | not DE  |
| EVM0005652 | LGUn | Pis v 1 allergen 2S albumin   | not DE   | not DE   | not DE   | not DE  |
| EVM0003177 | LGUn | Polynucleotidyl transferase,  | not DE   | not DE   | not DE   | not DE  |
| EVM0001304 | LGUn | Polyribonucleotide nucleotidy | not DE   | not DE   | not DE   | not DE  |
| EVM0007326 | LGUn | Polyribonucleotide nucleotidy | not DE   | not DE   | not DE   | not DE  |
| EVM0024078 | LGUn | Polyubiquitin-A               | not DE   | not DE   | not DE   | not DE  |
| EVM0003153 | LGUn | Pre-mRNA processing ribonucle | not DE   | not DE   | not DE   | not DE  |
| EVM0013705 | LGUn | Protease degQ precursor, puta | not DE   | not DE   | not DE   | not DE  |
| EVM0005784 | LGUn | Proteinase inhibitor          | not DE   | not DE   | not DE   | not DE  |
| EVM0016485 | LGUn | Putative mediator of RNA poly | not DE   | not DE   | not DE   | not DE  |
| EVM0002032 | LGUn | Putative xyloglucan endotrans | not DE   | not DE   | not DE   | not DE  |
| EVM0004414 | LGUn | RING finger protein, putative | not DE   | not DE   | not DE   | not DE  |
| EVM0003606 | LGUn | RING-H2 finger protein        | not DE   | not DE   | not DE   | not DE  |
| EVM0011512 | LGUn | RING/FYVE/PHD zinc finger sup | not DE   | not DE   | not DE   | not DE  |
| EVM0004217 | LGUn | RING/FYVE/PHD zinc finger sup | not DE   | not DE   | not DE   | not DE  |
| EVM0020246 | LGUn | RING/U-box superfamily protei | not DE   | not DE   | not DE   | not DE  |
| EVM0021154 | LGUn | RING/U-box superfamily protei | not DE   | not DE   | not DE   | not DE  |
| EVM0014124 | LGUn | Ran BP2/NZF zinc finger-like  | not DE   | not DE   | not DE   | not DE  |
| EVM0000368 | LGUn | RecName: Full=Probable U6 snR | not DE   | not DE   | not DE   | not DE  |
| EVM0010426 | LGUn | RecName: Full=Probable U6 snR | not DE   | not DE   | not DE   | not DE  |
| EVM0012178 | LGUn | RecName: Full=Probable bifunc | not DE   | not DE   | not DE   | not DE  |
| EVM0011191 | LGUn | Regulator of nonsense transcr | not DE   | not DE   | not DE   | not DE  |
| EVM0008023 | LGUn | RmlC-like cupins superfamily  | not DE   | not DE   | not DE   | not DE  |
| EVM0017572 | LGUn | RmlC-like cupins superfamily  | not DE   | not DE   | not DE   | not DE  |
| EVM0017089 | LGUn | S-adenosyl-L-methionine-depen | not DE   | not DE   | not DE   | not DE  |
| EVM0015034 | LGUn | SAUR-like auxin-responsive pr | not DE   | not DE   | not DE   | not DE  |
| EVM0003864 | LGUn | SNARE-like superfamily protei | not DE   | not DE   | not DE   | not DE  |
| EVM0005371 | LGUn | SOUL heme-binding family prot | not DE   | not DE   | not DE   | not DE  |

|            |      |                                        |          |          |        |        |
|------------|------|----------------------------------------|----------|----------|--------|--------|
| EVM0010289 | LGUn | Scarecrow-like 3                       | not DE   | not DE   | not DE | not DE |
| EVM0022572 | LGUn | Serine/threonine-protein kinase        | not DE   | not DE   | not DE | not DE |
| EVM0022085 | LGUn | Serine/threonine-protein phosphatase   | not DE   | not DE   | not DE | not DE |
| EVM0014114 | LGUn | Set1/Ash2 histone methyltransferase    | not DE   | not DE   | not DE | not DE |
| EVM0010021 | LGUn | Structural constituent of ribosome     | not DE   | not DE   | not DE | not DE |
| EVM0015828 | LGUn | Structural maintenance of chromosomes  | not DE   | not DE   | not DE | not DE |
| EVM0013054 | LGUn | Sulfate/thiosulfate import ATPase      | not DE   | not DE   | not DE | not DE |
| EVM0006267 | LGUn | TCP family transcription factor        | not DE   | not DE   | not DE | not DE |
| EVM0005194 | LGUn | T070-3                                 | not DE   | not DE   | not DE | not DE |
| EVM0009114 | LGUn | T070-3                                 | not DE   | not DE   | not DE | not DE |
| EVM0015758 | LGUn | T070-3                                 | not DE   | not DE   | not DE | not DE |
| EVM0024240 | LGUn | Teosinte branched 1, putative          | not DE   | not DE   | not DE | not DE |
| EVM0007464 | LGUn | Tetratricopeptide repeat (TPR)         | not DE   | not DE   | not DE | not DE |
| EVM0022399 | LGUn | Tetratricopeptide repeat (TPR)         | not DE   | not DE   | not DE | not DE |
| EVM0000599 | LGUn | Thioredoxin superfamily protein        | not DE   | not DE   | not DE | not DE |
| EVM0003210 | LGUn | Thioredoxin superfamily protein        | not DE   | not DE   | not DE | not DE |
| EVM0003793 | LGUn | Tonoplast intrinsic protein 5          | not DE   | not DE   | not DE | not DE |
| EVM0000405 | LGUn | Triosephosphate isomerase isoform      | not DE   | not DE   | not DE | not DE |
| EVM0003353 | LGUn | Tubulin beta-6 chain                   | not DE   | not DE   | not DE | not DE |
| EVM0022104 | LGUn | Tubulin gamma complex-associated       | not DE   | not DE   | not DE | not DE |
| EVM0001284 | LGUn | Tyrosine/DOPA decarboxylase            | not DE   | not DE   | not DE | not DE |
| EVM0002120 | LGUn | UDP-D-glucose/UDP-D-galactose          | not DE   | not DE   | not DE | not DE |
| EVM0007480 | LGUn | UDP-Glycosyltransferase superfamily    | not DE   | not DE   | not DE | not DE |
| EVM0018122 | LGUn | UNC-50 family protein isoform          | not DE   | not DE   | not DE | not DE |
| EVM0009643 | LGUn | Ubiquitin E2 variant 1D-4              | not DE   | not DE   | not DE | not DE |
| EVM0012522 | LGUn | Uncharacterized protein TCM_0          | not DE   | not DE   | not DE | not DE |
| EVM0014229 | LGUn | Uncharacterized protein TCM_0          | not DE   | not DE   | not DE | not DE |
| EVM0022536 | LGUn | Uncharacterized protein TCM_0          | not DE   | not DE   | not DE | not DE |
| EVM0005705 | LGUn | Uncharacterized protein TCM_0          | not DE   | not DE   | not DE | not DE |
| EVM0006608 | LGUn | Uncharacterized protein TCM_0          | not DE   | not DE   | not DE | not DE |
| EVM0017599 | LGUn | Uncharacterized protein TCM_0          | not DE   | not DE   | not DE | not DE |
| EVM0019717 | LGUn | Uncharacterized protein TCM_0          | not DE   | not DE   | not DE | not DE |
| EVM0022322 | LGUn | Uncharacterized protein TCM_0          | not DE   | not DE   | not DE | not DE |
| EVM0019151 | LGUn | Uncharacterized protein TCM_0          | -1.35417 | 0.000247 | not DE | not DE |
| EVM0001571 | LGUn | Uncharacterized protein isoform        | not DE   | not DE   | not DE | not DE |
| EVM0014552 | LGUn | Uncharacterized protein isoform        | not DE   | not DE   | not DE | not DE |
| EVM0003213 | LGUn | VQ motif-containing protein,           | not DE   | not DE   | not DE | not DE |
| EVM0012695 | LGUn | VQ motif-containing protein,           | not DE   | not DE   | not DE | not DE |
| EVM0023786 | LGUn | Vacuolar protein sorting 45            | not DE   | not DE   | not DE | not DE |
| EVM0007115 | LGUn | WRKY DNA-binding protein 7 isoform     | not DE   | not DE   | not DE | not DE |
| EVM0008255 | LGUn | WRKY DNA-binding protein 7 isoform     | not DE   | not DE   | not DE | not DE |
| EVM0005607 | LGUn | WRKY transcription factor 26           | not DE   | not DE   | not DE | not DE |
| EVM0014079 | LGUn | WRKY1                                  | not DE   | not DE   | not DE | not DE |
| EVM0006795 | LGUn | Winged-helix DNA-binding transcription | not DE   | not DE   | not DE | not DE |
| EVM0019801 | LGUn | Winged-helix DNA-binding transcription | not DE   | not DE   | not DE | not DE |
| EVM0018809 | LGUn | Zinc finger family protein, putative   | not DE   | not DE   | not DE | not DE |
| EVM0017892 | LGUn | alcohol dehydrogenase, putative        | not DE   | not DE   | not DE | not DE |
| EVM0005308 | LGUn | ankyrin repeat-containing protein      | not DE   | not DE   | not DE | not DE |
| EVM0001704 | LGUn | basic helix-loop-helix family          | not DE   | not DE   | not DE | not DE |
| EVM0024273 | LGUn | beta-glucosidase                       | not DE   | not DE   | not DE | not DE |
| EVM0006725 | LGUn | bifunctional purine biosynthesis       | not DE   | not DE   | not DE | not DE |
| EVM0019516 | LGUn | calcium binding protein/cast, putative | not DE   | not DE   | not DE | not DE |
| EVM0005925 | LGUn | calmodulin binding protein, putative   | not DE   | not DE   | not DE | not DE |
| EVM0020365 | LGUn | calmodulin binding protein, putative   | not DE   | not DE   | not DE | not DE |

|            |      |                                  |        |        |          |         |
|------------|------|----------------------------------|--------|--------|----------|---------|
| EVM0023284 | LGUn | caspase, putative                | not DE | not DE | not DE   | not DE  |
| EVM0002152 | LGUn | catalase                         | not DE | not DE | -1.64434 | 0.04864 |
| EVM0024165 | LGUn | chloride channel-like family     | not DE | not DE | not DE   | not DE  |
| EVM0003529 | LGUn | clock-associated PAS protein     | not DE | not DE | not DE   | not DE  |
| EVM0000402 | LGUn | conserved hypothetical protein   | not DE | not DE | not DE   | not DE  |
| EVM0003077 | LGUn | conserved hypothetical protein   | not DE | not DE | not DE   | not DE  |
| EVM0003396 | LGUn | conserved hypothetical protein   | not DE | not DE | not DE   | not DE  |
| EVM0004750 | LGUn | conserved hypothetical protein   | not DE | not DE | not DE   | not DE  |
| EVM0008928 | LGUn | conserved hypothetical protein   | not DE | not DE | not DE   | not DE  |
| EVM0009096 | LGUn | conserved hypothetical protein   | not DE | not DE | not DE   | not DE  |
| EVM0016069 | LGUn | conserved hypothetical protein   | not DE | not DE | not DE   | not DE  |
| EVM0018532 | LGUn | conserved hypothetical protein   | not DE | not DE | not DE   | not DE  |
| EVM0019715 | LGUn | conserved hypothetical protein   | not DE | not DE | not DE   | not DE  |
| EVM0020040 | LGUn | conserved hypothetical protein   | not DE | not DE | not DE   | not DE  |
| EVM0020518 | LGUn | conserved hypothetical protein   | not DE | not DE | not DE   | not DE  |
| EVM0008970 | LGUn | copper/zinc-superoxide dismutase | not DE | not DE | not DE   | not DE  |
| EVM0000094 | LGUn | cytochrome P450 CYP94A1 family   | not DE | not DE | not DE   | not DE  |
| EVM0003394 | LGUn | cytochrome P450 CYP94A1 family   | not DE | not DE | not DE   | not DE  |
| EVM0019934 | LGUn | ferredoxin--NADP reductase, p    | not DE | not DE | not DE   | not DE  |
| EVM0002817 | LGUn | fruit weight 2.2-1 protein       | not DE | not DE | not DE   | not DE  |
| EVM0001489 | LGUn | gag/pol protein                  | not DE | not DE | not DE   | not DE  |
| EVM0023849 | LGUn | galactosyltransferase family     | not DE | not DE | not DE   | not DE  |
| EVM0003392 | LGUn | hydrolase, hydrolyzing O-glyc    | not DE | not DE | not DE   | not DE  |
| EVM0017069 | LGUn | hypothetical protein AMTR_s03    | not DE | not DE | not DE   | not DE  |
| EVM0009838 | LGUn | hypothetical protein BofuT4_P    | not DE | not DE | not DE   | not DE  |
| EVM0015480 | LGUn | hypothetical protein CICLE_v1    | not DE | not DE | not DE   | not DE  |
| EVM0007857 | LGUn | hypothetical protein CICLE_v1    | not DE | not DE | not DE   | not DE  |
| EVM0016037 | LGUn | hypothetical protein CICLE_v1    | not DE | not DE | not DE   | not DE  |
| EVM0019798 | LGUn | hypothetical protein CICLE_v1    | not DE | not DE | not DE   | not DE  |
| EVM0014917 | LGUn | hypothetical protein CICLE_v1    | not DE | not DE | not DE   | not DE  |
| EVM0003486 | LGUn | hypothetical protein CICLE_v1    | not DE | not DE | not DE   | not DE  |
| EVM0012593 | LGUn | hypothetical protein CICLE_v1    | not DE | not DE | not DE   | not DE  |
| EVM0022150 | LGUn | hypothetical protein CICLE_v1    | not DE | not DE | not DE   | not DE  |
| EVM0012641 | LGUn | hypothetical protein CICLE_v1    | not DE | not DE | not DE   | not DE  |
| EVM0022529 | LGUn | hypothetical protein CICLE_v1    | not DE | not DE | not DE   | not DE  |
| EVM0012258 | LGUn | hypothetical protein CICLE_v1    | not DE | not DE | not DE   | not DE  |
| EVM0014559 | LGUn | hypothetical protein CICLE_v1    | not DE | not DE | not DE   | not DE  |
| EVM0012297 | LGUn | hypothetical protein CICLE_v1    | not DE | not DE | not DE   | not DE  |
| EVM0023008 | LGUn | hypothetical protein CICLE_v1    | not DE | not DE | not DE   | not DE  |
| EVM0002761 | LGUn | hypothetical protein CICLE_v1    | not DE | not DE | not DE   | not DE  |
| EVM0013695 | LGUn | hypothetical protein CICLE_v1    | not DE | not DE | not DE   | not DE  |
| EVM0009858 | LGUn | hypothetical protein CICLE_v1    | not DE | not DE | not DE   | not DE  |
| EVM0019306 | LGUn | hypothetical protein CICLE_v1    | not DE | not DE | not DE   | not DE  |
| EVM0000259 | LGUn | hypothetical protein CICLE_v1    | not DE | not DE | not DE   | not DE  |
| EVM0012058 | LGUn | hypothetical protein CICLE_v1    | not DE | not DE | not DE   | not DE  |
| EVM0003663 | LGUn | hypothetical protein CICLE_v1    | not DE | not DE | not DE   | not DE  |
| EVM0018738 | LGUn | hypothetical protein CICLE_v1    | not DE | not DE | not DE   | not DE  |
| EVM0017267 | LGUn | hypothetical protein CICLE_v1    | not DE | not DE | not DE   | not DE  |
| EVM0008134 | LGUn | hypothetical protein CICLE_v1    | not DE | not DE | not DE   | not DE  |
| EVM0013766 | LGUn | hypothetical protein CICLE_v1    | not DE | not DE | not DE   | not DE  |
| EVM0022690 | LGUn | hypothetical protein CICLE_v1    | not DE | not DE | not DE   | not DE  |
| EVM0005669 | LGUn | hypothetical protein CICLE_v1    | not DE | not DE | not DE   | not DE  |
| EVM0001690 | LGUn | hypothetical protein CICLE_v1    | not DE | not DE | not DE   | not DE  |
| EVM0018664 | LGUn | hypothetical protein CICLE_v1    | not DE | not DE | not DE   | not DE  |

|            |      |                               |          |         |          |         |
|------------|------|-------------------------------|----------|---------|----------|---------|
| EVM0020778 | LGUn | hypothetical protein CICLE_v1 | not DE   | not DE  | not DE   | not DE  |
| EVM0018315 | LGUn | hypothetical protein CICLE_v1 | not DE   | not DE  | not DE   | not DE  |
| EVM0003870 | LGUn | hypothetical protein CICLE_v1 | not DE   | not DE  | not DE   | not DE  |
| EVM0008323 | LGUn | hypothetical protein CICLE_v1 | not DE   | not DE  | 1.593714 | 0.03267 |
| EVM0010073 | LGUn | hypothetical protein CICLE_v1 | not DE   | not DE  | not DE   | not DE  |
| EVM0010188 | LGUn | hypothetical protein CICLE_v1 | not DE   | not DE  | not DE   | not DE  |
| EVM0008578 | LGUn | hypothetical protein CICLE_v1 | not DE   | not DE  | not DE   | not DE  |
| EVM0009441 | LGUn | hypothetical protein CICLE_v1 | not DE   | not DE  | not DE   | not DE  |
| EVM0018044 | LGUn | hypothetical protein CICLE_v1 | not DE   | not DE  | not DE   | not DE  |
| EVM0019754 | LGUn | hypothetical protein CICLE_v1 | not DE   | not DE  | not DE   | not DE  |
| EVM0002058 | LGUn | hypothetical protein CICLE_v1 | not DE   | not DE  | not DE   | not DE  |
| EVM0005875 | LGUn | hypothetical protein CICLE_v1 | not DE   | not DE  | not DE   | not DE  |
| EVM0024140 | LGUn | hypothetical protein CICLE_v1 | not DE   | not DE  | not DE   | not DE  |
| EVM0013842 | LGUn | hypothetical protein CICLE_v1 | not DE   | not DE  | not DE   | not DE  |
| EVM0019910 | LGUn | hypothetical protein CICLE_v1 | not DE   | not DE  | not DE   | not DE  |
| EVM0007486 | LGUn | hypothetical protein CICLE_v1 | not DE   | not DE  | not DE   | not DE  |
| EVM0001152 | LGUn | hypothetical protein CICLE_v1 | not DE   | not DE  | not DE   | not DE  |
| EVM0003146 | LGUn | hypothetical protein CICLE_v1 | not DE   | not DE  | not DE   | not DE  |
| EVM0004293 | LGUn | hypothetical protein CICLE_v1 | not DE   | not DE  | not DE   | not DE  |
| EVM0009527 | LGUn | hypothetical protein CICLE_v1 | not DE   | not DE  | not DE   | not DE  |
| EVM0012687 | LGUn | hypothetical protein CICLE_v1 | not DE   | not DE  | not DE   | not DE  |
| EVM0023924 | LGUn | hypothetical protein CICLE_v1 | not DE   | not DE  | not DE   | not DE  |
| EVM0008945 | LGUn | hypothetical protein CICLE_v1 | not DE   | not DE  | not DE   | not DE  |
| EVM0012035 | LGUn | hypothetical protein CICLE_v1 | not DE   | not DE  | not DE   | not DE  |
| EVM0024610 | LGUn | hypothetical protein CICLE_v1 | not DE   | not DE  | not DE   | not DE  |
| EVM0019718 | LGUn | hypothetical protein CICLE_v1 | not DE   | not DE  | not DE   | not DE  |
| EVM0020000 | LGUn | hypothetical protein CICLE_v1 | not DE   | not DE  | not DE   | not DE  |
| EVM0007053 | LGUn | hypothetical protein CICLE_v1 | not DE   | not DE  | not DE   | not DE  |
| EVM0011095 | LGUn | hypothetical protein CICLE_v1 | not DE   | not DE  | not DE   | not DE  |
| EVM0017144 | LGUn | hypothetical protein CICLE_v1 | not DE   | not DE  | not DE   | not DE  |
| EVM0001701 | LGUn | hypothetical protein CICLE_v1 | not DE   | not DE  | not DE   | not DE  |
| EVM0012848 | LGUn | hypothetical protein CICLE_v1 | not DE   | not DE  | not DE   | not DE  |
| EVM0018263 | LGUn | hypothetical protein CICLE_v1 | not DE   | not DE  | not DE   | not DE  |
| EVM0022831 | LGUn | hypothetical protein CICLE_v1 | not DE   | not DE  | not DE   | not DE  |
| EVM0009998 | LGUn | hypothetical protein CICLE_v1 | not DE   | not DE  | not DE   | not DE  |
| EVM0008228 | LGUn | hypothetical protein CICLE_v1 | 2.433735 | 0.00794 | not DE   | not DE  |
| EVM0000537 | LGUn | hypothetical protein CICLE_v1 | not DE   | not DE  | not DE   | not DE  |
| EVM0006507 | LGUn | hypothetical protein CICLE_v1 | not DE   | not DE  | not DE   | not DE  |
| EVM0006925 | LGUn | hypothetical protein CICLE_v1 | not DE   | not DE  | not DE   | not DE  |
| EVM0017240 | LGUn | hypothetical protein CICLE_v1 | not DE   | not DE  | not DE   | not DE  |
| EVM0009595 | LGUn | hypothetical protein CICLE_v1 | not DE   | not DE  | not DE   | not DE  |
| EVM0011413 | LGUn | hypothetical protein CICLE_v1 | not DE   | not DE  | not DE   | not DE  |
| EVM0014012 | LGUn | hypothetical protein CICLE_v1 | not DE   | not DE  | not DE   | not DE  |
| EVM0016764 | LGUn | hypothetical protein CICLE_v1 | not DE   | not DE  | not DE   | not DE  |
| EVM0008552 | LGUn | hypothetical protein CICLE_v1 | not DE   | not DE  | not DE   | not DE  |
| EVM0005806 | LGUn | hypothetical protein CICLE_v1 | not DE   | not DE  | not DE   | not DE  |
| EVM0022456 | LGUn | hypothetical protein CICLE_v1 | not DE   | not DE  | 2.44449  | 0.00503 |
| EVM0001986 | LGUn | hypothetical protein CICLE_v1 | not DE   | not DE  | not DE   | not DE  |
| EVM0019883 | LGUn | hypothetical protein CICLE_v1 | not DE   | not DE  | not DE   | not DE  |
| EVM0006254 | LGUn | hypothetical protein CICLE_v1 | not DE   | not DE  | not DE   | not DE  |
| EVM0015585 | LGUn | hypothetical protein CICLE_v1 | not DE   | not DE  | not DE   | not DE  |
| EVM0014586 | LGUn | hypothetical protein CICLE_v1 | not DE   | not DE  | not DE   | not DE  |
| EVM0007576 | LGUn | hypothetical protein CICLE_v1 | not DE   | not DE  | not DE   | not DE  |
| EVM0023816 | LGUn | hypothetical protein CICLE_v1 | not DE   | not DE  | not DE   | not DE  |









|            |      |                               |          |          |          |         |
|------------|------|-------------------------------|----------|----------|----------|---------|
| EVM0011073 | LGUn | hypothetical protein CICLE_v1 | not DE   | not DE   | not DE   | not DE  |
| EVM0017470 | LGUn | hypothetical protein CICLE_v1 | not DE   | not DE   | not DE   | not DE  |
| EVM0011783 | LGUn | hypothetical protein CICLE_v1 | not DE   | not DE   | not DE   | not DE  |
| EVM0023253 | LGUn | hypothetical protein CICLE_v1 | not DE   | not DE   | not DE   | not DE  |
| EVM0002244 | LGUn | hypothetical protein CICLE_v1 | not DE   | not DE   | not DE   | not DE  |
| EVM0016641 | LGUn | hypothetical protein CICLE_v1 | not DE   | not DE   | not DE   | not DE  |
| EVM0007477 | LGUn | hypothetical protein CICLE_v1 | not DE   | not DE   | not DE   | not DE  |
| EVM0023744 | LGUn | hypothetical protein CICLE_v1 | not DE   | not DE   | not DE   | not DE  |
| EVM0018878 | LGUn | hypothetical protein CICLE_v1 | not DE   | not DE   | -1.84697 | 0.03473 |
| EVM0003728 | LGUn | hypothetical protein CICLE_v1 | not DE   | not DE   | not DE   | not DE  |
| EVM0002431 | LGUn | hypothetical protein CICLE_v1 | not DE   | not DE   | not DE   | not DE  |
| EVM0018595 | LGUn | hypothetical protein CICLE_v1 | not DE   | not DE   | not DE   | not DE  |
| EVM0009560 | LGUn | hypothetical protein CICLE_v1 | not DE   | not DE   | not DE   | not DE  |
| EVM0011266 | LGUn | hypothetical protein CICLE_v1 | not DE   | not DE   | not DE   | not DE  |
| EVM0004727 | LGUn | hypothetical protein CICLE_v1 | not DE   | not DE   | not DE   | not DE  |
| EVM0013467 | LGUn | hypothetical protein CICLE_v1 | not DE   | not DE   | not DE   | not DE  |
| EVM0022569 | LGUn | hypothetical protein CICLE_v1 | not DE   | not DE   | not DE   | not DE  |
| EVM0019599 | LGUn | hypothetical protein CICLE_v1 | not DE   | not DE   | not DE   | not DE  |
| EVM0002325 | LGUn | hypothetical protein CICLE_v1 | not DE   | not DE   | not DE   | not DE  |
| EVM0012240 | LGUn | hypothetical protein CICLE_v1 | not DE   | not DE   | not DE   | not DE  |
| EVM0023280 | LGUn | hypothetical protein CICLE_v1 | not DE   | not DE   | not DE   | not DE  |
| EVM0010229 | LGUn | hypothetical protein CICLE_v1 | 5.63771  | 0.000206 | not DE   | not DE  |
| EVM0003264 | LGUn | hypothetical protein CICLE_v1 | not DE   | not DE   | not DE   | not DE  |
| EVM0010515 | LGUn | hypothetical protein CICLE_v1 | not DE   | not DE   | not DE   | not DE  |
| EVM0007159 | LGUn | hypothetical protein CICLE_v1 | not DE   | not DE   | not DE   | not DE  |
| EVM0007808 | LGUn | hypothetical protein CICLE_v1 | not DE   | not DE   | -1.42493 | 0.00123 |
| EVM0005908 | LGUn | hypothetical protein CICLE_v1 | not DE   | not DE   | not DE   | not DE  |
| EVM0015327 | LGUn | hypothetical protein CICLE_v1 | not DE   | not DE   | not DE   | not DE  |
| EVM0020759 | LGUn | hypothetical protein CICLE_v1 | not DE   | not DE   | not DE   | not DE  |
| EVM0023602 | LGUn | hypothetical protein CICLE_v1 | not DE   | not DE   | not DE   | not DE  |
| EVM0005232 | LGUn | hypothetical protein CICLE_v1 | not DE   | not DE   | not DE   | not DE  |
| EVM0004298 | LGUn | hypothetical protein CICLE_v1 | not DE   | not DE   | not DE   | not DE  |
| EVM0003976 | LGUn | hypothetical protein CICLE_v1 | not DE   | not DE   | not DE   | not DE  |
| EVM0022271 | LGUn | hypothetical protein CICLE_v1 | not DE   | not DE   | not DE   | not DE  |
| EVM0020920 | LGUn | hypothetical protein CICLE_v1 | not DE   | not DE   | not DE   | not DE  |
| EVM0002609 | LGUn | hypothetical protein CICLE_v1 | not DE   | not DE   | not DE   | not DE  |
| EVM0001886 | LGUn | hypothetical protein CICLE_v1 | 2.879183 | 0.002649 | not DE   | not DE  |
| EVM0017485 | LGUn | hypothetical protein CICLE_v1 | not DE   | not DE   | not DE   | not DE  |
| EVM0024639 | LGUn | hypothetical protein CICLE_v1 | not DE   | not DE   | not DE   | not DE  |
| EVM0016165 | LGUn | hypothetical protein CICLE_v1 | not DE   | not DE   | not DE   | not DE  |
| EVM0011400 | LGUn | hypothetical protein CICLE_v1 | not DE   | not DE   | not DE   | not DE  |
| EVM0004033 | LGUn | hypothetical protein CICLE_v1 | not DE   | not DE   | not DE   | not DE  |
| EVM0014856 | LGUn | hypothetical protein CICLE_v1 | -2.5381  | 0.034545 | not DE   | not DE  |
| EVM0021275 | LGUn | hypothetical protein CICLE_v1 | not DE   | not DE   | not DE   | not DE  |
| EVM0013810 | LGUn | hypothetical protein CICLE_v1 | not DE   | not DE   | not DE   | not DE  |
| EVM0014280 | LGUn | hypothetical protein CICLE_v1 | not DE   | not DE   | not DE   | not DE  |
| EVM0014767 | LGUn | hypothetical protein CICLE_v1 | not DE   | not DE   | not DE   | not DE  |
| EVM0010171 | LGUn | hypothetical protein CICLE_v1 | not DE   | not DE   | not DE   | not DE  |
| EVM0003799 | LGUn | hypothetical protein CICLE_v1 | not DE   | not DE   | not DE   | not DE  |
| EVM0002596 | LGUn | hypothetical protein CICLE_v1 | not DE   | not DE   | not DE   | not DE  |
| EVM0021115 | LGUn | hypothetical protein CICLE_v1 | not DE   | not DE   | not DE   | not DE  |
| EVM0007793 | LGUn | hypothetical protein CICLE_v1 | not DE   | not DE   | not DE   | not DE  |
| EVM0007416 | LGUn | hypothetical protein CICLE_v1 | not DE   | not DE   | not DE   | not DE  |
| EVM0023512 | LGUn | hypothetical protein CICLE_v1 | not DE   | not DE   | not DE   | not DE  |

|            |      |                               |          |          |        |        |
|------------|------|-------------------------------|----------|----------|--------|--------|
| EVM0009210 | LGUn | hypothetical protein CICLE_v1 | not DE   | not DE   | not DE | not DE |
| EVM0013212 | LGUn | hypothetical protein CICLE_v1 | not DE   | not DE   | not DE | not DE |
| EVM0003038 | LGUn | hypothetical protein CICLE_v1 | not DE   | not DE   | not DE | not DE |
| EVM0022741 | LGUn | hypothetical protein CICLE_v1 | not DE   | not DE   | not DE | not DE |
| EVM0006374 | LGUn | hypothetical protein CICLE_v1 | not DE   | not DE   | not DE | not DE |
| EVM0000346 | LGUn | hypothetical protein CICLE_v1 | not DE   | not DE   | not DE | not DE |
| EVM0018601 | LGUn | hypothetical protein CICLE_v1 | not DE   | not DE   | not DE | not DE |
| EVM0009402 | LGUn | hypothetical protein CICLE_v1 | not DE   | not DE   | not DE | not DE |
| EVM0022845 | LGUn | hypothetical protein CICLE_v1 | not DE   | not DE   | not DE | not DE |
| EVM0013892 | LGUn | hypothetical protein CICLE_v1 | not DE   | not DE   | not DE | not DE |
| EVM0017008 | LGUn | hypothetical protein CICLE_v1 | not DE   | not DE   | not DE | not DE |
| EVM0010202 | LGUn | hypothetical protein CICLE_v1 | not DE   | not DE   | not DE | not DE |
| EVM0011203 | LGUn | hypothetical protein CICLE_v1 | not DE   | not DE   | not DE | not DE |
| EVM0003630 | LGUn | hypothetical protein CICLE_v1 | not DE   | not DE   | not DE | not DE |
| EVM0013893 | LGUn | hypothetical protein CISIN_1g | not DE   | not DE   | not DE | not DE |
| EVM0013323 | LGUn | hypothetical protein CISIN_1g | not DE   | not DE   | not DE | not DE |
| EVM0006652 | LGUn | hypothetical protein CISIN_1g | not DE   | not DE   | not DE | not DE |
| EVM0016873 | LGUn | hypothetical protein CISIN_1g | not DE   | not DE   | not DE | not DE |
| EVM0007151 | LGUn | hypothetical protein CISIN_1g | not DE   | not DE   | not DE | not DE |
| EVM0011181 | LGUn | hypothetical protein CISIN_1g | not DE   | not DE   | not DE | not DE |
| EVM0004937 | LGUn | hypothetical protein CISIN_1g | not DE   | not DE   | not DE | not DE |
| EVM0008558 | LGUn | hypothetical protein CISIN_1g | not DE   | not DE   | not DE | not DE |
| EVM0005804 | LGUn | hypothetical protein CISIN_1g | not DE   | not DE   | not DE | not DE |
| EVM0016395 | LGUn | hypothetical protein CISIN_1g | not DE   | not DE   | not DE | not DE |
| EVM0006774 | LGUn | hypothetical protein CISIN_1g | 1.239428 | 0.018727 | not DE | not DE |
| EVM0020213 | LGUn | hypothetical protein CISIN_1g | not DE   | not DE   | not DE | not DE |
| EVM0023964 | LGUn | hypothetical protein CISIN_1g | not DE   | not DE   | not DE | not DE |
| EVM0004370 | LGUn | hypothetical protein CISIN_1g | not DE   | not DE   | not DE | not DE |
| EVM0020506 | LGUn | hypothetical protein CISIN_1g | not DE   | not DE   | not DE | not DE |
| EVM0011963 | LGUn | hypothetical protein CISIN_1g | not DE   | not DE   | not DE | not DE |
| EVM0005528 | LGUn | hypothetical protein CISIN_1g | not DE   | not DE   | not DE | not DE |
| EVM0013230 | LGUn | hypothetical protein CISIN_1g | not DE   | not DE   | not DE | not DE |
| EVM0018238 | LGUn | hypothetical protein CISIN_1g | not DE   | not DE   | not DE | not DE |
| EVM0012121 | LGUn | hypothetical protein CISIN_1g | not DE   | not DE   | not DE | not DE |
| EVM0000676 | LGUn | hypothetical protein CISIN_1g | not DE   | not DE   | not DE | not DE |
| EVM0004864 | LGUn | hypothetical protein CISIN_1g | not DE   | not DE   | not DE | not DE |
| EVM0002505 | LGUn | hypothetical protein CISIN_1g | not DE   | not DE   | not DE | not DE |
| EVM0009136 | LGUn | hypothetical protein CISIN_1g | not DE   | not DE   | not DE | not DE |
| EVM0014132 | LGUn | hypothetical protein CISIN_1g | not DE   | not DE   | not DE | not DE |
| EVM0001040 | LGUn | hypothetical protein CISIN_1g | not DE   | not DE   | not DE | not DE |
| EVM0019257 | LGUn | hypothetical protein CISIN_1g | not DE   | not DE   | not DE | not DE |
| EVM0013009 | LGUn | hypothetical protein CISIN_1g | not DE   | not DE   | not DE | not DE |
| EVM0021218 | LGUn | hypothetical protein CISIN_1g | not DE   | not DE   | not DE | not DE |
| EVM0003810 | LGUn | hypothetical protein CISIN_1g | not DE   | not DE   | not DE | not DE |
| EVM0018823 | LGUn | hypothetical protein CISIN_1g | not DE   | not DE   | not DE | not DE |
| EVM0007549 | LGUn | hypothetical protein CISIN_1g | not DE   | not DE   | not DE | not DE |
| EVM0012934 | LGUn | hypothetical protein CISIN_1g | not DE   | not DE   | not DE | not DE |
| EVM0017250 | LGUn | hypothetical protein CISIN_1g | not DE   | not DE   | not DE | not DE |
| EVM0020242 | LGUn | hypothetical protein CISIN_1g | not DE   | not DE   | not DE | not DE |
| EVM0019275 | LGUn | hypothetical protein CISIN_1g | not DE   | not DE   | not DE | not DE |
| EVM0015860 | LGUn | hypothetical protein CISIN_1g | not DE   | not DE   | not DE | not DE |
| EVM0012305 | LGUn | hypothetical protein CISIN_1g | -1.9527  | 0.027451 | not DE | not DE |
| EVM0009655 | LGUn | hypothetical protein CISIN_1g | not DE   | not DE   | not DE | not DE |
| EVM0011601 | LGUn | hypothetical protein CISIN_1g | not DE   | not DE   | not DE | not DE |





|            |      |                               |          |          |          |         |
|------------|------|-------------------------------|----------|----------|----------|---------|
| EVM0016853 | LGUn | hypothetical protein CISIN_1g | not DE   | not DE   | not DE   | not DE  |
| EVM0000556 | LGUn | hypothetical protein CISIN_1g | not DE   | not DE   | not DE   | not DE  |
| EVM0020495 | LGUn | hypothetical protein CISIN_1g | not DE   | not DE   | not DE   | not DE  |
| EVM0015200 | LGUn | hypothetical protein CISIN_1g | not DE   | not DE   | not DE   | not DE  |
| EVM0023668 | LGUn | hypothetical protein CISIN_1g | not DE   | not DE   | not DE   | not DE  |
| EVM0007541 | LGUn | hypothetical protein CISIN_1g | not DE   | not DE   | not DE   | not DE  |
| EVM0017428 | LGUn | hypothetical protein CISIN_1g | not DE   | not DE   | not DE   | not DE  |
| EVM0002743 | LGUn | hypothetical protein CISIN_1g | not DE   | not DE   | not DE   | not DE  |
| EVM0002884 | LGUn | hypothetical protein CISIN_1g | not DE   | not DE   | not DE   | not DE  |
| EVM0004518 | LGUn | hypothetical protein CISIN_1g | not DE   | not DE   | not DE   | not DE  |
| EVM0007700 | LGUn | hypothetical protein CISIN_1g | not DE   | not DE   | not DE   | not DE  |
| EVM0011068 | LGUn | hypothetical protein CISIN_1g | not DE   | not DE   | not DE   | not DE  |
| EVM0006654 | LGUn | hypothetical protein CISIN_1g | not DE   | not DE   | not DE   | not DE  |
| EVM0001772 | LGUn | hypothetical protein CISIN_1g | not DE   | not DE   | not DE   | not DE  |
| EVM0022379 | LGUn | hypothetical protein CISIN_1g | not DE   | not DE   | not DE   | not DE  |
| EVM0014704 | LGUn | hypothetical protein EUGRSUZ_ | not DE   | not DE   | not DE   | not DE  |
| EVM0001309 | LGUn | hypothetical protein EUGRSUZ_ | not DE   | not DE   | not DE   | not DE  |
| EVM0024502 | LGUn | hypothetical protein EUGRSUZ_ | not DE   | not DE   | not DE   | not DE  |
| EVM0016571 | LGUn | hypothetical protein F383_092 | not DE   | not DE   | not DE   | not DE  |
| EVM0013229 | LGUn | hypothetical protein F383_195 | -5.10344 | 0.001612 | not DE   | not DE  |
| EVM0007867 | LGUn | hypothetical protein F383_344 | not DE   | not DE   | not DE   | not DE  |
| EVM0007607 | LGUn | hypothetical protein JCGZ_003 | not DE   | not DE   | not DE   | not DE  |
| EVM0003891 | LGUn | hypothetical protein JCGZ_017 | not DE   | not DE   | not DE   | not DE  |
| EVM0001526 | LGUn | hypothetical protein JCGZ_018 | not DE   | not DE   | not DE   | not DE  |
| EVM0000357 | LGUn | hypothetical protein JCGZ_056 | not DE   | not DE   | not DE   | not DE  |
| EVM0004186 | LGUn | hypothetical protein JCGZ_058 | not DE   | not DE   | not DE   | not DE  |
| EVM0005493 | LGUn | hypothetical protein JCGZ_058 | not DE   | not DE   | not DE   | not DE  |
| EVM0004652 | LGUn | hypothetical protein JCGZ_058 | not DE   | not DE   | not DE   | not DE  |
| EVM0022824 | LGUn | hypothetical protein JCGZ_064 | not DE   | not DE   | not DE   | not DE  |
| EVM0010880 | LGUn | hypothetical protein JCGZ_070 | not DE   | not DE   | not DE   | not DE  |
| EVM0015926 | LGUn | hypothetical protein JCGZ_070 | not DE   | not DE   | not DE   | not DE  |
| EVM0013814 | LGUn | hypothetical protein JCGZ_070 | not DE   | not DE   | 2.348524 | 0.02865 |
| EVM0011295 | LGUn | hypothetical protein JCGZ_102 | not DE   | not DE   | not DE   | not DE  |
| EVM0016228 | LGUn | hypothetical protein JCGZ_102 | not DE   | not DE   | not DE   | not DE  |
| EVM0021728 | LGUn | hypothetical protein JCGZ_102 | not DE   | not DE   | not DE   | not DE  |
| EVM0019193 | LGUn | hypothetical protein JCGZ_105 | not DE   | not DE   | not DE   | not DE  |
| EVM0024529 | LGUn | hypothetical protein JCGZ_120 | not DE   | not DE   | not DE   | not DE  |
| EVM0016160 | LGUn | hypothetical protein JCGZ_122 | not DE   | not DE   | not DE   | not DE  |
| EVM0000811 | LGUn | hypothetical protein JCGZ_131 | not DE   | not DE   | not DE   | not DE  |
| EVM0006209 | LGUn | hypothetical protein JCGZ_146 | not DE   | not DE   | not DE   | not DE  |
| EVM0022793 | LGUn | hypothetical protein JCGZ_154 | not DE   | not DE   | not DE   | not DE  |
| EVM0004205 | LGUn | hypothetical protein JCGZ_157 | not DE   | not DE   | not DE   | not DE  |
| EVM0004366 | LGUn | hypothetical protein JCGZ_157 | not DE   | not DE   | not DE   | not DE  |
| EVM0001604 | LGUn | hypothetical protein JCGZ_158 | not DE   | not DE   | not DE   | not DE  |
| EVM0004200 | LGUn | hypothetical protein JCGZ_160 | not DE   | not DE   | not DE   | not DE  |
| EVM0000238 | LGUn | hypothetical protein JCGZ_165 | not DE   | not DE   | not DE   | not DE  |
| EVM0001335 | LGUn | hypothetical protein JCGZ_165 | not DE   | not DE   | not DE   | not DE  |
| EVM0023215 | LGUn | hypothetical protein JCGZ_166 | not DE   | not DE   | not DE   | not DE  |
| EVM0002167 | LGUn | hypothetical protein JCGZ_186 | not DE   | not DE   | not DE   | not DE  |
| EVM0023527 | LGUn | hypothetical protein JCGZ_187 | not DE   | not DE   | not DE   | not DE  |
| EVM0006985 | LGUn | hypothetical protein JCGZ_201 | not DE   | not DE   | not DE   | not DE  |
| EVM0018727 | LGUn | hypothetical protein JCGZ_215 | not DE   | not DE   | not DE   | not DE  |
| EVM0002457 | LGUn | hypothetical protein JCGZ_233 | -7.99167 | 0.000184 | not DE   | not DE  |
| EVM0020362 | LGUn | hypothetical protein JCGZ_238 | not DE   | not DE   | not DE   | not DE  |

|            |      |                               |        |        |        |        |
|------------|------|-------------------------------|--------|--------|--------|--------|
| EVM0006141 | LGUn | hypothetical protein JCGZ_240 | not DE | not DE | not DE | not DE |
| EVM0010201 | LGUn | hypothetical protein JCGZ_245 | not DE | not DE | not DE | not DE |
| EVM0016869 | LGUn | hypothetical protein JCGZ_247 | not DE | not DE | not DE | not DE |
| EVM0019189 | LGUn | hypothetical protein JCGZ_256 | not DE | not DE | not DE | not DE |
| EVM0018753 | LGUn | hypothetical protein JCGZ_260 | not DE | not DE | not DE | not DE |
| EVM0001589 | LGUn | hypothetical protein JCGZ_268 | not DE | not DE | not DE | not DE |
| EVM0023433 | LGUn | hypothetical protein L484_003 | not DE | not DE | not DE | not DE |
| EVM0003343 | LGUn | hypothetical protein L484_006 | not DE | not DE | not DE | not DE |
| EVM0016310 | LGUn | hypothetical protein L484_007 | not DE | not DE | not DE | not DE |
| EVM0000846 | LGUn | hypothetical protein L484_010 | not DE | not DE | not DE | not DE |
| EVM0003133 | LGUn | hypothetical protein L484_013 | not DE | not DE | not DE | not DE |
| EVM0017993 | LGUn | hypothetical protein L484_015 | not DE | not DE | not DE | not DE |
| EVM0013767 | LGUn | hypothetical protein L484_022 | not DE | not DE | not DE | not DE |
| EVM0004517 | LGUn | hypothetical protein MIMGU_mg | not DE | not DE | not DE | not DE |
| EVM0011090 | LGUn | hypothetical protein MIMGU_mg | not DE | not DE | not DE | not DE |
| EVM0007260 | LGUn | hypothetical protein MIMGU_mg | not DE | not DE | not DE | not DE |
| EVM0001679 | LGUn | hypothetical protein PHAVU_00 | not DE | not DE | not DE | not DE |
| EVM0014167 | LGUn | hypothetical protein PHAVU_00 | not DE | not DE | not DE | not DE |
| EVM0011587 | LGUn | hypothetical protein PHAVU_00 | not DE | not DE | not DE | not DE |
| EVM0005665 | LGUn | hypothetical protein PHAVU_01 | not DE | not DE | not DE | not DE |
| EVM0000369 | LGUn | hypothetical protein PHAVU_01 | not DE | not DE | not DE | not DE |
| EVM0000602 | LGUn | hypothetical protein PHAVU_01 | not DE | not DE | not DE | not DE |
| EVM0003268 | LGUn | hypothetical protein PHAVU_01 | not DE | not DE | not DE | not DE |
| EVM0005184 | LGUn | hypothetical protein PHAVU_01 | not DE | not DE | not DE | not DE |
| EVM0012154 | LGUn | hypothetical protein PHAVU_01 | not DE | not DE | not DE | not DE |
| EVM0013429 | LGUn | hypothetical protein PHAVU_01 | not DE | not DE | not DE | not DE |
| EVM0016613 | LGUn | hypothetical protein PHAVU_01 | not DE | not DE | not DE | not DE |
| EVM0016702 | LGUn | hypothetical protein PHAVU_01 | not DE | not DE | not DE | not DE |
| EVM0023615 | LGUn | hypothetical protein PHAVU_01 | not DE | not DE | not DE | not DE |
| EVM0021848 | LGUn | hypothetical protein POPTR_00 | not DE | not DE | not DE | not DE |
| EVM0013518 | LGUn | hypothetical protein POPTR_00 | not DE | not DE | not DE | not DE |
| EVM0023086 | LGUn | hypothetical protein POPTR_00 | not DE | not DE | not DE | not DE |
| EVM0000979 | LGUn | hypothetical protein POPTR_00 | not DE | not DE | not DE | not DE |
| EVM0016777 | LGUn | hypothetical protein POPTR_00 | not DE | not DE | not DE | not DE |
| EVM0000266 | LGUn | hypothetical protein POPTR_00 | not DE | not DE | not DE | not DE |
| EVM0001700 | LGUn | hypothetical protein POPTR_00 | not DE | not DE | not DE | not DE |
| EVM0019017 | LGUn | hypothetical protein POPTR_00 | not DE | not DE | not DE | not DE |
| EVM0017396 | LGUn | hypothetical protein POPTR_00 | not DE | not DE | not DE | not DE |
| EVM0007582 | LGUn | hypothetical protein POPTR_00 | not DE | not DE | not DE | not DE |
| EVM0024663 | LGUn | hypothetical protein POPTR_00 | not DE | not DE | not DE | not DE |
| EVM0006274 | LGUn | hypothetical protein POPTR_00 | not DE | not DE | not DE | not DE |
| EVM0001624 | LGUn | hypothetical protein POPTR_00 | not DE | not DE | not DE | not DE |
| EVM0006308 | LGUn | hypothetical protein POPTR_00 | not DE | not DE | not DE | not DE |
| EVM0005930 | LGUn | hypothetical protein POPTR_00 | not DE | not DE | not DE | not DE |
| EVM0001119 | LGUn | hypothetical protein POPTR_00 | not DE | not DE | not DE | not DE |
| EVM0009668 | LGUn | hypothetical protein POPTR_00 | not DE | not DE | not DE | not DE |
| EVM0011446 | LGUn | hypothetical protein POPTR_00 | not DE | not DE | not DE | not DE |
| EVM0015271 | LGUn | hypothetical protein POPTR_00 | not DE | not DE | not DE | not DE |
| EVM0014578 | LGUn | hypothetical protein POPTR_00 | not DE | not DE | not DE | not DE |
| EVM0005428 | LGUn | hypothetical protein POPTR_00 | not DE | not DE | not DE | not DE |
| EVM0002286 | LGUn | hypothetical protein POPTR_00 | not DE | not DE | not DE | not DE |
| EVM0018575 | LGUn | hypothetical protein POPTR_00 | not DE | not DE | not DE | not DE |
| EVM0019842 | LGUn | hypothetical protein POPTR_00 | not DE | not DE | not DE | not DE |
| EVM0000211 | LGUn | hypothetical protein POPTR_00 | not DE | not DE | not DE | not DE |



|            |      |                               |          |          |          |         |
|------------|------|-------------------------------|----------|----------|----------|---------|
| EVM0022071 | LGUn | hypothetical protein POPTR_00 | not DE   | not DE   | not DE   | not DE  |
| EVM0008844 | LGUn | hypothetical protein POPTR_00 | not DE   | not DE   | not DE   | not DE  |
| EVM0006016 | LGUn | hypothetical protein POPTR_00 | not DE   | not DE   | not DE   | not DE  |
| EVM0007190 | LGUn | hypothetical protein POPTR_00 | not DE   | not DE   | not DE   | not DE  |
| EVM0023957 | LGUn | hypothetical protein POPTR_00 | not DE   | not DE   | not DE   | not DE  |
| EVM0000262 | LGUn | hypothetical protein POPTR_00 | not DE   | not DE   | not DE   | not DE  |
| EVM0012205 | LGUn | hypothetical protein POPTR_00 | not DE   | not DE   | not DE   | not DE  |
| EVM0001028 | LGUn | hypothetical protein POPTR_00 | not DE   | not DE   | not DE   | not DE  |
| EVM0019985 | LGUn | hypothetical protein PRUPE_pp | not DE   | not DE   | not DE   | not DE  |
| EVM0006514 | LGUn | hypothetical protein PRUPE_pp | not DE   | not DE   | not DE   | not DE  |
| EVM0014852 | LGUn | hypothetical protein PRUPE_pp | not DE   | not DE   | not DE   | not DE  |
| EVM0002050 | LGUn | hypothetical protein PRUPE_pp | not DE   | not DE   | not DE   | not DE  |
| EVM0003142 | LGUn | hypothetical protein PRUPE_pp | not DE   | not DE   | not DE   | not DE  |
| EVM0008994 | LGUn | hypothetical protein PRUPE_pp | not DE   | not DE   | not DE   | not DE  |
| EVM0010510 | LGUn | hypothetical protein PRUPE_pp | not DE   | not DE   | not DE   | not DE  |
| EVM0002140 | LGUn | hypothetical protein PRUPE_pp | not DE   | not DE   | not DE   | not DE  |
| EVM0002883 | LGUn | hypothetical protein PRUPE_pp | not DE   | not DE   | not DE   | not DE  |
| EVM0006776 | LGUn | hypothetical protein PRUPE_pp | not DE   | not DE   | not DE   | not DE  |
| EVM0009367 | LGUn | hypothetical protein PRUPE_pp | not DE   | not DE   | not DE   | not DE  |
| EVM0000816 | LGUn | hypothetical protein PRUPE_pp | 1.764937 | 0.024733 | 3.431581 | #####   |
| EVM0003714 | LGUn | hypothetical protein PRUPE_pp | not DE   | not DE   | not DE   | not DE  |
| EVM0019616 | LGUn | hypothetical protein PRUPE_pp | not DE   | not DE   | not DE   | not DE  |
| EVM0002438 | LGUn | hypothetical protein PRUPE_pp | not DE   | not DE   | not DE   | not DE  |
| EVM0003127 | LGUn | hypothetical protein PRUPE_pp | not DE   | not DE   | not DE   | not DE  |
| EVM0015045 | LGUn | hypothetical protein PRUPE_pp | not DE   | not DE   | not DE   | not DE  |
| EVM0015195 | LGUn | hypothetical protein PRUPE_pp | not DE   | not DE   | not DE   | not DE  |
| EVM0011974 | LGUn | hypothetical protein PRUPE_pp | not DE   | not DE   | not DE   | not DE  |
| EVM0022827 | LGUn | hypothetical protein PRUPE_pp | not DE   | not DE   | not DE   | not DE  |
| EVM0019803 | LGUn | hypothetical protein PRUPE_pp | not DE   | not DE   | not DE   | not DE  |
| EVM0022082 | LGUn | hypothetical protein PRUPE_pp | not DE   | not DE   | not DE   | not DE  |
| EVM0021524 | LGUn | hypothetical protein PhapfoPp | not DE   | not DE   | not DE   | not DE  |
| EVM0007944 | LGUn | hypothetical protein SELMODRA | not DE   | not DE   | -1.61809 | 0.00168 |
| EVM0008035 | LGUn | hypothetical protein TCM_0013 | not DE   | not DE   | not DE   | not DE  |
| EVM0011881 | LGUn | hypothetical protein VITISV_0 | not DE   | not DE   | not DE   | not DE  |
| EVM0008119 | LGUn | hypothetical protein VITISV_0 | not DE   | not DE   | not DE   | not DE  |
| EVM0003751 | LGUn | hypothetical protein VITISV_0 | not DE   | not DE   | not DE   | not DE  |
| EVM0004339 | LGUn | hypothetical protein VITISV_0 | not DE   | not DE   | not DE   | not DE  |
| EVM0022472 | LGUn | hypothetical protein VITISV_0 | not DE   | not DE   | not DE   | not DE  |
| EVM0018759 | LGUn | hypothetical protein VITISV_0 | not DE   | not DE   | not DE   | not DE  |
| EVM0016716 | LGUn | hypothetical protein VITISV_0 | not DE   | not DE   | not DE   | not DE  |
| EVM0011089 | LGUn | hypothetical protein VITISV_0 | not DE   | not DE   | not DE   | not DE  |
| EVM0001339 | LGUn | hypothetical protein VITISV_0 | not DE   | not DE   | not DE   | not DE  |
| EVM0002496 | LGUn | hypothetical protein VITISV_0 | not DE   | not DE   | not DE   | not DE  |
| EVM0015204 | LGUn | linalool synthase             | not DE   | not DE   | not DE   | not DE  |
| EVM0015141 | LGUn | lipxygenase                   | not DE   | not DE   | not DE   | not DE  |
| EVM0024359 | LGUn | lipxygenase                   | not DE   | not DE   | not DE   | not DE  |
| EVM0013005 | LGUn | maternal effect embryo arrest | not DE   | not DE   | not DE   | not DE  |
| EVM0010562 | LGUn | neutral/alkaline invertase    | not DE   | not DE   | not DE   | not DE  |
| EVM0017517 | LGUn | pentatricopeptide repeat-cont | not DE   | not DE   | not DE   | not DE  |
| EVM0005006 | LGUn | protein phosphatase 2c, putat | not DE   | not DE   | not DE   | not DE  |
| EVM0006800 | LGUn | protein with unknown function | not DE   | not DE   | not DE   | not DE  |
| EVM0013703 | LGUn | putative auxin influx carrier | not DE   | not DE   | not DE   | not DE  |
| EVM0007939 | LGUn | putative cadmium-transporting | not DE   | not DE   | not DE   | not DE  |
| EVM0008878 | LGUn | putative chloroplast starch s | not DE   | not DE   | not DE   | not DE  |

|            |      |                                       |         |          |        |        |
|------------|------|---------------------------------------|---------|----------|--------|--------|
| EVM0023499 | LGUn | ribosomal protein S3, partial         | -1.7599 | 2.85E-05 | not DE | not DE |
| EVM0010067 | LGUn | ring finger protein, putative         | not DE  | not DE   | not DE | not DE |
| EVM0014230 | LGUn | s-adenosylmethionine synthetase       | not DE  | not DE   | not DE | not DE |
| EVM0023861 | LGUn | solaneyl diphosphate synthase         | not DE  | not DE   | not DE | not DE |
| EVM0000974 | LGUn | terminal flower 1                     | not DE  | not DE   | not DE | not DE |
| EVM0002854 | LGUn | tetratricopeptide domain-containing   | not DE  | not DE   | not DE | not DE |
| EVM0004703 | LGUn | thaumatin-like protein                | not DE  | not DE   | not DE | not DE |
| EVM0006497 | LGUn | thiazole biosynthetic enzyme          | not DE  | not DE   | not DE | not DE |
| EVM0021712 | LGUn | thioredoxin family protein            | not DE  | not DE   | not DE | not DE |
| EVM0013328 | LGUn | tonoplast intrinsic protein, putative | not DE  | not DE   | not DE | not DE |
| EVM0023151 | LGUn | tonoplast intrinsic protein, putative | not DE  | not DE   | not DE | not DE |
| EVM0023971 | LGUn | transcription factor, putative        | not DE  | not DE   | not DE | not DE |
| EVM0005949 | LGUn | triptychon and cpc, putative          | not DE  | not DE   | not DE | not DE |
| EVM0020485 | LGUn | triptychon and cpc, putative          | not DE  | not DE   | not DE | not DE |
| EVM0003131 | LGUn | ubiquitin 11                          | not DE  | not DE   | not DE | not DE |
| EVM0003508 | LGUn | unknown protein                       | not DE  | not DE   | not DE | not DE |
| EVM0016261 | LGUn | unknown protein                       | not DE  | not DE   | not DE | not DE |
| EVM0016401 | LGUn | unknown protein                       | not DE  | not DE   | not DE | not DE |
| EVM0017781 | LGUn | unknown protein                       | not DE  | not DE   | not DE | not DE |
| EVM0018014 | LGUn | unknown protein                       | not DE  | not DE   | not DE | not DE |
| EVM0018145 | LGUn | unknown protein                       | not DE  | not DE   | not DE | not DE |
| EVM0018441 | LGUn | unknown protein                       | not DE  | not DE   | not DE | not DE |
| EVM0018579 | LGUn | unknown protein                       | not DE  | not DE   | not DE | not DE |
| EVM0019327 | LGUn | unknown protein                       | not DE  | not DE   | not DE | not DE |
| EVM0020264 | LGUn | unknown protein                       | not DE  | not DE   | not DE | not DE |
| EVM0021853 | LGUn | unknown protein                       | not DE  | not DE   | not DE | not DE |
| EVM0022383 | LGUn | unknown protein                       | -2.773  | 0.001364 | not DE | not DE |
| EVM0000158 | LGUn | unnamed protein product               | not DE  | not DE   | not DE | not DE |
| EVM0001873 | LGUn | unnamed protein product               | not DE  | not DE   | not DE | not DE |
| EVM0002370 | LGUn | unnamed protein product               | not DE  | not DE   | not DE | not DE |
| EVM0002526 | LGUn | unnamed protein product               | not DE  | not DE   | not DE | not DE |
| EVM0002648 | LGUn | unnamed protein product               | not DE  | not DE   | not DE | not DE |
| EVM0003490 | LGUn | unnamed protein product               | not DE  | not DE   | not DE | not DE |
| EVM0005677 | LGUn | unnamed protein product               | not DE  | not DE   | not DE | not DE |
| EVM0007764 | LGUn | unnamed protein product               | not DE  | not DE   | not DE | not DE |
| EVM0008695 | LGUn | unnamed protein product               | not DE  | not DE   | not DE | not DE |
| EVM0009495 | LGUn | unnamed protein product               | not DE  | not DE   | not DE | not DE |
| EVM0010284 | LGUn | unnamed protein product               | not DE  | not DE   | not DE | not DE |
| EVM0010452 | LGUn | unnamed protein product               | not DE  | not DE   | not DE | not DE |
| EVM0011773 | LGUn | unnamed protein product               | not DE  | not DE   | not DE | not DE |
| EVM0013071 | LGUn | unnamed protein product               | not DE  | not DE   | not DE | not DE |
| EVM0014069 | LGUn | unnamed protein product               | not DE  | not DE   | not DE | not DE |
| EVM0016032 | LGUn | unnamed protein product               | not DE  | not DE   | not DE | not DE |
| EVM0017484 | LGUn | unnamed protein product               | not DE  | not DE   | not DE | not DE |
| EVM0017808 | LGUn | unnamed protein product               | not DE  | not DE   | not DE | not DE |
| EVM0018722 | LGUn | unnamed protein product               | not DE  | not DE   | not DE | not DE |
| EVM0019329 | LGUn | unnamed protein product               | not DE  | not DE   | not DE | not DE |
| EVM0020544 | LGUn | unnamed protein product               | not DE  | not DE   | not DE | not DE |
| EVM0022823 | LGUn | unnamed protein product               | not DE  | not DE   | not DE | not DE |
| EVM0022945 | LGUn | unnamed protein product               | not DE  | not DE   | not DE | not DE |
| EVM0023400 | LGUn | unnamed protein product               | not DE  | not DE   | not DE | not DE |
| EVM0024228 | LGUn | unnamed protein product               | not DE  | not DE   | not DE | not DE |
| EVM0010430 | LGUn | zeta-carotene desaturase              | not DE  | not DE   | not DE | not DE |



|          |             |          |          |          |          |          |             |
|----------|-------------|----------|----------|----------|----------|----------|-------------|
| not DE   | not DE      | not DE   | not DE   | not DE   | not DE   | not DE   | not DE      |
| not DE   | not DE      | not DE   | not DE   | not DE   | not DE   | not DE   | not DE      |
| not DE   | not DE      | not DE   | not DE   | not DE   | not DE   | 1.657176 | 0.02564411  |
| not DE   | not DE      | not DE   | not DE   | not DE   | not DE   | not DE   | not DE      |
| not DE   | not DE      | not DE   | not DE   | not DE   | not DE   | not DE   | not DE      |
| not DE   | not DE      | not DE   | not DE   | not DE   | not DE   | not DE   | not DE      |
| not DE   | not DE      | not DE   | not DE   | not DE   | not DE   | not DE   | not DE      |
| not DE   | not DE      | not DE   | not DE   | not DE   | not DE   | not DE   | not DE      |
| not DE   | not DE      | not DE   | not DE   | not DE   | not DE   | not DE   | not DE      |
| not DE   | not DE      | not DE   | not DE   | not DE   | not DE   | not DE   | not DE      |
| not DE   | not DE      | not DE   | not DE   | not DE   | not DE   | not DE   | not DE      |
| not DE   | not DE      | 3.641536 | 0.002744 | not DE   | not DE   | not DE   | not DE      |
| not DE   | not DE      | not DE   | not DE   | not DE   | not DE   | 1.087044 | 1.30E-07    |
| not DE   | not DE      | not DE   | not DE   | not DE   | not DE   | not DE   | not DE      |
| not DE   | not DE      | not DE   | not DE   | not DE   | not DE   | not DE   | not DE      |
| -1.36774 | 1.88E-09    | not DE   | not DE   | not DE   | not DE   | -1.38123 | 1.47E-06    |
| not DE   | not DE      | -1.00197 | 0.031323 | not DE   | not DE   | not DE   | not DE      |
| not DE   | not DE      | not DE   | not DE   | not DE   | not DE   | not DE   | not DE      |
| -2.00769 | 7.75E-06    | not DE   | not DE   | -1.74958 | 3.50E-13 | -2.23509 | 7.07E-07    |
| not DE   | not DE      | not DE   | not DE   | not DE   | not DE   | not DE   | not DE      |
| not DE   | not DE      | not DE   | not DE   | not DE   | not DE   | not DE   | not DE      |
| not DE   | not DE      | 1.406934 | 0.048186 | not DE   | not DE   | 1.190322 | 0.000625531 |
| not DE   | not DE      | not DE   | not DE   | not DE   | not DE   | not DE   | not DE      |
| not DE   | not DE      | not DE   | not DE   | not DE   | not DE   | not DE   | not DE      |
| not DE   | not DE      | not DE   | not DE   | not DE   | not DE   | not DE   | not DE      |
| not DE   | not DE      | not DE   | not DE   | not DE   | not DE   | not DE   | not DE      |
| not DE   | not DE      | not DE   | not DE   | not DE   | not DE   | not DE   | not DE      |
| not DE   | not DE      | not DE   | not DE   | not DE   | not DE   | not DE   | not DE      |
| not DE   | not DE      | not DE   | not DE   | not DE   | not DE   | -1.21454 | 0.009197956 |
| not DE   | not DE      | 4.446838 | 7.81E-05 | not DE   | not DE   | not DE   | not DE      |
| not DE   | not DE      | not DE   | not DE   | not DE   | not DE   | not DE   | not DE      |
| not DE   | not DE      | not DE   | not DE   | not DE   | not DE   | not DE   | not DE      |
| not DE   | not DE      | not DE   | not DE   | not DE   | not DE   | not DE   | not DE      |
| not DE   | not DE      | not DE   | not DE   | not DE   | not DE   | not DE   | not DE      |
| not DE   | not DE      | not DE   | not DE   | not DE   | not DE   | not DE   | not DE      |
| not DE   | not DE      | not DE   | not DE   | not DE   | not DE   | not DE   | not DE      |
| not DE   | not DE      | not DE   | not DE   | not DE   | not DE   | not DE   | not DE      |
| 1.210691 | 0.001974709 | not DE   | not DE   | -1.05749 | 0.014758 | 1.284929 | 0.028450947 |
| not DE   | not DE      | -1.23427 | 0.011603 | not DE   | not DE   | not DE   | not DE      |
| not DE   | not DE      | not DE   | not DE   | not DE   | not DE   | 1.142491 | 0.003163571 |
| not DE   | not DE      | not DE   | not DE   | not DE   | not DE   | not DE   | not DE      |
| not DE   | not DE      | not DE   | not DE   | not DE   | not DE   | not DE   | not DE      |
| not DE   | not DE      | not DE   | not DE   | not DE   | not DE   | not DE   | not DE      |
| not DE   | not DE      | not DE   | not DE   | not DE   | not DE   | not DE   | not DE      |
| not DE   | not DE      | not DE   | not DE   | not DE   | not DE   | not DE   | not DE      |
| not DE   | not DE      | not DE   | not DE   | not DE   | not DE   | not DE   | not DE      |
| not DE   | not DE      | not DE   | not DE   | not DE   | not DE   | not DE   | not DE      |
| not DE   | not DE      | not DE   | not DE   | not DE   | not DE   | not DE   | not DE      |
| not DE   | not DE      | not DE   | not DE   | not DE   | not DE   | not DE   | not DE      |
| not DE   | not DE      | not DE   | not DE   | not DE   | not DE   | -3.8621  | 0.01196249  |
| not DE   | not DE      | not DE   | not DE   | not DE   | not DE   | not DE   | not DE      |
| -2.16222 | 0.009638439 | not DE   | not DE   | not DE   | not DE   | -4.28096 | 1.35E-08    |
| not DE   | not DE      | not DE   | not DE   | not DE   | not DE   | not DE   | not DE      |
| 2.004942 | 5.88E-05    | not DE   | not DE   | 1.174281 | 0.04535  | 3.014464 | 9.62E-08    |
| not DE   | not DE      | not DE   | not DE   | not DE   | not DE   | not DE   | not DE      |
| not DE   | not DE      | not DE   | not DE   | not DE   | not DE   | not DE   | not DE      |
| not DE   | not DE      | 4.491684 | 5.17E-05 | not DE   | not DE   | not DE   | not DE      |
| not DE   | not DE      | not DE   | not DE   | not DE   | not DE   | 1.013862 | 0.027112177 |

|          |             |          |          |        |        |          |             |
|----------|-------------|----------|----------|--------|--------|----------|-------------|
| not DE   | not DE      | not DE   | not DE   | not DE | not DE | not DE   | not DE      |
| not DE   | not DE      | not DE   | not DE   | not DE | not DE | not DE   | not DE      |
| not DE   | not DE      | not DE   | not DE   | not DE | not DE | not DE   | not DE      |
| not DE   | not DE      | not DE   | not DE   | not DE | not DE | not DE   | not DE      |
| not DE   | not DE      | not DE   | not DE   | not DE | not DE | not DE   | not DE      |
| not DE   | not DE      | -2.6701  | 0.046392 | not DE | not DE | not DE   | not DE      |
| 2.227674 | 0.045763733 | not DE   | not DE   | not DE | not DE | 2.808647 | 0.009861612 |
| 3.489937 | 0.000937781 | not DE   | not DE   | not DE | not DE | not DE   | not DE      |
| not DE   | not DE      | not DE   | not DE   | not DE | not DE | not DE   | not DE      |
| not DE   | not DE      | not DE   | not DE   | not DE | not DE | 1.375654 | 1.91E-06    |
| not DE   | not DE      | not DE   | not DE   | not DE | not DE | not DE   | not DE      |
| not DE   | not DE      | not DE   | not DE   | not DE | not DE | not DE   | not DE      |
| 1.432804 | 6.72E-11    | not DE   | not DE   | not DE | not DE | 2.084411 | 3.06E-25    |
| not DE   | not DE      | not DE   | not DE   | not DE | not DE | 1.178127 | 0.006464354 |
| not DE   | not DE      | not DE   | not DE   | not DE | not DE | not DE   | not DE      |
| not DE   | not DE      | not DE   | not DE   | not DE | not DE | not DE   | not DE      |
| not DE   | not DE      | not DE   | not DE   | not DE | not DE | 1.710491 | 0.021114473 |
| 1.604217 | 0.000981613 | not DE   | not DE   | not DE | not DE | 3.29735  | 2.77E-06    |
| not DE   | not DE      | not DE   | not DE   | not DE | not DE | not DE   | not DE      |
| -2.29586 | 1.94E-08    | not DE   | not DE   | not DE | not DE | -1.33607 | 0.002387088 |
| not DE   | not DE      | not DE   | not DE   | not DE | not DE | 1.112652 | 0.014285917 |
| not DE   | not DE      | not DE   | not DE   | not DE | not DE | not DE   | not DE      |
| not DE   | not DE      | not DE   | not DE   | not DE | not DE | not DE   | not DE      |
| not DE   | not DE      | not DE   | not DE   | not DE | not DE | not DE   | not DE      |
| -1.01401 | 0.001375153 | not DE   | not DE   | not DE | not DE | -1.23063 | 0.017056658 |
| not DE   | not DE      | not DE   | not DE   | not DE | not DE | not DE   | not DE      |
| not DE   | not DE      | not DE   | not DE   | not DE | not DE | not DE   | not DE      |
| not DE   | not DE      | not DE   | not DE   | not DE | not DE | not DE   | not DE      |
| not DE   | not DE      | not DE   | not DE   | not DE | not DE | -1.10972 | 0.000486412 |
| -2.29884 | 0.00082691  | not DE   | not DE   | not DE | not DE | -2.78353 | 0.000863322 |
| not DE   | not DE      | not DE   | not DE   | not DE | not DE | not DE   | not DE      |
| not DE   | not DE      | not DE   | not DE   | not DE | not DE | not DE   | not DE      |
| -2.73183 | 0.003425389 | -3.24007 | 0.010821 | not DE | not DE | -4.14905 | 1.61E-05    |
| not DE   | not DE      | not DE   | not DE   | not DE | not DE | not DE   | not DE      |
| not DE   | not DE      | not DE   | not DE   | not DE | not DE | not DE   | not DE      |
| not DE   | not DE      | not DE   | not DE   | not DE | not DE | not DE   | not DE      |
| not DE   | not DE      | not DE   | not DE   | not DE | not DE | not DE   | not DE      |
| not DE   | not DE      | not DE   | not DE   | not DE | not DE | not DE   | not DE      |
| not DE   | not DE      | not DE   | not DE   | not DE | not DE | not DE   | not DE      |
| not DE   | not DE      | not DE   | not DE   | not DE | not DE | not DE   | not DE      |
| not DE   | not DE      | not DE   | not DE   | not DE | not DE | not DE   | not DE      |
| not DE   | not DE      | not DE   | not DE   | not DE | not DE | not DE   | not DE      |
| not DE   | not DE      | not DE   | not DE   | not DE | not DE | -1.81392 | 0.042813232 |
| not DE   | not DE      | not DE   | not DE   | not DE | not DE | not DE   | not DE      |
| not DE   | not DE      | not DE   | not DE   | not DE | not DE | not DE   | not DE      |
| not DE   | not DE      | not DE   | not DE   | not DE | not DE | not DE   | not DE      |
| not DE   | not DE      | not DE   | not DE   | not DE | not DE | not DE   | not DE      |
| not DE   | not DE      | -2.21359 | 0.005061 | not DE | not DE | not DE   | not DE      |
| not DE   | not DE      | not DE   | not DE   | not DE | not DE | -1.33534 | 2.41E-08    |













































































|                        |        |        |                     |                        |                        |
|------------------------|--------|--------|---------------------|------------------------|------------------------|
| 1. 003972 1. 70E-06    | not DE | not DE | not DE              | not DE                 | 1. 474656 5. 13E-06    |
| 1. 11933 0. 007062159  | not DE | not DE | not DE              | not DE                 | 1. 156269 0. 011255575 |
| -3. 09082 5. 94E-05    | not DE | not DE | not DE              | not DE                 | -2. 12125 0. 004208708 |
| not DE not DE          | not DE | not DE | not DE              | not DE                 | -1. 14406 5. 94E-05    |
| not DE not DE          | not DE | not DE | not DE              | not DE                 | not DE not DE          |
| not DE not DE          | not DE | not DE | 1. 803969 0. 012397 | not DE                 | not DE not DE          |
| not DE not DE          | not DE | not DE | not DE              | not DE                 | not DE not DE          |
| not DE not DE          | not DE | not DE | not DE              | not DE                 | not DE not DE          |
| 1. 238561 0. 000802303 | not DE | not DE | not DE              | not DE                 | 1. 057212 0. 010253387 |
| not DE not DE          | not DE | not DE | not DE              | not DE                 | not DE not DE          |
| not DE not DE          | not DE | not DE | not DE              | not DE                 | not DE not DE          |
| not DE not DE          | not DE | not DE | not DE              | not DE                 | not DE not DE          |
| not DE not DE          | not DE | not DE | not DE              | not DE                 | not DE not DE          |
| not DE not DE          | not DE | not DE | not DE              | not DE                 | not DE not DE          |
| not DE not DE          | not DE | not DE | not DE              | not DE                 | not DE not DE          |
| not DE not DE          | not DE | not DE | not DE              | not DE                 | not DE not DE          |
| not DE not DE          | not DE | not DE | not DE              | not DE                 | not DE not DE          |
| not DE not DE          | not DE | not DE | not DE              | not DE                 | not DE not DE          |
| not DE not DE          | not DE | not DE | not DE              | not DE                 | 1. 09733 2. 89E-06     |
| not DE not DE          | not DE | not DE | not DE              | not DE                 | not DE not DE          |
| not DE not DE          | not DE | not DE | not DE              | not DE                 | -1. 06324 0. 003684504 |
| not DE not DE          | not DE | not DE | not DE              | not DE                 | not DE not DE          |
| not DE not DE          | not DE | not DE | not DE              | not DE                 | not DE not DE          |
| not DE not DE          | not DE | not DE | not DE              | not DE                 | not DE not DE          |
| -1. 14467 0. 00032827  | not DE | not DE | not DE              | not DE                 | -2. 10929 6. 80E-07    |
| not DE not DE          | not DE | not DE | not DE              | not DE                 | not DE not DE          |
| not DE not DE          | not DE | not DE | not DE              | not DE                 | 1. 01233 0. 030643466  |
| not DE not DE          | not DE | not DE | not DE              | not DE                 | not DE not DE          |
| not DE not DE          | not DE | not DE | not DE              | not DE                 | not DE not DE          |
| 1. 633161 0. 000217023 | not DE | not DE | 1. 238271 6. 67E-05 | 1. 094023 0. 049047364 |                        |
| not DE not DE          | not DE | not DE | 1. 524686 0. 011226 | not DE not DE          |                        |
| not DE not DE          | not DE | not DE | not DE              | not DE                 | not DE not DE          |
| 1. 338124 9. 89E-15    | not DE | not DE | not DE              | not DE                 | not DE not DE          |
| not DE not DE          | not DE | not DE | not DE              | not DE                 | -1. 45913 0. 038726873 |
| not DE not DE          | not DE | not DE | not DE              | not DE                 | not DE not DE          |
| not DE not DE          | not DE | not DE | not DE              | not DE                 | not DE not DE          |
| not DE not DE          | not DE | not DE | not DE              | not DE                 | not DE not DE          |
| 1. 418472 3. 52E-05    | not DE | not DE | not DE              | not DE                 | 1. 454579 0. 004613029 |
| not DE not DE          | not DE | not DE | not DE              | not DE                 | not DE not DE          |
| not DE not DE          | not DE | not DE | not DE              | not DE                 | not DE not DE          |
| not DE not DE          | not DE | not DE | not DE              | not DE                 | not DE not DE          |
| not DE not DE          | not DE | not DE | not DE              | not DE                 | not DE not DE          |
| not DE not DE          | not DE | not DE | not DE              | not DE                 | not DE not DE          |
| not DE not DE          | not DE | not DE | not DE              | not DE                 | not DE not DE          |
| not DE not DE          | not DE | not DE | not DE              | not DE                 | not DE not DE          |
| not DE not DE          | not DE | not DE | not DE              | not DE                 | not DE not DE          |
| not DE not DE          | not DE | not DE | not DE              | not DE                 | 1. 353752 0. 035321007 |
| not DE not DE          | not DE | not DE | not DE              | not DE                 | not DE not DE          |
| not DE not DE          | not DE | not DE | not DE              | not DE                 | not DE not DE          |
| -1. 85246 1. 01E-11    | not DE | not DE | not DE              | not DE                 | -1. 4328 8. 88E-07     |
| not DE not DE          | not DE | not DE | not DE              | not DE                 | not DE not DE          |
| not DE not DE          | not DE | not DE | not DE              | not DE                 | not DE not DE          |
| not DE not DE          | not DE | not DE | not DE              | not DE                 | not DE not DE          |
| not DE not DE          | not DE | not DE | not DE              | not DE                 | not DE not DE          |
| not DE not DE          | not DE | not DE | not DE              | not DE                 | not DE not DE          |
| not DE not DE          | not DE | not DE | not DE              | not DE                 | -3. 40251 0. 024562989 |



























|          |             |          |          |          |          |          |             |
|----------|-------------|----------|----------|----------|----------|----------|-------------|
| not DE   | not DE      | not DE   | not DE   | not DE   | not DE   | not DE   | not DE      |
| not DE   | not DE      | not DE   | not DE   | not DE   | not DE   | -1.37659 | 6.78E-06    |
| not DE   | not DE      | not DE   | not DE   | not DE   | not DE   | not DE   | not DE      |
| -1.70687 | 0.001644909 | not DE   | not DE   | not DE   | not DE   | -1.80999 | 0.001372698 |
| not DE   | not DE      | not DE   | not DE   | not DE   | not DE   | -3.13339 | 0.004009818 |
| not DE   | not DE      | not DE   | not DE   | not DE   | not DE   | not DE   | not DE      |
| not DE   | not DE      | not DE   | not DE   | not DE   | not DE   | not DE   | not DE      |
| not DE   | not DE      | not DE   | not DE   | not DE   | not DE   | not DE   | not DE      |
| not DE   | not DE      | not DE   | not DE   | not DE   | not DE   | not DE   | not DE      |
| not DE   | not DE      | not DE   | not DE   | not DE   | not DE   | not DE   | not DE      |
| not DE   | not DE      | not DE   | not DE   | not DE   | not DE   | not DE   | not DE      |
| not DE   | not DE      | not DE   | not DE   | not DE   | not DE   | not DE   | not DE      |
| not DE   | not DE      | not DE   | not DE   | not DE   | not DE   | not DE   | not DE      |
| 2.343096 | 0.00014149  | not DE   | not DE   | not DE   | not DE   | 2.142834 | 0.000100063 |
| not DE   | not DE      | not DE   | not DE   | not DE   | not DE   | not DE   | not DE      |
| not DE   | not DE      | not DE   | not DE   | not DE   | not DE   | not DE   | not DE      |
| -1.70989 | 0.030854513 | not DE   | not DE   | not DE   | not DE   | not DE   | not DE      |
| -1.73655 | 2.18E-08    | not DE   | not DE   | not DE   | not DE   | -2.24537 | 1.11E-06    |
| not DE   | not DE      | 1.697807 | 0.001813 | not DE   | not DE   | 1.641041 | 0.000417398 |
| not DE   | not DE      | not DE   | not DE   | not DE   | not DE   | not DE   | not DE      |
| -2.61043 | 0.012138188 | not DE   | not DE   | not DE   | not DE   | -2.74824 | 0.011308424 |
| not DE   | not DE      | not DE   | not DE   | not DE   | not DE   | not DE   | not DE      |
| not DE   | not DE      | not DE   | not DE   | not DE   | not DE   | not DE   | not DE      |
| not DE   | not DE      | not DE   | not DE   | not DE   | not DE   | not DE   | not DE      |
| not DE   | not DE      | not DE   | not DE   | not DE   | not DE   | not DE   | not DE      |
| not DE   | not DE      | not DE   | not DE   | not DE   | not DE   | not DE   | not DE      |
| not DE   | not DE      | not DE   | not DE   | not DE   | not DE   | not DE   | not DE      |
| not DE   | not DE      | not DE   | not DE   | not DE   | not DE   | not DE   | not DE      |
| -1.61523 | 3.24E-05    | not DE   | not DE   | -1.09945 | 0.000125 | -1.43019 | 0.012683714 |
| not DE   | not DE      | not DE   | not DE   | not DE   | not DE   | not DE   | not DE      |
| -2.24607 | 2.28E-05    | not DE   | not DE   | not DE   | not DE   | -2.19439 | 0.009502537 |
| not DE   | not DE      | not DE   | not DE   | not DE   | not DE   | not DE   | not DE      |
| not DE   | not DE      | not DE   | not DE   | not DE   | not DE   | not DE   | not DE      |
| not DE   | not DE      | not DE   | not DE   | not DE   | not DE   | not DE   | not DE      |
| not DE   | not DE      | not DE   | not DE   | not DE   | not DE   | not DE   | not DE      |
| not DE   | not DE      | 1.718347 | 0.00106  | not DE   | not DE   | not DE   | not DE      |
| 2.927895 | 9.26E-07    | not DE   | not DE   | not DE   | not DE   | 2.486691 | 0.002236976 |
| 2.853983 | 2.39E-05    | not DE   | not DE   | not DE   | not DE   | not DE   | not DE      |
| not DE   | not DE      | not DE   | not DE   | not DE   | not DE   | not DE   | not DE      |
| not DE   | not DE      | not DE   | not DE   | not DE   | not DE   | not DE   | not DE      |
| not DE   | not DE      | not DE   | not DE   | not DE   | not DE   | not DE   | not DE      |
| not DE   | not DE      | not DE   | not DE   | not DE   | not DE   | not DE   | not DE      |
| not DE   | not DE      | not DE   | not DE   | not DE   | not DE   | not DE   | not DE      |
| not DE   | not DE      | not DE   | not DE   | not DE   | not DE   | not DE   | not DE      |
| not DE   | not DE      | not DE   | not DE   | not DE   | not DE   | not DE   | not DE      |
| not DE   | not DE      | not DE   | not DE   | not DE   | not DE   | not DE   | not DE      |
| not DE   | not DE      | not DE   | not DE   | not DE   | not DE   | not DE   | not DE      |
| 1.364727 | 4.10E-06    | not DE   | not DE   | not DE   | not DE   | 2.541772 | 8.98E-13    |
| not DE   | not DE      | not DE   | not DE   | not DE   | not DE   | not DE   | not DE      |
| not DE   | not DE      | not DE   | not DE   | not DE   | not DE   | not DE   | not DE      |
| not DE   | not DE      | not DE   | not DE   | not DE   | not DE   | not DE   | not DE      |
| not DE   | not DE      | not DE   | not DE   | not DE   | not DE   | not DE   | not DE      |
| not DE   | not DE      | not DE   | not DE   | not DE   | not DE   | not DE   | not DE      |
| not DE   | not DE      | not DE   | not DE   | not DE   | not DE   | not DE   | not DE      |
| not DE   | not DE      | not DE   | not DE   | not DE   | not DE   | not DE   | not DE      |
| not DE   | not DE      | not DE   | not DE   | not DE   | not DE   | not DE   | not DE      |
| not DE   | not DE      | not DE   | not DE   | not DE   | not DE   | not DE   | not DE      |
| 3.452443 | 6.08E-07    | 3.344425 | 0.001781 | 1.7762   | 0.002514 | 5.151904 | 6.84E-21    |
| not DE   | not DE      | not DE   | not DE   | not DE   | not DE   | not DE   | not DE      |
| not DE   | not DE      | not DE   | not DE   | not DE   | not DE   | not DE   | not DE      |
| not DE   | not DE      | 8.135984 | 0.009953 | not DE   | not DE   | not DE   | not DE      |
| not DE   | not DE      | not DE   | not DE   | not DE   | not DE   | not DE   | not DE      |
| not DE   | not DE      | not DE   | not DE   | not DE   | not DE   | not DE   | not DE      |
| not DE   | not DE      | not DE   | not DE   | not DE   | not DE   | not DE   | not DE      |
| not DE   | not DE      | not DE   | not DE   | not DE   | not DE   | not DE   | not DE      |
| not DE   | not DE      | not DE   | not DE   | not DE   | not DE   | -1.55871 | 0.00080876  |

|          |             |          |          |          |          |          |             |
|----------|-------------|----------|----------|----------|----------|----------|-------------|
| not DE   | not DE      | not DE   | not DE   | not DE   | not DE   | not DE   | not DE      |
| not DE   | not DE      | not DE   | not DE   | -4.422   | 0.000713 | not DE   | not DE      |
| not DE   | not DE      | not DE   | not DE   | not DE   | not DE   | not DE   | not DE      |
| -2.30932 | 0.000937781 | not DE   | not DE   | not DE   | not DE   | -1.65218 | 0.033662149 |
| not DE   | not DE      | not DE   | not DE   | not DE   | not DE   | not DE   | not DE      |
| not DE   | not DE      | 8.511959 | 0.018747 | not DE   | not DE   | not DE   | not DE      |
| not DE   | not DE      | not DE   | not DE   | not DE   | not DE   | not DE   | not DE      |
| not DE   | not DE      | not DE   | not DE   | not DE   | not DE   | -1.28971 | 0.004317127 |
| not DE   | not DE      | not DE   | not DE   | not DE   | not DE   | not DE   | not DE      |
| not DE   | not DE      | not DE   | not DE   | 1.112268 | 0.003876 | not DE   | not DE      |
| not DE   | not DE      | not DE   | not DE   | not DE   | not DE   | not DE   | not DE      |
| not DE   | not DE      | not DE   | not DE   | not DE   | not DE   | not DE   | not DE      |
| not DE   | not DE      | not DE   | not DE   | not DE   | not DE   | not DE   | not DE      |
| not DE   | not DE      | not DE   | not DE   | not DE   | not DE   | not DE   | not DE      |
| not DE   | not DE      | not DE   | not DE   | not DE   | not DE   | not DE   | not DE      |
| not DE   | not DE      | not DE   | not DE   | not DE   | not DE   | not DE   | not DE      |
| not DE   | not DE      | not DE   | not DE   | not DE   | not DE   | not DE   | not DE      |
| not DE   | not DE      | not DE   | not DE   | not DE   | not DE   | not DE   | not DE      |
| not DE   | not DE      | not DE   | not DE   | not DE   | not DE   | not DE   | not DE      |
| not DE   | not DE      | not DE   | not DE   | not DE   | not DE   | not DE   | not DE      |
| not DE   | not DE      | not DE   | not DE   | not DE   | not DE   | not DE   | not DE      |
| not DE   | not DE      | not DE   | not DE   | not DE   | not DE   | not DE   | not DE      |
| not DE   | not DE      | not DE   | not DE   | not DE   | not DE   | not DE   | not DE      |
| not DE   | not DE      | not DE   | not DE   | not DE   | not DE   | not DE   | not DE      |
| not DE   | not DE      | 2.46039  | 0.010683 | not DE   | not DE   | not DE   | not DE      |
| not DE   | not DE      | not DE   | not DE   | not DE   | not DE   | not DE   | not DE      |
| not DE   | not DE      | not DE   | not DE   | not DE   | not DE   | not DE   | not DE      |
| not DE   | not DE      | not DE   | not DE   | not DE   | not DE   | not DE   | not DE      |
| -2.19477 | 0.006963413 | not DE   | not DE   | not DE   | not DE   | -2.54712 | 0.001594678 |
| 1.269176 | 0.002274491 | 1.743894 | 0.018466 | not DE   | not DE   | 2.506431 | 1.43E-12    |
| -3.34164 | 1.23E-06    | not DE   | not DE   | not DE   | not DE   | -5.31097 | 1.98E-16    |
| not DE   | not DE      | not DE   | not DE   | not DE   | not DE   | not DE   | not DE      |
| not DE   | not DE      | not DE   | not DE   | not DE   | not DE   | not DE   | not DE      |
| -1.66257 | 0.014984666 | not DE   | not DE   | not DE   | not DE   | -4.03903 | 1.43E-07    |
| not DE   | not DE      | not DE   | not DE   | not DE   | not DE   | not DE   | not DE      |
| not DE   | not DE      | not DE   | not DE   | not DE   | not DE   | not DE   | not DE      |
| not DE   | not DE      | -2.82149 | 0.027735 | -2.59371 | 0.023277 | not DE   | not DE      |
| not DE   | not DE      | not DE   | not DE   | not DE   | not DE   | not DE   | not DE      |
| not DE   | not DE      | not DE   | not DE   | not DE   | not DE   | not DE   | not DE      |
| not DE   | not DE      | not DE   | not DE   | not DE   | not DE   | not DE   | not DE      |
| not DE   | not DE      | not DE   | not DE   | not DE   | not DE   | not DE   | not DE      |
| not DE   | not DE      | not DE   | not DE   | not DE   | not DE   | not DE   | not DE      |
| -1.84188 | 0.01843985  | not DE   | not DE   | not DE   | not DE   | -1.66206 | 0.001047488 |
| not DE   | not DE      | not DE   | not DE   | not DE   | not DE   | not DE   | not DE      |
| not DE   | not DE      | not DE   | not DE   | not DE   | not DE   | -1.55157 | 0.029889862 |
| -1.07413 | 0.010715107 | not DE   | not DE   | not DE   | not DE   | -1.02664 | 0.00606661  |
| not DE   | not DE      | not DE   | not DE   | not DE   | not DE   | not DE   | not DE      |
| not DE   | not DE      | not DE   | not DE   | not DE   | not DE   | not DE   | not DE      |
| not DE   | not DE      | not DE   | not DE   | not DE   | not DE   | -3.05681 | 0.041158912 |
| not DE   | not DE      | not DE   | not DE   | not DE   | not DE   | -1.52075 | 0.005852692 |
| not DE   | not DE      | not DE   | not DE   | not DE   | not DE   | not DE   | not DE      |
| not DE   | not DE      | not DE   | not DE   | not DE   | not DE   | not DE   | not DE      |
| not DE   | not DE      | not DE   | not DE   | -1.07283 | 0.024838 | not DE   | not DE      |
| -1.88595 | 1.53E-06    | not DE   | not DE   | not DE   | not DE   | -1.97784 | 1.16E-05    |

















|          |             |          |          |          |          |          |             |
|----------|-------------|----------|----------|----------|----------|----------|-------------|
| not DE   | not DE      | not DE   | not DE   | not DE   | not DE   | not DE   | not DE      |
| not DE   | not DE      | not DE   | not DE   | not DE   | not DE   | not DE   | not DE      |
| not DE   | not DE      | not DE   | not DE   | not DE   | not DE   | not DE   | not DE      |
| not DE   | not DE      | not DE   | not DE   | not DE   | not DE   | not DE   | not DE      |
| not DE   | not DE      | not DE   | not DE   | not DE   | not DE   | not DE   | not DE      |
| not DE   | not DE      | not DE   | not DE   | not DE   | not DE   | not DE   | not DE      |
| not DE   | not DE      | not DE   | not DE   | not DE   | not DE   | -1.16703 | 0.011031507 |
| not DE   | not DE      | not DE   | not DE   | not DE   | not DE   | not DE   | not DE      |
| not DE   | not DE      | not DE   | not DE   | not DE   | not DE   | not DE   | not DE      |
| not DE   | not DE      | not DE   | not DE   | not DE   | not DE   | not DE   | not DE      |
| not DE   | not DE      | not DE   | not DE   | not DE   | not DE   | not DE   | not DE      |
| not DE   | not DE      | not DE   | not DE   | not DE   | not DE   | not DE   | not DE      |
| not DE   | not DE      | not DE   | not DE   | not DE   | not DE   | not DE   | not DE      |
| not DE   | not DE      | not DE   | not DE   | not DE   | not DE   | not DE   | not DE      |
| not DE   | not DE      | not DE   | not DE   | not DE   | not DE   | -1.04477 | 2.96E-08    |
| not DE   | not DE      | not DE   | not DE   | not DE   | not DE   | not DE   | not DE      |
| not DE   | not DE      | not DE   | not DE   | not DE   | not DE   | not DE   | not DE      |
| not DE   | not DE      | not DE   | not DE   | not DE   | not DE   | not DE   | not DE      |
| -1.30067 | 0.004273918 | not DE   | not DE   | not DE   | not DE   | -1.66011 | 0.005318581 |
| not DE   | not DE      | not DE   | not DE   | not DE   | not DE   | 1.603667 | 0.006217509 |
| not DE   | not DE      | not DE   | not DE   | not DE   | not DE   | not DE   | not DE      |
| not DE   | not DE      | 1.996203 | 0.036571 | not DE   | not DE   | not DE   | not DE      |
| not DE   | not DE      | not DE   | not DE   | not DE   | not DE   | not DE   | not DE      |
| not DE   | not DE      | not DE   | not DE   | not DE   | not DE   | not DE   | not DE      |
| not DE   | not DE      | not DE   | not DE   | not DE   | not DE   | not DE   | not DE      |
| not DE   | not DE      | not DE   | not DE   | not DE   | not DE   | not DE   | not DE      |
| not DE   | not DE      | not DE   | not DE   | not DE   | not DE   | 1.510174 | 0.00845262  |
| not DE   | not DE      | not DE   | not DE   | not DE   | not DE   | not DE   | not DE      |
| not DE   | not DE      | not DE   | not DE   | not DE   | not DE   | not DE   | not DE      |
| not DE   | not DE      | not DE   | not DE   | not DE   | not DE   | not DE   | not DE      |
| not DE   | not DE      | not DE   | not DE   | not DE   | not DE   | not DE   | not DE      |
| not DE   | not DE      | not DE   | not DE   | not DE   | not DE   | not DE   | not DE      |
| not DE   | not DE      | not DE   | not DE   | not DE   | not DE   | not DE   | not DE      |
| not DE   | not DE      | not DE   | not DE   | not DE   | not DE   | not DE   | not DE      |
| not DE   | not DE      | not DE   | not DE   | not DE   | not DE   | -1.97551 | 0.000281557 |
| not DE   | not DE      | not DE   | not DE   | not DE   | not DE   | not DE   | not DE      |
| 1.851011 | 0.000559963 | not DE   | not DE   | -1.48165 | 0.000755 | 1.073178 | 0.016548657 |
| not DE   | not DE      | not DE   | not DE   | not DE   | not DE   | not DE   | not DE      |
| not DE   | not DE      | not DE   | not DE   | not DE   | not DE   | not DE   | not DE      |
| not DE   | not DE      | not DE   | not DE   | not DE   | not DE   | not DE   | not DE      |
| 2.604176 | 3.21E-13    | 1.354363 | 0.004969 | not DE   | not DE   | 2.547471 | 0.000162321 |
| -1.31335 | 5.92E-05    | not DE   | not DE   | not DE   | not DE   | not DE   | not DE      |
| not DE   | not DE      | not DE   | not DE   | not DE   | not DE   | not DE   | not DE      |
| not DE   | not DE      | not DE   | not DE   | not DE   | not DE   | not DE   | not DE      |
| -1.669   | 6.87E-05    | not DE   | not DE   | not DE   | not DE   | -2.66567 | 5.71E-10    |
| not DE   | not DE      | not DE   | not DE   | not DE   | not DE   | not DE   | not DE      |
| not DE   | not DE      | not DE   | not DE   | not DE   | not DE   | not DE   | not DE      |
| not DE   | not DE      | not DE   | not DE   | not DE   | not DE   | not DE   | not DE      |
| not DE   | not DE      | not DE   | not DE   | not DE   | not DE   | not DE   | not DE      |
| not DE   | not DE      | not DE   | not DE   | not DE   | not DE   | -1.09734 | 4.61E-05    |
| not DE   | not DE      | not DE   | not DE   | not DE   | not DE   | not DE   | not DE      |
| not DE   | not DE      | not DE   | not DE   | not DE   | not DE   | -2.98171 | 0.000580534 |
| not DE   | not DE      | not DE   | not DE   | not DE   | not DE   | not DE   | not DE      |
| not DE   | not DE      | not DE   | not DE   | not DE   | not DE   | not DE   | not DE      |
| not DE   | not DE      | not DE   | not DE   | not DE   | not DE   | -1.4933  | 0.03266671  |























|          |             |          |          |          |          |          |             |
|----------|-------------|----------|----------|----------|----------|----------|-------------|
| not DE   | not DE      | not DE   | not DE   | not DE   | not DE   | not DE   | not DE      |
| not DE   | not DE      | not DE   | not DE   | not DE   | not DE   | not DE   | not DE      |
| not DE   | not DE      | not DE   | not DE   | not DE   | not DE   | not DE   | not DE      |
| -2.18191 | 0.024483219 | not DE   | not DE   | not DE   | not DE   | -2.5537  | 0.019072973 |
| -1.57459 | 0.00127202  | not DE   | not DE   | not DE   | not DE   | -2.21686 | 2.95E-07    |
| not DE   | not DE      | not DE   | not DE   | not DE   | not DE   | not DE   | not DE      |
| not DE   | not DE      | not DE   | not DE   | not DE   | not DE   | not DE   | not DE      |
| not DE   | not DE      | not DE   | not DE   | not DE   | not DE   | not DE   | not DE      |
| not DE   | not DE      | not DE   | not DE   | not DE   | not DE   | not DE   | not DE      |
| not DE   | not DE      | not DE   | not DE   | not DE   | not DE   | not DE   | not DE      |
| not DE   | not DE      | not DE   | not DE   | not DE   | not DE   | not DE   | not DE      |
| not DE   | not DE      | not DE   | not DE   | not DE   | not DE   | not DE   | not DE      |
| 1.742185 | 3.81E-10    | not DE   | not DE   | not DE   | not DE   | 1.78573  | 1.53E-06    |
| not DE   | not DE      | not DE   | not DE   | not DE   | not DE   | not DE   | not DE      |
| -2.80468 | 0.001832279 | not DE   | not DE   | not DE   | not DE   | -4.26807 | 8.52E-07    |
| -1.01046 | 3.75E-05    | not DE   | not DE   | not DE   | not DE   | -1.26535 | 0.003146837 |
| not DE   | not DE      | -2.62731 | 0.014756 | not DE   | not DE   | not DE   | not DE      |
| not DE   | not DE      | not DE   | not DE   | not DE   | not DE   | not DE   | not DE      |
| not DE   | not DE      | not DE   | not DE   | not DE   | not DE   | not DE   | not DE      |
| not DE   | not DE      | not DE   | not DE   | not DE   | not DE   | not DE   | not DE      |
| not DE   | not DE      | not DE   | not DE   | not DE   | not DE   | not DE   | not DE      |
| -1.21691 | 9.92E-09    | not DE   | not DE   | not DE   | not DE   | not DE   | not DE      |
| not DE   | not DE      | not DE   | not DE   | not DE   | not DE   | not DE   | not DE      |
| -1.49425 | 0.003944279 | not DE   | not DE   | not DE   | not DE   | -1.46067 | 0.004718775 |
| not DE   | not DE      | not DE   | not DE   | not DE   | not DE   | not DE   | not DE      |
| not DE   | not DE      | not DE   | not DE   | not DE   | not DE   | 1.522869 | 3.75E-08    |
| not DE   | not DE      | not DE   | not DE   | not DE   | not DE   | not DE   | not DE      |
| not DE   | not DE      | -1.50738 | 0.023183 | not DE   | not DE   | not DE   | not DE      |
| not DE   | not DE      | not DE   | not DE   | not DE   | not DE   | not DE   | not DE      |
| not DE   | not DE      | not DE   | not DE   | not DE   | not DE   | not DE   | not DE      |
| not DE   | not DE      | not DE   | not DE   | not DE   | not DE   | not DE   | not DE      |
| not DE   | not DE      | not DE   | not DE   | not DE   | not DE   | not DE   | not DE      |
| not DE   | not DE      | not DE   | not DE   | not DE   | not DE   | not DE   | not DE      |
| not DE   | not DE      | not DE   | not DE   | not DE   | not DE   | not DE   | not DE      |
| not DE   | not DE      | not DE   | not DE   | not DE   | not DE   | not DE   | not DE      |
| not DE   | not DE      | not DE   | not DE   | not DE   | not DE   | not DE   | not DE      |
| 2.471371 | 0.001158352 | not DE   | not DE   | not DE   | not DE   | 3.284595 | 4.02E-05    |
| not DE   | not DE      | not DE   | not DE   | not DE   | not DE   | not DE   | not DE      |
| not DE   | not DE      | not DE   | not DE   | not DE   | not DE   | not DE   | not DE      |
| not DE   | not DE      | not DE   | not DE   | not DE   | not DE   | not DE   | not DE      |
| not DE   | not DE      | not DE   | not DE   | not DE   | not DE   | not DE   | not DE      |
| not DE   | not DE      | not DE   | not DE   | 2.780198 | 6.29E-05 | not DE   | not DE      |
| not DE   | not DE      | not DE   | not DE   | not DE   | not DE   | not DE   | not DE      |
| not DE   | not DE      | not DE   | not DE   | not DE   | not DE   | not DE   | not DE      |
| not DE   | not DE      | not DE   | not DE   | not DE   | not DE   | not DE   | not DE      |
| not DE   | not DE      | not DE   | not DE   | not DE   | not DE   | not DE   | not DE      |
| not DE   | not DE      | not DE   | not DE   | not DE   | not DE   | not DE   | not DE      |
| not DE   | not DE      | not DE   | not DE   | not DE   | not DE   | not DE   | not DE      |
| not DE   | not DE      | not DE   | not DE   | not DE   | not DE   | not DE   | not DE      |
| not DE   | not DE      | not DE   | not DE   | not DE   | not DE   | not DE   | not DE      |
| 1.894048 | 0.009759992 | not DE   | not DE   | not DE   | not DE   | 1.408176 | 0.034793997 |
| not DE   | not DE      | not DE   | not DE   | not DE   | not DE   | not DE   | not DE      |
| 3.013718 | 0.004468441 | not DE   | not DE   | not DE   | not DE   | 2.710575 | 0.017830236 |
| not DE   | not DE      | not DE   | not DE   | not DE   | not DE   | not DE   | not DE      |
| not DE   | not DE      | not DE   | not DE   | not DE   | not DE   | not DE   | not DE      |
| -1.51615 | 2.89E-05    | not DE   | not DE   | not DE   | not DE   | -1.60238 | 0.005503569 |
| not DE   | not DE      | not DE   | not DE   | not DE   | not DE   | not DE   | not DE      |
| 1.933737 | 3.17E-09    | 2.657161 | 2.11E-08 | not DE   | not DE   | 1.871911 | 0.018646547 |



























|          |             |          |          |        |        |          |             |
|----------|-------------|----------|----------|--------|--------|----------|-------------|
| not DE   | not DE      | not DE   | not DE   | not DE | not DE | not DE   | not DE      |
| not DE   | not DE      | not DE   | not DE   | not DE | not DE | not DE   | not DE      |
| not DE   | not DE      | not DE   | not DE   | not DE | not DE | not DE   | not DE      |
| not DE   | not DE      | not DE   | not DE   | not DE | not DE | not DE   | not DE      |
| not DE   | not DE      | not DE   | not DE   | not DE | not DE | not DE   | not DE      |
| not DE   | not DE      | not DE   | not DE   | not DE | not DE | not DE   | not DE      |
| not DE   | not DE      | not DE   | not DE   | not DE | not DE | not DE   | not DE      |
| not DE   | not DE      | not DE   | not DE   | not DE | not DE | not DE   | not DE      |
| not DE   | not DE      | not DE   | not DE   | not DE | not DE | not DE   | not DE      |
| -1.12885 | 0.002300176 | not DE   | not DE   | not DE | not DE | -1.23393 | 0.003861593 |
| not DE   | not DE      | not DE   | not DE   | not DE | not DE | not DE   | not DE      |
| not DE   | not DE      | not DE   | not DE   | not DE | not DE | not DE   | not DE      |
| not DE   | not DE      | not DE   | not DE   | not DE | not DE | not DE   | not DE      |
| not DE   | not DE      | not DE   | not DE   | not DE | not DE | not DE   | not DE      |
| not DE   | not DE      | not DE   | not DE   | not DE | not DE | not DE   | not DE      |
| not DE   | not DE      | not DE   | not DE   | not DE | not DE | not DE   | not DE      |
| not DE   | not DE      | not DE   | not DE   | not DE | not DE | not DE   | not DE      |
| not DE   | not DE      | not DE   | not DE   | not DE | not DE | not DE   | not DE      |
| not DE   | not DE      | not DE   | not DE   | not DE | not DE | 1.686588 | 7.69E-07    |
| not DE   | not DE      | not DE   | not DE   | not DE | not DE | not DE   | not DE      |
| not DE   | not DE      | not DE   | not DE   | not DE | not DE | not DE   | not DE      |
| not DE   | not DE      | not DE   | not DE   | not DE | not DE | -2.85223 | 2.72E-08    |
| not DE   | not DE      | 4.578958 | 0.014757 | not DE | not DE | not DE   | not DE      |
| not DE   | not DE      | not DE   | not DE   | not DE | not DE | not DE   | not DE      |
| 2.445074 | 9.71E-08    | not DE   | not DE   | not DE | not DE | 2.931086 | 1.97E-16    |
| not DE   | not DE      | not DE   | not DE   | not DE | not DE | 2.186805 | 0.000916573 |
| not DE   | not DE      | not DE   | not DE   | not DE | not DE | not DE   | not DE      |
| not DE   | not DE      | not DE   | not DE   | not DE | not DE | not DE   | not DE      |
| not DE   | not DE      | not DE   | not DE   | not DE | not DE | not DE   | not DE      |
| not DE   | not DE      | not DE   | not DE   | not DE | not DE | not DE   | not DE      |
| not DE   | not DE      | not DE   | not DE   | not DE | not DE | not DE   | not DE      |
| not DE   | not DE      | not DE   | not DE   | not DE | not DE | not DE   | not DE      |
| not DE   | not DE      | not DE   | not DE   | not DE | not DE | not DE   | not DE      |
| not DE   | not DE      | not DE   | not DE   | not DE | not DE | not DE   | not DE      |
| 1.078379 | 0.000751482 | not DE   | not DE   | not DE | not DE | not DE   | not DE      |
| not DE   | not DE      | not DE   | not DE   | not DE | not DE | not DE   | not DE      |
| not DE   | not DE      | not DE   | not DE   | not DE | not DE | not DE   | not DE      |
| 1.352109 | 0.002197582 | not DE   | not DE   | not DE | not DE | not DE   | not DE      |
| not DE   | not DE      | not DE   | not DE   | not DE | not DE | not DE   | not DE      |
| not DE   | not DE      | not DE   | not DE   | not DE | not DE | not DE   | not DE      |
| not DE   | not DE      | not DE   | not DE   | not DE | not DE | not DE   | not DE      |
| not DE   | not DE      | not DE   | not DE   | not DE | not DE | not DE   | not DE      |
| not DE   | not DE      | not DE   | not DE   | not DE | not DE | not DE   | not DE      |
| -1.56294 | 0.022791261 | not DE   | not DE   | not DE | not DE | -1.47336 | 0.013725493 |
| not DE   | not DE      | not DE   | not DE   | not DE | not DE | 1.777652 | 2.30E-15    |
| not DE   | not DE      | not DE   | not DE   | not DE | not DE | not DE   | not DE      |
| not DE   | not DE      | not DE   | not DE   | not DE | not DE | not DE   | not DE      |
| -1.15145 | 7.05E-05    | not DE   | not DE   | not DE | not DE | -1.89985 | 2.52E-09    |
| not DE   | not DE      | not DE   | not DE   | not DE | not DE | not DE   | not DE      |
| not DE   | not DE      | not DE   | not DE   | not DE | not DE | -2.31997 | 0.001434688 |
| not DE   | not DE      | not DE   | not DE   | not DE | not DE | -1.96854 | 0.048152013 |
| not DE   | not DE      | not DE   | not DE   | not DE | not DE | not DE   | not DE      |
| -1.83868 | 4.33E-07    | not DE   | not DE   | not DE | not DE | -2.46853 | 1.06E-07    |
| not DE   | not DE      | not DE   | not DE   | not DE | not DE | not DE   | not DE      |
| not DE   | not DE      | not DE   | not DE   | not DE | not DE | not DE   | not DE      |
| not DE   | not DE      | not DE   | not DE   | not DE | not DE | 8.533386 | 2.88E-08    |
| 1.124803 | 0.005097799 | not DE   | not DE   | not DE | not DE | 1.208561 | 0.001489876 |
| not DE   | not DE      | not DE   | not DE   | not DE | not DE | not DE   | not DE      |
| not DE   | not DE      | not DE   | not DE   | not DE | not DE | not DE   | not DE      |
| not DE   | not DE      | not DE   | not DE   | not DE | not DE | not DE   | not DE      |
| not DE   | not DE      | not DE   | not DE   | not DE | not DE | not DE   | not DE      |
| not DE   | not DE      | not DE   | not DE   | not DE | not DE | not DE   | not DE      |
| -1.66999 | 0.007210448 | not DE   | not DE   | not DE | not DE | -2.77152 | 8.03E-05    |







|                      |                   |        |                   |        |                      |
|----------------------|-------------------|--------|-------------------|--------|----------------------|
| -1.48716 0.001192311 | not DE            | not DE | not DE            | not DE | -1.56747 5.25E-05    |
| not DE not DE        | not DE            | not DE | not DE            | not DE | not DE not DE        |
| not DE not DE        | not DE            | not DE | not DE            | not DE | not DE not DE        |
| not DE not DE        | not DE            | not DE | not DE            | not DE | not DE not DE        |
| -2.63815 0.003155531 | not DE            | not DE | not DE            | not DE | -4.49672 3.33E-05    |
| not DE not DE        | not DE            | not DE | not DE            | not DE | not DE not DE        |
| not DE not DE        | not DE            | not DE | not DE            | not DE | not DE not DE        |
| not DE not DE        | not DE            | not DE | not DE            | not DE | not DE not DE        |
| not DE not DE        | not DE            | not DE | not DE            | not DE | not DE not DE        |
| not DE not DE        | not DE            | not DE | not DE            | not DE | -1.01583 0.002515891 |
| not DE not DE        | not DE            | not DE | -1.01685 0.002533 | not DE | not DE               |
| not DE not DE        | not DE            | not DE | not DE            | not DE | not DE not DE        |
| not DE not DE        | -1.02836 0.022989 | not DE | not DE            | not DE | not DE not DE        |
| not DE not DE        | not DE            | not DE | not DE            | not DE | not DE not DE        |
| not DE not DE        | not DE            | not DE | not DE            | not DE | not DE not DE        |
| not DE not DE        | not DE            | not DE | not DE            | not DE | not DE not DE        |
| 1.339225 0.001220353 | not DE            | not DE | not DE            | not DE | not DE not DE        |
| not DE not DE        | not DE            | not DE | not DE            | not DE | not DE not DE        |
| not DE not DE        | not DE            | not DE | not DE            | not DE | not DE not DE        |
| -2.01765 6.22E-05    | not DE            | not DE | not DE            | not DE | -2.98553 0.000131203 |
| not DE not DE        | not DE            | not DE | not DE            | not DE | not DE not DE        |
| not DE not DE        | not DE            | not DE | not DE            | not DE | not DE not DE        |
| not DE not DE        | not DE            | not DE | not DE            | not DE | not DE not DE        |
| not DE not DE        | not DE            | not DE | not DE            | not DE | not DE not DE        |
| -3.56206 0.000563883 | not DE            | not DE | not DE            | not DE | -2.78225 0.000795156 |
| not DE not DE        | not DE            | not DE | not DE            | not DE | not DE not DE        |
| not DE not DE        | not DE            | not DE | not DE            | not DE | not DE not DE        |
| not DE not DE        | not DE            | not DE | not DE            | not DE | not DE not DE        |
| not DE not DE        | not DE            | not DE | not DE            | not DE | not DE not DE        |
| not DE not DE        | not DE            | not DE | not DE            | not DE | not DE not DE        |
| not DE not DE        | not DE            | not DE | not DE            | not DE | not DE not DE        |
| not DE not DE        | not DE            | not DE | not DE            | not DE | not DE not DE        |
| not DE not DE        | not DE            | not DE | not DE            | not DE | not DE not DE        |
| not DE not DE        | not DE            | not DE | not DE            | not DE | 1.808141 0.017298581 |
| not DE not DE        | not DE            | not DE | not DE            | not DE | not DE not DE        |
| not DE not DE        | not DE            | not DE | not DE            | not DE | not DE not DE        |
| -1.27614 0.004353393 | not DE            | not DE | not DE            | not DE | -2.33507 3.72E-06    |
| -1.60516 0.019392678 | not DE            | not DE | not DE            | not DE | -1.9363 5.58E-05     |
| not DE not DE        | not DE            | not DE | not DE            | not DE | not DE not DE        |
| not DE not DE        | not DE            | not DE | not DE            | not DE | not DE not DE        |
| not DE not DE        | not DE            | not DE | not DE            | not DE | not DE not DE        |
| not DE not DE        | not DE            | not DE | not DE            | not DE | not DE not DE        |
| not DE not DE        | not DE            | not DE | not DE            | not DE | not DE not DE        |
| not DE not DE        | not DE            | not DE | -1.08842 0.033292 | not DE | -2.03476 4.43E-08    |
| not DE not DE        | not DE            | not DE | not DE            | not DE | not DE not DE        |
| not DE not DE        | not DE            | not DE | not DE            | not DE | not DE not DE        |
| not DE not DE        | not DE            | not DE | not DE            | not DE | not DE not DE        |
| not DE not DE        | not DE            | not DE | not DE            | not DE | 2.162833 0.034793997 |
| not DE not DE        | not DE            | not DE | not DE            | not DE | 1.328914 7.85E-07    |
| not DE not DE        | not DE            | not DE | not DE            | not DE | not DE not DE        |
| not DE not DE        | not DE            | not DE | not DE            | not DE | not DE not DE        |
| not DE not DE        | not DE            | not DE | not DE            | not DE | not DE not DE        |
| not DE not DE        | not DE            | not DE | not DE            | not DE | not DE not DE        |
| 1.988427 0.031384277 | 5.797467 3.83E-13 | not DE | not DE            | not DE | 3.718237 0.000200757 |
| not DE not DE        | not DE            | not DE | not DE            | not DE | not DE not DE        |
| not DE not DE        | not DE            | not DE | not DE            | not DE | not DE not DE        |
| not DE not DE        | not DE            | not DE | not DE            | not DE | -1.18264 0.00429138  |
| not DE not DE        | 1.567033 0.042808 | not DE | not DE            | not DE | not DE not DE        |
| not DE not DE        | not DE            | not DE | not DE            | not DE | not DE not DE        |
| not DE not DE        | -2.62134 0.008793 | not DE | not DE            | not DE | -2.55516 0.001883716 |









|          |             |          |          |        |        |          |             |
|----------|-------------|----------|----------|--------|--------|----------|-------------|
| not DE   | not DE      | not DE   | not DE   | not DE | not DE | not DE   | not DE      |
| not DE   | not DE      | not DE   | not DE   | not DE | not DE | -1.84488 | 0.000329258 |
| not DE   | not DE      | not DE   | not DE   | not DE | not DE | not DE   | not DE      |
| not DE   | not DE      | not DE   | not DE   | not DE | not DE | not DE   | not DE      |
| not DE   | not DE      | not DE   | not DE   | not DE | not DE | not DE   | not DE      |
| not DE   | not DE      | not DE   | not DE   | not DE | not DE | not DE   | not DE      |
| not DE   | not DE      | not DE   | not DE   | not DE | not DE | not DE   | not DE      |
| not DE   | not DE      | not DE   | not DE   | not DE | not DE | not DE   | not DE      |
| not DE   | not DE      | not DE   | not DE   | not DE | not DE | not DE   | not DE      |
| not DE   | not DE      | not DE   | not DE   | not DE | not DE | not DE   | not DE      |
| not DE   | not DE      | not DE   | not DE   | not DE | not DE | not DE   | not DE      |
| not DE   | not DE      | not DE   | not DE   | not DE | not DE | not DE   | not DE      |
| not DE   | not DE      | not DE   | not DE   | not DE | not DE | not DE   | not DE      |
| not DE   | not DE      | not DE   | not DE   | not DE | not DE | not DE   | not DE      |
| not DE   | not DE      | not DE   | not DE   | not DE | not DE | not DE   | not DE      |
| not DE   | not DE      | not DE   | not DE   | not DE | not DE | 2.222574 | 0.000109402 |
| not DE   | not DE      | not DE   | not DE   | not DE | not DE | not DE   | not DE      |
| not DE   | not DE      | not DE   | not DE   | not DE | not DE | not DE   | not DE      |
| not DE   | not DE      | not DE   | not DE   | not DE | not DE | -1.16192 | 0.001769612 |
| not DE   | not DE      | not DE   | not DE   | not DE | not DE | not DE   | not DE      |
| not DE   | not DE      | not DE   | not DE   | not DE | not DE | not DE   | not DE      |
| not DE   | not DE      | 1.147973 | 0.01705  | not DE | not DE | 1.22729  | 3.48E-05    |
| 2.445104 | 4.80E-12    | 1.129807 | 0.000322 | not DE | not DE | 2.562628 | 1.93E-15    |
| not DE   | not DE      | not DE   | not DE   | not DE | not DE | not DE   | not DE      |
| -3.38735 | 0.001315828 | not DE   | not DE   | not DE | not DE | -5.17608 | 3.64E-07    |
| not DE   | not DE      | not DE   | not DE   | not DE | not DE | not DE   | not DE      |
| not DE   | not DE      | not DE   | not DE   | not DE | not DE | not DE   | not DE      |
| not DE   | not DE      | not DE   | not DE   | not DE | not DE | 1.74916  | 0.028173807 |
| not DE   | not DE      | not DE   | not DE   | not DE | not DE | not DE   | not DE      |
| not DE   | not DE      | not DE   | not DE   | not DE | not DE | not DE   | not DE      |
| not DE   | not DE      | not DE   | not DE   | not DE | not DE | not DE   | not DE      |
| not DE   | not DE      | not DE   | not DE   | not DE | not DE | not DE   | not DE      |
| not DE   | not DE      | not DE   | not DE   | not DE | not DE | not DE   | not DE      |
| not DE   | not DE      | not DE   | not DE   | not DE | not DE | 1.015706 | 1.29E-05    |
| not DE   | not DE      | not DE   | not DE   | not DE | not DE | not DE   | not DE      |
| not DE   | not DE      | not DE   | not DE   | not DE | not DE | not DE   | not DE      |
| not DE   | not DE      | not DE   | not DE   | not DE | not DE | not DE   | not DE      |
| not DE   | not DE      | not DE   | not DE   | not DE | not DE | 1.527789 | 0.011370993 |
| not DE   | not DE      | not DE   | not DE   | not DE | not DE | not DE   | not DE      |
| not DE   | not DE      | not DE   | not DE   | not DE | not DE | not DE   | not DE      |
| not DE   | not DE      | -1.51944 | 0.001057 | not DE | not DE | not DE   | not DE      |
| not DE   | not DE      | not DE   | not DE   | not DE | not DE | not DE   | not DE      |
| not DE   | not DE      | not DE   | not DE   | not DE | not DE | not DE   | not DE      |
| not DE   | not DE      | not DE   | not DE   | not DE | not DE | not DE   | not DE      |
| not DE   | not DE      | not DE   | not DE   | not DE | not DE | not DE   | not DE      |
| not DE   | not DE      | not DE   | not DE   | not DE | not DE | not DE   | not DE      |
| not DE   | not DE      | not DE   | not DE   | not DE | not DE | not DE   | not DE      |
| not DE   | not DE      | not DE   | not DE   | not DE | not DE | not DE   | not DE      |
| 1.361229 | 6.95E-08    | not DE   | not DE   | not DE | not DE | 1.697346 | 1.19E-09    |
| not DE   | not DE      | not DE   | not DE   | not DE | not DE | not DE   | not DE      |
| -1.38691 | 0.022671369 | not DE   | not DE   | not DE | not DE | -2.41622 | 8.43E-06    |
| not DE   | not DE      | not DE   | not DE   | not DE | not DE | -1.05683 | 0.006024462 |
| not DE   | not DE      | not DE   | not DE   | not DE | not DE | not DE   | not DE      |
| 1.171297 | 0.008162273 | 1.797853 | 0.048917 | not DE | not DE | not DE   | not DE      |
| not DE   | not DE      | not DE   | not DE   | not DE | not DE | not DE   | not DE      |
| not DE   | not DE      | not DE   | not DE   | not DE | not DE | not DE   | not DE      |
| not DE   | not DE      | not DE   | not DE   | not DE | not DE | not DE   | not DE      |
| not DE   | not DE      | not DE   | not DE   | not DE | not DE | not DE   | not DE      |
| not DE   | not DE      | not DE   | not DE   | not DE | not DE | -2.51683 | 0.000118732 |

|           |              |           |           |        |        |           |              |
|-----------|--------------|-----------|-----------|--------|--------|-----------|--------------|
| not DE    | not DE       | not DE    | not DE    | not DE | not DE | not DE    | not DE       |
| not DE    | not DE       | not DE    | not DE    | not DE | not DE | not DE    | not DE       |
| not DE    | not DE       | not DE    | not DE    | not DE | not DE | not DE    | not DE       |
| not DE    | not DE       | not DE    | not DE    | not DE | not DE | not DE    | not DE       |
| not DE    | not DE       | not DE    | not DE    | not DE | not DE | -2. 20708 | 0. 001985717 |
| not DE    | not DE       | 1. 689741 | 0. 031819 | not DE | not DE | not DE    | not DE       |
| not DE    | not DE       | not DE    | not DE    | not DE | not DE | not DE    | not DE       |
| 1. 281343 | 2. 51E-05    | not DE    | not DE    | not DE | not DE | 1. 374443 | 8. 03E-05    |
| not DE    | not DE       | not DE    | not DE    | not DE | not DE | not DE    | not DE       |
| not DE    | not DE       | not DE    | not DE    | not DE | not DE | 1. 034047 | 0. 019557974 |
| not DE    | not DE       | not DE    | not DE    | not DE | not DE | not DE    | not DE       |
| not DE    | not DE       | not DE    | not DE    | not DE | not DE | not DE    | not DE       |
| not DE    | not DE       | not DE    | not DE    | not DE | not DE | not DE    | not DE       |
| not DE    | not DE       | not DE    | not DE    | not DE | not DE | not DE    | not DE       |
| not DE    | not DE       | not DE    | not DE    | not DE | not DE | -1. 56523 | 0. 000743918 |
| not DE    | not DE       | not DE    | not DE    | not DE | not DE | not DE    | not DE       |
| not DE    | not DE       | -2. 17598 | 0. 04586  | not DE | not DE | not DE    | not DE       |
| not DE    | not DE       | not DE    | not DE    | not DE | not DE | not DE    | not DE       |
| not DE    | not DE       | not DE    | not DE    | not DE | not DE | not DE    | not DE       |
| not DE    | not DE       | not DE    | not DE    | not DE | not DE | not DE    | not DE       |
| not DE    | not DE       | not DE    | not DE    | not DE | not DE | 1. 220349 | 0. 04256401  |
| not DE    | not DE       | not DE    | not DE    | not DE | not DE | not DE    | not DE       |
| 1. 153889 | 0. 017757595 | not DE    | not DE    | not DE | not DE | 1. 354667 | 0. 049221116 |
| not DE    | not DE       | not DE    | not DE    | not DE | not DE | not DE    | not DE       |
| not DE    | not DE       | not DE    | not DE    | not DE | not DE | not DE    | not DE       |
| not DE    | not DE       | not DE    | not DE    | not DE | not DE | not DE    | not DE       |
| not DE    | not DE       | not DE    | not DE    | not DE | not DE | not DE    | not DE       |
| not DE    | not DE       | not DE    | not DE    | not DE | not DE | not DE    | not DE       |
| not DE    | not DE       | not DE    | not DE    | not DE | not DE | not DE    | not DE       |
| not DE    | not DE       | not DE    | not DE    | not DE | not DE | not DE    | not DE       |
| not DE    | not DE       | not DE    | not DE    | not DE | not DE | not DE    | not DE       |
| not DE    | not DE       | 2. 537819 | 0. 036435 | not DE | not DE | 2. 669785 | 0. 002635044 |
| -2. 04167 | 0. 001491398 | not DE    | not DE    | not DE | not DE | not DE    | not DE       |
| not DE    | not DE       | not DE    | not DE    | not DE | not DE | not DE    | not DE       |
| not DE    | not DE       | not DE    | not DE    | not DE | not DE | not DE    | not DE       |
| not DE    | not DE       | not DE    | not DE    | not DE | not DE | not DE    | not DE       |
| 1. 687265 | 0. 034940218 | not DE    | not DE    | not DE | not DE | not DE    | not DE       |
| not DE    | not DE       | not DE    | not DE    | not DE | not DE | not DE    | not DE       |
| not DE    | not DE       | not DE    | not DE    | not DE | not DE | not DE    | not DE       |
| not DE    | not DE       | not DE    | not DE    | not DE | not DE | not DE    | not DE       |
| not DE    | not DE       | not DE    | not DE    | not DE | not DE | not DE    | not DE       |
| not DE    | not DE       | not DE    | not DE    | not DE | not DE | not DE    | not DE       |
| -1. 84877 | 8. 26E-05    | not DE    | not DE    | not DE | not DE | not DE    | not DE       |
| not DE    | not DE       | not DE    | not DE    | not DE | not DE | not DE    | not DE       |
| not DE    | not DE       | not DE    | not DE    | not DE | not DE | not DE    | not DE       |
| not DE    | not DE       | not DE    | not DE    | not DE | not DE | not DE    | not DE       |
| not DE    | not DE       | not DE    | not DE    | not DE | not DE | not DE    | not DE       |
| not DE    | not DE       | not DE    | not DE    | not DE | not DE | not DE    | not DE       |
| not DE    | not DE       | not DE    | not DE    | not DE | not DE | not DE    | not DE       |
| not DE    | not DE       | not DE    | not DE    | not DE | not DE | not DE    | not DE       |
| not DE    | not DE       | not DE    | not DE    | not DE | not DE | not DE    | not DE       |
| not DE    | not DE       | not DE    | not DE    | not DE | not DE | not DE    | not DE       |
| not DE    | not DE       | not DE    | not DE    | not DE | not DE | not DE    | not DE       |
| not DE    | not DE       | not DE    | not DE    | not DE | not DE | 1. 392409 | 0. 000289657 |
| 1. 034143 | 0. 01321378  | not DE    | not DE    | not DE | not DE | 1. 819526 | 1. 45E-05    |
| not DE    | not DE       | not DE    | not DE    | not DE | not DE | not DE    | not DE       |
| 1. 000263 | 0. 004978766 | not DE    | not DE    | not DE | not DE | not DE    | not DE       |

|          |             |          |          |          |          |          |             |
|----------|-------------|----------|----------|----------|----------|----------|-------------|
| not DE   | not DE      | not DE   | not DE   | not DE   | not DE   | not DE   | not DE      |
| not DE   | not DE      | not DE   | not DE   | not DE   | not DE   | not DE   | not DE      |
| not DE   | not DE      | not DE   | not DE   | not DE   | not DE   | not DE   | not DE      |
| not DE   | not DE      | not DE   | not DE   | not DE   | not DE   | not DE   | not DE      |
| not DE   | not DE      | not DE   | not DE   | not DE   | not DE   | not DE   | not DE      |
| not DE   | not DE      | not DE   | not DE   | not DE   | not DE   | -1.44192 | 0.000701895 |
| 2.031921 | 7.53E-06    | 2.559626 | 0.005458 | not DE   | not DE   | 2.594237 | 6.82E-06    |
| not DE   | not DE      | not DE   | not DE   | not DE   | not DE   | 1.609331 | 0.00503132  |
| -1.28741 | 0.003909784 | not DE   | not DE   | not DE   | not DE   | not DE   | not DE      |
| not DE   | not DE      | 2.459805 | 0.027989 | not DE   | not DE   | not DE   | not DE      |
| not DE   | not DE      | not DE   | not DE   | not DE   | not DE   | not DE   | not DE      |
| 1.679748 | 3.98E-12    | 1.508324 | 0.045401 | not DE   | not DE   | 2.599279 | 3.63E-24    |
| not DE   | not DE      | not DE   | not DE   | not DE   | not DE   | not DE   | not DE      |
| not DE   | not DE      | not DE   | not DE   | not DE   | not DE   | -1.42769 | 9.94E-05    |
| not DE   | not DE      | not DE   | not DE   | not DE   | not DE   | not DE   | not DE      |
| not DE   | not DE      | not DE   | not DE   | not DE   | not DE   | 2.49998  | 0.033188759 |
| not DE   | not DE      | not DE   | not DE   | not DE   | not DE   | -1.41977 | 0.0082448   |
| -1.98655 | 3.77E-07    | not DE   | not DE   | not DE   | not DE   | -2.22083 | 2.01E-08    |
| not DE   | not DE      | not DE   | not DE   | not DE   | not DE   | not DE   | not DE      |
| not DE   | not DE      | not DE   | not DE   | not DE   | not DE   | not DE   | not DE      |
| not DE   | not DE      | not DE   | not DE   | not DE   | not DE   | 1.71858  | 0.000189047 |
| not DE   | not DE      | not DE   | not DE   | not DE   | not DE   | -1.70127 | 0.046326062 |
| not DE   | not DE      | not DE   | not DE   | not DE   | not DE   | not DE   | not DE      |
| not DE   | not DE      | not DE   | not DE   | not DE   | not DE   | not DE   | not DE      |
| not DE   | not DE      | 6.999453 | 2.98E-07 | not DE   | not DE   | not DE   | not DE      |
| not DE   | not DE      | not DE   | not DE   | not DE   | not DE   | not DE   | not DE      |
| not DE   | not DE      | not DE   | not DE   | not DE   | not DE   | 1.43447  | 7.27E-05    |
| not DE   | not DE      | not DE   | not DE   | not DE   | not DE   | not DE   | not DE      |
| not DE   | not DE      | not DE   | not DE   | not DE   | not DE   | not DE   | not DE      |
| not DE   | not DE      | not DE   | not DE   | not DE   | not DE   | not DE   | not DE      |
| not DE   | not DE      | not DE   | not DE   | not DE   | not DE   | not DE   | not DE      |
| not DE   | not DE      | not DE   | not DE   | not DE   | not DE   | not DE   | not DE      |
| not DE   | not DE      | not DE   | not DE   | not DE   | not DE   | not DE   | not DE      |
| not DE   | not DE      | not DE   | not DE   | not DE   | not DE   | not DE   | not DE      |
| not DE   | not DE      | not DE   | not DE   | not DE   | not DE   | not DE   | not DE      |
| -2.614   | 0.000215971 | not DE   | not DE   | 1.062651 | 0.035029 | -4.79457 | 8.51E-08    |
| not DE   | not DE      | not DE   | not DE   | not DE   | not DE   | -4.72681 | 2.02E-06    |
| not DE   | not DE      | not DE   | not DE   | not DE   | not DE   | not DE   | not DE      |
| not DE   | not DE      | not DE   | not DE   | not DE   | not DE   | not DE   | not DE      |
| not DE   | not DE      | not DE   | not DE   | not DE   | not DE   | not DE   | not DE      |
| not DE   | not DE      | not DE   | not DE   | not DE   | not DE   | not DE   | not DE      |
| not DE   | not DE      | 1.343695 | 0.001788 | not DE   | not DE   | not DE   | not DE      |
| not DE   | not DE      | not DE   | not DE   | not DE   | not DE   | not DE   | not DE      |
| not DE   | not DE      | not DE   | not DE   | not DE   | not DE   | not DE   | not DE      |
| not DE   | not DE      | not DE   | not DE   | not DE   | not DE   | not DE   | not DE      |
| not DE   | not DE      | not DE   | not DE   | not DE   | not DE   | not DE   | not DE      |
| not DE   | not DE      | not DE   | not DE   | not DE   | not DE   | not DE   | not DE      |
| -1.13292 | 0.009699896 | not DE   | not DE   | not DE   | not DE   | -2.07233 | 4.99E-05    |
| not DE   | not DE      | not DE   | not DE   | not DE   | not DE   | -2.35938 | 1.05E-05    |
| not DE   | not DE      | not DE   | not DE   | not DE   | not DE   | not DE   | not DE      |
| not DE   | not DE      | not DE   | not DE   | not DE   | not DE   | not DE   | not DE      |
| not DE   | not DE      | not DE   | not DE   | not DE   | not DE   | -3.43453 | 0.007065493 |
| not DE   | not DE      | not DE   | not DE   | not DE   | not DE   | not DE   | not DE      |
| not DE   | not DE      | not DE   | not DE   | not DE   | not DE   | not DE   | not DE      |
| not DE   | not DE      | not DE   | not DE   | not DE   | not DE   | not DE   | not DE      |
| not DE   | not DE      | not DE   | not DE   | not DE   | not DE   | -1.17608 | 0.026812049 |



















|          |             |          |          |        |        |          |             |
|----------|-------------|----------|----------|--------|--------|----------|-------------|
| not DE   | not DE      | not DE   | not DE   | not DE | not DE | not DE   | not DE      |
| not DE   | not DE      | not DE   | not DE   | not DE | not DE | not DE   | not DE      |
| not DE   | not DE      | not DE   | not DE   | not DE | not DE | not DE   | not DE      |
| -1.7764  | 0.013072256 | not DE   | not DE   | not DE | not DE | -2.21863 | 0.003201934 |
| not DE   | not DE      | not DE   | not DE   | not DE | not DE | not DE   | not DE      |
| -1.69021 | 0.000649784 | not DE   | not DE   | not DE | not DE | -1.93003 | 1.33E-05    |
| not DE   | not DE      | not DE   | not DE   | not DE | not DE | not DE   | not DE      |
| not DE   | not DE      | not DE   | not DE   | not DE | not DE | not DE   | not DE      |
| not DE   | not DE      | not DE   | not DE   | not DE | not DE | not DE   | not DE      |
| not DE   | not DE      | not DE   | not DE   | not DE | not DE | 1.188148 | 0.033009495 |
| not DE   | not DE      | not DE   | not DE   | not DE | not DE | not DE   | not DE      |
| 2.96783  | 3.64E-06    | 2.653523 | 0.042847 | not DE | not DE | 3.511394 | 4.15E-09    |
| not DE   | not DE      | not DE   | not DE   | not DE | not DE | not DE   | not DE      |
| not DE   | not DE      | not DE   | not DE   | not DE | not DE | not DE   | not DE      |
| -1.57606 | 1.62E-06    | not DE   | not DE   | not DE | not DE | -2.00603 | 2.00E-05    |
| not DE   | not DE      | not DE   | not DE   | not DE | not DE | not DE   | not DE      |
| not DE   | not DE      | not DE   | not DE   | not DE | not DE | not DE   | not DE      |
| not DE   | not DE      | not DE   | not DE   | not DE | not DE | not DE   | not DE      |
| not DE   | not DE      | not DE   | not DE   | not DE | not DE | -1.10323 | 0.001149892 |
| not DE   | not DE      | not DE   | not DE   | not DE | not DE | not DE   | not DE      |
| not DE   | not DE      | not DE   | not DE   | not DE | not DE | not DE   | not DE      |
| not DE   | not DE      | not DE   | not DE   | not DE | not DE | -2.01094 | 0.031737621 |
| not DE   | not DE      | not DE   | not DE   | not DE | not DE | not DE   | not DE      |
| not DE   | not DE      | not DE   | not DE   | not DE | not DE | -2.20216 | 1.02E-09    |
| not DE   | not DE      | not DE   | not DE   | not DE | not DE | -2.69387 | 0.039282595 |
| not DE   | not DE      | not DE   | not DE   | not DE | not DE | not DE   | not DE      |
| not DE   | not DE      | not DE   | not DE   | not DE | not DE | not DE   | not DE      |
| not DE   | not DE      | not DE   | not DE   | not DE | not DE | not DE   | not DE      |
| not DE   | not DE      | not DE   | not DE   | not DE | not DE | not DE   | not DE      |
| not DE   | not DE      | not DE   | not DE   | not DE | not DE | not DE   | not DE      |
| not DE   | not DE      | not DE   | not DE   | not DE | not DE | not DE   | not DE      |
| not DE   | not DE      | not DE   | not DE   | not DE | not DE | not DE   | not DE      |
| 1.15847  | 0.040294557 | not DE   | not DE   | not DE | not DE | 1.816621 | 4.29E-05    |
| not DE   | not DE      | not DE   | not DE   | not DE | not DE | not DE   | not DE      |
| not DE   | not DE      | not DE   | not DE   | not DE | not DE | not DE   | not DE      |
| not DE   | not DE      | not DE   | not DE   | not DE | not DE | -1.87565 | 1.33E-06    |
| 1.185692 | 3.86E-07    | not DE   | not DE   | not DE | not DE | 1.718491 | 1.91E-09    |
| not DE   | not DE      | not DE   | not DE   | not DE | not DE | not DE   | not DE      |
| -1.0227  | 0.017426601 | not DE   | not DE   | not DE | not DE | not DE   | not DE      |
| not DE   | not DE      | 1.470088 | 0.047659 | not DE | not DE | 2.015534 | 0.001982242 |
| not DE   | not DE      | not DE   | not DE   | not DE | not DE | not DE   | not DE      |
| not DE   | not DE      | not DE   | not DE   | not DE | not DE | not DE   | not DE      |
| not DE   | not DE      | not DE   | not DE   | not DE | not DE | not DE   | not DE      |
| not DE   | not DE      | not DE   | not DE   | not DE | not DE | not DE   | not DE      |
| not DE   | not DE      | not DE   | not DE   | not DE | not DE | not DE   | not DE      |
| not DE   | not DE      | not DE   | not DE   | not DE | not DE | not DE   | not DE      |
| not DE   | not DE      | not DE   | not DE   | not DE | not DE | not DE   | not DE      |
| not DE   | not DE      | not DE   | not DE   | not DE | not DE | not DE   | not DE      |
| 1.381591 | 0.01576054  | not DE   | not DE   | not DE | not DE | not DE   | not DE      |
| not DE   | not DE      | not DE   | not DE   | not DE | not DE | -3.03588 | 1.72E-08    |
| not DE   | not DE      | not DE   | not DE   | not DE | not DE | not DE   | not DE      |
| 1.332654 | 0.00227913  | not DE   | not DE   | not DE | not DE | 2.075285 | 1.89E-07    |
| 1.013216 | 0.012127156 | 4.250023 | 0.000224 | not DE | not DE | 2.368804 | 6.52E-12    |
| -1.08934 | 0.035808556 | not DE   | not DE   | not DE | not DE | -2.9481  | 4.74E-13    |

































|          |             |          |          |          |          |          |             |
|----------|-------------|----------|----------|----------|----------|----------|-------------|
| not DE   | not DE      | not DE   | not DE   | not DE   | not DE   | not DE   | not DE      |
| not DE   | not DE      | not DE   | not DE   | not DE   | not DE   | -1.06918 | 0.017854297 |
| not DE   | not DE      | not DE   | not DE   | not DE   | not DE   | not DE   | not DE      |
| not DE   | not DE      | not DE   | not DE   | not DE   | not DE   | not DE   | not DE      |
| not DE   | not DE      | not DE   | not DE   | not DE   | not DE   | not DE   | not DE      |
| not DE   | not DE      | not DE   | not DE   | not DE   | not DE   | not DE   | not DE      |
| 1.645041 | 0.012619765 | 1.511133 | 0.005491 | 1.179065 | 0.015553 | 2.057381 | 0.00124572  |
| 3.3056   | 3.03E-06    | not DE   | not DE   | not DE   | not DE   | 2.165526 | 0.005613358 |
| not DE   | not DE      | not DE   | not DE   | not DE   | not DE   | not DE   | not DE      |
| not DE   | not DE      | not DE   | not DE   | not DE   | not DE   | not DE   | not DE      |
| not DE   | not DE      | not DE   | not DE   | not DE   | not DE   | not DE   | not DE      |
| not DE   | not DE      | not DE   | not DE   | not DE   | not DE   | not DE   | not DE      |
| not DE   | not DE      | not DE   | not DE   | not DE   | not DE   | not DE   | not DE      |
| not DE   | not DE      | not DE   | not DE   | not DE   | not DE   | not DE   | not DE      |
| not DE   | not DE      | not DE   | not DE   | not DE   | not DE   | not DE   | not DE      |
| not DE   | not DE      | not DE   | not DE   | not DE   | not DE   | not DE   | not DE      |
| not DE   | not DE      | not DE   | not DE   | not DE   | not DE   | -1.65121 | 0.004892163 |
| not DE   | not DE      | not DE   | not DE   | not DE   | not DE   | not DE   | not DE      |
| not DE   | not DE      | not DE   | not DE   | not DE   | not DE   | not DE   | not DE      |
| not DE   | not DE      | not DE   | not DE   | not DE   | not DE   | not DE   | not DE      |
| not DE   | not DE      | not DE   | not DE   | not DE   | not DE   | not DE   | not DE      |
| not DE   | not DE      | not DE   | not DE   | not DE   | not DE   | not DE   | not DE      |
| not DE   | not DE      | not DE   | not DE   | not DE   | not DE   | not DE   | not DE      |
| not DE   | not DE      | not DE   | not DE   | not DE   | not DE   | not DE   | not DE      |
| not DE   | not DE      | not DE   | not DE   | not DE   | not DE   | not DE   | not DE      |
| -5.65803 | 1.07E-19    | -2.65099 | 1.52E-05 | -4.22212 | 1.44E-14 | -7.62145 | 6.35E-65    |
| not DE   | not DE      | not DE   | not DE   | not DE   | not DE   | not DE   | not DE      |
| not DE   | not DE      | not DE   | not DE   | not DE   | not DE   | not DE   | not DE      |
| not DE   | not DE      | not DE   | not DE   | not DE   | not DE   | not DE   | not DE      |
| not DE   | not DE      | -1.73181 | 0.008253 | not DE   | not DE   | not DE   | not DE      |
| 4.296673 | 0.002518382 | 3.471891 | 0.02575  | 3.350837 | 0.001846 | 3.798629 | 0.006035888 |
| not DE   | not DE      | not DE   | not DE   | not DE   | not DE   | 1.15562  | 0.003944836 |
| not DE   | not DE      | not DE   | not DE   | not DE   | not DE   | not DE   | not DE      |
| not DE   | not DE      | not DE   | not DE   | 2.002672 | 0.024475 | not DE   | not DE      |
| -2.14629 | 2.67E-05    | not DE   | not DE   | not DE   | not DE   | -4.34054 | 2.01E-08    |
| -1.40963 | 1.22E-08    | not DE   | not DE   | not DE   | not DE   | -1.62523 | 1.63E-06    |
| not DE   | not DE      | not DE   | not DE   | not DE   | not DE   | not DE   | not DE      |
| 5.100733 | 3.36E-38    | 4.140271 | 3.27E-05 | not DE   | not DE   | 6.925668 | 3.63E-43    |
| not DE   | not DE      | not DE   | not DE   | not DE   | not DE   | not DE   | not DE      |
| not DE   | not DE      | not DE   | not DE   | not DE   | not DE   | not DE   | not DE      |
| not DE   | not DE      | not DE   | not DE   | not DE   | not DE   | not DE   | not DE      |
| not DE   | not DE      | not DE   | not DE   | not DE   | not DE   | not DE   | not DE      |
| not DE   | not DE      | not DE   | not DE   | not DE   | not DE   | not DE   | not DE      |
| not DE   | not DE      | not DE   | not DE   | not DE   | not DE   | not DE   | not DE      |
| not DE   | not DE      | not DE   | not DE   | not DE   | not DE   | not DE   | not DE      |
| -1.75963 | 0.040539913 | not DE   | not DE   | not DE   | not DE   | -2.38458 | 0.000363339 |
| not DE   | not DE      | not DE   | not DE   | not DE   | not DE   | not DE   | not DE      |
| not DE   | not DE      | not DE   | not DE   | not DE   | not DE   | not DE   | not DE      |
| not DE   | not DE      | not DE   | not DE   | not DE   | not DE   | not DE   | not DE      |
| not DE   | not DE      | not DE   | not DE   | not DE   | not DE   | not DE   | not DE      |
| not DE   | not DE      | not DE   | not DE   | not DE   | not DE   | not DE   | not DE      |
| not DE   | not DE      | not DE   | not DE   | not DE   | not DE   | not DE   | not DE      |
| not DE   | not DE      | not DE   | not DE   | not DE   | not DE   | not DE   | not DE      |
| not DE   | not DE      | not DE   | not DE   | not DE   | not DE   | not DE   | not DE      |
| not DE   | not DE      | not DE   | not DE   | not DE   | not DE   | 2.617855 | 0.001782456 |





















|           |              |           |           |           |           |           |              |
|-----------|--------------|-----------|-----------|-----------|-----------|-----------|--------------|
| not DE    | not DE       | not DE    | not DE    | not DE    | not DE    | not DE    | not DE       |
| not DE    | not DE       | not DE    | not DE    | not DE    | not DE    | not DE    | not DE       |
| not DE    | not DE       | not DE    | not DE    | not DE    | not DE    | not DE    | not DE       |
| not DE    | not DE       | not DE    | not DE    | not DE    | not DE    | not DE    | not DE       |
| not DE    | not DE       | not DE    | not DE    | not DE    | not DE    | not DE    | not DE       |
| not DE    | not DE       | 4. 301523 | 6. 20E-06 | not DE    | not DE    | 2. 007961 | 0. 000242519 |
| not DE    | not DE       | not DE    | not DE    | not DE    | not DE    | not DE    | not DE       |
| not DE    | not DE       | not DE    | not DE    | not DE    | not DE    | not DE    | not DE       |
| not DE    | not DE       | not DE    | not DE    | not DE    | not DE    | -1. 00225 | 0. 000376053 |
| not DE    | not DE       | not DE    | not DE    | 1. 218901 | 0. 010155 | not DE    | not DE       |
| not DE    | not DE       | not DE    | not DE    | not DE    | not DE    | not DE    | not DE       |
| -1. 2199  | 7. 88E-08    | not DE    | not DE    | not DE    | not DE    | not DE    | not DE       |
| not DE    | not DE       | not DE    | not DE    | not DE    | not DE    | not DE    | not DE       |
| not DE    | not DE       | not DE    | not DE    | not DE    | not DE    | not DE    | not DE       |
| 2. 18522  | 3. 52E-24    | 1. 124012 | 2. 97E-05 | not DE    | not DE    | 3. 152301 | 1. 07E-24    |
| not DE    | not DE       | not DE    | not DE    | not DE    | not DE    | not DE    | not DE       |
| not DE    | not DE       | not DE    | not DE    | not DE    | not DE    | not DE    | not DE       |
| -2. 53499 | 0. 027732191 | not DE    | not DE    | not DE    | not DE    | not DE    | not DE       |
| not DE    | not DE       | not DE    | not DE    | not DE    | not DE    | not DE    | not DE       |
| not DE    | not DE       | not DE    | not DE    | not DE    | not DE    | not DE    | not DE       |
| not DE    | not DE       | not DE    | not DE    | not DE    | not DE    | not DE    | not DE       |
| not DE    | not DE       | not DE    | not DE    | not DE    | not DE    | not DE    | not DE       |
| not DE    | not DE       | not DE    | not DE    | not DE    | not DE    | not DE    | not DE       |
| not DE    | not DE       | not DE    | not DE    | not DE    | not DE    | -2. 77714 | 0. 001116937 |
| not DE    | not DE       | not DE    | not DE    | not DE    | not DE    | not DE    | not DE       |
| not DE    | not DE       | not DE    | not DE    | not DE    | not DE    | not DE    | not DE       |
| not DE    | not DE       | not DE    | not DE    | not DE    | not DE    | not DE    | not DE       |
| -1. 30799 | 0. 000581744 | not DE    | not DE    | not DE    | not DE    | not DE    | not DE       |
| not DE    | not DE       | not DE    | not DE    | not DE    | not DE    | not DE    | not DE       |
| not DE    | not DE       | not DE    | not DE    | not DE    | not DE    | not DE    | not DE       |
| 1. 652688 | 0. 001906433 | not DE    | not DE    | -1. 32328 | 0. 018618 | 2. 012952 | 0. 005492879 |
| 1. 090539 | 0. 022585994 | not DE    | not DE    | not DE    | not DE    | 1. 834466 | 0. 00018521  |
| -1. 2338  | 0. 000360575 | not DE    | not DE    | not DE    | not DE    | not DE    | not DE       |
| not DE    | not DE       | not DE    | not DE    | not DE    | not DE    | not DE    | not DE       |
| not DE    | not DE       | -1. 22814 | 8. 91E-05 | -1. 09831 | 3. 47E-05 | not DE    | not DE       |
| not DE    | not DE       | not DE    | not DE    | not DE    | not DE    | not DE    | not DE       |
| not DE    | not DE       | not DE    | not DE    | not DE    | not DE    | not DE    | not DE       |
| not DE    | not DE       | not DE    | not DE    | not DE    | not DE    | not DE    | not DE       |
| not DE    | not DE       | not DE    | not DE    | not DE    | not DE    | not DE    | not DE       |
| not DE    | not DE       | not DE    | not DE    | not DE    | not DE    | not DE    | not DE       |
| not DE    | not DE       | not DE    | not DE    | not DE    | not DE    | not DE    | not DE       |
| not DE    | not DE       | not DE    | not DE    | not DE    | not DE    | not DE    | not DE       |
| not DE    | not DE       | not DE    | not DE    | not DE    | not DE    | not DE    | not DE       |
| not DE    | not DE       | not DE    | not DE    | not DE    | not DE    | not DE    | not DE       |
| not DE    | not DE       | not DE    | not DE    | not DE    | not DE    | not DE    | not DE       |
| not DE    | not DE       | not DE    | not DE    | not DE    | not DE    | not DE    | not DE       |
| not DE    | not DE       | not DE    | not DE    | not DE    | not DE    | not DE    | not DE       |
| not DE    | not DE       | not DE    | not DE    | not DE    | not DE    | not DE    | not DE       |
| not DE    | not DE       | not DE    | not DE    | not DE    | not DE    | not DE    | not DE       |
| not DE    | not DE       | not DE    | not DE    | not DE    | not DE    | not DE    | not DE       |
| not DE    | not DE       | not DE    | not DE    | not DE    | not DE    | not DE    | not DE       |
| 1. 905753 | 4. 84E-09    | not DE    | not DE    | not DE    | not DE    | not DE    | not DE       |
| not DE    | not DE       | not DE    | not DE    | 1. 00326  | 0. 035283 | not DE    | not DE       |

























|                      |                   |        |                   |        |                      |
|----------------------|-------------------|--------|-------------------|--------|----------------------|
| -1.42016 0.00417689  | not DE            | not DE | not DE            | not DE | -2.11517 0.014691219 |
| not DE not DE        | not DE            | not DE | not DE            | not DE | not DE not DE        |
| not DE not DE        | -3.63335 0.000192 | not DE | not DE            | not DE | -1.88266 0.001908328 |
| 1.634709 7.70E-08    | not DE            | not DE | not DE            | not DE | 1.78357 1.46E-06     |
| not DE not DE        | not DE            | not DE | not DE            | not DE | not DE not DE        |
| not DE not DE        | not DE            | not DE | not DE            | not DE | not DE not DE        |
| not DE not DE        | not DE            | not DE | not DE            | not DE | not DE not DE        |
| not DE not DE        | not DE            | not DE | not DE            | not DE | not DE not DE        |
| not DE not DE        | not DE            | not DE | not DE            | not DE | not DE not DE        |
| not DE not DE        | not DE            | not DE | not DE            | not DE | not DE not DE        |
| not DE not DE        | not DE            | not DE | not DE            | not DE | not DE not DE        |
| not DE not DE        | not DE            | not DE | not DE            | not DE | not DE not DE        |
| not DE not DE        | 8.708283 0.000536 | not DE | not DE            | not DE | not DE not DE        |
| not DE not DE        | not DE            | not DE | not DE            | not DE | not DE not DE        |
| not DE not DE        | not DE            | not DE | not DE            | not DE | -1.01022 0.00894598  |
| not DE not DE        | not DE            | not DE | not DE            | not DE | not DE not DE        |
| not DE not DE        | not DE            | not DE | not DE            | not DE | not DE not DE        |
| not DE not DE        | not DE            | not DE | not DE            | not DE | not DE not DE        |
| 2.229834 0.022258169 | not DE            | not DE | not DE            | not DE | 2.568791 1.15E-05    |
| not DE not DE        | not DE            | not DE | not DE            | not DE | not DE not DE        |
| not DE not DE        | not DE            | not DE | not DE            | not DE | not DE not DE        |
| not DE not DE        | not DE            | not DE | not DE            | not DE | not DE not DE        |
| not DE not DE        | not DE            | not DE | not DE            | not DE | not DE not DE        |
| not DE not DE        | not DE            | not DE | not DE            | not DE | not DE not DE        |
| -2.27315 0.027300541 | -3.28999 0.005827 | not DE | not DE            | not DE | not DE not DE        |
| not DE not DE        | not DE            | not DE | not DE            | not DE | not DE not DE        |
| not DE not DE        | not DE            | not DE | not DE            | not DE | not DE not DE        |
| -1.22721 0.041582399 | not DE            | not DE | not DE            | not DE | -2.73022 3.79E-05    |
| 1.093175 0.000139386 | not DE            | not DE | not DE            | not DE | 1.033538 0.041743849 |
| 2.222862 2.44E-13    | not DE            | not DE | not DE            | not DE | 2.67307 1.72E-10     |
| not DE not DE        | not DE            | not DE | not DE            | not DE | not DE not DE        |
| not DE not DE        | not DE            | not DE | not DE            | not DE | not DE not DE        |
| not DE not DE        | not DE            | not DE | not DE            | not DE | not DE not DE        |
| not DE not DE        | not DE            | not DE | not DE            | not DE | not DE not DE        |
| not DE not DE        | not DE            | not DE | not DE            | not DE | not DE not DE        |
| not DE not DE        | not DE            | not DE | not DE            | not DE | not DE not DE        |
| not DE not DE        | not DE            | not DE | not DE            | not DE | not DE not DE        |
| -1.49014 0.014927606 | not DE            | not DE | -1.51493 0.000341 | not DE | not DE not DE        |
| not DE not DE        | not DE            | not DE | not DE            | not DE | not DE not DE        |
| not DE not DE        | not DE            | not DE | not DE            | not DE | not DE not DE        |
| not DE not DE        | not DE            | not DE | not DE            | not DE | not DE not DE        |
| not DE not DE        | not DE            | not DE | not DE            | not DE | not DE not DE        |
| not DE not DE        | not DE            | not DE | not DE            | not DE | not DE not DE        |
| not DE not DE        | not DE            | not DE | not DE            | not DE | not DE not DE        |
| not DE not DE        | not DE            | not DE | not DE            | not DE | not DE not DE        |
| not DE not DE        | not DE            | not DE | not DE            | not DE | not DE not DE        |
| not DE not DE        | not DE            | not DE | not DE            | not DE | not DE not DE        |
| not DE not DE        | not DE            | not DE | not DE            | not DE | not DE not DE        |
| not DE not DE        | not DE            | not DE | not DE            | not DE | not DE not DE        |
| not DE not DE        | not DE            | not DE | not DE            | not DE | not DE not DE        |
| not DE not DE        | not DE            | not DE | not DE            | not DE | not DE not DE        |
| not DE not DE        | not DE            | not DE | not DE            | not DE | not DE not DE        |
| not DE not DE        | not DE            | not DE | not DE            | not DE | not DE not DE        |
| -1.45092 0.014982875 | not DE            | not DE | not DE            | not DE | 1.241842 0.000614562 |
| not DE not DE        | not DE            | not DE | not DE            | not DE | not DE not DE        |
| not DE not DE        | not DE            | not DE | not DE            | not DE | not DE not DE        |
| not DE not DE        | not DE            | not DE | not DE            | not DE | not DE not DE        |







|          |             |          |          |          |          |          |             |
|----------|-------------|----------|----------|----------|----------|----------|-------------|
| not DE   | not DE      | not DE   | not DE   | not DE   | not DE   | not DE   | not DE      |
| not DE   | not DE      | not DE   | not DE   | not DE   | not DE   | not DE   | not DE      |
| -1.28028 | 0.007801789 | not DE   | not DE   | not DE   | not DE   | not DE   | not DE      |
| not DE   | not DE      | not DE   | not DE   | not DE   | not DE   | not DE   | not DE      |
| not DE   | not DE      | not DE   | not DE   | not DE   | not DE   | not DE   | not DE      |
| not DE   | not DE      | not DE   | not DE   | not DE   | not DE   | not DE   | not DE      |
| not DE   | not DE      | not DE   | not DE   | not DE   | not DE   | not DE   | not DE      |
| not DE   | not DE      | not DE   | not DE   | -1.03929 | 0.026077 | not DE   | not DE      |
| not DE   | not DE      | not DE   | not DE   | not DE   | not DE   | not DE   | not DE      |
| not DE   | not DE      | -1.2603  | 0.041183 | not DE   | not DE   | not DE   | not DE      |
| not DE   | not DE      | not DE   | not DE   | not DE   | not DE   | not DE   | not DE      |
| not DE   | not DE      | not DE   | not DE   | not DE   | not DE   | not DE   | not DE      |
| not DE   | not DE      | not DE   | not DE   | not DE   | not DE   | not DE   | not DE      |
| not DE   | not DE      | 4.692995 | 5.17E-05 | not DE   | not DE   | 2.843774 | 3.02E-07    |
| -1.16117 | 0.000193602 | not DE   | not DE   | not DE   | not DE   | -1.68415 | 0.001986993 |
| not DE   | not DE      | not DE   | not DE   | not DE   | not DE   | not DE   | not DE      |
| not DE   | not DE      | not DE   | not DE   | not DE   | not DE   | not DE   | not DE      |
| not DE   | not DE      | not DE   | not DE   | not DE   | not DE   | not DE   | not DE      |
| not DE   | not DE      | not DE   | not DE   | not DE   | not DE   | 1.0134   | 1.47E-06    |
| not DE   | not DE      | not DE   | not DE   | not DE   | not DE   | -1.28092 | 0.003830969 |
| not DE   | not DE      | not DE   | not DE   | not DE   | not DE   | not DE   | not DE      |
| not DE   | not DE      | not DE   | not DE   | not DE   | not DE   | not DE   | not DE      |
| not DE   | not DE      | not DE   | not DE   | not DE   | not DE   | not DE   | not DE      |
| not DE   | not DE      | not DE   | not DE   | not DE   | not DE   | not DE   | not DE      |
| not DE   | not DE      | not DE   | not DE   | not DE   | not DE   | not DE   | not DE      |
| not DE   | not DE      | not DE   | not DE   | not DE   | not DE   | not DE   | not DE      |
| not DE   | not DE      | not DE   | not DE   | not DE   | not DE   | not DE   | not DE      |
| not DE   | not DE      | not DE   | not DE   | not DE   | not DE   | not DE   | not DE      |
| not DE   | not DE      | not DE   | not DE   | not DE   | not DE   | not DE   | not DE      |
| not DE   | not DE      | not DE   | not DE   | not DE   | not DE   | not DE   | not DE      |
| not DE   | not DE      | not DE   | not DE   | not DE   | not DE   | not DE   | not DE      |
| not DE   | not DE      | not DE   | not DE   | not DE   | not DE   | not DE   | not DE      |
| not DE   | not DE      | not DE   | not DE   | not DE   | not DE   | not DE   | not DE      |
| not DE   | not DE      | not DE   | not DE   | not DE   | not DE   | not DE   | not DE      |
| not DE   | not DE      | not DE   | not DE   | not DE   | not DE   | not DE   | not DE      |
| not DE   | not DE      | not DE   | not DE   | not DE   | not DE   | not DE   | not DE      |
| not DE   | not DE      | not DE   | not DE   | not DE   | not DE   | not DE   | not DE      |
| not DE   | not DE      | not DE   | not DE   | not DE   | not DE   | not DE   | not DE      |
| not DE   | not DE      | -1.45309 | 0.010756 | not DE   | not DE   | not DE   | not DE      |
| not DE   | not DE      | not DE   | not DE   | not DE   | not DE   | -1.00116 | 0.040288107 |
| not DE   | not DE      | not DE   | not DE   | not DE   | not DE   | 1.308307 | 0.000800329 |
| not DE   | not DE      | not DE   | not DE   | not DE   | not DE   | not DE   | not DE      |
| not DE   | not DE      | not DE   | not DE   | not DE   | not DE   | not DE   | not DE      |
| not DE   | not DE      | not DE   | not DE   | not DE   | not DE   | not DE   | not DE      |
| not DE   | not DE      | -2.83532 | 0.02575  | not DE   | not DE   | not DE   | not DE      |
| not DE   | not DE      | not DE   | not DE   | not DE   | not DE   | not DE   | not DE      |
| -1.04416 | 0.033702832 | not DE   | not DE   | not DE   | not DE   | -2.42866 | 2.61E-07    |
| -3.59    | 1.55E-26    | -2.03105 | 4.16E-10 | -1.78626 | 4.88E-09 | -4.10207 | 1.79E-54    |
| 1.336952 | 0.002860875 | not DE   | not DE   | not DE   | not DE   | 1.934997 | 0.000151188 |
| not DE   | not DE      | not DE   | not DE   | not DE   | not DE   | -1.94879 | 0.000571589 |
| not DE   | not DE      | not DE   | not DE   | not DE   | not DE   | not DE   | not DE      |
| not DE   | not DE      | not DE   | not DE   | not DE   | not DE   | not DE   | not DE      |
| not DE   | not DE      | not DE   | not DE   | not DE   | not DE   | not DE   | not DE      |
| not DE   | not DE      | not DE   | not DE   | not DE   | not DE   | not DE   | not DE      |
| not DE   | not DE      | not DE   | not DE   | not DE   | not DE   | not DE   | not DE      |
| -1.16217 | 0.036030546 | not DE   | not DE   | -1.01628 | 0.028056 | -1.07779 | 0.014933479 |
| not DE   | not DE      | not DE   | not DE   | not DE   | not DE   | not DE   | not DE      |
| not DE   | not DE      | not DE   | not DE   | not DE   | not DE   | -1.23496 | 0.000589363 |
| not DE   | not DE      | not DE   | not DE   | not DE   | not DE   | not DE   | not DE      |
| not DE   | not DE      | not DE   | not DE   | 1.965753 | 0.041666 | not DE   | not DE      |











|          |             |          |          |          |          |          |             |
|----------|-------------|----------|----------|----------|----------|----------|-------------|
| not DE   | not DE      | not DE   | not DE   | not DE   | not DE   | -1.05238 | 0.002682697 |
| not DE   | not DE      | not DE   | not DE   | not DE   | not DE   | not DE   | not DE      |
| -4.04515 | 0.012413692 | not DE   | not DE   | not DE   | not DE   | -5.53728 | 2.50E-05    |
| -4.36421 | 9.10E-44    | -2.92477 | 1.60E-09 | -2.76042 | 1.26E-07 | -5.23371 | 1.69E-53    |
| not DE   | not DE      | not DE   | not DE   | not DE   | not DE   | not DE   | not DE      |
| not DE   | not DE      | not DE   | not DE   | not DE   | not DE   | not DE   | not DE      |
| not DE   | not DE      | not DE   | not DE   | not DE   | not DE   | not DE   | not DE      |
| not DE   | not DE      | not DE   | not DE   | not DE   | not DE   | not DE   | not DE      |
| not DE   | not DE      | not DE   | not DE   | not DE   | not DE   | not DE   | not DE      |
| not DE   | not DE      | not DE   | not DE   | not DE   | not DE   | not DE   | not DE      |
| not DE   | not DE      | not DE   | not DE   | not DE   | not DE   | not DE   | not DE      |
| not DE   | not DE      | not DE   | not DE   | -1.57803 | 0.013298 | -3.75849 | 0.000100292 |
| not DE   | not DE      | not DE   | not DE   | not DE   | not DE   | not DE   | not DE      |
| not DE   | not DE      | not DE   | not DE   | not DE   | not DE   | not DE   | not DE      |
| not DE   | not DE      | not DE   | not DE   | not DE   | not DE   | not DE   | not DE      |
| 1.455591 | 0.008305575 | not DE   | not DE   | not DE   | not DE   | 1.322207 | 0.023752237 |
| not DE   | not DE      | not DE   | not DE   | not DE   | not DE   | not DE   | not DE      |
| not DE   | not DE      | not DE   | not DE   | not DE   | not DE   | not DE   | not DE      |
| not DE   | not DE      | not DE   | not DE   | not DE   | not DE   | not DE   | not DE      |
| -2.15148 | 0.000705436 | not DE   | not DE   | not DE   | not DE   | -2.12294 | 0.031429339 |
| not DE   | not DE      | not DE   | not DE   | not DE   | not DE   | not DE   | not DE      |
| 1.045299 | 0.018391436 | not DE   | not DE   | not DE   | not DE   | 1.629186 | 0.000225211 |
| not DE   | not DE      | not DE   | not DE   | not DE   | not DE   | not DE   | not DE      |
| not DE   | not DE      | not DE   | not DE   | not DE   | not DE   | not DE   | not DE      |
| not DE   | not DE      | not DE   | not DE   | not DE   | not DE   | not DE   | not DE      |
| not DE   | not DE      | not DE   | not DE   | not DE   | not DE   | not DE   | not DE      |
| not DE   | not DE      | not DE   | not DE   | not DE   | not DE   | not DE   | not DE      |
| not DE   | not DE      | not DE   | not DE   | not DE   | not DE   | not DE   | not DE      |
| not DE   | not DE      | not DE   | not DE   | not DE   | not DE   | not DE   | not DE      |
| not DE   | not DE      | not DE   | not DE   | not DE   | not DE   | not DE   | not DE      |
| not DE   | not DE      | not DE   | not DE   | not DE   | not DE   | not DE   | not DE      |
| not DE   | not DE      | not DE   | not DE   | not DE   | not DE   | -2.34787 | 4.25E-06    |
| not DE   | not DE      | not DE   | not DE   | not DE   | not DE   | not DE   | not DE      |
| not DE   | not DE      | not DE   | not DE   | not DE   | not DE   | not DE   | not DE      |
| not DE   | not DE      | -1.35718 | 0.024314 | not DE   | not DE   | not DE   | not DE      |
| not DE   | not DE      | not DE   | not DE   | not DE   | not DE   | not DE   | not DE      |
| not DE   | not DE      | not DE   | not DE   | not DE   | not DE   | not DE   | not DE      |
| not DE   | not DE      | not DE   | not DE   | not DE   | not DE   | not DE   | not DE      |
| not DE   | not DE      | not DE   | not DE   | not DE   | not DE   | -3.73138 | 0.002995617 |
| not DE   | not DE      | not DE   | not DE   | not DE   | not DE   | not DE   | not DE      |
| not DE   | not DE      | not DE   | not DE   | not DE   | not DE   | not DE   | not DE      |
| -2.5508  | 1.87E-12    | -1.02354 | 0.020374 | not DE   | not DE   | -3.31646 | 1.12E-14    |
| not DE   | not DE      | not DE   | not DE   | not DE   | not DE   | not DE   | not DE      |
| not DE   | not DE      | not DE   | not DE   | not DE   | not DE   | not DE   | not DE      |
| not DE   | not DE      | not DE   | not DE   | not DE   | not DE   | not DE   | not DE      |
| not DE   | not DE      | not DE   | not DE   | not DE   | not DE   | not DE   | not DE      |
| not DE   | not DE      | not DE   | not DE   | not DE   | not DE   | not DE   | not DE      |
| not DE   | not DE      | not DE   | not DE   | not DE   | not DE   | not DE   | not DE      |
| not DE   | not DE      | not DE   | not DE   | not DE   | not DE   | not DE   | not DE      |
| not DE   | not DE      | not DE   | not DE   | not DE   | not DE   | not DE   | not DE      |
| not DE   | not DE      | not DE   | not DE   | not DE   | not DE   | not DE   | not DE      |
| not DE   | not DE      | not DE   | not DE   | not DE   | not DE   | not DE   | not DE      |
| not DE   | not DE      | not DE   | not DE   | not DE   | not DE   | not DE   | not DE      |
| not DE   | not DE      | not DE   | not DE   | not DE   | not DE   | not DE   | not DE      |
| not DE   | not DE      | not DE   | not DE   | not DE   | not DE   | not DE   | not DE      |
| -1.99788 | 0.001151893 | not DE   | not DE   | 1.263544 | 0.009411 | -3.81227 | 6.37E-11    |
| not DE   | not DE      | not DE   | not DE   | not DE   | not DE   | not DE   | not DE      |
| not DE   | not DE      | 2.940631 | 0.023141 | not DE   | not DE   | not DE   | not DE      |

|          |             |          |          |          |          |          |             |
|----------|-------------|----------|----------|----------|----------|----------|-------------|
| not DE   | not DE      | not DE   | not DE   | not DE   | not DE   | not DE   | not DE      |
| not DE   | not DE      | not DE   | not DE   | not DE   | not DE   | not DE   | not DE      |
| not DE   | not DE      | not DE   | not DE   | not DE   | not DE   | not DE   | not DE      |
| -1.05044 | 0.005154811 | not DE   | not DE   | not DE   | not DE   | -2.64664 | 5.90E-13    |
| not DE   | not DE      | not DE   | not DE   | not DE   | not DE   | not DE   | not DE      |
| not DE   | not DE      | not DE   | not DE   | not DE   | not DE   | not DE   | not DE      |
| -1.15851 | 0.022711812 | -1.92114 | 0.003623 | -1.28934 | 0.015172 | -1.23638 | 0.019474583 |
| -1.48581 | 0.002095117 | not DE   | not DE   | not DE   | not DE   | -1.65182 | 0.010900385 |
| not DE   | not DE      | not DE   | not DE   | not DE   | not DE   | not DE   | not DE      |
| not DE   | not DE      | not DE   | not DE   | not DE   | not DE   | not DE   | not DE      |
| not DE   | not DE      | not DE   | not DE   | not DE   | not DE   | not DE   | not DE      |
| 1.693033 | 0.00055658  | not DE   | not DE   | not DE   | not DE   | 1.644805 | 5.35E-05    |
| not DE   | not DE      | not DE   | not DE   | not DE   | not DE   | not DE   | not DE      |
| -1.3337  | 0.001099267 | not DE   | not DE   | not DE   | not DE   | not DE   | not DE      |
| not DE   | not DE      | not DE   | not DE   | not DE   | not DE   | not DE   | not DE      |
| not DE   | not DE      | not DE   | not DE   | not DE   | not DE   | not DE   | not DE      |
| not DE   | not DE      | not DE   | not DE   | not DE   | not DE   | not DE   | not DE      |
| not DE   | not DE      | not DE   | not DE   | not DE   | not DE   | not DE   | not DE      |
| not DE   | not DE      | not DE   | not DE   | not DE   | not DE   | not DE   | not DE      |
| not DE   | not DE      | not DE   | not DE   | not DE   | not DE   | -2.54504 | 3.29E-05    |
| not DE   | not DE      | not DE   | not DE   | not DE   | not DE   | not DE   | not DE      |
| not DE   | not DE      | not DE   | not DE   | not DE   | not DE   | not DE   | not DE      |
| not DE   | not DE      | not DE   | not DE   | not DE   | not DE   | -2.46207 | 0.004488061 |
| not DE   | not DE      | not DE   | not DE   | not DE   | not DE   | not DE   | not DE      |
| not DE   | not DE      | not DE   | not DE   | not DE   | not DE   | not DE   | not DE      |
| not DE   | not DE      | not DE   | not DE   | not DE   | not DE   | not DE   | not DE      |
| -1.15145 | 0.005278149 | not DE   | not DE   | not DE   | not DE   | -1.03973 | 0.012071608 |
| not DE   | not DE      | not DE   | not DE   | not DE   | not DE   | not DE   | not DE      |
| not DE   | not DE      | not DE   | not DE   | not DE   | not DE   | not DE   | not DE      |
| not DE   | not DE      | not DE   | not DE   | not DE   | not DE   | 1.375954 | 3.60E-09    |
| not DE   | not DE      | not DE   | not DE   | not DE   | not DE   | not DE   | not DE      |
| not DE   | not DE      | not DE   | not DE   | not DE   | not DE   | not DE   | not DE      |
| not DE   | not DE      | not DE   | not DE   | not DE   | not DE   | not DE   | not DE      |
| not DE   | not DE      | not DE   | not DE   | not DE   | not DE   | not DE   | not DE      |
| not DE   | not DE      | not DE   | not DE   | not DE   | not DE   | not DE   | not DE      |
| not DE   | not DE      | not DE   | not DE   | 1.506409 | 6.76E-10 | not DE   | not DE      |
| not DE   | not DE      | not DE   | not DE   | not DE   | not DE   | not DE   | not DE      |
| 2.167908 | 1.15E-05    | not DE   | not DE   | 1.664586 | 0.009708 | 2.302836 | 4.29E-07    |
| not DE   | not DE      | not DE   | not DE   | not DE   | not DE   | not DE   | not DE      |
| not DE   | not DE      | not DE   | not DE   | not DE   | not DE   | -2.80467 | 0.00342068  |
| not DE   | not DE      | -4.98718 | 9.42E-08 | not DE   | not DE   | -3.00912 | 0.001712697 |
| not DE   | not DE      | not DE   | not DE   | not DE   | not DE   | not DE   | not DE      |
| not DE   | not DE      | not DE   | not DE   | not DE   | not DE   | not DE   | not DE      |
| not DE   | not DE      | not DE   | not DE   | not DE   | not DE   | not DE   | not DE      |
| not DE   | not DE      | not DE   | not DE   | not DE   | not DE   | not DE   | not DE      |
| not DE   | not DE      | not DE   | not DE   | not DE   | not DE   | not DE   | not DE      |
| not DE   | not DE      | not DE   | not DE   | not DE   | not DE   | not DE   | not DE      |
| not DE   | not DE      | not DE   | not DE   | not DE   | not DE   | not DE   | not DE      |
| 2.696712 | 7.84E-08    | 3.11847  | 0.005169 | not DE   | not DE   | 2.686953 | 1.64E-07    |
| not DE   | not DE      | not DE   | not DE   | not DE   | not DE   | not DE   | not DE      |
| not DE   | not DE      | not DE   | not DE   | not DE   | not DE   | not DE   | not DE      |
| not DE   | not DE      | not DE   | not DE   | not DE   | not DE   | not DE   | not DE      |
| not DE   | not DE      | 2.318755 | 0.033734 | not DE   | not DE   | not DE   | not DE      |
| not DE   | not DE      | not DE   | not DE   | not DE   | not DE   | not DE   | not DE      |
| not DE   | not DE      | not DE   | not DE   | not DE   | not DE   | not DE   | not DE      |
| not DE   | not DE      | not DE   | not DE   | not DE   | not DE   | not DE   | not DE      |
| not DE   | not DE      | not DE   | not DE   | not DE   | not DE   | not DE   | not DE      |
| 2.179291 | 5.11E-13    | not DE   | not DE   | not DE   | not DE   | 1.615032 | 2.43E-05    |















|          |             |          |          |          |          |          |             |
|----------|-------------|----------|----------|----------|----------|----------|-------------|
| not DE   | not DE      | not DE   | not DE   | not DE   | not DE   | not DE   | not DE      |
| not DE   | not DE      | not DE   | not DE   | not DE   | not DE   | not DE   | not DE      |
| not DE   | not DE      | not DE   | not DE   | not DE   | not DE   | 2.443914 | 0.009227405 |
| not DE   | not DE      | not DE   | not DE   | not DE   | not DE   | not DE   | not DE      |
| not DE   | not DE      | not DE   | not DE   | not DE   | not DE   | not DE   | not DE      |
| 1.061064 | 1.43E-08    | not DE   | not DE   | not DE   | not DE   | not DE   | not DE      |
| not DE   | not DE      | not DE   | not DE   | not DE   | not DE   | not DE   | not DE      |
| not DE   | not DE      | not DE   | not DE   | not DE   | not DE   | -1.0746  | 0.034053237 |
| not DE   | not DE      | not DE   | not DE   | not DE   | not DE   | not DE   | not DE      |
| not DE   | not DE      | not DE   | not DE   | not DE   | not DE   | not DE   | not DE      |
| 4.182943 | 7.06E-07    | not DE   | not DE   | not DE   | not DE   | 4.753094 | 1.33E-09    |
| not DE   | not DE      | not DE   | not DE   | not DE   | not DE   | not DE   | not DE      |
| not DE   | not DE      | not DE   | not DE   | not DE   | not DE   | not DE   | not DE      |
| not DE   | not DE      | not DE   | not DE   | not DE   | not DE   | not DE   | not DE      |
| not DE   | not DE      | not DE   | not DE   | not DE   | not DE   | not DE   | not DE      |
| not DE   | not DE      | not DE   | not DE   | not DE   | not DE   | not DE   | not DE      |
| not DE   | not DE      | not DE   | not DE   | not DE   | not DE   | not DE   | not DE      |
| not DE   | not DE      | not DE   | not DE   | not DE   | not DE   | -1.25749 | 0.000160684 |
| -1.49126 | 0.00960162  | -3.45198 | 0.007859 | not DE   | not DE   | -2.92715 | 3.25E-05    |
| not DE   | not DE      | not DE   | not DE   | not DE   | not DE   | not DE   | not DE      |
| not DE   | not DE      | not DE   | not DE   | not DE   | not DE   | not DE   | not DE      |
| not DE   | not DE      | 1.321937 | 0.012364 | 1.92227  | 0.000808 | not DE   | not DE      |
| not DE   | not DE      | not DE   | not DE   | not DE   | not DE   | not DE   | not DE      |
| not DE   | not DE      | not DE   | not DE   | not DE   | not DE   | not DE   | not DE      |
| not DE   | not DE      | not DE   | not DE   | not DE   | not DE   | not DE   | not DE      |
| not DE   | not DE      | not DE   | not DE   | not DE   | not DE   | not DE   | not DE      |
| not DE   | not DE      | not DE   | not DE   | not DE   | not DE   | not DE   | not DE      |
| not DE   | not DE      | not DE   | not DE   | not DE   | not DE   | not DE   | not DE      |
| not DE   | not DE      | not DE   | not DE   | not DE   | not DE   | not DE   | not DE      |
| 2.263615 | 2.17E-06    | not DE   | not DE   | not DE   | not DE   | 2.178086 | 2.88E-08    |
| 1.38874  | 0.006320155 | not DE   | not DE   | -1.00446 | 0.01834  | 1.106929 | 0.033483065 |
| not DE   | not DE      | not DE   | not DE   | not DE   | not DE   | not DE   | not DE      |
| not DE   | not DE      | not DE   | not DE   | not DE   | not DE   | not DE   | not DE      |
| not DE   | not DE      | not DE   | not DE   | not DE   | not DE   | 1.264168 | 0.00207513  |
| not DE   | not DE      | not DE   | not DE   | not DE   | not DE   | not DE   | not DE      |
| not DE   | not DE      | not DE   | not DE   | not DE   | not DE   | not DE   | not DE      |
| not DE   | not DE      | 4.625099 | 0.00296  | not DE   | not DE   | not DE   | not DE      |
| not DE   | not DE      | not DE   | not DE   | not DE   | not DE   | not DE   | not DE      |
| not DE   | not DE      | not DE   | not DE   | not DE   | not DE   | not DE   | not DE      |
| not DE   | not DE      | not DE   | not DE   | not DE   | not DE   | not DE   | not DE      |
| not DE   | not DE      | not DE   | not DE   | not DE   | not DE   | not DE   | not DE      |
| not DE   | not DE      | not DE   | not DE   | not DE   | not DE   | not DE   | not DE      |
| not DE   | not DE      | 2.26433  | 0.004784 | not DE   | not DE   | 2.927804 | 0.00827923  |
| -1.04836 | 0.028771407 | not DE   | not DE   | not DE   | not DE   | -1.76992 | 4.77E-05    |
| not DE   | not DE      | not DE   | not DE   | not DE   | not DE   | not DE   | not DE      |
| not DE   | not DE      | not DE   | not DE   | not DE   | not DE   | not DE   | not DE      |
| not DE   | not DE      | not DE   | not DE   | not DE   | not DE   | not DE   | not DE      |
| not DE   | not DE      | not DE   | not DE   | not DE   | not DE   | not DE   | not DE      |
| not DE   | not DE      | not DE   | not DE   | not DE   | not DE   | not DE   | not DE      |
| not DE   | not DE      | not DE   | not DE   | not DE   | not DE   | not DE   | not DE      |
| not DE   | not DE      | not DE   | not DE   | not DE   | not DE   | not DE   | not DE      |
| not DE   | not DE      | not DE   | not DE   | not DE   | not DE   | not DE   | not DE      |
| not DE   | not DE      | not DE   | not DE   | not DE   | not DE   | not DE   | not DE      |
| not DE   | not DE      | not DE   | not DE   | not DE   | not DE   | not DE   | not DE      |
| not DE   | not DE      | not DE   | not DE   | not DE   | not DE   | not DE   | not DE      |
| not DE   | not DE      | not DE   | not DE   | not DE   | not DE   | not DE   | not DE      |
| not DE   | not DE      | not DE   | not DE   | not DE   | not DE   | not DE   | not DE      |
| not DE   | not DE      | not DE   | not DE   | not DE   | not DE   | not DE   | not DE      |
| not DE   | not DE      | not DE   | not DE   | not DE   | not DE   | not DE   | not DE      |
| 1.189639 | 0.000204934 | not DE   | not DE   | not DE   | not DE   | 1.695438 | 2.66E-05    |
| not DE   | not DE      | 2.121837 | 0.036388 | not DE   | not DE   | not DE   | not DE      |















|          |             |          |          |          |          |          |             |
|----------|-------------|----------|----------|----------|----------|----------|-------------|
| not DE   | not DE      | 2.71653  | 0.011338 | not DE   | not DE   | not DE   | not DE      |
| not DE   | not DE      | not DE   | not DE   | not DE   | not DE   | not DE   | not DE      |
| not DE   | not DE      | not DE   | not DE   | not DE   | not DE   | not DE   | not DE      |
| not DE   | not DE      | not DE   | not DE   | not DE   | not DE   | not DE   | not DE      |
| not DE   | not DE      | not DE   | not DE   | not DE   | not DE   | not DE   | not DE      |
| not DE   | not DE      | not DE   | not DE   | not DE   | not DE   | not DE   | not DE      |
| -2.9451  | 0.000125894 | not DE   | not DE   | not DE   | not DE   | -2.32154 | 0.00521083  |
| 1.001508 | 0.000210729 | not DE   | not DE   | not DE   | not DE   | not DE   | not DE      |
| not DE   | not DE      | not DE   | not DE   | not DE   | not DE   | not DE   | not DE      |
| not DE   | not DE      | not DE   | not DE   | not DE   | not DE   | not DE   | not DE      |
| not DE   | not DE      | not DE   | not DE   | not DE   | not DE   | not DE   | not DE      |
| not DE   | not DE      | not DE   | not DE   | not DE   | not DE   | not DE   | not DE      |
| not DE   | not DE      | not DE   | not DE   | not DE   | not DE   | not DE   | not DE      |
| not DE   | not DE      | not DE   | not DE   | not DE   | not DE   | not DE   | not DE      |
| not DE   | not DE      | not DE   | not DE   | not DE   | not DE   | not DE   | not DE      |
| -1.58447 | 4.77E-06    | not DE   | not DE   | not DE   | not DE   | -1.87437 | 4.66E-06    |
| not DE   | not DE      | not DE   | not DE   | not DE   | not DE   | not DE   | not DE      |
| not DE   | not DE      | not DE   | not DE   | not DE   | not DE   | not DE   | not DE      |
| not DE   | not DE      | not DE   | not DE   | not DE   | not DE   | not DE   | not DE      |
| not DE   | not DE      | not DE   | not DE   | not DE   | not DE   | not DE   | not DE      |
| not DE   | not DE      | not DE   | not DE   | not DE   | not DE   | not DE   | not DE      |
| not DE   | not DE      | not DE   | not DE   | not DE   | not DE   | not DE   | not DE      |
| not DE   | not DE      | not DE   | not DE   | not DE   | not DE   | not DE   | not DE      |
| -2.58895 | 1.44E-10    | -1.48044 | 0.003098 | not DE   | not DE   | -1.24145 | 0.000529067 |
| not DE   | not DE      | not DE   | not DE   | not DE   | not DE   | not DE   | not DE      |
| not DE   | not DE      | not DE   | not DE   | not DE   | not DE   | not DE   | not DE      |
| not DE   | not DE      | not DE   | not DE   | not DE   | not DE   | not DE   | not DE      |
| not DE   | not DE      | not DE   | not DE   | not DE   | not DE   | not DE   | not DE      |
| not DE   | not DE      | not DE   | not DE   | not DE   | not DE   | not DE   | not DE      |
| not DE   | not DE      | not DE   | not DE   | not DE   | not DE   | not DE   | not DE      |
| not DE   | not DE      | not DE   | not DE   | not DE   | not DE   | not DE   | not DE      |
| not DE   | not DE      | not DE   | not DE   | not DE   | not DE   | not DE   | not DE      |
| not DE   | not DE      | not DE   | not DE   | not DE   | not DE   | not DE   | not DE      |
| not DE   | not DE      | not DE   | not DE   | not DE   | not DE   | not DE   | not DE      |
| -1.56608 | 0.002120078 | not DE   | not DE   | 1.854799 | 0.000891 | not DE   | not DE      |
| -1.19306 | 0.005736663 | not DE   | not DE   | not DE   | not DE   | not DE   | not DE      |
| not DE   | not DE      | not DE   | not DE   | not DE   | not DE   | not DE   | not DE      |
| not DE   | not DE      | not DE   | not DE   | not DE   | not DE   | not DE   | not DE      |
| not DE   | not DE      | not DE   | not DE   | not DE   | not DE   | not DE   | not DE      |
| not DE   | not DE      | not DE   | not DE   | not DE   | not DE   | not DE   | not DE      |
| -2.09625 | 0.000243018 | -2.57083 | 0.004592 | -1.08428 | 0.012095 | -1.41469 | 5.43E-05    |
| not DE   | not DE      | not DE   | not DE   | not DE   | not DE   | not DE   | not DE      |
| not DE   | not DE      | not DE   | not DE   | not DE   | not DE   | not DE   | not DE      |
| not DE   | not DE      | not DE   | not DE   | not DE   | not DE   | not DE   | not DE      |
| not DE   | not DE      | not DE   | not DE   | not DE   | not DE   | not DE   | not DE      |
| not DE   | not DE      | not DE   | not DE   | not DE   | not DE   | not DE   | not DE      |
| -3.40732 | 7.71E-11    | not DE   | not DE   | 1.289604 | 0.02308  | -5.84119 | 1.45E-19    |
| not DE   | not DE      | not DE   | not DE   | not DE   | not DE   | not DE   | not DE      |
| not DE   | not DE      | not DE   | not DE   | not DE   | not DE   | not DE   | not DE      |
| not DE   | not DE      | not DE   | not DE   | not DE   | not DE   | not DE   | not DE      |
| not DE   | not DE      | not DE   | not DE   | not DE   | not DE   | not DE   | not DE      |
| not DE   | not DE      | not DE   | not DE   | not DE   | not DE   | not DE   | not DE      |
| not DE   | not DE      | not DE   | not DE   | not DE   | not DE   | not DE   | not DE      |
| not DE   | not DE      | not DE   | not DE   | not DE   | not DE   | not DE   | not DE      |
| not DE   | not DE      | not DE   | not DE   | not DE   | not DE   | not DE   | not DE      |
| not DE   | not DE      | not DE   | not DE   | not DE   | not DE   | not DE   | not DE      |
| 2.53885  | 0.046093154 | not DE   | not DE   | not DE   | not DE   | not DE   | not DE      |









|          |             |          |          |        |        |          |             |
|----------|-------------|----------|----------|--------|--------|----------|-------------|
| not DE   | not DE      | not DE   | not DE   | not DE | not DE | not DE   | not DE      |
| not DE   | not DE      | not DE   | not DE   | not DE | not DE | not DE   | not DE      |
| not DE   | not DE      | not DE   | not DE   | not DE | not DE | not DE   | not DE      |
| not DE   | not DE      | not DE   | not DE   | not DE | not DE | not DE   | not DE      |
| -3.01449 | 0.002404042 | not DE   | not DE   | not DE | not DE | -4.43789 | 0.000271285 |
| not DE   | not DE      | not DE   | not DE   | not DE | not DE | not DE   | not DE      |
| not DE   | not DE      | not DE   | not DE   | not DE | not DE | not DE   | not DE      |
| not DE   | not DE      | not DE   | not DE   | not DE | not DE | not DE   | not DE      |
| not DE   | not DE      | not DE   | not DE   | not DE | not DE | not DE   | not DE      |
| not DE   | not DE      | not DE   | not DE   | not DE | not DE | not DE   | not DE      |
| 2.722884 | 0.012730549 | not DE   | not DE   | not DE | not DE | 2.815719 | 0.034559005 |
| not DE   | not DE      | not DE   | not DE   | not DE | not DE | not DE   | not DE      |
| not DE   | not DE      | not DE   | not DE   | not DE | not DE | not DE   | not DE      |
| not DE   | not DE      | not DE   | not DE   | not DE | not DE | not DE   | not DE      |
| 1.685219 | 2.91E-05    | not DE   | not DE   | not DE | not DE | 2.678945 | 3.68E-09    |
| not DE   | not DE      | not DE   | not DE   | not DE | not DE | not DE   | not DE      |
| not DE   | not DE      | not DE   | not DE   | not DE | not DE | not DE   | not DE      |
| not DE   | not DE      | not DE   | not DE   | not DE | not DE | not DE   | not DE      |
| not DE   | not DE      | not DE   | not DE   | not DE | not DE | not DE   | not DE      |
| not DE   | not DE      | not DE   | not DE   | not DE | not DE | not DE   | not DE      |
| not DE   | not DE      | not DE   | not DE   | not DE | not DE | not DE   | not DE      |
| not DE   | not DE      | not DE   | not DE   | not DE | not DE | not DE   | not DE      |
| not DE   | not DE      | not DE   | not DE   | not DE | not DE | not DE   | not DE      |
| not DE   | not DE      | not DE   | not DE   | not DE | not DE | not DE   | not DE      |
| not DE   | not DE      | not DE   | not DE   | not DE | not DE | not DE   | not DE      |
| not DE   | not DE      | not DE   | not DE   | not DE | not DE | not DE   | not DE      |
| not DE   | not DE      | not DE   | not DE   | not DE | not DE | not DE   | not DE      |
| -2.74487 | 0.011658526 | not DE   | not DE   | not DE | not DE | -3.33827 | 0.003088397 |
| 1.275929 | 0.000464721 | not DE   | not DE   | not DE | not DE | 1.553271 | 0.00323761  |
| 2.158176 | 1.96E-07    | not DE   | not DE   | not DE | not DE | 2.033255 | 1.10E-09    |
| not DE   | not DE      | not DE   | not DE   | not DE | not DE | not DE   | not DE      |
| not DE   | not DE      | not DE   | not DE   | not DE | not DE | not DE   | not DE      |
| not DE   | not DE      | not DE   | not DE   | not DE | not DE | not DE   | not DE      |
| not DE   | not DE      | not DE   | not DE   | not DE | not DE | not DE   | not DE      |
| not DE   | not DE      | not DE   | not DE   | not DE | not DE | not DE   | not DE      |
| not DE   | not DE      | not DE   | not DE   | not DE | not DE | not DE   | not DE      |
| not DE   | not DE      | not DE   | not DE   | not DE | not DE | not DE   | not DE      |
| not DE   | not DE      | not DE   | not DE   | not DE | not DE | not DE   | not DE      |
| not DE   | not DE      | not DE   | not DE   | not DE | not DE | not DE   | not DE      |
| -1.55869 | 0.003897396 | not DE   | not DE   | not DE | not DE | -2.03422 | 5.48E-06    |
| 1.444662 | 1.43E-07    | not DE   | not DE   | not DE | not DE | 1.650403 | 0.003663053 |
| not DE   | not DE      | not DE   | not DE   | not DE | not DE | not DE   | not DE      |
| not DE   | not DE      | not DE   | not DE   | not DE | not DE | not DE   | not DE      |
| not DE   | not DE      | not DE   | not DE   | not DE | not DE | not DE   | not DE      |
| not DE   | not DE      | not DE   | not DE   | not DE | not DE | not DE   | not DE      |
| not DE   | not DE      | not DE   | not DE   | not DE | not DE | not DE   | not DE      |
| not DE   | not DE      | not DE   | not DE   | not DE | not DE | not DE   | not DE      |
| not DE   | not DE      | not DE   | not DE   | not DE | not DE | not DE   | not DE      |
| not DE   | not DE      | not DE   | not DE   | not DE | not DE | not DE   | not DE      |
| not DE   | not DE      | not DE   | not DE   | not DE | not DE | not DE   | not DE      |
| not DE   | not DE      | not DE   | not DE   | not DE | not DE | not DE   | not DE      |
| not DE   | not DE      | not DE   | not DE   | not DE | not DE | not DE   | not DE      |
| -1.66016 | 0.037780141 | -3.3479  | 0.014941 | not DE | not DE | -3.09269 | 0.001737107 |
| not DE   | not DE      | 1.290015 | 0.004462 | not DE | not DE | not DE   | not DE      |
| 1.376939 | 0.004034984 | not DE   | not DE   | not DE | not DE | 1.858336 | 9.33E-05    |





















































































|                        |                     |                     |                   |        |                        |
|------------------------|---------------------|---------------------|-------------------|--------|------------------------|
| -2. 21517 3. 06E-06    | not DE              | not DE              | not DE            | not DE | -3. 26992 4. 17E-08    |
| not DE not DE          | not DE              | not DE              | not DE            | not DE | not DE not DE          |
| not DE not DE          | not DE              | not DE              | not DE            | not DE | not DE not DE          |
| not DE not DE          | not DE              | not DE              | not DE            | not DE | not DE not DE          |
| not DE not DE          | not DE              | not DE              | 1. 02179 0. 00319 | not DE | not DE not DE          |
| not DE not DE          | not DE              | not DE              | not DE            | not DE | not DE not DE          |
| not DE not DE          | not DE              | not DE              | not DE            | not DE | not DE not DE          |
| not DE not DE          | not DE              | not DE              | not DE            | not DE | not DE not DE          |
| not DE not DE          | not DE              | not DE              | not DE            | not DE | not DE not DE          |
| not DE not DE          | not DE              | not DE              | not DE            | not DE | not DE not DE          |
| 1. 447892 0. 014628414 | not DE              | not DE              | not DE            | not DE | 1. 914918 0. 000977546 |
| not DE not DE          | not DE              | not DE              | not DE            | not DE | not DE not DE          |
| not DE not DE          | not DE              | not DE              | not DE            | not DE | not DE not DE          |
| not DE not DE          | not DE              | not DE              | not DE            | not DE | 1. 525027 2. 63E-08    |
| not DE not DE          | not DE              | not DE              | not DE            | not DE | not DE not DE          |
| -4. 08271 2. 11E-06    | not DE              | not DE              | not DE            | not DE | -3. 82896 5. 90E-06    |
| not DE not DE          | not DE              | not DE              | not DE            | not DE | not DE not DE          |
| not DE not DE          | not DE              | not DE              | not DE            | not DE | not DE not DE          |
| not DE not DE          | -4. 81726 0. 000123 | 1. 509573 0. 026472 | not DE            | not DE | -1. 46345 0. 017396363 |
| -1. 66624 0. 002865994 | not DE              | not DE              | not DE            | not DE | -1. 94595 0. 002847768 |
| not DE not DE          | -1. 10769 0. 006057 | not DE              | not DE            | not DE | not DE not DE          |
| 1. 651133 0. 000202709 | not DE              | not DE              | not DE            | not DE | 3. 198685 4. 26E-12    |
| 1. 820527 0. 001135688 | not DE              | not DE              | not DE            | not DE | 2. 856447 7. 19E-08    |
| not DE not DE          | not DE              | not DE              | not DE            | not DE | not DE not DE          |
| not DE not DE          | not DE              | not DE              | not DE            | not DE | not DE not DE          |
| not DE not DE          | not DE              | not DE              | not DE            | not DE | not DE not DE          |
| not DE not DE          | not DE              | not DE              | not DE            | not DE | not DE not DE          |
| not DE not DE          | not DE              | not DE              | not DE            | not DE | not DE not DE          |
| 1. 202074 0. 000945352 | not DE              | not DE              | not DE            | not DE | 2. 222001 2. 98E-11    |
| not DE not DE          | not DE              | not DE              | not DE            | not DE | not DE not DE          |
| not DE not DE          | not DE              | not DE              | not DE            | not DE | not DE not DE          |
| not DE not DE          | not DE              | not DE              | not DE            | not DE | not DE not DE          |
| not DE not DE          | not DE              | not DE              | not DE            | not DE | not DE not DE          |
| not DE not DE          | not DE              | not DE              | not DE            | not DE | not DE not DE          |
| not DE not DE          | not DE              | not DE              | not DE            | not DE | not DE not DE          |
| not DE not DE          | not DE              | not DE              | not DE            | not DE | not DE not DE          |
| 3. 360143 0. 013403733 | not DE              | not DE              | not DE            | not DE | not DE not DE          |
| not DE not DE          | not DE              | not DE              | not DE            | not DE | not DE not DE          |
| 6. 240015 0. 000169044 | not DE              | not DE              | not DE            | not DE | 5. 881396 0. 000362897 |
| not DE not DE          | not DE              | not DE              | not DE            | not DE | 1. 035432 0. 029386358 |
| not DE not DE          | not DE              | not DE              | not DE            | not DE | not DE not DE          |
| not DE not DE          | not DE              | not DE              | not DE            | not DE | not DE not DE          |
| not DE not DE          | not DE              | not DE              | not DE            | not DE | not DE not DE          |
| not DE not DE          | not DE              | not DE              | not DE            | not DE | not DE not DE          |
| not DE not DE          | not DE              | not DE              | not DE            | not DE | not DE not DE          |
| not DE not DE          | not DE              | not DE              | not DE            | not DE | not DE not DE          |
| not DE not DE          | not DE              | not DE              | not DE            | not DE | not DE not DE          |
| not DE not DE          | not DE              | not DE              | not DE            | not DE | not DE not DE          |
| not DE not DE          | not DE              | not DE              | not DE            | not DE | not DE not DE          |
| not DE not DE          | not DE              | not DE              | not DE            | not DE | not DE not DE          |
| not DE not DE          | not DE              | not DE              | not DE            | not DE | not DE not DE          |
| not DE not DE          | not DE              | not DE              | not DE            | not DE | not DE not DE          |
| not DE not DE          | not DE              | not DE              | not DE            | not DE | not DE not DE          |
| not DE not DE          | not DE              | not DE              | not DE            | not DE | not DE not DE          |
| not DE not DE          | not DE              | not DE              | not DE            | not DE | not DE not DE          |
| not DE not DE          | not DE              | not DE              | not DE            | not DE | not DE not DE          |
| -1. 12692 2. 28E-08    | not DE              | not DE              | not DE            | not DE | not DE not DE          |































































|           |              |           |           |           |           |           |              |
|-----------|--------------|-----------|-----------|-----------|-----------|-----------|--------------|
| not DE    | not DE       | not DE    | not DE    | not DE    | not DE    | not DE    | not DE       |
| not DE    | not DE       | not DE    | not DE    | not DE    | not DE    | not DE    | not DE       |
| not DE    | not DE       | not DE    | not DE    | not DE    | not DE    | not DE    | not DE       |
| not DE    | not DE       | not DE    | not DE    | not DE    | not DE    | not DE    | not DE       |
| not DE    | not DE       | not DE    | not DE    | not DE    | not DE    | not DE    | not DE       |
| not DE    | not DE       | not DE    | not DE    | not DE    | not DE    | not DE    | not DE       |
| not DE    | not DE       | not DE    | not DE    | not DE    | not DE    | not DE    | not DE       |
| not DE    | not DE       | not DE    | not DE    | not DE    | not DE    | not DE    | not DE       |
| not DE    | not DE       | not DE    | not DE    | not DE    | not DE    | not DE    | not DE       |
| not DE    | not DE       | not DE    | not DE    | not DE    | not DE    | not DE    | not DE       |
| not DE    | not DE       | not DE    | not DE    | not DE    | not DE    | not DE    | not DE       |
| 2. 638765 | 0. 000919893 | not DE    | not DE    | not DE    | not DE    | not DE    | not DE       |
| not DE    | not DE       | 6. 697079 | 0. 002148 | not DE    | not DE    | not DE    | not DE       |
| not DE    | not DE       | not DE    | not DE    | not DE    | not DE    | not DE    | not DE       |
| not DE    | not DE       | not DE    | not DE    | not DE    | not DE    | not DE    | not DE       |
| not DE    | not DE       | not DE    | not DE    | not DE    | not DE    | not DE    | not DE       |
| -4. 62601 | 0. 000234229 | not DE    | not DE    | not DE    | not DE    | -7. 80653 | 4. 43E-06    |
| not DE    | not DE       | not DE    | not DE    | not DE    | not DE    | not DE    | not DE       |
| not DE    | not DE       | not DE    | not DE    | not DE    | not DE    | -1. 23517 | 1. 76E-05    |
| not DE    | not DE       | not DE    | not DE    | not DE    | not DE    | not DE    | not DE       |
| 1. 255916 | 9. 61E-08    | not DE    | not DE    | not DE    | not DE    | 1. 473108 | 2. 73E-09    |
| not DE    | not DE       | not DE    | not DE    | not DE    | not DE    | not DE    | not DE       |
| not DE    | not DE       | not DE    | not DE    | 1. 007299 | 4. 77E-05 | not DE    | not DE       |
| not DE    | not DE       | not DE    | not DE    | not DE    | not DE    | not DE    | not DE       |
| not DE    | not DE       | not DE    | not DE    | not DE    | not DE    | not DE    | not DE       |
| not DE    | not DE       | not DE    | not DE    | not DE    | not DE    | not DE    | not DE       |
| not DE    | not DE       | not DE    | not DE    | not DE    | not DE    | not DE    | not DE       |
| not DE    | not DE       | -2. 74963 | 0. 034624 | not DE    | not DE    | not DE    | not DE       |
| not DE    | not DE       | not DE    | not DE    | not DE    | not DE    | not DE    | not DE       |
| not DE    | not DE       | not DE    | not DE    | not DE    | not DE    | not DE    | not DE       |
| not DE    | not DE       | not DE    | not DE    | not DE    | not DE    | not DE    | not DE       |
| not DE    | not DE       | not DE    | not DE    | not DE    | not DE    | not DE    | not DE       |
| not DE    | not DE       | not DE    | not DE    | not DE    | not DE    | -1. 04462 | 0. 049600959 |
| not DE    | not DE       | not DE    | not DE    | not DE    | not DE    | not DE    | not DE       |
| not DE    | not DE       | not DE    | not DE    | not DE    | not DE    | not DE    | not DE       |
| not DE    | not DE       | not DE    | not DE    | not DE    | not DE    | not DE    | not DE       |
| not DE    | not DE       | not DE    | not DE    | not DE    | not DE    | not DE    | not DE       |
| not DE    | not DE       | not DE    | not DE    | not DE    | not DE    | not DE    | not DE       |
| not DE    | not DE       | not DE    | not DE    | not DE    | not DE    | not DE    | not DE       |
| not DE    | not DE       | not DE    | not DE    | not DE    | not DE    | -1. 0822  | 0. 026317361 |
| not DE    | not DE       | not DE    | not DE    | not DE    | not DE    | not DE    | not DE       |
| not DE    | not DE       | not DE    | not DE    | not DE    | not DE    | not DE    | not DE       |
| 3. 297588 | 6. 03E-21    | 2. 169585 | 0. 030407 | not DE    | not DE    | 3. 374862 | 2. 19E-13    |
| not DE    | not DE       | not DE    | not DE    | not DE    | not DE    | not DE    | not DE       |
| not DE    | not DE       | not DE    | not DE    | not DE    | not DE    | not DE    | not DE       |
| not DE    | not DE       | not DE    | not DE    | not DE    | not DE    | not DE    | not DE       |
| 2. 234458 | 0. 035375683 | not DE    | not DE    | not DE    | not DE    | not DE    | not DE       |
| 1. 776152 | 1. 19E-07    | not DE    | not DE    | not DE    | not DE    | not DE    | not DE       |
| not DE    | not DE       | not DE    | not DE    | not DE    | not DE    | not DE    | not DE       |
| not DE    | not DE       | not DE    | not DE    | not DE    | not DE    | not DE    | not DE       |
| not DE    | not DE       | not DE    | not DE    | not DE    | not DE    | not DE    | not DE       |
| not DE    | not DE       | not DE    | not DE    | not DE    | not DE    | not DE    | not DE       |
| not DE    | not DE       | not DE    | not DE    | not DE    | not DE    | not DE    | not DE       |
| 1. 238143 | 0. 039266388 | not DE    | not DE    | not DE    | not DE    | 1. 553467 | 0. 032158796 |
| not DE    | not DE       | not DE    | not DE    | not DE    | not DE    | not DE    | not DE       |
| -2. 41198 | 0. 00067747  | not DE    | not DE    | not DE    | not DE    | -4. 52038 | 0. 002119675 |









|          |             |          |          |          |          |          |             |
|----------|-------------|----------|----------|----------|----------|----------|-------------|
| not DE   | not DE      | not DE   | not DE   | not DE   | not DE   | not DE   | not DE      |
| -1.56654 | 0.000457801 | not DE   | not DE   | not DE   | not DE   | -2.51338 | 2.05E-10    |
| -3.09704 | 0.000937781 | not DE   | not DE   | not DE   | not DE   | -3.94686 | 2.60E-05    |
| not DE   | not DE      | not DE   | not DE   | not DE   | not DE   | not DE   | not DE      |
| 3.180566 | 9.40E-06    | not DE   | not DE   | not DE   | not DE   | not DE   | not DE      |
| -1.43601 | 0.001393105 | not DE   | not DE   | not DE   | not DE   | not DE   | not DE      |
| not DE   | not DE      | not DE   | not DE   | not DE   | not DE   | not DE   | not DE      |
| not DE   | not DE      | not DE   | not DE   | not DE   | not DE   | not DE   | not DE      |
| not DE   | not DE      | not DE   | not DE   | not DE   | not DE   | 1.06018  | 2.13E-06    |
| not DE   | not DE      | not DE   | not DE   | not DE   | not DE   | not DE   | not DE      |
| not DE   | not DE      | not DE   | not DE   | not DE   | not DE   | not DE   | not DE      |
| not DE   | not DE      | not DE   | not DE   | not DE   | not DE   | not DE   | not DE      |
| not DE   | not DE      | not DE   | not DE   | -2.16363 | 0.017671 | not DE   | not DE      |
| not DE   | not DE      | not DE   | not DE   | not DE   | not DE   | -5.51071 | 0.041347284 |
| -2.29578 | 0.001148476 | -2.08063 | 0.003208 | not DE   | not DE   | -4.24741 | 9.42E-11    |
| not DE   | not DE      | not DE   | not DE   | not DE   | not DE   | not DE   | not DE      |
| not DE   | not DE      | not DE   | not DE   | not DE   | not DE   | not DE   | not DE      |
| not DE   | not DE      | not DE   | not DE   | not DE   | not DE   | not DE   | not DE      |
| not DE   | not DE      | not DE   | not DE   | not DE   | not DE   | not DE   | not DE      |
| -1.07341 | 0.000762484 | not DE   | not DE   | not DE   | not DE   | -2.23564 | 5.58E-18    |
| not DE   | not DE      | not DE   | not DE   | not DE   | not DE   | not DE   | not DE      |
| not DE   | not DE      | not DE   | not DE   | not DE   | not DE   | not DE   | not DE      |
| not DE   | not DE      | not DE   | not DE   | not DE   | not DE   | not DE   | not DE      |
| not DE   | not DE      | not DE   | not DE   | not DE   | not DE   | not DE   | not DE      |
| not DE   | not DE      | not DE   | not DE   | not DE   | not DE   | not DE   | not DE      |
| not DE   | not DE      | not DE   | not DE   | not DE   | not DE   | not DE   | not DE      |
| not DE   | not DE      | not DE   | not DE   | not DE   | not DE   | not DE   | not DE      |
| not DE   | not DE      | not DE   | not DE   | not DE   | not DE   | not DE   | not DE      |
| not DE   | not DE      | not DE   | not DE   | not DE   | not DE   | 1.195891 | 7.09E-05    |
| not DE   | not DE      | not DE   | not DE   | not DE   | not DE   | not DE   | not DE      |
| not DE   | not DE      | not DE   | not DE   | not DE   | not DE   | not DE   | not DE      |
| not DE   | not DE      | not DE   | not DE   | not DE   | not DE   | 1.180617 | 0.011563468 |
| not DE   | not DE      | not DE   | not DE   | not DE   | not DE   | not DE   | not DE      |
| not DE   | not DE      | 1.537941 | 0.001207 | not DE   | not DE   | not DE   | not DE      |
| not DE   | not DE      | not DE   | not DE   | not DE   | not DE   | not DE   | not DE      |
| not DE   | not DE      | not DE   | not DE   | not DE   | not DE   | not DE   | not DE      |
| not DE   | not DE      | not DE   | not DE   | not DE   | not DE   | not DE   | not DE      |
| not DE   | not DE      | not DE   | not DE   | not DE   | not DE   | not DE   | not DE      |
| not DE   | not DE      | not DE   | not DE   | not DE   | not DE   | not DE   | not DE      |
| not DE   | not DE      | not DE   | not DE   | not DE   | not DE   | not DE   | not DE      |
| not DE   | not DE      | not DE   | not DE   | not DE   | not DE   | not DE   | not DE      |
| 1.306647 | 0.000162438 | not DE   | not DE   | not DE   | not DE   | 1.652767 | 1.17E-06    |
| -1.66827 | 0.034276437 | not DE   | not DE   | not DE   | not DE   | not DE   | not DE      |
| not DE   | not DE      | not DE   | not DE   | not DE   | not DE   | not DE   | not DE      |
| 1.529022 | 5.21E-08    | not DE   | not DE   | not DE   | not DE   | 1.761749 | 1.61E-06    |
| not DE   | not DE      | 3.436667 | 0.004374 | not DE   | not DE   | not DE   | not DE      |
| not DE   | not DE      | not DE   | not DE   | not DE   | not DE   | not DE   | not DE      |
| not DE   | not DE      | not DE   | not DE   | not DE   | not DE   | not DE   | not DE      |
| 2.03662  | 0.000553075 | not DE   | not DE   | not DE   | not DE   | 1.96039  | 0.006450029 |
| 1.120441 | 0.01447334  | not DE   | not DE   | not DE   | not DE   | not DE   | not DE      |
| not DE   | not DE      | not DE   | not DE   | not DE   | not DE   | not DE   | not DE      |
| not DE   | not DE      | 3.894918 | 0.011941 | not DE   | not DE   | not DE   | not DE      |
| not DE   | not DE      | not DE   | not DE   | not DE   | not DE   | not DE   | not DE      |
| 1.384879 | 0.000191315 | not DE   | not DE   | not DE   | not DE   | not DE   | not DE      |
| -1.18608 | 0.009304618 | not DE   | not DE   | not DE   | not DE   | -1.6837  | 4.15E-05    |
| not DE   | not DE      | not DE   | not DE   | not DE   | not DE   | not DE   | not DE      |
| not DE   | not DE      | not DE   | not DE   | not DE   | not DE   | -1.45466 | 0.001434152 |



















|                      |                   |        |                   |                      |                      |
|----------------------|-------------------|--------|-------------------|----------------------|----------------------|
| -1.48644 0.000166025 | not DE            | not DE | not DE            | not DE               | -2.10066 2.68E-05    |
| not DE not DE        | not DE            | not DE | not DE            | not DE               | not DE not DE        |
| not DE not DE        | not DE            | not DE | not DE            | not DE               | not DE not DE        |
| not DE not DE        | not DE            | not DE | not DE            | not DE               | not DE not DE        |
| not DE not DE        | not DE            | not DE | not DE            | not DE               | not DE not DE        |
| not DE not DE        | not DE            | not DE | not DE            | not DE               | not DE not DE        |
| not DE not DE        | not DE            | not DE | not DE            | not DE               | not DE not DE        |
| not DE not DE        | not DE            | not DE | not DE            | not DE               | not DE not DE        |
| 3.398214 0.001564172 | not DE            | not DE | not DE            | not DE               | 2.86098 0.026154016  |
| not DE not DE        | 4.41864 0.014449  | not DE | not DE            | not DE               | not DE not DE        |
| not DE not DE        | not DE            | not DE | 2.19994 0.003782  | not DE               | not DE not DE        |
| not DE not DE        | not DE            | not DE | not DE            | not DE               | not DE not DE        |
| not DE not DE        | not DE            | not DE | not DE            | not DE               | -2.63221 7.55E-07    |
| not DE not DE        | not DE            | not DE | not DE            | not DE               | not DE not DE        |
| not DE not DE        | not DE            | not DE | not DE            | not DE               | not DE not DE        |
| not DE not DE        | not DE            | not DE | not DE            | not DE               | not DE not DE        |
| not DE not DE        | not DE            | not DE | not DE            | not DE               | not DE not DE        |
| not DE not DE        | not DE            | not DE | not DE            | not DE               | not DE not DE        |
| not DE not DE        | not DE            | not DE | not DE            | not DE               | not DE not DE        |
| not DE not DE        | not DE            | not DE | not DE            | not DE               | not DE not DE        |
| -2.08831 0.00121121  | not DE            | not DE | 1.026201 0.034473 | -2.34302 0.016279865 |                      |
| not DE not DE        | not DE            | not DE | not DE            | not DE               | not DE not DE        |
| not DE not DE        | not DE            | not DE | not DE            | not DE               | not DE not DE        |
| not DE not DE        | not DE            | not DE | not DE            | not DE               | 1.139073 0.00268284  |
| not DE not DE        | not DE            | not DE | not DE            | not DE               | not DE not DE        |
| not DE not DE        | not DE            | not DE | not DE            | not DE               | not DE not DE        |
| not DE not DE        | not DE            | not DE | not DE            | not DE               | not DE not DE        |
| not DE not DE        | not DE            | not DE | not DE            | not DE               | not DE not DE        |
| not DE not DE        | not DE            | not DE | not DE            | not DE               | -1.50826 1.54E-05    |
| not DE not DE        | not DE            | not DE | not DE            | not DE               | not DE not DE        |
| not DE not DE        | not DE            | not DE | not DE            | not DE               | not DE not DE        |
| not DE not DE        | not DE            | not DE | not DE            | not DE               | not DE not DE        |
| not DE not DE        | not DE            | not DE | not DE            | not DE               | not DE not DE        |
| not DE not DE        | not DE            | not DE | not DE            | not DE               | not DE not DE        |
| not DE not DE        | not DE            | not DE | not DE            | not DE               | 1.303522 0.010490446 |
| -1.14973 0.00396118  | not DE            | not DE | not DE            | not DE               | -2.15825 4.90E-06    |
| not DE not DE        | not DE            | not DE | not DE            | not DE               | not DE not DE        |
| not DE not DE        | not DE            | not DE | not DE            | not DE               | not DE not DE        |
| not DE not DE        | not DE            | not DE | not DE            | not DE               | not DE not DE        |
| not DE not DE        | not DE            | not DE | not DE            | not DE               | not DE not DE        |
| not DE not DE        | not DE            | not DE | not DE            | not DE               | not DE not DE        |
| not DE not DE        | not DE            | not DE | not DE            | not DE               | not DE not DE        |
| not DE not DE        | not DE            | not DE | not DE            | not DE               | not DE not DE        |
| not DE not DE        | not DE            | not DE | not DE            | not DE               | not DE not DE        |
| 1.495432 0.0059791   | 1.61893 0.038466  | not DE | not DE            | 3.111459 7.26E-27    |                      |
| not DE not DE        | not DE            | not DE | not DE            | not DE               | not DE not DE        |
| not DE not DE        | not DE            | not DE | not DE            | not DE               | -2.23719 3.24E-10    |
| not DE not DE        | not DE            | not DE | not DE            | not DE               | not DE not DE        |
| not DE not DE        | 6.068818 0.000835 | not DE | not DE            | not DE               | not DE not DE        |
| not DE not DE        | not DE            | not DE | not DE            | not DE               | not DE not DE        |
| -1.13404 0.008397264 | not DE            | not DE | not DE            | not DE               | not DE not DE        |
| not DE not DE        | not DE            | not DE | not DE            | not DE               | not DE not DE        |
| not DE not DE        | not DE            | not DE | not DE            | not DE               | not DE not DE        |
| not DE not DE        | not DE            | not DE | not DE            | not DE               | not DE not DE        |
| not DE not DE        | not DE            | not DE | not DE            | not DE               | not DE not DE        |
| not DE not DE        | not DE            | not DE | not DE            | not DE               | not DE not DE        |
| -1.12906 0.000314121 | not DE            | not DE | not DE            | not DE               | -1.68923 0.001983661 |
| not DE not DE        | not DE            | not DE | not DE            | not DE               | not DE not DE        |







|          |             |          |          |          |          |          |             |
|----------|-------------|----------|----------|----------|----------|----------|-------------|
| -1.00319 | 0.007774552 | not DE   | not DE   | not DE   | not DE   | not DE   | not DE      |
| not DE   | not DE      | not DE   | not DE   | not DE   | not DE   | not DE   | not DE      |
| not DE   | not DE      | not DE   | not DE   | not DE   | not DE   | not DE   | not DE      |
| not DE   | not DE      | not DE   | not DE   | not DE   | not DE   | not DE   | not DE      |
| not DE   | not DE      | -1.21251 | 0.040626 | not DE   | not DE   | not DE   | not DE      |
| not DE   | not DE      | not DE   | not DE   | not DE   | not DE   | not DE   | not DE      |
| -1.03045 | 0.001352647 | not DE   | not DE   | not DE   | not DE   | -2.15023 | 3.31E-06    |
| not DE   | not DE      | not DE   | not DE   | not DE   | not DE   | not DE   | not DE      |
| not DE   | not DE      | not DE   | not DE   | not DE   | not DE   | not DE   | not DE      |
| -1.65525 | 0.010179403 | not DE   | not DE   | not DE   | not DE   | -2.80522 | 8.80E-06    |
| not DE   | not DE      | not DE   | not DE   | not DE   | not DE   | not DE   | not DE      |
| not DE   | not DE      | not DE   | not DE   | not DE   | not DE   | not DE   | not DE      |
| not DE   | not DE      | not DE   | not DE   | not DE   | not DE   | not DE   | not DE      |
| not DE   | not DE      | not DE   | not DE   | not DE   | not DE   | 1.304807 | 0.000821669 |
| not DE   | not DE      | not DE   | not DE   | not DE   | not DE   | not DE   | not DE      |
| 1.143725 | 0.000641388 | not DE   | not DE   | not DE   | not DE   | 1.803575 | 1.54E-05    |
| not DE   | not DE      | not DE   | not DE   | not DE   | not DE   | not DE   | not DE      |
| not DE   | not DE      | not DE   | not DE   | not DE   | not DE   | not DE   | not DE      |
| not DE   | not DE      | not DE   | not DE   | not DE   | not DE   | not DE   | not DE      |
| 1.393768 | 0.00211724  | not DE   | not DE   | not DE   | not DE   | 1.869736 | 5.77E-05    |
| not DE   | not DE      | not DE   | not DE   | not DE   | not DE   | not DE   | not DE      |
| not DE   | not DE      | not DE   | not DE   | not DE   | not DE   | not DE   | not DE      |
| not DE   | not DE      | not DE   | not DE   | not DE   | not DE   | not DE   | not DE      |
| not DE   | not DE      | not DE   | not DE   | not DE   | not DE   | not DE   | not DE      |
| not DE   | not DE      | not DE   | not DE   | not DE   | not DE   | not DE   | not DE      |
| not DE   | not DE      | not DE   | not DE   | not DE   | not DE   | 1.391745 | 2.92E-07    |
| not DE   | not DE      | not DE   | not DE   | not DE   | not DE   | not DE   | not DE      |
| not DE   | not DE      | not DE   | not DE   | not DE   | not DE   | not DE   | not DE      |
| not DE   | not DE      | not DE   | not DE   | not DE   | not DE   | not DE   | not DE      |
| not DE   | not DE      | not DE   | not DE   | not DE   | not DE   | not DE   | not DE      |
| not DE   | not DE      | not DE   | not DE   | not DE   | not DE   | not DE   | not DE      |
| not DE   | not DE      | not DE   | not DE   | not DE   | not DE   | not DE   | not DE      |
| not DE   | not DE      | not DE   | not DE   | not DE   | not DE   | not DE   | not DE      |
| 1.249604 | 0.026774053 | not DE   | not DE   | not DE   | not DE   | not DE   | not DE      |
| not DE   | not DE      | not DE   | not DE   | not DE   | not DE   | not DE   | not DE      |
| not DE   | not DE      | not DE   | not DE   | not DE   | not DE   | not DE   | not DE      |
| 1.095185 | 1.14E-05    | not DE   | not DE   | not DE   | not DE   | 1.559976 | 0.001180494 |
| -1.85077 | 0.000211008 | not DE   | not DE   | not DE   | not DE   | -3.87991 | 1.44E-08    |
| not DE   | not DE      | not DE   | not DE   | not DE   | not DE   | not DE   | not DE      |
| not DE   | not DE      | not DE   | not DE   | not DE   | not DE   | not DE   | not DE      |
| not DE   | not DE      | not DE   | not DE   | not DE   | not DE   | not DE   | not DE      |
| 1.830501 | 0.046733994 | 4.048484 | 0.004259 | not DE   | not DE   | 4.13422  | 1.58E-06    |
| 2.855662 | 1.04E-05    | 1.994271 | 0.005636 | not DE   | not DE   | 3.544324 | 5.34E-11    |
| not DE   | not DE      | not DE   | not DE   | not DE   | not DE   | not DE   | not DE      |
| not DE   | not DE      | not DE   | not DE   | not DE   | not DE   | not DE   | not DE      |
| 2.108839 | 5.16E-12    | 1.432436 | 2.56E-06 | 1.007516 | 0.000561 | 3.34368  | 3.35E-42    |
| not DE   | not DE      | not DE   | not DE   | not DE   | not DE   | not DE   | not DE      |
| not DE   | not DE      | not DE   | not DE   | not DE   | not DE   | not DE   | not DE      |
| not DE   | not DE      | not DE   | not DE   | not DE   | not DE   | not DE   | not DE      |
| not DE   | not DE      | 1.355826 | 6.01E-05 | not DE   | not DE   | not DE   | not DE      |
| not DE   | not DE      | not DE   | not DE   | not DE   | not DE   | -1.46895 | 0.001854086 |
| not DE   | not DE      | not DE   | not DE   | not DE   | not DE   | not DE   | not DE      |
| not DE   | not DE      | -1.37317 | 0.019082 | not DE   | not DE   | not DE   | not DE      |
| not DE   | not DE      | not DE   | not DE   | not DE   | not DE   | not DE   | not DE      |
| not DE   | not DE      | not DE   | not DE   | not DE   | not DE   | 1.650583 | 8.85E-08    |



























|                        |                     |                     |                     |               |                        |
|------------------------|---------------------|---------------------|---------------------|---------------|------------------------|
| -1. 58456 0. 020094803 | not DE              | not DE              | not DE              | not DE        | -2. 11854 0. 002109021 |
| not DE not DE          | not DE              | not DE              | not DE              | not DE        | not DE not DE          |
| not DE not DE          | not DE              | not DE              | not DE              | not DE        | not DE not DE          |
| 2. 191746 6. 75E-72    | not DE              | not DE              | not DE              | not DE        | 2. 698281 1. 10E-13    |
| -2. 74458 0. 007037476 | not DE              | not DE              | not DE              | not DE        | -2. 2373 0. 042361914  |
| not DE not DE          | not DE              | not DE              | not DE              | not DE        | not DE not DE          |
| not DE not DE          | not DE              | not DE              | not DE              | not DE        | not DE not DE          |
| not DE not DE          | not DE              | not DE              | not DE              | not DE        | not DE not DE          |
| 1. 107921 7. 28E-06    | not DE              | not DE              | not DE              | not DE        | 1. 12877 3. 47E-08     |
| not DE not DE          | not DE              | not DE              | not DE              | not DE        | -1. 48502 0. 000279609 |
| not DE not DE          | not DE              | not DE              | not DE              | not DE        | not DE not DE          |
| not DE not DE          | not DE              | not DE              | not DE              | not DE        | not DE not DE          |
| not DE not DE          | not DE              | not DE              | not DE              | not DE        | -1. 93957 0. 003909808 |
| not DE not DE          | not DE              | not DE              | not DE              | not DE        | not DE not DE          |
| not DE not DE          | not DE              | not DE              | not DE              | not DE        | not DE not DE          |
| -1. 14685 0. 000994532 | not DE              | not DE              | not DE              | not DE        | not DE not DE          |
| not DE not DE          | not DE              | not DE              | not DE              | not DE        | 1. 346929 0. 049182767 |
| -2. 28542 0. 013238327 | not DE              | not DE              | not DE              | not DE        | -2. 60593 0. 006782163 |
| not DE not DE          | not DE              | not DE              | not DE              | not DE        | not DE not DE          |
| not DE not DE          | not DE              | not DE              | not DE              | not DE        | not DE not DE          |
| not DE not DE          | not DE              | not DE              | not DE              | not DE        | not DE not DE          |
| not DE not DE          | not DE              | not DE              | not DE              | not DE        | not DE not DE          |
| 1. 023548 0. 000900537 | not DE              | not DE              | not DE              | not DE        | not DE not DE          |
| not DE not DE          | not DE              | not DE              | not DE              | not DE        | not DE not DE          |
| not DE not DE          | not DE              | not DE              | not DE              | not DE        | not DE not DE          |
| not DE not DE          | not DE              | not DE              | not DE              | not DE        | not DE not DE          |
| not DE not DE          | not DE              | not DE              | not DE              | not DE        | not DE not DE          |
| not DE not DE          | not DE              | not DE              | not DE              | not DE        | not DE not DE          |
| not DE not DE          | not DE              | not DE              | not DE              | not DE        | not DE not DE          |
| not DE not DE          | not DE              | not DE              | not DE              | not DE        | not DE not DE          |
| -1. 04507 0. 011867317 | not DE              | not DE              | -2. 00096 2. 53E-09 | not DE not DE | 1. 193676 0. 000117498 |
| not DE not DE          | not DE              | not DE              | 1. 202958 0. 034757 | not DE not DE | not DE not DE          |
| not DE not DE          | not DE              | not DE              | not DE not DE       | not DE not DE | 1. 118483 0. 028422043 |
| not DE not DE          | not DE              | not DE              | not DE not DE       | not DE not DE | not DE not DE          |
| not DE not DE          | not DE              | not DE              | not DE not DE       | not DE not DE | not DE not DE          |
| not DE not DE          | not DE              | not DE              | not DE not DE       | not DE not DE | not DE not DE          |
| not DE not DE          | not DE              | not DE              | not DE not DE       | not DE not DE | not DE not DE          |
| 1. 849271 6. 49E-05    | not DE              | not DE              | not DE not DE       | not DE not DE | not DE not DE          |
| not DE not DE          | not DE              | not DE              | not DE not DE       | not DE not DE | 1. 521053 0. 024496459 |
| not DE not DE          | not DE              | not DE              | not DE not DE       | not DE not DE | 1. 530487 0. 000262677 |
| -1. 87281 4. 52E-06    | not DE              | not DE              | not DE not DE       | not DE not DE | not DE not DE          |
| not DE not DE          | not DE              | not DE              | not DE not DE       | not DE not DE | -1. 66783 4. 14E-05    |
| not DE not DE          | 2. 038624 0. 002058 | 2. 085599 0. 003802 | not DE not DE       | not DE not DE | not DE not DE          |
| not DE not DE          | not DE not DE       | not DE not DE       | not DE not DE       | not DE not DE | not DE not DE          |
| not DE not DE          | not DE not DE       | not DE not DE       | not DE not DE       | not DE not DE | not DE not DE          |
| not DE not DE          | not DE not DE       | not DE not DE       | not DE not DE       | not DE not DE | 1. 201413 0. 011031507 |
| not DE not DE          | not DE not DE       | not DE not DE       | not DE not DE       | not DE not DE | not DE not DE          |
| not DE not DE          | not DE not DE       | not DE not DE       | not DE not DE       | not DE not DE | not DE not DE          |
| not DE not DE          | not DE not DE       | not DE not DE       | not DE not DE       | not DE not DE | not DE not DE          |
| not DE not DE          | not DE not DE       | not DE not DE       | not DE not DE       | not DE not DE | not DE not DE          |
| 4. 14704 2. 60E-06     | not DE              | not DE              | not DE not DE       | not DE not DE | 4. 192811 1. 30E-05    |
| not DE not DE          | not DE not DE       | not DE not DE       | not DE not DE       | not DE not DE | not DE not DE          |
| not DE not DE          | not DE not DE       | not DE not DE       | not DE not DE       | not DE not DE | not DE not DE          |
| not DE not DE          | not DE not DE       | not DE not DE       | not DE not DE       | not DE not DE | not DE not DE          |
| not DE not DE          | not DE not DE       | not DE not DE       | not DE not DE       | not DE not DE | not DE not DE          |
| not DE not DE          | not DE not DE       | not DE not DE       | not DE not DE       | not DE not DE | not DE not DE          |
| not DE not DE          | not DE not DE       | not DE not DE       | not DE not DE       | not DE not DE | not DE not DE          |
| not DE not DE          | not DE not DE       | not DE not DE       | not DE not DE       | not DE not DE | not DE not DE          |
| not DE not DE          | not DE not DE       | not DE not DE       | not DE not DE       | not DE not DE | not DE not DE          |
| not DE not DE          | not DE not DE       | not DE not DE       | not DE not DE       | not DE not DE | 1. 118824 0. 043796155 |























|                        |                     |        |        |                        |
|------------------------|---------------------|--------|--------|------------------------|
| 3. 749661 2. 54E-37    | 2. 558555 0. 005608 | not DE | not DE | 5. 053811 2. 57E-60    |
| 2. 121218 5. 30E-06    | not DE not DE       | not DE | not DE | 2. 465996 1. 08E-06    |
| not DE not DE          | not DE not DE       | not DE | not DE | not DE not DE          |
| not DE not DE          | not DE not DE       | not DE | not DE | not DE not DE          |
| not DE not DE          | not DE not DE       | not DE | not DE | not DE not DE          |
| not DE not DE          | -1. 22694 0. 03204  | not DE | not DE | not DE not DE          |
| not DE not DE          | not DE not DE       | not DE | not DE | not DE not DE          |
| not DE not DE          | not DE not DE       | not DE | not DE | not DE not DE          |
| -2. 3132 0. 025917933  | -2. 38629 0. 040135 | not DE | not DE | -3. 34131 0. 014845158 |
| not DE not DE          | not DE not DE       | not DE | not DE | not DE not DE          |
| 2. 236384 0. 005841582 | not DE not DE       | not DE | not DE | not DE not DE          |
| not DE not DE          | not DE not DE       | not DE | not DE | not DE not DE          |
| not DE not DE          | not DE not DE       | not DE | not DE | not DE not DE          |
| not DE not DE          | not DE not DE       | not DE | not DE | not DE not DE          |
| not DE not DE          | not DE not DE       | not DE | not DE | -1. 12912 0. 000730199 |
| not DE not DE          | not DE not DE       | not DE | not DE | not DE not DE          |
| not DE not DE          | not DE not DE       | not DE | not DE | not DE not DE          |
| not DE not DE          | not DE not DE       | not DE | not DE | not DE not DE          |
| not DE not DE          | not DE not DE       | not DE | not DE | not DE not DE          |
| not DE not DE          | not DE not DE       | not DE | not DE | not DE not DE          |
| not DE not DE          | 1. 481605 0. 009924 | not DE | not DE | not DE not DE          |
| not DE not DE          | not DE not DE       | not DE | not DE | not DE not DE          |
| not DE not DE          | not DE not DE       | not DE | not DE | not DE not DE          |
| not DE not DE          | not DE not DE       | not DE | not DE | not DE not DE          |
| 2. 506443 2. 11E-09    | not DE not DE       | not DE | not DE | 3. 33085 4. 10E-21     |
| 2. 385197 7. 96E-08    | 2. 227249 0. 01661  | not DE | not DE | 3. 338139 5. 73E-11    |
| not DE not DE          | not DE not DE       | not DE | not DE | not DE not DE          |
| not DE not DE          | not DE not DE       | not DE | not DE | not DE not DE          |
| not DE not DE          | not DE not DE       | not DE | not DE | not DE not DE          |
| 1. 018601 0. 019680786 | not DE not DE       | not DE | not DE | 1. 368857 9. 60E-05    |
| not DE not DE          | not DE not DE       | not DE | not DE | not DE not DE          |
| not DE not DE          | not DE not DE       | not DE | not DE | not DE not DE          |
| not DE not DE          | not DE not DE       | not DE | not DE | not DE not DE          |
| -1. 1686 0. 002813891  | not DE not DE       | not DE | not DE | not DE not DE          |
| not DE not DE          | not DE not DE       | not DE | not DE | -1. 21763 7. 75E-07    |
| not DE not DE          | not DE not DE       | not DE | not DE | not DE not DE          |
| not DE not DE          | not DE not DE       | not DE | not DE | not DE not DE          |
| not DE not DE          | not DE not DE       | not DE | not DE | not DE not DE          |
| not DE not DE          | not DE not DE       | not DE | not DE | not DE not DE          |
| not DE not DE          | not DE not DE       | not DE | not DE | not DE not DE          |
| not DE not DE          | not DE not DE       | not DE | not DE | not DE not DE          |
| not DE not DE          | not DE not DE       | not DE | not DE | not DE not DE          |
| not DE not DE          | not DE not DE       | not DE | not DE | not DE not DE          |
| not DE not DE          | not DE not DE       | not DE | not DE | not DE not DE          |
| not DE not DE          | not DE not DE       | not DE | not DE | not DE not DE          |
| not DE not DE          | not DE not DE       | not DE | not DE | not DE not DE          |
| not DE not DE          | not DE not DE       | not DE | not DE | not DE not DE          |
| not DE not DE          | not DE not DE       | not DE | not DE | not DE not DE          |
| not DE not DE          | not DE not DE       | not DE | not DE | not DE not DE          |
| not DE not DE          | not DE not DE       | not DE | not DE | not DE not DE          |
| not DE not DE          | not DE not DE       | not DE | not DE | not DE not DE          |
| not DE not DE          | not DE not DE       | not DE | not DE | not DE not DE          |
| not DE not DE          | 7. 58049 1. 50E-05  | not DE | not DE | 7. 792908 5. 45E-08    |
| not DE not DE          | not DE not DE       | not DE | not DE | not DE not DE          |
| 1. 946303 0. 002479658 | not DE not DE       | not DE | not DE | 2. 141024 0. 0028777   |
| not DE not DE          | not DE not DE       | not DE | not DE | not DE not DE          |
| not DE not DE          | not DE not DE       | not DE | not DE | not DE not DE          |
| not DE not DE          | not DE not DE       | not DE | not DE | not DE not DE          |
| not DE not DE          | not DE not DE       | not DE | not DE | not DE not DE          |
| not DE not DE          | not DE not DE       | not DE | not DE | not DE not DE          |



























|           |              |           |           |           |           |           |              |
|-----------|--------------|-----------|-----------|-----------|-----------|-----------|--------------|
| not DE    | not DE       | not DE    | not DE    | not DE    | not DE    | not DE    | not DE       |
| not DE    | not DE       | not DE    | not DE    | not DE    | not DE    | not DE    | not DE       |
| not DE    | not DE       | 3. 067083 | 0. 026169 | not DE    | not DE    | 1. 58058  | 0. 030433263 |
| not DE    | not DE       | not DE    | not DE    | not DE    | not DE    | 2. 189859 | 0. 025773088 |
| not DE    | not DE       | not DE    | not DE    | not DE    | not DE    | not DE    | not DE       |
| not DE    | not DE       | not DE    | not DE    | not DE    | not DE    | not DE    | not DE       |
| not DE    | not DE       | not DE    | not DE    | not DE    | not DE    | not DE    | not DE       |
| not DE    | not DE       | not DE    | not DE    | not DE    | not DE    | not DE    | not DE       |
| not DE    | not DE       | not DE    | not DE    | not DE    | not DE    | not DE    | not DE       |
| 1. 008833 | 0. 036381016 | not DE    | not DE    | not DE    | not DE    | 2. 302493 | 5. 30E-21    |
| not DE    | not DE       | 3. 95738  | 0. 003539 | not DE    | not DE    | not DE    | not DE       |
| not DE    | not DE       | not DE    | not DE    | not DE    | not DE    | not DE    | not DE       |
| not DE    | not DE       | not DE    | not DE    | not DE    | not DE    | not DE    | not DE       |
| not DE    | not DE       | not DE    | not DE    | not DE    | not DE    | not DE    | not DE       |
| not DE    | not DE       | not DE    | not DE    | not DE    | not DE    | not DE    | not DE       |
| not DE    | not DE       | not DE    | not DE    | not DE    | not DE    | not DE    | not DE       |
| not DE    | not DE       | not DE    | not DE    | not DE    | not DE    | not DE    | not DE       |
| not DE    | not DE       | not DE    | not DE    | not DE    | not DE    | not DE    | not DE       |
| not DE    | not DE       | -1. 0369  | 0. 046392 | not DE    | not DE    | not DE    | not DE       |
| not DE    | not DE       | not DE    | not DE    | not DE    | not DE    | not DE    | not DE       |
| not DE    | not DE       | not DE    | not DE    | not DE    | not DE    | not DE    | not DE       |
| not DE    | not DE       | not DE    | not DE    | not DE    | not DE    | 1. 183836 | 0. 00459935  |
| not DE    | not DE       | not DE    | not DE    | not DE    | not DE    | 2. 228568 | 0. 020065    |
| not DE    | not DE       | not DE    | not DE    | not DE    | not DE    | 1. 063142 | 0. 000186088 |
| not DE    | not DE       | not DE    | not DE    | not DE    | not DE    | not DE    | not DE       |
| not DE    | not DE       | not DE    | not DE    | not DE    | not DE    | not DE    | not DE       |
| not DE    | not DE       | not DE    | not DE    | not DE    | not DE    | not DE    | not DE       |
| 4. 283908 | 7. 41E-13    | 2. 913949 | 0. 012822 | not DE    | not DE    | 4. 238268 | 9. 42E-11    |
| not DE    | not DE       | not DE    | not DE    | not DE    | not DE    | not DE    | not DE       |
| not DE    | not DE       | not DE    | not DE    | not DE    | not DE    | not DE    | not DE       |
| not DE    | not DE       | 4. 937714 | 3. 81E-05 | not DE    | not DE    | not DE    | not DE       |
| not DE    | not DE       | not DE    | not DE    | not DE    | not DE    | -1. 41798 | 7. 49E-05    |
| not DE    | not DE       | not DE    | not DE    | not DE    | not DE    | not DE    | not DE       |
| not DE    | not DE       | not DE    | not DE    | not DE    | not DE    | not DE    | not DE       |
| not DE    | not DE       | not DE    | not DE    | not DE    | not DE    | not DE    | not DE       |
| not DE    | not DE       | not DE    | not DE    | not DE    | not DE    | not DE    | not DE       |
| not DE    | not DE       | not DE    | not DE    | not DE    | not DE    | not DE    | not DE       |
| not DE    | not DE       | not DE    | not DE    | not DE    | not DE    | not DE    | not DE       |
| not DE    | not DE       | not DE    | not DE    | not DE    | not DE    | not DE    | not DE       |
| not DE    | not DE       | not DE    | not DE    | not DE    | not DE    | not DE    | not DE       |
| not DE    | not DE       | not DE    | not DE    | not DE    | not DE    | not DE    | not DE       |
| 1. 283454 | 0. 003518557 | not DE    | not DE    | not DE    | not DE    | not DE    | not DE       |
| not DE    | not DE       | not DE    | not DE    | not DE    | not DE    | not DE    | not DE       |
| not DE    | not DE       | not DE    | not DE    | not DE    | not DE    | not DE    | not DE       |
| not DE    | not DE       | not DE    | not DE    | not DE    | not DE    | not DE    | not DE       |
| not DE    | not DE       | not DE    | not DE    | not DE    | not DE    | not DE    | not DE       |
| not DE    | not DE       | not DE    | not DE    | not DE    | not DE    | not DE    | not DE       |
| not DE    | not DE       | not DE    | not DE    | not DE    | not DE    | not DE    | not DE       |
| not DE    | not DE       | not DE    | not DE    | not DE    | not DE    | not DE    | not DE       |
| not DE    | not DE       | not DE    | not DE    | not DE    | not DE    | not DE    | not DE       |
| not DE    | not DE       | not DE    | not DE    | not DE    | not DE    | -2. 35166 | 0. 016906758 |
| -1. 7981  | 8. 84E-07    | not DE    | not DE    | -1. 37125 | 0. 000406 | -2. 46498 | 6. 86E-09    |
| 1. 612424 | 0. 002192692 | not DE    | not DE    | not DE    | not DE    | not DE    | not DE       |
| not DE    | not DE       | not DE    | not DE    | not DE    | not DE    | not DE    | not DE       |
| -1. 32045 | 0. 001109128 | not DE    | not DE    | not DE    | not DE    | -3. 51158 | 2. 18E-13    |









































|          |             |          |          |          |          |          |             |
|----------|-------------|----------|----------|----------|----------|----------|-------------|
| not DE   | not DE      | not DE   | not DE   | not DE   | not DE   | not DE   | not DE      |
| not DE   | not DE      | not DE   | not DE   | not DE   | not DE   | not DE   | not DE      |
| not DE   | not DE      | not DE   | not DE   | not DE   | not DE   | 1.246347 | 0.017922942 |
| not DE   | not DE      | not DE   | not DE   | not DE   | not DE   | not DE   | not DE      |
| not DE   | not DE      | not DE   | not DE   | not DE   | not DE   | not DE   | not DE      |
| not DE   | not DE      | not DE   | not DE   | not DE   | not DE   | not DE   | not DE      |
| not DE   | not DE      | not DE   | not DE   | not DE   | not DE   | not DE   | not DE      |
| 2.27935  | 0.001692689 | not DE   | not DE   | not DE   | not DE   | 2.789923 | 6.62E-10    |
| -2.47756 | 3.62E-08    | not DE   | not DE   | not DE   | not DE   | -3.62172 | 3.96E-13    |
| not DE   | not DE      | not DE   | not DE   | not DE   | not DE   | not DE   | not DE      |
| not DE   | not DE      | not DE   | not DE   | not DE   | not DE   | not DE   | not DE      |
| not DE   | not DE      | 4.308934 | 0.005515 | not DE   | not DE   | not DE   | not DE      |
| not DE   | not DE      | not DE   | not DE   | not DE   | not DE   | not DE   | not DE      |
| not DE   | not DE      | not DE   | not DE   | not DE   | not DE   | not DE   | not DE      |
| 2.529278 | 2.56E-61    | 1.531161 | 0.000497 | not DE   | not DE   | 3.392711 | 9.04E-48    |
| not DE   | not DE      | not DE   | not DE   | not DE   | not DE   | not DE   | not DE      |
| not DE   | not DE      | not DE   | not DE   | not DE   | not DE   | not DE   | not DE      |
| not DE   | not DE      | not DE   | not DE   | not DE   | not DE   | not DE   | not DE      |
| -1.11594 | 0.000605209 | not DE   | not DE   | not DE   | not DE   | -1.94027 | 5.00E-05    |
| not DE   | not DE      | not DE   | not DE   | not DE   | not DE   | not DE   | not DE      |
| not DE   | not DE      | not DE   | not DE   | not DE   | not DE   | not DE   | not DE      |
| not DE   | not DE      | not DE   | not DE   | not DE   | not DE   | not DE   | not DE      |
| not DE   | not DE      | 3.919813 | 0.000255 | not DE   | not DE   | not DE   | not DE      |
| not DE   | not DE      | not DE   | not DE   | not DE   | not DE   | not DE   | not DE      |
| not DE   | not DE      | not DE   | not DE   | not DE   | not DE   | not DE   | not DE      |
| not DE   | not DE      | not DE   | not DE   | not DE   | not DE   | not DE   | not DE      |
| not DE   | not DE      | not DE   | not DE   | not DE   | not DE   | not DE   | not DE      |
| not DE   | not DE      | not DE   | not DE   | not DE   | not DE   | not DE   | not DE      |
| not DE   | not DE      | not DE   | not DE   | not DE   | not DE   | not DE   | not DE      |
| not DE   | not DE      | not DE   | not DE   | not DE   | not DE   | not DE   | not DE      |
| not DE   | not DE      | not DE   | not DE   | not DE   | not DE   | not DE   | not DE      |
| not DE   | not DE      | not DE   | not DE   | not DE   | not DE   | not DE   | not DE      |
| not DE   | not DE      | not DE   | not DE   | not DE   | not DE   | not DE   | not DE      |
| not DE   | not DE      | not DE   | not DE   | not DE   | not DE   | not DE   | not DE      |
| not DE   | not DE      | not DE   | not DE   | not DE   | not DE   | not DE   | not DE      |
| not DE   | not DE      | not DE   | not DE   | not DE   | not DE   | not DE   | not DE      |
| not DE   | not DE      | not DE   | not DE   | not DE   | not DE   | not DE   | not DE      |
| not DE   | not DE      | not DE   | not DE   | not DE   | not DE   | not DE   | not DE      |
| not DE   | not DE      | not DE   | not DE   | not DE   | not DE   | not DE   | not DE      |
| not DE   | not DE      | not DE   | not DE   | not DE   | not DE   | not DE   | not DE      |
| not DE   | not DE      | not DE   | not DE   | not DE   | not DE   | not DE   | not DE      |
| not DE   | not DE      | not DE   | not DE   | not DE   | not DE   | not DE   | not DE      |
| not DE   | not DE      | not DE   | not DE   | not DE   | not DE   | 1.485617 | 7.70E-05    |
| not DE   | not DE      | not DE   | not DE   | not DE   | not DE   | not DE   | not DE      |
| not DE   | not DE      | not DE   | not DE   | not DE   | not DE   | not DE   | not DE      |
| not DE   | not DE      | not DE   | not DE   | not DE   | not DE   | not DE   | not DE      |
| not DE   | not DE      | not DE   | not DE   | not DE   | not DE   | not DE   | not DE      |
| not DE   | not DE      | not DE   | not DE   | not DE   | not DE   | not DE   | not DE      |
| not DE   | not DE      | not DE   | not DE   | not DE   | not DE   | not DE   | not DE      |
| not DE   | not DE      | not DE   | not DE   | not DE   | not DE   | 2.237883 | 0.00098732  |
| -1.14279 | 0.014636397 | not DE   | not DE   | not DE   | not DE   | not DE   | not DE      |
| 2.820207 | 7.05E-10    | 2.261551 | 0.005447 | 1.455736 | 0.024759 | 4.240277 | 6.36E-25    |
| not DE   | not DE      | not DE   | not DE   | not DE   | not DE   | not DE   | not DE      |
| not DE   | not DE      | not DE   | not DE   | not DE   | not DE   | not DE   | not DE      |
| not DE   | not DE      | not DE   | not DE   | not DE   | not DE   | -1.73032 | 0.005494901 |









|          |             |          |          |          |          |          |             |
|----------|-------------|----------|----------|----------|----------|----------|-------------|
| not DE   | not DE      | not DE   | not DE   | not DE   | not DE   | not DE   | not DE      |
| not DE   | not DE      | not DE   | not DE   | not DE   | not DE   | not DE   | not DE      |
| not DE   | not DE      | not DE   | not DE   | not DE   | not DE   | not DE   | not DE      |
| not DE   | not DE      | -2.30295 | 1.78E-12 | not DE   | not DE   | not DE   | not DE      |
| not DE   | not DE      | not DE   | not DE   | not DE   | not DE   | not DE   | not DE      |
| not DE   | not DE      | 2.021112 | 0.021729 | 1.309973 | 0.000375 | 1.701397 | 0.002534158 |
| -1.5305  | 0.000428082 | not DE   | not DE   | not DE   | not DE   | -1.89954 | 0.000824209 |
| not DE   | not DE      | not DE   | not DE   | not DE   | not DE   | not DE   | not DE      |
| not DE   | not DE      | not DE   | not DE   | not DE   | not DE   | not DE   | not DE      |
| not DE   | not DE      | not DE   | not DE   | not DE   | not DE   | not DE   | not DE      |
| not DE   | not DE      | not DE   | not DE   | not DE   | not DE   | not DE   | not DE      |
| not DE   | not DE      | not DE   | not DE   | not DE   | not DE   | not DE   | not DE      |
| 2.832846 | 1.52E-21    | 2.020353 | 6.76E-05 | not DE   | not DE   | 3.40616  | 4.62E-15    |
| -1.75674 | 1.31E-07    | not DE   | not DE   | not DE   | not DE   | -2.34407 | 2.10E-07    |
| not DE   | not DE      | not DE   | not DE   | not DE   | not DE   | not DE   | not DE      |
| 1.778238 | 0.000124034 | 1.504031 | 0.000486 | not DE   | not DE   | 2.058206 | 1.17E-06    |
| not DE   | not DE      | not DE   | not DE   | not DE   | not DE   | not DE   | not DE      |
| not DE   | not DE      | not DE   | not DE   | not DE   | not DE   | not DE   | not DE      |
| not DE   | not DE      | not DE   | not DE   | not DE   | not DE   | not DE   | not DE      |
| not DE   | not DE      | not DE   | not DE   | not DE   | not DE   | not DE   | not DE      |
| not DE   | not DE      | not DE   | not DE   | not DE   | not DE   | not DE   | not DE      |
| not DE   | not DE      | not DE   | not DE   | not DE   | not DE   | not DE   | not DE      |
| not DE   | not DE      | not DE   | not DE   | not DE   | not DE   | not DE   | not DE      |
| 2.662406 | 0.01278039  | not DE   | not DE   | not DE   | not DE   | not DE   | not DE      |
| not DE   | not DE      | not DE   | not DE   | not DE   | not DE   | not DE   | not DE      |
| not DE   | not DE      | not DE   | not DE   | not DE   | not DE   | not DE   | not DE      |
| not DE   | not DE      | not DE   | not DE   | not DE   | not DE   | not DE   | not DE      |
| not DE   | not DE      | not DE   | not DE   | not DE   | not DE   | not DE   | not DE      |
| not DE   | not DE      | not DE   | not DE   | not DE   | not DE   | not DE   | not DE      |
| -2.1964  | 0.002320823 | not DE   | not DE   | not DE   | not DE   | -3.55621 | 3.34E-08    |
| -1.88466 | 0.019962295 | not DE   | not DE   | not DE   | not DE   | -2.86881 | 9.61E-05    |
| not DE   | not DE      | not DE   | not DE   | not DE   | not DE   | not DE   | not DE      |
| not DE   | not DE      | not DE   | not DE   | not DE   | not DE   | not DE   | not DE      |
| not DE   | not DE      | not DE   | not DE   | not DE   | not DE   | 1.193284 | 2.14E-05    |
| -1.18241 | 0.018153837 | not DE   | not DE   | not DE   | not DE   | -2.12278 | 0.00653136  |
| 4.993176 | 8.97E-12    | not DE   | not DE   | not DE   | not DE   | 3.630987 | 0.000141017 |
| not DE   | not DE      | not DE   | not DE   | not DE   | not DE   | 3.038085 | 0.008218969 |
| not DE   | not DE      | not DE   | not DE   | not DE   | not DE   | not DE   | not DE      |
| not DE   | not DE      | not DE   | not DE   | not DE   | not DE   | not DE   | not DE      |
| not DE   | not DE      | not DE   | not DE   | not DE   | not DE   | not DE   | not DE      |
| not DE   | not DE      | not DE   | not DE   | not DE   | not DE   | not DE   | not DE      |
| not DE   | not DE      | not DE   | not DE   | not DE   | not DE   | not DE   | not DE      |
| not DE   | not DE      | not DE   | not DE   | not DE   | not DE   | not DE   | not DE      |
| not DE   | not DE      | not DE   | not DE   | not DE   | not DE   | -1.35864 | 5.77E-06    |
| not DE   | not DE      | not DE   | not DE   | not DE   | not DE   | not DE   | not DE      |
| not DE   | not DE      | not DE   | not DE   | not DE   | not DE   | not DE   | not DE      |
| not DE   | not DE      | not DE   | not DE   | not DE   | not DE   | not DE   | not DE      |
| not DE   | not DE      | not DE   | not DE   | not DE   | not DE   | not DE   | not DE      |
| not DE   | not DE      | not DE   | not DE   | not DE   | not DE   | not DE   | not DE      |
| not DE   | not DE      | not DE   | not DE   | not DE   | not DE   | not DE   | not DE      |
| not DE   | not DE      | not DE   | not DE   | not DE   | not DE   | not DE   | not DE      |
| not DE   | not DE      | not DE   | not DE   | not DE   | not DE   | not DE   | not DE      |
| not DE   | not DE      | -2.12403 | 0.002695 | not DE   | not DE   | not DE   | not DE      |

































|           |              |           |           |           |           |           |              |
|-----------|--------------|-----------|-----------|-----------|-----------|-----------|--------------|
| not DE    | not DE       | not DE    | not DE    | not DE    | not DE    | not DE    | not DE       |
| not DE    | not DE       | not DE    | not DE    | not DE    | not DE    | not DE    | not DE       |
| 1. 14989  | 0. 015060348 | not DE    | not DE    | not DE    | not DE    | 1. 873415 | 4. 90E-06    |
| not DE    | not DE       | not DE    | not DE    | not DE    | not DE    | not DE    | not DE       |
| not DE    | not DE       | not DE    | not DE    | not DE    | not DE    | not DE    | not DE       |
| not DE    | not DE       | not DE    | not DE    | not DE    | not DE    | 1. 155228 | 0. 016013086 |
| not DE    | not DE       | not DE    | not DE    | not DE    | not DE    | not DE    | not DE       |
| 1. 620123 | 6. 59E-06    | not DE    | not DE    | not DE    | not DE    | not DE    | not DE       |
| not DE    | not DE       | not DE    | not DE    | not DE    | not DE    | not DE    | not DE       |
| not DE    | not DE       | not DE    | not DE    | not DE    | not DE    | not DE    | not DE       |
| not DE    | not DE       | not DE    | not DE    | not DE    | not DE    | not DE    | not DE       |
| not DE    | not DE       | not DE    | not DE    | not DE    | not DE    | not DE    | not DE       |
| not DE    | not DE       | not DE    | not DE    | not DE    | not DE    | not DE    | not DE       |
| not DE    | not DE       | not DE    | not DE    | not DE    | not DE    | not DE    | not DE       |
| not DE    | not DE       | not DE    | not DE    | not DE    | not DE    | not DE    | not DE       |
| not DE    | not DE       | not DE    | not DE    | not DE    | not DE    | not DE    | not DE       |
| -1. 13119 | 0. 001650814 | not DE    | not DE    | not DE    | not DE    | -2. 15953 | 2. 67E-08    |
| not DE    | not DE       | not DE    | not DE    | not DE    | not DE    | not DE    | not DE       |
| 1. 31317  | 1. 85E-10    | not DE    | not DE    | not DE    | not DE    | 1. 450343 | 3. 22E-17    |
| not DE    | not DE       | not DE    | not DE    | not DE    | not DE    | -1. 31107 | 0. 02882464  |
| 1. 030093 | 0. 007317223 | not DE    | not DE    | not DE    | not DE    | 1. 38441  | 1. 35E-07    |
| not DE    | not DE       | not DE    | not DE    | not DE    | not DE    | not DE    | not DE       |
| not DE    | not DE       | not DE    | not DE    | not DE    | not DE    | -1. 60206 | 0. 030381418 |
| not DE    | not DE       | not DE    | not DE    | not DE    | not DE    | not DE    | not DE       |
| not DE    | not DE       | not DE    | not DE    | not DE    | not DE    | not DE    | not DE       |
| not DE    | not DE       | 1. 46544  | 0. 036598 | 1. 403215 | 0. 000212 | not DE    | not DE       |
| 1. 216814 | 0. 000326565 | not DE    | not DE    | not DE    | not DE    | 1. 335628 | 0. 017249399 |
| not DE    | not DE       | not DE    | not DE    | not DE    | not DE    | not DE    | not DE       |
| not DE    | not DE       | not DE    | not DE    | not DE    | not DE    | not DE    | not DE       |
| 1. 080991 | 0. 025746834 | 1. 303862 | 0. 018665 | not DE    | not DE    | 1. 559293 | 0. 01050395  |
| not DE    | not DE       | not DE    | not DE    | not DE    | not DE    | not DE    | not DE       |
| not DE    | not DE       | not DE    | not DE    | not DE    | not DE    | not DE    | not DE       |
| not DE    | not DE       | not DE    | not DE    | not DE    | not DE    | not DE    | not DE       |
| not DE    | not DE       | not DE    | not DE    | not DE    | not DE    | not DE    | not DE       |
| not DE    | not DE       | not DE    | not DE    | not DE    | not DE    | not DE    | not DE       |
| not DE    | not DE       | not DE    | not DE    | not DE    | not DE    | not DE    | not DE       |
| not DE    | not DE       | not DE    | not DE    | not DE    | not DE    | not DE    | not DE       |
| not DE    | not DE       | not DE    | not DE    | not DE    | not DE    | not DE    | not DE       |
| not DE    | not DE       | not DE    | not DE    | not DE    | not DE    | not DE    | not DE       |
| not DE    | not DE       | not DE    | not DE    | not DE    | not DE    | not DE    | not DE       |
| 2. 467919 | 4. 27E-09    | 1. 685831 | 0. 001408 | not DE    | not DE    | 3. 517743 | 5. 30E-14    |
| not DE    | not DE       | not DE    | not DE    | not DE    | not DE    | not DE    | not DE       |
| not DE    | not DE       | not DE    | not DE    | not DE    | not DE    | not DE    | not DE       |
| 2. 245489 | 0. 043948483 | not DE    | not DE    | not DE    | not DE    | 3. 406083 | 0. 000444171 |
| not DE    | not DE       | not DE    | not DE    | not DE    | not DE    | -1. 58437 | 4. 57E-08    |
| not DE    | not DE       | not DE    | not DE    | not DE    | not DE    | 1. 063021 | 5. 40E-07    |
| not DE    | not DE       | not DE    | not DE    | not DE    | not DE    | not DE    | not DE       |
| not DE    | not DE       | not DE    | not DE    | not DE    | not DE    | not DE    | not DE       |
| not DE    | not DE       | not DE    | not DE    | not DE    | not DE    | not DE    | not DE       |
| not DE    | not DE       | not DE    | not DE    | not DE    | not DE    | not DE    | not DE       |
| not DE    | not DE       | not DE    | not DE    | not DE    | not DE    | not DE    | not DE       |
| not DE    | not DE       | not DE    | not DE    | not DE    | not DE    | 1. 634892 | 4. 21E-07    |
| not DE    | not DE       | not DE    | not DE    | not DE    | not DE    | not DE    | not DE       |
| not DE    | not DE       | not DE    | not DE    | not DE    | not DE    | not DE    | not DE       |
| not DE    | not DE       | not DE    | not DE    | not DE    | not DE    | not DE    | not DE       |
| not DE    | not DE       | not DE    | not DE    | not DE    | not DE    | not DE    | not DE       |
| not DE    | not DE       | not DE    | not DE    | not DE    | not DE    | not DE    | not DE       |
| not DE    | not DE       | not DE    | not DE    | not DE    | not DE    | not DE    | not DE       |
| not DE    | not DE       | not DE    | not DE    | not DE    | not DE    | 1. 27869  | 0. 004343688 |















|                        |           |           |           |          |           |              |
|------------------------|-----------|-----------|-----------|----------|-----------|--------------|
| 1. 475143 0. 010454953 | not DE    | not DE    | not DE    | not DE   | not DE    | not DE       |
| not DE not DE          | not DE    | not DE    | not DE    | not DE   | not DE    | not DE       |
| not DE not DE          | not DE    | not DE    | not DE    | not DE   | 1. 308095 | 2. 42E-11    |
| not DE not DE          | not DE    | not DE    | 1. 592478 | 0. 04834 | not DE    | not DE       |
| not DE not DE          | not DE    | not DE    | not DE    | not DE   | 2. 518732 | 0. 02488834  |
| not DE not DE          | not DE    | not DE    | not DE    | not DE   | not DE    | not DE       |
| not DE not DE          | not DE    | not DE    | not DE    | not DE   | not DE    | not DE       |
| not DE not DE          | not DE    | not DE    | not DE    | not DE   | not DE    | not DE       |
| not DE not DE          | not DE    | not DE    | not DE    | not DE   | not DE    | not DE       |
| -2. 16197 0. 036477126 | not DE    | not DE    | not DE    | not DE   | -2. 23101 | 0. 048813321 |
| not DE not DE          | not DE    | not DE    | not DE    | not DE   | not DE    | not DE       |
| not DE not DE          | not DE    | not DE    | not DE    | not DE   | not DE    | not DE       |
| -2. 50934 8. 26E-15    | -1. 37579 | 0. 001087 | -1. 23043 | 0. 00174 | -2. 30106 | 3. 32E-10    |
| not DE not DE          | not DE    | not DE    | not DE    | not DE   | not DE    | not DE       |
| not DE not DE          | not DE    | not DE    | not DE    | not DE   | 1. 401432 | 0. 047488935 |
| not DE not DE          | not DE    | not DE    | not DE    | not DE   | not DE    | not DE       |
| not DE not DE          | -2. 00148 | 0. 017377 | not DE    | not DE   | not DE    | not DE       |
| not DE not DE          | not DE    | not DE    | not DE    | not DE   | not DE    | not DE       |
| not DE not DE          | not DE    | not DE    | not DE    | not DE   | not DE    | not DE       |
| not DE not DE          | not DE    | not DE    | not DE    | not DE   | not DE    | not DE       |
| not DE not DE          | not DE    | not DE    | not DE    | not DE   | not DE    | not DE       |
| not DE not DE          | not DE    | not DE    | not DE    | not DE   | not DE    | not DE       |
| not DE not DE          | not DE    | not DE    | not DE    | not DE   | not DE    | not DE       |
| not DE not DE          | not DE    | not DE    | not DE    | not DE   | not DE    | not DE       |
| not DE not DE          | not DE    | not DE    | not DE    | not DE   | not DE    | not DE       |
| not DE not DE          | not DE    | not DE    | not DE    | not DE   | not DE    | not DE       |
| not DE not DE          | not DE    | not DE    | not DE    | not DE   | not DE    | not DE       |
| not DE not DE          | not DE    | not DE    | not DE    | not DE   | not DE    | not DE       |
| not DE not DE          | not DE    | not DE    | not DE    | not DE   | not DE    | not DE       |
| not DE not DE          | not DE    | not DE    | not DE    | not DE   | not DE    | not DE       |
| not DE not DE          | not DE    | not DE    | not DE    | not DE   | not DE    | not DE       |
| not DE not DE          | not DE    | not DE    | not DE    | not DE   | not DE    | not DE       |
| not DE not DE          | not DE    | not DE    | not DE    | not DE   | -2. 25687 | 3. 32E-13    |
| not DE not DE          | not DE    | not DE    | not DE    | not DE   | not DE    | not DE       |
| not DE not DE          | not DE    | not DE    | not DE    | not DE   | -5. 7788  | 0. 001527653 |
| not DE not DE          | not DE    | not DE    | not DE    | not DE   | not DE    | not DE       |
| not DE not DE          | not DE    | not DE    | not DE    | not DE   | not DE    | not DE       |
| not DE not DE          | not DE    | not DE    | not DE    | not DE   | not DE    | not DE       |
| not DE not DE          | not DE    | not DE    | not DE    | not DE   | not DE    | not DE       |
| not DE not DE          | not DE    | not DE    | not DE    | not DE   | not DE    | not DE       |
| not DE not DE          | not DE    | not DE    | not DE    | not DE   | not DE    | not DE       |
| not DE not DE          | not DE    | not DE    | not DE    | not DE   | not DE    | not DE       |
| not DE not DE          | not DE    | not DE    | not DE    | not DE   | not DE    | not DE       |
| not DE not DE          | not DE    | not DE    | not DE    | not DE   | not DE    | not DE       |
| not DE not DE          | not DE    | not DE    | not DE    | not DE   | not DE    | not DE       |
| not DE not DE          | not DE    | not DE    | not DE    | not DE   | not DE    | not DE       |
| not DE not DE          | not DE    | not DE    | not DE    | not DE   | not DE    | not DE       |
| not DE not DE          | not DE    | not DE    | not DE    | not DE   | not DE    | not DE       |
| not DE not DE          | not DE    | not DE    | not DE    | not DE   | not DE    | not DE       |
| not DE not DE          | not DE    | not DE    | not DE    | not DE   | not DE    | not DE       |
| -2. 52328 0. 003662539 | not DE    | not DE    | not DE    | not DE   | -4. 76201 | 1. 70E-05    |
| not DE not DE          | not DE    | not DE    | not DE    | not DE   | not DE    | not DE       |
| not DE not DE          | not DE    | not DE    | not DE    | not DE   | -1. 13221 | 0. 003636084 |
| not DE not DE          | not DE    | not DE    | not DE    | not DE   | not DE    | not DE       |







|          |             |          |          |          |          |          |             |
|----------|-------------|----------|----------|----------|----------|----------|-------------|
| -1.01284 | 0.003775765 | not DE   | not DE   | not DE   | not DE   | -1.40409 | 1.90E-05    |
| not DE   | not DE      | not DE   | not DE   | 1.284958 | 0.016694 | -1.77771 | 0.010228246 |
| not DE   | not DE      | not DE   | not DE   | not DE   | not DE   | not DE   | not DE      |
| 4.854281 | 1.27E-43    | 3.683277 | 0.001909 | not DE   | not DE   | 5.405824 | 7.00E-43    |
| not DE   | not DE      | not DE   | not DE   | not DE   | not DE   | not DE   | not DE      |
| not DE   | not DE      | not DE   | not DE   | not DE   | not DE   | not DE   | not DE      |
| not DE   | not DE      | not DE   | not DE   | not DE   | not DE   | not DE   | not DE      |
| not DE   | not DE      | not DE   | not DE   | not DE   | not DE   | not DE   | not DE      |
| 2.204485 | 0.006764978 | not DE   | not DE   | not DE   | not DE   | 1.97848  | 0.030002245 |
| not DE   | not DE      | -2.56892 | 0.040626 | not DE   | not DE   | not DE   | not DE      |
| not DE   | not DE      | not DE   | not DE   | not DE   | not DE   | not DE   | not DE      |
| 2.299534 | 0.014982875 | not DE   | not DE   | 2.492005 | 0.01393  | not DE   | not DE      |
| not DE   | not DE      | not DE   | not DE   | not DE   | not DE   | not DE   | not DE      |
| not DE   | not DE      | not DE   | not DE   | not DE   | not DE   | not DE   | not DE      |
| not DE   | not DE      | not DE   | not DE   | not DE   | not DE   | not DE   | not DE      |
| not DE   | not DE      | not DE   | not DE   | not DE   | not DE   | not DE   | not DE      |
| not DE   | not DE      | not DE   | not DE   | not DE   | not DE   | not DE   | not DE      |
| not DE   | not DE      | not DE   | not DE   | not DE   | not DE   | not DE   | not DE      |
| not DE   | not DE      | not DE   | not DE   | not DE   | not DE   | not DE   | not DE      |
| not DE   | not DE      | not DE   | not DE   | not DE   | not DE   | not DE   | not DE      |
| not DE   | not DE      | not DE   | not DE   | not DE   | not DE   | not DE   | not DE      |
| not DE   | not DE      | not DE   | not DE   | not DE   | not DE   | not DE   | not DE      |
| not DE   | not DE      | not DE   | not DE   | not DE   | not DE   | not DE   | not DE      |
| not DE   | not DE      | not DE   | not DE   | not DE   | not DE   | not DE   | not DE      |
| 1.676604 | 0.00187899  | not DE   | not DE   | not DE   | not DE   | 1.739933 | 0.000472953 |
| not DE   | not DE      | not DE   | not DE   | not DE   | not DE   | not DE   | not DE      |
| not DE   | not DE      | not DE   | not DE   | not DE   | not DE   | not DE   | not DE      |
| not DE   | not DE      | not DE   | not DE   | not DE   | not DE   | not DE   | not DE      |
| not DE   | not DE      | not DE   | not DE   | not DE   | not DE   | not DE   | not DE      |
| not DE   | not DE      | not DE   | not DE   | not DE   | not DE   | not DE   | not DE      |
| not DE   | not DE      | not DE   | not DE   | not DE   | not DE   | not DE   | not DE      |
| not DE   | not DE      | not DE   | not DE   | not DE   | not DE   | not DE   | not DE      |
| not DE   | not DE      | not DE   | not DE   | not DE   | not DE   | not DE   | not DE      |
| -1.09236 | 0.038016661 | not DE   | not DE   | not DE   | not DE   | -1.79359 | 0.011569529 |
| not DE   | not DE      | not DE   | not DE   | not DE   | not DE   | not DE   | not DE      |
| not DE   | not DE      | not DE   | not DE   | not DE   | not DE   | not DE   | not DE      |
| not DE   | not DE      | not DE   | not DE   | not DE   | not DE   | not DE   | not DE      |
| not DE   | not DE      | not DE   | not DE   | not DE   | not DE   | not DE   | not DE      |
| not DE   | not DE      | not DE   | not DE   | not DE   | not DE   | not DE   | not DE      |
| not DE   | not DE      | not DE   | not DE   | not DE   | not DE   | not DE   | not DE      |
| not DE   | not DE      | not DE   | not DE   | not DE   | not DE   | not DE   | not DE      |
| not DE   | not DE      | not DE   | not DE   | not DE   | not DE   | not DE   | not DE      |
| not DE   | not DE      | not DE   | not DE   | not DE   | not DE   | not DE   | not DE      |
| not DE   | not DE      | not DE   | not DE   | not DE   | not DE   | not DE   | not DE      |
| not DE   | not DE      | not DE   | not DE   | not DE   | not DE   | not DE   | not DE      |
| not DE   | not DE      | not DE   | not DE   | not DE   | not DE   | not DE   | not DE      |
| not DE   | not DE      | not DE   | not DE   | not DE   | not DE   | not DE   | not DE      |
| 4.146554 | 8.69E-29    | 3.576777 | 2.02E-06 | not DE   | not DE   | 4.755372 | 1.71E-23    |
| 1.917016 | 0.000107371 | 1.323212 | 0.047424 | not DE   | not DE   | 2.234242 | 1.56E-06    |
| not DE   | not DE      | not DE   | not DE   | not DE   | not DE   | -2.50941 | 0.003840484 |
| not DE   | not DE      | not DE   | not DE   | not DE   | not DE   | not DE   | not DE      |
| not DE   | not DE      | not DE   | not DE   | not DE   | not DE   | not DE   | not DE      |
| not DE   | not DE      | not DE   | not DE   | not DE   | not DE   | not DE   | not DE      |
| not DE   | not DE      | not DE   | not DE   | not DE   | not DE   | not DE   | not DE      |
| 2.796778 | 5.67E-18    | not DE   | not DE   | not DE   | not DE   | 1.653956 | 1.38E-07    |
| not DE   | not DE      | 1.172504 | 0.016069 | not DE   | not DE   | 1.058674 | 8.08E-05    |
| not DE   | not DE      | not DE   | not DE   | not DE   | not DE   | not DE   | not DE      |
| not DE   | not DE      | not DE   | not DE   | not DE   | not DE   | not DE   | not DE      |
| not DE   | not DE      | not DE   | not DE   | not DE   | not DE   | not DE   | not DE      |
| not DE   | not DE      | not DE   | not DE   | not DE   | not DE   | not DE   | not DE      |
| not DE   | not DE      | not DE   | not DE   | not DE   | not DE   | not DE   | not DE      |
| -1.36357 | 0.013940263 | not DE   | not DE   | not DE   | not DE   | -1.30587 | 0.029445996 |































|          |             |          |          |          |          |          |             |
|----------|-------------|----------|----------|----------|----------|----------|-------------|
| not DE   | not DE      | not DE   | not DE   | not DE   | not DE   | not DE   | not DE      |
| not DE   | not DE      | not DE   | not DE   | not DE   | not DE   | not DE   | not DE      |
| not DE   | not DE      | not DE   | not DE   | not DE   | not DE   | not DE   | not DE      |
| not DE   | not DE      | not DE   | not DE   | not DE   | not DE   | not DE   | not DE      |
| not DE   | not DE      | not DE   | not DE   | not DE   | not DE   | not DE   | not DE      |
| not DE   | not DE      | not DE   | not DE   | not DE   | not DE   | not DE   | not DE      |
| not DE   | not DE      | not DE   | not DE   | not DE   | not DE   | not DE   | not DE      |
| not DE   | not DE      | not DE   | not DE   | not DE   | not DE   | not DE   | not DE      |
| not DE   | not DE      | -1.21578 | 0.023421 | not DE   | not DE   | not DE   | not DE      |
| not DE   | not DE      | not DE   | not DE   | not DE   | not DE   | not DE   | not DE      |
| not DE   | not DE      | not DE   | not DE   | not DE   | not DE   | not DE   | not DE      |
| 1.632767 | 7.45E-09    | not DE   | not DE   | not DE   | not DE   | 2.184547 | 4.22E-08    |
| not DE   | not DE      | -2.39512 | 3.15E-11 | not DE   | not DE   | not DE   | not DE      |
| not DE   | not DE      | not DE   | not DE   | not DE   | not DE   | not DE   | not DE      |
| 1.436961 | 3.80E-05    | not DE   | not DE   | not DE   | not DE   | 1.129324 | 0.000869437 |
| 1.337333 | 0.019333074 | not DE   | not DE   | not DE   | not DE   | 1.557308 | 0.008082438 |
| not DE   | not DE      | not DE   | not DE   | not DE   | not DE   | not DE   | not DE      |
| not DE   | not DE      | not DE   | not DE   | not DE   | not DE   | not DE   | not DE      |
| not DE   | not DE      | not DE   | not DE   | not DE   | not DE   | not DE   | not DE      |
| not DE   | not DE      | not DE   | not DE   | not DE   | not DE   | not DE   | not DE      |
| not DE   | not DE      | not DE   | not DE   | not DE   | not DE   | not DE   | not DE      |
| not DE   | not DE      | not DE   | not DE   | not DE   | not DE   | not DE   | not DE      |
| not DE   | not DE      | not DE   | not DE   | not DE   | not DE   | not DE   | not DE      |
| not DE   | not DE      | not DE   | not DE   | not DE   | not DE   | not DE   | not DE      |
| not DE   | not DE      | not DE   | not DE   | not DE   | not DE   | not DE   | not DE      |
| not DE   | not DE      | not DE   | not DE   | not DE   | not DE   | -1.53645 | 6.15E-05    |
| 1.702743 | 0.004839257 | not DE   | not DE   | 1.308915 | 0.032238 | 2.149404 | 0.003865615 |
| not DE   | not DE      | not DE   | not DE   | not DE   | not DE   | -1.56214 | 0.015878046 |
| not DE   | not DE      | not DE   | not DE   | not DE   | not DE   | not DE   | not DE      |
| not DE   | not DE      | not DE   | not DE   | not DE   | not DE   | not DE   | not DE      |
| not DE   | not DE      | not DE   | not DE   | not DE   | not DE   | not DE   | not DE      |
| not DE   | not DE      | not DE   | not DE   | not DE   | not DE   | not DE   | not DE      |
| not DE   | not DE      | not DE   | not DE   | not DE   | not DE   | not DE   | not DE      |
| -2.49732 | 0.00825756  | not DE   | not DE   | not DE   | not DE   | -4.1652  | 1.59E-05    |
| not DE   | not DE      | not DE   | not DE   | not DE   | not DE   | not DE   | not DE      |
| not DE   | not DE      | not DE   | not DE   | not DE   | not DE   | not DE   | not DE      |
| not DE   | not DE      | not DE   | not DE   | not DE   | not DE   | -1.82576 | 0.00012179  |
| -1.60554 | 7.73E-07    | not DE   | not DE   | -1.47538 | 2.30E-08 | -1.02014 | 0.000546452 |
| 1.372071 | 4.20E-05    | not DE   | not DE   | not DE   | not DE   | not DE   | not DE      |
| not DE   | not DE      | not DE   | not DE   | not DE   | not DE   | not DE   | not DE      |
| not DE   | not DE      | not DE   | not DE   | not DE   | not DE   | -1.20791 | 4.71E-05    |
| not DE   | not DE      | not DE   | not DE   | not DE   | not DE   | 2.419578 | 1.45E-05    |
| not DE   | not DE      | not DE   | not DE   | not DE   | not DE   | 1.056422 | 0.000329459 |
| not DE   | not DE      | not DE   | not DE   | not DE   | not DE   | not DE   | not DE      |
| not DE   | not DE      | not DE   | not DE   | not DE   | not DE   | not DE   | not DE      |
| not DE   | not DE      | not DE   | not DE   | not DE   | not DE   | not DE   | not DE      |
| not DE   | not DE      | not DE   | not DE   | not DE   | not DE   | not DE   | not DE      |
| not DE   | not DE      | not DE   | not DE   | not DE   | not DE   | not DE   | not DE      |
| not DE   | not DE      | not DE   | not DE   | not DE   | not DE   | not DE   | not DE      |
| not DE   | not DE      | not DE   | not DE   | not DE   | not DE   | not DE   | not DE      |
| not DE   | not DE      | not DE   | not DE   | not DE   | not DE   | not DE   | not DE      |
| not DE   | not DE      | not DE   | not DE   | not DE   | not DE   | not DE   | not DE      |
| not DE   | not DE      | not DE   | not DE   | -1.06995 | 0.032397 | not DE   | not DE      |









|          |             |          |          |          |          |          |             |
|----------|-------------|----------|----------|----------|----------|----------|-------------|
| not DE   | not DE      | not DE   | not DE   | 1.955074 | 0.015727 | not DE   | not DE      |
| not DE   | not DE      | not DE   | not DE   | not DE   | not DE   | not DE   | not DE      |
| not DE   | not DE      | not DE   | not DE   | not DE   | not DE   | not DE   | not DE      |
| not DE   | not DE      | not DE   | not DE   | not DE   | not DE   | not DE   | not DE      |
| not DE   | not DE      | not DE   | not DE   | not DE   | not DE   | not DE   | not DE      |
| not DE   | not DE      | not DE   | not DE   | not DE   | not DE   | not DE   | not DE      |
| not DE   | not DE      | not DE   | not DE   | not DE   | not DE   | not DE   | not DE      |
| 3.811043 | 0.002151194 | 3.407502 | 0.000123 | not DE   | not DE   | not DE   | not DE      |
| not DE   | not DE      | not DE   | not DE   | not DE   | not DE   | not DE   | not DE      |
| not DE   | not DE      | not DE   | not DE   | not DE   | not DE   | not DE   | not DE      |
| not DE   | not DE      | not DE   | not DE   | not DE   | not DE   | not DE   | not DE      |
| not DE   | not DE      | not DE   | not DE   | not DE   | not DE   | not DE   | not DE      |
| not DE   | not DE      | not DE   | not DE   | not DE   | not DE   | not DE   | not DE      |
| 1.603278 | 1.07E-08    | not DE   | not DE   | not DE   | not DE   | 2.114418 | 1.05E-12    |
| not DE   | not DE      | -1.64384 | 2.72E-05 | not DE   | not DE   | not DE   | not DE      |
| not DE   | not DE      | 1.211047 | 0.033835 | not DE   | not DE   | not DE   | not DE      |
| not DE   | not DE      | not DE   | not DE   | not DE   | not DE   | not DE   | not DE      |
| not DE   | not DE      | not DE   | not DE   | not DE   | not DE   | not DE   | not DE      |
| -1.55093 | 1.95E-08    | -1.67086 | 2.98E-08 | not DE   | not DE   | -1.13625 | 0.003885288 |
| not DE   | not DE      | not DE   | not DE   | not DE   | not DE   | not DE   | not DE      |
| not DE   | not DE      | not DE   | not DE   | not DE   | not DE   | not DE   | not DE      |
| not DE   | not DE      | not DE   | not DE   | not DE   | not DE   | not DE   | not DE      |
| not DE   | not DE      | not DE   | not DE   | not DE   | not DE   | not DE   | not DE      |
| not DE   | not DE      | not DE   | not DE   | not DE   | not DE   | not DE   | not DE      |
| not DE   | not DE      | not DE   | not DE   | not DE   | not DE   | not DE   | not DE      |
| not DE   | not DE      | not DE   | not DE   | not DE   | not DE   | not DE   | not DE      |
| not DE   | not DE      | not DE   | not DE   | not DE   | not DE   | not DE   | not DE      |
| not DE   | not DE      | not DE   | not DE   | not DE   | not DE   | not DE   | not DE      |
| not DE   | not DE      | not DE   | not DE   | not DE   | not DE   | not DE   | not DE      |
| not DE   | not DE      | not DE   | not DE   | not DE   | not DE   | not DE   | not DE      |
| -1.12597 | 0.024403291 | not DE   | not DE   | not DE   | not DE   | -1.07691 | 0.02414063  |
| not DE   | not DE      | not DE   | not DE   | not DE   | not DE   | not DE   | not DE      |
| not DE   | not DE      | not DE   | not DE   | not DE   | not DE   | not DE   | not DE      |
| not DE   | not DE      | 5.555116 | 0.001381 | not DE   | not DE   | not DE   | not DE      |
| not DE   | not DE      | -4.45236 | 0.000126 | not DE   | not DE   | not DE   | not DE      |
| not DE   | not DE      | not DE   | not DE   | not DE   | not DE   | not DE   | not DE      |
| not DE   | not DE      | not DE   | not DE   | not DE   | not DE   | not DE   | not DE      |
| not DE   | not DE      | not DE   | not DE   | not DE   | not DE   | not DE   | not DE      |
| not DE   | not DE      | not DE   | not DE   | not DE   | not DE   | not DE   | not DE      |
| not DE   | not DE      | not DE   | not DE   | not DE   | not DE   | not DE   | not DE      |
| not DE   | not DE      | not DE   | not DE   | not DE   | not DE   | not DE   | not DE      |
| not DE   | not DE      | not DE   | not DE   | not DE   | not DE   | not DE   | not DE      |
| not DE   | not DE      | not DE   | not DE   | not DE   | not DE   | not DE   | not DE      |
| 4.057507 | 0.008270266 | not DE   | not DE   | not DE   | not DE   | 3.45675  | 0.018646547 |
| not DE   | not DE      | not DE   | not DE   | not DE   | not DE   | not DE   | not DE      |
| not DE   | not DE      | not DE   | not DE   | not DE   | not DE   | 1.423682 | 0.009784109 |
| not DE   | not DE      | not DE   | not DE   | not DE   | not DE   | not DE   | not DE      |
| not DE   | not DE      | not DE   | not DE   | not DE   | not DE   | not DE   | not DE      |
| not DE   | not DE      | not DE   | not DE   | not DE   | not DE   | not DE   | not DE      |
| not DE   | not DE      | 5.57655  | 0.001649 | not DE   | not DE   | not DE   | not DE      |
| not DE   | not DE      | not DE   | not DE   | not DE   | not DE   | not DE   | not DE      |
| -1.16149 | 0.016948321 | not DE   | not DE   | not DE   | not DE   | not DE   | not DE      |
| not DE   | not DE      | not DE   | not DE   | not DE   | not DE   | not DE   | not DE      |
| not DE   | not DE      | not DE   | not DE   | not DE   | not DE   | not DE   | not DE      |
| not DE   | not DE      | not DE   | not DE   | not DE   | not DE   | not DE   | not DE      |
| -2.86806 | 0.035514507 | not DE   | not DE   | not DE   | not DE   | -2.98451 | 0.017417485 |











|           |              |           |           |           |           |           |              |
|-----------|--------------|-----------|-----------|-----------|-----------|-----------|--------------|
| 2. 207908 | 0. 036551605 | not DE    | not DE    | not DE    | not DE    | not DE    | not DE       |
| not DE    | not DE       | not DE    | not DE    | not DE    | not DE    | 1. 190075 | 7. 88E-10    |
| not DE    | not DE       | not DE    | not DE    | not DE    | not DE    | not DE    | not DE       |
| not DE    | not DE       | not DE    | not DE    | not DE    | not DE    | not DE    | not DE       |
| not DE    | not DE       | not DE    | not DE    | not DE    | not DE    | 1. 031118 | 0. 021820731 |
| not DE    | not DE       | not DE    | not DE    | not DE    | not DE    | not DE    | not DE       |
| not DE    | not DE       | not DE    | not DE    | not DE    | not DE    | not DE    | not DE       |
| 1. 096125 | 4. 52E-07    | not DE    | not DE    | not DE    | not DE    | 1. 410032 | 6. 04E-08    |
| not DE    | not DE       | not DE    | not DE    | not DE    | not DE    | not DE    | not DE       |
| not DE    | not DE       | not DE    | not DE    | not DE    | not DE    | not DE    | not DE       |
| not DE    | not DE       | not DE    | not DE    | not DE    | not DE    | not DE    | not DE       |
| not DE    | not DE       | not DE    | not DE    | not DE    | not DE    | not DE    | not DE       |
| not DE    | not DE       | not DE    | not DE    | not DE    | not DE    | not DE    | not DE       |
| not DE    | not DE       | not DE    | not DE    | not DE    | not DE    | not DE    | not DE       |
| not DE    | not DE       | not DE    | not DE    | not DE    | not DE    | not DE    | not DE       |
| not DE    | not DE       | not DE    | not DE    | not DE    | not DE    | not DE    | not DE       |
| 1. 292227 | 0. 005587082 | not DE    | not DE    | not DE    | not DE    | 1. 882872 | 5. 87E-05    |
| not DE    | not DE       | not DE    | not DE    | not DE    | not DE    | not DE    | not DE       |
| not DE    | not DE       | not DE    | not DE    | not DE    | not DE    | not DE    | not DE       |
| not DE    | not DE       | not DE    | not DE    | not DE    | not DE    | not DE    | not DE       |
| not DE    | not DE       | not DE    | not DE    | not DE    | not DE    | not DE    | not DE       |
| not DE    | not DE       | not DE    | not DE    | not DE    | not DE    | not DE    | not DE       |
| not DE    | not DE       | not DE    | not DE    | not DE    | not DE    | not DE    | not DE       |
| not DE    | not DE       | not DE    | not DE    | not DE    | not DE    | not DE    | not DE       |
| not DE    | not DE       | not DE    | not DE    | not DE    | not DE    | not DE    | not DE       |
| not DE    | not DE       | not DE    | not DE    | not DE    | not DE    | not DE    | not DE       |
| not DE    | not DE       | not DE    | not DE    | not DE    | not DE    | 1. 309767 | 3. 94E-10    |
| not DE    | not DE       | not DE    | not DE    | not DE    | not DE    | not DE    | not DE       |
| not DE    | not DE       | not DE    | not DE    | not DE    | not DE    | not DE    | not DE       |
| not DE    | not DE       | not DE    | not DE    | not DE    | not DE    | not DE    | not DE       |
| not DE    | not DE       | not DE    | not DE    | not DE    | not DE    | not DE    | not DE       |
| not DE    | not DE       | not DE    | not DE    | not DE    | not DE    | not DE    | not DE       |
| not DE    | not DE       | not DE    | not DE    | not DE    | not DE    | not DE    | not DE       |
| -7. 83092 | 9. 95E-64    | -2. 17951 | 7. 46E-07 | -2. 55759 | 1. 58E-13 | -7. 10504 | 3. 38E-11    |
| not DE    | not DE       | 1. 684883 | 0. 037338 | not DE    | not DE    | not DE    | not DE       |
| not DE    | not DE       | not DE    | not DE    | not DE    | not DE    | 1. 204124 | 0. 011834345 |
| not DE    | not DE       | not DE    | not DE    | not DE    | not DE    | not DE    | not DE       |
| not DE    | not DE       | not DE    | not DE    | not DE    | not DE    | not DE    | not DE       |
| not DE    | not DE       | not DE    | not DE    | not DE    | not DE    | not DE    | not DE       |
| not DE    | not DE       | not DE    | not DE    | not DE    | not DE    | not DE    | not DE       |
| not DE    | not DE       | not DE    | not DE    | not DE    | not DE    | 1. 015752 | 0. 000481015 |
| not DE    | not DE       | not DE    | not DE    | not DE    | not DE    | not DE    | not DE       |
| not DE    | not DE       | not DE    | not DE    | not DE    | not DE    | not DE    | not DE       |
| not DE    | not DE       | not DE    | not DE    | not DE    | not DE    | not DE    | not DE       |
| not DE    | not DE       | not DE    | not DE    | not DE    | not DE    | not DE    | not DE       |
| not DE    | not DE       | not DE    | not DE    | not DE    | not DE    | not DE    | not DE       |
| not DE    | not DE       | not DE    | not DE    | not DE    | not DE    | not DE    | not DE       |
| not DE    | not DE       | not DE    | not DE    | not DE    | not DE    | -2. 05023 | 0. 006450029 |
| not DE    | not DE       | not DE    | not DE    | not DE    | not DE    | -1. 09077 | 0. 047677698 |
| not DE    | not DE       | not DE    | not DE    | not DE    | not DE    | -1. 02718 | 0. 043916147 |
| not DE    | not DE       | not DE    | not DE    | not DE    | not DE    | not DE    | not DE       |
| not DE    | not DE       | not DE    | not DE    | not DE    | not DE    | not DE    | not DE       |
| not DE    | not DE       | not DE    | not DE    | not DE    | not DE    | not DE    | not DE       |
| not DE    | not DE       | not DE    | not DE    | 1. 183865 | 0. 021084 | not DE    | not DE       |
| not DE    | not DE       | not DE    | not DE    | not DE    | not DE    | not DE    | not DE       |
| not DE    | not DE       | not DE    | not DE    | not DE    | not DE    | not DE    | not DE       |
| not DE    | not DE       | not DE    | not DE    | not DE    | not DE    | not DE    | not DE       |
| not DE    | not DE       | not DE    | not DE    | not DE    | not DE    | not DE    | not DE       |
| not DE    | not DE       | not DE    | not DE    | not DE    | not DE    | not DE    | not DE       |
| not DE    | not DE       | not DE    | not DE    | not DE    | not DE    | 1. 424576 | 3. 81E-10    |





|          |             |          |          |          |          |          |             |
|----------|-------------|----------|----------|----------|----------|----------|-------------|
| not DE   | not DE      | not DE   | not DE   | not DE   | not DE   | not DE   | not DE      |
| not DE   | not DE      | not DE   | not DE   | 1.36092  | 0.000419 | not DE   | not DE      |
| not DE   | not DE      | not DE   | not DE   | not DE   | not DE   | not DE   | not DE      |
| not DE   | not DE      | not DE   | not DE   | not DE   | not DE   | not DE   | not DE      |
| not DE   | not DE      | not DE   | not DE   | not DE   | not DE   | not DE   | not DE      |
| not DE   | not DE      | not DE   | not DE   | not DE   | not DE   | not DE   | not DE      |
| not DE   | not DE      | not DE   | not DE   | not DE   | not DE   | not DE   | not DE      |
| -1.77085 | 1.43E-07    | not DE   | not DE   | not DE   | not DE   | -1.55488 | 0.000155965 |
| not DE   | not DE      | not DE   | not DE   | not DE   | not DE   | not DE   | not DE      |
| not DE   | not DE      | not DE   | not DE   | not DE   | not DE   | -4.07006 | 0.00323588  |
| not DE   | not DE      | not DE   | not DE   | not DE   | not DE   | not DE   | not DE      |
| not DE   | not DE      | not DE   | not DE   | not DE   | not DE   | 1.073586 | 0.003899692 |
| not DE   | not DE      | not DE   | not DE   | not DE   | not DE   | not DE   | not DE      |
| not DE   | not DE      | not DE   | not DE   | not DE   | not DE   | not DE   | not DE      |
| not DE   | not DE      | not DE   | not DE   | not DE   | not DE   | not DE   | not DE      |
| not DE   | not DE      | not DE   | not DE   | not DE   | not DE   | not DE   | not DE      |
| not DE   | not DE      | not DE   | not DE   | not DE   | not DE   | not DE   | not DE      |
| not DE   | not DE      | not DE   | not DE   | not DE   | not DE   | not DE   | not DE      |
| not DE   | not DE      | not DE   | not DE   | not DE   | not DE   | not DE   | not DE      |
| not DE   | not DE      | not DE   | not DE   | not DE   | not DE   | not DE   | not DE      |
| -1.17276 | 0.000154672 | not DE   | not DE   | not DE   | not DE   | not DE   | not DE      |
| not DE   | not DE      | not DE   | not DE   | 1.077741 | 0.001781 | not DE   | not DE      |
| not DE   | not DE      | not DE   | not DE   | not DE   | not DE   | not DE   | not DE      |
| not DE   | not DE      | not DE   | not DE   | not DE   | not DE   | not DE   | not DE      |
| not DE   | not DE      | not DE   | not DE   | not DE   | not DE   | 1.457754 | 0.004860201 |
| not DE   | not DE      | not DE   | not DE   | not DE   | not DE   | not DE   | not DE      |
| not DE   | not DE      | 2.864679 | 0.015618 | not DE   | not DE   | not DE   | not DE      |
| not DE   | not DE      | not DE   | not DE   | not DE   | not DE   | not DE   | not DE      |
| not DE   | not DE      | not DE   | not DE   | not DE   | not DE   | not DE   | not DE      |
| not DE   | not DE      | not DE   | not DE   | not DE   | not DE   | not DE   | not DE      |
| not DE   | not DE      | not DE   | not DE   | not DE   | not DE   | not DE   | not DE      |
| not DE   | not DE      | not DE   | not DE   | not DE   | not DE   | 1.710866 | 1.95E-08    |
| not DE   | not DE      | not DE   | not DE   | not DE   | not DE   | not DE   | not DE      |
| not DE   | not DE      | not DE   | not DE   | not DE   | not DE   | not DE   | not DE      |
| not DE   | not DE      | not DE   | not DE   | not DE   | not DE   | not DE   | not DE      |
| not DE   | not DE      | not DE   | not DE   | not DE   | not DE   | -1.36365 | 0.040087037 |
| not DE   | not DE      | not DE   | not DE   | not DE   | not DE   | not DE   | not DE      |
| not DE   | not DE      | 3.277347 | 0.012262 | not DE   | not DE   | not DE   | not DE      |
| not DE   | not DE      | not DE   | not DE   | not DE   | not DE   | not DE   | not DE      |
| not DE   | not DE      | not DE   | not DE   | not DE   | not DE   | not DE   | not DE      |
| 1.370949 | 0.000164136 | not DE   | not DE   | not DE   | not DE   | 1.462286 | 0.000892711 |
| not DE   | not DE      | not DE   | not DE   | not DE   | not DE   | not DE   | not DE      |
| not DE   | not DE      | not DE   | not DE   | not DE   | not DE   | not DE   | not DE      |
| not DE   | not DE      | not DE   | not DE   | not DE   | not DE   | not DE   | not DE      |
| not DE   | not DE      | not DE   | not DE   | not DE   | not DE   | not DE   | not DE      |
| -1.35599 | 0.048192885 | not DE   | not DE   | not DE   | not DE   | not DE   | not DE      |
| not DE   | not DE      | not DE   | not DE   | not DE   | not DE   | not DE   | not DE      |
| not DE   | not DE      | not DE   | not DE   | not DE   | not DE   | not DE   | not DE      |
| not DE   | not DE      | not DE   | not DE   | not DE   | not DE   | not DE   | not DE      |
| not DE   | not DE      | not DE   | not DE   | not DE   | not DE   | not DE   | not DE      |
| not DE   | not DE      | not DE   | not DE   | not DE   | not DE   | not DE   | not DE      |
| not DE   | not DE      | not DE   | not DE   | not DE   | not DE   | not DE   | not DE      |
| not DE   | not DE      | not DE   | not DE   | not DE   | not DE   | not DE   | not DE      |
| not DE   | not DE      | not DE   | not DE   | not DE   | not DE   | not DE   | not DE      |
| 2.417711 | 5.90E-08    | not DE   | not DE   | not DE   | not DE   | 3.089349 | 3.58E-11    |



|          |             |          |          |          |          |          |             |
|----------|-------------|----------|----------|----------|----------|----------|-------------|
| not DE   | not DE      | not DE   | not DE   | not DE   | not DE   | not DE   | not DE      |
| not DE   | not DE      | not DE   | not DE   | not DE   | not DE   | -2.76437 | 0.000377705 |
| not DE   | not DE      | not DE   | not DE   | not DE   | not DE   | not DE   | not DE      |
| not DE   | not DE      | not DE   | not DE   | not DE   | not DE   | not DE   | not DE      |
| not DE   | not DE      | not DE   | not DE   | not DE   | not DE   | not DE   | not DE      |
| not DE   | not DE      | not DE   | not DE   | not DE   | not DE   | not DE   | not DE      |
| not DE   | not DE      | not DE   | not DE   | not DE   | not DE   | -1.51179 | 0.013079198 |
| not DE   | not DE      | not DE   | not DE   | not DE   | not DE   | -1.10449 | 0.010547039 |
| not DE   | not DE      | not DE   | not DE   | not DE   | not DE   | not DE   | not DE      |
| not DE   | not DE      | not DE   | not DE   | not DE   | not DE   | not DE   | not DE      |
| not DE   | not DE      | not DE   | not DE   | not DE   | not DE   | not DE   | not DE      |
| not DE   | not DE      | not DE   | not DE   | not DE   | not DE   | not DE   | not DE      |
| not DE   | not DE      | 3.283106 | 0.006194 | not DE   | not DE   | 2.726719 | 0.00796107  |
| not DE   | not DE      | -4.29332 | 1.10E-10 | not DE   | not DE   | -3.35065 | 1.55E-10    |
| not DE   | not DE      | not DE   | not DE   | not DE   | not DE   | not DE   | not DE      |
| 2.991608 | 2.52E-09    | 2.389305 | 0.02912  | 3.448373 | 4.71E-10 | 3.674779 | 2.38E-14    |
| not DE   | not DE      | not DE   | not DE   | not DE   | not DE   | not DE   | not DE      |
| not DE   | not DE      | not DE   | not DE   | not DE   | not DE   | not DE   | not DE      |
| not DE   | not DE      | not DE   | not DE   | not DE   | not DE   | not DE   | not DE      |
| not DE   | not DE      | not DE   | not DE   | not DE   | not DE   | not DE   | not DE      |
| not DE   | not DE      | not DE   | not DE   | not DE   | not DE   | not DE   | not DE      |
| not DE   | not DE      | not DE   | not DE   | not DE   | not DE   | not DE   | not DE      |
| not DE   | not DE      | not DE   | not DE   | not DE   | not DE   | not DE   | not DE      |
| not DE   | not DE      | not DE   | not DE   | not DE   | not DE   | not DE   | not DE      |
| not DE   | not DE      | not DE   | not DE   | not DE   | not DE   | not DE   | not DE      |
| not DE   | not DE      | not DE   | not DE   | not DE   | not DE   | not DE   | not DE      |
| not DE   | not DE      | not DE   | not DE   | not DE   | not DE   | not DE   | not DE      |
| not DE   | not DE      | not DE   | not DE   | not DE   | not DE   | not DE   | not DE      |
| not DE   | not DE      | not DE   | not DE   | not DE   | not DE   | -1.45313 | 0.029324379 |
| not DE   | not DE      | not DE   | not DE   | not DE   | not DE   | not DE   | not DE      |
| not DE   | not DE      | not DE   | not DE   | not DE   | not DE   | not DE   | not DE      |
| 2.12082  | 5.90E-09    | 2.176659 | 0.013033 | not DE   | not DE   | 2.847086 | 9.06E-19    |
| not DE   | not DE      | not DE   | not DE   | not DE   | not DE   | not DE   | not DE      |
| not DE   | not DE      | not DE   | not DE   | not DE   | not DE   | not DE   | not DE      |
| not DE   | not DE      | not DE   | not DE   | not DE   | not DE   | not DE   | not DE      |
| not DE   | not DE      | not DE   | not DE   | not DE   | not DE   | not DE   | not DE      |
| not DE   | not DE      | not DE   | not DE   | not DE   | not DE   | not DE   | not DE      |
| not DE   | not DE      | not DE   | not DE   | not DE   | not DE   | not DE   | not DE      |
| not DE   | not DE      | not DE   | not DE   | not DE   | not DE   | not DE   | not DE      |
| not DE   | not DE      | not DE   | not DE   | not DE   | not DE   | not DE   | not DE      |
| not DE   | not DE      | not DE   | not DE   | not DE   | not DE   | not DE   | not DE      |
| not DE   | not DE      | not DE   | not DE   | not DE   | not DE   | not DE   | not DE      |
| not DE   | not DE      | not DE   | not DE   | not DE   | not DE   | not DE   | not DE      |
| not DE   | not DE      | not DE   | not DE   | not DE   | not DE   | not DE   | not DE      |
| not DE   | not DE      | not DE   | not DE   | not DE   | not DE   | not DE   | not DE      |
| not DE   | not DE      | not DE   | not DE   | not DE   | not DE   | not DE   | not DE      |
| not DE   | not DE      | not DE   | not DE   | not DE   | not DE   | not DE   | not DE      |
| not DE   | not DE      | not DE   | not DE   | not DE   | not DE   | not DE   | not DE      |
| not DE   | not DE      | not DE   | not DE   | not DE   | not DE   | not DE   | not DE      |
| not DE   | not DE      | not DE   | not DE   | not DE   | not DE   | not DE   | not DE      |
| not DE   | not DE      | not DE   | not DE   | not DE   | not DE   | not DE   | not DE      |
| not DE   | not DE      | not DE   | not DE   | not DE   | not DE   | not DE   | not DE      |
| -1.07572 | 0.000715627 | not DE   | not DE   | not DE   | not DE   | -1.76933 | 1.40E-07    |
| not DE   | not DE      | not DE   | not DE   | not DE   | not DE   | not DE   | not DE      |
| not DE   | not DE      | not DE   | not DE   | not DE   | not DE   | -1.37003 | 0.004871059 |
| not DE   | not DE      | not DE   | not DE   | not DE   | not DE   | not DE   | not DE      |
| 1.263744 | 0.023500449 | not DE   | not DE   | not DE   | not DE   | 1.445473 | 0.000463256 |



















|           |              |           |           |           |           |           |              |
|-----------|--------------|-----------|-----------|-----------|-----------|-----------|--------------|
| not DE    | not DE       | not DE    | not DE    | not DE    | not DE    | not DE    | not DE       |
| not DE    | not DE       | not DE    | not DE    | not DE    | not DE    | not DE    | not DE       |
| not DE    | not DE       | not DE    | not DE    | not DE    | not DE    | not DE    | not DE       |
| 1. 591252 | 9. 72E-09    | not DE    | not DE    | not DE    | not DE    | 1. 437853 | 0. 000149393 |
| not DE    | not DE       | not DE    | not DE    | not DE    | not DE    | not DE    | not DE       |
| not DE    | not DE       | not DE    | not DE    | not DE    | not DE    | not DE    | not DE       |
| not DE    | not DE       | not DE    | not DE    | not DE    | not DE    | -2. 49031 | 0. 007313975 |
| 2. 986017 | 0. 001854707 | not DE    | not DE    | not DE    | not DE    | not DE    | not DE       |
| not DE    | not DE       | not DE    | not DE    | not DE    | not DE    | not DE    | not DE       |
| not DE    | not DE       | not DE    | not DE    | not DE    | not DE    | not DE    | not DE       |
| -1. 54863 | 0. 000811918 | not DE    | not DE    | not DE    | not DE    | -2. 66628 | 1. 63E-06    |
| not DE    | not DE       | not DE    | not DE    | not DE    | not DE    | not DE    | not DE       |
| not DE    | not DE       | not DE    | not DE    | not DE    | not DE    | not DE    | not DE       |
| not DE    | not DE       | not DE    | not DE    | not DE    | not DE    | not DE    | not DE       |
| not DE    | not DE       | not DE    | not DE    | not DE    | not DE    | not DE    | not DE       |
| not DE    | not DE       | not DE    | not DE    | not DE    | not DE    | not DE    | not DE       |
| not DE    | not DE       | not DE    | not DE    | not DE    | not DE    | not DE    | not DE       |
| not DE    | not DE       | -2. 16249 | 0. 038462 | not DE    | not DE    | 2. 395864 | 1. 54E-06    |
| 1. 872306 | 3. 87E-19    | not DE    | not DE    | 1. 138166 | 5. 68E-08 | 2. 608534 | 3. 02E-26    |
| not DE    | not DE       | not DE    | not DE    | not DE    | not DE    | not DE    | not DE       |
| not DE    | not DE       | not DE    | not DE    | not DE    | not DE    | not DE    | not DE       |
| not DE    | not DE       | not DE    | not DE    | not DE    | not DE    | not DE    | not DE       |
| not DE    | not DE       | not DE    | not DE    | not DE    | not DE    | not DE    | not DE       |
| not DE    | not DE       | not DE    | not DE    | not DE    | not DE    | not DE    | not DE       |
| not DE    | not DE       | not DE    | not DE    | not DE    | not DE    | not DE    | not DE       |
| not DE    | not DE       | not DE    | not DE    | not DE    | not DE    | not DE    | not DE       |
| not DE    | not DE       | not DE    | not DE    | not DE    | not DE    | -1. 30293 | 0. 032954828 |
| not DE    | not DE       | not DE    | not DE    | not DE    | not DE    | not DE    | not DE       |
| not DE    | not DE       | not DE    | not DE    | not DE    | not DE    | not DE    | not DE       |
| not DE    | not DE       | not DE    | not DE    | not DE    | not DE    | not DE    | not DE       |
| 2. 697892 | 0. 001392659 | not DE    | not DE    | not DE    | not DE    | 3. 91828  | 1. 08E-07    |
| not DE    | not DE       | -1. 38519 | 0. 009382 | not DE    | not DE    | not DE    | not DE       |
| not DE    | not DE       | not DE    | not DE    | not DE    | not DE    | not DE    | not DE       |
| not DE    | not DE       | not DE    | not DE    | not DE    | not DE    | not DE    | not DE       |
| not DE    | not DE       | not DE    | not DE    | not DE    | not DE    | not DE    | not DE       |
| not DE    | not DE       | not DE    | not DE    | not DE    | not DE    | not DE    | not DE       |
| not DE    | not DE       | not DE    | not DE    | not DE    | not DE    | not DE    | not DE       |
| not DE    | not DE       | not DE    | not DE    | not DE    | not DE    | not DE    | not DE       |
| not DE    | not DE       | not DE    | not DE    | not DE    | not DE    | not DE    | not DE       |
| not DE    | not DE       | not DE    | not DE    | not DE    | not DE    | not DE    | not DE       |
| not DE    | not DE       | not DE    | not DE    | not DE    | not DE    | not DE    | not DE       |
| not DE    | not DE       | not DE    | not DE    | not DE    | not DE    | not DE    | not DE       |
| not DE    | not DE       | not DE    | not DE    | not DE    | not DE    | not DE    | not DE       |
| not DE    | not DE       | not DE    | not DE    | not DE    | not DE    | not DE    | not DE       |
| not DE    | not DE       | not DE    | not DE    | not DE    | not DE    | not DE    | not DE       |
| not DE    | not DE       | not DE    | not DE    | not DE    | not DE    | not DE    | not DE       |
| not DE    | not DE       | -2. 57195 | 0. 003098 | not DE    | not DE    | -1. 57451 | 0. 049325207 |
| 1. 134057 | 0. 023896595 | not DE    | not DE    | not DE    | not DE    | 1. 286442 | 0. 015091349 |
| not DE    | not DE       | not DE    | not DE    | not DE    | not DE    | not DE    | not DE       |
| not DE    | not DE       | not DE    | not DE    | not DE    | not DE    | not DE    | not DE       |
| not DE    | not DE       | not DE    | not DE    | not DE    | not DE    | not DE    | not DE       |
| not DE    | not DE       | not DE    | not DE    | not DE    | not DE    | 1. 373132 | 1. 64E-06    |

|           |              |        |        |           |           |           |              |
|-----------|--------------|--------|--------|-----------|-----------|-----------|--------------|
| not DE    | not DE       | not DE | not DE | not DE    | not DE    | not DE    | not DE       |
| not DE    | not DE       | not DE | not DE | not DE    | not DE    | not DE    | not DE       |
| 2. 61158  | 1. 52E-21    | not DE | not DE | not DE    | not DE    | 2. 618378 | 2. 36E-09    |
| not DE    | not DE       | not DE | not DE | not DE    | not DE    | not DE    | not DE       |
| -3. 04867 | 0. 004198358 | not DE | not DE | not DE    | not DE    | not DE    | not DE       |
| not DE    | not DE       | not DE | not DE | not DE    | not DE    | not DE    | not DE       |
| not DE    | not DE       | not DE | not DE | not DE    | not DE    | not DE    | not DE       |
| not DE    | not DE       | not DE | not DE | not DE    | not DE    | not DE    | not DE       |
| not DE    | not DE       | not DE | not DE | not DE    | not DE    | not DE    | not DE       |
| not DE    | not DE       | not DE | not DE | not DE    | not DE    | not DE    | not DE       |
| not DE    | not DE       | not DE | not DE | not DE    | not DE    | -1. 79189 | 0. 0297476   |
| not DE    | not DE       | not DE | not DE | not DE    | not DE    | not DE    | not DE       |
| not DE    | not DE       | not DE | not DE | not DE    | not DE    | not DE    | not DE       |
| not DE    | not DE       | not DE | not DE | not DE    | not DE    | not DE    | not DE       |
| not DE    | not DE       | not DE | not DE | not DE    | not DE    | not DE    | not DE       |
| not DE    | not DE       | not DE | not DE | not DE    | not DE    | not DE    | not DE       |
| not DE    | not DE       | not DE | not DE | not DE    | not DE    | not DE    | not DE       |
| -1. 58091 | 0. 012937919 | not DE | not DE | not DE    | not DE    | not DE    | not DE       |
| not DE    | not DE       | not DE | not DE | not DE    | not DE    | not DE    | not DE       |
| not DE    | not DE       | not DE | not DE | not DE    | not DE    | not DE    | not DE       |
| not DE    | not DE       | not DE | not DE | not DE    | not DE    | not DE    | not DE       |
| not DE    | not DE       | not DE | not DE | not DE    | not DE    | not DE    | not DE       |
| not DE    | not DE       | not DE | not DE | not DE    | not DE    | not DE    | not DE       |
| not DE    | not DE       | not DE | not DE | not DE    | not DE    | not DE    | not DE       |
| not DE    | not DE       | not DE | not DE | not DE    | not DE    | not DE    | not DE       |
| not DE    | not DE       | not DE | not DE | not DE    | not DE    | not DE    | not DE       |
| not DE    | not DE       | not DE | not DE | not DE    | not DE    | not DE    | not DE       |
| 2. 529738 | 0. 010195158 | not DE | not DE | not DE    | not DE    | not DE    | not DE       |
| not DE    | not DE       | not DE | not DE | not DE    | not DE    | not DE    | not DE       |
| not DE    | not DE       | not DE | not DE | not DE    | not DE    | not DE    | not DE       |
| not DE    | not DE       | not DE | not DE | not DE    | not DE    | not DE    | not DE       |
| not DE    | not DE       | not DE | not DE | not DE    | not DE    | not DE    | not DE       |
| not DE    | not DE       | not DE | not DE | not DE    | not DE    | not DE    | not DE       |
| not DE    | not DE       | not DE | not DE | not DE    | not DE    | not DE    | not DE       |
| not DE    | not DE       | not DE | not DE | not DE    | not DE    | not DE    | not DE       |
| not DE    | not DE       | not DE | not DE | not DE    | not DE    | not DE    | not DE       |
| not DE    | not DE       | not DE | not DE | not DE    | not DE    | not DE    | not DE       |
| not DE    | not DE       | not DE | not DE | not DE    | not DE    | not DE    | not DE       |
| -1. 00595 | 8. 31E-09    | not DE | not DE | not DE    | not DE    | -2. 13941 | 2. 83E-13    |
| not DE    | not DE       | not DE | not DE | not DE    | not DE    | -1. 48523 | 0. 042260712 |
| not DE    | not DE       | not DE | not DE | not DE    | not DE    | not DE    | not DE       |
| not DE    | not DE       | not DE | not DE | not DE    | not DE    | not DE    | not DE       |
| not DE    | not DE       | not DE | not DE | not DE    | not DE    | not DE    | not DE       |
| not DE    | not DE       | not DE | not DE | -1. 5946  | 0. 024527 | not DE    | not DE       |
| not DE    | not DE       | not DE | not DE | -2. 54996 | 0. 012096 | not DE    | not DE       |
| 1. 74834  | 0. 017440211 | not DE | not DE | not DE    | not DE    | not DE    | not DE       |
| -1. 38234 | 0. 007343337 | not DE | not DE | not DE    | not DE    | -2. 90571 | 4. 89E-13    |
| not DE    | not DE       | not DE | not DE | not DE    | not DE    | not DE    | not DE       |
| not DE    | not DE       | not DE | not DE | not DE    | not DE    | not DE    | not DE       |
| not DE    | not DE       | not DE | not DE | not DE    | not DE    | not DE    | not DE       |
| not DE    | not DE       | not DE | not DE | not DE    | not DE    | 1. 253799 | 1. 32E-10    |
| not DE    | not DE       | not DE | not DE | not DE    | not DE    | not DE    | not DE       |
| not DE    | not DE       | not DE | not DE | not DE    | not DE    | -2. 65209 | 0. 039399792 |
| not DE    | not DE       | not DE | not DE | not DE    | not DE    | not DE    | not DE       |
| not DE    | not DE       | not DE | not DE | not DE    | not DE    | not DE    | not DE       |
| not DE    | not DE       | not DE | not DE | not DE    | not DE    | not DE    | not DE       |
| not DE    | not DE       | not DE | not DE | not DE    | not DE    | not DE    | not DE       |
| not DE    | not DE       | not DE | not DE | not DE    | not DE    | not DE    | not DE       |
| 3. 592586 | 2. 17E-06    | not DE | not DE | not DE    | not DE    | 3. 664842 | 0. 004100509 |
| not DE    | not DE       | not DE | not DE | -1. 3005  | 1. 01E-09 | not DE    | not DE       |
| not DE    | not DE       | not DE | not DE | not DE    | not DE    | not DE    | not DE       |
| not DE    | not DE       | not DE | not DE | not DE    | not DE    | 1. 673623 | 2. 45E-06    |
| 1. 015185 | 0. 010639371 | not DE | not DE | not DE    | not DE    | not DE    | not DE       |
| not DE    | not DE       | not DE | not DE | not DE    | not DE    | not DE    | not DE       |
| not DE    | not DE       | not DE | not DE | not DE    | not DE    | not DE    | not DE       |
| not DE    | not DE       | not DE | not DE | 1. 557515 | 0. 022441 | not DE    | not DE       |
| not DE    | not DE       | not DE | not DE | not DE    | not DE    | 1. 748659 | 0. 043864741 |





































|          |             |          |          |          |          |          |             |
|----------|-------------|----------|----------|----------|----------|----------|-------------|
| not DE   | not DE      | not DE   | not DE   | 1.562532 | 0.047051 | not DE   | not DE      |
| not DE   | not DE      | not DE   | not DE   | not DE   | not DE   | not DE   | not DE      |
| not DE   | not DE      | not DE   | not DE   | not DE   | not DE   | -1.03204 | 0.028203001 |
| 1.54914  | 0.004181805 | not DE   | not DE   | not DE   | not DE   | 1.60536  | 2.38E-05    |
| not DE   | not DE      | not DE   | not DE   | not DE   | not DE   | not DE   | not DE      |
| -1.3465  | 0.044084583 | not DE   | not DE   | not DE   | not DE   | -1.11939 | 0.041466381 |
| not DE   | not DE      | not DE   | not DE   | not DE   | not DE   | -1.16666 | 0.011595772 |
| not DE   | not DE      | not DE   | not DE   | not DE   | not DE   | not DE   | not DE      |
| not DE   | not DE      | not DE   | not DE   | not DE   | not DE   | not DE   | not DE      |
| not DE   | not DE      | not DE   | not DE   | not DE   | not DE   | -2.36636 | 0.00402132  |
| not DE   | not DE      | not DE   | not DE   | not DE   | not DE   | not DE   | not DE      |
| not DE   | not DE      | not DE   | not DE   | not DE   | not DE   | not DE   | not DE      |
| not DE   | not DE      | not DE   | not DE   | not DE   | not DE   | not DE   | not DE      |
| not DE   | not DE      | not DE   | not DE   | not DE   | not DE   | not DE   | not DE      |
| not DE   | not DE      | not DE   | not DE   | not DE   | not DE   | not DE   | not DE      |
| not DE   | not DE      | not DE   | not DE   | not DE   | not DE   | not DE   | not DE      |
| not DE   | not DE      | not DE   | not DE   | not DE   | not DE   | not DE   | not DE      |
| not DE   | not DE      | not DE   | not DE   | not DE   | not DE   | not DE   | not DE      |
| not DE   | not DE      | not DE   | not DE   | not DE   | not DE   | not DE   | not DE      |
| not DE   | not DE      | not DE   | not DE   | not DE   | not DE   | not DE   | not DE      |
| not DE   | not DE      | not DE   | not DE   | not DE   | not DE   | not DE   | not DE      |
| not DE   | not DE      | not DE   | not DE   | not DE   | not DE   | not DE   | not DE      |
| not DE   | not DE      | not DE   | not DE   | 2.551173 | 0.000755 | not DE   | not DE      |
| not DE   | not DE      | -1.82789 | 0.041799 | not DE   | not DE   | not DE   | not DE      |
| not DE   | not DE      | not DE   | not DE   | not DE   | not DE   | not DE   | not DE      |
| not DE   | not DE      | not DE   | not DE   | not DE   | not DE   | 2.921784 | 0.002724728 |
| not DE   | not DE      | not DE   | not DE   | not DE   | not DE   | not DE   | not DE      |
| not DE   | not DE      | not DE   | not DE   | not DE   | not DE   | not DE   | not DE      |
| not DE   | not DE      | not DE   | not DE   | not DE   | not DE   | not DE   | not DE      |
| not DE   | not DE      | not DE   | not DE   | not DE   | not DE   | not DE   | not DE      |
| not DE   | not DE      | not DE   | not DE   | not DE   | not DE   | not DE   | not DE      |
| not DE   | not DE      | not DE   | not DE   | not DE   | not DE   | not DE   | not DE      |
| not DE   | not DE      | not DE   | not DE   | not DE   | not DE   | not DE   | not DE      |
| not DE   | not DE      | not DE   | not DE   | not DE   | not DE   | not DE   | not DE      |
| not DE   | not DE      | not DE   | not DE   | not DE   | not DE   | not DE   | not DE      |
| -1.42186 | 0.005659801 | -3.38591 | 0.002382 | not DE   | not DE   | -4.09546 | 1.04E-14    |
| not DE   | not DE      | not DE   | not DE   | not DE   | not DE   | -1.67314 | 0.030815093 |
| not DE   | not DE      | 1.289987 | 0.021962 | not DE   | not DE   | not DE   | not DE      |
| not DE   | not DE      | not DE   | not DE   | not DE   | not DE   | not DE   | not DE      |
| not DE   | not DE      | 1.190928 | 0.010446 | not DE   | not DE   | 1.043732 | 0.012623665 |
| not DE   | not DE      | not DE   | not DE   | not DE   | not DE   | not DE   | not DE      |
| not DE   | not DE      | not DE   | not DE   | not DE   | not DE   | not DE   | not DE      |
| -2.11665 | 6.46E-06    | not DE   | not DE   | not DE   | not DE   | -2.01033 | 0.003792657 |
| not DE   | not DE      | not DE   | not DE   | not DE   | not DE   | not DE   | not DE      |
| not DE   | not DE      | not DE   | not DE   | not DE   | not DE   | not DE   | not DE      |
| not DE   | not DE      | not DE   | not DE   | not DE   | not DE   | not DE   | not DE      |
| not DE   | not DE      | not DE   | not DE   | not DE   | not DE   | not DE   | not DE      |
| not DE   | not DE      | not DE   | not DE   | not DE   | not DE   | not DE   | not DE      |
| not DE   | not DE      | not DE   | not DE   | not DE   | not DE   | not DE   | not DE      |
| not DE   | not DE      | not DE   | not DE   | not DE   | not DE   | not DE   | not DE      |
| not DE   | not DE      | not DE   | not DE   | not DE   | not DE   | not DE   | not DE      |
| not DE   | not DE      | not DE   | not DE   | not DE   | not DE   | not DE   | not DE      |
| not DE   | not DE      | not DE   | not DE   | not DE   | not DE   | not DE   | not DE      |
| not DE   | not DE      | not DE   | not DE   | not DE   | not DE   | not DE   | not DE      |
| not DE   | not DE      | not DE   | not DE   | not DE   | not DE   | not DE   | not DE      |
| not DE   | not DE      | not DE   | not DE   | not DE   | not DE   | not DE   | not DE      |
| not DE   | not DE      | not DE   | not DE   | not DE   | not DE   | not DE   | not DE      |
| not DE   | not DE      | not DE   | not DE   | not DE   | not DE   | not DE   | not DE      |
| not DE   | not DE      | not DE   | not DE   | not DE   | not DE   | not DE   | not DE      |
| not DE   | not DE      | not DE   | not DE   | not DE   | not DE   | not DE   | not DE      |
| 3.366119 | 2.70E-12    | 1.730787 | 0.023977 | not DE   | not DE   | 4.768105 | 1.07E-24    |
| not DE   | not DE      | not DE   | not DE   | not DE   | not DE   | not DE   | not DE      |
| not DE   | not DE      | not DE   | not DE   | not DE   | not DE   | not DE   | not DE      |
| not DE   | not DE      | not DE   | not DE   | not DE   | not DE   | not DE   | not DE      |
| not DE   | not DE      | not DE   | not DE   | not DE   | not DE   | not DE   | not DE      |
| not DE   | not DE      | not DE   | not DE   | not DE   | not DE   | not DE   | not DE      |
| not DE   | not DE      | not DE   | not DE   | not DE   | not DE   | not DE   | not DE      |
| not DE   | not DE      | not DE   | not DE   | not DE   | not DE   | 1.418721 | 2.44E-07    |
| not DE   | not DE      | not DE   | not DE   | not DE   | not DE   | -1.25761 | 0.02934912  |







|          |             |        |          |          |          |          |             |
|----------|-------------|--------|----------|----------|----------|----------|-------------|
| not DE   | not DE      | not DE | not DE   | not DE   | not DE   | not DE   | not DE      |
| not DE   | not DE      | not DE | not DE   | not DE   | not DE   | not DE   | not DE      |
| not DE   | not DE      | not DE | not DE   | not DE   | not DE   | not DE   | not DE      |
| not DE   | not DE      | not DE | not DE   | not DE   | not DE   | not DE   | not DE      |
| -1.78563 | 0.005233346 | not DE | not DE   | not DE   | not DE   | not DE   | not DE      |
| not DE   | not DE      | not DE | not DE   | not DE   | not DE   | -1.7836  | 7.32E-05    |
| not DE   | not DE      | not DE | not DE   | not DE   | not DE   | not DE   | not DE      |
| not DE   | not DE      | not DE | not DE   | not DE   | not DE   | not DE   | not DE      |
| -1.2167  | 3.22E-06    | not DE | not DE   | not DE   | not DE   | -2.02167 | 2.52E-06    |
| not DE   | not DE      | not DE | not DE   | not DE   | not DE   | -1.40452 | 0.015966224 |
| not DE   | not DE      | not DE | not DE   | not DE   | not DE   | not DE   | not DE      |
| not DE   | not DE      | not DE | not DE   | not DE   | not DE   | not DE   | not DE      |
| not DE   | not DE      | not DE | not DE   | not DE   | not DE   | not DE   | not DE      |
| not DE   | not DE      | not DE | not DE   | not DE   | not DE   | not DE   | not DE      |
| not DE   | not DE      | not DE | not DE   | not DE   | not DE   | not DE   | not DE      |
| not DE   | not DE      | not DE | not DE   | not DE   | not DE   | not DE   | not DE      |
| not DE   | not DE      | not DE | not DE   | not DE   | not DE   | not DE   | not DE      |
| not DE   | not DE      | not DE | not DE   | not DE   | not DE   | -2.27913 | 0.00888928  |
| not DE   | not DE      | not DE | not DE   | not DE   | not DE   | not DE   | not DE      |
| not DE   | not DE      | not DE | not DE   | not DE   | not DE   | not DE   | not DE      |
| not DE   | not DE      | not DE | not DE   | not DE   | not DE   | not DE   | not DE      |
| -1.18238 | 0.028562308 | not DE | not DE   | not DE   | not DE   | not DE   | not DE      |
| not DE   | not DE      | not DE | not DE   | not DE   | not DE   | not DE   | not DE      |
| not DE   | not DE      | not DE | not DE   | not DE   | not DE   | not DE   | not DE      |
| not DE   | not DE      | not DE | not DE   | not DE   | not DE   | not DE   | not DE      |
| not DE   | not DE      | not DE | not DE   | not DE   | not DE   | not DE   | not DE      |
| not DE   | not DE      | not DE | not DE   | not DE   | not DE   | not DE   | not DE      |
| not DE   | not DE      | not DE | not DE   | not DE   | not DE   | not DE   | not DE      |
| not DE   | not DE      | not DE | not DE   | not DE   | not DE   | not DE   | not DE      |
| not DE   | not DE      | not DE | not DE   | not DE   | not DE   | not DE   | not DE      |
| 3.219532 | 3.38E-13    | not DE | not DE   | not DE   | not DE   | 3.323266 | 2.32E-25    |
| not DE   | not DE      | not DE | not DE   | not DE   | not DE   | not DE   | not DE      |
| not DE   | not DE      | not DE | not DE   | not DE   | not DE   | not DE   | not DE      |
| not DE   | not DE      | not DE | not DE   | not DE   | not DE   | not DE   | not DE      |
| -2.28577 | 2.09E-05    | not DE | not DE   | not DE   | not DE   | not DE   | not DE      |
| not DE   | not DE      | not DE | not DE   | not DE   | not DE   | not DE   | not DE      |
| -2.05545 | 4.26E-08    | not DE | not DE   | not DE   | not DE   | -2.28352 | 6.34E-06    |
| 2.371463 | 3.81E-07    | not DE | not DE   | not DE   | not DE   | 2.778235 | 4.65E-06    |
| not DE   | not DE      | not DE | not DE   | not DE   | not DE   | not DE   | not DE      |
| not DE   | not DE      | not DE | not DE   | not DE   | not DE   | not DE   | not DE      |
| not DE   | not DE      | not DE | not DE   | not DE   | not DE   | not DE   | not DE      |
| not DE   | not DE      | not DE | not DE   | not DE   | not DE   | not DE   | not DE      |
| -1.63342 | 2.49E-14    | not DE | not DE   | not DE   | not DE   | not DE   | not DE      |
| -2.16913 | 0.007863828 | -1.393 | 0.001864 | -1.20346 | 1.99E-05 | -2.08146 | 7.70E-16    |
| not DE   | not DE      | not DE | not DE   | not DE   | not DE   | not DE   | not DE      |
| not DE   | not DE      | not DE | not DE   | not DE   | not DE   | -1.53349 | 0.012041721 |
| not DE   | not DE      | not DE | not DE   | not DE   | not DE   | not DE   | not DE      |
| -1.18027 | 0.007187115 | not DE | not DE   | not DE   | not DE   | -2.43908 | 1.03E-06    |
| not DE   | not DE      | not DE | not DE   | not DE   | not DE   | not DE   | not DE      |
| not DE   | not DE      | not DE | not DE   | not DE   | not DE   | not DE   | not DE      |
| not DE   | not DE      | not DE | not DE   | not DE   | not DE   | not DE   | not DE      |
| not DE   | not DE      | not DE | not DE   | not DE   | not DE   | -1.12601 | 0.014054895 |
| not DE   | not DE      | not DE | not DE   | not DE   | not DE   | not DE   | not DE      |
| not DE   | not DE      | not DE | not DE   | not DE   | not DE   | not DE   | not DE      |
| not DE   | not DE      | not DE | not DE   | not DE   | not DE   | not DE   | not DE      |
| not DE   | not DE      | not DE | not DE   | not DE   | not DE   | -1.27544 | 0.011700261 |
| not DE   | not DE      | not DE | not DE   | not DE   | not DE   | not DE   | not DE      |
| not DE   | not DE      | not DE | not DE   | not DE   | not DE   | -1.20146 | 0.028450947 |











|                        |                     |        |                    |                        |
|------------------------|---------------------|--------|--------------------|------------------------|
| 3. 34036 7. 45E-09     | not DE              | not DE | 1. 993781 0. 02674 | 3. 894423 1. 44E-11    |
| not DE not DE          | not DE              | not DE | not DE not DE      | not DE not DE          |
| not DE not DE          | not DE              | not DE | not DE not DE      | not DE not DE          |
| not DE not DE          | not DE              | not DE | not DE not DE      | not DE not DE          |
| not DE not DE          | not DE              | not DE | not DE not DE      | not DE not DE          |
| not DE not DE          | not DE              | not DE | not DE not DE      | not DE not DE          |
| not DE not DE          | not DE              | not DE | not DE not DE      | not DE not DE          |
| 1. 804574 0. 004216551 | not DE              | not DE | not DE not DE      | 1. 601504 0. 021847461 |
| not DE not DE          | not DE              | not DE | not DE not DE      | 1. 450075 5. 70E-06    |
| -1. 54672 0. 004637925 | not DE              | not DE | not DE not DE      | -1. 91816 0. 003270055 |
| not DE not DE          | not DE              | not DE | not DE not DE      | not DE not DE          |
| not DE not DE          | -1. 45053 0. 003901 | not DE | not DE not DE      | not DE not DE          |
| not DE not DE          | not DE              | not DE | not DE not DE      | not DE not DE          |
| not DE not DE          | not DE              | not DE | not DE not DE      | not DE not DE          |
| not DE not DE          | not DE              | not DE | not DE not DE      | not DE not DE          |
| not DE not DE          | not DE              | not DE | not DE not DE      | not DE not DE          |
| not DE not DE          | not DE              | not DE | not DE not DE      | not DE not DE          |
| not DE not DE          | not DE              | not DE | not DE not DE      | not DE not DE          |
| -2. 17529 0. 000751482 | not DE              | not DE | not DE not DE      | not DE not DE          |
| not DE not DE          | not DE              | not DE | not DE not DE      | not DE not DE          |
| not DE not DE          | not DE              | not DE | not DE not DE      | not DE not DE          |
| not DE not DE          | not DE              | not DE | not DE not DE      | not DE not DE          |
| 3. 35068 0. 000342288  | not DE              | not DE | not DE not DE      | 3. 23333 0. 000276537  |
| not DE not DE          | not DE              | not DE | not DE not DE      | not DE not DE          |
| -2. 9369 0. 000782505  | not DE              | not DE | not DE not DE      | -4. 168 2. 05E-05      |
| not DE not DE          | not DE              | not DE | not DE not DE      | not DE not DE          |
| not DE not DE          | not DE              | not DE | not DE not DE      | not DE not DE          |
| not DE not DE          | not DE              | not DE | not DE not DE      | not DE not DE          |
| not DE not DE          | not DE              | not DE | not DE not DE      | not DE not DE          |
| not DE not DE          | not DE              | not DE | not DE not DE      | not DE not DE          |
| 1. 402541 0. 011679274 | -2. 74767 0. 045004 | not DE | not DE not DE      | not DE not DE          |
| not DE not DE          | not DE              | not DE | not DE not DE      | not DE not DE          |
| not DE not DE          | not DE              | not DE | not DE not DE      | not DE not DE          |
| not DE not DE          | not DE              | not DE | not DE not DE      | -1. 22483 0. 004016069 |
| not DE not DE          | not DE              | not DE | not DE not DE      | not DE not DE          |
| not DE not DE          | not DE              | not DE | not DE not DE      | not DE not DE          |
| not DE not DE          | not DE              | not DE | not DE not DE      | not DE not DE          |
| not DE not DE          | not DE              | not DE | not DE not DE      | not DE not DE          |
| not DE not DE          | 1. 869315 0. 03624  | not DE | not DE not DE      | 1. 452428 3. 33E-07    |
| not DE not DE          | not DE              | not DE | not DE not DE      | 1. 315557 0. 041639551 |
| not DE not DE          | not DE              | not DE | not DE not DE      | not DE not DE          |
| not DE not DE          | not DE              | not DE | not DE not DE      | not DE not DE          |
| not DE not DE          | not DE              | not DE | not DE not DE      | not DE not DE          |
| not DE not DE          | not DE              | not DE | not DE not DE      | not DE not DE          |
| not DE not DE          | not DE              | not DE | not DE not DE      | not DE not DE          |
| not DE not DE          | not DE              | not DE | not DE not DE      | not DE not DE          |
| -3. 44364 9. 33E-07    | -4. 16108 1. 65E-07 | not DE | not DE not DE      | -5. 1138 7. 51E-10     |
| not DE not DE          | not DE              | not DE | not DE not DE      | not DE not DE          |
| not DE not DE          | not DE              | not DE | not DE not DE      | not DE not DE          |
| not DE not DE          | not DE              | not DE | not DE not DE      | not DE not DE          |
| not DE not DE          | not DE              | not DE | not DE not DE      | not DE not DE          |
| not DE not DE          | not DE              | not DE | not DE not DE      | not DE not DE          |
| not DE not DE          | not DE              | not DE | not DE not DE      | not DE not DE          |
| not DE not DE          | not DE              | not DE | not DE not DE      | not DE not DE          |
| 9. 641102 2. 60E-81    | 6. 714527 1. 67E-05 | not DE | not DE not DE      | 10. 39306 1. 74E-87    |
| not DE not DE          | not DE              | not DE | not DE not DE      | not DE not DE          |



|          |             |          |          |          |         |          |             |
|----------|-------------|----------|----------|----------|---------|----------|-------------|
| not DE   | not DE      | not DE   | not DE   | not DE   | not DE  | not DE   | not DE      |
| not DE   | not DE      | not DE   | not DE   | not DE   | not DE  | -1.18593 | 0.003783803 |
| not DE   | not DE      | not DE   | not DE   | not DE   | not DE  | not DE   | not DE      |
| not DE   | not DE      | not DE   | not DE   | not DE   | not DE  | 1.491686 | 0.001331389 |
| not DE   | not DE      | not DE   | not DE   | not DE   | not DE  | not DE   | not DE      |
| not DE   | not DE      | not DE   | not DE   | not DE   | not DE  | not DE   | not DE      |
| not DE   | not DE      | not DE   | not DE   | not DE   | not DE  | not DE   | not DE      |
| -1.4196  | 0.003207056 | not DE   | not DE   | not DE   | not DE  | -2.91848 | 3.50E-05    |
| not DE   | not DE      | not DE   | not DE   | not DE   | not DE  | not DE   | not DE      |
| not DE   | not DE      | not DE   | not DE   | not DE   | not DE  | not DE   | not DE      |
| not DE   | not DE      | not DE   | not DE   | not DE   | not DE  | not DE   | not DE      |
| 1.259185 | 0.031983776 | not DE   | not DE   | 1.420371 | 0.02624 | 3.334779 | 2.50E-06    |
| not DE   | not DE      | not DE   | not DE   | not DE   | not DE  | not DE   | not DE      |
| not DE   | not DE      | not DE   | not DE   | not DE   | not DE  | not DE   | not DE      |
| not DE   | not DE      | not DE   | not DE   | not DE   | not DE  | not DE   | not DE      |
| not DE   | not DE      | not DE   | not DE   | not DE   | not DE  | not DE   | not DE      |
| not DE   | not DE      | not DE   | not DE   | not DE   | not DE  | not DE   | not DE      |
| not DE   | not DE      | not DE   | not DE   | not DE   | not DE  | not DE   | not DE      |
| not DE   | not DE      | not DE   | not DE   | not DE   | not DE  | not DE   | not DE      |
| -1.54807 | 0.002866412 | not DE   | not DE   | not DE   | not DE  | -1.25227 | 0.03676474  |
| -1.71391 | 0.016819041 | not DE   | not DE   | not DE   | not DE  | -2.30612 | 0.000239668 |
| not DE   | not DE      | not DE   | not DE   | not DE   | not DE  | not DE   | not DE      |
| not DE   | not DE      | not DE   | not DE   | not DE   | not DE  | not DE   | not DE      |
| not DE   | not DE      | not DE   | not DE   | not DE   | not DE  | not DE   | not DE      |
| not DE   | not DE      | not DE   | not DE   | not DE   | not DE  | not DE   | not DE      |
| not DE   | not DE      | not DE   | not DE   | not DE   | not DE  | not DE   | not DE      |
| not DE   | not DE      | not DE   | not DE   | not DE   | not DE  | not DE   | not DE      |
| -1.26307 | 0.047468905 | not DE   | not DE   | not DE   | not DE  | -2.23086 | 0.002431023 |
| not DE   | not DE      | not DE   | not DE   | not DE   | not DE  | not DE   | not DE      |
| 1.133051 | 0.000177679 | not DE   | not DE   | not DE   | not DE  | 1.426835 | 5.16E-05    |
| not DE   | not DE      | not DE   | not DE   | not DE   | not DE  | not DE   | not DE      |
| 1.155297 | 0.02523903  | not DE   | not DE   | not DE   | not DE  | 2.24457  | 8.08E-05    |
| not DE   | not DE      | not DE   | not DE   | not DE   | not DE  | not DE   | not DE      |
| not DE   | not DE      | not DE   | not DE   | not DE   | not DE  | not DE   | not DE      |
| not DE   | not DE      | not DE   | not DE   | not DE   | not DE  | not DE   | not DE      |
| not DE   | not DE      | not DE   | not DE   | not DE   | not DE  | not DE   | not DE      |
| not DE   | not DE      | 2.008181 | 0.005026 | not DE   | not DE  | not DE   | not DE      |
| -2.45715 | 6.20E-05    | not DE   | not DE   | not DE   | not DE  | -3.22228 | 1.24E-07    |
| -1.14785 | 0.041816537 | not DE   | not DE   | not DE   | not DE  | -1.66163 | 0.00226686  |
| 2.924848 | 0.021883858 | not DE   | not DE   | not DE   | not DE  | not DE   | not DE      |
| not DE   | not DE      | not DE   | not DE   | not DE   | not DE  | not DE   | not DE      |
| not DE   | not DE      | not DE   | not DE   | not DE   | not DE  | not DE   | not DE      |
| not DE   | not DE      | not DE   | not DE   | not DE   | not DE  | not DE   | not DE      |
| not DE   | not DE      | not DE   | not DE   | not DE   | not DE  | not DE   | not DE      |
| not DE   | not DE      | not DE   | not DE   | not DE   | not DE  | not DE   | not DE      |
| not DE   | not DE      | not DE   | not DE   | not DE   | not DE  | -3.35924 | 0.000252737 |
| 1.135506 | 0.001568762 | not DE   | not DE   | not DE   | not DE  | not DE   | not DE      |
| not DE   | not DE      | not DE   | not DE   | not DE   | not DE  | -1.75451 | 0.003294522 |
| not DE   | not DE      | not DE   | not DE   | not DE   | not DE  | not DE   | not DE      |
| not DE   | not DE      | 1.940301 | 0.019498 | not DE   | not DE  | not DE   | not DE      |
| 1.19527  | 0.000101226 | not DE   | not DE   | not DE   | not DE  | 2.861636 | 4.78E-14    |
| not DE   | not DE      | not DE   | not DE   | -1.77674 | 0.03434 | not DE   | not DE      |
| not DE   | not DE      | not DE   | not DE   | not DE   | not DE  | not DE   | not DE      |
| -2.76509 | 0.004210922 | not DE   | not DE   | not DE   | not DE  | -3.82631 | 2.38E-05    |
| not DE   | not DE      | -2.31083 | 0.00319  | not DE   | not DE  | not DE   | not DE      |

















|          |             |          |          |          |          |          |             |
|----------|-------------|----------|----------|----------|----------|----------|-------------|
| -2.98559 | 0.002797314 | not DE   | not DE   | not DE   | not DE   | -4.43651 | 4.29E-05    |
| not DE   | not DE      | not DE   | not DE   | not DE   | not DE   | -2.24908 | 1.46E-11    |
| not DE   | not DE      | not DE   | not DE   | not DE   | not DE   | -1.46484 | 0.00209792  |
| not DE   | not DE      | not DE   | not DE   | not DE   | not DE   | not DE   | not DE      |
| not DE   | not DE      | not DE   | not DE   | not DE   | not DE   | not DE   | not DE      |
| not DE   | not DE      | not DE   | not DE   | not DE   | not DE   | not DE   | not DE      |
| not DE   | not DE      | not DE   | not DE   | not DE   | not DE   | not DE   | not DE      |
| -1.70009 | 0.001400096 | not DE   | not DE   | not DE   | not DE   | -2.71274 | 1.58E-06    |
| not DE   | not DE      | not DE   | not DE   | not DE   | not DE   | not DE   | not DE      |
| not DE   | not DE      | not DE   | not DE   | not DE   | not DE   | not DE   | not DE      |
| not DE   | not DE      | not DE   | not DE   | not DE   | not DE   | not DE   | not DE      |
| not DE   | not DE      | not DE   | not DE   | not DE   | not DE   | not DE   | not DE      |
| not DE   | not DE      | not DE   | not DE   | not DE   | not DE   | not DE   | not DE      |
| -5.71108 | 0.000367409 | not DE   | not DE   | -7.96554 | 0.000112 | -5.97804 | 0.000182787 |
| not DE   | not DE      | not DE   | not DE   | not DE   | not DE   | 1.165219 | 3.55E-06    |
| not DE   | not DE      | not DE   | not DE   | not DE   | not DE   | not DE   | not DE      |
| not DE   | not DE      | not DE   | not DE   | not DE   | not DE   | not DE   | not DE      |
| not DE   | not DE      | not DE   | not DE   | not DE   | not DE   | not DE   | not DE      |
| not DE   | not DE      | not DE   | not DE   | not DE   | not DE   | 1.279782 | 0.000141873 |
| not DE   | not DE      | not DE   | not DE   | not DE   | not DE   | not DE   | not DE      |
| 2.41207  | 6.07E-06    | not DE   | not DE   | not DE   | not DE   | 3.433269 | 9.87E-16    |
| 1.981161 | 1.23E-05    | not DE   | not DE   | not DE   | not DE   | 2.771341 | 1.44E-11    |
| -1.78231 | 0.001883381 | not DE   | not DE   | not DE   | not DE   | -2.28101 | 0.0001333   |
| not DE   | not DE      | not DE   | not DE   | not DE   | not DE   | not DE   | not DE      |
| not DE   | not DE      | not DE   | not DE   | not DE   | not DE   | not DE   | not DE      |
| not DE   | not DE      | 8.003949 | 4.73E-08 | not DE   | not DE   | not DE   | not DE      |
| not DE   | not DE      | not DE   | not DE   | not DE   | not DE   | 4.221844 | 0.001466849 |
| not DE   | not DE      | not DE   | not DE   | not DE   | not DE   | not DE   | not DE      |
| not DE   | not DE      | not DE   | not DE   | not DE   | not DE   | not DE   | not DE      |
| not DE   | not DE      | not DE   | not DE   | not DE   | not DE   | not DE   | not DE      |
| not DE   | not DE      | not DE   | not DE   | not DE   | not DE   | not DE   | not DE      |
| not DE   | not DE      | 7.591935 | 0.000123 | not DE   | not DE   | not DE   | not DE      |
| not DE   | not DE      | not DE   | not DE   | not DE   | not DE   | not DE   | not DE      |
| not DE   | not DE      | not DE   | not DE   | not DE   | not DE   | not DE   | not DE      |
| not DE   | not DE      | not DE   | not DE   | not DE   | not DE   | not DE   | not DE      |
| not DE   | not DE      | not DE   | not DE   | not DE   | not DE   | not DE   | not DE      |
| not DE   | not DE      | not DE   | not DE   | not DE   | not DE   | not DE   | not DE      |
| not DE   | not DE      | not DE   | not DE   | not DE   | not DE   | not DE   | not DE      |
| not DE   | not DE      | not DE   | not DE   | not DE   | not DE   | not DE   | not DE      |
| 4.106998 | 2.75E-08    | not DE   | not DE   | not DE   | not DE   | 4.901226 | 6.45E-10    |
| -1.55605 | 0.002824901 | not DE   | not DE   | not DE   | not DE   | -2.03999 | 2.05E-05    |
| not DE   | not DE      | -1.14086 | 0.036972 | not DE   | not DE   | -1.24388 | 0.009933478 |
| -1.74603 | 0.000619666 | not DE   | not DE   | not DE   | not DE   | -2.02896 | 0.002109684 |
| not DE   | not DE      | not DE   | not DE   | not DE   | not DE   | not DE   | not DE      |
| not DE   | not DE      | not DE   | not DE   | not DE   | not DE   | not DE   | not DE      |
| 1.371493 | 0.0008355   | not DE   | not DE   | 1.151871 | 0.00352  | 3.138929 | 2.61E-27    |
| 2.111987 | 9.76E-06    | not DE   | not DE   | 1.588377 | 0.002971 | 2.145344 | 4.43E-05    |
| not DE   | not DE      | not DE   | not DE   | not DE   | not DE   | -1.61342 | 0.032943348 |
| not DE   | not DE      | not DE   | not DE   | not DE   | not DE   | not DE   | not DE      |
| not DE   | not DE      | not DE   | not DE   | not DE   | not DE   | not DE   | not DE      |
| not DE   | not DE      | not DE   | not DE   | not DE   | not DE   | not DE   | not DE      |
| not DE   | not DE      | not DE   | not DE   | not DE   | not DE   | not DE   | not DE      |
| not DE   | not DE      | not DE   | not DE   | not DE   | not DE   | not DE   | not DE      |
| not DE   | not DE      | not DE   | not DE   | not DE   | not DE   | not DE   | not DE      |
| not DE   | not DE      | not DE   | not DE   | not DE   | not DE   | not DE   | not DE      |
| not DE   | not DE      | not DE   | not DE   | not DE   | not DE   | not DE   | not DE      |
| not DE   | not DE      | not DE   | not DE   | not DE   | not DE   | not DE   | not DE      |
| not DE   | not DE      | not DE   | not DE   | -1.04418 | 1.26E-07 | not DE   | not DE      |



















|          |             |          |          |          |          |          |             |
|----------|-------------|----------|----------|----------|----------|----------|-------------|
| not DE   | not DE      | not DE   | not DE   | not DE   | not DE   | not DE   | not DE      |
| not DE   | not DE      | not DE   | not DE   | not DE   | not DE   | 1.720742 | 0.001468064 |
| not DE   | not DE      | not DE   | not DE   | not DE   | not DE   | not DE   | not DE      |
| not DE   | not DE      | not DE   | not DE   | not DE   | not DE   | not DE   | not DE      |
| not DE   | not DE      | not DE   | not DE   | not DE   | not DE   | not DE   | not DE      |
| not DE   | not DE      | not DE   | not DE   | not DE   | not DE   | not DE   | not DE      |
| -1.29248 | 0.000540506 | -1.90306 | 1.86E-05 | not DE   | not DE   | -1.43731 | 0.017404203 |
| not DE   | not DE      | not DE   | not DE   | not DE   | not DE   | not DE   | not DE      |
| not DE   | not DE      | not DE   | not DE   | not DE   | not DE   | not DE   | not DE      |
| not DE   | not DE      | not DE   | not DE   | not DE   | not DE   | -1.24441 | 0.027444727 |
| not DE   | not DE      | not DE   | not DE   | not DE   | not DE   | not DE   | not DE      |
| not DE   | not DE      | not DE   | not DE   | not DE   | not DE   | 1.59001  | 0.029619444 |
| 1.055433 | 3.11E-05    | not DE   | not DE   | not DE   | not DE   | 1.343269 | 9.22E-08    |
| not DE   | not DE      | not DE   | not DE   | 1.939801 | 0.007391 | not DE   | not DE      |
| not DE   | not DE      | not DE   | not DE   | not DE   | not DE   | not DE   | not DE      |
| not DE   | not DE      | not DE   | not DE   | not DE   | not DE   | not DE   | not DE      |
| not DE   | not DE      | not DE   | not DE   | not DE   | not DE   | 1.052395 | 0.014988572 |
| not DE   | not DE      | not DE   | not DE   | not DE   | not DE   | not DE   | not DE      |
| not DE   | not DE      | not DE   | not DE   | not DE   | not DE   | not DE   | not DE      |
| not DE   | not DE      | not DE   | not DE   | not DE   | not DE   | 1.116552 | 1.46E-05    |
| not DE   | not DE      | 4.005742 | 8.83E-05 | not DE   | not DE   | not DE   | not DE      |
| not DE   | not DE      | not DE   | not DE   | not DE   | not DE   | not DE   | not DE      |
| not DE   | not DE      | not DE   | not DE   | not DE   | not DE   | -1.62842 | 0.000134122 |
| not DE   | not DE      | not DE   | not DE   | not DE   | not DE   | -1.02163 | 0.006517365 |
| not DE   | not DE      | not DE   | not DE   | not DE   | not DE   | not DE   | not DE      |
| not DE   | not DE      | not DE   | not DE   | not DE   | not DE   | not DE   | not DE      |
| not DE   | not DE      | not DE   | not DE   | not DE   | not DE   | not DE   | not DE      |
| not DE   | not DE      | not DE   | not DE   | not DE   | not DE   | not DE   | not DE      |
| not DE   | not DE      | not DE   | not DE   | not DE   | not DE   | not DE   | not DE      |
| not DE   | not DE      | not DE   | not DE   | not DE   | not DE   | not DE   | not DE      |
| not DE   | not DE      | not DE   | not DE   | not DE   | not DE   | not DE   | not DE      |
| not DE   | not DE      | not DE   | not DE   | not DE   | not DE   | not DE   | not DE      |
| not DE   | not DE      | not DE   | not DE   | not DE   | not DE   | not DE   | not DE      |
| not DE   | not DE      | not DE   | not DE   | not DE   | not DE   | not DE   | not DE      |
| not DE   | not DE      | not DE   | not DE   | not DE   | not DE   | not DE   | not DE      |
| not DE   | not DE      | not DE   | not DE   | not DE   | not DE   | not DE   | not DE      |
| not DE   | not DE      | not DE   | not DE   | not DE   | not DE   | not DE   | not DE      |
| not DE   | not DE      | not DE   | not DE   | not DE   | not DE   | not DE   | not DE      |
| not DE   | not DE      | not DE   | not DE   | not DE   | not DE   | not DE   | not DE      |
| not DE   | not DE      | not DE   | not DE   | not DE   | not DE   | not DE   | not DE      |
| not DE   | not DE      | not DE   | not DE   | not DE   | not DE   | not DE   | not DE      |
| not DE   | not DE      | not DE   | not DE   | not DE   | not DE   | not DE   | not DE      |
| -3.0126  | 0.012349958 | not DE   | not DE   | not DE   | not DE   | -4.61794 | 0.000211535 |
| not DE   | not DE      | not DE   | not DE   | not DE   | not DE   | not DE   | not DE      |
| not DE   | not DE      | not DE   | not DE   | not DE   | not DE   | not DE   | not DE      |
| not DE   | not DE      | not DE   | not DE   | not DE   | not DE   | not DE   | not DE      |
| not DE   | not DE      | not DE   | not DE   | not DE   | not DE   | not DE   | not DE      |
| not DE   | not DE      | not DE   | not DE   | not DE   | not DE   | not DE   | not DE      |
| not DE   | not DE      | not DE   | not DE   | not DE   | not DE   | not DE   | not DE      |
| not DE   | not DE      | not DE   | not DE   | not DE   | not DE   | not DE   | not DE      |
| not DE   | not DE      | not DE   | not DE   | not DE   | not DE   | not DE   | not DE      |
| not DE   | not DE      | not DE   | not DE   | not DE   | not DE   | not DE   | not DE      |
| not DE   | not DE      | not DE   | not DE   | not DE   | not DE   | not DE   | not DE      |
| not DE   | not DE      | not DE   | not DE   | not DE   | not DE   | not DE   | not DE      |
| not DE   | not DE      | not DE   | not DE   | not DE   | not DE   | not DE   | not DE      |
| -1.42853 | 7.36E-05    | not DE   | not DE   | not DE   | not DE   | -1.44446 | 6.53E-05    |
| not DE   | not DE      | not DE   | not DE   | not DE   | not DE   | not DE   | not DE      |
| not DE   | not DE      | not DE   | not DE   | not DE   | not DE   | not DE   | not DE      |
| 2.823933 | 0.019680786 | 3.852137 | 0.006996 | not DE   | not DE   | 3.265206 | 0.006526204 |
| not DE   | not DE      | not DE   | not DE   | not DE   | not DE   | 1.107893 | 2.41E-05    |
| not DE   | not DE      | -1.93632 | 0.001439 | not DE   | not DE   | -1.41916 | 0.01452721  |
| -4.23142 | 0.000467363 | not DE   | not DE   | not DE   | not DE   | -4.14408 | 0.000248311 |
| not DE   | not DE      | not DE   | not DE   | not DE   | not DE   | not DE   | not DE      |
| not DE   | not DE      | not DE   | not DE   | not DE   | not DE   | 1.226396 | 0.016687478 |
